# Supplementary material for: Spinal premotor interneurons controlling antagonistic muscles are spatially intermingled
Source: eLife. 2022 Dec 13;11:e81976. doi: 10.7554/eLife.81976 (PMC9844990; doi:10.7554/eLife.81976)
Supplement: Figure 3—figure supplement 1—source data 1. — The x-y coordinates are normalized (between –0.5 and 0.5) while z coordinates are in micron, with the axis origin taken at the border between L4 and L5 and negative values in the rostral direction. [file elife-81976-fig3-figsupp1-data1.xlsx]

## Sheet: Sheet1
0.234831	0.176562	-4784
-0.133009	-0.203152	-4798
-0.0999283	-0.111218	-4566
0.200172	-0.107725	-4546
0.0663639	0.0397604	-4292
0.152936	0.135556	-4320
0.0951586	0.0800444	-4064
-0.0705012	-0.0241917	-4062
0.343915	-0.0130646	-4052
0.0588344	-0.00354843	-4056
0.169542	0.0506439	-4058
0.165711	0.145057	-3608
0.170601	0.127296	-3604
0.249109	-0.202054	-3330
0.188167	0.0504789	-3350
0.184569	0.160364	-3350
0.257863	0.128874	-3350
0.233333	0.111727	-3350
0.129784	-0.00284765	-3360
0.173475	0.134348	-3362
0.200146	-0.199674	-3108
0.226855	-0.204401	-3118
-0.13866	-0.140629	-3094
-0.0931225	-0.133443	-3108
-0.118858	-0.169875	-3122
0.20185	0.161232	-3090
0.167625	0.0765801	-2616
0.188159	0.124215	-2630
0.187521	0.140689	-2642
0.13433	0.0325813	-2612
0.171968	0.0603731	-2636
0.257941	0.128836	-2644
0.0993811	0.094786	-2642
0.136517	0.0845264	-2402
0.327033	-0.254154	-2402
0.219697	0.118617	-5010
0.291425	0.126381	-4532
0.247803	-0.123731	-4288
0.184239	-0.0643924	-4296
-0.149163	-0.0514249	-4084
0.314919	-0.103885	-3836
-0.151414	-0.0954658	-3682
0.316502	0.0270949	-3688
0.117844	-7.92466e-05	-3676
0.114928	0.161478	-3678
0.157078	0.178629	-3366
0.21805	0.147295	-3366
0.0596059	0.0499993	-3098
0.25613	0.0845527	-2880
0.0947975	0.166684	-2880
0.312929	0.0622052	-2884
0.316038	-0.114358	-2676
0.0905781	0.130305	-2668
0.238829	0.116866	-2688
0.126662	0.114203	-2666
0.153377	0.0189765	-2688
0.100889	0.0744147	-2400
0.213644	0.147566	-5032
0.225059	0.153216	-5052
0.235229	0.170567	-4802
0.155129	0.0766093	-4772
0.165826	-0.119273	-4546
-0.100216	-0.188101	-4544
-0.127037	0.289357	-4279
-0.129097	-0.0183802	-4263
-0.283137	-0.257992	-4239
0.0778	-0.0636082	-4243
0.0307731	-0.0608803	-4243
0.0466294	-0.0759112	-4241
0.104352	0.0550529	-4265
0.17036	0.0958986	-4253
0.0771737	0.226869	-4271
0.252976	-0.0286643	-4048
-0.168967	-0.0674147	-4046
-0.07613	-0.155497	-4044
0.194438	-0.0190434	-3808
0.17662	0.0382711	-3836
-0.224929	0.200737	-3572
-0.170903	-0.174317	-3568
-0.11594	-0.105109	-3570
-0.105431	-0.0620285	-3574
-0.111806	-0.177278	-3582
0.26888	0.0301285	-3572
0.293992	0.008936	-3572
0.195431	0.138099	-3574
0.156965	0.0166528	-3574
0.144739	-0.0224189	-3576
0.262003	-0.0401905	-3578
0.292417	-0.0207407	-3600
0.235438	0.0825899	-3602
0.237787	-0.00553659	-3600
0.172795	0.287355	-3320
0.0796885	0.272658	-3320
0.266822	0.0814124	-3312
0.201354	0.0437908	-3312
0.294401	-0.0553698	-3312
0.2826	0.157002	-3300
-0.0906952	-0.0780013	-3290
0.106459	-0.103324	-3296
-0.10548	0.00688874	-3312
-0.183782	-0.22427	-3308
-0.171501	0.088068	-3306
-0.0837626	0.0456096	-3292
-0.137107	-0.00968688	-3284
-0.132941	-0.00283811	-3284
0.234873	0.220833	-3296
0.104133	0.157315	-3316
-0.0916314	-0.0982335	-3092
-0.0601754	-0.0840789	-3100
-0.138659	-0.0150036	-3108
-0.222775	0.0213604	-3092
0.0185046	0.0396387	-3096
0.157342	0.132051	-3120
0.148055	0.186258	-3102
0.230315	0.13758	-3090
0.243869	0.169207	-3110
0.264206	0.169092	-3124
0.303761	0.0995534	-3100
0.2707	-0.0108443	-3112
0.292772	-0.0606424	-3110
0.29723	-0.0506328	-3100
-0.207416	0.160181	-2862
-0.0733853	-0.0834001	-2862
-0.146487	-0.0417182	-2868
-0.0781196	-0.0638554	-2872
0.306639	-0.0941628	-2856
0.253481	0.0132677	-2848
0.219008	0.0237537	-2848
0.0994087	0.00731835	-2850
0.285295	0.0797882	-2856
0.166516	0.0188238	-2854
0.201632	0.0690765	-2854
0.170522	-0.0461093	-2866
0.234167	0.0254941	-2868
0.0848106	0.00711446	-2868
0.0902795	-0.00114326	-2868
0.190268	0.027118	-2874
0.183806	-0.00439829	-2878
0.297837	-0.031793	-2878
0.302868	-0.0509445	-2886
0.218792	0.00800285	-2884
0.264691	-0.0631854	-2884
0.119414	0.0142508	-2884
0.209446	0.098816	-2882
0.144419	0.0836986	-2882
0.276888	0.103222	-2860
0.122667	0.127609	-2844
0.118865	0.107132	-2846
0.282042	0.230197	-2866
0.179818	0.154952	-2852
-0.193544	0.176586	-2626
-0.258513	0.0243498	-2628
-0.145183	-0.101073	-2634
-0.153787	-0.110492	-2640
0.0381629	0.0196362	-2638
0.105801	0.0952304	-2618
0.0489157	0.0946107	-2620
0.227613	0.231452	-2624
0.172497	0.145044	-2626
0.115111	0.22561	-2630
0.295317	0.0813921	-2628
0.319479	0.0491052	-2640
0.179796	0.0807725	-2622
0.25058	-0.186795	-2620
0.185073	-0.0514805	-2634
0.225367	-0.0684685	-2638
0.335648	-0.0540696	-2646
0.26519	0.0210746	-2646
0.234836	0.0694219	-2400
0.209167	-0.0519581	-3538
0.0161705	-0.0876702	-3542
0.411332	0.101572	-3506
0.322827	-0.140604	-3524
0.0828626	0.149352	-3530
0.271347	-0.00935438	-3520
0.238335	-0.0422362	-3540
0.18642	0.0993773	-3524
0.187829	0.0878966	-3030
0.334152	-0.0399216	-3054
-0.194627	-0.186784	-3050
-0.06245	-0.15869	-3036
0.19296	0.188755	-3034
0.116022	0.14352	-3036
0.0831569	0.205433	-3038
0.196426	0.192251	-3046
0.045143	0.0278353	-3038
0.149818	-0.0250348	-3058
0.170635	-0.127246	-3044
0.082709	0.0550698	-3040
0.0946825	0.18892	-3044
0.202635	-0.0456761	-3062
0.109847	0.215992	-3062
-0.155995	-0.151684	-3050
0.156834	-0.0349582	-3048
0.161683	-0.0780929	-3028
0.251555	0.120261	-2540
0.281524	-0.109439	-2540
0.207377	0.18015	-2540
0.0931631	0.185398	-2540
0.172545	0.115564	-2540
0.329495	-0.0380281	-2540
0.206232	0.0349062	-2540
0.250862	0.00443761	-2540
0.300523	-0.250468	-2540
0.249809	-0.00860396	-2540
0.0373167	0.180486	-2540
-0.0776896	-0.135912	-2544
-0.14368	-0.151325	-2542
0.273722	0.0542341	-2542
0.215482	-0.0106219	-2524
0.215982	0.0597984	-2524
0.257416	0.0735287	-2518
0.125695	0.04393	-2508
0.115195	0.0444023	-2510
0.164267	0.065251	-2510
0.279907	0.114625	-2522
0.208133	0.0968731	-2522
0.128259	0.0381614	-2522
0.0784996	0.1198	-2528
0.274802	0.141334	-2536
0.34542	-0.015272	-2536
0.267233	0.0273608	-2536
0.162909	-0.010127	-2538
-0.10105	-0.165038	-2544
-0.207449	-0.189375	-2544
0.134411	0.0443667	-2548
0.283416	0.051261	-2508
-0.147982	-0.0770672	-2514
0.0964907	0.223641	-2522
0.184163	0.0562744	-2522
-0.191925	-0.00150175	-2807.05
-0.194045	-0.150467	-2807.23
-0.0628947	-0.182415	-2809.8
0.252359	0.0985867	-2808.85
0.351751	-0.14919	-2724.73
0.259588	0.0904748	-2722.75
0.211652	0.339387	-2720.25
-0.115066	-0.168087	-2635.06
-0.0900786	-0.103586	-2639.94
-0.183768	-0.0951375	-2645.79
-0.0814521	0.0923446	-2657.84
-0.0897866	0.136442	-2656.16
0.0640799	0.104914	-2644.45
0.260787	0.218988	-2641.5
-0.0518958	0.183096	-2657.59
0.190371	0.169842	-2644.73
0.231011	0.268269	-2646.84
-0.181718	-0.349054	-2546.27
0.14769	0.103638	-2563.84
0.353566	-0.156967	-2592.4
-0.112998	-0.168482	-2459.03
-0.0871767	-0.126616	-2460.52
0.323018	-0.303293	-2516.61
0.174796	0.119329	-2487.73
0.183945	0.110415	-2400.65
0.128641	0.0770899	-2403.95
0.247914	0.178032	-4018
0.218567	0.139915	-3550
0.280407	0.181728	-3552
0.299378	-0.0542157	-3556
-0.145447	-0.12622	-3536
0.237346	0.0862631	-3058
0.272991	-0.0142422	-2598
0.204225	-0.0151709	-2578
0.194636	0.147964	-2576
0.23547	0.184974	-2588
0.221186	0.186636	-4548
0.0552756	0.00456942	-4032
0.0941774	0.187651	-4038
0.189491	0.162171	-4040
0.161572	-0.0670244	-4046
0.236242	0.249346	-4052
0.163488	0.0208759	-4030
0.13569	0.0387001	-4040
0.245483	0.0330684	-4040
0.167879	0.0930117	-4048
0.220223	0.206757	-4050
-0.057827	-0.0875879	-4058
-0.173853	-0.102279	-4058
-0.153707	-0.165315	-4060
-0.189284	-0.0826084	-3560
-0.147389	-0.122058	-3572
-0.207421	-0.12991	-3560
0.29997	0.02586	-3566
0.309295	-0.0677005	-3562
0.223464	-0.00465441	-3572
0.24816	0.111932	-3578
0.254976	0.0239412	-3590
0.208728	0.0539735	-3076
0.203597	-0.0599071	-3076
0.250858	0.120749	-3090
-0.226878	-0.0346146	-3088
-0.189132	-0.0233503	-3098
0.303258	-0.0666956	-3102
0.308023	-0.0454566	-3098
0.223358	0.180286	-3102
0.176833	0.305026	-3088
0.263994	0.0973386	-3088
0.18222	0.125676	-3078
0.0449788	0.030909	-3074
-0.0731432	-0.0693913	-3078
-0.139242	0.0384077	-3076
-0.057423	-0.0849764	-3074
-0.24829	0.0296592	-3076
0.302263	0.175185	-3070
0.297878	0.0923073	-3070
0.151671	0.0954038	-3070
0.275932	-0.056996	-3066
0.181017	0.238467	-3080
0.246891	0.139174	-2608
0.302226	0.152847	-2598
0.291812	0.0395456	-2612
0.243832	0.262372	-2614
0.151686	-0.0174504	-2620
0.12126	0.00965323	-2616
0.326673	-0.037503	-2592
0.237389	0.116053	-2590
0.153693	0.122395	-2590
0.292834	-0.011901	-2592
0.197259	0.166418	-2590
-0.156535	0.211376	-2598
0.148301	0.00923518	-2598
-0.0459062	-0.0972766	-2600
0.0808054	0.0641475	-2602
-0.173136	-0.12907	-2602
-0.0605351	-0.112986	-2608
0.340281	-0.0386239	-2606
0.30106	0.00162083	-2608
0.352621	0.128197	-2612
0.285232	0.10034	-2614
0.271788	0.0833393	-2616
0.266221	-0.00687518	-2616
0.229242	0.0262539	-2620
0.209207	0.0798393	-2618
0.192242	-0.0244194	-2610
0.216363	0.191882	-2602
0.187792	0.125071	-2616
0.361868	-0.147897	-2789.86
0.340567	-0.0064503	-2789.37
0.406303	-0.188244	-2782.85
0.261048	0.0339405	-2783.93
0.291612	0.194408	-2783.47
0.270716	0.193791	-2782.99
0.267008	0.207829	-2784.04
0.19773	0.0319157	-2787.64
0.152317	0.110345	-2790.34
0.117288	0.076992	-2789.61
0.0692393	0.0536697	-2791.93
0.181427	0.0915813	-2784.98
0.159776	0.0808439	-2787.02
0.157961	0.120665	-2786.66
0.125808	0.123719	-2786.87
0.11486	0.110281	-2788.03
0.104443	0.0910162	-2786.95
0.0737525	0.112903	-2788.91
0.0579262	0.212548	-2788.56
0.060404	0.0836478	-2786.37
-0.00866768	0.0776271	-2788.64
-0.214651	-0.223256	-2798.91
-0.226603	-0.239662	-2797.63
-0.145738	-0.203442	-2803.86
-0.147538	-0.19196	-2803.81
-0.176589	-0.195168	-2802.69
-0.215155	-0.0114987	-2800.84
-0.178915	-0.162647	-2798.29
-0.187807	0.0432609	-2794.38
-0.223846	0.0310338	-2793.68
-0.0521916	0.0796149	-2796.36
-0.0816897	0.18311	-2797.01
-0.196563	0.217697	-2794.89
-0.25504	-0.318042	-2800.92
-0.347673	-0.0589509	-2800.18
-0.251976	0.157065	-2800.16
-0.255942	0.12101	-2799.24
-0.291969	0.09391	-2801.1
-0.269561	0.113959	-2799.29
-0.290769	0.107843	-2798.68
0.364638	-0.251715	-2718.38
0.367413	-0.181053	-2718.38
0.2909	0.0135224	-2718.38
0.236906	0.0559511	-2718.38
0.384197	-0.175618	-2711.52
0.272425	-0.023467	-2710.17
0.261242	0.0281113	-2709.65
0.211031	0.0377744	-2709.82
0.387294	0.0697932	-2718.38
0.367913	0.102111	-2718.38
0.335706	0.095982	-2718.38
0.280237	0.129908	-2718.38
0.26628	0.109037	-2718.38
0.260569	0.0599036	-2718.38
0.227062	0.06961	-2718.38
0.298793	0.103423	-2714.3
0.293998	0.134968	-2715.62
0.271165	0.102881	-2715.69
0.267739	0.131034	-2716.03
0.301282	0.0733187	-2711.18
0.0879167	0.0338103	-2718.38
0.0872749	0.026977	-2718.38
0.0769344	0.0354809	-2718.38
0.0503665	0.0306116	-2712.43
0.125743	0.165643	-2718.38
0.0304591	0.107598	-2718.38
0.0162517	0.114454	-2718.38
0.0120993	0.126027	-2718.38
0.00573425	0.0592595	-2718.38
-0.0233198	0.279568	-2718.38
0.106432	0.0862695	-2713.89
0.0950024	0.101377	-2714.04
0.0887217	0.182761	-2711.29
0.124207	0.0897741	-2708.94
-0.02156	0.295692	-2718.38
-0.21899	-0.0496133	-2718.38
-0.121364	-0.113459	-2708.7
-0.0522774	0.0740447	-2718.38
-0.0690886	0.157792	-2718.38
-0.0723443	0.163784	-2718.38
-0.103941	0.110177	-2718.38
-0.176062	0.186867	-2718.38
-0.189938	0.18076	-2718.38
-0.20714	0.173331	-2718.38
-0.0807712	0.0748595	-2711.92
-0.144844	0.0945882	-2708.24
-0.310113	-0.252081	-2712.82
-0.279031	0.0130032	-2709.84
0.319729	-0.248634	-2638.38
0.382038	-0.114291	-2638.38
0.316982	0.0450746	-2638.38
0.301233	0.083318	-2638.38
0.285341	0.0763245	-2638.38
0.340084	-0.0300899	-2636.44
0.224696	0.0159198	-2633.81
0.235664	0.139311	-2638.38
0.213797	0.138271	-2638.38
0.24463	0.199673	-2633.83
0.19854	0.0673755	-2638.38
0.16691	0.0362078	-2638.38
0.115916	0.0786422	-2638.38
0.0508099	0.0366149	-2638.38
0.136962	0.118466	-2638.38
0.126325	0.103217	-2638.38
0.0593271	0.106326	-2638.38
0.045696	0.176817	-2638.38
0.0333229	0.128025	-2638.38
0.0282234	0.154736	-2638.38
0.0209662	0.133	-2638.38
0.119417	0.161797	-2633.62
0.0969365	0.103203	-2635.84
0.0785035	0.259191	-2633.59
0.0473142	0.1424	-2635.97
-0.07729	-0.187237	-2638.38
-0.140525	-0.184331	-2635.63
-0.0764121	-0.0817953	-2638.38
-0.0978594	-0.136343	-2638.38
-0.170712	-0.0858393	-2638.38
-0.0630515	-0.128719	-2635.41
-0.217039	0.0444657	-2632.15
-0.0408768	0.233423	-2638.38
-0.0524733	0.135216	-2638.38
-0.228324	-0.0841673	-2638.38
-0.308425	0.000337861	-2638.38
0.243124	-0.251927	-2558.38
0.303785	-0.281273	-2556.46
0.234382	-0.0407009	-2558.38
0.283124	-0.146573	-2551.58
0.302403	-0.0541133	-2547.65
0.255603	0.0323809	-2547.8
0.33661	0.159661	-2554.86
0.247602	0.131344	-2549.62
0.211509	0.0384238	-2558.38
0.201545	0.0260471	-2550.9
0.0332014	0.0405279	-2552.8
0.169482	0.0263352	-2549.69
0.0620628	0.0519206	-2548.47
0.150815	0.0949501	-2550.64
0.138666	0.197526	-2553.34
0.119664	0.204154	-2552.69
0.0586591	0.0720696	-2550.8
0.121463	0.133424	-2548.75
0.097693	0.0739825	-2547.15
-0.0988177	-0.132761	-2558.38
-0.107956	0.0448914	-2555.32
-0.0243581	0.0111177	-2548.9
-0.0779806	-0.0938459	-2549.52
-0.0469021	0.104904	-2555.74
-0.0644573	0.106167	-2556.7
-0.230704	-0.243352	-2550.18
-0.244359	-0.128593	-2558.38
0.075814	0.0508801	-2546.85
0.258657	-0.262011	-2475.36
0.348335	-0.15442	-2478.38
0.329152	0.0446089	-2478.38
0.320752	0.0651184	-2478.38
0.288473	-0.0126956	-2478.38
0.250414	-0.0562697	-2478.38
0.244468	0.0203319	-2478.38
0.339038	-0.0236139	-2476.66
0.303134	-0.164399	-2475.93
0.220961	0.029182	-2472.89
0.21863	0.141677	-2478.38
0.254753	0.0860799	-2471.94
0.198906	-0.263214	-2475.31
0.169335	0.0702923	-2478.38
0.135401	0.0444119	-2478.38
0.0417322	0.0772263	-2478.38
0.150196	0.0164751	-2474.89
0.0637483	-0.00733369	-2474.11
0.171	0.0551958	-2472.42
0.162815	0.0454534	-2472.89
0.127713	0.0626092	-2472.67
0.0638014	0.0467214	-2470.42
0.124649	0.0391295	-2469.24
0.0912655	0.0635102	-2469.09
0.208689	0.142871	-2478.38
0.196089	0.136197	-2478.38
0.179065	0.0946427	-2478.38
0.147564	0.0821984	-2478.38
0.09501	0.100523	-2478.38
0.0581811	0.101318	-2478.38
0.156229	0.200308	-2475.62
0.118212	0.217063	-2474.5
0.0245663	0.175075	-2476.59
0.174161	0.170986	-2471.14
0.163564	0.136614	-2471.57
0.151457	0.227834	-2472.95
0.0829699	0.125211	-2471.82
0.038217	0.104974	-2471.75
0.187755	0.287357	-2469.55
0.0835898	0.080845	-2469.14
-0.00992215	0.070269	-2478.38
-0.0154902	-0.16882	-2467.38
-0.0289824	0.008424	-2467.98
-0.0987885	-0.113105	-2468.56
-0.135239	0.0563548	-2469.54
0.00462775	0.154828	-2472.04
-0.219864	0.0763122	-2467.13
-0.215881	-0.363567	-2462.18
-0.262356	-0.317447	-2462.18
-0.254319	-0.170567	-2466.79
-0.372793	0.0920377	-2463.92
-0.250628	0.0903116	-2462.18
-0.152801	-0.208785	-2794.03
0.154461	-0.227727	-2787.58
0.266601	-0.168055	-2788.57
0.244601	-0.14558	-2788.62
0.218001	-0.134669	-2798.37
0.315459	-0.23506	-2795.03
0.297134	-0.0860568	-2796.35
0.363299	-0.0935338	-2794.49
0.354893	-0.0518911	-2797.32
0.292076	-0.0519175	-2790.33
0.29017	-0.0172362	-2790.13
0.283432	0.0354697	-2787.93
0.207199	-0.0705474	-2793.27
0.228208	-0.013076	-2792.88
0.201412	0.0453446	-2792.45
0.188273	-0.0132084	-2798.33
0.166239	-0.116637	-2790.07
0.116512	0.111959	-2791.16
0.11806	0.154019	-2790.28
0.110091	0.221029	-2791.08
0.141298	0.165048	-2797.08
0.07398	0.0413244	-2797.77
0.0463576	-0.0618409	-2796.69
0.262015	0.187692	-2789.52
0.270741	0.122646	-2795.51
0.236922	0.122256	-2798.38
0.240256	0.097566	-2792.61
0.227275	0.0475607	-2786.95
0.204562	0.130704	-2791.55
0.320391	0.235601	-2790.39
0.1206	0.0910769	-2785.12
0.127632	0.0472889	-2789.12
0.256148	0.226744	-2796.43
0.213022	0.0108849	-2789.23
0.371404	-0.181009	-2793.53
0.328482	0.00380087	-2796.43
-0.254496	0.176837	-2712.24
-0.273136	0.022124	-2704.43
-0.171579	-0.00243444	-2705.5
-0.102406	-0.0725777	-2712.33
-0.109741	-0.117154	-2709.6
-0.124645	-0.183082	-2715.05
0.0431466	0.00990509	-2718.07
0.0247602	0.126641	-2706.82
0.163301	0.205489	-2709.86
0.153301	0.249543	-2709.74
0.139918	0.319838	-2707.72
0.296165	0.2359	-2712.53
0.30831	0.145302	-2717.95
0.232725	0.157001	-2708.57
0.219295	0.181399	-2711.06
0.208631	0.14646	-2714.92
0.200903	0.12694	-2710.72
0.247478	0.104097	-2707.52
0.264963	0.100684	-2708.18
0.272095	0.0406403	-2709.24
0.237159	0.0310035	-2710.16
0.245918	0.0125344	-2718.15
0.213635	-0.0769073	-2705.92
0.280522	-0.142098	-2715.16
0.287473	-0.117443	-2711.39
0.320772	-0.0320256	-2713.96
0.342949	-0.0272572	-2715.7
0.360058	-0.14361	-2706.82
0.328225	-0.161069	-2716.81
0.365882	-0.321929	-2717.31
0.211469	-0.235354	-2708.18
-0.0950664	-0.112355	-2628.66
-0.0821953	-0.10457	-2625.42
-0.0735099	-0.0292375	-2625.42
-0.0603327	-0.124279	-2631.9
-0.119441	-0.178948	-2625.42
-0.0813091	-0.189763	-2628.66
-0.175735	-0.232769	-2628.66
-0.254545	-0.264788	-2628.66
0.318928	-0.0435944	-2631.9
0.305549	-0.0416037	-2628.66
0.331552	-0.00614759	-2635.14
0.356328	-0.0611788	-2631.9
0.362421	-0.0868659	-2635.14
0.325053	-0.0977987	-2631.9
0.313193	-0.1649	-2631.9
0.259905	-0.188875	-2635.14
0.195016	-0.124005	-2631.9
0.188731	0.00196341	-2631.9
0.25925	0.0831381	-2631.9
0.301962	0.0647082	-2628.66
0.217925	0.0545974	-2628.66
0.165743	0.113063	-2628.66
0.196432	0.137935	-2635.14
0.236372	0.174541	-2635.14
0.145598	0.178697	-2631.9
0.090303	0.158852	-2635.14
0.0509413	0.158695	-2635.14
0.0617945	0.0610921	-2628.66
0.163283	0.298847	-2628.66
0.159864	0.0747445	-2631.9
0.124779	-0.0267746	-2635.14
0.220866	-0.0479684	-2631.9
0.140714	0.252531	-2628.66
0.131776	0.360061	-2628.66
-0.130819	-0.160069	-2545.42
-0.129116	-0.180903	-2551.9
0.0563506	-0.137947	-2548.66
0.184249	-0.07406	-2548.66
0.262214	-0.248402	-2548.66
0.299266	-0.343804	-2545.42
0.233329	-0.392058	-2545.42
0.202772	-0.344871	-2551.9
0.29093	-0.035601	-2548.66
0.341986	0.00519384	-2545.42
0.348891	-0.0643462	-2545.42
0.302868	0.159106	-2545.42
0.263875	0.131339	-2545.42
0.262122	0.0630525	-2545.42
0.243378	0.0662167	-2551.9
0.245679	0.149286	-2551.9
0.192801	0.128	-2551.9
0.178069	0.154127	-2548.66
0.17448	0.208386	-2548.66
0.11811	0.158265	-2548.66
0.138373	-0.029203	-2548.66
0.169612	-0.0115817	-2551.9
0.219118	-0.00773323	-2542.18
0.0546873	0.0399878	-2551.9
0.0182639	0.0445095	-2548.66
0.0842224	0.197342	-2548.66
0.143626	0.281233	-2548.66
0.137243	0.358835	-2551.9
0.0708455	0.309366	-2545.42
0.0893472	0.263405	-2545.42
0.103419	0.297765	-2545.42
0.312677	-0.113631	-2548.66
0.0853832	0.0275465	-2545.42
0.117639	0.259593	-2545.42
0.15725	0.331949	-2555.14
0.306545	0.0196414	-2545.42
0.223778	-0.265941	-2545.42
0.0337755	0.292297	-2551.9
0.286584	-0.376257	-2462.18
0.258515	-0.247272	-2468.66
0.246945	-0.211405	-2462.18
0.350879	-0.0631864	-2468.66
0.261352	-0.0553299	-2468.66
0.360041	-0.143198	-2462.18
0.18852	-0.0956652	-2468.66
0.156692	-0.0469823	-2465.42
0.131743	-0.0125919	-2465.42
-0.0741659	0.0918234	-2465.42
-0.1187	-0.105371	-2465.42
-0.145171	-0.158714	-2465.42
0.12185	0.0473334	-2468.66
0.136713	0.0670187	-2468.66
0.167769	0.0253715	-2468.66
0.202615	0.011979	-2468.66
0.222293	0.0113264	-2465.42
0.221646	0.0453239	-2465.42
0.209126	0.0547312	-2468.66
0.271917	0.048005	-2465.42
0.227238	0.0983247	-2468.66
0.259674	0.0797143	-2465.42
0.26092	0.1505	-2462.18
0.280772	0.164448	-2462.18
0.247781	0.1845	-2465.42
0.230561	0.217605	-2465.42
0.206227	0.226041	-2465.42
0.181647	0.123779	-2465.42
0.165591	0.135914	-2465.42
0.161573	0.190136	-2465.42
0.128579	0.133368	-2465.42
0.113923	0.160583	-2462.18
0.0752529	0.158744	-2462.18
0.097864	0.129568	-2468.66
0.279489	0.228826	-2462.18
0.1361	0.288401	-2468.66
0.135418	0.379296	-2462.18
0.224407	0.245036	-2465.42
