# Supplementary material for: Spinal premotor interneurons controlling antagonistic muscles are spatially intermingled
Source: eLife. 2022 Dec 13;11:e81976. doi: 10.7554/eLife.81976 (PMC9844990; doi:10.7554/eLife.81976)
Supplement: Figure 3—figure supplement 1—source data 2. [file elife-81976-fig3-figsupp1-data2.xlsx]

## Sheet: Sheet1
0.181313	0.0773374	-2372
0.149761	0.0927941	-2368
0.235827	0.0977331	-2370
0.210676	0.0514786	-2376
0.165525	0.0211586	-2386
0.190808	0.0421649	-2388
0.096141	0.197561	-2386
0.302858	-0.151525	-2390
0.145314	0.0158204	-2392
0.265943	-0.0761725	-2398
0.292763	-0.166555	-2146
-0.203027	0.102364	-2162
0.169393	-0.0574373	-2160
0.216198	0.13404	-1900
0.254461	0.125955	-1910
0.228687	0.0314828	-1912
0.23962	-0.0818721	-1890
0.280892	-0.0983708	-1898
-0.161186	-0.103612	-1902
0.153826	0.000710113	-1904
0.2769	-0.00197702	-1914
0.173201	0.080501	-1918
0.218108	0.123172	-1914
-0.153738	-0.0364302	-1922
-0.135755	0.0749312	-1922
0.117581	0.129707	-1906
-0.166294	-0.0921904	-1914
0.128202	0.0662109	-1654
0.242694	-0.120222	-1672
0.230682	0.0158906	-1676
0.240235	0.0451227	-1684
0.189612	-0.0136477	-1664
-0.141333	-0.0700063	-1670
-0.104572	-0.0708493	-1670
0.119757	0.183956	-1672
0.146224	0.0491947	-1682
0.183714	0.0924558	-1652
0.225264	-0.112529	-1654
-0.169772	-0.0994209	-1656
0.205176	0.117804	-1650
0.287201	0.0747656	-1664
0.102276	-0.017591	-1672
0.318199	0.0331558	-1666
0.213281	-0.102293	-1678
0.224034	0.0380232	-1684
0.190426	0.0070312	-2378
0.317442	0.0553733	-2370
0.279691	-0.241816	-2374
-0.0992001	-0.149269	-2386
0.25196	0.111469	-2390
0.100889	0.0744147	-2400
0.196495	0.117485	-2372
0.0835844	0.152093	-2170
0.210599	0.12691	-2174
0.264992	0.229005	-2182
0.196335	0.0855981	-2194
0.379933	-0.0400089	-2200
0.255774	-0.071522	-2206
0.275262	0.170283	-2212
0.27028	0.137687	-2212
0.0979203	0.164012	-2172
-0.147672	-0.204803	-2178
0.0242968	0.00204265	-2194
0.18226	0.116491	-2192
0.232963	0.140308	-1894
0.267918	-0.25276	-1912
0.232681	0.164326	-1910
0.305873	-0.167934	-1906
-0.235761	-0.0477326	-1896
-0.0796358	-0.118979	-1610
-0.179969	-0.174615	-1614
0.233902	0.159351	-1618
0.187696	0.0448425	-1622
0.178979	0.06209	-1630
0.129824	0.0783277	-1640
0.381923	0.189994	-1608
-0.142381	-0.0707813	-1616
-0.188105	-0.10302	-1618
0.0554213	0.01101	-1618
0.182116	0.0189917	-1624
0.0386854	-0.0831155	-1636
-0.171654	-0.0932838	-1638
-0.218601	-0.143851	-1608
-0.16641	-0.120483	-1612
0.314223	0.248858	-1614
0.308922	0.130733	-1614
0.0632412	0.105372	-1620
0.0217418	0.0424587	-1624
0.106714	0.0137988	-1628
0.182693	-0.0328563	-1634
-0.113843	-0.00559323	-1638
0.158564	0.16243	-1640
0.289092	0.0125206	-1636
0.338199	-0.0667883	-1642
-0.0738111	-0.149477	-2366
-0.0104174	-0.0926093	-2368
0.235739	0.115944	-2370
-0.124071	-0.0837422	-2378
0.0267432	-0.00263057	-2386
0.234836	0.0694219	-2400
0.0648059	0.0281994	-2132
0.0911265	0.214796	-2130
0.15641	0.157143	-2128
0.171207	0.0909473	-2134
0.15237	0.156232	-2136
0.204103	0.203444	-2140
0.17093	0.210935	-2148
0.154439	0.119511	-2142
0.12066	0.10504	-2142
0.0611668	0.0362724	-2144
0.169134	0.0468332	-2150
0.251786	0.0880671	-2154
0.185697	0.118061	-2152
0.111534	0.141383	-2158
0.28944	0.0557191	-2160
0.18155	0.105811	-2164
0.145718	0.0593421	-2164
0.187997	-0.0358239	-2138
0.223936	-0.0196569	-2138
0.155722	-0.0382416	-2138
0.205366	-0.15762	-2138
0.243825	-0.0151789	-2138
0.165849	-0.00686064	-2138
0.244508	-0.0429158	-2138
0.296846	-0.0473027	-2138
0.196892	-0.0997071	-2138
0.221421	-0.0355786	-2138
-0.0950531	-0.0822787	-2180
-0.131429	-0.102805	-2190
0.145241	0.111746	-2154
0.139411	0.157927	-1890
0.274932	0.243559	-1894
0.215129	0.171882	-1896
0.0760014	0.0776821	-1896
0.246606	0.0822093	-1896
0.142196	0.121323	-1890
0.233251	0.0817965	-1898
0.275074	0.0842332	-1896
0.217336	0.214205	-1912
0.170871	0.192521	-1914
0.190366	0.203253	-1916
0.304376	0.259311	-1916
0.253155	0.113294	-1912
0.300976	0.128507	-1910
0.109995	0.236368	-1914
0.238831	0.176622	-1914
0.109837	0.0866766	-1912
0.154656	0.164765	-1904
0.0710651	0.211442	-1902
0.180117	0.0959308	-1902
0.30387	0.121583	-1914
0.196332	0.171303	-1912
0.186508	0.033921	-1892
0.194033	0.00917431	-1892
0.340587	-0.0494467	-1896
0.208401	-0.0577689	-1894
0.333117	0.00340874	-1898
0.273521	0.022756	-1898
0.169547	0.00719697	-1900
0.307525	-0.0355255	-1904
0.243451	-0.0241541	-1904
0.244878	-0.193979	-1904
0.273412	-0.102329	-1914
0.300584	-0.109333	-1914
0.319937	-0.0367372	-1914
0.273341	0.00426759	-1914
0.250229	0.0462777	-1910
0.351773	0.0808844	-1912
0.0754893	0.104439	-1892
0.0389406	0.078734	-1896
-0.0740836	0.171995	-1906
0.0526545	0.0263445	-1914
0.00600427	0.100485	-1914
-0.225629	0.0425227	-1890
-0.130018	-0.0914169	-1898
-0.166839	-0.172481	-1898
-0.17553	-0.101863	-1900
-0.076263	-0.098261	-1912
-0.238959	0.204874	-1682
-0.260213	0.221601	-1654
-0.301065	-0.0019564	-1654
-0.116189	-0.13033	-1652
-0.102257	-0.198513	-1656
-0.0802414	-0.110148	-1654
-0.115361	-0.115872	-1662
-0.0946444	-0.171858	-1670
-0.0673346	-0.141236	-1680
-0.141503	-0.0999709	-1682
0.291299	0.277275	-1656
0.290323	0.172961	-1670
0.329932	0.15593	-1660
0.337555	0.157553	-1670
0.259588	0.179379	-1664
0.250469	0.201544	-1662
0.221926	0.153716	-1658
0.234279	0.170034	-1678
0.265233	0.13239	-1674
0.201686	0.13298	-1676
0.0850972	0.191936	-1652
0.0943923	0.182348	-1652
0.206174	0.134541	-1650
0.217569	0.133729	-1654
0.0847026	0.144594	-1654
0.317096	0.16268	-1656
0.124662	0.132397	-1670
0.123401	0.171407	-1670
0.198491	0.12009	-1670
0.0438009	0.160113	-1674
0.162039	0.142859	-1672
0.121614	0.00334392	-1658
0.23304	-0.0576792	-1658
0.194073	0.0395374	-1658
0.170786	0.00653522	-1658
0.132318	0.0651718	-1658
0.232026	-0.0295958	-1652
0.226091	-0.0169902	-1652
0.257796	-0.0264531	-1652
0.267382	-0.0195502	-1652
0.278535	-0.0182667	-1652
0.308497	0.0510954	-1652
0.322955	-0.0581649	-1652
0.26189	-0.094282	-1652
0.229193	-0.121928	-1652
0.197301	0.104168	-1652
0.320527	-0.0205076	-1678
0.248057	0.125238	-1682
0.249488	0.11275	-1682
0.347864	-0.0336821	-1676
0.302468	-0.0432976	-1674
0.331554	0.0328773	-1650
0.221273	0.0164074	-1670
0.33128	0.0529131	-1652
0.340043	-0.121942	-1682
-0.240357	0.216072	-1676
0.224194	0.00954374	-2060
0.263454	-0.376105	-2377.45
0.301378	-0.191714	-2369.52
0.320662	0.00396084	-2376.93
0.19981	0.0860098	-2388.12
0.228244	0.0728401	-2384.99
0.342529	0.0629444	-2377.79
0.368796	0.0718915	-2372.57
0.370664	0.080138	-2376.12
0.358072	0.0706771	-2373.46
0.3298	0.166577	-2380.47
0.199084	0.258784	-2396.33
-0.191159	-0.315009	-2294.21
-0.110292	-0.272809	-2297.67
-0.215217	-0.245173	-2304.47
0.179271	0.0666865	-2326.86
0.296123	0.0792056	-2344.26
0.37225	-0.197065	-2307.89
-0.212273	-0.128007	-2219.6
-0.206967	-0.250351	-2227.19
-0.168003	-0.227323	-2235.18
-0.0736429	0.121607	-2235.68
0.188464	0.11399	-2264.25
0.205587	0.111894	-2269.68
0.164038	0.138334	-2261.2
0.280998	0.086234	-2278.95
0.364094	0.122341	-2292.29
0.169173	0.0271552	-2262.19
0.136973	0.0368252	-2264.89
0.232136	-0.0203018	-2273.32
0.327249	-0.0102501	-2284.89
0.226053	-0.345345	-2273.25
0.33737	-0.32649	-2290.11
0.289855	0.167554	-2279.76
0.271165	0.181339	-2277.44
0.190262	0.0748596	-2274.59
0.283795	-0.152763	-2131.87
0.269781	-0.338868	-2131.06
0.183311	0.109743	-2136.39
0.319388	0.127205	-2121.05
0.29391	0.105254	-2132.18
0.354529	0.0548889	-2131.04
0.203254	0.0791983	-2129.93
0.14757	0.0996887	-2135.85
0.13665	0.101569	-2133.33
0.10644	0.240241	-2143.54
0.212062	0.244529	-2135.42
-0.156978	-0.284168	-2164.93
0.00375246	-0.0550928	-2081.94
0.132434	0.117872	-2082.27
0.0472007	0.0864215	-2081.05
0.32892	0.204013	-2084.89
-0.164199	-0.257499	-1999.63
-0.145131	-0.280591	-2000.01
-0.00890553	0.0961017	-2004.4
0.211861	0.182467	-2003.13
0.218098	0.186327	-2004.52
0.293155	0.241133	-2004.46
0.269759	0.0277084	-2004.9
0.225472	0.010153	-2004.69
0.265062	-0.381531	-2004.31
0.244056	-0.338551	-2006.05
0.225838	-0.127048	-2008.85
0.288526	0.123822	-2008.5
-0.212406	-0.264266	-1935.22
-0.152361	-0.163156	-1928.19
-0.00128414	-0.121225	-1925.63
0.216253	-0.123793	-1926.45
0.28985	-0.371127	-1931.17
0.22648	0.00137851	-1919.56
0.413165	0.0796411	-1916.98
0.154683	0.144777	-1912.21
0.203104	0.162976	-1910.93
0.238686	0.228371	-1907.17
0.278209	0.230376	-1906.83
0.307698	0.215548	-1907.46
0.320632	0.228796	-1909.45
0.163583	0.0931919	-1914.95
0.317641	-0.144112	-1859.13
0.328684	-0.120683	-1859.32
0.339379	-0.252817	-1864.63
0.302122	-0.316259	-1860.98
0.190358	0.0407807	-1849.81
0.166581	0.109117	-1852.69
0.142571	0.15623	-1844.91
0.183917	0.194451	-1846.09
0.256144	0.140459	-1853.6
0.04996	0.0448964	-1842.84
-0.132444	-0.242181	-1838.79
-0.164519	-0.36875	-1842.09
-0.092455	-0.218817	-1768.36
0.0839179	0.0766603	-1767.1
0.0920223	0.213075	-1764.85
0.0463668	0.207025	-1771.29
0.0911349	0.179643	-1768.16
0.112242	0.187917	-1762.11
0.119189	0.109902	-1763.2
0.177751	0.0559498	-1765.8
0.216687	0.00628405	-1768.67
0.334777	0.0258378	-1763.55
0.381287	0.145293	-1766.46
0.237645	0.214374	-1759.54
0.161495	-0.373956	-1767.91
0.215434	-0.374445	-1769.76
0.14158	0.277138	-1663.57
0.190449	0.291423	-1662.24
0.294347	0.277833	-1662.03
0.273487	0.231975	-1667.74
0.251057	0.200749	-1672.59
0.193193	0.216554	-1675
0.238994	0.151511	-1675.63
0.263389	0.114684	-1674.79
0.228629	0.0703847	-1677.76
0.203155	0.0554766	-1678.89
-0.108956	0.0169902	-1684.34
-0.152946	-0.221763	-1701.88
0.297195	-0.325327	-1612.19
0.230963	-0.381248	-1615.19
0.332732	-0.370535	-1616.52
0.270038	-0.296526	-1611.24
-0.131253	-0.235301	-1614.36
-0.152663	-0.185135	-1614.84
-0.179139	-0.100694	-1608.09
-0.104721	-0.231343	-1613.91
-0.235609	0.174052	-2110
0.200096	0.22469	-2090
0.221719	-0.00240101	-2122
-0.126194	-0.134835	-2122
-0.126717	-0.140318	-2098
0.113392	0.202064	-2102
0.164406	0.0338548	-2124
0.194931	-0.0289154	-1618
0.125668	0.241753	-2120
0.249573	0.0156473	-2124
0.29599	0.0880771	-2126
0.33025	0.159394	-2122
0.316752	0.132035	-2132
0.190882	0.171568	-2132
0.275848	0.079207	-2136
0.202993	0.0279816	-2134
0.0762007	0.0958339	-2136
0.347282	-0.102344	-2144
0.264255	-0.0645928	-2122
-0.196115	-0.087314	-2112
-0.218927	-0.17185	-2130
-0.13197	-0.0858546	-2142
-0.28664	0.0515191	-2108
-0.149881	-0.0796796	-2112
-0.0671939	-0.116777	-2112
-0.0690223	-0.145604	-2112
-0.170229	-0.0459246	-2114
-0.160462	0.027729	-2116
-0.104338	-0.0307263	-2116
0.031577	0.0236018	-2118
-0.182496	-0.214582	-2120
-0.0836371	0.188893	-2120
-0.0311523	0.156511	-2124
0.307082	0.0363992	-2122
0.258048	0.0280114	-2124
0.300648	0.0731749	-2126
0.253878	0.0821198	-2128
0.122321	0.115388	-2126
0.0784411	0.129268	-2128
0.0663564	0.191953	-2136
0.236332	0.161525	-2138
0.174806	0.144812	-2140
0.261521	0.12012	-2144
0.132383	0.228454	-2146
0.138251	0.208257	-2148
0.220113	0.169599	-2150
0.179194	0.163573	-2150
0.184832	0.0885302	-2156
0.106591	0.158904	-2154
0.0857957	0.182749	-2154
0.0876712	0.111041	-2154
0.170441	0.111669	-2158
0.178403	0.0563132	-2156
0.12652	0.0670234	-2158
0.204389	0.131308	-2120
0.274302	0.0311735	-2120
0.276077	0.0548773	-2122
0.331741	0.0191372	-2124
0.260342	0.0437747	-2130
0.233578	0.0360853	-2140
0.250952	0.145926	-2116
0.178657	0.182231	-2110
0.170972	0.127511	-2116
0.126898	0.0559679	-2118
0.0745131	0.209207	-2120
0.0910094	0.16555	-2138
0.266287	0.0151905	-2132
0.289477	0.022519	-2108
0.26204	0.0340374	-2118
0.224253	0.146067	-2120
0.140498	0.192667	-2116
0.0383123	-0.101539	-2118
0.123324	0.0251397	-2124
0.24256	-0.0235312	-2130
0.230233	-0.027266	-2126
0.0577928	0.0159673	-2144
0.232657	-0.0913941	-2150
0.221912	-0.0415307	-2136
0.276856	-0.0474311	-1620
0.216975	-0.168908	-1626
0.319869	-0.0425978	-1634
0.274455	-0.0202749	-1640
0.322823	-0.0922965	-1648
0.283656	-0.0674785	-1652
0.325312	-0.0336922	-1648
0.263621	0.00395455	-1660
0.324245	-0.104788	-1658
0.279109	-0.0305379	-1646
0.263037	-0.0646695	-1624
-0.262143	0.00232622	-1626
-0.162166	-0.182686	-1628
-0.0730243	-0.173536	-1628
-0.133435	-0.156267	-1626
-0.180568	-0.0957398	-1626
-0.0871648	-0.0796388	-1634
-0.0635224	-0.0280788	-1636
-0.0588315	-0.130688	-1636
-0.114975	-0.176592	-1638
-0.183847	0.130341	-1636
0.227137	0.0813082	-1638
0.318088	0.0620416	-1636
0.225793	0.20634	-1626
0.13388	0.113976	-1642
0.102388	0.121	-1646
0.101734	0.147063	-1648
0.123614	0.235833	-1650
0.173169	0.141744	-1654
0.20249	0.145922	-1654
0.157485	0.0967159	-1652
0.0879806	0.116867	-1652
0.0808737	0.245749	-1650
0.312042	0.0970443	-1652
0.124294	0.210491	-1650
0.323715	0.161503	-1662
0.288803	0.0655537	-1666
0.217938	0.136389	-1666
0.293792	0.010135	-1664
0.305992	0.084802	-1662
0.267566	0.104935	-1664
0.287072	0.0572979	-1666
0.120686	0.0478289	-1640
0.136343	0.0584291	-1640
0.233098	0.130925	-1640
0.245487	0.124247	-1646
0.218801	0.0831965	-1666
0.169205	0.162635	-1626
0.126778	0.0816822	-1660
0.129591	0.104488	-1664
0.0903495	0.159132	-1656
0.298681	0.0726783	-1648
0.0855384	0.139445	-1648
0.216307	0.258894	-1642
0.193778	0.223299	-1640
0.234489	0.289765	-1642
0.113615	0.117369	-1640
0.235572	0.13618	-1636
0.172661	0.17256	-1638
0.346295	-0.138086	-1630
0.175407	0.00545521	-1632
0.38559	-0.104163	-1990.27
0.303174	-0.0923789	-1995.83
0.172212	0.214818	-1997.88
-0.106495	-0.216221	-1993.05
0.359042	-0.0270945	-1913.05
0.242585	-0.332651	-1913.05
0.198528	0.0599662	-1915.83
-0.21694	-0.184688	-1918.61
-0.283565	-0.165989	-1913.05
0.28648	0.0624062	-1913.05
0.361502	-0.0742246	-1913.05
0.438117	-0.145977	-1913.05
-0.304526	0.0813076	-1838.61
-0.141977	-0.170239	-1838.61
0.0968047	0.0630008	-1838.61
0.366113	-0.0775906	-1838.61
0.351432	0.0624066	-1833.05
0.230548	0.167898	-1758.61
0.247397	0.00692406	-1758.61
0.312201	-0.0827401	-1758.61
0.380613	-0.149099	-1758.61
0.423154	0.0148575	-1758.61
-0.182734	-0.17035	-1678.61
-0.220424	-0.25779	-1673.05
0.396385	0.0831717	-1664.71
0.30137	0.0509181	-1670.27
0.353974	-0.0696128	-1670.27
0.336249	-0.0633892	-1667.49
0.331587	-0.172308	-1670.27
0.293375	-0.0857894	-1673.05
0.202266	-0.276968	-1667.49
0.139885	0.0159885	-1673.05
0.131748	0.130991	-1600.16
0.378252	0.0700805	-2398.38
0.293702	0.00366733	-2398.38
0.270124	-0.0628158	-2398.38
0.24947	-0.0949694	-2398.38
0.330862	0.119156	-2398.38
0.276969	0.220665	-2398.38
0.208778	0.169437	-2398.38
0.203903	0.0906071	-2398.38
0.109338	-0.338468	-2398.38
0.0167511	-0.315574	-2398.38
0.0984203	-0.402447	-2394.54
0.170403	0.0262177	-2398.38
0.0166418	0.0587728	-2398.38
0.00645232	-0.0841857	-2394.59
0.161853	0.16593	-2398.38
0.161257	0.17605	-2398.38
0.148292	0.0934301	-2398.38
0.0439627	0.259711	-2398.38
0.0298452	0.121282	-2398.38
0.0117011	0.154861	-2398.38
0.178746	0.170869	-2396.56
0.0362593	0.150886	-2395.13
0.0759076	0.093652	-2391.97
0.0315668	0.0813888	-2391.38
0.0316567	0.0981074	-2393.03
-0.184393	-0.244082	-2393.16
-0.0893718	0.0493133	-2398.38
-0.0977862	0.00620868	-2393.91
-0.104607	0.0274693	-2395.34
-0.118512	-0.167308	-2394.38
-0.136854	-0.191304	-2394.07
-0.159001	-0.174429	-2394.45
-0.149122	-0.0343262	-2391.97
-0.164456	-0.0304064	-2391.14
-0.189112	-0.0409404	-2391.74
-0.0969012	-0.167889	-2388.68
-0.139113	-0.11938	-2387.93
-0.150057	-0.0135209	-2389.18
-0.109947	0.0887726	-2388.75
-0.231729	0.0437677	-2392.1
-0.269287	-0.248296	-2382.18
-0.263301	0.101327	-2383.97
0.332748	-0.439157	-2318.38
0.27347	-0.22774	-2318.38
0.251132	-0.335375	-2318.38
0.332033	0.0413703	-2318.38
0.316513	0.0111492	-2318.38
0.299526	-0.133299	-2318.38
0.29168	0.0051772	-2318.38
0.208912	0.052698	-2318.38
0.189642	-0.226202	-2314.12
0.243805	0.25704	-2318.38
0.236568	0.204375	-2318.38
0.209162	0.120011	-2318.38
0.140084	-0.0758032	-2318.38
0.120757	0.0567175	-2318.38
0.00684912	-0.150015	-2318.38
0.158723	0.08208	-2318.38
0.141302	0.103409	-2318.38
0.125279	0.250195	-2318.38
0.112644	0.265788	-2318.38
0.100345	0.221001	-2318.38
0.0353332	0.102597	-2318.38
0.0347995	0.113535	-2318.38
0.0135376	0.18454	-2318.38
0.113643	0.146869	-2314.91
0.0990749	0.241873	-2316.71
0.0670876	0.0794462	-2315.55
0.124921	0.288615	-2318.38
-0.174263	-0.226373	-2318.38
-0.25131	-0.212234	-2312.33
-0.11374	-0.0182084	-2318.38
-0.116067	-0.187587	-2318.38
-0.174669	-0.185938	-2312.17
-0.253838	0.0821496	-2309.8
-0.259269	-0.307308	-2313.42
-0.31629	-0.210703	-2312.06
-0.308097	-0.17164	-2311.5
-0.323672	-0.185411	-2312.23
0.272476	-0.231884	-2238.38
0.317547	0.0160673	-2238.38
0.299211	0.0276706	-2238.38
0.241423	0.0209771	-2238.38
0.220404	-0.0231594	-2238.38
0.217615	0.0642791	-2238.38
0.254245	-0.077161	-2234.69
0.245271	0.0051573	-2234.45
0.336531	0.164176	-2238.38
0.307784	0.165551	-2238.38
0.249894	0.17241	-2238.38
0.238492	0.246938	-2238.38
0.287095	0.114663	-2234.59
0.19963	-0.0292677	-2238.38
0.135007	0.0709534	-2238.38
0.126439	0.039651	-2238.38
0.0706519	0.0644797	-2238.38
0.0659398	0.076368	-2238.38
0.0513987	0.054203	-2238.38
0.179473	0.00062311	-2236.47
0.0303566	0.041652	-2234.55
0.0892852	0.0222219	-2232.01
0.183552	0.128756	-2238.38
0.163935	0.163953	-2238.38
0.0447977	0.0932486	-2238.38
0.184638	0.138566	-2234.4
0.162207	0.15556	-2234.76
0.168639	0.121369	-2232.73
-0.0210876	-0.196271	-2238.38
-0.141816	-0.24615	-2238.38
-0.15201	-0.269476	-2230.92
-0.136432	-0.189636	-2227.62
-0.0526247	0.0406439	-2238.38
-0.062854	0.0505555	-2238.38
-0.0918558	-0.0280843	-2232.09
0.00634433	0.120044	-2238.38
-0.192581	0.0480425	-2228.66
-0.213166	0.208215	-2235.14
-0.265607	0.0953516	-2228.39
0.356559	-0.0805118	-2151.06
0.251541	0.109114	-2153.69
0.262591	0.0396211	-2149.64
-0.00567598	-0.102113	-2152.41
0.165329	0.0872603	-2158.38
0.186238	0.174508	-2151.35
0.175071	0.196461	-2150.65
0.0325376	0.0503322	-2153.34
0.0300902	0.0728069	-2152.01
0.187093	0.139368	-2148.54
0.0700918	0.0453103	-2148.8
-0.0823262	-0.36564	-2152.53
-0.169824	-0.246514	-2152.35
-0.045658	-0.145187	-2153.57
-0.115171	-0.123885	-2151.31
-0.130255	-0.0641457	-2151.11
-0.163461	-0.0506048	-2151.87
-0.138827	-0.0778278	-2149.18
-0.10027	0.07556	-2151.06
-0.108271	0.0801912	-2150.54
-0.248884	0.198186	-2150.57
0.284756	-0.123847	-2145.06
0.260368	-0.0566196	-2144.15
0.178725	-0.0339654	-2145
0.0850113	-0.0483705	-2146.43
0.173078	0.214734	-2144.34
0.0887204	0.0627325	-2142.18
-0.0962779	0.0575143	-2146.48
-0.262232	0.0965121	-2144.19
0.218658	-0.356818	-2078.38
0.267566	-0.315985	-2076.02
0.270484	-0.21978	-2073.08
0.298332	-0.214212	-2067.8
0.31363	-0.186078	-2078.38
0.29988	-0.0248085	-2078.38
0.281554	-0.0539629	-2078.38
0.248993	-0.00366739	-2078.38
0.235132	0.0319102	-2078.38
0.284909	-0.0615163	-2073.05
0.194918	-0.0236596	-2072.53
0.248835	0.0552358	-2067.45
0.226612	0.112475	-2078.38
0.204451	0.120492	-2073.74
0.25256	0.164813	-2070.5
0.25683	0.256398	-2068.69
0.140035	-0.298765	-2078.38
0.061519	0.0527077	-2078.38
0.0579123	0.0159068	-2078.38
0.0452892	0.0178022	-2078.38
0.0356644	0.0412944	-2078.38
-0.00185616	0.0602746	-2078.38
-0.00326331	-0.0739038	-2076.42
0.126945	-0.00901197	-2071.23
0.163113	0.0544017	-2068.88
0.0891285	0.0335106	-2068.78
0.0557458	0.00854254	-2067.16
0.172452	0.141212	-2078.38
0.164762	0.122992	-2078.38
0.138124	0.102936	-2078.38
0.104863	0.136312	-2078.38
0.13103	0.122259	-2076.34
0.0763617	0.0978685	-2075.75
0.153561	0.102231	-2073.15
0.10551	0.232415	-2069.74
-0.156919	-0.289139	-2073.24
-0.151132	-0.16746	-2078.38
-0.0153026	-0.0218364	-2075.91
-0.138005	-0.0462857	-2073.27
-0.0837294	0.215375	-2072.85
-0.226033	-0.237761	-2078.38
-0.235904	-0.231536	-2076.58
-0.239591	-0.324313	-2071.29
-0.215689	0.0559796	-2072.83
-0.310673	0.157393	-2078.38
-0.328637	0.156884	-2075.22
0.312724	-0.272688	-1998.38
0.279883	-0.360183	-1998.38
0.318439	-0.137488	-1998.38
0.289406	-0.128092	-1998.38
0.25043	0.0522136	-1998.38
0.220316	0.028151	-1998.38
0.303946	-0.0600413	-1994.29
0.208896	0.0403805	-1995.1
0.265864	-0.100303	-1991.79
0.216452	-0.0813378	-1990.74
0.342241	0.0294944	-1989.11
0.239562	-0.0477276	-1988.78
0.179066	0.0963909	-1998.38
0.197185	0.184699	-1996.73
0.222957	0.161185	-1990.52
0.209109	0.173043	-1991.7
0.177344	0.184919	-1991.31
0.171986	0.27654	-1991.78
0.187832	0.231809	-1989.73
0.151225	-0.246646	-1989.59
0.151531	0.0751511	-1998.38
0.140598	-0.121239	-1998.38
0.107268	-0.146464	-1998.38
0.0629198	0.0293342	-1998.38
0.0589529	-0.101876	-1992.38
0.0149043	-0.0731564	-1991.07
0.0339481	-0.0210846	-1989.48
0.156217	0.236736	-1998.38
0.156528	0.157844	-1998.38
0.154301	0.116036	-1998.38
0.127854	0.192536	-1998.38
0.123313	0.223854	-1988.82
-0.152878	-0.260359	-1998.38
-0.188029	-0.246406	-1994.64
-0.182546	-0.305284	-1991.56
-0.0182653	-0.15338	-1998.38
-0.0522117	0.0125197	-1998.38
-0.0598129	0.0502421	-1998.38
-0.0997114	-0.166818	-1998.38
-0.157361	-0.180942	-1998.38
-0.010415	0.0852445	-1998.38
-0.0555138	0.0903727	-1998.38
-0.0574521	0.123404	-1998.38
-0.0811283	0.100205	-1998.38
-0.133499	0.123433	-1998.38
-0.212336	0.0196968	-1994.81
-0.219544	0.0104094	-1995.1
-0.238333	-0.182886	-1989.29
0.27267	-0.212112	-1912.45
0.262789	-0.0501446	-1918.38
0.243583	0.0637881	-1918.38
0.243142	-0.0602368	-1918.38
0.235814	0.0378296	-1918.38
0.21904	0.0391653	-1918.38
0.208346	0.0278298	-1918.38
0.21144	-0.0499904	-1918.38
0.304091	-0.0841023	-1913.96
0.223296	0.0120171	-1908.64
0.204271	-0.0632665	-1909.43
0.192433	0.0460808	-1910.02
0.21569	0.104533	-1918.38
0.206336	0.181398	-1918.38
0.19367	0.178738	-1918.38
0.18101	0.164045	-1918.38
0.19625	0.122254	-1916.34
0.27219	0.207669	-1909.86
0.204068	0.223023	-1908.72
0.177673	0.276212	-1908.79
0.168707	0.0409051	-1918.38
0.152131	0.030102	-1918.38
0.14489	0.0285066	-1918.38
0.0531908	-0.0753222	-1918.38
0.0373208	-0.114607	-1918.38
0.0308702	-0.102783	-1918.38
0.00459584	-0.0746706	-1918.38
0.154186	0.0519629	-1913.99
0.0500691	-0.045233	-1913.75
0.138582	0.0644466	-1912.09
0.00558232	0.0476062	-1910.03
0.0921012	0.16899	-1918.38
0.08158	0.125315	-1918.38
0.022581	0.14868	-1918.38
0.139853	0.128694	-1914.73
0.0267419	0.213688	-1914.52
0.103985	0.200353	-1911.2
0.174869	0.078659	-1910.07
0.139655	0.0948583	-1909.49
0.1518	0.322761	-1918.38
-0.0963903	-0.228577	-1918.38
-0.155497	-0.25802	-1910.99
-0.171172	-0.253465	-1912.68
-0.00151223	-0.0827002	-1918.38
-0.00497313	-0.0966806	-1918.38
-0.168529	-0.196106	-1916.35
-0.150237	-0.0201641	-1910.94
-0.0538877	0.0938073	-1912.25
-0.105322	0.0511915	-1912.35
-0.183249	-0.232529	-1913.28
-0.207647	0.112323	-1918.38
-0.284736	0.0698344	-1908
0.35242	-0.638155	-1918.01
0.362286	0.136298	-1835.34
0.271721	-0.244938	-1838.38
0.216079	-0.301359	-1838.38
0.215372	-0.324556	-1838.38
0.328637	-0.0810385	-1838.38
0.314368	-0.0776581	-1838.38
0.299806	-0.126319	-1838.38
0.287807	-0.0538544	-1838.38
0.266081	-0.0426521	-1838.38
0.256655	0.00297602	-1838.38
0.251845	-0.110238	-1838.38
0.248092	0.0709104	-1838.38
0.233314	0.0318759	-1838.38
0.231821	0.0692348	-1838.38
0.215961	0.087971	-1838.38
0.207238	0.0199315	-1838.38
0.327758	-0.137117	-1832.08
0.182464	0.0176578	-1832.05
0.268891	0.123557	-1838.38
0.25676	0.210997	-1838.38
0.244143	0.219083	-1838.38
0.231264	0.216985	-1838.38
0.227003	0.206169	-1838.38
0.215937	0.170059	-1838.38
0.20327	0.21049	-1838.38
0.189605	0.193189	-1838.38
0.16915	0.218247	-1838.38
0.163549	0.188007	-1838.38
0.161408	0.169639	-1838.38
0.154241	0.151575	-1838.38
0.235184	0.267204	-1830.51
0.207626	0.165032	-1831.47
0.157373	-0.31758	-1838.38
0.150123	-0.315171	-1838.38
0.0393252	-0.210898	-1838.38
0.148773	-0.252169	-1831.66
0.0663475	0.0267281	-1838.38
0.0398143	0.0665014	-1832.78
0.138777	0.118608	-1838.38
0.137456	0.168595	-1838.38
0.127283	0.109363	-1831.57
0.112412	0.233061	-1832.75
-0.11961	-0.199226	-1838.38
-0.164931	-0.286476	-1838.38
-0.172987	-0.227802	-1838.38
-0.195683	-0.349195	-1838.38
-0.106562	-0.221179	-1834.37
-0.152671	-0.288158	-1834.53
-0.0694515	-0.194815	-1832.13
-0.131617	-0.181497	-1838.38
-0.219028	-0.185442	-1831.33
-0.156332	-0.12935	-1830.19
-0.265717	0.220408	-1834.08
-0.245743	0.0972055	-1829.98
-0.257632	0.22514	-1829.47
0.321884	-0.331489	-1758.38
0.269395	-0.202963	-1758.38
0.269481	-0.229314	-1758.38
0.308165	-0.200601	-1756.16
0.30429	0.0809908	-1758.38
0.271937	-0.0269885	-1758.38
0.253094	-0.0725367	-1758.38
0.27653	0.114404	-1758.38
0.244673	0.255936	-1758.38
0.24145	0.316255	-1758.38
0.234905	0.23305	-1758.38
0.230821	0.154781	-1758.38
0.198697	-0.249724	-1758.38
0.180712	-0.332821	-1758.38
0.0758862	-0.275724	-1758.38
0.21117	0.0500767	-1758.38
0.181181	0.0486466	-1758.38
0.155364	-0.0735605	-1758.38
0.0766787	0.0352444	-1758.38
0.160791	0.0698943	-1755.83
0.213317	0.218959	-1758.38
0.210616	0.204874	-1758.38
0.203505	0.177734	-1758.38
0.202856	0.152477	-1758.38
0.200597	0.219661	-1758.38
0.200907	0.111777	-1758.38
0.197125	0.129313	-1758.38
0.188085	0.191318	-1758.38
0.185204	0.220134	-1758.38
0.167805	0.201786	-1758.38
0.157347	0.315167	-1758.38
0.14225	0.202537	-1758.38
0.122453	0.145948	-1758.38
0.100303	0.227908	-1758.38
0.0914905	0.223765	-1758.38
0.0906844	0.153914	-1758.38
0.12825	0.0987219	-1756.69
0.180112	0.288376	-1752.7
0.111933	0.0874942	-1752.47
-0.0557876	-0.219107	-1758.38
-0.0670821	-0.22387	-1758.38
-0.115346	-0.23676	-1758.38
-0.119631	-0.217755	-1758.38
-0.118564	-0.307547	-1758.38
-0.0986009	-0.217652	-1755.32
-0.104565	-0.205493	-1755.12
0.0512391	0.0105777	-1758.38
0.0193314	-0.10552	-1758.38
-0.0499154	-0.12275	-1758.38
-0.0677922	0.0224152	-1758.38
-0.0854355	-0.183538	-1758.38
-0.0862942	-0.167266	-1758.38
-0.123071	-0.158712	-1758.38
-0.0611097	-0.172151	-1752.92
0.0400834	0.0741794	-1758.38
0.0326511	0.105108	-1756.34
-0.169685	-0.298795	-1755.75
-0.157475	0.0580087	-1758.38
-0.16301	-0.100175	-1758.38
-0.177629	0.0673548	-1755.14
0.390484	-0.298694	-1678.38
0.367712	-0.365404	-1678.38
0.354716	-0.172174	-1678.38
0.345385	-0.327899	-1678.38
0.296086	-0.199101	-1678.38
0.301933	-0.0173301	-1678.38
0.297955	-0.118335	-1678.38
0.248068	-0.154021	-1678.38
0.204187	-0.0402945	-1678.38
0.384546	0.215301	-1678.38
0.305419	0.198224	-1678.38
0.305397	0.120061	-1678.38
0.301897	0.101625	-1678.38
0.271603	0.237653	-1678.38
0.265774	0.0931676	-1678.38
0.261762	0.28982	-1678.38
0.255459	0.213451	-1678.38
0.250968	0.164591	-1678.38
0.245028	0.263379	-1678.38
0.217333	0.26928	-1678.38
0.21475	0.10194	-1678.38
0.212289	0.192336	-1678.38
0.210688	0.280141	-1678.38
0.207987	0.143063	-1678.38
0.0623983	-0.0204406	-1678.38
0.0223331	0.0259816	-1678.38
0.19322	0.138549	-1678.38
0.18723	0.231554	-1678.38
0.184332	0.206665	-1678.38
0.183957	0.0868695	-1678.38
0.166069	0.175074	-1678.38
0.159909	0.0941593	-1678.38
0.147091	0.13652	-1678.38
0.144039	0.262934	-1678.38
0.143456	0.119781	-1678.38
0.141118	0.0952194	-1678.38
0.130002	0.141019	-1678.38
0.127515	0.0906401	-1678.38
0.121638	0.20356	-1678.38
0.117441	0.105167	-1678.38
0.0883655	0.182076	-1678.38
0.0343647	0.12824	-1678.38
0.136438	0.351333	-1678.38
-0.0453182	-0.191119	-1678.38
-0.0690757	-0.249899	-1678.38
-0.128549	-0.210055	-1678.38
-0.135745	-0.188786	-1678.38
-0.0606443	0.035561	-1678.38
-0.100068	-0.0451835	-1678.38
-0.218101	0.226103	-1678.38
0.329361	-0.0534313	-2388.66
0.352369	-0.103527	-2388.66
0.24285	-0.193833	-2382.18
0.193852	-0.124219	-2385.42
0.176206	-0.222929	-2395.14
-0.0895516	-0.123472	-2391.9
-0.0759602	-0.0953118	-2395.14
-0.115174	-0.0347332	-2395.14
-0.10527	-0.160053	-2388.66
-0.253072	0.178429	-2388.66
-0.218951	0.207568	-2395.14
-0.250138	0.154416	-2395.14
0.275065	0.254258	-2385.42
0.334385	0.284352	-2388.66
0.328995	0.120104	-2382.18
0.182887	0.147053	-2388.66
0.234837	0.177415	-2395.14
0.24448	0.199403	-2388.66
0.213046	0.206916	-2391.9
0.1655	0.120317	-2391.9
0.104766	0.0898508	-2385.42
0.109265	0.0658877	-2382.18
0.0978394	0.161462	-2391.9
0.144333	-2.42985e-05	-2385.42
0.207209	-0.0584014	-2388.66
0.22691	-0.0654123	-2395.14
0.2185	-0.00443932	-2388.66
0.210607	0.0211846	-2395.14
0.206305	0.0437191	-2395.14
0.242297	-0.0194147	-2395.14
0.283388	0.0145152	-2395.14
0.324839	0.0340074	-2391.9
0.0419633	-0.00436721	-2388.66
0.0429583	0.013829	-2395.14
0.105724	0.240785	-2388.66
0.173069	0.235847	-2385.42
0.263614	-0.249313	-2395.14
-0.245816	0.0956883	-2311.9
-0.226659	-0.0944229	-2305.42
-0.127016	-0.143982	-2308.66
-0.133741	-0.241012	-2311.9
-0.14743	-0.255607	-2308.66
-0.0791725	-0.208664	-2315.14
-0.0880486	-0.057676	-2315.14
-0.177862	-0.125427	-2308.66
0.195398	0.0123175	-2311.9
0.0546407	-0.0695281	-2305.42
-0.0643231	-0.0931248	-2308.66
0.110865	0.059308	-2308.66
0.127879	0.0411027	-2302.18
0.0604976	0.0383598	-2315.14
0.126687	0.143098	-2308.66
0.13694	0.161902	-2311.9
0.169054	0.143641	-2305.42
0.187472	0.217123	-2308.66
0.111687	0.301318	-2302.18
0.256543	0.253242	-2308.66
0.260763	0.271749	-2311.9
0.271293	0.265939	-2308.66
0.283674	0.185073	-2311.9
0.233465	0.213795	-2308.66
0.212222	0.24719	-2302.18
0.092991	0.241101	-2315.14
0.205716	0.15023	-2305.42
0.223287	0.17025	-2305.42
0.238253	0.112775	-2302.18
0.241895	0.0825061	-2308.66
0.241432	0.0553446	-2308.66
0.207602	0.0776289	-2308.66
0.160329	0.105638	-2308.66
0.188055	-0.0521101	-2311.9
0.168391	-0.0504502	-2302.18
0.221904	-0.0570628	-2315.14
0.245211	-0.0548101	-2302.18
0.23663	-0.10752	-2311.9
0.290168	-0.00805095	-2311.9
0.26823	-0.0156623	-2305.42
0.312189	0.0739857	-2308.66
0.340745	0.0275544	-2305.42
0.317932	0.169195	-2311.9
0.287786	0.218915	-2305.42
0.220857	0.0750293	-2311.9
0.27698	-0.171618	-2311.9
0.241164	-0.206455	-2308.66
0.312937	-0.267239	-2305.42
0.288242	-0.361107	-2305.42
0.132909	0.000468116	-2311.9
0.177898	0.0451558	-2302.18
0.242727	0.0339147	-2305.42
0.193616	0.037032	-2308.66
0.120258	-0.141615	-2315.14
-0.270928	0.195888	-2228.66
-0.321463	0.0134371	-2225.42
-0.315339	-0.0570336	-2228.66
-0.232694	-0.272583	-2228.66
-0.204597	-0.219251	-2231.9
-0.180311	-0.175931	-2228.66
-0.161427	-0.154795	-2228.66
-0.110227	-0.103839	-2231.9
-0.0545323	-0.109647	-2225.42
-0.0789404	-0.0732098	-2235.14
-0.0422581	0.00383814	-2225.42
0.185155	-0.102549	-2228.66
0.206474	-0.0709317	-2231.9
0.284389	-0.0272514	-2225.42
0.31438	0.0290979	-2231.9
0.301269	0.078979	-2228.66
0.282849	0.0993425	-2231.9
0.26559	0.0345039	-2225.42
0.338084	-0.110972	-2228.66
0.263875	-0.25201	-2228.66
0.220647	-0.232472	-2231.9
0.19669	-0.231992	-2225.42
0.157188	-0.205814	-2235.14
0.198317	-0.28956	-2228.66
0.236798	-0.335109	-2231.9
0.318694	-0.433626	-2231.9
0.247519	0.0970568	-2228.66
0.242233	0.0865673	-2225.42
0.230704	0.0848868	-2225.42
0.219832	0.0683175	-2225.42
0.207286	0.0178258	-2235.14
0.202685	0.0384982	-2225.42
0.17732	0.0629818	-2228.66
0.172381	0.015818	-2228.66
0.180846	-0.0272119	-2231.9
0.175448	-0.0442021	-2225.42
0.158413	-0.0391994	-2231.9
0.156021	-0.0240821	-2231.9
0.135195	-0.0137805	-2231.9
0.0853602	0.077941	-2225.42
0.0733218	0.119551	-2231.9
0.0378434	0.0656997	-2231.9
0.115183	0.217812	-2225.42
0.178091	0.161976	-2231.9
0.179964	0.135509	-2231.9
0.201141	0.166992	-2231.9
0.236972	0.206505	-2225.42
0.242422	0.158538	-2225.42
0.262403	0.146449	-2231.9
0.277931	0.155584	-2231.9
0.231819	0.175884	-2235.14
0.193831	0.103554	-2228.66
-0.154097	-0.049826	-2151.9
-0.177096	-0.143778	-2148.66
-0.12244	-0.114034	-2155.14
-0.112945	-0.0991491	-2155.14
-0.0473546	0.0206466	-2151.9
0.0016076	-0.0700943	-2151.9
-0.218122	0.177489	-2155.14
0.0784868	0.113735	-2148.66
0.0795392	0.0580184	-2155.14
0.0910506	0.0592944	-2151.9
0.132828	0.0622611	-2148.66
0.122843	0.0844679	-2155.14
0.108896	0.214857	-2145.42
0.161403	0.161748	-2142.18
0.15443	0.138583	-2148.66
0.209751	0.114525	-2145.42
0.223361	0.136844	-2145.42
0.245358	0.108867	-2148.66
0.249184	0.123334	-2148.66
0.283727	0.0836046	-2145.42
0.300174	0.0921027	-2145.42
0.22469	0.234751	-2148.66
0.209861	0.256082	-2145.42
0.189853	0.0745636	-2145.42
0.178527	0.087096	-2151.9
0.208412	0.0602989	-2142.18
0.214124	0.0805677	-2151.9
0.177088	0.0700823	-2148.66
0.186765	0.0252333	-2142.18
0.192762	-0.022825	-2155.14
0.183772	-0.0169558	-2148.66
0.128505	-0.0335998	-2155.14
0.110895	0.00623232	-2151.9
0.272786	-0.0545563	-2151.9
0.327637	-0.0239473	-2142.18
0.339198	-0.0636243	-2151.9
0.296645	-0.125361	-2145.42
0.240125	-0.190622	-2151.9
0.217007	-0.0648425	-2145.42
0.139591	-0.155273	-2145.42
0.233221	-0.300117	-2151.9
0.238697	-0.252492	-2148.66
0.328117	-0.168892	-2151.9
0.339629	-0.167592	-2148.66
0.364432	-0.167445	-2145.42
0.377403	-0.14709	-2148.66
0.230407	0.254835	-2148.66
-0.166446	-0.074372	-2155.14
0.157848	-0.0104781	-2151.9
0.121525	0.16533	-2151.9
-0.225721	-0.268033	-2071.9
-0.201054	-0.235609	-2068.66
-0.21768	-0.166087	-2065.42
-0.148943	-0.218886	-2068.66
-0.0612314	-0.0948767	-2071.9
-0.0932925	-0.0916625	-2068.66
-0.186077	0.00200126	-2068.66
-0.0533552	-0.0329208	-2071.9
-0.0963026	-0.191285	-2071.9
-0.105907	-0.24153	-2068.66
0.301407	-0.160789	-2068.66
0.371398	-0.201758	-2068.67
0.371452	-0.151669	-2062.19
0.238847	-0.211034	-2065.42
0.221854	-0.335978	-2068.66
0.208723	-0.262478	-2065.42
0.260771	-0.077063	-2062.18
0.158612	-0.0966964	-2068.66
0.116948	-0.00717721	-2071.9
0.186963	0.0192726	-2068.66
0.234903	0.0121789	-2068.66
0.253541	0.0381277	-2065.42
0.28587	0.0305955	-2065.42
0.283881	0.00251746	-2068.66
0.32382	0.0315588	-2068.66
0.34238	0.119733	-2068.66
0.260335	0.1	-2065.42
0.255093	0.131565	-2068.66
0.251168	0.149088	-2065.42
0.246925	0.18133	-2068.66
0.270518	0.132101	-2065.42
0.22632	0.203578	-2065.42
0.193975	0.186334	-2068.66
0.179964	0.260608	-2068.66
0.244328	0.228654	-2068.66
0.117884	0.0660275	-2068.66
0.0708545	0.0400333	-2068.66
0.269712	0.0636979	-2071.9
0.256427	0.064077	-2068.66
0.187179	0.00174797	-2068.66
0.238426	-0.116197	-2068.66
0.283872	-0.0827452	-2068.66
0.315649	0.194991	-1991.9
0.259744	0.129586	-1988.66
0.310449	0.0527601	-1991.9
0.324788	0.0319896	-1988.66
0.349285	0.00589114	-1995.14
0.35829	-0.016475	-1991.9
0.387917	-0.205691	-1988.66
0.331027	-0.200695	-1988.66
0.315349	-0.200282	-1988.66
0.293473	-0.165596	-1991.9
0.262549	-0.203869	-1988.66
0.209162	-0.265826	-1988.66
0.269619	-0.133252	-1991.9
0.282957	-0.0961581	-1988.66
0.291141	-0.0387485	-1988.66
0.270939	-0.065233	-1991.9
0.32666	-0.0976284	-1991.9
0.26135	0.00583239	-1991.9
0.244147	-0.050793	-1985.42
0.240873	-0.0200041	-1985.42
0.217913	-0.0422377	-1985.42
0.185149	-0.0201049	-1988.66
0.167113	-0.0169077	-1991.9
0.172201	-0.0652862	-1988.66
0.171867	-0.160558	-1988.66
0.208365	-0.127075	-1991.9
0.123434	-0.0907494	-1988.66
0.0591243	-0.00282972	-1991.9
0.0648885	-0.030504	-1995.14
0.0655096	0.0425948	-1995.14
0.0979889	0.0763806	-1988.66
0.159003	0.0768404	-1988.66
0.162106	0.0627843	-1991.9
0.153269	0.0434241	-1985.42
0.179663	0.0302337	-1985.42
0.180542	0.0055232	-1985.42
0.222534	0.0797179	-1991.9
0.209941	0.114879	-1991.9
0.225301	0.113705	-1985.42
0.237823	0.120558	-1991.9
0.224336	0.168426	-1988.66
0.222148	0.196792	-1991.9
0.189662	0.156274	-1988.66
0.159565	0.136931	-1988.66
0.321669	0.256217	-1988.66
0.11963	0.285045	-1991.9
0.231706	0.280031	-1988.66
0.101665	0.152442	-1991.9
0.129356	0.10557	-1988.66
0.10089	0.0983417	-1991.9
-0.0643245	0.0132855	-1991.9
-0.107185	0.0743877	-1995.14
-0.11405	-0.0322548	-1991.9
-0.293396	0.0735295	-1988.66
-0.178061	-0.176191	-1988.66
-0.127174	-0.166777	-1991.9
-0.111758	-0.159882	-1995.14
-0.121812	-0.140244	-1985.42
0.216942	0.0395476	-1991.9
0.159915	0.109173	-1991.9
0.0369281	-0.00138385	-1991.9
-0.15613	-0.172019	-1911.9
-0.148981	-0.159914	-1911.9
-0.150523	-0.232804	-1911.9
-0.0925053	-0.201174	-1908.66
-0.16709	0.0349634	-1915.14
-0.146137	0.278772	-1908.66
-0.25316	-0.0674493	-1905.42
-0.297987	0.0404826	-1905.42
-0.0615087	-0.153305	-1915.14
-0.138654	-0.155419	-1915.14
-0.00929721	-0.0690027	-1905.42
0.077318	0.0680127	-1915.14
0.133023	0.138195	-1911.9
0.128453	0.11084	-1915.14
0.155936	0.101487	-1911.9
0.132555	0.0865459	-1911.9
0.224337	0.121085	-1911.9
0.240671	0.0910884	-1911.9
0.128647	0.289327	-1905.42
0.0973442	0.198781	-1911.9
0.115679	0.183902	-1915.14
0.0990128	0.167706	-1908.66
0.307984	0.182347	-1915.14
0.275806	0.1799	-1911.9
0.244971	0.174471	-1915.14
0.255966	0.131707	-1905.42
0.275916	0.120878	-1911.9
0.282126	0.116356	-1915.14
0.312854	0.132236	-1911.9
0.318915	0.112262	-1908.66
0.310909	0.0932191	-1915.14
0.339407	0.101009	-1905.42
0.327181	0.0877342	-1908.66
0.325063	0.0653165	-1911.9
0.298603	0.0091585	-1911.9
0.342599	-0.0486054	-1908.66
0.375969	-0.0649994	-1911.9
0.393214	-0.0714376	-1915.14
0.318212	-0.0787871	-1905.42
0.338789	-0.0870072	-1915.14
0.298267	-0.205573	-1911.9
0.301632	-0.157363	-1908.66
0.438787	-0.301241	-1908.66
0.374907	-0.19262	-1915.14
0.373043	-0.206503	-1915.14
0.422584	-0.218436	-1911.9
0.291735	-0.0200194	-1908.66
0.216485	-0.140044	-1911.9
0.208046	-0.048077	-1911.9
0.212843	-0.0272355	-1911.9
0.192871	-0.017585	-1915.14
0.189906	-0.00256214	-1908.66
0.166372	-0.0215817	-1915.14
0.136284	-0.0174125	-1915.14
0.0920121	0.00295706	-1915.14
0.0764621	-0.0747134	-1908.66
0.0468031	0.0351058	-1908.66
0.15119	0.042773	-1915.14
0.163119	0.0363713	-1911.9
0.169489	0.0164798	-1915.14
0.210386	0.0807445	-1915.14
0.220192	0.0860078	-1911.9
0.227158	0.0568986	-1915.14
0.23346	0.0470308	-1908.66
0.216832	0.0534758	-1918.38
0.242187	0.0747669	-1908.66
0.258271	0.0989526	-1915.14
0.185091	0.105752	-1915.14
0.21214	0.153308	-1915.14
0.186595	0.0420901	-1911.9
0.166298	-0.113618	-1915.14
0.177061	-0.138116	-1915.14
0.154774	-0.0632808	-1915.14
0.0648824	-0.137132	-1915.14
0.269051	-0.0205593	-1905.42
-0.225615	-0.110594	-1828.66
-0.149942	-0.193471	-1825.42
-0.144783	-0.22971	-1831.9
-0.100512	-0.00363902	-1822.18
-0.00497417	-0.0711433	-1828.66
0.0641966	0.00630043	-1825.42
0.138974	-0.10526	-1828.66
0.17766	-0.0417842	-1825.42
0.122068	0.166316	-1828.66
0.141107	0.17353	-1828.66
0.146193	0.129382	-1825.42
0.147309	0.114185	-1831.9
0.15115	0.0866344	-1825.42
0.134841	0.0720736	-1831.9
0.131801	0.0552898	-1825.42
0.121538	0.0876876	-1822.18
0.0925942	0.0651365	-1831.9
0.176353	0.12891	-1831.9
0.198709	0.121459	-1825.42
0.186417	0.13674	-1828.66
0.161484	0.101917	-1825.42
0.224195	0.112712	-1825.42
0.236896	0.113736	-1831.9
0.255178	0.125523	-1828.66
0.2773	0.134337	-1831.9
0.316684	0.181882	-1828.66
0.333097	0.206155	-1828.66
0.352385	0.175494	-1828.66
0.332089	0.0881174	-1828.66
0.344124	0.223831	-1822.18
0.202429	0.285619	-1822.18
0.12586	0.198101	-1831.9
0.280961	0.0812555	-1822.18
0.308401	0.098384	-1831.9
0.292484	-0.0136576	-1825.42
0.289908	-0.0310134	-1828.66
0.260486	-0.0189902	-1825.42
0.253913	-0.0452638	-1822.18
0.278415	0.0328734	-1822.18
0.194268	0.0226989	-1828.66
0.216113	0.0754941	-1822.18
0.20968	0.0575569	-1825.42
0.165509	0.0680368	-1822.18
0.0892589	-0.00948873	-1828.66
0.15178	-0.0583378	-1831.9
0.249643	-0.0666375	-1822.18
0.286554	-0.0883374	-1825.42
0.30317	-0.147283	-1825.42
0.285536	-0.190049	-1828.66
0.259021	-0.281187	-1828.66
0.374206	-0.215036	-1828.66
0.388953	-0.273788	-1825.42
0.328984	-0.196685	-1828.66
0.311416	-0.410576	-1828.66
0.170031	-0.27787	-1825.42
0.274895	0.193604	-1831.9
-0.287488	0.215832	-1745.42
0.209661	-0.34043	-1751.9
0.263055	-0.342262	-1751.9
0.262901	-0.393806	-1748.66
0.294266	-0.381928	-1748.66
0.404408	-0.273671	-1745.42
0.401507	-0.222342	-1748.66
0.359503	-0.159323	-1751.9
0.312273	-0.0886344	-1755.14
0.224447	-0.11923	-1745.42
0.248497	-0.0820664	-1748.66
0.289689	-0.0444877	-1751.9
0.297822	-0.0166495	-1748.66
0.354909	-0.0534419	-1755.14
0.378386	-0.0261208	-1751.9
0.366986	0.0528981	-1751.9
0.299949	0.0358178	-1745.42
0.288083	0.0242706	-1748.66
0.271727	0.0253226	-1742.18
0.264882	0.0474699	-1751.9
0.236881	0.0345996	-1745.42
0.232098	0.0736546	-1745.42
0.22948	0.0859784	-1751.9
0.242994	0.0767153	-1745.42
0.256908	0.0893962	-1751.9
0.283302	0.0911244	-1748.66
0.239807	0.121284	-1745.42
0.204953	0.0193659	-1748.66
0.188063	0.0105644	-1751.9
0.190898	-0.0097798	-1748.66
0.171258	-0.0787908	-1745.42
0.149024	-0.036801	-1751.9
0.12873	-0.0295533	-1745.42
0.0786769	0.0286507	-1755.14
0.117612	0.182437	-1745.42
0.122926	0.240015	-1748.66
0.142164	0.187424	-1755.14
0.135306	0.162245	-1755.14
0.162596	0.154843	-1755.14
0.196844	0.12861	-1755.14
0.226819	0.157684	-1755.14
0.251702	0.177143	-1755.14
0.252994	0.153146	-1748.66
0.234128	0.18337	-1742.18
0.208646	0.183396	-1751.9
0.272134	0.144563	-1755.14
0.303878	0.166659	-1748.66
0.318542	0.167661	-1748.66
0.338114	0.18514	-1745.42
0.235518	-0.0476891	-1745.42
0.140205	0.0536276	-1751.9
0.124302	0.0919972	-1755.14
0.0269538	0.0813407	-1748.66
0.371716	0.196076	-1751.9
0.279084	-0.243031	-1751.9
0.257847	-0.222537	-1671.9
0.217324	-0.307858	-1675.14
0.229138	-0.339473	-1668.66
0.276849	-0.430367	-1675.14
0.379009	-0.151249	-1671.9
0.358579	-0.232819	-1675.14
0.303543	-0.123909	-1668.66
0.288245	-0.132474	-1668.66
0.252635	-0.126682	-1668.66
0.248591	-0.149998	-1675.14
0.233684	-0.126936	-1668.66
0.26336	-0.0901009	-1671.9
0.25519	-0.0511985	-1671.9
0.314922	-0.0359806	-1668.66
0.347079	-0.0576305	-1671.9
0.367136	-0.00163036	-1671.9
0.326826	0.0576014	-1668.66
0.30559	0.03542	-1675.14
0.286286	0.0719175	-1671.9
0.267867	0.0765531	-1671.9
0.284455	0.110681	-1678.38
0.232072	0.105157	-1668.66
0.231719	0.0211762	-1675.14
0.210336	-0.0304766	-1678.38
0.198612	-0.0674944	-1668.66
0.183193	-0.0317487	-1675.14
0.170198	-0.0347094	-1675.14
0.133664	-0.0505249	-1675.14
0.140649	0.0237155	-1668.66
0.11313	0.0314432	-1675.14
0.0812371	-0.0254516	-1675.14
0.065187	-0.00588761	-1668.66
0.0347995	0.0924717	-1675.14
0.159635	0.104609	-1675.14
0.193645	0.0841396	-1675.14
0.189693	0.166394	-1675.14
0.239449	0.166363	-1675.14
0.27878	0.154124	-1671.9
0.298379	0.191568	-1675.14
0.359396	0.198452	-1671.9
0.285845	0.248596	-1675.14
-0.00286905	-0.075048	-1671.9
-0.0717094	-0.106438	-1678.38
-0.103942	-0.190474	-1671.9
-0.12028	-0.176553	-1675.14
-0.131382	-0.174634	-1675.14
-0.15401	-0.26201	-1668.66
-0.190704	-0.178576	-1671.9
-0.15608	-0.0744621	-1675.14
-0.195371	0.0237154	-1675.14
