# Supplementary material for: Spinal premotor interneurons controlling antagonistic muscles are spatially intermingled
Source: eLife. 2022 Dec 13;11:e81976. doi: 10.7554/eLife.81976 (PMC9844990; doi:10.7554/eLife.81976)
Supplement: Figure 3—figure supplement 1—source data 3. [file elife-81976-fig3-figsupp1-data3.xlsx]

## Sheet: Sheet1
-0.201829	-0.106573	-1430
0.11326	0.0611394	-1428
0.245507	0.0370638	-1430
0.264725	0.0764405	-1412
0.12027	0.0833647	-1408
0.280387	0.209228	-1412
0.186404	0.139727	-1414
0.12257	0.128907	-1420
0.176706	0.0803218	-1424
0.176145	0.139192	-1438
0.289249	0.0402223	-1434
0.263819	0.150568	-1430
0.236026	0.185929	-1424
0.235712	0.0232268	-1426
0.209886	0.0218407	-1416
-0.0724586	-0.125969	-1428
-0.13926	0.0139608	-1438
-0.0712635	-0.0758323	-1438
0.20788	0.0897246	-1186
0.276165	0.0432594	-1190
0.235213	0.0276134	-1172
0.180377	-0.012214	-1172
0.22008	0.123435	-1174
0.240362	0.10187	-1180
0.314857	0.0480819	-1180
0.227031	0.0326346	-1182
0.250605	0.00242499	-1190
0.385613	-0.148007	-1174
0.224342	-0.176415	-1182
-0.143403	-0.192676	-1192
-0.0924781	-0.128143	-942
-0.131556	-0.119806	-944
-0.168792	-0.168079	-948
0.248031	0.168799	-962
0.193943	0.201177	-968
0.136462	0.106496	-930
0.274024	0.0682034	-932
0.172295	0.156189	-936
0.310369	0.097891	-940
0.245935	-0.165076	-944
0.322975	0.0453748	-940
0.268403	-0.0645919	-934
0.297768	-0.0847973	-932
0.298863	-0.0611661	-936
0.342852	-0.0134653	-936
0.223451	0.0580673	-944
0.25407	-0.0986936	-946
-0.101184	-0.195687	-950
-0.214247	-0.191698	-942
-0.220268	-0.193286	-938
0.27804	0.0405717	-948
0.281429	0.0382516	-952
0.172289	0.15653	-954
0.207423	0.0490521	-956
0.241172	0.0539654	-958
0.18142	0.055721	-952
0.0494998	0.169762	-952
0.10345	0.0970371	-960
0.192564	0.141697	-968
0.280824	0.0913236	-966
0.107887	0.0972977	-966
0.291797	-0.279076	-968
0.291671	-0.051639	-930
0.224056	-0.21673	-932
0.194909	-0.0460123	-936
-0.0931308	-0.218494	-942
0.166225	-0.0230877	-946
0.0943135	0.0749343	-948
0.257319	0.101692	-958
0.0948173	0.119658	-966
0.21698	0.193688	-942
0.205837	0.132105	-950
0.075926	0.22732	-932
0.241185	-0.285816	-1414
-0.14434	-0.220651	-1416
-0.149464	-0.35371	-1422
-0.0511171	-0.0458443	-1424
0.128686	0.236478	-1418
0.263433	0.0895279	-1424
0.166824	0.0582816	-1424
0.152372	0.16137	-1438
0.283867	0.0753807	-1436
0.208492	-0.057516	-1440
0.251617	0.0667828	-1426
0.0355435	0.186363	-1188
0.165558	0.121052	-1200
0.183672	0.169554	-1200
-0.0280277	0.0286542	-1200
0.148932	0.184979	-1198
0.242231	0.0248278	-1196
0.268809	0.0754061	-1198
0.270469	-0.0576743	-1190
0.246618	-0.0974416	-1174
0.276832	-0.074547	-1172
0.25057	-0.025496	-1198
0.11409	0.130233	-1198
0.322187	-0.0917877	-1200
0.231485	-0.0168245	-1192
0.295788	0.0228225	-1190
0.296121	-0.059743	-1182
0.0132219	-0.0415913	-1172
0.081698	0.0575066	-954
-0.0409231	-0.0858967	-948
-0.099071	0.00490008	-960
0.0573956	0.0556642	-928
0.00437619	-0.0440413	-928
0.299206	-0.0899647	-930
0.288817	-0.0933195	-934
0.134975	0.0107049	-936
0.183399	-0.0473763	-938
0.282333	0.00813599	-940
0.281844	-0.0588472	-936
0.257871	0.0104738	-944
0.142822	0.0630473	-944
0.204753	0.193705	-944
0.0328022	0.104956	-940
0.067949	0.25213	-942
0.132708	0.0663691	-958
0.102113	0.242376	-956
0.154281	0.0629813	-954
0.24919	0.0318968	-956
0.253094	0.0678021	-956
0.253671	0.128954	-958
0.178979	0.168947	-926
0.158108	0.184387	-930
0.200529	0.157453	-930
0.0847495	0.209257	-958
0.141392	0.225337	-958
0.191905	0.147506	-940
0.278582	0.030297	-956
0.261617	0.00691993	-960
0.182464	-0.0130732	-942
-0.177788	-0.0508604	-1404
-0.103194	-0.0883	-1410
-0.0797323	-0.0758083	-1420
-0.165219	-0.188758	-1428
-0.127292	-0.162612	-1430
-0.050137	-0.104615	-1432
-0.092891	-0.0445401	-1438
-0.135919	-0.105927	-1438
-0.138175	-0.184772	-1434
0.18252	0.187978	-1408
0.115672	0.143906	-1408
0.0749578	0.172784	-1408
0.110877	0.0539674	-1410
0.208737	0.0649127	-1412
0.210961	0.165797	-1416
0.0689239	0.161094	-1416
0.21133	0.150418	-1418
0.12051	0.162392	-1418
0.272149	0.189978	-1424
0.260255	0.187318	-1426
0.217417	0.202881	-1426
0.0728973	0.055301	-1418
0.209955	0.130457	-1426
0.172033	0.0626357	-1424
0.0566242	0.0411991	-1428
0.186404	0.153922	-1426
0.114076	0.151723	-1424
0.0877161	0.181459	-1428
0.0820089	0.19083	-1428
0.0934549	0.205683	-1434
0.259517	0.1601	-1436
0.286288	0.101501	-1440
0.236204	0.252238	-1440
0.0836109	0.0960461	-1436
0.0635223	0.0830153	-1410
0.181087	0.132124	-1440
0.348314	0.000177338	-1410
0.297739	0.0130237	-1410
0.241352	0.00888107	-1416
0.308722	-0.0938755	-1416
0.255265	0.0677217	-1416
0.196037	-0.100912	-1416
0.162363	0.00200037	-1422
0.290514	-0.0768014	-1424
0.264782	-0.159881	-1430
0.332847	0.0189468	-1428
0.315662	0.0130379	-1430
0.283442	0.00967554	-1436
0.164149	-0.0150099	-1440
0.332209	-0.0135699	-1428
0.292016	-0.0526054	-1424
0.158606	0.0264091	-1426
-0.137044	-0.14161	-1166
-0.0959217	-0.123194	-1166
-0.0982657	-0.148114	-1180
-0.116071	-0.0930699	-1188
0.0286568	-0.00285283	-1172
0.218012	0.02528	-1172
0.230853	0.14089	-1164
0.0968367	0.122516	-1176
0.0937834	0.19438	-1176
0.131456	0.197318	-1176
0.193442	0.132621	-1178
0.262917	0.13981	-1178
0.311821	0.139181	-1178
0.261509	0.0902524	-1178
0.0818735	0.201541	-1184
0.104311	0.177426	-1188
0.171128	0.189882	-1188
0.238897	0.121782	-1196
0.124157	0.103521	-1186
0.226381	0.0459912	-1186
0.34456	0.140311	-1190
0.273666	0.0264098	-1182
0.289271	0.152923	-1178
0.310022	0.0332241	-1176
0.232112	0.177581	-1174
0.226859	0.161629	-1168
0.129529	0.00105922	-1174
0.302076	0.0285424	-1166
0.309642	0.0196873	-1180
0.327134	0.0310351	-1184
0.336618	-0.0217422	-1182
0.37462	-0.13635	-1182
0.189582	-0.116825	-1182
0.369361	-0.0864604	-1176
0.28848	-0.0884588	-1172
0.272052	-0.138524	-1172
0.22122	-0.268314	-1172
0.1525	-0.0281258	-1194
0.206077	-0.0245103	-1194
0.230375	-0.0519793	-1194
0.161588	-0.257397	-1190
0.206226	-0.226157	-1194
0.230657	-0.00885506	-1176
0.318802	-0.278934	-1186
0.270633	-0.319573	-1182
-0.0488088	-0.0820045	-928
-0.0969682	-0.148379	-950
0.00668298	-0.0384896	-958
-0.110794	-0.157524	-960
-0.0544328	0.0130124	-930
-0.147565	-0.00998737	-946
0.117217	-0.0555236	-930
0.126053	0.0441044	-952
0.121712	0.0541971	-952
-0.165991	0.245957	-930
0.176824	0.165441	-928
0.162729	0.0804394	-928
0.0349183	0.158415	-930
0.22836	0.156078	-930
0.284057	0.0775056	-932
0.0826482	0.206618	-936
0.158104	0.210198	-938
0.15285	0.180566	-940
0.238664	0.210444	-940
0.238644	0.308303	-936
0.293542	0.182327	-940
0.271645	0.183387	-942
0.302348	0.160654	-942
0.210614	0.12175	-940
0.237266	0.136258	-940
0.182339	0.159826	-942
0.300949	0.0828397	-942
0.168283	0.132531	-948
0.149583	0.0794427	-952
0.263144	0.209391	-954
0.260317	0.180608	-958
0.230073	0.176614	-960
0.221283	0.130636	-960
0.0923131	0.190988	-958
0.0748714	0.162198	-954
0.0997553	0.152828	-952
0.0335148	0.105973	-958
0.153769	0.145248	-954
0.211333	0.0646126	-928
0.110564	0.224895	-952
0.232386	0.331843	-934
0.274712	0.0302358	-932
0.306538	0.0328678	-934
0.26215	-0.0132861	-938
0.300954	-0.0201853	-940
0.316687	-0.0685921	-942
0.323995	-0.0526109	-946
0.362614	-0.0903987	-946
0.17165	-0.0456836	-948
0.194476	0.0302709	-944
0.231217	0.0543234	-940
0.300509	0.059861	-954
0.187843	-0.0054534	-956
0.324369	0.00460415	-960
0.345947	-0.122235	-952
0.256486	-0.109173	-936
0.169067	-0.0686552	-928
0.209765	-0.248238	-936
0.30921	-0.250625	-944
0.241192	-0.284307	-944
0.274037	-0.166795	-960
-0.186123	-0.144801	-1550
0.26051	0.0139076	-1558
0.288612	0.0592399	-1570
-0.161776	-0.175682	-1534
0.227905	-0.131577	-1536
-0.252159	0.125506	-1536
-0.165566	-0.163884	-1536
0.145422	0.0863467	-1540
0.151995	0.093813	-1538
0.233538	0.0740773	-1540
0.191281	0.147514	-1544
0.125959	0.108121	-1548
0.262707	-0.0305915	-1550
0.226624	0.219852	-1550
0.317703	0.0852264	-1550
0.285258	-0.0247226	-1564
0.37542	0.0652224	-1566
0.321784	0.0102518	-1572
0.305724	-0.16306	-1574
0.406208	-0.160716	-1578
0.27223	-0.179344	-1578
0.225485	-0.0934878	-1578
0.259313	-0.0501445	-1578
0.156921	-0.0642848	-1576
0.158193	-0.0479696	-1576
0.143302	-0.0397083	-1574
-0.14362	-0.0950939	-1570
-0.189314	-0.210591	-1570
-0.0831374	-0.130491	-1572
-0.20076	-0.104454	-1568
-0.290153	-0.0840199	-1564
0.0993355	0.126964	-1552
0.110888	0.165548	-1548
0.0932918	0.0742206	-1536
0.0894104	0.0510314	-1576
0.0672279	0.020766	-1538
0.0916153	0.0275108	-1546
0.0574243	0.0120192	-1548
0.093146	0.120647	-1554
0.0883232	0.201537	-1578
0.107359	0.0250255	-1578
0.128291	0.11567	-1538
0.0198805	-0.014249	-1550
0.138623	0.00130478	-1548
0.128783	-0.030362	-1552
-0.0975133	-0.163339	-1556
-0.152052	-0.14987	-1556
-0.172237	-0.225831	-1550
-0.0664687	-0.083575	-1548
0.265383	0.0661572	-1548
0.309839	0.0667509	-1566
0.260068	-0.0065308	-1570
0.262175	0.0149394	-1570
0.179811	0.0311905	-1574
0.187148	0.0762502	-1534
0.287225	0.0335584	-1548
0.307324	0.139653	-1554
0.241815	-0.126191	-1114
0.185101	-0.0381493	-1122
0.296008	-0.0324538	-1122
0.291787	0.0139038	-1126
0.263609	0.105846	-1132
0.169515	0.123008	-1132
0.192737	0.153432	-1132
0.145553	0.168241	-1126
0.244002	0.159052	-1120
-0.211197	-0.20259	-1120
-0.153849	-0.181736	-1110
-0.181696	-0.164693	-1120
-0.106227	-0.109236	-1126
0.127499	0.268185	-1138
0.200061	0.278219	-1126
0.259057	0.242794	-1112
0.198515	0.167199	-1126
0.115621	0.257394	-1128
0.11334	0.173308	-1136
0.267529	0.134119	-1132
0.272821	0.204247	-1126
0.145645	0.169874	-1120
0.130071	0.145036	-1126
0.13062	0.144331	-1142
0.13062	0.144331	-1122
0.130406	0.143885	-1120
0.126918	0.144019	-1116
0.118758	0.146873	-1132
0.180438	-0.00384379	-1599.79
0.185352	0.0778026	-1594.99
0.247416	0.0139384	-1598.15
0.31196	0.0487365	-1595.46
0.310744	0.114571	-1591.59
0.339349	0.157853	-1588.76
0.2722	0.171569	-1591.39
0.24726	0.192013	-1587.65
0.248264	0.300383	-1581.24
0.10778	0.186504	-1589.33
0.236271	0.100623	-1593.14
0.219778	0.151933	-1590.28
-0.175456	-0.245217	-1515.83
-0.139693	-0.153339	-1517.48
-0.12167	-0.252845	-1516.51
-0.0911648	-0.221556	-1517.34
0.235635	-0.0116895	-1524.91
0.223932	-0.303637	-1521.81
0.123304	0.107811	-1524.79
0.192363	0.206554	-1527.22
0.206634	0.167819	-1526.9
0.245112	0.17606	-1527.61
0.249212	0.102328	-1526.65
0.33294	0.0767157	-1527.59
0.348217	0.124931	-1528.5
0.22634	0.172602	-1527.27
0.0596336	-0.333899	-1518.98
-0.00250526	-0.100792	-1404.98
0.155445	0.0617962	-1422.59
0.194376	0.0288473	-1409.17
0.198465	0.0529588	-1412.65
0.20396	0.15685	-1439.17
0.143715	0.19668	-1469.66
0.263321	0.165287	-1431.48
0.279649	0.179609	-1435.72
0.288117	0.207301	-1439.5
0.324884	0.228597	-1439.42
0.241782	0.0653973	-1403.17
0.240003	0.0257951	-1403.33
0.234052	-0.221649	-1342.29
0.237113	-0.359401	-1308.56
0.40059	0.0404662	-1377.29
0.298322	0.123673	-1410.5
0.261278	0.0189402	-1383.42
-0.0636811	0.0296353	-1339.53
0.182357	0.0787353	-1374.45
0.210785	0.0715806	-1383.03
0.225895	0.0536346	-1380.38
0.22486	0.0238552	-1377.21
0.234938	0.125977	-1391.72
0.1584	0.0365887	-1375.42
0.202487	-0.037926	-1368.9
0.146274	-0.0214189	-1365.64
0.135422	0.00664779	-1366.57
0.101977	0.110162	-1375.54
0.103946	0.209807	-1383.15
0.0624091	0.152506	-1374.69
0.228621	0.214437	-1397.11
0.332978	0.00313848	-1386.42
0.321695	-0.0617313	-1385.4
0.400784	-0.0138776	-1399.46
0.37606	0.176798	-1412.53
0.242212	-0.187193	-1368.04
0.22869	-0.233884	-1362.63
0.328337	-0.229855	-1373.16
0.050663	0.0281152	-1279.14
0.0788036	0.141514	-1301.82
0.161147	0.114933	-1306.21
0.1768	0.044447	-1293.98
0.190219	0.0528902	-1297.26
0.221159	0.0390779	-1302.14
0.225679	0.0610911	-1303.61
0.232033	0.0473159	-1299.42
0.234982	0.0996749	-1308.48
0.251901	0.109256	-1315.25
0.251325	0.144589	-1323.8
0.245299	0.172864	-1330.43
0.237763	0.229511	-1338.72
0.148493	0.220474	-1324.66
0.118634	0.189334	-1318.12
0.412428	-0.1036	-1309.13
0.357323	-0.300578	-1275.73
0.333333	-0.0360956	-1309.59
-0.160898	-0.194698	-1228.56
0.13668	0.277999	-1172.25
0.118162	0.232886	-1176.57
0.188607	0.284084	-1164.29
0.221018	0.212601	-1174.44
0.260974	0.199048	-1174.08
0.36225	0.149271	-1177.17
0.31275	0.10308	-1179.93
0.308736	0.115445	-1179.08
0.207747	0.154245	-1179.65
0.203522	0.0443882	-1188.68
0.194071	0.0246098	-1196.19
0.152411	0.0642272	-1188.95
0.116661	0.0697572	-1198.17
0.250391	-0.0609726	-1194.37
0.240162	-0.166285	-1204.12
0.228889	-0.238102	-1211.82
0.257045	-0.296432	-1208.87
0.359045	0.0122065	-1191.15
0.282648	0.0318973	-1186.79
0.258947	0.0599274	-1185.39
0.0280856	-0.016361	-1202.5
-0.178845	-0.204747	-1129.46
-0.149678	-0.202932	-1135.24
-0.0912726	-0.252262	-1133.92
-0.00194766	-0.065381	-1126.17
0.0319353	0.00176987	-1125.15
0.172102	0.0899297	-1136.56
0.224225	0.0696961	-1134.09
0.211413	0.0925802	-1137.76
0.199733	0.0522444	-1133.86
0.189046	0.0252258	-1139.25
0.136137	0.1608	-1133.04
0.079968	0.231566	-1128.87
0.121583	0.245901	-1124.91
0.212554	0.251454	-1127.72
0.236145	0.253431	-1128.43
0.24497	0.237774	-1129.23
0.237607	0.223609	-1119.75
0.29296	0.285767	-1129.23
0.319345	0.197759	-1128.14
0.308869	0.154277	-1134.08
0.257391	0.14336	-1123.05
0.256193	0.124284	-1133.34
0.195719	0.143924	-1125.85
0.165662	0.1255	-1130.32
0.259549	0.0418135	-1141.02
0.226293	-0.27784	-1148.5
0.271103	-0.329866	-1146.46
0.24123	-0.322381	-1145.29
0.176069	-0.330058	-1143.35
0.226869	-0.14844	-1140.31
-0.130228	-0.285791	-995.002
-0.100129	-0.185059	-1012.22
-0.0405971	-0.158663	-1013.39
0.0414427	0.0117744	-1035.93
0.110916	0.109732	-1054.93
0.125075	0.175862	-1053
0.114132	0.178393	-1057.57
0.0850798	0.219509	-1060.43
0.110694	0.226363	-1067.38
0.174779	0.163959	-1059.22
0.191842	0.152731	-1063.79
0.201657	0.122938	-1056.26
0.207957	0.188357	-1063.58
0.273856	0.266697	-1075.43
0.279983	0.324004	-1081.87
0.249079	0.298927	-1072.7
0.310072	0.2297	-1073.38
0.256457	0.140495	-1061.02
0.264859	0.0701677	-1049.08
0.228367	0.0487092	-1049.73
0.191907	0.0287255	-1050.54
0.272861	0.0222694	-1054.12
0.357361	0.0490314	-1056.57
0.267957	-0.134376	-1034.84
0.251343	-0.367464	-1013.53
0.155753	0.266641	-1069.19
0.132621	0.0506386	-1044.89
-0.161969	-0.239348	-874.061
-0.120455	-0.279927	-865.972
-0.0933532	-0.183934	-898.281
0.237926	-0.00945159	-969.847
0.361189	-0.00842625	-985.42
0.423176	-0.0897809	-969.533
0.348839	0.116151	-1011.11
0.1206	0.212602	-1015.38
0.103073	0.119075	-997.869
0.18359	0.0798098	-984.909
0.220353	0.104202	-994.105
0.230085	0.0952387	-993.137
0.240424	0.0950767	-993.544
0.259875	0.0707259	-990.135
0.261753	0.183228	-1018.73
0.256739	0.295839	-1047.06
0.216773	0.044047	-980.815
0.194876	0.0163037	-974.179
0.159337	-0.00218551	-963.794
0.179872	-0.0231234	-965.478
0.194353	-0.0275849	-959.884
0.225535	-0.175664	-907.341
0.195282	-0.183712	-902.09
0.259527	-0.359601	-908.677
0.346102	0.0981817	-922.964
0.308524	0.0288882	-921.441
0.282072	0.033508	-916.829
0.311298	0.14388	-916.815
0.275673	0.212387	-910.476
0.298787	0.282058	-909.482
0.22471	0.229434	-901.573
0.184646	0.263141	-899.406
0.113896	0.237043	-882.276
0.0731464	0.1446	-875.375
0.0780219	0.0761108	-876.364
0.111565	0.11261	-886.999
0.10518	0.0915606	-885.931
-0.248629	-0.119857	-824.485
-0.072923	-0.0831396	-801.857
-0.117189	-0.193564	-1134
-0.165511	-0.123762	-1134
0.205153	0.193016	-1136
0.311149	-0.0316997	-1134
0.273826	-0.103661	-1144
0.238531	-0.307676	-1146
-0.0366239	-0.115924	-1146
-0.1595	-0.11079	-1154
-0.143871	-0.16259	-1154
0.0101047	-0.0470893	-1164
0.11907	0.0386467	-1170
0.27488	0.0719	-1164
0.228657	0.165593	-1146
0.146441	-0.0973819	-1164
0.286428	-0.075488	-1164
0.159169	-0.246497	-1164
0.308523	-0.117278	-1164
0.298545	-0.1343	-1172
0.253849	-0.0877395	-1174
0.240101	-0.0194125	-1182
0.266781	-0.0380496	-1184
0.254853	-0.0211914	-1192
0.334242	-0.00851122	-1188
0.157282	0.00230797	-1154
-0.166477	-0.210727	-1154
-0.0829297	-0.129375	-1154
-0.0942396	-0.100843	-1152
-0.146334	-0.0727387	-1156
-0.213269	-0.01886	-1154
-0.117264	-0.136444	-1160
-0.12507	-0.0653064	-1162
-0.0531656	-0.0622736	-1162
-0.131651	-0.126981	-1162
0.0496726	-0.00908223	-1158
0.231527	0.161094	-1158
0.241601	0.243409	-1162
0.280002	0.172085	-1162
0.21234	0.137196	-1168
0.189223	0.14276	-1168
0.181531	0.157536	-1172
0.288048	0.13477	-1172
0.0889427	0.169699	-1168
0.0528594	0.180512	-1170
0.19054	0.157059	-1170
0.117985	0.223012	-1170
0.199242	0.178846	-1168
0.211875	0.100851	-1178
0.20115	0.150888	-1182
0.155987	0.15067	-1180
0.146957	0.143682	-1176
0.0850999	0.101312	-1176
0.159529	0.09523	-1172
0.200849	0.219656	-1176
0.0962512	0.231698	-1176
0.197034	0.15329	-1174
0.224551	0.0972114	-1180
0.245657	0.139655	-1182
0.233391	0.137714	-1182
0.194552	0.132513	-1172
0.181717	0.119719	-1152
0.208081	0.130645	-1156
0.192623	0.0924317	-1156
0.158365	0.0649182	-1162
0.12625	0.206158	-1164
0.11634	0.116452	-1164
0.126349	0.214237	-1166
0.124884	0.192134	-1164
0.164843	0.105639	-1162
0.0943216	0.116993	-1166
0.043594	0.0373965	-1172
0.377981	-0.0570652	-1172
0.319327	-0.0167492	-1174
0.223185	0.0619258	-1174
0.183494	-0.0194666	-1180
0.169074	0.0275945	-1180
0.278931	0.00313794	-1184
0.280811	-0.0113467	-1184
0.363145	0.101651	-1182
0.338257	0.0204047	-1180
0.211722	-0.0395235	-1186
0.322005	-0.0556823	-1186
0.156643	-0.00311368	-1186
0.117603	-0.00145575	-1186
-0.00903029	0.0611992	-1598.61
0.103423	0.0229661	-1598.61
0.367041	0.00514827	-1598.61
0.307012	-0.124485	-1590.27
0.0438321	0.151224	-1514.01
0.0682972	0.0994545	-1513.2
-0.0997115	-0.165861	-1510.18
0.10236	0.220269	-1513.1
0.109421	0.0569377	-1512.74
0.198756	0.0518857	-1510.59
0.310029	-0.120879	-1511.62
0.319803	-0.097547	-1511.35
-0.211476	0.252363	-1438.61
-0.107662	-0.12525	-1432.87
-0.214116	-0.281903	-1432.2
-0.103152	-0.198585	-1432.4
0.114058	0.0887312	-1436
0.126403	0.0838978	-1436.1
0.279149	-0.275285	-1427.01
-0.183085	-0.0630778	-1353.65
-0.171173	-0.0517832	-1353.84
-0.138081	-0.0572858	-1352.4
0.191723	0.260348	-1352.62
0.206794	0.106999	-1351.61
0.0926586	0.108785	-1353.73
0.292726	-0.243938	-1350.35
-0.0665645	-0.161679	-1348.43
0.261161	0.233802	-1278.61
0.120905	0.108121	-1275
0.157505	0.0428225	-1278.61
0.193423	-0.135738	-1278.61
0.275196	0.0853805	-1273.61
0.270027	-0.193589	-1278.61
0.267607	-0.372533	-1275.15
0.348347	0.0562022	-1278.61
0.323714	-0.240032	-1276.09
-0.235571	-0.158599	-1198.61
-0.286354	-0.309796	-1192.03
-0.19071	-0.288859	-1194.04
-0.141445	-0.236034	-1192.99
0.0607787	0.0835097	-1196.67
0.0419497	-0.314497	-1191.04
0.100457	0.311987	-1198.61
0.120076	0.30852	-1198.61
0.148216	0.140427	-1198.61
0.159981	0.15837	-1196.71
0.185749	0.124389	-1193.23
0.201605	0.0998332	-1198.61
0.256057	0.0188809	-1196.46
0.264511	0.0611219	-1192.73
0.27839	0.0613144	-1194.11
0.327067	-0.194089	-1198.61
0.337562	-0.175058	-1198.61
0.359917	-0.202031	-1198.61
0.371417	-0.331118	-1197.08
0.0829997	0.319801	-1109.09
0.183617	0.223829	-1112.73
0.181462	0.0259231	-1118.61
0.194644	-0.0607227	-1117
0.192703	-0.079404	-1113.41
0.203052	-0.0942663	-1112.95
0.209005	0.035329	-1113.9
0.212948	-0.0606423	-1113.97
0.221058	-0.0604072	-1112.86
0.158163	0.107326	-1110.17
0.270892	-0.141675	-1115.07
-0.177557	-0.212975	-1108.09
0.0205318	0.0828909	-1101.93
0.0366305	0.0471308	-1101.93
0.167909	0.191179	-1106.91
0.196868	0.147348	-1035.51
0.276765	0.209198	-1033.68
0.213403	0.146887	-1030.13
0.156321	0.138279	-1033.19
0.16513	0.121556	-1033.11
0.213473	0.120641	-1031.83
0.192026	0.0313015	-1031.09
0.235619	0.0311154	-1030.29
0.313197	-0.343362	-1030.48
0.347799	-0.0317421	-1032.08
0.36861	-0.278739	-1029.28
-0.313617	0.076655	-1024.72
0.139861	0.00521011	-1027.7
0.198834	-0.29627	-1023.38
0.275422	-0.395163	-1024.75
0.347091	-0.313722	-1024.47
0.445724	-0.211312	-1025.44
-0.143839	-0.0359878	-958.61
-0.110445	-0.0379335	-958.61
-0.143053	-0.00769152	-949.591
0.219079	0.195667	-955.401
0.166132	0.0894858	-956.723
0.129761	0.0588808	-954.355
0.273945	0.150295	-952.794
0.156963	0.0521298	-950.903
0.181541	-0.345872	-952.383
0.223308	-0.36702	-952.882
0.245682	-0.251464	-953.089
0.112722	0.203745	-947.946
0.226357	0.282052	-947.609
-0.111657	0.00420887	-878.61
-0.00453342	-0.0625187	-872.979
-0.156108	-0.256906	-878.61
-0.122363	-0.159462	-878.61
-0.154523	-0.179739	-872.782
-0.100079	-0.229399	-871.834
0.21997	0.231479	-878.61
0.171079	0.247784	-869.797
0.205838	0.0603303	-878.61
0.181907	0.128856	-874.601
0.153351	0.0354919	-872.786
0.210938	-0.0382021	-872.817
0.211174	-0.00641799	-871.024
0.204463	-0.340957	-873.736
0.297294	0.0567855	-878.61
0.262925	0.049861	-876.61
0.263386	-0.212383	-878.61
0.328878	-0.18677	-878.61
0.357296	-0.349934	-878.61
0.364295	-0.134801	-878.61
0.253332	-0.202273	-876.477
0.293522	-0.280629	-874.703
0.254916	-0.292486	-871.486
0.336658	-0.253043	-869.512
0.355311	-0.252883	-871.389
0.188421	0.0662965	-1599.12
0.282379	-0.129321	-1578.57
-0.108746	-0.141578	-1582.91
-0.147882	-0.0953903	-1596.01
-0.227255	-0.24682	-1584.91
0.351692	-0.248042	-1570.58
0.0982611	0.237386	-1515.83
0.0975896	0.162718	-1515.83
0.198323	0.0702099	-1510.27
0.0431411	0.0362892	-1518.61
0.29768	0.01599	-1510.27
-0.147082	-0.218969	-1430.27
0.235924	0.173493	-1433.05
0.152908	0.164213	-1430.27
0.0450452	0.0515448	-1438.61
0.0745566	0.00565271	-1427.49
0.288824	-0.178879	-1427.49
-0.199905	-0.185186	-1344.71
0.0872814	0.1699	-1350.27
0.105683	0.142353	-1344.71
0.0958151	0.224481	-1350.27
0.252132	-0.0355852	-1344.71
0.293677	-0.152842	-1344.71
0.193813	0.175627	-1347.49
0.302523	0.118706	-1350.27
0.279439	0.0568984	-1347.49
0.147702	0.0588777	-1355.83
0.160045	0.145441	-1353.05
0.101855	0.0437257	-1358.61
-0.26177	0.225393	-1350.27
0.339149	-0.198326	-1350.27
0.318836	-0.360754	-1347.49
-0.300581	0.12581	-1273.05
0.138649	0.224252	-1275.83
0.128423	0.0718891	-1275.83
0.123721	0.0997707	-1270.27
0.157147	0.16854	-1273.05
0.206121	0.119288	-1275.83
0.280165	0.0580802	-1270.27
0.234196	-0.198452	-1270.27
0.215591	-0.334664	-1273.05
0.239198	0.121892	-1275.83
-0.206924	-0.264431	-1195.83
-0.171038	-0.230809	-1198.61
0.10288	0.111254	-1195.83
0.133735	0.105604	-1198.61
0.158312	0.104395	-1195.83
0.21415	0.168138	-1195.83
0.112547	0.172559	-1187.49
0.100148	0.193664	-1193.05
0.0789333	0.24707	-1195.83
0.136011	0.0425589	-1193.05
0.193541	-0.000274918	-1195.83
0.170311	-0.00881644	-1198.61
0.237256	-0.0134223	-1190.27
0.320553	0.0182792	-1187.49
0.343264	0.162193	-1190.27
0.224386	-0.0340966	-1195.83
0.208996	0.147356	-1113.05
0.112079	0.173095	-1115.83
0.157394	0.114669	-1115.83
0.199788	0.0677424	-1115.83
0.278946	0.0236205	-1110.27
0.344297	-0.00225766	-1110.27
-0.248741	0.120509	-1113.05
0.352885	-0.148036	-1113.05
0.0800039	0.225954	-1118.61
0.138206	0.219771	-1113.05
0.14609	0.224507	-1113.05
0.157463	-0.14204	-1115.83
0.203394	-0.332165	-1115.83
0.349891	-0.122458	-1113.05
0.323111	-0.128304	-1107.49
0.370461	-0.31748	-1104.71
-0.256805	0.23997	-1038.61
-0.132061	-0.219856	-1033.05
-0.061303	-0.193498	-1027.49
-0.000625686	-0.073698	-1033.05
0.215564	-0.201517	-1027.49
0.221135	-0.275277	-1033.05
0.297638	-0.212165	-1030.27
0.263947	-0.0434233	-1030.27
0.221108	-0.0910351	-1033.05
0.22598	-0.131013	-1035.83
0.341321	-0.0913569	-1035.83
0.225045	-0.0223817	-1030.27
0.222255	-0.0425466	-1033.05
0.188594	0.0490791	-1030.27
0.196528	0.0108663	-1035.83
0.173308	0.039035	-1030.27
0.106017	0.0253141	-1035.83
0.265867	0.0936563	-1027.49
0.244202	0.158999	-1030.27
0.195581	0.152346	-1033.05
0.172345	0.228419	-1027.49
0.104223	0.203058	-1033.05
0.0790106	0.194048	-1027.49
-0.106856	-0.0333059	-950.27
-0.0037684	-0.105074	-950.27
0.00429418	-0.0929701	-950.27
0.26355	-0.166499	-953.05
0.318655	-0.166432	-947.49
0.240843	-0.0958543	-953.05
0.199438	-0.0883639	-955.83
0.210704	0.00180621	-953.05
0.262208	-0.0263716	-955.83
0.306966	0.0639755	-953.05
0.351455	0.0695585	-953.05
0.185343	0.0863748	-955.83
0.141338	0.0247287	-953.05
0.152618	0.113732	-955.83
0.165093	0.126548	-953.05
0.105166	0.158507	-953.05
0.151858	0.221061	-953.05
0.225416	-0.323491	-953.05
0.0362856	0.0354352	-955.83
0.129226	0.17878	-867.49
0.124138	0.112418	-873.05
0.132779	0.0726566	-873.05
0.0950311	0.0681646	-873.05
0.0683737	0.176255	-873.05
-0.147082	-0.0805088	-870.27
-0.133424	-0.154074	-870.27
-0.0607512	-0.140353	-873.05
-0.124481	-0.20036	-873.05
-0.228941	-0.141038	-875.83
0.227853	-0.210297	-873.05
0.239185	-0.180544	-867.49
0.253201	-0.0511292	-870.27
0.312786	0.00784613	-870.27
0.242513	-0.313297	-867.49
0.216002	-0.366563	-870.27
0.215829	-0.0130832	-873.05
-0.0759361	0.0875588	-873.05
-0.116609	0.00639758	-870.27
0.0211205	0.000435473	-870.27
0.177799	-0.108249	-873.05
0.136933	0.154297	-870.27
-0.0032436	0.0836526	-875.83
0.318451	-0.274425	-1598.38
0.281318	-0.349411	-1598.38
0.261501	-0.347052	-1598.38
0.223187	-0.179273	-1598.38
0.221152	-0.143972	-1598.38
0.356225	0.0669908	-1598.38
0.296234	-0.0577668	-1598.38
0.245052	0.0862766	-1598.38
0.224682	0.0168663	-1598.38
0.215377	0.0803261	-1598.38
0.206075	0.0662072	-1598.38
0.203262	0.0255416	-1598.38
0.292934	0.216083	-1598.38
0.245678	0.289173	-1598.38
0.242251	0.243453	-1598.38
0.232938	0.144418	-1598.38
0.21839	0.306787	-1598.38
0.206874	0.331166	-1598.38
0.2088	0.183334	-1598.38
0.197013	0.215559	-1598.38
0.196607	0.203917	-1598.38
0.195224	0.230989	-1598.38
0.179544	0.186477	-1598.38
0.176481	0.234616	-1598.38
0.195474	0.386007	-1598.38
0.163593	-0.203332	-1598.38
0.0945414	-0.25254	-1598.38
0.0612249	-0.151059	-1598.38
0.164519	0.0940039	-1598.38
0.157075	-0.05219	-1598.38
0.150128	0.111209	-1598.38
0.139032	0.0728289	-1598.38
0.128452	0.038214	-1598.38
0.108927	0.110228	-1598.38
0.0857044	0.0109645	-1598.38
0.0612001	0.0449595	-1598.38
0.0334049	0.0107544	-1598.38
0.0071205	-0.103542	-1598.38
0.165409	0.216936	-1598.38
0.159315	0.143408	-1598.38
0.142827	0.293006	-1598.38
0.136318	0.18859	-1598.38
0.113788	0.198247	-1598.38
0.094002	0.126046	-1598.38
0.0846814	0.233472	-1598.38
0.0723216	0.197325	-1598.38
0.0545436	0.196807	-1598.38
0.0365977	0.11384	-1598.38
-0.0703695	-0.183163	-1598.38
-0.126968	-0.241407	-1598.38
-0.129021	-0.222759	-1598.38
-0.147844	-0.250945	-1598.38
-0.110305	-0.150752	-1598.38
-0.140262	-0.144557	-1598.38
-0.149584	-0.0664705	-1598.38
-0.0707767	0.100299	-1598.38
-0.137885	0.279724	-1598.38
-0.192398	-0.192965	-1598.38
-0.225966	0.0720947	-1598.38
-0.290731	-0.0745821	-1598.38
-0.274628	0.125996	-1598.38
0.411967	-0.221038	-1518.38
0.339154	-0.342571	-1518.38
0.235036	-0.230955	-1518.38
0.211645	-0.255914	-1518.38
0.195356	-0.362855	-1518.38
0.19261	-0.216154	-1518.38
0.31341	0.0466233	-1518.38
0.248663	-0.0691585	-1518.38
0.232883	0.0104	-1518.38
0.196112	0.0781323	-1518.38
0.189226	-0.0317089	-1518.38
0.176798	0.0281968	-1518.38
0.239616	0.0955541	-1518.38
0.233207	0.186105	-1518.38
0.21646	0.193621	-1518.38
0.203856	0.0985342	-1518.38
0.190998	0.221022	-1518.38
0.187148	0.132287	-1518.38
0.183714	0.146789	-1518.38
0.160679	0.0791046	-1518.38
0.158632	-0.0101091	-1518.38
0.117092	0.0762411	-1518.38
0.111179	0.0677369	-1518.38
0.0680868	-0.185025	-1518.38
0.0467483	0.0102116	-1518.38
0.0344497	-0.000310406	-1518.38
0.0299043	0.00724643	-1518.38
-0.00267858	-0.0758018	-1518.38
0.17286	0.184222	-1518.38
0.162465	0.194494	-1518.38
0.161795	0.248931	-1518.38
0.16105	0.138672	-1518.38
0.143638	0.241792	-1518.38
0.140491	0.172837	-1518.38
0.119358	0.171394	-1518.38
0.116629	0.191239	-1518.38
0.110277	0.170257	-1518.38
0.084827	0.139084	-1518.38
0.082714	0.0842018	-1518.38
0.0521848	0.216828	-1518.38
-0.0910868	-0.200947	-1518.38
-0.099744	-0.215669	-1518.38
-0.0416777	-0.11222	-1518.38
-0.0474949	-0.17977	-1518.38
-0.0671518	-0.101947	-1518.38
-0.0671763	-0.0778672	-1518.38
-0.0752821	-0.0516593	-1518.38
-0.0921079	-0.135032	-1518.38
-0.117237	-0.04878	-1518.38
-0.127931	-0.0977461	-1518.38
-0.142114	-0.120303	-1518.38
-0.151829	-0.193477	-1518.38
-0.192958	-0.109882	-1518.38
-0.153645	0.182607	-1518.38
-0.191928	0.238008	-1518.38
-0.224897	0.0873956	-1518.38
0.183642	0.0299201	-1434.4
0.239577	0.0396172	-1430.72
0.246832	0.286331	-1438.38
0.18014	0.249953	-1438.38
0.317404	0.239645	-1435.13
0.24379	0.214547	-1435.88
0.20334	0.216473	-1434.58
0.183036	0.212766	-1434.34
0.180097	0.198428	-1434.28
0.313898	0.230443	-1431.73
0.225494	0.230661	-1429.44
0.217544	0.230298	-1428.44
0.201691	0.187133	-1429.68
0.198067	0.148362	-1429.63
0.0346629	-0.122145	-1433.5
0.142595	0.0539034	-1433.96
0.0894515	0.0776937	-1434.51
0.0661578	0.101828	-1434.99
0.136812	0.105472	-1432.99
0.121889	0.124451	-1430.8
0.10183	0.122241	-1428.68
0.0334236	-0.00306507	-1428.8
0.0303323	-0.0345396	-1429.32
0.0123499	0.0427128	-1428.85
0.00226042	0.0575319	-1429.77
0.153255	0.249429	-1438.38
0.149628	0.220003	-1438.38
0.150464	0.193539	-1433.7
0.0801501	0.252823	-1433.92
0.166872	0.159178	-1433.12
0.115213	0.184859	-1429
0.101368	0.171655	-1428.25
0.0725174	0.18482	-1430.2
-0.0376478	-0.157116	-1435.57
-0.0816691	-0.182747	-1434.09
-0.104029	-0.189912	-1433.46
-0.124508	-0.15666	-1433.03
-0.0774019	-0.195403	-1428.87
-0.145564	-0.127675	-1427.53
-0.0230531	-0.0700903	-1433.56
-0.0737876	-0.0152471	-1435.19
-0.105511	-0.0819789	-1431.68
-0.108698	-0.0514578	-1433.27
-0.0495514	0.204047	-1438.38
-0.233766	0.214046	-1434.57
-0.213583	0.209895	-1430.7
-0.251076	0.176729	-1428.26
0.321968	0.0742705	-1355.24
0.40744	-0.0625301	-1348.19
0.214875	-0.29185	-1356.31
0.302885	0.0158791	-1358.38
0.237967	-0.0218091	-1358.38
0.209562	-0.0287281	-1358.38
0.196827	0.0405811	-1358.38
0.312063	0.200783	-1358.38
0.208551	0.179818	-1358.38
0.200753	0.190857	-1358.38
0.188518	0.186832	-1358.38
0.187743	0.236105	-1358.38
0.180566	0.124337	-1358.38
0.179714	0.185458	-1358.38
0.179145	0.194426	-1358.38
0.25044	0.194887	-1349.1
0.189688	0.160082	-1349.2
0.113514	0.0691026	-1358.38
0.0550769	0.079464	-1358.38
0.102927	0.0854636	-1355.07
0.0562233	0.0649154	-1354.98
0.0584051	0.0258194	-1352.64
0.119292	0.0656256	-1348.86
0.13028	0.182232	-1358.38
0.123288	0.121652	-1358.38
0.114833	0.22351	-1358.38
0.103236	0.268441	-1358.38
0.102262	0.105921	-1358.38
0.0916758	0.165903	-1358.38
0.0484604	0.183777	-1358.38
-0.137326	-0.193973	-1358.38
-0.171911	-0.216011	-1356.27
-0.105729	-0.181908	-1351.13
-0.107245	-0.237185	-1348.96
-0.149312	-0.228394	-1349.06
-0.127479	-0.0804607	-1358.38
-0.052284	0.0328442	-1353.77
-0.239178	-0.0036061	-1358.38
-0.258218	-0.00526677	-1356.39
0.228728	-0.260404	-1274.13
0.245271	-0.226353	-1271.47
0.23598	-0.297936	-1269.98
0.256629	0.0422437	-1274.72
0.238338	-0.0630777	-1274.52
0.284549	0.101791	-1271.39
0.207019	-0.0437896	-1271.43
0.231264	0.194635	-1278.38
0.193566	0.235519	-1278.38
0.19475	0.133055	-1278.38
0.32914	0.123388	-1276.11
0.206331	0.202479	-1275.75
0.185862	0.133433	-1275.12
0.278904	0.141769	-1268.69
0.193307	0.182306	-1269.52
0.0254652	0.0146943	-1274.3
0.185409	0.0345668	-1268.57
0.162121	0.235169	-1278.38
0.142816	0.134603	-1278.38
0.115533	0.225757	-1278.38
0.102845	0.22314	-1278.38
0.0912624	0.164255	-1278.38
0.175354	0.168867	-1275.71
0.155108	0.109848	-1274.81
0.135562	0.149674	-1275.24
0.12549	0.123493	-1272.27
0.072247	0.2395	-1270.59
0.142989	0.119761	-1269.76
0.0766804	0.262784	-1267.84
-0.047767	-0.163574	-1273.95
-0.0698874	-0.162532	-1276.36
-0.0842556	-0.173912	-1268.07
-0.0263383	-0.00806996	-1272.72
-0.0862101	0.0066926	-1272.82
-0.115156	-0.0334633	-1267.76
-0.12021	-0.136753	-1268.47
-0.155693	-0.299131	-1272.63
-0.227308	0.33967	-1274.16
0.231197	-0.215976	-1264.57
0.220442	-0.280162	-1265.86
0.251353	-0.104689	-1263.92
0.116227	0.265274	-1265.39
0.0235881	-0.0826879	-1265.38
-0.0201909	-0.0325265	-1266.94
-0.0864622	-0.135456	-1264.05
-0.307997	0.234977	-1264.85
0.304316	-0.349884	-1198.38
0.298726	-0.291089	-1193.86
0.237896	-0.320404	-1193.82
0.246758	-0.285122	-1189.8
0.238218	0.0436072	-1198.38
0.219664	-0.0280928	-1198.38
0.196145	0.111945	-1198.38
0.26566	0.112575	-1194.76
0.295962	0.0763882	-1190.8
0.192861	-0.0253033	-1190.44
0.180505	0.0353637	-1190.49
0.171705	0.0167834	-1191.82
0.170147	0.0338053	-1190.75
0.223134	0.109425	-1189.1
0.244698	0.247982	-1198.38
0.229077	0.299963	-1198.38
0.221349	0.146607	-1198.38
0.20988	0.253671	-1198.38
0.184566	0.301554	-1198.38
0.181126	0.286698	-1198.38
0.189584	0.191298	-1194.07
0.176332	0.180909	-1196.15
0.0733765	-0.165296	-1194.24
0.132496	0.0378029	-1198.38
0.104055	0.0864547	-1198.38
0.033468	0.0756759	-1198.38
-0.0131655	0.0322181	-1198.38
0.0517328	0.0703314	-1193.12
0.138177	0.249408	-1198.38
0.125948	0.126957	-1198.38
0.105406	0.141256	-1198.38
0.0982754	0.214041	-1198.38
0.0907039	0.168574	-1198.38
0.0701279	0.216784	-1198.38
0.0675899	0.162848	-1198.38
0.0654041	0.127902	-1198.38
0.0377175	0.192607	-1196.21
0.1115	0.114705	-1190.6
0.104042	0.243495	-1191.76
-0.0836141	-0.153312	-1198.38
-0.0943746	-0.156813	-1198.38
-0.124341	-0.196088	-1198.38
-0.131447	-0.204662	-1198.38
-0.133591	-0.153286	-1198.38
-0.141072	-0.201377	-1198.38
-0.167553	-0.21171	-1194.5
-0.0581823	-0.152778	-1192.04
-0.0264419	0.0304103	-1198.38
-0.0664791	-0.0799567	-1198.38
-0.0780266	-0.047039	-1198.38
-0.0261394	-0.00142939	-1195.87
-0.0578931	0.0226776	-1193.33
-0.155821	-0.0831918	-1192.05
-0.175269	-0.128661	-1190.82
-0.106773	-0.131356	-1189.81
-0.184759	0.291656	-1198.38
-0.197499	0.294275	-1198.38
-0.186108	0.315223	-1187.65
-0.210765	0.304484	-1198.38
-0.215047	0.316088	-1198.38
-0.210121	0.274735	-1196.46
0.396678	-0.266812	-1108.44
0.346899	-0.110665	-1113.97
0.210436	-0.263579	-1114.39
0.315774	-0.17614	-1110.57
0.224567	-0.339922	-1112.18
0.257819	-0.201466	-1108.48
0.327396	0.0189788	-1115.27
0.319962	0.0111548	-1114.66
0.318201	0.0471755	-1112.31
0.250411	-0.0691852	-1113.22
0.245125	-0.0611667	-1111.14
0.184263	-0.022171	-1111.53
0.176735	0.0561368	-1110.38
0.282329	-0.112207	-1110.21
0.245355	0.246294	-1114.06
0.19854	0.281238	-1113.53
0.220797	0.275293	-1112.18
0.175264	0.246824	-1111.4
0.323257	0.110714	-1109.92
0.295512	0.293821	-1108.71
0.220028	0.129414	-1109.32
0.162538	-0.221475	-1116.7
0.124472	-0.188316	-1107.5
0.161162	0.021967	-1111.87
0.142057	0.20107	-1116.44
0.124524	0.239743	-1116.23
0.116572	0.177522	-1115
0.093537	0.121441	-1115.19
0.148307	0.227514	-1113.37
0.07715	0.22179	-1112.63
-0.185756	-0.195457	-1115.81
-0.0977278	-0.266117	-1110.81
-0.133233	-0.246612	-1113.03
-0.168728	-0.20481	-1111.86
-0.147344	-0.348805	-1108.6
-0.15633	-0.187313	-1109.48
-0.142398	-0.0429383	-1113.52
-0.116608	0.0501249	-1112.12
-0.174147	-0.0145941	-1108.4
-0.0673501	0.188374	-1118.38
-0.194041	-0.188222	-1114.66
-0.275196	-0.380873	-1109.04
0.393668	-0.302271	-1038.38
0.260015	-0.168826	-1038.38
0.306923	-0.18998	-1032.97
0.282926	-0.322287	-1028.96
0.208355	-0.364393	-1029.22
0.272105	-0.146963	-1038.38
0.245517	-0.00984321	-1038.38
0.212668	0.0934079	-1038.38
0.18288	-0.00667654	-1036.71
0.173647	0.0730203	-1028.71
0.326068	0.144042	-1038.38
0.262806	0.170088	-1038.38
0.232432	0.168873	-1038.38
0.230453	0.118606	-1038.38
0.21875	0.193941	-1038.38
0.206598	0.194344	-1036.36
0.233459	0.103726	-1032.03
0.148025	-0.312484	-1032.1
0.162138	0.0596804	-1038.38
0.143584	0.089142	-1038.38
0.104202	0.0601859	-1038.38
0.0662152	0.0248089	-1038.38
0.0267588	-0.0152994	-1038.38
0.137997	0.0938604	-1032.88
0.111565	0.0387631	-1033.27
0.146876	0.0267214	-1028.11
0.140813	0.0399281	-1028.51
0.0583495	-0.0139452	-1027.67
0.0102097	-0.0680883	-1028.93
0.167781	0.187638	-1038.38
0.0980963	0.0960773	-1038.38
0.104537	0.199588	-1029.23
0.088618	0.176397	-1029.71
-0.133977	-0.188368	-1038.38
-0.140587	-0.326431	-1034.32
-0.121102	-0.162317	-1032.92
-0.079094	-0.190253	-1029.44
-0.0153262	-0.0804484	-1038.38
-0.0316566	0.000735529	-1038.38
-0.0396747	-0.0854588	-1038.38
-0.0482817	-0.146286	-1038.38
-0.0895717	-0.134865	-1038.38
-0.0392605	-0.0757137	-1034.24
-0.0540503	0.00429136	-1033.93
-0.223831	-0.0263235	-1038.38
-0.234669	-0.0783551	-1033
-0.218735	0.205889	-1036.4
0.351964	-0.0214992	-951.696
0.295808	-0.310894	-958.38
0.281434	-0.308677	-958.38
0.238276	-0.220218	-958.38
0.26913	-0.343603	-953.708
0.222488	-0.232956	-954.518
0.294026	-0.0618076	-958.38
0.239087	-0.00891349	-958.38
0.222758	0.0172104	-958.38
0.188198	0.000201203	-958.38
0.273745	-0.170476	-956.193
0.182322	-0.0151412	-955.644
0.287044	0.190971	-958.38
0.236936	0.211387	-958.38
0.2295	0.200746	-958.38
0.222504	0.0862047	-958.38
0.162497	0.226532	-958.38
0.152855	0.0906995	-958.38
0.269532	0.327912	-954.72
0.251745	0.190541	-955.323
0.241223	0.171494	-955.07
0.169058	0.179838	-955.488
0.159422	0.0715746	-956.081
0.265298	0.293764	-951.942
0.198683	0.11505	-952.496
0.124571	0.013807	-958.38
0.00813084	-0.0794041	-953.683
0.0548835	0.00344175	-951.1
0.123424	0.232201	-958.38
0.111563	0.230148	-958.38
0.108727	0.142697	-958.38
0.0862116	0.125072	-958.38
0.080155	0.272494	-958.38
0.0924755	0.256794	-955.008
0.0895973	0.181792	-956.007
0.0736684	0.19962	-956.489
0.140165	0.0917868	-951.788
0.120034	0.171859	-951.379
0.026451	0.157475	-950.565
-0.0973526	-0.212175	-958.38
-0.126112	-0.224663	-958.38
-0.126981	-0.331094	-952.276
-0.0641045	-0.108087	-958.38
-0.0852902	-0.106628	-958.38
-0.0916176	-0.0225819	-958.38
-0.0967113	-0.0232686	-958.38
-0.160013	-0.153482	-958.38
-0.0388794	-0.138088	-954.036
-0.0717433	-0.151012	-955.947
-0.116951	-0.109626	-952.622
-0.147327	0.0843688	-951.924
-0.195786	-0.0464488	-958.38
-0.212174	0.216422	-958.38
0.248539	-0.206298	-878.38
0.257626	-0.344953	-878.38
0.240358	-0.269389	-878.38
0.256312	-0.258188	-875.149
0.288964	-0.290521	-872.359
0.270918	-0.263625	-873.041
0.210374	-0.239559	-870.319
0.272782	-0.0011866	-878.38
0.212018	-0.0273033	-878.38
0.174311	0.0126214	-878.38
0.161471	0.10075	-878.38
0.291496	0.0351682	-871.312
0.17494	0.0825208	-872.41
0.229716	0.0398232	-869.524
0.205505	-0.021227	-869.207
0.294923	0.139927	-878.38
0.269385	0.314863	-878.38
0.281292	0.151023	-878.38
0.279934	0.165394	-878.38
0.26544	0.143968	-878.38
0.237399	0.336908	-878.38
0.246011	0.156775	-878.38
0.240285	0.210577	-878.38
0.230861	0.238099	-878.38
0.222814	0.163544	-878.38
0.214435	0.205781	-878.38
0.171192	0.30241	-878.38
0.169756	0.182434	-878.38
0.132823	-0.183187	-873.937
0.154801	0.0481418	-878.38
0.0570225	0.0847624	-871.761
0.0898539	0.059153	-870.058
0.140739	0.156734	-878.38
0.105232	0.30747	-878.38
0.0819977	0.2452	-878.38
0.116659	0.270429	-875.825
0.101413	0.245277	-874.799
0.0555088	0.235742	-875.419
-0.0688012	-0.228791	-878.38
-0.0440087	-0.0295311	-878.38
-0.0608146	-0.176904	-878.38
-0.0792218	-0.0642334	-878.38
-0.0830976	-0.192268	-878.38
-0.101703	0.00885854	-878.38
-0.101408	-0.155754	-878.38
-0.106587	-0.14851	-878.38
-0.0650082	-0.167187	-874.356
-0.0596916	-0.120815	-870.47
-0.0738109	-0.0384635	-873.462
-0.117123	0.168375	-878.38
-0.194669	0.202631	-878.38
-0.186373	-0.229135	-878.38
-0.266352	0.130161	-878.38
-0.282274	0.23685	-878.38
-0.292088	0.238609	-878.38
0.390892	-0.344038	-1588.66
0.225752	-0.218915	-1595.14
0.168801	-0.254443	-1588.66
0.180067	-0.299621	-1595.14
0.214567	-0.315231	-1591.9
0.128901	-0.00070205	-1595.14
0.0658708	0.00635311	-1591.9
0.0479209	0.0352163	-1591.9
-0.0937293	-0.132615	-1598.38
-0.119882	-0.189541	-1588.66
-0.143956	-0.197936	-1588.66
-0.113601	-0.252076	-1595.14
-0.316788	-0.115491	-1588.66
-0.254092	-0.125288	-1588.66
-0.248137	0.168097	-1591.9
0.141806	0.166172	-1591.9
0.190754	0.217177	-1585.42
0.249781	0.242335	-1591.9
0.274882	0.233599	-1591.9
0.264876	0.196838	-1591.9
0.299798	0.170618	-1595.14
0.345969	0.261268	-1585.42
0.263263	0.142524	-1591.9
0.265979	0.1182	-1595.14
0.288587	0.115417	-1591.9
0.241765	0.0853465	-1585.42
0.238671	0.0991999	-1591.9
0.249863	0.0144861	-1591.9
0.267911	-0.00206722	-1591.9
0.281338	-0.000682358	-1588.66
0.335777	-0.0144807	-1591.9
0.35792	-0.0525055	-1595.14
0.239985	-0.0508722	-1588.66
0.175002	0.103067	-1591.9
0.159013	0.0535203	-1588.66
0.161451	0.132298	-1595.14
0.2271	0.189935	-1595.14
0.164602	0.202236	-1588.66
0.23951	-0.31974	-1588.66
0.21695	0.0603922	-1585.42
-0.235425	0.123736	-1505.42
-0.240241	0.160107	-1511.9
-0.287959	-0.0507098	-1508.66
-0.142681	-0.019216	-1508.66
-0.103528	-0.0555499	-1515.14
-0.0521429	-0.112823	-1505.42
-0.0605381	-0.0844846	-1505.42
-0.10732	-0.160194	-1505.42
-0.119484	-0.170499	-1508.66
-0.12059	-0.130887	-1508.66
-0.14118	-0.152724	-1505.42
-0.148037	-0.215598	-1508.66
-0.172199	-0.215591	-1505.42
0.312387	-0.268367	-1505.42
0.307969	-0.25352	-1508.66
0.275468	-0.25473	-1515.14
0.251079	-0.324394	-1505.42
0.287705	-0.358585	-1511.9
0.299372	-0.395371	-1511.9
0.325089	-0.400257	-1515.14
0.327337	-0.388024	-1515.14
0.418715	-0.357311	-1518.38
0.415646	-0.221519	-1505.42
0.457595	-0.202679	-1511.9
0.428249	-0.166624	-1511.9
0.361187	-0.208199	-1505.42
0.267589	-0.213331	-1508.66
0.264095	-0.124894	-1515.14
0.243467	-0.112418	-1518.38
0.226752	-0.302788	-1511.9
0.24507	-0.347087	-1508.66
0.295408	-0.033892	-1508.66
0.258497	-0.0466417	-1511.9
0.245397	-0.0256242	-1505.42
0.235796	0.00878247	-1515.14
0.299875	0.0235756	-1518.38
0.335076	-0.0807409	-1505.42
0.19215	-0.0370785	-1518.38
0.193801	0.0185534	-1518.38
0.150456	-0.00394797	-1505.42
0.156524	0.0497039	-1505.42
0.197585	0.0492428	-1518.38
0.226238	0.027852	-1518.38
0.249195	0.0520252	-1515.14
0.266922	0.0812044	-1518.38
0.268574	0.0941953	-1508.66
0.23081	0.0742849	-1518.38
0.206091	0.130702	-1508.66
0.15225	0.121631	-1511.9
0.134502	0.0996669	-1511.9
0.120669	0.148547	-1511.9
0.0842814	0.0716825	-1515.14
0.0762735	0.100064	-1515.14
0.0579191	0.103957	-1511.9
0.0384974	0.00707277	-1508.66
0.125238	0.222007	-1518.38
0.190913	0.204654	-1505.42
0.208596	0.234749	-1511.9
0.244816	0.246923	-1505.42
0.240869	0.180144	-1508.66
0.248124	0.160556	-1511.9
0.260805	0.181498	-1505.42
0.273904	0.133409	-1505.42
0.301227	0.155329	-1505.42
0.311292	0.136115	-1518.38
0.338112	0.18757	-1508.66
0.241454	0.147989	-1511.9
0.241369	0.122007	-1511.9
0.258296	0.117992	-1511.9
-0.23938	0.0915099	-1431.9
-0.26259	0.0794179	-1438.38
-0.333924	0.0718007	-1438.38
-0.351927	0.0670805	-1438.38
-0.292015	0.10873	-1431.9
-0.285557	0.129136	-1435.14
-0.331858	0.104947	-1431.9
-0.131889	-0.099443	-1428.66
-0.115772	-0.0842099	-1425.42
-0.0854315	0.0128302	-1435.14
-0.119884	-0.18329	-1431.9
-0.0144034	-0.117414	-1435.14
0.107464	-0.120336	-1435.14
0.0630446	-0.0154114	-1438.38
0.104909	0.197704	-1428.66
0.226003	0.136032	-1431.9
0.24304	0.140026	-1431.9
0.253522	0.0961397	-1435.14
0.263345	0.0430964	-1428.66
0.263248	0.0282167	-1435.14
0.27596	0.0178439	-1438.38
0.276607	-0.00276626	-1438.38
0.214098	-0.0590762	-1428.66
0.186366	-0.0823827	-1428.66
0.2537	-0.0846915	-1435.14
0.260806	-0.0984696	-1428.66
0.226087	-0.0933979	-1425.42
0.211777	-0.126866	-1428.66
0.235703	-0.167687	-1438.38
0.265519	-0.178123	-1431.9
0.270393	-0.192232	-1438.38
0.317343	-0.164521	-1431.9
0.335817	-0.154199	-1431.9
0.341747	-0.0737399	-1428.66
0.36876	-0.0448648	-1431.9
0.138491	0.0514783	-1431.9
0.115984	0.115384	-1431.9
0.171845	0.0468763	-1428.66
0.195261	0.057704	-1431.9
0.252591	0.231715	-1425.42
0.264482	0.184552	-1428.66
0.297602	0.137107	-1438.38
0.293464	0.176379	-1438.38
0.33203	0.0188393	-1435.14
0.290281	0.0534147	-1435.14
0.330478	-0.0178626	-1438.38
0.306375	-0.0305872	-1431.9
0.282122	-0.0773848	-1431.9
0.284736	-0.396077	-1435.14
0.251483	-0.383539	-1428.66
0.207451	-0.391621	-1431.9
0.189834	-0.368744	-1425.42
0.173443	-0.367601	-1435.14
0.152935	-0.344879	-1435.14
0.155138	-0.327855	-1431.9
0.189184	-0.338837	-1428.66
0.171342	-0.0995025	-1438.38
0.162176	-0.107449	-1428.66
0.117055	-0.0179948	-1425.42
0.2334	0.00188859	-1431.9
-0.310057	0.0895227	-1431.9
0.120596	0.250116	-1438.38
-0.263327	0.244051	-1348.66
-0.115595	-0.112404	-1358.38
-0.0931756	-0.169846	-1355.14
-0.152918	-0.180657	-1355.14
-0.0825596	-0.0635492	-1355.14
-0.219443	-0.199917	-1345.42
-0.00342788	-0.0816613	-1355.14
0.0624623	-0.0123254	-1358.38
0.00714926	0.0535914	-1355.14
0.0947968	0.143689	-1355.14
0.128089	0.153094	-1348.66
0.141527	0.177197	-1351.9
0.165399	0.144948	-1351.9
0.143376	0.120595	-1355.14
0.139893	0.096189	-1351.9
0.152624	0.043565	-1351.9
0.160796	0.0345049	-1355.14
0.193109	-0.000934158	-1351.9
0.156863	-0.00500482	-1358.38
0.136799	-0.0237247	-1348.66
0.190312	0.0883502	-1351.9
0.206852	0.0725361	-1351.9
0.223065	0.0821443	-1355.14
0.233253	0.0859475	-1348.66
0.220704	0.105949	-1345.42
0.228916	0.106284	-1355.14
0.241956	0.110585	-1358.38
0.201378	0.14675	-1355.14
0.235875	0.185327	-1355.14
0.242953	0.156292	-1355.14
0.258234	0.154025	-1355.14
0.259402	0.135977	-1355.14
0.229141	0.227667	-1351.9
0.315085	0.153707	-1348.66
0.341486	0.167118	-1345.42
0.367191	0.0395415	-1348.66
0.307293	0.0824774	-1358.38
0.262903	0.0742379	-1348.66
0.262517	0.0893653	-1345.42
0.254242	0.104417	-1351.9
0.291568	0.0479529	-1345.42
0.299522	0.0280917	-1348.66
0.29242	-0.00929895	-1358.38
0.286017	-0.031061	-1351.9
0.309122	-0.0212792	-1355.14
0.239219	0.039834	-1348.66
0.253411	0.028984	-1355.14
0.237512	0.000647662	-1355.14
0.220917	-0.032951	-1348.66
0.201174	-0.0553545	-1355.14
0.218445	-0.0737117	-1355.14
0.208302	-0.0906682	-1348.66
0.0935215	0.0730889	-1348.66
0.269743	-0.111691	-1358.38
0.244519	-0.119937	-1348.66
0.263654	-0.152946	-1355.14
0.281468	-0.190473	-1348.66
0.272156	-0.184883	-1358.38
0.309064	-0.221874	-1355.14
0.313483	-0.120246	-1348.66
0.338141	-0.101672	-1358.38
0.34528	-0.0612623	-1348.66
0.397064	-0.0385311	-1348.66
0.387899	-0.0687685	-1355.14
0.377736	-0.0472924	-1348.66
0.24295	-0.0784401	-1351.9
0.181613	-0.206259	-1345.42
0.191263	-0.26187	-1345.42
0.191909	-0.299918	-1351.9
0.204895	-0.341573	-1351.9
0.231591	-0.348043	-1351.9
0.269719	-0.36164	-1348.66
0.221234	-0.325016	-1355.14
0.254104	-0.254081	-1351.9
0.257407	-0.28137	-1351.9
0.279309	-0.294047	-1355.14
0.389971	-0.285773	-1348.66
0.383026	-0.327734	-1348.66
0.424179	-0.256658	-1351.9
0.33263	0.111743	-1348.66
0.33979	-0.150275	-1271.9
0.391912	-0.121838	-1265.42
0.255913	-0.372179	-1275.14
0.28122	-0.441331	-1268.66
0.218397	-0.217456	-1278.38
0.222629	-0.190333	-1271.9
0.252738	-0.140259	-1275.14
0.272075	-0.135914	-1268.66
0.281667	-0.0806191	-1278.38
0.298214	-0.0924546	-1271.9
0.295919	-0.071005	-1265.42
0.294831	-0.0444963	-1271.9
0.281193	-0.0135387	-1268.66
0.335307	0.00186053	-1268.66
0.332152	0.0407097	-1268.66
0.243304	-0.085564	-1271.9
0.228974	-0.110428	-1275.14
0.220194	-0.123699	-1275.14
0.217727	-0.0778342	-1275.14
0.168966	-0.054595	-1275.14
-0.301409	0.198008	-1275.14
-0.142804	-0.117636	-1271.9
-0.141748	-0.151233	-1275.14
-0.16562	-0.240315	-1271.9
0.0831497	-0.172234	-1275.14
0.0605999	-0.0343242	-1275.14
0.042509	-0.00055397	-1278.38
0.0534954	0.0241541	-1271.9
0.116514	0.00150941	-1275.14
0.137064	-0.0108178	-1278.38
0.126134	-0.0304386	-1271.9
0.123182	0.0493966	-1271.9
0.112701	0.0557449	-1278.38
0.103206	0.0680458	-1268.66
0.117364	0.114119	-1271.9
0.0852633	0.164201	-1268.66
0.0729904	0.173466	-1275.14
0.0936751	0.224842	-1278.38
0.150466	0.13024	-1268.66
0.190839	0.13012	-1268.66
0.179251	0.169577	-1268.66
0.195253	0.170903	-1265.42
0.218772	0.141676	-1278.38
0.261223	0.155233	-1275.14
0.264551	0.178385	-1275.14
0.275963	0.187916	-1275.14
0.270372	0.204235	-1271.9
0.285597	0.201944	-1271.9
0.329926	0.206427	-1275.14
0.268205	0.106144	-1271.9
0.244207	0.075611	-1268.66
0.237854	0.063735	-1271.9
0.220965	0.0675295	-1268.66
0.212615	0.0457243	-1265.42
0.142972	0.0838964	-1268.66
0.223923	0.0116729	-1268.66
0.200806	-0.00381299	-1275.14
0.240528	-0.00932121	-1275.14
0.265975	0.0964593	-1275.14
0.282308	0.135379	-1268.66
0.240243	0.133839	-1271.9
0.114426	0.278384	-1275.14
0.305253	-0.245662	-1275.14
-0.209164	-0.0637872	-1195.14
-0.13984	-0.103066	-1188.66
-0.0861245	-0.0991717	-1191.9
-0.114245	-0.150185	-1191.9
-0.140798	-0.150611	-1191.9
-0.159654	-0.148008	-1188.66
-0.150447	-0.178749	-1185.42
-0.175312	-0.18947	-1188.66
-0.215015	-0.288341	-1195.14
-0.108124	-0.197852	-1195.14
-0.21306	0.252594	-1195.14
-0.0987344	0.165099	-1188.66
-0.207852	0.240258	-1195.14
0.099875	0.226858	-1198.38
0.0509949	0.178422	-1195.14
0.130138	0.200153	-1191.9
0.191816	0.199644	-1195.14
0.263335	0.187105	-1191.9
0.232568	0.160001	-1188.66
0.254558	0.102037	-1195.14
0.265847	0.103127	-1191.9
0.274462	0.102208	-1191.9
0.298385	0.176575	-1195.14
0.299035	0.0366611	-1195.14
0.31236	0.0428712	-1195.14
0.222966	0.0581558	-1191.9
0.23556	0.057181	-1191.9
0.198619	0.0788321	-1195.14
0.144045	0.0596058	-1195.14
0.103018	0.0697707	-1195.14
0.0951822	0.0826712	-1195.14
0.110597	0.0985434	-1188.66
0.0736073	0.0465475	-1198.38
0.0588489	0.0284636	-1191.9
0.0432583	-0.00589963	-1195.14
0.00358645	-0.060541	-1188.66
0.0756944	-0.0128107	-1191.9
0.0804137	-0.00553467	-1188.66
0.0858569	0.0085498	-1188.66
0.171219	-0.0121223	-1188.66
0.163018	0.0318094	-1191.9
0.222109	-0.0304573	-1188.66
0.22557	-0.0152461	-1195.14
0.254729	-0.0186122	-1188.66
0.264121	-0.0079916	-1188.66
0.236401	-0.0605843	-1188.66
0.19478	-0.0432349	-1195.14
0.182095	-0.0518455	-1191.9
0.191882	-0.0680957	-1191.9
0.193367	-0.118776	-1191.9
0.148185	-0.126616	-1191.9
0.211975	-0.114851	-1195.14
0.239837	-0.114792	-1191.9
0.255982	-0.0913069	-1198.38
0.310512	-0.0781256	-1191.9
0.301084	-0.025467	-1195.14
0.327383	-0.0495197	-1188.66
0.355763	-0.0637158	-1188.66
0.406693	-0.210332	-1195.14
0.383664	-0.390838	-1198.38
0.35735	-0.368993	-1198.38
0.250065	-0.352543	-1195.14
0.23007	-0.362592	-1191.9
0.215656	-0.345081	-1188.66
0.172611	-0.271922	-1185.42
0.18649	0.0590146	-1195.14
0.220755	0.0346517	-1188.66
0.114614	-0.100836	-1191.9
0.0582826	-0.229374	-1188.66
-0.20483	0.125793	-1108.66
-0.140198	-0.0666463	-1111.9
-0.143091	-0.147874	-1111.9
-0.138172	-0.186381	-1108.66
-0.10477	-0.187165	-1111.9
-0.107404	-0.12098	-1115.14
-0.0406594	-0.0873819	-1115.14
-0.00849785	-0.0502102	-1108.66
-0.235628	0.0330096	-1111.9
0.0376539	-0.0123773	-1115.14
0.0447946	0.0173269	-1115.14
0.0285262	0.0287103	-1115.14
0.0295553	0.0559695	-1118.38
0.0488306	0.0894403	-1115.14
0.0353888	0.0897227	-1115.14
0.097387	0.148829	-1118.38
0.11328	0.155189	-1115.14
0.135262	0.133594	-1118.38
0.149152	0.140646	-1108.66
0.147897	0.121337	-1115.14
0.13275	0.11496	-1118.38
0.116921	0.0973544	-1115.14
0.102403	0.0592364	-1108.66
0.112073	0.0564852	-1108.66
0.121149	0.0284653	-1115.14
0.132227	0.019739	-1115.14
0.153175	0.0141028	-1111.9
0.151144	0.028585	-1111.9
0.167672	0.0350333	-1111.9
0.14427	0.0695001	-1111.9
0.185581	0.0415529	-1115.14
0.211427	0.0724379	-1115.14
0.211575	0.0826276	-1115.14
0.230966	0.0805216	-1115.14
0.243549	0.0803579	-1118.38
0.250554	0.0997468	-1118.38
0.242699	0.116799	-1115.14
0.222806	0.143648	-1118.38
0.20721	0.149921	-1118.38
0.202515	0.178799	-1115.14
0.266033	0.129051	-1115.14
0.287215	0.139548	-1111.9
0.286684	0.11078	-1115.14
0.316022	0.0813855	-1118.38
0.315962	0.0693949	-1115.14
0.327416	0.0351788	-1115.14
0.297291	0.0775314	-1118.38
0.260931	0.0271305	-1111.9
0.246567	0.03103	-1118.38
0.222858	0.0287788	-1111.9
0.220993	0.0110811	-1115.14
0.242674	0.0123248	-1115.14
0.196226	0.0031069	-1115.14
0.173875	-0.00083712	-1111.9
0.205615	-0.02922	-1111.9
0.217676	-0.0296036	-1108.66
0.163715	-0.0816327	-1115.14
0.139268	-0.057917	-1118.38
0.104374	-0.09769	-1118.38
0.221413	-0.068195	-1115.14
0.234807	-0.0805949	-1111.9
0.275157	-0.07967	-1111.9
0.278987	-0.0555677	-1118.38
0.264	-0.0288148	-1108.66
0.297842	-0.0505741	-1115.14
0.306976	-0.0378741	-1115.14
0.324774	-0.0474996	-1115.14
0.33244	-0.0329222	-1115.14
0.349302	-0.00944321	-1111.9
0.387668	0.0255207	-1118.38
0.280958	0.017367	-1111.9
0.37287	-0.0817871	-1115.14
0.260765	-0.150336	-1111.9
0.253268	-0.216658	-1108.66
0.31495	-0.111816	-1115.14
0.41768	-0.241282	-1118.38
0.321029	-0.383021	-1115.14
0.242157	-0.368425	-1111.9
0.370741	-0.185002	-1115.14
-0.227757	-0.158466	-1031.9
-0.177322	-0.0215282	-1025.42
-0.124904	-0.124016	-1035.14
-0.108454	-0.110492	-1028.66
-0.102825	-0.097985	-1025.42
-0.060047	-0.108435	-1028.66
-0.00748495	-0.0588226	-1035.14
-0.119525	-0.175111	-1035.14
-0.145318	-0.239505	-1031.9
0.111259	-0.277287	-1031.9
0.199751	-0.342041	-1028.66
0.202315	-0.332447	-1038.38
0.234644	-0.358154	-1035.14
0.250839	-0.374854	-1038.38
0.290724	-0.393147	-1031.9
0.390627	-0.395303	-1035.14
0.322272	-0.210146	-1038.38
0.395449	-0.161784	-1038.38
0.414989	-0.159428	-1031.9
0.391055	-0.130745	-1031.9
0.357907	-0.103166	-1038.38
0.345529	-0.145241	-1035.14
0.30747	-0.102742	-1031.9
0.26882	-0.10911	-1031.9
0.237986	-0.146445	-1031.9
0.248904	-0.148056	-1038.38
0.263072	-0.160798	-1038.38
0.26443	-0.216474	-1028.66
0.209713	-0.0488897	-1035.14
0.222573	-0.0310943	-1035.14
0.238641	-0.0255031	-1031.9
0.273354	-0.0160143	-1028.66
0.290501	-0.0288436	-1038.38
0.349754	-0.0621889	-1035.14
0.326624	-0.0240906	-1038.38
0.282254	0.00121419	-1031.9
0.26003	0.000975052	-1038.38
0.232525	0.0128442	-1028.66
0.226355	0.0474641	-1031.9
0.217172	0.0642847	-1031.9
0.230151	0.0641775	-1031.9
0.217925	0.0579395	-1038.38
0.258664	0.0774278	-1035.14
0.255398	0.0653674	-1031.9
0.275326	0.0674297	-1035.14
0.282627	0.0803097	-1031.9
0.281414	0.10757	-1031.9
0.294625	0.0982176	-1038.38
0.330626	0.0618135	-1038.38
0.322341	0.0459222	-1035.14
0.342644	0.0435995	-1031.9
0.332588	0.0780364	-1035.14
0.324165	0.134117	-1038.38
0.342193	0.16835	-1035.14
0.301544	0.190562	-1038.38
0.241463	0.157852	-1035.14
0.228086	0.125186	-1031.9
0.209864	0.126484	-1031.9
0.233298	0.0934859	-1035.14
0.169068	0.154035	-1031.9
0.150958	0.0924808	-1035.14
0.120549	0.15103	-1031.9
0.0914617	0.132091	-1035.14
0.0848557	0.178507	-1035.14
0.119674	0.0977907	-1031.9
0.09619	0.0841477	-1035.14
0.120716	0.0723639	-1035.14
0.137515	0.0738745	-1035.14
0.151321	0.0677405	-1038.38
0.163684	0.0668854	-1038.38
0.185769	0.068241	-1035.14
0.149376	0.0280204	-1031.9
0.139984	0.0017872	-1038.38
0.175039	-0.0117759	-1035.14
0.195658	-0.00852791	-1035.14
0.138262	-0.0445956	-1031.9
0.127777	-0.0614357	-1038.38
0.154323	-0.105665	-1038.38
0.064745	0.0221898	-1028.66
0.0565845	-0.00264507	-1035.14
0.0558325	-0.0153698	-1035.14
0.0513306	0.0154916	-1031.9
0.0148623	0.0458081	-1035.14
-0.00805396	0.0515707	-1035.14
0.0218398	-0.0113891	-1038.38
0.104207	0.0331698	-1038.38
0.0833003	0.0364978	-1038.38
0.191403	0.174902	-1035.14
-0.320386	0.196779	-945.42
-0.265861	0.209804	-945.42
0.183279	0.182389	-948.66
0.201364	0.146806	-951.9
0.228117	0.128585	-955.14
0.286187	0.171605	-948.66
0.277059	0.204526	-951.9
0.31883	0.174226	-951.9
0.328036	0.162375	-948.66
0.286464	0.132195	-955.14
0.293183	0.117601	-955.14
0.290056	0.101489	-948.66
0.327072	0.0957282	-958.38
0.367357	0.0922416	-951.9
0.383777	0.097809	-948.66
0.344937	0.043919	-955.14
0.274354	0.0523718	-948.66
0.238267	0.0514788	-955.14
0.247243	0.071669	-951.9
0.213381	0.0909195	-958.38
[truncated: 136 more rows]
