# Supplementary material for: Spinal premotor interneurons controlling antagonistic muscles are spatially intermingled
Source: eLife. 2022 Dec 13;11:e81976. doi: 10.7554/eLife.81976 (PMC9844990; doi:10.7554/eLife.81976)
Supplement: Figure 3—figure supplement 1—source data 4. [file elife-81976-fig3-figsupp1-data4.xlsx]

## Sheet: Sheet1
0.22694	0.177756	-698
0.280448	-0.0355109	-704
0.324006	-0.0897936	-724
0.303253	0.0139962	-690
-0.116992	-0.163287	-690
-0.127041	-0.138245	-694
-0.051294	-0.0749176	-700
-0.0689901	-0.124739	-702
-0.213244	-0.0279129	-704
0.234017	0.230221	-706
0.204841	0.0674292	-706
0.165831	0.119085	-708
0.128165	0.125295	-708
0.155322	0.0896125	-712
0.173765	0.0759	-708
0.195629	0.136981	-710
0.229643	0.132797	-722
0.261025	0.103737	-722
0.25412	0.145212	-722
0.266806	0.226031	-724
0.164812	0.213967	-728
0.230677	0.111459	-726
0.243176	0.12083	-736
0.207798	0.143501	-702
0.286512	0.0587799	-694
0.200481	0.111521	-728
0.229102	0.138788	-714
0.222929	0.127638	-714
0.162247	0.171785	-710
0.258173	0.0393583	-710
0.0451639	0.104369	-480
0.303505	0.00731657	-446
0.105282	0.243192	-446
0.165649	0.176553	-448
0.199462	0.124073	-450
0.242755	0.115361	-452
0.185006	0.165561	-456
0.158562	0.0209055	-454
0.209832	-0.00166254	-456
0.195591	-0.071936	-452
0.162342	0.0331616	-456
0.229184	-0.0503847	-470
0.235103	-0.0241687	-470
0.182359	-0.00809288	-470
0.338964	-0.14763	-470
0.277095	-0.255146	-474
0.207942	-0.231884	-478
-0.0948108	-0.113449	-476
-0.0564091	-0.158818	-480
-0.106769	-0.150964	-480
0.211131	0.193298	-480
0.222602	0.16625	-480
0.247769	0.148458	-478
0.130841	0.113188	-478
0.25113	0.0625939	-474
0.175111	0.125785	-460
0.174689	0.0876575	-462
0.223863	0.172848	-460
0.1903	0.0205581	-476
0.186506	0.0672449	-448
0.126872	0.0416066	-448
0.120978	0.072984	-450
0.178307	0.151899	-446
0.196194	0.151194	-448
0.195359	0.102239	-446
0.12442	0.0997946	-452
0.111562	0.0453612	-470
0.296265	0.0720109	-476
0.205624	0.206807	-480
0.29934	0.00995341	-208
0.281227	-0.00154014	-222
0.263777	-0.102668	-226
0.29836	-0.141547	-236
0.260717	-0.243786	-242
0.177367	-0.149493	-250
0.326637	-0.292656	-246
0.279493	-0.135792	-242
-0.105827	-0.132584	-234
0.0868502	0.188944	-230
0.27878	0.114695	-226
0.279552	0.0252612	-220
0.188672	0.0156499	-220
0.255595	0.16633	-222
0.18741	0.181462	-214
0.15501	0.112753	-216
0.149223	0.0468525	-210
0.00181701	0.0521339	-212
0.117551	0.0153457	-214
0.149629	0.217894	-242
0.232211	0.214399	-214
0.27122	0.205681	-218
0.294598	0.0422184	-216
0.285662	0.0785601	-220
0.262863	0.0762754	-222
0.238152	0.131199	-224
0.239811	0.118015	-228
0.194272	0.132752	-230
0.0874938	0.170026	-240
0.0960392	0.132823	-242
0.09848	0.0849935	-240
0.189667	0.112093	-236
0.125077	0.0572729	-240
0.155169	0.0305619	-242
0.226211	0.0659004	-244
0.131394	0.0656415	-242
0.219383	-0.0304325	-208
0.103129	-0.190219	-214
0.223572	-0.246974	-222
0.255104	-0.299458	-228
0.252169	-0.107575	-228
0.309531	-0.147405	-212
0.324755	-0.166194	-4
0.228966	0.0462981	-690
0.275549	-0.0505016	-690
0.0211497	0.0343551	-706
0.365328	0.155629	-690
-0.0549691	-0.142044	-696
0.123494	0.0831419	-702
0.203181	0.0893775	-702
0.196733	0.206955	-704
0.219021	0.115726	-700
0.286117	0.228081	-710
0.32856	0.125091	-712
0.141034	0.0910025	-708
0.194354	0.0832099	-716
0.194154	0.031352	-716
0.285542	-0.0970265	-720
0.294045	-0.0554632	-712
0.174809	-0.0343678	-702
0.242015	-0.117018	-720
0.269747	-0.013537	-720
0.228819	-0.337473	-722
0.219306	-0.327859	-706
-0.240584	0.17789	-712
-0.0685841	-0.153179	-688
0.0286987	-0.0405748	-688
0.127493	0.239145	-720
0.166542	0.0998247	-714
0.234217	0.152499	-698
0.260049	0.160673	-700
0.234913	0.161423	-716
0.276086	0.149022	-690
0.207726	0.0849211	-710
0.195464	0.110396	-470
0.108179	0.280897	-484
0.194233	0.141402	-462
0.266198	0.196754	-450
0.246432	0.160799	-460
0.261223	0.156362	-462
0.281846	0.285973	-466
0.0874829	0.180477	-478
0.163888	0.134658	-452
0.214467	0.0877603	-454
0.217313	0.132653	-456
0.171741	0.377245	-456
0.152686	0.0355556	-462
0.229543	0.0129758	-468
0.136098	-0.011034	-470
0.138357	0.0617245	-480
0.253838	0.05449	-482
0.207861	-0.196088	-482
0.225851	-0.203708	-480
0.315395	-0.176656	-466
0.352201	0.0354925	-468
-0.0476687	-0.0602931	-470
-0.134517	-0.0735163	-476
-0.0582759	-0.0684586	-480
0.0911115	0.107636	-260
0.159693	0.119921	-226
0.23674	0.0839578	-234
0.177695	0.0988846	-240
0.229929	0.104981	-240
0.20656	0.139746	-242
0.0719582	0.234285	-242
0.096158	0.195733	-250
0.205937	0.183461	-252
0.174908	0.123607	-254
0.18767	0.109765	-258
0.169852	0.151372	-264
0.315782	0.122064	-264
0.152255	0.0330614	-260
0.131927	0.0203972	-260
0.180747	-0.115974	-258
0.190307	0.0223936	-246
0.218879	0.0425712	-244
0.2132	0.0497252	-242
0.240315	-0.25769	-238
0.178209	-0.19765	-236
0.262473	-0.269895	-232
0.336657	-0.206221	-222
0.275528	-0.0963425	-222
0.190698	-0.235616	-220
0.303769	-0.0321563	-232
-0.123447	-0.166671	-226
0.26659	-0.00968283	-224
0.0426741	0.0199123	-210
0.0937452	0.0399497	-230
0.0552567	0.0299146	-264
0.272731	0.168018	-2
0.327242	0.14573	-2
0.128811	0.0103055	-8
-0.261569	0.264694	-698
0.0914257	0.0753568	-694
-0.0339895	-0.0888684	-704
-0.0598256	-0.10006	-704
-0.0667987	-0.129332	-706
0.0779127	0.0612538	-704
0.0413482	0.0692542	-710
-0.13314	-0.0610848	-716
-0.0839339	-0.100794	-718
-0.0558226	-0.114579	-718
0.0690548	0.0825643	-718
0.091164	0.0606494	-718
0.136934	-0.105376	-718
-0.107638	-0.171712	-718
0.214185	-0.199041	-714
0.245776	-0.153853	-714
0.225266	-0.125283	-718
0.22836	-0.111154	-714
0.231587	-0.0430369	-716
0.190653	-0.154041	-710
0.168843	-0.115326	-706
0.144707	0.042062	-698
0.125787	0.0965243	-694
0.128814	0.0872111	-700
0.139062	0.0741805	-696
0.187135	0.0839811	-696
0.185717	0.0974472	-694
0.205917	0.121513	-694
0.0948575	0.0820314	-702
0.156478	0.0314815	-716
0.132407	0.0161177	-716
0.180595	0.0824213	-716
0.195032	0.0486391	-714
0.143293	-0.00429589	-708
0.196783	0.0206086	-716
0.215818	0.0489965	-702
0.175012	0.094893	-706
0.198111	0.0819989	-710
0.278342	0.0643409	-690
0.23668	0.105012	-692
0.290432	0.024976	-698
0.313969	0.0301817	-698
0.22658	0.0331583	-698
0.270417	0.0281475	-694
0.232858	0.0965698	-704
0.251473	0.0181844	-704
0.298566	-0.0170016	-708
0.240578	0.108034	-708
0.305568	0.00725947	-708
0.309866	0.0789833	-712
0.282554	0.0481972	-712
0.261021	-0.0109055	-716
0.269313	-0.00390595	-716
0.263339	-0.000311956	-714
0.258237	-0.163842	-700
0.343937	-0.148822	-700
0.113963	0.273793	-692
0.203171	0.163322	-712
0.208264	0.14027	-706
0.209606	0.165694	-704
0.208626	0.180518	-700
0.163784	0.179017	-706
0.102692	0.189533	-702
0.0872038	0.131034	-692
0.0866707	0.154334	-716
0.0798357	0.169431	-706
0.0837911	0.188785	-694
0.0810828	0.126225	-710
0.0844336	0.121585	-718
0.0567889	0.156816	-712
0.229302	-0.257701	-700
0.254224	-0.279187	-700
0.141838	0.0331414	-450
0.195008	0.0861231	-448
0.192757	0.110384	-450
0.215633	0.105143	-450
0.227706	0.0518717	-446
0.2393	0.0577451	-448
0.255844	0.155353	-450
0.24229	0.111716	-454
0.27803	0.103851	-456
0.217279	0.0839904	-454
0.254819	0.0414772	-454
0.196283	0.0287884	-452
0.155897	-0.00588686	-450
0.168671	0.0241799	-452
0.127434	0.0661616	-450
0.138577	0.0831225	-450
0.141893	0.0592387	-450
0.234718	0.0343995	-446
0.181024	0.0944926	-454
0.177183	0.198216	-454
0.274074	0.232588	-458
0.210662	0.123846	-458
0.128995	0.136246	-458
0.0945555	0.132559	-460
0.118667	0.0418539	-458
0.209772	0.0258686	-460
0.234988	0.0886932	-460
0.268883	0.0287884	-460
0.120307	0.162336	-462
0.283487	0.193977	-466
0.29766	0.18951	-468
0.244021	0.199508	-470
0.225921	0.166548	-470
0.220525	0.155184	-472
0.172572	0.130117	-472
0.237399	0.115362	-472
0.22207	0.10332	-466
0.200919	0.121182	-466
0.193277	0.144824	-466
0.189886	0.101698	-466
0.29641	0.0484539	-470
0.121178	0.0895207	-470
0.127374	0.132868	-472
0.131711	0.185783	-474
0.16768	0.0146263	-472
0.193482	0.0549059	-472
0.239445	0.0511518	-474
0.216759	0.0710259	-474
0.228952	0.10114	-472
0.18593	0.0458503	-468
0.165275	0.052383	-466
0.1478	0.0787023	-466
0.202075	0.0400374	-466
0.194743	0.0640424	-466
0.234853	0.132364	-462
0.264776	0.0938198	-474
0.101827	0.191824	-448
0.0572405	0.159389	-458
0.0615816	0.167308	-456
0.118677	0.317958	-462
0.0619917	0.143108	-462
0.0793514	0.0911018	-472
0.0713343	0.0718467	-474
0.113856	0.239276	-466
0.077866	0.0975739	-466
0.102158	0.0534124	-474
0.127304	-0.0457359	-470
-0.0384704	0.0017156	-466
0.156577	-0.0831831	-464
0.189471	-0.0365995	-466
-0.0788763	-2.69114e-05	-458
0.114596	-0.00842326	-456
0.184125	0.0033101	-454
0.0565553	0.0275842	-450
0.0986016	0.0426613	-450
0.0684135	0.036512	-472
0.105574	-0.010482	-470
0.218349	-0.063531	-448
0.194152	-0.100245	-454
0.164754	0.0367139	-468
0.304222	-0.0891641	-452
0.209392	-0.11991	-452
0.319801	-0.0663635	-454
0.278035	-0.0161536	-456
0.244971	-0.0244288	-456
0.233243	-0.0211053	-458
0.178793	-0.0196049	-462
0.317901	0.0269787	-458
0.27697	0.0214618	-468
0.25921	-0.0626968	-466
0.245976	-0.0498062	-470
0.234528	-0.137026	-474
0.368459	-0.107894	-454
0.282801	-0.241678	-452
0.278825	-0.199238	-454
0.206211	-0.203336	-456
0.247557	-0.191656	-460
0.287923	-0.216408	-456
0.216388	-0.220122	-462
0.249512	-0.279529	-464
0.296895	-0.245573	-472
0.336551	-0.244672	-470
0.327723	-0.261067	-470
0.210632	-0.215062	-474
-0.18474	0.231781	-458
-0.107359	0.174332	-458
-0.118267	-0.150818	-448
-0.0576606	-0.0950375	-452
-0.156992	-0.136003	-458
-0.0633471	-0.140161	-458
-0.0977764	-0.101678	-462
-0.07418	-0.11882	-466
-0.111485	-0.123873	-468
-0.101993	-0.15437	-468
-0.0769192	-0.101	-206
-0.0509132	-0.101741	-206
-0.0764556	-0.0836134	-208
-0.0779483	-0.0431901	-208
-0.114533	-0.102233	-216
-0.0854673	-0.0788504	-216
-0.0762424	-0.15649	-216
-0.0945485	-0.155279	-220
-0.124258	-0.116595	-222
-0.052035	-0.128403	-224
-0.0916002	-0.0385592	-228
-0.0367653	-0.0824098	-230
-0.0239802	-0.0881856	-230
-0.0611904	-0.10566	-232
-0.152587	-0.161833	-228
-0.0197571	-0.143148	-202
0.0410022	0.00546023	-226
0.0656175	-0.00319247	-200
0.0312118	0.185486	-200
0.0406082	0.11352	-202
0.0184128	0.0960384	-206
0.0325005	0.0817347	-210
0.00982292	0.0878481	-216
0.127146	0.188216	-198
0.0777536	0.164585	-200
0.114574	0.175344	-208
0.116985	0.1077	-208
0.143835	0.122562	-210
0.0672631	0.142546	-210
0.0813972	0.182367	-212
0.0972511	0.156446	-216
0.0599295	0.163521	-222
0.139074	0.167476	-222
0.0830336	0.123963	-228
0.133548	0.139133	-228
0.154158	0.112559	-228
0.144159	0.249754	-226
0.155275	0.18349	-204
0.104677	0.0395793	-204
0.0999258	0.0640036	-204
0.112298	0.0711811	-204
0.124801	0.0570902	-204
0.224115	0.0850079	-204
0.204325	0.221873	-204
0.166336	0.151639	-212
0.075255	0.175109	-216
0.0890784	0.0672474	-216
-0.064542	0.256645	-218
0.101887	0.391449	-214
0.11082	0.305494	-218
0.0318932	0.296709	-198
0.12137	0.314433	-196
0.180095	-0.0136359	-198
0.14421	0.0792541	-198
0.165223	0.0516814	-200
0.159582	0.00887287	-206
0.16953	0.0421773	-208
0.150348	-0.00530611	-210
0.105438	-0.0232574	-212
0.0984517	0.0396674	-216
0.0689505	0.0259581	-220
0.0835064	0.0528189	-224
0.144423	-0.0616698	-230
0.135087	-0.0275213	-230
0.182904	0.00874811	-230
0.149054	0.0269929	-228
0.160036	0.0705353	-228
0.129283	-0.0166229	-220
0.178259	-0.059424	-232
0.115038	-0.144204	-234
0.146959	-0.112353	-234
0.222868	-0.32197	-244
0.191419	-0.132293	-240
0.221908	-0.20674	-238
0.223248	-0.184914	-232
0.222487	-0.234394	-230
0.242574	-0.111142	-208
0.199462	-0.0898736	-208
0.196769	-0.0687666	-208
0.327304	-0.225572	-208
0.303973	-0.136909	-232
0.294516	-0.033943	-228
0.277911	-0.0337155	-220
0.25547	-0.0291579	-214
0.236339	-0.352067	-226
0.253454	-0.236896	-244
0.318366	-0.0152285	-202
0.233599	-0.11076	-214
0.278982	-0.0621101	-196
0.191767	-0.035308	-200
0.201354	-0.00292827	-208
0.194581	-0.118848	-244
0.257463	0.0511163	-224
0.229663	0.131919	-188
0.22888	0.145724	-188
0.198109	0.0509401	-190
0.273609	0.0447387	-194
0.259318	0.0627926	-194
0.265645	0.0819181	-190
0.199518	0.0676658	-190
0.178046	0.0808907	-190
0.190455	0.131589	-206
0.20566	0.109704	-222
0.224003	0.149606	-206
0.273966	0.124785	-202
0.206879	0.0908424	-198
0.203393	0.00751516	-196
0.172923	0.0690161	-210
0.189408	-0.0328128	-212
0.183659	0.169737	-190
0.177962	0.181142	-192
0.20496	0.138164	-216
0.179172	0.160189	-212
0.197997	0.188261	-210
0.196134	0.217844	-208
-0.168496	-0.101418	-224
0.150454	0.159088	-204
0.143478	0.155668	-220
0.239236	0.0839437	-236
0.087555	0.18608	-618
0.0778595	0.213291	-606
0.117519	0.231494	-620
0.134431	0.315998	-614
0.138067	0.323981	-614
0.114974	0.212006	-608
0.11283	0.220889	-604
0.256369	0.19136	-604
0.215811	0.195614	-600
0.163325	0.186231	-596
0.147038	0.15762	-574
0.0887834	0.142271	-574
0.0671496	0.0984713	-580
0.188172	0.132059	-578
0.113905	0.168965	-578
0.153224	0.202053	-580
0.184169	0.115524	-582
0.100661	0.038609	-584
0.128793	0.0863062	-584
-0.0632451	0.0331508	-584
0.170185	0.0688256	-592
0.162047	-0.0971068	-592
0.304594	-0.0510417	-596
0.185387	0.0316346	-598
0.321589	-0.0268364	-598
0.271604	0.0797242	-598
0.229926	0.0624398	-598
0.254132	0.0198798	-598
0.211046	-0.0307249	-598
0.186769	0.0373337	-600
0.189768	-0.0105954	-602
0.285275	-0.0440494	-604
0.26686	0.0793675	-612
0.278327	0.0751133	-612
0.30262	0.0778781	-616
0.28499	-0.0130035	-618
0.189549	-0.199743	-618
0.235909	-0.261041	-618
0.265522	-0.268836	-616
0.0629259	0.15845	-616
-0.180683	-0.222066	-616
-0.139487	-0.175486	-616
0.12782	0.0436419	-614
-0.0318677	-0.10552	-610
0.0445344	0.0201153	-610
0.0611958	0.0128687	-610
0.0906931	0.175218	-602
0.122058	0.0788083	-602
0.159026	0.122493	-592
0.226899	0.03725	-586
0.315286	0.0225308	-586
0.301693	0.0574994	-588
0.328704	-0.0380198	-590
0.239481	0.0958159	-584
0.276317	0.170337	-582
0.248233	0.163966	-582
0.256497	0.115974	-582
0.198937	0.193624	-578
0.217667	0.0101989	-586
0.202291	0.160816	-604
0.207434	0.125975	-604
0.212614	0.108105	-596
0.269005	-0.00873686	-602
0.21819	0.202728	-608
0.0995926	0.228733	-608
0.0878466	0.261174	-582
0.209159	0.252973	-606
0.22135	-0.31701	-580
0.041173	0.0503226	-588
-0.261377	0.232413	-580
-0.103598	-0.0956947	-588
-0.103995	-0.130259	-598
-0.0489906	-0.105321	-588
-0.188662	-0.0808581	-592
-0.162466	-0.121101	-590
-0.114807	-0.147846	-598
-0.0462073	-0.0981179	-120
0.226459	-0.248528	-120
0.229509	-0.266464	-120
0.19959	-0.0441456	-120
0.135341	-0.0119079	-120
0.169535	0.00190289	-120
0.176509	-0.0770449	-120
0.206217	0.000408825	-120
0.188678	0.0357833	-120
0.180438	0.118284	-120
0.168209	0.0853552	-120
0.135024	-0.0665418	-136
0.150022	0.0669134	-120
0.20592	-0.0558157	-124
0.186889	0.0115512	-102
0.0604307	-0.0112761	-100
0.0716597	0.0269899	-98
0.110979	0.118121	-104
0.188446	0.0956278	-94
0.203946	-0.237445	-94
0.0769049	0.0800702	-98
0.13094	0.0633232	-106
0.0942232	0.110234	-106
0.133924	-0.169692	-104
0.118475	0.0435733	-104
0.196224	0.0205527	-96
0.111084	-0.0180701	-96
0.215733	0.0621042	-94
0.262653	0.0910192	-94
0.078377	0.0291455	-94
0.242185	-0.0196013	-94
0.255881	0.0282758	-94
0.0791457	0.153621	-94
0.366699	-0.155933	-94
0.241798	-0.113066	-94
0.265462	-0.154499	-94
0.267567	-0.0852585	-110
0.312855	0.0100125	-112
0.304319	-0.00726221	-124
0.217883	0.0445099	-130
0.277726	0.102726	-128
0.257795	0.109647	-116
0.249189	0.104094	-116
0.210879	0.156416	-136
0.228022	0.135425	-136
0.192149	0.150418	-136
0.246481	0.0470371	-136
0.226962	-0.0687123	-136
0.262558	-0.182091	-134
0.228469	-0.0960738	-134
0.340659	0.0820177	-136
0.347275	0.0865965	-126
0.24522	0.0936357	-126
0.220204	-0.0121384	-122
0.268029	0.232131	-102
0.221812	0.137395	-102
0.305052	0.243704	-120
0.175665	0.238545	-126
0.173389	0.188922	-116
0.115541	0.241712	-108
0.123941	0.177616	-98
0.0520956	-0.02531	-92
-0.120706	-0.150998	-110
0.244898	0.132415	-110
0.229891	0.0916065	-106
0.258589	0.0449856	-118
0.274757	-0.300568	-132
-0.328213	0.17268	-134
-0.0786028	0.0543028	-94
-0.141353	-0.123452	-96
-0.139226	-0.205851	-96
-0.0982204	-0.203275	-116
-0.0894091	0.0101753	-132
-0.189874	-0.209097	-130
0.0622098	0.00846657	-110
0.0407963	-0.0222398	-96
-0.046179	-0.14698	-92
-0.128614	-0.189201	-96
0.186405	-0.298185	-90
0.274972	-0.296965	-90
0.254671	-0.33151	-104
0.310911	-0.394906	-98
0.321493	-0.341153	-104
0.180971	-0.293428	-108
0.32582	-0.249257	-104
0.255645	-0.15664	-106
0.186915	-0.231354	-106
0.333514	-0.0887788	-120
0.306115	-0.0563723	-118
0.241252	-0.0682735	-116
0.219977	-0.0565354	-80
0.194017	-0.0336774	-98
0.233023	-0.0506964	-102
0.198344	-0.0467551	-106
0.119486	-0.137354	-112
0.0887101	-0.0174226	-82
0.0750683	0.19779	-799.287
0.115112	0.168154	-798.65
0.1355	0.145326	-798.33
0.178426	0.134495	-797.636
0.147367	0.165916	-798.125
0.16334	0.14973	-797.874
0.152224	0.115003	-798.075
0.226432	0.0944114	-796.876
0.237922	0.0782743	-796.697
0.260316	0.0761447	-796.333
0.224196	0.138703	-796.887
0.201309	0.00521095	-797.336
0.185337	0.10899	-797.538
0.0862348	0.104804	-717.244
0.108013	0.122338	-715.037
0.12904	0.110283	-720.25
0.143519	0.125424	-717.625
0.174129	0.121668	-720.269
0.23348	0.0871034	-727.154
0.212026	0.158767	-720.852
0.0954676	0.224893	-707.443
0.148639	0.0452959	-723.191
0.255527	0.18504	-722.572
0.247482	0.223725	-719.448
0.291168	0.229161	-722.525
0.301483	0.0949122	-734.773
0.307837	-0.303613	-753.785
0.250617	-0.346597	-751.445
0.226832	-0.300934	-747.295
0.208093	-0.27456	-750.077
0.17252	-0.347829	-753.735
0.284499	-0.0227883	-737.911
-0.113616	-0.267949	-635.141
-0.04233	-0.131971	-637.369
-0.101663	-0.156396	-632.474
0.112612	0.00535979	-642.626
0.0923417	0.0768018	-635.066
0.111062	0.116639	-641.03
0.0487616	0.156038	-633.194
0.0591509	0.0171753	-636.736
0.155341	0.0492396	-645.31
0.19779	0.00541657	-654.078
0.233603	-0.153298	-662.373
0.33746	0.0473315	-663.919
0.308579	0.0976466	-659.07
0.272223	0.110559	-652.095
0.305337	0.160553	-661.924
0.37479	0.222133	-663.871
0.246364	0.208769	-651.306
0.260844	0.31949	-645.794
0.282227	-0.0537524	-658.866
0.399214	-0.252794	-679.329
0.295876	-0.350292	-677.207
-0.142539	-0.220374	-551.044
-0.0866971	-0.193231	-551.223
-0.00355194	-0.0978579	-551.548
-0.0186145	-0.0543523	-546.705
-0.0742824	-0.0303452	-546.581
0.0743813	0.114607	-547.144
0.0905472	0.131394	-552.056
0.101575	0.191248	-552.158
0.089116	0.253121	-542.502
0.073608	0.239837	-552.146
0.0602088	0.0767074	-551.911
0.0608674	0.0465734	-556.726
0.105653	0.018941	-551.956
0.20115	0.102259	-547.452
0.212228	0.131047	-547.516
0.253223	0.122007	-547.61
0.274332	0.118824	-547.66
0.269685	0.156074	-547.694
0.303717	0.152192	-552.626
0.239912	0.202406	-542.825
0.197777	0.213497	-542.731
0.179283	0.265922	-542.748
0.173022	0.209607	-547.513
0.175207	0.302079	-547.632
0.270756	0.285988	-552.706
0.189206	-0.126473	-552.049
0.175996	-0.26137	-551.912
0.210344	-0.292304	-547.125
-0.14759	-0.172001	-467.471
-0.121847	-0.147193	-467.093
-0.107268	-0.217457	-462.012
-0.0821988	-0.0817584	-461.666
0.00152707	-0.0642906	-465.278
0.00197298	-0.125854	-470.111
-0.0247761	0.0344547	-470.537
0.0759526	0.0664857	-464.198
0.200598	0.0106313	-457.485
0.219374	0.0333425	-457.211
0.273675	0.0601105	-456.411
0.305501	0.0834127	-460.793
0.308105	0.095781	-455.907
0.313885	0.118103	-455.826
0.267531	0.126943	-456.516
0.264153	0.17145	-461.426
0.28934	0.191697	-456.207
0.290305	0.228174	-456.2
0.283866	0.311158	-456.314
0.256681	0.334275	-456.722
0.213403	0.270741	-457.351
0.209408	0.310146	-457.419
0.0853222	0.296292	-459.258
0.0747337	0.249517	-459.405
0.0993943	0.185047	-459.025
0.150164	0.205084	-463.126
0.110837	0.141952	-458.846
0.125027	0.118446	-458.63
0.133911	0.0664919	-463.337
0.199396	0.112441	-457.525
0.228537	0.164384	-457.103
0.0258051	-0.0289516	-460.073
0.240238	-0.324714	-456.84
0.297773	-0.111647	-401.662
0.331901	-0.0376697	-400.589
0.148449	-0.158133	-404.56
-0.172876	-0.240231	-405.855
-0.0614424	-0.0959173	-407.827
-0.156572	0.129761	-402.709
0.0736114	0.239741	-398.005
0.0790577	0.109928	-398.984
0.100907	0.0616752	-399.003
0.0388854	0.0129178	-405.335
0.0127268	-0.037283	-401.288
0.104	-0.0691818	-404.758
0.198308	-0.0222633	-397.963
0.220197	0.0176375	-397.292
0.159428	0.0424567	-398.144
0.123445	0.00202737	-403.955
0.240323	-0.0852731	-402.49
0.272301	-0.0140595	-401.473
0.274484	0.118372	-395.515
0.225184	0.0974276	-401.396
0.377713	0.182027	-393.193
0.290422	0.193565	-394.616
0.265262	0.245278	-394.626
0.228859	0.194954	-400.525
0.223363	0.285332	-395.023
0.144678	0.305529	-396.225
0.255404	0.206228	-395.12
0.20424	0.0305996	-402.313
0.221534	0.127824	-396.358
0.177749	-0.0915014	-403.619
0.195043	-0.24356	-409.154
0.329218	-0.318038	-397.601
-0.0923252	-0.0574747	-308.995
-0.12444	-0.156596	-305.505
0.105359	-0.0270743	-322.056
0.134069	-0.0233126	-323.286
0.0541204	0.0320581	-313.132
0.0696421	0.0492034	-313.302
0.105878	0.0910678	-308.788
0.0852585	0.133005	-311.353
0.167529	0.0560321	-317.602
0.1235	0.0582547	-320.352
0.221454	0.0720517	-319.58
0.234226	0.068203	-315.439
0.308335	0.107311	-317.614
0.268516	0.00949769	-323.745
0.268816	-0.0174094	-324.502
0.231627	0.120227	-313.662
0.2185	0.141047	-312.393
0.297763	0.296078	-311.112
0.254286	-0.184936	-328.073
-0.137906	-0.22223	-209.376
0.00564972	-0.137452	-224.644
-0.122647	0.18882	-221.333
0.062032	0.257916	-239.469
0.075917	0.255648	-240.677
0.100216	0.253373	-242.836
0.129679	0.187176	-243.778
0.068887	0.132333	-236.776
0.060071	0.0814011	-240.244
0.10013	-0.0146176	-230.211
0.165388	-0.0574096	-240.899
0.189061	0.0271535	-250.591
0.199054	0.106659	-247.986
0.209019	0.147814	-244.365
0.192249	0.161363	-243.192
0.213033	0.238992	-252.759
0.241908	0.161516	-253.349
0.279596	0.128957	-250.313
0.290006	0.122933	-251.104
0.277261	0.0996322	-249.324
0.335062	0.159184	-261.795
0.324751	0.164262	-255.369
0.151964	-0.266516	-235.322
0.209793	-0.32196	-239.449
0.238119	-0.367825	-241.082
0.432622	-0.199969	-262.338
0.388493	-0.298029	-261.886
0.232701	0.0891417	-244.978
0.259972	0.341971	-259.767
0.0554909	0.00751888	-232.255
-0.110689	0.0240612	-165.654
-0.110076	-0.0702262	-171.651
-0.108823	-0.261582	-178.021
-0.0144369	-0.0108159	-165.814
0.110688	0.0955387	-157.725
0.139437	0.134927	-150.175
0.156355	0.0789591	-155.011
0.199758	0.0905633	-146.694
0.263068	0.0330358	-148.703
0.272417	0.0429095	-148.087
0.304861	-0.116524	-146.739
0.434544	-0.269265	-133.776
0.330862	-0.327904	-151.556
0.212827	-0.306561	-153.074
0.216894	-0.244407	-152.592
0.267593	-0.358617	-149.924
0.253811	0.213538	-148.441
0.264666	0.171378	-142.358
0.250251	0.235304	-148.559
0.132077	0.232735	-150.177
0.115479	0.249937	-156.725
0.122436	0.271538	-156.201
0.0860485	0.201374	-164.358
0.263194	0.315019	-141.79
0.43508	0.0353556	-138.185
0.330404	0.107132	-144.25
0.146721	0.0281755	-155.833
0.0785556	0.0106301	-154.464
0.0413855	0.0941175	-161.965
0.260641	-0.170044	-144.028
0.256068	-0.0991376	-68.2426
0.169059	-0.307346	-87.76
0.290638	0.0444964	-65.1007
0.310348	0.0570095	-63.4269
0.219974	0.115703	-59.0162
0.234593	0.13279	-57.3397
0.255962	0.138921	-61.5562
0.211871	0.18881	-55.3434
0.198385	0.151469	-63.7092
0.255241	0.213103	-51.8409
0.285657	0.211617	-56.0338
0.268079	0.243804	-55.1107
0.249485	0.235924	-56.4711
0.283821	0.281166	-46.6319
0.115674	0.294204	-54.2353
0.125408	0.242683	-56.6243
0.118666	0.214651	-64.1373
0.119044	0.079842	-71.6316
0.0913097	0.112703	-71.1741
0.04301	0.237042	-66.6374
0.253275	-0.0593466	-1.16655
0.360104	-0.135707	-4.44165
0.320255	-0.342693	-18.1055
0.299326	-0.321237	-16.0499
0.233841	-0.285556	-11.136
0.277395	-0.173729	-2.24516
0.189572	0.127989	-652
0.235153	0.197506	-662
0.219326	0.18951	-670
0.109059	0.146191	-674
0.239121	0.182814	-676
0.259986	0.128505	-648
0.222778	0.107444	-652
0.203141	0.166802	-650
0.144567	0.129259	-652
0.154961	0.077399	-652
0.284043	-0.011	-662
-0.0117689	0.0841071	-666
0.310116	0.130403	-674
0.230302	0.028675	-674
0.327353	-0.125322	-680
0.10381	0.0576147	-680
0.227185	-0.167365	-684
-0.174113	-0.157313	-684
-0.210973	-0.260802	-650
0.136842	0.147853	-658
0.0462667	-0.0229188	-662
-0.237204	-0.0366882	-668
-0.201883	-0.0825619	-682
0.291436	0.124023	-684
0.225261	0.141785	-686
0.259096	0.204869	-660
0.159645	-0.095601	-668
0.275452	-0.0742683	-178
0.197523	-0.00146341	-184
-0.11492	-0.162064	-194
0.240774	0.149625	-198
0.171905	0.0379646	-206
0.23935	0.154283	-210
0.246679	0.0712044	-210
0.210842	-0.120088	-172
0.258361	0.148886	-178
0.0525259	0.0649104	-182
0.127123	0.193794	-190
0.339591	0.0970252	-196
0.257813	0.0674693	-200
0.141863	0.108697	-208
0.271821	0.00890198	-180
0.233111	0.0985062	-190
0.126194	0.320439	-204
0.237938	0.178936	-208
0.160692	0.157066	-212
0.173943	0.262929	-208
0.0614308	0.190216	-206
0.314004	-0.0236879	-210
0.233449	-0.143609	-206
-0.158223	-0.223543	-188
-0.184021	-0.148714	-184
-0.133141	-0.215934	-190
-0.109049	-0.144125	-192
-0.0839092	-0.0715816	-194
0.0689183	0.102978	-196
0.108263	0.104951	-196
0.265256	0.096162	-206
0.237721	0.188663	-176
0.296106	0.0489836	-176
0.228318	0.165922	-184
0.170772	0.184142	-188
0.224548	0.067752	-190
0.174711	0.142708	-194
0.089747	0.172113	-198
0.193593	0.213884	-196
0.189643	0.154298	-200
0.26553	0.0695234	-206
0.241596	0.0192324	-202
0.257396	-0.117469	-204
0.228912	-0.201105	-212
0.194223	-0.0068663	-194
0.181452	-0.129734	-192
0.262285	-0.0317756	-194
0.112528	-0.0715479	-194
0.094775	0.0459637	-198
0.253155	-0.326318	-204
-0.0417477	-0.109622	-210
-0.124842	-0.0908079	-212
-0.0631707	-0.089389	-208
0.11534	-0.0568388	-716
0.244914	-0.091251	-680
0.156671	-0.00593621	-686
0.194651	0.0210032	-690
0.202429	0.0629772	-690
0.216155	0.0584563	-698
0.252014	0.0785536	-696
0.120866	-0.0316705	-700
0.323836	-0.088574	-708
0.260536	-0.111656	-712
0.270901	-0.265156	-714
-0.167371	0.119656	-716
-0.0403812	-0.107327	-710
-0.192413	-0.119128	-666
-0.155754	-0.0430771	-672
-0.0792875	-0.0908242	-674
-0.148867	-0.116586	-674
0.00580859	-0.0566321	-670
-0.14972	-0.206582	-672
-0.0998938	-0.176995	-670
-0.0776088	-0.156756	-672
-0.106233	-0.117284	-676
-0.149007	-0.133723	-680
-0.040333	-0.116497	-680
0.319848	0.155838	-676
0.23354	0.0455217	-676
0.179787	0.133828	-672
0.242931	0.142397	-668
0.121691	0.155903	-668
0.0591693	0.232027	-674
0.118607	0.120176	-678
0.139873	0.0798031	-682
0.130685	0.0765464	-682
0.132605	0.137101	-684
0.11393	0.210773	-688
0.166567	0.20114	-688
0.159412	0.112704	-690
0.273047	0.079259	-690
0.272135	0.130904	-694
0.264218	0.128947	-696
0.0830044	0.174891	-696
0.195695	0.155164	-694
0.20027	0.0896547	-698
0.156934	0.071381	-698
0.147773	0.123124	-698
0.144088	0.144208	-700
0.109344	0.21407	-698
0.0945786	0.226342	-694
0.0877939	0.212844	-696
0.0973462	0.137402	-700
0.124378	0.12997	-694
0.111254	0.195341	-692
0.12729	0.184369	-690
0.129548	0.179512	-690
0.0610411	0.119234	-686
0.21776	0.20888	-690
0.216806	0.246889	-688
0.267265	0.230321	-674
0.282368	0.129499	-680
0.291052	0.102259	-684
0.231314	0.12245	-686
0.235755	0.135534	-684
0.249067	0.118633	-684
0.251486	0.187683	-682
0.303103	0.146279	-686
0.368966	0.194911	-686
0.420825	0.232685	-686
0.320915	0.161028	-684
0.20049	0.118763	-680
0.245168	0.161823	-690
0.31449	0.132188	-696
0.326423	0.0135144	-694
0.270885	0.065103	-694
0.227227	0.0769524	-702
0.248884	0.264018	-702
0.121557	0.274706	-702
0.166325	0.230467	-700
0.189989	0.134713	-694
0.236479	0.103697	-668
0.22617	0.127908	-674
0.227297	0.111445	-680
0.144437	0.117861	-676
0.198221	0.101626	-702
0.270048	0.0598077	-668
0.165617	0.135582	-672
0.191329	0.176572	-676
0.261955	0.00823533	-678
0.220844	0.0958921	-680
0.152976	0.244729	-680
0.260711	0.119217	-684
0.266611	0.171066	-684
0.0702555	0.16041	-692
0.188701	0.180844	-690
0.196237	0.160224	-700
0.264106	0.16011	-706
0.0573618	0.0274836	-696
0.23274	-0.146157	-696
0.15858	0.0234065	-678
0.214714	-0.0308784	-678
0.16544	0.0434832	-694
0.160206	-0.0882821	-682
0.0801993	0.0189802	-682
0.0396143	0.00877948	-708
0.144051	-0.0629995	-706
0.170203	0.0292054	-698
0.192756	-0.18484	-208
0.254977	-0.279587	-212
0.10389	0.0762459	-220
0.255449	-0.19634	-236
0.00951472	0.0447745	-238
0.269694	-0.0883715	-246
0.393295	-0.120728	-240
0.373804	-0.135266	-246
0.242979	-0.304918	-246
0.303323	-0.223637	-250
0.360245	-0.074654	-248
-0.206011	-0.0592585	-252
-0.153749	-0.0372861	-260
-0.190805	-0.168644	-228
-0.134166	-0.17169	-238
-0.208907	0.00884877	-244
-0.0945282	-0.128449	-256
-0.000717353	0.0665961	-260
0.0265682	0.0152813	-258
0.0278458	-0.00247281	-264
0.0167138	-0.0272332	-252
0.0871243	-0.00216573	-232
-0.102393	-0.118881	-234
0.077516	0.0624747	-234
0.0920463	0.238286	-238
0.24767	0.22842	-238
0.261792	0.223797	-238
0.288554	0.253641	-236
0.17383	0.213421	-240
0.239816	0.255944	-238
0.115619	0.216694	-242
0.0998272	0.215765	-240
0.168395	0.168199	-244
0.185391	0.150793	-240
0.233653	0.156724	-238
0.248822	0.17287	-240
0.313357	0.135988	-242
0.29346	0.135188	-246
0.243418	0.0526967	-244
0.271552	0.0216573	-244
0.221034	0.0833481	-248
0.2102	0.0727377	-246
0.199937	0.0332536	-244
0.162781	0.0615293	-246
0.208865	0.109636	-248
0.220123	0.121143	-250
0.18813	0.128214	-250
0.226505	-0.0179319	-254
0.131365	0.0679537	-252
0.127202	0.159334	-248
0.170149	0.138938	-250
0.146665	0.116909	-254
0.0912399	0.131705	-256
0.0736779	0.129216	-244
0.071175	0.145952	-242
0.107535	0.0686487	-244
0.184066	0.0272736	-242
0.147775	0.0650041	-242
0.12915	0.0530765	-252
0.0986753	0.0716952	-254
0.109504	0.0890615	-254
0.263048	-0.00475975	-256
0.209734	0.0581514	-258
0.211546	-0.0119277	-256
0.244167	0.159642	-254
0.224893	0.151431	-254
0.257037	0.134146	-258
0.309148	0.0217623	-258
0.252398	-0.0547088	-258
0.0828673	0.130267	-260
0.0854278	0.150235	-256
0.0629228	0.111187	-242
0.128856	0.134429	-246
0.157441	0.132214	-246
0.208336	0.143035	-256
0.230412	0.128667	-256
0.29103	0.0350234	-244
0.17128	0.115042	-242
0.204419	-0.0139641	-246
0.233862	-0.0498117	-250
0.235972	-0.0264493	-250
0.231323	-0.00514764	-252
0.308624	-0.115478	-256
0.257681	-0.121329	-242
-0.171349	-0.106067	-798.61
-0.0895528	0.136895	-790.764
0.00398202	-0.0816164	-791.183
-0.0630992	-0.103118	-796.854
0.194007	0.173255	-793.392
0.207495	0.0648283	-798.61
0.118962	0.118282	-796.236
0.179249	0.0272688	-795.894
0.168198	0.0044773	-790.724
0.209366	-0.312111	-792.546
0.276327	-0.0137432	-792.226
0.281293	0.142139	-789.773
0.306227	0.0711889	-789.927
0.279111	-0.265989	-798.61
0.2704	-0.374392	-791.661
0.336912	-0.194822	-793.318
0.317313	-0.18168	-790.995
-0.23656	-0.0537137	-786.751
-0.160516	-0.240305	-786.755
0.216803	0.209127	-783.982
0.388199	-0.268545	-787.983
-0.0880114	-0.00213649	-718.61
-0.0511533	-0.00921901	-714.399
-0.121157	-0.170816	-713.65
-0.0915394	-0.163451	-712.484
0.0617063	0.213889	-712.119
0.140297	0.17885	-712.59
0.172114	0.134373	-711.756
0.218344	0.150527	-714.012
0.13598	0.0877614	-718.61
0.175494	-0.00514903	-718.61
0.241364	0.263654	-713.312
0.340133	0.0185435	-718.61
0.248327	-0.0677788	-716.404
0.256979	-0.0656535	-712.767
0.247523	-0.00548548	-710.238
0.304777	0.114463	-710.592
0.367565	-0.351643	-712.744
0.215401	-0.311705	-709.753
0.296856	-0.154532	-709.252
0.417289	-0.314701	-716.091
-0.0377831	-0.0564238	-707.355
0.170724	0.214629	-708.195
0.0756724	0.106179	-701.93
0.264919	0.165782	-703.347
0.332425	0.124637	-701.93
0.299535	-0.0221597	-707.217
0.254978	-0.329322	-703.826
0.348475	-0.2516	-704.607
0.372164	-0.250835	-701.93
-0.229229	0.169271	-631.761
-0.028894	0.00598674	-629.351
-0.129506	-0.174519	-635.103
0.0036518	-0.0921294	-632.288
0.0592291	0.313594	-629.157
0.0613859	0.19063	-629.862
0.099797	0.160859	-638.61
0.129491	0.161511	-638.61
0.136169	0.167778	-638.61
0.143752	0.10563	-638.61
0.151515	0.0310981	-638.61
0.122797	0.0893127	-634.671
0.146238	0.0936687	-634.171
0.188574	0.102681	-631.796
0.192547	0.0404789	-634.176
0.106243	0.108383	-631.034
0.129582	0.094618	-631.165
0.235627	0.254	-631.038
0.249837	0.063709	-634.279
0.206585	-0.282827	-630.012
0.267815	-0.0582013	-630.196
0.00342784	-0.062969	-627.017
0.0836372	0.231276	-627.539
0.0768343	0.112108	-627.994
0.244513	0.214355	-627.036
0.263399	0.274201	-621.93
0.273685	-0.0148282	-628.663
0.362903	0.10812	-627.1
0.20063	0.138282	-623.95
0.315134	-0.315889	-627.818
-0.0871529	-0.166347	-549.829
0.037963	0.0174228	-558.61
0.113893	0.0725789	-558.61
0.117789	0.110469	-558.61
0.146435	0.069181	-558.61
0.110263	-0.0881893	-550.786
0.219806	0.00515519	-558.61
0.26567	0.0375864	-558.61
0.229145	-0.0882378	-553.389
0.256437	0.0138236	-553.411
0.295579	-0.112614	-558.61
0.237162	-0.333598	-551.116
0.33499	-0.224864	-549.52
0.347917	-0.277518	-550.436
-0.166057	-0.159159	-472.967
0.0361853	0.0703489	-478.61
0.0529417	0.0302552	-478.61
0.0676488	0.0244722	-478.61
0.0936606	0.0724321	-478.61
-0.0629568	-0.0560104	-472.861
0.0135886	0.0437405	-470.531
-0.12595	-0.160435	-470.055
0.175822	0.193308	-478.61
0.185823	0.165209	-478.61
0.189924	0.151109	-478.61
0.194808	0.200817	-475.829
0.182369	0.136869	-473.61
0.139546	0.0973605	-478.61
0.166757	0.0075171	-478.61
0.171391	0.0625207	-478.61
0.198591	0.116728	-478.61
0.102622	0.0557242	-475.776
0.242156	0.0635086	-471.311
0.421516	-0.338045	-470.252
0.33102	-0.390347	-466.973
0.323393	-0.282349	-463.648
-0.0641922	0.0190686	-398.61
-0.0084219	-0.0475563	-398.61
-0.160848	0.00944895	-392.06
0.0369471	0.0838073	-393.74
0.198399	0.189741	-398.61
0.21291	0.251996	-398.61
0.228679	0.23953	-398.61
0.202231	0.201008	-395.535
0.100878	0.126364	-398.61
0.112383	0.0772415	-398.61
0.141831	0.0890352	-398.61
0.148829	0.00892979	-398.61
0.235576	0.106295	-392.3
0.196167	-0.270906	-395.707
0.260913	-0.0618332	-398.61
0.290007	-0.148684	-398.61
0.238005	-0.310199	-386.454
-0.212524	-0.248023	-313.312
0.0631197	0.232798	-318.61
-0.127431	-0.14524	-314.024
0.125949	0.146219	-318.61
0.139078	0.167471	-318.61
0.145196	0.138273	-318.61
0.189461	0.261633	-318.61
0.23284	0.243535	-318.61
0.126419	0.197876	-316.575
0.197982	0.170788	-315.337
0.079444	0.138603	-313.359
0.0691593	0.0788164	-318.61
0.0747222	0.115699	-318.61
0.0996455	0.0515079	-318.61
0.149815	0.0743888	-318.61
0.230676	0.0490912	-318.61
0.105173	0.0848533	-315.833
0.137629	0.029482	-310.336
0.231389	-0.202485	-315.341
0.18988	-0.315875	-312.52
0.195413	-0.306602	-310.858
0.253387	0.0834862	-314.849
-0.101382	-0.102431	-307.22
-0.244643	-0.281956	-229.397
-0.0749523	-0.169515	-233.101
0.062486	0.146946	-233.045
0.094356	0.152298	-232.837
0.140361	0.184086	-233.435
0.162086	0.144292	-233.481
0.120122	0.145202	-228.966
0.0225531	0.0343113	-238.61
0.192626	-0.0169577	-238.61
0.040671	0.0401412	-232.858
0.0710575	0.0977073	-233.932
0.0984448	0.0793725	-234.337
0.104463	0.108324	-233.313
0.187922	0.0936438	-231.134
0.305672	-0.132776	-232.749
0.224194	0.0754339	-230.523
0.293375	-0.177177	-235.125
0.198325	-0.325049	-233.222
0.274264	-0.297423	-232.522
0.309421	-0.268486	-231.163
-0.0994341	-0.212696	-227.301
0.160478	0.128186	-226.383
0.201936	0.176037	-226.182
0.22052	0.204556	-228.839
0.0746578	0.197152	-225.902
0.0473043	0.121763	-149.822
0.173127	0.123815	-153.142
0.199557	0.16444	-151.997
0.0857965	0.145589	-150.333
0.184966	0.133421	-150.637
0.20591	0.196528	-150.71
0.116521	0.0708017	-151.983
0.172651	0.0640242	-153.689
0.0871034	0.0517949	-150.832
0.116836	0.0923945	-150.207
0.11501	0.0080879	-151.413
0.17109	-0.0238044	-150.386
0.185129	-0.287414	-152.54
0.208565	-0.284727	-152.446
-0.22556	-0.162164	-145.394
-0.00599936	-0.0903711	-143.819
0.0846808	0.186842	-146.75
0.196999	0.188288	-146.782
0.205605	0.247162	-148.651
0.107011	0.215625	-144.069
0.0979838	0.115855	-148.053
0.213009	0.0298727	-148.654
0.188173	-0.00762364	-145.398
0.224408	-0.320099	-147.632
0.240352	-0.341739	-148.541
0.294094	-0.330017	-147.041
0.231557	-0.29933	-144.474
-0.0916974	-0.0512676	-69.7341
0.106662	0.218111	-72.3766
0.123967	0.127963	-72.9246
0.166647	0.176153	-73.9828
0.141657	0.122707	-69.5585
0.206827	0.115966	-70.9846
0.250873	0.180692	-71.4352
0.255975	0.142531	-71.4867
0.267409	0.228055	-71.0132
0.102906	0.108959	-74.1258
0.273844	-0.148125	-72.0083
0.228905	-0.0713671	-70.6604
0.227232	-0.153489	-76.132
0.288446	0.0389383	-70.1418
0.298756	-0.10686	-69.3147
0.409078	-0.312337	-73.3254
0.370437	-0.284927	-69.822
0.149644	0.196344	-68.6162
0.221051	0.0237314	-67.3256
0.252279	-0.0282061	-61.93
0.314723	0.0485677	-61.93
0.133949	0.150124	-793.05
0.161007	0.150728	-793.05
0.173276	0.104115	-793.05
0.173197	0.0873609	-790.27
0.165202	0.0561318	-793.05
0.128549	0.0439151	-795.83
0.277268	0.0137703	-790.27
-0.0879789	-0.00782144	-790.27
0.252721	-0.145077	-790.27
0.188803	-0.313841	-793.05
0.21171	-0.342732	-795.83
0.326697	-0.33282	-790.27
-0.15559	-0.189535	-793.05
0.247946	-0.157733	-707.49
0.222667	-0.148861	-707.49
0.00865293	-0.0815705	-710.27
-0.176528	-0.230239	-707.49
-0.153776	-0.17026	-707.49
0.322764	0.0512347	-713.981
0.297809	0.0390492	-717.058
0.17341	0.0376609	-713.05
0.1577	0.0731931	-710.27
0.0970565	0.185366	-713.05
0.255708	0.225249	-712.973
0.119942	0.266118	-711.294
0.0100039	-0.0273991	-710.27
-0.0513294	0.00768255	-710.27
0.200682	-0.344044	-708.545
0.242215	-0.336439	-707.808
0.290004	-0.260262	-706.978
0.0919713	0.0950803	-715.83
0.0915102	0.0870907	-715.83
0.0956271	0.144311	-713.05
0.222131	0.0878972	-715.697
0.243349	0.185289	-712.271
0.0777541	0.165205	-638.61
0.0978984	0.0696016	-638.208
0.109709	0.0520948	-637.84
0.141481	0.0559109	-638.008
0.169191	-0.0158973	-637.15
0.221951	0.0209549	-637.557
0.220664	0.0353454	-637.032
0.280405	0.0545821	-637.002
0.210451	0.21425	-638.61
0.148272	0.232111	-638.61
0.179789	0.239813	-638.61
0.169311	0.137274	-638.61
0.155459	0.105137	-636.349
0.37754	-0.0685806	-634.162
0.221175	-0.0370219	-637.406
0.216077	-0.0282748	-637.042
0.285919	-0.0755259	-635.565
0.234088	-0.16555	-637.678
0.217863	-0.20035	-637.458
0.234155	-0.333663	-637.642
0.349989	-0.306728	-635.956
0.295256	-0.256284	-638.307
0.25789	-0.184752	-638.482
0.210256	0.155141	-638.61
0.149249	0.131826	-638.61
0.180565	0.121498	-547.477
0.187295	0.101172	-547.476
0.204169	0.0994261	-550.255
0.206673	0.0706249	-550.255
0.239642	0.0146202	-547.472
0.218606	-0.000566061	-553.034
0.196717	-0.00870132	-547.476
0.269605	0.0387663	-550.25
0.142089	0.0610905	-553.04
0.0711922	0.0718623	-553.045
-0.00558349	0.0774668	-550.27
-0.126055	-0.169625	-550.279
0.21001	-0.117482	-550.255
0.217884	-0.281656	-547.474
0.214877	-0.307528	-550.254
0.276558	-0.294115	-547.47
0.268142	-0.348394	-550.251
0.273881	-0.252744	-547.47
0.286228	-0.0622894	-550.249
0.296858	-0.0534115	-550.248
0.0453128	-0.0866949	-553.047
0.217241	-0.331326	-547.474
0.233758	-0.365408	-550.253
0.289968	-0.177741	-550.249
0.252914	-0.133017	-550.252
0.210592	0.210702	-470.27
0.258585	0.222761	-470.27
0.22939	0.23578	-470.27
0.220358	0.12126	-473.05
0.223281	0.0697822	-467.49
0.241101	0.071136	-470.27
0.170503	0.0994667	-473.05
0.174306	0.0739775	-473.05
0.160577	0.0264271	-473.05
0.112586	0.0482715	-473.05
0.0786403	0.0609116	-473.05
0.081309	0.117193	-467.49
0.0897444	0.153785	-467.49
0.132627	0.134035	-467.49
0.00227504	0.0485997	-470.27
-0.104406	-0.206663	-470.27
0.126301	-0.0556361	-473.05
0.176624	0.125755	-467.49
0.21901	-0.205296	-470.27
0.246471	-0.162923	-467.49
0.250596	-0.342371	-470.27
0.221127	-0.148943	-473.05
0.209504	0.00734102	-473.05
0.235151	-0.147636	-470.27
0.0766936	0.0440058	-473.05
0.185258	0.166583	-390.27
0.184024	0.0973189	-387.49
0.146373	0.0820909	-390.27
0.136637	0.0607159	-390.27
0.112237	0.11812	-395.83
0.0871721	0.106658	-387.49
0.0890202	0.0930668	-393.05
0.0626282	0.0230609	-390.27
0.0567763	0.0286676	-395.83
-0.102687	-0.157182	-390.27
-0.0885298	-0.196585	-387.49
-0.140786	-0.21143	-384.71
-0.0560493	-0.156177	-384.71
-0.0480808	-0.119733	-390.27
0.115824	-0.167312	-393.05
0.182575	-0.213485	-384.71
0.198306	-0.229704	-384.71
0.206888	-0.284504	-390.27
0.201843	-0.31128	-390.27
0.27741	-0.384442	-384.71
0.251635	-0.0569099	-393.05
0.178198	-0.00322376	-390.27
0.138566	-0.0317496	-384.71
0.248866	0.0334088	-387.49
0.309717	0.0348391	-387.49
0.277034	0.0707481	-390.27
0.317285	0.0744521	-390.27
0.248998	0.105431	-390.27
0.22627	0.106325	-393.05
0.216332	0.13966	-387.49
0.0179472	-0.0075441	-395.83
0.0103586	-0.0133498	-398.61
0.0962907	0.0292311	-395.83
0.206738	-0.285892	-310.27
0.265716	-0.333047	-304.71
0.254544	-0.36761	-301.93
0.341004	-0.357285	-304.71
0.324127	-0.312974	-310.27
0.316009	-0.0647451	-301.93
0.321658	-0.0261554	-310.27
0.325669	-0.0108168	-301.93
0.19451	-0.0634313	-313.05
0.152403	-0.157759	-304.71
0.152266	0.0191472	-310.27
0.131959	0.0552681	-307.49
0.14035	0.120954	-315.83
0.13452	0.0943132	-304.71
0.149077	0.0801729	-304.71
0.195343	0.119259	-310.27
0.211824	0.189856	-310.27
0.219362	0.188632	-310.27
0.260362	0.10102	-310.27
0.103379	0.166693	-307.49
0.0759995	0.165163	-313.05
0.0553576	0.157268	-313.05
0.0305513	0.044444	-310.27
0.0501997	0.0230057	-313.05
0.0168385	-0.00737514	-315.83
0.00521727	-0.0891602	-307.49
-0.118505	0.0369241	-313.05
0.372123	-0.308341	-313.05
0.0748485	0.0379326	-301.93
0.166874	0.100988	-307.49
0.242125	0.132356	-235.83
0.233113	0.0497835	-235.83
0.199698	0.115117	-238.61
0.193466	0.133834	-238.61
0.136655	0.17991	-235.83
0.106128	0.16345	-233.05
0.0745427	0.152996	-230.27
0.140476	0.0633524	-235.83
0.178006	0.185339	-235.83
0.216622	0.133411	-238.61
0.206014	0.101216	-235.83
0.0633171	-0.0015129	-233.05
-0.0484627	-0.0616139	-224.71
-0.0755716	-0.16069	-238.61
0.231581	-0.140494	-235.83
0.284073	-0.168652	-235.83
0.269021	-0.3222	-235.83
0.215709	-0.14489	-238.61
0.039313	-0.0401533	-233.05
0.0461834	0.0130093	-235.83
-0.0340859	-0.0880336	-144.71
-0.0399128	-0.135511	-150.27
-0.00460128	-0.123401	-155.83
0.00461533	-0.0965015	-155.83
-0.00478344	-0.0663435	-155.83
-0.119647	-0.203912	-155.83
0.0627489	-0.00121919	-158.61
0.0324838	0.0440277	-155.83
0.000761862	0.0467727	-150.27
0.0973706	0.0829369	-158.61
0.0817489	0.10765	-153.05
0.09849	0.11235	-155.83
0.0802562	0.13811	-150.27
0.0529434	0.142767	-153.05
0.168313	0.0964493	-158.61
0.181371	0.131693	-155.83
0.213262	0.180973	-153.05
0.236446	0.170668	-144.71
0.200786	0.0811194	-155.83
0.203254	0.0604435	-150.27
0.22026	0.0526499	-147.49
0.220195	0.0370604	-155.83
0.185991	0.0326275	-153.05
0.197087	0.00759827	-155.83
0.225368	-0.22111	-153.05
0.236907	-0.227653	-147.49
0.188592	-0.200238	-155.83
0.218374	-0.11577	-153.05
0.209593	-0.180991	-155.83
0.046331	-0.0152332	-147.49
0.289995	-0.160556	-70.27
0.301463	-0.274769	-73.05
0.22514	-0.298699	-73.05
0.232808	-0.330659	-67.49
0.220265	-0.151389	-67.49
0.195227	-0.0818833	-73.05
0.234494	-0.0275004	-70.27
0.229986	0.123059	-73.05
0.222127	0.129471	-64.71
0.157617	0.184257	-73.05
0.119908	0.134943	-70.27
0.125726	0.121061	-73.05
0.146687	0.14394	-64.71
0.0674179	0.118603	-67.49
0.0765041	0.0930458	-73.05
0.0925183	0.0966897	-70.27
0.0849356	-0.0148029	-73.05
0.109434	-0.0108992	-73.05
0.0573345	-0.072734	-78.61
-0.166318	-0.0510349	-78.61
-0.102017	-0.100979	-64.71
0.0986876	0.132917	-64.71
0.132092	0.146271	-64.71
0.125653	0.198278	-64.71
0.0660864	0.237922	-70.27
0.163004	0.0601027	-70.27
0.168241	-0.0812838	-75.83
0.0775457	-0.0436512	-73.05
0.0517418	0.221757	-64.71
0.280062	-0.140006	-792.521
0.268472	-0.213254	-791.088
0.237009	-0.253808	-790.767
0.216474	-0.269273	-793.265
0.256691	-0.170473	-788.409
0.259719	-0.100014	-798.38
0.21199	0.0712057	-798.38
0.208188	0.0928443	-798.38
0.203644	0.0962695	-798.38
0.187949	-0.0066031	-798.38
0.236466	-0.101116	-794.373
0.161455	0.0607282	-794.909
0.262741	0.068289	-790.778
0.187551	0.0950726	-791.412
0.16045	-0.0393053	-792.295
0.132714	0.0595377	-790.661
0.134074	-0.00317292	-792.884
0.192115	0.0979771	-790.182
0.164157	0.0260286	-789.264
0.133266	0.035046	-788.321
0.24609	0.190014	-792.524
0.236927	0.178354	-791.017
0.199971	0.146791	-790.455
0.184911	0.182402	-793.429
0.181854	0.141533	-792.434
0.122802	0.0977462	-792.867
0.0551286	-0.00688916	-788.23
0.111113	0.210866	-790.782
0.10617	0.175136	-789.784
0.104379	0.166413	-789.201
-0.143258	-0.299055	-794.949
-0.151083	-0.208904	-792.554
-0.171022	-0.322665	-788.531
-0.100254	-0.117867	-794.131
-0.124707	-0.139759	-794.752
-0.107545	-0.155637	-793.116
-0.104828	-0.0934535	-788.8
-0.17612	0.171209	-788.938
-0.196588	0.101617	-792.501
0.301158	-0.0102014	-784.622
0.225163	-0.352033	-785.539
0.139361	0.0446707	-786.67
0.247114	0.266664	-785.898
0.0953832	0.0165326	-785.463
-0.13117	-0.208967	-785.912
-0.0438313	-0.153952	-785.987
-0.054422	0.0180971	-786.552
0.256776	-0.314023	-718.38
0.232341	-0.218369	-712.291
0.322878	0.0346557	-718.38
0.317951	0.00438887	-718.38
0.294562	0.0385855	-718.38
0.290857	0.0204976	-718.38
0.280906	0.0738037	-718.38
0.276871	0.0529475	-718.38
0.26811	-0.0579971	-718.38
0.239077	0.0884892	-718.38
0.203546	0.0605582	-718.38
0.229588	-0.145019	-714.94
0.212562	-0.128782	-714.564
0.29732	0.169269	-718.38
0.28936	0.296337	-718.38
0.281083	0.307839	-718.38
0.23506	0.206333	-718.38
0.227903	0.172928	-718.38
0.223931	0.186868	-718.38
0.191741	0.244332	-718.38
0.180185	0.169894	-718.38
0.173817	0.157439	-713.604
0.244898	0.150389	-713.206
0.172459	0.0142572	-718.38
0.14977	0.0289874	-718.38
0.138697	0.0498791	-718.38
0.13718	0.0355436	-718.38
0.129883	0.0808698	-718.38
0.128308	0.0489109	-718.38
0.117548	0.0786914	-718.38
0.110917	0.0641067	-718.38
0.0943677	-0.0511506	-718.38
0.15568	0.00275356	-711.306
0.148523	0.121744	-718.38
0.12145	0.169909	-718.38
0.123683	0.0925532	-718.38
0.116292	0.118311	-718.38
0.0875561	0.152301	-718.38
0.0811102	0.190584	-718.38
0.0791877	0.108055	-718.38
0.128217	0.127091	-716.296
0.0745224	0.208775	-716.129
0.159356	0.193252	-712.26
-0.0376514	-0.065437	-718.38
-0.0540692	-0.11643	-718.38
-0.080401	0.000334356	-718.38
-0.0785717	-0.153882	-718.38
-0.0942626	-0.0829834	-718.38
-0.103047	-0.168072	-718.38
-0.117656	-0.190542	-718.38
-0.122751	-0.121422	-718.38
-0.0316731	0.0281706	-714.945
-0.0985731	-0.158926	-712.797
-0.132421	0.125407	-718.38
-0.149003	-0.141007	-718.38
-0.307346	-0.00881497	-718.38
-0.181686	-0.181036	-711.566
0.244062	-0.343284	-638.38
0.240395	-0.280282	-638.38
0.234117	-0.235055	-638.38
0.201382	0.0227173	-638.38
0.180833	0.0360323	-638.38
0.223862	-0.159582	-635.069
0.243091	-0.0636372	-631.389
0.143444	-0.00332328	-632.145
0.260551	0.197681	-638.38
0.229177	0.192379	-638.38
0.221576	0.145649	-638.38
0.215958	0.233311	-638.38
0.207788	0.192951	-638.38
0.204275	0.131604	-638.38
0.199996	0.269068	-638.38
0.197652	0.171115	-638.38
0.178798	0.12747	-638.38
0.166143	0.202662	-638.38
0.159714	0.181185	-638.38
0.148808	0.135157	-638.38
0.266636	0.0835051	-633.892
0.249955	0.298003	-636.141
0.252967	0.0905282	-634.27
0.206677	0.117658	-635.722
0.196787	0.0569353	-635.904
0.169094	0.153764	-634.596
0.167023	0.163389	-635.602
0.188693	0.144874	-632.337
0.164058	0.0648777	-631.376
0.145554	0.0662689	-631.805
0.136846	0.314884	-638.38
0.131047	-0.191271	-638.38
0.114163	0.027034	-638.38
0.11393	-0.0702037	-638.38
0.0148359	-0.0254997	-638.38
0.00758081	-0.0519032	-638.38
-0.0001194	-0.0548591	-638.38
0.106435	-0.0563372	-634.786
0.138601	0.170181	-638.38
0.126002	0.197636	-638.38
0.125819	0.0927896	-638.38
0.0963222	0.18163	-638.38
0.0839903	0.199632	-638.38
0.0356751	0.0488014	-638.38
0.087629	0.170791	-634.41
0.0875704	0.056726	-635.689
0.0578717	0.0491041	-635.687
0.112918	0.0642044	-631.293
0.0316819	0.156586	-630.113
-0.0954328	-0.249392	-638.38
-0.134384	-0.264255	-633.826
-0.0427361	-0.146172	-638.38
-0.0782012	-0.101113	-638.38
-0.0930399	-0.108902	-638.38
-0.103985	-0.14717	-638.38
-0.12152	-0.0798355	-638.38
-0.152195	-0.210794	-638.38
-0.155356	-0.158691	-638.38
-0.0516488	0.0157403	-633.193
-0.115868	-0.126665	-631.416
-0.0747576	0.0972237	-638.38
-0.0825538	0.0978983	-638.38
-0.096587	0.0938776	-638.38
-0.323391	-0.0184246	-638.38
-0.312968	0.147709	-638.38
-0.246348	0.135396	-629.963
0.357048	-0.285647	-558.38
0.35424	-0.16971	-558.38
0.311168	0.00987898	-558.38
0.248792	-0.20814	-558.38
0.28468	0.053978	-558.38
0.279642	0.0493031	-558.38
0.282033	-0.11224	-558.38
0.216338	-0.0533514	-558.38
0.212291	-0.00243668	-558.38
0.184532	-0.0560039	-558.38
0.167139	-0.0633538	-558.38
0.20542	-0.0903913	-551.018
0.180808	0.0333692	-552.248
0.167743	-0.0293171	-552.77
0.137657	-6.28322e-05	-551.463
0.286103	0.124798	-558.38
0.259271	0.275923	-558.38
0.231658	0.215905	-558.38
0.216912	0.217072	-558.38
0.173781	0.11731	-558.38
0.160653	0.180144	-558.38
0.138552	0.0596995	-558.38
0.132508	0.0667608	-558.38
0.151201	0.12338	-555.362
0.302761	0.0827399	-551.684
0.195328	0.148972	-552.766
0.180868	0.16369	-550.484
0.139454	0.290389	-550.528
0.131042	0.294515	-552.119
0.146402	0.270853	-548.919
0.130422	-0.0643337	-558.38
0.0661642	0.0257294	-558.38
0.0648462	-0.030355	-558.38
0.0563148	-0.016538	-558.38
0.0234344	-0.0109648	-558.38
0.0167483	0.00717983	-558.38
0.00998586	-0.0188834	-558.38
-0.0154017	-0.0106606	-558.38
0.0683262	-0.0623601	-556.268
0.0468693	0.00872525	-556.624
-0.00276854	-0.0803661	-556.42
0.112246	-0.00740415	-551.867
0.101836	-0.0359144	-551.069
-0.0101098	0.0142498	-551.911
0.119521	0.0861886	-558.38
0.0903436	0.125957	-558.38
0.0905527	0.079627	-558.38
0.0741489	0.181639	-558.38
0.0520644	0.161044	-558.38
0.0479508	0.15365	-558.38
0.0337382	0.185724	-558.38
0.0393238	0.1379	-551.361
0.00996659	0.0436675	-552.636
-0.0449186	-0.0527122	-558.38
-0.0635027	0.034235	-558.38
-0.0656861	0.0115021	-558.38
-0.0827645	-0.00972291	-558.38
-0.0874539	-0.0289669	-558.38
-0.0874747	-0.0929419	-558.38
-0.102784	-0.20566	-558.38
-0.115708	-0.0276654	-558.38
-0.16296	-0.0554431	-558.38
-0.0484511	0.0158435	-554.571
-0.0493827	0.0250115	-556.754
-0.0795411	-0.208741	-555.342
-0.0989357	-0.0313521	-556.71
-0.0754215	-0.0064896	-552.588
-0.120367	-0.174227	-551.194
-0.17345	-0.0414186	-551.006
-0.183283	0.23802	-558.38
-0.188572	0.232884	-558.38
-0.165777	0.167401	-551.5
-0.231271	-0.0122534	-558.38
-0.206195	-0.214115	-549.612
-0.232846	0.004192	-550.109
-0.297957	0.108779	-555.451
-0.300387	0.142859	-547.72
0.313421	0.0422505	-473.094
0.301161	0.175414	-473.826
0.280939	0.0810292	-475.754
0.299493	0.157474	-470.554
0.301301	0.0826469	-472.32
0.2822	0.0896058	-473.05
0.282583	0.129698	-467.979
0.246239	-0.253502	-474.816
0.219691	-0.259051	-467.733
0.192435	0.0235102	-478.38
0.272453	-0.187394	-474.157
0.205645	-0.0751613	-476.055
0.120848	0.0139114	-474.389
0.267127	-0.00436761	-472.831
0.253757	-0.10523	-471.117
0.236363	-0.187565	-470.857
0.211429	0.0143024	-471.494
0.187689	-0.202493	-473.097
0.27254	0.00880908	-469.069
0.150975	0.0996526	-478.38
0.24109	0.221956	-475.819
0.234524	0.224779	-475.433
0.187094	0.187986	-473.585
0.18754	0.14298	-474.954
0.116325	0.110888	-474.362
0.216448	0.181639	-472.286
0.165159	0.194763	-471.784
0.210113	0.169542	-469.849
0.204602	0.169339	-467.668
0.198808	0.177374	-468.822
0.1879	0.0471699	-467.758
0.134363	0.0643614	-468.121
0.130567	0.157803	-468.954
0.266541	0.317887	-473.257
0.204668	0.313079	-467.042
0.106813	-0.00672241	-478.38
0.0583691	-0.110683	-474.154
0.0361701	-0.097509	-474.471
0.0278126	-0.0947261	-471.667
-0.0360105	-0.204255	-471.068
0.0495529	-0.0502953	-468.722
0.0359271	0.0222539	-470.041
0.0335435	-0.0661268	-467.694
0.0679621	0.0696312	-472.462
0.0571553	0.223879	-472.426
0.067202	0.166818	-468.764
0.0518309	0.269418	-467.288
-0.119581	-0.168127	-474.627
-0.0711031	-0.097619	-471.706
-0.0941466	-0.18897	-473.237
-0.165975	-0.131403	-470.346
-0.0671396	-0.0708361	-467.356
0.160809	0.0237896	-465.914
0.191658	0.221138	-465.505
0.0939768	-0.0255004	-465.688
0.0874976	-0.019833	-466.386
0.0399478	0.00944313	-465.974
-0.0420684	-0.147486	-466.53
0.0975698	0.0725881	-465.897
-0.114215	-0.207376	-466.036
-0.141838	-0.216329	-465.435
-0.159387	-0.212041	-464.792
0.233814	-0.264559	-392.923
0.203725	0.0304255	-391.514
0.206005	-0.0700844	-390.759
0.192915	0.028891	-392.586
0.298088	0.000801338	-387.89
0.299231	-0.146679	-389.274
0.279826	-0.147028	-389.156
0.237751	0.19615	-392.666
0.232405	0.0642997	-392.485
0.227923	0.16803	-392.783
0.215989	0.180407	-392.456
0.195247	0.152595	-392.626
[truncated: 802 more rows]
