# Supplementary material for: Spinal premotor interneurons controlling antagonistic muscles are spatially intermingled
Source: eLife. 2022 Dec 13;11:e81976. doi: 10.7554/eLife.81976 (PMC9844990; doi:10.7554/eLife.81976)
Supplement: Figure 3—figure supplement 1—source data 5. [file elife-81976-fig3-figsupp1-data5.xlsx]

## Sheet: Sheet1
0.207278	-0.0570463	20
0.0758838	-0.0522698	22
0.249535	-0.11995	22
0.234588	-0.101181	28
0.0655887	0.0955602	26
-0.012162	0.0298886	24
0.10509	0.0276618	12
0.105701	0.0488897	6
-0.0473707	-0.110008	2
0.0909296	0.214236	4
0.131398	0.207779	4
0.216442	0.144897	30
0.241432	0.161879	30
0.263196	0.196399	26
0.197097	0.0873927	22
0.231203	0.157672	22
0.108672	0.190566	12
0.0369619	0.17571	4
0.224772	0.12276	0
0.293702	0.108166	262
0.307732	0.0906982	258
0.0942556	0.115355	230
0.12729	0.191583	240
0.291488	0.228499	270
0.162399	0.00894577	266
0.143309	0.0204882	266
0.188887	0.0486354	260
0.173614	0.0360605	272
0.240686	-0.0323543	266
0.192629	-0.1101	258
0.191757	0.0307439	250
0.253534	0.0527115	252
0.30655	-0.0161347	252
0.231589	-0.0335177	250
0.253744	-0.115917	252
0.200783	-0.168228	246
0.225178	0.0112111	242
0.172437	0.0286095	238
0.242018	0.0554468	234
0.140334	0.037224	240
0.289244	0.0551771	246
0.208688	-0.0410689	238
0.193415	0.00349817	264
0.275744	-0.325045	264
0.243536	-0.357792	266
0.171991	-0.266431	254
-0.141708	-0.0271453	238
0.0490112	0.0373048	512
-0.22274	-0.0904206	512
-0.119722	-0.1475	510
0.0320313	0.195094	512
0.259736	0.165747	506
0.168853	0.0721485	494
0.205943	0.113522	490
0.271501	0.21409	484
0.261728	0.17971	480
0.367856	0.0119093	746
0.191472	0.0999184	750
0.352595	-0.132103	738
0.252524	-0.00709242	740
0.283641	-0.0349921	740
0.251108	-0.12916	734
0.358454	-0.151705	734
0.245302	-0.236097	730
0.152856	-0.0206589	728
0.401032	-0.118135	724
-0.117287	0.052278	722
-0.168154	-0.014567	728
-0.108189	-0.157788	730
0.127982	-0.0128691	724
0.165734	0.154823	716
0.0829085	0.157395	736
0.197704	0.0495088	710
0.165537	0.056162	714
0.113106	0.172407	716
0.184677	0.21825	720
0.238331	-0.00236832	740
0.208984	0.157206	744
0.195563	0.127884	8
0.121929	0.169426	6
0.326249	0.136083	0
0.188344	0.00717266	30
0.263758	0.0202414	30
0.275631	-0.0161286	26
0.290337	0.0620731	18
0.154704	-0.00418515	16
0.226755	0.00705421	14
0.374287	0.0134438	14
0.178862	0.038706	12
0.214928	0.0995749	10
0.237903	0.0926852	10
0.325833	0.104109	10
0.281863	0.0915863	4
0.222436	0.117816	0
0.334096	-0.261572	0
0.237415	-0.192859	6
0.351425	-0.121639	14
-0.0547773	-0.0931732	30
0.136173	0.081352	26
0.180402	0.0683865	26
0.228788	0.097557	28
0.13403	0.0893467	24
0.127513	0.0893988	22
0.0667735	0.205353	22
0.119668	0.0910037	22
0.263642	0.223527	18
0.237043	0.165119	16
0.0760036	0.170305	4
0.10115	0.146187	2
0.196092	0.111719	20
0.14716	0.118294	18
0.0587744	0.0683642	12
0.207644	0.119075	2
0.109825	0.0336137	0
0.0963224	-0.0453235	252
0.201146	-0.0364074	242
0.0664018	0.0034327	222
0.0835586	-0.023063	252
0.165331	0.0321574	248
0.141073	-0.00596636	244
0.280891	0.059931	228
0.212877	-0.210301	226
0.215846	-0.246538	220
0.197912	-0.195879	250
0.163337	-0.123644	252
0.327017	-0.104036	252
0.149314	0.0243038	252
-0.16999	0.0403043	246
0.0289849	0.0194349	248
-0.00216262	-0.071982	242
-0.141397	-0.172131	238
-0.107792	-0.182774	234
0.230805	0.106337	238
0.0741386	0.160186	228
0.214733	0.0823935	218
0.0798572	0.147732	242
0.205502	0.106079	252
0.210277	0.14643	252
0.1331	0.286189	224
0.067733	0.110019	242
0.183252	0.166823	246
0.230428	0.160609	248
0.311983	0.0227931	240
0.233035	0.17038	244
0.245701	0.129408	240
0.222038	0.144724	246
0.190068	0.0565133	234
0.292713	0.0275394	226
0.192294	0.0576437	486
0.159574	0.0299655	476
0.252833	-0.0814615	504
0.258982	-0.0239367	504
0.357703	-0.136494	498
0.261696	-0.146932	492
0.2039	0.0209289	490
0.239422	-0.0733503	508
0.171863	-0.0934001	512
0.218028	-0.152154	720
0.235077	0.0120973	754
0.177504	0.0345598	742
0.16164	-0.192591	744
0.266834	-0.182457	742
0.194297	-0.194905	746
0.240225	-0.219793	742
0.192275	-0.237622	736
0.255847	-0.219529	730
-0.146725	-0.114664	720
0.0221227	-0.149499	34
-0.0666859	-0.125075	34
-0.0736464	-0.0880321	30
-0.0759599	-0.0974988	28
-0.118309	-0.0927253	30
-0.0945676	-0.0983691	30
-0.104229	-0.15849	30
-0.141866	-0.212572	26
-0.0867284	-0.188711	22
-0.071864	-0.188724	24
-0.0948605	-0.165392	28
-0.106195	-0.118293	24
-0.0663979	-0.0801588	16
-0.12655	-0.058842	18
-0.0432425	-0.151467	12
-0.0686618	-0.144129	16
-0.115628	-0.199543	10
-0.162266	-0.15697	10
-0.155733	-0.138767	34
-0.274513	0.0085026	32
-0.246383	0.224549	10
0.170607	0.065055	30
0.142715	0.0746355	30
0.142661	0.0264451	28
0.25033	0.0943588	30
0.17025	0.0334547	30
0.158359	0.0805404	28
0.290405	0.0762356	30
0.236891	0.0773469	28
0.236925	0.0923972	26
0.212871	0.0862244	28
0.171128	0.100625	28
0.110648	0.0967556	30
0.186678	0.146867	26
0.136718	0.177229	24
0.11609	0.107816	26
0.124098	0.095671	24
0.13013	0.0869207	20
0.289437	0.105365	24
0.251412	0.106477	28
0.271798	0.143774	26
0.162371	0.0412008	18
0.134965	0.126421	14
0.136236	0.159494	16
0.134807	0.146124	18
0.152779	0.170775	20
0.165151	0.157566	22
0.297594	0.244467	20
0.117132	0.238809	22
0.226986	0.22072	18
0.244482	0.130746	12
0.278435	0.122732	8
0.261044	0.112516	8
0.270566	0.197856	8
0.231986	0.169235	8
0.152337	0.156676	6
0.146836	0.199048	8
0.105589	0.164643	8
0.12876	0.0732898	8
0.173457	0.0661864	8
0.20819	0.0754656	8
0.224603	0.074997	12
0.211546	0.111317	12
0.237819	0.0559967	10
0.241865	0.0734705	6
0.147422	0.0216448	8
0.0914746	0.168807	12
0.219658	0.142368	14
0.372129	0.102982	12
0.237129	0.211086	24
0.162395	0.0581926	18
0.247019	0.108639	16
0.215682	0.384217	18
0.0829353	0.15533	28
0.0556295	0.199858	24
0.1005	0.101168	20
0.0897965	0.137669	16
0.0726534	0.173667	12
0.084524	0.163083	8
0.040929	-0.0184513	16
0.0520251	0.0103772	12
0.187338	-0.00875701	14
0.18985	-0.0203259	10
0.187373	0.00381613	8
0.22367	-0.00220264	10
0.213298	-0.0181835	8
0.0781096	0.0675388	10
0.0673611	0.0741467	12
0.0597899	0.0232918	14
0.0822006	0.0464095	14
0.095357	0.11441	12
0.0833524	0.119847	10
0.0500392	0.106336	10
0.105197	0.0656843	12
0.0751159	-0.0402367	24
0.213075	-0.00672844	26
0.107789	0.0456663	26
0.103757	0.0746221	26
0.138063	-0.00210891	22
0.120156	0.0929864	18
0.24326	0.0269338	18
0.305418	0.0370968	30
0.187005	-0.143647	26
0.258318	-0.129856	24
0.241463	-0.0387571	30
0.19486	-0.0856888	30
0.238618	-0.0214975	26
0.278639	-0.00383621	24
0.315626	0.0445014	26
0.154531	-0.0382015	22
0.289095	-0.178361	22
0.198295	-0.137039	24
0.275496	-0.09701	22
0.23	-0.0748564	20
0.21309	0.00395672	18
0.267677	0.0423992	16
0.332953	0.00661462	18
0.280406	0.00790006	20
0.274925	0.0372976	20
0.238038	-0.111826	16
0.262484	-0.141692	16
0.236603	-0.182572	14
0.312324	-0.0239144	16
0.325967	0.0314329	14
0.293389	0.0234525	12
0.258626	-0.108278	8
0.155792	-0.0554745	8
0.35436	-0.00821472	6
0.346621	-0.0823681	6
0.226326	-0.024517	24
0.249844	-0.101335	28
0.263412	-0.17105	30
0.217384	-0.132862	26
0.22501	-0.141799	28
0.151438	-0.0709867	14
0.259763	-0.30912	28
0.199099	-0.25943	28
0.255057	-0.2413	22
0.300553	-0.201559	20
0.320774	-0.307406	18
0.3847	-0.151862	12
0.249546	-0.304507	24
0.237526	-0.283291	6
0.258457	-0.320508	16
0.225129	-0.255794	10
-0.243479	0.222563	266
-0.0411564	0.0319389	248
-0.143272	-0.106663	270
-0.0770657	-0.179993	266
-0.00423922	-0.10054	258
-0.133037	-0.190019	258
-0.0843134	-0.153553	254
-0.142265	-0.184584	252
-0.0709829	-0.133084	248
-0.149355	-0.117629	236
-0.036279	-0.0779524	238
-0.0509162	0.0211749	268
-0.104603	-0.18307	252
0.343534	-0.242622	244
0.340297	-0.201452	246
0.189286	-0.240207	246
0.221184	-0.213653	254
0.199871	-0.195001	254
0.283192	-0.192251	254
0.302408	-0.176972	250
0.258785	-0.27743	266
0.281592	-0.0815845	272
0.158436	-0.013734	272
0.334215	0.0937736	272
0.193545	-0.0247251	270
0.217264	0.0105559	268
0.203123	0.0379168	266
0.17473	0.021692	262
0.161268	0.0378159	266
0.190709	0.0985471	266
0.210553	0.101959	270
0.184733	0.111348	266
0.25296	0.109954	266
0.242861	0.0777191	270
0.289412	0.0740176	268
0.308298	0.098894	262
0.352027	0.0872597	260
0.120081	0.0881867	268
0.38973	-0.0704485	244
0.276927	-0.0703287	238
0.368741	-0.0712178	238
0.246452	-0.0677622	246
0.232975	-0.118303	246
0.365241	-0.0987678	258
0.260872	-0.0436551	260
0.305234	-0.0353188	264
0.294476	-0.0307849	264
0.3655	-0.0728384	260
0.316817	-0.00439515	256
0.212331	-0.0309363	256
0.206111	-0.0577486	256
0.203923	-0.0198633	250
0.295829	0.000939565	248
0.255407	-0.0256772	236
0.229222	-0.0122963	238
0.111805	-0.0582215	238
0.141277	-0.0753292	260
0.211779	-0.0220892	262
0.204364	-0.0251476	236
0.102222	0.219972	238
0.10279	0.168214	240
0.0895149	0.158427	242
0.106254	0.0747553	244
0.0766858	0.0875561	244
0.090462	0.100653	244
0.14231	-0.00952807	236
0.152855	0.0119558	238
0.163618	0.0159474	238
0.153448	0.0403067	240
0.195652	0.0379042	238
0.208102	0.00070625	238
0.197177	0.174419	246
0.17984	0.133891	246
0.190542	0.143596	252
0.125014	0.128405	254
0.125475	0.155306	252
0.103727	0.139049	252
0.0471987	0.099657	254
0.149026	0.220148	250
0.0743256	0.217683	254
0.0607216	0.184949	252
0.0725985	0.0700449	252
0.156152	0.137687	270
0.106249	0.178467	270
0.111977	0.150122	270
0.0941289	0.166013	270
0.0943821	0.148174	270
0.119103	0.0987805	260
0.112914	0.0898451	260
0.108715	0.0655236	262
0.051215	0.0763885	256
0.097421	0.0896875	256
0.057389	0.0284518	248
0.111086	0.0544885	268
0.188476	0.0767227	250
0.169883	0.0967752	248
0.189392	0.0218118	246
0.151908	0.284833	254
0.173296	0.205903	256
0.267157	0.184476	242
0.262953	0.212008	256
0.23342	0.190839	266
0.309438	0.370554	280
0.217497	0.158244	246
0.217421	0.148571	238
0.254211	0.119848	244
0.250575	0.137107	254
0.266022	0.124735	256
0.271168	0.0912892	252
0.2991	0.0932313	252
0.263667	0.140783	262
0.282468	0.152594	266
0.301998	0.041158	240
0.261596	0.0299211	246
0.275777	0.0134061	250
0.207053	0.0788415	252
0.227039	0.0747679	250
0.285355	-0.00819124	260
0.320469	0.0300283	240
0.281338	0.0150772	258
0.335217	0.13019	258
0.317972	-0.206982	238
0.336023	-0.227362	238
-0.256593	0.25122	514
-0.117121	-0.173397	520
-0.190335	-0.174343	536
-0.219978	-0.0290046	540
-0.0828315	-0.129452	548
-0.131974	-0.150076	550
-0.151872	-0.146386	528
-0.0962615	-0.120405	538
-0.25962	-0.000952336	536
0.223477	0.220579	556
0.202469	0.202246	556
0.200292	0.150362	556
0.197738	0.0653957	556
0.205119	0.175742	554
0.1503	0.127149	554
0.0469173	0.088972	550
0.0284053	0.0825199	556
0.151968	0.158332	548
0.12078	0.182902	536
0.0787319	0.1355	536
0.194971	0.129875	530
0.237768	0.151356	524
0.237375	0.136851	524
0.262684	0.0937872	524
0.298715	0.0834484	524
0.227041	0.0707288	526
0.106112	0.171147	526
0.103834	0.230733	532
0.223376	0.287873	540
0.174728	0.114941	532
0.299772	0.164927	528
0.193298	0.146594	544
0.119946	0.117554	544
0.234459	0.188098	544
0.29931	0.0959121	544
0.223711	0.0893053	544
0.148909	0.0968347	536
0.16254	0.0931801	538
0.19179	0.113786	538
0.140709	0.0904362	538
0.39008	0.179164	546
0.341113	0.138327	536
0.305767	0.104983	536
0.272312	0.0821985	536
0.239254	0.066479	536
0.198253	0.170754	530
0.0896447	0.0264154	530
0.353481	0.0773237	522
0.306601	0.056158	526
0.195683	0.0343734	524
0.159519	0.0570806	524
0.131475	0.0391053	554
0.256673	0.0507119	554
0.290914	0.0583127	554
0.333668	0.032308	554
0.337863	0.0456347	552
0.31181	0.0188205	554
0.279523	-0.0930015	554
0.265541	-0.0563604	554
0.321528	-0.0489143	554
0.239031	-0.023356	554
0.158159	0.0375042	550
0.330997	-0.00725561	548
0.248882	-0.00394624	550
0.201774	-0.041248	544
0.213807	-0.0252845	522
0.327858	0.0204276	524
0.243731	-0.0813949	528
0.263114	-0.190449	528
0.23473	-0.0024225	532
0.209745	-0.0509857	532
0.281631	-0.055164	532
0.292342	-0.00385696	534
0.244671	-0.0428789	540
0.217546	-4.16647e-05	542
0.344395	0.0208502	540
0.341607	-0.168611	548
0.271605	-0.146439	536
0.322107	-0.056914	556
0.244007	-0.214585	524
0.0565829	0.0832702	520
-0.201415	-0.139613	520
-0.135744	0.100527	520
-0.106201	-0.152616	520
-0.140621	-0.104532	520
-0.139887	-0.138091	520
-0.0917709	-0.0995923	520
-0.0926301	-0.0858903	520
-0.195935	-0.197714	520
-0.110742	-0.142711	520
0.175496	0.0385053	522
0.244876	-0.186887	518
0.344078	-0.0409621	516
0.266533	-0.232214	514
0.304691	-0.0247118	506
0.227897	0.00101278	506
0.187741	0.017557	504
0.243994	-0.0993832	494
0.136496	-0.0038943	508
0.232938	0.0962534	504
0.323013	-0.153244	500
0.332755	-0.104996	500
0.209711	0.0477771	492
0.318347	-0.0118593	490
0.231618	-0.0356695	514
0.2393	-0.0469277	500
0.189664	0.151015	494
0.119306	0.246393	512
0.135136	0.0768602	508
-0.192	0.0125158	750
-0.187934	-0.115789	748
-0.147177	-0.0629187	748
-0.151249	-0.0772169	744
-0.131416	-0.112616	740
-0.219094	-0.119021	738
-0.153618	-0.139254	736
-0.122407	-0.10187	730
-0.140781	-0.170802	734
-0.0976203	-0.113837	742
-0.0828715	-0.0613779	742
-0.134249	-0.152691	742
-0.0695422	-0.121195	726
-0.215746	-0.13189	722
-0.290548	0.221191	750
0.0483181	0.0622266	752
0.271128	0.100864	748
0.2743	0.194084	750
0.105894	0.0430252	750
0.132858	0.0902746	746
0.158674	0.113961	744
0.186385	0.160173	748
0.154619	0.0676194	746
0.187193	0.0751538	742
0.235551	0.059047	738
0.211827	0.100701	734
0.167298	0.132405	734
0.19178	0.146749	736
0.307955	0.0807229	730
0.220112	0.0849536	728
0.213773	0.154845	728
0.123227	0.0489338	730
0.164109	0.0658371	736
0.146114	0.188064	736
-0.0137309	0.176619	730
0.249508	0.213135	730
0.160484	0.055874	726
0.118658	0.244212	724
0.324242	0.0798415	722
0.298912	0.110834	720
0.222657	0.160029	720
0.182856	0.152403	722
0.335812	0.0439262	720
0.295943	0.0273233	722
0.25488	-0.0280023	722
0.248281	-0.0102503	724
0.29976	-0.0250251	732
0.301559	-0.0395127	740
0.284248	-0.045911	742
0.30209	0.0452516	744
0.290785	0.026801	748
0.359242	0.0070577	748
0.30748	0.0855412	742
0.21064	0.0355888	740
0.287132	-0.158756	722
0.271959	-0.102144	718
0.219756	-0.109241	722
0.369664	-0.146155	730
0.321505	-0.179433	730
0.312247	-0.0984683	726
0.274617	-0.125831	730
0.217177	-0.0859394	742
0.292465	-0.062997	744
0.206772	-0.015036	734
0.202937	-0.164521	740
0.177274	-0.0293081	748
0.183319	-0.142865	750
0.196604	0.0019492	330
0.183349	0.0128115	330
0.200099	0.109318	328
0.122624	0.0132151	328
0.0903836	0.0213382	328
0.0840621	-0.000927373	328
0.118945	0.0352573	328
0.223604	-0.0298992	328
0.282309	-0.0180065	328
0.240533	-0.0893198	326
0.184497	-0.0512288	322
0.229161	-0.00714421	322
0.148491	-0.0409761	322
0.172369	-0.0196552	322
0.240941	0.0249446	322
0.18217	0.117347	322
0.178201	0.0688832	324
0.115843	0.105712	316
0.0953785	0.134057	316
0.0749906	0.115157	316
0.111389	0.00358069	316
0.239002	0.160152	312
0.266044	0.131696	312
0.276513	0.0830943	312
0.171262	0.0948926	312
0.0970979	0.196534	308
0.145956	0.204675	302
0.102904	0.156125	298
0.126619	0.147281	298
0.127404	0.121967	298
0.133619	0.0669769	300
0.159879	0.0448488	300
0.159782	-0.00203507	302
0.168951	0.0749884	300
0.240441	0.0939738	300
0.310172	0.0306119	320
0.289034	0.0223428	318
0.265089	0.0477254	302
0.0883529	0.0547837	312
0.187548	0.113586	294
0.235477	0.0457676	302
0.29359	0.0473475	298
0.25187	0.0323378	332
0.0692915	0.316415	332
0.108751	0.101024	332
0.111113	0.114513	330
0.0594853	0.221316	324
0.177992	0.0857906	324
0.111603	0.0519157	322
0.0861692	0.0817548	322
0.123231	-0.0116866	320
0.0693885	0.0460166	320
0.184619	0.105274	320
0.18067	0.0605454	320
0.18716	0.0653454	318
-0.0298728	0.116119	318
0.0627762	0.134323	318
0.0244951	0.121391	316
0.215482	-0.00216387	316
0.207548	0.0318398	316
0.198415	0.0527486	316
0.215262	0.024335	314
0.240023	0.0314105	310
0.209089	-0.00917927	310
0.215992	0.0460252	302
0.225599	-0.0670886	300
0.193084	-0.0275979	300
0.32517	0.0917651	298
0.0579544	0.00180628	296
0.290275	0.205272	294
0.300704	0.129386	294
0.144548	0.0399973	310
0.128259	0.087316	304
0.114602	0.0565056	310
0.194202	0.0266353	314
0.267931	0.0522416	320
0.295922	0.0617912	308
0.108396	0.120473	330
0.108446	0.201593	328
0.193682	0.184752	326
0.0517205	0.125241	328
0.144045	0.0761748	328
0.232773	0.0537517	322
0.259725	0.0729546	314
0.249877	0.0789953	312
0.23646	0.151409	298
0.153569	0.153941	302
0.198291	0.0994788	796
0.239415	0.0911951	796
0.298028	0.143703	782
0.121137	0.354853	782
0.111881	0.165556	782
0.108329	0.0427882	776
0.268266	0.0983536	776
0.257737	0.100693	776
0.241258	0.128328	776
0.109468	0.0884487	798
0.0811809	0.0736431	798
0.378835	-0.111701	794
0.312881	0.00122146	788
0.248615	-0.00676616	788
0.341934	0.00869829	788
0.2439	-0.0174262	788
0.180226	-0.0497542	788
0.171316	0.0076545	788
0.213367	-0.183005	786
0.379555	-0.0576974	784
0.260569	-0.0292041	784
0.270445	-0.0421219	778
-0.102141	-0.150502	15.9988
0.175038	-0.154752	3.65985
0.303967	-0.0530371	2.28421
0.297842	0.0844012	9.96379
0.287879	0.104617	17.2214
0.180622	0.0695801	14.8308
0.219864	0.113956	9.83586
0.186716	0.123315	11.9863
0.180638	0.173442	20.7632
0.230598	0.211754	26.1338
0.126017	0.0555439	16.6905
0.0419773	0.0120217	18.3006
0.245037	0.203515	19.3422
0.23571	0.269546	29.186
0.0713016	0.0561236	13.7735
0.0982557	0.193881	20.3292
-0.138371	-0.127726	85.9745
0.133069	-0.0460039	82.734
0.0470973	0.0147337	81.0971
0.30372	-0.00515868	73.2235
0.220438	0.0410408	82.5015
0.232393	-0.0131636	80.682
0.187643	0.0131647	77.0367
0.165572	0.0101728	83.1946
0.126118	0.09022	80.9781
0.199354	0.0677121	83.8597
0.204073	0.0494257	77.5947
0.212639	0.132368	79.7001
0.247469	0.196196	86.1254
0.185517	0.210221	82.681
0.159992	0.265266	90.0629
-0.0720473	-0.0524428	186.622
0.196867	-0.278811	147.078
0.251673	-0.275574	146.633
0.313783	-0.0727033	137.693
0.173856	-0.0923096	158.6
0.250697	0.042861	152.532
0.236641	0.0964444	160.812
0.147681	0.0417288	164.021
0.181335	0.156209	168.206
0.092727	0.178333	178.556
0.0899697	0.158608	172.842
0.214757	0.17244	159.179
0.218212	0.203981	153.812
0.256098	0.171008	160.152
0.347224	-0.369493	128.658
0.226736	0.0623521	228.944
0.272912	-0.0744436	229.835
0.227931	-0.258484	226.605
0.411571	-0.247594	222.164
0.231749	-0.333584	219.108
0.109806	0.0355943	236.79
-0.152562	-0.23496	230.221
0.178608	0.0939727	236.683
0.196341	0.142599	231.995
0.245891	0.19828	237.917
0.279157	0.268033	233.43
-0.156319	-0.286643	344.199
-0.0780172	-0.219597	339.474
0.00793744	-0.0670214	339.912
0.117164	0.0956124	335.118
0.111089	0.160942	333.199
0.240212	0.0238007	336.969
0.229872	-0.0111145	332.37
0.259359	0.107575	334.449
0.312451	0.0955756	326.884
0.296933	0.158518	332.368
0.252047	0.18298	326.624
0.227678	0.232855	325.802
0.27805	0.220249	328.508
0.219056	0.208021	325.956
0.192765	0.148537	333.385
0.259651	-0.138039	335.57
0.279734	-0.107125	337.082
0.378643	-0.26026	326.58
-0.111995	-0.127834	401.662
-0.127989	-0.0887595	399.906
-0.078331	-0.053095	397.646
-0.0349747	-0.0234223	400.738
0.336824	-0.272027	406.106
0.202311	-0.15776	404.414
0.300852	0.0237667	406.351
0.31194	0.0749004	412.671
0.303819	0.0646352	412.395
0.243854	0.0942458	404.068
0.22045	0.0519941	404.988
0.147925	0.0592779	407.267
0.102249	0.0945297	401.145
0.127891	0.201384	404.654
0.0991727	0.214441	406.049
0.223505	0.187906	406.488
0.280198	0.166534	407.433
0.354518	0.277615	415.693
0.232812	0.395124	414.42
0.302573	0.0604974	474.764
0.228464	0.0271485	475.902
0.186323	0.0379342	476.417
0.183199	0.0433193	476.435
0.166036	0.0390195	476.683
0.122314	0.0896465	477.044
0.130098	0.126253	476.777
0.102676	0.344852	476.176
0.0505486	0.0509127	478.174
-0.0827212	-0.199	479.204
0.19328	0.166068	475.757
0.247869	0.225268	474.765
0.279884	0.178953	474.542
0.23382	0.142394	473.47
0.270595	0.19782	560.436
0.294015	0.16356	557.833
0.31352	0.221444	560.939
0.29897	0.0494165	559.484
0.365894	0.0404258	555.515
0.260239	-0.130911	562.497
0.225117	-0.111905	561.763
0.299869	-0.345936	561.174
0.0947862	0.170439	562.281
0.166822	0.224349	563.725
-0.175859	-0.165742	656.923
-0.176487	-0.202139	649.528
0.118088	-0.274643	647.229
0.347699	0.0206549	633.63
0.353196	0.0554185	638.127
0.158491	0.183226	637.811
0.0432092	0.0635007	641.559
0.112879	0.087919	633.295
0.0835688	0.211453	633.741
0.207764	0.218497	632.651
0.213272	0.189716	630.453
0.24074	0.279439	635.653
0.265105	0.210876	633.927
-0.104939	-0.121296	707.07
0.129042	-0.0903315	707.915
0.2471	-0.161097	705.417
0.30754	-0.111526	711.13
0.23536	-0.00630009	705.351
0.268338	0.0304109	711.243
0.344588	0.0549344	705.311
0.28817	0.1178	715.51
0.232727	0.105635	718.672
0.224794	0.177433	717.384
0.237898	0.17042	711.539
0.250291	0.175877	717.069
0.129336	0.152353	709.618
0.154672	0.063831	713.165
0.408622	-0.138806	709.547
0.107808	0.133505	712.27
-0.131746	-0.201838	791.819
-0.151876	-0.17726	780.391
0.319062	-0.134783	796.468
0.27215	-0.285715	770.614
0.304062	-0.3637	771.442
-0.115709	-0.164542	310
-0.057355	-0.0900397	308
0.0096269	-0.0321402	306
-0.11365	-0.115705	302
0.176316	0.00076823	298
0.145908	0.0192293	300
0.172971	-0.00976749	302
0.173372	0.0534076	300
0.203565	0.0260101	292
0.0145035	0.00148159	288
0.101684	-0.0223179	286
0.231463	-0.216123	288
0.189496	-0.263236	284
0.193801	-0.170798	282
0.148088	-0.280365	282
0.325711	-0.265118	282
0.336793	-0.264679	282
0.234445	-0.3098	284
0.183394	-0.298638	276
0.0837699	-0.217864	280
0.0738684	-0.157181	312
0.209205	0.0347663	298
0.183449	0.0613094	284
0.237531	-0.0703244	276
0.295682	-0.0499271	286
0.327721	-0.0827336	308
0.367074	-0.10299	304
0.361423	-0.100905	304
0.207431	0.222724	300
0.201193	0.161234	298
0.255434	0.159321	300
0.203087	0.116708	294
0.202319	0.212745	288
0.257504	0.192222	294
0.237767	0.12374	292
0.164613	0.196737	282
0.168122	0.176136	306
0.213769	0.153278	308
0.157364	0.247566	316
0.286665	0.1052	290
0.239321	0.228086	762
0.278043	0.119146	784
0.270157	0.0829139	786
0.0968071	0.0751219	786
0.104973	0.126664	786
0.0783771	0.216798	770
0.0729403	0.173847	766
0.10159	0.262899	758
0.101349	0.219957	756
0.101349	0.219957	788
0.295485	0.108448	776
0.248379	0.154641	768
0.234799	0.16028	788
0.21351	0.0893745	774
0.197983	0.108655	758
0.192479	0.102895	760
0.17434	0.0708132	770
0.183401	0.0608954	770
0.240985	0.189557	768
0.232367	0.143784	774
0.25346	0.139754	782
0.189851	0.168425	786
0.245983	0.113489	770
0.233234	0.073654	782
0.251477	0.0673245	784
0.218518	0.141107	784
0.269755	0.158693	764
0.240938	0.231756	760
0.245972	0.218527	756
0.203126	0.167272	758
0.262383	-0.13758	254
0.259404	-0.128748	252
0.244968	-0.144708	256
0.206221	-0.0318394	258
0.0986805	-0.0894655	260
0.194643	-0.138946	262
0.113436	-0.213227	262
0.229076	-0.275734	260
0.206734	-0.230892	258
0.184276	-0.221462	254
0.192156	-0.234375	258
-0.265086	0.243414	268
-0.117247	-0.123647	266
-0.146496	-0.0791727	278
-0.15278	-0.156537	278
-0.145731	-0.0414803	282
-0.193585	0.0255499	284
-0.187252	-0.0032804	290
-0.0963361	-0.12001	288
-0.0873122	-0.126864	284
-0.0747635	-0.134482	282
-0.166731	-0.174226	280
-0.192865	-0.125934	282
-0.108223	-0.149455	278
-0.0944652	-0.110712	276
-0.195555	-0.199397	274
-0.184399	-0.156501	272
0.00460083	-0.0431526	272
0.241011	0.43029	264
0.270398	0.361866	262
0.166346	0.295615	260
0.250573	0.375616	258
0.052564	0.265305	258
0.0620224	0.385965	264
0.248376	0.216592	262
0.204322	0.230393	262
0.170349	0.254685	256
0.206796	0.197353	252
0.247561	0.172403	250
0.211263	0.219244	250
0.163631	0.177799	250
0.233073	0.17782	252
0.268255	0.220001	250
0.224602	0.247123	246
0.1085	0.398736	244
0.257336	0.387037	240
0.236509	0.157824	252
0.129811	0.16199	242
0.152193	0.146782	266
0.097822	0.164449	266
0.114971	0.21254	278
0.102842	0.138913	274
0.183495	0.19017	274
0.232026	0.189313	272
0.172043	0.162262	268
0.134229	0.193229	264
0.128863	0.166486	266
0.193245	0.15112	264
0.355059	0.251004	264
0.107744	0.138291	270
0.259133	0.175398	272
0.202269	0.0227913	272
0.227203	0.00788296	274
0.106732	0.0736625	276
0.146842	0.0764069	272
0.184468	0.036163	268
0.189853	0.0143437	264
0.244076	0.0507354	262
0.257839	0.0750561	266
0.225071	-0.0454539	268
0.247749	-0.0509498	270
0.271192	-0.0363488	272
0.281243	-0.0217049	262
0.246905	-0.0328898	260
0.260362	-0.0271365	258
0.0795174	-0.0463615	256
0.040667	0.00723975	254
0.0729666	0.0342405	258
0.107256	0.0833036	260
0.114651	0.0876131	258
0.163576	0.0856763	256
0.23248	0.149462	258
0.251841	0.154029	254
0.218727	0.111834	254
0.24572	0.102822	244
0.267658	0.0615986	244
0.176796	0.0480053	248
0.112089	0.0741056	240
0.111694	0.126671	244
0.166504	0.0535584	246
0.158112	0.0776933	250
0.134797	0.0616701	248
0.187484	-0.0144509	248
0.105612	0.103529	246
0.0813933	0.0864625	248
0.029392	0.0542588	246
0.162959	0.0595332	244
0.130418	0.0943812	244
0.100532	0.117594	252
0.190954	0.0570675	256
0.163384	0.120639	254
0.231143	0.0479696	252
0.255317	-0.00467403	262
0.223683	-0.00608911	276
0.171149	0.037671	268
0.238858	0.129851	264
0.251254	0.142922	264
0.24534	0.115764	266
0.220065	0.141014	266
0.162638	0.133224	256
0.198887	0.13003	254
0.229321	-0.0241063	252
0.207235	-0.0294807	248
0.204984	-0.0463973	248
0.296117	0.0638356	258
0.322547	0.0433885	286
0.312644	0.0401509	276
0.284427	0.0471763	274
0.281485	0.0845257	260
0.337342	-0.0121639	260
0.313094	0.149612	262
0.315991	0.115271	256
0.309529	0.0361987	238
0.335846	0.0271365	248
0.235452	-0.081624	766
0.346035	-0.00581038	768
0.233611	-0.311809	764
0.285997	-0.0798731	760
0.241998	-0.212411	748
0.267416	-0.187712	742
0.237674	-0.159467	744
0.208607	-0.171517	740
0.290228	-0.0797873	734
0.366744	-0.101614	736
0.280759	-0.254806	756
-0.0852437	0.0587732	744
0.0571835	0.139992	744
-0.183083	0.166821	742
-0.127613	0.243682	740
-0.253157	0.241175	738
0.0511183	0.107259	732
-0.0578342	0.0409111	770
-0.167478	0.248723	770
-0.131639	0.0929454	766
-0.281589	0.125492	764
-0.126823	-0.102211	770
-0.162279	0.0117069	760
-0.145303	-0.0151228	756
-0.106245	-0.0931642	752
-0.110823	-0.0806084	756
-0.193714	-0.15544	758
-0.156661	-0.133531	750
0.0649974	0.122601	748
0.207314	0.133206	744
0.157364	0.130898	744
0.131029	0.220879	742
0.299826	0.046277	744
0.144025	0.248683	740
0.194556	0.13383	740
0.283977	0.0785323	754
0.170819	0.138778	766
0.339418	0.0608426	744
0.148719	0.0715214	746
0.161506	0.145955	772
0.266281	0.185042	766
0.256568	0.135926	766
0.176291	0.0776568	758
0.0614477	0.102835	752
0.285087	0.0417999	752
0.275606	0.0941658	748
0.0563528	0.0090007	748
0.428211	0.0904382	742
0.392645	0.00925938	738
0.331168	0.021351	744
0.336716	-0.0303251	740
0.311979	-0.0375814	738
0.262464	-0.0255761	736
0.289345	-0.15668	756
0.352821	-0.185937	766
-0.012581	-0.0671253	6.16718
-0.00611733	-0.0471012	10.3039
0.084211	-0.00453296	3.18553
0.0965349	-0.00651874	4.5861
0.0704686	0.0660356	7.30132
0.1565	0.109387	6.77933
0.155295	0.00298978	7.9984
0.140904	0.131507	9.64883
0.182253	0.125013	9.72222
0.178627	-0.166364	8.00249
0.229439	0.179142	10.596
0.235457	0.112762	3.81586
0.229461	0.0314053	6.66151
0.201776	-0.0577817	8.65658
0.249049	0.107952	8.62158
0.0890032	0.183729	13.2585
0.0673519	0.0243709	15.4644
0.180386	0.108566	18.07
0.216076	0.151359	13.2368
0.304738	0.134465	18.07
0.0430162	0.21723	86.5818
0.139279	0.146072	87.0277
0.150443	0.190929	85.7396
0.0329692	0.183981	89.9583
0.121495	0.193511	88.543
0.154179	0.149995	90.3774
0.110489	0.104475	83.0446
0.128285	0.106874	88.2727
0.106479	0.0884214	89.6393
0.199757	0.170267	85.5431
0.208973	0.118103	85.9572
0.240953	0.128644	89.2502
0.162518	-0.0986188	87.6587
0.181921	-0.00237791	86.9475
0.163873	0.0271135	90.2011
0.209243	-0.30495	90.7194
-0.193778	-0.173624	92.539
0.153028	0.20488	93.7108
0.106685	0.218604	95.7454
-0.12125	-0.0160048	161.39
-0.030058	-0.00228924	161.39
-0.160486	-0.147237	161.39
-0.0853917	-0.0939825	161.39
-0.0505035	-0.125378	170.62
0.104259	0.197069	161.39
0.18009	0.159997	161.39
0.211226	0.140511	161.39
0.029013	0.0038683	161.39
0.0787516	0.0283795	161.39
0.133852	0.0557883	161.39
0.197644	0.121084	161.39
0.0758449	0.136526	163.557
0.138503	-0.0889631	162.835
0.22586	0.172883	167.804
0.229258	0.0905797	161.39
0.30581	0.0392133	167.764
0.324157	0.0122649	169.135
0.367705	-0.284436	161.39
0.210038	-0.305759	170.028
0.272788	-0.303623	169.127
-0.193225	-0.171841	171.467
-0.00813808	-0.0477717	243.763
0.227125	0.193135	241.39
0.233447	0.168012	241.39
0.0952103	0.143919	242.85
0.0298269	0.0277722	241.39
0.0734475	0.0871095	245.376
0.138336	0.128657	244.591
0.206536	0.0995706	245.52
0.0636937	0.0144991	246.955
0.109525	0.0931168	249.228
0.28926	0.117541	248.014
0.29571	-0.0961782	247.168
0.35276	0.0252675	251.036
0.2782	-0.121687	244.28
0.240231	-0.263678	248.056
0.318356	-0.350976	247.559
0.334706	-0.367675	246.777
0.305774	-0.136965	248.824
-0.0798942	-0.1439	255.43
0.0373994	0.140787	252.782
0.146701	-0.0157909	253.02
-0.144675	0.0928038	323.796
-0.125236	-0.186636	327.757
0.127825	0.168962	321.39
0.0393305	-0.0110915	321.39
0.0620408	0.0376342	321.39
0.0651488	0.0263057	321.39
0.110068	0.108006	321.39
0.0917979	0.0354615	323.712
0.0382036	0.0188806	327.085
0.0839265	0.0735865	325.894
0.172792	0.170085	321.39
0.258747	0.250358	324.19
0.158498	0.0909721	321.39
0.163003	0.0123332	321.39
0.180679	0.0587322	321.39
0.190963	0.118601	321.39
0.257953	-0.0317079	321.39
0.259266	0.0339556	321.39
0.269483	0.0393783	321.39
0.177608	-0.0501343	326.479
0.215136	0.0441786	327.565
0.236425	0.0170924	327.136
0.162268	-0.26444	324.679
0.231424	-0.264614	327.359
0.197026	-0.252507	329.675
0.32363	0.0700415	327.088
-0.0706299	-0.191757	401.39
-0.182417	-0.226067	405.948
0.0791802	0.165994	401.39
0.00555972	-0.0585373	401.39
0.0323548	0.0180126	401.39
0.143444	0.101748	401.39
0.15453	0.0421513	401.39
0.166763	0.132819	401.39
0.172149	0.115522	401.39
0.17548	-0.0140291	401.39
0.0388946	0.058511	403.898
0.0481541	0.0317024	403.858
0.0848292	0.00546904	403.693
0.129557	-0.298652	401.39
0.273027	0.150961	401.39
0.208719	0.0696752	401.39
0.225366	0.015397	401.39
0.293901	0.00919887	401.39
0.195704	0.144635	404.131
0.199033	-0.169217	401.39
-0.0866759	0.0241485	481.39
-0.136725	-0.12942	481.39
-0.131761	-0.244602	481.39
-0.123013	-0.119103	481.39
-0.106366	-0.216171	481.39
-0.0849656	-0.233894	481.39
-0.0762502	-0.139616	481.39
0.0618978	0.13972	481.39
0.112516	0.0835477	481.39
0.141741	0.0867698	481.39
0.154159	0.0775929	481.39
0.168323	0.117355	481.39
0.179408	0.132405	481.39
0.0541581	-0.183421	481.39
0.115529	-0.283521	481.39
0.119444	-0.265446	481.39
0.185374	-0.0574468	481.39
0.211425	0.178072	481.39
0.195675	0.153888	481.39
0.199953	0.0299336	481.39
0.218066	0.0612901	481.39
0.295064	0.131267	481.39
0.216393	-0.126916	481.39
0.284148	-0.0721346	481.39
-0.075242	-0.0140784	561.39
-0.0663477	-0.02759	561.39
0.0853676	0.148475	561.39
0.106634	0.181907	561.39
0.00602938	0.0536729	561.39
0.0439074	0.00329374	561.39
0.0638603	0.0815148	561.39
0.0763413	0.0146281	561.39
0.091184	0.126611	561.39
0.0937047	0.104748	561.39
0.0962407	-0.0722003	561.39
-0.0381181	-0.203981	561.39
0.108583	-0.264234	561.39
0.109842	-0.151149	561.39
0.135874	0.161682	561.39
0.175788	0.191133	561.39
0.194251	0.172621	561.39
0.196844	0.157123	561.39
0.237972	0.168591	561.39
0.241721	0.223781	561.39
0.129638	0.110466	561.39
0.139356	0.0889558	561.39
0.172461	0.0835861	561.39
0.202619	-0.0761894	561.39
0.239014	0.0497481	561.39
0.1396	-0.298066	561.39
0.209696	-0.356732	561.39
0.212527	-0.21813	561.39
0.30372	0.0760651	561.39
-0.0406774	-0.0297459	647.985
-0.165347	-0.259572	648.144
-0.118202	-0.224254	649.688
0.0923072	0.236193	647.533
0.0952056	0.0474989	641.39
0.040206	0.0273404	649.847
0.106449	0.0742156	649.209
0.127884	0.0620544	650.405
0.208347	0.116529	642.941
0.162435	0.115131	647.759
0.178834	0.154719	649.177
0.189526	0.0479375	641.39
0.319105	0.020344	641.39
0.212593	-0.0723428	643.962
0.216425	0.0716419	647.005
0.226492	-0.248	647.975
0.353424	-0.334192	641.39
0.368614	-0.322956	643.492
0.175671	0.186894	651.128
0.225589	0.171119	651.78
0.298626	0.128992	651.559
0.171818	-0.194206	652.189
0.254628	-0.341697	651.721
-0.163797	-0.00466405	727.255
-0.152942	0.0262277	725.942
-0.120637	-0.159039	730.546
0.117693	0.195801	727.554
0.180329	0.13997	728.213
0.0858391	0.201495	729.814
0.15851	0.105471	728.225
0.172567	-0.299204	729.873
0.229378	-0.206785	730.013
0.255305	0.127628	734.558
0.249776	-0.302605	731.412
0.341568	-0.300095	732.465
0.0673667	0.168766	1.39001
0.10572	0.102571	9.73
0.120697	0.0559817	9.73
0.0872137	0.0548649	4.17
0.0209171	0.0517483	4.17
0.138139	0.00911954	1.39
0.170043	0.0844313	1.39
0.192503	0.0903187	12.51
0.225874	0.0274232	15.29
0.287168	0.0145789	9.73
0.316193	-0.104663	4.17
0.266792	-0.146875	12.51
0.223756	-0.165556	9.72999
0.110224	-0.0538079	4.17
0.136655	-0.054578	12.51
-0.070979	-0.137998	12.51
0.286399	-0.373765	9.72999
0.314499	-0.218426	15.29
0.189464	0.139794	86.95
0.160553	0.0967859	86.95
0.198193	0.0479203	84.17
0.276755	0.07728	89.73
0.241902	0.00474722	86.95
0.302342	-0.0292438	92.51
0.212206	-0.0800114	84.17
0.233697	-0.0844694	89.73
0.118437	0.173585	84.17
0.0821864	0.0394696	86.95
0.0736397	0.0648336	92.51
0.0118603	0.0404212	81.39
0.075902	-0.0950855	81.39
-0.0605508	-0.165546	92.51
-0.134993	-0.178276	89.73
-0.0508245	-0.0644053	92.51
0.227055	-0.315874	89.73
0.219007	0.130826	172.51
0.126137	0.117377	164.17
0.124327	0.0624601	161.39
0.105232	0.0450599	166.95
0.164318	0.00099354	172.51
0.203775	0.0428449	166.95
0.264759	0.0347125	166.95
0.241705	0.130508	175.29
0.171384	0.171257	161.39
0.19012	0.205656	166.95
0.243564	0.198904	169.73
0.189642	-0.258638	164.17
0.24869	-0.343079	164.17
0.277514	-0.30691	166.95
0.34516	-0.233275	169.73
-0.0867878	-0.102329	172.51
0.230559	-0.161419	161.39
0.198225	0.0720596	246.95
0.207659	0.0307353	249.73
0.226175	-0.0155177	249.73
0.276587	-0.100319	244.17
0.308053	-0.290933	249.73
0.0290353	0.0227463	244.17
0.107938	0.144023	246.95
0.149259	0.131352	241.39
0.11523	0.104249	244.17
0.120946	0.095233	241.39
0.147128	0.0669888	241.39
-0.135362	-0.15627	246.95
-0.0984474	-0.170952	252.51
0.197745	0.114041	326.951
0.173906	0.119352	324.171
0.164283	0.104045	326.951
0.135179	0.107755	332.511
0.0708807	0.136713	321.391
0.0907092	0.162452	332.511
0.1737	0.211775	332.511
0.123361	0.160929	321.391
0.0275698	0.0837668	329.731
0.0501627	0.0141648	321.391
0.0431623	-0.000989845	321.391
0.00550405	-0.0691295	329.731
0.106917	0.0528511	326.951
0.126788	0.0293616	326.951
0.12153	-0.0250835	329.731
0.282768	0.0494455	326.951
0.374818	-0.069324	326.951
0.397711	-0.143534	326.951
0.285422	-0.166627	324.171
0.248967	-0.208247	324.171
0.280558	-0.342959	324.171
0.230232	-0.191204	324.171
0.255568	-0.106547	332.511
0.12751	-0.0964504	321.391
0.217731	0.091317	329.731
-0.0182114	-0.0431852	400.784
0.12133	0.149381	398.004
0.202383	0.128617	398.004
0.204393	0.0968957	395.224
0.230455	0.0927004	398.004
0.288957	0.0247684	398.004
0.281284	0.0196893	395.224
0.314201	-0.0366132	398.004
0.195396	0.0370361	400.784
0.240241	-0.187642	395.224
0.0981239	-0.0323928	395.224
0.113654	0.0393273	395.224
0.00186339	0.0337202	395.224
0.192539	-0.31254	395.224
0.309355	0.0303767	395.224
0.187633	-0.0298671	395.224
0.216082	-0.0246581	395.224
0.0888937	0.0730494	395.224
0.0463932	0.0403079	398.004
0.0625333	0.0105877	398.004
0.0985336	0.0106386	395.224
0.219649	0.0775906	486.95
0.220652	0.0652132	489.73
0.184531	0.109989	495.29
0.0964001	0.193505	492.51
0.0637642	0.116059	486.95
0.0871997	0.0819386	484.17
0.182595	-0.225581	490.034
0.158558	-0.0844587	492.51
0.259354	-0.350662	489.76
0.0617386	0.00894787	489.73
0.0697103	0.0148052	486.95
0.131181	-0.00138027	492.51
-0.066327	0.015641	482.875
0.182645	0.0763588	575.29
0.223288	0.0313481	575.29
0.21341	0.0813652	578.07
0.162756	0.0314011	566.95
0.291475	-0.0165795	576.01
0.138515	-0.0809274	578.07
0.0960303	0.148851	575.29
0.149126	0.110463	578.07
0.156992	0.115112	578.07
0.162126	0.0539901	566.95
0.213494	-0.0340383	578.07
0.156276	-0.0266418	569.73
0.14646	0.098544	575.29
0.150982	0.0917728	566.95
0.157124	0.0936903	569.73
0.116225	0.0888991	572.51
-0.118831	-0.207032	568.623
-0.0993335	-0.0863344	649.73
-0.0575882	-0.00382574	646.95
0.0545986	-0.00868734	646.95
0.0448879	-0.0243102	652.51
0.15752	0.105442	649.73
0.0767852	0.0212089	652.51
0.208746	0.0404739	649.73
0.198337	0.0849843	658.07
0.288344	0.00534876	652.447
0.0524488	0.0393605	649.73
0.0908017	-0.0432869	649.73
-0.0978729	-0.0103016	646.95
-0.208782	-0.0292641	721.816
-0.0783566	-0.13356	721.434
0.264432	-0.338605	726.007
0.28768	-0.0806315	729.729
0.324116	-0.0629513	732.51
0.313621	0.0409145	726.949
0.276269	0.0356604	729.729
0.190479	0.0317684	724.169
0.167867	0.105287	724.169
0.115897	0.263051	727.261
0.14606	0.160461	725.329
0.192819	0.123103	729.729
0.140743	0.0799368	729.729
0.152931	0.0211718	735.289
0.0770308	0.0965368	729.729
-0.113536	0.053996	730.02
0.373789	0.0189691	1.62
0.370986	-0.0442696	1.62
0.355354	-0.0377251	1.62
0.336184	-0.129381	1.62
0.322641	-0.20072	1.62
0.305012	-0.343343	8.3487
0.21814	-0.207944	8.54027
0.315556	-0.257626	10.3179
0.299832	-0.136048	1.62
0.264914	-0.0473595	1.62
0.239532	0.0283794	1.62
0.209543	-0.0553682	1.62
0.290819	0.0349211	3.42185
0.181002	0.0204251	6.01117
0.263702	0.0881434	8.28251
0.226044	0.0344328	7.92492
0.156461	-0.00784635	8.84821
0.258105	-0.0837013	12.0344
0.217252	-0.00383135	10.3719
0.242107	0.220624	1.62
0.18342	0.122429	1.62
0.136774	0.102856	1.62
0.2559	0.232748	5.02926
0.234031	0.30899	4.50252
0.196201	0.139579	6.77707
0.187194	0.230715	8.22233
0.137338	0.238817	9.21648
0.263556	0.177096	11.9567
0.146925	0.233486	9.92066
0.119687	0.00258794	1.62
0.047277	0.0124535	8.66039
0.0574697	-0.00811808	12.9388
0.0370602	-0.00794248	11.4308
0.112916	0.0981632	1.62
-0.035751	0.162729	1.62
0.0680425	0.22178	4.65867
0.0533305	0.19982	5.77366
0.115054	0.198745	9.28197
0.0747362	0.206507	7.78438
0.0654124	0.261965	8.47286
0.039554	0.100157	7.63733
-0.0795076	-0.102118	1.62
-0.0841154	-0.116401	1.62
-0.0833414	-0.193711	1.62
-0.0977173	-0.00735429	1.62
-0.10199	-0.164625	1.62
-0.119483	-0.0215671	1.62
-0.157162	0.00989745	1.62
-0.0937123	-0.113627	8.54203
-0.0949085	-0.180433	10.5131
-0.126873	-0.172754	12.0731
-0.35489	-0.0540322	1.62
-0.235154	-0.15374	5.66144
0.337939	-0.0392122	81.62
0.340872	-0.174195	81.62
0.386519	-0.11153	85.0939
0.34103	-0.052757	92.3657
0.191839	-0.265454	81.62
0.28359	-0.345715	83.9785
0.300811	-0.042858	81.62
0.294879	-0.0221346	81.62
0.294415	-0.0661975	81.62
0.272121	0.0604263	81.62
0.264815	0.011096	81.62
0.237092	-0.0142532	81.62
0.151135	0.00860472	81.62
0.320184	-0.0422731	86.3721
0.268171	-0.197628	87.918
0.249223	0.0271363	89.1118
0.222753	-0.0686291	87.9451
0.184068	0.00904078	89.6181
0.169914	0.00213799	86.6257
0.287517	0.19465	81.62
0.213522	0.192475	81.62
0.209477	0.17496	81.62
0.199757	0.0825328	81.62
0.190955	0.155953	81.62
0.178764	0.221197	81.62
0.248069	0.104355	83.9949
0.201547	0.199698	85.3884
0.178376	0.12968	84.6412
0.253433	0.214482	89.0437
0.254135	0.151011	89.1854
0.221231	0.158453	87.7953
0.149249	0.0716299	89.155
0.134027	0.0241445	81.62
0.134208	-0.0784856	81.62
0.130654	0.0380765	81.62
0.114322	0.0172249	81.62
0.102735	0.0131575	81.62
0.0835075	0.0215244	81.62
0.0771015	0.0142427	81.62
0.0650919	0.0323968	81.62
0.063343	-0.0217491	81.62
0.0575485	0.000871857	81.62
-0.0418328	-0.128763	81.62
0.0535608	0.053516	84.9591
0.0714134	0.0416831	87.5614
0.132115	0.11583	81.62
0.0864164	0.198189	81.62
0.0858352	0.217199	81.62
0.050548	0.222422	81.62
0.128167	0.0771543	84.7416
0.0738393	0.0752999	85.5091
-0.131338	-0.190864	81.62
-0.147288	0.0471305	81.62
-0.143259	-0.130597	81.62
-0.0775866	-0.114657	84.0235
-0.071985	-0.154617	86.9997
-0.0915051	-0.0154064	88.023
-0.116795	-0.00967375	86.9707
-0.142068	-0.228262	88.0457
-0.0900974	-0.146173	91.4884
-0.178687	-0.227021	90.7858
0.373062	-0.31659	161.62
0.326029	0.0441851	166.717
0.325879	0.144582	161.62
0.269667	-0.324784	161.62
0.289627	0.00334735	161.62
0.280848	-0.0202594	161.62
0.263029	-0.108652	161.62
0.259192	0.0838184	161.62
0.244193	0.0945824	161.62
0.233909	0.0918056	161.62
0.234615	-0.0236905	161.62
0.232925	0.0457584	161.62
0.215879	0.0723441	161.62
0.201492	-0.102868	161.62
0.201158	-0.0621641	161.62
0.200725	-0.086123	161.62
0.194651	-0.0630226	161.62
0.193887	-0.0761462	161.62
0.188438	-0.120424	161.62
0.185526	0.0516896	161.62
0.182862	-0.0985878	161.62
0.151596	-0.0139701	161.62
0.124805	0.0922842	161.62
0.236113	0.0272291	163.253
0.219031	-0.155002	163.324
0.214185	0.00563572	166.044
0.144799	-0.0555152	164.455
0.188076	-0.198144	167.075
0.230482	0.208816	161.62
0.221702	0.168233	161.62
0.21913	0.135799	161.62
0.215419	0.234746	161.62
0.159193	0.159402	161.62
0.147208	0.239538	161.62
0.302054	0.213104	165.295
0.262399	0.149641	167.362
0.118875	-0.0314625	161.62
0.113115	0.0928248	161.62
0.107771	-0.0299955	161.62
0.10584	-0.12732	161.62
0.0980983	-0.0169954	161.62
0.0817735	-0.0898093	161.62
0.0748826	-0.00466476	161.62
0.0615386	-0.0290984	161.62
0.0616266	-0.087622	161.62
0.0581443	-0.171896	161.62
0.0541271	-0.00359841	161.62
0.0374234	-0.199168	161.62
0.112927	-0.00214869	163.53
0.108818	-0.0778574	165.718
0.0750937	-0.121601	165.557
0.0702358	0.080752	165.898
0.047303	-0.0220824	165.067
0.0443808	0.00473219	168.036
0.043571	-0.0089829	167.952
0.109753	0.103579	161.62
0.0857014	0.17223	161.62
0.0838295	0.256758	161.62
0.0734903	0.216876	161.62
0.0571004	0.233082	161.62
0.0535025	0.10018	161.62
0.0671866	0.234635	165.539
0.0892676	0.155006	166.649
0.0755106	0.0938923	166.877
-0.0934024	-0.268954	161.62
-0.183624	-0.224531	167.41
-0.0631431	-0.0289524	161.62
-0.0758941	0.0155042	161.62
-0.116633	-0.199464	161.62
-0.13279	-0.13253	161.62
-0.134024	-0.196418	161.62
-0.28571	0.00246453	161.62
0.362634	-0.0903382	243.511
0.312549	-0.0223328	244.333
0.317088	-0.078805	249.383
0.296033	-0.0248482	248.288
0.27968	-0.300686	242.8
0.264742	-0.294891	242.926
0.282104	0.0260471	236.751
0.271918	0.027565	236.882
0.250281	-0.173623	240.918
0.244591	-0.179336	241.112
0.229238	-0.0145413	238.316
0.189166	-0.105502	240.616
0.182987	-0.116402	240.913
0.1386	-0.163195	242.466
0.284797	-0.206916	244.889
0.268299	0.0154352	238.983
0.134451	-0.0824966	247.137
0.207728	-0.0793531	250.023
0.118552	0.0267123	249.835
0.156124	0.150985	236.446
0.155798	0.104067	245.141
0.142569	0.0950946	245.134
0.234646	0.122059	244.017
0.207875	0.208231	245.536
0.18769	0.124566	245.242
0.164929	0.123026	245.192
0.154927	0.131012	246.117
0.0389833	-0.0389365	241.73
-0.0455109	-0.0899803	248.647
0.104972	-0.068413	246.399
0.0743408	-0.0752811	251.224
0.0740438	-0.0548351	250.641
0.0333061	-0.0797048	251.407
0.0272208	0.0750483	239.833
0.0940316	0.202091	242.669
0.0828863	0.110835	244.465
0.0585063	0.156818	242.96
-0.080017	0.00994302	242.58
-0.0764024	-0.245037	247.27
-0.0928077	-0.205777	246.774
-0.119757	-0.271922	248.39
-0.125242	-0.135419	245.929
-0.178078	-0.222044	248.295
-0.267261	0.200244	250.122
0.313693	0.196398	244.536
0.304282	0.117276	329.351
0.313653	-0.0779515	332.377
0.245462	-0.27728	325.86
0.272882	0.0774424	326.02
0.202191	0.0724895	324.445
0.134092	0.0162207	325.992
0.247139	-0.0862287	329.157
0.233759	-0.153623	328.377
0.215919	0.0695263	328.906
0.180514	-0.13094	328.916
0.145119	0.0829794	328.24
0.269738	0.11854	331.03
0.217031	0.0118749	330.779
0.154223	0.250663	321.62
0.127677	0.171231	321.62
0.119829	0.174	321.62
0.257446	0.24653	325.596
0.209783	0.25999	325.608
0.195398	0.192773	325.106
0.172976	0.243034	323.631
0.172073	0.233907	324.309
0.159323	0.142541	325.764
0.142449	0.250779	323.472
0.1385	0.174934	324.331
0.27459	0.139207	328.13
0.225088	0.216703	327.669
0.19926	0.179869	329.218
0.146234	0.178608	328.849
0.124492	0.251097	327.337
0.113876	0.106269	326.566
0.261972	0.260982	330.313
0.250598	0.14236	330.695
0.224083	0.170371	331.089
0.202649	0.233789	331.237
0.194877	0.15607	330.222
0.146869	0.132172	330.265
0.133875	0.251865	330.627
0.0756443	0.0669311	326.026
0.0929077	-0.192769	329.204
0.0467886	0.0345327	328.372
-0.0618061	0.0780959	327.204
0.0332918	0.0018355	330.792
0.090699	0.183332	321.62
0.0855437	0.243688	327.273
0.0718362	0.122005	331.218
-0.0797295	-0.103371	321.62
-0.134629	-0.00982996	321.62
-0.135417	0.00800418	321.62
-0.0912697	-0.0884209	324.849
-0.0962281	-0.194069	324.28
-0.106241	-0.140754	324.319
0.30338	0.0282287	404.474
0.377792	-0.0932552	408.602
0.372411	-0.0435747	408.665
0.341975	-0.016166	407.555
0.324514	0.00614306	408.022
0.313931	0.0956717	408.67
0.309769	0.0561746	408.959
0.352387	0.146025	404.463
0.230053	-0.228876	406.169
0.266719	-0.0587843	401.62
0.25577	-0.124946	401.62
0.246685	-0.0592251	401.62
0.218003	0.0790785	401.62
0.153411	0.0546225	401.62
0.147867	0.0258433	401.62
0.133355	-0.170522	401.62
0.265354	-0.0102224	407.384
0.23176	0.0418725	407.98
0.173685	-0.0624355	406.92
0.15094	-0.0578009	407.858
0.239806	0.228448	401.62
0.211571	0.196798	401.62
0.187805	0.215359	401.62
0.182725	0.229153	401.62
0.181025	0.195572	401.62
0.183524	0.121131	401.62
0.180741	0.154514	401.62
0.156736	0.141518	401.62
0.270042	0.224809	404.206
0.233729	0.277148	404.934
0.157689	0.105471	404.662
0.254302	0.191962	407.166
0.179742	0.312639	408.963
0.0563411	0.0850034	401.62
0.0441289	0.0820045	401.62
0.114814	0.0794208	405.202
0.0320644	0.039278	404.099
0.0876444	0.0892693	407.265
0.0831227	0.140803	401.62
0.0795305	0.126068	401.62
0.0739831	0.204966	401.62
0.118654	0.146239	406.269
0.0865071	0.20962	408.866
0.063046	0.205275	408.154
-0.151305	-0.276445	407.778
-0.0480778	-0.144012	407.583
-0.193389	0.132164	401.62
-0.0754377	0.188486	406.763
0.318267	0.0771403	488.042
0.378577	0.0808836	491.35
0.31315	0.0129456	491.634
0.354273	0.134795	486.734
0.261345	-0.34676	492.686
0.249693	-0.279877	490.747
0.24715	-0.31705	492.132
0.2038	-0.313286	491.665
0.302568	-0.0657945	481.62
0.220299	0.0801353	481.62
0.184189	-0.0396541	481.62
0.256127	-0.094527	485.082
0.253263	0.061181	485.22
0.141992	-0.0749295	486.243
0.29501	-0.0528239	487.915
0.203529	-0.0433753	487.456
0.167801	-0.0743069	489.527
0.149344	-0.188403	491.556
0.261435	0.239445	481.62
0.252756	0.233229	481.62
0.231824	0.0845455	481.62
0.211529	0.130237	481.62
0.186389	0.137134	481.62
0.150341	0.2596	481.62
0.148796	0.1157	481.62
0.132476	0.237932	481.62
0.221268	0.204242	485.934
0.167673	0.194728	484.401
0.286818	0.107513	488.894
0.265507	0.200902	487.097
0.227153	0.251723	487.646
0.218986	0.190509	487.508
0.215714	0.217969	489.101
0.193968	0.202943	488.715
0.101022	0.0263285	481.62
0.0909889	0.0164125	481.62
0.0824129	-0.0155789	481.62
-0.0513633	-0.0795731	491.113
0.0767531	0.214813	481.62
0.0837861	0.192575	484.826
0.119129	0.0893076	487.554
0.0881241	0.149557	488.15
0.107937	0.271264	491.399
-0.145449	-0.24945	485.769
-0.0790759	-0.194447	481.62
-0.0899564	-0.202577	481.62
-0.0560097	-0.0619419	489.098
-0.120838	-0.207622	488.688
-0.11595	-0.0822274	491.524
-0.297123	0.00789414	481.62
0.343982	-0.0620195	494.379
0.235369	-0.239378	569.335
0.24888	-0.298167	570.526
0.285754	0.0652003	568.475
0.269242	0.0645641	568.547
0.211711	-0.0490012	568.396
0.341724	0.0687801	572.392
0.244273	-0.190843	571.781
0.2139	-0.0122158	572.305
0.19978	-0.0308746	572.318
0.172302	0.0359385	571.272
0.293385	0.275637	569.704
0.219232	0.112531	568.417
0.169124	0.107384	568.283
0.31535	0.265345	571.017
0.228611	0.148135	572.449
0.102479	0.0232357	569.298
0.1443	0.106642	568.591
0.139361	0.15299	568.444
0.0998072	0.215609	571.099
-0.164241	-0.243952	570.698
-0.210949	-0.142917	571.653
-0.246052	-0.0468871	571.286
-0.157231	0.156253	570.66
-0.266591	-0.020354	572.655
-0.286299	-0.103955	569.836
0.244408	-0.0440249	575.249
0.189074	0.0363642	572.962
0.242257	0.281948	575.144
0.214391	0.21191	575.007
0.213413	0.265011	579.351
0.179806	0.175786	578.611
0.0580622	0.020515	576.016
0.0685798	-0.0540252	577.262
0.101618	0.160582	579.294
-0.187381	-0.1787	573.278
-0.259841	-0.0130469	574.25
-0.262531	-0.0977498	574.013
0.353336	-0.0617078	651.496
0.237133	-0.30998	652.565
0.319637	-0.000492715	649.142
0.293948	0.0359534	649.697
0.206669	0.0561902	648.925
0.194583	0.051926	649.021
0.316549	0.0482205	649.868
0.24926	-0.032243	649.917
0.165555	0.0366551	650.651
0.210039	0.144988	649.357
0.241143	0.165191	650.923
0.224994	0.199805	651.172
0.170079	0.194989	651.687
0.0776349	-0.0311502	649.522
0.0637309	-0.0346683	650.968
0.156093	0.239573	652.351
0.13719	0.325442	652.529
0.100156	0.11551	651.293
-0.0114297	0.145252	651.401
-0.187775	-0.11435	648.596
-0.110203	-0.19763	651.898
-0.117139	-0.214766	649.896
-0.164249	-0.0638176	651.243
-0.23131	-0.104264	649.134
-0.219137	-0.0967755	651.493
-0.252037	-0.17721	650.218
0.271034	-0.0464216	656.097
0.27015	-0.135294	653.569
0.336096	0.0203868	656.938
0.26485	0.0423702	657.146
0.226168	-0.0163626	657.959
0.265996	0.0735306	653.919
0.293729	0.13373	656.334
0.192147	0.193847	657.261
0.165187	0.153117	656.839
0.177028	0.365615	661.06
0.0821862	0.0223131	655.722
0.0602225	-0.062894	655.679
0.0535844	0.0264693	656.851
0.149212	0.112513	654.796
0.11328	0.152398	655.2
0.0815438	0.249685	655.267
0.0936935	0.099344	656.63
-0.0804691	-0.152688	657.429
-0.215339	-0.067375	653.464
-0.237347	-0.0839784	654.688
-0.270093	-0.135072	655.296
0.387822	-0.228319	731.87
0.167483	0.0236977	729.692
0.34038	-0.0462761	730.779
0.156062	0.0514571	732.803
0.148072	-0.00182338	730.157
0.128859	0.0577167	732.812
0.140702	0.0948348	730.847
0.0901442	0.263697	731.447
-0.17399	-0.0669105	731.299
-0.130061	0.151539	730.047
-0.267881	-0.105401	731.159
0.363592	-0.125218	736.857
0.28441	-0.366524	733.825
0.232387	-0.258588	733.618
0.216186	-0.257875	733.584
0.306382	0.0218375	734.891
0.240219	-0.0140428	735.196
0.238554	-0.0622655	733.302
0.215296	0.000383215	737.11
0.207946	-0.0286786	736.266
0.158123	-0.321426	733.238
0.0512444	0.0137737	733.756
0.0294697	0.0164824	734.328
0.1226	-0.00293774	736.731
0.0674673	-0.0394884	737.353
0.108485	0.093881	733.919
-0.0176637	0.0668479	733.026
-0.0572521	-0.110532	733.657
-0.10374	-0.0521541	735.364
[truncated: 348 more rows]
