# Supplementary material for: Spinal premotor interneurons controlling antagonistic muscles are spatially intermingled
Source: eLife. 2022 Dec 13;11:e81976. doi: 10.7554/eLife.81976 (PMC9844990; doi:10.7554/eLife.81976)
Supplement: Figure 3—figure supplement 1—source data 6. [file elife-81976-fig3-figsupp1-data6.xlsx]

## Sheet: Sheet1
0.100567	0.154072	992
0.0897272	0.178885	1216
0.162045	0.0482263	1202
0.166371	0.0042484	1196
0.303281	0.111209	1228
0.16632	0.14446	1228
0.220393	0.107602	1230
0.116956	0.0940114	1228
0.206429	0.0054435	1232
0.261803	0.0403343	1232
0.319722	0.0417262	1228
0.154102	-0.00278369	1212
0.246269	-0.0585522	1200
-0.0941257	-0.208803	968
-0.047011	-0.116261	992
0.125961	0.245806	984
0.266203	0.249311	974
0.231639	0.143396	968
0.113113	0.217545	1220
0.268017	0.174215	1234
0.22747	0.186532	1234
0.221368	0.169654	1452
0.213651	-0.0166658	1448
0.229128	-0.0184374	1448
0.13651	0.0622826	1708
0.180039	0.0540431	1708
0.104632	0.120114	1708
0.224596	0.119031	1926
0.148246	0.0204022	1936
0.246631	-0.0290734	1948
0.227804	-0.0358118	1916
0.100524	0.12472	1926
-0.167102	-0.139281	966
-0.129876	-0.124499	976
-0.246151	-0.125081	988
0.266351	-0.174808	964
0.374804	-0.0209626	986
0.342297	0.00530683	966
0.247864	0.109518	974
0.191103	0.140234	978
0.327203	0.0172704	994
0.28882	-0.00442677	982
0.28478	-0.0264283	980
0.226144	0.279092	994
0.114949	0.27455	1210
0.125787	0.0585311	1212
0.20032	0.0787162	1218
0.11541	0.21133	1222
0.150304	0.129606	1222
-0.0432682	0.125778	1230
0.0186484	0.163979	1232
0.142585	0.125929	1232
0.212603	0.145963	1230
0.178377	0.100189	1234
0.186454	0.230799	1228
0.143908	0.16462	1228
0.226166	0.136084	1210
0.335101	-0.0284326	1202
0.364788	-0.0587033	1206
0.290182	-0.0592815	1206
0.239049	-0.0142232	1206
0.211929	-0.116436	1210
0.168886	-0.0250386	1210
0.281438	0.0603004	1216
0.287142	0.0415749	1218
0.326733	-0.0392066	1222
0.162447	-0.111403	1226
0.355868	-0.100134	1228
0.279217	0.0387178	1224
0.164353	-0.0253208	1232
0.28835	0.07873	1210
0.3577	-0.122171	1216
-0.205357	-0.111211	1230
-0.252236	-0.020426	1230
-0.25436	-0.00892218	1228
-0.173686	-0.0906469	1230
-0.257261	-0.162548	1226
-0.220656	-0.130074	1224
-0.0837268	-0.0836936	1226
-0.149819	-0.0361362	1212
-0.0759531	-0.142583	1210
-0.208807	-0.0100786	1460
-0.170262	-0.151788	1464
0.356823	-0.0225937	1468
0.199344	0.185235	1710
0.160169	0.18095	1702
-0.185041	0.247317	1698
0.296692	-0.190157	1702
0.225112	-0.00335543	1698
-0.200253	-0.128719	1692
0.0995922	0.150514	810
0.234532	0.0711335	810
0.217132	0.117534	812
0.243688	0.168473	812
0.305178	0.142075	812
0.183527	0.0299073	812
0.34028	0.101448	812
0.320054	0.188209	802
0.206374	0.0794839	802
0.167104	0.0555432	802
0.163395	0.0521527	802
0.193666	-0.0234595	808
0.336627	0.0452459	1300
0.217305	-0.058608	1300
0.265171	-0.0146575	1300
0.142297	-0.0107563	1300
0.239146	0.000903142	1300
0.213239	-0.206153	1316
0.259105	-0.123531	1312
0.265847	-0.094023	1310
0.290699	-0.0923351	1308
0.282834	-0.0953629	1306
0.178667	-0.163402	1296
0.230159	-0.119044	1306
0.20739	-0.0313213	1310
0.284052	-0.238119	1304
0.299168	-0.042877	1302
0.292861	0.0367771	1300
0.344984	0.0587782	1334
0.299994	0.0414853	1332
0.201	-0.2197	1780
0.235041	-0.0498283	1780
0.275824	-0.0582378	1780
0.300458	-0.304684	1774
-0.111105	-0.0429093	805.917
-0.0513856	-0.0335684	811.246
0.0452182	0.0547999	815.996
0.144766	0.0735031	817.192
0.284231	-0.0474045	806.456
0.342072	0.0210581	813.601
0.140227	0.195684	827.159
0.237977	0.201488	836.564
0.222072	0.258848	838.804
0.417382	0.184014	832.523
0.242513	0.351072	854.627
0.230751	0.344029	853.9
-0.174475	-0.15926	862.058
-0.162982	-0.295326	862.92
0.117923	0.194942	862.934
0.0782832	0.212623	862.424
0.175751	0.0218222	864.634
0.336615	0.0365308	866.142
0.355606	-0.0549054	866.869
0.384061	-0.109931	867.453
0.319113	-0.145721	867.002
0.231929	0.177993	864.18
0.221324	0.274153	863.451
0.193042	-0.137266	865.699
0.125963	0.171487	1238
0.120898	0.105522	1224
0.0812421	0.216583	1240
0.117887	0.069966	1234
0.125369	0.0915175	1230
0.189438	0.0539465	1724
0.233337	0.042918	1724
0.279535	0.00402267	1724
0.198412	0.0251755	1736
0.140395	-0.0419853	1730
0.229589	0.0322739	2690
0.281425	-0.116031	2662
0.351054	-0.0731699	2662
0.336499	0.0693394	2684
0.32616	-0.0139819	1250
0.317928	-0.0133319	1244
0.228351	0.0204489	1236
0.236908	-0.0332568	1232
0.250834	-0.0793083	1230
0.232237	-0.0145391	1220
0.31543	0.00470265	1252
0.294725	-0.17754	1248
0.128409	0.0379927	1244
0.261558	-0.218809	1238
0.141962	-0.165196	1236
-0.307615	-0.0539005	1234
-0.331656	-0.19264	1232
-0.275412	-0.19697	1228
-0.173771	-0.186111	1218
-0.140844	-0.0265473	1228
-0.103962	-0.140222	1228
0.287901	0.0442773	1238
0.0938876	0.08152	1240
0.262602	0.268649	1254
0.143605	0.157522	1244
0.384015	0.23353	1248
0.221878	0.182116	1252
0.307137	0.210527	1226
0.243743	0.149988	1220
0.026003	0.157406	1720
-0.143051	0.0873253	1704
-0.120928	0.0662214	1676
-0.228657	0.180402	810.644
0.0954503	0.155024	801.39
0.10784	0.180857	801.39
0.156864	-0.0158765	801.39
0.162142	-0.0392596	801.39
0.1451	-0.0186277	803.347
0.155128	0.060542	806.793
0.248492	0.140379	807.021
0.285415	-0.0359913	801.39
0.323596	0.0463232	801.39
0.271654	-0.0196539	807.015
0.313263	0.0127735	807.947
0.207946	-0.21338	801.39
0.229904	-0.221585	801.39
0.221435	-0.297805	803.93
-0.300439	0.213929	881.39
0.194838	0.206792	881.39
0.201956	0.106326	881.39
0.222677	0.158609	881.39
0.227156	0.136008	881.39
0.129163	0.188958	883.825
0.164849	0.20914	886.738
0.0834602	0.129685	889.028
0.0341393	0.00808371	881.39
0.0595095	0.0300057	881.39
0.132934	0.058926	881.39
0.252074	0.158309	886.419
0.289584	0.235149	889.194
0.248065	-0.147887	881.39
0.256759	-0.0938676	881.39
0.286965	0.0584396	881.39
-0.152915	-0.0742518	892.88
-0.162898	-0.217444	967.605
0.107358	0.189482	967.934
0.107455	0.0222209	964.069
0.187344	0.242719	968.233
0.196856	0.168607	968.19
0.192275	0.189329	970.257
0.198958	0.202623	969.604
0.236602	-0.127902	961.39
0.203204	0.0750275	967.476
0.277211	0.102169	966.901
0.241507	-0.238681	961.39
0.218408	-0.19724	965.49
0.351107	0.00125149	970.981
-0.134227	-0.272567	975.161
0.175486	0.179307	971.577
-0.218788	-0.190362	1050.47
0.074623	0.184976	1041.39
0.110438	0.198698	1041.39
0.126717	0.0502499	1041.39
0.138838	0.0180228	1041.39
0.156625	-0.00665267	1041.39
0.186579	-0.106088	1041.39
0.22656	-0.01985	1041.39
0.233154	-0.123311	1041.39
0.307467	-0.108669	1041.39
0.222614	0.0555468	1048.66
-0.126315	-0.16174	1051.82
0.247454	-0.267874	1051.58
0.0718821	0.151454	1121.39
0.0997933	0.168181	1121.39
0.176073	0.216802	1121.39
0.194533	0.188769	1121.39
0.168828	0.154955	1125.51
0.2015	0.223492	1123.2
0.175094	0.189857	1126.48
0.182754	0.0545865	1121.39
0.189501	0.0733714	1125.32
0.20118	0.0999373	1121.39
0.204215	0.131401	1121.39
0.268369	0.190579	1121.39
0.284538	0.105254	1121.39
0.269532	0.128787	1130.28
0.21109	0.019738	1121.39
0.21273	-0.022664	1121.39
0.267046	0.0241607	1121.39
0.355997	-0.143337	1121.39
0.199867	0.067446	1124.6
0.281495	-0.266113	1121.39
0.25731	-0.237261	1128.22
0.249194	-0.284513	1129.65
-0.175202	-0.221175	1209.19
0.141844	0.159529	1201.39
0.160115	0.25119	1209.66
0.124043	0.0210871	1201.39
0.129711	-0.0566356	1201.39
0.0609245	-0.00163304	1204.53
0.0722317	-0.00034532	1203.22
0.171374	-0.0686625	1203.09
0.096875	-0.0732597	1205.59
0.123054	0.0505417	1206.44
0.143158	-0.0519275	1205.97
0.0465002	-0.105454	1209.98
0.111322	0.0376954	1209.65
0.154537	-0.0493905	1209.57
0.160543	-0.0319591	1209.57
0.208171	0.0143403	1201.39
0.231572	0.00807822	1205.41
0.257798	-0.0652722	1207.78
0.354794	-0.193742	1208.85
0.169611	0.108294	1218.07
0.271837	0.0394185	1212.63
0.292579	0.0331631	1212.01
0.307348	-0.00656012	1214.84
0.30063	-0.2694	1211.75
-0.0163219	0.0115255	1290.4
-0.172913	-0.162257	1284.53
-0.139616	-0.179247	1288.35
0.0896157	0.139723	1281.39
0.0969521	0.171333	1281.39
0.10263	0.110916	1287.34
0.205916	0.198985	1290.54
0.0349424	0.0156132	1281.39
0.0498496	-0.00310487	1281.39
0.0612128	0.0157673	1281.39
0.075271	-0.00108805	1281.39
0.079101	-0.0492933	1281.39
0.101532	-0.0175102	1281.39
0.125074	-0.047683	1281.39
0.134216	-0.045313	1281.39
0.181388	-0.00649325	1281.39
0.179948	-0.0437524	1281.39
0.15036	-0.113279	1284.97
0.0349985	-0.0498579	1287.05
0.137211	-0.0901388	1286
0.184164	0.0211068	1288.71
0.0960123	-0.189372	1285.22
0.114336	-0.15211	1289.4
0.237908	0.113127	1281.39
0.199072	-0.119066	1281.39
0.297852	0.0236138	1290.98
0.282497	-0.21929	1287.32
0.0279755	0.0467452	1293
0.109108	-0.199788	1292.49
0.076065	0.18992	1365.13
0.13819	0.190306	1364.89
0.152557	0.18744	1365.04
0.040544	0.0143393	1361.39
0.0660539	0.00848214	1361.39
0.138722	0.0851796	1361.39
0.0612268	-0.00606256	1364.05
0.245277	0.119373	1367.91
0.216071	-0.280607	1365.08
0.23223	-0.331178	1368.54
0.0875944	0.188056	1378.07
0.1013	0.00561149	1372.4
0.147575	0.00670583	1375.47
0.302779	0.0398157	1374.17
-0.0702047	-0.0465909	1451.11
0.153858	0.162036	1443.86
0.175111	0.220185	1444.54
0.112313	0.0638187	1444.18
0.0300195	0.00370787	1447.88
0.0557864	0.0230312	1448.73
0.192736	0.223546	1444.99
0.206256	0.111028	1450.33
0.213945	0.20468	1450.57
0.293115	-0.126693	1445.65
0.212854	0.0507487	1449.66
0.254823	-0.279234	1456.03
0.363641	-0.19124	1458.07
-0.0644243	0.00740626	1521.39
-0.0820677	-0.0914649	1529.44
-0.15262	-0.180513	1521.39
0.0445927	-0.0405419	1521.39
0.0464469	-0.0173026	1521.39
0.196385	0.106916	1521.39
0.0633947	0.0109829	1523.48
0.0883764	0.0837039	1523.08
0.127347	0.0879535	1523.54
0.0844388	0.0355566	1530.42
0.103052	0.080089	1530.91
0.131806	0.0313146	1528.72
0.287829	-0.345356	1527.78
0.381459	-0.207512	1529.39
-0.127644	-0.199664	1535.39
0.119434	0.075303	1531.15
0.230257	0.216315	1538.07
0.221648	-0.0179003	1534.96
0.296368	0.12353	1534.55
0.289272	-0.138787	1532.46
-0.272084	-0.245011	1601.39
-0.112358	-0.125466	1601.39
-0.134316	-0.150985	1606.58
0.0797496	0.167967	1601.39
0.050299	0.0223056	1601.39
0.0658263	0.0267178	1601.39
0.156502	0.110932	1601.39
0.167358	0.124461	1601.39
0.191456	0.124245	1601.39
0.213177	0.131584	1605.29
0.197941	0.0637738	1607.46
0.233985	0.163641	1607.27
0.239443	0.147541	1606.89
0.27905	0.0782848	1606.42
0.225491	-0.329952	1601.39
0.28012	-0.190199	1609.44
0.324138	-0.371842	1610.58
0.385649	-0.186602	1605.04
0.284381	0.0211246	1611.6
0.297608	-0.0371828	1613.16
0.302858	-0.2764	1611.64
-0.176423	-0.225579	1681.39
0.138005	0.161902	1681.39
0.045137	0.0275163	1681.39
0.0647038	-0.0430132	1681.39
0.109647	-0.0397256	1681.39
0.124655	-0.046858	1681.39
0.172651	-0.0308357	1685.23
0.0652158	0.0941953	1688.41
0.180721	0.148679	1689.87
0.277557	-0.0528063	1681.39
0.309588	-0.00634602	1681.39
0.27422	0.0117452	1686.94
0.238469	0.128223	1690.86
0.353766	-0.0143488	1690.75
0.229135	0.0534154	1691.71
0.317324	-0.158243	1698.07
-0.164906	-0.224055	1761.39
0.0388846	0.027921	1761.39
0.191717	0.199876	1761.39
0.0577505	0.0202579	1761.39
0.133515	0.0249331	1761.39
0.158039	0.105477	1761.39
0.170956	0.126563	1761.39
0.171857	0.0965585	1761.39
0.222671	0.136815	1761.39
0.245555	0.100977	1761.39
0.340094	-0.00131681	1763.05
0.317734	-0.130979	1761.39
0.129797	0.0711816	1841.39
0.14391	0.0613914	1841.39
0.11703	-0.0886757	1850.2
0.387605	0.0271731	1850.62
0.32171	-0.154047	1846.12
0.304448	-0.339117	1841.39
0.311809	-0.389506	1841.39
0.348785	-0.394206	1841.39
0.313109	-0.311974	1845.07
0.353568	-0.329524	1844.3
-0.232132	-0.117834	1921.39
-0.134721	-0.0497347	1921.39
-0.0729846	-0.026078	1928.87
0.191807	0.180655	1921.39
0.139616	0.0774121	1921.39
0.162327	0.012055	1921.39
0.174709	0.108748	1921.39
0.102436	0.157642	1929.83
0.283971	0.00718659	1929.21
0.297598	-0.148694	1921.39
0.336327	-0.375173	1930.84
0.427306	-0.130063	1929.56
0.337354	0.0141798	1931.22
0.339429	-0.0368345	1932.17
0.199581	-0.0235628	812.51
0.11015	-0.0321121	809.73
0.0398808	-0.0196799	804.17
0.00573736	-0.0245935	801.39
-0.0822682	-0.0740909	815.29
0.0719439	0.187205	809.73
0.118334	0.212173	806.95
0.164141	0.126196	815.29
0.226721	0.147399	809.73
0.224004	0.198784	804.17
0.214672	0.134305	806.95
0.223469	0.120014	806.95
0.174432	0.0726688	804.17
0.11323	0.0055527	806.95
0.102132	0.0347644	804.17
0.304756	-0.022386	809.73
0.285389	0.0390148	801.39
0.268377	-0.338202	813.339
-0.0197129	-0.0829663	812.51
-0.134569	-0.187487	806.95
0.222893	-0.165332	881.39
0.146265	-0.136359	889.73
0.182016	-0.268208	889.512
0.176776	-0.0870457	889.73
0.145705	-0.0521464	886.95
0.141776	-0.000389715	884.17
0.159714	0.0673005	881.39
0.171696	0.0721066	884.17
0.146921	0.0918264	886.95
0.199718	0.148858	892.51
0.0525125	0.0983631	881.39
-0.105994	-0.168956	887.764
0.310295	-0.0780197	967.631
0.25848	-0.147101	964.17
0.24659	-0.147623	961.39
0.126753	0.152812	964.17
0.0727869	0.159834	969.73
0.104597	0.088745	961.39
0.136898	0.0840169	961.39
0.187949	0.138741	964.17
0.148173	0.123208	961.39
0.239479	-0.145461	1049.73
0.27618	0.0797154	1049.73
0.294399	0.0559606	1048.6
0.308447	0.0369177	1043.26
0.30488	0.120674	1046.66
0.19839	0.153285	1044.17
0.192197	0.0367314	1041.39
0.15643	0.0664226	1044.17
0.127514	0.0564138	1044.17
0.143348	0.0773141	1041.39
0.0561293	0.029881	1044.17
0.113507	0.0629655	1049.73
0.165471	0.0369235	1041.39
0.0561164	-0.0260054	1044.17
0.300895	-0.0362884	1135.29
0.261434	-0.153056	1129.73
0.267691	-0.351079	1134.12
0.0570786	0.0177581	1129.73
0.10696	0.107443	1124.17
0.193795	0.167678	1126.95
0.275694	0.025891	1132.51
-0.13505	-0.180341	1132.4
-0.129984	-0.208247	1131.53
0.028655	0.00787624	1124.17
0.234814	-0.0381976	1124.17
0.137855	0.0257017	1124.17
0.115534	0.135565	1124.17
0.23191	0.111922	1201.39
0.174542	0.118246	1212.51
0.16077	0.110776	1204.17
0.16694	0.171573	1209.73
0.138931	-0.112916	1209.73
0.239927	-0.306507	1216.55
-0.0647489	-0.179913	1206.95
-0.0612941	-0.117166	1209.73
-0.226272	-0.0387123	1215.92
0.155084	-0.0783408	1286.95
0.238255	-0.156523	1281.39
0.202568	-0.0114492	1289.73
0.197933	0.0245472	1289.73
0.173178	0.173593	1284.17
0.0672894	0.00701342	1289.73
0.164439	0.16592	1289.73
0.331665	-0.176823	1287.48
0.179862	0.173642	1364.17
0.161534	0.117975	1366.95
0.141218	0.145502	1361.39
0.0877386	0.114213	1361.39
0.0767421	0.193336	1364.17
0.170589	0.0865579	1364.17
-0.251059	0.0249474	1361.39
-0.0774441	-0.192714	1366.95
0.125979	0.00136463	1369.73
0.241949	0.202765	1449.54
0.201721	0.113891	1446.95
0.177613	0.0743987	1446.95
0.145105	0.0138043	1444.17
0.107852	0.108264	1446.95
0.197555	-0.166299	1446.95
-0.0963067	0.0212428	1446.95
-0.157389	-0.217961	1453.56
-0.106311	-0.120843	1451.26
-0.174642	0.079313	1451.42
-0.119597	0.212417	1442.1
0.197802	-0.000782305	1449.74
-0.130609	-0.037221	1528.81
-0.18775	0.170612	1530.28
-0.227928	0.0898512	1527.83
0.129576	-0.00520948	1524.17
0.189353	0.0498588	1529.73
0.235479	-0.136816	1529.73
0.294145	-0.120891	1532.51
0.235591	0.12727	1532.51
0.142149	0.116895	1526.95
0.142933	0.0765978	1529.73
0.209294	0.139363	1526.95
-0.159843	0.2601	1608.35
0.00253525	-0.0475848	1601.39
-0.12161	-0.210243	1606.95
-0.182647	-0.112135	1612.51
0.179435	-0.0702639	1601.39
0.168891	0.0715208	1601.39
0.220176	0.0740488	1604.17
0.239862	0.101111	1694.56
0.193956	-0.0123241	1686.95
0.162585	-0.015176	1689.73
0.130464	0.0282208	1684.17
0.0844337	0.139805	1686.95
0.32938	-0.148364	1688.3
0.0775872	0.0400518	1684.17
0.0505842	0.00629447	1686.95
0.168809	0.0925128	1763.36
0.248141	0.14226	1767.34
0.136906	0.0669217	1761.92
0.114804	0.0434274	1772.99
0.117192	0.0236379	1769.73
0.23043	-0.10916	1772.51
0.266443	-0.17434	1769.73
0.297866	-0.156402	1772.51
0.0300666	0.0130792	1764.17
-0.141416	0.222321	1841.96
0.0769092	0.1498	1841.7
-0.13947	-0.221002	1843.63
0.200659	-0.116458	1841.39
0.252369	0.153174	1847.06
0.271849	-0.33534	804.375
0.257104	-0.308083	807.523
0.218266	-0.216141	807.757
0.341626	-0.0490883	809.493
0.329068	0.0277068	807.83
0.249303	-0.198328	808.842
0.215348	-0.116426	808.436
0.209424	0.0385421	807.468
0.292378	-0.0935972	810.89
0.209056	0.0240473	811.37
0.186255	0.187353	801.62
0.151683	0.251908	805.649
0.149186	0.296462	806.171
0.233365	0.0978882	807.287
0.202176	0.196598	807.943
0.252963	0.221231	811.819
0.215776	0.105734	810.757
0.122313	0.0128275	801.62
-0.0353728	-0.137039	801.62
0.138972	-0.0963477	805.41
0.120543	0.0758093	806.497
0.0568806	0.0400328	807.209
0.0439631	0.00757279	808.18
0.0328373	-0.13378	806.713
0.0980017	0.152614	805.937
0.11336	0.203092	807.713
0.0822451	0.183605	806.632
0.0705791	0.153957	808.756
0.0672402	0.260641	807.704
0.129079	0.313914	810.205
0.0392291	0.22342	810.479
-0.172824	-0.254971	805.77
-0.0897346	-0.202489	805.87
-0.0959571	0.0460999	807.055
-0.199182	-0.139423	807.504
-0.107418	0.0484129	810.895
-0.183787	-0.118748	812.398
-0.197149	-0.113373	812.208
-0.200658	0.13009	808.619
-0.144339	0.102199	810.069
-0.201257	0.109607	809.811
0.336344	0.0365524	889.241
0.25929	-0.308788	889.129
0.259837	0.0345264	881.265
0.252246	-0.190168	885.906
0.23372	0.0343952	884.404
0.169126	-0.00280042	889.141
0.334737	-0.152345	892.078
0.171884	0.172743	881
0.184133	0.136717	884.323
0.226029	0.120371	887.624
0.274478	0.118907	890.226
0.197192	0.148747	889.408
0.191994	0.219579	889.226
0.158372	0.264969	891.737
0.179202	0.364603	880.499
0.166363	0.360559	884.822
0.11132	0.23488	880.902
0.122225	0.237738	884.618
0.119659	0.213139	884.57
0.146952	0.212192	888.879
0.141898	0.148041	886.827
-0.137293	-0.147928	890.643
-0.189137	-0.180638	892.148
0.393994	-0.118473	897.703
0.313815	-0.116306	894.823
0.237785	-0.0630829	894.792
0.191799	0.179177	892.349
0.199927	0.188495	897.13
0.0959006	0.00684241	894.39
0.0414224	-0.0676788	897.942
0.148897	0.248369	897.029
-0.165543	-0.226251	898.551
0.375481	-0.130504	964.94
0.268217	-0.341272	961.62
0.344851	0.0140999	961.62
0.298372	-0.0952171	961.62
0.213653	-0.0272843	965.431
0.332472	0.0708148	966.837
0.287506	0.0265045	969.049
0.234905	-0.071692	969.074
0.208424	-0.0909017	968.508
0.2714	0.0201126	969.867
0.217301	0.150588	961.62
0.214698	0.238701	961.62
0.203924	0.286931	961.62
0.187084	0.0921255	961.62
0.192236	0.195386	968.006
0.214498	0.282961	971.364
0.188271	0.1185	970.824
0.16327	-0.00579922	961.62
0.0860369	-0.00527558	961.62
0.177823	0.0561616	964.984
0.0758923	0.0610989	968.46
0.105527	0.13609	961.62
0.142582	0.20987	969.583
0.0891942	0.177641	967.406
0.084777	0.240654	971.641
-0.0852141	-0.221439	961.62
-0.0660478	-0.20328	961.62
-0.120963	-0.128233	961.62
-0.109283	-0.188129	968.806
-0.133708	-0.219312	968.135
0.000602718	-0.130422	972.856
-0.23509	0.1869	970.136
0.174983	-0.217223	1041.62
0.308406	0.0876073	1041.62
0.298014	0.0867156	1041.62
0.239686	0.0113906	1041.62
0.16876	-0.199098	1041.62
0.340617	0.0334239	1044.89
0.330034	-0.089126	1043.74
0.280943	0.0545378	1046.04
0.25275	0.05083	1048.63
0.338406	0.013858	1051.59
0.327932	0.165398	1041.62
0.264081	0.116119	1041.62
0.190052	0.133201	1041.62
0.176062	0.268639	1041.62
0.17403	0.123545	1041.62
0.153384	0.209573	1041.62
0.283458	0.1357	1045.81
0.206255	0.222563	1044.88
0.328494	0.147569	1048.59
0.268673	0.201958	1047.39
0.157178	0.129318	1046.6
0.24895	0.187153	1052.57
0.151675	-0.175166	1045.94
0.0396017	0.0654415	1044.34
0.0820095	0.0513416	1050.45
0.0692744	0.31998	1045.56
-0.0890762	0.056842	1041.62
-0.0953567	-0.15636	1041.62
-0.258101	-0.0500608	1049.56
0.173029	0.139825	1054
0.155953	0.268241	1054.96
0.130259	0.340221	1053.74
0.0479665	0.124516	1055.72
0.34562	-0.245281	1121.62
0.370325	-0.256829	1129.07
0.32343	0.0870875	1121.62
0.32555	0.0255768	1121.62
0.284192	-0.0336835	1121.62
0.252067	-0.0339522	1121.62
0.248873	-0.0531217	1121.62
0.227678	0.0734205	1121.62
0.343925	-0.0156938	1125.07
0.344629	-0.0479654	1124.17
0.326146	-0.0646101	1124.24
0.216058	0.0494675	1124.06
0.214738	0.0613614	1123.39
0.326175	-0.150572	1127.59
0.298058	-0.206214	1128.2
0.228754	-0.104146	1127.97
0.261768	0.234081	1121.62
0.219898	0.137201	1121.62
0.19653	0.131557	1121.62
0.173478	0.120063	1121.62
0.253368	0.143623	1126.38
0.294344	0.132949	1129.01
0.320969	0.160047	1130.65
0.158135	-0.0421434	1130.63
0.0881392	0.0544179	1130.65
0.163104	0.0983052	1121.62
0.137883	0.172425	1121.62
0.0533522	0.116401	1121.62
0.145429	0.104817	1125.18
0.097904	0.0903826	1124.89
0.0319362	0.125317	1124.78
0.150812	0.18997	1129.96
0.0707383	0.239194	1131.46
-0.107247	-0.190368	1121.62
-0.129168	-0.240829	1121.62
-0.03313	-0.12349	1132.88
-0.105169	-0.109293	1130.97
-0.0270055	0.0931336	1123.3
-0.197042	-0.147486	1121.62
-0.217883	-0.161665	1121.62
-0.221745	0.178422	1126.95
-0.335188	0.0945664	1130.56
0.0386755	0.0818081	1133.39
0.380461	-0.0606983	1209.16
0.208327	-0.328679	1205.35
0.303735	0.0167181	1201.62
0.3053	-0.0947998	1201.62
0.29636	-0.0260758	1201.62
0.291836	0.0442099	1201.62
0.27904	0.0456817	1201.62
0.270708	-0.189014	1201.62
0.265042	0.0223968	1201.62
0.251695	0.0644089	1201.62
0.237001	-0.0160684	1201.62
0.186383	-0.0423803	1201.62
0.178556	-0.0212015	1201.62
0.243164	-0.0204707	1205.45
0.335871	-0.13821	1207.81
0.297892	-0.151444	1206.93
0.267677	-0.16475	1207.14
0.160364	-0.0687975	1207.87
0.303907	0.0979143	1201.62
0.256262	0.0824946	1201.62
0.253878	0.143871	1201.62
0.206052	0.131225	1201.62
0.156021	0.0799248	1201.62
0.184001	0.158983	1207.62
0.177192	0.237405	1209.19
0.156688	0.166632	1208.22
0.059274	-0.0920297	1201.62
0.0594067	-0.0465981	1207.48
0.0661654	0.0691827	1209.89
0.13667	0.247444	1201.62
0.120417	0.221367	1201.62
0.0862307	0.201907	1205.89
0.142918	0.21621	1209.14
-0.133589	-0.333744	1201.62
-0.0896814	-0.254514	1206.21
-0.165582	-0.251222	1211.77
-0.099884	-0.193756	1201.62
-0.141715	-0.166015	1201.62
-0.161523	-0.204147	1201.62
-0.0632631	-0.173743	1204.94
-0.137518	-0.155447	1209.34
-0.199448	-0.145425	1209.08
-0.172473	-0.217021	1212.01
-0.230995	0.0208789	1209.72
0.370795	-0.236379	1281.62
0.347569	0.026839	1281.62
0.334434	-0.0681078	1281.62
0.328945	0.00467257	1287.13
0.150261	-0.269576	1288.61
0.323827	-0.16309	1281.62
0.292043	-0.120486	1281.62
0.271664	0.000184369	1281.62
0.152077	0.0137628	1281.62
0.301663	-0.149105	1283.77
0.322023	0.0386121	1287.35
0.272834	0.0496975	1288.01
0.253709	0.0261301	1287.4
0.197783	-0.0602472	1288.57
0.184474	-0.00766454	1287.83
0.18276	0.02938	1289.87
0.183058	-0.0217979	1289.8
0.162676	-0.0464847	1290.31
0.291426	0.162033	1281.62
0.276536	0.168652	1281.62
0.244443	0.228938	1281.62
0.22684	0.165257	1281.62
0.218808	0.164279	1281.62
0.212481	0.216575	1281.62
0.159169	0.230761	1281.62
0.26236	0.166782	1285.32
0.245871	0.217065	1284.51
0.207674	0.108342	1284.37
0.169771	0.124233	1285.55
0.0102041	-0.0588947	1281.62
0.0975963	0.0689912	1283.25
0.0865646	0.0447326	1285.26
0.0449714	-0.014724	1285.97
0.138213	0.00992585	1287.06
0.129798	0.166417	1281.62
0.0904547	0.11952	1285.11
0.0710572	0.218156	1284.75
0.12912	0.0979835	1286.56
-0.116343	-0.219651	1281.62
-0.0473895	0.0207873	1284.42
-0.122588	-0.170862	1284.85
-0.143939	-0.194401	1285.43
-0.152607	-0.204135	1284.14
-0.187149	-0.019152	1285.15
-0.198979	-0.0531228	1286.58
-0.186622	-0.216308	1292.75
-0.260945	0.196782	1286.34
0.367835	-0.0737848	1364.36
0.364143	0.00129645	1368.8
0.222575	-0.32125	1368.57
0.350807	-0.105268	1364.75
0.21942	-0.133261	1365.79
0.35209	-0.00545597	1368.87
0.345801	0.029753	1366.63
0.336677	-0.05462	1366.8
0.319882	-0.0167106	1367.62
0.298893	0.0564622	1367.55
0.25167	0.0605917	1367.53
0.198585	-0.0555965	1367.62
0.183098	0.0549274	1369.11
0.242251	-0.197478	1371.01
0.200341	-0.0972741	1370.74
0.306249	0.188438	1365.25
0.296227	0.21769	1364.39
0.29312	0.309066	1367.79
0.285067	0.116337	1369.23
0.209972	0.186112	1367.9
0.178123	0.105355	1367.88
0.121677	0.0417846	1367.8
0.17964	-0.0689294	1369.73
0.150715	0.089265	1366.22
0.173981	0.0916112	1368.44
0.138838	0.2345	1366.61
0.109945	0.269269	1367.83
0.068733	0.0656903	1368.45
0.167282	0.142346	1370.14
0.130721	0.126923	1372.05
0.116558	0.155089	1371.77
0.0848494	0.244383	1370.38
-0.110961	-0.175666	1369.63
-0.0884961	-0.150847	1370.65
-0.119598	-0.105933	1372.27
-0.138305	-0.185981	1370.76
-0.14161	-0.217758	1370.77
-0.14596	-0.159446	1369.87
-0.156084	-0.216015	1370.74
-0.16743	-0.0824376	1370.7
-0.171598	-0.165557	1372.4
-0.171051	0.186981	1369.5
-0.206739	0.194524	1371.04
-0.214905	0.21222	1372.52
-0.307383	-0.108041	1377.82
-0.210718	0.227323	1374.53
-0.212464	0.166227	1375.5
-0.470613	0.0613665	809.225
-0.122923	0.173547	801.62
-0.136539	0.091985	808.1
-0.154962	-0.0807949	801.62
-0.10431	-0.158697	804.86
-0.0717126	-0.137904	811.34
-0.0564934	-0.107059	814.58
-0.126518	-0.237533	801.62
-0.144532	-0.221328	811.34
-0.206769	-0.382717	801.942
-0.208432	-0.335828	808.351
-0.0199062	0.109847	801.62
0.134297	0.193263	804.86
0.188759	0.194519	801.62
0.213409	0.184175	801.62
0.22404	0.173758	804.86
0.22357	0.0374847	801.62
0.315696	0.0391704	803.815
0.231507	-0.0226305	801.62
0.133527	0.04355	801.62
0.0919561	0.0173777	808.1
0.226821	-0.117104	811.34
0.268959	-0.0444786	803.229
0.336362	-0.163538	808.941
0.364066	-0.273428	809.446
-0.190178	0.0369325	888.1
-0.14917	-0.205699	892.001
-0.138768	-0.173514	890.588
-0.123818	-0.216931	893.185
0.328652	-0.152806	881.635
0.379462	-0.230226	884.486
0.383002	-0.313986	882.698
0.255905	-0.313415	882.794
0.222051	-0.198194	881.909
0.36906	-0.0149308	882.971
0.285091	0.173277	892.148
0.205434	0.178611	890.232
0.0927142	0.102773	884.86
0.328858	0.0375877	886.978
0.179763	-0.0436994	883.781
0.302526	-0.027088	883.047
0.257112	0.0128569	888.905
