# Supplementary material for: Spinal premotor interneurons controlling antagonistic muscles are spatially intermingled
Source: eLife. 2022 Dec 13;11:e81976. doi: 10.7554/eLife.81976 (PMC9844990; doi:10.7554/eLife.81976)
Supplement: Figure 3—figure supplement 1—source data 7. [file elife-81976-fig3-figsupp1-data7.xlsx]

## Sheet: Sheet1
-0.222301	-0.101581	-5010
0.0966811	0.14634	-5024
-0.276732	-0.278585	-5028
-0.193537	0.228426	-4780
0.0380152	0.218401	-4786
0.243638	0.193188	-4794
0.110255	0.0127359	-4802
-0.216095	-0.00010787	-4768
-0.17124	-0.198201	-4792
0.199663	0.18952	-4534
0.186044	0.0961651	-4540
0.28634	-0.0477829	-4562
-0.113326	-0.0724072	-4558
-0.204677	-0.245271	-4556
-0.210078	-0.230113	-4560
-0.189396	0.214454	-4306
0.0949435	0.115639	-4290
0.238217	0.137872	-4294
0.199409	0.0153667	-4296
0.196329	-0.0634942	-4298
0.258028	-0.151618	-4310
0.217365	0.104734	-4322
0.162141	-0.0101064	-4320
0.183786	0.227823	-4304
-0.03614	-0.0964704	-4064
0.135235	0.101829	-4072
0.152756	0.0223605	-4074
0.283138	-0.0601578	-4080
-0.134246	-0.078185	-4084
0.193738	0.0103169	-3810
0.146041	0.177888	-3812
0.164846	0.144609	-3818
0.0684589	0.136531	-3832
0.297704	-0.101857	-3826
0.31782	-0.0088489	-3808
-0.0920814	-0.123015	-3812
-0.154565	-0.251509	-3828
-0.107462	0.0496222	-3590
-0.0667073	-0.128055	-3588
0.10592	0.12615	-3590
-0.106339	-0.160557	-3580
0.209377	-0.128229	-3590
-0.0707327	0.101766	-3586
0.128225	0.204077	-3578
0.288864	0.230366	-3596
0.245579	0.156589	-3604
-0.175791	0.138571	-3338
-0.0765295	0.101981	-3344
-0.164273	-0.0647543	-3348
0.0642586	0.0807773	-3362
0.168395	0.0928691	-3330
0.339798	-0.00498237	-3332
0.27195	-0.0216592	-3334
0.267563	0.0509907	-3338
0.283133	-0.0510072	-3340
0.343574	-0.110051	-3344
0.265258	-0.0409266	-3352
0.331717	-0.0944747	-3354
0.218319	0.0877295	-3360
0.246685	0.0312019	-3360
-0.0573425	-0.140253	-3094
-0.10061	-0.0461516	-3126
0.0228731	0.011297	-3098
0.253329	0.0418078	-3088
0.331663	-0.0359787	-3088
0.173077	0.0231481	-3092
0.258955	0.0401699	-3098
0.170773	0.0254765	-3098
0.28702	0.0220963	-3104
0.27394	0.0687377	-3104
0.19721	0.263212	-3112
0.171069	-0.00513866	-3116
0.156162	-0.0687698	-3118
0.228634	0.00425546	-3122
0.17213	0.09472	-3114
0.173238	-0.149795	-2878
0.0370225	0.174443	-2606
0.0753758	0.216899	-2612
0.125683	0.0657372	-2612
0.163805	0.101067	-2616
0.154763	0.105709	-2622
0.147159	0.112253	-2622
0.117747	0.228139	-2632
0.15995	0.149966	-2634
0.206401	0.151348	-2630
0.0860671	0.21391	-2636
0.183057	0.254557	-2640
0.17722	0.107425	-2642
0.265474	0.0352208	-2620
0.280358	0.0527885	-2624
0.22444	-0.0970609	-2626
0.17712	0.0461589	-2628
0.310439	0.0121724	-2632
0.0553963	-0.0701018	-2400
0.0631061	0.0101477	-2402
0.0932126	0.166939	-2402
0.0824102	0.0828153	-2402
0.2789	-0.0262294	-2400
-0.0799457	-0.100434	-5022
0.148603	0.135223	-4766
0.192481	0.27608	-4800
0.337784	0.0769882	-4536
0.235229	0.175539	-4540
0.220878	0.159683	-4542
0.158597	0.142276	-4556
0.198924	0.0402465	-4558
0.294085	0.00634511	-4564
-0.115267	-0.103424	-4564
-0.166098	-0.0850076	-4532
-0.147968	-0.135696	-4292
-0.146773	-0.0615652	-4318
0.143034	0.265877	-4308
0.282034	0.0128906	-4316
-0.0962183	-0.209057	-4058
-0.139551	-0.11026	-4062
0.241068	-0.0416279	-4050
0.134612	0.229954	-4062
0.277983	0.121766	-4068
0.282508	-0.0495773	-4086
0.192415	0.147406	-3806
-0.115056	-0.097572	-3818
-0.169624	-0.108589	-3670
-0.188169	-0.120028	-3656
0.169491	0.184491	-3666
0.243149	0.0651831	-3688
0.306597	-0.000611729	-3658
0.291139	0.00906038	-3656
0.243699	-0.030301	-3654
0.262966	-0.212888	-3690
0.0184324	-0.023911	-3346
-0.0750625	-0.0990157	-3346
-0.118743	0.0231785	-3336
0.124065	0.119698	-3094
0.0320026	0.00593976	-3112
0.158933	0.0564183	-3114
0.197557	0.144756	-3114
0.136568	0.158718	-3128
0.155576	0.0436732	-3130
0.182633	0.0519024	-3126
0.180205	-0.109682	-3096
0.148864	-0.106495	-3118
0.261015	-0.0434851	-3124
-0.102999	-0.0315554	-3120
-0.101786	-0.100179	-3102
0.187588	-0.00853045	-2858
-0.0535882	0.244727	-2868
-0.133524	0.0893432	-2872
-0.148621	-0.0250914	-2872
0.192147	0.00150767	-2868
0.250743	-0.0425976	-2884
0.211816	0.028513	-2882
0.223814	0.0846171	-2882
-0.160903	-0.0994907	-2862
0.186967	-0.111099	-2862
0.294903	-0.094374	-2870
0.320208	0.144385	-2866
0.32276	0.0189169	-2672
0.151898	0.0732899	-2672
0.140646	0.123021	-2672
0.102737	0.142798	-2668
0.171287	0.0992612	-2662
0.279444	0.0274278	-2652
0.16344	0.0458446	-2656
0.237895	-0.108816	-2660
0.274523	-0.166918	-2660
0.296083	-0.199549	-2666
0.339608	-0.150844	-2664
0.299063	-0.108562	-2664
0.315715	-0.141394	-2658
0.265321	-0.0160215	-2682
-0.189281	-0.172393	-2658
-0.128457	-0.240787	-2678
-0.0974449	-0.0991033	-2682
-0.122369	-0.136463	-2684
-0.195756	-0.106746	-2402
0.178388	0.179923	-2402
0.186772	0.178	-2790.27
0.103885	0.12918	-2784.71
-0.19326	-0.0682245	-2790.27
-0.310774	0.054181	-2790.39
-0.204526	-0.162095	-2787.49
-0.197898	0.0513232	-2718.53
-0.151435	-0.149029	-2716.32
0.268782	-0.263391	-2711.25
0.347035	-0.161427	-2708.41
0.329588	0.038679	-2713.77
0.261	-0.0453182	-2713.77
0.255107	-0.0196115	-2713.69
0.19804	-0.0151029	-2715.83
0.278575	-0.268193	-2627.49
0.340394	-0.258081	-2627.49
0.253163	0.0367932	-2630.27
0.294831	-0.038768	-2630.27
0.24859	0.138763	-2627.49
0.0040283	0.0598781	-2630.27
-0.137467	-0.0148894	-2630.27
-0.140071	-0.168768	-2627.49
-0.0840101	-0.104952	-2630.27
0.210963	-0.293106	-2627.49
-0.137219	-0.167715	-2550.27
-0.140528	-0.123082	-2550.27
0.240827	0.0399858	-2547.49
0.318996	-0.0605083	-2544.71
0.203534	0.0314327	-2550.27
0.0991082	0.221563	-2550.27
0.133186	0.121365	-2547.49
0.331034	-0.0533916	-2550.27
-0.239154	-0.141701	-2547.49
0.185844	0.186705	-2467.49
0.119493	0.0978722	-2467.49
-0.00875261	0.0815679	-2467.49
-0.105404	-0.146618	-2470.27
-0.17403	-0.126034	-2470.27
0.255579	-0.0702329	-2470.27
0.281208	-0.016626	-2467.49
0.205926	0.0372335	-2470.27
0.161322	0.0221208	-2470.27
0.27696	0.0670945	-2467.49
0.32725	0.0352517	-2464.71
0.360369	0.0057392	-2467.49
0.343436	-0.12517	-2790.18
0.366567	-0.102395	-2786.12
0.395868	-0.205337	-2783.29
0.261062	0.144098	-2784.44
0.0720697	-0.0724127	-2789.16
0.19056	0.167416	-2784.74
0.0478232	0.0926357	-2787.06
-0.219871	-0.24324	-2804.04
-0.189353	-0.0345502	-2797.57
-0.184625	-0.0623298	-2793.32
-0.222815	-0.0669034	-2794.16
-0.258251	-0.261269	-2802.4
-0.28966	-0.015563	-2797.67
0.443947	-0.05787	-2718.38
0.342321	0.0463131	-2718.38
0.230103	0.0203057	-2718.38
0.36847	-0.127824	-2711.88
0.362149	-0.0292003	-2712.41
0.202606	0.0089952	-2711.97
0.113571	-0.0759794	-2718.38
0.0123373	-0.0437962	-2718.38
-0.00332516	-0.0412425	-2718.38
0.180388	0.0654026	-2716.44
0.0601357	0.156229	-2715.51
0.33962	-0.031176	-2638.38
0.312246	0.0221806	-2638.38
0.354121	0.00887479	-2634.68
0.136236	0.0732698	-2638.38
0.106404	-0.0792993	-2638.38
0.208809	-0.161949	-2634.2
0.16711	0.128623	-2638.38
0.157105	0.230918	-2638.38
0.16192	0.248453	-2636.54
-0.158076	-0.217821	-2638.38
-0.261723	-0.257801	-2638.38
-0.222968	-0.286775	-2632.08
0.307025	-0.265676	-2551.71
0.313115	0.00767469	-2558.38
0.348575	-0.16988	-2553.81
0.271947	0.0648927	-2550.69
0.118185	-0.102345	-2555.26
0.201891	0.172866	-2558.38
0.163491	0.162933	-2558.38
0.164026	0.250208	-2551.58
0.0912295	0.0745614	-2552.63
0.221132	0.160994	-2549.29
0.212998	0.175012	-2547.76
0.181228	0.196555	-2548.47
0.166515	0.128748	-2550.02
-0.200059	-0.226957	-2548.99
-0.0126712	0.0539925	-2558.38
-0.198688	-0.103909	-2558.38
-0.172505	-0.141841	-2550.52
-0.229391	-0.232611	-2547.26
0.302011	0.0597916	-2478.38
0.301749	-0.00980692	-2478.38
0.286143	0.069508	-2478.38
0.283799	-0.00833927	-2478.38
0.256735	0.0614585	-2478.38
0.251419	0.0554438	-2478.38
0.247538	0.0429222	-2478.38
0.238208	0.0735781	-2478.38
0.224201	0.019064	-2478.38
0.223887	0.0445682	-2478.38
0.2213	0.0289553	-2478.38
0.264882	0.129929	-2478.38
0.25348	0.181016	-2478.38
0.253652	0.0932707	-2478.38
0.236427	0.0899909	-2478.38
0.231621	0.0864437	-2478.38
0.210209	0.0551789	-2478.38
0.209755	0.109834	-2478.38
-0.0876922	-0.126638	-2471.96
-0.0616022	-0.0308052	-2468.14
-0.215681	-0.363015	-2462.18
-0.242005	-0.150889	-2462.18
