# Supplementary material for: Spinal premotor interneurons controlling antagonistic muscles are spatially intermingled
Source: eLife. 2022 Dec 13;11:e81976. doi: 10.7554/eLife.81976 (PMC9844990; doi:10.7554/eLife.81976)
Supplement: Figure 3—figure supplement 1—source data 8. [file elife-81976-fig3-figsupp1-data8.xlsx]

## Sheet: Sheet1
0.0715648	0.0255139	-2366
-0.0395295	-0.0893275	-2380
0.0553963	-0.0701018	-2400
0.0733589	0.0911634	-2370
0.126395	0.0429472	-2382
0.153857	0.0886626	-2384
0.192578	0.156647	-2384
0.100373	0.161699	-2388
0.241638	0.115557	-2390
0.264461	0.0379311	-2388
0.319033	0.0636835	-2386
0.321689	0.0446963	-2394
0.272989	0.0648617	-2398
0.217625	0.0729061	-2398
0.2065	0.0356978	-2394
0.191861	-0.0540851	-2370
0.308042	-0.0732241	-2368
0.338951	-0.0161901	-2370
0.1753	-0.0157926	-2378
0.272041	-0.233326	-2390
0.3042	-0.2354	-2394
0.244505	-0.0240178	-2392
0.2789	-0.0262294	-2400
-0.0614829	-0.0695808	-2154
-0.179468	-0.103085	-2138
0.240799	0.139399	-2130
0.0757516	0.19747	-2132
0.114576	0.123616	-2132
0.128003	0.170406	-2142
0.0524253	0.0367662	-2144
0.0393807	0.00403578	-2144
0.314518	0.0360999	-2142
0.305039	0.00788011	-2144
0.248593	0.0707142	-2146
0.137257	0.00533764	-2150
0.165806	0.012988	-2146
0.106692	0.131465	-2144
0.157686	0.202593	-2154
0.24601	0.150832	-2158
0.180074	0.0123141	-2158
0.298683	0.054326	-2160
0.0546209	0.0977164	-2158
0.207225	-0.0229358	-2162
0.191384	-0.0695502	-2148
0.20545	-0.0751176	-2150
0.296128	-0.0947374	-2150
0.316051	-0.0924783	-2140
0.274503	-0.138572	-2132
0.092671	0.0785382	-1890
0.099015	0.0627278	-1904
-0.152148	0.0193451	-1910
-0.130197	-0.140321	-1914
-0.112485	-0.108618	-1918
-0.164089	-0.104555	-1918
0.213811	0.108892	-1890
0.250127	0.0656802	-1894
0.158571	0.173387	-1890
0.256217	0.0235169	-1892
0.122962	0.185457	-1896
0.194923	0.145904	-1902
0.218357	0.148938	-1906
0.19549	0.135395	-1908
0.176438	0.149692	-1910
0.161181	0.121551	-1906
0.13211	0.03271	-1902
0.295083	0.0339841	-1918
0.297463	0.0134196	-1914
0.106977	0.0898	-1918
0.216226	0.0636457	-1918
0.14674	0.289053	-1922
0.0641925	0.162207	-1920
0.109905	0.038882	-1920
0.254922	-0.00634333	-1918
0.146167	0.00159611	-1898
0.185526	0.0886012	-1892
0.296881	-0.0274216	-1888
0.295696	-0.123695	-1888
0.270812	-0.134676	-1904
0.232962	-0.258892	-1906
0.282116	-0.0501987	-1908
0.294605	-0.041951	-1912
0.110712	-0.0399233	-1908
0.323895	-0.119146	-1910
0.216514	-0.185299	-1918
0.224044	-0.197404	-1916
0.190327	-0.297082	-1916
0.189844	-0.122715	-1920
-0.0567167	-0.00409458	-1648
-0.0735304	-0.132134	-1652
-0.106239	-0.163553	-1650
0.0489121	0.0292863	-1656
-0.117283	-0.153417	-1660
-0.00787609	0.0619835	-1664
-0.134961	-0.13145	-1670
-0.25396	-0.132788	-1672
-0.043357	-0.0860011	-1674
-0.125116	-0.114879	-1676
0.0939191	0.282608	-1648
0.080895	0.265561	-1662
0.255698	0.0873313	-1662
0.0992102	0.24754	-1670
0.160629	0.127356	-1672
0.0953601	0.159221	-1676
0.111706	0.0834299	-1676
0.219695	0.191286	-1674
0.226229	0.188953	-1670
0.0702633	0.183149	-1680
0.153166	0.296237	-1682
0.203722	0.148066	-1682
0.256331	0.0300666	-1648
0.276598	0.0555035	-1650
0.250688	-0.132104	-1654
0.191424	-0.221799	-1656
0.136682	-0.0238764	-1656
0.104743	0.0115555	-1652
0.196264	-0.049462	-1660
0.293605	-0.109892	-1666
0.327045	-0.00963082	-1672
0.283831	-0.00639082	-1674
0.328293	0.0302152	-1670
0.245952	-0.166466	-1680
0.270763	-0.207605	-1674
-0.0248438	-0.0190472	-2374
0.13464	-0.122756	-2394
0.306331	0.144713	-2396
0.175536	0.160553	-2398
0.101841	0.145827	-2396
0.14233	0.0805444	-2388
0.305866	0.0130157	-2384
0.336478	0.104602	-2382
0.112076	0.211195	-2380
0.193619	0.179498	-2376
0.265885	0.131144	-2374
0.236853	0.0686857	-2370
0.225739	-0.0578392	-2372
0.212352	-0.291289	-2370
0.347113	-0.0593194	-2374
0.262218	-0.176674	-2376
0.334906	-0.0311527	-2380
0.344312	-0.127359	-2378
0.365239	-0.144305	-2382
0.289699	-0.0869758	-2390
0.28995	-0.0559932	-2394
0.187367	0.181495	-2170
0.325714	0.0319873	-2172
0.284842	0.0790654	-2174
0.142714	0.0459883	-2184
0.27257	0.114489	-2182
0.185293	0.148545	-2188
0.0761656	0.266399	-2188
0.170478	0.256925	-2184
0.17337	0.127504	-2194
0.109476	0.117719	-2194
0.285303	0.240832	-2200
0.240116	0.0762653	-2200
0.16729	0.174407	-2208
0.280508	0.0354557	-2214
0.304313	0.0381286	-2192
0.332914	-0.0709194	-2214
0.271115	0.0119962	-2212
0.267465	-0.00638792	-2208
0.284704	-0.0369513	-2206
0.347695	-0.0696387	-2192
0.193019	-0.244181	-2186
0.183027	-0.147415	-2180
0.200713	-0.109867	-2172
0.265615	-0.122071	-2172
0.323692	-0.152634	-2174
0.261834	-0.274307	-2214
-0.0690911	-0.086042	-2170
-0.08986	-0.122667	-2174
-0.0516817	-0.130479	-2182
-0.126431	-0.00299111	-2176
-0.136885	-0.135515	-2178
-0.134889	-0.145124	-2190
-0.154913	-0.0830827	-2202
-0.064612	-0.117059	-2212
-0.189357	-0.112922	-2210
-0.10088	-0.142419	-1898
0.21349	0.267437	-1890
0.189023	0.109047	-1892
0.158558	0.128542	-1900
0.163396	0.0899227	-1902
0.0620968	0.139061	-1898
0.253592	0.157552	-1918
0.153739	0.129032	-1922
0.0981472	0.226091	-1924
0.240882	-0.133995	-1892
0.251093	0.038509	-1898
0.218342	-0.0539347	-1902
0.203886	0.0241185	-1900
0.303486	-0.13115	-1904
0.214456	0.0149437	-1914
-0.14778	-0.111658	-1606
-0.148823	-0.0689644	-1614
-0.0929706	-0.0741484	-1618
0.0275969	-0.00365195	-1612
0.040676	-0.0583783	-1642
0.12445	-0.025458	-1612
0.252309	-0.0781768	-1612
0.312878	-0.0763145	-1614
0.219386	-0.0368629	-1616
0.262648	-0.228019	-1622
0.327423	-0.0669898	-1624
0.287357	-0.063153	-1622
0.224624	-0.0286741	-1628
0.336439	-0.0190786	-1630
0.340354	-0.0878449	-1630
0.253726	-0.0150569	-1640
0.298602	-0.0344591	-1642
0.27872	-0.177195	-1640
0.213335	0.0779457	-1606
0.106484	0.144401	-1608
0.277638	0.162442	-1612
0.297334	0.131748	-1620
0.1645	0.0949969	-1616
0.237874	0.248907	-1624
0.241915	0.144196	-1622
0.0798531	0.11889	-1626
0.0993565	0.20725	-1626
0.216196	0.163605	-1626
0.230313	0.140366	-1630
0.193722	0.129489	-1630
0.150904	0.310112	-1632
0.16702	0.143899	-1640
0.119947	0.0925072	-1642
0.212731	0.215346	-1642
0.275705	0.242891	-1642
0.327438	0.081517	-1606.95
0.374237	-0.0191739	-1601.39
0.235702	-0.225051	-1601.39
0.224796	-0.0529528	-1604.17
0.248746	-0.0353767	-1604.17
0.215617	-0.0373983	-1604.17
0.244678	0.00713585	-1604.17
0.078928	-0.0108927	-1606.95
0.0556075	0.0394608	-1606.95
0.0813369	0.06197	-1604.17
0.142216	0.112032	-1606.95
0.184991	0.243623	-1606.95
0.11303	-0.0173515	-1601.39
0.0351383	0.0380978	-1604.17
0.0175803	0.0295044	-1601.39
-0.0515321	-0.194196	-1604.17
-0.101161	-0.214332	-1606.95
-0.151964	-0.103921	-1604.17
-0.24042	-0.153106	-1604.17
-0.258342	-0.0889189	-1681.39
-0.186206	0.123502	-1684.17
-0.201612	0.148635	-1681.39
-0.150016	-0.107442	-1681.39
-0.116615	-0.102056	-1681.39
0.036204	2.77099e-05	-1681.39
0.061295	-0.117739	-1681.39
0.147772	-0.0311299	-1681.39
0.165554	-0.0279034	-1681.39
0.154663	0.00823609	-1681.39
0.114972	-0.0389811	-1681.39
0.131597	-0.141074	-1681.39
0.207958	-0.111262	-1681.39
0.214279	-0.0301429	-1681.39
0.205781	0.0223739	-1681.39
0.253253	0.0462593	-1681.39
0.277975	0.075425	-1681.39
0.210528	0.116783	-1681.39
0.225068	0.171915	-1681.39
0.354957	0.251678	-1681.39
0.365416	0.0906332	-1681.39
0.347335	0.00981988	-1681.39
0.361726	-0.0301727	-1681.39
0.31796	0.00473684	-1681.39
0.243131	-0.261025	-1681.39
0.199826	-0.345436	-1681.39
0.312759	-0.0348685	-1761.39
0.289783	0.000238966	-1761.39
0.353969	-0.0273306	-1761.39
0.335722	-0.0742145	-1761.39
0.394506	-0.0350622	-1761.39
0.286833	-0.141345	-1761.39
0.260222	0.0950001	-1761.39
0.261536	-0.246445	-1761.39
0.158246	0.0322148	-1761.39
0.185112	0.0403879	-1761.39
0.159845	0.116864	-1761.39
0.211613	0.110732	-1761.39
0.226887	0.182315	-1761.39
0.175393	0.254896	-1761.39
0.10393	0.176649	-1761.39
0.125556	0.124879	-1761.39
0.0912724	0.133966	-1761.39
0.0868529	-0.0374405	-1761.39
0.0582475	-0.00632126	-1761.39
-0.0634025	-0.203427	-1761.39
-0.127751	-0.21134	-1761.39
-0.148205	-0.167724	-1761.39
-0.118986	-0.075782	-1761.39
-0.147495	0.0491718	-1761.39
-0.30631	0.214098	-1761.39
-0.144057	-0.0558682	-1846.95
-0.0901484	-0.103159	-1844.17
-0.093623	-0.241771	-1841.39
-0.156147	-0.238518	-1849.73
-0.189239	-0.15562	-1841.39
-0.35509	-0.15242	-1846.95
0.0464641	-0.0219018	-1844.17
0.116056	0.124862	-1841.39
0.147677	0.0599802	-1841.39
0.113322	-0.0164465	-1841.39
0.201741	0.0972625	-1841.39
0.214324	0.140614	-1841.39
0.229502	0.158064	-1844.17
0.215427	0.240181	-1841.39
0.356029	-0.00695778	-1841.39
0.38445	0.00260519	-1841.39
0.374978	-0.0715827	-1844.17
0.294311	-0.402387	-1841.39
0.260656	-0.295745	-1841.39
0.0587589	0.0102222	-1841.39
-0.0692808	0.000596918	-1921.39
0.0326209	-0.105324	-1921.39
0.0106213	-0.0699665	-1921.39
0.0445149	-0.000654471	-1921.39
0.0976181	-0.0210754	-1921.39
0.164911	0.00950346	-1921.39
0.208827	-0.0755142	-1921.39
0.298661	-0.230539	-1921.39
0.201461	-0.294378	-1921.39
-0.101322	-0.294986	-1921.39
-0.155389	-0.213174	-1921.39
-0.20262	-0.00733255	-1921.39
0.140669	0.180124	-1921.39
0.204051	0.0887715	-1921.39
0.319805	0.164997	-1921.39
0.317181	0.150948	-1921.39
0.376492	-0.110953	-1921.39
0.335955	-0.380096	-1921.39
-0.141315	-0.267066	-2001.39
-0.0647024	-0.134172	-2001.39
-0.196924	-0.193327	-2001.39
-0.215908	0.228513	-2001.39
-0.0593222	0.208867	-2001.39
0.091713	0.0787568	-2001.39
0.13237	0.0611217	-2001.39
0.0488199	0.00940069	-2001.39
0.221634	0.131042	-2001.39
0.265451	0.119818	-2001.39
0.238009	0.151274	-2001.39
0.275696	0.173419	-2001.39
0.333084	0.263027	-2001.39
0.218418	0.110666	-2001.39
0.204436	0.0624781	-2001.39
0.235877	-0.0818399	-2001.39
0.238904	-0.115081	-2001.39
0.258841	-0.15133	-2001.39
0.368507	0.038115	-2001.39
0.367947	-0.119775	-2004.17
0.391645	-0.162892	-2001.39
0.2554	-0.248111	-2001.39
-0.208109	-0.312046	-2395.84
-0.144395	-0.0718251	-2393.05
-0.0928934	-0.167668	-2390.27
-0.0595234	-0.0306853	-2390.27
0.172968	-0.113383	-2390.27
0.243549	-0.190312	-2387.49
0.351313	-0.233035	-2390.26
0.307995	-0.0811662	-2390.26
0.215366	0.132208	-2390.26
0.172223	0.106885	-2393.05
0.130954	0.0690938	-2387.49
0.350566	0.0100946	-2307.49
0.306758	-0.0908127	-2310.27
0.358966	-0.196381	-2310.27
0.215611	0.0761764	-2310.27
0.219606	0.0920547	-2310.27
0.209055	0.156412	-2310.27
0.167029	0.0697685	-2313.05
0.0826506	0.19364	-2313.05
-0.0791839	-0.176171	-2313.05
-0.113387	-0.218669	-2313.05
-0.125594	-0.201837	-2315.83
-0.204039	-0.1657	-2315.83
0.142907	0.0543369	-2230.27
0.15897	0.0347334	-2230.27
0.177499	0.0645712	-2233.05
0.192564	0.0449994	-2233.04
0.237648	0.140686	-2230.26
0.173075	0.13386	-2230.27
0.138375	0.12268	-2230.27
0.324652	-0.194345	-2233.04
0.333006	0.045604	-2230.26
0.283701	0.135888	-2166.95
0.221666	0.17376	-2166.95
0.223706	0.233153	-2166.95
0.190377	0.0239485	-2166.95
0.275658	0.0010387	-2166.95
0.247444	0.0141683	-2169.73
0.311082	0.0238396	-2166.95
0.358955	0.0119177	-2166.95
0.293846	-0.105306	-2166.95
0.31805	-0.18422	-2169.73
0.349262	-0.367001	-2166.96
0.30354	-0.362207	-2166.95
0.201255	-0.141077	-2164.17
0.193438	0.0708475	-2166.95
0.158163	0.152384	-2067.49
0.14626	0.163245	-2067.49
0.101792	0.115726	-2070.27
0.123534	0.0766929	-2064.71
0.164042	0.0734496	-2064.71
0.15962	0.101584	-2064.71
0.205955	0.00334718	-2064.71
0.17956	0.0518428	-2064.71
0.178211	-0.0169446	-2064.71
0.190652	-0.103511	-2064.71
0.28992	-0.143438	-2064.71
0.265597	0.109452	-2064.71
0.330518	0.0363516	-2064.71
0.238402	0.0269336	-2067.49
-0.103612	-0.000407382	-2067.49
-0.0928973	-0.0488167	-2067.49
-0.119728	-0.111529	-2067.49
-0.108246	-0.188219	-2067.49
0.361217	0.0827074	-2064.71
0.0269581	0.222385	-2070.27
-0.116032	-0.232594	-1990.27
-0.29611	0.249037	-1987.49
-0.179412	0.128925	-1987.49
-0.066212	-0.186322	-1987.49
0.0595038	0.28107	-1987.49
0.137947	0.158965	-1987.49
0.17325	0.067675	-1987.49
0.142782	0.0725781	-1987.49
0.171617	0.00939144	-1984.71
0.237092	0.020988	-1987.49
0.205804	0.0411895	-1987.49
0.220706	0.060349	-1987.49
0.206935	0.0940601	-1990.27
0.215049	0.124205	-1987.49
0.19251	0.119943	-1990.27
0.250497	0.0995688	-1987.49
0.307884	0.0668983	-1990.27
0.312748	0.00421814	-1987.49
0.314341	0.242927	-1987.49
0.314699	-0.148835	-1987.49
0.351782	-0.0771082	-1987.49
0.278878	-0.0894827	-1987.49
0.254936	-0.0601233	-1984.71
-0.212254	-0.12966	-1907.49
-0.145257	-0.0680622	-1907.49
0.14278	0.0915639	-1907.49
0.0581337	0.0363339	-1910.27
0.205685	0.170408	-1907.49
0.138545	0.154731	-1907.49
0.0551039	0.159406	-1907.49
0.0897795	0.234149	-1907.49
0.163454	0.136802	-1907.49
0.187864	0.10513	-1907.49
0.132021	0.0633493	-1907.49
0.235961	0.00738832	-1907.49
0.266119	0.0311745	-1907.49
0.307089	-0.090088	-1907.49
0.327303	-0.164449	-1910.27
0.259183	-0.308329	-1907.49
0.392713	0.0562091	-1907.49
0.344048	0.0506419	-1907.49
0.281863	0.0974941	-1910.27
0.298074	0.148225	-1907.49
0.329802	0.142037	-1907.49
0.344384	-0.126046	-1907.49
0.312448	-0.0341965	-1907.49
0.224552	0.275549	-1830.27
0.138317	0.124669	-1830.27
0.171333	0.0954572	-1827.49
0.174795	0.0738764	-1827.49
0.18446	0.0284232	-1830.27
0.220437	0.0034253	-1830.27
0.18862	-0.0268384	-1830.27
0.250862	-0.0332213	-1830.27
0.269773	-0.0256052	-1830.27
0.281245	0.0370205	-1830.27
0.273892	0.0544853	-1827.49
0.246611	0.0741177	-1830.27
0.242331	0.0990488	-1830.27
0.060764	0.202553	-1827.49
0.03763	0.0017919	-1827.49
0.337207	-0.0301319	-1830.27
0.425033	-0.0112689	-1830.27
0.306325	-0.194183	-1830.27
-0.106601	-0.108858	-1827.49
-0.166383	-0.0382967	-1830.27
-0.138323	0.0793652	-1827.49
-0.15908	0.00215822	-1747.49
-0.227162	0.0677003	-1747.49
-0.379716	0.275205	-1747.49
0.113259	0.0374146	-1747.49
0.160356	0.0306029	-1744.71
0.106163	0.19989	-1747.49
0.182505	0.179429	-1747.49
0.225099	0.215488	-1747.49
0.198192	0.0429041	-1747.49
0.264779	0.104922	-1750.27
0.366477	0.0445272	-1747.49
0.358926	0.0883206	-1747.49
0.330531	-0.0812879	-1750.27
0.308349	-0.0221327	-1747.49
0.365938	-0.12974	-1747.49
0.273543	-0.305684	-1750.27
0.194709	-0.339903	-1750.27
0.286904	0.0275377	-1747.49
0.182797	0.157204	-1670.27
-0.184545	-0.175132	-1667.49
-0.136757	-0.272039	-1664.71
-0.128487	-0.0759275	-1664.71
0.0656112	0.136615	-1667.49
0.134721	0.1051	-1667.49
0.238526	0.147184	-1667.49
0.279854	0.139464	-1667.49
0.29709	0.0702161	-1667.49
0.326218	-0.0528039	-1667.49
0.232735	-0.0536906	-1670.27
0.27745	-0.332947	-1670.27
0.371014	-0.159106	-1670.27
0.393777	-9.00665e-05	-1670.27
0.209087	0.10613	-1667.49
-0.205187	0.00421177	-1998.61
-0.188329	0.00976241	-1995.83
0.170241	0.214924	-1997.85
0.35857	-0.208839	-1993.05
-0.211007	0.0785829	-1918.61
-0.226285	0.0525656	-1915.83
0.299065	0.0794045	-1913.05
0.35954	-0.027088	-1913.05
0.256935	0.11356	-1915.83
0.267319	0.120823	-1918.61
0.391573	-0.0213187	-1838.61
0.369733	-0.302016	-1838.61
0.291417	0.0186909	-1838.61
0.317623	0.0122702	-1838.61
0.193822	0.0909319	-1838.61
0.185782	0.191487	-1838.61
0.447345	-0.123612	-1838.61
-0.0613751	0.282776	-1758.61
0.169958	-0.218903	-1758.61
0.418002	-0.135939	-1758.61
0.411098	-0.176498	-1755.98
-0.227757	-0.0643406	-1675.83
0.055093	0.291823	-1670.88
0.0843993	0.211102	-1673.05
0.0877238	0.194642	-1673.05
0.145926	0.137373	-1675.83
0.160943	0.119264	-1673.05
0.152955	0.108697	-1673.05
0.102159	0.121057	-1675.83
0.125242	0.0585303	-1673.05
0.164891	0.0702188	-1673.05
0.22676	0.0924347	-1678.61
0.0896585	0.127025	-1678.61
0.114706	0.108898	-1673.05
0.12826	0.101446	-1673.05
0.121604	0.0825044	-1675.83
0.196065	0.235228	-1672.02
0.203217	0.223297	-1670.27
0.159152	0.195212	-1670.27
0.324632	-0.160317	-2398.38
0.313584	-0.122879	-2398.38
0.304149	-0.180667	-2398.38
0.294697	0.0193387	-2398.38
0.256747	0.0618456	-2398.38
0.253578	0.0212435	-2398.38
0.21909	-0.0285426	-2398.38
0.212009	0.00970076	-2398.38
0.224695	0.207905	-2398.38
0.216433	0.106414	-2398.38
0.197414	0.108861	-2398.38
0.186948	-0.0230901	-2393.09
0.187484	0.1298	-2398.38
0.164103	0.14386	-2398.38
0.138143	0.0826942	-2398.38
0.135414	0.155778	-2398.38
0.131546	0.102106	-2398.38
0.105062	0.181393	-2398.38
0.0971668	0.256097	-2398.38
0.164116	0.111471	-2394.56
0.100442	0.18551	-2396.11
-0.0507917	0.13193	-2389.51
0.327947	-0.161047	-2318.38
0.316872	0.0120003	-2318.38
0.292091	0.00251078	-2318.38
0.291805	-0.175986	-2318.38
0.273613	-0.0365723	-2318.38
0.254995	0.00120455	-2318.38
0.220101	-0.0466176	-2318.38
0.256488	0.0770628	-2318.38
0.225181	0.116753	-2318.38
0.198494	0.083166	-2318.38
0.185374	0.176266	-2318.38
0.176739	0.0922709	-2318.38
0.0977733	0.194096	-2318.38
0.0670876	0.117867	-2318.38
0.1203	0.129044	-2314.97
-0.194138	-0.281324	-2318.38
-0.178561	-0.244531	-2309.02
-0.202444	-0.239544	-2308.43
-0.126415	-0.139456	-2318.38
-0.182578	-0.168456	-2318.38
-0.0985715	-0.0565009	-2311.18
0.468689	-0.101857	-2238.38
0.309999	-0.211332	-2238.38
0.280473	-0.23087	-2238.38
0.307881	0.0867232	-2238.38
0.306642	-0.100304	-2238.38
0.256311	-0.0861351	-2238.38
0.234462	0.0455316	-2238.38
0.210842	0.165191	-2238.38
0.124756	-0.0502622	-2238.38
0.179899	0.0908292	-2238.38
0.152999	0.295279	-2238.38
0.147025	0.290128	-2238.38
0.147213	0.0963678	-2238.38
0.139785	0.113009	-2238.38
0.119539	0.232762	-2238.38
0.158334	0.0919306	-2234.9
-0.173106	0.0812841	-2230.13
-0.249401	0.170126	-2230.98
-0.249969	0.157825	-2230.78
-0.245933	0.190913	-2227.65
-0.269889	0.254341	-2230.14
-0.374618	0.26791	-2228.77
0.23624	-0.0128158	-2153.91
0.319785	-0.132689	-2151.25
0.300614	0.0190958	-2152.31
0.295213	-0.0326885	-2148.23
0.216493	0.0167015	-2150.01
0.260296	0.0417957	-2151.18
0.238816	0.228595	-2150.57
0.220545	0.158044	-2153.01
0.217556	0.0462491	-2152.29
0.197295	0.160031	-2151.13
0.308891	0.127289	-2148.05
0.211789	0.0725259	-2149.02
0.165025	0.0148533	-2150.06
0.150735	0.00948237	-2149.46
0.125274	0.0242366	-2147.38
0.183473	0.0982542	-2152.53
0.169835	0.145946	-2151.31
0.0786964	0.238281	-2151.11
0.15364	0.0911184	-2150.2
-0.199025	-0.163381	-2148.21
-0.162431	0.331432	-2147.22
-0.23119	-0.171765	-2147.6
0.40631	0.214514	-2146.67
0.234213	-0.213097	-2144.93
0.30831	0.203391	-2145.16
0.272901	0.0889169	-2145.76
0.134776	0.0645025	-2142.18
0.0709476	0.21938	-2142.18
0.13949	0.283313	-2142.18
-0.183273	-0.179679	-2146.04
-0.178428	0.321737	-2145.11
-0.182751	0.337113	-2146.62
-0.18234	0.299428	-2142.18
0.375386	-0.185007	-2073.07
0.25209	-0.221896	-2078.38
0.339646	-0.220177	-2074.9
0.318705	0.0409748	-2078.38
0.317032	-0.0538208	-2078.38
0.280045	0.0253822	-2078.38
0.267494	0.00885962	-2078.38
0.233783	0.060011	-2078.38
0.232777	0.068605	-2078.38
0.226343	0.0365911	-2078.38
0.216597	0.0704709	-2078.38
0.208961	0.0613353	-2078.38
0.207962	0.00301419	-2078.38
0.196399	0.0234221	-2078.38
0.297235	0.0523295	-2074.17
0.222384	-0.0286241	-2075.09
0.270947	-0.0560745	-2072.07
0.184143	0.0395142	-2071.91
0.303153	-0.192491	-2068.52
0.229777	0.00262291	-2070.27
0.343515	0.153884	-2078.38
0.335464	0.100776	-2078.38
0.307198	0.139264	-2078.38
0.277359	0.120509	-2078.38
0.263046	0.117575	-2078.38
0.24074	0.0933267	-2078.38
0.213619	0.148628	-2078.38
0.186013	0.238093	-2078.38
0.179966	0.147197	-2078.38
0.323523	0.0959404	-2075.11
0.210633	0.180294	-2076.06
0.329854	0.148388	-2071.76
0.174187	0.0366296	-2076.24
0.175717	-0.038384	-2069
0.173521	0.158677	-2078.38
0.167096	0.173815	-2078.38
0.167918	0.104583	-2078.38
0.144004	0.264876	-2078.38
0.136788	0.173146	-2071.03
0.121552	0.144152	-2070.32
0.051673	0.192292	-2073.52
-0.160675	-0.240266	-2078.38
-0.12447	-0.233343	-2069.34
-0.160496	-0.257612	-2068.24
-0.0864436	-0.175952	-2071.36
-0.154199	0.267539	-2075.23
-0.164981	0.259631	-2074.13
-0.160056	0.274643	-2070.83
-0.120233	0.337406	-2078.38
-0.134763	0.32725	-2075.5
-0.10854	0.0417575	-2065.86
0.253199	-0.195809	-1996.26
0.208191	0.0571295	-1998.38
0.328927	0.0812655	-1994.8
0.193888	0.0581002	-1995.47
0.178845	0.0108619	-1993.17
0.208959	0.132236	-1992.96
0.202591	0.152097	-1992.46
0.193787	0.142907	-1990.5
0.145106	0.0680685	-1998.38
0.0590646	0.0676263	-1998.38
0.0878826	0.0472635	-1996.04
0.15851	0.107468	-1998.38
0.155852	0.236424	-1998.38
0.156415	0.150742	-1998.38
0.147346	0.195037	-1998.38
0.127697	0.1835	-1998.38
0.0521857	0.190296	-1998.38
0.137983	0.121231	-1994.6
0.137624	0.10927	-1993.84
0.103834	0.230954	-1994.73
0.0451436	0.186438	-1995.61
0.0241774	0.114688	-1993.77
0.102538	0.185828	-1992.48
0.0851727	0.200602	-1988.45
-0.12414	-0.189422	-1998.38
-0.193794	-0.172523	-1992.18
-0.0590972	-0.178715	-1989.92
-0.235874	0.0389182	-1998.38
-0.239472	0.052128	-1998.38
-0.253371	0.0548968	-1998.38
-0.260695	0.0578991	-1993.55
0.301328	0.0478069	-1918.38
0.259832	-0.165083	-1918.38
0.236882	-0.0728371	-1918.38
0.204281	0.0683541	-1918.38
0.194708	0.0044736	-1918.38
0.331207	0.074242	-1914.59
0.304507	-0.0599944	-1913.14
0.258758	0.0363732	-1910.4
0.236782	-0.0378317	-1911.63
0.223123	0.0589747	-1910.26
0.26606	0.0933841	-1918.38
0.203959	0.120854	-1918.38
0.201586	0.081324	-1918.38
0.178574	0.140077	-1918.38
0.176376	0.23914	-1914.85
0.169489	0.0194916	-1918.38
0.0787797	-0.137273	-1918.38
0.146113	-0.028242	-1912.93
0.165138	0.126712	-1918.38
0.157139	0.134095	-1918.38
0.145561	0.0983091	-1918.38
0.119341	0.210712	-1918.38
0.107975	0.190715	-1918.38
0.0970882	0.182765	-1918.38
-0.00439748	0.185153	-1918.38
0.0890023	0.205114	-1910.53
-0.129028	-0.199147	-1918.38
-0.148057	-0.0371424	-1910.66
-0.0601934	-0.117916	-1908.69
-0.215206	-0.308239	-1918.38
0.369127	0.204318	-1831.53
0.272411	-0.0444114	-1838.38
0.25724	0.0031203	-1838.38
0.253089	0.0230616	-1838.38
0.241598	0.0231449	-1838.38
0.219992	0.0196114	-1838.38
0.217918	-0.134246	-1838.38
0.215024	-0.00825944	-1838.38
0.213811	-0.0985938	-1838.38
0.212276	0.0111508	-1838.38
0.204534	0.0272082	-1838.38
0.203751	-0.000357994	-1838.38
0.179879	0.0627472	-1838.38
0.177623	0.0217891	-1838.38
0.166337	0.0735649	-1838.38
0.161216	0.0690608	-1838.38
0.314976	0.0797738	-1834.4
0.179776	0.0840665	-1836.51
0.322817	0.120352	-1838.38
0.304635	0.12341	-1838.38
0.299171	0.219146	-1838.38
0.24854	0.254057	-1838.38
0.238785	0.191884	-1838.38
0.239035	0.200542	-1838.38
0.196184	0.111223	-1838.38
0.198535	0.268303	-1833.17
0.154339	0.0622165	-1838.38
0.154374	0.0762581	-1838.38
0.152132	0.0460104	-1838.38
0.14796	0.0296034	-1838.38
0.144462	0.0725833	-1838.38
0.0721694	0.000506496	-1830.93
0.142039	0.10374	-1838.38
0.109299	0.104836	-1838.38
0.0711608	0.202487	-1838.38
0.136151	0.176285	-1832.26
0.124556	0.165022	-1831.69
-0.10779	0.336018	-1835.93
0.304687	-0.0608078	-1758.38
0.297458	-0.00207572	-1758.38
0.292718	-0.0943435	-1758.38
0.265051	-0.00292293	-1758.38
0.259374	0.000915968	-1758.38
0.253093	-0.00371126	-1758.38
0.363036	0.0998742	-1758.38
0.306301	0.118918	-1758.38
0.296667	0.13326	-1758.38
0.283825	0.161361	-1758.38
0.273282	0.162624	-1758.38
0.259549	0.185133	-1758.38
0.260158	0.149491	-1758.38
0.253186	0.104227	-1758.38
0.250399	0.159803	-1758.38
0.242133	0.0950999	-1758.38
0.236972	0.203503	-1758.38
0.234703	0.164418	-1758.38
0.232198	0.09666	-1758.38
0.223969	0.0167717	-1758.38
0.206743	0.0714628	-1758.38
0.123752	0.0680958	-1758.38
0.211225	0.0514942	-1754.73
0.212432	0.221313	-1758.38
0.208616	0.0993039	-1758.38
0.160249	0.175359	-1758.38
0.162439	0.106178	-1758.38
0.159627	0.087345	-1758.38
0.149436	0.124941	-1758.38
0.14976	0.0938778	-1758.38
0.149355	0.0837097	-1758.38
0.148197	0.113433	-1758.38
0.132223	0.188119	-1758.38
0.117219	0.273428	-1758.38
0.11405	0.169335	-1758.38
0.110865	0.236265	-1758.38
0.0994966	0.136	-1758.38
0.0579244	0.290632	-1758.38
0.172123	0.191029	-1756.12
-0.10031	-0.254844	-1758.38
-0.0607807	-0.0956562	-1758.38
-0.0682136	0.0225425	-1758.38
-0.0621856	-0.169292	-1758.38
-0.105881	-0.0184727	-1758.38
-0.0881181	0.33896	-1754.5
-0.14476	-0.310846	-1758.38
-0.15321	-0.179604	-1758.38
0.230069	-0.329218	-1678.38
0.281213	-0.0201033	-1678.38
0.273252	-0.0730683	-1678.38
0.234599	-0.0223828	-1678.38
0.276794	0.0881155	-1678.38
0.269922	0.283705	-1678.38
0.244687	0.116004	-1678.38
0.237845	0.136289	-1678.38
0.226865	0.184388	-1678.38
0.222556	0.114077	-1678.38
0.209933	0.181576	-1678.38
0.202177	0.151551	-1678.38
0.168039	0.0636463	-1678.38
0.147263	0.0527444	-1678.38
0.14367	-0.00331507	-1678.38
0.143381	0.0297727	-1678.38
0.117001	0.0477283	-1678.38
0.0718797	-0.0158466	-1678.38
0.0604667	0.0381606	-1678.38
0.147721	0.0960361	-1678.38
0.127075	0.112971	-1678.38
0.122555	0.123474	-1678.38
0.120794	0.189899	-1678.38
0.0988963	0.252357	-1678.38
-0.0996039	-0.104501	-1678.38
