# Supplementary material for: Spinal premotor interneurons controlling antagonistic muscles are spatially intermingled
Source: eLife. 2022 Dec 13;11:e81976. doi: 10.7554/eLife.81976 (PMC9844990; doi:10.7554/eLife.81976)
Supplement: Figure 3—figure supplement 1—source data 9. [file elife-81976-fig3-figsupp1-data9.xlsx]

## Sheet: Sheet1
-0.123672	-0.177138	-1424
-0.132734	-0.190154	-1432
-0.192028	0.196624	-1412
0.0917848	0.193299	-1412
0.199847	0.15331	-1414
0.0873048	0.171704	-1416
0.240591	0.214583	-1418
0.0728799	0.10048	-1414
0.198618	0.100958	-1414
0.193675	0.00800268	-1422
0.12022	0.0614283	-1420
0.138287	0.0135797	-1424
0.0827418	0.0870121	-1426
0.241215	0.146691	-1424
0.233576	0.137485	-1426
0.209392	0.112608	-1430
0.246461	0.139197	-1432
0.272961	0.000657585	-1434
0.333054	0.0216941	-1436
0.171036	0.0271533	-1434
0.138798	0.0553177	-1432
0.130365	0.0236482	-1434
0.116013	0.0101864	-1430
0.145867	0.0571602	-1436
0.10055	0.0895494	-1438
0.172674	0.119172	-1440
0.214535	0.118154	-1440
0.173615	0.00207822	-1438
0.259384	0.0449143	-1442
0.192291	0.0949093	-1440
0.180459	0.187629	-1442
0.132008	0.0647038	-1436
0.211903	-0.108042	-1416
0.20461	-0.169043	-1424
0.173123	-0.12849	-1426
0.0439619	-0.0298767	-1430
0.0795927	-0.0455098	-1436
0.214374	-0.152566	-1428
0.200227	-0.140053	-1430
0.230583	-0.205365	-1432
0.228692	-0.128396	-1434
0.345451	-0.156524	-1430
0.336266	-0.0419365	-1436
0.291407	-0.0244795	-1434
0.24513	-0.044753	-1436
0.208924	-0.199558	-1442
0.269602	-0.133713	-1440
0.21376	-0.225142	-1438
0.231115	-0.0161977	-1430
-0.276046	0.194245	-1168
-0.295255	0.000500153	-1168
-0.220745	0.229014	-1176
-0.291988	-0.079726	-1188
-0.0822267	-0.128233	-1174
-0.112892	-0.170125	-1180
-0.0838602	-0.195786	-1182
-0.109402	-0.17916	-1180
-0.0904366	-0.153458	-1184
-0.109142	-0.223101	-1194
-0.143266	-0.0976267	-1198
0.0394639	0.0172714	-1200
0.116238	-0.101878	-1200
0.145567	-0.0206112	-1186
0.239446	0.159291	-1168
0.291203	0.0214663	-1168
0.181881	0.157516	-1174
0.179653	0.0246608	-1178
0.234922	0.0412707	-1178
0.237547	0.135953	-1182
0.147137	0.0644068	-1190
0.22423	0.178224	-1196
0.174276	0.156919	-1196
0.206495	0.1325	-1196
0.204607	0.168503	-1196
0.262485	0.180878	-1200
0.25908	0.142415	-1200
0.215118	0.122941	-1198
0.225418	0.0306384	-1198
0.180688	0.0404317	-1200
0.105759	0.193842	-1198
0.0820622	0.0923912	-1194
0.225773	0.132645	-1194
0.244198	0.138179	-1196
0.0976654	0.101805	-1192
0.303158	0.112099	-1192
0.284579	0.0912054	-1176
0.180475	0.119545	-1170
0.247974	0.16576	-1186
0.116207	0.302439	-1198
0.20676	-0.0182072	-1170
0.32338	-0.0814524	-1172
0.265052	-0.100184	-1176
0.207041	-0.0774512	-1168
0.263837	-0.0541214	-1170
0.201064	-0.185968	-1174
0.230849	-0.2408	-1180
0.326584	-0.0334699	-1176
0.305163	-0.144246	-1180
0.247481	-0.120964	-1186
0.198863	-0.0497733	-1186
0.294179	-0.30874	-1190
0.328949	-0.30707	-1194
0.168298	-0.114575	-1196
0.268616	-0.12403	-1200
0.368625	-0.155007	-1172
-0.147431	-0.176573	-938
-0.056041	-0.0658148	-934
-0.0661572	-0.0784556	-942
-0.139823	-0.20935	-958
-0.133645	-0.174705	-958
-0.10411	-0.161528	-962
0.212828	0.140602	-930
0.249033	0.162448	-932
0.184948	0.143329	-934
0.191337	0.147568	-934
0.159993	0.169978	-934
0.272414	0.0902308	-936
0.177641	0.1527	-938
0.137999	0.104046	-936
0.116719	0.0661171	-932
0.175488	0.117113	-934
0.184915	0.193103	-940
0.190758	0.220988	-940
0.266485	0.180221	-944
0.288019	0.183636	-944
0.335289	0.0954177	-948
0.214359	0.117271	-950
0.123055	0.22186	-946
0.141789	0.0938651	-946
0.208454	0.103895	-942
0.212899	0.136212	-944
0.176851	0.0672987	-950
0.168381	0.0681987	-954
0.131027	0.143151	-954
0.158533	0.0953971	-958
0.0937973	0.140691	-958
0.275764	0.0199918	-942
0.15192	0.0526106	-942
0.0589744	0.184336	-948
0.176234	0.197802	-954
0.193792	0.160271	-956
0.223269	0.173557	-954
0.265964	0.150632	-958
0.289934	0.0529953	-962
0.183149	0.134934	-960
0.161663	0.148777	-954
0.190906	0.113479	-954
0.281306	0.163438	-952
0.207037	0.143975	-962
0.172305	0.0935353	-962
0.153853	0.180503	-960
0.0707655	0.149924	-964
0.215775	0.179424	-960
0.202333	0.0794449	-956
0.132429	0.046352	-944
0.25824	0.0220596	-936
0.160758	0.105036	-966
0.187178	0.10586	-966
0.217919	0.101566	-966
0.0793073	0.0852088	-966
0.148675	0.119009	-958
0.19572	-0.0322616	-930
0.20576	-0.0743267	-936
0.0352152	0.0249176	-932
0.254158	-0.0144477	-934
0.179924	-0.11137	-934
0.201204	-0.144772	-938
0.232701	0.00453421	-938
0.263255	-0.000549602	-942
0.212483	-0.0795892	-948
0.238003	-0.136858	-948
0.171363	-0.0659797	-950
0.133549	0.0328318	-954
0.224245	-0.137043	-960
0.179876	0.0166804	-962
0.135013	0.0440574	-964
0.0930364	0.0549739	-966
0.114456	-0.0462902	-964
0.218273	-0.194442	-962
0.33961	-0.0116447	-962
0.307529	-0.0602363	-960
0.199347	-0.232722	-930
0.240515	-0.304713	-942
0.242741	-0.259797	-944
0.214345	-0.234426	-946
0.193562	-0.243824	-956
0.228389	-0.258759	-958
-0.121521	-0.0817967	-1414
0.118193	0.275257	-1408
0.112069	0.0795561	-1420
0.173279	0.0988817	-1420
0.20586	0.180837	-1420
0.0639528	0.181709	-1432
0.194041	0.215179	-1436
0.220261	0.149787	-1440
0.200326	0.159938	-1438
0.0699724	0.188623	-1438
0.0910817	0.225727	-1442
0.226356	0.158465	-1426
0.257924	-0.0363445	-1410
0.312205	-0.0262786	-1412
0.2764	0.0167744	-1414
0.299598	-0.0599662	-1418
0.208667	-0.00601446	-1420
0.259788	0.018506	-1418
0.146781	-0.0304292	-1422
0.143047	0.0418765	-1430
0.303829	-0.00711821	-1430
0.265593	0.0414403	-1426
0.265205	-0.0769322	-1428
0.233759	0.00393914	-1430
0.278009	0.0212092	-1432
0.200008	0.0406934	-1436
0.219369	0.0535485	-1444
0.272203	0.0331258	-1444
0.244652	0.0183937	-1444
0.195412	-0.0317511	-1410
0.302498	-0.135021	-1434
0.0147257	-0.0667705	-1184
-0.0555839	-0.0516084	-1178
-0.113762	-0.171219	-1174
-0.0969119	-0.204416	-1168
-0.250512	-0.169753	-1168
-0.0650811	-0.148612	-1178
0.225954	0.0579952	-1200
0.25996	0.156216	-1200
0.117651	0.201135	-1198
0.143653	0.205247	-1200
0.157444	0.0513061	-1202
0.0660958	0.168188	-1196
0.152041	0.120405	-1194
0.129807	0.073966	-1190
0.0746583	0.080829	-1184
0.1888	0.123987	-1184
0.20758	0.177833	-1194
0.279304	0.223191	-1196
0.2915	0.0467333	-1190
0.233387	0.0509055	-1192
0.22299	0.19521	-1176
0.261134	0.111886	-1176
0.0771376	0.136232	-1174
0.0940977	0.143359	-1170
0.0960971	0.199639	-1172
0.335213	-0.0766417	-1198
0.318133	-0.139096	-1196
0.173235	-0.100783	-1198
0.248728	-0.0970114	-1192
0.221101	0.00150411	-1188
0.157524	-0.0464309	-1186
0.328635	-0.11528	-1186
0.182372	-0.00432338	-1180
0.129113	-0.0759841	-1178
0.289906	-0.0039379	-1178
0.319002	0.0129021	-1178
0.298463	-0.0413517	-1172
0.325696	-0.173169	-1170
0.341116	-0.15645	-1174
0.365124	-0.26879	-1194
0.362475	-0.307292	-1198
0.349154	-0.272138	-1172
0.218182	-0.238693	-1166
0.245804	-0.317292	-1166
-0.115221	-0.135556	-932
-0.0619261	-0.129415	-940
-0.228006	-0.0465054	-938
-0.204049	-0.171399	-950
-0.137282	-0.222538	-946
-0.0990434	-0.133495	-952
-0.183566	-0.169197	-960
-0.10862	-0.13137	-962
0.00848083	-0.0465124	-958
-0.0833178	-0.137967	-960
0.0890565	0.194616	-960
0.1019	0.171777	-960
0.31378	0.12286	-956
0.174659	0.11592	-954
0.268353	0.187249	-950
0.269553	0.213817	-952
0.257437	0.257273	-956
0.127358	0.106435	-950
0.114561	0.138465	-958
0.182221	0.141073	-950
0.23161	0.170242	-948
0.161603	0.140379	-940
0.229465	0.246505	-938
0.117215	0.120315	-938
0.125213	0.139727	-940
0.165098	0.185012	-942
0.208178	0.136341	-940
0.231823	0.142334	-942
0.225581	0.130852	-942
0.239291	0.149106	-940
0.0662263	0.0916018	-940
0.263274	0.17395	-934
0.217469	0.131441	-934
0.0827413	0.195633	-930
0.0930086	0.0733053	-930
0.154052	0.251251	-930
0.118981	0.412366	-934
0.31847	0.194062	-934
0.252586	0.256544	-932
0.118316	0.111812	-942
0.269886	0.15632	-946
0.279737	0.149464	-944
0.261155	0.14258	-938
0.0927853	0.0211006	-928
0.243919	-0.0962285	-928
0.322599	0.0286856	-930
0.296844	0.0961444	-928
0.226277	0.0739222	-932
0.160383	0.01932	-930
0.136213	-0.0100175	-930
0.280958	0.023463	-936
0.306265	0.0816264	-938
0.100046	-0.00114967	-940
0.103972	0.0549246	-942
0.199847	0.00564318	-950
0.257349	-0.0139502	-950
0.25913	-0.063428	-952
0.124444	0.0433368	-954
0.0807886	0.025496	-950
0.296362	0.0228251	-948
0.246624	0.0764248	-946
0.268665	0.0376306	-956
0.179972	0.0370698	-956
0.302485	0.088279	-958
0.281773	-0.173754	-946
0.177578	-0.192394	-946
0.197084	-0.199916	-946
0.31994	-0.202923	-950
0.229777	-0.192723	-956
0.289428	-0.111861	-958
0.164631	-0.242902	-960
0.350804	-0.159706	-920
0.212784	-0.0931581	-932
-0.349636	0.215355	-806.95
-0.226746	-0.0370418	-812.51
-0.108934	-0.280826	-815.29
-0.0696535	-0.192259	-806.95
-0.0707227	-0.160084	-815.29
-0.14347	-0.243909	-815.29
0.0720179	0.0149406	-809.73
0.170885	-0.368122	-804.17
0.192699	-0.277589	-812.51
0.223733	-0.337195	-804.17
0.264745	-0.197058	-804.17
0.252779	-0.0974421	-815.29
0.26587	-0.226952	-804.17
0.353972	0.0269714	-812.51
0.36614	0.0259768	-812.51
0.35124	0.081278	-806.95
0.141078	0.0569973	-812.51
0.0870877	0.16856	-806.95
0.217844	0.098174	-815.29
0.255905	0.080824	-815.29
0.378208	0.0411843	-884.17
0.349635	-0.0148736	-881.39
0.291279	-0.0191236	-881.39
0.287158	0.0172242	-886.95
0.325187	0.0372589	-881.39
0.269616	-0.0266533	-884.17
0.243896	0.00906038	-886.95
0.204682	-0.0638744	-886.95
0.228296	-0.173904	-886.95
0.20462	-0.316037	-881.39
0.290247	-0.391552	-884.17
0.323322	-0.412534	-881.39
0.177032	0.00599906	-881.39
0.198665	0.0121008	-881.39
0.244386	0.0766071	-884.17
0.258275	0.0954861	-884.17
0.291322	0.0861249	-884.17
0.236645	0.135623	-886.95
0.251365	0.174028	-886.95
0.302441	0.179276	-881.39
0.347306	0.232118	-886.95
0.212657	0.2534	-886.95
0.0995166	0.113811	-886.95
0.0569942	0.00330969	-886.95
-0.0173261	0.0336505	-889.73
-0.146396	-0.154816	-881.39
-0.157366	-0.226565	-884.17
0.153849	0.149818	-884.17
-0.158879	-0.269604	-961.39
-0.262007	-0.041674	-972.51
-0.0982222	-0.208378	-972.51
-0.104215	-0.178833	-969.73
0.108016	-0.223983	-969.73
0.209319	-0.0858923	-969.73
0.248356	-0.146202	-969.73
0.296618	-0.0803129	-961.39
0.32941	-0.0219082	-961.39
0.341217	-0.0571215	-966.95
0.3006	0.0521282	-966.95
0.29248	0.052319	-966.95
0.250196	-0.0226007	-966.95
0.225917	-0.018414	-969.73
0.208134	0.0499231	-966.95
0.176379	0.0570948	-969.73
0.200882	0.0806037	-969.73
0.199628	0.100625	-964.17
0.205273	0.114869	-961.39
0.15662	0.12696	-961.39
0.111414	0.172622	-966.95
0.156171	0.24054	-966.95
0.3593	-0.0399891	-961.39
-0.262797	0.195932	-1049.73
-0.334259	-0.113666	-1049.73
-0.214166	-0.122012	-1049.73
-0.173564	-0.135397	-1046.95
-0.126226	-0.117901	-1044.17
-0.0908083	-0.130391	-1049.73
-0.103536	-0.209901	-1046.95
-0.166788	-0.25903	-1041.39
0.0346993	0.0160307	-1044.17
0.0611561	0.0424371	-1046.95
0.0801084	0.0494671	-1046.95
0.184383	0.0394724	-1041.39
0.207825	0.111064	-1046.95
0.200072	0.14312	-1044.17
0.132578	0.1857	-1049.73
0.143314	0.135401	-1044.17
0.230849	0.130501	-1044.17
0.262307	0.151719	-1046.95
0.256074	0.19209	-1041.39
0.307049	0.041357	-1044.17
0.266394	0.0231079	-1046.95
0.230958	-0.0303496	-1044.17
0.461803	-0.233123	-1049.73
0.376286	0.00586246	-1041.39
-0.283232	-0.148655	-1124.17
-0.267117	0.00119178	-1121.39
-0.112873	-0.268178	-1126.95
0.0648053	-0.124796	-1121.39
0.219731	-0.101658	-1121.39
0.206175	-0.072944	-1121.39
0.276412	0.0536884	-1121.39
0.341785	0.0696897	-1121.39
0.352809	0.0377478	-1121.39
0.356139	-0.0471298	-1121.39
0.208159	0.0811641	-1121.39
0.19684	0.0675319	-1124.17
0.183822	0.0751367	-1124.17
0.184156	0.128126	-1121.39
0.218891	0.1223	-1124.17
0.200466	0.155434	-1121.39
0.228445	0.155027	-1121.39
0.234169	0.18988	-1124.17
0.267043	0.164002	-1121.39
0.194739	0.248744	-1121.39
0.242775	0.278768	-1121.39
0.184989	0.168371	-1121.39
0.13718	0.0631254	-1121.39
0.0926702	0.112504	-1121.39
0.225223	0.0152338	-1121.39
0.229809	0.0649924	-1209.73
0.227674	0.0113633	-1204.17
0.265835	-0.042489	-1206.95
0.25996	-0.0224644	-1206.95
0.273264	-0.0909089	-1201.39
0.277384	-0.173763	-1204.17
0.261241	-0.262347	-1201.39
0.234878	-0.0688573	-1209.73
0.258104	0.181502	-1204.17
0.265056	0.244311	-1209.73
0.221737	0.162806	-1204.17
0.214571	0.143926	-1204.17
0.213563	0.158063	-1204.17
0.210788	0.189298	-1201.39
0.206309	0.121666	-1209.73
0.207428	0.133246	-1204.17
0.175703	0.22	-1204.17
0.157007	0.0891	-1206.95
0.119025	0.0751558	-1209.73
-0.0657532	-0.112584	-1204.17
-0.0943017	-0.11498	-1209.73
-0.102323	-0.245275	-1204.17
-0.153863	-0.214659	-1206.95
-0.237125	-0.227736	-1212.51
-0.0804524	-0.214688	-1289.73
-0.0459213	-0.26588	-1289.73
-0.119459	-0.215926	-1284.17
-0.112914	-0.132391	-1286.95
-0.0591542	-0.000628548	-1286.95
-0.180895	-0.0164114	-1295.29
0.0801822	0.119254	-1286.95
0.0669247	0.0276453	-1286.95
0.121995	-0.0316839	-1284.17
0.171215	-0.053307	-1286.95
0.234487	-0.010077	-1284.17
0.219963	-0.0952191	-1284.17
0.293186	-0.0243318	-1286.95
0.332533	-0.073431	-1281.39
0.419598	-0.116774	-1286.95
0.357099	-0.0430386	-1284.17
0.313397	0.0654805	-1286.95
0.286126	0.174047	-1289.73
0.303191	0.165462	-1289.73
0.311407	0.167704	-1289.73
0.297571	0.230944	-1286.95
0.240787	0.119556	-1284.17
0.251455	0.103135	-1286.95
0.160504	0.249667	-1284.17
0.113671	0.166354	-1286.95
0.118179	0.121886	-1284.17
0.26977	0.187157	-1286.95
-0.427664	-0.145058	-1361.39
-0.205944	-0.183512	-1361.39
-0.10019	-0.0926809	-1372.51
-0.0670348	-0.19284	-1369.73
-0.104292	-0.252813	-1361.39
-0.0343639	-0.231622	-1361.39
-0.195656	0.0723803	-1364.17
-0.116104	-0.1396	-1375.29
0.102724	-0.00684049	-1364.17
0.157426	-0.0836791	-1361.39
0.233861	-0.0802766	-1366.95
0.321522	-0.0653756	-1366.95
0.311781	-0.00702178	-1364.17
0.243212	-0.000421022	-1361.39
0.268743	0.0299947	-1366.95
0.308665	0.0664338	-1364.17
0.345958	0.0754986	-1366.95
0.348624	0.0499416	-1361.39
0.371036	0.158138	-1366.95
0.287658	0.158396	-1366.95
0.285187	0.185418	-1366.95
0.253098	0.204168	-1372.51
0.239107	0.188514	-1369.73
0.217867	0.158139	-1364.17
0.165815	0.073843	-1364.17
0.219732	0.260555	-1361.39
0.29603	-0.0202479	-1444.17
0.312025	0.0733156	-1446.95
0.268062	0.116422	-1444.17
0.241476	0.163594	-1441.39
0.240729	0.195871	-1444.17
0.237622	0.210878	-1444.17
0.208947	0.23494	-1446.95
0.207088	0.224271	-1446.95
0.128997	0.238922	-1444.17
0.104927	0.1738	-1441.39
0.0980012	0.109928	-1444.17
0.210175	-0.149737	-1449.73
0.269994	-0.152414	-1444.17
0.218406	-0.337772	-1446.95
0.224978	-0.250775	-1452.51
0.0372207	-0.0531483	-1444.17
-0.0552135	-0.135488	-1452.51
-0.139869	-0.0292898	-1446.95
-0.102484	-0.223179	-1444.17
-0.239971	-0.183433	-1452.51
-0.275919	-0.143659	-1529.73
-0.151197	-0.155926	-1529.73
-0.0899952	-0.134565	-1526.95
-0.0740244	-0.209914	-1526.95
-0.105836	-0.22088	-1532.51
-0.070318	-0.237579	-1532.51
-0.118044	0.0149034	-1529.73
-0.289353	0.198865	-1529.73
0.066203	0.0127773	-1529.73
0.111036	0.09314	-1526.95
0.105275	0.12438	-1532.51
0.0819744	0.171765	-1529.73
0.111935	-0.0232828	-1529.73
0.169061	0.0166197	-1526.95
0.196184	0.027134	-1529.73
0.218496	-0.0249453	-1526.95
0.179206	-0.13658	-1529.73
0.237195	0.0495972	-1526.95
0.25985	-0.0136221	-1529.73
0.287642	-0.048439	-1529.73
0.339487	-0.0557947	-1532.51
0.347058	-0.0430736	-1529.73
0.389031	-0.110292	-1529.73
0.408846	-0.102672	-1529.73
0.368148	-0.0117037	-1529.73
0.3659	0.0439525	-1526.95
0.311102	-0.00473685	-1532.51
0.322764	-0.143191	-1529.73
0.254623	0.103358	-1526.95
0.194575	0.0914695	-1526.95
0.175445	0.119784	-1526.95
0.304853	0.22449	-1529.73
0.245974	0.242976	-1532.51
0.250343	0.262993	-1532.51
0.228101	-0.289621	-1524.17
-0.0997998	-0.18379	-1584.71
-0.126455	-0.205534	-1584.71
-0.14506	-0.27213	-1584.71
-0.097123	0.000287847	-1584.71
0.0535721	0.050731	-1587.49
0.210652	0.0791078	-1587.49
0.223527	0.201243	-1590.27
0.241082	0.168601	-1587.49
0.218109	0.135119	-1587.49
0.254858	0.130668	-1587.49
0.306066	0.107198	-1587.49
0.390093	0.0543661	-1590.27
0.384469	-0.0572251	-1590.27
0.374864	-0.125603	-1590.27
0.304144	-0.0120866	-1590.27
0.276419	-0.0273319	-1587.49
0.238144	-0.0056678	-1587.49
0.249089	0.0122775	-1587.49
0.270317	0.0296539	-1587.49
0.258217	-0.00369342	-1590.27
0.237892	-0.318623	-1587.49
-0.0694797	0.0231088	-1504.48
0.128095	0.0748129	-1509
0.0582911	0.0586609	-1507.39
0.0923277	0.1213	-1507.35
0.0899816	0.142944	-1503.48
0.140161	0.169481	-1508.71
0.170974	0.114834	-1507.4
0.137478	0.129852	-1508.06
0.201057	0.0918674	-1506.53
0.265421	0.114281	-1508.86
0.289565	0.123213	-1512.58
0.356444	0.0814762	-1509.04
0.264836	0.179632	-1502.03
0.231492	0.214301	-1505.82
0.216253	0.0406787	-1507.07
0.207162	0.0268083	-1503.35
0.258803	0.0376559	-1509.49
0.179339	0.0355973	-1506.99
0.166292	0.0669847	-1507.27
0.126766	0.0199476	-1507.58
0.163886	-0.000257648	-1509.98
0.162536	-0.0885639	-1507.96
0.264836	-0.336592	-1508.24
-0.0338973	-0.161803	-1424.71
0.10969	0.0618748	-1427.49
0.162208	0.0350716	-1430.27
0.153474	0.0615237	-1427.49
0.174695	0.0648378	-1427.49
0.191941	0.0376837	-1424.71
0.200544	0.0762191	-1427.49
0.23767	0.0877678	-1427.49
0.231603	0.13567	-1427.49
0.301959	0.145125	-1430.27
0.241277	0.244381	-1424.71
0.150417	0.233036	-1424.71
0.0868217	0.21751	-1427.49
0.0861983	0.197504	-1427.49
0.0889104	0.168549	-1427.49
0.105012	0.107212	-1430.27
0.183196	0.125954	-1427.49
0.215531	-0.161188	-1427.49
0.236505	-0.028077	-1424.71
0.249479	-0.200731	-1430.27
0.265995	-0.192803	-1427.49
0.391296	-0.102694	-1430.27
0.32443	-0.193782	-1430.27
0.25458	-0.061939	-1430.27
0.216439	0.110659	-1350.27
0.203307	0.128461	-1347.49
0.245061	0.187272	-1347.49
0.202385	0.231903	-1347.49
0.138825	0.149037	-1350.27
0.152691	0.0435018	-1347.49
0.141711	0.0295724	-1347.49
0.179579	0.0398096	-1347.49
0.213296	0.0651082	-1350.27
0.251954	0.0874931	-1350.27
0.262395	-0.199324	-1353.05
0.234519	-0.193217	-1347.49
0.243536	-0.32293	-1350.27
0.0311979	0.0342732	-1347.49
0.184214	0.0924217	-1347.49
-0.0876305	-0.183944	-1347.49
-0.0837991	-0.225821	-1347.49
-0.0536477	-0.157266	-1344.71
-0.190236	-0.138708	-1344.71
-0.186721	0.0300927	-1347.49
-0.247617	0.12939	-1344.71
-0.111449	-0.304901	-1347.49
-0.136481	-0.150616	-1264.71
0.127636	-0.00298661	-1264.71
0.161708	0.00527696	-1267.49
0.169165	0.0158979	-1267.49
0.175671	0.00774326	-1267.49
0.183794	0.0590484	-1270.27
0.179157	0.0924875	-1264.71
0.207828	0.0904562	-1267.49
0.22461	0.0817114	-1264.71
0.260906	0.0554018	-1267.49
0.306243	0.0316354	-1270.27
0.216611	0.229475	-1264.71
0.134444	0.0956278	-1267.49
0.114749	0.0355379	-1267.49
0.0638244	0.0262667	-1267.49
0.0674401	0.0783132	-1270.27
0.262301	-0.175785	-1267.49
0.272368	-0.210176	-1264.71
0.295835	-0.390031	-1267.49
0.284595	0.10378	-1270.27
0.212022	0.0447565	-1267.49
0.0531273	0.00590054	-1187.49
0.096981	-0.0845248	-1187.49
0.145278	0.0346626	-1187.49
0.169363	0.101358	-1187.49
0.183104	0.0973746	-1187.49
0.13716	0.282234	-1187.49
0.248805	0.150262	-1184.71
0.275997	0.149731	-1190.27
0.352263	0.109797	-1187.49
0.263073	0.00886732	-1187.49
0.23556	0.00873799	-1190.27
0.221721	0.00277659	-1190.27
0.237966	-0.0346905	-1190.27
0.25524	-0.0520199	-1187.49
0.303047	0.00999512	-1187.49
0.315261	-0.0179909	-1190.27
0.346338	0.0166417	-1190.27
0.261108	-0.307002	-1187.49
0.337651	-0.262039	-1184.71
-0.301055	0.254292	-1107.49
-0.0655842	-0.146069	-1110.27
-0.00455727	-0.0743196	-1104.71
0.0224353	-0.0243847	-1110.27
0.0811665	0.0812943	-1110.27
0.0862843	0.0128703	-1104.71
0.110729	0.0844945	-1107.49
0.12908	0.0631573	-1107.49
0.157618	0.0507728	-1107.49
0.145496	0.00493179	-1110.27
0.150793	-0.0766286	-1107.49
0.208037	-0.00750307	-1107.49
0.208471	0.055898	-1104.71
0.217979	0.00609469	-1107.49
0.228181	0.0110106	-1104.71
0.227521	-0.0550039	-1104.71
0.283454	-0.0168737	-1107.49
0.271638	-0.075215	-1107.49
0.2564	-0.149331	-1107.49
0.261778	0.103966	-1110.27
0.26858	0.125189	-1110.27
0.234781	0.136041	-1110.27
0.196602	0.215357	-1104.71
0.191267	0.122297	-1104.71
0.150806	0.128044	-1104.71
0.247811	-0.310529	-1104.71
0.0293534	-0.0178169	-1107.49
-0.133951	-0.0251648	-1024.71
-0.204916	-0.00217903	-1024.71
-0.00691153	-0.0970914	-1021.93
-0.0579161	-0.182867	-1024.71
0.0843737	0.0997535	-1027.49
0.0609503	0.0584978	-1024.71
0.0276455	0.0115276	-1027.49
0.0440149	0.234619	-1027.49
0.197268	0.195329	-1027.49
0.242703	0.187627	-1027.49
0.297094	0.168581	-1030.27
0.224369	0.13267	-1027.49
0.198947	0.116928	-1027.49
0.168579	0.120154	-1024.71
0.190275	0.137788	-1027.49
0.192534	0.0206454	-1027.49
0.15161	0.0544054	-1027.49
0.167917	0.0145198	-1027.49
0.21446	-0.115279	-1027.49
0.236094	-0.169766	-1027.49
0.212994	-0.257413	-1027.49
0.27936	-0.0543961	-1027.49
0.278326	0.0234731	-947.497
0.298563	0.0255356	-947.497
0.381511	-0.155633	-947.499
0.283797	-0.194386	-947.496
0.268089	-0.273531	-947.495
0.249726	-0.29523	-944.715
0.227567	-0.28043	-947.494
0.197015	-0.0413166	-944.715
0.16104	-0.0330621	-944.714
0.192063	0.0347802	-947.495
0.220256	0.0446169	-944.716
0.178489	0.0748643	-947.495
0.145576	0.0847525	-947.494
0.12395	0.0572954	-944.713
0.163899	0.139277	-944.715
0.243502	0.142588	-947.497
0.249162	0.171752	-950.277
0.268602	0.148387	-947.498
0.305186	0.1421	-950.278
0.251469	0.0939962	-947.497
0.128445	0.162748	-947.494
0.10372	0.206673	-947.494
0.0890292	0.192261	-947.494
0.0353729	0.165014	-944.712
0.0833141	0.123584	-947.493
0.0789088	0.0588439	-947.492
-0.00857755	0.0532926	-944.71
0.00319585	-0.0570805	-944.71
-0.0763988	-0.131344	-944.707
-0.116604	-0.174748	-944.706
-0.165874	-0.144148	-944.705
-0.102561	-0.205763	-944.706
-0.0892147	-0.26667	-944.706
-0.286033	0.0448013	-941.923
-0.173504	-0.0592118	-864.709
-0.18988	0.107458	-864.709
-0.0815767	0.301579	-864.709
-0.0528654	0.0639196	-867.489
-0.0788651	0.0160252	-867.489
0.013057	0.0390998	-864.709
0.0101398	-0.0246621	-867.489
0.0775579	0.12275	-867.489
0.0943811	0.0987972	-867.489
0.125915	0.0734081	-867.489
0.165284	0.0581458	-867.489
0.137973	-0.0132989	-867.489
0.149001	-0.0140454	-867.489
0.115446	-0.144243	-867.489
0.223199	-0.0258201	-867.489
0.27347	-0.0921413	-867.489
0.278492	-0.280544	-870.269
0.253097	-0.313456	-867.489
0.199519	-0.282762	-867.489
0.204633	0.0943422	-867.489
0.207205	0.13413	-867.489
0.197191	0.151934	-867.489
0.203727	0.218002	-867.49
0.212753	0.23255	-870.269
0.277945	0.158353	-870.269
0.299475	0.148183	-867.49
0.316368	0.168468	-867.49
0.185369	0.0676779	-867.489
-0.163139	-0.204469	-1598.61
-0.00383948	0.272078	-1597.67
0.0922316	0.282213	-1597.67
0.155858	0.212225	-1590.27
0.161713	0.125193	-1593.05
0.141409	0.0524307	-1593.05
0.115145	0.0822517	-1598.61
0.123068	0.0684033	-1593.05
0.106516	0.0696098	-1595.83
0.139356	0.117741	-1593.05
0.118287	0.127761	-1593.05
0.13097	0.140751	-1593.05
0.127703	0.17357	-1593.05
0.117567	0.153888	-1598.61
0.288166	-0.0217979	-1593.05
0.354131	-0.157885	-1598.61
0.195024	0.113104	-1593.05
-0.214723	-0.0100647	-1515.23
-0.148804	-0.245961	-1510.9
0.0439445	0.150873	-1514.19
0.0685739	0.0993741	-1513.58
0.108065	0.145408	-1511.62
0.2564	0.0817321	-1512.3
0.277408	0.0243854	-1512.24
-0.184222	0.134782	-1432.35
-0.107912	-0.125387	-1432.91
-0.208189	0.0931905	-1429.58
-0.240953	-0.267166	-1429.36
-0.140372	-0.188601	-1430.49
0.119675	0.102629	-1431.98
0.152609	0.0379251	-1431.84
0.155841	0.0497776	-1433.57
0.181914	0.101325	-1433.1
0.175262	0.0524366	-1431.02
0.203896	0.0885155	-1429.67
0.22026	0.0732785	-1429.02
0.237315	0.098502	-1431.59
0.259098	0.00807691	-1431.14
0.281765	0.0293835	-1430.82
0.344801	-0.00461076	-1432.46
0.336825	-0.204558	-1430.97
0.269361	-0.17352	-1427.7
0.0907115	0.239461	-1354.06
0.124697	0.184116	-1355.63
0.176684	0.104494	-1356.19
0.197016	0.248187	-1354.52
0.202086	0.106408	-1354.95
0.101336	0.20572	-1353
0.139812	0.221751	-1352.87
0.168197	0.20251	-1349.78
0.175059	0.183293	-1350.47
0.21892	0.0439028	-1355
0.151731	0.0429117	-1352.39
0.160445	0.0462665	-1352.22
0.170981	-0.0388027	-1352.06
0.195197	0.101827	-1354.23
0.199842	0.0682223	-1353.15
0.100283	0.074996	-1349.49
0.11861	0.103809	-1350.84
0.219403	0.0963168	-1350.99
0.230556	0.0913064	-1350.32
0.318182	0.046441	-1358.61
0.298333	0.0643823	-1349.62
0.288718	-0.133364	-1349.24
-0.0846583	-0.141508	-1278.61
-0.133272	-0.195984	-1278.61
-0.096371	-0.187544	-1272.3
0.159686	0.168272	-1278.61
0.161583	0.204312	-1278.61
0.178211	0.165091	-1278.61
0.185511	0.159448	-1278.61
0.210132	0.252117	-1276.41
0.1667	0.0759636	-1278.61
0.179885	0.0136048	-1278.61
0.211542	-0.0360715	-1278.61
0.173818	0.0436654	-1274.41
-0.158625	-0.197974	-1190.29
0.149134	0.1606	-1198.61
0.161583	0.140222	-1198.61
0.182123	0.135849	-1198.61
0.195785	0.138488	-1198.61
0.20455	0.159018	-1198.61
0.103079	0.1251	-1193.93
0.0880613	0.00788866	-1198.61
0.105702	0.00566543	-1198.61
0.122986	0.0439919	-1198.61
0.138875	0.103061	-1198.61
0.163158	0.10777	-1198.61
0.18585	0.0970652	-1198.61
0.220739	0.0264215	-1198.61
0.243596	0.059623	-1198.61
0.134506	0.0872868	-1195.49
0.197884	0.0366283	-1196.88
0.251497	0.0185927	-1196.08
0.170563	0.00658033	-1192.08
0.243414	0.0749365	-1194.39
0.265803	-0.0368595	-1198.61
0.270163	0.0265617	-1198.61
0.302056	-0.162583	-1192.2
0.306821	-0.362608	-1192.06
0.0733722	0.271985	-1118.61
0.107018	0.14225	-1114.24
0.114081	0.272302	-1113.09
0.302115	0.131125	-1113.62
0.168053	0.172474	-1110.23
0.176856	0.184186	-1108.91
0.261836	0.151442	-1109.1
0.277375	0.139464	-1109.87
0.196068	-0.060291	-1118.61
0.2243	0.00835439	-1114.61
0.256682	0.0948397	-1114.51
0.190755	0.0722271	-1114.06
0.210579	-0.0649448	-1114.37
0.236383	0.064014	-1112.84
0.0181254	0.049117	-1101.93
0.150379	0.102395	-1107.29
0.211243	0.102813	-1107.96
0.25759	-0.0692344	-1108.07
0.2911	0.113945	-1106.97
0.178794	0.103548	-1104.44
0.3043	0.105605	-1103.83
0.141667	0.063134	-1101.93
0.323139	0.134191	-1107.13
0.0279372	0.15082	-1036.6
0.0126717	0.0335032	-1036.86
0.0600337	0.0269975	-1031.82
0.033612	0.0295936	-1029.8
0.224327	0.222282	-1032.38
0.225793	-0.0458304	-1038.61
0.191055	0.0760189	-1035.69
0.171581	0.0386467	-1033.07
0.171762	0.0251101	-1034.01
0.184529	0.114901	-1031.73
0.23522	0.0308869	-1030.31
0.306729	0.101594	-1030.54
0.312871	-0.00187411	-1031.27
0.349457	0.051688	-1031.3
0.232366	0.198127	-1027.41
0.223218	0.135447	-1025.21
0.237914	0.132905	-1025.57
0.309101	0.130306	-1023.57
0.189314	-0.00861004	-1021.93
0.260219	0.082538	-1021.93
0.346638	0.0863414	-1024.95
0.362728	-0.257197	-1021.93
-0.220159	0.0462966	-953.953
0.0774804	0.282269	-958.61
0.116856	0.167921	-958.61
0.135413	0.151454	-955.457
0.250288	0.186537	-952.462
0.172087	0.175406	-950.181
0.158236	0.0701805	-958.61
0.168286	0.0902121	-958.61
0.181582	0.0208406	-958.61
0.230018	0.0602243	-958.61
0.240147	0.0299117	-958.61
0.282249	0.0902201	-955.59
0.156542	0.0506354	-950.72
0.278511	0.00851499	-950.906
0.256269	-0.209713	-958.61
0.235699	-0.296498	-955.177
0.279603	-0.104173	-951.728
0.300176	0.173853	-948.942
0.300932	0.0744859	-951.754
0.310846	0.0862478	-952.968
0.30116	0.128845	-949.121
0.316394	0.156388	-950.433
0.373701	-0.20158	-958.61
0.340252	-0.144319	-956.601
0.237846	0.120804	-947.597
0.273751	0.148986	-947.739
0.364411	-0.339867	-944.337
-0.0949347	-0.175005	-869.966
0.0770116	0.280484	-878.61
0.0809215	0.243617	-878.61
0.129527	0.226841	-878.61
0.180305	0.210094	-878.61
0.115581	0.196166	-872.67
0.229472	0.223586	-869.512
0.0941085	0.0140084	-878.61
0.144918	0.0469835	-878.61
0.170873	0.0711101	-878.61
0.189912	0.0765756	-878.61
0.206987	-0.0804685	-878.61
0.210514	0.0221444	-878.61
0.122989	0.102511	-874.282
0.144561	0.0834461	-873.563
0.132139	0.0563713	-871.14
0.184162	0.111189	-871.191
0.242908	0.205479	-870.456
0.265847	0.0701681	-878.61
0.283892	0.0746282	-878.61
0.285214	0.041428	-872.333
0.274039	-0.187447	-878.61
0.316907	-0.13073	-878.61
0.318325	-0.116902	-878.61
0.31009	-0.42688	-878.61
-0.100888	-0.137919	-1585.8
-0.239866	-0.140037	-1591.89
0.122897	0.229487	-1597.3
0.0577089	0.0550373	-1590.72
0.161952	0.121854	-1591.18
0.217458	0.00987376	-1590.31
0.293794	0.013336	-1592.95
0.269795	-0.00919892	-1513.05
0.313922	-0.16785	-1513.05
0.288305	-0.164875	-1515.83
-0.176526	-0.184106	-1433.05
0.225076	0.118382	-1430.27
0.127269	0.188861	-1435.83
0.310066	0.0851847	-1435.83
0.00851818	0.0753349	-1344.71
0.211589	0.171086	-1350.27
0.163276	0.0745625	-1350.27
0.174965	0.0771532	-1350.27
0.112149	0.0977132	-1355.83
0.280004	0.0568732	-1347.49
0.128423	0.0718891	-1275.83
0.168966	0.00173268	-1275.83
0.211204	-0.0885859	-1273.05
-0.104211	-0.212359	-1273.05
-0.124968	-0.164465	-1273.05
-0.207475	-0.26437	-1195.83
0.199931	0.0492156	-1193.05
0.186031	0.0257491	-1190.27
0.287055	-0.0577728	-1193.05
0.208559	0.00553764	-1195.83
0.201383	-0.0619756	-1195.83
0.169185	-0.00959179	-1115.83
0.152877	-0.0537431	-1110.27
0.18216	0.0790898	-1110.27
-0.163651	-0.289351	-1113.05
-0.118863	-0.12858	-1110.27
0.259215	-0.0123051	-1118.61
0.164122	0.0829513	-1110.27
-0.188227	-0.193901	-1033.05
-0.0618187	-0.192622	-1027.49
0.256201	-0.123469	-1033.05
0.245508	-0.0359338	-1035.83
0.206461	0.0625644	-1033.05
0.152597	0.155361	-1030.27
0.27105	-0.142796	-1033.05
0.178238	0.120976	-950.27
0.332515	-0.196551	-950.27
0.319435	-0.215997	-947.49
0.215505	-0.0526254	-950.27
0.236242	0.0357061	-953.05
0.171445	0.0558818	-953.05
0.163191	0.0472622	-955.83
0.137944	0.0506577	-955.83
0.142715	0.158059	-953.05
0.0684031	0.176908	-873.05
0.116609	0.154109	-873.05
0.194281	0.0623936	-870.27
0.220766	-0.0818604	-873.05
0.350511	0.22862	-1598.38
0.220864	-0.287468	-1598.38
0.295904	0.0931318	-1598.38
0.246309	0.00448164	-1598.38
0.246078	-0.102826	-1598.38
0.237765	0.101738	-1598.38
0.206114	0.0380175	-1598.38
0.193403	0.0594235	-1598.38
0.182707	0.113668	-1598.38
0.177236	0.0675691	-1598.38
0.332732	0.221303	-1598.38
0.313335	0.184066	-1598.38
0.309921	0.241099	-1598.38
0.274394	0.160705	-1598.38
0.247072	0.132728	-1598.38
0.208178	0.153917	-1598.38
0.200845	0.214131	-1598.38
0.197271	0.202981	-1598.38
0.186104	0.307135	-1598.38
0.178213	0.317893	-1598.38
0.170082	0.042702	-1598.38
0.164384	0.0022425	-1598.38
0.160286	0.0849939	-1598.38
0.128837	0.0807678	-1598.38
0.112922	0.09752	-1598.38
0.112389	0.0488256	-1598.38
0.100646	0.107812	-1598.38
0.077483	0.0581767	-1598.38
0.0333116	0.0112385	-1598.38
0.167339	0.195901	-1598.38
0.136313	0.172704	-1598.38
0.0979826	0.192431	-1598.38
0.0897543	0.130655	-1598.38
0.0829408	0.214889	-1598.38
0.0825818	0.141022	-1598.38
0.150942	0.349072	-1598.38
0.120992	0.351373	-1598.38
-0.11763	-0.183532	-1598.38
-0.0913766	-0.142702	-1598.38
-0.140533	-0.111282	-1598.38
-0.140804	-0.145081	-1598.38
0.380361	0.0419047	-1518.38
0.360032	0.0201293	-1518.38
0.269956	-0.341471	-1518.38
0.314263	0.0793039	-1518.38
0.271684	0.0750685	-1518.38
0.263943	-0.014616	-1518.38
0.263537	-0.0234712	-1518.38
0.258613	0.035796	-1518.38
0.248235	-0.194043	-1518.38
0.246381	-0.0869311	-1518.38
0.199175	-0.0412022	-1518.38
0.187472	0.0749347	-1518.38
0.334153	0.194544	-1518.38
0.299638	0.182132	-1518.38
0.260448	0.139167	-1518.38
0.257531	0.157406	-1518.38
0.231341	0.151631	-1518.38
0.230909	0.126288	-1518.38
0.226932	0.136374	-1518.38
0.21417	0.178621	-1518.38
0.207057	0.122805	-1518.38
0.201291	0.22401	-1518.38
0.189955	0.202536	-1518.38
0.179315	0.173085	-1518.38
0.170495	-0.0189612	-1518.38
0.141656	0.0588401	-1518.38
0.170453	0.265023	-1518.38
0.165952	0.257854	-1518.38
0.155592	0.2834	-1518.38
0.148488	0.157416	-1518.38
0.0975898	0.209904	-1518.38
0.090932	0.156128	-1518.38
0.0854405	0.130337	-1518.38
0.0851448	0.209948	-1518.38
0.0748149	0.241022	-1518.38
-0.0908167	-0.229884	-1518.38
-0.0487854	-0.155951	-1518.38
-0.0649527	-0.144749	-1518.38
-0.0901445	-0.163896	-1518.38
0.251612	-0.275709	-1428.96
0.245128	0.0093081	-1434.41
0.201226	0.0895946	-1435.31
0.190891	0.0919422	-1435.68
0.19087	0.075259	-1434.97
0.245512	0.0717109	-1433.31
0.191998	-0.0278495	-1433.08
0.253206	0.107383	-1428.36
0.222812	-0.0980586	-1430.15
0.191477	0.00405438	-1429.38
0.182291	0.0812719	-1429.96
0.195791	0.145516	-1438.38
0.225466	0.151663	-1436.33
0.206545	0.219087	-1436.67
0.300225	0.226508	-1431.93
0.231171	0.158506	-1431.7
0.215484	0.1428	-1432.84
0.264084	0.174777	-1429.93
0.259518	0.150148	-1429.29
0.237645	0.177118	-1429.85
0.172501	0.0746838	-1433.99
0.171494	0.09155	-1434.37
0.162148	0.101329	-1434.08
0.151842	0.130263	-1435.72
0.146617	0.0915932	-1436.72
0.142539	0.111471	-1435.48
0.132286	0.109407	-1434.49
0.130805	0.0893458	-1433.74
0.129114	0.100983	-1434.46
0.105624	0.0448191	-1435.05
0.0375769	0.0533608	-1434.76
0.151325	0.0178566	-1433.19
0.135215	-0.00716738	-1431.42
0.106461	0.103132	-1432.05
0.0796322	0.0382018	-1432.66
0.170669	0.125301	-1429.96
0.164699	0.269453	-1438.38
0.164863	0.219641	-1438.38
0.163916	0.260856	-1438.38
0.121451	0.251713	-1438.38
0.0875061	0.214004	-1438.38
0.146687	0.182567	-1434.26
0.12696	0.258066	-1435.62
0.170317	0.192981	-1430.74
0.15848	0.180397	-1432.2
-0.129601	-0.173558	-1435.73
-0.000992297	-0.117603	-1428.99
-0.0314751	-0.0216378	-1434.43
-0.0353407	-0.0300259	-1433.83
-0.131159	0.0187009	-1432.15
-0.153967	-0.0673905	-1432.66
0.210181	-0.270743	-1358.38
0.298526	0.0835053	-1358.38
0.287719	-0.0381322	-1358.38
0.28316	-0.0561176	-1358.38
0.268211	0.0802642	-1358.38
0.262826	-0.0336512	-1358.38
0.259588	0.0872824	-1358.38
0.241528	-0.0799584	-1358.38
0.207556	0.0968498	-1358.38
0.207782	0.0592468	-1358.38
0.2013	0.0840754	-1358.38
0.181822	0.0799443	-1358.38
0.155095	0.0157837	-1358.38
0.250678	-0.0413769	-1356.13
0.221161	0.0506493	-1354.95
0.179582	0.049269	-1356.22
0.155945	0.0560027	-1355.19
0.224678	0.0549299	-1353.07
0.197507	-0.135223	-1351.07
0.189009	-0.0239397	-1352.27
0.179427	0.00136506	-1351.25
0.217883	0.000152504	-1348.6
0.275441	0.151928	-1358.38
0.243485	0.173212	-1358.38
0.218496	0.108073	-1358.38
0.212935	0.208916	-1358.38
0.188963	0.185844	-1358.38
0.174808	0.138583	-1358.38
0.172981	0.185084	-1358.38
0.162261	0.161307	-1358.38
0.154105	0.134415	-1358.38
0.226978	0.190208	-1352.96
0.18326	0.112222	-1353.11
0.160686	0.192299	-1352.6
0.158945	0.28198	-1352.44
0.146351	0.0142574	-1358.38
0.135862	0.00840086	-1358.38
0.129639	0.0894664	-1358.38
0.124557	0.0507629	-1358.38
0.0750713	0.0979195	-1358.38
0.114336	0.019432	-1352.06
0.14642	0.0793504	-1348.58
0.139887	0.0202856	-1347.8
0.149834	0.171563	-1358.38
0.135404	0.15007	-1358.38
0.119734	0.275239	-1358.38
0.111704	0.262497	-1358.38
0.111209	0.276336	-1358.38
0.101106	0.250912	-1358.38
0.0991483	0.241017	-1358.38
0.0843661	0.118349	-1358.38
0.0826512	0.134269	-1358.38
0.134709	0.251597	-1351.61
-0.0885898	-0.000311275	-1353.38
-0.14751	0.267596	-1353.03
-0.157373	-0.187333	-1344.6
0.238461	-0.193171	-1275.87
0.236836	-0.202481	-1274.86
0.227467	-0.151532	-1270.63
0.222045	-0.175855	-1271.2
0.241673	0.0806488	-1278.38
0.218346	0.101395	-1278.38
0.212624	0.102838	-1278.38
0.191213	0.0601428	-1272.87
0.266077	0.043033	-1268.66
0.213678	0.0802502	-1268.69
0.2627	0.154503	-1278.38
0.239483	0.189998	-1278.38
0.225553	0.141913	-1278.38
0.194706	0.195056	-1278.38
0.184552	0.308152	-1278.38
0.181043	0.220696	-1278.38
0.225225	0.179335	-1272.37
0.187918	0.209391	-1273.04
0.18667	0.181362	-1271.95
0.274736	0.251793	-1268.23
0.200637	0.181171	-1269
0.183099	0.0198477	-1278.38
0.173781	0.0800204	-1278.38
0.167048	0.0802788	-1278.38
0.14622	0.0719763	-1278.38
0.143709	0.036026	-1278.38
0.141012	0.0730469	-1274.76
0.110926	0.0719497	-1275.44
0.173576	0.102448	-1268.92
0.15197	0.0745863	-1269.75
0.087318	0.0984594	-1268.37
0.176563	0.257941	-1278.38
0.15176	0.155773	-1278.38
0.137947	0.231965	-1278.38
0.0879831	0.248795	-1278.38
0.0920845	0.179646	-1271.08
0.121634	0.228798	-1269.08
-0.0665629	-0.109273	-1278.38
-0.0809004	-0.110869	-1278.38
-0.141563	0.0760269	-1274.37
-0.0904936	0.228073	-1278.38
-0.168715	-0.243506	-1278.38
-0.17911	-0.2365	-1275.84
-0.208337	0.202552	-1278.38
-0.220673	0.206342	-1272.64
0.336854	-0.0732563	-1265.1
0.260124	-0.0817052	-1266.77
0.0685437	0.0790699	-1262.18
0.334127	0.0922044	-1189.1
0.320965	0.205842	-1190.44
0.194636	-0.14136	-1191.44
0.270129	0.105159	-1198.38
0.196354	0.113011	-1198.38
0.175487	0.0509772	-1198.38
0.226866	0.0260253	-1194.76
0.237391	0.0929187	-1192.36
0.214597	0.0685232	-1192.82
0.280572	0.174924	-1198.38
0.250538	0.279848	-1198.38
0.25422	0.176274	-1198.38
0.247278	0.207366	-1198.38
0.239944	0.329911	-1198.38
0.226546	0.334651	-1198.38
0.209692	0.174739	-1198.38
0.204377	0.154408	-1198.38
0.185177	0.193374	-1198.38
0.173752	0.19335	-1198.38
0.164944	0.209525	-1198.38
0.161386	0.15647	-1194.34
0.167421	0.142556	-1190.3
0.146569	0.333601	-1192.25
0.148147	0.045484	-1198.38
0.142784	0.114655	-1198.38
0.134032	0.0560036	-1198.38
0.0260937	0.0573298	-1195.76
0.000691451	-0.0585367	-1190.53
-0.132025	-0.237091	-1198.38
-0.141204	-0.168012	-1193.34
-0.0188952	0.0598462	-1198.38
-0.085171	-0.14194	-1198.38
-0.100154	-0.142411	-1198.38
-0.112299	-0.137103	-1198.38
-0.129592	-0.0494162	-1198.38
-0.189902	-0.111785	-1196.32
0.368521	-0.107115	-1111.18
0.206152	-0.324901	-1113.99
0.264252	-0.158733	-1113.42
0.278656	-0.160112	-1108.9
0.226049	-0.0121171	-1116.29
0.225568	0.0732187	-1115.53
0.21117	-0.0546199	-1115.89
0.207618	0.071071	-1114.88
0.260665	-0.0361444	-1110.98
0.171603	0.0300062	-1111.69
0.255493	0.00441124	-1109.55
0.196819	-0.00864049	-1109.89
0.227911	0.261246	-1118.38
0.190354	0.149876	-1118.38
0.327761	0.132001	-1116.34
0.265099	0.213495	-1116.56
0.23026	0.173877	-1116.03
0.223687	0.14566	-1114.36
0.213655	0.320512	-1115.35
0.184941	0.13378	-1116.28
0.279093	0.333892	-1113.46
0.224639	0.192049	-1111.47
0.201717	0.238337	-1111.85
0.280304	0.152347	-1109.69
0.238758	0.226332	-1109.91
0.146259	0.0373046	-1114.61
0.0907662	0.0998468	-1116.22
0.153074	0.26884	-1115.5
0.150104	0.258755	-1116.33
0.135706	0.224218	-1115.29
0.126952	0.11362	-1113.7
0.114714	0.11642	-1116.73
0.0934765	0.122203	-1115.16
0.0855755	0.242725	-1113.21
0.0655843	0.177715	-1112.43
-0.185328	-0.195605	-1118.38
-0.106767	-0.222093	-1110.32
-0.0351738	-0.131879	-1113.37
-0.193816	-0.188081	-1115.19
0.349718	-0.623992	-1034.35
0.352301	-0.137475	-1038.38
0.286611	-0.29885	-1038.38
0.300721	0.0885136	-1038.38
0.2713	0.0627743	-1038.38
0.26468	-0.0830162	-1038.38
0.257441	-0.0585307	-1038.38
0.224098	0.0102034	-1038.38
0.221516	0.0394193	-1038.38
0.212583	0.0584534	-1038.38
0.197063	0.0645671	-1038.38
0.260287	-0.0438556	-1036.52
0.194347	0.0136106	-1031.68
0.311039	0.166003	-1038.38
0.262465	0.13929	-1038.38
0.261208	0.190837	-1038.38
0.259401	0.103896	-1038.38
0.256873	0.163975	-1038.38
0.241884	0.292124	-1038.38
0.229518	0.157559	-1038.38
0.221666	0.0976446	-1038.38
0.199277	0.131476	-1038.38
0.171187	0.264244	-1038.38
0.228694	0.113003	-1032.4
0.20263	0.26134	-1030.48
0.19281	0.266443	-1030.62
0.170367	0.320247	-1030.15
0.164008	0.0151028	-1038.38
0.159394	-0.0223605	-1038.38
0.148736	-0.0116092	-1038.38
0.126028	0.054882	-1038.38
0.165821	0.0489574	-1034.96
0.149892	0.0588324	-1036.12
0.0659049	0.0259506	-1030.64
0.0981239	0.0963785	-1038.38
0.115966	0.244681	-1032.27
-0.0831538	-0.175309	-1038.38
-0.0858799	-0.15283	-1038.38
-0.0283833	-0.112572	-1034.68
-0.124097	-0.0533919	-1033.11
-0.0753023	0.199937	-1038.38
-0.0935627	0.19627	-1038.38
-0.102844	0.190366	-1038.38
-0.108808	0.1967	-1038.38
0.303161	-0.116121	-958.38
0.268558	-0.186162	-958.38
0.213531	0.000237172	-958.38
0.208936	0.0537998	-958.38
0.143682	0.00902712	-958.38
0.277787	-0.00341768	-953.163
0.220472	-0.0304071	-953.362
0.264483	0.14736	-958.38
0.216616	0.230672	-958.38
0.215493	0.113061	-958.38
0.209431	0.130706	-958.38
0.166058	0.215524	-958.38
0.15237	0.0615772	-958.38
0.147467	0.258148	-958.38
0.269023	0.199691	-953.861
0.223769	0.175069	-953.635
0.196569	0.160249	-954.635
0.024318	-0.086825	-958.38
0.0225609	0.0344725	-958.38
0.00797255	-0.0792962	-954.329
0.127887	0.184164	-958.38
0.12219	0.13742	-958.38
0.110423	0.239108	-958.38
0.103225	0.161543	-958.38
0.0750417	0.242765	-958.38
0.123319	0.211768	-954.792
0.074073	0.259129	-952.579
0.0689387	0.148283	-953.062
-0.091498	-0.205988	-952.886
-0.0465114	-0.102472	-958.38
-0.0467731	-0.111548	-958.38
-0.0946889	-0.166876	-955.285
-0.163582	0.0423796	-958.38
-0.274178	0.236515	-958.38
0.319848	0.238588	-878.38
0.211881	-0.291042	-878.38
0.290363	0.0388671	-878.38
0.268972	-0.0947073	-878.38
0.264202	-0.0392761	-878.38
0.250228	-0.0651558	-878.38
0.223759	0.0849287	-878.38
0.177645	0.0832775	-878.38
0.173853	0.0722273	-878.38
0.169628	0.0590665	-878.38
0.155019	0.0486353	-878.38
0.159429	0.0187256	-874.983
0.280897	0.123251	-872.597
0.273171	-0.00220031	-872.702
0.266984	-0.0685142	-872.704
0.2042	0.116982	-872.584
0.211626	-0.11477	-872.983
0.200244	0.0218383	-872.774
0.269251	0.314785	-878.38
0.257103	0.23195	-878.38
0.242186	0.238722	-878.38
0.23786	0.167089	-878.38
0.218517	0.234482	-878.38
0.217114	0.158723	-878.38
0.19888	0.217378	-878.38
0.185962	0.174392	-878.38
0.181099	0.150289	-878.38
0.233777	0.265947	-876.563
0.21029	0.153288	-873.869
0.256082	0.200504	-871.306
0.223189	0.207669	-871.56
0.224697	0.126681	-872.55
0.160541	0.266905	-872.73
0.131813	0.0333981	-878.38
0.121271	0.0873509	-878.38
0.0907812	0.0818765	-878.38
0.0892746	0.0490752	-878.38
0.0769921	0.0684524	-878.38
0.130338	0.223322	-878.38
0.111738	0.258852	-878.38
0.111139	0.127401	-878.38
0.134439	0.201088	-872.48
-0.11582	-0.242276	-875.323
-0.0834432	-0.115144	-878.38
-0.102255	-0.0640907	-870.881
-0.0288711	0.0744798	-878.38
-0.0611074	0.115399	-878.38
-0.281692	0.234714	-878.38
