# Supplementary material for: Spinal premotor interneurons controlling antagonistic muscles are spatially intermingled
Source: eLife. 2022 Dec 13;11:e81976. doi: 10.7554/eLife.81976 (PMC9844990; doi:10.7554/eLife.81976)
Supplement: Figure 3—figure supplement 1—source data 10. [file elife-81976-fig3-figsupp1-data10.xlsx]

## Sheet: Sheet1
0.0158922	-0.00800717	-692
-0.0429487	-0.0595596	-696
-0.182175	-0.151094	-692
-0.0730701	-0.16645	-702
-0.1749	-0.176242	-702
0.0474054	0.020788	-698
-0.140151	-0.0633141	-720
-0.114341	-0.169997	-726
0.218216	0.191613	-688
0.195128	0.196724	-688
0.189546	0.111219	-694
0.252025	0.142344	-692
0.269043	0.117525	-694
0.196038	0.142106	-696
0.223788	0.195245	-700
0.236771	0.203129	-700
0.245413	0.171645	-698
0.2459	0.240912	-704
0.234374	0.0352622	-702
0.100549	0.112982	-704
0.154732	0.101396	-706
0.187979	0.11338	-710
0.115923	0.18061	-714
0.103036	0.191965	-708
0.163354	0.176633	-712
0.146577	0.202141	-714
0.25419	0.0264352	-716
0.29108	0.0368713	-716
0.309861	0.0214316	-716
0.112055	0.236399	-720
0.0550978	0.0846845	-720
0.0903642	0.080838	-720
0.123445	0.0424418	-720
0.190255	0.139532	-724
0.196791	0.145922	-726
0.214653	0.130521	-726
0.227013	0.114989	-724
0.0946148	0.101319	-726
0.086425	0.0918411	-726
0.074904	0.143041	-722
0.223793	0.141708	-716
0.0475511	0.0996797	-696
0.0987901	0.0227726	-698
0.208523	0.107319	-702
0.183959	0.0523033	-692
0.190034	0.207428	-694
0.197068	-0.0347565	-700
0.164972	-0.0290327	-704
0.142809	0.00169338	-706
0.223622	-0.0545024	-714
0.220693	-0.0437828	-718
0.203419	-0.0272014	-726
0.254577	-0.105932	-728
0.286196	0.0216922	-734
0.304113	-0.000490391	-738
0.272796	-0.277033	-728
0.229018	-0.323888	-716
0.286739	-0.289921	-710
0.245116	-0.284036	-706
0.199263	-0.15537	-706
0.362813	-0.1279	-708
0.277072	-0.17425	-714
0.273514	-0.204961	-712
-0.116155	0.000252417	-448
-0.198579	-0.123613	-456
-0.154109	-0.185371	-456
-0.0824636	-0.117931	-478
0.0987078	0.0357527	-478
0.306441	-0.00337851	-446
0.314204	0.097349	-446
0.129181	0.232897	-450
0.306412	0.141658	-452
0.304035	0.111801	-448
0.187826	0.0309956	-450
0.234533	0.103711	-452
0.190123	0.144376	-454
0.175136	0.195222	-454
0.222987	0.00289956	-462
0.217695	0.0186789	-462
0.170235	0.0843398	-460
0.212823	0.0721331	-458
0.203268	0.12784	-462
0.183152	0.124396	-464
0.139474	0.141645	-466
0.106798	0.0559007	-466
0.0942668	0.0894399	-470
0.0978859	0.116934	-470
0.176171	0.0253906	-478
0.160976	0.00575382	-478
0.107139	0.0801134	-480
0.135429	0.0459464	-478
0.188236	0.105044	-474
0.17118	0.107148	-480
0.220834	0.0134364	-480
0.222656	0.0455905	-478
0.254703	0.0716736	-474
0.254555	0.232891	-470
0.259179	0.174964	-470
0.247336	0.087207	-470
0.256778	0.0840485	-470
0.162363	0.163676	-474
0.259778	0.021792	-474
0.166086	0.0353449	-472
0.283508	0.137587	-472
0.122428	0.150033	-478
0.100297	0.189889	-480
0.176012	-0.0441989	-474
0.138791	0.105342	-450
0.151545	0.100067	-446
0.0997326	0.101038	-448
0.12126	0.0504576	-448
0.0905337	0.1145	-452
0.116987	0.175255	-450
0.156233	0.201093	-464
0.123146	0.229441	-462
0.216234	0.205164	-460
0.287895	-0.0155075	-460
0.310744	0.0240444	-466
0.381018	-0.00880225	-464
0.0981285	0.0544898	-456
0.399985	-0.0659457	-472
0.215992	-0.283406	-472
0.202456	-0.244567	-474
0.199609	-0.275323	-476
0.143336	-0.0992065	-478
0.230449	-0.0524316	-470
0.279409	-0.148098	-466
0.235197	-0.26109	-452
0.234434	-0.28916	-448
0.241004	-0.290157	-460
0.280805	-0.255039	-458
0.3601	-0.292655	-460
0.0906741	0.0842104	-208
-0.224857	0.0867301	-208
-0.160941	-0.141021	-214
0.0996203	0.089319	-216
0.0515483	0.0141391	-222
0.0777908	0.0225763	-232
0.0439796	0.0269452	-232
-0.104164	-0.129217	-232
-0.168996	-0.0555008	-234
-0.242038	-0.0189009	-240
-0.163386	0.102688	-240
-0.132224	-0.137931	-244
-0.10196	-0.0919542	-238
-0.0914555	-0.155507	-234
-0.0837716	-0.137777	-236
-0.0976618	-0.166911	-232
-0.0987738	-0.199658	-238
0.0332502	0.0294263	-242
-0.13254	-0.145305	-218
0.088926	-0.0192862	-224
0.226425	0.117058	-204
0.238051	0.0966313	-206
0.242113	0.155692	-208
0.146325	0.189063	-212
0.0810267	0.182298	-216
0.123463	0.19955	-212
0.264353	0.192492	-210
0.274913	0.21765	-210
0.294824	0.231072	-208
0.188591	0.0967083	-210
0.169126	0.111233	-212
0.263562	0.231342	-214
0.220489	0.234563	-220
0.20977	0.113213	-218
0.308002	0.242268	-220
0.25976	0.156224	-222
0.206489	0.151446	-230
0.238822	0.176142	-238
0.187459	0.140852	-236
0.203939	0.0966082	-230
0.118399	0.139133	-228
0.0611607	0.108235	-226
0.137053	0.180672	-230
0.115098	0.071258	-220
0.136186	0.314581	-232
0.0334055	0.207556	-242
0.0394113	0.184209	-236
0.228749	0.0786242	-236
0.188802	0.158789	-240
0.0249652	0.0503151	-210
0.149235	0.0455302	-218
0.327187	0.13562	-240
0.313688	-0.116033	-208
0.327187	-0.0640921	-210
0.215871	-0.0935415	-214
0.265465	0.00777458	-212
0.194282	0.0208889	-218
0.205382	0.0170979	-216
0.302763	0.0207733	-214
0.374869	0.00490053	-220
0.196776	-0.0540059	-224
0.292194	0.012783	-244
0.170519	-0.0761277	-246
0.176304	-0.147093	-240
0.232145	-0.16238	-238
0.14392	0.062813	-238
0.140184	0.00827542	-236
0.172592	0.00017722	-230
0.275599	0.0379328	-224
0.259895	-0.145744	-218
0.320871	0.0186621	-238
0.145353	-0.184979	-244
0.285206	-0.231257	-242
0.279541	-0.211663	-240
0.286664	-0.202378	-242
0.227772	-0.245427	-236
0.197653	-0.239687	-236
0.300319	-0.328551	-230
0.213647	-0.291358	-224
0.277688	-0.26986	-216
0.226861	-0.190951	-218
-0.0944581	-0.066367	-2
-0.235863	0.10003	-4
0.204469	0.0317211	-2
0.173776	0.0542103	-4
0.218591	0.130496	-2
0.196682	0.173866	-6
0.130336	0.220137	-4
0.136346	0.232689	-2
0.206936	-0.0289695	-2
-0.0802826	-0.134581	-714
-0.12265	-0.158705	-710
-0.154401	-0.144983	-700
-0.0440371	-0.104055	-702
-0.110524	-0.144444	-694
-0.143181	-0.207978	-716
-0.0875789	-0.180606	-716
-0.158047	-0.185431	-714
0.0740287	0.16719	-690
0.0803958	0.182456	-694
0.0820135	0.131993	-696
0.0654212	0.126376	-696
0.257468	0.202887	-698
0.222345	0.136644	-700
0.107119	0.104262	-688
0.236452	0.205143	-690
0.180935	0.0655704	-690
0.191161	0.111622	-692
0.262355	0.0786073	-692
0.222619	0.0955705	-698
0.246017	0.0801645	-700
0.267406	0.106844	-702
0.213205	0.173805	-706
0.246258	0.147505	-708
0.26959	0.0895013	-708
0.207423	0.16337	-710
0.0866545	0.18788	-698
0.257572	0.176986	-702
0.0712979	0.0951246	-706
0.0604548	0.128532	-714
0.127461	0.182649	-716
0.085848	0.087425	-716
0.0891683	0.0645455	-716
0.232604	0.122237	-714
0.212889	0.119861	-714
0.305651	0.177878	-714
0.196485	0.158645	-720
0.205984	0.182576	-722
0.233651	0.118477	-722
0.203956	0.0852688	-720
0.247257	-0.100661	-692
0.258723	-0.0280037	-690
0.131342	-0.090992	-696
0.144553	-0.107044	-700
0.253634	-0.0282632	-698
0.166706	-0.0545899	-708
0.224699	0.0215817	-708
0.251917	-0.00324092	-712
0.155094	-0.0131633	-714
0.19349	-0.0897076	-710
0.243579	-0.0348648	-716
0.203102	0.0254016	-722
0.142251	-0.0189464	-722
0.18102	-0.226944	-698
0.209743	-0.21627	-710
0.241796	-0.248093	-716
0.22011	-0.234564	-716
0.281145	-0.0521342	-720
0.28762	-0.0583432	-714
0.302496	-0.0662093	-714
-0.170135	0.025182	-694
0.26501	0.00137756	-718
0.277589	0.00796587	-714
0.305684	0.0172361	-718
-0.12504	0.347986	-478
-0.0724313	-0.122745	-450
-0.0725495	-0.0528408	-450
-0.0334441	-0.101207	-452
0.0699888	0.0252359	-452
-0.273785	-0.00290196	-448
0.00365087	-0.0541437	-468
-0.121584	-0.137129	-470
-0.110837	-0.146888	-482
0.30729	0.131187	-450
0.106801	0.174032	-452
0.0850396	0.116315	-452
0.154735	0.163688	-454
0.251597	0.143828	-456
0.0928607	0.197116	-452
0.231244	0.163287	-454
0.204536	0.143032	-456
0.156622	0.212324	-458
0.103443	0.187404	-456
0.258672	0.162017	-460
0.113141	0.180507	-468
0.221089	0.20652	-468
0.23164	0.172394	-468
0.277446	0.234421	-472
0.292744	0.137116	-476
0.32464	0.178349	-472
0.203235	0.120909	-472
0.0646565	0.18849	-472
0.0753983	0.172032	-472
0.110148	0.195452	-478
0.143073	0.184791	-476
0.196648	0.141946	-480
0.230879	0.144578	-484
0.221824	0.149941	-480
0.19725	0.193392	-482
0.124361	0.331818	-474
0.215026	0.239527	-476
0.238453	0.141755	-484
0.109588	0.125061	-482
0.185685	0.218904	-482
0.239862	0.202058	-460
0.170331	0.122225	-478
0.379048	0.171078	-454
0.282177	0.0335667	-448
0.11926	0.0855718	-450
0.214569	0.0741942	-452
0.210923	0.0569996	-452
0.180189	-0.0153916	-454
0.206429	-0.0467539	-458
0.146976	0.0817025	-454
0.13554	-0.0144111	-462
0.128053	0.0893753	-468
0.19455	0.0793533	-464
0.167138	0.0866904	-468
0.230627	0.0567759	-466
0.281971	0.0422134	-468
0.107613	0.0959952	-484
0.135535	0.0508535	-482
0.143371	0.0788466	-480
0.257767	0.101589	-480
0.27252	0.0742271	-478
0.225722	0.0518866	-476
0.241636	0.0406407	-478
0.20957	0.0243146	-476
0.168274	0.0387784	-476
0.323035	0.0781688	-476
0.277286	-0.0694629	-480
0.268828	0.0345275	-484
0.265933	-0.0145296	-484
0.352613	-0.00398773	-476
0.298102	-0.0595067	-472
0.216363	0.0394101	-472
0.300415	0.0627048	-468
0.284439	-0.0291381	-464
0.254317	-0.0295658	-462
0.250949	0.0877236	-464
0.134038	0.0896056	-458
0.208989	0.105872	-454
0.123117	0.110196	-478
0.261526	-0.0240909	-466
0.312988	-0.204987	-454
0.29263	-0.245562	-456
0.259726	-0.19711	-460
0.306874	-0.25609	-466
0.219999	-0.216845	-468
0.249997	-0.114782	-476
0.239451	-0.166353	-478
-0.11066	-0.144849	-234
0.179509	-0.19073	-208
0.211105	-0.185031	-206
0.223405	-0.0760172	-210
0.199567	-0.120375	-210
0.189478	-0.217731	-210
0.211689	-0.239836	-212
0.263546	-0.239784	-210
0.192138	-0.165579	-214
0.257724	-0.178508	-228
0.171153	-0.146105	-230
0.192925	-0.0721907	-230
0.203651	-0.191882	-238
0.294862	-0.226224	-234
0.347592	-0.107543	-216
0.170332	0.0154917	-214
0.151409	-0.00472553	-212
0.189459	0.0643965	-216
0.220017	0.0504503	-218
0.144587	-0.0481915	-220
0.159456	0.055681	-224
0.2626	0.0525455	-228
0.171245	0.0643891	-230
0.249218	0.0412444	-230
0.200427	-0.0095328	-244
0.186528	0.0743677	-244
0.165959	0.0671977	-244
0.134884	0.0557182	-256
0.239351	-0.0554953	-232
0.255156	0.0131587	-212
0.0496119	0.0172675	-260
0.0499498	0.0459996	-254
0.0681687	0.0180328	-248
0.0683618	0.0736693	-240
0.11906	0.05074	-234
0.226418	0.0800369	-212
0.215286	0.220815	-230
0.227905	0.236187	-228
0.0889219	0.106072	-236
0.131148	0.18888	-238
0.198959	0.0887226	-236
0.222498	0.127931	-240
0.255344	0.133221	-242
0.221368	0.16396	-244
0.204303	0.134611	-246
0.200625	0.116028	-252
0.157974	0.179957	-254
0.0991368	0.106711	-264
0.108903	0.116058	-262
0.129029	0.211133	-256
0.0508284	0.125487	-252
0.10268	0.177029	-248
0.247625	0.216921	-248
0.259945	0.236886	-250
0.263348	0.22187	-252
0.196473	0.231128	-246
0.111321	0.223608	-254
0.171216	0.193621	-256
0.189888	0.144641	-260
0.151322	0.119335	-264
0.204076	0.115033	-264
0.228218	0.146016	-264
0.281996	0.165394	-258
0.248368	0.0704298	-266
0.200195	0.0821841	-264
0.219008	0.0728445	-234
0.11822	0.240816	-250
-0.059822	-0.0244004	-256
-0.198259	0.134633	-234
-0.136863	-0.0870063	-260
0.156675	0.369476	-240
0.213905	-0.294707	-208
-0.147189	-0.108323	-240
0.0913019	0.173336	-232
-0.147295	-0.200781	-2
0.137648	0.18255	-2
0.141165	0.19195	-2
0.182226	0.0226939	-2
0.206721	0.0275923	-2
-0.124513	0.0869816	-1.39
-0.278736	-0.125535	-1.39
-0.116225	-0.205531	-1.39
-0.120513	-0.311829	-1.39
-0.0514751	-0.25459	-1.39
-0.0354739	-0.193184	-4.17
0.00214597	-0.224688	-1.39
0.00453219	-0.0622476	-1.39
0.0936951	0.0393057	-1.39
0.101885	0.0129662	-1.39
0.0527493	-0.0177606	-4.17
0.174504	-0.0160876	-1.39
0.196193	0.0438471	-1.39
0.218799	0.0640878	-1.39
0.208527	0.103551	-1.39
0.180568	0.122658	-1.39
0.180491	0.154193	-1.39
0.166189	0.155294	-1.39
0.158713	0.166235	-1.39
0.141261	0.165872	-1.39
0.126539	0.16929	-1.39
0.254795	0.0817103	-1.39
0.159626	0.0967063	-4.17
0.0916446	0.0931902	-1.39
0.348834	-0.323641	-1.39
0.265241	-0.365476	-1.39
0.307583	-0.0351892	-4.17
0.334285	-0.00803597	-1.39
0.322612	0.0662913	-1.39
0.28971	-0.0392124	-1.39
0.387348	0.0932442	-1.39
0.301841	0.125994	-1.39
0.290046	0.150111	-1.39
0.296926	0.164564	-1.39
0.281815	0.21106	-1.39
0.132332	-0.0190332	-84.17
0.192949	0.0385992	-84.17
0.159568	0.0751587	-84.17
0.146214	0.0863455	-86.95
0.162279	0.0997053	-81.39
0.182392	0.111278	-84.17
0.204387	0.125303	-81.39
0.22241	0.126458	-81.39
0.258319	0.0697853	-81.39
0.299079	0.138301	-86.95
0.277013	0.174645	-81.39
0.261944	0.22091	-86.95
0.18404	0.231764	-81.39
0.105959	0.234968	-81.39
0.0678326	0.0764612	-81.39
0.10586	0.0769387	-86.95
0.114015	0.0437542	-84.17
-0.0206852	-0.0934357	-84.17
-0.0509658	-0.216108	-84.17
-0.0946774	-0.141004	-84.17
-0.130917	-0.233517	-81.39
-0.188216	-0.217804	-84.17
-0.205573	-0.163323	-84.17
-0.224424	0.154131	-84.17
-0.117458	0.199913	-81.39
-0.273901	0.183276	-84.17
0.288091	-0.0121608	-84.17
0.309173	-0.0260145	-81.39
0.331904	0.0472981	-86.95
0.223732	-0.286508	-84.17
0.139296	-0.280792	-81.39
0.307539	0.0974091	-161.39
0.290693	0.12	-161.39
0.299214	0.183808	-161.39
0.32389	0.224421	-161.39
0.248548	0.107657	-161.39
0.244346	0.0977495	-161.39
0.384789	-0.334285	-161.39
0.181613	-0.0283413	-161.39
0.142946	0.00452984	-161.39
0.147699	0.0345308	-161.39
0.115004	0.142529	-161.39
0.0994138	0.154391	-161.39
0.186841	0.217934	-161.39
0.0994124	-0.09757	-161.39
0.0648858	0.0204775	-161.39
0.125758	0.0598153	-161.39
0.187238	-0.135608	-161.39
-0.0932318	-0.0871404	-161.39
-0.205002	0.0528602	-161.39
-0.0825443	-0.252929	-161.39
-0.0833256	-0.186463	-161.39
-0.0863821	-0.290327	-161.39
0.351722	0.0430587	-161.39
0.20881	-0.282818	-246.95
0.149486	-0.00730482	-244.17
0.134973	0.0625391	-244.17
0.157598	0.0588793	-241.39
0.10591	0.0245598	-244.17
0.122053	0.0891817	-241.39
0.246363	0.0692244	-244.17
0.265207	0.0649448	-244.17
0.318775	0.00279096	-241.39
0.271953	-0.0193842	-241.39
0.245381	-0.0429155	-241.39
0.124303	-0.254567	-244.17
-0.0170413	-0.210846	-241.39
-0.0991047	-0.261893	-244.17
-0.118465	-0.164688	-241.39
-0.0690357	-0.159985	-244.17
0.0775649	0.0231041	-241.39
-0.133486	0.134543	-244.17
-0.181223	0.276329	-241.39
-0.224171	-0.0147933	-244.17
-0.181744	-0.00458777	-244.17
0.396955	-0.232268	-241.39
0.187146	0.15859	-321.39
0.243999	0.207871	-321.39
0.297901	0.192229	-321.39
0.311225	0.164959	-321.39
0.318144	0.125808	-321.39
0.339843	0.081599	-324.17
0.291571	0.0617228	-321.39
0.277538	0.102605	-324.17
0.266679	0.126853	-321.39
0.21007	0.115344	-321.39
0.243501	0.131001	-321.39
0.159734	0.0951737	-321.39
0.152647	0.0359361	-324.17
0.189884	0.0528901	-324.17
0.196931	-0.0355407	-321.39
0.223057	-0.0425833	-321.39
0.287932	-0.0645303	-321.39
0.129195	0.193171	-324.17
0.0528999	0.00817993	-324.17
-0.00462281	0.0855128	-321.39
0.00657913	-0.0527964	-321.39
-0.133089	-0.118333	-326.95
-0.0782966	-0.135821	-321.39
-0.0565561	-0.169043	-321.39
-0.0841724	-0.195353	-321.39
-0.235543	0.241751	-321.39
0.271914	-0.346344	-321.39
0.321518	-0.291834	-321.39
0.342674	-0.397082	-401.39
0.208486	-0.244096	-401.39
0.123817	-0.0728307	-401.39
0.0952941	-0.0265644	-401.39
0.107376	0.0581799	-401.39
0.134326	0.0992591	-401.39
0.135297	0.16918	-401.39
0.195401	0.136124	-401.39
0.228206	0.107418	-401.39
0.25292	0.0883369	-401.39
0.267512	0.138258	-401.39
0.328067	0.11989	-401.39
0.329228	0.0493125	-401.39
0.317608	-0.0117699	-401.39
-0.0214527	-0.196907	-404.17
-0.0700752	-0.102831	-401.39
-0.107863	-0.198735	-401.39
-0.127183	-0.279291	-404.17
0.0903443	0.0788118	-401.39
0.316132	-0.108414	-409.73
0.3776	0.161125	-481.39
0.371531	0.146268	-481.39
0.308265	0.107901	-481.39
0.297365	0.0466162	-481.39
0.30265	0.176815	-481.39
0.23385	0.15744	-481.39
0.187119	0.114886	-481.39
0.174699	0.163213	-481.39
0.124323	0.0983177	-481.39
0.0935853	0.146833	-481.39
0.0351891	0.0969396	-481.39
0.167229	0.0198391	-481.39
0.205637	0.021739	-481.39
0.145725	-0.161173	-481.39
0.20661	-0.269221	-481.39
0.0483057	-0.0255965	-481.39
-0.00628818	-0.0840291	-481.39
-0.0247655	-0.133887	-481.39
-0.0730601	-0.202125	-481.39
-0.0912551	-0.270779	-481.39
-0.219788	0.146831	-481.39
0.277203	0.237208	-566.951
0.287903	0.159011	-566.95
0.308227	0.131289	-566.95
0.31794	0.0233161	-564.17
0.357255	0.0349431	-564.17
0.280966	-0.0109129	-569.73
0.237349	0.00151335	-569.73
0.241782	0.014897	-566.95
0.234345	0.0286897	-569.73
0.234419	-0.0218874	-566.95
0.18902	-0.00556173	-569.73
0.165698	-0.0976527	-566.95
0.104085	0.0984429	-566.95
0.114748	0.145518	-569.73
0.0910505	0.174664	-564.17
0.150728	0.115951	-569.73
0.0674939	0.0109191	-569.73
-0.115684	0.190561	-569.73
-0.150961	-0.0158687	-569.73
-0.120639	-0.100315	-569.73
-0.120468	-0.0797483	-569.73
-0.0387658	-0.102814	-569.73
0.013384	-0.118871	-572.51
-0.0578739	-0.212941	-569.73
-0.0592395	-0.228091	-569.73
-0.087185	-0.236749	-572.51
-0.12591	-0.20746	-566.95
-0.187036	-0.116394	-564.17
0.193976	0.18568	-569.73
-0.236946	0.224747	-652.51
-0.165839	-0.10503	-649.73
-0.117977	-0.16658	-655.29
-0.125958	-0.254421	-649.73
-0.228827	-0.224111	-641.39
-0.11226	-0.0985378	-655.29
-0.0418814	-0.146904	-644.17
0.0622899	-0.0776369	-649.73
0.0370432	-0.0559213	-646.95
0.105559	-0.047143	-646.95
0.167147	-0.0444813	-652.51
0.205954	-0.0389228	-652.51
0.189341	-0.129964	-649.73
0.207265	-0.16406	-652.51
0.167717	-0.289738	-644.17
0.272456	-0.0451516	-641.39
0.248924	0.00721104	-644.17
0.282831	0.0474873	-649.73
0.25607	0.147256	-649.73
0.24223	0.143472	-646.95
0.251447	0.168187	-646.95
0.28699	0.149796	-649.73
0.294346	0.189452	-652.51
0.387746	0.111568	-641.39
0.350852	0.0763326	-649.73
0.184122	0.180086	-649.73
0.127565	0.118274	-646.95
0.133242	0.0665179	-649.73
0.153815	0.0602611	-649.73
0.177997	0.0718482	-652.51
0.19483	0.164037	-652.51
-0.260032	0.106767	-721.39
-0.217084	0.0129562	-726.95
-0.110776	0.0637183	-721.39
-0.107692	-0.11635	-721.39
-0.0550264	-0.185609	-724.17
-0.100326	-0.291545	-724.17
-0.139799	-0.316379	-729.73
-0.203295	-0.116436	-724.17
-0.123589	-0.199827	-721.39
0.0235566	0.0478284	-726.95
0.0660984	0.0736337	-729.73
0.0690524	0.0786624	-726.95
0.117658	0.0593058	-726.95
0.142653	0.0675443	-721.39
0.183138	0.075978	-726.95
0.199163	0.134217	-726.95
0.186201	0.192964	-721.39
0.231322	0.171752	-726.95
0.247655	0.179125	-724.17
0.272629	0.225649	-726.95
0.295563	0.12676	-726.95
0.251466	0.103193	-729.73
0.263684	0.0326042	-724.17
0.281427	-0.0826726	-721.39
0.273366	-0.214905	-738.07
0.304742	-0.158773	-732.51
0.421122	-0.238883	-724.17
-0.111256	-0.175946	-787.49
-0.0943821	-0.160911	-787.49
-0.142861	-0.14864	-787.49
-0.0809934	-0.136738	-784.71
-0.109665	-0.207712	-787.49
-0.0035137	-0.0708763	-787.49
0.0166379	-0.0333804	-787.49
0.0481958	0.0090676	-787.49
-0.0946749	0.198653	-787.49
0.144545	0.0788163	-787.49
0.0906678	0.0525954	-787.49
0.173728	-0.00420726	-790.27
0.181846	0.0281362	-790.27
0.169846	0.0454824	-790.27
0.259202	0.0221819	-790.271
0.256206	-0.0666879	-790.271
0.308007	-0.00106793	-790.271
0.277644	0.0797152	-790.271
0.278295	0.101189	-790.271
0.261812	0.0909058	-787.491
0.240695	0.10037	-790.271
0.26801	0.1358	-790.271
0.243894	0.149194	-787.491
0.245912	-0.302833	-790.271
0.284963	-0.130811	-790.271
0.338919	-0.255633	-787.491
0.126407	-0.0554219	-787.49
0.102302	0.0625824	-787.49
0.17852	0.136276	-710.27
0.199704	0.134379	-707.49
0.196742	0.121924	-707.49
0.228755	0.100277	-707.49
0.24562	0.111465	-710.27
0.272583	0.0968803	-707.49
0.259334	0.167848	-707.49
0.25047	0.177363	-704.71
0.167997	0.0874027	-710.27
0.148039	0.0589498	-710.27
0.160451	0.042719	-710.27
0.116997	0.0547185	-707.49
0.0520468	0.106145	-707.49
0.0136358	0.0559394	-710.27
0.198829	0.013262	-707.49
0.219858	0.0301289	-704.71
0.204849	0.0454172	-710.27
0.215984	0.0585912	-707.49
0.219953	0.0784246	-710.27
0.212352	0.0908465	-710.27
0.210696	-0.0108261	-710.27
0.283045	-0.239644	-707.49
0.241635	-0.278483	-707.49
0.0904704	-0.105419	-707.49
-0.104346	-0.156712	-710.27
-0.0954975	-0.0743338	-710.27
-0.0740415	-0.205707	-707.49
-0.0259759	-0.191236	-704.71
-0.126701	-0.272569	-707.49
-0.158025	-0.266311	-710.27
-0.202806	0.109568	-627.49
-0.131124	-0.0162622	-630.27
-0.00430878	-0.0449607	-630.27
0.00535574	-0.0703428	-627.49
0.0450587	0.0102442	-630.27
0.0309741	0.0422284	-630.27
0.0490316	0.0647922	-627.49
0.0460811	0.183411	-633.05
0.160491	0.0747641	-630.27
0.169633	0.0428731	-630.27
0.153549	0.0222582	-627.49
0.178299	0.0031851	-630.27
0.158307	-0.0408539	-627.49
0.13903	0.270588	-633.05
0.23309	0.12611	-630.27
0.242828	0.109128	-630.27
0.265637	0.126415	-627.49
0.18463	0.121343	-630.27
0.328786	0.0128949	-630.27
0.229988	0.0444517	-630.27
0.232147	-0.00503862	-630.27
0.222309	-0.00631076	-630.27
0.261821	-0.046146	-627.49
0.220722	-0.132264	-624.71
0.205605	-0.131111	-627.49
0.26858	-0.324796	-624.71
0.293685	-0.346084	-627.49
0.300577	-0.311573	-627.49
0.174362	0.173951	-550.27
0.205101	0.154769	-553.05
0.202422	0.116691	-550.27
0.184814	0.0926894	-550.27
0.186517	0.0681998	-553.05
0.165083	0.0675819	-553.05
0.15432	0.114928	-553.05
0.208558	0.20441	-550.27
0.256658	0.15946	-550.27
0.233849	0.150068	-550.27
0.227009	0.0757973	-550.27
0.230198	-0.00382256	-550.27
0.244104	-0.0985699	-550.27
0.256425	-0.310265	-547.49
0.0752177	0.0458081	-553.05
0.0492746	0.109437	-550.27
0.132529	0.224692	-547.49
0.286026	0.177631	-550.27
0.338627	0.175308	-547.49
0.30272	0.127304	-547.49
-0.0315584	0.0603176	-550.27
-0.00281976	-0.0460043	-547.49
-0.0570732	-0.147226	-550.27
-0.14528	-0.126327	-547.49
-0.187418	-0.143157	-547.49
-0.181311	-0.231245	-550.27
-0.19614	-0.0507735	-464.71
-0.295773	0.114401	-461.93
-0.294646	0.288702	-464.71
-0.164956	-0.0751788	-467.49
-0.0358927	0.0199147	-464.71
-0.06826	0.0327828	-464.71
-0.147868	-0.175591	-464.71
0.163931	0.0010595	-467.49
0.24218	-0.057234	-467.49
0.277566	-0.195845	-467.49
0.346813	-0.340587	-470.27
0.263722	-0.298658	-467.49
0.231427	-0.23955	-467.49
0.307115	-0.00933311	-467.49
0.340034	0.16051	-470.27
0.275569	0.176167	-470.27
0.244278	0.172149	-464.71
0.229162	0.162264	-467.49
0.199002	0.14189	-464.71
0.206014	0.156266	-467.49
0.216635	0.180738	-464.71
0.257613	0.21653	-467.49
0.195915	0.175647	-470.27
0.16495	0.146498	-467.49
0.124122	0.216389	-467.49
0.109726	0.101558	-467.49
0.0904219	0.0682593	-470.27
0.0728922	0.110086	-467.49
0.107349	0.0550556	-464.71
0.139054	0.0311459	-464.71
-0.200265	-0.157936	-387.49
-0.163159	-0.104329	-384.71
-0.1514	-0.0541528	-381.93
-0.0956215	-0.19731	-381.93
-0.0721535	0.0757418	-384.71
-0.0606908	0.0116007	-387.49
0.097962	0.168643	-387.49
0.0789611	0.0260966	-387.49
0.193507	0.0130585	-387.49
0.247952	0.0256524	-387.49
0.350396	0.0568244	-387.49
0.3475	0.00643104	-387.49
0.269944	0.173599	-387.49
0.305284	0.115075	-384.71
0.329959	0.188931	-387.49
0.276396	0.186663	-384.71
0.240338	0.201102	-384.71
0.243626	0.268959	-384.71
0.203473	0.168952	-387.49
0.221586	0.143845	-384.71
0.220297	0.123442	-387.49
0.206176	0.107194	-387.49
0.196819	0.0919061	-384.71
0.187435	0.0452367	-387.49
0.165498	0.0752526	-387.49
0.157041	0.0608896	-381.93
0.139771	0.0716558	-387.49
0.134233	0.0534723	-387.49
0.131751	0.0315329	-384.71
0.144574	0.0307357	-387.49
0.378227	0.0581812	-390.27
-0.211727	0.10984	-387.49
-0.110807	-0.244065	-304.71
-0.121254	-0.163429	-304.71
-0.0543872	-0.149893	-307.49
-0.201642	-0.160583	-304.71
-0.040917	0.0216184	-304.71
0.115073	0.13513	-307.49
0.0749115	0.162389	-307.49
0.118921	0.219186	-307.49
0.149283	0.208218	-304.71
0.166519	0.201856	-307.49
0.211245	0.209006	-307.49
0.270393	0.212635	-307.49
0.259848	0.18601	-307.49
0.271469	0.181691	-307.49
0.264356	0.159578	-307.49
0.335374	0.113946	-307.49
0.301836	0.0510149	-307.49
0.220795	0.0971427	-307.49
0.213122	0.046039	-307.49
0.250246	-0.0236996	-307.49
0.195225	-0.10414	-307.49
0.269964	-0.101219	-307.49
0.210578	-0.176657	-307.49
0.362775	-0.0561664	-307.49
0.175837	0.106853	-307.49
0.278834	-0.374174	-310.27
0.225882	-0.374369	-310.27
0.238732	0.285696	-224.71
0.217611	0.247484	-227.49
0.242076	0.200575	-230.27
0.212878	0.141602	-230.27
0.257666	0.159108	-230.27
0.326045	0.178762	-230.27
0.115285	0.240705	-227.49
0.0744189	0.214589	-230.27
0.0758825	-0.0513879	-230.27
0.292256	-0.333757	-230.27
0.270313	-0.344731	-230.27
-0.163063	-0.0742857	-230.27
-0.144288	-0.212269	-224.71
-0.138056	0.0613827	-227.49
-0.0807147	0.084424	-230.27
-0.178972	0.263971	-227.49
0.19581	0.110875	-230.27
-0.126644	-0.186753	-147.49
-0.0937292	-0.162788	-150.27
-0.0572287	-0.164796	-144.71
-0.0125567	-0.0909265	-147.49
-0.0652975	-0.0568677	-144.71
-0.186943	-0.013672	-150.27
-0.167516	0.105028	-147.49
0.192389	-0.297019	-147.49
0.326075	-0.280236	-147.797
0.161427	-0.289183	-147.49
0.179145	-0.127443	-144.71
0.134461	-0.129699	-147.49
0.115804	-0.122437	-144.71
0.165367	0.0476573	-147.49
0.198841	0.0315548	-147.49
0.24237	0.0679457	-144.71
0.239996	0.135314	-144.71
0.263344	0.185509	-147.49
0.254888	0.183866	-144.71
0.227271	0.223471	-147.49
0.282233	0.29304	-143.577
0.0898301	0.19055	-144.71
0.0615281	0.113165	-144.71
0.212167	0.223703	-144.71
0.0687095	0.0863588	-147.49
0.11888	0.129536	-144.71
0.22027	0.139076	-147.49
0.192979	0.132566	-147.49
0.11957	0.0200889	-144.71
0.275977	0.338835	-67.49
0.251109	0.210034	-64.71
0.243887	0.178299	-64.71
0.210732	0.194057	-64.71
0.198313	0.18742	-64.71
0.195192	0.169432	-67.49
0.201786	0.158355	-67.49
0.237814	0.0945576	-67.49
0.300485	0.134944	-64.71
0.194455	0.0921015	-67.49
0.178823	0.137349	-67.49
0.146145	0.185696	-67.49
0.144973	0.127743	-64.71
0.138885	0.0921356	-64.71
0.112134	0.0889653	-67.49
0.103986	0.0483091	-67.49
0.0820329	0.041975	-67.49
0.0514769	0.0723544	-67.49
0.058112	0.036982	-67.49
0.149764	-0.00131068	-67.49
0.0767384	-0.0575006	-67.49
0.0566906	-0.104221	-67.49
0.0253465	-0.0611259	-70.27
0.270238	-0.295943	-64.71
0.351785	-0.251788	-67.49
0.0820356	0.0963155	-67.49
-0.171882	-0.1752	-70.27
-0.165233	-0.242697	-67.49
-0.145621	-0.213237	-70.27
-0.0797923	-0.0974298	-67.49
-0.200451	-0.106782	-795.375
-0.143404	-0.158016	-798.61
0.191356	0.169029	-795.861
0.101853	0.190216	-794.199
0.136119	0.255613	-792.68
0.121251	0.227967	-790.684
0.166818	0.164614	-790.574
0.123532	0.0647498	-798.61
0.133674	0.0026315	-798.61
0.156803	0.0743602	-798.61
0.169409	0.140141	-798.61
0.165757	0.0563716	-794.159
0.169776	0.116618	-794.188
0.202765	0.000276771	-793.524
0.232136	0.0645833	-791.675
0.187398	0.0637125	-791.086
0.248637	-0.0557436	-793.984
0.348524	0.115347	-790.275
0.330663	-0.135697	-790.331
0.0480794	0.0863118	-786.961
0.0649933	0.241012	-786.52
0.113311	0.158374	-787.177
0.119414	0.1175	-788.777
0.23766	0.115954	-783.884
0.259108	-0.0516834	-788.55
0.30343	0.081794	-787.731
0.0366378	0.0148348	-709.743
-0.149458	-0.108033	-718.61
-0.0691977	-0.12822	-718.61
0.134672	0.16042	-718.61
0.233321	0.191946	-718.61
0.0501298	0.154324	-712.755
0.0613816	0.155764	-712.748
0.204264	0.1751	-712.56
0.066249	0.0692966	-718.61
0.17504	0.0166758	-718.61
0.0497983	0.0295175	-715.593
0.0640705	0.0231896	-715.281
0.0826162	0.131738	-713.213
0.149073	0.0710981	-712.931
0.152956	0.0550634	-711.031
0.197189	-0.0272582	-711.3
0.199387	-0.323639	-713.586
0.26254	0.131956	-713.213
0.243537	-0.0613633	-715.334
0.241931	0.00773056	-712.893
0.337422	0.0820306	-712.405
0.22097	-0.290661	-712.033
0.265525	-0.361231	-710.727
0.273479	-0.367479	-710.901
0.0695877	0.345391	-708.105
0.191199	0.127875	-707.979
0.298363	0.129958	-708.319
0.392881	-0.362934	-701.93
0.145956	0.125445	-638.61
0.140847	0.0381072	-635.283
0.0911793	0.181295	-634.072
0.154076	0.0842646	-629.498
0.199644	0.150102	-633.539
0.199402	0.0749947	-631.294
0.225267	0.113834	-631.575
0.24333	0.0463213	-630.152
0.220556	-0.0885966	-637.165
0.274593	-0.100939	-635.314
0.37006	-0.0976762	-636.966
0.233053	-0.124745	-630.403
0.320064	-0.376306	-631.367
0.265973	0.0569195	-623.688
0.242773	-0.0284619	-621.93
0.285936	-0.0968212	-627.367
-0.146508	-0.138359	-550.606
0.0492463	0.197714	-558.61
0.0687138	0.19753	-558.61
0.0913458	0.147494	-558.61
0.116345	0.0904919	-558.61
0.15461	0.0750571	-558.61
0.155563	0.136105	-558.61
0.144438	0.0584899	-556.918
0.182324	-0.0341198	-558.61
0.227977	0.0923015	-558.61
0.260665	0.100258	-558.61
0.301077	0.0407834	-558.61
0.314713	0.0167206	-558.61
0.191045	0.0544276	-555.945
0.249413	-0.0235289	-550.906
0.288553	-0.275179	-557.028
0.222862	-0.115388	-552.011
0.2585	-0.117872	-553.176
0.376872	-0.0546104	-554.847
-0.16311	-0.25141	-475.379
-0.150196	-0.252756	-473.333
0.0831182	0.155902	-478.61
0.049493	0.0327268	-478.61
0.0992787	0.0754381	-478.61
0.103119	0.10371	-478.61
0.111237	0.210567	-478.61
0.11655	0.11181	-478.61
0.131801	0.0998233	-478.61
0.152262	0.13153	-478.61
0.221495	0.10824	-478.61
0.212872	0.0066631	-472.028
0.294527	0.0346927	-472.897
0.190046	0.0755272	-469.678
0.217839	-0.0835487	-469.607
0.23045	-0.148041	-478.61
0.321714	-0.00444404	-472.561
0.309587	-0.272079	-464.615
-0.12014	-0.076642	-389.907
0.113945	0.203853	-398.61
0.163039	0.215554	-398.61
0.190348	0.213923	-394.592
0.0935463	0.184837	-394.057
0.148937	0.00886433	-398.61
0.20832	0.0861453	-398.61
0.191954	0.119497	-395.049
0.0906899	0.0883296	-392.985
0.197372	0.107053	-392.061
0.197519	0.0376594	-392.525
0.221951	0.10443	-392.448
0.125513	0.0582761	-391.392
0.165366	0.0617554	-391.103
0.29944	0.0486401	-398.61
0.316288	-0.00550179	-398.61
0.360225	-0.0751569	-398.61
0.361412	-0.187606	-398.61
-0.128162	-0.148324	-311.333
0.0753728	0.147542	-318.61
0.147266	0.2484	-318.61
0.152907	0.135356	-318.61
0.172616	0.156296	-318.61
0.236321	0.232414	-318.61
0.182463	0.135245	-315.279
0.189548	0.178569	-313.399
0.107526	0.0991546	-318.61
0.116455	0.0859484	-318.61
0.155506	0.0573366	-318.61
0.193832	-0.0706829	-314.876
0.127352	0.0178993	-311.787
0.327041	0.0309981	-318.61
0.302756	0.0164973	-313.1
0.267728	-0.0933419	-310.231
0.301233	-0.256337	-311.795
0.274419	-0.199419	-309.502
0.183886	0.160592	-234.677
0.20507	0.17668	-232.794
0.119579	0.128552	-230.241
0.212644	0.151329	-230.78
0.220214	0.190928	-230.629
0.0771008	0.0703307	-230.583
0.177834	0.0353329	-231.161
0.194872	-0.145273	-234.546
0.340276	0.00349518	-232.361
0.258614	-0.189884	-233.231
-0.0969586	-0.180532	-228.205
0.0813376	0.199136	-228.333
0.160909	0.274614	-227.916
0.189047	0.132479	-228.567
0.248508	0.0996735	-224.225
-0.108373	-0.116753	-150.6
0.137119	0.168097	-152.339
0.205094	0.247826	-149.516
0.121751	0.0978088	-150.236
0.131583	0.0994844	-150.286
0.210094	0.1155	-150.474
0.23157	0.0043603	-152.648
0.316639	-0.0478897	-153.346
0.292278	0.00904022	-149.185
0.123883	0.251018	-145.604
0.227047	0.149946	-145.328
0.05401	0.145457	-141.93
0.144927	0.159957	-141.93
0.226488	0.250202	-141.93
0.142507	0.0339293	-143.916
0.188147	-0.0082191	-145.194
0.159388	0.000944563	-141.93
0.244601	0.179423	-146.322
0.291	0.071485	-141.93
0.0507917	0.154057	-71.8739
0.111917	0.209087	-77.0455
0.129246	0.210667	-74.5653
0.124432	0.128525	-74.059
0.148933	0.139085	-72.3906
0.158512	0.1253	-71.6745
0.185241	0.117012	-72.2797
0.20196	0.2406	-73.5827
0.249955	0.133338	-72.8254
0.115426	0.194718	-70.4184
0.189103	0.131951	-71.106
0.267483	0.228696	-71.0736
0.177784	0.0428146	-78.61
0.262394	-0.0713469	-70.2108
0.266013	-0.236204	-73.447
0.299444	0.150111	-70.9587
0.361091	-0.342371	-72.7476
0.364018	-0.406499	-73.5424
0.383119	-0.408747	-72.4261
0.403362	-0.225317	-71.837
0.420177	-0.23847	-69.321
0.00353758	-0.0585477	-67.3245
-0.0135053	-0.0752959	-61.93
0.164372	0.246592	-67.3882
0.267838	0.148102	-68.4221
0.288103	0.115047	-64.9813
0.163374	-0.262414	-61.93
0.37136	-0.390263	-67.9275
-0.109761	-0.247377	-795.83
-0.119037	-0.233639	-795.83
0.119629	0.0386354	-795.83
0.0955566	0.118654	-790.27
0.284662	0.00481156	-793.05
0.147134	0.0551144	-790.27
0.220848	-0.168278	-790.27
0.249803	-0.165999	-790.27
0.357697	-0.381623	-793.05
0.332292	-0.116435	-711.347
0.199022	-0.339879	-708.768
0.350328	-0.0253079	-710.202
0.1395	0.0598108	-710.27
0.146845	0.146883	-715.83
0.0974911	0.184761	-713.05
0.248809	0.176512	-713.99
-0.156465	-0.1073	-709.98
-0.0810464	-0.18442	-704.71
0.0878779	0.105733	-715.83
0.187351	0.211662	-710.376
0.214509	0.0501647	-710.412
0.22513	0.0710757	-710.074
0.235541	-0.00576442	-713.57
0.109931	0.0445348	-710.27
0.126923	0.00943034	-713.05
0.0827939	0.208293	-710.27
0.189157	0.113909	-713.246
-0.132302	-0.159397	-634.765
0.0688193	0.0991243	-638.61
0.195864	0.132084	-638.61
0.181168	0.135155	-635.83
0.171776	0.13703	-638.61
0.165626	0.12052	-638.61
0.178409	0.105204	-638.61
0.093742	0.204116	-638.61
0.159843	0.0474517	-638.61
0.167286	0.029421	-636.255
0.113362	0.0235307	-638.61
0.203369	0.0222825	-637.563
0.226662	0.0624313	-638.61
0.198964	-0.0365969	-638.114
0.290088	0.0145837	-634.592
0.347901	-0.0241006	-637.826
0.0985967	0.0513819	-553.043
0.110888	0.100257	-547.482
0.103607	0.172513	-553.042
0.188311	-0.0545288	-550.256
0.302394	0.108519	-553.028
0.21587	0.123565	-550.254
0.20431	-0.361367	-547.475
0.219506	-0.203929	-470.27
0.241056	-0.198986	-467.49
0.189749	0.0341024	-470.27
0.199087	0.00806544	-470.27
0.216724	0.101387	-470.27
0.180818	0.119832	-470.27
0.149996	0.126974	-473.05
0.101455	0.147731	-473.05
0.14969	-0.0187573	-473.05
0.162751	0.016281	-470.27
0.189899	-0.0106206	-470.27
0.188022	0.0536815	-470.27
0.241048	0.183298	-387.49
0.220102	0.0988508	-390.27
0.173706	0.05037	-390.27
0.180062	0.0255637	-384.71
0.210812	0.00534586	-387.49
0.249849	-0.0532246	-393.05
0.199572	-0.228744	-384.71
0.146528	0.0222902	-395.83
0.122519	0.0328642	-381.93
0.204348	-0.0782728	-395.83
0.227427	0.14908	-393.05
0.272188	-0.146213	-313.05
0.154608	0.0111052	-307.49
0.131033	0.0152796	-315.83
0.12247	-0.00428765	-304.71
0.230638	0.0688562	-313.05
0.194662	0.138688	-301.93
0.214573	0.191415	-310.27
0.144213	0.1461	-307.49
0.113884	0.171194	-307.49
0.102004	0.174032	-304.71
0.093368	0.284558	-313.05
0.282148	-0.109067	-304.71
-0.163735	-0.139334	-227.49
0.114622	0.088509	-233.05
0.133168	0.121699	-233.05
0.107985	0.163575	-233.05
0.227635	0.229708	-224.71
0.213914	0.133355	-238.61
0.228935	0.11947	-227.49
0.258838	0.0711663	-235.83
0.286177	-0.267994	-230.27
0.0755667	0.0976922	-235.83
0.116423	0.00218459	-153.05
0.182776	0.00705618	-158.61
0.172383	-0.0337926	-150.27
0.16419	-0.268071	-155.83
0.317626	0.0400144	-147.49
0.210057	0.0750254	-153.05
0.196223	0.0858087	-153.05
0.233628	0.119398	-147.49
0.190005	0.14812	-147.49
0.190241	0.165051	-155.83
0.0738166	0.149462	-155.83
0.113273	0.0499031	-155.83
0.156421	0.148906	-155.83
0.232731	-0.33252	-67.49
0.198457	-0.29225	-64.71
0.268652	-0.362841	-61.93
0.156737	-0.0311622	-75.83
0.0559764	-0.0108687	-64.71
0.0268375	0.0316592	-75.83
0.029538	0.139489	-73.05
0.111244	0.0551406	-64.71
0.16257	0.059613	-70.27
0.175656	0.0827038	-75.83
0.213912	0.0894226	-70.27
0.199687	0.0368182	-75.83
0.17651	0.000627345	-73.05
0.162878	0.0150534	-75.83
0.152594	0.164832	-67.49
0.139828	0.156802	-73.05
0.121979	0.162076	-73.05
-0.137274	-0.0497098	-73.05
-0.090868	-0.0945551	-70.27
0.233192	0.131639	-64.71
0.339711	-0.260434	-67.49
0.303375	0.0621452	-791.714
0.33193	0.218623	-794.579
0.232662	0.0730797	-798.38
0.226967	0.11944	-798.38
0.215394	0.0591656	-798.38
0.21127	0.0992014	-798.38
0.202015	0.0132667	-798.38
0.183878	0.0558501	-798.38
0.227312	0.0113793	-795.429
0.162556	0.0091697	-793.648
0.140704	-0.0847271	-793.633
0.132096	-0.0796432	-795.836
0.228682	0.100356	-792.477
0.21743	0.0348772	-791.309
0.186988	0.08842	-793.382
0.173102	0.0143946	-791.414
0.15469	0.0747303	-793.312
0.258547	0.101719	-789.508
0.249713	-0.0551866	-789.705
0.241874	0.127593	-788.473
0.216132	0.120874	-789.226
0.211987	-0.0484506	-789.142
0.214411	0.132561	-798.38
0.226254	0.132283	-793.908
0.261939	0.157065	-792.879
0.227709	0.149615	-789.34
0.0186968	-0.0620078	-798.38
0.0749443	0.0435338	-795.196
0.123244	0.0679721	-791.147
0.0463643	-0.0511598	-787.837
0.00696826	-0.0857028	-789.537
0.0741891	0.216499	-798.38
0.0582578	0.18763	-798.38
0.0608566	0.176883	-794.437
-0.0768265	-0.170381	-790.285
-0.0751727	-0.107899	-790.857
0.243953	-0.204653	-784.568
0.278867	-0.017004	-784.533
0.0858076	0.0433538	-784.832
0.113967	0.26408	-786.796
-0.0629261	-0.131282	-786.701
0.304163	0.00807328	-718.38
0.213926	0.052728	-718.38
0.212534	0.0714575	-718.38
0.217731	-0.0461233	-718.38
0.198787	0.0493273	-718.38
0.179053	0.0415326	-718.38
0.259442	-0.0867574	-712.647
0.199182	0.0551931	-713.006
0.313099	0.111888	-718.38
0.278369	0.154084	-718.38
0.254251	0.212733	-718.38
0.228513	0.286771	-718.38
0.231308	0.118341	-718.38
0.219135	0.109655	-718.38
0.214997	0.126881	-718.38
0.193309	0.218872	-718.38
0.189928	0.174069	-718.38
0.186277	0.0975493	-718.38
0.180288	0.166718	-718.38
0.231817	0.163068	-714.153
0.279608	0.188661	-711.484
0.228067	0.206051	-712.724
0.0982898	-0.192695	-718.38
0.123187	0.0852676	-718.38
0.101779	0.057414	-718.38
0.0663245	0.00582535	-718.38
0.0611251	0.0428415	-718.38
0.17502	-0.0217689	-715.042
0.165521	0.0803368	-714.598
0.114314	-0.0802175	-713.968
0.104378	0.0318666	-715.792
0.172821	0.0439611	-712.428
0.0471664	-0.00133568	-713.139
0.168802	0.157071	-718.38
0.151304	0.111877	-718.38
0.137552	0.265379	-718.38
0.134481	0.242919	-718.38
0.120098	0.295405	-718.38
0.112424	0.289376	-718.38
0.101268	0.115921	-718.38
0.0761011	0.107811	-711.457
0.0580881	0.213037	-712.142
-0.00747115	-0.0681738	-718.38
-0.14641	-0.121	-718.38
-0.0391004	-0.0924657	-712.632
-0.192382	-0.282878	-712.802
-0.307368	-0.00885035	-718.38
0.283849	0.00505166	-638.38
0.267595	-0.136663	-638.38
0.255557	-0.00373361	-638.38
0.25382	-0.0774512	-638.38
0.218824	0.0151656	-638.38
0.20875	-0.171697	-638.38
0.191302	0.0434431	-638.38
0.180011	0.0352176	-638.38
0.158636	-0.0166779	-638.38
0.227564	-0.00926764	-633.697
0.291611	0.086489	-638.38
0.249959	0.298217	-638.38
0.25028	0.241362	-638.38
0.243365	0.119717	-638.38
0.234164	0.206029	-638.38
0.229046	0.220154	-638.38
0.202598	0.149534	-638.38
0.191676	0.104156	-638.38
0.186218	0.152512	-638.38
0.18344	0.265936	-638.38
0.180857	0.293726	-638.38
0.180042	0.131062	-638.38
0.172597	0.0959136	-638.38
0.164535	0.144749	-638.38
0.141858	0.162732	-638.38
0.255941	0.146267	-636.403
0.248507	0.106877	-633.86
0.199243	0.0848146	-635.868
0.166391	0.123593	-634.835
0.160418	0.165584	-636.36
0.290902	0.164425	-631.632
0.19897	0.285086	-631.781
0.190988	0.320847	-634.892
0.133968	0.0477825	-638.38
0.130849	-0.189883	-638.38
0.127341	-0.0268161	-638.38
0.0888491	0.0174232	-638.38
0.0471826	0.00319907	-638.38
0.0419302	-0.00672108	-638.38
0.0399808	0.0226213	-638.38
0.0264523	0.0224522	-638.38
0.0171205	-0.0156035	-638.38
0.00333635	-0.0836509	-638.38
0.127912	0.125182	-638.38
0.103822	0.146688	-638.38
0.0977399	0.112911	-638.38
0.0759013	0.199922	-638.38
0.0728115	0.0533163	-638.38
0.07105	0.0989205	-638.38
0.0252263	0.0557855	-638.38
0.115853	0.214591	-634.877
0.0627965	0.135347	-633.941
-0.112415	-0.246553	-638.38
-0.164527	-0.273564	-638.38
-0.174306	-0.262313	-638.38
-0.0844407	-0.0518638	-638.38
-0.0896481	-0.159006	-638.38
-0.112034	-0.152968	-638.38
-0.130746	-0.155055	-638.38
-0.10309	-0.0517222	-636.16
0.325013	0.170281	-558.38
0.302508	-0.356975	-558.38
0.290443	-0.213895	-558.38
0.28961	-0.243014	-558.38
0.283689	-0.262797	-558.38
0.213049	-0.27206	-558.38
0.284463	0.0546404	-558.38
0.212386	0.0214572	-558.38
0.191828	0.0408449	-558.38
0.192337	0.00424735	-558.38
0.168386	-0.0381368	-558.38
0.149171	0.0227912	-558.38
0.135587	0.045176	-558.38
0.134217	0.0250474	-558.38
0.246664	0.0284933	-554.081
0.221756	0.0139801	-556.744
0.185843	0.00732096	-553.372
0.293231	0.28226	-558.38
0.285995	0.124895	-558.38
0.277565	0.213111	-558.38
0.267868	0.127009	-558.38
0.266772	0.0883832	-558.38
0.259013	0.276188	-558.38
0.250848	0.197931	-558.38
0.219513	0.12793	-558.38
0.214579	0.0995264	-558.38
0.204588	0.244026	-558.38
0.206885	0.0801245	-558.38
0.196621	0.231378	-558.38
0.198818	0.165996	-558.38
0.197238	0.183431	-558.38
0.173742	0.0994981	-558.38
0.166266	0.253914	-558.38
0.152643	0.278957	-558.38
0.146021	0.107145	-558.38
0.145082	0.122948	-558.38
0.301838	0.156517	-554.718
0.247237	0.120035	-552.121
0.201088	0.126362	-552.388
0.171679	0.209768	-552.123
0.222644	0.298827	-549.557
0.168356	0.33582	-556.207
0.13261	-0.0289449	-558.38
0.126758	0.00318864	-558.38
0.11869	0.0208476	-558.38
0.118267	-0.011077	-558.38
0.109911	-0.0102183	-558.38
0.0714187	0.0241773	-558.38
0.0580953	0.00296687	-558.38
0.049913	0.0270554	-558.38
0.0185558	-0.133855	-555.754
0.0324865	-0.024064	-553.257
0.015864	-0.0773	-550.342
0.089302	0.175735	-558.38
0.0876961	0.144312	-558.38
0.0776617	0.0999519	-558.38
0.0144773	0.0707685	-558.38
0.0906249	0.28598	-551.599
0.0663454	0.257459	-550.749
-0.139959	-0.230925	-558.38
-0.0925661	-0.148888	-558.38
-0.0461734	-0.133752	-551.816
-0.158706	-0.224612	-552.716
-0.0629876	0.0621551	-558.38
-0.151384	0.0410944	-554.704
-0.165523	0.1673	-551.878
0.341272	-0.240001	-467.194
0.318761	-0.00341095	-469.42
0.320149	0.170361	-470.708
0.311295	0.149722	-468.91
0.248851	-0.292678	-478.38
0.226983	-0.240301	-478.38
0.265731	-0.241642	-471.524
0.211856	-0.275539	-467.974
0.25448	0.0223315	-478.38
0.117764	0.0188173	-478.38
0.122789	0.0232338	-474.545
0.281034	-0.177863	-471.257
0.277565	-0.161961	-471.3
0.270245	-0.00327917	-471.424
0.200333	0.0226414	-469.089
0.143561	-0.105902	-467.478
0.245082	0.101199	-478.38
0.236157	0.182727	-478.38
0.171332	0.116235	-478.38
0.128172	0.10221	-478.38
0.11561	0.102324	-478.38
0.264454	0.0661403	-473.895
0.234628	0.225136	-476.139
0.23502	0.100536	-475.771
0.214245	0.0484802	-474.582
0.202338	0.102303	-474.068
0.190865	0.191535	-475.583
0.187399	0.202659	-475.012
0.187326	0.142408	-475.72
0.153886	0.118219	-474.112
0.1475	0.148626	-474.115
0.140356	0.0872044	-474.266
0.116437	0.117133	-474.561
0.114854	0.124088	-474.471
0.115923	0.0671257	-473.652
0.190408	0.0533577	-471.761
0.182598	0.170853	-472.373
0.183585	0.0666683	-472.176
0.160081	0.188086	-472.353
0.141877	0.160755	-473.039
0.1331	0.12533	-472.54
0.252893	0.197252	-470.045
0.249095	0.112284	-468.347
0.194661	0.215026	-468.615
0.0509294	0.0220346	-470.81
0.057558	0.0286075	-469.237
0.0544676	-0.0468994	-469.146
0.107151	0.09187	-474.258
0.0967177	0.078899	-473.75
0.0753924	0.137553	-473.864
0.0709866	0.195214	-474.65
0.0649563	0.174348	-476.457
0.0824471	0.214182	-471.934
0.0652398	0.0399521	-471.608
0.0511007	0.173138	-472.76
0.0498046	0.0425437	-468.537
-0.11357	-0.208782	-473.677
-0.117013	-0.129812	-473.662
-0.147543	0.0504205	-467.781
0.315217	0.0669149	-465.746
0.177246	-0.0516161	-465.638
0.217113	0.335694	-465.951
0.109631	0.0397978	-466.711
0.0546601	0.106531	-465.841
0.0272262	0.0323655	-463.941
-0.0574286	-0.235061	-466.241
0.227993	-0.317126	-394.991
0.261844	-0.310321	-392.422
0.216434	-0.289073	-392.976
0.15937	0.0318213	-394.341
0.302154	0.0281458	-391.062
0.279123	-0.0829394	-391.861
0.234254	0.0196892	-390.905
0.224589	0.0306364	-390.853
0.224512	-0.0116911	-392.753
0.220108	0.043314	-392.151
0.175887	0.0458908	-388.505
0.244429	0.209539	-394.175
0.237598	0.172347	-393.723
0.290368	0.179408	-392.969
0.251373	0.167048	-391.61
0.23883	0.205036	-393.426
0.23622	0.109409	-390.9
0.228649	0.229229	-391.5
0.221768	0.120281	-391.44
0.208852	0.219408	-391.225
0.206787	0.0790033	-393.397
0.200919	0.19831	-391.513
0.201599	0.106946	-390.491
0.189045	0.12608	-393.031
0.177468	0.0893783	-391.539
0.175603	0.121707	-392.83
0.13281	0.226808	-392.856
0.283467	0.157551	-387.238
0.25665	0.228826	-388.466
0.170657	0.126248	-389.787
0.260785	0.310793	-390.549
0.234971	0.304841	-388.583
0.160069	0.32297	-388.661
0.130435	-0.023604	-391.83
0.0823092	-0.189206	-392.587
0.0725583	0.0379697	-391.513
-0.0195376	-0.00788258	-390.997
0.126837	0.0215195	-388.13
0.0623365	0.00455548	-389.614
-0.034093	-0.130798	-388.181
0.129012	0.0537017	-393.099
0.114415	0.21874	-392.321
0.109978	0.200858	-392.808
0.101486	0.112038	-391.752
0.100628	0.089627	-393.146
0.0845384	0.0686028	-392.004
0.0813076	0.157587	-391.695
0.0757619	0.26392	-391.157
0.104814	0.180496	-388.922
0.0914726	0.19137	-389.526
0.0735921	0.0499962	-389.679
-0.0390114	-0.0469771	-390.95
-0.0385499	-0.0953592	-390.671
-0.0997414	-0.226594	-392.394
-0.152321	-0.0291066	-391.636
-0.163991	-0.0337316	-390.848
-0.0533205	-0.148172	-388.904
-0.145533	-0.16986	-389.28
-0.164284	-0.211232	-389.258
0.290863	0.246103	-385.361
0.18112	0.179089	-385.844
0.019933	-0.119494	-384.897
-0.016774	-0.115279	-385.511
0.0479723	-0.0771922	-383.61
-0.142864	-0.125376	-385.183
0.289971	0.126052	-313.144
0.298473	0.147563	-314.453
0.287939	0.224877	-316.485
0.292503	0.191592	-312.29
0.228456	-0.330778	-318.38
0.211453	-0.22715	-318.38
0.208366	-0.259678	-313.169
0.162358	-0.290876	-313.341
0.285611	0.0715156	-318.38
0.28855	-0.0383806	-313.898
0.269953	0.050514	-314.413
0.259993	0.0355864	-315.426
0.261566	-0.117596	-316.01
0.212052	0.0954119	-315.883
0.191702	0.0775504	-315.19
0.138304	0.0783392	-314.28
0.138506	0.0584117	-316.469
0.123218	0.0433734	-316.123
0.210475	-0.0429833	-311.392
0.158899	0.0561993	-313.275
0.148391	0.0671422	-312.772
0.140806	-0.0693536	-312.834
0.261302	0.123794	-318.38
0.243462	0.124672	-318.38
0.225711	0.196043	-318.38
0.219257	0.156234	-318.38
0.249316	0.221693	-314.578
0.242896	0.19472	-313.847
0.243695	0.166663	-315.356
0.240111	0.21136	-314.33
0.227971	0.168221	-314.703
0.214695	0.147149	-314.62
0.211383	0.180232	-316.089
0.197599	0.273756	-314.257
0.201641	0.152355	-313.656
0.196313	0.226698	-315.649
0.162319	0.186483	-313.944
0.160382	0.235181	-314.858
0.118226	0.244363	-315.965
0.232928	0.237828	-312.136
0.205192	0.199601	-312.176
0.198785	0.127575	-312.051
0.198014	0.139203	-312.528
0.153929	0.162872	-313.319
0.134512	0.237784	-312.262
0.133198	0.153845	-312.908
0.145838	0.3523	-309.976
0.10785	0.0742399	-316.066
0.0877467	0.0688744	-314.1
0.0661189	0.0613461	-314.283
0.05695	-0.000767247	-313.759
0.0958457	0.0907529	-313.31
0.0725614	-0.0840073	-312.635
0.0649302	0.0840405	-312.983
0.0511464	-0.0470561	-312.631
0.0428853	-0.0137886	-312.33
0.0419395	-0.0252115	-312.682
0.0171527	-0.0382074	-311.53
0.0546339	0.0625974	-310.004
0.0230015	-0.0671562	-309.138
0.0774776	0.196667	-314.31
0.0800019	0.123348	-310.913
0.0518744	0.31083	-311.184
0.0222225	0.112203	-312.456
-0.0760813	-0.18654	-312.527
-0.190377	-0.274507	-311.019
-0.198677	-0.280601	-311.019
-0.107898	-0.172687	-313.703
-0.124927	-0.103313	-314.012
-0.133119	-0.129831	-314.949
-0.0639424	0.0891032	-312.486
-0.0604489	-0.0652262	-311.958
-0.056866	-0.163422	-311.786
-0.0653548	-0.141039	-313.212
-0.0812481	-0.117446	-312.409
-0.118603	-0.172574	-313.388
-0.125992	-0.145452	-313.292
-0.166925	-0.160252	-311.128
-0.163572	0.271268	-310.1
0.324483	0.192088	-233.166
0.238313	-0.265392	-238.38
0.292086	-0.00710381	-238.38
0.286383	0.0147833	-238.38
0.258788	-0.045181	-238.38
0.198268	0.032528	-238.38
0.197329	0.0168168	-238.38
0.173328	0.0145124	-238.38
0.148357	0.0753777	-238.38
0.253304	0.020728	-235.458
0.175088	-0.0170019	-234.275
0.264617	-0.0812608	-231.043
0.266166	0.119341	-238.38
0.25911	0.179422	-238.38
0.245424	0.18773	-238.38
0.246743	0.126991	-238.38
0.233447	0.171681	-238.38
0.227774	0.228488	-238.38
0.206162	0.324816	-238.38
0.214053	0.151255	-238.38
0.179238	0.214084	-238.38
0.184255	0.127011	-238.38
0.170105	0.141332	-238.38
0.152945	0.102425	-238.38
0.147117	0.0877471	-238.38
0.130509	0.143926	-238.38
0.120361	0.169912	-238.38
0.23024	0.237035	-233.615
0.224235	0.253363	-233.768
0.219682	0.315325	-235.51
0.225194	0.196934	-234.113
0.201308	0.14494	-234.96
0.207532	0.200514	-231.991
0.170918	0.312456	-228.222
0.124774	0.0312745	-238.38
0.104076	0.0283928	-238.38
0.0656262	0.0458165	-238.38
0.0659283	0.0317587	-238.38
0.0763891	0.0476342	-231.81
0.0649567	0.0657097	-230.417
0.0128283	-0.0486547	-232.427
0.0669742	-0.00507171	-229.356
-0.00204052	0.0378644	-228.315
0.0924305	0.206401	-238.38
0.0891994	0.196054	-238.38
0.0836834	0.193843	-238.38
0.0867538	0.118315	-238.38
0.0804005	0.184735	-238.38
0.0777853	0.201248	-235.272
0.0625323	0.118571	-235.129
-0.136262	-0.1474	-238.38
-0.221593	-0.143169	-238.38
-0.0855924	-0.0968108	-236.524
-0.130871	-0.174909	-232.429
-0.171327	-0.19851	-231.619
0.358359	-0.00906513	-153.448
0.249658	-0.198895	-150.711
0.207732	-0.236408	-151.534
0.332904	-0.333579	-148.638
0.177928	-0.247632	-149.171
0.276084	0.0664739	-158.38
0.237313	-0.121357	-153.667
0.186433	-0.0112607	-155.17
0.34502	-0.11685	-153.153
0.344388	-0.13571	-153.005
0.244401	0.0616306	-152.825
0.193681	0.0447189	-152.814
0.194921	-0.0425919	-149.062
0.272396	0.0975223	-155.154
0.264219	0.106335	-155.957
0.209123	0.13161	-156.724
0.196763	0.0948521	-154.371
0.184853	0.160395	-153.813
0.264512	0.0921711	-153.297
0.226637	0.179042	-152.819
0.21152	0.186829	-150.856
0.193191	0.199432	-151.909
0.181207	0.279865	-151.633
0.174018	0.229428	-152.98
0.27449	0.154021	-148.086
0.273677	0.177913	-148.179
0.218393	0.109749	-147.75
0.16286	0.284933	-148.899
0.142047	0.0460076	-154.482
0.161836	-0.133017	-150.758
0.1481	-0.0248594	-151.096
0.132577	-0.000879848	-150.874
0.107799	0.0495992	-151.038
0.0479064	0.00213894	-152.365
0.150331	-0.0467169	-149.598
0.0924004	-0.0422762	-148.385
0.156833	0.187259	-151.094
0.156542	0.235066	-149.577
0.147339	0.308399	-147.383
0.110873	0.0921327	-149.815
0.0751498	0.147417	-148.611
0.0675353	0.121043	-148.506
0.0594375	0.197775	-149.744
-0.123162	-0.235996	-151.381
-0.147837	-0.214747	-148.234
-0.149235	-0.151736	-147.518
-0.0617075	0.0772132	-148.256
-0.0675819	0.0892455	-148.537
0.195611	0.0330378	-146.31
0.227289	0.207949	-145.64
0.197646	0.221998	-145.305
0.245344	0.316105	-142.48
0.0875203	0.0403314	-144.601
0.161257	0.115689	-146.579
0.147723	0.325686	-145.198
0.151577	0.0861968	-144.965
0.0799415	0.112718	-145.136
0.0698698	0.241598	-146.076
0.0818924	0.321855	-140.96
0.0953136	0.28812	-138.94
-0.0410136	-0.0751717	-145.857
-0.142154	-0.165754	-145.205
-0.181761	-0.0900773	-145.145
0.401685	-0.0954857	-78.38
0.391299	-0.0130732	-78.38
0.353964	-0.0164933	-78.38
0.338629	-0.129063	-78.38
0.313186	-0.0780859	-78.38
0.23023	-0.23187	-78.38
0.227017	-0.264847	-75.6171
0.147176	-0.319633	-75.6279
0.217148	-0.191616	-78.38
0.190414	0.0422705	-78.38
0.141063	0.00561096	-78.38
0.242184	0.232703	-78.38
0.240502	0.162305	-78.38
0.236989	0.19722	-78.38
0.228165	0.175566	-78.38
0.214121	0.187336	-78.38
0.210913	0.16567	-78.38
0.205654	0.229054	-78.38
0.205357	0.200037	-78.38
0.204576	0.146599	-78.38
0.200969	0.177355	-78.38
0.192371	0.308617	-78.38
0.193845	0.0906714	-78.38
0.185775	0.296635	-78.38
0.161426	0.188067	-78.38
0.148843	0.223765	-78.38
0.213102	0.249255	-74.2621
0.205533	0.25925	-73.5615
0.191123	0.172457	-75.7492
0.134168	0.250681	-72.3393
0.215942	0.330838	-71.0283
0.132552	0.0498886	-78.38
0.0706117	0.0265386	-78.38
0.0647056	-0.000534743	-78.38
0.0632474	0.0290595	-78.38
0.0504691	0.00863855	-78.38
0.0325011	-0.0419806	-78.38
0.0213306	0.0109326	-78.38
0.00246833	-0.0696806	-78.38
0.000924586	-0.0924358	-78.38
0.0301314	0.0239273	-75.5091
0.0866578	0.0838533	-78.38
0.0655506	0.187883	-78.38
0.129371	0.189517	-71.559
0.0775078	0.213606	-71.8235
0.126905	0.28531	-69.4067
-0.0907506	-0.226261	-78.38
-0.133813	-0.228764	-78.38
-0.0561112	-0.110165	-78.38
-0.139808	0.113983	-78.38
-0.147889	0.120767	-78.38
