# Supplementary material for: Spinal premotor interneurons controlling antagonistic muscles are spatially intermingled
Source: eLife. 2022 Dec 13;11:e81976. doi: 10.7554/eLife.81976 (PMC9844990; doi:10.7554/eLife.81976)
Supplement: Figure 3—figure supplement 1—source data 11. [file elife-81976-fig3-figsupp1-data11.xlsx]

## Sheet: Sheet1
-0.286458	0.119433	24
-0.174586	-0.14353	18
-0.139639	-0.100512	14
-0.146798	-0.120157	12
-0.123098	-0.141236	4
0.168419	0.311213	32
0.319393	0.108186	28
0.325884	0.00837239	28
0.338495	0.0300639	26
0.191608	0.0267496	24
0.160413	0.0613151	32
0.108626	0.169321	26
0.187683	0.235589	26
0.277971	0.15194	32
0.0601743	0.301796	22
0.24169	0.183846	20
0.227428	0.140142	22
0.195569	0.0923313	20
0.279706	0.118537	18
0.211049	0.0292786	10
0.28178	0.0278441	2
0.17687	0.0675233	18
0.228797	0.0423876	2
0.226101	-0.0220316	2
0.230736	0.00438407	10
0.178255	0.025921	16
0.252326	-0.128795	16
0.213464	-0.0651117	14
0.232116	-0.128981	10
0.229357	-0.228868	10
0.255728	-0.136846	24
0.282246	-0.16934	26
0.214723	-0.202205	22
0.288517	-0.0939019	12
0.271725	-0.137607	0
0.283453	-0.0530169	0
0.276439	-0.0365256	4
0.254275	-0.231273	6
-0.303763	0.207312	242
-0.256886	-0.0690748	264
-0.101971	-0.138886	258
0.00823851	-0.056366	256
-0.114837	-0.197904	246
0.00304151	-0.0811278	230
-0.114852	-0.111821	232
-0.0939035	-0.130236	228
0.239533	0.213134	274
0.181341	0.0960154	272
0.132158	0.181632	268
0.226507	0.198079	268
0.247907	0.194137	268
0.251466	0.151704	266
0.118479	0.0576486	266
0.190455	0.0183345	262
0.203704	0.118496	262
0.233274	0.142996	264
0.237445	0.123772	264
0.229248	0.137159	260
0.300493	0.12383	262
0.207864	0.113118	256
0.299265	-0.0027181	256
0.148557	0.027611	256
0.147138	0.0663203	252
0.182408	0.1295	250
0.0885821	0.124785	246
0.0954528	0.0579109	250
0.119692	0.0708019	250
0.15633	0.108229	248
0.135858	0.0528828	244
0.258674	0.149007	242
0.206139	0.130943	242
0.215476	0.0629682	244
0.109588	0.0790509	240
0.206035	0.0484814	238
0.172408	0.0364139	236
0.164247	0.0695339	234
0.101178	0.0688926	234
0.217745	0.000910893	242
0.274192	-0.00611391	244
0.197403	0.0191943	248
0.106603	0.162671	244
0.0782814	0.237036	240
0.0411718	0.259736	252
0.108339	0.244112	260
0.0625557	0.363898	260
0.212792	0.129769	272
0.328976	0.016192	268
0.317722	-0.0171685	266
0.258415	-0.0806614	262
0.172138	-0.064054	262
0.228725	-0.260974	260
0.181589	-0.0232387	252
0.335017	0.00105664	252
0.289814	-0.19163	252
0.295768	-0.181413	252
0.259368	-0.127977	236
0.219258	-0.0823666	240
0.134562	-0.0440071	240
0.325437	-0.33131	250
0.169231	-0.0127015	232
-0.11736	-0.115046	502
-0.153191	0.047279	502
-0.133297	-0.154022	508
0.120876	0.222845	510
0.148547	0.186447	510
0.161705	0.170418	506
0.330257	0.042734	508
0.116436	0.0872388	498
0.15648	0.127264	482
0.343473	0.0500203	500
0.280856	-0.0118312	502
0.235958	0.0289681	482
0.319063	-0.113846	502
0.345083	-0.126667	496
0.20394	-0.242376	494
0.215483	-0.0516993	492
0.27949	-0.0246199	488
-0.132871	0.00346599	746
-0.123597	-0.153802	738
-0.135174	-0.0909788	722
-0.0403501	0.0507056	724
0.048854	0.101425	716
-0.177948	-0.207752	730
0.0843614	0.113356	744
0.111382	0.176834	752
0.212712	-0.0128352	746
0.17108	0.0409912	746
0.336614	0.0439808	744
0.23768	0.0971167	744
0.228116	0.0847579	738
0.12971	0.0792413	728
0.154866	0.198238	728
0.188343	0.0179928	726
0.239643	0.0235784	720
0.286001	-0.0264161	720
0.188815	0.0827695	716
0.291238	-0.0404665	744
0.255991	-0.0595915	742
0.289807	-0.178008	742
0.258487	-0.173085	728
0.204036	-0.250262	736
0.337889	-0.15965	710
0.187524	-0.00815738	28
-0.0552362	-0.135661	22
-0.161301	-0.221538	26
0.103322	-0.0001256	8
0.0363678	0.0109999	6
0.107415	-0.0223303	4
0.139148	-0.0175377	2
0.155394	-0.0303952	0
-0.0771237	-0.102073	4
-0.131837	-0.133638	4
-0.137779	-0.145491	0
-0.0470599	-0.116319	8
-0.112321	-0.105881	12
-0.0979177	-0.104572	6
-0.129181	-0.165323	4
0.227984	0.0750096	32
0.160875	0.0554557	30
0.127323	0.222913	32
0.0860064	0.217288	30
0.0827552	0.200001	28
0.276583	0.24917	28
0.252958	0.13662	26
0.229533	0.139323	24
0.224932	0.206123	24
0.179792	0.137102	26
0.280211	0.0738594	30
0.216997	0.0368338	28
0.222682	0.12484	30
0.246659	0.217294	32
0.186832	0.131893	32
0.180049	0.0937108	30
0.109587	0.094114	28
0.138049	0.103243	24
0.192449	0.0514894	22
0.17972	0.0647501	22
0.229639	0.0929439	24
0.229083	0.0640824	22
0.0923055	0.0794519	22
0.0714341	0.328364	20
0.207539	0.0846279	14
0.224307	0.114038	12
0.272601	0.105008	14
0.310991	0.11655	18
0.284895	0.172078	16
0.118586	0.208853	14
0.22587	0.0274998	16
0.145645	0.0788635	20
0.179086	0.129275	20
0.28578	0.115578	22
0.225062	0.29705	18
0.213441	0.161046	6
0.235077	0.139786	4
0.246219	0.147798	4
0.247414	0.175053	8
0.233858	0.113562	4
0.10874	0.137076	4
0.140217	0.157833	0
0.0521786	0.110211	0
0.309032	0.0537501	4
0.2943	0.0691791	4
0.12683	0.0834248	4
0.108058	0.0893214	10
0.251168	0.0128773	6
0.267777	-0.153424	30
0.165583	0.0167709	2
0.259896	-0.00789296	4
0.222208	-0.0300647	6
0.266229	-0.0987149	8
0.250873	-0.117799	10
0.230452	0.00347052	24
0.168355	0.0396036	28
0.269771	0.0368206	28
0.231661	-0.157397	4
0.413616	-0.0137763	0
0.29265	-0.207828	24
0.256273	-0.207299	28
0.209692	-0.277827	8
0.216121	-0.168542	0
-0.242985	0.0400379	244
-0.182037	0.12586	238
-0.131912	0.0260842	248
-0.141622	-0.184174	232
-0.122767	-0.129822	228
-0.129754	-0.131478	224
0.106357	0.206986	252
0.125645	0.210304	252
0.142423	0.225971	252
0.291046	0.16383	250
0.256671	0.158631	248
0.243413	0.155958	250
0.238268	0.145418	252
0.228926	0.155462	252
0.201957	0.15588	250
0.179234	0.253221	250
0.24926	0.254007	244
0.0940928	0.180663	242
0.112896	0.368336	244
0.233731	0.15856	240
0.27711	0.169673	242
0.107831	0.198753	234
0.230975	0.176128	232
0.29058	0.171251	230
0.263267	0.164513	228
0.185896	0.17627	220
0.205731	0.161988	222
0.260742	0.178235	222
0.205458	0.294889	230
0.098743	0.152936	228
0.200021	0.138912	252
0.169783	0.0138248	248
0.183842	0.0665602	248
0.129617	0.0292409	250
0.20558	0.0755727	242
0.21432	0.101741	242
0.247512	0.0230178	240
0.113038	0.126917	240
0.19105	0.000347875	238
0.176671	0.0275079	236
0.123115	0.0282552	234
0.175314	0.0541913	234
0.196167	0.112596	234
0.178923	0.0911884	236
0.159761	0.085558	228
0.181877	0.128405	230
0.211757	0.136644	232
0.223997	0.0925413	228
0.208775	0.123245	224
0.154531	0.0282874	224
0.124614	0.00379442	224
0.128538	-0.0382083	226
0.209373	0.029563	230
0.203498	0.0109967	230
0.243753	0.0247378	232
0.160996	0.013915	220
0.166602	0.125055	222
0.277228	0.0162664	252
0.305463	0.00132064	248
0.275979	-0.0449919	246
0.374293	0.00156544	238
0.289873	0.154579	234
0.288573	0.00398124	230
0.256596	0.0742778	226
0.271263	0.0824529	230
0.273619	0.0549192	222
0.248968	0.0105393	220
0.254697	0.0933401	220
0.246334	0.072532	242
0.258627	0.110631	244
0.284959	0.139395	242
0.263795	0.142784	248
0.293421	0.123618	242
0.262457	-0.0332672	218
0.172986	-0.0566972	252
0.153632	-0.148382	252
0.207196	-0.124063	252
0.173707	-0.145431	244
0.265162	-0.134776	240
0.337751	-0.0674492	238
0.230787	-0.0770157	236
0.290142	-0.0496238	232
0.248092	-0.120462	230
0.242396	-0.134454	228
0.242391	-0.0745226	224
0.286688	-0.1318	222
0.192497	-0.222627	224
0.236243	-0.0626949	244
0.234584	-0.306098	242
0.226763	-0.148272	238
-0.122153	0.0373984	506
-0.253175	-0.154681	494
-0.112443	-0.114925	486
-0.163286	-0.143948	486
-0.2141	-0.0783699	484
-0.124057	-0.0337256	476
-0.150247	0.0402077	478
0.203432	0.170076	512
0.225708	0.0653525	508
0.0713095	0.143888	498
0.16273	0.0696164	496
0.246156	0.0427714	494
0.251177	0.0682084	488
0.0810725	0.111166	488
0.184563	0.143782	482
0.0836862	0.29305	494
0.30519	0.063028	486
0.285853	0.00301525	512
0.308619	-0.00714627	512
0.179684	-0.00715956	504
0.177384	0.0120278	502
0.244341	-0.112846	504
0.300465	-0.0545933	504
0.289253	-0.0788813	500
0.348056	-0.0658506	492
0.251254	-0.0211267	506
0.350013	-0.0623705	506
0.109924	-0.00815578	504
0.30872	-0.0901852	496
0.203107	-0.0953722	486
0.339771	-0.022714	484
0.299915	-0.0956511	480
-0.11822	-0.150368	752
-0.171884	-0.198942	754
-0.132444	-0.151428	748
-0.226753	-0.0610671	736
-0.081626	-0.160039	730
-0.151694	-0.186549	726
-0.170297	-0.164695	728
0.191104	0.329118	742
0.261152	0.430948	726
0.217394	0.169655	752
0.233385	0.104831	752
0.23631	0.0852955	752
0.112712	0.181472	754
0.147311	0.145321	754
0.142743	0.155352	752
0.10918	0.237263	750
0.122434	0.222253	750
0.15143	0.202365	750
0.186183	0.145048	754
0.310971	0.125457	754
0.255709	0.163833	748
0.357839	0.206252	744
0.240798	0.162184	744
0.251311	0.16728	742
0.212817	0.112841	746
0.196691	0.127863	746
0.178571	0.139394	742
0.0841634	0.126846	742
0.132589	0.140386	738
0.127225	0.100553	738
0.0780437	0.215136	736
0.177108	0.0784635	736
0.313956	0.101254	734
0.215051	0.235186	728
0.130161	0.15529	730
0.190248	0.158353	728
0.211473	0.157832	726
0.200866	0.135674	724
0.161968	0.125215	724
0.119314	0.0888232	722
0.246764	0.128625	722
0.105468	0.195656	724
0.242515	0.0960458	720
0.129683	0.237777	728
0.0988208	0.218428	742
0.234454	0.179754	744
0.0306831	0.0682773	742
0.19083	0.182067	744
0.295482	0.122382	746
0.300955	0.152872	750
0.221946	0.152469	738
0.315677	0.150374	742
0.18494	0.063392	752
0.251356	0.0273903	754
0.174845	0.0605773	748
0.276014	0.0542908	746
0.227006	0.0104775	744
0.185288	0.0117112	744
0.156615	-0.0366155	742
0.0756058	0.0367704	744
0.199736	0.0734045	746
0.193034	0.0616933	748
0.213443	-0.0101365	734
0.238181	0.0205334	734
0.206966	0.0328894	734
0.264978	0.0241293	736
0.251366	0.0755248	736
0.224588	-0.050478	732
0.177805	0.0258776	728
0.217762	0.000979553	726
0.211428	0.0161874	728
0.293129	-0.000161192	724
0.207781	-0.0367952	720
0.267381	-0.046907	720
0.27365	-0.0279049	722
0.21211	0.0403229	728
0.316304	0.00595172	754
0.301259	0.0228955	720
0.308145	0.0364419	726
0.315961	0.0173778	730
0.411354	0.0238751	736
0.338231	0.0533795	736
0.294144	0.066808	742
0.388805	-0.00174212	748
0.325474	0.0655309	752
0.295676	-0.046349	728
0.269551	-0.0370928	744
0.401896	-0.105302	734
0.316513	-0.261311	746
0.145619	-0.177138	720
0.164804	-0.227052	720
-0.169108	-0.164564	798.61
-0.141612	-0.238664	793.05
-0.0820608	-0.256945	793.05
-0.0289754	-0.108855	795.83
0.0282743	0.0206912	798.61
0.138581	-0.00189463	795.83
0.21817	0.0742477	798.61
0.23758	0.0527676	795.83
0.216503	0.116743	798.61
0.123684	0.141524	798.61
0.12197	0.180691	798.61
0.107966	0.229319	798.61
0.231241	0.165304	795.83
0.24458	0.186804	798.61
0.302109	0.0605101	798.61
0.280799	0.0710283	798.61
0.346835	0.0285996	798.61
0.351774	-0.0306028	798.61
0.298322	-0.118137	795.83
0.277702	-0.0966166	798.61
0.312579	-0.165199	798.61
0.402836	-0.284786	798.61
0.374038	-0.284948	798.61
0.240334	-0.329512	798.61
0.234563	-0.34188	798.61
-0.15002	-0.176361	798.61
0.336945	0.218266	793.05
0.166518	0.184205	793.05
-0.136231	-0.195469	715.831
-0.256619	-0.0924248	713.052
-0.158133	-0.0154583	710.271
-0.144458	-0.149846	710.271
-0.109751	-0.149656	713.051
-0.00712454	-0.0766826	710.27
-0.0236409	0.0481875	707.49
-0.00972588	0.0863733	713.05
0.0392331	0.00956548	713.05
0.0472008	0.0182505	715.83
0.0458229	0.0462313	713.05
0.0347611	0.0358668	710.27
0.0622601	0.077509	715.829
0.124134	0.0274831	707.489
0.173122	0.052061	715.829
0.244025	0.0266924	715.828
0.291096	0.0789397	713.048
0.361609	0.0913888	715.827
0.332184	0.0876006	713.047
0.315332	0.20472	715.827
0.25305	0.15262	713.048
0.168151	0.219747	718.608
0.201631	-0.0349285	713.049
0.363955	-0.176824	713.047
0.253544	-0.380677	713.049
0.224927	-0.374365	713.049
0.219158	0.0738632	718.608
0.338465	-0.0756402	713.048
0.319684	-0.0916894	718.608
0.177716	0.192999	713.048
-0.32974	-0.0373548	627.49
-0.204865	-0.124253	624.71
-0.180572	-0.141199	630.27
-0.151424	-0.228736	633.05
-0.14216	-0.215515	635.83
-0.141518	-0.26328	633.05
-0.104857	-0.250483	627.49
-0.0839424	-0.276041	630.27
-0.0937504	-0.221805	627.49
-0.0722549	-0.183655	635.83
-0.0815769	-0.103341	627.49
-0.00505865	-0.0697043	624.71
-0.11069	-0.0242707	627.49
-0.187036	0.132839	635.83
-0.224803	0.259897	624.71
-0.145864	0.320154	630.27
0.127556	0.203834	633.05
0.207467	0.235347	633.05
0.264485	0.251888	627.49
0.271906	0.268364	633.05
0.187994	0.217816	633.05
0.173875	0.15988	627.49
0.115209	0.143147	627.49
0.157144	0.103316	633.05
0.328387	0.111098	635.83
0.325039	0.078087	635.83
0.388332	0.0569209	633.05
0.374758	0.118921	630.27
0.249351	0.12667	635.83
0.221052	0.0832538	633.05
0.250571	0.0674292	627.49
0.227882	0.00919606	633.05
0.27371	-0.0192894	627.49
0.145929	0.0640934	633.05
0.105014	0.0702959	633.05
0.111538	0.0362762	630.27
0.0353428	0.0256135	633.05
0.033645	-0.00284718	627.49
0.201476	-0.16502	630.27
0.134562	-0.300073	627.49
0.221697	-0.345783	630.27
0.265506	-0.237176	633.05
0.314201	-0.244525	633.05
0.410266	0.0105896	633.05
-0.172016	0.03685	558.61
-0.128116	0.117677	558.61
-0.0872232	0.0806095	555.83
-0.0400562	0.0081721	558.61
-0.0544446	-0.247052	558.61
-0.162602	-0.269514	558.61
-0.141771	-0.278432	558.61
0.233133	-0.241421	558.61
0.246824	-0.237067	558.61
0.0504781	-0.0431206	553.05
0.0139965	0.0366611	553.05
0.134711	0.0409124	553.05
0.142243	0.0675481	558.61
0.205972	0.0351495	555.83
0.216992	0.0535172	558.61
0.240298	0.0358769	555.83
0.237957	0.112058	558.61
0.246576	0.155907	558.61
0.198138	0.211861	558.61
0.134863	0.206112	555.83
0.111064	0.212913	558.61
0.198122	0.187653	555.83
0.319845	0.17386	558.61
0.328128	0.230037	555.83
0.296224	0.247546	555.83
0.218689	0.211379	555.83
0.327884	0.166914	558.61
0.343922	0.159065	555.83
0.380788	-0.149242	558.61
0.382019	-0.220945	558.61
0.303435	-0.348553	558.61
0.27784	-0.364155	558.61
0.0106856	0.0806312	475.83
-0.254393	0.21165	478.61
-0.323885	0.0595521	475.83
-0.156736	-0.212414	478.61
-0.0809856	-0.158384	478.61
-0.0938533	-0.242694	475.83
-0.0541162	-0.227039	478.61
-0.0425515	-0.228449	478.61
-0.00514519	-0.199924	478.61
-0.0889753	-0.293484	478.61
0.206707	-0.322019	478.61
0.290591	-0.393902	478.61
0.274575	-0.280169	478.61
0.329033	-0.298564	475.83
0.383449	-0.115651	478.61
0.403294	-0.104288	478.61
0.359205	0.038049	478.61
0.265993	0.0390941	478.61
0.294091	0.0121658	475.83
0.278006	-0.0409258	478.61
0.249725	-0.0721671	478.61
0.0360313	0.012101	478.61
0.0623217	0.130211	478.61
-0.0158992	-0.00442349	478.61
0.0924125	0.0791975	475.83
0.11231	0.0884009	478.61
0.125486	0.186251	478.61
0.149289	0.219173	475.83
0.244338	0.179047	478.61
0.251631	0.138345	478.61
0.26135	0.10788	478.61
0.276933	0.141809	478.61
0.26485	0.203235	478.61
0.318207	0.176337	475.83
0.288047	0.221859	478.61
0.205739	0.0681236	478.61
0.212384	0.121511	478.61
0.368023	0.229978	475.83
-0.275839	-0.0767068	390.27
-0.0840144	-0.214398	395.83
-0.0392921	-0.33252	393.05
-0.0285427	-0.252421	387.49
-0.0569539	-0.0609311	384.71
0.00204641	-0.0676809	387.49
0.263707	-0.271406	393.05
0.302858	-0.219385	393.05
0.353115	-0.304096	390.27
0.281614	-0.176319	390.27
0.288024	-0.326403	395.83
0.275901	-0.357617	393.05
0.385893	0.00136917	393.05
0.325869	-0.0354326	390.27
0.235064	-0.00102508	390.27
0.246599	0.00117623	390.27
0.284382	0.0276408	390.27
0.186001	0.0216203	393.05
0.170665	-0.0154561	387.49
0.143051	0.077434	387.49
0.107345	0.0952718	393.05
0.0942886	0.060186	390.27
0.0651381	0.0914553	390.27
0.140276	0.128895	393.05
0.160529	0.109257	390.27
0.257651	0.134754	387.49
0.26525	0.112181	393.05
0.225327	0.229818	393.05
-0.188449	0.0276941	318.609
-0.19889	0.0942816	310.27
-0.10121	-0.26216	310.268
-0.183806	-0.230929	313.048
-0.0834571	-0.128792	307.489
-0.026955	-0.203776	313.049
0.122386	0.0788765	313.051
0.141809	0.0398392	315.831
0.195175	0.0691844	310.272
0.177249	0.068364	313.052
0.188691	0.135609	313.052
0.197945	0.153947	307.492
0.202281	0.199383	313.053
0.251446	0.184353	307.493
0.24685	0.231032	315.833
0.284051	0.162097	307.493
0.253345	0.122467	310.272
0.299648	0.107117	310.272
0.295911	0.0440173	310.272
0.282337	0.00782031	313.052
0.359338	0.072854	313.053
0.303816	0.0145494	315.832
0.240574	-0.0611675	318.611
0.225163	-0.183868	313.05
0.22862	-0.208529	313.05
0.279693	-0.222872	315.83
0.284494	-0.294694	315.83
0.308144	-0.124927	310.271
0.423423	-0.0314722	315.832
0.214763	0.132946	310.272
-0.142671	0.057265	235.83
-0.0659843	0.00719664	233.05
-0.167224	0.170005	233.05
-0.0350128	-0.0615051	230.27
-0.0375355	-0.0855066	230.27
-0.0781566	-0.172974	235.83
-0.10894	-0.1317	227.49
-0.108258	-0.226329	238.61
-0.0697681	-0.234235	235.83
-0.196035	-0.145687	230.27
0.15063	0.0427732	235.83
0.112285	0.0327789	235.83
0.0669105	0.0654321	233.05
0.0387438	0.0203363	235.83
0.182	-0.000479456	235.83
0.204731	0.0924107	233.05
0.129304	0.186549	235.83
0.103154	0.156027	230.27
0.231177	0.165448	230.27
0.188391	0.18027	233.05
0.258854	0.142663	235.83
0.254739	0.111045	233.05
0.285307	0.116134	230.27
0.281322	0.249377	238.61
0.320584	0.0266071	233.05
0.340894	0.00207947	235.83
0.255844	1.1602e-05	238.61
0.376196	-0.1091	235.83
0.298037	-0.255386	235.83
0.263798	-0.22695	235.83
0.233561	-0.306988	233.05
0.32901	-0.382121	238.61
-0.276493	0.18325	155.822
-0.135443	0.274242	150.271
-0.24149	0.00909393	150.26
-0.141228	-0.173249	150.261
-0.160417	-0.240076	150.259
-0.131747	-0.310004	150.259
-0.0592594	-0.18265	150.264
-0.0347679	-0.105253	155.827
-0.107471	-0.0231843	150.265
0.183512	0.00516302	150.278
0.279367	-0.0208881	153.062
0.25099	-0.00419312	153.061
0.20809	-0.0621063	150.278
0.260936	-0.239118	150.277
0.255323	-0.280129	153.056
0.30536	-0.32961	153.058
0.338002	-0.364081	155.839
0.319137	-0.00956234	150.284
0.340177	0.0227061	155.845
0.348085	0.0461425	153.066
0.374603	0.0366344	155.847
0.329984	0.0760333	153.066
0.375663	0.133286	153.069
0.203337	0.130573	155.842
0.235079	0.0996087	155.843
0.224337	0.0812529	153.062
0.271249	0.0545978	150.283
0.123457	0.107399	150.278
0.105182	0.0636393	150.276
0.105752	0.0870871	150.277
0.0699011	0.0306195	153.054
0.039009	0.0291817	150.272
0.134889	0.0123163	153.056
-0.104937	-0.272759	147.481
0.21582	0.212239	70.27
0.209422	0.138818	73.05
0.235998	0.155019	78.61
0.257785	0.154927	70.27
0.296881	0.141738	75.83
0.31965	0.056573	75.83
0.345791	0.0701605	73.05
0.26837	-0.0382004	70.27
0.250466	-0.0306166	75.83
0.243273	-0.0623552	73.05
0.196166	-0.0230639	70.27
0.160415	-0.160074	73.05
0.197434	-0.158238	73.05
0.321775	-0.182118	73.05
0.291484	-0.268031	73.05
0.230895	-0.355724	75.83
0.263256	-0.373497	75.83
-0.0699253	-0.175403	75.83
-0.0936683	-0.123057	70.27
-0.0823445	-0.231961	70.27
-0.066173	-0.241204	73.05
-0.0312167	-0.155372	75.83
-0.0498694	-0.296449	70.27
-0.0887278	-0.369863	78.61
0.149259	0.0373083	73.05
0.316332	-0.30897	70.27
-0.0984533	-0.0967555	9.73
-0.116303	0.210645	9.73
0.11023	0.0466184	9.73
0.164368	-0.0260167	12.51
0.177907	0.0485715	15.29
0.215961	0.0492267	12.51
0.247379	-0.00508548	12.51
0.264793	0.0122054	15.29
0.26357	0.101556	12.51
0.233774	0.132721	12.51
0.238183	0.153316	15.29
0.233989	0.176248	12.51
0.20713	0.169187	15.29
0.197141	0.117538	12.51
0.232234	0.229852	15.29
0.280426	0.199191	12.51
0.259159	0.169679	12.51
0.208069	0.0829751	12.51
-0.154428	-0.0748826	92.51
-0.117834	-0.060704	95.29
0.0938381	0.0844569	92.51
0.0817057	0.175642	89.73
0.150703	0.0620651	89.73
0.135608	0.0132068	95.29
0.111988	-0.0275022	95.29
0.170362	-0.0382114	95.29
0.220099	-0.0106886	89.73
0.199853	0.0425759	92.51
0.223085	0.0409325	92.51
0.243258	-0.0121213	92.51
0.259996	-0.0103866	92.51
0.29235	0.00495917	92.51
0.330083	0.00612436	95.29
0.237249	0.159973	92.51
0.198123	0.227093	92.51
0.379536	-0.0569662	92.51
0.254979	-0.265465	92.51
0.307472	-0.292975	92.51
0.207184	0.108133	92.51
-0.0787614	-0.0774622	175.29
0.096896	0.0273221	175.29
0.145391	0.012363	169.73
0.199653	-0.068068	172.51
0.141777	-0.0861218	175.29
0.237314	-0.292174	172.51
0.283287	-0.346178	172.51
0.186426	0.0264338	169.73
0.116993	0.114604	172.51
0.0931321	0.289102	175.29
0.229278	0.155806	172.51
0.25135	0.120829	169.73
0.253998	0.104812	169.73
0.28691	0.0963346	172.51
0.314313	0.0764759	169.73
0.350065	0.0699081	172.51
0.330038	0.140435	169.73
0.393884	0.0907443	169.73
0.243928	-0.0438253	249.73
0.218953	-0.147209	252.51
0.288251	-0.192376	249.73
0.399981	-0.266288	252.51
0.401047	-0.219639	249.73
0.384449	-0.139369	252.51
0.309773	-0.310533	252.51
0.246572	-0.323873	252.51
0.159759	-0.0770803	252.51
0.10954	-0.0989276	252.51
0.0658793	0.0131101	252.51
-0.0360114	0.0211447	252.51
-0.0479482	0.0508859	255.29
0.125414	0.127686	249.73
0.145926	0.0969217	252.51
0.162126	0.0698338	255.29
0.193517	0.101331	255.29
0.168288	0.252509	249.73
0.237566	0.17551	252.51
0.230075	0.0980052	252.51
0.258354	0.0861316	252.51
0.250814	0.00388522	249.73
0.206857	-0.0305179	252.51
0.324055	-0.0234288	252.51
0.245056	0.0799906	252.51
0.220823	0.0755992	252.51
0.310928	0.197352	246.95
0.143152	0.127871	332.51
0.136555	0.154951	332.51
0.107081	0.136743	329.73
0.151288	0.0792723	329.73
0.165172	0.0375234	329.73
0.0491066	0.0755834	332.51
0.133502	0.297414	329.73
0.23619	0.194387	332.51
0.224073	0.30057	332.51
0.280471	0.125694	329.73
0.28235	0.157166	332.51
0.206597	0.109256	332.51
0.261498	0.0454796	329.73
0.316301	-0.021826	329.73
0.332603	-0.0535414	329.73
0.386436	-0.0395917	329.73
0.259265	-0.320858	329.73
0.343282	-0.328886	329.73
0.262651	-0.230787	329.73
0.285138	0.17593	412.51
0.275198	0.151229	415.29
0.271847	0.111284	412.51
0.246358	0.0964109	409.73
0.253869	0.0706283	412.51
0.259328	0.0418453	412.51
0.205452	0.117235	409.73
0.20957	0.0151229	409.73
0.13938	0.120866	409.73
0.0869044	0.0866147	412.51
0.074493	0.0206773	409.73
0.0466561	-0.00610421	412.51
0.0161083	0.00739262	409.73
0.113948	-0.0507442	412.51
0.0232173	0.01562	412.51
-0.00475499	-0.0971552	412.51
-0.17677	0.244103	409.73
0.313909	-0.169528	412.51
0.289922	-0.195484	412.51
0.333299	-0.189421	409.73
0.258037	-0.107437	412.51
0.225356	-0.0598795	409.73
0.177306	-0.0370123	412.51
0.20057	0.196777	412.51
0.183239	-0.124891	495.29
0.200616	-0.0826203	511.97
0.139832	-0.127668	492.51
0.120008	-0.118709	495.29
0.170958	-0.290521	492.51
0.202781	-0.298717	492.51
0.268929	-0.378228	511.97
0.327899	-0.261192	511.97
0.349468	-0.179509	509.19
0.379559	-0.0693711	511.97
0.27023	0.0854145	509.19
0.26045	0.130074	509.19
0.24383	0.0428357	509.19
0.274241	0.0202555	511.97
0.228642	0.0180458	509.19
0.199386	0.022906	509.19
0.206908	0.0387571	492.51
0.17078	0.0487167	506.41
0.1546	-0.000975727	509.19
0.105345	-0.00319181	506.41
0.117627	0.0690635	509.19
0.0751157	0.0825016	492.51
0.0672852	0.0575749	509.19
0.0639003	0.114734	495.29
0.117527	0.126809	495.29
0.0911852	0.190941	495.29
0.214108	0.221216	495.29
0.228726	0.220387	495.29
0.265535	0.184835	492.51
0.251495	0.201549	495.29
0.282682	0.287825	498.07
0.226463	0.140324	506.41
0.244985	0.133149	495.29
0.238609	-0.0825135	511.97
-0.123491	-0.192382	492.51
-0.0540624	-0.163929	495.29
-0.00806377	-0.0920607	492.51
0.00178811	-0.127452	509.19
-0.169572	0.105371	492.51
-0.185364	-0.0192696	489.73
0.23842	-0.192198	511.97
0.1357	-0.0946988	509.19
0.241568	0.231658	566.95
0.228537	0.188746	569.73
0.232447	0.162473	566.95
0.226101	0.143876	569.73
0.229924	0.125811	569.73
0.196679	0.127002	569.73
0.189868	0.166249	569.73
0.152334	0.207939	569.73
0.0813307	0.18715	566.95
0.0726953	0.262022	569.73
0.124474	0.075054	566.95
0.131194	0.045885	569.73
0.163193	0.0365901	569.73
0.0769227	0.0395641	569.73
0.00715497	-0.0519173	572.51
0.113509	-0.211209	569.73
0.255232	-0.248218	575.29
0.281677	-0.110314	569.73
0.328269	-0.311277	569.73
0.333202	-0.280884	572.51
0.336241	-0.0642847	572.51
0.385903	-0.0218178	569.73
0.299929	0.0492781	569.73
0.331815	0.0973129	569.73
-0.120322	-0.107853	652.51
0.0388712	-0.0119393	652.509
0.0547685	0.00549825	652.509
0.139813	-0.0320223	652.509
0.246556	-0.304389	652.51
0.27869	-0.0747449	655.289
0.293456	0.00742226	652.509
0.271171	0.0902574	655.289
0.261152	0.148387	649.728
0.220668	0.180708	649.728
0.287915	0.25588	652.508
0.251812	0.205725	652.508
0.349105	0.0787839	652.509
0.367332	-0.0308695	652.509
0.127305	0.0952168	649.729
0.0981153	0.13966	652.509
0.10829	0.160614	652.509
0.157187	0.0689242	649.729
0.176528	0.0301987	652.509
-0.21387	-0.116115	735.29
-0.0934695	-0.104391	735.29
0.124748	-0.0919629	735.29
0.244081	-0.177858	732.51
0.366285	-0.279396	735.29
0.392162	-0.210872	732.51
0.345855	-0.0687365	732.51
0.292268	-5.29242e-05	732.51
0.302786	0.0426574	732.51
0.259979	0.104032	732.51
0.257419	0.0846007	732.51
0.246407	0.126213	732.51
0.226539	0.126404	732.51
0.200809	0.109791	732.51
0.213788	0.0454466	729.73
0.225385	0.0440524	732.51
0.214724	-0.0421775	732.51
0.184566	-0.0277276	735.29
0.186332	0.00811147	732.51
0.163323	0.0543639	729.73
0.163875	0.0861508	732.51
0.152283	0.0856144	732.51
0.115991	0.119688	732.51
0.0850373	0.142685	732.51
0.0917809	0.0686876	732.51
0.0767373	0.212871	5.92993
0.0977784	0.141465	8.11952
0.103123	0.19466	7.78438
0.146761	0.0484996	5.70328
0.150667	0.126214	7.21783
0.228738	0.12917	10.2882
0.234995	0.163412	8.96146
0.194574	0.0516684	7.71244
0.201325	-0.0584884	8.32591
0.205509	0.0864973	10.0732
0.221185	-0.047674	10.339
0.222453	-0.185214	7.02819
0.229994	-0.31224	7.49631
-0.207498	-0.26721	18.07
-0.164176	-0.221878	11.7448
-0.109709	-0.230385	15.0829
-0.191757	-0.26203	18.07
0.192295	0.120881	13.4917
0.309125	0.153281	13.0822
0.210204	0.0659682	11.8376
0.32881	-0.063813	14.9286
0.319678	-0.32584	14.4372
-0.110299	0.0198061	90.5341
-0.148141	-0.15835	88.346
0.048523	0.236476	86.8535
0.102176	0.193102	89.3888
0.0732863	0.063383	81.39
0.108978	0.0658666	81.39
0.0796645	0.101772	86.4728
0.0947602	0.0937997	87.6115
0.109014	-0.0248262	87.6299
0.129924	0.0705803	86.393
0.0688089	0.0116905	90.5455
0.112176	0.105459	88.5653
0.143102	0.04073	89.2692
0.180489	0.129591	85.5314
0.174782	0.143723	87.844
0.17774	0.179373	90.0384
0.236586	0.152098	90.9491
0.294378	0.096183	89.8567
0.31848	-0.0352585	81.39
0.206055	-0.337105	89.7177
0.262109	-0.349926	90.7869
0.329599	-0.0446588	87.4006
0.337451	-0.0258263	87.3786
0.0283543	0.0149796	92.6823
0.134109	0.106141	93.0647
0.0072565	-0.0515876	95.9755
0.158291	-0.0229787	95.2206
0.18298	0.168045	93.8843
0.227188	0.231268	93.0257
0.221157	0.130519	95.0599
0.17532	0.0441647	94.7174
0.230978	0.0687682	98.07
0.225348	-0.283233	98.07
-0.181273	0.0221083	161.39
-0.177533	0.0372871	161.39
0.00109005	-0.065802	161.39
-0.153407	-0.183318	165.977
-0.14628	-0.189881	168.561
0.0885257	0.216406	161.39
0.194328	0.134393	161.39
0.208034	0.175614	161.39
0.0905954	0.183914	163.331
0.195803	0.162843	166.218
0.196615	0.215595	169.615
0.129702	0.0938097	161.39
0.141583	0.051624	161.39
0.204081	0.0291885	161.39
0.0836865	-0.211358	161.39
0.233909	0.171158	161.39
0.235789	0.1394	161.39
0.290905	0.0793277	167.89
0.27257	-0.0482042	169.314
0.36912	-0.204133	162.929
0.190319	0.145829	247.197
0.0364603	0.0304776	241.39
0.0442932	0.0741191	241.39
0.17204	0.0371428	247.763
0.181893	0.0727042	246.019
0.186729	0.102695	247.867
0.191787	0.0062405	246.936
0.197289	0.118912	247.377
0.217489	0.0879817	246.113
0.132434	-0.172076	246.288
0.256825	0.0365056	246.238
0.307718	0.0110821	247.985
0.243834	-0.0123149	249.937
0.323361	0.0415702	249.486
0.403379	-0.156639	247.776
0.356243	-0.373163	248.425
-0.349518	0.200899	254.283
0.0169914	0.0278621	256.485
0.0925265	0.0611413	252.857
0.101576	0.119201	252.401
0.223367	0.112437	251.803
0.308045	0.150751	254.251
0.261191	-0.0889961	254.663
0.257914	-0.255199	252.506
-0.139748	-0.227262	321.39
-0.122067	-0.246837	321.39
-0.120363	-0.21768	327.689
-0.121761	-0.198144	330.602
0.119424	0.132226	321.39
0.127472	0.169292	321.39
0.10844	0.193739	324.631
0.0735312	0.102591	321.39
0.0927681	0.0910355	321.39
0.103959	0.119863	321.39
0.124309	0.106999	321.39
0.132641	0.0717513	321.39
0.139377	0.0457439	321.39
0.172742	0.16987	321.39
0.200694	0.180735	321.39
0.229673	0.156907	326.397
0.157691	0.0359691	321.39
0.164328	0.0697025	321.39
0.20941	0.106773	321.39
0.21431	0.127342	321.39
0.276632	0.0906806	321.39
0.165886	0.0973067	325.219
0.189728	0.0467659	327.348
0.146211	0.0951621	328.457
0.224661	-0.116198	321.39
0.291717	-0.356363	321.39
0.329504	0.0433424	321.39
0.370543	0.106324	321.39
0.393698	-0.187565	321.39
-0.117752	-0.176091	401.39
-0.122823	-0.147335	406.086
-0.0999934	-0.150899	406.684
0.0557442	0.190985	401.39
0.13405	0.172278	401.39
0.0634169	0.154757	403.133
0.0677657	0.0942068	401.39
0.0912004	0.0257999	401.39
0.153747	0.0336212	401.39
0.16555	0.0729623	401.39
0.175688	0.0262437	401.39
0.0870619	0.0451671	404.476
0.165058	0.136193	404.188
0.19933	0.174414	401.39
0.199663	0.0744795	401.39
0.215159	0.0335941	401.39
0.215817	0.125475	401.39
0.238712	0.117751	401.39
0.276316	0.0718061	401.39
0.287335	-0.0121026	401.39
0.276006	0.0174571	404.244
0.257709	-0.241602	401.39
0.308031	-0.232243	401.39
0.217163	-0.201187	404.15
0.304596	-0.349708	401.39
0.386164	-0.0641033	401.39
-0.124125	-0.1209	481.39
0.13164	0.212178	481.39
0.163228	0.195411	481.39
0.053259	0.168506	481.39
0.0721967	0.160551	481.39
0.0944795	0.124049	481.39
0.109226	0.0492484	481.39
0.11264	0.161093	481.39
0.12371	0.168165	481.39
0.129843	0.0356938	481.39
0.167653	0.0201023	481.39
0.167942	0.0579879	481.39
0.16985	0.080507	481.39
0.170913	0.131546	481.39
0.174927	0.118618	481.39
0.18966	-0.0186585	481.39
0.114293	-0.110758	481.39
0.170375	-0.146013	481.39
0.187499	0.112333	481.39
0.195308	0.0599429	481.39
0.204399	0.0517256	481.39
0.211968	-0.00249357	481.39
0.223404	0.0683374	481.39
0.196114	-0.0526571	481.39
0.211172	-0.175891	481.39
0.249385	-0.327051	481.39
0.248691	-0.0651318	481.39
-0.220383	-0.263967	561.39
0.0504781	0.175023	561.39
0.0812883	0.198532	561.39
0.0875603	0.189429	561.39
0.0940082	0.215908	561.39
0.108836	0.207569	561.39
-0.00813359	-0.0874773	561.39
0.045572	0.0102278	561.39
0.0515126	-0.00802263	561.39
0.0642316	0.030122	561.39
0.0796762	0.077761	561.39
0.108788	0.123274	561.39
0.111202	0.0326046	561.39
0.166168	0.360431	561.39
0.12181	0.19971	561.39
0.128922	0.328177	561.39
0.137686	0.175133	561.39
0.184944	0.178185	561.39
0.198016	0.155852	561.39
0.232279	0.209632	561.39
0.133291	0.0464699	561.39
0.140983	0.132992	561.39
0.146741	0.075022	561.39
0.163909	0.058591	561.39
0.181148	0.139229	561.39
0.183553	-0.00708865	561.39
0.187335	0.0868301	561.39
0.20506	0.11975	561.39
0.214809	-0.0881007	561.39
0.22491	-0.0201316	561.39
0.225689	0.0765514	561.39
0.265496	0.0929588	561.39
0.150933	-0.284407	561.39
0.212044	-0.2443	561.39
0.29544	-0.135932	561.39
0.339139	-0.192958	561.39
-0.0360591	-0.0908131	645.327
-0.0521705	-0.117034	647.284
-0.0635648	-0.137202	649.056
-0.108443	-0.176974	645.929
0.0954266	0.0470993	641.39
0.0889573	0.0766074	643.257
-0.00277875	0.0655186	647.701
0.0444704	0.0167134	651.032
0.0754438	0.0344269	648.561
0.0823365	0.0845374	650.132
0.147567	0.0230541	651.058
0.240188	0.145333	647.518
0.193913	0.116543	650.337
0.215498	0.124688	648.979
0.238092	0.100052	650.191
0.305789	-0.0340684	641.39
0.27998	0.0479458	648.223
0.218233	-0.0799291	649.651
0.235646	-0.28285	647.384
0.219813	-0.319314	649.899
0.33565	-0.135399	641.39
0.363429	-0.0454372	646.142
-0.191776	-0.0770256	651.471
0.0514177	0.138113	652.701
0.0750901	0.1873	651.637
0.106603	0.0249178	651.957
0.144479	-0.0240075	651.779
0.210576	0.170344	651.986
0.249074	0.173799	651.597
0.161465	-0.053784	652.371
-0.163816	-0.00461078	727.239
0.13816	0.0757518	721.39
0.173386	0.0944395	724.752
0.0131648	-0.0124988	727.069
0.071176	0.106296	726.869
0.117501	0.0329634	726.973
0.155254	0.0139517	726.17
0.0727324	0.035695	729.552
0.124987	0.0434578	729.967
0.175019	0.0153623	728.885
0.247183	0.137735	727.488
0.206253	0.0472606	728.203
0.211569	0.0317813	725.675
0.275424	0.0814201	726.922
0.291383	0.115573	728.808
0.328773	-0.302118	727.043
0.221499	-0.23903	729.812
0.286098	-0.276951	730.635
-0.200355	-0.187202	735.129
0.0591403	0.0135482	731.909
0.21246	0.142769	731.656
0.209625	0.0888302	731.499
0.197425	0.0135817	12.51
0.169383	-0.00586584	4.17
0.18776	-0.0214066	15.29
0.198121	0.0403892	6.95
0.23061	0.0861804	12.51
0.285846	0.217922	12.51
0.178928	0.131821	9.73001
0.172374	0.171111	9.73001
0.325177	-0.0428481	4.17
0.115783	0.156931	12.51
0.124561	0.341993	12.51
0.124543	0.0714549	4.17
-0.0981986	-0.221307	6.94999
0.19025	-0.27225	92.51
0.0737045	0.156362	89.73
0.0631564	0.207493	86.95
0.16008	0.141395	86.95
0.188636	0.120525	86.95
0.186451	0.0970043	89.73
0.162583	0.112122	84.17
0.114577	0.152837	84.17
0.0582198	0.0509606	84.17
0.149083	0.0541229	92.51
0.168575	0.0459676	86.95
0.158097	0.00716772	92.51
-0.132261	-0.146775	89.73
-0.0612704	-0.158546	92.51
0.2559	0.178078	86.95
0.192607	0.24227	84.17
0.0856268	0.171152	161.39
0.0729873	0.167673	161.39
0.24223	0.233231	166.95
0.183655	0.113513	161.39
0.0828146	0.0924283	161.39
0.142368	0.126965	172.51
0.162665	0.00386901	164.17
0.32905	-0.0118268	169.73
0.260076	-0.165066	169.73
0.24923	-0.315917	169.73
-0.0818524	-0.184833	172.51
0.085152	0.0682804	164.17
0.0983128	0.154172	166.95
0.214874	0.129121	175.29
0.252923	-0.331868	246.95
0.196333	-0.0340922	244.17
0.176946	-0.0338914	244.17
0.154557	0.0178687	249.73
0.125539	0.0558118	246.95
0.087467	0.164826	241.39
0.0496407	0.138701	246.95
-0.0876634	-0.102047	329.731
-0.108803	0.218239	326.951
0.0629194	0.156712	324.171
0.0501711	0.0147712	321.391
0.11842	0.0397232	321.391
0.113273	0.054162	324.171
0.121973	0.177867	329.731
0.125731	0.171044	329.731
0.185905	0.154351	335.291
0.204566	0.0814022	329.731
0.145917	0.0690685	324.171
0.160511	0.0747451	324.171
0.292977	0.0128933	329.731
0.382773	-0.0696359	329.731
0.209509	-0.260535	324.171
0.202679	-0.113066	321.391
0.257695	-0.315297	329.731
0.12198	-0.0272836	329.731
0.25038	-0.209001	324.171
-0.00919872	-0.0526134	398.004
0.0912623	0.0380513	395.224
0.0947059	0.0481082	398.004
0.140278	0.0287718	395.224
0.0517821	0.169109	396.242
0.0809685	0.143085	400.941
0.233421	0.047198	398.004
0.264582	-0.0539733	398.004
0.237828	-0.1101	400.784
0.279077	-0.0738357	395.224
0.239191	-0.283503	398.004
0.190773	-0.219892	395.224
0.315191	-0.341429	398.004
0.188084	0.00344993	395.224
0.230234	-0.0988854	489.73
0.248046	-0.0310556	489.73
0.166865	0.100959	492.51
0.18238	0.0607586	489.73
0.220721	0.115467	495.29
0.228817	0.111225	495.29
0.187743	0.146255	495.29
0.107938	0.223692	492.51
0.0993429	0.0965752	484.17
-0.251569	0.128671	490.555
0.138735	0.170953	572.51
0.0802861	0.0997092	572.51
0.110208	0.0342996	578.07
-0.00161406	-0.0612782	569.73
-0.118914	-0.20593	569.73
0.222344	-0.0768383	568.728
0.138776	-0.0171481	578.07
0.227503	-0.282637	577.154
0.252557	-0.358811	571.904
0.173713	0.0616912	578.07
0.160017	0.220304	570.453
0.186908	0.182347	649.73
0.0945605	0.164739	649.73
0.074422	0.0628174	655.29
0.120003	0.0649121	649.73
0.239903	0.114025	649.73
0.25535	0.122911	652.51
0.265478	0.0604133	649.73
0.18967	-0.0709796	649.73
0.153291	-0.022665	649.73
0.167309	-0.00539883	655.29
0.127158	0.0224049	649.73
0.0743782	0.0201228	649.73
0.287226	-0.312996	653.807
0.0710069	0.137895	732.509
0.0843818	0.12362	724.169
0.139869	0.0814273	729.729
0.0763123	0.096298	732.509
0.155982	0.0690965	729.729
0.192368	0.123127	729.729
0.191399	0.0322146	724.169
0.195797	0.00982017	724.169
0.143536	0.00502268	721.389
0.130067	0.0156749	724.169
0.160527	-0.0351139	729.73
0.23967	-0.122824	729.73
0.218792	-0.261698	732.564
0.00747383	-0.087876	726.95
0.391739	-0.157465	1.62
0.34719	0.0391595	1.62
0.342998	-0.00994794	1.62
0.330878	0.0447289	1.62
0.353516	0.0067979	8.8673
0.232477	-0.207971	1.62
0.226466	-0.23317	1.62
0.277133	-0.306979	5.28079
0.302263	0.067155	1.62
0.284736	0.0479166	1.62
0.302052	-0.0653384	4.74288
0.284002	0.0175787	3.96603
0.220956	0.0762247	5.92438
0.160593	-0.0701513	8.97987
0.314258	0.1617	1.62
0.307851	0.12247	1.62
0.266864	0.172216	1.62
0.2453	0.151583	1.62
0.244562	0.170272	1.62
0.242678	0.136987	1.62
0.228176	0.116165	1.62
0.227066	0.128306	1.62
0.221331	0.146875	1.62
0.213973	0.180541	1.62
0.207008	0.225256	1.62
0.194289	0.160057	1.62
0.191504	0.228723	1.62
0.183371	0.150652	1.62
0.173157	0.168676	1.62
0.245815	0.190728	4.13402
0.224235	0.205611	4.63869
0.268556	0.205749	8.63915
0.206637	0.264048	9.44481
0.203398	0.152208	6.80187
0.181284	0.235649	10.3759
0.124676	0.060674	1.62
0.119687	0.0547398	1.62
0.0519673	-0.127545	1.62
0.0452779	0.035854	1.62
0.0375116	-0.0140044	1.62
0.0321959	0.00381406	5.41665
0.0493475	0.0135432	8.03149
0.127518	0.187979	1.62
0.0721469	0.121867	1.62
0.0612527	0.188313	1.62
0.103382	0.311153	4.44261
0.0795955	0.198516	5.82704
0.108644	0.148238	7.14136
0.0397325	0.100288	7.35935
-0.080157	-0.150751	1.62
-0.0843293	-0.193371	1.62
-0.135075	-0.143937	1.62
-0.0837388	-0.0828102	3.99956
-0.0770967	0.0607503	9.49187
-0.0753706	-0.0851436	10.3814
0.344399	-0.0308351	91.0445
0.327729	0.144794	87.548
0.214037	-0.223349	84.5291
0.266555	0.0570889	81.62
0.266222	-0.0517313	81.62
0.259768	0.0417823	81.62
0.244981	-0.139351	81.62
0.237189	0.0310597	81.62
0.231657	-0.00560009	81.62
0.227428	0.0256935	81.62
0.217392	0.00835244	81.62
0.186224	0.0231001	81.62
0.178813	-0.209788	81.62
0.177474	0.0508872	89.7111
0.3219	0.0434241	90.4575
0.2676	0.149815	81.62
0.251299	0.202533	81.62
0.250128	0.154625	81.62
0.244896	0.135292	81.62
0.230346	0.130669	81.62
0.227501	0.158246	81.62
0.221185	0.218108	81.62
0.217936	0.249994	81.62
0.205554	0.13811	81.62
0.194414	0.155945	81.62
0.183472	0.163227	81.62
0.172796	0.161318	81.62
0.166208	0.204371	81.62
0.164744	0.135361	81.62
0.14583	0.19959	81.62
0.137205	0.131196	84.452
0.319725	0.14457	89.3848
0.285285	0.104306	88.6296
0.274282	0.0903725	88.6295
0.23436	0.206092	89.5683
0.227401	0.197765	88.0611
0.213966	0.195453	88.5771
0.20045	0.176601	87.7751
0.15293	0.0801168	89.939
0.178203	0.347259	84.655
0.13858	0.33601	87.341
0.124214	0.0556856	81.62
0.0986758	0.0420709	81.62
0.0648968	0.0324694	81.62
0.0106297	-0.0890743	92.5051
0.130169	0.107535	81.62
0.120018	0.0723952	81.62
0.116894	0.154121	81.62
0.0997799	0.0795292	81.62
0.0689049	0.141998	81.62
0.000957468	0.067036	81.62
0.109501	0.0894996	83.8539
0.0930128	0.190011	83.287
0.124454	0.300523	87.4867
-0.072343	-0.167963	81.62
-0.106229	-0.131825	81.62
-0.108898	-0.193744	81.62
-0.161745	-0.21937	81.62
-0.20832	-0.0965301	81.62
-0.20039	0.0851978	87.128
0.34134	-0.120422	161.62
0.282358	-0.218742	161.62
0.283446	0.0815238	161.62
0.255406	0.0623632	161.62
0.21896	0.0718213	161.62
0.209598	0.0329054	161.62
0.199552	-0.123727	161.62
0.19437	0.0733538	161.62
0.18318	0.0933207	161.62
0.134388	-0.0464747	161.62
0.286643	0.0388457	163.275
0.191268	0.021636	164.504
0.285089	0.123143	161.62
0.270757	0.0985653	161.62
0.255231	0.281548	161.62
0.242435	0.143304	161.62
0.235901	0.0975178	161.62
0.217263	0.196508	161.62
0.216652	0.184204	161.62
0.208002	0.118011	161.62
0.193296	0.226641	161.62
0.17699	0.189631	161.62
0.173795	0.136566	161.62
0.24012	0.117474	163.606
0.212163	0.161438	165.739
0.207111	0.193079	164.322
0.187191	0.231647	164.539
0.146002	0.226985	164.501
0.118035	0.0161222	161.62
0.105562	0.060063	161.62
0.097878	0.0904676	161.62
0.0587217	0.0298276	161.62
0.114496	0.176996	161.62
0.0765964	0.10362	161.62
0.0733373	0.274722	161.62
0.0732143	0.216528	161.62
0.0695238	0.115184	165.147
0.0500897	0.15516	163.561
-0.0939571	-0.269206	161.62
-0.136632	-0.21498	161.62
0.295964	0.030088	240.7
0.336956	-0.0376184	242.762
0.307223	0.0511794	244.678
0.236671	-0.296334	251.189
0.292421	-0.270539	242.046
0.284744	-0.262019	242.009
0.256624	-0.0148425	237.895
0.245718	-0.00650873	237.911
0.241069	0.0156074	237.58
0.225112	-0.0370564	238.795
0.256462	0.0344083	241.655
0.210139	-0.0023406	244.019
0.248641	-0.27085	252.096
0.153763	-0.0441782	249.788
0.184655	0.157271	235.887
0.179127	0.120703	236.637
0.141642	0.190452	235.955
0.130431	0.129664	237.233
0.116478	0.202162	239.416
0.269329	0.285367	238.339
0.173621	0.0993933	243.842
0.140009	0.141982	244.697
0.150749	0.0735256	247.433
0.0179441	-0.100575	243.193
0.0899346	-0.116275	250.162
0.0702422	0.0324149	246.382
0.0622267	-0.0761177	250.505
0.0322924	0.025376	250.642
0.09568	0.0801609	238.674
0.0886776	0.144921	237.607
0.0536119	0.227067	236.662
0.1128	0.113099	241.117
0.0971635	0.109949	241.21
0.0047742	0.0835474	242.797
0.107673	0.263631	242.024
0.0417258	0.132269	246.372
-0.0948672	-0.314411	250.595
-0.180735	-0.0791673	252.188
-0.133992	0.220386	239.46
-0.0820789	0.145651	247.228
-0.322285	0.254419	248.814
0.319469	0.0993051	326.961
0.296577	0.293548	328.623
0.298689	0.152857	327.808
0.322615	0.237321	330.998
0.308822	-0.314605	325.102
0.237228	0.0609497	321.62
0.196944	0.0929567	321.62
0.148188	0.0950742	321.62
0.131403	0.0872127	321.62
0.283009	-0.00254959	324.314
0.280974	0.0169001	326.418
0.259431	-0.022309	325.766
0.246686	0.0615942	323.717
0.236881	0.0249975	324.219
0.216796	0.025144	324.465
0.205648	0.0380675	325.116
0.182618	0.016777	323.952
0.254769	0.120433	325.302
0.201255	0.212772	325.906
0.195622	0.239837	326.401
0.220173	0.260649	328.967
0.221432	0.213948	329.346
0.221491	0.159265	328.202
0.183002	0.248124	329.035
0.182805	0.217384	327.473
0.175555	0.118641	327.657
0.161548	0.143595	327.248
0.110413	0.195853	328.787
0.112697	0.139674	327.535
0.103171	0.0565739	321.62
0.0141018	0.038862	321.62
0.0113914	0.0739833	321.62
-0.00338797	0.0717847	321.62
-0.0106964	0.0710518	321.62
-0.029293	-0.112279	321.62
-0.0312164	-0.176572	321.62
-0.0352306	-0.113956	321.62
-0.048385	-0.110244	321.62
-0.0588017	-0.122401	321.62
0.104554	-0.0555268	329.564
-0.0020444	0.0278349	330.207
0.0830222	0.27642	324.807
0.0848707	0.165021	323.734
0.0557412	0.325181	324.924
0.0618882	0.186796	325.226
0.0770077	0.210203	328.921
0.0683253	0.25269	328.64
0.0639287	0.286315	326.702
0.00529945	0.150275	327.251
0.0919311	0.219968	330.09
-0.0872544	-0.103314	321.62
-0.10722	-0.0437704	321.62
-0.199969	-0.214207	321.62
-0.0922721	-0.116063	324.864
-0.124235	-0.137749	328.275
-0.138122	-0.0499213	327.441
-0.145543	-0.202812	327.81
-0.169967	-0.153862	326.52
0.299815	0.0927402	401.62
0.364701	-0.0145987	407.755
0.310039	0.269747	409.164
0.310712	0.12988	407.625
0.204367	-0.225189	401.62
0.203666	-0.25628	401.62
0.1821	-0.23727	401.62
0.247792	-0.225885	405.039
0.208479	-0.308884	404.196
0.202859	-0.286727	405.025
0.23787	-0.329371	407.772
0.217457	0.0793413	401.62
0.141031	0.00963525	401.62
0.135503	0.0528359	401.62
0.133186	-0.0206057	401.62
0.134465	-0.115473	401.62
0.290956	0.0502027	405.99
0.165658	-0.0421841	403.6
0.255942	0.196589	401.62
0.207505	0.171785	401.62
0.192397	0.149549	401.62
0.176669	0.175896	401.62
0.166182	0.191515	401.62
0.161797	0.172936	401.62
0.159998	0.197685	401.62
0.150029	0.204942	401.62
0.118956	0.244658	401.62
0.25875	0.259543	403.246
0.257951	0.15242	404.05
0.253762	0.165378	404.619
0.192729	0.178754	405.518
0.194332	0.128393	405.423
0.272966	0.184099	408.659
0.243019	0.301347	407.938
0.220988	0.233333	408.394
0.216412	0.201516	406.799
0.119897	0.0967323	401.62
0.119407	0.0217949	401.62
0.101216	-0.0328147	401.62
0.0959178	-0.0431709	401.62
0.0865514	-0.0300356	401.62
0.0807241	0.0245568	401.62
0.0683454	0.0388663	401.62
0.0555147	0.039197	401.62
0.0437416	0.00536756	401.62
0.0118286	0.00410846	401.62
-0.00522882	0.0197329	401.62
-0.0211815	0.00964082	401.62
0.106644	0.0145672	403.916
0.066396	-0.117419	403.287
0.0159269	-0.0378541	404.469
0.0164165	-0.133419	408.108
0.110991	0.250238	401.62
0.101042	0.251033	401.62
0.0918573	0.170088	401.62
0.0785113	0.160479	401.62
0.076598	0.196387	401.62
-0.0129118	0.0965151	401.62
0.114809	0.261012	407.813
-0.126643	-0.149617	401.62
-0.132151	-0.0732208	401.62
-0.0754135	0.188493	406.258
-0.222675	-0.324925	401.62
0.315454	-0.14737	488.422
0.344882	0.0393756	491.283
0.335769	-0.0639854	489.995
0.302425	-0.0670915	481.62
0.246748	0.0624822	481.62
0.236318	0.0596869	481.62
0.166212	0.0467852	481.62
0.229912	0.0473178	484.46
0.178236	0.0687853	485.424
0.272573	0.106495	481.62
0.254257	0.178641	481.62
0.254641	0.125798	481.62
0.228977	0.0994122	481.62
0.215385	0.163887	481.62
0.209122	0.12405	481.62
0.206195	0.100176	481.62
0.18923	0.135287	481.62
0.172712	0.0833969	481.62
0.155713	0.224818	481.62
0.288693	0.143835	484.142
0.248103	0.176314	484.277
0.194322	0.193919	485.349
0.252426	0.217051	488.985
0.21805	0.0864583	488.137
0.180728	0.15416	489.22
0.140542	0.107941	488.878
0.272917	0.153497	490.658
0.239498	0.100052	490.17
0.222964	0.198134	490.408
0.193281	0.164197	491.693
0.147895	0.203157	491.672
0.0852345	0.0164989	481.62
0.0355155	-0.0876799	481.62
0.0335038	-0.003102	481.62
0.0232774	-0.00984368	481.62
0.01304	-0.061421	484.458
0.0365009	-0.0573902	488.129
-0.002272	-0.00374589	488.746
0.0888746	0.148513	484.387
0.108615	0.197141	490.175
-0.145073	-0.248933	485.359
-0.0999045	-0.107112	481.62
-0.120145	-0.0688878	481.62
-0.128977	-0.0821136	481.62
-0.111556	-0.197639	485.59
-0.125489	-0.00646612	485.034
-0.113346	-0.164433	487.421
-0.116002	-0.0897948	489.077
-0.120708	-0.209074	488.105
-0.0823091	0.273193	481.62
-0.310069	0.153244	481.62
-0.31503	0.228825	481.62
-0.340316	0.149367	481.62
0.483607	0.0783729	571.254
0.230745	-0.0158908	569.544
0.190846	-0.0363498	567.935
0.174312	-0.0482229	569.358
0.163893	0.0555472	567.746
0.296719	0.0744115	571.687
0.197398	0.0797431	570.978
0.181536	0.0523062	570.381
0.32852	0.228176	567.528
0.295445	0.192428	569.652
0.242519	0.165073	568.496
0.18351	0.140449	568.497
0.299813	0.219543	569.883
0.244026	0.174485	570.204
0.215267	0.245938	571.429
0.200835	0.347212	572.223
0.178188	0.0906437	572.245
0.134877	0.0494891	569.526
-0.0146118	-0.0896799	569.141
0.116397	0.0422212	571.448
0.145667	0.202906	568.013
0.0752787	0.206285	568.673
0.0950574	0.135462	570.317
0.0218135	0.144765	571.237
0.00822342	0.132157	571.322
-0.155481	-0.223252	569.958
-0.171899	-0.0454015	567.265
0.408557	0.281936	575.443
0.27546	-0.112872	573.67
0.267665	0.018662	574.677
0.281021	0.118168	574.867
0.23841	0.24763	573.442
0.209192	0.256263	575.429
0.193696	0.204655	574.006
0.169538	0.196157	573.503
0.263864	0.209865	578.62
0.24775	0.193108	578.056
0.124704	-0.0216364	574.272
0.0502571	-0.0124082	574.111
0.0477856	0.186789	574.375
-0.0905523	0.00664902	577.284
-0.116535	-0.120817	577.612
-0.243518	0.0279925	577.968
-0.0844803	0.264885	575.174
-0.102927	0.245653	574.565
0.184931	0.0406761	649.461
0.299711	0.0421606	651.711
0.290904	-0.00952381	651.35
0.198498	0.0482759	652.542
0.292423	0.0775403	648.612
0.259966	0.0970355	648.866
0.247067	0.173102	648.861
0.227157	0.213357	649.067
0.220839	0.17422	649.516
0.213542	0.155279	648.451
0.235657	0.192712	649.831
0.231029	0.12042	651.485
0.226173	0.283294	651.844
0.221824	0.22816	652.057
0.216797	0.0818182	651.381
0.205061	0.173257	650.639
0.194199	0.188475	651.918
0.178253	0.146184	651.89
0.0981637	-0.0305375	651.473
0.073453	0.0323082	652.566
0.0535137	0.0446019	652.396
0.156129	0.241171	651.757
0.110184	0.221879	650.53
0.104224	0.189466	651.129
-0.0586094	-0.0429548	648.421
-0.0717143	-0.0513911	648.764
-0.0889389	-0.161716	648.341
-0.110453	-0.196799	651.648
-0.14962	-0.0688161	650.299
0.277692	-0.0695569	654.371
0.162423	0.045294	654.547
0.297468	0.151759	654.225
0.254127	0.226888	654.776
0.182466	0.171162	655.575
0.168451	0.199803	655.288
-0.0160037	0.0295315	656.859
0.0958883	0.190349	655.45
0.0626682	0.220781	654.336
0.0240119	0.135726	655.26
-0.121879	-0.123434	654.367
-0.159613	-0.196763	655.814
0.37154	-0.103972	730.699
0.368952	-0.0787397	731.892
0.327282	-0.0603554	729.267
0.308052	-0.0594189	728.819
0.298474	0.00481572	729.076
0.18236	0.0329389	729.659
0.32929	0.0170287	731.492
0.316834	-0.0619526	729.883
0.31569	-0.134768	729.958
0.250318	-0.0990519	732.953
0.196868	0.0967631	729.476
0.237789	0.186006	731.446
0.236408	0.131424	730.059
0.224686	0.200915	731.377
0.192869	0.115152	731.433
0.148184	0.0289733	729.038
0.0995512	-0.0302819	731.138
0.0939824	-0.0606227	731.901
0.0800397	-0.0545254	732.412
0.0528926	-0.0583179	730.511
0.0475803	-0.0515943	731.09
0.0402041	-0.0499117	731.303
0.0313557	-0.0229302	731.964
0.0282784	-0.045821	732.759
0.0147655	0.0487048	729.955
0.0683232	0.13543	729.178
0.138408	0.0962262	730.239
0.127674	0.200221	731.408
0.101083	0.096755	730.41
0.0950415	0.155276	730.011
0.0810208	0.0856445	732.004
-0.234148	0.244077	728.982
-0.192652	0.319548	730.903
-0.214113	0.131431	730.425
0.313585	-0.00653034	733.35
0.303499	0.0307686	735.27
0.208108	-0.14016	733.636
0.284834	0.243432	734.148
0.270367	0.2565	733.326
0.158334	0.0800355	733.898
0.0344062	0.0166853	734.505
0.0811938	0.13005	734.182
-0.277097	-0.00915169	734.814
