# Supplementary material for: Spinal premotor interneurons controlling antagonistic muscles are spatially intermingled
Source: eLife. 2022 Dec 13;11:e81976. doi: 10.7554/eLife.81976 (PMC9844990; doi:10.7554/eLife.81976)
Supplement: Figure 3—figure supplement 1—source data 12. [file elife-81976-fig3-figsupp1-data12.xlsx]

## Sheet: Sheet1
0.168259	0.110386	998
-0.161835	-0.158704	996
0.225083	-0.122093	994
0.238759	0.0458486	992
0.226171	0.0538331	982
0.306191	-0.205282	976
-0.083892	-0.0476836	1218
-0.192438	-0.11218	1204
0.191501	0.0295787	1208
0.169658	0.0794642	1206
0.30165	0.0848288	1232
0.316002	0.0977727	1234
0.290103	0.0961945	1222
0.136898	0.0453608	1222
0.317877	0.0810424	1228
0.230991	-0.255893	1234
0.226444	-0.268054	1234
0.2885	-0.199014	1222
0.337241	-0.103016	1216
0.323593	-0.113211	1204
0.31482	-0.0836197	1202
0.319694	-0.139182	1206
0.282657	-0.0688303	1196
0.239122	-0.0410466	1474
-0.184402	-0.127283	990
-0.184094	-0.0218174	988
-0.265098	0.100584	990
-0.0878805	-0.0482682	984
-0.211713	-0.111767	976
-0.136298	-0.152327	972
-0.156777	-0.0563829	970
-0.0999821	-0.00629447	968
-0.161436	-0.133279	968
-0.144054	-0.153384	962
0.283241	0.0748145	992
0.246366	0.316277	994
0.0759358	0.153053	992
0.148131	0.0923932	984
0.107906	0.191736	978
0.135755	0.151882	976
0.19815	0.172395	978
0.220326	0.225144	972
0.117706	0.151589	970
0.164891	0.172102	970
0.0916605	0.256495	978
0.0749054	0.118475	966
0.195574	0.157744	964
0.225226	0.135474	964
0.259778	0.0718804	964
0.102748	0.1595	960
0.321904	-0.0977011	984
0.289973	-0.0715049	988
0.256653	-0.177225	978
0.224996	0.0556765	972
0.19806	0.0402108	976
0.309965	-0.0238541	968
0.278868	0.0458879	964
0.154464	0.0200099	962
-0.247221	-0.0888135	1216
-0.169147	-0.0111161	1212
-0.188445	-0.160465	1202
0.0551421	0.233113	1216
0.148995	0.187592	1216
0.225844	0.210853	1210
0.170372	0.15618	1210
0.161409	0.0574962	1214
0.351941	-0.107349	1210
0.258539	-0.0511664	1202
0.372066	-0.026118	1204
0.258922	-0.111682	1230
-0.289001	0.197516	1470
-0.144317	0.276119	1464
-0.252214	-0.159223	1470
-0.100265	-0.0699953	1458
-0.215285	-0.0138502	1460
-0.215981	-0.0239658	1460
-0.231208	-0.160585	1456
-0.279634	-0.00328282	1452
-0.259984	-0.0163059	1446
-0.0585143	-0.100444	1476
0.212952	0.216093	1472
0.19584	0.094661	1472
0.176153	0.171037	1462
0.237192	0.102874	1462
0.147098	0.171807	1456
0.148684	0.0920652	1456
0.107972	0.193101	1450
-0.285203	-0.19175	1692
0.220422	0.155513	1712
0.296543	0.0587789	1716
0.34643	-0.0820114	1702
-0.134494	-0.0976838	1954
-0.214151	-0.251717	1930
-0.148872	-0.0790017	1924
0.117584	0.270069	1940
0.396877	-0.0213589	1952
0.39032	-0.037784	1934
0.318374	-0.146546	1924
0.379234	-0.0856695	1918
-0.0705057	-0.30453	1990.27
-0.399878	-0.0225879	1987.49
0.205393	-0.101868	1993.05
0.349031	-0.145854	1993.05
0.395398	-0.0629996	1995.83
0.39649	0.0165681	1995.83
0.232213	0.0634605	1990.27
0.167045	0.308718	1990.27
0.0573637	0.305859	1990.27
0.02763	0.180234	1990.27
-0.272996	-0.337892	1910.27
-0.229619	-0.347542	1910.27
-0.267702	-0.267343	1910.27
-0.129231	-0.110917	1910.27
-0.0858831	-0.104165	1910.27
-0.0894498	0.0531057	1910.27
0.237536	0.195637	1910.27
0.261478	0.0888139	1907.49
0.334578	0.0318619	1910.27
0.31481	-0.3317	1910.27
-0.181551	-0.218216	1833.05
-0.0816029	-0.259966	1830.27
-0.141793	-0.122024	1830.27
-0.214431	-0.142225	1830.27
-0.318989	-0.188974	1830.27
-0.325945	-0.0158601	1833.05
-0.295831	0.21576	1830.27
-0.185297	0.235494	1830.27
0.173682	0.127126	1833.05
0.056876	0.109698	1830.27
0.204577	0.23205	1830.27
0.191047	0.0838517	1830.27
0.18816	0.0173985	1830.27
0.2459	-0.11562	1833.05
0.204479	-0.281927	1833.05
-0.122421	-0.19691	1750.27
-0.148539	-0.247156	1747.49
-0.22529	-0.0292595	1750.27
-0.178646	0.189385	1747.49
0.0187153	0.132057	1747.49
0.127447	0.147168	1747.49
0.213611	0.12197	1747.49
0.211472	0.181238	1753.05
0.291248	-0.0536471	1747.49
0.35449	0.00132692	1750.27
0.366244	0.0391777	1747.49
0.396408	-0.142375	1750.27
0.379395	-0.259942	1747.49
0.299748	-0.355929	1747.49
-0.182819	-0.0956753	1670.27
-0.312797	0.297706	1670.27
0.168072	0.298522	1670.27
0.227663	0.221977	1670.27
0.284732	0.226896	1670.27
0.141417	0.146514	1670.27
0.149721	-0.0313416	1670.27
0.318597	-0.0313527	1670.27
0.321355	-0.122162	1670.27
0.296801	-0.195484	1670.27
-0.283483	-0.0522185	1593.05
-0.163098	-0.228547	1593.05
-0.23945	-0.335506	1593.05
0.179059	-0.236316	1593.05
0.2811	-0.12781	1593.05
0.306703	-0.240077	1593.05
0.366858	-0.203738	1595.83
0.286242	0.0634116	1593.05
0.323731	0.0844514	1593.05
0.261714	0.170412	1593.05
0.184053	0.144044	1593.05
0.150934	0.118989	1593.05
0.204521	0.102749	1593.05
0.0413822	0.114919	1593.05
0.251052	0.203238	1593.05
0.254961	0.207714	1513.05
0.282651	0.230099	1510.27
0.358374	0.129135	1513.05
0.378115	0.0677601	1513.05
0.320572	0.0621626	1513.05
0.347317	-0.247192	1513.05
0.122949	0.163577	1510.27
-0.0443729	0.131669	1510.27
0.13358	0.0540665	1510.27
-0.0697732	-0.145145	1513.05
-0.208393	-0.321553	1513.05
-0.248615	-0.276961	1513.05
-0.220907	-0.138411	1430.27
-0.0803983	-0.274052	1433.05
0.0522433	0.049656	1430.27
0.235409	0.0364927	1433.05
0.308837	-0.0132448	1430.27
0.336221	-0.0064708	1430.27
0.370048	-0.128215	1430.27
0.290209	-0.140628	1430.27
0.189165	0.143142	1430.27
0.19979	0.18136	1433.05
0.207939	0.237914	1430.27
0.248076	0.202862	1430.27
0.28435	0.240973	1430.27
0.310148	0.215583	1430.27
-0.0917845	-0.214732	1350.27
-0.0981727	-0.261729	1353.05
-0.0349872	-0.242689	1350.27
-0.196049	-0.348099	1350.27
-0.257461	-0.0778532	1350.27
0.228867	0.00361437	1350.27
0.204849	0.040196	1347.49
0.176224	0.0977871	1350.27
0.171895	0.162974	1350.27
0.240441	0.229931	1353.05
0.279471	0.258572	1350.27
0.334234	-0.278419	1353.05
-0.195625	-0.143855	1278.61
-0.18565	-0.00622047	1273.05
-0.215341	-0.0610107	1267.49
-0.136289	-0.139742	1273.05
-0.0947362	-0.212127	1264.71
-0.0765018	-0.174961	1264.71
-0.0943779	-0.107125	1267.49
-0.0084976	-0.0438981	1273.05
-0.064691	0.0246338	1273.05
-0.281382	0.168676	1273.05
0.0243059	0.142976	1270.27
0.234214	-0.0597973	1267.49
0.0971774	0.0576838	1273.05
0.134194	0.0977409	1270.27
0.0664044	0.140757	1270.27
0.113173	0.223952	1264.71
0.180635	0.168627	1264.71
0.190375	0.172947	1267.49
0.1832	0.138811	1267.49
0.187644	0.091736	1267.49
0.282748	0.0733822	1273.05
0.353045	0.0131717	1267.49
0.318903	-0.218798	1270.27
0.270038	-0.278918	1264.71
0.23826	-0.353813	1273.05
0.201408	0.178632	1193.05
0.225555	0.262703	1190.27
0.317616	0.0889732	1184.71
0.337579	0.0423721	1193.05
0.3762	-0.315325	1190.27
0.235306	-0.360534	1190.27
-0.164583	-0.193971	1195.83
0.126134	0.134557	1193.05
-0.0495522	0.00445387	1104.71
0.0360046	0.00941409	1107.49
-0.0832817	-0.225177	1113.05
-0.138172	-0.236492	1115.83
-0.183766	-0.116837	1107.49
-0.251905	-0.270848	1115.83
0.0569893	0.152632	1115.83
0.0860175	0.0976737	1104.71
0.15079	0.0915206	1104.71
0.18638	0.09346	1110.27
0.201607	0.106965	1113.05
0.211674	0.109829	1104.71
0.230753	0.0262092	1113.05
0.258637	0.0147313	1104.71
0.271735	-0.0154824	1107.49
0.22502	-0.109907	1107.49
0.292555	-0.370973	1115.83
0.309276	-0.315194	1110.27
0.232317	0.155571	1113.05
0.26002	0.197931	1110.27
-0.154535	-0.0149446	1038.61
-0.00596571	-0.0509903	1035.83
-0.0871216	0.121225	1035.83
-0.0812285	-0.228043	1035.83
-0.0860563	-0.309681	1033.05
0.119447	-0.198314	1038.61
0.277031	-0.187415	1035.83
0.296293	-0.299193	1038.61
0.202343	-0.299977	1033.05
0.393265	0.100925	1035.83
0.24565	0.0896998	1033.05
0.297599	0.059943	1035.83
0.303543	0.127204	1030.27
0.338856	0.173995	1035.83
0.25348	0.198908	1038.61
0.236167	0.234224	1038.61
0.231712	0.16619	1035.83
0.203343	0.0955506	1035.83
0.0732498	0.147803	1033.05
0.171913	0.30096	1033.05
0.30172	0.280551	1038.61
0.299461	-0.00843011	1033.05
0.281141	0.0136708	1033.05
-0.0982541	-0.268214	958.61
-0.08096	-0.202211	955.83
-0.0727336	-0.182701	958.61
-0.198504	0.112649	958.61
-0.167552	0.0309295	958.61
-0.274411	-0.244017	955.83
0.141635	0.0297279	955.83
0.156949	0.0711787	958.61
0.147665	0.111794	953.05
0.20492	0.114165	953.05
0.209291	0.14733	958.61
0.251576	0.152499	958.61
0.250758	0.1365	955.83
0.308949	0.0775173	958.61
0.12512	0.103716	953.05
0.0877709	0.209048	958.61
0.166544	0.177662	953.05
0.171662	0.225428	953.05
0.188076	0.233646	953.05
0.197414	0.200396	958.61
0.22168	0.257546	958.61
0.0739306	-0.00922868	958.61
0.204139	-0.382332	958.61
0.335197	-0.211217	958.61
0.363225	-0.190272	955.83
0.422336	-0.0944036	955.83
0.35958	-0.238943	958.61
0.12732	-0.216552	955.83
-0.135742	-0.294383	875.83
-0.146688	-0.238253	870.27
-0.180661	-0.160229	875.83
-0.0843283	-0.242284	873.05
-0.071403	-0.196509	878.61
-0.0304725	0.0342054	870.27
-0.00512357	0.0435969	870.27
0.052772	0.0732468	878.61
0.0651745	0.036612	878.61
0.0937168	0.0607399	870.27
0.181347	0.0931196	878.61
0.170795	0.109238	875.83
0.188977	0.123833	873.05
0.207361	0.116051	875.83
0.187731	0.155562	878.61
0.180056	0.192715	878.61
0.277277	0.148871	873.05
0.242342	0.135416	873.05
0.285672	0.0985341	875.83
0.279407	0.245089	875.83
0.266191	0.249465	878.61
0.239736	0.230457	875.83
0.240631	0.000330724	875.83
0.269387	-0.0466813	875.83
0.267132	-0.298665	878.61
0.409005	-0.315064	875.83
0.457821	0.00303669	875.83
0.192617	0.106581	873.05
0.224597	0.196049	815.29
0.199191	0.203166	815.29
0.198141	0.179335	812.51
0.125497	0.174368	812.51
0.201449	0.12615	812.51
0.220927	0.0418784	812.51
0.311504	-0.0151164	818.07
0.297984	-0.136299	815.29
0.281523	-0.166012	812.51
0.235991	-0.225328	815.29
0.256372	-0.259366	812.51
0.1891	0.00439525	815.29
0.0780295	0.0459938	812.51
0.0427241	0.00937372	812.51
-0.133328	-0.179016	812.51
-0.131036	-0.0990408	812.51
-0.167505	-0.178824	812.51
-0.0995068	-0.178526	812.51
0.19795	0.117233	892.51
0.25396	0.140913	889.73
0.260426	0.0901986	892.51
0.269478	0.0689363	895.29
0.249732	0.0736042	892.51
0.251961	0.0549668	892.51
0.26681	0.00565238	892.51
0.317914	-0.0346155	892.51
0.335689	0.0227811	892.51
0.253722	-0.0960426	892.51
0.255908	-0.150563	892.51
0.226936	0.0391937	895.29
0.168035	0.0430849	892.51
0.131005	0.0934467	892.51
0.105954	0.150171	889.73
0.261063	-0.338359	892.51
-0.142358	-0.297451	895.29
0.229572	0.0617504	972.51
0.206762	-0.0530329	972.51
0.280656	-0.0384959	975.29
0.295528	-0.109657	972.51
-0.138612	-0.24329	972.51
0.124878	0.0673252	972.51
0.0705262	0.118888	969.73
0.0831389	0.243791	969.73
0.264704	0.15429	972.51
0.204903	0.17207	969.73
0.203603	0.140861	972.51
0.197687	0.121945	972.51
0.195322	0.0937161	972.51
0.160987	0.0979201	972.51
0.193559	0.00803907	969.73
0.0608007	0.058473	972.51
0.303638	-0.149617	975.29
0.274006	0.281785	1052.51
0.198672	0.271238	1052.51
0.209273	0.176385	1052.51
0.220233	0.171988	1052.51
0.230315	0.175398	1055.29
0.229204	0.0953997	1052.51
0.259966	0.0650215	1052.51
0.159863	0.0566288	1052.51
0.0935756	0.180532	1049.73
0.0656693	0.185547	1049.73
0.0928962	0.0844972	1052.51
0.248822	0.0401915	1052.51
0.276144	0.0121498	1055.29
0.247794	-0.042335	1055.29
0.203695	-0.0646696	1055.29
0.222	-0.0692289	1055.29
0.330624	-0.0222485	1055.29
0.372871	-0.094888	1055.29
0.198187	-0.143112	1055.29
0.0483269	0.0329043	1052.51
0.0284796	0.0117144	1052.51
0.281888	0.130029	1135.29
0.283409	0.0764254	1135.29
0.262795	0.124423	1135.29
0.307577	0.180039	1132.51
0.226808	0.159006	1132.51
0.199322	0.130891	1132.51
0.181799	0.153672	1132.51
0.198994	0.194145	1132.51
0.210049	0.22515	1135.29
0.145611	0.107917	1135.29
0.106365	0.0720579	1132.51
0.0642945	0.051118	1132.51
0.268454	-0.124726	1132.51
-0.070669	-0.014675	1132.51
0.306847	0.107251	1209.73
0.252875	0.171484	1212.51
0.202075	0.133008	1212.51
0.178308	0.171126	1212.51
0.22447	0.072864	1212.51
0.262382	0.0419687	1209.73
0.293522	0.033719	1212.51
0.365886	-0.0711004	1209.73
0.281316	-0.322487	1209.73
0.251652	-0.300578	1209.73
0.155826	0.0291531	1212.51
0.121671	0.0289459	1215.29
0.335273	-0.167109	1209.73
0.420309	-0.0517966	1286.95
0.409551	-0.135791	1289.73
0.279284	0.0570737	1289.73
0.202533	-0.0535216	1289.73
0.136584	0.0388447	1292.51
0.183242	0.149195	1289.73
0.222125	0.171958	1289.73
0.220075	0.213835	1289.73
0.205846	0.232207	1292.51
0.0647938	0.0213704	1292.51
-0.228533	0.17982	810.248
-0.288164	-0.12794	810.454
0.0867852	0.105914	801.39
0.116288	0.0973008	801.39
0.116231	0.0314082	801.39
0.151301	0.0144495	801.39
0.0831179	0.0726726	806.469
0.175182	0.124209	808.269
0.181957	-0.10315	808.706
0.208536	0.131654	806.283
0.222322	0.190409	807.789
0.248548	0.141318	806.221
0.199999	0.093401	801.39
0.25087	0.0131164	801.39
0.195511	0.0585266	804.275
0.217266	-0.0828722	807.398
0.228788	0.110492	805.967
0.252254	0.0846887	805.756
0.242761	-0.137642	807.951
-0.129	-0.146845	881.39
-0.0894931	-0.164582	887.336
0.17514	0.15783	881.39
0.207088	0.129337	881.39
0.229712	0.187077	881.39
0.218417	0.264259	886.806
0.223978	0.154804	887.536
0.118008	0.103712	881.39
0.113823	-0.0293988	881.39
0.2015	0.0718906	881.39
0.213594	0.0540615	881.39
0.214037	-0.00563471	881.39
0.170995	0.0373251	885.881
0.153692	0.0994325	889.093
0.192221	-0.231685	881.39
0.228455	0.108763	881.39
0.232946	0.142253	881.39
0.247511	-0.0259753	881.39
0.257147	-0.0941587	881.39
0.234783	0.0531662	887.346
0.284454	0.0376214	889.711
0.267398	-0.334006	884.068
0.323512	-0.385125	882.891
-0.0310566	-0.0214155	893.026
-0.128753	-0.224041	969.335
0.0834455	0.158973	961.39
0.0597439	0.0236764	961.39
0.105782	0.0230929	964.871
0.110856	-0.259947	963.717
0.167237	0.117236	965.855
0.187274	0.242735	967.978
0.175972	0.17846	970.852
0.276982	0.123675	969.57
0.173955	0.094656	961.39
0.242527	0.0943277	961.39
0.160094	0.0499289	964.477
0.192991	0.0952775	963.15
0.202988	0.0751924	967.279
0.28681	0.0848822	967.651
0.137098	0.0666891	968.989
0.199229	-0.201097	961.39
0.210698	-0.25373	963.65
-0.247108	-0.295034	971.476
0.158323	0.141537	973.068
0.247498	0.174389	972.404
0.0509665	0.157195	1041.39
0.0685626	0.136677	1041.39
0.0792822	0.17794	1041.39
0.110073	0.198944	1043.25
0.0868153	0.115545	1041.39
0.0947329	0.0113375	1041.39
0.121697	0.0166273	1047.84
-0.00617465	0.047029	1049.37
0.195205	0.156996	1048.16
0.25417	0.125401	1047.01
0.182301	0.170599	1049.32
0.230929	0.149798	1049.97
0.179008	0.0874802	1041.39
0.186617	0.0550462	1041.39
0.211069	0.115709	1041.39
0.242098	0.0711364	1041.39
0.247498	0.00896307	1041.39
0.272301	0.0469866	1041.39
0.330665	0.0379616	1041.39
0.231232	-0.0261617	1043.13
0.257243	0.110607	1046.77
0.172119	-0.0427941	1049.9
0.201661	0.0938961	1049.55
0.26025	-0.177799	1041.39
0.350448	-0.340325	1041.39
0.370398	-0.343427	1041.39
-0.192302	-0.106874	1127.7
0.0940565	0.108591	1121.39
0.100216	0.168348	1121.39
0.120406	0.141671	1128.58
0.193026	0.186478	1129.06
0.0167323	-0.0725751	1121.39
0.0383677	-0.0330828	1121.39
0.0660867	-0.0442034	1121.39
0.0928301	0.000346768	1121.39
0.132462	0.0560108	1121.39
0.161416	-0.00223372	1121.39
0.043375	-0.00402987	1125.52
0.0657992	-0.0175475	1127.64
0.163679	-0.0378589	1127.81
0.198535	0.114764	1121.39
0.219955	0.11086	1121.39
0.237296	0.142519	1121.39
0.21582	0.139702	1126.79
0.215736	-0.105981	1121.39
0.291093	-0.0176575	1121.39
0.356385	-0.143864	1121.39
0.228679	-0.257744	1121.39
0.255648	-0.263114	1121.39
-0.189454	-0.161896	1201.39
0.0780524	0.183988	1203.06
0.167503	0.179612	1204.84
0.162647	0.204848	1209.9
0.0929109	0.00378909	1201.39
0.284445	-0.0530008	1201.39
0.192121	0.134551	1204.64
0.319335	-0.0294597	1204.34
0.213414	-0.0847594	1208.28
0.296249	-0.0461232	1207.08
0.207365	0.0946037	1210.33
0.251513	0.139881	1209.9
0.263369	0.132446	1210.41
0.251838	-0.245224	1209.91
0.201962	-0.0464302	1212.52
0.194598	0.0711599	1215.34
0.260873	0.0902363	1218.07
0.265637	-0.0404553	1218.07
0.361162	-0.201567	1218.07
-0.0746021	-0.0552323	1281.39
0.0900683	0.117891	1281.39
0.104765	0.198868	1281.39
0.180416	0.130722	1287.31
0.189561	0.201108	1286.22
0.192625	0.116512	1288.11
0.208765	0.237665	1289.65
0.01315	-0.0602824	1281.39
0.129558	0.0973176	1285.3
0.102149	0.0875168	1290.36
0.237824	0.0127433	1283.74
0.206643	0.0864187	1286.37
0.231684	0.0529189	1288.29
0.217948	-0.118155	1290.42
0.380856	-0.156656	1288.11
0.136445	-0.0675271	1293.07
0.212932	0.165407	1291.7
0.221881	0.155617	1291.38
-0.0730713	-0.121193	1369.98
0.105813	0.140998	1361.39
0.162393	0.153841	1361.39
0.196909	0.140603	1364.47
0.210468	0.131742	1368.09
0.198707	0.104651	1365.54
0.237122	0.0529614	1369.07
0.165819	0.238948	1376.33
0.198733	0.163165	1378.07
0.119472	0.0843177	1373.35
0.195052	-0.043963	1371.72
0.197595	0.0420346	1378.07
0.212512	0.109323	1378.07
0.242775	0.00477078	1373.27
0.273721	0.0475476	1371.99
-0.0521007	-0.0546134	1450.27
0.0836359	0.167318	1443.74
0.135001	0.122824	1446.02
0.182802	0.156515	1450.31
0.121389	0.085291	1442.87
0.0448753	0.0106996	1446.05
0.238291	0.138705	1447.32
0.19188	0.171624	1449.98
0.234628	0.15831	1449.03
0.33302	-0.0851262	1449.76
-0.197592	-0.203003	1452.3
0.198431	0.204147	1451.91
0.291383	-0.0353873	1451.88
0.228852	0.0900384	1455.63
0.259974	-0.198938	1454.92
-0.196264	-0.302585	1526.21
0.140595	0.141365	1526.65
0.0983246	0.208266	1530.39
0.152732	0.13812	1529.39
0.0814019	-0.0142809	1521.39
0.12654	-0.0466469	1527.27
0.13895	0.00706408	1526.84
0.0381474	0.0406952	1531.01
0.115237	0.0602668	1530.19
0.21477	0.157758	1529.85
0.204523	0.118096	1523.7
0.247505	0.0123287	1526.66
0.0672535	-0.00912035	1532.87
0.108931	-0.00479668	1532.53
0.178286	-0.101287	1533.09
0.166137	0.0702771	1534.64
0.224106	0.246176	1531.16
0.266064	-0.0310531	1531.3
0.330599	-0.00350888	1531.86
-0.133384	-0.100744	1606.23
-0.13156	-0.152747	1605.69
0.0893473	0.226428	1608.42
0.0708355	0.00371525	1601.39
0.0975106	0.0056274	1601.39
0.098178	0.0323219	1601.39
0.12538	-0.0550819	1601.39
0.134552	-0.0265734	1601.39
0.141164	-0.0593029	1601.39
0.157981	-0.0499789	1601.39
0.161734	-0.0158797	1601.39
0.172516	0.0274469	1601.39
0.176973	-0.0389354	1605.44
0.113287	-0.00501995	1605.78
0.0767149	-0.0338186	1609.12
0.186029	0.12289	1610.17
0.177058	-0.0896274	1608.04
0.27037	0.0607663	1601.39
0.316743	-0.0521812	1601.39
0.258838	-0.00322194	1604.65
0.277114	0.0127255	1603.35
0.212485	0.131074	1605.97
0.234007	0.162942	1607.29
0.213299	0.0218878	1611.06
0.256165	-0.289826	1606.83
0.409037	-0.1982	1609.62
0.241296	0.142157	1612.1
-0.187721	-0.223594	1681.39
0.0153095	-0.0241469	1684.66
0.0313942	-0.0416142	1681.39
0.102877	0.138834	1681.39
0.124435	0.151764	1681.39
0.195988	0.102799	1681.39
0.128976	0.136647	1686.21
0.173553	0.135903	1690.36
0.29751	0.0338728	1689.15
0.346803	-0.102566	1683.77
0.159482	0.000102967	1693.09
0.207394	-0.0176303	1695.15
0.231428	0.136536	1691.47
-0.193181	-0.147976	1761.39
-0.160652	-0.13396	1761.39
0.148462	0.162573	1761.39
0.165049	0.165248	1761.39
0.172578	0.0519711	1761.39
0.173092	0.131647	1761.39
0.177681	0.081171	1761.39
0.213507	0.0197733	1761.39
0.313425	-0.0293807	1761.39
0.327118	-0.262511	1761.39
0.397304	-0.192756	1761.39
0.398024	-0.148025	1761.39
-0.249155	0.130669	1841.39
-0.219535	-0.202862	1841.39
-0.204869	-0.183631	1841.39
-0.109056	-0.147992	1841.39
-0.0723028	-0.222058	1841.39
0.203514	0.253687	1847.96
0.199701	0.177829	1841.39
0.211789	0.125538	1841.39
0.210439	0.179451	1841.39
0.134959	-0.00189443	1843.57
0.227	0.140684	1846.26
0.0696198	-0.145527	1841.39
0.0906098	-0.174157	1841.39
0.21711	-0.13257	1841.39
0.27006	0.0753157	1841.39
0.275045	0.0345633	1841.39
0.298586	0.0208224	1841.39
0.366909	-0.0830425	1843.9
0.385717	-0.161665	1847.52
0.281069	-0.329495	1846.23
-0.0943859	-0.206947	1921.39
0.180099	0.222989	1929.65
0.0522843	0.0307873	1921.39
0.057477	0.02067	1921.39
0.0706413	0.0441497	1921.39
0.0767833	0.158846	1921.39
0.0858817	0.134231	1921.39
0.158571	-0.0398614	1921.39
0.162427	0.0123682	1921.39
0.198711	0.130373	1921.39
0.112307	0.128625	1925.46
0.0875128	-0.130743	1923.04
0.26415	0.015581	1921.39
0.285334	-0.0288324	1921.39
0.284381	0.0445473	1923.14
0.25697	0.0395642	1929.41
0.326401	-0.0515173	1929.48
0.304569	-0.230597	1926.69
0.416286	-0.158683	1923.75
0.0702664	0.101936	804.17
0.113285	0.106945	804.17
0.242488	0.134021	804.17
0.273468	0.0986222	809.73
0.205396	0.0183367	809.73
0.16992	0.00832977	812.51
0.204929	0.0529954	812.51
0.286668	-0.0122319	806.95
0.203398	-0.0892028	804.17
0.26853	-0.337704	812.136
0.321025	-0.37368	809.784
0.179538	0.08157	815.29
0.0927137	0.0173456	815.29
0.241123	0.232615	809.73
0.336063	-0.0930274	889.98
0.343211	-0.340046	892.884
0.189743	-0.0381006	886.95
0.195205	0.0466291	881.39
0.189568	0.130009	889.73
0.0704859	0.0756966	881.39
0.175411	0.0103697	892.51
0.0658784	0.118283	881.39
0.152518	-0.0309841	966.95
0.232224	-0.261946	969.009
0.229916	0.0887377	961.39
0.208989	0.122562	961.39
0.178402	0.032117	969.73
0.110475	0.0191252	966.95
0.111202	0.0845755	964.17
0.108348	0.04414	969.73
-0.0634841	-0.10589	972.396
-0.0759713	-0.0402109	1048.28
0.0548798	0.0308781	1044.17
0.135334	0.0494836	1044.17
0.168039	0.00332344	1046.95
0.18377	0.00555125	1044.17
0.0981527	0.125158	1046.95
0.145188	0.229154	1044.17
0.208592	0.172904	1049.73
0.20874	0.138474	1046.95
0.256536	0.0539007	1049.73
-0.0985651	-0.17512	1132.51
-0.128495	-0.207284	1132.93
0.117915	0.0105834	1124.17
0.148949	-0.0185168	1126.95
0.107461	0.105362	1124.17
-0.101812	-0.134817	1204.17
0.049959	-0.0157186	1212.51
0.193593	-0.241548	1215.29
0.230962	-0.269291	1209.73
0.242007	0.0163989	1212.51
0.172141	0.0963469	1209.73
0.130392	0.110427	1201.39
0.113234	0.105603	1209.73
0.0869847	0.198368	1206.95
0.0653486	0.0978263	1209.73
0.0872311	0.0994635	1204.17
0.361483	-0.299935	1288.21
0.142997	0.116507	1284.17
0.035145	0.188802	1286.95
0.0797503	0.155645	1281.39
0.155784	0.0890962	1284.17
0.146903	0.0752453	1289.73
0.276254	0.0820323	1284.75
0.150729	0.0153525	1286.95
0.32514	0.00997652	1365.45
0.227905	-0.0255154	1366.95
0.206842	-0.244417	1361.39
0.194427	0.12344	1361.39
0.214113	0.114965	1361.39
0.261176	0.0781039	1366.95
0.173487	0.00853502	1361.39
0.15182	0.0234751	1361.39
0.196594	0.0569592	1446.4
0.25008	0.075121	1450.55
0.200245	0.123706	1441.84
0.155131	0.122652	1449.11
0.123802	0.114942	1453.18
0.254131	-0.144932	1451.17
0.215325	-0.2375	1452.08
0.164576	0.113612	1529.73
0.20805	0.140045	1526.95
0.28999	0.000177259	1529.73
0.243852	-0.254535	1526.95
0.407379	-0.24229	1532.51
0.166567	0.0711841	1604.17
0.119051	0.0375003	1601.39
0.105058	0.0610302	1606.95
0.12326	-0.0252547	1604.17
0.17856	-0.0705386	1601.39
0.202985	-0.112642	1604.17
0.164634	0.0886701	1689.73
0.240885	-0.0338083	1690.05
0.0689686	0.167688	1686.95
0.184448	0.279565	1696.59
0.145438	0.247783	1695.29
0.13448	-0.0622778	1772.51
0.138552	0.0667488	1762.04
0.158818	0.135336	1768.36
0.254217	0.148863	1846.3
0.154955	-0.042563	1844.17
-0.139541	-0.220255	1843.24
0.261681	0.0225327	807.296
0.25206	-0.101946	809.195
0.241432	-0.0967629	807.901
0.199306	-0.102582	806.933
0.190621	-0.111046	806.963
0.201092	0.207053	801.62
0.209641	0.195807	804.985
0.187909	0.145933	804.348
0.157141	0.191099	804.97
0.151423	0.252865	805.094
0.271985	0.267682	810.11
0.102044	-0.00172184	801.62
0.12334	-0.0161828	806.072
0.0689779	0.0376817	806.324
0.14862	-0.0342152	806.529
0.130674	-0.023946	807.994
0.0605648	0.0179692	808.633
0.0498584	-0.0791896	807.716
0.0437939	0.00751538	807.976
0.0326877	-0.0644546	808.832
0.0345814	0.0276486	810.583
0.140946	0.123168	804.226
0.114971	0.19588	808.39
0.0858683	0.245422	806.778
0.0818086	0.262166	806.774
0.0812421	0.126533	808.903
-0.287507	-0.0340466	803.51
-0.0956834	-0.0954445	807.212
-0.201746	0.225767	805.337
-0.195529	0.240001	807.338
0.193588	-0.0404095	881.519
0.311157	-0.0293503	884.965
0.302366	-0.0342631	885.325
0.219656	-0.0895692	887.39
0.161318	0.0152902	887.444
0.21502	-0.0152403	890.959
0.281992	0.0674942	881.157
0.21541	0.235524	880.794
0.209769	0.163914	880.983
0.204314	0.173707	880.964
0.196484	0.172451	880.975
0.185644	0.203101	880.907
0.161126	0.176738	881
0.160998	0.257769	880.792
0.153339	0.196613	880.957
0.301229	0.10301	885.161
0.22896	0.149258	883.704
0.174188	0.168396	885.22
0.24142	0.207672	887.131
0.20849	0.219355	887.679
0.194228	0.207134	887.875
0.182259	0.150347	886.344
0.229644	0.201227	892.05
0.126631	0.0546128	881.35
0.119004	0.0561156	883.61
0.0968802	-0.000841378	884.606
0.0852555	0.00592321	883.242
0.0767369	0.000465727	885.64
0.0648307	0.0205844	885.671
0.154074	-0.167777	888.049
0.146885	0.0209019	888.677
0.102098	0.0106365	886.916
0.0728759	0.0393102	887.244
0.0681652	0.000534936	887.854
0.0424697	0.0393635	886.675
0.0330917	0.0415111	890.724
0.0302513	0.0486019	890.939
0.0759301	0.26563	886.495
0.00630002	0.0640178	887.949
-0.0623187	-0.0960966	892.988
-0.111945	0.045598	890.482
-0.122412	-0.0637108	892.367
-0.135848	-0.218804	890.556
-0.127831	0.119022	883.49
-0.143383	0.112893	885.862
-0.102006	0.132307	886.725
-0.108317	0.114404	886.852
-0.114168	0.141076	888.326
-0.13489	0.105359	887.123
-0.167551	0.184346	886.855
0.228181	-0.0779158	893.921
0.0759335	0.0569442	897.596
0.0594166	-0.0722994	897.934
0.226776	-0.25094	961.62
0.329373	-0.0844133	961.62
0.320998	-0.0665751	961.62
0.266177	0.0482297	961.62
0.254449	-0.00785103	961.62
0.193988	-0.125521	966.251
0.341703	0.214042	961.62
0.278983	0.156473	961.62
0.256363	0.149218	961.62
0.237733	0.113739	961.62
0.229815	0.11211	961.62
0.215637	0.13864	961.62
0.184866	0.2951	961.62
0.187008	0.187444	965.783
0.163251	-0.00553504	961.62
0.1457	0.0193599	961.62
0.126086	0.0186993	961.62
0.120927	0.00998335	961.62
0.116552	0.0171579	961.62
0.111014	-0.02711	961.62
0.10353	-0.0718484	961.62
0.0649295	-0.119693	961.62
0.0525791	0.0414061	961.62
0.0529206	-0.119484	961.62
0.0325201	-0.0316815	961.62
0.0744635	-0.155777	965.254
0.0197036	-0.00469024	964.679
0.101154	0.00710759	970.462
0.143812	0.213272	961.62
0.139212	0.165219	961.62
0.11078	0.153987	961.62
0.103432	0.22776	961.62
0.0784758	0.218459	961.62
0.0944514	0.253668	966.197
-0.0243624	-0.141578	961.62
-0.118255	-0.118377	961.62
-0.12425	-0.173309	961.62
-0.102504	-0.0804886	970.815
0.369475	-0.102957	1051.89
0.250825	-0.292639	1046.08
0.320559	-0.0836955	1041.62
0.280699	0.0273246	1041.62
0.247982	-0.00924537	1041.62
0.241227	0.0553478	1041.62
0.243769	-0.0236201	1041.62
0.247535	-0.168277	1041.62
0.222722	0.0256598	1041.62
0.213723	0.0218171	1041.62
0.202792	0.0477323	1041.62
0.202125	-0.0201763	1041.62
0.199274	-0.066752	1041.62
0.187932	-0.0290706	1041.62
0.189447	-0.0797541	1041.62
0.166844	0.0394182	1041.62
0.316715	0.0526808	1046
0.234294	0.070567	1043.61
0.252423	0.123366	1041.62
0.24283	0.107199	1041.62
0.218524	0.182729	1041.62
0.175986	0.260088	1041.62
0.167426	0.138446	1041.62
0.155713	0.138193	1041.62
0.301171	0.121748	1043.71
0.285386	0.181394	1051.97
0.15247	0.0380586	1041.62
0.0655291	0.0485263	1041.62
0.0604481	-0.169569	1041.62
0.0516861	0.0473245	1041.62
0.0542216	-0.0642397	1041.62
0.016991	-0.078869	1041.62
0.0877713	0.105895	1041.62
0.102554	0.20134	1044.94
0.0743226	0.237231	1045.21
0.0716896	0.13883	1044.69
0.0614504	0.231546	1051.12
-0.0845291	-0.130259	1041.62
-0.207877	0.0242969	1041.62
0.169588	-0.00501804	1053.82
-0.251945	0.174775	1054.52
0.298237	-0.284758	1121.62
0.280463	-0.293456	1126.46
0.254676	-0.28351	1125.24
0.240205	-0.287963	1126.23
0.322748	0.0888791	1121.62
0.300837	0.0566558	1121.62
0.271558	0.0414641	1121.62
0.264095	-0.0142536	1121.62
0.192805	0.0506051	1126.31
0.251731	0.0297271	1127.07
0.290118	0.215035	1121.62
0.180019	0.288314	1121.62
0.172872	0.246632	1121.62
0.22825	0.194058	1127.15
0.166188	0.287752	1127.95
0.186697	0.384282	1130.94
0.158554	-0.0556149	1121.62
0.149742	-0.0339051	1121.62
0.0619823	0.0538969	1128.62
0.0848237	0.0386585	1130.25
0.161705	0.221672	1121.62
0.120881	0.128655	1121.62
0.115051	0.120714	1121.62
0.088335	0.228967	1121.62
0.081723	0.222792	1121.62
0.0567107	0.296117	1127.03
0.0806137	0.339722	1130.61
0.115359	0.441082	1121.62
0.137417	0.394017	1125.13
0.146058	0.382553	1131.91
-0.0920342	-0.180824	1121.62
-0.156518	-0.114949	1125.53
-0.0676163	-0.173774	1128.86
-0.102534	-0.0443276	1128.68
-0.197317	-0.253444	1130.23
-0.223591	0.226176	1121.62
0.249615	-0.219666	1201.62
0.273749	0.0645461	1201.62
0.248511	0.0382762	1201.62
0.196653	-0.103306	1201.62
0.186081	-0.0122121	1201.62
0.170054	-0.0246237	1201.62
0.343481	0.128135	1201.62
0.301898	0.0870496	1201.62
0.260311	0.084857	1201.62
0.219928	0.138503	1201.62
0.217285	0.177204	1201.62
0.212242	0.199218	1201.62
0.2107	0.223936	1201.62
0.185646	0.203286	1201.62
0.176341	0.145978	1201.62
0.167018	0.116213	1201.62
0.160738	0.135459	1201.62
0.306111	0.111599	1204.26
0.127306	-0.0167112	1201.62
0.119536	-0.022787	1201.62
0.0500967	0.0223554	1201.62
0.0287979	0.0426883	1201.62
0.0480787	0.0650719	1207.5
0.0224013	-0.0566014	1210.72
0.0726068	0.168653	1201.62
0.090651	0.113671	1205.78
0.0804453	0.329657	1208.61
-0.037034	-0.0996324	1211.4
-0.211999	0.200639	1201.62
-0.193352	0.242439	1209.43
-0.221555	-0.227523	1201.62
0.34422	-0.0306585	1281.62
0.301365	-0.0352027	1281.62
0.253047	0.0445068	1281.62
0.248612	-0.187195	1281.62
0.323677	0.0838049	1285.76
0.315581	0.04922	1283.48
0.218867	0.0934652	1286.43
0.281361	0.13166	1281.62
0.206037	0.152137	1281.62
0.189951	0.176156	1281.62
0.188747	0.153944	1281.62
0.165564	0.163841	1281.62
0.149007	0.15396	1283.91
0.147766	0.118315	1284.26
0.10911	0.138919	1281.62
0.0810274	0.0852292	1281.62
0.0693681	0.201055	1281.62
0.101915	0.0980978	1286.15
0.117284	0.138541	1288.75
-0.142751	-0.131955	1281.62
-0.1265	-0.152631	1285.56
-0.202698	0.0327099	1285.51
0.363606	-0.0871435	1361.62
0.340582	-0.01319	1363.29
0.290241	0.0351758	1365.1
0.250067	0.064251	1366.12
0.225255	0.0609218	1366.04
0.218388	-0.128843	1365.81
0.243039	-0.135984	1366.49
0.322053	0.0975078	1361.62
0.315907	0.12812	1361.62
0.297791	0.141579	1361.62
0.242271	0.176926	1365.97
0.239769	0.204634	1365.17
0.204926	0.0791043	1365.6
0.284302	0.269462	1367.99
0.270297	0.304569	1369.06
0.182697	0.137975	1369.94
0.15031	-0.0132643	1368.83
0.0507525	0.0314512	1369.61
0.0429414	0.029611	1369.41
0.13032	0.190164	1365.95
0.122203	0.134529	1369.12
0.0941659	0.163643	1367.52
0.0946143	0.283127	1370.38
0.0858383	0.182096	1371.9
-0.147848	-0.239715	1369.63
-0.159045	-0.229368	1370.59
-0.171773	-0.165175	1372.22
