# Supplementary material for: Spinal premotor interneurons controlling antagonistic muscles are spatially intermingled
Source: eLife. 2022 Dec 13;11:e81976. doi: 10.7554/eLife.81976 (PMC9844990; doi:10.7554/eLife.81976)
Supplement: Figure 3—figure supplement 2—source data 1. — The x-y coordinates are the raw coordinates before normalization while z coordinates have been shifted so that the axis origin is at the border between L4 and L5. Negative values are in the rostral direction. [file elife-81976-fig3-figsupp2-data1.xlsx]

## Sheet: Sheet1
246.68	-79.87	-4784
314.84	186.39	-4798
328.86	155.55	-4566
295.55	38.88	-4546
365.65	-110.66	-4292
428.63	-132.96	-4320
-219.88	-128.4	-4064
209.84	0.88	-4062
377.73	-2.45	-4052
236.27	99.76	-4056
297.53	152.64	-4058
-227.24	-46.09	-3608
-200.66	94.8	-3604
190.3	156.72	-3330
-269.14	-111.39	-3350
207.49	80	-3350
392.79	-145.26	-3350
373.35	19.2	-3350
388.81	54.52	-3360
306.88	-16.49	-3362
-234.37	-87.19	-3108
-173.41	-88.24	-3118
198.59	229.11	-3094
242.48	61.27	-3108
304.65	115.15	-3122
373.55	-140.15	-3090
-271.7	-128.07	-2616
328.36	151.75	-2630
459.63	96.31	-2642
163.68	-22.66	-2612
509.24	42.71	-2636
341.33	-131.77	-2644
358.54	48.98	-2642
210.22	84.59	-2402
489.67	208.32	-2402
-199.22	-104.05	-5010
-280.1	-158.14	-4532
83	17.27	-4288
272.74	29.79	-4296
57.02	-130.38	-4084
-225.22	-154.45	-3836
-329.93	-211.64	-3682
-251.16	-177.26	-3688
474.25	366.13	-3676
466.25	192.34	-3678
83.51	174.07	-3366
28.71	70.14	-3366
175.83	22	-3098
276.52	-42.06	-2880
-172.31	-7.16	-2880
240	207.93	-2884
428.81	14.27	-2676
501.65	-76.12	-2668
357.75	-325.75	-2688
-214.1	-251.48	-2666
-221.7	-403.13	-2688
397.17	88.61	-2400
241.26	193.01	-5032
254.15	200.4	-5052
317.78	253.37	-4802
209.57	113.8	-4772
219.51	-175.32	-4546
-132.66	-276.49	-4544
-210.95	428.52	-4279
-214.37	-27.22	-4263
-470.16	-382.07	-4239
129.19	-94.2	-4243
51.1	-90.16	-4243
77.43	-112.42	-4241
173.28	81.53	-4265
282.89	142.02	-4253
128.15	335.98	-4271
346.45	-39.93	-4048
-231.4	-93.91	-4046
-104.26	-216.61	-4044
260.15	-28.93	-3808
236.31	58.14	-3836
-331.32	279.9	-3572
-251.74	-243.06	-3568
-170.78	-146.56	-3570
-155.3	-86.49	-3574
-164.69	-247.19	-3582
396.06	42.01	-3572
433.05	12.46	-3572
287.87	192.56	-3574
231.21	23.22	-3574
213.2	-31.26	-3576
385.93	-56.04	-3578
430.73	-28.92	-3600
346.8	115.16	-3602
350.26	-7.72	-3600
262.96	431.32	-3320
121.27	409.26	-3320
406.05	122.2	-3312
306.42	65.73	-3312
448.02	-83.11	-3312
430.06	235.66	-3300
-138.02	-117.08	-3290
162.01	-155.09	-3296
-160.52	10.34	-3312
-279.68	-336.63	-3308
-260.99	132.19	-3306
-127.47	68.46	-3292
-208.65	-14.54	-3284
-202.31	-4.26	-3284
357.43	331.47	-3296
158.47	236.13	-3316
-149	-137.69	-3092
-97.85	-117.85	-3100
-225.47	-21.03	-3108
-362.25	29.94	-3092
30.09	55.56	-3096
255.85	185.09	-3120
240.75	261.07	-3102
374.51	192.84	-3090
396.55	237.17	-3110
429.62	237.01	-3124
493.94	139.54	-3100
440.18	-15.2	-3112
476.07	-85	-3110
483.32	-70.97	-3100
-336.03	219.97	-2862
-118.89	-114.53	-2862
-237.32	-57.29	-2868
-126.56	-87.69	-2872
496.78	-129.31	-2856
410.66	18.22	-2848
354.81	32.62	-2848
161.05	10.05	-2850
462.2	109.57	-2856
269.77	25.85	-2854
326.66	94.86	-2854
276.26	-63.32	-2866
379.37	35.01	-2868
137.4	9.77	-2868
146.26	-1.57	-2868
308.25	37.24	-2874
297.78	-6.04	-2878
482.52	-43.66	-2878
490.67	-69.96	-2886
354.46	10.99	-2884
428.82	-86.77	-2884
193.46	19.57	-2884
339.32	135.7	-2882
233.97	114.94	-2882
448.58	141.75	-2860
198.73	175.24	-2844
192.57	147.12	-2846
456.93	316.12	-2866
291.32	212.79	-2852
-320.57	239.39	-2626
-428.18	33.01	-2628
-240.47	-137.02	-2634
-254.72	-149.79	-2640
63.21	26.62	-2638
175.24	129.1	-2618
81.02	128.26	-2620
377	313.77	-2624
285.71	196.63	-2626
190.66	305.85	-2630
489.14	110.34	-2628
529.16	66.57	-2640
297.8	109.5	-2622
415.04	-253.23	-2620
306.54	-69.79	-2634
373.28	-92.82	-2638
555.94	-73.3	-2646
439.24	28.57	-2646
340.62	93.95	-2400
-344.49	160.7	-3538
-226.19	-209.84	-3542
198.67	110.56	-3506
207.65	120.12	-3524
319.05	94.85	-3530
261.32	188.88	-3520
172.08	138.44	-3540
358.9	-39.17	-3524
306.5	286.08	-3030
429.68	110.9	-3054
385.8	-32.17	-3050
507.74	84.87	-3036
435.2	13.34	-3034
413.48	-212.18	-3036
549.38	-209.13	-3038
368.18	-233.37	-3046
304.96	-121.65	-3038
350.71	-65.25	-3058
212.23	-83.65	-3044
213.95	-62.42	-3040
193.81	-51.67	-3044
-194.24	-123.74	-3062
-256.04	-274.03	-3062
-112.44	-169.8	-3050
-271.52	-135.92	-3048
-392.42	-109.33	-3028
163.54	183.91	-2540
182.56	239.8	-2540
153.59	107.51	-2540
147.2	73.92	-2540
110.68	30.08	-2540
150.83	39.85	-2540
94.54	17.41	-2540
153.35	174.76	-2540
145.41	291.93	-2540
176.75	36.25	-2540
211.21	167.55	-2540
32.73	-20.64	-2544
228.22	1.89	-2542
212.02	-43.98	-2542
-160.54	-236.6	-2524
-250.33	-217.09	-2524
-283.56	-327.12	-2518
-109.43	-121.06	-2508
436.91	95.83	-2510
510.1	96.69	-2510
428.16	-9.46	-2522
431.63	21.64	-2522
296.03	45.18	-2522
308.11	110.45	-2528
472.87	48.61	-2536
505.96	202.29	-2536
398.11	-182.79	-2536
304.74	-55.26	-2538
487.33	-47.01	-2544
480.38	20.14	-2544
433.99	153.32	-2548
279.08	178.18	-2508
317.31	222.25	-2514
239.63	243.7	-2522
401.71	230.39	-2522
169.93	167.26	-4018
55.88	-25.45	-3550
-286.49	-40.74	-3552
-243.83	-91.68	-3556
351.99	137.72	-3536
294.11	160.73	-3058
351.66	235.19	-2598
216.68	-109.75	-2578
373.86	-85.26	-2576
268.09	-1.68	-2588
-69.19	-87.46	-4548
-230.06	-103.94	-4032
-203.4	-168	-4038
-250.48	-83.95	-4040
-195.04	-124.04	-4046
-274.48	-132.02	-4052
396.95	26.28	-4030
409.29	-68.8	-4040
295.71	-4.73	-4040
328.39	113.75	-4048
337.41	24.33	-4050
276.21	54.85	-4058
269.42	-60.88	-4058
331.96	122.71	-4060
-299.03	-30.33	-3560
-249.28	-20.46	-3572
399.7	-58.44	-3560
405.98	-39.83	-3566
294.39	157.97	-3562
233.07	267.27	-3572
347.95	85.29	-3578
240.17	110.12	-3590
62.06	33.14	-3076
-100.92	-74.4	-3076
-192.12	41.18	-3090
-79.23	-91.11	-3088
-342.58	31.8	-3098
417.05	187.83	-3102
411	98.97	-3098
209.27	102.29	-3102
380.72	-61.11	-3088
249.76	255.68	-3088
340.65	149.22	-3078
417	163.88	-3074
402.63	42.4	-3078
336.43	281.31	-3076
209.29	-18.71	-3074
167.31	10.35	-3076
450.73	-40.21	-3070
327.54	124.43	-3070
212.06	131.23	-3070
404.04	-12.76	-3066
272.17	178.43	-3080
-232.52	237.35	-2608
220.29	10.37	-2598
-68.19	-109.23	-2612
120.03	72.03	-2614
-257.18	-144.93	-2620
-89.92	-126.87	-2616
505.46	-43.37	-2592
447.2	1.82	-2590
523.79	143.95	-2590
423.69	112.67	-2592
403.72	93.58	-2590
395.45	-7.72	-2598
340.52	29.48	-2598
310.76	89.65	-2600
285.56	-27.42	-2602
321.39	215.46	-2602
278.95	140.44	-2608
186.67	271.46	-2606
370.72	17.57	-2608
439.67	98.9	-2612
490.56	178.98	-2614
470.51	148.26	-2616
283.54	192.65	-2616
409.75	88.94	-2620
301.53	31.42	-2618
113.19	107.61	-2610
515.86	-114.92	-2602
392.53	-72.53	-2616
514.581	-158.256	-2789.86
484.29	-6.90209	-2789.37
577.767	-201.429	-2782.85
371.214	52.4369	-2783.93
414.676	300.354	-2783.47
384.961	299.4	-2782.99
379.689	321.088	-2784.04
281.175	49.3086	-2787.64
216.597	170.479	-2790.34
166.785	118.95	-2789.61
98.4591	82.9178	-2791.93
257.991	141.49	-2784.98
227.204	124.901	-2787.02
224.622	186.424	-2786.66
178.901	191.142	-2786.87
163.332	170.381	-2788.03
148.519	140.617	-2786.95
104.877	174.431	-2788.91
82.3717	328.379	-2788.56
85.8952	129.233	-2786.37
-12.1019	102.704	-2788.64
-299.698	-262.705	-2798.91
-316.386	-282.009	-2797.63
-203.481	-239.389	-2803.86
-205.994	-225.879	-2803.81
-246.556	-229.653	-2802.69
-300.402	-13.5305	-2800.84
-249.803	-191.386	-2798.29
-262.218	57.2361	-2794.38
-312.536	41.0591	-2793.68
-72.8704	105.334	-2796.36
-114.056	242.262	-2797.01
-274.443	288.023	-2794.89
-356.09	-374.239	-2800.92
-485.425	-69.3673	-2800.18
-351.812	207.804	-2800.16
-357.349	160.102	-2799.24
-407.65	124.247	-2801.1
-376.364	150.773	-2799.29
-405.974	142.681	-2798.68
515.9	-268.192	-2718.38
519.826	-192.905	-2718.38
411.574	20.6739	-2718.38
335.181	85.5414	-2718.38
543.572	-187.114	-2711.52
385.435	-25.0031	-2710.17
369.612	42.9783	-2709.65
298.573	57.7517	-2709.82
547.955	106.704	-2718.38
520.534	156.113	-2718.38
474.966	146.743	-2718.38
396.487	198.611	-2718.38
376.74	166.702	-2718.38
368.661	91.5842	-2718.38
321.253	106.424	-2718.38
422.741	158.119	-2714.3
415.956	206.347	-2715.62
383.652	157.29	-2715.69
378.804	200.333	-2716.03
426.262	112.094	-2711.18
124.387	51.6912	-2718.38
123.479	41.2441	-2718.38
108.849	54.2454	-2718.38
71.2599	46.8008	-2712.43
177.904	253.245	-2718.38
43.0944	164.502	-2718.38
22.9934	174.984	-2718.38
17.1184	192.678	-2718.38
8.11297	90.5994	-2718.38
-35.477	395.943	-2718.38
150.583	131.894	-2713.89
134.412	154.992	-2714.04
125.526	279.416	-2711.29
175.732	137.252	-2708.94
-32.7997	418.778	-2718.38
-333.155	-54.5828	-2718.38
-184.633	-124.823	-2708.7
-79.5308	104.867	-2718.38
-105.106	223.475	-2718.38
-110.059	231.962	-2718.38
-158.128	156.04	-2718.38
-267.847	264.654	-2718.38
-288.957	256.004	-2718.38
-315.126	245.483	-2718.38
-122.879	106.021	-2711.92
-220.354	133.962	-2708.24
-471.782	-277.33	-2712.82
-424.496	18.416	-2709.84
494.015	-251.705	-2638.38
590.289	-115.702	-2638.38
489.77	70.6518	-2638.38
465.437	130.596	-2638.38
440.882	119.634	-2638.38
525.465	-30.4615	-2636.44
347.178	24.9534	-2633.81
364.126	218.362	-2638.38
330.338	216.732	-2638.38
377.979	312.975	-2633.83
306.765	105.607	-2638.38
257.894	56.7535	-2638.38
179.103	123.267	-2638.38
78.5066	57.3916	-2638.38
211.62	185.688	-2638.38
195.185	161.787	-2638.38
91.6666	166.659	-2638.38
70.6051	277.15	-2638.38
51.4873	200.671	-2638.38
43.6081	242.539	-2638.38
32.395	208.469	-2638.38
184.511	253.607	-2633.62
149.777	161.764	-2635.84
121.296	406.266	-2633.59
73.1054	223.203	-2635.97
-112.872	-212.995	-2638.38
-205.219	-209.689	-2635.63
-111.59	-93.0476	-2638.38
-142.911	-155.099	-2638.38
-249.303	-97.6479	-2638.38
-92.0785	-146.426	-2635.41
-316.957	59.6314	-2632.15
-59.6952	313.036	-2638.38
-76.6304	181.334	-2638.38
-333.437	-95.7459	-2638.38
-450.415	0.453094	-2638.38
376.148	-266.319	-2558.38
469.999	-297.341	-2556.46
362.623	-43.026	-2558.38
438.033	-154.946	-2551.58
467.861	-57.2046	-2547.65
395.454	50.8487	-2547.8
520.784	250.721	-2554.86
383.075	206.254	-2549.62
327.234	60.3381	-2558.38
311.818	40.9025	-2550.9
51.3673	63.6421	-2552.8
262.213	41.3549	-2549.69
96.0199	81.5324	-2548.47
233.332	149.103	-2550.64
214.536	310.181	-2553.34
185.137	320.589	-2552.69
90.7539	113.173	-2550.8
187.921	209.519	-2548.75
151.145	116.177	-2547.15
-136.14	-143.074	-2558.38
-148.73	62.9565	-2555.32
-33.5579	15.5916	-2548.9
-107.433	-101.136	-2549.52
-64.6164	147.119	-2555.74
-88.802	148.891	-2556.7
-317.838	-262.256	-2550.18
-336.651	-138.582	-2558.38
117.295	79.8985	-2546.85
397.264	-253.555	-2475.36
534.997	-149.436	-2478.38
505.534	66.7144	-2478.38
492.633	97.3872	-2478.38
443.057	-12.2859	-2478.38
384.604	-54.4537	-2478.38
375.471	30.4071	-2478.38
520.718	-22.8518	-2476.66
465.574	-159.093	-2475.93
339.368	43.6429	-2472.89
335.788	211.883	-2478.38
391.267	128.736	-2471.94
305.494	-254.719	-2475.31
260.077	105.125	-2478.38
207.958	66.4198	-2478.38
64.0952	115.495	-2478.38
230.682	24.6391	-2474.89
97.9091	-7.097	-2474.11
262.634	82.5476	-2472.42
250.063	67.9774	-2472.89
196.151	93.6345	-2472.67
97.9907	69.8737	-2470.42
191.445	58.5198	-2469.24
140.172	94.9821	-2469.09
320.519	213.67	-2478.38
301.167	203.688	-2478.38
275.021	141.542	-2478.38
226.639	122.931	-2478.38
145.923	150.336	-2478.38
89.3586	151.525	-2478.38
239.947	299.569	-2475.62
181.558	324.627	-2474.5
37.7306	261.832	-2476.59
267.488	255.716	-2471.14
251.213	204.311	-2471.57
232.619	340.735	-2472.95
127.431	187.258	-2471.82
58.6964	156.993	-2471.75
288.367	429.754	-2469.55
128.383	120.907	-2469.14
-14.6647	86.1054	-2478.38
-22.8942	-194.944	-2467.38
-42.8353	10.3225	-2467.98
-146.007	-130.608	-2468.56
-199.88	69.0554	-2469.54
7.10762	231.552	-2472.04
-324.954	93.5105	-2467.13
-319.067	-419.828	-2462.18
-387.756	-366.571	-2462.18
-375.877	-196.961	-2466.79
-550.979	112.78	-2463.92
-370.422	110.665	-2462.18
