# Supplementary material for: Spinal premotor interneurons controlling antagonistic muscles are spatially intermingled
Source: eLife. 2022 Dec 13;11:e81976. doi: 10.7554/eLife.81976 (PMC9844990; doi:10.7554/eLife.81976)
Supplement: Figure 3—figure supplement 2—source data 2. [file elife-81976-fig3-figsupp2-data2.xlsx]

## Sheet: Sheet1
-374.61	-147.45	-2372
455.68	51.28	-2368
491.35	105.76	-2370
223.23	115.34	-2376
520.42	289.48	-2386
345.98	193.32	-2388
227.5	178.35	-2386
327.98	111.13	-2390
326.94	192.58	-2392
536.87	55.65	-2398
420.32	242.79	-2146
419.76	30.33	-2162
373.77	28.52	-2160
-145.51	-183.89	-1900
-279.66	20.38	-1910
-143.11	-110.7	-1912
417.46	130.98	-1890
554.59	63.15	-1898
472.35	40.31	-1902
362.23	-17.83	-1904
441.96	180.19	-1914
482.69	148.71	-1918
632.29	70.19	-1914
455.92	47.64	-1922
503.26	3.54	-1922
774.38	-216.06	-1906
450.52	-257.53	-1914
-260.73	-259.28	-1654
-168.14	-172.44	-1672
-239.19	-161.22	-1676
-306.89	-226.18	-1684
450.96	227.15	-1664
352.62	270.72	-1670
248.11	143.31	-1670
498.22	91.78	-1672
313.26	210.18	-1682
564.3	131.73	-1652
447.15	-222.14	-1654
587.22	61.06	-1656
488	-86.92	-1650
541.39	-114.11	-1664
543.38	-82.31	-1672
623.36	-18.12	-1666
406.27	78.14	-1678
461.94	-132.81	-1684
-71.52	-53.89	-2378
180.05	277.98	-2370
368.58	105.24	-2374
233.41	68.51	-2386
213.19	189.69	-2390
397.17	88.61	-2400
291.71	-67.61	-2372
381.99	83.95	-2170
53.96	234.27	-2174
251.34	152.17	-2182
278.84	213.14	-2194
-42.55	36.02	-2200
226.1	232.53	-2206
367.74	31.21	-2212
408.09	94.79	-2212
410.61	-72.5	-2172
374.4	-122.49	-2178
420.27	-93.71	-2194
380.4	-32.05	-2192
171.18	164.8	-1894
483.41	-116.15	-1912
347.32	-21.29	-1910
443.8	28.88	-1906
444.3	-75.6	-1896
24.08	-62.98	-1610
148.79	87.08	-1614
-74.53	-130.07	-1618
-180.43	7.42	-1622
104.53	84.29	-1630
7.97	-66.69	-1640
544.92	-136.23	-1608
526	-141.31	-1616
245.82	16.21	-1618
334.01	-71.74	-1618
514.19	12.32	-1624
513.3	-89.11	-1636
469.64	15.86	-1638
260.11	95.47	-1608
372.9	293.32	-1612
59.74	158.93	-1614
123.75	381.79	-1614
241.69	100.5	-1620
185.97	367.02	-1624
280.98	95.37	-1628
453.83	48.3	-1634
460.94	102.67	-1638
461.99	195.27	-1640
325.96	255.83	-1636
287.95	279.21	-1642
-107.06	-202.29	-2366
-15.11	-125.33	-2368
341.93	156.91	-2370
-179.96	-113.33	-2378
38.79	-3.56	-2386
340.62	93.95	-2400
126.26	40.24	-2132
177.54	306.51	-2130
304.73	224.24	-2128
333.56	129.78	-2134
296.86	222.94	-2136
397.65	290.31	-2140
333.02	301	-2148
300.89	170.54	-2142
235.08	149.89	-2142
119.17	51.76	-2144
329.52	66.83	-2150
490.55	125.67	-2154
361.79	168.47	-2152
217.3	201.75	-2158
563.91	79.51	-2160
353.71	150.99	-2164
283.9	84.68	-2164
366.27	-51.12	-2138
436.29	-28.05	-2138
303.39	-54.57	-2138
400.11	-224.92	-2138
475.04	-21.66	-2138
323.12	-9.79	-2138
476.37	-61.24	-2138
578.34	-67.5	-2138
383.6	-142.28	-2138
431.39	-50.77	-2138
-185.19	-117.41	-2180
-256.06	-146.7	-2190
282.97	159.46	-2154
255.87	237.21	-1890
504.6	365.83	-1894
394.84	258.17	-1896
139.49	116.68	-1896
452.61	123.48	-1896
260.98	182.23	-1890
428.1	122.86	-1898
504.86	126.52	-1896
398.89	321.74	-1912
313.61	289.17	-1914
349.39	305.29	-1916
558.64	389.49	-1916
464.63	170.17	-1912
552.4	193.02	-1910
201.88	355.03	-1914
438.34	265.29	-1914
201.59	130.19	-1912
283.85	247.48	-1904
130.43	317.59	-1902
330.58	144.09	-1902
557.71	182.62	-1914
360.34	257.3	-1912
342.31	50.95	-1892
356.12	13.78	-1892
625.1	-74.27	-1896
382.49	-86.77	-1894
611.39	5.12	-1898
502.01	34.18	-1898
311.18	10.81	-1900
564.42	-53.36	-1904
446.82	-36.28	-1904
449.44	-291.36	-1904
501.81	-153.7	-1914
551.68	-164.22	-1914
587.2	-55.18	-1914
501.68	6.41	-1914
459.26	69.51	-1910
645.63	121.49	-1912
138.55	156.87	-1892
71.47	118.26	-1896
-135.97	258.34	-1906
96.64	39.57	-1914
11.02	150.93	-1914
-414.11	63.87	-1890
-238.63	-137.31	-1898
-306.21	-259.07	-1898
-322.16	-153	-1900
-139.97	-147.59	-1912
-833.35	319	-1662
-436.01	295.31	-1682
-474.79	319.42	-1654
-549.33	-2.82	-1654
-212	-187.86	-1652
-186.58	-286.14	-1656
-146.41	-158.77	-1654
-210.49	-167.02	-1662
-172.69	-247.72	-1670
-122.86	-203.58	-1680
-258.19	-144.1	-1682
531.51	399.67	-1656
529.73	249.31	-1670
602	224.76	-1660
615.91	227.1	-1670
473.65	258.56	-1664
457.01	290.51	-1662
404.93	221.57	-1658
427.47	245.09	-1678
483.95	190.83	-1674
368	191.68	-1676
155.27	276.66	-1652
172.23	262.84	-1652
376.19	193.93	-1650
396.98	192.76	-1654
154.55	208.42	-1654
578.58	234.49	-1656
227.46	190.84	-1670
225.16	247.07	-1670
362.17	173.1	-1670
79.92	230.79	-1674
295.66	205.92	-1672
221.9	4.82	-1658
425.21	-83.14	-1658
354.11	56.99	-1658
311.62	9.42	-1658
241.43	93.94	-1658
423.36	-42.66	-1652
412.53	-24.49	-1652
470.38	-38.13	-1652
487.87	-28.18	-1652
508.22	-26.33	-1652
562.89	73.65	-1652
589.27	-83.84	-1652
477.85	-135.9	-1652
418.19	-175.75	-1652
360	150.15	-1652
584.84	-29.56	-1678
452.61	180.52	-1682
455.22	162.52	-1682
634.72	-48.55	-1676
551.89	-62.41	-1674
604.96	47.39	-1650
403.74	23.65	-1670
604.46	76.27	-1652
620.45	-175.77	-1682
-438.56	311.45	-1676
-281.99	-220.09	-2060
-187.21	-195.17	-2110
392.23	180.19	-2090
280.04	45.72	-2122
389.91	185.8	-2122
401.85	85.75	-2098
343.47	-144.62	-2102
420.88	179.3	-2124
78.73	78.13	-1618
-332.52	-111.28	-2120
-371.2	-219.02	-2124
-223.76	-109.42	-2126
-486.01	65.66	-2122
-254.13	-101.55	-2132
-113.93	-148.83	-2132
-117.03	-185.57	-2136
-288.63	-58.53	-2134
-272.07	35.34	-2136
-176.91	-39.16	-2144
53.54	30.08	-2122
-309.43	-273.48	-2112
-141.81	240.74	-2130
-52.82	199.47	-2142
520.67	46.39	-2108
437.53	35.7	-2112
509.76	93.26	-2112
430.46	104.66	-2112
207.4	147.06	-2114
133	164.75	-2116
112.51	244.64	-2116
400.71	205.86	-2118
296.39	184.56	-2120
443.42	153.09	-2120
224.46	291.16	-2124
234.41	265.42	-2122
373.21	216.15	-2124
303.83	208.47	-2126
313.39	112.83	-2128
180.73	202.52	-2126
145.47	232.91	-2128
148.65	141.52	-2136
288.99	142.32	-2138
302.49	71.77	-2140
214.52	85.42	-2144
346.55	167.35	-2146
465.09	39.73	-2148
468.1	69.94	-2150
562.48	24.39	-2150
441.42	55.79	-2156
396.04	45.99	-2154
425.5	185.98	-2154
302.92	232.25	-2154
289.89	162.51	-2158
215.16	71.33	-2156
126.34	266.63	-2158
154.31	210.99	-2120
451.5	19.36	-2120
490.82	28.7	-2122
444.3	43.38	-2124
380.23	186.16	-2130
238.22	245.55	-2140
64.96	-129.41	-2116
209.1	32.04	-2110
411.27	-29.99	-2116
390.37	-34.75	-2118
97.99	20.35	-2120
394.48	-116.48	-2138
376.26	-52.93	-2132
469.42	-60.45	-2108
367.89	-215.27	-2118
542.35	-54.29	-2120
465.35	-25.84	-2116
547.36	-117.63	-2118
480.95	-86	-2124
551.58	-42.94	-2130
446.98	5.04	-2126
549.77	-133.55	-2144
473.24	-38.92	-2150
445.99	-82.42	-2136
-501.28	2.55	-1620
-310.1	-200.26	-1626
-139.64	-190.23	-1634
-255.16	-171.3	-1640
-345.29	-104.95	-1648
-166.68	-87.3	-1652
-121.47	-30.78	-1648
-112.5	-143.26	-1660
-219.86	-193.58	-1658
-351.56	142.88	-1646
434.34	89.13	-1624
608.26	68.01	-1626
431.77	226.19	-1628
256.01	124.94	-1628
195.79	132.64	-1626
194.54	161.21	-1626
236.38	258.52	-1634
331.14	155.38	-1636
387.21	159.96	-1636
301.15	106.02	-1638
168.24	128.11	-1636
154.65	269.39	-1638
596.7	106.38	-1636
237.68	230.74	-1626
619.02	177.04	-1642
552.26	71.86	-1646
416.75	149.51	-1648
561.8	11.11	-1650
585.13	92.96	-1654
511.65	115.03	-1654
548.95	62.81	-1652
230.78	52.43	-1652
260.72	64.05	-1650
445.74	143.52	-1652
469.43	136.2	-1650
418.4	91.2	-1662
323.56	178.28	-1666
242.43	89.54	-1666
247.81	114.54	-1664
172.77	174.44	-1662
571.15	79.67	-1664
163.57	152.86	-1666
413.63	283.8	-1640
370.55	244.78	-1640
448.4	317.64	-1640
217.26	128.66	-1646
450.47	149.28	-1666
330.17	189.16	-1626
662.2	-151.37	-1660
335.42	5.98	-1664
280.03	-106.75	-1656
547.72	-82.75	-1648
304.37	-270.21	-1648
589.97	-128.56	-1642
570.89	-147.22	-1640
485.42	-96.18	-1642
459.13	-21.28	-1640
510.15	-41.71	-1636
487.34	-23.23	-1638
639.15	-9.33	-1630
300.76	2.53	-1632
522.389	-105.41	-1990.27
410.734	-93.4845	-1995.83
233.309	302.436	-1997.88
-130.928	-234.781	-1993.05
495.154	-27.1772	-1913.05
334.548	-333.666	-1913.05
273.789	87.6922	-1915.83
-251.469	-192.307	-1918.61
-328.698	-172.837	-1913.05
395.083	91.2603	-1913.05
498.546	-74.4511	-1913.05
604.205	-146.423	-1913.05
-392.982	113.963	-1838.61
-183.217	-176.395	-1838.61
126.995	90.9643	-1838.61
480.292	-77.7663	-1838.61
461.032	90.1064	-1833.05
319.771	232.722	-1758.61
343.14	9.59739	-1758.61
433.024	-81.7391	-1758.61
527.912	-147.295	-1758.61
586.917	20.5938	-1758.61
-261.033	-170.645	-1678.61
-314.874	-258.236	-1673.05
585.547	119.285	-1664.71
445.188	73.0269	-1670.27
522.896	-72.0555	-1670.27
496.713	-65.6135	-1667.49
489.825	-178.354	-1670.27
433.378	-88.7997	-1673.05
298.791	-286.687	-1667.49
206.64	22.9308	-1673.05
192.918	183.035	-1600.16
592.645	107.368	-2398.38
460.173	5.61859	-2398.38
423.23	-63.9098	-2398.38
390.869	-96.6234	-2398.38
518.395	182.555	-2398.38
433.955	338.074	-2398.38
327.113	259.588	-2398.38
319.476	138.816	-2398.38
171.31	-344.363	-2398.38
26.2457	-321.07	-2398.38
154.205	-409.456	-2394.54
266.987	40.1672	-2398.38
26.0743	90.0438	-2398.38
10.1095	-85.6519	-2394.59
253.591	254.216	-2398.38
252.658	269.72	-2398.38
232.344	143.141	-2398.38
68.8808	397.894	-2398.38
46.7615	185.812	-2398.38
18.3333	237.258	-2398.38
280.059	261.783	-2396.56
56.811	231.168	-2395.13
118.932	143.481	-2391.97
49.4589	124.693	-2391.38
49.5997	150.307	-2393.03
-292.309	-258.538	-2393.16
-141.677	69.5432	-2398.38
-155.016	8.75568	-2393.91
-165.829	38.7381	-2395.34
-187.871	-177.217	-2394.38
-216.949	-202.634	-2394.07
-252.057	-184.759	-2394.45
-236.396	-36.3591	-2391.97
-260.704	-32.2072	-2391.14
-299.79	-43.365	-2391.74
-153.613	-177.832	-2388.68
-220.529	-126.45	-2387.93
-237.879	-14.3217	-2389.18
-174.294	125.19	-2388.75
-367.349	61.7226	-2392.1
-426.888	-263.001	-2382.18
-417.399	142.895	-2383.97
528.155	-447.035	-2318.38
434.067	-231.825	-2318.38
398.61	-341.391	-2318.38
527.021	62.436	-2318.38
502.386	16.8263	-2318.38
475.424	-135.69	-2318.38
462.971	7.81342	-2318.38
331.597	79.5317	-2318.38
301.01	-230.26	-2314.12
386.98	387.924	-2318.38
375.494	308.442	-2318.38
331.994	181.121	-2318.38
222.349	-77.163	-2318.38
191.672	85.598	-2318.38
10.8713	-152.706	-2318.38
251.933	123.875	-2318.38
224.282	156.065	-2318.38
198.849	377.594	-2318.38
178.795	401.126	-2318.38
159.273	333.534	-2318.38
56.0827	154.839	-2318.38
55.2357	171.347	-2318.38
21.4876	278.508	-2318.38
180.38	221.655	-2314.91
157.257	365.034	-2316.71
106.485	119.9	-2315.55
198.282	435.577	-2318.38
-259.888	-262.127	-2318.38
-374.792	-245.755	-2312.33
-169.627	-21.0843	-2318.38
-173.097	-217.215	-2318.38
-260.494	-215.306	-2312.17
-378.562	115.519	-2309.8
-386.662	-355.846	-2313.42
-471.7	-243.982	-2312.06
-459.482	-198.749	-2311.5
-482.71	-214.695	-2312.23
445.083	-239.544	-2238.38
518.705	23.9678	-2238.38
488.753	41.2766	-2238.38
394.359	31.2918	-2238.38
360.025	-23.9245	-2238.38
355.468	95.8859	-2238.38
415.302	-79.7101	-2234.69
400.643	7.6932	-2234.45
549.715	244.904	-2238.38
502.757	246.954	-2238.38
408.195	257.186	-2238.38
389.571	368.361	-2238.38
468.963	171.044	-2234.59
326.091	-30.2346	-2238.38
220.53	105.842	-2238.38
206.535	59.1479	-2238.38
115.408	96.1851	-2238.38
107.711	113.919	-2238.38
83.9584	80.8552	-2238.38
293.165	0.929501	-2236.47
49.5867	62.1328	-2234.55
145.845	33.1486	-2232.01
299.828	192.067	-2238.38
267.783	244.571	-2238.38
73.1758	139.1	-2238.38
301.602	206.7	-2234.4
264.961	232.05	-2234.76
275.467	181.047	-2232.73
-34.1852	-226.842	-2238.38
-229.898	-284.49	-2238.38
-246.424	-311.449	-2230.92
-221.17	-219.173	-2227.62
-85.3102	56.8596	-2238.38
-101.893	70.7256	-2238.38
-148.908	-32.4586	-2232.09
10.3633	179.071	-2238.38
-312.194	67.21	-2228.66
-345.564	291.286	-2235.14
-430.577	133.394	-2228.39
579.093	-85.0652	-2151.06
408.532	160.786	-2153.69
426.478	58.3839	-2149.64
-8.62234	-117.223	-2152.41
268.513	128.583	-2158.38
302.472	257.147	-2151.35
284.336	289.497	-2150.65
52.8448	74.1673	-2153.34
48.8699	107.285	-2152.01
303.861	205.367	-2148.54
113.837	66.7673	-2148.8
-125.061	-419.747	-2152.53
-257.979	-282.993	-2152.35
-69.3587	-166.672	-2153.57
-174.955	-142.217	-2151.31
-197.87	-73.6378	-2151.11
-248.313	-58.0932	-2151.87
-210.891	-89.3446	-2149.18
-152.32	110.537	-2151.06
-164.474	117.312	-2150.54
-378.078	289.927	-2150.57
462.477	-130.851	-2145.06
422.867	-59.8218	-2144.15
290.27	-35.8864	-2145
138.068	-51.1061	-2146.43
281.098	316.423	-2144.34
144.092	92.4399	-2142.18
-146.255	84.1379	-2146.48
-398.355	141.188	-2144.19
364.14	-374.732	-2078.38
445.587	-331.849	-2076.02
450.448	-230.814	-2073.08
496.823	-224.967	-2067.8
522.3	-195.42	-2078.38
499.402	-26.054	-2078.38
468.882	-56.6722	-2078.38
414.657	-3.85152	-2078.38
391.575	50.2279	-2078.38
474.469	-64.6048	-2073.05
324.604	-24.8475	-2072.53
414.394	86.9433	-2067.45
377.385	177.04	-2078.38
340.48	189.659	-2073.74
420.597	259.423	-2070.5
427.708	403.58	-2068.69
233.206	-313.765	-2078.38
102.45	82.964	-2078.38
96.4436	25.0379	-2078.38
75.4218	28.0214	-2078.38
59.3932	64.999	-2078.38
-3.16021	89.039	-2078.38
-5.55596	-78.0698	-2076.42
211.407	-9.46443	-2071.23
271.639	85.6305	-2068.88
148.429	52.747	-2068.78
92.8356	13.4463	-2067.16
287.191	222.273	-2078.38
274.384	193.594	-2078.38
230.023	162.025	-2078.38
174.633	214.561	-2078.38
218.21	192.441	-2076.34
127.168	154.049	-2075.75
255.731	160.915	-2073.15
175.71	365.83	-2069.74
-267.164	-305.438	-2073.24
-257.31	-176.9	-2078.38
-26.0536	-23.0673	-2075.91
-234.961	-48.8948	-2073.27
-142.554	318.157	-2072.85
-384.833	-251.164	-2078.38
-401.64	-244.588	-2076.58
-407.917	-342.595	-2071.29
-367.223	82.6943	-2072.83
-528.938	232.504	-2078.38
-559.523	231.753	-2075.22
554.272	-268.642	-1998.38
496.064	-354.839	-1998.38
564.4	-135.448	-1998.38
512.943	-126.192	-1998.38
443.862	76.0174	-1998.38
390.487	40.9849	-1998.38
538.714	-59.1505	-1994.29
370.246	58.7898	-1995.1
471.216	-98.8145	-1991.79
383.639	-80.1311	-1990.74
606.587	42.9407	-1989.11
424.6	-47.0195	-1988.78
317.376	140.335	-1998.38
349.49	268.902	-1996.73
395.168	234.669	-1990.52
370.624	251.933	-1991.7
314.324	269.222	-1991.31
304.827	402.613	-1991.78
332.913	337.489	-1989.73
268.031	-242.987	-1989.59
268.573	109.412	-1998.38
249.196	-119.44	-1998.38
190.121	-144.291	-1998.38
111.519	42.7075	-1998.38
104.488	-100.365	-1992.38
26.4164	-72.0711	-1991.07
60.1695	-20.7718	-1989.48
276.878	344.662	-1998.38
277.43	229.804	-1998.38
273.483	168.936	-1998.38
226.609	280.312	-1998.38
218.56	325.908	-1988.82
-251.262	-287.554	-1998.38
-309.034	-272.143	-1994.64
-300.022	-337.171	-1991.56
-30.0199	-169.4	-1998.38
-85.8122	18.8689	-1998.38
-98.3051	75.7217	-1998.38
-163.88	-184.242	-1998.38
-258.63	-199.841	-1998.38
-17.1175	128.475	-1998.38
-91.2394	136.204	-1998.38
-94.425	185.987	-1998.38
-133.338	151.023	-1998.38
-219.412	186.031	-1998.38
-348.983	29.6858	-1994.81
-360.831	15.6884	-1995.1
-391.71	-201.988	-1989.29
463.98	-224.516	-1912.45
447.167	-53.0771	-1918.38
414.486	92.296	-1918.38
413.735	-63.7595	-1918.38
401.266	54.7362	-1918.38
372.722	56.6689	-1918.38
354.526	40.2674	-1918.38
359.79	-52.9138	-1918.38
517.446	-89.0206	-1913.96
379.964	17.3878	-1908.64
347.592	-66.9663	-1909.43
327.447	66.675	-1910.02
367.022	151.25	-1918.38
351.105	262.468	-1918.38
329.552	258.619	-1918.38
308.01	237.359	-1918.38
333.943	176.891	-1916.34
463.164	300.479	-1909.86
347.245	322.695	-1908.72
302.332	399.655	-1908.79
287.075	59.1863	-1918.38
258.869	43.555	-1918.38
246.547	41.2466	-1918.38
90.5104	-79.727	-1918.38
63.5057	-121.309	-1918.38
52.5293	-108.794	-1918.38
7.82036	-79.0373	-1918.38
262.366	75.186	-1913.99
85.1985	-47.8782	-1913.75
235.814	93.2488	-1912.09
9.49898	68.8822	-1910.03
156.721	244.515	-1918.38
138.818	181.32	-1918.38
38.4242	215.127	-1918.38
237.976	186.21	-1914.73
45.5045	309.188	-1914.52
176.943	289.894	-1911.2
297.56	113.813	-1910.07
237.64	137.252	-1909.49
258.305	467.008	-1918.38
-157.956	-262.554	-1918.38
-254.815	-296.374	-1910.99
-280.501	-291.142	-1912.68
-2.47811	-94.9934	-1918.38
-8.14952	-111.052	-1918.38
-276.171	-225.257	-1916.35
-246.196	-23.1614	-1910.94
-88.3065	135.458	-1912.25
-172.593	73.9206	-1912.35
-300.292	-267.094	-1913.28
-340.273	162.194	-1918.38
-466.6	100.841	-1908
599.684	-675.474	-1918.01
581.519	200.51	-1835.34
436.151	-260.622	-1838.38
346.837	-320.656	-1838.38
345.703	-345.338	-1838.38
527.508	-86.2276	-1838.38
504.605	-82.6307	-1838.38
481.231	-134.407	-1838.38
461.97	-57.3028	-1838.38
427.097	-45.3832	-1838.38
411.968	4.37805	-1838.38
404.247	-117.297	-1838.38
398.223	104.317	-1838.38
374.501	46.8929	-1838.38
372.105	101.852	-1838.38
346.647	129.415	-1838.38
332.646	29.3214	-1838.38
526.098	-145.897	-1832.08
292.881	25.9766	-1832.05
431.608	181.766	-1838.38
412.136	310.4	-1838.38
391.884	322.295	-1838.38
371.211	319.209	-1838.38
364.371	303.298	-1838.38
346.609	250.176	-1838.38
326.277	309.654	-1838.38
304.342	284.203	-1838.38
271.509	321.065	-1838.38
262.519	276.579	-1838.38
259.083	249.558	-1838.38
247.578	222.983	-1838.38
377.503	393.087	-1830.51
333.268	242.78	-1831.47
252.606	-337.915	-1838.38
240.969	-335.352	-1838.38
63.1224	-224.402	-1838.38
238.801	-268.316	-1831.66
106.497	39.32	-1838.38
63.9075	97.8308	-1832.78
222.756	174.485	-1838.38
220.636	248.022	-1838.38
204.307	160.885	-1831.57
180.437	342.858	-1832.75
-171.891	-201.489	-1838.38
-237.021	-289.73	-1838.38
-248.599	-230.389	-1838.38
-281.215	-353.161	-1838.38
-153.14	-223.691	-1834.37
-219.402	-291.431	-1834.53
-99.8084	-197.028	-1832.13
-189.146	-183.558	-1838.38
-314.764	-187.548	-1831.33
-224.664	-130.819	-1830.19
-381.861	340.439	-1834.08
-353.156	150.142	-1829.98
-370.241	347.747	-1829.47
586.555	-363.725	-1758.38
490.906	-222.7	-1758.38
491.062	-251.614	-1758.38
561.555	-220.109	-1756.16
554.494	110.214	-1758.38
495.539	-29.613	-1758.38
461.202	-79.5906	-1758.38
503.908	155.684	-1758.38
445.856	348.284	-1758.38
439.984	430.367	-1758.38
428.056	317.14	-1758.38
420.614	210.629	-1758.38
362.077	-274.009	-1758.38
329.304	-365.186	-1758.38
138.284	-302.537	-1758.38
384.805	68.1455	-1758.38
330.157	66.1994	-1758.38
283.113	-80.714	-1758.38
139.728	47.9614	-1758.38
293.002	95.1137	-1755.83
388.718	297.964	-1758.38
383.795	278.797	-1758.38
370.838	241.864	-1758.38
369.656	207.494	-1758.38
365.539	298.92	-1758.38
366.104	152.108	-1758.38
359.212	175.972	-1758.38
342.738	260.35	-1758.38
337.488	299.563	-1758.38
305.784	274.595	-1758.38
286.727	428.886	-1758.38
259.216	275.617	-1758.38
223.14	198.609	-1758.38
182.778	310.142	-1758.38
166.719	304.505	-1758.38
165.25	209.449	-1758.38
233.704	134.343	-1756.69
328.21	392.429	-1752.7
203.97	119.064	-1752.47
-87.906	-264.829	-1758.38
-105.703	-270.585	-1758.38
-181.753	-286.165	-1758.38
-188.505	-263.194	-1758.38
-186.824	-371.724	-1758.38
-155.368	-263.07	-1755.32
-164.765	-248.374	-1755.12
93.3706	14.3944	-1758.38
35.2267	-115.781	-1758.38
-78.653	-148.364	-1758.38
-106.822	31.7781	-1758.38
-134.623	-221.837	-1758.38
-135.976	-202.17	-1758.38
-193.926	-191.831	-1758.38
-96.2922	-208.074	-1752.92
73.0422	100.945	-1758.38
59.4986	143.033	-1756.34
-267.377	-361.145	-1755.75
-248.137	82.239	-1758.38
-256.859	-121.079	-1758.38
-279.895	95.4891	-1755.14
665.292	-353.898	-1678.38
626.495	-432.937	-1678.38
604.353	-203.995	-1678.38
588.455	-388.501	-1678.38
504.46	-235.898	-1678.38
514.423	-20.533	-1678.38
507.645	-140.206	-1678.38
422.65	-182.487	-1678.38
347.887	-47.7416	-1678.38
655.176	302.404	-1678.38
520.362	278.418	-1678.38
520.325	168.634	-1678.38
514.362	142.739	-1678.38
462.747	333.799	-1678.38
452.817	130.86	-1678.38
445.981	407.072	-1678.38
435.242	299.806	-1678.38
427.59	231.179	-1678.38
417.47	369.933	-1678.38
370.284	378.221	-1678.38
365.884	143.181	-1678.38
361.69	270.148	-1678.38
358.963	393.476	-1678.38
354.361	200.942	-1678.38
106.312	-24.2184	-1678.38
38.0503	36.4929	-1678.38
329.201	194.601	-1678.38
318.996	325.233	-1678.38
314.058	290.275	-1678.38
313.42	122.014	-1678.38
282.943	245.903	-1678.38
272.447	132.253	-1678.38
250.608	191.752	-1678.38
245.409	369.308	-1678.38
244.416	168.24	-1678.38
240.432	133.742	-1678.38
221.492	198.07	-1678.38
217.256	127.31	-1678.38
207.243	285.913	-1678.38
200.091	147.714	-1678.38
150.554	255.738	-1678.38
58.5493	180.122	-1678.38
232.458	493.471	-1678.38
-72.8088	-232.53	-1678.38
-110.978	-304.045	-1678.38
-206.529	-255.568	-1678.38
-218.09	-229.691	-1678.38
-97.432	52.032	-1678.38
-160.77	-54.9736	-1678.38
-350.404	330.829	-1678.38
