# Supplementary material for: Spinal premotor interneurons controlling antagonistic muscles are spatially intermingled
Source: eLife. 2022 Dec 13;11:e81976. doi: 10.7554/eLife.81976 (PMC9844990; doi:10.7554/eLife.81976)
Supplement: Figure 3—figure supplement 2—source data 3. [file elife-81976-fig3-figsupp2-data3.xlsx]

## Sheet: Sheet1
-207.56	-315.44	-1430
-439.49	-309.01	-1428
-451.84	-311.57	-1430
570.35	65.4	-1412
577.3	61.66	-1408
353.42	252.32	-1412
425.49	79.07	-1414
494.72	86.99	-1420
372.15	89.82	-1424
101.54	273.65	-1438
212.21	156.42	-1434
395.01	228.41	-1430
576.06	147.21	-1424
221.31	156.84	-1426
598.57	-449.86	-1416
598.31	-83.24	-1428
459.61	-349.36	-1438
399.82	-74.17	-1438
-175.6	-270.85	-1186
313.42	-28.62	-1190
177.83	92.89	-1172
485.18	126.06	-1172
178.78	148.33	-1174
409.12	240.1	-1180
388.11	163.76	-1180
143.16	281.79	-1182
427.9	220.35	-1190
528.79	-44.02	-1174
610.92	-111.31	-1182
571.79	17.35	-1192
-244.48	-237.68	-942
-265.48	-201.23	-944
-107.19	-109.05	-948
-144.17	-181.57	-962
-445.62	-40.63	-968
489.03	335.11	-930
428.06	98.15	-932
346.54	173.34	-936
267.83	182.38	-940
324.58	130.44	-944
363.12	110.48	-940
408.81	199.39	-934
479.89	193.3	-932
545.47	151	-936
531.04	211.37	-936
557.55	329.01	-944
344.41	311.45	-946
482.05	162.24	-950
508.17	175.88	-942
434.24	208.88	-938
598.73	85.56	-948
418.95	162.33	-952
478.76	202.02	-954
465.86	185.79	-956
339.05	250.05	-958
539.51	57.29	-952
94.38	151.92	-952
634.24	10.65	-960
220.01	353.99	-968
346.16	256.99	-966
416.82	180.6	-966
507.29	167.92	-968
386.61	240.99	-930
331.35	30.43	-932
438.49	-2.42	-936
408.73	-104.71	-942
339.25	48.27	-946
478.93	-73.34	-948
491.3	-35.18	-958
381.08	-11.78	-966
708.34	-214.89	-942
579.05	-371.39	-950
434.54	-337.53	-932
346.45	238.23	-1414
146.42	316.61	-1416
244.28	340.94	-1422
331.55	223.18	-1424
481.3	45.84	-1418
451.99	10.47	-1424
315.24	-19.78	-1424
395.58	70.05	-1438
476.06	-76.41	-1436
36.54	51.98	-1440
631.17	235.47	-1426
-109.97	-187.93	-1188
247.06	110	-1200
406.48	118.25	-1200
393.58	273.81	-1200
438.17	153.11	-1198
572.4	301.76	-1196
657.31	165.5	-1198
282.15	120.4	-1190
388.82	110.09	-1174
388.42	41.48	-1172
571.25	-128.37	-1198
588.26	-73.38	-1198
349.72	-45.47	-1200
484.17	-154.82	-1192
539.65	-17.91	-1190
457.77	-446.49	-1182
438.74	-433.77	-1172
-463.25	253.76	-954
-132.06	-218.51	-948
55.26	-57.88	-960
245.49	341.14	-928
320.68	142.4	-928
450.99	217.54	-930
500.73	229.2	-934
452.33	230.27	-936
531.61	212.58	-938
399.98	121.14	-940
376.37	157.48	-936
208.3	400.7	-944
374	201.71	-944
512.57	280.67	-944
474.51	229.38	-940
502.99	223.05	-942
542.7	407.94	-958
168.45	257.45	-956
315.57	192.09	-954
412.96	125.19	-956
418.44	189.23	-956
330.69	538.14	-958
294	50.72	-926
441.99	18.51	-930
262.06	-15.74	-930
266.41	88.05	-958
488.77	77.73	-958
400.24	-279.72	-940
434.88	-290.59	-956
607.3	-252	-960
678.17	50.63	-942
-337.37	-71.7	-1404
-195.82	-124.48	-1410
-151.3	-106.87	-1420
-313.52	-266.1	-1428
-241.55	-229.24	-1430
-95.14	-147.48	-1432
-176.27	-62.79	-1438
-257.92	-149.33	-1438
-262.2	-260.48	-1434
346.35	265	-1408
219.5	202.87	-1408
142.24	243.58	-1408
210.4	76.08	-1410
396.1	91.51	-1412
400.32	233.73	-1416
130.79	227.1	-1416
401.02	212.05	-1418
228.68	228.93	-1418
516.43	267.82	-1424
493.86	264.07	-1426
412.57	286.01	-1426
138.33	77.96	-1418
398.41	183.91	-1426
326.45	88.3	-1424
107.45	58.08	-1428
353.72	216.99	-1426
216.47	213.89	-1424
166.45	255.81	-1428
155.62	269.02	-1428
177.34	289.96	-1434
492.46	225.7	-1436
543.26	143.09	-1440
448.22	355.59	-1440
158.66	135.4	-1436
120.54	117.03	-1410
343.63	186.26	-1440
660.96	0.25	-1410
564.99	18.36	-1410
457.99	12.52	-1416
585.83	-132.34	-1416
484.39	95.47	-1416
372	-142.26	-1416
308.1	2.82	-1422
551.28	-108.27	-1424
502.45	-225.39	-1430
631.61	26.71	-1428
599	18.38	-1430
537.86	13.64	-1436
311.49	-21.16	-1440
630.4	-19.13	-1428
554.13	-74.16	-1424
300.97	37.23	-1426
-266.61	-200.54	-1166
-186.61	-174.46	-1166
-191.17	-209.75	-1180
-225.81	-131.8	-1188
55.75	-4.04	-1172
424.13	35.8	-1172
449.11	199.52	-1164
188.39	173.5	-1176
182.45	275.27	-1176
255.74	279.43	-1176
376.33	187.81	-1178
511.49	197.99	-1178
606.63	197.1	-1178
508.75	127.81	-1178
159.28	285.41	-1184
202.93	251.26	-1188
332.92	268.9	-1188
464.76	172.46	-1196
241.54	146.6	-1186
440.41	65.13	-1186
670.32	198.7	-1190
532.4	37.4	-1182
562.76	216.56	-1178
603.13	47.05	-1176
451.56	251.48	-1174
441.34	228.89	-1168
251.99	1.5	-1174
587.67	40.42	-1166
602.39	27.88	-1180
636.42	43.95	-1184
654.87	-30.79	-1182
728.8	-193.09	-1182
368.82	-165.44	-1182
718.57	-122.44	-1176
561.22	-125.27	-1172
529.26	-196.17	-1172
430.37	-379.97	-1172
296.68	-39.83	-1194
400.91	-34.71	-1194
448.18	-73.61	-1194
314.36	-364.51	-1190
401.2	-320.27	-1194
448.73	-12.54	-1176
620.21	-395.01	-1186
526.5	-452.56	-1182
-97.72	-116.84	-928
-194.14	-211.41	-950
13.38	-54.84	-958
-221.82	-224.44	-960
-108.98	18.54	-930
-295.44	-14.23	-946
234.68	-79.11	-930
252.37	62.84	-952
243.68	77.22	-952
-332.33	350.44	-930
354.02	235.72	-928
325.8	114.61	-928
69.91	225.71	-930
457.2	222.38	-930
568.71	110.43	-932
165.47	294.39	-936
316.54	299.49	-938
306.02	257.27	-940
477.83	299.84	-940
477.79	439.27	-936
587.7	259.78	-940
543.86	261.29	-942
605.33	228.9	-942
421.67	173.47	-940
475.03	194.14	-940
365.06	227.72	-942
602.53	118.03	-942
336.92	188.83	-948
299.48	113.19	-952
526.84	298.34	-954
521.18	257.33	-958
460.63	251.64	-960
443.03	186.13	-960
184.82	272.12	-958
149.9	231.1	-954
199.72	217.75	-952
67.1	150.99	-958
307.86	206.95	-954
423.11	92.06	-928
221.36	320.43	-952
465.26	472.81	-934
550	43.08	-932
613.72	46.83	-934
524.85	-18.93	-938
602.54	-28.76	-940
634.04	-97.73	-942
648.67	-74.96	-946
725.99	-128.8	-946
343.66	-65.09	-948
389.36	43.13	-944
462.92	77.4	-940
601.65	85.29	-954
376.08	-7.77	-956
649.42	6.56	-960
692.62	-174.16	-952
513.51	-155.55	-936
338.49	-97.82	-928
419.97	-353.69	-936
619.07	-357.09	-944
482.89	-405.08	-944
548.65	-237.65	-960
-280.55	-203.77	-1550
-331.33	-184.66	-1558
-193.71	-122.48	-1570
232.5	300.7	-1534
364.82	311.95	-1536
472.4	272.23	-1536
362	187.47	-1536
210.84	288.6	-1540
206.68	194.32	-1538
487.85	150.38	-1540
497.5	229.01	-1544
265.59	190.47	-1548
237.19	162.62	-1550
238.19	161.83	-1550
238.19	161.83	-1550
237.8	161.33	-1564
231.44	161.48	-1566
216.56	164.68	-1572
159.66	208.64	-1574
141.98	239.15	-1578
214.3	259.56	-1578
245.14	354.31	-1578
251.77	363.26	-1578
209.66	237.71	-1576
205.75	247.67	-1576
467.5	214.56	-1574
393.54	219.33	-1570
297.83	208.81	-1570
268.13	176.73	-1572
161.9	159.52	-1568
122.45	110.41	-1564
343.14	148.07	-1552
207.71	189.45	-1548
279.41	226.55	-1536
335.84	129.53	-1576
183.56	43.29	-1538
234.86	96.77	-1546
-115.33	37.17	-1548
310.34	77.17	-1554
295.5	-108.88	-1578
555.44	-57.23	-1578
338.06	35.47	-1538
586.43	-30.09	-1550
495.28	89.39	-1548
419.28	70.01	-1552
463.42	22.29	-1556
384.85	-34.45	-1556
340.58	41.86	-1550
346.05	-11.88	-1548
520.21	-49.39	-1548
486.63	88.99	-1566
507.54	84.22	-1570
551.84	87.32	-1570
519.69	-14.58	-1574
345.65	-223.96	-1534
430.19	-292.69	-1548
484.19	-301.43	-1554
118.93	224.34	-1114
-341.49	-314.41	-1122
-263.63	-248.46	-1122
241.58	61.79	-1126
-60.23	-149.4	-1132
84.17	28.48	-1132
115.66	18.22	-1132
171.41	248.08	-1126
230.69	111.58	-1120
300.56	173.43	-1120
428.84	52.74	-1110
595.89	31.9	-1120
570.2	81.41	-1126
621.25	-53.83	-1138
452.62	135.66	-1126
522.24	241.17	-1112
469.16	232.15	-1126
484.78	164.2	-1128
375.99	274.14	-1136
411.39	14.44	-1132
382.33	227.69	-1126
392.05	178.36	-1120
401.84	153.06	-1126
508.42	-12.37	-1142
412.38	287.03	-1122
188.23	323.85	-1120
166.03	369.78	-1116
395.31	358.17	-1132
206.73	242.08	-1134
552.25	121.2	-1134
419.26	84.28	-1136
230.7	135.78	-1134
442.04	11.12	-1144
379.09	123.05	-1146
205.22	400.28	-1146
386.94	223.52	-1154
261.32	196.2	-1154
282.87	328.44	-1164
99.9	237.61	-1170
510.64	-29.59	-1164
379.64	-179.39	-1146
-304.55	-260.56	-1164
-151.71	-159.97	-1164
-172.4	-124.69	-1164
-267.7	-89.94	-1164
-390.15	-23.32	-1172
-214.52	-168.71	-1174
-228.8	-80.75	-1182
-97.26	-77	-1184
-240.84	-157.01	-1192
90.87	-11.23	-1188
423.55	199.19	-1154
441.98	300.97	-1154
512.23	212.78	-1154
388.45	169.64	-1152
346.16	176.52	-1156
332.09	194.79	-1154
526.95	166.64	-1160
162.71	209.83	-1162
96.7	223.2	-1162
348.57	194.2	-1162
215.84	275.75	-1158
364.49	221.14	-1158
387.6	124.7	-1162
367.98	186.57	-1162
285.36	186.3	-1168
268.84	177.66	-1168
155.68	125.27	-1172
291.84	117.75	-1172
367.43	271.6	-1168
176.08	286.49	-1170
360.45	189.54	-1170
410.79	120.2	-1170
449.4	172.68	-1168
426.96	170.28	-1178
355.91	163.85	-1182
332.43	148.03	-1180
380.66	161.54	-1176
352.38	114.29	-1176
289.71	80.27	-1172
230.96	254.91	-1176
212.83	143.99	-1176
231.14	264.9	-1174
228.46	237.57	-1180
301.56	130.62	-1182
172.55	144.66	-1182
79.75	46.24	-1172
691.47	-70.56	-1152
584.17	-20.71	-1156
408.29	76.57	-1156
335.68	-24.07	-1162
309.3	34.12	-1164
510.27	3.88	-1164
513.71	-14.03	-1166
664.33	125.69	-1164
618.8	25.23	-1162
387.32	-48.87	-1166
589.07	-68.85	-1172
286.56	-3.85	-1172
215.14	-1.8	-1174
211	-70.28	-1174
448.04	-112.83	-1180
286.61	-7.34	-1180
356.09	25.97	-1184
370.32	77.87	-1184
395.43	72.28	-1182
461.03	97.13	-1180
221.11	-39.16	-1186
592.42	-109.52	-1186
476.62	-138.06	-1186
495.58	-327.86	-1186
-12.5449	91.1703	-1598.61
150.859	33.0431	-1598.61
535.386	7.40722	-1598.61
447.824	-131.206	-1590.27
63.9323	199.483	-1514.01
99.6164	131.193	-1513.2
-139.74	-166.56	-1510.18
149.299	290.562	-1513.1
159.599	75.108	-1512.74
289.9	68.4438	-1510.59
452.199	-142.371	-1511.62
466.456	-114.891	-1511.35
-303.078	360.496	-1438.61
-154.296	-127.496	-1432.87
-306.861	-286.958	-1432.2
-147.833	-202.146	-1432.4
177.298	123.823	-1436
196.487	117.078	-1436.1
433.923	-301.614	-1427.01
-271.453	-63.9956	-1353.65
-253.792	-52.5366	-1353.84
-204.728	-58.1193	-1352.4
311.059	354.009	-1352.62
335.511	145.492	-1351.61
150.333	147.921	-1353.73
474.93	-267.622	-1350.35
-98.6926	-164.031	-1348.43
404.045	316.406	-1278.61
187.053	146.321	-1275
243.678	57.952	-1278.61
299.246	-143.907	-1278.61
425.758	115.546	-1273.61
417.761	-205.24	-1278.61
414.017	-394.953	-1275.15
538.93	76.0588	-1278.61
500.82	-254.478	-1276.09
-344.765	-165.235	-1198.61
-419.088	-322.759	-1192.03
-279.11	-300.946	-1194.04
-207.009	-245.911	-1192.99
107.763	111.056	-1196.67
74.3784	-330.885	-1191.04
178.114	414.898	-1198.61
212.899	410.288	-1198.61
262.793	186.748	-1198.61
283.653	210.61	-1196.71
329.34	165.42	-1193.23
357.453	132.764	-1198.61
453.998	25.1089	-1196.46
468.988	81.2835	-1192.73
493.596	81.5395	-1194.11
579.903	-204.203	-1198.61
598.51	-184.18	-1198.61
638.147	-212.559	-1198.61
658.537	-348.373	-1197.08
125.178	437.812	-1109.09
276.927	306.426	-1112.73
273.677	35.4891	-1118.61
293.557	-66.3963	-1117
290.63	-86.823	-1113.41
306.238	-103.074	-1112.95
315.216	48.3659	-1113.9
321.162	-66.3083	-1113.97
333.394	-66.0513	-1112.86
238.538	146.931	-1110.17
408.552	-154.912	-1115.07
-240.145	-239.827	-1108.09
30.9655	113.479	-1101.93
55.2452	64.5228	-1101.93
253.236	261.727	-1106.91
286.224	209.048	-1035.51
402.385	296.797	-1033.68
310.264	208.394	-1030.13
227.273	196.182	-1033.19
240.081	172.457	-1033.11
310.366	171.158	-1031.83
279.184	44.4087	-1031.09
342.563	44.1446	-1030.29
455.354	-391.367	-1030.48
505.661	-36.18	-1032.08
535.918	-317.71	-1029.28
-442.602	118.995	-1024.72
203.342	7.39179	-1027.7
289.083	-337.692	-1023.38
400.433	-450.411	-1024.75
504.632	-357.583	-1024.47
648.033	-240.855	-1025.44
-213.683	-39.8451	-958.61
-164.073	-41.9994	-958.61
-212.515	-8.51593	-949.591
317.358	270.18	-955.401
240.658	123.563	-956.723
187.971	81.3033	-954.355
396.836	207.529	-952.794
227.377	71.9815	-950.903
262.98	-379.79	-952.383
323.484	-403.011	-952.882
355.895	-276.124	-953.089
163.289	281.334	-947.946
327.9	389.461	-947.609
-172.283	6.57819	-878.61
-6.99492	-68.6109	-872.979
-240.869	-281.94	-878.61
-188.802	-175.001	-878.61
-238.423	-197.254	-872.782
-154.419	-251.753	-871.834
371.651	323.675	-878.61
289.047	346.475	-869.797
347.773	84.3594	-878.61
307.341	180.178	-874.601
259.094	49.628	-872.786
356.391	-42.3117	-872.817
356.789	-7.10841	-871.024
345.451	-377.636	-873.736
502.293	79.4027	-878.61
444.225	69.7202	-876.61
445.004	-235.23	-878.61
555.656	-206.862	-878.61
603.669	-387.579	-878.61
615.494	-149.302	-878.61
428.017	-224.033	-876.477
495.92	-310.818	-874.703
430.693	-323.95	-871.486
568.801	-280.264	-869.512
600.316	-280.087	-871.389
275.905	92.6367	-1599.12
413.487	-135.221	-1578.57
-160.371	-139.061	-1582.91
-218.087	-93.6946	-1596.01
-335.141	-242.433	-1584.91
514.982	-259.358	-1570.58
152.48	331.008	-1515.83
151.438	226.892	-1515.83
307.755	97.8999	-1510.27
66.9457	50.6012	-1518.61
461.935	22.2962	-1510.27
-248.419	-224.938	-1430.27
410.765	217.724	-1433.05
266.227	206.078	-1430.27
78.4279	64.6858	-1438.61
129.81	7.09383	-1427.49
502.869	-185.149	-1427.49
-313.132	-192.768	-1344.71
130.569	238	-1350.27
158.097	199.411	-1344.71
143.335	314.459	-1350.27
377.178	-37.6039	-1344.71
439.327	-161.513	-1344.71
289.936	246.023	-1347.49
452.561	166.286	-1350.27
418.028	79.7046	-1347.49
220.955	82.4773	-1355.83
239.42	203.737	-1353.05
152.37	61.252	-1358.61
-410.037	341.444	-1350.27
507.351	-209.577	-1350.27
476.964	-381.22	-1347.49
-475.221	193.456	-1273.05
225.389	309.177	-1275.83
208.765	99.1137	-1275.83
201.122	137.554	-1270.27
255.459	232.367	-1273.05
335.071	164.462	-1275.83
455.437	80.0753	-1270.27
380.71	-219.058	-1270.27
350.465	-369.413	-1273.05
388.841	168.053	-1275.83
-331.062	-280.519	-1195.83
-273.647	-244.851	-1198.61
163.852	155.333	-1195.83
212.992	147.445	-1198.61
252.135	145.757	-1195.83
341.065	234.755	-1195.83
179.247	240.927	-1187.49
159.501	270.394	-1193.05
125.713	344.959	-1195.83
216.618	59.4208	-1193.05
308.242	-0.306625	-1195.83
271.245	-9.83327	-1198.61
377.866	-14.9703	-1190.27
510.528	25.5214	-1187.49
546.698	226.454	-1190.27
357.368	-38.0291	-1195.83
338.217	206.751	-1113.05
181.377	242.866	-1115.83
254.71	160.889	-1115.83
323.316	95.0477	-1115.83
451.417	33.1413	-1110.27
557.175	-2.57681	-1110.27
-393.525	196.896	-1113.05
571.073	-168.963	-1113.05
129.47	317.031	-1118.61
223.659	308.355	-1113.05
236.417	315.001	-1113.05
254.821	-162.119	-1115.83
329.152	-379.121	-1115.83
566.227	-139.769	-1113.05
522.89	-146.441	-1107.49
599.515	-362.36	-1104.71
-418.141	378.787	-1038.61
-215.028	-244.109	-1033.05
-99.8163	-214.843	-1027.49
-1.01877	-81.8278	-1033.05
364.767	-227.95	-1027.49
374.194	-311.384	-1033.05
503.649	-239.994	-1030.27
446.638	-49.1191	-1030.27
374.149	-102.976	-1033.05
382.393	-148.198	-1035.83
577.567	-103.34	-1035.83
380.811	-25.3175	-1030.27
376.09	-48.1273	-1033.05
319.13	72.062	-1030.27
332.556	15.9548	-1035.83
293.264	57.3144	-1030.27
179.397	37.1683	-1035.83
449.887	137.514	-1027.49
413.227	233.456	-1030.27
330.953	223.687	-1033.05
291.634	335.384	-1027.49
176.362	298.147	-1033.05
133.698	284.918	-1027.49
-193.39	-36.5846	-950.27
-6.82013	-115.418	-950.27
7.15086	-119.812	-950.27
438.875	-214.57	-953.05
530.638	-214.484	-947.49
401.062	-123.529	-953.05
332.113	-113.876	-955.83
350.873	2.47794	-953.05
436.64	-33.9855	-955.83
511.174	87.7683	-953.05
585.258	95.4276	-953.05
308.641	118.498	-955.83
235.363	33.9254	-953.05
254.147	156.03	-955.83
274.92	173.612	-953.05
175.127	217.456	-953.05
252.88	303.275	-953.05
375.372	-416.888	-953.05
60.4243	48.6137	-955.83
241.611	267.093	-867.49
232.098	167.95	-873.05
248.255	108.547	-873.05
177.678	101.836	-873.05
127.837	263.32	-873.05
-253.542	-93.6977	-870.27
-229.999	-179.314	-870.27
-104.724	-163.346	-873.05
-214.583	-233.183	-873.05
-394.652	-164.143	-875.83
426.012	-231.988	-873.05
447.2	-199.166	-867.49
473.405	-56.4028	-870.27
584.81	11.7219	-870.27
453.422	-345.611	-867.49
403.855	-404.371	-870.27
403.532	-14.4326	-873.05
-130.9	138.168	-873.05
-201.013	10.0954	-870.27
39.4886	0.650584	-870.27
332.428	-119.414	-873.05
256.022	230.515	-870.27
-5.59137	132.004	-875.83
564.975	-307.7	-1598.38
499.095	-391.779	-1598.38
463.938	-389.133	-1598.38
395.963	-201.011	-1598.38
392.352	-161.429	-1598.38
631.991	94.6348	-1598.38
525.558	-64.7712	-1598.38
434.755	121.879	-1598.38
398.616	23.8262	-1598.38
382.108	113.473	-1598.38
365.604	93.5279	-1598.38
360.614	36.0815	-1598.38
519.704	305.25	-1598.38
435.865	408.501	-1598.38
429.786	343.915	-1598.38
413.263	204.013	-1598.38
387.453	433.384	-1598.38
367.021	467.823	-1598.38
370.438	258.988	-1598.38
349.527	304.51	-1598.38
348.807	288.064	-1598.38
346.353	326.307	-1598.38
318.534	263.427	-1598.38
313.101	331.431	-1598.38
346.797	545.294	-1598.38
290.235	-227.987	-1598.38
167.729	-283.162	-1598.38
108.621	-169.375	-1598.38
291.879	132.795	-1598.38
278.672	-58.5183	-1598.38
266.347	157.1	-1598.38
246.661	102.882	-1598.38
227.891	53.9832	-1598.38
193.251	155.714	-1598.38
152.051	15.4891	-1598.38
108.577	63.5122	-1598.38
59.2647	15.1923	-1598.38
12.6327	-116.097	-1598.38
293.457	306.456	-1598.38
282.646	202.586	-1598.38
253.394	413.916	-1598.38
241.847	266.412	-1598.38
201.875	280.055	-1598.38
166.772	178.059	-1598.38
150.236	329.815	-1598.38
128.308	278.752	-1598.38
96.7676	278.02	-1598.38
64.9291	160.816	-1598.38
-118.703	-220.56	-1598.38
-214.176	-290.696	-1598.38
-217.639	-268.241	-1598.38
-249.392	-302.182	-1598.38
-186.068	-181.532	-1598.38
-236.601	-174.072	-1598.38
-252.326	-80.0421	-1598.38
-119.39	144.111	-1598.38
-232.592	401.913	-1598.38
-324.547	-232.363	-1598.38
-381.172	103.587	-1598.38
-490.421	-89.8098	-1598.38
-463.257	181.034	-1598.38
727.236	-241.66	-1518.38
598.701	-374.532	-1518.38
414.903	-252.503	-1518.38
373.612	-279.79	-1518.38
344.858	-396.709	-1518.38
340.009	-236.321	-1518.38
553.256	60.6068	-1518.38
438.959	-75.6109	-1518.38
411.102	13.5192	-1518.38
346.192	101.566	-1518.38
334.037	-34.6673	-1518.38
312.098	36.6537	-1518.38
422.989	124.213	-1518.38
411.674	241.922	-1518.38
382.111	251.692	-1518.38
359.862	128.087	-1518.38
337.165	287.312	-1518.38
330.368	171.963	-1518.38
324.306	190.815	-1518.38
283.642	102.83	-1518.38
280.029	-11.0523	-1518.38
206.699	99.1077	-1518.38
196.262	88.0528	-1518.38
120.192	-202.287	-1518.38
82.5237	13.2743	-1518.38
60.8132	-0.339366	-1518.38
52.7894	9.41981	-1518.38
-4.59068	-85.5055	-1518.38
305.146	239.474	-1518.38
286.796	252.828	-1518.38
285.613	323.592	-1518.38
284.298	180.263	-1518.38
253.561	314.311	-1518.38
248.006	224.675	-1518.38
210.699	222.799	-1518.38
205.883	248.596	-1518.38
194.67	221.321	-1518.38
149.743	180.798	-1518.38
146.013	109.456	-1518.38
92.1205	281.86	-1518.38
-156.109	-226.671	-1518.38
-170.946	-243.278	-1518.38
-71.4293	-126.586	-1518.38
-81.399	-202.783	-1518.38
-115.088	-114.998	-1518.38
-115.13	-87.8353	-1518.38
-129.022	-58.2724	-1518.38
-157.859	-152.318	-1518.38
-200.927	-55.0245	-1518.38
-219.254	-110.259	-1518.38
-243.561	-135.703	-1518.38
-260.211	-218.245	-1518.38
-330.701	-123.948	-1518.38
-263.324	268.763	-1518.38
-328.936	350.304	-1518.38
-385.439	128.63	-1518.38
331.908	43.6396	-1434.4
433.001	57.7831	-1430.72
446.114	417.624	-1438.38
325.577	364.566	-1438.38
573.664	349.531	-1435.13
440.617	312.925	-1435.88
367.509	315.734	-1434.58
330.812	310.327	-1434.34
325.501	289.415	-1434.28
567.326	336.109	-1431.73
407.549	336.427	-1429.44
393.181	335.898	-1428.44
364.528	272.94	-1429.68
357.978	216.391	-1429.63
62.6483	-131.56	-1433.5
257.721	78.62	-1433.96
161.671	113.319	-1434.51
119.571	148.52	-1434.99
247.269	153.835	-1432.99
220.298	181.516	-1430.8
184.044	178.293	-1428.68
60.4084	-3.30133	-1428.8
54.8213	-37.2019	-1429.32
22.3208	62.2981	-1428.85
4.0854	83.9123	-1429.77
276.987	363.801	-1438.38
270.431	320.882	-1438.38
271.943	282.283	-1433.7
144.86	368.751	-1433.92
301.597	232.167	-1433.12
208.232	269.623	-1429
183.208	250.365	-1428.25
131.065	269.567	-1430.2
-68.6749	-194.606	-1435.57
-148.976	-226.353	-1434.09
-189.764	-235.227	-1433.46
-227.12	-194.041	-1433.03
-141.192	-242.028	-1428.87
-265.529	-158.14	-1427.53
-42.0522	-86.8147	-1433.56
-134.599	-18.8853	-1435.19
-192.467	-101.54	-1431.68
-198.28	-63.7362	-1433.27
-90.3887	282.835	-1438.38
-426.422	296.694	-1434.57
-389.605	290.941	-1430.7
-457.998	244.969	-1428.26
615.065	100.048	-1355.24
778.345	-73.6651	-1348.19
410.483	-343.821	-1356.31
578.611	21.3904	-1358.38
454.596	-25.6927	-1358.38
400.333	-33.8438	-1358.38
376.005	54.6658	-1358.38
596.143	270.47	-1358.38
398.402	242.228	-1358.38
383.504	257.099	-1358.38
360.131	251.677	-1358.38
358.651	318.051	-1358.38
344.941	167.492	-1358.38
343.313	249.826	-1358.38
342.227	261.906	-1358.38
478.423	262.527	-1349.1
362.367	215.642	-1349.2
216.849	93.0864	-1358.38
105.215	107.044	-1358.38
196.624	115.126	-1355.07
107.405	87.446	-1354.98
111.573	34.7807	-1352.64
227.887	88.4027	-1348.86
248.878	245.48	-1358.38
235.521	163.875	-1358.38
219.368	301.085	-1358.38
197.215	361.61	-1358.38
195.355	142.684	-1358.38
175.131	223.484	-1358.38
92.5753	247.562	-1358.38
-258.391	-237.558	-1358.38
-323.465	-264.547	-1356.27
-198.937	-222.782	-1351.13
-201.791	-290.479	-1348.96
-280.943	-279.713	-1349.06
-239.863	-98.5397	-1358.38
-98.3767	43.124	-1353.77
-450.033	-4.41637	-1358.38
-485.858	-6.45018	-1356.39
440.185	-284.191	-1274.13
472.023	-247.029	-1271.47
454.142	-325.151	-1269.98
493.881	65.0667	-1274.72
458.681	-68.8396	-1274.52
547.613	156.786	-1271.39
398.406	-47.7896	-1271.43
445.066	299.791	-1278.38
372.516	362.763	-1278.38
374.796	204.941	-1278.38
633.428	190.051	-1276.11
397.083	311.873	-1275.75
357.69	205.523	-1275.12
536.75	218.363	-1268.69
372.019	280.801	-1269.52
49.0076	22.6332	-1274.3
356.818	53.2422	-1268.57
312.001	362.224	-1278.38
274.849	207.325	-1278.38
222.343	347.727	-1278.38
197.924	343.696	-1278.38
175.634	252.997	-1278.38
337.468	260.1	-1275.71
298.505	169.196	-1274.81
260.888	230.539	-1275.24
241.505	190.212	-1272.27
139.039	368.894	-1270.59
275.182	184.465	-1269.76
147.571	404.759	-1267.84
-87.1717	-183.736	-1273.95
-127.54	-182.566	-1276.36
-153.761	-195.348	-1268.07
-48.0657	-9.06466	-1272.72
-157.328	9.96396	-1272.82
-210.153	-37.588	-1267.76
-219.376	-153.609	-1268.47
-284.129	-336.002	-1272.63
-414.823	505.701	-1274.16
444.937	-235.705	-1264.57
424.239	-305.754	-1265.86
483.727	-114.252	-1263.92
223.678	408.594	-1265.39
45.3952	-90.2411	-1265.38
-36.8471	-36.5357	-1266.94
-157.788	-152.152	-1264.05
-562.074	349.834	-1264.85
581.537	-369.746	-1198.38
570.856	-307.613	-1193.86
454.611	-338.593	-1193.82
471.546	-301.308	-1189.8
455.226	63.6096	-1198.38
419.77	-29.6876	-1198.38
374.827	163.293	-1198.38
507.668	164.213	-1194.76
565.573	111.427	-1190.8
368.551	-26.7397	-1190.44
344.938	51.5848	-1190.49
328.122	24.4818	-1191.82
325.146	49.3116	-1190.75
426.402	159.617	-1189.1
467.609	361.73	-1198.38
437.759	437.554	-1198.38
422.991	213.855	-1198.38
401.073	370.029	-1198.38
352.7	439.875	-1198.38
346.125	418.204	-1198.38
362.289	279.045	-1194.07
336.965	263.891	-1196.15
140.22	-174.68	-1194.24
253.195	55.1428	-1198.38
198.846	126.111	-1198.38
63.9563	110.388	-1198.38
-23.8546	45.2618	-1198.38
98.8597	102.592	-1193.12
264.052	363.81	-1198.38
240.683	185.191	-1198.38
201.428	206.049	-1198.38
187.801	312.221	-1198.38
173.332	245.898	-1198.38
134.012	316.221	-1198.38
129.162	237.546	-1198.38
124.985	186.57	-1198.38
72.0768	280.955	-1196.21
213.072	167.319	-1190.6
198.821	355.185	-1191.76
-151.501	-185.246	-1198.38
-170.998	-189.476	-1198.38
-225.294	-236.932	-1198.38
-238.169	-247.291	-1198.38
-242.054	-185.214	-1198.38
-255.61	-243.322	-1198.38
-303.59	-255.808	-1194.5
-105.421	-184.601	-1192.04
-47.9103	42.7222	-1198.38
-120.454	-96.6111	-1198.38
-141.377	-56.8369	-1198.38
-47.3622	-1.72712	-1195.87
-104.897	31.8588	-1193.33
-282.333	-100.52	-1192.05
-317.571	-155.46	-1190.82
-193.462	-158.716	-1189.81
-334.766	409.735	-1198.38
-357.85	413.414	-1198.38
-337.21	442.844	-1187.65
-381.886	427.757	-1198.38
-389.646	444.059	-1198.38
-380.72	385.963	-1196.46
753.9	-318.127	-1108.44
659.293	-131.949	-1113.97
399.941	-314.273	-1114.39
600.139	-210.017	-1110.57
426.796	-405.298	-1112.18
489.994	-240.214	-1108.48
622.227	24.428	-1115.27
608.098	14.3576	-1114.66
604.752	60.7206	-1112.31
475.914	-82.4915	-1113.22
465.867	-72.9308	-1111.14
350.197	-26.4351	-1111.53
335.89	72.2549	-1110.38
536.575	-133.788	-1110.21
466.305	317.011	-1114.06
377.331	361.988	-1113.53
419.631	354.336	-1112.18
333.095	317.693	-1111.4
614.36	142.503	-1109.92
561.63	378.184	-1108.71
418.171	166.572	-1109.32
308.909	-264.071	-1116.7
236.563	-224.534	-1107.5
306.294	28.2742	-1111.87
269.984	258.802	-1116.44
236.661	308.578	-1116.23
221.549	228.493	-1115
177.77	156.309	-1115.19
281.863	292.838	-1113.37
146.626	285.471	-1112.63
-324.572	-247.954	-1115.81
-170.76	-337.592	-1110.81
-232.799	-312.848	-1113.03
-294.818	-259.819	-1111.86
-257.455	-442.489	-1108.6
-273.155	-237.622	-1109.48
-248.813	-54.4708	-1113.52
-203.75	70.9377	-1112.12
-304.288	-18.5138	-1108.4
-117.681	266.591	-1118.38
-339.049	-238.776	-1114.66
-480.851	-483.169	-1109.04
729.409	-404.509	-1038.38
481.769	-225.928	-1038.38
568.683	-254.237	-1032.97
524.22	-431.295	-1028.96
386.051	-487.643	-1029.22
504.171	-196.67	-1038.38
454.906	-13.1725	-1038.38
394.042	118.481	-1038.38
338.85	-8.93476	-1036.71
321.742	92.6209	-1028.71
604.155	182.706	-1038.38
486.941	215.744	-1038.38
430.663	214.203	-1038.38
426.995	150.443	-1038.38
405.311	246	-1038.38
382.795	246.511	-1036.36
432.565	131.569	-1032.03
274.269	-418.176	-1032.1
300.418	75.7002	-1038.38
266.04	113.07	-1038.38
193.07	76.3414	-1038.38
122.687	31.4683	-1038.38
49.5801	-20.4742	-1038.38
255.688	119.055	-1032.88
206.713	49.1681	-1033.27
272.139	33.8941	-1028.11
260.905	50.6459	-1028.51
108.113	-18.6619	-1027.67
18.917	-91.1179	-1028.93
310.874	238.005	-1038.38
181.758	121.867	-1038.38
193.691	253.163	-1029.23
164.196	223.747	-1029.71
-227.939	-252.231	-1038.38
-239.185	-437.102	-1034.32
-206.035	-217.348	-1032.92
-134.565	-254.755	-1029.44
-26.0749	-107.723	-1038.38
-53.8583	0.919678	-1038.38
-67.4997	-114.432	-1038.38
-82.1431	-195.881	-1038.38
-152.391	-180.588	-1038.38
-66.795	-101.383	-1034.24
-91.9574	5.36575	-1033.93
-380.811	-35.248	-1038.38
-399.249	-104.92	-1033
-372.141	257.436	-1036.4
622.795	-27.4851	-951.696
523.427	-397.454	-958.38
497.993	-394.619	-958.38
421.625	-281.532	-958.38
476.222	-439.269	-953.708
393.689	-297.816	-954.518
520.275	-79.0162	-958.38
423.06	-11.3952	-958.38
394.167	18.6049	-958.38
333.013	0.217506	-958.38
484.387	-217.94	-956.193
322.615	-19.3568	-955.644
507.92	206.445	-958.38
419.255	228.515	-958.38
406.097	217.012	-958.38
393.718	93.1897	-958.38
287.536	244.887	-958.38
270.475	98.0487	-958.38
476.933	354.482	-954.72
445.458	205.98	-955.323
426.84	185.39	-955.07
299.145	194.41	-955.488
282.094	77.3741	-956.081
469.441	317.567	-951.942
351.567	124.372	-952.496
220.426	14.9257	-958.38
14.3874	-101.512	-953.683
97.1154	3.72063	-951.1
218.396	251.016	-958.38
197.409	248.796	-958.38
192.391	154.259	-958.38
152.55	135.206	-958.38
141.833	294.574	-958.38
163.634	277.602	-955.008
158.541	196.522	-956.007
130.355	215.795	-956.489
248.019	99.2241	-951.788
212.398	185.784	-951.379
46.8046	170.235	-950.565
-192.939	-279.427	-958.38
-249.936	-295.872	-958.38
-251.658	-436.038	-952.276
-127.046	-142.346	-958.38
-169.033	-140.425	-958.38
-181.573	-29.7395	-958.38
-191.668	-30.6438	-958.38
-317.123	-202.13	-958.38
-77.0534	-181.856	-954.036
-142.185	-198.877	-955.947
-231.78	-144.373	-952.622
-291.982	110.137	-951.924
-388.02	-61.1713	-958.38
-420.499	282.523	-958.38
458.591	-243.13	-878.38
475.359	-406.54	-878.38
443.497	-317.485	-878.38
472.935	-304.284	-875.149
533.181	-342.389	-872.359
499.884	-310.691	-873.041
388.172	-282.329	-870.319
503.324	-1.39845	-878.38
391.205	-32.1779	-878.38
321.63	16.8466	-878.38
297.938	134.478	-878.38
537.854	46.9413	-871.312
322.79	110.146	-872.41
423.86	53.1547	-869.524
379.187	-25.0168	-869.207
544.177	186.77	-878.38
497.056	420.268	-878.38
519.026	201.58	-878.38
516.52	220.762	-878.38
489.777	192.164	-878.38
438.037	449.694	-878.38
453.928	209.258	-878.38
443.362	281.071	-878.38
425.973	317.807	-878.38
411.126	218.293	-878.38
395.665	274.67	-878.38
315.875	403.646	-878.38
313.225	243.507	-878.38
245.078	-215.893	-873.937
285.631	64.2581	-878.38
105.215	113.138	-871.761
165.794	78.9554	-870.058
259.684	209.203	-878.38
194.168	410.4	-878.38
151.298	327.284	-878.38
215.254	360.96	-875.825
187.123	327.388	-874.799
102.422	314.661	-875.419
-121.241	-261.088	-878.38
-77.5517	-33.6999	-878.38
-107.167	-201.877	-878.38
-139.604	-73.301	-878.38
-146.434	-219.41	-878.38
-179.22	13.1161	-878.38
-178.701	-177.741	-878.38
-187.826	-169.474	-878.38
-114.557	-190.788	-874.356
-105.188	-137.87	-870.47
-130.069	-43.8932	-873.462
-206.393	249.299	-878.38
-343.044	300.018	-878.38
-328.425	-261.481	-878.38
-469.363	192.718	-878.38
-497.421	350.684	-878.38
-514.715	353.288	-878.38
