# Supplementary material for: Spinal premotor interneurons controlling antagonistic muscles are spatially intermingled
Source: eLife. 2022 Dec 13;11:e81976. doi: 10.7554/eLife.81976 (PMC9844990; doi:10.7554/eLife.81976)
Supplement: Figure 3—figure supplement 2—source data 4. [file elife-81976-fig3-figsupp2-data4.xlsx]

## Sheet: Sheet1
-188.7	-148.06	-698
-112.27	-207.27	-704
-212.5	-197.02	-724
420.21	252.27	-690
443.04	216.97	-690
493.13	193.75	-694
260.41	147.72	-700
499.82	81.69	-702
348.52	164.16	-704
347.68	114.4	-706
445.55	225.58	-706
378.75	26.83	-708
371.2	87.76	-708
252.51	54.3	-712
240.78	95.25	-708
354.88	198.24	-710
390.48	197.32	-722
388.82	133.43	-722
247.63	130.24	-722
222.04	59.2	-724
589.65	93.98	-728
409.25	269.9	-726
595.77	12.99	-736
559.72	-2.01	-702
524.99	-133.99	-694
593.82	-184.73	-728
518.9	-318.16	-714
353.01	-195.1	-714
650.1	-381.94	-710
556.27	-177.22	-710
-213.75	-204.85	-480
175.42	291.93	-446
563.08	177.21	-446
564.64	39.03	-448
381.08	24.18	-450
516.25	256.99	-452
378.53	280.37	-456
313.09	174.21	-454
301.4	72.39	-456
3.67	80.55	-452
237.43	23.71	-456
302.22	336.66	-470
469.02	331.26	-470
547.81	317.79	-470
595.03	65.23	-470
576.98	121.38	-474
530.93	117.85	-478
481.02	202.71	-476
484.37	182.34	-480
392.39	205.11	-480
176.72	262.7	-480
193.98	205.22	-480
198.91	131.32	-478
383.09	173.19	-478
252.63	88.49	-474
313.41	47.22	-460
456.9	101.82	-462
265.39	101.42	-460
443.11	-47.02	-476
208.3	-293.9	-448
451.57	-381.59	-448
515.26	-462.68	-450
509.33	-166.21	-446
625.19	-227.75	-448
655.94	-256.78	-446
418.66	-88.14	-452
153.27	-80.76	-470
504.01	-185.33	-476
473.82	-156.33	-480
130.94	124.02	-208
-24.28	38.79	-222
209.8	35.9	-226
211.02	63.45	-236
-94.57	-142.77	-242
181.53	278.04	-250
262.32	269.66	-246
432.1	188.05	-242
481.99	210.09	-234
525.44	254.89	-230
393.48	113.42	-226
461.57	204.63	-220
216.95	247.32	-220
73.79	228.04	-222
448.73	159.32	-214
586.34	140.38	-216
614.35	117.71	-210
188.17	149.71	-212
254.12	248.64	-214
581.92	296.55	-242
324.21	11.61	-214
286.1	26.59	-218
377.09	63.12	-216
346.6	46.8	-220
480.5	-41.99	-222
384.56	-142.89	-224
382.82	39.9	-228
506.15	68.41	-230
611.99	-20.94	-240
462.34	-43.5	-242
506.57	-150.44	-240
400.84	-218.33	-236
449.54	14.55	-240
344.25	37.13	-242
483.16	71.96	-244
280.16	48.31	-242
577.44	71.61	-208
416.62	-53.3	-214
386.13	4.54	-222
550.49	-421.85	-228
486.19	-464.35	-228
343.36	-345.78	-212
-271.15	-43.9	-4
-101.07	-90.6	-690
-285.21	-110.47	-690
-123.56	-102.87	-706
193.18	161.74	-690
338.59	180.2	-696
501.95	126.16	-702
376.76	148.59	-702
487.51	157.75	-704
437.96	209.99	-700
152.57	352.05	-710
203.88	294.12	-712
436.64	275.68	-708
370.85	185.74	-716
397.91	164.94	-716
360.13	227.46	-720
669.54	183.42	-712
322.82	49.68	-702
279.72	30.65	-720
383.23	-174.27	-720
403.5	33.65	-722
464.08	63.97	-706
452.04	74.72	-712
509.53	-387.22	-688
377.85	-297	-688
556.51	-405.56	-720
713.8	-309.88	-714
584.19	-144.77	-698
404.33	-354.05	-700
644.07	-48.32	-716
-261.74	-250.45	-690
565.24	-14.55	-710
82.99	30.26	-470
182.31	60.71	-484
107.46	45.46	-462
380.32	194.34	-450
237.12	257.47	-460
634.47	206.8	-462
530.39	255.33	-466
636.4	221.46	-478
366.28	10.9	-452
512.94	30.76	-454
536.03	-24.51	-456
564.63	94.33	-456
300.86	-6.36	-462
440.98	10.72	-468
727.89	20.43	-470
347.84	58.82	-480
417.98	151.32	-482
462.66	140.85	-482
633.66	158.21	-480
548.15	139.18	-466
432.58	179.04	-468
649.73	-397.5	-470
461.71	-293.08	-476
683.43	-184.85	-480
-113.47	-125.4	-260
282.08	109.49	-226
373.7	92.04	-234
473.93	131.3	-240
277.64	120.25	-240
264.14	120.32	-242
138.32	276.38	-242
247.89	122.48	-250
546.13	300.84	-252
491.03	222.23	-254
157.44	229.21	-258
209.53	196.75	-264
406.2	150.36	-264
304.84	159.21	-260
121.75	92.01	-260
430.13	160.26	-258
227.5	45.24	-246
266.83	13.87	-244
199.53	-61	-242
416.67	-49	-238
137.55	4.62	-236
173.09	-31.04	-232
342.48	43.28	-222
292.23	-8.03	-222
581.86	80.66	-220
440.97	-283.04	-232
447.12	-331.81	-226
409.97	-263.63	-224
338.35	-166.41	-210
677.41	-140.02	-230
309.3	32.71	-264
-292.26	-260.39	-2
-222.8	-276.49	-2
528.82	-332.09	-8
-549.54	407.28	-698
192.08	115.95	-694
-71.41	-136.74	-704
-125.69	-153.96	-704
-140.34	-199	-706
163.69	94.25	-704
86.87	106.56	-710
-279.72	-93.99	-716
-176.34	-155.09	-718
-117.28	-176.3	-718
145.08	127.04	-718
191.53	93.32	-718
287.69	-162.14	-718
-226.14	-264.21	-718
449.99	-306.26	-714
516.36	-236.73	-714
473.27	-192.77	-718
479.77	-171.03	-714
486.55	-66.22	-716
400.55	-237.02	-710
354.73	-177.45	-706
304.02	64.72	-698
264.27	148.52	-694
270.63	134.19	-700
292.16	114.14	-696
393.16	129.22	-696
390.18	149.94	-694
432.62	186.97	-694
199.29	126.22	-702
328.75	48.44	-716
278.18	24.8	-716
379.42	126.82	-716
409.75	74.84	-714
301.05	-6.61	-708
413.43	31.71	-716
453.42	75.39	-702
367.69	146.01	-706
416.22	126.17	-710
584.78	99	-690
497.25	161.58	-692
610.18	38.43	-698
659.63	46.44	-698
476.03	51.02	-698
568.13	43.31	-694
489.22	148.59	-704
528.33	27.98	-704
627.27	-26.16	-708
505.44	166.23	-708
641.98	11.17	-708
651.01	121.53	-712
593.63	74.16	-712
548.39	-16.78	-716
565.81	-6.01	-716
553.26	-0.48	-714
542.54	-252.1	-700
722.59	-228.99	-700
239.43	421.28	-692
426.85	251.3	-712
437.55	215.83	-706
440.37	254.95	-704
438.31	277.76	-700
344.1	275.45	-706
215.75	291.63	-702
183.21	201.62	-692
182.09	237.47	-716
167.73	260.7	-706
176.04	290.48	-694
170.35	194.22	-710
177.39	187.08	-718
119.31	241.29	-712
481.75	-396.52	-700
534.11	-429.58	-700
283.6	49.26	-450
389.91	128.01	-448
385.41	164.07	-450
431.15	156.28	-450
455.29	77.1	-446
478.47	85.83	-448
511.55	230.91	-450
484.45	166.05	-454
555.91	154.36	-456
434.44	124.84	-454
509.5	61.65	-454
392.46	42.79	-452
311.71	-8.75	-450
337.25	35.94	-452
254.8	98.34	-450
277.08	123.55	-450
283.71	88.05	-450
469.31	51.13	-446
361.95	140.45	-454
354.27	294.62	-454
548	345.71	-458
421.21	184.08	-458
257.92	202.51	-458
189.06	197.03	-460
237.27	62.21	-458
419.43	38.45	-460
469.85	131.83	-460
537.62	42.79	-460
240.55	241.29	-462
566.82	288.32	-466
595.16	281.68	-468
487.91	296.54	-470
451.72	247.55	-470
440.93	230.66	-472
345.05	193.4	-472
474.67	171.47	-472
444.02	153.57	-466
401.73	180.12	-466
386.45	215.26	-466
379.67	151.16	-466
592.66	72.02	-470
242.29	133.06	-470
254.68	197.49	-472
263.35	276.14	-474
335.27	21.74	-472
386.86	81.61	-472
478.76	76.03	-474
433.4	105.57	-474
457.78	150.33	-472
371.76	68.15	-468
330.46	77.86	-466
295.52	116.98	-466
404.04	59.51	-466
389.38	95.19	-466
469.58	196.74	-462
529.41	139.45	-474
203.6	285.12	-448
114.45	236.91	-458
123.13	248.68	-456
237.29	472.6	-462
123.95	212.71	-462
158.66	135.41	-472
142.63	106.79	-474
227.65	355.65	-466
155.69	145.03	-466
204.26	79.39	-474
254.54	-67.98	-470
-76.92	2.55	-466
313.07	-123.64	-464
378.84	-54.4	-466
-157.71	-0.04	-458
229.13	-12.52	-456
368.15	4.92	-454
113.08	41	-450
197.15	63.41	-450
136.79	54.27	-472
211.09	-15.58	-470
436.58	-94.43	-448
388.2	-149	-454
329.42	54.57	-468
608.28	-132.53	-452
418.67	-178.23	-452
639.43	-98.64	-454
555.92	-24.01	-456
489.81	-36.31	-456
466.36	-31.37	-458
357.49	-29.14	-462
635.63	40.1	-458
553.79	31.9	-468
518.28	-93.19	-466
491.82	-74.03	-470
468.93	-203.67	-474
736.72	-160.37	-454
565.45	-359.22	-452
557.5	-296.14	-454
412.31	-302.23	-456
494.98	-284.87	-460
575.69	-321.66	-456
432.66	-327.18	-462
498.89	-415.48	-464
593.63	-365.01	-472
672.92	-363.67	-470
655.27	-388.04	-470
421.15	-319.66	-474
-369.38	344.51	-458
-214.66	259.12	-458
-236.47	-224.17	-448
-115.29	-141.26	-452
-313.9	-202.15	-458
-126.66	-208.33	-458
-195.5	-151.13	-462
-148.32	-176.61	-466
-222.91	-184.12	-468
-203.93	-229.45	-468
-165.93	-137.62	-206
-109.83	-138.63	-206
-164.93	-113.93	-208
-168.15	-58.85	-208
-247.07	-139.3	-216
-184.37	-107.44	-216
-164.47	-213.23	-216
-203.96	-211.58	-220
-268.05	-158.87	-222
-112.25	-174.96	-224
-197.6	-52.54	-228
-79.31	-112.29	-230
-51.73	-120.16	-230
-132	-143.97	-232
-329.16	-220.51	-228
-42.62	-195.05	-202
88.45	7.44	-226
141.55	-4.35	-200
67.33	252.74	-200
87.6	154.68	-202
39.72	130.86	-206
70.11	111.37	-210
21.19	119.7	-216
274.28	256.46	-198
167.73	224.26	-200
247.16	238.92	-208
252.36	146.75	-208
310.28	167	-210
145.1	194.23	-210
175.59	248.49	-212
209.79	213.17	-216
129.28	222.81	-222
300.01	228.2	-222
179.12	168.91	-228
288.09	189.58	-228
332.55	153.37	-228
310.98	340.31	-226
334.96	250.02	-204
225.81	53.93	-204
215.56	87.21	-204
242.25	96.99	-204
269.22	77.79	-204
483.46	115.83	-204
440.77	302.32	-204
358.82	206.62	-212
162.34	238.6	-216
192.16	91.63	-216
-139.23	349.7	-218
219.79	533.38	-214
239.06	416.26	-218
68.8	404.29	-198
261.82	428.44	-196
388.5	-18.58	-198
311.09	107.99	-198
356.42	70.42	-200
344.25	12.09	-206
365.71	57.47	-208
324.33	-7.23	-210
227.45	-31.69	-212
212.38	54.05	-216
148.74	35.37	-220
180.14	71.97	-224
311.55	-84.03	-230
291.41	-37.5	-230
394.56	11.92	-230
321.54	36.78	-228
345.23	96.11	-228
278.89	-22.65	-220
384.54	-80.97	-232
248.16	-196.49	-234
317.02	-153.09	-234
480.77	-438.71	-244
412.93	-180.26	-240
478.7	-281.7	-238
481.59	-251.96	-232
479.95	-319.38	-230
523.28	-151.44	-208
430.28	-122.46	-208
424.47	-93.7	-208
706.06	-307.36	-208
655.73	-186.55	-232
635.33	-46.25	-228
599.51	-45.94	-220
551.1	-39.73	-214
509.83	-479.72	-226
546.75	-322.79	-244
686.78	-20.75	-202
503.92	-150.92	-214
601.82	-84.63	-196
413.68	-48.11	-200
434.36	-3.99	-208
419.75	-161.94	-244
555.4	69.65	-224
495.43	179.75	-188
493.74	198.56	-188
427.36	69.41	-190
590.23	60.96	-194
559.4	85.56	-194
573.05	111.62	-190
430.4	92.2	-190
384.08	110.22	-190
410.85	179.3	-206
443.65	149.48	-222
483.22	203.85	-206
591	170.03	-202
446.28	123.78	-198
438.76	10.24	-196
373.03	94.04	-210
408.59	-44.71	-212
396.19	231.28	-190
383.9	246.82	-192
442.14	188.26	-216
386.51	218.27	-212
427.12	256.52	-210
423.1	296.83	-208
-363.48	-138.19	-224
324.56	216.77	-204
309.51	212.11	-220
516.08	114.38	-236
440.57	-426.48	-618
81.95	67.7	-606
-520.24	312.67	-620
-206.2	-128.74	-614
-206.99	-175.24	-614
-97.51	-141.69	-608
-375.51	-108.78	-604
-323.37	-162.92	-604
-228.51	-198.9	-600
-91.97	-132	-596
450.74	-334.35	-574
456.81	-358.48	-574
397.26	-59.39	-580
269.38	-16.02	-578
337.44	2.56	-578
351.32	-103.65	-580
410.45	0.55	-582
375.54	48.14	-584
359.14	159.13	-584
334.8	114.83	-584
268.75	-89.52	-592
298.6	90.02	-592
409.86	-75.09	-596
371.98	15.54	-598
120.28	-15.17	-598
142.63	36.31	-598
220.89	158.91	-598
375.08	128.65	-598
405.93	-319.44	-598
153.07	107.72	-600
260.62	85.19	-602
187.54	148.3	-604
266.56	-228.29	-612
235.81	58.62	-612
390.56	27.65	-616
221.1	-24.31	-618
429.39	83.55	-618
522.78	122.45	-618
156	39.21	-616
482.04	-26.37	-616
509.3	38.04	-616
157.53	206.67	-616
729.87	-209.78	-614
481.27	-152.11	-610
528.37	-207.85	-610
532.56	-114.7	-610
622.7	13.47	-602
605.71	-9.77	-602
433.67	59.88	-592
552.78	138.2	-586
513.11	147.51	-586
495.98	140.04	-588
419.73	210.43	-590
453.85	182.19	-584
382.45	202.36	-582
490.59	63.28	-582
451.74	-92.44	-582
522.59	-244.97	-578
454.74	-129.25	-586
678.04	110.34	-604
691.21	116.5	-604
488.08	125.97	-596
438.29	-16.33	-602
533.48	312.29	-608
441.49	184.84	-608
607.17	327.86	-582
349.64	320.92	-606
345.11	254.16	-580
229.97	325.18	-588
246.69	238.95	-580
103.69	-34.05	-588
-240.25	-203.14	-598
487.44	178.14	-588
457.57	123.24	-592
514.69	60.52	-590
546.87	-404.36	-598
-643.29	201.1	-120
-154.06	63.24	-120
-277.05	-143.77	-120
-272.88	-239.73	-120
-192.51	-236.73	-120
-175.24	11.85	-120
-372.15	-243.51	-120
121.93	9.86	-120
79.96	-25.9	-120
-90.51	-171.17	-120
-252.08	-220.34	-120
365.35	-347.26	-136
538.94	-345.84	-120
499.15	-386.07	-124
609.38	-459.9	-102
630.12	-397.3	-100
354.7	-341.72	-98
638.6	-290.28	-104
501.06	-182.42	-94
366.35	-269.43	-94
653.68	-103.39	-98
599.98	-65.65	-106
472.85	-79.51	-106
431.15	-65.84	-104
380.27	-39.22	-104
456.72	-59.04	-96
388.75	-54.45	-96
234.19	-159.96	-94
173.87	-20.29	-94
385.34	2.27	-94
359.36	14.92	-94
392.19	127.31	-94
240.34	15.39	-94
177.15	24.85	-94
164.76	-1.08	-94
233.13	41.06	-94
438.26	-34.82	-110
553.32	-20.97	-112
471.44	-104.02	-124
361.61	-59.66	-130
449.15	-8.32	-128
291.04	-47.72	-116
337.84	-22.89	-116
472.24	29.05	-136
357.05	136.66	-136
349.27	80.22	-136
227.05	123.11	-136
186.94	156.12	-136
146.98	134.11	-134
218.32	4.17	-134
468.44	186.51	-136
521.44	153.37	-126
541.96	96.77	-126
335.67	110.51	-122
190.31	228.88	-102
286.07	238.36	-102
201.69	181.82	-120
248.17	171.52	-126
249.71	142.04	-116
261.89	78	-108
313.36	52.23	-98
313.17	-2.37	-92
331.14	87.33	-110
471.26	109.44	-110
607.93	35.65	-106
566.5	26.02	-118
519.57	55.58	-132
173.17	63.8	-134
367.59	132.28	-94
461.53	53.3	-96
575.43	55.14	-96
493.66	37.66	-116
135.81	368.49	-132
213.15	117.65	-130
217.78	133.36	-110
116.59	257.74	-96
348.86	99.91	-92
218.74	60.46	-96
168.89	95.21	-90
241.53	-13.61	-90
136	53.59	-104
361.85	122.6	-98
354.11	70.51	-104
366.83	76.1	-108
-58.55	135.23	-104
123.04	156.43	-106
48.01	141.37	-106
422.34	-2.52	-120
406.79	37.08	-118
388.89	61.43	-116
421.91	28.34	-80
470.44	36.58	-98
409.81	-10.69	-102
423.34	53.6	-106
442.17	-78.13	-112
378.44	-32.14	-82
-271.57	-265.01	-652
-315.85	-176.3	-662
-228.52	-255.99	-670
-187.17	-170.86	-674
-144.02	-84.86	-676
118.29	122.08	-648
185.82	124.42	-652
455.28	114	-650
408.02	223.66	-652
508.23	58.07	-652
391.88	196.7	-662
293.11	218.3	-666
385.41	80.32	-674
299.87	169.18	-674
154.04	204.04	-680
332.28	253.56	-680
325.5	182.92	-684
455.75	82.42	-684
414.67	22.8	-650
441.79	-139.26	-658
392.9	-238.41	-662
333.36	-8.14	-668
311.44	-153.8	-682
450.18	-37.67	-684
193.14	-84.82	-686
162.67	54.49	-660
434.51	-386.85	-668
-76.02	-139.84	-178
-227.33	-115.84	-184
-115.03	-114.03	-194
-210.7	-209.9	-198
-104.44	-114.86	-206
17.53	-41	-210
-206.95	-147.6	-210
321.06	0.98	-172
265.69	24.53	-178
314.97	-12.46	-182
315.7	68.13	-190
370.68	33.18	-196
26.41	1.89	-200
185.16	-28.47	-208
421.48	-275.7	-180
345.06	-335.8	-190
352.9	-217.88	-204
269.66	-357.65	-208
593.1	-338.2	-212
613.28	-337.64	-208
426.91	-395.2	-206
333.95	-380.96	-210
152.54	-277.92	-206
134.51	-200.51	-188
380.95	44.35	-184
334.05	78.21	-190
432.53	-89.71	-192
538.42	-63.69	-194
596.76	-105.54	-196
668.42	-131.38	-196
658.13	-128.72	-206
377.72	284.12	-176
366.36	205.68	-176
465.13	203.24	-184
369.81	148.88	-188
368.41	271.39	-190
468.9	245.21	-194
432.96	157.85	-198
299.75	250.97	-196
306.14	224.69	-200
389.26	195.53	-206
286.55	315.81	-202
522	134.2	-204
435.79	290.96	-212
506.3	151.99	-194
491.94	105.77	-192
176.28	95.83	-194
191.15	161.58	-194
142.72	276.56	-198
132.82	221.77	-204
184.99	335.37	-210
184.55	280.59	-212
184.55	280.59	-208
-312.06	147.33	-716
-75.29	-132.15	-680
-358.75	-146.68	-686
-290.4	-53.04	-690
-147.83	-111.83	-690
-277.56	-143.55	-698
10.83	-69.73	-696
-279.15	-254.36	-700
-186.25	-217.93	-708
-144.7	-193.01	-712
-198.07	-144.41	-714
-277.82	-164.65	-716
-75.2	-143.44	-710
596.35	191.88	-666
435.43	56.05	-672
335.21	164.78	-674
452.94	175.33	-674
226.89	191.96	-670
110.32	285.69	-672
221.14	147.97	-670
260.79	98.26	-672
243.66	94.25	-676
247.24	168.81	-680
212.42	259.52	-680
310.56	247.66	-676
297.22	138.77	-676
509.09	97.59	-672
507.39	161.18	-668
492.63	158.77	-668
154.76	215.34	-674
364.87	191.05	-678
373.4	110.39	-682
292.6	87.89	-682
275.52	151.6	-684
268.65	177.56	-688
203.87	263.58	-688
176.34	278.69	-690
163.69	262.07	-690
181.5	169.18	-694
231.9	160.03	-696
207.43	240.52	-696
237.33	227.01	-694
241.54	221.03	-698
113.81	146.81	-698
406.01	257.19	-698
404.23	303.99	-700
498.31	283.59	-698
526.47	159.45	-694
542.66	125.91	-696
431.28	150.77	-700
439.56	166.88	-694
464.38	146.07	-692
468.89	231.09	-690
565.13	180.11	-690
687.93	239.99	-686
784.62	286.5	-690
598.34	198.27	-688
373.81	146.23	-674
457.11	199.25	-680
586.36	162.76	-684
608.61	16.64	-686
505.06	80.16	-684
423.66	94.75	-684
464.04	325.08	-682
226.64	338.24	-686
310.11	283.77	-686
354.23	165.87	-686
440.91	127.68	-684
421.69	157.49	-680
423.79	137.22	-690
269.3	145.12	-696
369.58	125.13	-694
503.5	73.64	-694
308.79	166.94	-702
356.73	217.41	-702
488.41	10.14	-702
411.76	118.07	-700
285.22	301.33	-694
486.09	146.79	-668
497.09	210.63	-674
130.99	197.51	-680
351.83	222.67	-676
365.88	197.28	-702
492.42	197.14	-668
106.95	33.84	-672
433.94	-179.96	-676
295.67	28.82	-678
400.33	-38.02	-680
308.46	53.54	-680
298.7	-108.7	-684
149.53	23.37	-684
73.86	10.81	-692
268.58	-77.57	-690
317.34	35.96	-700
359.39	-227.59	-706
475.4	-344.25	-696
193.7	93.88	-696
476.28	-241.75	-678
17.74	55.13	-678
502.84	-108.81	-694
733.29	-148.65	-682
696.95	-166.55	-682
453.03	-375.44	-708
565.54	-275.36	-706
671.67	-91.92	-698
-393.44	-73.33	-208
-293.63	-46.14	-212
-364.4	-208.69	-220
-256.23	-212.46	-236
-398.97	10.95	-238
-180.53	-158.95	-246
-1.37	82.41	-240
50.74	18.91	-246
53.18	-3.06	-246
31.92	-33.7	-250
166.39	-2.68	-248
-195.55	-147.11	-252
148.04	77.31	-260
175.79	294.87	-228
473	282.66	-238
499.97	276.94	-244
551.08	313.87	-256
331.98	264.1	-260
458	316.72	-258
220.81	268.15	-264
190.65	267	-252
321.6	208.14	-232
354.06	186.6	-234
446.23	193.94	-234
475.2	213.92	-238
598.45	168.28	-238
560.45	167.29	-238
464.88	65.21	-236
518.61	26.8	-240
422.13	103.14	-238
401.44	90.01	-242
381.84	41.15	-240
310.88	76.14	-244
398.89	135.67	-240
420.39	149.91	-238
359.29	158.66	-240
432.58	-22.19	-242
250.88	84.09	-246
242.93	197.17	-244
324.95	171.93	-244
280.1	144.67	-248
174.25	162.98	-246
140.71	159.9	-244
135.93	180.61	-246
205.37	84.95	-248
351.53	33.75	-250
282.22	80.44	-250
246.65	65.68	-254
188.45	88.72	-252
209.13	110.21	-248
502.37	-5.89	-250
400.55	71.96	-254
404.01	-14.76	-256
466.31	197.55	-244
429.5	187.39	-242
490.89	166	-244
590.41	26.93	-242
482.03	-67.7	-242
158.26	161.2	-252
163.15	185.91	-254
120.17	137.59	-254
246.09	166.35	-256
300.68	163.61	-258
397.88	177	-256
440.04	159.22	-254
555.81	43.34	-254
327.11	142.36	-258
390.4	-17.28	-258
446.63	-61.64	-258
450.66	-32.73	-260
441.78	-6.37	-256
589.41	-142.9	-242
492.12	-150.14	-246
501.1	-170.25	-246
495.41	-159.32	-256
467.84	-179.07	-256
393.84	-39.4	-244
188.46	-110.71	-242
371.73	-171.94	-246
216.64	-263.86	-250
437.49	-341.21	-250
394.82	-285.72	-252
351.93	-274.05	-256
366.98	-290.03	-242
-256.39	-120.947	-798.61
-133.998	207.915	-790.764
6.854	-91.4815	-791.183
-94.4154	-117.584	-796.854
333.933	235.277	-793.392
357.149	88.0358	-798.61
204.762	160.625	-796.236
308.531	37.0306	-795.894
289.508	6.0801	-790.724
360.369	-349.837	-792.546
475.625	-15.4044	-792.226
484.172	193.022	-789.773
527.089	96.6734	-789.927
480.417	-298.14	-798.61
465.423	-419.646	-791.661
579.906	-218.37	-793.318
546.172	-203.64	-790.995
-353.965	-61.2491	-786.751
-240.18	-274.017	-786.755
373.17	283.991	-783.982
668.183	-301.004	-787.983
-135.308	-2.61477	-718.61
-78.6427	-11.2828	-714.399
-186.266	-209.055	-713.65
-140.732	-200.041	-712.484
107.011	294.553	-712.119
243.303	246.3	-712.59
298.48	185.05	-711.756
378.652	207.295	-714.012
235.817	120.859	-718.61
304.342	-5.8462	-718.61
418.573	363.087	-713.312
589.859	25.5368	-718.61
430.649	-76.9559	-716.404
445.653	-74.5429	-712.767
429.255	-6.2282	-710.238
528.545	157.631	-710.592
637.432	-399.255	-712.744
373.548	-353.909	-709.753
514.808	-175.455	-709.252
723.663	-357.311	-716.091
-58.0875	-69.0549	-707.355
296.069	295.573	-708.195
131.231	146.223	-701.93
459.423	228.304	-703.347
576.491	171.641	-701.93
519.453	-25.1601	-707.217
442.182	-373.911	-703.826
604.326	-285.666	-704.607
645.406	-284.798	-701.93
-365.139	261.569	-631.761
-46.0252	9.25111	-629.351
-206.29	-208.276	-635.103
6.7186	-103.874	-632.288
108.97	448.643	-629.157
112.938	272.724	-629.862
183.607	230.132	-638.61
238.238	231.065	-638.61
250.524	240.031	-638.61
264.475	151.12	-638.61
278.758	44.4905	-638.61
225.922	127.775	-634.671
269.049	134.007	-634.171
346.94	146.901	-631.796
354.248	57.911	-634.176
195.466	155.058	-631.034
238.406	135.365	-631.165
433.508	363.385	-631.038
459.651	91.1451	-634.279
380.076	-318.882	-630.012
492.727	-65.6208	-630.196
6.30655	-70.9963	-627.017
153.876	330.874	-627.539
141.36	160.387	-627.994
449.856	306.667	-627.036
484.603	392.285	-621.93
503.527	-16.7185	-628.663
667.671	154.682	-627.1
369.12	197.833	-623.95
579.784	-356.158	-627.818
-136.373	-202.654	-549.829
68.802	24.3392	-558.61
206.413	101.391	-558.61
213.474	154.322	-558.61
265.391	96.6442	-558.61
199.834	-101.916	-550.786
398.364	7.20167	-558.61
481.485	52.5073	-558.61
415.289	-101.972	-553.389
464.752	19.3113	-553.411
535.69	-130.142	-558.61
429.82	-385.523	-551.116
607.118	-259.864	-549.52
630.546	-320.714	-550.436
-234.839	-201.005	-472.967
57.8006	101.918	-478.61
84.5665	43.8322	-478.61
108.059	35.4541	-478.61
149.609	104.936	-478.61
-89.034	-70.7367	-472.861
21.7058	63.369	-470.531
-178.12	-202.616	-470.055
280.85	280.055	-478.61
296.824	239.347	-478.61
303.375	218.919	-478.61
311.177	290.933	-475.829
291.308	198.289	-473.61
222.904	141.051	-478.61
266.37	10.8904	-478.61
273.771	90.5768	-478.61
317.22	169.109	-478.61
163.923	80.7305	-475.776
386.809	92.0081	-471.311
673.31	-387.824	-470.252
528.755	-447.828	-466.973
516.572	-323.927	-463.648
-97.6287	27.8099	-398.61
-12.8087	-59.5503	-398.61
-244.631	13.7805	-392.06
57.5608	116.753	-393.74
309.091	264.331	-398.61
331.697	351.058	-398.61
356.265	333.692	-398.61
315.061	280.026	-395.535
157.16	176.039	-398.61
175.084	107.606	-398.61
220.962	124.036	-398.61
231.864	12.4402	-398.61
367.009	148.081	-392.3
305.613	-323.221	-395.707
406.483	-73.7738	-398.61
451.809	-177.396	-398.61
370.793	-370.102	-386.454
-308.744	-305.212	-313.312
107.77	349.068	-318.61
-185.125	-178.73	-314.024
215.045	219.247	-318.61
237.46	251.114	-318.61
247.906	207.333	-318.61
323.485	392.305	-318.61
397.549	365.167	-318.61
215.846	296.704	-316.575
338.033	256.088	-315.337
135.642	207.828	-313.359
118.082	118.181	-318.61
127.58	173.485	-318.61
170.134	77.2333	-318.61
255.793	111.542	-318.61
393.855	73.6096	-318.61
179.571	127.233	-315.833
234.986	44.2066	-310.336
395.071	-211.932	-315.341
324.2	-330.612	-312.52
333.647	-320.906	-310.858
432.631	125.183	-314.849
-147.283	-126.049	-307.22
-381.566	-354.156	-229.397
-116.902	-212.922	-233.101
106.426	211.729	-233.045
160.707	219.441	-232.837
239.063	265.243	-233.435
276.065	207.905	-233.481
204.591	209.217	-228.966
38.4124	49.4379	-238.61
328.081	-18.8569	-238.61
69.2708	57.838	-232.858
121.025	140.783	-233.932
167.671	114.365	-234.337
177.922	156.08	-233.313
320.068	134.928	-231.134
520.62	-147.647	-232.749
381.846	108.69	-230.523
499.675	-197.02	-235.125
337.786	-361.454	-233.222
467.126	-330.734	-232.522
527.005	-298.556	-231.163
-155.086	-267.161	-227.301
273.325	184.698	-226.383
343.937	253.645	-226.182
375.589	294.737	-228.839
127.157	284.069	-225.902
84.8403	173.39	-149.822
310.503	176.312	-153.142
357.905	234.161	-151.997
153.876	207.317	-150.333
331.737	189.99	-150.637
369.3	279.854	-150.71
208.98	100.821	-151.983
309.649	91.1699	-153.689
156.22	73.7555	-150.832
209.546	131.569	-150.207
206.271	11.5171	-151.413
306.85	-27.3707	-150.386
332.028	-330.473	-152.54
374.062	-327.384	-152.446
-344.276	-213.154	-145.394
-9.15693	-118.787	-143.819
151.875	266.061	-146.75
353.317	268.12	-146.782
368.753	351.957	-148.651
191.924	307.048	-144.069
175.734	164.977	-148.053
382.032	42.5385	-148.654
337.489	-8.76578	-145.398
402.476	-368.055	-147.632
431.072	-392.937	-148.541
527.457	-379.459	-147.041
415.297	-344.175	-144.474
-137.652	-65.5396	-69.7341
159.141	289.871	-72.3766
184.96	170.064	-72.9246
248.639	234.109	-73.9828
211.354	163.079	-69.5585
308.588	154.119	-70.9846
374.305	240.141	-71.4352
381.918	189.424	-71.4867
398.977	303.086	-71.0132
153.537	144.807	-74.1258
408.578	-174.029	-72.0083
341.529	-83.8479	-70.6604
339.033	-180.332	-76.132
430.365	51.7492	-70.1418
445.747	-125.548	-69.3147
610.348	-366.959	-73.3254
552.696	-334.756	-69.822
223.27	260.943	-68.6162
329.81	31.5392	-67.3256
376.403	-33.1388	-61.93
469.57	64.5467	-61.93
207.663	243.9	-793.05
249.611	244.881	-793.05
268.632	169.15	-793.05
268.51	141.931	-790.27
256.115	91.1946	-793.05
199.291	71.3467	-795.83
429.853	22.372	-790.27
-143.134	-8.26066	-790.27
391.797	-199.345	-790.27
292.704	-431.238	-793.05
328.218	-470.937	-795.83
506.484	-457.317	-790.27
-253.131	-200.178	-793.05
430.192	-192.26	-707.49
386.331	-181.445	-707.49
15.013	-99.4256	-710.27
-295.937	-276.454	-707.49
-257.796	-204.436	-707.49
560.002	72.8098	-713.981
516.705	55.493	-717.058
300.869	53.5201	-713.05
273.613	104.015	-710.27
168.395	263.425	-713.05
443.658	320.102	-712.973
208.101	378.182	-711.294
17.3569	-33.3966	-710.27
-86.0504	11.9138	-710.27
348.188	-419.352	-708.545
420.248	-410.083	-707.808
503.162	-317.231	-706.978
159.572	135.119	-715.83
158.772	123.765	-715.83
165.915	205.081	-713.05
385.402	124.911	-715.697
422.216	263.315	-712.271
139.047	239.553	-638.61
175.071	100.925	-638.208
196.192	75.5395	-637.84
253.009	81.073	-638.008
302.563	-19.7361	-637.15
396.913	30.3854	-637.557
394.612	51.2522	-637.032
501.446	79.1461	-637.002
376.347	310.67	-638.61
265.154	336.57	-638.61
321.516	347.738	-638.61
302.777	199.052	-638.61
278.006	152.453	-636.349
675.152	-85.141	-634.162
395.525	-45.9617	-637.406
386.409	-35.1024	-637.042
511.307	-93.7634	-635.565
418.617	-205.526	-637.678
389.603	-248.729	-637.458
418.738	-414.234	-637.642
625.883	-380.795	-635.956
528.004	-318.17	-638.307
461.182	-229.365	-638.482
375.999	224.961	-638.61
266.901	191.153	-638.61
318.275	169.403	-547.477
330.138	141.064	-547.476
359.881	138.629	-550.255
364.295	98.4717	-550.255
422.409	20.3848	-547.472
385.329	-0.700677	-553.034
346.747	-10.7706	-547.476
475.223	54.0516	-550.25
250.455	85.178	-553.04
125.488	100.197	-553.045
-9.50034	119.392	-550.27
-214.484	-192.006	-550.279
370.178	-145.421	-550.255
384.057	-348.637	-547.474
378.757	-380.662	-550.254
487.48	-364.059	-547.47
472.645	-431.246	-550.251
482.761	-312.85	-547.47
504.524	-77.1026	-550.249
523.262	-66.1134	-550.248
79.8713	-107.312	-553.047
382.924	-410.119	-547.474
412.038	-452.306	-550.253
511.117	-220.01	-550.249
445.803	-164.65	-550.252
397.871	304.905	-470.27
488.544	322.355	-470.27
433.387	341.194	-470.27
416.322	175.474	-473.05
421.845	100.981	-467.49
455.512	102.94	-470.27
322.131	143.937	-473.05
329.316	107.052	-473.05
303.377	38.2424	-473.05
212.708	69.8531	-473.05
148.575	88.1444	-473.05
153.617	169.589	-467.49
169.554	222.54	-467.49
250.572	193.961	-467.49
4.29823	70.3281	-470.27
-184.495	-242.543	-470.27
238.621	-69.3829	-473.05
333.696	181.978	-467.49
413.776	-256.021	-470.27
465.657	-203.179	-467.49
473.451	-426.966	-470.27
417.774	-185.744	-473.05
395.815	10.6231	-473.05
444.27	-184.115	-470.27
144.897	63.6803	-473.05
323.07	231.18	-390.27
320.919	135.057	-387.49
255.26	113.924	-390.27
238.28	84.2602	-390.27
195.73	163.924	-395.83
152.019	148.018	-387.49
155.242	129.156	-393.05
109.217	32.0034	-390.27
99.012	39.7842	-395.83
-174.812	-177.976	-390.27
-150.711	-222.592	-387.49
-239.671	-239.4	-384.71
-95.4169	-176.838	-384.71
-81.8516	-135.573	-390.27
201.985	-208.555	-393.05
318.391	-266.11	-384.71
345.825	-286.327	-384.71
360.792	-354.636	-390.27
351.993	-388.012	-390.27
483.775	-479.209	-384.71
438.826	-70.9385	-393.05
310.758	-4.01843	-390.27
241.645	-39.5761	-384.71
433.997	46.364	-387.49
540.115	48.3489	-387.49
483.118	98.1826	-390.27
553.312	103.323	-390.27
434.227	146.315	-390.27
394.591	147.555	-393.05
377.261	193.817	-387.49
31.2981	-9.40376	-395.83
18.0644	-16.6406	-398.61
167.921	40.5663	-395.83
371.816	-334.822	-310.27
477.887	-390.048	-304.71
457.793	-430.526	-301.93
613.291	-418.434	-304.71
582.937	-366.539	-310.27
568.337	-75.8262	-301.93
578.497	-30.6319	-310.27
585.711	-12.6681	-301.93
349.823	-74.2876	-313.05
274.094	-184.759	-304.71
273.849	26.1256	-310.27
237.326	75.4114	-307.49
252.418	165.038	-315.83
241.933	128.687	-304.71
268.113	109.393	-304.71
351.322	162.725	-310.27
380.962	259.051	-310.27
394.52	257.382	-310.27
468.257	137.838	-310.27
185.925	227.447	-307.49
136.684	225.359	-313.05
99.5598	214.587	-313.05
54.946	60.6423	-310.27
90.2834	31.3904	-313.05
30.2838	-8.63739	-315.83
9.38319	-104.42	-307.49
-207.406	57.5562	-313.05
669.258	-361.114	-313.05
134.614	51.7576	-301.93
300.12	137.795	-307.49
427.974	185.35	-235.83
412.046	69.7162	-235.83
352.982	161.209	-238.61
341.966	187.42	-238.61
241.548	251.944	-235.83
187.59	228.893	-233.05
131.76	214.254	-230.27
248.303	88.7179	-235.83
314.64	259.547	-235.83
382.896	186.827	-238.61
364.146	141.742	-235.83
111.918	-1.87077	-233.05
-85.0276	-70.8725	-224.71
-132.59	-184.837	-238.61
409.337	-173.727	-235.83
502.121	-208.546	-235.83
475.515	-398.416	-235.83
381.282	-179.164	-238.61
69.4888	-49.6515	-233.05
81.6327	18.2181	-235.83
-58.7923	-96.6093	-144.71
-68.8427	-148.712	-150.27
-7.9364	-135.422	-155.83
8.24639	-119.707	-155.83
-8.2506	-72.8063	-155.83
-206.37	-223.776	-155.83
112.116	-1.51236	-158.61
58.0401	62.5956	-155.83
1.36125	66.4983	-150.27
173.976	117.914	-158.61
146.064	153.05	-153.05
175.976	159.731	-155.83
143.397	196.356	-150.27
94.5961	202.977	-153.05
300.731	137.125	-158.61
324.062	187.232	-155.83
381.043	257.295	-153.05
422.468	242.644	-144.71
358.752	115.33	-155.83
363.162	85.9345	-150.27
393.548	74.8541	-147.49
393.432	52.6899	-155.83
332.317	46.3876	-153.05
352.144	10.8027	-155.83
402.674	-274.28	-153.05
423.292	-282.396	-147.49
336.965	-248.389	-155.83
390.177	-143.609	-153.05
374.489	-224.513	-155.83
82.7814	-18.8963	-147.49
523.138	-189.728	-70.27
543.826	-324.693	-73.05
406.142	-352.972	-73.05
419.975	-390.738	-67.49
397.349	-178.896	-67.49
352.181	-96.7612	-73.05
423.017	-32.4971	-70.27
414.885	172.809	-73.05
400.707	181.813	-64.71
284.335	258.747	-73.05
216.308	189.497	-70.27
226.804	170.003	-73.05
264.617	202.132	-64.71
121.619	166.552	-67.49
138.01	130.662	-73.05
166.899	135.779	-70.27
153.22	-17.4925	-73.05
197.414	-12.8796	-73.05
103.429	-85.9495	-78.61
-292.258	-58.3445	-78.61
-179.266	-115.442	-64.71
178.028	186.652	-64.71
238.288	205.405	-64.71
226.672	278.437	-64.71
119.217	334.108	-70.27
294.052	84.4008	-70.27
303.5	-96.0528	-75.83
139.889	-51.5825	-73.05
93.34	311.408	-64.71
558.126	-178.07	-792.521
535.029	-271.232	-791.088
472.327	-322.811	-790.767
431.404	-342.481	-793.265
511.551	-216.82	-788.409
517.586	-127.205	-798.38
422.467	86.0235	-798.38
414.89	112.165	-798.38
405.835	116.303	-798.38
374.557	-8.3983	-798.38
471.245	-128.607	-794.373
321.759	73.3656	-794.909
523.607	82.4998	-790.778
373.764	114.857	-791.412
319.756	-49.9913	-792.295
264.482	71.9274	-790.661
267.191	-4.03555	-792.884
382.859	118.366	-790.182
327.143	31.4451	-789.264
265.581	42.339	-788.321
490.425	229.555	-792.524
472.163	215.469	-791.017
398.515	177.338	-790.455
368.503	220.36	-793.429
362.411	170.986	-792.434
244.727	118.087	-792.867
109.864	-8.76213	-788.23
221.433	254.747	-790.782
211.582	211.582	-789.784
208.014	201.043	-789.201
-294.516	-384.556	-794.949
-310.603	-268.63	-792.554
-351.593	-414.915	-788.531
-206.106	-151.565	-794.131
-256.378	-179.716	-794.752
-221.096	-200.134	-793.116
-215.51	-120.172	-788.8
-362.075	204.73	-788.938
-404.154	121.513	-792.501
600.168	-12.9749	-784.622
448.719	-447.741	-785.539
277.727	53.9666	-786.67
492.465	322.156	-785.898
190.086	19.973	-785.463
-269.665	-268.711	-785.912
-90.1102	-197.967	-785.987
-111.883	21.6404	-786.552
492.324	-366.371	-718.38
445.474	-254.771	-712.291
619.064	44.0189	-718.38
609.616	5.57464	-718.38
564.772	49.0104	-718.38
557.668	26.0356	-718.38
538.589	93.7438	-718.38
530.853	67.2527	-718.38
514.056	-67.6653	-718.38
458.389	112.397	-718.38
390.264	76.9197	-718.38
440.195	-169.194	-714.94
407.552	-150.25	-714.564
570.061	215.002	-718.38
554.799	376.401	-718.38
538.929	391.01	-718.38
450.687	262.079	-718.38
436.965	219.649	-718.38
429.349	237.356	-718.38
367.631	310.345	-718.38
345.475	215.796	-718.38
333.265	199.976	-713.604
469.55	191.021	-713.206
330.66	18.1092	-718.38
287.158	36.8191	-718.38
265.928	63.3553	-718.38
263.02	45.1467	-718.38
249.028	102.719	-718.38
246.009	62.1256	-718.38
225.378	99.9521	-718.38
212.665	81.4269	-718.38
180.934	-59.6775	-718.38
298.489	3.49751	-711.306
284.767	154.637	-718.38
232.859	215.815	-718.38
237.142	117.559	-718.38
222.97	150.276	-718.38
167.874	193.449	-718.38
155.515	242.076	-718.38
151.829	137.249	-718.38
245.835	161.428	-716.296
142.884	265.182	-716.129
305.538	245.465	-712.26
-72.2462	-83.7982	-718.38
-103.749	-149.1	-718.38
-154.275	0.453537	-718.38
-150.765	-197.06	-718.38
-180.873	-106.268	-718.38
-197.728	-215.232	-718.38
-225.761	-244.007	-718.38
-235.537	-155.492	-718.38
-60.775	38.212	-714.945
-189.144	-203.52	-712.797
-254.093	170.109	-718.38
-285.909	-180.573	-718.38
-589.741	-11.2884	-718.38
-348.622	-231.833	-711.566
458.463	-401.267	-638.38
451.573	-327.623	-638.38
439.78	-274.757	-638.38
378.289	28.52	-638.38
339.688	45.2361	-638.38
420.517	-186.536	-635.069
456.639	-74.3859	-631.389
269.454	-3.8846	-632.145
489.436	248.175	-638.38
430.502	241.519	-638.38
416.223	182.853	-638.38
405.67	292.906	-638.38
390.323	242.237	-638.38
383.724	165.22	-638.38
375.686	337.796	-638.38
371.283	214.823	-638.38
335.866	160.03	-638.38
312.094	254.428	-638.38
300.017	227.465	-638.38
279.531	169.68	-638.38
500.867	104.835	-633.892
469.532	374.122	-636.141
475.19	113.652	-634.27
388.235	147.712	-635.722
369.657	71.4784	-635.904
317.638	193.04	-634.596
313.747	205.124	-635.602
354.454	181.879	-632.337
308.178	81.4495	-631.376
273.418	83.1961	-631.805
257.061	395.315	-638.38
246.167	-223.578	-638.38
214.452	33.9394	-638.38
214.013	-82.0615	-638.38
27.8688	-29.8067	-638.38
14.2403	-60.67	-638.38
-0.226036	-67.5821	-638.38
199.935	-65.8529	-634.786
260.357	213.651	-638.38
236.691	248.119	-638.38
236.347	116.491	-638.38
180.938	228.024	-638.38
157.773	250.624	-638.38
67.0144	61.2669	-638.38
164.608	214.417	-634.41
164.498	71.2157	-635.689
108.71	61.6468	-635.687
212.113	80.6043	-631.293
59.5133	196.583	-630.113
-180.663	-307.232	-638.38
-254.402	-325.542	-633.826
-80.9033	-180.073	-638.38
-148.042	-124.563	-638.38
-176.133	-134.159	-638.38
-196.854	-181.302	-638.38
-230.048	-98.3511	-638.38
-288.12	-259.682	-638.38
-294.104	-195.495	-638.38
-97.776	20.5099	-633.193
-219.348	-156.042	-631.416
-141.523	126.684	-638.38
-156.282	127.563	-638.38
-182.848	122.324	-638.38
-612.209	-22.6977	-638.38
-592.478	192.467	-638.38
-466.359	176.423	-629.963
652.332	-344.683	-558.38
647.202	-204.785	-558.38
568.509	12.8877	-558.38
454.547	-251.158	-558.38
520.114	70.4174	-558.38
510.91	64.3188	-558.38
515.278	-135.437	-558.38
395.252	-64.3778	-558.38
387.858	-2.94028	-558.38
337.143	-67.5786	-558.38
305.366	-76.4475	-558.38
375.306	-109.073	-551.018
330.339	43.532	-552.248
306.468	-35.3762	-552.77
251.501	-0.0758181	-551.463
522.715	162.806	-558.38
473.691	359.957	-558.38
423.243	281.661	-558.38
396.301	283.183	-558.38
317.5	153.038	-558.38
293.515	235.008	-558.38
253.137	77.8815	-558.38
242.094	87.0933	-558.38
276.247	160.956	-555.362
553.149	107.939	-551.684
356.867	194.343	-552.766
330.449	213.543	-550.484
254.785	378.829	-550.528
239.415	384.212	-552.119
267.478	353.344	-548.919
238.282	-77.6299	-558.38
120.883	33.5655	-558.38
118.475	-36.6287	-558.38
102.888	-19.956	-558.38
42.815	-13.231	-558.38
30.5994	9.36651	-558.38
18.2443	-22.7861	-558.38
-29.5428	-13.0918	-558.38
124.833	-75.2485	-556.268
85.6309	11.3826	-556.624
-5.31049	-98.6942	-556.42
205.075	-8.93441	-551.867
186.056	-43.3371	-551.069
-19.3922	19.071	-551.911
218.367	112.438	-558.38
165.059	164.318	-558.38
165.441	103.878	-558.38
135.471	236.958	-558.38
95.1223	210.091	-558.38
87.6068	200.445	-558.38
61.6402	242.288	-558.38
71.8452	179.899	-551.361
18.2091	56.9668	-552.636
-86.1608	-64.7336	-558.38
-121.808	45.818	-558.38
-125.996	15.3937	-558.38
-158.755	-11.9403	-558.38
-167.75	-35.573	-558.38
-167.79	-114.138	-558.38
-197.155	-252.563	-558.38
-221.945	-33.9747	-558.38
-312.582	-68.0873	-558.38
-92.9367	21.2039	-554.571
-94.7237	33.4738	-556.754
-152.572	-256.346	-555.342
-189.774	-38.5022	-556.71
-144.67	-7.9696	-552.588
-230.883	-213.961	-551.194
-332.703	-50.8644	-551.006
-351.565	318.551	-558.38
-361.711	311.677	-558.38
-317.985	224.039	-551.5
-443.614	-15.0479	-558.38
-395.514	-262.946	-549.612
-446.635	5.61031	-550.109
-571.528	145.583	-555.451
-576.188	191.194	-547.72
589.238	53.9084	-473.094
566.188	223.815	-473.826
528.171	103.387	-475.754
563.053	200.924	-470.554
566.451	105.451	-472.32
530.541	114.33	-473.05
531.261	165.484	-467.979
462.934	-308.805	-474.816
413.023	-315.564	-467.733
361.781	29.9972	-478.38
512.216	-228.275	-474.157
386.617	-91.5581	-476.055
227.196	17.7498	-474.389
502.203	-5.32042	-472.831
477.067	-128.186	-471.117
444.367	-228.483	-470.857
397.49	18.2487	-471.494
352.858	-246.668	-473.097
512.38	11.2397	-469.069
283.835	127.149	-478.38
453.253	283.198	-475.819
440.909	286.801	-475.433
351.741	239.855	-473.585
352.579	182.431	-474.954
218.694	141.485	-474.362
406.926	231.757	-472.286
310.501	248.502	-471.784
395.017	216.322	-469.849
384.656	216.063	-467.668
373.762	226.316	-468.822
353.255	60.1851	-467.758
252.605	82.1201	-468.121
245.469	201.344	-468.954
501.101	405.599	-473.257
384.779	399.464	-467.042
200.811	-8.18893	-478.38
109.735	-134.829	-474.154
68.0005	-118.781	-474.471
52.2882	-115.391	-471.667
-68.3313	-257.389	-471.068
93.1603	-61.2674	-468.722
67.5436	28.3942	-470.041
63.0623	-80.5526	-467.694
127.77	88.844	-472.462
107.453	285.652	-472.426
126.341	212.847	-468.764
97.443	343.757	-467.288
-226.91	-211.863	-474.627
-134.921	-123.013	-471.706
-178.647	-238.128	-473.237
-314.944	-165.585	-470.346
-127.4	-89.263	-467.356
302.324	30.3537	-465.914
360.32	282.155	-465.505
176.678	-31.0634	-465.688
164.497	-24.1596	-466.386
75.1025	12.0487	-465.974
-79.8264	-185.852	-466.53
183.433	92.6167	-465.897
-216.727	-261.321	-466.036
-269.144	-272.603	-465.435
-302.443	-267.2	-464.792
428.57	-321.709	-392.923
373.419	39.399	-391.514
377.597	-85.224	-390.759
353.604	37.4119	-392.586
546.381	1.03768	-387.89
548.476	-178.364	-389.274
512.908	-178.789	-389.156
435.786	254.001	-392.666
425.987	83.2639	-392.485
417.772	217.588	-392.783
395.897	233.615	-392.456
357.878	197.601	-392.626
356.617	220.508	-392.638
353.126	82.6144	-392.527
340.278	193.075	-392.892
332.015	184.653	-392.952
318.95	189.656	-392.399
307.624	284.393	-392.351
257.842	290.727	-391.321
253.577	135.112	-390.825
475.775	147.873	-388.613
431.245	226.953	-390.123
339.974	333.435	-389.908
286.617	150.264	-387.767
249.332	238.485	-387.126
44.7028	-70.4073	-389.113
201.889	256.169	-393.462
174.682	258.872	-390.983
117.113	93.8496	-391.186
-10.9692	49.4264	-393.365
163.62	288.578	-387.232
98.5981	105.847	-387.939
-99.7739	-234.303	-391.875
-103.485	-86.0665	-387.613
-111.395	-150.435	-387.493
-140.595	-216.652	-390.12
-208.921	-65.7787	-388.993
-219.887	-99.4702	-389.186
-240.129	-224.909	-387.766
-309.434	-155.98	-388.366
491.327	-13.7687	-386.676
377.279	-46.1933	-385.591
309.006	208.866	-384.402
294.969	379.849	-384.207
206.617	198.438	-385.173
184.239	225.227	-384.175
174.471	219.429	-384.655
-37.0557	81.0147	-385.657
-123.629	-100.258	-385.883
563.515	-8.94681	-315.149
555.641	172.501	-314.13
420.47	-305.26	-314.34
493.05	92.3935	-318.38
505.625	8.92833	-314.458
311.445	-6.28905	-314.088
267.099	108.246	-315.216
242.726	111.23	-315.27
443.263	-77.6249	-311.037
402.967	57.7337	-311.241
300.315	38.2159	-310.766
244.069	-46.702	-309.924
531.392	210.53	-314.233
328.949	219.758	-314.83
267.039	194.372	-315.466
414.607	271.926	-313.384
414.308	227.144	-311.919
394.455	186.934	-311.306
372.416	254.214	-312.295
370.372	217.97	-312.172
361.431	271.097	-312.602
363.053	164.043	-312.825
345.418	249.864	-312.419
345.378	163.284	-313.319
278.514	261.306	-311.187
195.211	42.5476	-314.815
223.28	45.9846	-312.869
219.046	74.5045	-311.741
207.673	56.1824	-312.631
153.875	54.4354	-311.797
102.898	61.4498	-310.706
205.28	-47.5995	-309.775
128.497	10.0075	-310.237
65.1264	5.89366	-309.828
202.667	283.19	-315.003
184.714	283.79	-315.394
-201.949	-248.053	-312.599
-217.198	-222.606	-311.331
-224.027	-253.431	-310.408
-256.753	-245.651	-311.717
-169.221	-210.9	-309.423
-214.473	75.4124	-314.61
-229.436	74.9874	-314.825
-131.824	-69.2707	-311.974
-302.103	18.6922	-311.673
-277.699	-203.317	-309.573
-444.593	227.465	-311.51
-641.971	183.085	-308.313
543.552	73.2508	-231.105
538.142	126.288	-233.163
465.761	-339.719	-238.38
472.663	-458.729	-234.737
455.241	-343.701	-234.892
354.049	-311.595	-229.514
518.533	101.268	-238.38
413.429	-73.9633	-238.38
393.48	38.0875	-238.38
360.331	-116.935	-238.38
328.014	-84.2509	-238.38
264.909	-105.277	-238.38
274.86	-159.796	-236.105
280.082	-135.901	-232.684
516.276	-105.509	-229.766
493.954	77.3955	-229.035
422.711	-164.237	-228.901
408.338	114.384	-238.38
356.351	116.075	-238.38
270.21	142.472	-238.38
242.469	145.482	-238.38
349.744	151.105	-234.65
451.109	369.565	-231
386.089	220.493	-232.972
374.746	230.431	-231.492
296.018	182.745	-232.113
205.4	166.087	-230.587
443.16	242.421	-229.309
391.507	161.254	-229.376
158.046	-234.328	-232.424
-35.7144	-169.004	-238.38
-65.0897	-199.726	-238.38
106.136	-7.82515	-234.943
141.839	-8.1689	-227.474
114.455	45.1783	-228.533
101.201	52.0695	-228.344
51.3746	71.9083	-229.838
194.561	203.382	-238.38
169.651	158.842	-228.537
115.95	238.007	-229.171
-149.729	-451.286	-238.38
-135.06	-267.21	-235.872
-206.703	-284.9	-230.283
-144.828	-200.192	-238.38
-166.823	-223.744	-238.38
-200.984	-210.244	-238.38
-120.069	-175.999	-235.165
-173.255	-197.979	-231.539
-239.938	-211.506	-233.376
-277.312	-163.209	-232.358
-431.493	208.745	-236.538
-449.261	178.713	-234.288
-470.798	163.313	-230.972
698.038	-201.382	-150.345
489.872	-227.293	-155.72
459.806	-446.544	-152.607
505.611	37.4353	-151.608
475.949	57.9732	-151.143
430.102	-171.539	-152.083
385.885	13.9389	-153.333
563.081	-3.71221	-149.502
521.373	58.8176	-149.769
459.305	-2.61281	-149.329
464.665	-186.333	-149.798
428.896	-3.70538	-149.526
363.581	127.689	-154.158
417.271	258.158	-152.61
317.853	251.792	-150.718
347.886	192.611	-147.697
322.63	283.351	-149.51
140.679	-266.462	-151.543
269.875	36.2752	-153.569
268.578	71.6668	-152.725
249.619	72.3048	-152.767
218.932	232.324	-152.276
212.066	243.533	-150.388
187.703	197.026	-151.978
289.448	240.213	-147.69
163.263	239.498	-147.765
-234.797	-240.49	-150.844
-227.848	-254.486	-150.094
-246.835	-257.872	-148.257
-206.336	-140.404	-151.025
-308.701	-138.417	-148.806
451.015	27.9164	-145.144
416.733	-10.5194	-146.385
395.415	-171.277	-146.324
325.981	-175.588	-145.582
479.552	188.498	-145.233
419.206	345.476	-144.623
402.301	220.893	-145.013
390.403	224.472	-144.968
334.709	159.937	-145.37
327.999	236.061	-145.684
321.921	202.866	-144.891
305.634	169.016	-144.522
225.789	6.98924	-145.498
198.945	57.794	-145.144
170.704	70.3926	-142.45
294.105	102.157	-144.999
243.739	280.163	-146.813
217.056	102.012	-143.845
203.497	309.406	-145.139
194.673	284.247	-146.698
185.743	131.523	-144.086
296.509	206.769	-142.59
263.953	368.779	-143.358
146.277	135.056	-143.024
133.735	357.173	-142.668
-317.375	-261.412	-138.94
-166.124	-179.926	-144.406
-265.714	71.2995	-144.746
-197.973	-168.909	-143.606
-515.49	-59.2888	-138.94
633.817	18.2194	-78.38
633.022	-150.537	-78.38
576.462	146.835	-75.7363
576.112	93.3866	-71.9695
418.451	-359.236	-78.38
554.305	-430.53	-72.3302
537.589	53.1661	-78.38
459.204	-129.181	-78.38
391.27	-95.5168	-78.38
338.923	66.6812	-78.38
262.052	5.91892	-78.38
517.163	69.4786	-70.651
305.467	52.2158	-71.3474
278.204	-22.0019	-73.4262
477.369	258.96	-78.38
450.972	203.577	-78.38
422.145	230.054	-78.38
381.232	151.864	-78.38
376.517	223.77	-78.38
375.871	195.027	-78.38
369.477	80.6196	-78.38
342.289	207.088	-78.38
292.455	210.077	-78.38
454.713	296.469	-74.7554
432.6	248.776	-74.0473
442.476	303.44	-72.7203
442.338	114.457	-70.5006
428.709	350.602	-72.2603
374.876	323.562	-70.419
359.426	162.988	-71.8867
352.899	253.072	-73.0154
348.633	183.638	-73.1744
425.868	339.487	-69.909
229.021	-69.8397	-78.38
154.761	0.363402	-78.38
116.068	58.8715	-78.38
55.8516	59.1304	-78.38
196.377	-51.2921	-71.8646
94.7354	24.6841	-71.8237
82.0304	-64.5819	-72.9538
233.748	226.941	-78.38
222.88	107.213	-78.38
177.312	327.653	-78.38
168.069	281.43	-78.38
114.461	260.533	-78.38
104.333	316.72	-78.38
80.6193	320.814	-78.38
248.632	184.318	-74.5212
234.277	82.2675	-75.422
81.7216	134.041	-74.2399
217.477	118.265	-69.9791
53.3115	216.669	-69.6044
[truncated: 17 more rows]
