# Supplementary material for: Spinal premotor interneurons controlling antagonistic muscles are spatially intermingled
Source: eLife. 2022 Dec 13;11:e81976. doi: 10.7554/eLife.81976 (PMC9844990; doi:10.7554/eLife.81976)
Supplement: Figure 3—figure supplement 2—source data 5. [file elife-81976-fig3-figsupp2-data5.xlsx]

## Sheet: Sheet1
93.78	60.33	20
-426.2	-146.23	22
-229.08	-238.54	22
61.29	315.51	28
496.99	268.05	26
323.09	116.68	24
394.06	183.59	12
519.5	346.23	6
500.8	290.63	2
703.87	19.26	4
366.37	161.59	4
674.67	-213.64	30
483.19	-11.47	30
542.73	-56.59	26
480.48	-208.88	22
685.88	-245.34	22
469.37	-381.82	12
292.48	-33.41	4
767.35	-191.05	0
-226.36	71.74	262
-324.53	-19.99	258
-208.8	-216.53	230
247	-17.66	240
319.86	212.46	270
160.01	215.99	266
381.56	67.94	266
319.48	77.07	260
218.29	236.59	272
356.42	299.5	266
459.97	-3.25	258
403.33	215.73	250
194.09	211.43	252
173.17	245.48	252
312.74	66.18	250
321.09	5.83	252
585.32	152.61	246
320.99	198.24	242
425.35	147.66	238
225.72	129.01	234
398.4	7.47	240
505.27	55.35	246
617.05	57.26	238
297.41	-3.82	264
475.29	-80.35	264
609.78	-87.58	266
632.01	-127.86	254
619.83	-360.44	238
-256.29	48.78	512
303.53	68.94	512
159.94	374.24	510
437.17	309.31	512
506.93	59.89	506
180.96	268.68	494
394.97	140.09	490
331.75	114.05	484
337.79	212.88	480
-159.09	-193.24	746
433.31	206.07	750
225.91	315.24	738
403.85	242.48	740
388.91	131.2	740
552.61	96.03	734
293.4	188.2	734
333.82	89.11	730
421.01	75.32	728
439.25	10.37	724
547.66	66.8	722
259.68	141.36	728
181.85	273.91	730
556.16	395.29	724
538.67	83.81	716
350.76	217.12	736
541.7	-209.91	710
434.5	-74.29	714
514.56	-104.68	716
514.05	-124.23	720
591.1	-191.11	740
488.36	-161.67	744
-351.36	60.97	8
59.91	29.4	6
-4.47	-108.89	0
477.06	160.86	30
153.24	242.32	30
443.84	124.64	26
165.06	223.48	18
424.76	160.47	16
434.63	221.51	14
275.11	432.93	14
140	166.43	12
378.77	252.36	10
476.28	242.96	10
644.85	34.48	10
481.67	257.74	4
507.85	195.76	0
458.94	218.93	0
392.86	85.49	6
605.02	41.66	14
397.46	87.2	30
329.83	45.33	26
522.59	-123.23	26
535.3	-36.21	28
739.35	-206.48	24
540.91	-222.27	22
421.45	31.66	22
494.87	-110.96	22
355.23	-141.29	18
450.65	-230.17	16
485.89	18.3	4
366.89	52.28	2
334.1	-291.34	20
551.53	-276.01	18
401.6	-294.84	12
496.53	-332.49	2
397.42	-359.46	0
-311.42	-177.99	252
-199.78	-324.12	242
-99.78	-180.47	222
267.35	381.56	252
565.01	387	248
491.65	222.59	244
240.08	337.69	228
568.86	270.43	226
482.8	289.55	220
469.85	263.35	250
453.47	-25.87	252
486.32	-28.62	252
289.74	96.68	252
382.13	83.89	246
222.08	186.45	248
476.7	184.77	242
314.65	31.67	238
523.47	-45.13	234
483.51	-55.59	238
213.36	193.6	228
257.75	146.77	218
228.02	148.51	242
322.07	16.2	252
234.12	128.54	252
600.84	83	224
694.17	-20.49	242
267.97	-71.33	246
443.49	-389.4	248
660.34	-384.43	240
594.71	-213.48	244
527.09	-141.24	240
312.04	-169.84	246
681.75	-274.71	234
525.27	-161.82	226
82.29	25.49	486
-385.04	-233.08	476
408.78	61.52	504
254.53	241.39	504
167.15	376.27	498
303.49	358.54	492
405.32	116.69	490
317.72	13.09	508
533.62	-17.89	512
-203	-234.73	720
192.56	290.2	754
380.92	119.09	742
291.4	89.03	744
505.57	43.3	742
476.65	15.99	746
450.84	4.07	742
604.24	35.83	736
623.41	-32.63	730
663.86	97.35	720
44.56	-223.3	34
-134.32	-186.82	34
-148.34	-131.49	30
-153	-145.63	28
-238.3	-138.5	30
-190.48	-146.93	30
-209.94	-236.73	30
-285.75	-317.51	26
-174.69	-281.87	22
-144.75	-281.89	24
-191.07	-247.04	28
-213.9	-176.69	24
-133.74	-119.73	16
-254.9	-87.89	18
-87.1	-226.24	12
-138.3	-215.28	16
-232.9	-298.05	10
-326.84	-234.46	10
-313.68	-207.27	34
-552.93	12.7	32
-496.27	335.4	10
343.64	97.17	30
287.46	111.48	30
287.35	39.5	28
504.22	140.94	30
342.92	49.97	30
318.97	120.3	28
584.94	113.87	30
477.15	115.53	28
477.22	138.01	26
428.77	128.79	28
344.69	150.3	28
222.87	144.52	30
376.01	219.37	26
275.38	264.72	24
233.83	161.04	26
249.96	142.9	24
262.11	129.83	20
582.99	157.38	24
506.4	159.04	28
547.46	214.75	26
327.05	61.54	18
271.85	188.83	14
274.41	238.23	16
271.53	218.26	18
307.73	255.08	20
332.65	235.35	22
599.42	365.15	20
235.93	356.7	22
457.2	329.68	18
492.44	195.29	12
560.83	183.32	8
525.8	168.06	8
544.98	295.53	8
467.27	252.78	8
306.84	234.02	6
295.76	297.31	8
212.68	245.92	8
259.35	109.47	8
349.38	98.86	8
419.34	112.72	8
452.4	112.02	12
426.1	166.27	12
479.02	83.64	10
487.17	109.74	6
296.94	32.33	8
184.25	252.14	12
442.44	212.65	14
749.55	153.82	12
477.63	315.29	24
327.1	86.92	18
497.55	162.27	16
434.43	573.89	18
167.05	232.01	28
112.05	298.52	24
202.43	151.11	20
180.87	205.63	16
146.34	259.4	12
170.25	243.59	8
82.44	-27.56	16
104.79	15.5	12
377.34	-13.08	14
382.4	-30.36	10
377.41	5.7	8
450.52	-3.29	10
429.63	-27.16	8
157.33	100.88	10
135.68	110.75	12
120.43	34.79	14
165.57	69.32	14
192.07	170.89	12
167.89	179.01	10
100.79	158.83	10
211.89	98.11	12
151.3	-60.1	24
429.18	-10.05	26
217.11	68.21	26
208.99	111.46	26
278.09	-3.15	22
242.02	138.89	18
489.98	40.23	18
615.18	55.41	30
376.67	-214.56	26
520.31	-193.96	24
486.36	-57.89	30
392.49	-127.99	30
480.63	-32.11	26
561.24	-5.73	24
635.74	66.47	26
311.26	-57.06	22
582.3	-266.41	22
399.41	-204.69	24
554.91	-144.9	22
463.27	-111.81	20
429.21	5.91	18
539.16	63.33	16
670.64	9.88	18
564.8	11.8	20
553.76	55.71	20
479.46	-167.03	16
528.7	-211.64	16
476.57	-272.7	14
629.09	-35.72	16
656.57	46.95	14
590.95	35.03	12
520.93	-161.73	8
313.8	-82.86	8
713.76	-12.27	6
698.17	-123.03	6
455.87	-36.62	24
503.24	-151.36	28
530.57	-255.49	30
437.86	-198.45	26
453.22	-211.8	28
305.03	-106.03	14
523.22	-461.72	28
401.03	-387.5	28
513.74	-360.42	22
605.38	-301.06	20
646.11	-459.16	18
774.87	-226.83	12
502.64	-454.83	24
478.43	-423.14	6
520.59	-478.73	16
453.46	-382.07	10
-480.73	352.95	266
-81.26	50.65	248
-282.88	-169.15	270
-152.16	-285.44	266
-8.37	-159.44	258
-262.67	-301.34	258
-166.47	-243.51	254
-280.89	-292.72	252
-140.15	-211.05	248
-294.89	-186.54	236
-71.63	-123.62	238
-100.53	33.58	268
-206.53	-290.32	252
678.28	-384.76	244
671.89	-319.47	246
373.73	-380.93	246
436.71	-338.82	254
394.63	-309.24	254
559.14	-304.88	254
597.08	-280.65	250
510.95	-439.96	266
555.98	-129.38	272
312.82	-21.78	272
659.88	148.71	272
382.14	-39.21	270
428.97	16.74	268
401.05	60.13	266
344.99	34.4	262
318.41	59.97	266
376.54	156.28	266
415.72	161.69	270
364.74	176.58	266
499.45	174.37	266
479.51	123.25	270
571.42	117.38	268
608.71	156.83	262
695.05	138.38	260
237.09	139.85	268
769.49	-111.72	244
546.77	-111.53	238
728.05	-112.94	238
486.6	-107.46	246
459.99	-187.61	246
721.14	-156.63	258
515.07	-69.23	260
602.66	-56.01	264
581.42	-48.82	264
721.65	-115.51	260
625.53	-6.97	256
419.23	-49.06	256
406.95	-91.58	256
402.63	-31.5	250
584.09	1.49	248
504.28	-40.72	236
452.58	-19.5	238
220.75	-92.33	238
278.94	-119.46	260
418.14	-35.03	262
403.5	-39.88	236
201.83	348.84	238
202.95	266.76	240
176.74	251.24	242
209.79	118.55	244
151.41	138.85	244
178.61	159.62	244
280.98	-15.11	236
301.8	18.96	238
323.05	25.29	238
302.97	63.92	240
386.3	60.11	238
410.88	1.12	238
389.31	276.6	246
355.08	212.33	246
376.21	227.72	252
246.83	203.63	254
247.74	246.29	252
204.8	220.51	252
93.19	158.04	254
294.24	349.12	250
146.75	345.21	254
119.89	293.3	252
143.34	111.08	252
308.31	218.35	270
209.78	283.02	270
221.09	238.07	270
185.85	263.27	270
186.35	234.98	270
235.16	156.65	260
222.94	142.48	260
214.65	103.91	262
101.12	121.14	256
192.35	142.23	256
113.31	45.12	248
219.33	86.41	268
372.13	121.67	250
335.42	153.47	248
373.94	34.59	246
299.93	451.7	254
342.16	326.53	256
527.48	292.55	242
519.18	336.21	256
460.87	302.64	266
610.96	587.64	280
429.43	250.95	246
429.28	235.61	238
501.92	190.06	244
494.74	217.43	254
525.24	197.81	256
535.4	144.77	252
590.55	147.85	252
520.59	223.26	262
557.71	241.99	266
596.27	65.27	240
516.5	47.45	246
544.5	21.26	250
408.81	125.03	252
448.27	118.57	250
563.41	-12.99	260
632.74	47.62	240
555.48	23.91	258
661.86	206.46	258
627.81	-328.24	238
663.45	-360.56	238
-483.19	422.07	514
-220.55	-291.32	520
-358.42	-292.91	536
-414.24	-48.73	540
-155.98	-217.49	548
-248.52	-252.14	550
-285.99	-245.94	528
-181.27	-202.29	538
-488.89	-1.6	536
420.83	370.59	556
381.27	339.79	556
377.17	252.62	556
372.36	109.87	556
386.26	295.26	554
283.03	213.62	554
88.35	149.48	550
53.49	138.64	556
286.17	266.01	548
227.44	307.29	536
148.26	227.65	536
367.15	218.2	530
447.74	254.29	524
447	229.92	524
494.66	157.57	524
562.51	140.2	524
427.54	118.83	526
199.82	287.54	526
195.53	387.65	532
420.64	483.65	540
329.03	193.11	532
564.5	277.09	528
364	246.29	544
225.87	197.5	544
441.51	316.02	544
563.63	161.14	544
421.27	150.04	544
280.41	162.69	536
306.08	156.55	538
361.16	191.17	538
264.97	151.94	538
734.56	301.01	546
642.35	232.4	536
575.79	176.38	536
512.79	138.1	536
450.54	111.69	536
373.33	286.88	530
168.81	44.38	530
665.64	129.91	522
577.36	94.35	526
368.49	57.75	524
300.39	95.9	524
247.58	65.7	554
483.34	85.2	554
547.82	97.97	554
628.33	54.28	554
636.23	76.67	552
587.17	31.62	554
526.37	-156.25	554
500.04	-94.69	554
605.47	-82.18	554
450.12	-39.24	554
297.83	63.01	550
623.3	-12.19	548
468.67	-6.63	550
379.96	-69.3	544
402.62	-42.48	522
617.39	34.32	524
458.97	-136.75	528
495.47	-319.97	528
442.02	-4.07	532
394.97	-85.66	532
530.34	-92.68	532
550.51	-6.48	534
460.74	-72.04	540
409.66	-0.07	542
648.53	35.03	540
643.28	-283.28	548
511.46	-246.03	536
606.56	-95.62	556
459.49	-360.52	524
99.44	127.44	520
-353.97	-213.67	520
-238.56	153.85	520
-186.64	-233.57	520
-247.13	-159.98	520
-245.84	-211.34	520
-161.28	-152.42	520
-162.79	-131.45	520
-344.34	-302.59	520
-194.62	-218.41	520
308.42	58.93	522
430.35	-286.02	518
604.69	-62.69	516
468.41	-355.39	514
535.47	-37.82	506
400.51	1.55	506
329.94	26.87	504
428.8	-152.1	494
239.88	-5.96	508
409.37	147.31	504
567.67	-234.53	500
584.79	-160.69	500
368.55	73.12	492
559.47	-18.15	490
407.05	-54.59	514
420.55	-71.82	500
333.32	231.12	494
209.67	377.09	512
237.49	117.63	508
-339.51	19.17	750
-332.32	-177.35	748
-260.25	-96.37	748
-267.45	-118.27	744
-232.38	-172.49	740
-387.42	-182.3	738
-271.64	-213.29	736
-216.45	-156.03	730
-248.94	-261.61	734
-172.62	-174.36	742
-146.54	-94.01	742
-237.39	-233.87	742
-122.97	-185.63	726
-381.5	-202.01	722
-513.77	338.79	750
85.44	95.31	752
479.43	154.49	748
485.04	297.27	750
187.25	65.9	750
234.93	138.27	746
280.58	174.55	744
329.58	245.33	748
273.41	103.57	746
331.01	115.11	742
416.52	90.44	738
374.57	154.24	734
295.83	202.8	734
339.12	224.77	736
544.55	123.64	730
389.22	130.12	728
378.01	237.17	728
217.9	74.95	730
290.19	100.84	736
258.37	288.05	736
-24.28	270.52	730
441.2	326.45	730
283.78	85.58	726
209.82	374.05	724
573.35	122.29	722
528.56	169.76	720
393.72	245.11	720
323.34	233.43	722
593.81	67.28	720
523.31	41.85	722
450.7	-42.89	722
439.03	-15.7	724
530.06	-38.33	732
533.24	-60.52	740
502.63	-70.32	742
534.18	69.31	744
514.19	41.05	748
635.24	10.81	748
543.71	131.02	742
372.47	54.51	740
507.73	-243.16	722
480.9	-156.45	718
388.59	-167.32	722
653.67	-223.86	730
568.51	-274.83	730
552.14	-150.82	726
485.6	-192.73	730
384.03	-131.63	742
517.16	-96.49	744
365.63	-23.03	734
358.85	-251.99	740
313.47	-44.89	748
324.16	-218.82	750
582.12	123.96	330
103.75	2.44	330
519.65	277.29	328
538.32	174.78	328
258.77	54.03	328
229.61	117.95	328
205.16	76.33	328
347.66	35.98	328
479.65	70.57	328
529.76	83.47	326
194.05	162.74	322
194.14	272.32	322
346.73	249.57	322
92.59	169.18	322
257.87	102.9	322
416.71	72.61	322
464.96	98.55	324
447.33	106.71	316
423.31	204.53	316
274.92	207.95	316
178.29	203.32	316
419.86	96.09	312
354.98	134.38	312
428.6	123.19	312
533.53	194.12	312
216.86	479.35	308
200.29	223.64	302
193.93	57.8	298
480.25	132.86	298
461.4	136.02	298
431.9	173.35	300
388.71	158.77	300
436.25	227.58	302
546.33	191.92	300
328.55	40.4	300
609.17	137.04	320
572.96	254.24	318
369.45	107.37	302
299.15	75.03	312
292.51	70.45	294
195.97	119.48	302
145.33	99.48	298
678.19	-150.89	332
560.12	1.65	332
445.07	-9.14	332
612.13	11.75	330
436.63	-23.54	324
322.64	-67.21	324
306.69	10.34	322
381.97	-247.21	322
679.48	-77.94	320
466.47	-39.45	320
484.15	-56.9	320
346.7	-31.69	320
602.63	61.12	318
389.02	-79.17	318
474.71	-19.8	318
254.74	-14.53	316
428.12	1.22	316
381.74	-278.48	316
463.85	-166.87	316
475.92	-127.01	314
520.41	-124.73	310
506.33	-128.82	310
319.85	-220.73	302
412.03	-160.81	300
371.27	-42.31	300
508.51	-321.66	298
535.57	-57.92	296
524.28	49.68	294
617.59	79.4	294
537.05	56.04	310
359.83	-296.78	304
420.77	-67.31	310
493.78	-78.67	314
537.88	-411.58	320
-534.89	16.64	308
-173.56	-145.23	330
-79.09	-206.31	328
-209.1	-228.77	326
-327.05	-230.17	328
-373.36	-248.28	328
-204.56	-321.21	322
-118.43	-305.02	314
-274.34	-207.85	312
-195.12	-244.64	298
517.5	9.29	302
-150.87	-167.42	796
-131.44	101.1	796
-223.58	98.01	782
-270.43	-273.7	782
110.57	27.08	782
311.32	332.44	776
318.5	107.9	776
495.79	-79.3	776
591.94	-4.75	776
199.97	257.77	798
494.15	14.79	798
521.46	-26.34	794
356.78	55.9	788
273.41	17.91	788
282.25	-3.41	788
475.72	-78.38	788
192.78	80.42	788
179.61	269.65	788
501.36	66.6	786
267.7	92.5	784
339.1	52.25	784
304.16	219.68	778
572.26	152.32	310
481.03	217.2	308
454.73	225.12	306
413.5	125.53	302
383.43	152.61	298
372.77	144.52	300
337.64	99.46	302
355.19	85.53	300
466.71	266.24	292
450.02	201.95	288
490.87	196.29	286
367.68	236.56	288
476.39	159.4	284
451.7	103.45	282
487.03	94.56	282
423.2	198.19	282
522.43	222.89	282
466.62	325.51	284
476.37	306.93	276
393.39	234.94	280
243.95	240.86	312
234.14	148.21	298
157.34	304.2	284
228.31	98.27	276
242.8	128.54	286
366.88	75.77	308
451.9	60.28	304
541.37	5.65	304
384.26	35.36	300
271.9	-58.97	298
444.64	45.33	300
545.03	-162.97	294
679.88	-102.77	288
651.69	97.39	294
357.22	14.59	292
482.74	-143.7	282
665.78	-382.27	306
493.05	-382.97	308
518.15	-382.53	316
448.65	-313.82	290
-239.05	-96.09	762
-247.37	-224.73	784
-287.41	-152.46	786
-280.51	145.91	786
189.88	120.88	786
288.16	78.05	770
300.58	143.83	766
287.6	68.65	758
225.64	191.82	756
374.77	322.78	788
148.23	339.58	776
83.27	316.82	768
529.05	154.14	788
430.52	248.04	774
395.11	288.34	758
373	136.56	760
402.68	137.6	770
395.36	125.25	770
510.32	192.13	768
799.21	49.15	774
532.81	18.27	782
579.15	50.43	786
379.87	37.1	770
326.11	90.06	782
710.43	-84.66	784
510.77	-87.36	784
676.32	-74.97	764
626.04	-62.31	760
787.26	-72.26	756
793.58	-179.37	758
-536.99	340.59	254
-237.51	-173.01	252
-296.76	-110.78	256
-309.49	-219.03	258
-295.21	-58.04	260
-392.15	35.75	262
-379.32	-4.59	262
-195.15	-167.92	260
-176.87	-177.51	258
-151.45	-188.17	254
-337.75	-243.78	258
-390.69	-176.21	268
-219.23	-209.12	266
-191.36	-154.91	278
-396.14	-279	278
-373.54	-218.98	282
9.32	-60.38	284
488.22	602.07	290
547.75	506.33	288
336.97	413.63	284
507.59	525.57	282
106.48	371.22	280
125.64	540.05	282
503.14	303.06	278
413.9	322.37	276
345.08	356.36	274
418.91	276.14	272
501.49	241.23	272
427.96	306.77	264
331.47	248.78	262
472.14	248.81	260
543.41	307.83	258
454.98	345.78	258
219.79	557.92	264
521.29	541.55	262
479.1	220.83	262
262.96	226.66	256
308.3	205.38	252
198.16	230.1	250
232.9	297.39	250
208.33	194.37	250
371.71	266.09	252
470.02	264.89	250
348.51	227.04	246
271.91	270.37	244
261.04	232.95	240
391.46	211.45	252
719.25	351.21	242
218.26	193.5	266
524.93	245.42	266
409.74	31.89	278
460.25	11.03	274
216.21	103.07	274
297.46	106.91	272
373.68	50.6	268
384.59	20.07	264
494.43	70.99	266
522.31	105.02	264
455.93	-63.6	264
501.87	-71.29	270
549.36	-50.86	272
569.72	-30.37	272
500.16	-46.02	274
527.42	-37.97	276
161.08	-64.87	272
82.38	10.13	268
147.81	47.91	264
217.27	116.56	262
232.25	122.59	266
331.36	119.88	268
470.94	209.13	270
510.16	215.52	272
443.08	156.48	262
497.76	143.87	260
542.2	86.19	258
358.14	67.17	256
227.06	103.69	254
226.26	177.24	258
337.29	74.94	260
320.29	108.71	258
273.06	86.29	256
379.79	-20.22	258
213.94	144.86	254
164.88	120.98	254
59.54	75.92	244
330.11	83.3	244
264.19	132.06	248
203.65	164.54	240
386.82	79.85	244
330.97	168.8	246
468.23	67.12	250
517.2	-6.54	248
453.12	-8.52	248
346.7	52.71	246
483.86	181.69	248
508.97	199.98	246
496.99	161.98	244
445.79	197.31	244
329.46	186.41	252
402.89	181.94	256
464.54	-33.73	254
419.8	-41.25	252
415.24	-64.92	262
599.85	89.32	276
653.39	60.71	268
633.33	56.18	264
576.17	66.01	264
570.21	118.27	266
683.36	-17.02	266
634.24	209.34	256
640.11	161.29	254
627.02	50.65	252
680.33	37.97	248
476.96	-114.21	248
700.97	-8.13	258
473.23	-436.29	286
579.35	-111.76	276
490.22	-297.21	274
541.71	-262.65	260
481.46	-223.13	260
422.58	-239.99	262
587.92	-111.64	256
742.92	-142.18	238
568.74	-356.53	248
-146.73	88.61	766
98.43	211.06	768
-315.14	251.51	764
-219.66	367.39	760
-435.76	363.61	748
87.99	161.71	742
-99.55	61.68	744
-288.28	374.99	740
-226.59	140.13	734
-484.7	189.2	736
-218.3	-154.1	756
-279.33	17.65	744
-250.11	-22.8	744
-182.88	-140.46	742
-190.76	-121.53	740
-333.44	-234.35	738
-269.66	-201.32	732
111.88	184.84	770
356.85	200.83	770
270.87	197.35	766
225.54	333.01	764
516.09	69.77	770
247.91	374.93	760
334.89	201.77	756
488.81	118.4	752
294.03	209.23	756
584.24	91.73	758
255.99	107.83	750
278	220.05	748
458.35	278.98	744
441.63	204.93	744
303.45	117.08	742
105.77	155.04	744
490.72	63.02	740
474.4	141.97	740
97	13.57	754
737.08	136.35	766
675.86	13.96	744
570.04	32.19	746
579.59	-45.72	772
537.01	-56.66	766
451.78	-38.56	766
498.05	-236.22	758
607.31	-280.33	752
561.42	-21.08	752
547.25	-20.1	748
393.06	30.83	748
407.79	-50.14	742
431.76	-119.57	738
399.75	-21.92	744
542.95	7.09	740
507.31	-267.67	738
221.03	57.28	736
450.22	-329.89	756
244.36	-249.06	766
-19.7125	-88.0551	6.16718
-9.58494	-61.7875	10.3039
155.414	-5.23706	3.18553
178.158	-7.5313	4.5861
130.052	95.9966	7.30132
288.825	159.017	6.77933
286.602	4.34628	7.9984
260.042	191.173	9.64883
336.354	181.733	9.72222
329.662	-192.205	8.00249
423.437	260.421	10.596
434.543	163.923	3.81586
423.477	45.6542	6.66151
372.384	-66.7569	8.65658
459.628	156.931	8.62158
164.258	267.089	13.2585
124.3	35.4282	15.4644
332.908	157.824	18.07
398.775	220.032	13.2368
562.403	195.473	18.07
83.797	308.62	86.5818
271.319	207.525	87.0277
293.068	271.254	85.7396
64.225	261.383	89.9583
236.676	274.922	88.543
300.346	213.099	90.3774
215.236	148.429	83.0446
249.903	151.837	88.2727
207.424	125.621	89.6393
389.133	241.899	85.5431
407.086	167.79	85.9572
469.385	182.765	89.2502
316.591	-111.87	87.6587
354.387	-2.69742	86.9475
319.23	38.5204	90.2011
407.612	-345.926	90.7194
-303.313	-228.006	92.539
298.103	291.074	93.7108
207.825	310.573	95.7454
-181.644	-20.4586	161.39
-45.0297	-2.92629	161.39
-240.424	-188.21	161.39
-127.925	-120.136	161.39
-75.6591	-160.268	170.62
167.791	290.788	161.39
289.83	236.085	161.39
339.94	207.333	161.39
46.6924	5.70792	161.39
126.74	41.8757	161.39
215.417	82.3191	161.39
318.081	178.667	161.39
122.062	201.453	163.557
222.902	-103.189	162.835
363.491	255.099	167.804
368.959	133.656	161.39
492.16	57.8617	167.764
521.687	18.0976	169.135
591.772	-329.92	161.39
338.027	-354.652	170.028
439.016	-352.175	169.127
-289.469	-219.661	171.467
-10.4284	-58.6226	243.763
347.218	286.78	241.39
356.882	249.476	241.39
145.553	213.7	242.85
45.598	41.238	241.39
112.283	129.346	245.376
211.482	191.039	244.591
315.742	147.849	245.52
97.3718	21.5292	246.955
167.437	138.266	249.228
442.207	174.533	248.014
452.068	-110.478	247.168
539.283	37.5188	251.036
425.299	-139.779	244.28
367.254	-302.882	248.056
486.687	-403.159	247.559
511.683	-422.341	246.777
467.453	-157.329	248.824
-102.379	-176.585	255.43
57.1744	209.05	252.782
224.27	-18.1387	253.02
-269.857	134.393	323.796
-233.599	-208.296	327.757
241.378	245.178	321.39
74.27	-12.6486	321.39
117.155	54.6103	321.39
123.024	38.1718	321.39
207.848	156.725	321.39
173.347	51.4575	323.712
72.142	27.3973	327.085
158.483	106.78	325.894
326.293	246.808	321.39
488.605	363.29	324.19
299.3	132.008	321.39
307.808	17.8965	321.39
341.186	85.2253	321.39
360.605	172.1	321.39
487.107	-36.1594	321.39
489.586	49.2724	321.39
508.879	57.1412	321.39
335.387	-57.1726	326.479
406.253	64.1068	327.565
446.454	24.8025	327.136
306.42	-301.565	324.679
437.01	-301.763	327.359
372.055	-287.957	329.675
611.128	101.636	327.088
-111.27	-236.318	401.39
-287.378	-278.6	405.948
139.762	251.534	401.39
9.81353	-71.5233	401.39
57.1098	27.2948	401.39
253.194	154.181	401.39
272.762	63.8725	401.39
294.355	201.263	401.39
303.863	175.052	401.39
309.741	-17.1413	401.39
68.6533	88.6626	403.898
84.9974	48.0392	403.858
149.733	8.28733	403.693
228.682	-364.906	401.39
481.923	228.754	401.39
368.413	105.58	401.39
397.796	23.3313	401.39
518.769	13.9392	401.39
345.439	219.168	404.131
351.316	-206.757	401.39
-138.755	38.4449	481.39
-218.876	-151.905	481.39
-210.929	-287.099	481.39
-196.925	-139.796	481.39
-170.276	-253.728	481.39
-136.017	-274.53	481.39
-122.065	-163.873	481.39
110.088	211.827	481.39
200.115	126.665	481.39
252.092	131.55	481.39
274.178	117.637	481.39
299.369	177.92	481.39
319.085	200.736	481.39
96.3225	-206.841	481.39
205.473	-319.722	481.39
212.436	-299.339	481.39
329.695	-64.7817	481.39
376.028	269.972	481.39
348.017	233.307	481.39
355.626	45.3817	481.39
387.84	92.9207	481.39
524.785	199.011	481.39
384.865	-143.121	481.39
505.369	-81.3449	481.39
-139.98	-16.9673	561.39
-123.433	-33.2516	561.39
161.139	221.064	561.39
201.282	270.84	561.39
11.381	79.9134	561.39
82.8792	4.90403	561.39
120.542	121.367	561.39
144.101	21.7797	561.39
172.118	188.51	561.39
176.876	155.959	561.39
181.663	-86.2849	561.39
-70.9147	-245.839	561.39
204.96	-315.78	561.39
207.337	-180.634	561.39
256.474	240.727	561.39
331.816	284.577	561.39
366.667	257.014	561.39
371.56	233.94	561.39
449.194	251.015	561.39
456.27	333.187	561.39
244.703	164.473	561.39
263.047	132.446	561.39
325.535	124.451	561.39
382.462	-91.0521	561.39
451.161	74.0698	561.39
263.508	-356.212	561.39
395.82	-426.322	561.39
401.164	-260.682	561.39
573.299	113.253	561.39
-75.693	-35.5439	647.985
-307.679	-310.167	648.144
-219.951	-267.965	649.688
167.012	325.098	647.533
172.256	65.3778	641.39
72.745	37.6315	649.847
192.599	102.151	649.209
231.382	85.4121	650.405
376.964	160.391	642.941
293.895	158.467	647.759
323.566	212.956	649.177
342.91	65.9816	641.39
577.358	28.0016	641.39
384.646	-85.4208	643.962
391.579	98.6085	647.005
409.793	-292.833	647.975
639.452	-394.607	641.39
666.935	-381.339	643.492
317.843	257.242	651.128
408.16	235.529	651.78
540.305	177.546	651.559
310.871	-229.314	652.189
460.7	-403.468	651.721
-283.294	-5.24345	727.255
-264.52	39.2588	725.942
-208.648	-178.796	730.546
217.036	269.126	727.554
332.543	192.387	728.213
158.295	276.952	729.814
292.306	144.969	728.225
318.229	-357.477	729.873
422.994	-247.059	730.013
470.805	175.423	734.558
460.61	-361.54	731.412
629.883	-358.541	732.465
122.3	234.858	1.39001
191.929	142.74	9.73
219.118	77.905	9.73
158.331	76.3509	4.17
37.9737	72.0138	4.17
250.783	12.6909	1.39
308.703	117.496	1.39
349.477	125.689	12.51
410.06	38.1626	15.29
521.336	20.2883	9.73
574.029	-127.114	4.17
484.344	-178.381	12.51
406.215	-201.07	9.72999
200.104	-65.3502	4.17
248.088	-66.2855	12.51
-127.425	-158.284	12.51
519.939	-453.941	9.72999
570.953	-265.28	15.29
336.246	197.81	86.95
284.937	136.953	86.95
351.737	67.8077	84.17
491.164	109.352	89.73
429.309	6.71736	86.95
536.573	-36.2515	92.51
376.607	-99.1847	84.17
414.748	-104.711	89.73
210.193	245.625	84.17
145.858	55.8499	86.95
130.69	91.7402	92.51
21.0488	57.1964	81.39
134.705	-117.871	81.39
-108.12	-186.848	92.51
-241.044	-201.215	89.73
-90.7527	-72.6926	92.51
402.959	-391.568	89.73
366.265	183.968	172.51
210.949	165.056	164.17
207.923	87.8316	161.39
175.989	63.3634	166.95
274.803	1.39712	172.51
340.791	60.2487	166.95
442.78	48.8128	166.95
404.224	183.521	175.29
286.621	240.822	161.39
317.954	289.194	166.95
407.333	279.7	169.73
317.155	-321.568	164.17
415.905	-426.555	164.17
464.11	-381.586	166.95
577.24	-290.034	169.73
-145.956	-121.868	172.51
385.583	-200.695	161.39
346.735	101.189	246.95
363.237	43.1597	249.73
395.624	-18.4222	249.73
483.804	-119.096	244.17
538.845	-345.389	249.73
50.7885	31.9413	244.17
188.805	202.243	246.95
261.084	184.45	241.39
201.559	146.391	244.17
211.558	133.73	241.39
257.356	94.0683	241.39
-238.782	-183.706	246.95
-173.664	-200.966	252.51
353.695	163.685	326.951
311.055	171.308	324.171
293.842	149.337	326.951
241.787	154.662	332.511
126.78	196.226	321.391
162.246	233.17	332.511
310.687	303.965	332.511
220.649	230.984	321.391
49.3124	120.232	329.731
89.7229	20.331	321.391
77.2018	-1.16989	321.391
9.84476	-81.7036	329.731
191.235	75.8581	326.951
226.777	42.1432	326.951
217.374	-29.646	329.731
505.77	70.97	326.951
670.413	-81.9335	326.951
711.361	-169.642	326.951
510.516	-196.935	324.171
445.311	-246.125	324.171
501.817	-405.34	324.171
411.801	-225.983	324.171
457.118	-125.927	332.511
228.069	-113.994	321.391
389.442	131.069	329.731
-26.923	-55.5031	400.784
161.406	247.647	398.004
269.232	213.225	398.004
271.905	160.636	395.224
306.576	153.681	398.004
384.402	41.0616	398.004
374.195	32.6414	395.224
417.984	-48.6573	398.004
259.937	61.3993	400.784
319.594	-249.367	395.224
130.535	-43.0485	395.224
151.195	65.1978	395.224
2.47888	55.9021	395.224
256.136	-415.351	395.224
411.537	50.3593	395.224
249.61	-39.692	395.224
287.456	-32.7695	395.224
118.256	121.103	395.224
61.7172	66.8234	398.004
83.1885	17.5526	398.004
131.08	17.637	395.224
391.339	113.709	486.95
393.126	95.57	489.73
328.771	161.189	495.29
171.752	283.582	492.51
113.606	170.084	486.95
155.36	120.081	484.17
325.321	-272.606	490.034
282.497	-102.065	492.51
462.08	-423.761	489.76
109.997	13.1131	489.73
124.2	21.697	486.95
233.719	-1.668	492.51
-112.245	24.4864	482.875
324.451	110.03	575.29
396.648	45.1713	575.29
379.101	117.244	578.07
289.12	45.2478	566.95
517.776	-20.3888	576.01
246.058	-99.5209	578.07
170.588	214.489	575.29
264.907	159.173	578.07
278.88	165.872	578.07
288	77.7976	566.95
379.251	-41.8588	578.07
277.608	-32.7629	569.73
260.171	141.998	575.29
268.205	132.241	566.95
279.115	135.004	569.73
206.461	128.1	572.51
-204.562	-238.359	568.623
-168.321	-103.391	649.73
-97.5835	-4.58157	646.95
92.3229	-11.4116	646.95
75.9027	-31.9337	652.51
266.357	149.601	649.73
129.839	30.0913	652.51
352.977	57.4245	649.73
335.376	120.576	658.07
487.571	7.58884	652.447
88.6876	55.8449	649.73
153.54	-56.8612	649.73
-165.846	-12.3368	646.95
-363.452	-34.6321	721.816
-136.405	-158.059	721.434
407.059	-450.849	726.007
442.847	-107.36	729.729
498.935	-83.819	732.51
482.78	59.6192	726.949
425.281	51.9631	729.729
293.218	46.2918	724.169
258.409	153.42	724.169
178.409	383.309	727.261
224.841	233.818	725.329
296.82	179.381	729.729
216.656	116.481	729.729
235.417	30.8508	735.289
118.579	140.67	729.729
-197.647	85.684	730.02
642.236	23.3579	1.62
637.419	-54.1007	1.62
610.56	-46.1028	1.62
577.623	-158.113	1.62
554.354	-245.294	1.62
524.064	-419.59	8.3487
374.803	-254.122	8.54027
542.181	-314.838	10.3179
515.165	-166.261	1.62
455.169	-57.8767	1.62
411.559	34.9455	1.62
360.032	-67.6639	1.62
499.678	43.0007	3.42185
310.993	25.1508	6.01117
453.086	108.537	8.28251
388.384	42.3994	7.92492
268.828	-9.5888	8.84821
443.469	-102.289	12.0344
373.277	-4.68219	10.3719
415.982	271.669	1.62
315.148	150.755	1.62
235.002	126.653	1.62
439.681	286.599	5.02926
402.107	380.48	4.50252
337.108	171.873	6.77707
321.632	284.095	8.22233
235.97	294.072	9.21648
452.835	218.07	11.9567
252.443	287.507	9.92066
205.644	3.18671	1.62
81.2302	15.3349	8.66039
98.743	-9.92088	12.9388
63.676	-9.70628	11.4308
194.009	120.875	1.62
-63.6909	198.423	1.62
116.909	273.093	4.65867
91.6311	246.052	5.77366
197.683	244.728	9.28197
128.41	254.286	7.78438
112.39	322.575	8.47286
67.9607	123.33	7.63733
-141.644	-115.715	1.62
-149.853	-131.9	1.62
-148.474	-219.504	1.62
-174.085	-8.33354	1.62
-181.696	-186.545	1.62
-212.861	-24.4388	1.62
-279.986	12.0684	1.62
-166.95	-128.757	8.54203
-169.081	-204.458	10.5131
-226.026	-195.757	12.0731
-632.243	-61.2268	1.62
-418.931	-174.211	5.66144
568.099	-44.047	81.62
573.029	-195.673	81.62
649.766	-125.281	85.0939
573.295	-59.2618	92.3657
322.495	-298.184	81.62
476.734	-388.341	83.9785
505.685	-48.1423	81.62
495.712	-24.8638	81.62
494.933	-74.3595	81.62
457.454	76.9085	81.62
445.172	14.1226	81.62
398.569	-16.0106	81.62
254.069	10.9518	81.62
538.251	-47.4853	86.3721
450.815	-221.995	87.918
418.961	34.5381	89.1118
374.464	-77.0909	87.9451
309.432	11.5068	89.6181
285.638	2.72116	86.6257
483.336	247.744	81.62
358.946	244.975	81.62
352.146	222.683	81.62
335.805	105.045	81.62
321.009	198.492	81.62
300.514	281.532	81.62
417.021	132.82	83.9949
338.815	254.169	85.3884
299.863	165.052	84.6412
426.039	272.985	89.0437
427.218	192.202	89.1854
371.905	201.673	87.7953
250.898	91.1681	89.155
225.309	30.7303	81.62
225.613	-88.1627	81.62
219.638	48.4625	81.62
192.183	21.9233	81.62
172.705	16.7464	81.62
140.382	27.3955	81.62
129.613	18.1276	81.62
109.424	41.2335	81.62
106.484	-24.4307	81.62
96.743	1.10967	81.62
-75.7186	-144.047	81.62
90.0395	68.1133	84.9591
120.051	53.0528	87.5614
222.094	147.424	81.62
145.272	252.248	81.62
144.295	276.443	81.62
84.9747	283.091	81.62
215.458	98.1994	84.7416
124.129	95.8392	85.5091
-237.725	-213.519	81.62
-266.596	56.5271	81.62
-259.303	-146.099	81.62
-140.434	-128.267	84.0235
-130.295	-172.97	86.9997
-165.627	-17.2351	88.023
-211.403	-10.822	86.9707
-257.148	-255.356	88.0457
-163.079	-163.524	91.4884
-323.428	-253.968	90.7858
648.69	-331.979	161.62
566.909	48.4683	166.717
566.648	158.597	161.62
468.904	-340.571	161.62
503.611	3.67183	161.62
488.347	-21.2442	161.62
457.363	-113.933	161.62
450.691	91.9436	161.62
424.61	103.751	161.62
406.727	100.705	161.62
407.955	-24.8421	161.62
405.017	50.1941	161.62
375.377	79.357	161.62
350.36	-107.868	161.62
349.779	-65.1858	161.62
349.026	-90.3093	161.62
338.465	-66.086	161.62
337.136	-79.8475	161.62
327.662	-126.278	161.62
322.597	56.7003	161.62
317.965	-103.38	161.62
263.6	-14.6492	161.62
217.014	101.23	161.62
410.56	29.8686	163.253
380.857	-162.536	163.324
372.431	6.18204	166.044
251.78	-58.2137	164.455
327.031	-207.775	167.075
400.769	229.058	161.62
385.502	184.541	161.62
381.03	148.963	161.62
374.577	257.502	161.62
276.809	174.854	161.62
255.969	262.758	161.62
525.22	233.762	165.295
456.266	164.147	167.362
206.703	-32.9918	161.62
196.687	101.823	161.62
187.395	-31.4535	161.62
184.038	-133.509	161.62
170.576	-17.8215	161.62
142.19	-94.1748	161.62
130.208	-4.89151	161.62
107.005	-30.5128	161.62
107.158	-91.8811	161.62
101.103	-180.251	161.62
94.1178	-3.77332	161.62
65.0728	-208.849	161.62
196.361	-2.25313	163.53
189.216	-81.6419	165.718
130.575	-127.512	165.557
122.128	88.5799	165.898
82.2518	-23.1558	165.067
77.1706	5.19092	168.036
75.7625	-9.41954	167.952
190.841	113.62	161.62
149.02	188.926	161.62
145.765	281.648	161.62
127.787	237.9	161.62
99.2878	255.676	161.62
93.0316	109.891	161.62
116.826	257.38	165.539
155.221	170.032	166.649
131.3	102.994	166.877
-151.534	-278.784	161.62
-297.907	-232.738	167.41
-102.442	-30.0106	161.62
-123.129	17.9999	161.62
-189.223	-206.754	161.62
-215.435	-137.374	161.62
-217.438	-203.597	161.62
-463.53	2.86125	161.62
656.86	-88.8406	243.511
566.139	-21.9626	244.333
574.361	-77.4986	249.383
536.222	-24.4363	248.288
506.601	-295.701	242.8
479.543	-290.002	242.926
510.991	25.2572	236.751
492.542	26.7291	236.882
453.349	-170.745	240.918
443.042	-176.363	241.112
415.232	-14.3002	238.316
342.647	-103.753	240.616
331.456	-114.472	240.913
251.054	-160.49	242.466
515.869	-203.486	244.889
485.986	14.9671	238.983
243.54	-81.129	247.137
376.27	-78.0376	250.023
214.74	25.9022	249.835
282.796	146.406	236.446
282.207	100.911	245.141
258.243	92.2108	245.134
425.029	118.357	244.017
376.536	201.916	245.536
339.974	120.788	245.242
298.746	119.295	245.192
280.628	127.039	246.117
70.6127	-38.291	241.73
-75.5958	-89.3711	248.647
190.142	-67.2788	246.399
134.658	-74.0331	251.224
134.12	-53.926	250.641
60.3293	-78.3835	251.407
49.3066	72.7724	239.833
170.325	195.962	242.669
150.137	107.474	244.465
105.976	152.062	242.96
-132.912	9.8173	242.58
-126.908	-243.378	247.27
-154.158	-204.384	246.774
-198.922	-270.081	248.39
-208.033	-134.502	245.929
-295.796	-220.541	248.295
-443.933	197.712	250.122
568.211	190.442	244.536
526.253	151.759	329.351
542.46	-78.8507	332.377
424.524	-280.479	325.86
471.946	100.213	326.02
349.688	93.8037	324.445
231.91	20.9901	325.992
427.424	-87.2234	329.157
404.284	-155.395	328.377
373.429	89.9693	328.906
312.197	-132.451	328.916
250.982	107.378	328.24
466.509	153.395	331.03
375.353	15.3665	330.779
266.727	324.366	321.62
220.816	221.579	321.62
207.243	225.162	321.62
445.25	319.018	325.596
362.818	336.436	325.608
337.939	249.455	325.106
299.16	314.494	323.631
297.598	302.683	324.309
275.547	184.452	325.764
246.364	324.516	323.472
239.534	226.37	324.331
474.9	180.138	328.13
389.287	280.42	327.669
344.618	232.756	329.218
252.91	231.124	328.849
215.308	324.927	327.337
196.948	137.515	326.566
453.078	337.719	330.313
433.407	184.218	330.695
387.549	220.465	331.089
350.48	302.531	331.237
337.037	201.959	330.222
254.008	171.035	330.265
231.535	325.921	330.627
130.826	86.611	326.026
160.683	-194.993	329.204
80.9204	44.6864	328.372
-108.271	93.3796	327.204
57.5779	2.3752	330.792
156.863	237.238	321.62
147.947	315.34	327.273
124.24	157.879	331.218
-139.669	-109.308	321.62
-235.842	-10.3945	321.62
-237.221	9.57063	321.62
-159.885	-93.4989	324.849
-168.571	-205.214	324.28
-186.112	-148.838	324.319
555.136	35.1579	404.474
691.298	-99.786	408.602
681.451	-46.6263	408.665
625.758	-17.2981	407.555
593.808	7.65099	408.022
574.442	119.156	408.67
566.828	69.9637	408.959
644.811	181.87	404.463
420.96	-244.905	406.169
488.053	-62.9011	401.62
468.018	-133.696	401.62
451.394	-63.3728	401.62
398.911	98.4898	401.62
280.717	68.0306	401.62
270.572	32.187	401.62
244.018	-182.464	401.62
485.555	-10.9383	407.384
424.084	52.1509	407.98
317.816	-66.808	406.92
276.195	-61.8488	407.858
438.806	284.525	401.62
387.141	245.105	401.62
343.653	268.223	401.62
334.357	285.403	401.62
331.246	243.579	401.62
335.82	150.865	401.62
330.727	192.442	401.62
286.802	176.256	401.62
494.134	279.992	404.206
427.687	345.179	404.934
288.546	131.361	404.662
465.331	239.083	407.166
328.898	389.382	408.963
103.095	105.869	401.62
80.7488	102.134	401.62
210.091	98.9161	405.202
58.6727	48.9195	404.099
160.375	111.182	407.265
152.101	175.366	401.62
145.528	157.014	401.62
135.377	255.278	401.62
217.118	182.136	406.269
158.294	261.075	408.866
115.364	255.664	408.154
-269.494	-309.149	407.778
-85.6327	-161.049	407.583
-344.451	152.183	401.62
-134.364	217.036	406.763
575.487	87.8694	488.042
684.539	92.1334	491.35
566.234	14.7461	491.634
640.592	153.543	486.734
472.56	-371.521	492.686
451.492	-299.862	490.747
446.893	-339.69	492.132
368.508	-335.657	491.665
547.1	-70.4927	481.62
398.342	91.281	481.62
333.048	-42.4857	481.62
463.125	-101.277	485.082
457.948	69.6904	485.22
256.749	-80.2801	486.243
533.433	-56.5959	487.915
368.018	-46.4726	487.456
303.416	-79.613	489.527
270.042	-201.856	491.556
472.724	272.749	481.62
457.031	265.668	481.62
419.181	96.3046	481.62
382.484	148.351	481.62
337.027	156.208	481.62
271.844	295.707	481.62
269.051	131.792	481.62
239.542	271.025	481.62
400.095	232.649	485.934
303.185	221.812	484.401
518.62	122.467	488.894
480.087	228.845	487.097
410.735	286.734	487.646
395.968	217.006	487.508
390.052	248.286	489.101
350.73	231.169	488.715
182.666	29.9904	481.62
164.525	18.6952	481.62
149.018	-16.6914	481.62
-85.2124	-87.85	491.113
138.784	244.691	481.62
151.501	219.359	484.826
215.408	101.729	487.554
159.345	170.358	488.15
195.17	308.993	491.399
-241.302	-275.397	485.769
-131.188	-214.673	481.62
-149.239	-223.648	481.62
-92.9208	-68.3848	489.098
-200.472	-229.218	488.688
-192.363	-90.7804	491.524
-492.931	8.64262	481.62
621.985	-66.4482	494.379
371.557	-235.409	569.335
392.886	-293.223	570.526
451.095	69.1959	568.475
425.029	68.5207	568.547
334.21	-48.1887	568.396
539.451	72.9951	572.392
385.612	-187.678	571.781
337.665	-12.0132	572.305
315.376	-30.3626	572.318
271.999	38.1409	571.272
463.142	292.529	569.704
346.082	119.427	568.417
266.982	113.965	568.283
497.816	281.606	571.017
360.889	157.213	572.449
161.775	24.6596	569.298
227.794	113.177	568.591
219.998	162.365	568.444
157.557	228.822	571.099
-255.694	-272.248	570.698
-328.41	-159.494	571.653
-383.059	-52.3256	571.286
-244.781	156.645	570.66
-415.035	-22.7149	572.655
-445.717	-116.013	569.836
385.826	-43.2949	575.249
298.475	38.5927	572.962
382.43	299.226	575.144
338.44	224.896	575.007
336.897	281.251	579.351
283.845	186.559	578.611
91.6578	21.7722	576.016
108.261	-53.1294	577.262
160.415	170.423	579.294
-291.719	-199.428	573.278
-404.527	-14.5602	574.25
-408.714	-109.088	574.013
626.421	-65.5759	651.496
420.408	-329.411	652.565
566.676	-0.5236	649.142
521.133	41.6299	649.697
366.398	65.0619	648.925
344.971	60.1244	649.021
561.203	55.8338	649.868
441.907	-34.2641	649.917
293.509	42.4424	650.651
372.373	167.879	649.357
427.516	191.272	650.923
398.886	231.351	651.172
301.529	225.775	651.687
137.637	-33.1028	649.522
112.987	-36.8415	650.968
276.733	277.398	652.351
243.221	376.825	652.529
177.564	133.747	651.293
-19.7696	164.881	651.401
-324.788	-130.992	648.596
-190.614	-226.393	651.898
-202.612	-246.023	649.896
-284.096	-73.1055	651.243
-400.09	-119.438	649.134
-379.034	-110.86	651.493
-435.94	-203.001	650.218
480.51	-49.3315	656.097
478.942	-143.775	653.569
595.857	23.6056	656.938
469.546	49.0599	657.146
400.967	-17.3883	657.959
471.578	85.14	653.919
520.746	154.844	656.334
340.653	224.453	657.261
292.856	177.292	656.839
313.849	423.34	661.06
145.706	25.836	655.722
106.767	-66.8364	655.679
94.9985	30.6484	656.851
264.535	130.277	654.796
200.831	176.46	655.2
144.567	289.107	655.267
166.107	115.029	656.63
-139.185	-174.91	657.429
-372.465	-77.1806	653.464
-410.532	-96.2004	654.688
-467.171	-154.73	655.296
656.582	-232.823	731.87
283.548	22.7671	729.692
576.262	-47.189	730.779
264.213	49.4364	732.803
250.685	-1.85935	730.157
218.158	55.4502	732.812
238.209	91.1106	730.847
152.614	253.342	731.447
-292.9	-65.0307	731.299
-218.949	141.485	730.047
-450.959	-102.44	731.159
615.56	-127.688	736.857
481.505	-373.755	733.825
393.43	-263.689	733.618
366.003	-262.962	733.584
518.704	20.9799	734.891
406.69	-14.3198	735.196
403.871	-63.4939	733.302
364.496	0.368166	737.11
352.052	-29.2444	736.266
267.702	-327.767	733.238
86.7566	13.2328	733.756
49.8921	15.8351	734.328
207.561	-2.9957	736.731
114.222	-40.2674	737.353
183.665	90.1943	733.919
-29.7357	62.4129	733.026
-96.3801	-107.427	733.657
-174.64	-50.6889	735.364
-180.256	-122.398	733.061
-240.704	-187.705	736.584
