# Supplementary material for: Spinal premotor interneurons controlling antagonistic muscles are spatially intermingled
Source: eLife. 2022 Dec 13;11:e81976. doi: 10.7554/eLife.81976 (PMC9844990; doi:10.7554/eLife.81976)
Supplement: Figure 3—figure supplement 2—source data 6. [file elife-81976-fig3-figsupp2-data6.xlsx]

## Sheet: Sheet1
-176.23	118.61	992
-278.44	-224.75	1216
-209.4	-182.52	1202
-240.98	-101	1196
-267.42	-222.18	1228
-282.11	-228.42	1228
293.08	261.31	1230
210.72	256.35	1228
398.28	-406.24	1232
425.15	-300.85	1232
494.37	-153.62	1228
453.04	-95.76	1212
507.29	-93.69	1200
35.39	155.82	968
165.53	384.14	992
323.93	57.23	984
531.2	93.43	974
570.87	-134.67	968
214.86	662.81	1220
415.42	60.41	1234
-96.53	184.47	1234
343.84	96.55	1452
100.16	113.34	1448
487.08	-222.37	1448
459.21	-39.09	1708
444.53	-0.17	1708
453.46	8.13	1708
-327.18	-294.45	1926
-157.63	-87.71	1936
268.69	268.15	1948
557.83	15.17	1916
540.98	56.09	1926
-258.51	-210.49	966
-200.92	-188.15	976
-380.8	-189.03	988
412.05	-264.18	964
579.83	-31.68	986
529.54	8.02	966
383.45	165.51	974
295.64	211.93	978
506.19	26.1	994
446.81	-6.69	982
440.56	-39.94	980
349.85	421.78	994
189.42	398.8	1210
207.28	85.02	1212
330.1	114.34	1218
190.18	306.97	1222
247.68	188.26	1222
-71.3	182.7	1230
30.73	238.19	1232
234.96	182.92	1232
350.34	212.02	1230
293.94	145.53	1234
307.25	335.25	1228
237.14	239.12	1228
372.69	197.67	1210
552.2	-41.3	1202
601.12	-85.27	1206
478.18	-86.11	1206
393.92	-20.66	1206
349.23	-169.13	1210
278.3	-36.37	1210
463.77	87.59	1216
473.17	60.39	1218
538.41	-56.95	1222
267.69	-161.82	1226
586.42	-145.45	1228
460.11	56.24	1224
270.83	-36.78	1232
475.16	114.36	1210
589.44	-177.46	1216
-338.4	-161.54	1230
-415.65	-29.67	1230
-419.15	-12.96	1228
-286.21	-131.67	1230
-423.93	-236.11	1226
-363.61	-188.94	1224
-137.97	-121.57	1226
-246.88	-52.49	1212
-125.16	-207.11	1210
-306.45	-14.23	1460
-249.88	-214.31	1464
523.68	-31.9	1468
302.72	267.19	1710
243.23	261.01	1702
-281	356.74	1698
450.55	-274.29	1702
341.85	-4.84	1698
-304.1	-185.67	1692
-239.87	-217.53	810
-276.45	-185.58	810
282.23	294.05	812
317.4	-4.57	812
494.6	-4.39	812
508.6	8.36	812
606.37	6.07	812
452.64	153.91	802
519.28	34.58	802
630.56	-7.97	802
421.12	-103.3	802
568.63	-56.96	808
-194.3	-187.51	1300
-216.36	-106	1300
-114.64	-112.39	1300
475.38	-329.43	1300
443.85	-177.91	1300
467.65	127.42	1316
454.27	-92.93	1312
342.61	74.18	1310
481.51	43.16	1308
480.39	-146.6	1306
272.52	116.51	1296
490.21	-282.38	1306
311.62	195.33	1310
186.13	329.8	1304
243.25	281.57	1302
324.64	246.46	1300
-195.49	-160.99	1334
-185.8	-152.3	1332
240.29	190.03	1780
474.52	-86.02	1780
488.37	-96.34	1780
602.88	-118.69	1774
388.41	182.11	1238
206.97	295.29	1224
503.68	25.48	1240
341.9	-55.62	1234
373.28	82.67	1230
-411.73	158.06	1724
291.62	59.33	1724
566.45	-103.33	1724
552.52	-75.43	1736
372.7	242.7	1730
324.85	-138.4	2690
415.03	-105.72	2662
411.9	-64.88	2662
-352.98	-78.04	2684
-489.17	-78.92	1250
-527.4	-282.06	1244
-437.96	-288.4	1236
-276.33	-272.5	1232
-223.97	-38.87	1230
-165.32	-205.31	1220
457.82	64.83	1252
149.3	119.36	1248
417.59	393.35	1244
228.36	230.64	1238
610.66	341.93	1236
352.83	266.65	1234
488.41	308.25	1232
387.6	219.61	1228
41.35	230.47	1218
-227.48	127.86	1228
-192.3	96.96	1228
-154.44	188.13	1238
291.64	100.22	1240
665.92	364.27	1254
657.58	519.11	1244
557.44	-176.25	1248
351.94	-134.73	1252
348.05	-195.82	1226
528.58	-212.89	1220
301.3	-177.1	1720
-195.76	-40.68	1704
-287.53	-97.41	1676
-347.773	267.015	810.644
175.114	220.857	801.39
197.844	257.66	801.39
287.784	-18.7559	801.39
297.468	-46.38	801.39
266.202	-22.0061	803.347
284.6	86.252	806.793
455.885	199.993	807.021
523.625	-42.5189	801.39
593.672	65.995	801.39
498.38	-23.2185	807.015
574.715	18.1979	807.947
381.5	-252.08	801.39
421.785	-261.773	801.39
406.246	-351.817	803.93
-456.602	310.224	881.39
332.867	285.022	881.39
345.028	146.549	881.39
380.428	218.611	881.39
388.081	187.46	881.39
220.667	260.441	883.825
281.633	288.258	886.738
142.586	178.745	889.028
58.3247	11.1418	881.39
101.668	41.3569	881.39
227.108	81.2178	881.39
430.652	218.197	886.419
494.734	324.107	889.194
423.803	-180.318	881.39
438.655	-114.452	881.39
490.261	80.5474	881.39
-232.397	-94.7171	892.88
-288.356	-278.872	967.605
209.565	264.339	967.934
209.754	30.9995	964.069
365.698	338.608	968.233
384.267	235.217	968.19
375.323	264.125	970.257
388.369	282.671	969.604
461.85	-148.251	961.39
396.658	104.668	967.476
541.121	142.532	966.901
471.425	-276.654	961.39
426.336	-228.62	965.49
685.366	1.74591	970.981
-237.604	-349.567	975.161
342.551	250.145	971.577
-373.14	-244.156	1050.47
132.76	249.529	1041.39
196.478	268.039	1041.39
225.439	67.7861	1041.39
247.004	24.3124	1041.39
278.647	-7.82599	1041.39
331.939	-124.798	1041.39
403.068	-23.3509	1041.39
414.799	-145.059	1041.39
547.008	-127.835	1041.39
396.047	74.9315	1048.66
-215.429	-207.446	1051.82
440.24	-315.118	1051.58
121.504	202.238	1121.39
168.683	224.574	1121.39
297.621	289.498	1121.39
328.823	252.065	1121.39
285.374	206.913	1125.51
340.601	298.431	1123.2
295.966	253.518	1126.48
308.914	72.8898	1121.39
320.318	97.9734	1125.32
340.06	133.447	1121.39
345.189	175.461	1121.39
453.63	254.481	1121.39
480.961	140.547	1121.39
455.596	171.97	1130.28
356.811	26.3563	1121.39
359.582	-27.9812	1121.39
451.394	32.262	1121.39
601.751	-176.965	1121.39
337.84	90.0612	1124.6
475.818	-328.546	1121.39
434.937	-292.925	1128.22
421.218	-351.263	1129.65
-297.187	-258.07	1209.19
260.062	212.443	1201.39
293.561	334.508	1209.66
227.425	28.0815	1201.39
237.817	-66.6155	1201.39
111.701	-1.9208	1204.53
132.432	-0.40617	1203.22
314.202	-80.7617	1203.09
177.614	-86.1689	1205.59
225.612	67.306	1206.44
262.471	-61.0778	1205.97
85.255	-124.036	1209.98
204.102	50.1986	1209.65
283.334	-58.0937	1209.57
294.345	-37.5907	1209.57
381.667	19.0969	1201.39
424.572	10.7577	1205.41
472.655	-76.7739	1207.78
650.491	-227.882	1208.85
310.97	144.214	1218.07
498.396	52.4933	1212.63
536.425	44.1631	1212.01
563.502	-7.71609	1214.84
551.185	-316.871	1211.75
-26.0141	16.4738	1290.4
-275.591	-209.585	1284.53
-222.523	-231.531	1288.35
154.852	190.492	1281.39
167.529	233.587	1281.39
177.34	151.217	1287.34
355.813	271.286	1290.54
60.379	21.2863	1281.39
86.138	-3.76278	1281.39
105.773	21.4964	1281.39
130.065	-1.3186	1281.39
136.683	-59.7385	1281.39
175.442	-21.2206	1281.39
216.122	-57.7869	1281.39
231.92	-54.9147	1281.39
313.431	-7.86916	1281.39
310.943	-53.0234	1281.39
259.815	-137.282	1284.97
60.4758	-60.4227	1287.05
237.095	-109.239	1286
318.227	28.7759	1288.71
165.905	-229.499	1285.22
197.568	-184.342	1289.4
411.095	154.232	1281.39
343.987	-144.296	1281.39
514.676	32.1939	1290.98
488.142	-265.757	1287.32
48.3404	63.7301	1293
188.533	-242.123	1292.49
129.198	251.869	1365.13
234.719	252.381	1364.89
259.121	248.58	1365.04
68.8648	19.0166	1361.39
112.194	11.2489	1361.39
235.622	112.964	1361.39
103.995	-7.17507	1364.05
416.609	158.311	1367.91
367.002	-332.1	1365.08
394.448	-391.951	1368.54
148.781	249.397	1378.07
172.061	7.44188	1372.4
250.659	8.89318	1375.47
514.276	52.803	1374.17
-117.312	-56.4242	1451.11
272.536	213.593	1443.86
310.182	290.244	1444.54
198.945	84.1247	1444.18
53.1748	4.88765	1447.88
98.8169	30.3593	1448.73
341.402	294.674	1444.99
365.35	146.355	1450.33
378.97	269.805	1450.57
519.208	-149.069	1445.65
377.037	66.896	1449.66
451.379	-328.552	1456.03
644.134	-225.017	1458.07
-105.947	10.0244	1521.39
-134.962	-108.846	1529.44
-250.986	-214.816	1521.39
77.5873	-48.147	1521.39
80.8135	-20.5483	1521.39
341.692	135.783	1521.39
110.301	13.9483	1523.48
153.767	106.304	1523.08
221.572	111.701	1523.54
146.916	45.1569	1530.42
179.302	101.713	1530.91
229.331	39.7695	1528.72
500.797	-410.14	1527.78
663.705	-246.438	1529.39
-209.913	-237.606	1535.39
207.805	95.6348	1531.15
400.627	274.72	1538.07
385.647	-21.2581	1534.96
515.654	156.883	1534.55
503.308	-164.821	1532.46
-431.891	-291.098	1601.39
-178.35	-149.067	1601.39
-213.206	-179.386	1606.58
147.456	225.783	1601.39
93.0023	29.9834	1601.39
121.712	35.9143	1601.39
289.37	149.116	1601.39
309.443	167.302	1601.39
353.999	167.011	1601.39
394.161	176.876	1605.29
365.99	85.7252	1607.46
432.636	219.967	1607.27
442.728	198.326	1606.89
515.961	105.231	1606.42
416.931	-377.598	1601.39
517.939	-217.664	1609.44
599.327	-425.537	1610.58
713.06	-213.548	1605.04
525.818	28.3958	1611.6
550.274	-42.5522	1613.16
559.981	-316.313	1611.64
-270.377	-247.159	1681.39
238.004	205.512	1681.39
77.8432	34.9282	1681.39
111.588	-48.6138	1681.39
189.097	-44.8981	1681.39
214.979	-52.9592	1681.39
297.754	-34.8507	1685.23
112.471	119.568	1688.41
311.671	188.727	1689.87
478.675	-59.682	1681.39
533.914	-7.17231	1681.39
472.92	14.9089	1686.94
411.264	162.761	1690.86
610.105	-16.2171	1690.75
395.166	67.8035	1691.71
547.257	-178.847	1698.07
-235.128	-273.206	1761.39
64.0505	35.5484	1761.39
315.795	254.477	1761.39
95.1264	25.7919	1761.39
219.926	31.7442	1761.39
260.322	134.291	1761.39
281.598	161.137	1761.39
283.082	122.936	1761.39
366.783	174.189	1761.39
404.478	128.562	1761.39
560.202	-1.45669	1763.05
523.37	-144.893	1761.39
205.647	95.2481	1841.39
228.008	82.1478	1841.39
185.42	-107.485	1850.2
614.112	36.3603	1850.62
509.709	-186.723	1846.12
482.36	-411.048	1841.39
494.023	-472.126	1841.39
552.607	-477.823	1841.39
496.083	-378.148	1845.07
560.184	-399.421	1844.3
-379.892	-139.908	1921.39
-220.476	-59.0518	1921.39
-119.442	-30.9634	1928.87
315.629	231.827	1921.39
229.746	99.3397	1921.39
267.118	15.4697	1921.39
287.493	139.552	1921.39
168.564	202.295	1929.83
467.289	9.22225	1929.21
489.714	-176.003	1921.39
553.444	-444.077	1930.84
703.155	-153.95	1929.56
555.135	18.1964	1931.22
558.549	-43.5995	1932.17
315.17	-31.136	812.51
173.944	-42.433	809.73
62.9782	-26.0051	804.17
9.06022	-32.498	801.39
-145.175	-90.9848	815.29
113.611	267.202	809.73
186.868	302.84	806.95
259.206	180.123	815.29
358.029	210.386	809.73
353.738	283.73	804.17
339.002	191.697	806.95
352.893	171.299	806.95
275.456	103.722	804.17
178.809	7.92552	806.95
161.283	49.6202	804.17
481.259	-29.581	809.73
450.676	55.6869	801.39
423.81	-446.901	813.339
-34.7865	-101.884	812.51
-237.468	-230.237	806.95
414.25	-208.124	881.39
271.835	-171.652	889.73
338.279	-337.626	889.512
328.541	-109.575	889.73
270.795	-65.643	886.95
263.492	-0.490582	884.17
296.831	101.382	881.39
319.1	108.622	884.17
273.055	138.328	886.95
371.179	224.241	892.51
97.5953	148.175	881.39
-184.783	-196.843	887.764
499.294	-101.529	967.631
415.918	-191.427	964.17
396.786	-192.105	961.39
203.957	229.277	964.17
117.121	239.813	969.73
168.306	133.152	961.39
220.281	126.058	961.39
302.428	208.165	964.17
238.425	184.86	961.39
417.3	-182.709	1049.73
481.252	117.482	1049.73
512.999	82.4729	1048.6
537.479	54.4081	1043.26
531.263	177.845	1046.66
345.701	225.907	1044.17
334.909	54.1336	1041.39
272.584	97.8915	1044.17
222.197	83.1409	1044.17
249.789	113.943	1041.39
97.807	44.0376	1044.17
197.789	92.7965	1049.73
288.339	54.4167	1041.39
97.7845	-32.6645	1044.17
495.145	-46.7839	1135.29
430.208	-197.323	1129.73
440.504	-452.62	1134.12
93.927	25.7692	1129.73
176.01	155.913	1124.17
318.903	243.321	1126.95
453.675	37.5711	1132.51
-215.085	-207.938	1132.4
-207.016	-240.114	1131.53
47.1538	11.4294	1124.17
386.403	-49.2452	1124.17
226.851	37.2963	1124.17
190.12	196.721	1124.17
397.169	161.748	1201.39
298.92	170.887	1212.51
275.334	160.091	1204.17
285.902	247.954	1209.73
237.933	-146.466	1209.73
410.899	-397.578	1216.55
-110.52	-208.315	1206.95
-104.623	-135.662	1209.73
-386.224	-44.8235	1215.92
262.304	-97.3781	1286.95
402.977	-194.559	1281.39
342.617	-14.2314	1289.73
334.777	36.1645	1289.73
292.907	255.748	1284.17
113.811	10.3326	1289.73
278.127	244.444	1289.73
560.967	-219.792	1287.48
280.984	246.868	1364.17
252.351	167.726	1366.95
220.614	206.862	1361.39
137.067	162.377	1361.39
119.888	274.868	1364.17
266.498	123.06	1364.17
-393.115	37.7091	1361.39
-121.264	-223.057	1366.95
196.807	1.94011	1369.73
410.558	310.201	1449.54
342.295	174.236	1446.95
301.387	113.819	1446.95
246.225	21.1186	1444.17
183.011	165.628	1446.95
335.227	-211.122	1446.95
-149.334	33.1315	1446.95
-244.049	-250.489	1453.56
-164.846	-138.877	1451.26
-270.802	123.701	1451.42
-185.448	331.298	1442.1
335.645	-0.99316	1449.74
-246.638	-41.3883	1528.81
-354.541	255.788	1530.28
-430.412	134.708	1527.83
217.237	-6.68675	1524.17
317.455	73.995	1529.73
394.786	-175.614	1529.73
493.142	-155.173	1532.51
394.974	188.88	1532.51
238.316	173.482	1526.95
239.631	113.678	1529.73
350.887	206.827	1526.95
-243.382	384.156	1608.35
3.8866	-64.6536	1601.39
-185.167	-195.533	1606.95
-278.104	-104.289	1612.51
275.079	-95.4677	1601.39
258.915	89.7839	1601.39
337.536	92.9575	1604.17
459.931	142.86	1694.56
371.906	-14.3221	1686.95
311.754	-17.6364	1689.73
250.162	39.8731	1684.17
161.9	197.531	1686.95
631.58	-172.418	1688.3
148.772	56.5892	1684.17
96.9941	8.89346	1686.95
271.604	129.778	1763.36
399.246	199.564	1767.34
220.274	93.8786	1761.92
184.713	60.9205	1772.99
188.556	33.1595	1769.73
370.75	-140.876	1772.51
428.693	-224.994	1769.73
479.25	-201.844	1772.51
48.3756	18.3476	1764.17
-215.782	337.697	1841.96
117.93	205.162	1841.7
-212.812	-233.653	1843.63
307.684	-147.277	1841.39
386.974	209.783	1847.06
386.779	-347.404	804.375
365.8	-319.167	807.523
310.543	-223.917	807.757
486.056	-50.8543	809.493
468.189	30.6088	807.83
354.702	-205.463	808.842
306.391	-120.615	808.436
297.963	42.579	807.468
415.987	-96.9645	810.89
297.439	26.566	811.37
264.999	206.976	801.62
215.81	278.293	805.649
212.258	327.513	806.171
332.025	108.141	807.287
287.65	217.19	807.943
359.909	244.403	811.819
307	116.809	810.757
174.023	14.171	801.62
-49.7579	-141.197	801.62
197.725	-99.8139	805.41
171.505	83.7496	806.497
80.9281	44.2258	807.209
62.5494	8.36596	808.18
46.72	-138.593	806.713
139.434	168.599	805.937
161.286	224.364	807.713
117.016	202.836	806.632
100.418	170.082	808.756
95.6675	287.941	807.704
183.65	346.793	810.205
55.814	246.821	810.479
-243.106	-262.707	805.77
-126.227	-208.632	805.87
-134.98	50.3403	807.055
-280.184	-143.653	807.504
-151.101	52.866	810.895
-258.528	-122.351	812.398
-277.323	-116.813	812.208
-282.259	142.056	808.619
-203.038	111.6	810.069
-283.102	119.689	809.811
595.332	40.0415	889.241
458.946	-319.019	889.129
459.914	37.8222	881.265
446.478	-196.469	885.906
413.686	37.6784	884.404
299.355	-2.89321	889.141
592.488	-157.393	892.078
304.237	189.232	881
325.917	149.767	884.323
400.073	131.861	887.624
485.829	130.257	890.226
349.031	162.946	889.408
339.831	240.539	889.226
280.32	290.262	891.737
317.189	399.407	880.499
294.465	394.977	884.822
197.038	257.301	880.902
216.34	260.432	884.618
211.798	233.484	884.57
260.107	232.447	888.879
251.16	162.172	886.827
-233.107	-158.281	890.643
-321.132	-193.28	892.148
697.373	-122.399	897.703
555.456	-120.16	894.823
420.882	-65.1731	894.792
339.487	196.281	892.349
353.872	206.488	897.13
169.745	7.49556	894.39
73.318	-69.9213	897.942
263.55	272.077	897.029
-281.073	-242.085	898.551
671.447	-127.648	964.94
479.635	-333.804	961.62
616.673	15.3803	961.62
533.558	-93.1334	961.62
382.062	-26.6872	965.431
594.537	77.2452	966.837
514.128	28.9113	969.049
420.065	-70.1231	969.074
372.71	-88.9124	968.508
485.327	21.9389	969.867
388.584	164.262	961.62
383.93	260.376	961.62
364.664	312.986	961.62
334.549	100.491	961.62
343.762	213.128	968.006
383.572	308.656	971.364
336.673	129.26	970.824
291.965	-5.67231	961.62
153.854	-5.16013	961.62
317.988	61.2614	964.984
135.713	66.647	968.46
188.707	148.448	961.62
254.969	228.928	969.583
159.5	193.772	967.406
151.601	262.507	971.641
-139.966	-232.556	961.62
-108.485	-213.485	961.62
-198.685	-134.671	961.62
-179.5	-197.574	968.806
-219.619	-230.322	968.135
1.0778	-127.568	972.856
-386.14	209.639	970.136
303.782	-217.325	1041.62
535.413	100.354	1041.62
517.373	99.3325	1041.62
416.111	13.0479	1041.62
292.978	-199.192	1041.62
591.335	38.287	1044.89
572.962	-89.1679	1043.74
487.737	62.4729	1046.04
438.792	58.2257	1048.63
587.496	15.8743	1051.59
569.313	189.463	1041.62
458.462	133.014	1041.62
329.943	152.582	1041.62
305.656	307.726	1041.62
302.128	141.521	1041.62
266.285	240.066	1041.62
492.102	155.444	1045.81
358.073	254.946	1044.88
570.288	169.04	1048.59
466.434	231.342	1047.39
272.871	148.134	1046.6
432.194	214.383	1052.57
263.318	-175.248	1045.94
68.7513	74.9631	1044.34
142.374	58.8117	1050.45
120.265	366.536	1045.56
-150.526	61.3373	1041.62
-161.139	-174.306	1041.62
-436.154	-55.8066	1049.56
300.39	160.169	1054
270.745	307.269	1054.96
226.138	389.723	1053.74
83.2731	142.633	1055.72
584.187	-241.938	1121.62
625.945	-253.329	1129.07
546.68	98.1272	1121.62
550.264	28.8191	1121.62
480.357	-33.2245	1121.62
426.059	-33.4895	1121.62
420.66	-52.3978	1121.62
384.835	82.7277	1121.62
581.322	-15.4799	1125.07
582.512	-47.3117	1124.17
551.271	-63.7296	1124.24
365.194	55.7383	1124.06
362.962	69.1399	1123.39
551.32	-148.52	1127.59
503.795	-203.404	1128.2
386.653	-102.727	1127.97
442.455	263.755	1121.62
371.685	154.593	1121.62
332.186	148.234	1121.62
293.222	135.283	1121.62
428.258	161.829	1126.38
497.517	149.802	1129.01
542.52	180.335	1130.65
267.289	-41.5691	1130.63
148.978	61.3162	1130.65
275.688	110.767	1121.62
233.057	194.283	1121.62
90.179	131.157	1121.62
245.813	118.104	1125.18
165.483	101.84	1124.89
53.9805	141.203	1124.78
254.911	214.052	1129.96
119.566	269.516	1131.46
-185.793	-211.934	1121.62
-223.768	-268.112	1121.62
-57.3936	-137.48	1132.88
-182.192	-121.674	1130.97
-46.7838	96.8692	1123.3
-341.352	-164.194	1121.62
-377.456	-179.979	1121.62
-384.146	185.579	1126.95
-580.672	98.3595	1130.56
65.3716	92.1786	1133.39
638.555	-64.8462	1209.16
349.65	-351.14	1205.35
509.78	18.2452	1201.62
512.406	-101.278	1201.62
497.402	-27.8577	1201.62
489.809	48.2481	1201.62
468.332	49.8544	1201.62
454.348	-201.93	1201.62
444.838	24.4426	1201.62
422.437	70.2921	1201.62
397.775	-17.1665	1201.62
312.819	-45.2764	1201.62
299.683	-22.6503	1201.62
408.12	-21.8696	1205.45
563.716	-147.655	1207.81
499.973	-161.793	1206.93
449.261	-176.008	1207.14
269.15	-73.4989	1207.87
510.068	106.858	1201.62
430.103	90.0298	1201.62
426.102	157.013	1201.62
345.832	143.211	1201.62
261.861	87.2253	1201.62
308.822	173.505	1207.62
297.394	259.09	1209.19
262.98	181.853	1208.22
99.4837	-98.3186	1201.62
99.7065	-49.7824	1207.48
111.05	75.502	1209.89
229.382	270.046	1201.62
202.105	241.587	1201.62
144.727	220.35	1205.89
239.869	235.959	1209.14
-228.642	-371.561	1201.62
-153.493	-283.353	1206.21
-283.4	-279.689	1211.77
-170.955	-215.711	1201.62
-242.55	-184.827	1201.62
-276.452	-227.279	1201.62
-108.277	-193.43	1204.94
-235.367	-173.061	1209.34
-341.362	-161.903	1209.08
-295.194	-241.612	1212.01
-395.356	23.3058	1209.72
635.094	-247.518	1281.62
595.312	27.4711	1281.62
572.816	-71.3173	1281.62
563.413	4.78261	1287.13
257.366	-282.279	1288.61
554.648	-170.775	1281.62
500.208	-126.164	1281.62
465.304	0.188711	1281.62
260.476	14.0869	1281.62
516.686	-156.131	1283.77
551.558	39.5214	1287.35
467.307	50.8679	1288.01
434.55	26.7455	1287.4
338.761	-63.0863	1288.57
315.966	-8.02572	1287.83
313.03	30.0719	1289.87
313.54	-22.8251	1289.8
278.63	-48.6752	1290.31
499.151	165.849	1281.62
473.648	172.624	1281.62
418.68	234.329	1281.62
388.529	169.149	1281.62
374.772	168.148	1281.62
363.936	221.675	1281.62
272.623	236.195	1281.62
449.367	170.71	1285.32
421.125	222.177	1284.51
355.702	110.893	1284.37
290.782	127.159	1285.55
17.4774	-61.6701	1281.62
167.162	70.6159	1283.25
148.267	45.7861	1285.26
77.0265	-15.4179	1285.97
236.729	10.1596	1287.06
222.317	170.336	1281.62
154.93	122.335	1285.11
121.706	223.294	1284.75
221.155	100.291	1286.56
-208.053	-228.969	1281.62
-84.7457	22.0016	1284.42
-219.222	-178.11	1284.85
-257.403	-202.648	1285.43
-272.904	-212.795	1284.14
-334.674	-19.9645	1285.15
-355.83	-55.3764	1286.58
-333.733	-225.484	1292.75
-466.642	208.277	1286.34
634.952	-79.0178	1364.36
628.58	1.34982	1368.8
384.207	-344.034	1368.57
605.559	-112.734	1364.75
378.761	-142.712	1365.79
607.774	-5.84292	1368.87
596.918	30.9779	1366.63
581.168	-58.4938	1366.8
552.176	-17.8958	1367.62
515.946	58.7866	1367.55
434.43	63.0861	1367.53
342.795	-59.5395	1367.62
316.062	57.1886	1369.11
418.17	-211.483	1371.01
345.827	-104.173	1370.74
528.643	196.196	1365.25
511.344	226.652	1364.39
505.98	321.79	1367.79
492.079	121.126	1369.23
362.452	193.774	1367.9
307.473	109.692	1367.88
210.038	43.5048	1367.8
310.093	-73.818	1369.73
260.163	92.9399	1366.22
300.324	95.3826	1368.44
239.661	244.154	1366.61
189.785	280.354	1367.83
118.646	68.3946	1368.45
288.76	148.206	1370.14
225.649	132.148	1372.05
201.201	161.474	1371.77
146.466	254.444	1370.38
-187.548	-192.428	1369.63
-149.578	-165.241	1370.65
-202.148	-116.041	1372.27
-233.767	-203.727	1370.76
-239.352	-238.536	1370.77
-246.705	-174.66	1369.87
-263.817	-236.627	1370.74
-282.994	-90.3038	1370.7
-290.039	-181.355	1372.4
-289.114	203.325	1369.5
-349.434	211.527	1371.04
-363.237	230.77	1372.52
-519.545	-118.35	1377.82
-356.16	247.193	1374.53
-359.111	180.757	1375.5
