# Supplementary material for: Spinal premotor interneurons controlling antagonistic muscles are spatially intermingled
Source: eLife. 2022 Dec 13;11:e81976. doi: 10.7554/eLife.81976 (PMC9844990; doi:10.7554/eLife.81976)
Supplement: Figure 3—figure supplement 2—source data 7. [file elife-81976-fig3-figsupp2-data7.xlsx]

## Sheet: Sheet1
-324.32	-140.46	-5010
141.05	202.35	-5024
-403.73	-385.21	-5028
-281.84	317.64	-4780
55.36	303.7	-4786
354.8	268.64	-4794
160.56	17.71	-4802
-314.69	-0.15	-4768
-249.37	-275.61	-4792
258.04	234.05	-4534
240.44	118.76	-4540
370.06	-59.01	-4562
-146.46	-89.42	-4558
-264.52	-302.9	-4556
-271.5	-284.18	-4560
-289.01	289.86	-4306
144.88	156.3	-4290
363.51	186.35	-4294
304.29	20.77	-4296
299.59	-85.82	-4298
393.74	-204.93	-4310
331.69	141.56	-4322
247.42	-13.66	-4320
280.45	307.93	-4304
-49.3	-119.55	-4064
184.48	126.19	-4072
208.38	27.71	-4074
386.24	-74.55	-4080
-183.13	-96.89	-4084
291.15	12.58	-3810
219.47	216.91	-3812
247.73	176.33	-3818
102.88	166.48	-3832
447.39	-124.2	-3826
477.62	-10.79	-3808
-138.38	-150	-3812
-232.28	-306.68	-3828
-158.84	62.78	-3590
-98.6	-162.01	-3588
156.56	159.6	-3590
-157.18	-203.13	-3580
309.48	-162.23	-3590
-104.55	128.75	-3586
189.53	258.19	-3578
426.97	291.45	-3596
362.99	198.11	-3604
-284.51	167.43	-3338
-123.86	123.22	-3344
-265.87	-78.24	-3348
104	97.6	-3362
272.54	112.21	-3330
549.95	-6.02	-3332
440.14	-26.17	-3334
433.04	61.61	-3338
458.24	-61.63	-3340
556.06	-132.97	-3344
429.31	-49.45	-3352
536.87	-114.15	-3354
353.34	106	-3360
399.25	37.7	-3360
-95.09	-174.68	-3094
-166.84	-57.48	-3126
37.93	14.07	-3098
420.09	52.07	-3088
549.99	-44.81	-3088
287.01	28.83	-3092
429.42	50.03	-3098
283.19	31.73	-3098
475.96	27.52	-3104
454.27	85.61	-3104
327.03	327.82	-3112
283.68	-6.4	-3116
258.96	-85.65	-3118
379.14	5.3	-3122
285.44	117.97	-3114
305.63	-186.12	-2878
59.25	224.71	-2606
120.63	279.4	-2612
201.14	84.68	-2612
262.15	130.19	-2616
247.68	136.17	-2622
235.51	144.6	-2622
188.44	293.88	-2632
255.98	193.18	-2634
330.32	194.96	-2630
137.74	275.55	-2636
292.96	327.91	-2640
283.62	138.38	-2642
424.86	45.37	-2620
448.68	68	-2624
359.19	-125.03	-2626
283.46	59.46	-2628
496.82	15.68	-2632
102.82	-96.99	-2400
117.13	14.04	-2402
173.01	230.97	-2402
152.96	114.58	-2402
517.66	-36.29	-2400
-111.86	-147.64	-5022
218.31	172.61	-4766
282.77	352.41	-4800
502.98	118.18	-4536
350.27	269.46	-4540
328.9	245.12	-4542
236.16	218.4	-4556
296.21	61.78	-4558
437.91	9.74	-4564
-171.64	-158.76	-4564
-247.33	-130.49	-4532
-221.6	-212.85	-4292
-219.81	-96.57	-4318
214.21	417.05	-4308
422.38	20.22	-4316
-141.82	-327.94	-4058
-205.69	-172.96	-4062
355.32	-65.3	-4050
198.41	360.72	-4062
409.73	191.01	-4068
416.4	-77.77	-4086
252.46	244.06	-3806
-150.96	-161.55	-3818
-256.01	-159.76	-3670
-284	-176.59	-3656
255.81	271.43	-3666
366.98	95.9	-3688
462.74	-0.9	-3658
439.41	13.33	-3656
367.81	-44.58	-3654
396.89	-313.21	-3690
24.34	-39.5	-3346
-99.12	-163.57	-3346
-156.8	38.29	-3336
204.42	190.84	-3094
52.73	9.47	-3112
261.87	89.95	-3114
325.51	230.79	-3114
225.02	253.05	-3128
256.34	69.63	-3130
300.92	82.75	-3126
296.92	-174.87	-3096
245.28	-169.79	-3118
430.07	-69.33	-3124
-169.71	-50.31	-3120
-167.71	-159.72	-3102
283.93	-10.92	-2858
-81.11	313.28	-2868
-202.1	114.37	-2872
-224.95	-32.12	-2872
290.83	1.93	-2868
379.52	-54.53	-2884
320.6	36.5	-2882
338.76	108.32	-2882
-243.54	-127.36	-2862
282.99	-142.22	-2862
446.36	-120.81	-2870
484.66	184.83	-2866
478.75	21.56	-2672
225.31	83.53	-2672
208.62	140.21	-2672
152.39	162.75	-2668
254.07	113.13	-2662
414.5	31.26	-2652
242.43	52.25	-2656
352.87	-124.02	-2660
407.2	-190.24	-2660
439.18	-227.43	-2666
503.74	-171.92	-2664
443.6	-123.73	-2664
468.3	-161.15	-2658
393.55	-18.26	-2682
-280.76	-196.48	-2658
-190.54	-274.43	-2678
-144.54	-112.95	-2682
-181.51	-155.53	-2684
-273.89	-125.48	-2402
249.59	211.5	-2402
262.221	191.748	-2790.27
145.851	139.157	-2784.71
-256.82	-50.483	-2790.27
-412.981	54.8265	-2790.39
-271.79	-119.943	-2787.49
-272.417	52.487	-2718.53
-208.459	-114.241	-2716.32
360.791	-210.552	-2711.25
465.831	-129.043	-2708.41
442.412	38.8704	-2713.77
350.345	-36.2268	-2713.77
342.435	-15.6772	-2713.69
265.833	-12.0731	-2715.83
341.686	-203.237	-2627.49
417.509	-195.574	-2627.49
310.517	37.0508	-2630.27
361.624	-29.3785	-2630.27
304.907	139.734	-2627.49
4.9409	60.2972	-2630.27
-172.683	-10.8728	-2630.27
-175.955	-123.241	-2627.49
-105.532	-76.6398	-2630.27
258.756	-222.116	-2627.49
-189.115	-137.575	-2550.27
-193.675	-100.963	-2550.27
304.717	39.1459	-2547.49
403.624	-51.2372	-2544.71
257.53	30.7725	-2550.27
125.401	216.909	-2550.27
168.52	118.816	-2547.49
418.855	-45.2109	-2550.27
-329.601	-116.236	-2547.49
243.3	186.089	-2467.49
156.436	97.5492	-2467.49
-12.2112	87.4878	-2467.49
-147.055	-116.1	-2470.27
-242.798	-99.8008	-2470.27
334.594	-57.9017	-2470.27
368.146	-13.7069	-2467.49
269.59	37.1106	-2470.27
211.196	22.0478	-2470.27
362.585	66.8731	-2467.49
428.422	35.1354	-2464.71
471.781	5.72026	-2467.49
488.37	-133.937	-2790.18
521.263	-109.567	-2786.12
562.929	-219.719	-2783.29
371.233	222.626	-2784.44
102.484	-77.4846	-2789.16
270.979	258.652	-2784.74
68.0052	143.119	-2787.06
-306.986	-286.219	-2804.04
-264.377	-40.6551	-2797.57
-257.775	-73.3432	-2793.32
-311.096	-78.725	-2794.16
-360.573	-307.434	-2802.4
-404.426	-18.3129	-2797.67
628.109	-61.6582	-2718.38
484.326	70.8062	-2718.38
325.556	31.0446	-2718.38
521.321	-136.191	-2711.88
512.378	-31.1118	-2712.41
286.653	13.7524	-2711.97
160.684	-80.953	-2718.38
17.4552	-46.6631	-2718.38
-5.05864	-45.3735	-2718.38
255.218	99.9914	-2716.44
85.0817	238.852	-2715.51
524.748	-31.561	-2638.38
482.453	34.7668	-2638.38
547.153	13.9107	-2634.68
210.499	114.846	-2638.38
164.405	-80.2786	-2638.38
322.632	-163.949	-2634.2
258.202	201.609	-2638.38
242.744	361.95	-2638.38
250.183	389.435	-2636.54
-230.849	-247.786	-2638.38
-382.213	-293.266	-2638.38
-325.616	-326.225	-2632.08
475.011	-280.853	-2551.71
484.433	12.0518	-2558.38
539.295	-179.585	-2553.81
420.74	101.903	-2550.69
182.849	-108.192	-2555.26
312.354	271.456	-2558.38
252.944	255.858	-2558.38
253.772	392.909	-2551.58
141.145	117.086	-2552.63
342.122	252.814	-2549.29
329.538	274.827	-2547.76
280.386	308.656	-2548.47
257.622	202.177	-2550.02
-275.619	-244.587	-2548.99
-17.457	75.72	-2558.38
-273.73	-111.981	-2558.38
-237.658	-152.859	-2550.52
-316.029	-250.681	-2547.26
463.849	89.4207	-2478.38
463.448	-9.49041	-2478.38
439.479	103.952	-2478.38
435.878	-8.07013	-2478.38
394.312	91.9136	-2478.38
386.147	82.9184	-2478.38
380.186	64.1918	-2478.38
365.857	110.039	-2478.38
344.343	28.511	-2478.38
343.861	66.6535	-2478.38
339.888	43.3038	-2478.38
406.824	194.314	-2478.38
389.312	270.717	-2478.38
389.576	139.49	-2478.38
363.121	134.585	-2478.38
355.739	129.28	-2478.38
322.854	82.5222	-2478.38
322.156	164.261	-2478.38
-129.607	-146.235	-2471.96
-91.0466	-35.5722	-2468.14
-318.772	-419.19	-2462.18
-357.677	-174.239	-2462.18
