# Supplementary material for: Spinal premotor interneurons controlling antagonistic muscles are spatially intermingled
Source: eLife. 2022 Dec 13;11:e81976. doi: 10.7554/eLife.81976 (PMC9844990; doi:10.7554/eLife.81976)
Supplement: Figure 3—figure supplement 2—source data 8. [file elife-81976-fig3-figsupp2-data8.xlsx]

## Sheet: Sheet1
132.83	35.3	-2366
-73.37	-123.59	-2380
102.82	-96.99	-2400
136.16	126.13	-2370
234.6	59.42	-2382
285.57	122.67	-2384
357.44	216.73	-2384
186.3	223.72	-2388
448.5	159.88	-2390
490.86	52.48	-2388
592.15	88.11	-2386
597.08	61.84	-2394
506.69	89.74	-2398
403.93	100.87	-2398
383.28	49.39	-2394
356.11	-74.83	-2370
571.75	-101.31	-2368
629.12	-22.4	-2370
325.37	-21.85	-2378
504.93	-322.82	-2390
564.62	-325.69	-2394
453.82	-33.23	-2392
517.66	-36.29	-2400
-109.49	-90.86	-2154
-319.6	-134.61	-2138
428.82	182.03	-2130
134.9	257.86	-2132
204.04	161.42	-2132
227.95	222.52	-2142
93.36	48.01	-2144
70.13	5.27	-2144
560.1	47.14	-2142
543.22	10.29	-2144
442.7	92.34	-2146
244.43	6.97	-2150
295.27	16.96	-2146
190	171.67	-2144
280.81	264.55	-2154
438.1	196.96	-2158
320.68	16.08	-2158
531.9	70.94	-2160
97.27	127.6	-2158
369.03	-29.95	-2162
340.82	-90.82	-2148
365.87	-98.09	-2150
527.35	-123.71	-2150
562.83	-120.76	-2140
488.84	-180.95	-2132
186.1	114.65	-1890
198.84	91.57	-1904
-305.54	28.24	-1910
-261.46	-204.84	-1914
-225.89	-158.56	-1918
-329.52	-152.63	-1918
429.37	158.96	-1890
502.3	95.88	-1894
318.44	253.11	-1890
514.53	34.33	-1892
246.93	270.73	-1896
391.44	212.99	-1902
438.5	217.42	-1906
392.58	197.65	-1908
354.32	218.52	-1910
323.68	177.44	-1906
265.3	47.75	-1902
592.58	49.61	-1918
597.36	19.59	-1914
214.83	131.09	-1918
434.22	92.91	-1918
294.68	421.96	-1922
128.91	236.79	-1920
220.71	56.76	-1920
511.93	-9.26	-1918
293.53	2.33	-1898
372.57	129.34	-1892
596.19	-40.03	-1888
593.81	-180.57	-1888
543.84	-196.6	-1904
467.83	-377.93	-1906
566.54	-73.28	-1908
591.62	-61.24	-1912
222.33	-58.28	-1908
650.44	-173.93	-1910
434.8	-270.5	-1918
449.92	-288.17	-1916
382.21	-433.68	-1916
381.24	-179.14	-1920
-103.12	-5.51	-1648
-133.69	-177.81	-1652
-193.16	-220.09	-1650
88.93	39.41	-1656
-213.24	-206.45	-1660
-14.32	83.41	-1664
-245.38	-176.89	-1670
-461.74	-178.69	-1672
-78.83	-115.73	-1674
-227.48	-154.59	-1676
170.76	380.3	-1648
147.08	357.36	-1662
464.9	117.52	-1662
180.38	333.11	-1670
292.05	171.38	-1672
173.38	214.26	-1676
203.1	112.27	-1676
399.44	257.41	-1674
411.32	254.27	-1670
127.75	246.46	-1680
278.48	398.64	-1682
370.4	199.25	-1682
466.05	40.46	-1648
502.9	74.69	-1650
455.79	-177.77	-1654
348.04	-298.47	-1656
248.51	-32.13	-1656
190.44	15.55	-1652
356.84	-66.56	-1660
533.82	-147.88	-1666
594.62	-12.96	-1672
516.05	-8.6	-1674
596.89	40.66	-1670
447.18	-224.01	-1680
492.29	-279.37	-1674
-34.76	-22.39	-2374
188.38	-144.3	-2394
428.6	170.11	-2396
245.6	188.73	-2398
142.49	171.42	-2396
199.14	94.68	-2388
427.95	15.3	-2384
470.78	122.96	-2382
156.81	248.26	-2380
270.9	211	-2376
372.01	154.16	-2374
331.39	80.74	-2370
315.84	-67.99	-2372
297.11	-342.41	-2370
485.66	-69.73	-2374
366.88	-207.68	-2376
468.58	-36.62	-2380
481.74	-149.71	-2378
511.02	-169.63	-2382
405.33	-102.24	-2390
405.68	-65.82	-2394
284.45	228.15	-2170
494.48	40.21	-2172
432.43	99.39	-2174
216.66	57.81	-2184
413.8	143.92	-2182
281.3	186.73	-2188
115.63	334.88	-2188
258.81	322.97	-2184
263.2	160.28	-2194
166.2	147.98	-2194
433.13	302.74	-2200
364.53	95.87	-2200
253.97	219.24	-2208
425.85	44.57	-2214
461.99	47.93	-2192
505.41	-89.15	-2214
411.59	15.08	-2212
406.05	-8.03	-2208
432.22	-46.45	-2206
527.85	-87.54	-2192
293.03	-306.95	-2186
277.86	-185.31	-2180
304.71	-138.11	-2172
403.24	-153.45	-2172
491.41	-191.87	-2174
397.5	-344.82	-2214
-104.89	-108.16	-2170
-136.42	-154.2	-2174
-78.46	-164.02	-2182
-191.94	-3.76	-2176
-207.81	-170.35	-2178
-204.78	-182.43	-2190
-235.18	-104.44	-2202
-98.09	-147.15	-2212
-287.47	-141.95	-2210
-151.36	-180.22	-1898
320.32	338.42	-1890
283.61	137.99	-1892
237.9	162.66	-1900
245.16	113.79	-1902
93.17	175.97	-1898
380.49	199.37	-1918
230.67	163.28	-1922
147.26	286.1	-1924
361.42	-169.56	-1892
376.74	48.73	-1898
327.6	-68.25	-1902
305.91	30.52	-1900
455.35	-165.96	-1904
321.77	18.91	-1914
-269.14	-169.08	-1606
-271.04	-104.43	-1614
-169.32	-112.28	-1618
50.26	-5.53	-1612
74.08	-88.4	-1642
226.65	-38.55	-1612
459.51	-118.38	-1612
569.82	-115.56	-1614
399.55	-55.82	-1616
478.34	-345.28	-1622
596.31	-101.44	-1624
523.34	-95.63	-1622
409.09	-43.42	-1628
612.73	-28.89	-1630
619.86	-133.02	-1630
462.09	-22.8	-1640
543.82	-52.18	-1642
507.61	-268.32	-1640
388.53	118.03	-1606
193.93	218.66	-1608
505.64	245.98	-1612
541.51	199.5	-1620
299.59	143.85	-1616
433.22	376.91	-1624
440.58	218.35	-1622
145.43	180.03	-1626
180.95	313.83	-1626
393.74	247.74	-1626
419.45	212.55	-1630
352.81	196.08	-1630
274.83	469.59	-1632
304.18	217.9	-1640
218.45	140.08	-1642
387.43	326.09	-1642
502.12	367.8	-1642
690.259	90.3379	-1606.95
788.913	-18.7498	-1601.39
496.875	-220.073	-1601.39
473.884	-51.7815	-1604.17
524.371	-34.5942	-1604.17
454.533	-36.5711	-1604.17
515.795	7.90802	-1604.17
166.385	-10.6518	-1606.95
117.224	43.7309	-1606.95
171.463	68.6758	-1604.17
299.799	124.155	-1606.95
389.972	269.985	-1606.95
238.275	-16.9677	-1601.39
74.0737	42.2204	-1604.17
37.0603	32.6971	-1601.39
-106.757	-184.921	-1604.17
-209.572	-204.095	-1606.95
-314.818	-98.9572	-1604.17
-498.068	-145.793	-1604.17
-510.724	-84.4102	-1681.39
-368.115	146.049	-1684.17
-398.573	175.77	-1681.39
-296.57	-101.994	-1681.39
-230.539	-96.881	-1681.39
71.3401	0.033546	-1681.39
120.782	-96.0075	-1681.39
291.185	-25.3842	-1681.39
326.225	-22.7532	-1681.39
304.763	9.97074	-1681.39
226.553	-31.7863	-1681.39
259.313	-115.036	-1681.39
409.781	-90.7264	-1681.39
422.238	-24.5794	-1681.39
405.492	27.0862	-1681.39
499.035	56.0022	-1681.39
547.75	91.3107	-1681.39
414.845	141.379	-1681.39
443.497	208.123	-1681.39
699.443	304.686	-1681.39
720.053	109.722	-1681.39
684.425	11.8881	-1681.39
712.781	-24.6037	-1681.39
626.541	5.7345	-1681.39
479.091	-212.847	-1681.39
393.758	-281.678	-1681.39
646.829	-32.3866	-1761.39
599.311	0.28771	-1761.39
732.057	-25.3852	-1761.39
694.32	-68.9319	-1761.39
815.893	-32.5665	-1761.39
593.211	-131.284	-1761.39
538.176	114.378	-1761.39
540.893	-228.903	-1761.39
327.274	38.7859	-1761.39
382.838	48.6262	-1761.39
330.581	140.702	-1761.39
437.646	133.319	-1761.39
469.234	219.503	-1761.39
362.738	306.889	-1761.39
214.942	212.682	-1761.39
259.668	150.352	-1761.39
188.764	161.292	-1761.39
179.624	-34.7755	-1761.39
120.464	-5.87131	-1761.39
-127.207	-170.184	-1761.39
-256.311	-176.804	-1761.39
-297.35	-140.315	-1761.39
-238.726	-63.398	-1761.39
-295.925	59.6912	-1761.39
-614.562	259.9	-1761.39
-299.094	-50.1157	-1846.95
-187.168	-92.537	-1844.17
-194.382	-216.877	-1841.39
-324.196	-213.959	-1849.73
-392.901	-139.596	-1841.39
-737.245	-136.726	-1846.95
97.0403	-18.8748	-1844.17
242.384	151.15	-1841.39
308.423	72.6083	-1841.39
236.674	-14.1735	-1841.39
421.337	117.74	-1841.39
447.615	170.218	-1841.39
479.314	191.343	-1844.17
449.92	290.748	-1841.39
743.567	-5.99616	-1841.39
802.923	3.15368	-1841.39
783.142	-61.6894	-1844.17
614.668	-346.774	-1841.39
544.379	-254.871	-1841.39
122.718	12.3744	-1841.39
-145.085	0.742791	-1921.39
67.5044	-101.789	-1921.39
21.9792	-67.6184	-1921.39
92.1173	-0.632507	-1921.39
202.007	-20.3681	-1921.39
341.261	12.441	-1921.39
432.139	-72.9799	-1921.39
618.038	-222.802	-1921.39
416.895	-284.499	-1921.39
-212.185	-284.336	-1921.39
-325.409	-205.478	-1921.39
-424.319	-7.06783	-1921.39
291.095	235.801	-1921.39
422.255	116.211	-1921.39
661.791	215.998	-1921.39
656.362	197.606	-1921.39
779.098	-107.229	-1921.39
695.212	-367.34	-1921.39
-304.893	-237.398	-2001.39
-139.598	-119.267	-2001.39
-424.871	-171.851	-2001.39
-465.83	266.31	-2001.39
-127.99	243.414	-2001.39
189.545	94.9796	-2001.39
273.572	73.7119	-2001.39
100.897	11.3371	-2001.39
458.056	158.035	-2001.39
548.613	144.499	-2001.39
491.898	182.434	-2001.39
569.786	209.141	-2001.39
688.391	317.207	-2001.39
451.409	133.462	-2001.39
422.511	75.3477	-2001.39
487.492	-76.649	-2001.39
493.748	-107.782	-2001.39
534.951	-141.731	-2001.39
761.601	45.9661	-2001.39
760.443	-112.178	-2004.17
809.42	-152.56	-2001.39
527.841	-232.374	-2001.39
-326.328	-262.232	-2395.84
-226.421	-60.3592	-2393.05
-145.663	-140.902	-2390.27
-93.3366	-25.7868	-2390.27
240.2	-105.91	-2390.27
338.215	-177.769	-2387.49
487.866	-217.677	-2390.26
427.711	-75.8169	-2390.26
299.077	157.048	-2390.26
239.165	126.967	-2393.05
181.855	82.0757	-2387.49
486.581	11.2144	-2307.49
425.776	-82.437	-2310.27
498.24	-178.269	-2310.27
299.266	84.6263	-2310.27
304.811	102.266	-2310.27
290.166	173.762	-2310.27
231.834	77.5076	-2313.05
114.718	215.12	-2313.05
-128.732	-152.067	-2313.05
-184.337	-188.751	-2313.05
-204.182	-174.222	-2315.83
-331.713	-143.029	-2315.83
230.009	64.364	-2230.27
255.862	41.143	-2230.27
285.685	76.4869	-2233.05
309.931	53.3034	-2233.04
382.494	166.648	-2230.26
278.564	158.562	-2230.27
222.714	145.319	-2230.27
522.526	-182.685	-2233.04
535.972	54.0196	-2230.26
458.889	164.336	-2166.95
358.547	210.137	-2166.95
361.847	281.963	-2166.95
307.936	28.9621	-2166.95
445.879	1.25615	-2166.95
400.243	17.1344	-2169.73
503.177	28.8304	-2166.95
580.613	14.4127	-2166.95
475.299	-101.206	-2166.95
514.449	-177.047	-2169.73
564.934	-352.711	-2166.96
490.979	-348.104	-2166.95
325.532	-135.584	-2164.17
312.887	85.6794	-2166.95
240.111	159.333	-2067.49
222.04	170.69	-2067.49
154.533	121.004	-2070.27
187.54	80.1904	-2064.71
249.035	76.7992	-2064.71
242.322	106.217	-2064.71
312.664	3.49982	-2064.71
272.593	54.207	-2064.71
270.546	-14.2629	-2064.71
289.433	-87.1288	-2064.71
440.134	-120.737	-2064.71
403.208	114.443	-2064.71
501.766	38.0094	-2064.71
361.923	28.1619	-2067.49
-158.527	-0.34245	-2067.49
-142.133	-41.0359	-2067.49
-183.184	-93.7527	-2067.49
-165.616	-158.219	-2067.49
548.37	86.4792	-2064.71
40.9257	232.527	-2070.27
-191.158	-253.038	-1990.27
-487.831	301.459	-1987.49
-295.575	156.064	-1987.49
-109.082	-202.699	-1987.49
100.115	306.747	-1987.49
232.096	173.487	-1987.49
291.493	73.8575	-1987.49
240.23	79.2085	-1987.49
288.746	10.2494	-1984.71
398.907	22.9054	-1987.49
346.265	44.9524	-1987.49
371.338	65.8622	-1987.49
348.168	102.653	-1990.27
361.82	135.552	-1987.49
323.897	130.901	-1990.27
421.46	108.665	-1987.49
518.014	73.0099	-1990.27
526.198	4.60349	-1987.49
528.878	265.12	-1987.49
529.481	-133.961	-1987.49
591.872	-69.4022	-1987.49
469.212	-80.54	-1987.49
428.93	-54.1147	-1984.71
-351.489	-128.104	-1907.49
-240.542	-67.2456	-1907.49
243.624	108.822	-1907.49
99.1931	43.1822	-1910.27
350.959	202.527	-1907.49
236.398	183.895	-1907.49
94.0234	189.451	-1907.49
153.19	278.282	-1907.49
278.901	162.587	-1907.49
320.55	124.945	-1907.49
225.267	75.2895	-1907.49
402.619	8.78088	-1907.49
454.076	37.0503	-1907.49
523.984	-85.7623	-1907.49
558.474	-156.553	-1910.27
442.242	-293.524	-1907.49
670.083	66.8035	-1907.49
587.046	60.187	-1907.49
480.94	115.87	-1910.27
508.602	176.163	-1907.49
562.739	168.809	-1907.49
587.62	-119.994	-1907.49
533.127	-32.5545	-1907.49
352.032	248.545	-1830.27
216.841	112.451	-1830.27
268.6	86.1024	-1827.49
274.028	66.6365	-1827.49
289.18	25.6377	-1830.27
345.581	3.08962	-1830.27
295.702	-24.809	-1830.27
393.279	-30.7093	-1830.27
422.926	-23.6691	-1830.27
440.91	33.3925	-1830.27
429.384	49.1457	-1827.49
386.615	66.8542	-1830.27
379.904	89.342	-1830.27
95.2604	182.703	-1827.49
58.9929	1.61629	-1827.49
528.643	-27.8535	-1830.27
666.329	-10.4168	-1830.27
480.228	-179.5	-1830.27
-167.717	-100.237	-1827.49
-261.774	-35.2638	-1830.27
-217.627	94.1575	-1827.49
-273.88	3.00223	-1747.49
-391.093	94.1758	-1747.49
-653.737	382.829	-1747.49
191.854	47.0818	-1747.49
271.635	38.5102	-1744.71
179.834	251.538	-1747.49
309.153	225.79	-1747.49
381.306	271.166	-1747.49
335.726	53.9897	-1747.49
448.521	132.032	-1750.27
620.793	56.0322	-1747.49
608.002	111.141	-1747.49
559.901	-75.7028	-1750.27
522.327	-20.612	-1747.49
619.88	-120.826	-1747.49
463.367	-284.681	-1750.27
329.827	-316.549	-1750.27
486	34.653	-1747.49
312.123	160.468	-1670.27
-302.266	-172.941	-1667.49
-223.994	-268.636	-1664.71
-210.449	-74.9778	-1664.71
112.03	139.452	-1667.49
230.034	107.283	-1667.49
407.279	150.24	-1667.49
477.846	142.36	-1667.49
507.277	71.6742	-1667.49
557.012	-49.7995	-1667.49
397.391	-50.6357	-1670.27
473.741	-314.003	-1670.27
633.501	-150.053	-1670.27
672.368	-0.0849419	-1670.27
357.012	108.334	-1667.49
-252.262	5.68389	-1998.61
-231.536	13.1746	-1995.83
230.639	302.585	-1997.85
485.783	-211.338	-1993.05
-244.591	111.971	-1918.61
-262.301	74.8996	-1915.83
412.439	116.118	-1913.05
495.84	-27.1707	-1913.05
354.338	166.065	-1915.83
368.658	176.687	-1918.61
513.692	-21.367	-1838.61
485.041	-302.7	-1838.61
382.301	26.987	-1838.61
416.679	17.7165	-1838.61
254.269	131.293	-1838.61
243.721	276.48	-1838.61
586.858	-123.892	-1838.61
-77.289	402.018	-1758.61
235.732	-216.255	-1758.61
579.771	-134.294	-1758.61
570.194	-174.363	-1755.98
-325.349	-64.4519	-1675.83
81.3843	418.533	-1670.88
124.676	302.763	-1673.05
129.587	279.156	-1673.05
215.564	197.021	-1675.83
237.747	171.049	-1673.05
225.948	155.893	-1673.05
150.911	173.62	-1675.83
185.009	83.9443	-1673.05
243.58	100.708	-1673.05
334.973	132.57	-1678.61
132.445	182.18	-1678.61
169.446	156.182	-1673.05
189.468	145.494	-1673.05
179.636	118.328	-1675.83
289.63	337.365	-1672.02
300.195	320.253	-1670.27
235.102	279.973	-1670.27
508.633	-163.109	-2398.38
491.323	-125.019	-2398.38
476.541	-183.814	-2398.38
461.732	29.6282	-2398.38
402.271	94.7515	-2398.38
397.306	32.5464	-2398.38
343.271	-29.0397	-2398.38
332.176	14.8622	-2398.38
352.052	318.524	-2398.38
339.108	163.034	-2398.38
309.309	166.783	-2398.38
292.91	-23.4922	-2393.09
293.75	198.862	-2398.38
257.116	220.403	-2398.38
216.443	126.693	-2398.38
212.166	238.662	-2398.38
206.106	156.433	-2398.38
164.611	277.906	-2398.38
152.241	392.357	-2398.38
257.137	170.781	-2394.56
157.372	284.213	-2396.11
-80.5177	186.052	-2389.51
520.535	-163.936	-2318.38
502.956	18.1108	-2318.38
463.622	3.78927	-2318.38
463.168	-179.143	-2318.38
434.294	-37.2283	-2318.38
404.742	1.8179	-2318.38
349.357	-47.4538	-2318.38
407.112	116.303	-2318.38
357.42	176.203	-2318.38
315.061	125.514	-2318.38
294.236	266.02	-2318.38
280.529	139.255	-2318.38
155.191	292.929	-2318.38
106.485	177.885	-2318.38
190.946	194.753	-2314.97
-289.528	-325.758	-2318.38
-266.297	-283.153	-2309.02
-301.916	-277.379	-2308.43
-188.529	-161.482	-2318.38
-272.288	-195.063	-2318.38
-147.005	-65.4249	-2311.18
765.591	-105.222	-2238.38
506.376	-218.314	-2238.38
458.146	-238.497	-2238.38
502.916	129.366	-2238.38
500.892	-103.618	-2238.38
418.678	-88.9807	-2238.38
382.988	67.92	-2238.38
344.405	246.418	-2238.38
203.786	-51.9227	-2238.38
293.86	135.491	-2238.38
249.92	440.472	-2238.38
240.161	432.787	-2238.38
240.469	143.753	-2238.38
228.335	168.577	-2238.38
195.264	347.214	-2238.38
258.634	137.134	-2234.9
-280.623	113.714	-2230.13
-404.306	238.001	-2230.98
-405.227	220.792	-2230.78
-398.683	267.082	-2227.65
-437.518	355.815	-2230.14
-607.295	374.798	-2228.77
383.68	-13.5406	-2153.91
519.368	-140.193	-2151.25
488.232	28.1388	-2152.31
479.46	-34.5372	-2148.23
351.609	24.6106	-2150.01
422.751	61.5883	-2151.18
387.864	336.848	-2150.57
358.191	232.886	-2153.01
353.336	68.1506	-2152.29
320.429	235.815	-2151.13
501.675	187.567	-2148.05
343.97	106.871	-2149.02
268.019	21.8872	-2150.06
244.811	13.9728	-2149.46
203.459	35.714	-2147.38
297.981	144.783	-2152.53
275.831	215.06	-2151.31
127.812	351.12	-2151.11
249.529	134.268	-2150.2
-302.337	-187.558	-2148.21
-246.747	484.853	-2147.22
-351.199	-197.183	-2147.6
659.893	316.099	-2146.67
380.389	-225.149	-2144.93
500.731	299.708	-2145.16
443.222	131.024	-2145.76
218.892	95.0481	-2142.18
115.227	323.268	-2142.18
226.547	417.477	-2142.18
-278.409	-206.268	-2146.04
-271.048	470.671	-2145.11
-277.616	493.164	-2146.62
-276.992	438.034	-2142.18
625.145	-194.295	-2073.07
419.815	-233.037	-2078.38
565.626	-231.231	-2074.9
530.752	64.4959	-2078.38
527.966	-56.5229	-2078.38
466.369	39.9526	-2078.38
445.468	13.9454	-2078.38
389.328	94.4597	-2078.38
387.653	107.987	-2078.38
376.937	57.5959	-2078.38
360.708	110.924	-2078.38
347.991	96.5443	-2078.38
346.327	4.74445	-2078.38
327.07	36.8673	-2078.38
494.996	82.3687	-2074.17
370.345	-30.0612	-2075.09
451.218	-58.8898	-2072.07
306.66	62.197	-2071.91
504.853	-202.155	-2068.52
382.656	4.12857	-2070.27
572.069	242.219	-2078.38
558.661	158.626	-2078.38
511.588	219.207	-2078.38
461.897	189.686	-2078.38
438.061	185.068	-2078.38
400.913	146.9	-2078.38
355.748	233.947	-2078.38
309.775	374.768	-2078.38
299.704	231.694	-2078.38
538.775	151.014	-2075.11
350.775	283.79	-2076.06
549.318	233.569	-2071.76
290.08	57.6564	-2076.24
292.629	-40.3111	-2069
288.971	249.764	-2078.38
278.271	273.591	-2078.38
279.641	164.618	-2078.38
239.816	416.925	-2078.38
227.799	272.538	-2071.03
202.425	226.901	-2070.32
86.053	302.676	-2073.52
-273.558	-253.81	-2078.38
-211.917	-246.497	-2069.34
-273.254	-272.134	-2068.24
-147.175	-185.87	-2071.36
-262.532	395.214	-2075.23
-280.89	383.532	-2074.13
-272.504	405.708	-2070.83
-204.704	498.424	-2078.38
-229.441	483.421	-2075.5
-184.796	61.6851	-2065.86
448.77	-192.904	-1996.26
368.998	83.1745	-1998.38
582.989	118.314	-1994.8
343.646	84.5877	-1995.47
316.985	15.8138	-1993.17
370.359	192.522	-1992.96
359.072	221.437	-1992.46
343.467	208.058	-1990.5
257.186	99.1005	-1998.38
104.686	98.4567	-1998.38
155.763	68.8107	-1996.04
280.942	156.462	-1998.38
276.231	344.209	-1998.38
277.23	219.464	-1998.38
261.156	283.953	-1998.38
226.33	267.156	-1998.38
92.4939	277.051	-1998.38
244.56	176.5	-1994.6
243.925	159.086	-1993.84
184.035	336.244	-1994.73
80.0125	271.434	-1995.61
42.8519	166.974	-1993.77
181.739	270.546	-1992.48
150.96	292.055	-1988.45
-204.029	-209.207	-1998.38
-318.509	-190.543	-1992.18
-97.1289	-197.382	-1989.92
-387.669	58.655	-1998.38
-393.582	78.564	-1998.38
-416.426	82.737	-1998.38
-428.463	87.2618	-1993.55
512.746	69.1726	-1918.38
442.134	-174.737	-1918.38
403.082	-77.0966	-1918.38
347.609	98.9026	-1918.38
331.319	6.47292	-1918.38
563.587	107.422	-1914.59
518.154	-63.5029	-1913.14
440.307	52.6289	-1910.4
402.912	-40.0441	-1911.63
379.67	85.3315	-1910.26
452.733	135.119	-1918.38
347.061	174.865	-1918.38
343.022	117.669	-1918.38
303.864	202.68	-1918.38
300.125	346.016	-1914.85
288.405	28.2027	-1918.38
134.053	-145.301	-1918.38
248.628	-29.8936	-1912.93
281.001	183.341	-1918.38
267.39	194.024	-1918.38
247.689	142.245	-1918.38
203.073	304.883	-1918.38
183.733	275.949	-1918.38
165.207	264.446	-1918.38
-7.2062	267.362	-1918.38
151.448	296.783	-1910.53
-211.44	-228.75	-1918.38
-242.622	-42.6635	-1910.66
-98.6397	-135.444	-1908.69
-352.66	-354.058	-1918.38
592.501	300.574	-1831.53
437.258	-47.2551	-1838.38
412.907	4.5903	-1838.38
406.243	33.9262	-1838.38
387.799	34.0487	-1838.38
353.118	28.8506	-1838.38
349.789	-142.842	-1838.38
345.144	-8.78831	-1838.38
343.197	-104.907	-1838.38
340.732	16.4041	-1838.38
328.306	40.0263	-1838.38
327.049	-0.380917	-1838.38
288.731	92.3081	-1838.38
285.109	32.0541	-1838.38
266.994	108.222	-1838.38
258.775	101.596	-1838.38
505.58	117.356	-1834.4
288.565	123.671	-1836.51
518.167	177.051	-1838.38
488.982	181.55	-1838.38
480.211	322.388	-1838.38
398.942	373.746	-1838.38
383.283	282.283	-1838.38
383.685	295.019	-1838.38
314.902	163.621	-1838.38
318.677	394.703	-1833.17
247.735	91.5273	-1838.38
247.792	112.184	-1838.38
244.193	67.6864	-1838.38
237.497	43.5498	-1838.38
231.881	106.778	-1838.38
115.842	0.745112	-1830.93
227.992	152.613	-1838.38
175.441	154.226	-1838.38
114.223	297.88	-1838.38
218.542	259.335	-1832.26
199.93	242.765	-1831.69
-154.905	519.008	-1835.93
555.218	-66.7211	-1758.38
542.044	-2.27758	-1758.38
533.406	-103.518	-1758.38
482.991	-3.20717	-1758.38
472.646	1.24647	-1758.38
461.2	-4.07216	-1758.38
661.543	135.911	-1758.38
558.158	161.826	-1758.38
540.602	181.343	-1758.38
517.201	219.584	-1758.38
497.99	221.302	-1758.38
472.965	251.933	-1758.38
474.074	203.431	-1758.38
461.37	141.834	-1758.38
456.29	217.463	-1758.38
441.227	129.414	-1758.38
431.824	276.932	-1758.38
427.689	223.744	-1758.38
423.123	131.537	-1758.38
408.128	22.8233	-1758.38
376.739	97.2481	-1758.38
225.507	92.6663	-1758.38
384.906	70.0745	-1754.73
387.105	301.167	-1758.38
380.152	135.135	-1758.38
292.014	238.633	-1758.38
296.005	144.489	-1758.38
290.881	118.861	-1758.38
272.311	170.023	-1758.38
272.9	127.751	-1758.38
272.163	113.914	-1758.38
270.053	154.362	-1758.38
240.943	255.996	-1758.38
213.603	372.087	-1758.38
207.828	230.435	-1758.38
202.024	321.515	-1758.38
181.308	185.072	-1758.38
105.553	395.498	-1758.38
313.651	259.956	-1756.12
-158.061	-308.023	-1758.38
-95.7738	-115.617	-1758.38
-107.486	31.9586	-1758.38
-97.9874	-204.618	-1758.38
-166.84	-22.3274	-1758.38
-138.85	480.544	-1754.5
-228.102	-375.711	-1758.38
-241.417	-217.082	-1758.38
391.983	-390.064	-1678.38
479.12	-23.8188	-1678.38
465.557	-86.5726	-1678.38
399.701	-26.5196	-1678.38
471.591	123.764	-1678.38
459.884	398.482	-1678.38
416.889	162.935	-1678.38
405.231	191.427	-1678.38
386.524	258.985	-1678.38
379.183	160.228	-1678.38
357.677	255.036	-1678.38
344.462	212.864	-1678.38
286.298	89.3955	-1678.38
250.901	74.083	-1678.38
244.779	-3.92776	-1678.38
244.287	41.8177	-1678.38
199.342	67.0375	-1678.38
122.466	-18.7753	-1678.38
103.021	53.5991	-1678.38
251.681	134.889	-1678.38
216.505	158.675	-1678.38
208.804	173.428	-1678.38
205.804	266.726	-1678.38
168.496	354.452	-1678.38
-160.025	-127.144	-1678.38
