# Supplementary material for: Spinal premotor interneurons controlling antagonistic muscles are spatially intermingled
Source: eLife. 2022 Dec 13;11:e81976. doi: 10.7554/eLife.81976 (PMC9844990; doi:10.7554/eLife.81976)
Supplement: Figure 3—figure supplement 2—source data 9. [file elife-81976-fig3-figsupp2-data9.xlsx]

## Sheet: Sheet1
-253.69	-285.54	-1424
-272.28	-306.52	-1432
-393.91	316.95	-1412
188.28	311.59	-1412
409.95	247.13	-1414
179.09	276.78	-1416
493.53	345.9	-1418
149.5	161.97	-1414
407.43	162.74	-1414
397.29	12.9	-1422
246.61	99.02	-1420
283.67	21.89	-1424
169.73	140.26	-1426
494.81	236.46	-1424
479.14	221.62	-1426
429.53	181.52	-1430
505.57	224.38	-1432
559.93	1.06	-1434
683.2	34.97	-1436
350.85	43.77	-1434
284.72	89.17	-1432
267.42	38.12	-1434
237.98	16.42	-1430
299.22	92.14	-1436
206.26	144.35	-1438
354.21	192.1	-1440
440.08	190.46	-1440
356.14	3.35	-1438
532.08	72.4	-1442
394.45	152.99	-1440
370.18	302.45	-1442
270.79	104.3	-1436
434.68	-174.16	-1416
419.72	-272.49	-1424
355.13	-207.12	-1426
90.18	-48.16	-1430
163.27	-73.36	-1436
439.75	-245.93	-1428
410.73	-225.76	-1430
473	-331.04	-1432
469.12	-206.97	-1434
708.63	-252.31	-1430
689.79	-67.6	-1436
597.77	-39.46	-1434
502.84	-72.14	-1436
428.57	-321.68	-1442
553.04	-215.54	-1440
438.49	-362.92	-1438
474.09	-26.11	-1430
-520.49	240.79	-1168
-556.71	0.62	-1168
-416.22	283.89	-1176
-550.55	-98.83	-1188
-155.04	-158.96	-1174
-212.86	-210.89	-1180
-158.12	-242.7	-1182
-206.28	-222.09	-1180
-170.52	-190.23	-1184
-205.79	-276.56	-1194
-270.13	-121.02	-1198
74.41	21.41	-1200
219.17	-126.29	-1200
274.47	-25.55	-1186
451.48	197.46	-1168
549.07	26.61	-1168
342.94	195.26	-1174
338.74	30.57	-1178
442.95	51.16	-1178
447.9	168.53	-1182
277.43	79.84	-1190
422.79	220.93	-1196
328.6	194.52	-1196
389.35	164.25	-1196
385.79	208.88	-1196
494.92	224.22	-1200
488.5	176.54	-1200
405.61	152.4	-1198
425.03	37.98	-1198
340.69	50.12	-1200
199.41	240.29	-1198
154.73	114.53	-1194
425.7	164.43	-1194
460.44	171.29	-1196
184.15	126.2	-1192
571.61	138.96	-1192
536.58	113.06	-1176
340.29	148.19	-1170
467.56	205.48	-1186
219.11	374.91	-1198
389.85	-22.57	-1170
609.74	-100.97	-1172
499.76	-124.19	-1176
390.38	-96.01	-1168
497.47	-67.09	-1170
379.11	-230.53	-1174
435.27	-298.5	-1180
615.78	-41.49	-1176
575.39	-178.81	-1180
466.63	-149.95	-1186
374.96	-61.7	-1186
554.68	-382.72	-1190
620.24	-380.65	-1194
317.33	-142.03	-1196
506.48	-153.75	-1200
695.05	-192.15	-1172
-308.09	-257.02	-938
-117.11	-95.8	-934
-138.25	-114.2	-942
-292.19	-304.73	-958
-279.28	-254.3	-958
-217.56	-235.12	-962
444.75	204.66	-930
520.41	236.46	-932
386.49	208.63	-934
399.84	214.8	-934
334.34	247.42	-934
569.27	131.34	-936
371.22	222.27	-938
288.38	151.45	-936
243.91	96.24	-932
366.72	170.47	-934
386.42	281.08	-940
398.63	321.67	-940
556.88	262.33	-944
601.88	267.3	-944
700.66	138.89	-948
447.95	170.7	-950
257.15	322.94	-946
296.3	136.63	-946
435.61	151.23	-942
444.9	198.27	-944
369.57	97.96	-950
351.87	99.27	-954
273.81	208.37	-954
331.29	138.86	-958
196.01	204.79	-958
576.27	29.1	-942
317.47	76.58	-942
123.24	268.32	-948
368.28	287.92	-954
404.97	233.29	-956
466.57	252.63	-954
555.79	219.26	-958
605.88	77.14	-962
382.73	196.41	-960
337.83	216.56	-954
398.94	165.18	-954
587.85	237.9	-952
432.65	209.57	-962
360.07	136.15	-962
321.51	262.74	-960
147.88	218.23	-964
450.91	261.17	-960
422.82	115.64	-956
276.74	67.47	-944
539.65	32.11	-936
335.94	152.89	-966
391.15	154.09	-966
455.39	147.84	-966
165.73	124.03	-966
310.69	173.23	-958
409	-46.96	-930
429.98	-108.19	-936
73.59	36.27	-932
531.12	-21.03	-934
375.99	-162.11	-934
420.46	-210.73	-938
486.28	6.6	-938
550.13	-0.8	-942
444.03	-115.85	-948
497.36	-199.21	-948
358.1	-96.04	-950
279.08	47.79	-954
468.61	-199.48	-960
375.89	24.28	-962
282.14	64.13	-964
194.42	80.02	-966
239.18	-67.38	-964
456.13	-283.03	-962
709.69	-16.95	-962
642.65	-87.68	-960
416.58	-338.75	-930
502.61	-443.54	-942
507.26	-378.16	-944
447.92	-341.23	-946
404.49	-354.91	-956
477.27	-376.65	-958
-209.95	-123.76	-1414
204.2	416.47	-1408
193.62	120.37	-1420
299.37	149.61	-1420
355.66	273.61	-1420
110.49	274.93	-1432
335.24	325.57	-1436
380.54	226.63	-1440
346.1	241.99	-1438
120.89	285.39	-1438
157.36	341.53	-1442
391.07	239.76	-1426
445.61	-54.99	-1410
539.39	-39.76	-1412
477.53	25.38	-1414
517.61	-90.73	-1418
360.51	-9.1	-1420
448.83	28	-1418
253.59	-46.04	-1422
247.14	63.36	-1430
524.92	-10.77	-1430
458.86	62.7	-1426
458.19	-116.4	-1428
403.86	5.96	-1430
480.31	32.09	-1432
345.55	61.57	-1436
379	81.02	-1444
470.28	50.12	-1444
422.68	27.83	-1444
337.61	-48.04	-1410
522.62	-204.29	-1434
29.46	-88.34	-1184
-111.2	-68.28	-1178
-227.59	-226.53	-1174
-193.88	-270.45	-1168
-501.17	-224.59	-1168
-130.2	-196.62	-1178
452.04	76.73	-1200
520.07	206.68	-1200
235.37	266.11	-1198
287.39	271.55	-1200
314.98	67.88	-1202
132.23	222.52	-1196
304.17	159.3	-1194
259.69	97.86	-1190
149.36	106.94	-1184
377.71	164.04	-1184
415.28	235.28	-1194
558.77	295.29	-1196
583.17	61.83	-1190
466.91	67.35	-1192
446.11	258.27	-1176
522.42	148.03	-1176
154.32	180.24	-1174
188.25	189.67	-1170
192.25	264.13	-1172
670.62	-101.4	-1198
636.45	-184.03	-1196
346.57	-133.34	-1198
497.6	-128.35	-1192
442.33	1.99	-1188
315.14	-61.43	-1186
657.46	-152.52	-1186
364.85	-5.72	-1180
258.3	-100.53	-1178
579.98	-5.21	-1178
638.19	17.07	-1178
597.1	-54.71	-1172
651.58	-229.11	-1170
682.43	-206.99	-1174
730.46	-355.62	-1194
725.16	-406.56	-1198
698.51	-360.05	-1172
436.49	-315.8	-1166
491.75	-419.79	-1166
-221.86	-193.37	-932
-119.24	-184.61	-940
-439.03	-66.34	-938
-392.9	-244.5	-950
-264.34	-317.45	-946
-190.71	-190.43	-952
-353.46	-241.36	-960
-209.15	-187.4	-962
16.33	-66.35	-958
-160.43	-196.81	-960
171.48	277.62	-960
196.21	245.04	-960
604.19	175.26	-956
336.31	165.36	-954
516.72	267.11	-950
519.03	305.01	-952
495.7	367	-956
245.23	151.83	-950
220.59	197.52	-958
350.87	201.24	-950
445.97	242.85	-948
311.17	200.25	-940
441.84	351.64	-938
225.7	171.63	-938
241.1	199.32	-940
317.9	263.92	-942
400.85	194.49	-940
446.38	203.04	-942
434.36	186.66	-942
460.76	212.7	-940
127.52	130.67	-940
506.94	248.14	-934
418.74	187.5	-934
159.32	279.07	-930
179.09	104.57	-930
296.63	358.41	-930
229.1	588.24	-934
613.22	276.83	-934
486.36	365.96	-932
227.82	159.5	-942
519.67	222.99	-946
538.64	213.21	-944
502.86	203.39	-938
178.66	30.1	-928
469.67	-137.27	-928
621.17	40.92	-930
571.58	137.15	-928
435.7	105.45	-932
308.82	27.56	-930
262.28	-14.29	-930
540.99	33.47	-936
589.72	116.44	-938
192.64	-1.64	-940
200.2	78.35	-942
384.81	8.05	-950
495.53	-19.9	-950
498.96	-90.48	-952
239.62	61.82	-954
155.56	36.37	-950
570.65	32.56	-948
474.88	109.02	-946
517.32	53.68	-956
346.54	52.88	-956
582.44	125.93	-958
542.56	-247.86	-946
341.93	-274.45	-946
379.49	-285.18	-946
616.05	-289.47	-950
442.44	-274.92	-956
557.3	-159.57	-958
317	-346.5	-960
675.48	-227.82	-920
409.72	-132.89	-932
-741.026	264.463	-806.95
-480.57	-29.8741	-812.51
-230.876	-226.485	-815.29
-147.625	-155.056	-806.95
-149.891	-129.107	-815.29
-304.074	-196.712	-815.29
149.816	18.4591	-809.73
355.486	-291.052	-804.17
400.863	-219.473	-812.51
465.423	-266.6	-804.17
550.738	-155.802	-804.17
525.846	-77.0416	-815.29
553.078	-179.437	-804.17
736.353	33.3232	-812.51
761.667	32.0943	-812.51
730.671	100.419	-806.95
293.479	70.4202	-812.51
181.165	208.256	-806.95
453.173	121.294	-815.29
532.348	99.858	-815.29
801.974	53.1851	-884.17
741.388	-12.6855	-881.39
617.645	-16.3103	-881.39
608.907	22.2432	-886.95
689.545	48.1158	-881.39
571.71	-22.7323	-884.17
517.172	11.7005	-886.95
434.021	-54.4777	-886.95
484.093	-148.321	-886.95
433.889	-269.544	-881.39
615.457	-333.95	-884.17
685.591	-351.845	-881.39
375.39	7.74714	-881.39
421.261	15.6269	-881.39
518.211	98.9298	-884.17
547.661	123.31	-884.17
617.736	111.221	-884.17
501.797	175.142	-886.95
533.009	224.739	-886.95
641.313	231.516	-881.39
736.448	299.755	-886.95
450.931	327.239	-886.95
211.021	146.974	-886.95
120.854	4.27411	-886.95
-35.7828	44.6721	-889.73
-302.346	-158.257	-881.39
-325.001	-231.6	-884.17
326.23	193.474	-884.17
-349.252	-271.453	-961.39
-575.949	-41.9599	-972.51
-215.914	-209.807	-972.51
-229.087	-180.06	-969.73
230.838	-242.355	-969.73
447.331	-92.9377	-969.73
530.756	-158.194	-969.73
633.897	-86.9006	-961.39
703.976	-23.7052	-961.39
729.208	-61.8069	-966.95
642.406	63.6228	-966.95
625.054	63.8557	-966.95
534.688	-24.4545	-966.95
482.803	-19.9244	-969.73
444.798	60.9314	-966.95
376.937	69.6846	-969.73
429.301	98.3773	-969.73
426.621	122.814	-964.17
438.685	140.198	-961.39
334.709	154.956	-961.39
238.1	210.686	-966.95
333.75	293.581	-966.95
767.852	-43.2693	-961.39
-529.073	245.849	-1049.73
-672.943	-124.273	-1049.73
-431.167	-133.398	-1049.73
-349.425	-148.033	-1046.95
-254.124	-128.904	-1044.17
-182.819	-142.559	-1049.73
-208.443	-229.489	-1046.95
-335.784	-283.203	-1041.39
72.4057	20.2826	-1044.17
127.612	53.693	-1046.95
167.159	62.5877	-1046.95
384.745	49.942	-1041.39
433.661	140.523	-1046.95
417.482	181.081	-1044.17
276.646	234.955	-1049.73
299.048	171.315	-1044.17
481.703	165.115	-1044.17
547.345	191.961	-1046.95
534.339	243.039	-1041.39
640.707	52.3265	-1044.17
555.874	29.237	-1046.95
481.931	-31.4014	-1044.17
963.626	-241.202	-1049.73
785.18	7.41741	-1041.39
-597.558	-147.825	-1124.17
-563.558	1.50174	-1121.39
-238.137	-266.681	-1126.95
135.679	-125.421	-1121.39
460.038	-102.167	-1121.39
431.657	-73.3093	-1121.39
578.708	65.9198	-1121.39
715.574	85.5665	-1121.39
738.655	46.3476	-1121.39
745.626	-47.3658	-1121.39
435.811	99.6551	-1121.39
412.112	82.9172	-1124.17
384.858	92.2545	-1124.17
385.557	157.316	-1121.39
458.278	150.163	-1124.17
419.704	190.845	-1121.39
478.281	190.346	-1121.39
490.265	233.139	-1124.17
559.092	201.365	-1121.39
407.713	305.413	-1121.39
508.283	342.278	-1121.39
387.301	206.73	-1121.39
287.206	77.5067	-1121.39
194.018	138.135	-1121.39
471.536	18.7044	-1121.39
482.497	80.9247	-1209.73
478.015	14.1489	-1204.17
558.137	-37.4326	-1206.95
545.802	-19.791	-1206.95
573.734	-80.0902	-1201.39
582.385	-153.084	-1204.17
548.491	-231.126	-1201.39
493.14	-60.6629	-1209.73
541.905	225.995	-1204.17
556.502	304.202	-1209.73
465.551	202.716	-1204.17
450.505	179.208	-1204.17
448.388	196.811	-1204.17
442.562	235.703	-1201.39
433.158	151.491	-1209.73
435.508	165.91	-1204.17
368.898	273.931	-1204.17
329.645	110.942	-1206.95
249.9	93.5795	-1209.73
-138.158	-106.393	-1204.17
-198.143	-108.657	-1209.73
-214.998	-231.786	-1204.17
-323.29	-202.854	-1206.95
-498.237	-215.212	-1212.51
-160.284	-220.777	-1289.73
-91.4882	-273.421	-1289.73
-237.996	-222.051	-1284.17
-224.956	-136.146	-1286.95
-117.852	-0.646376	-1286.95
-360.395	-16.8769	-1295.29
167.815	144.913	-1286.95
140.068	33.5934	-1286.95
255.326	-34.5329	-1284.17
358.34	-58.1003	-1286.95
490.763	-10.9831	-1284.17
460.365	-103.781	-1284.17
613.615	-26.5197	-1286.95
695.965	-80.0338	-1281.39
878.185	-127.274	-1286.95
747.379	-46.9085	-1284.17
655.914	79.5692	-1286.95
598.838	211.495	-1289.73
634.554	201.063	-1289.73
651.749	203.787	-1289.73
622.792	280.634	-1286.95
503.948	145.279	-1284.17
526.276	125.325	-1286.95
335.921	303.385	-1284.17
237.904	202.146	-1286.95
247.34	148.111	-1284.17
564.607	227.425	-1286.95
-847.273	-144.379	-1361.39
-408.009	-182.654	-1361.39
-198.494	-92.2473	-1372.51
-132.807	-191.938	-1369.73
-206.619	-251.63	-1361.39
-68.0805	-230.538	-1361.39
-387.628	92.5847	-1364.17
-230.021	-138.947	-1375.29
219.03	-6.45656	-1364.17
335.666	-78.9825	-1361.39
498.643	-75.771	-1366.95
685.556	-61.7063	-1366.95
664.785	-6.62768	-1364.17
518.581	-0.397392	-1361.39
573.02	38.0328	-1366.95
658.142	84.2369	-1364.17
737.659	95.7309	-1366.95
743.344	63.3251	-1361.39
791.13	200.516	-1366.95
613.351	200.843	-1366.95
608.082	235.107	-1366.95
539.66	258.881	-1372.51
509.828	239.032	-1369.73
464.54	200.517	-1364.17
353.554	93.6316	-1364.17
468.518	330.379	-1361.39
622.481	-20.1297	-1444.17
656.113	89.4686	-1446.95
563.67	142.072	-1444.17
507.767	199.637	-1441.39
506.196	239.026	-1444.17
499.661	257.339	-1444.17
439.365	286.703	-1446.95
435.456	273.683	-1446.95
271.25	291.562	-1444.17
220.637	212.092	-1441.39
206.073	134.147	-1444.17
441.948	-148.863	-1449.73
567.732	-151.524	-1444.17
459.255	-335.799	-1446.95
473.075	-249.31	-1452.51
78.2663	-52.8379	-1444.17
-110.37	-129.088	-1452.51
-279.593	-27.9062	-1446.95
-204.863	-212.636	-1444.17
-479.694	-174.768	-1452.51
-533.31	-142.846	-1529.73
-292.24	-155.044	-1529.73
-173.947	-133.804	-1526.95
-143.078	-208.726	-1526.95
-204.564	-219.63	-1532.51
-135.914	-236.235	-1532.51
-228.162	18.4644	-1529.73
-559.276	246.382	-1529.73
138.678	15.7037	-1529.73
232.592	114.472	-1526.95
220.524	152.867	-1532.51
171.715	211.105	-1529.73
234.474	-24.0987	-1529.73
354.139	20.4261	-1526.95
410.954	33.3486	-1529.73
457.692	-25.8195	-1526.95
375.391	-141.366	-1529.73
496.861	60.9565	-1526.95
544.319	-14.0995	-1529.73
602.535	-50.1365	-1529.73
711.136	-57.75	-1532.51
726.997	-44.5831	-1529.73
814.919	-114.157	-1529.73
856.426	-106.27	-1529.73
771.175	-12.1138	-1529.73
766.466	54.019	-1526.95
651.677	-4.90285	-1532.51
676.107	-148.209	-1529.73
533.37	127.03	-1526.95
407.584	112.419	-1526.95
367.511	147.218	-1526.95
638.587	275.905	-1529.73
515.251	298.625	-1532.51
524.404	323.227	-1532.51
477.812	-299.77	-1524.17
-187.755	-214.983	-1584.71
-237.901	-240.418	-1584.71
-272.904	-318.317	-1584.71
-182.719	0.457696	-1584.71
96.9005	71.5532	-1587.49
381.024	111.577	-1587.49
404.313	283.842	-1590.27
436.066	237.802	-1587.49
394.513	190.577	-1587.49
460.983	184.299	-1587.49
553.607	151.197	-1587.49
705.595	76.6803	-1590.27
695.422	-63.6165	-1590.27
678.048	-139.631	-1590.27
550.131	-13.4365	-1590.27
499.982	-30.3845	-1587.49
430.751	-6.30083	-1587.49
450.549	17.3167	-1587.49
488.946	41.8251	-1587.49
467.059	-4.10593	-1590.27
430.295	-354.209	-1587.49
-132.799	34.3663	-1504.48
244.16	100.341	-1509
111.108	78.6775	-1507.39
175.985	162.691	-1507.35
171.513	191.72	-1503.48
267.16	227.312	-1508.71
325.892	154.018	-1507.4
262.046	174.161	-1508.06
383.232	123.215	-1506.53
505.916	153.276	-1508.86
551.936	165.256	-1512.58
679.414	109.278	-1509.04
504.801	240.927	-1502.03
441.244	287.426	-1505.82
412.197	54.5593	-1507.07
394.869	35.956	-1503.35
493.302	50.5051	-1509.49
341.836	47.744	-1506.99
316.967	89.8416	-1507.27
241.627	26.7543	-1507.58
312.381	-0.242146	-1509.98
309.808	-83.2354	-1507.96
504.801	-316.341	-1508.24
-62.52	-169.82	-1424.71
202.18	76.9023	-1427.49
298.981	43.5894	-1430.27
282.882	76.466	-1427.49
321.997	80.5849	-1427.49
353.784	46.836	-1424.71
369.641	94.7304	-1427.49
438.071	109.084	-1427.49
426.889	168.62	-1427.49
556.568	180.371	-1430.27
444.72	303.734	-1424.71
277.248	289.634	-1424.71
160.029	270.337	-1427.49
158.88	245.472	-1427.49
163.879	209.485	-1427.49
193.558	133.251	-1430.27
337.665	156.544	-1427.49
397.265	-147.314	-1427.49
435.924	-25.6604	-1424.71
459.838	-183.454	-1430.27
490.279	-176.208	-1427.49
721.234	-93.855	-1430.27
597.987	-177.103	-1430.27
469.24	-56.6078	-1430.27
393.358	144.681	-1350.27
369.491	167.956	-1347.49
445.376	244.849	-1347.49
367.816	303.202	-1347.49
252.301	194.859	-1350.27
277.502	56.8765	-1347.49
257.547	38.6645	-1347.49
326.368	52.0492	-1347.49
387.645	85.1259	-1350.27
457.903	114.393	-1350.27
476.878	-222.976	-1353.05
426.216	-216.144	-1347.49
442.603	-361.249	-1350.27
56.6993	44.8106	-1347.49
334.791	120.837	-1347.49
-173.73	-204.379	-1347.49
-166.134	-250.909	-1347.49
-106.358	-174.738	-1344.71
-377.149	-154.118	-1344.71
-370.179	46.9357	-1347.49
-490.907	201.81	-1344.71
-220.95	-338.774	-1347.49
-236.105	-152.569	-1264.71
233.937	-3.00868	-1264.71
296.386	5.93861	-1267.49
310.053	17.8912	-1267.49
321.977	8.71414	-1267.49
336.865	66.4521	-1270.27
328.366	104.084	-1264.71
380.915	101.798	-1267.49
411.675	91.9567	-1264.71
478.199	62.3483	-1267.49
561.295	35.602	-1270.27
397.014	258.247	-1264.71
246.414	107.618	-1267.49
210.317	39.9938	-1267.49
116.98	29.5601	-1267.49
123.607	88.1324	-1270.27
480.757	-177.084	-1267.49
499.208	-211.729	-1264.71
542.219	-392.913	-1267.49
521.617	116.792	-1270.27
388.603	50.3683	-1267.49
99.8955	8.19372	-1187.49
182.354	-90.4781	-1187.49
273.168	48.1338	-1187.49
318.455	140.749	-1187.49
344.292	135.218	-1187.49
257.902	391.921	-1187.49
467.829	208.66	-1184.71
518.958	207.922	-1190.27
662.362	152.468	-1187.49
494.658	12.3135	-1187.49
442.925	12.1339	-1190.27
416.903	3.85568	-1190.27
447.448	-37.1338	-1190.27
479.93	-55.6838	-1187.49
569.821	13.8796	-1187.49
592.788	-19.258	-1190.27
651.222	23.1093	-1190.27
490.962	-328.625	-1187.49
634.888	-280.495	-1184.71
-490.553	314.98	-1107.49
-106.866	-123.397	-1110.27
-7.42583	-62.7843	-1104.71
38.5602	-24.7453	-1110.27
139.503	87.6287	-1110.27
148.299	13.8731	-1104.71
190.313	91.0783	-1107.49
221.854	68.0785	-1107.49
270.902	54.729	-1107.49
250.067	5.31607	-1110.27
259.172	-77.7619	-1107.49
357.559	-7.61404	-1107.49
358.305	60.2536	-1104.71
374.647	6.56959	-1107.49
392.181	11.8685	-1104.71
391.046	-55.8174	-1104.71
487.179	-17.1233	-1107.49
466.872	-76.3274	-1107.49
440.681	-151.54	-1107.49
449.925	112.067	-1110.27
461.616	134.944	-1110.27
403.525	146.641	-1110.27
337.905	232.138	-1104.71
328.735	131.826	-1104.71
259.194	138.021	-1104.71
425.919	-315.122	-1104.71
50.4504	-18.0804	-1107.49
-261.438	-28.7065	-1024.71
-399.942	-2.48571	-1024.71
-13.4895	-110.756	-1021.93
-113.037	-208.604	-1024.71
172.102	125.934	-1027.49
124.324	73.8507	-1024.71
56.3901	14.5531	-1027.49
89.7798	296.195	-1027.49
402.38	246.593	-1027.49
495.055	236.87	-1027.49
606	212.826	-1030.27
457.659	167.49	-1027.49
405.804	147.616	-1027.49
343.861	151.689	-1024.71
388.116	173.951	-1027.49
392.724	26.0638	-1027.49
309.247	68.6842	-1027.49
342.51	18.3306	-1027.49
437.446	-116.966	-1027.49
481.576	-172.251	-1027.49
434.457	-261.18	-1027.49
569.828	-55.1922	-1027.49
558.64	35.0405	-947.497
599.257	38.1194	-947.497
765.746	-192.873	-947.499
569.62	-240.9	-947.496
538.093	-338.982	-947.495
501.236	-365.874	-944.715
456.759	-347.532	-947.494
395.436	-51.203	-944.715
323.23	-40.9733	-944.714
385.497	51.9196	-947.495
442.085	66.6038	-944.716
358.252	111.757	-947.495
292.191	126.518	-947.494
248.785	85.5303	-944.713
328.969	207.912	-944.715
488.742	212.855	-947.497
500.104	256.391	-950.277
539.121	221.511	-947.498
612.552	212.126	-950.278
504.734	140.317	-947.497
257.808	242.949	-947.494
208.18	308.52	-947.494
178.694	287.006	-947.494
70.9984	246.332	-944.712
167.223	184.485	-947.493
158.381	87.8418	-947.492
-17.9825	84.7963	-944.71
6.41452	-70.7389	-944.71
-160.167	-152.35	-944.707
-244.456	-202.695	-944.706
-347.748	-167.201	-944.705
-215.014	-238.67	-944.706
-187.035	-309.318	-944.706
-599.656	71.2854	-941.923
-354.226	-72.0428	-864.709
-387.659	167.034	-864.709
-166.547	468.778	-864.709
-107.93	99.3572	-867.489
-161.011	24.9097	-867.489
26.9954	54.9158	-864.709
20.9641	-29.0457	-867.489
160.351	172.403	-867.489
195.133	138.761	-867.489
260.33	103.102	-867.489
341.724	81.666	-867.489
285.26	-15.6627	-867.489
308.059	-16.5419	-867.489
238.684	-169.882	-867.489
461.463	-30.4095	-867.489
565.399	-108.519	-867.489
575.783	-330.41	-870.269
523.278	-369.172	-867.489
412.506	-333.022	-867.489
423.078	132.504	-867.489
428.397	188.386	-867.489
407.693	213.392	-867.489
421.205	306.184	-867.49
439.867	326.618	-870.269
574.652	222.407	-870.269
619.165	208.123	-867.49
654.091	236.614	-867.49
383.251	95.0539	-867.489
-226.633	-198.049	-1598.61
-5.33381	405.323	-1597.67
134.534	406.042	-1597.67
227.343	305.345	-1590.27
235.884	180.125	-1593.05
206.267	75.4361	-1593.05
167.957	118.342	-1598.61
179.513	98.4172	-1593.05
155.37	100.153	-1595.83
203.272	169.403	-1593.05
172.54	183.82	-1593.05
191.04	202.51	-1593.05
186.274	249.728	-1593.05
171.489	221.41	-1598.61
420.334	-22.9747	-1593.05
516.555	-166.409	-1598.61
284.472	162.732	-1593.05
-300.922	-10.1071	-1515.23
-208.541	-246.997	-1510.9
64.0962	199.02	-1514.19
100.02	131.087	-1513.58
157.62	191.812	-1511.62
373.978	107.815	-1512.3
404.619	32.1674	-1512.24
-264.018	192.534	-1432.35
-154.655	-127.635	-1432.91
-298.367	133.121	-1429.58
-345.323	-271.956	-1429.36
-201.174	-191.983	-1430.49
186.029	143.217	-1431.98
237.223	52.9238	-1431.84
242.248	69.4638	-1433.57
282.776	141.398	-1433.1
272.436	73.1744	-1431.02
316.946	123.522	-1429.67
342.383	102.259	-1429.02
368.895	137.458	-1431.59
402.756	11.2712	-1431.14
437.99	41.0042	-1430.82
535.977	-5.05175	-1432.46
523.578	-224.123	-1430.97
418.708	-190.116	-1427.7
147.174	325.608	-1354.06
202.313	250.352	-1355.63
286.659	142.086	-1356.19
319.647	337.473	-1354.52
327.872	144.689	-1354.95
164.412	279.728	-1353
226.837	301.526	-1352.87
272.89	275.363	-1349.78
284.022	249.233	-1350.47
355.185	59.6969	-1355
246.174	58.3493	-1352.39
260.312	62.911	-1352.22
277.406	-42.5701	-1352.06
316.695	138.46	-1354.23
324.231	92.7654	-1353.15
162.703	101.976	-1349.49
192.438	141.155	-1350.84
355.969	130.967	-1350.99
374.063	124.154	-1350.32
516.232	63.1482	-1358.61
484.027	87.5439	-1349.62
468.428	-146.312	-1349.24
-121.761	-151.252	-1278.61
-191.681	-209.479	-1278.61
-138.607	-200.458	-1272.3
247.052	227.723	-1278.61
249.987	276.497	-1278.61
275.711	223.418	-1278.61
287.006	215.782	-1278.61
325.097	341.192	-1276.41
257.903	102.802	-1278.61
278.301	18.4114	-1278.61
327.278	-38.2424	-1278.61
268.915	59.0926	-1274.41
-232.153	-206.258	-1190.29
264.421	213.575	-1198.61
286.492	186.476	-1198.61
322.911	180.66	-1198.61
347.135	184.17	-1198.61
362.675	211.472	-1198.61
182.763	166.365	-1193.93
156.136	10.4908	-1198.61
187.413	7.53422	-1198.61
218.058	58.503	-1198.61
246.23	137.056	-1198.61
289.286	143.319	-1198.61
329.52	129.083	-1198.61
391.378	35.1368	-1198.61
431.905	79.2901	-1198.61
238.485	116.079	-1195.49
350.855	48.7104	-1196.88
445.914	24.7257	-1196.08
302.414	8.75091	-1192.08
431.583	99.6549	-1194.39
471.279	-38.7802	-1198.61
479.01	35.3233	-1198.61
535.556	-171.055	-1192.2
544.005	-381.504	-1192.06
110.658	372.352	-1118.61
161.402	194.742	-1114.24
172.054	372.786	-1113.09
455.642	179.512	-1113.62
253.453	236.119	-1110.23
266.729	252.154	-1108.91
394.894	207.327	-1109.1
418.329	190.928	-1109.87
295.705	-65.9242	-1118.61
338.283	11.4373	-1114.61
387.121	129.837	-1114.51
287.691	98.88	-1114.06
317.59	-71.0129	-1114.37
356.507	87.6362	-1112.84
27.3363	67.242	-1101.93
226.797	140.181	-1107.29
318.591	140.753	-1107.96
388.49	-75.7032	-1108.07
439.03	155.992	-1106.97
269.652	141.759	-1104.44
458.937	144.575	-1103.83
213.659	86.4315	-1101.93
487.35	183.709	-1107.13
40.6176	213.974	-1036.6
18.4233	47.5324	-1036.86
87.2822	38.3025	-1031.82
48.8681	41.9856	-1029.8
326.147	315.36	-1032.38
328.277	-52.238	-1038.61
277.773	107.851	-1035.69
249.46	54.8296	-1033.07
249.723	35.6247	-1034.01
268.285	163.014	-1031.73
341.984	43.8205	-1030.31
445.949	144.136	-1030.54
454.879	-2.13613	-1031.27
508.072	73.3318	-1031.3
337.834	281.091	-1027.41
324.534	192.164	-1025.21
345.9	188.557	-1025.57
449.398	184.871	-1023.57
275.241	-9.81381	-1021.93
378.33	117.1	-1021.93
503.973	122.496	-1024.95
527.366	-293.156	-1021.93
-327.06	70.808	-953.953
112.238	389.76	-958.61
169.278	231.868	-958.61
196.159	209.13	-955.457
362.566	257.572	-952.462
249.285	242.203	-950.181
229.221	96.9061	-958.61
243.779	124.566	-958.61
263.04	28.777	-958.61
333.204	83.1584	-958.61
347.876	41.3024	-958.61
408.866	124.577	-955.59
226.766	69.918	-950.72
403.45	11.7576	-950.906
371.231	-230.278	-958.61
341.433	-325.574	-955.177
405.032	-114.389	-951.728
434.834	240.058	-948.942
435.93	102.851	-951.754
450.291	119.092	-952.968
436.26	177.911	-949.121
458.328	215.942	-950.433
541.343	-221.348	-958.61
492.889	-158.471	-956.601
344.543	166.808	-947.597
396.555	205.721	-947.739
527.885	-373.196	-944.337
-146.481	-192.059	-869.966
130.115	392.198	-878.61
136.721	340.648	-878.61
218.843	317.19	-878.61
304.634	293.773	-878.61
195.28	274.297	-872.67
387.705	312.638	-869.512
159.001	19.5878	-878.61
244.847	65.6966	-878.61
288.698	99.4327	-878.61
320.866	107.075	-878.61
349.715	-89.125	-878.61
355.674	30.9644	-878.61
207.796	143.341	-874.282
244.243	116.682	-873.563
223.256	78.8236	-871.14
311.151	155.475	-871.191
410.405	287.32	-870.456
449.161	98.1155	-878.61
479.649	104.352	-878.61
481.884	57.9285	-872.333
463.003	-207.612	-878.61
535.431	-144.793	-878.61
537.826	-129.478	-878.61
523.913	-472.802	-878.61
-148.783	-135.467	-1585.8
-353.739	-137.548	-1591.89
179.958	320.665	-1597.3
84.503	76.9042	-1590.72
237.146	170.268	-1591.18
318.424	13.7967	-1590.31
430.202	18.6345	-1592.95
418.664	-9.46635	-1513.05
487.139	-172.73	-1513.05
447.387	-169.668	-1515.83
-298.149	-189.125	-1433.05
391.879	148.563	-1430.27
221.588	237.01	-1435.83
539.854	106.902	-1435.83
12.7428	105.531	-1344.71
316.528	239.662	-1350.27
244.253	104.449	-1350.27
261.739	108.078	-1350.27
167.77	136.879	-1355.83
418.873	79.6693	-1347.49
208.765	99.1137	-1275.83
274.671	2.38885	-1275.83
343.334	-97.7841	-1273.05
-164.759	-219.815	-1273.05
-197.576	-170.239	-1273.05
-331.944	-280.454	-1195.83
318.419	68.7149	-1193.05
296.282	35.951	-1190.27
457.177	-64.436	-1193.05
332.161	7.73167	-1195.83
320.732	-69.1235	-1195.83
273.792	-10.9477	-1115.83
247.4	-61.3403	-1110.27
294.788	110.969	-1110.27
-258.907	-312.688	-1113.05
-188.049	-138.95	-1110.27
419.487	-14.0446	-1118.61
265.598	116.387	-1110.27
-306.48	-215.291	-1033.05
-100.656	-213.87	-1027.49
433.531	-139.664	-1033.05
415.437	-40.6472	-1035.83
349.363	91.8623	-1033.05
258.217	228.114	-1030.27
458.657	-161.526	-1033.05
296.809	165.967	-950.27
553.718	-253.298	-950.27
531.937	-278.359	-947.49
358.869	-67.8192	-950.27
393.4	48.9853	-953.05
285.498	76.6644	-953.05
271.753	64.8392	-955.83
229.711	69.4975	-955.83
237.655	216.842	-953.05
127.892	264.295	-873.05
218.022	230.234	-873.05
363.243	93.2143	-870.27
412.762	-90.3036	-873.05
621.852	322.961	-1598.38
391.841	-322.325	-1598.38
524.972	131.563	-1598.38
436.985	6.33101	-1598.38
436.575	-115.294	-1598.38
421.827	143.72	-1598.38
365.674	53.7056	-1598.38
343.122	83.9448	-1598.38
324.147	160.573	-1598.38
314.44	95.4518	-1598.38
590.311	312.625	-1598.38
555.898	260.022	-1598.38
549.84	340.589	-1598.38
486.812	227.021	-1598.38
438.338	187.499	-1598.38
369.335	217.431	-1598.38
356.325	302.493	-1598.38
349.985	286.742	-1598.38
330.173	433.876	-1598.38
316.173	449.073	-1598.38
301.748	60.3232	-1598.38
291.639	3.16788	-1598.38
284.369	120.067	-1598.38
228.573	114.097	-1598.38
200.339	137.762	-1598.38
199.393	68.9737	-1598.38
178.559	152.301	-1598.38
137.465	82.1836	-1598.38
59.0991	15.8761	-1598.38
296.881	276.74	-1598.38
241.837	243.971	-1598.38
173.834	271.839	-1598.38
159.236	184.571	-1598.38
147.148	303.564	-1598.38
146.511	199.215	-1598.38
267.791	493.118	-1598.38
214.655	496.368	-1598.38
-198.424	-221.004	-1598.38
-154.139	-171.838	-1598.38
-237.058	-134.003	-1598.38
-237.515	-174.703	-1598.38
671.442	54.4729	-1518.38
635.555	26.1666	-1518.38
476.547	-373.33	-1518.38
554.761	103.089	-1518.38
479.597	97.5833	-1518.38
465.933	-15.9796	-1518.38
465.215	-25.661	-1518.38
456.524	46.5321	-1518.38
438.203	-212.147	-1518.38
434.93	-95.0416	-1518.38
351.598	-45.0463	-1518.38
330.939	97.4094	-1518.38
589.873	252.893	-1518.38
528.943	236.758	-1518.38
459.762	180.906	-1518.38
454.614	204.616	-1518.38
408.381	197.109	-1518.38
407.619	164.165	-1518.38
400.597	177.276	-1518.38
378.07	232.194	-1518.38
365.513	159.637	-1518.38
355.334	291.196	-1518.38
335.323	263.282	-1518.38
316.54	224.997	-1518.38
300.971	-20.7302	-1518.38
250.062	76.4877	-1518.38
300.897	344.51	-1518.38
292.951	335.19	-1518.38
274.663	368.398	-1518.38
262.122	204.629	-1518.38
172.273	272.859	-1518.38
160.52	202.954	-1518.38
150.826	169.428	-1518.38
150.304	272.916	-1518.38
132.069	313.31	-1518.38
-155.646	-259.312	-1518.38
-83.6107	-175.915	-1518.38
-111.319	-163.279	-1518.38
-154.494	-184.877	-1518.38
454.754	-296.961	-1428.96
443.035	13.5762	-1434.41
363.688	130.677	-1435.31
345.008	134.101	-1435.68
344.971	109.768	-1434.97
443.728	104.593	-1433.31
347.009	-29.9961	-1433.08
457.635	156.622	-1428.36
402.701	-105.617	-1430.15
346.068	5.91346	-1429.38
329.466	118.538	-1429.96
353.864	212.24	-1438.38
407.499	221.206	-1436.33
373.301	319.546	-1436.67
542.614	330.37	-1431.93
417.81	231.187	-1431.7
389.458	208.279	-1432.84
477.295	254.918	-1429.93
469.042	218.997	-1429.29
429.51	258.333	-1429.85
311.771	108.929	-1433.99
309.952	133.529	-1434.37
293.06	147.792	-1434.08
274.433	189.993	-1435.72
264.99	133.592	-1436.72
257.619	162.585	-1435.48
239.089	159.574	-1434.49
236.412	130.314	-1433.74
233.355	147.288	-1434.46
190.901	65.3703	-1435.05
67.915	77.8286	-1434.76
273.499	26.0445	-1433.19
244.383	-7.71984	-1431.42
192.413	150.421	-1432.05
143.924	55.7187	-1432.66
308.461	182.756	-1429.96
297.671	393.007	-1438.38
297.967	320.354	-1438.38
296.256	380.468	-1438.38
219.506	367.132	-1438.38
158.155	312.133	-1438.38
265.116	266.28	-1434.26
229.462	376.399	-1435.62
307.824	281.47	-1430.74
286.431	263.116	-1432.2
-236.41	-214.971	-1435.73
-1.81009	-145.664	-1428.99
-57.415	-26.8008	-1434.43
-64.4664	-37.1904	-1433.83
-239.252	25.9217	-1432.15
-280.857	-83.4707	-1432.66
401.516	-318.955	-1358.38
570.284	112.488	-1358.38
549.639	-44.9225	-1358.38
540.929	-66.1107	-1358.38
512.372	108.122	-1358.38
502.084	-39.6436	-1358.38
495.898	117.576	-1358.38
461.399	-94.1969	-1358.38
396.501	130.464	-1358.38
396.933	79.8099	-1358.38
384.549	113.256	-1358.38
347.34	107.691	-1358.38
296.282	21.2619	-1358.38
478.878	-48.745	-1356.13
422.491	68.2285	-1354.95
343.061	66.3691	-1356.22
297.906	75.4399	-1355.19
429.21	73.9947	-1353.07
377.304	-159.303	-1351.07
361.069	-28.2027	-1352.27
342.764	1.83884	-1351.25
416.229	0.205435	-1348.6
526.183	204.659	-1358.38
465.137	233.33	-1358.38
417.4	145.583	-1358.38
406.776	281.426	-1358.38
360.982	250.346	-1358.38
333.941	186.682	-1358.38
330.45	249.322	-1358.38
309.973	217.293	-1358.38
294.392	181.067	-1358.38
433.603	256.224	-1352.96
350.088	151.172	-1353.11
306.963	259.042	-1352.6
303.637	379.849	-1352.44
279.578	19.2058	-1358.38
259.542	11.3166	-1358.38
247.654	120.518	-1358.38
237.945	68.3815	-1358.38
143.411	131.905	-1358.38
218.419	26.1764	-1352.06
279.71	106.891	-1348.58
267.231	27.3263	-1347.8
286.233	231.109	-1358.38
258.666	202.156	-1358.38
228.732	370.768	-1358.38
213.391	353.604	-1358.38
212.446	372.246	-1358.38
193.146	337.997	-1358.38
189.406	324.668	-1358.38
161.167	159.425	-1358.38
157.891	180.87	-1358.38
257.339	338.92	-1351.61
-166.689	-0.381217	-1353.38
-277.553	351.35	-1353.03
-296.111	-229.425	-1344.6
458.916	-210.816	-1275.87
455.79	-220.977	-1274.86
437.758	-165.374	-1270.63
427.324	-191.919	-1271.2
465.098	124.221	-1278.38
420.205	156.175	-1278.38
409.193	158.399	-1278.38
367.989	92.6361	-1272.87
512.064	66.2825	-1268.66
411.222	123.607	-1268.69
505.565	237.976	-1278.38
460.883	292.648	-1278.38
434.075	218.584	-1278.38
374.711	300.439	-1278.38
355.17	474.638	-1278.38
348.416	339.932	-1278.38
433.445	276.225	-1272.37
361.648	322.518	-1273.04
359.245	279.346	-1271.95
528.728	387.829	-1268.23
386.125	279.053	-1269
352.373	30.5708	-1278.38
334.44	123.253	-1278.38
321.483	123.651	-1278.38
281.399	110.863	-1278.38
276.568	55.4897	-1278.38
271.377	112.512	-1274.76
213.477	110.822	-1275.44
334.046	157.798	-1268.92
292.465	114.883	-1269.75
168.043	151.654	-1268.37
339.795	397.299	-1278.38
292.061	239.933	-1278.38
265.478	357.288	-1278.38
169.323	383.211	-1278.38
177.216	276.703	-1271.08
234.084	352.41	-1269.08
-121.473	-122.742	-1278.38
-147.638	-124.535	-1278.38
-258.344	113.189	-1274.37
-165.145	339.555	-1278.38
-307.894	-273.52	-1278.38
-326.864	-265.651	-1275.84
-380.201	301.56	-1278.38
-402.715	307.203	-1272.64
648.273	-79.948	-1265.1
500.607	-89.1686	-1266.77
131.912	121.789	-1262.18
638.506	134.498	-1189.1
613.353	300.261	-1190.44
371.943	-149.385	-1191.44
516.208	153.395	-1198.38
375.226	164.849	-1198.38
335.349	74.3601	-1198.38
433.533	37.9629	-1194.76
453.646	135.54	-1192.36
410.088	99.9544	-1192.82
536.163	255.161	-1198.38
478.77	408.213	-1198.38
485.806	257.13	-1198.38
472.539	302.483	-1198.38
458.525	481.239	-1198.38
432.921	488.154	-1198.38
400.715	254.891	-1198.38
390.557	225.234	-1198.38
353.867	282.074	-1198.38
332.034	282.038	-1198.38
315.203	305.633	-1198.38
308.404	228.242	-1194.34
319.936	207.945	-1190.3
280.088	486.622	-1192.25
283.103	66.3473	-1198.38
272.855	167.247	-1198.38
256.13	81.6921	-1198.38
49.8642	83.6267	-1195.76
1.32134	-61.8597	-1190.53
-239.217	-286.475	-1198.38
-255.848	-203.008	-1193.34
-34.2363	84.0754	-1198.38
-154.322	-171.505	-1198.38
-181.469	-172.074	-1198.38
-203.475	-165.66	-1198.38
-234.809	-59.7092	-1198.38
-344.085	-135.069	-1196.32
700.385	-127.716	-1111.18
391.798	-387.389	-1113.99
502.219	-189.262	-1113.42
529.594	-190.906	-1108.9
429.614	-14.4476	-1116.29
428.7	94.2414	-1115.53
401.335	-65.1248	-1115.89
394.585	91.4771	-1114.88
495.403	-43.096	-1110.98
326.137	38.6217	-1111.69
485.573	5.67781	-1109.55
374.061	-10.3023	-1109.89
433.153	336.256	-1118.38
361.774	192.909	-1118.38
622.921	169.902	-1116.34
503.829	274.794	-1116.56
437.617	223.801	-1116.03
425.125	187.482	-1114.36
406.059	412.538	-1115.35
351.487	172.191	-1116.28
530.426	429.76	-1113.46
426.934	247.19	-1111.47
383.369	306.769	-1111.85
532.727	196.089	-1109.69
453.767	291.317	-1109.91
277.969	48.0156	-1114.61
172.504	128.515	-1116.22
290.922	346.03	-1115.5
285.277	333.049	-1116.33
257.914	288.596	-1115.29
241.276	146.243	-1113.7
218.018	149.847	-1116.73
177.655	157.29	-1115.16
162.639	312.417	-1113.21
124.645	228.741	-1112.43
-323.824	-248.141	-1118.38
-186.555	-281.744	-1110.32
-61.4593	-167.3	-1113.37
-338.655	-238.597	-1115.19
647.975	-835.046	-1034.35
652.762	-183.973	-1038.38
531.047	-399.931	-1038.38
557.192	112.273	-1038.38
502.679	79.6246	-1038.38
490.412	-111.095	-1038.38
477	-78.3277	-1038.38
415.22	12.9423	-1038.38
410.437	50.0005	-1038.38
393.884	74.1438	-1038.38
365.129	81.8986	-1038.38
482.274	-58.689	-1036.52
360.097	17.2641	-1031.68
576.31	210.563	-1038.38
486.309	176.679	-1038.38
483.98	242.063	-1038.38
480.632	131.785	-1038.38
475.948	207.99	-1038.38
448.175	370.538	-1038.38
425.262	199.852	-1038.38
410.714	123.855	-1038.38
369.23	166.767	-1038.38
317.184	335.174	-1038.38
423.736	143.336	-1032.4
375.443	331.49	-1030.48
357.248	337.963	-1030.62
315.665	406.21	-1030.15
303.883	19.1568	-1038.38
295.333	-29.9236	-1038.38
275.585	-15.5358	-1038.38
233.512	69.6138	-1038.38
307.241	62.0988	-1034.96
277.728	74.6246	-1036.12
122.112	32.9164	-1030.64
181.809	122.249	-1038.38
214.867	310.36	-1032.27
-141.472	-234.744	-1038.38
-146.11	-204.644	-1038.38
-48.2894	-150.737	-1034.68
-211.13	-71.4935	-1033.11
-128.114	249.994	-1038.38
-159.181	245.409	-1038.38
-174.971	238.026	-1038.38
-185.118	245.946	-1038.38
536.438	-148.452	-958.38
475.209	-237.994	-958.38
377.84	0.25639	-958.38
369.709	58.1591	-958.38
254.243	9.75857	-958.38
491.539	-4.36924	-953.163
390.121	-38.8731	-953.362
467.999	159.3	-958.38
383.299	249.363	-958.38
381.311	122.222	-958.38
370.584	141.297	-958.38
293.837	232.987	-958.38
269.616	66.5667	-958.38
260.94	279.065	-958.38
476.032	215.872	-953.861
395.955	189.255	-953.635
347.825	173.234	-954.635
43.0304	-110.999	-958.38
39.9212	37.2657	-958.38
14.1073	-101.374	-954.329
226.294	199.086	-958.38
216.213	148.555	-958.38
195.391	258.482	-958.38
182.655	174.632	-958.38
132.785	262.436	-958.38
218.211	228.927	-954.792
131.071	280.126	-952.579
121.986	160.298	-953.062
-181.336	-271.279	-952.886
-92.1789	-134.952	-958.38
-92.6976	-146.905	-958.38
-187.66	-219.77	-955.285
-324.196	55.3234	-958.38
-543.381	308.752	-958.38
590.168	318.459	-878.38
390.952	-343.003	-878.38
535.763	51.8785	-878.38
496.293	-111.616	-878.38
487.492	-46.2883	-878.38
461.709	-76.7885	-878.38
412.868	113.36	-878.38
327.781	111.156	-878.38
320.784	96.4066	-878.38
312.99	78.8399	-878.38
286.034	64.9168	-878.38
294.171	24.9943	-874.983
518.297	164.511	-872.597
504.042	-2.59315	-872.702
492.626	-80.7464	-872.704
376.779	156.144	-872.584
390.482	-135.26	-872.983
369.48	29.149	-872.774
496.808	420.164	-878.38
474.394	309.599	-878.38
446.87	318.638	-878.38
438.887	223.025	-878.38
403.196	312.978	-878.38
400.608	211.858	-878.38
366.963	290.149	-878.38
343.127	232.773	-878.38
334.155	200.601	-878.38
431.353	354.977	-876.563
388.017	204.603	-873.869
472.51	267.626	-871.306
411.818	277.189	-871.56
414.6	169.089	-872.55
296.222	356.256	-872.73
243.214	44.5786	-878.38
223.763	116.593	-878.38
167.505	109.286	-878.38
164.725	65.5039	-878.38
142.062	91.368	-878.38
240.493	298.083	-878.38
206.173	345.507	-878.38
205.068	170.05	-878.38
248.061	268.406	-872.48
-204.097	-276.477	-875.323
-147.043	-131.398	-878.38
-180.193	-73.1381	-870.881
-50.8764	110.276	-878.38
-107.683	170.861	-878.38
-496.395	347.521	-878.38
