# Supplementary material for: Spinal premotor interneurons controlling antagonistic muscles are spatially intermingled
Source: eLife. 2022 Dec 13;11:e81976. doi: 10.7554/eLife.81976 (PMC9844990; doi:10.7554/eLife.81976)
Supplement: Figure 3—figure supplement 2—source data 10. [file elife-81976-fig3-figsupp2-data10.xlsx]

## Sheet: Sheet1
31.63	-10.45	-692
-85.48	-77.73	-696
-362.58	-197.19	-692
-145.43	-217.23	-702
-348.1	-230.01	-702
94.35	27.13	-698
-278.94	-82.63	-720
-227.57	-221.86	-726
434.31	250.07	-688
388.36	256.74	-688
377.25	145.15	-694
501.6	185.77	-692
535.47	153.38	-694
390.17	185.46	-696
445.4	254.81	-700
471.24	265.1	-700
488.44	224.01	-698
489.41	314.41	-704
466.47	46.02	-702
200.12	147.45	-704
307.96	132.33	-706
374.13	147.97	-710
230.72	235.71	-714
205.07	250.53	-708
325.12	230.52	-712
291.73	263.81	-714
505.91	34.5	-716
579.33	48.12	-716
616.71	27.97	-716
223.02	308.52	-720
109.66	110.52	-720
179.85	105.5	-720
245.69	55.39	-720
378.66	182.1	-724
391.67	190.44	-726
427.22	170.34	-726
451.82	150.07	-724
188.31	132.23	-726
172.01	119.86	-726
149.08	186.68	-722
445.41	184.94	-716
94.64	130.09	-696
196.62	29.72	-698
415.02	140.06	-702
366.13	68.26	-692
378.22	270.71	-694
392.22	-45.36	-700
328.34	-37.89	-704
284.23	2.21	-706
445.07	-71.13	-714
439.24	-57.14	-718
404.86	-35.5	-726
506.68	-138.25	-728
569.61	28.31	-734
605.27	-0.64	-738
542.94	-361.55	-728
455.81	-422.7	-716
570.69	-378.37	-710
487.85	-370.69	-706
396.59	-202.77	-706
722.1	-166.92	-708
551.45	-227.41	-714
544.37	-267.49	-712
-234.61	0.39	-448
-401.09	-190.99	-456
-311.27	-286.41	-456
-166.56	-182.21	-478
199.37	55.24	-478
618.95	-5.22	-446
634.63	150.41	-446
260.92	359.84	-450
618.89	218.87	-452
614.09	172.74	-448
379.37	47.89	-450
473.71	160.24	-452
384.01	223.07	-454
353.74	301.63	-454
450.39	4.48	-462
439.7	28.86	-462
343.84	130.31	-460
429.86	111.45	-458
410.56	197.52	-462
369.93	192.2	-464
281.71	218.85	-466
215.71	86.37	-466
190.4	138.19	-470
197.71	180.67	-470
355.83	39.23	-478
325.14	8.89	-478
216.4	123.78	-480
273.54	70.99	-478
380.2	162.3	-474
345.75	165.55	-480
446.04	20.76	-480
449.72	70.44	-478
514.45	110.74	-474
514.15	359.83	-470
523.49	270.33	-470
499.57	134.74	-470
518.64	129.86	-470
327.94	252.89	-474
524.7	33.67	-474
335.46	54.61	-472
572.63	212.58	-472
247.28	231.81	-478
202.58	293.39	-480
355.51	-68.29	-474
280.33	162.76	-450
306.09	154.61	-446
201.44	156.11	-448
244.92	77.96	-448
182.86	176.91	-452
236.29	270.78	-450
315.56	310.7	-464
248.73	354.5	-462
436.75	316.99	-460
581.49	-23.96	-460
627.64	37.15	-466
769.58	-13.6	-464
198.2	84.19	-456
807.89	-101.89	-472
436.26	-437.88	-472
408.92	-377.87	-474
403.17	-425.39	-476
289.51	-153.28	-478
465.46	-81.01	-470
564.35	-228.82	-466
475.05	-403.4	-452
473.51	-446.77	-448
486.78	-448.31	-460
567.17	-394.05	-458
727.33	-452.17	-460
181.02	109.29	-208
-448.9	112.56	-208
-321.3	-183.02	-214
198.88	115.92	-216
102.91	18.35	-222
155.3	29.3	-232
87.8	34.97	-232
-207.95	-167.7	-232
-337.38	-72.03	-234
-483.2	-24.53	-240
-326.18	133.27	-240
-263.97	-179.01	-244
-203.55	-119.34	-238
-182.58	-201.82	-234
-167.24	-178.81	-236
-194.97	-216.62	-232
-197.19	-259.12	-238
66.38	38.19	-242
-264.6	-188.58	-218
177.53	-25.03	-224
452.03	151.92	-204
475.24	125.41	-206
483.35	202.06	-208
292.12	245.37	-212
161.76	236.59	-216
246.48	258.98	-212
527.75	249.82	-210
548.83	282.47	-210
588.58	299.89	-208
376.5	125.51	-210
337.64	144.36	-212
526.17	300.24	-214
440.18	304.42	-220
418.78	146.93	-218
614.89	314.42	-220
518.58	202.75	-222
412.23	196.55	-230
476.78	228.6	-238
374.24	182.8	-236
407.14	125.38	-230
236.37	180.57	-228
122.1	140.47	-226
273.61	234.48	-230
229.78	92.48	-220
271.88	408.27	-232
66.69	269.37	-242
78.68	239.07	-236
456.67	102.04	-236
376.92	206.08	-240
49.84	65.3	-210
297.93	59.09	-218
653.19	176.01	-240
626.24	-150.59	-208
653.19	-83.18	-210
430.96	-121.4	-214
529.97	10.09	-212
387.86	27.11	-218
410.02	22.19	-216
604.43	26.96	-214
748.38	6.36	-220
392.84	-70.09	-224
583.33	16.59	-244
340.42	-98.8	-246
351.97	-190.9	-240
463.45	-210.74	-238
287.32	81.52	-238
279.86	10.74	-236
344.56	0.23	-230
550.2	49.23	-224
518.85	-189.15	-218
640.58	24.22	-238
290.18	-240.07	-244
569.38	-300.13	-242
558.07	-274.7	-240
572.29	-262.65	-242
454.72	-318.52	-236
394.59	-311.07	-236
599.55	-426.4	-230
426.52	-378.13	-224
554.37	-350.23	-216
452.9	-247.82	-218
-180.74	-107.33	-2
-451.31	161.77	-4
391.24	51.3	-2
332.51	87.67	-4
418.26	211.04	-2
376.34	281.18	-6
249.39	356.01	-4
260.89	376.31	-2
395.96	-46.85	-2
-170.22	-202.23	-714
-260.05	-238.48	-710
-327.37	-217.86	-700
-93.37	-156.36	-702
-234.34	-217.05	-694
-303.58	-312.52	-716
-185.69	-271.39	-716
-335.1	-278.64	-714
156.96	251.23	-690
170.46	274.17	-694
173.89	198.34	-696
138.71	189.9	-696
545.9	304.87	-698
471.43	205.33	-700
227.12	156.67	-688
501.34	308.26	-690
383.63	98.53	-690
405.31	167.73	-692
556.26	118.12	-692
472.01	143.61	-698
521.62	120.46	-700
566.97	160.55	-702
452.05	261.17	-706
522.13	221.65	-708
571.6	134.49	-708
439.79	245.49	-710
183.73	282.32	-698
546.12	265.95	-702
151.17	142.94	-706
128.18	193.14	-714
270.25	274.46	-716
182.02	131.37	-716
189.06	96.99	-716
493.18	183.68	-714
451.38	180.11	-714
648.06	267.29	-714
416.6	238.39	-720
436.74	274.35	-722
495.4	178.03	-722
432.44	128.13	-720
524.25	-151.26	-692
548.56	-42.08	-690
278.48	-136.73	-696
306.49	-160.85	-700
537.77	-42.47	-698
353.46	-82.03	-708
476.42	32.43	-708
534.13	-4.87	-712
328.84	-19.78	-714
410.25	-134.8	-710
516.45	-52.39	-716
430.63	38.17	-722
301.61	-28.47	-722
383.81	-341.02	-698
444.71	-324.98	-710
512.67	-372.8	-716
466.69	-352.47	-716
596.1	-78.34	-720
609.83	-87.67	-714
641.37	-99.49	-714
-360.73	37.84	-694
561.89	2.07	-718
588.56	11.97	-714
648.13	25.9	-718
-243.17	528.82	-478
-140.86	-186.53	-450
-141.09	-80.3	-450
-65.04	-153.8	-452
136.11	38.35	-452
-532.44	-4.41	-448
7.1	-82.28	-468
-236.45	-208.39	-470
-215.55	-223.22	-482
597.6	199.36	-450
207.7	264.47	-452
165.38	176.76	-452
300.92	248.75	-454
489.29	218.57	-456
180.59	299.55	-452
449.71	248.14	-454
397.77	217.36	-456
304.59	322.66	-458
201.17	284.79	-456
503.05	246.21	-460
220.03	274.31	-468
429.96	313.84	-468
450.48	261.98	-468
539.56	356.24	-472
569.31	208.37	-476
631.34	271.03	-472
395.24	183.74	-472
125.74	286.44	-472
146.63	261.43	-472
214.21	297.02	-478
278.24	280.82	-476
382.43	215.71	-480
449	219.71	-484
431.39	227.86	-480
383.6	293.89	-482
241.85	504.25	-474
418.17	364	-476
463.73	215.42	-484
213.12	190.05	-482
361.11	332.66	-482
466.47	307.06	-460
331.25	185.74	-478
737.15	259.98	-454
548.76	51.01	-448
231.93	130.04	-450
417.28	112.75	-452
410.19	86.62	-452
350.42	-23.39	-454
401.45	-71.05	-458
285.83	124.16	-454
263.59	-21.9	-462
249.03	135.82	-468
378.35	120.59	-464
325.04	131.74	-468
448.51	86.28	-466
548.36	64.15	-468
209.28	145.88	-484
263.58	77.28	-482
278.82	119.82	-480
501.29	154.38	-480
529.98	112.8	-478
438.97	78.85	-476
469.92	61.76	-478
407.56	36.95	-476
327.25	58.93	-476
628.22	118.79	-476
539.25	-105.56	-480
522.8	52.47	-484
517.17	-22.08	-484
685.74	-6.06	-476
579.73	-90.43	-472
420.77	59.89	-472
584.23	95.29	-468
553.16	-44.28	-464
494.58	-44.93	-462
488.03	133.31	-464
260.67	136.17	-458
406.43	160.89	-454
239.43	167.46	-478
508.6	-36.61	-466
608.68	-311.51	-454
569.09	-373.17	-456
505.1	-299.54	-460
596.79	-389.17	-466
427.84	-329.53	-468
486.18	-174.43	-476
465.67	-252.8	-478
-229.23	-194.95	-234
371.85	-256.7	-208
437.3	-249.03	-206
462.78	-102.31	-210
413.4	-162.01	-210
392.5	-293.04	-210
438.51	-322.79	-212
545.93	-322.72	-210
398.01	-222.85	-214
533.87	-240.25	-228
354.54	-196.64	-230
399.64	-97.16	-230
421.86	-258.25	-238
610.8	-304.47	-234
720.03	-144.74	-216
352.84	20.85	-214
313.64	-6.36	-212
392.46	86.67	-216
455.76	67.9	-218
299.51	-64.86	-220
330.31	74.94	-224
543.97	70.72	-228
354.73	86.66	-230
516.25	55.51	-230
415.18	-12.83	-244
386.39	100.09	-244
343.78	90.44	-244
279.41	74.99	-256
495.81	-74.69	-232
528.55	17.71	-212
102.77	23.24	-260
103.47	61.91	-254
141.21	24.27	-248
141.61	99.15	-240
246.63	68.29	-234
469.02	107.72	-212
445.96	297.19	-230
472.1	317.88	-228
184.2	142.76	-236
271.67	254.21	-238
412.14	119.41	-236
460.9	172.18	-240
528.94	179.3	-242
458.56	220.67	-244
423.21	181.17	-246
415.59	156.16	-252
327.24	242.2	-254
205.36	143.62	-264
225.59	156.2	-262
267.28	284.16	-256
105.29	168.89	-252
212.7	238.26	-248
512.95	291.95	-248
538.47	318.82	-250
545.52	298.61	-252
406.99	311.07	-246
230.6	300.95	-254
354.67	260.59	-256
393.35	194.67	-260
313.46	160.61	-264
422.74	154.82	-264
472.75	196.52	-264
584.15	222.6	-258
514.49	94.79	-266
414.7	110.61	-264
453.67	98.04	-234
244.89	324.11	-250
-123.92	-32.84	-256
-410.69	181.2	-234
-283.51	-117.1	-260
324.55	497.27	-240
443.1	-396.64	-208
-304.9	-145.79	-240
189.13	233.29	-232
-304.45	-303.73	-2
284.51	276.15	-2
291.78	290.37	-2
376.65	34.33	-2
427.28	41.74	-2
-266.232	109.739	-1.39
-595.987	-126.441	-1.39
-248.509	-207.015	-1.39
-257.678	-314.08	-1.39
-110.063	-256.428	-1.39
-75.8495	-194.578	-4.17
4.81208	-230.69	-1.39
10.1629	-63.9104	-1.39
210.1	51.6798	-1.39
228.465	17.0482	-1.39
118.284	-18.235	-4.17
391.305	-16.5173	-1.39
439.94	57.6509	-1.39
490.631	84.2636	-1.39
467.596	136.15	-1.39
404.902	161.273	-1.39
404.73	202.735	-1.39
372.659	204.183	-1.39
355.894	218.569	-1.39
316.761	218.091	-1.39
283.748	222.585	-1.39
571.347	107.434	-1.39
357.942	127.151	-4.17
205.502	122.528	-1.39
782.218	-332.286	-1.39
594.772	-375.239	-1.39
689.718	-36.1292	-4.17
749.593	-8.25063	-1.39
723.419	87.1609	-1.39
649.64	-40.2598	-1.39
868.582	122.599	-1.39
676.842	165.659	-1.39
650.393	197.368	-1.39
665.821	216.371	-1.39
631.937	277.505	-1.39
258.166	-16.4866	-84.17
376.423	49.79	-84.17
311.3	96.9488	-84.17
285.247	111.379	-86.95
316.589	128.612	-81.39
355.827	143.54	-84.17
398.736	161.631	-81.39
433.897	163.121	-81.39
503.951	90.0176	-81.39
583.471	178.397	-86.95
540.421	225.278	-81.39
511.024	284.957	-86.95
359.042	298.957	-81.39
206.715	303.09	-81.39
132.334	98.629	-81.39
206.522	99.2449	-86.95
222.43	56.4395	-84.17
-42.6405	-103.558	-84.17
-105.061	-239.52	-84.17
-195.168	-156.279	-84.17
-269.872	-258.815	-81.39
-387.989	-241.4	-84.17
-423.769	-181.016	-84.17
-462.628	192.924	-84.17
-242.127	250.229	-81.39
-564.619	229.405	-84.17
562.034	-10.5337	-84.17
603.162	-22.5338	-81.39
647.509	61.0108	-86.95
436.476	-248.174	-84.17
271.751	-243.223	-81.39
663.121	114.156	-161.39
626.799	140.631	-161.39
645.171	215.409	-161.39
698.378	263.004	-161.39
535.925	126.166	-161.39
526.864	114.555	-161.39
829.689	-303.717	-161.39
391.597	-25.7497	-161.39
308.224	5.30863	-161.39
318.472	40.4675	-161.39
247.974	167.033	-161.39
214.358	180.934	-161.39
402.871	255.402	-161.39
214.355	-88.648	-161.39
139.908	23.9981	-161.39
271.162	70.099	-161.39
403.727	-123.208	-161.39
-196.652	-88.8834	-161.39
-432.407	62.2049	-161.39
-174.109	-257.988	-161.39
-175.757	-190.193	-161.39
-182.204	-296.134	-161.39
758.391	50.4615	-161.39
444.219	-255.237	-246.95
318.013	-6.59244	-244.17
287.138	78.9262	-244.17
335.27	74.3075	-241.39
225.31	30.9952	-244.17
259.653	112.55	-241.39
524.108	87.3633	-244.17
564.196	81.9623	-244.17
678.156	3.52228	-241.39
578.548	-17.4938	-241.39
522.019	-38.7303	-241.39
264.439	-229.741	-244.17
-36.4124	-205.11	-241.39
-211.759	-254.768	-244.17
-253.127	-160.208	-241.39
-147.51	-155.633	-244.17
165.01	29.1581	-241.39
-285.223	159.051	-244.17
-387.223	326.664	-241.39
-478.99	-14.3909	-244.17
-388.337	-4.46296	-244.17
844.474	-209.617	-241.39
365.424	199.53	-321.39
476.436	261.533	-321.39
581.685	241.853	-321.39
607.702	207.543	-321.39
621.212	158.286	-321.39
663.582	102.664	-324.17
569.326	77.6566	-321.39
541.925	129.093	-324.17
520.721	159.6	-321.39
410.186	145.12	-321.39
475.464	164.819	-321.39
311.899	119.743	-321.39
298.061	45.2131	-324.17
370.77	66.5438	-324.17
384.531	-30.6856	-321.39
435.545	-36.7662	-321.39
562.22	-55.7151	-321.39
252.267	243.039	-324.17
103.293	10.2916	-324.17
-9.5607	102.103	-321.39
12.8465	-45.5841	-321.39
-275.25	-122.527	-326.95
-161.93	-140.634	-321.39
-116.967	-175.034	-321.39
-174.082	-202.276	-321.39
-487.14	288.653	-321.39
530.944	-299.031	-321.39
627.801	-251.968	-321.39
712.378	-412.563	-401.39
433.418	-253.613	-401.39
257.4	-75.6702	-401.39
198.105	-27.6001	-401.39
223.222	73.8339	-401.39
279.247	125.966	-401.39
281.267	214.7	-401.39
406.216	172.75	-401.39
474.413	136.32	-401.39
525.791	112.105	-401.39
556.125	175.458	-401.39
682.012	152.148	-401.39
684.425	62.5806	-401.39
660.269	-12.2288	-401.39
-43.9587	-194.993	-404.17
-143.591	-101.831	-401.39
-221.022	-196.803	-401.39
-260.61	-276.576	-404.17
187.815	100.017	-401.39
657.2	-112.641	-409.73
768.008	201.567	-481.39
755.664	182.981	-481.39
626.987	134.984	-481.39
604.816	58.3167	-481.39
615.565	221.195	-481.39
475.633	196.957	-481.39
380.585	143.722	-481.39
355.323	204.179	-481.39
252.864	122.995	-481.39
190.345	183.688	-481.39
71.5719	121.271	-481.39
340.13	24.8186	-481.39
418.25	27.1954	-481.39
296.392	-141.44	-481.39
420.229	-236.259	-481.39
98.2499	-22.4626	-481.39
-12.5729	-77.0337	-481.39
-49.5173	-122.741	-481.39
-146.08	-185.298	-481.39
-182.46	-248.237	-481.39
-439.456	184.803	-481.39
591.235	305.925	-566.951
614.056	205.075	-566.95
657.405	169.323	-566.95
678.121	30.0706	-564.17
761.976	45.0658	-564.17
599.261	-11.1691	-569.73
506.233	1.95175	-569.73
515.688	19.2126	-566.95
499.825	37.0009	-569.73
499.982	-22.4013	-566.95
403.154	-5.69232	-569.73
353.411	-99.9456	-566.95
221.998	126.961	-566.95
244.741	187.674	-569.73
194.198	225.263	-564.17
321.482	149.541	-569.73
143.955	14.0823	-569.73
-246.092	243.289	-569.73
-321.137	-15.4904	-569.73
-256.632	-97.9231	-569.73
-256.27	-77.8469	-569.73
-82.4658	-100.363	-569.73
28.5462	-121.662	-572.51
-123.114	-207.864	-569.73
-126.019	-222.653	-569.73
-185.467	-231.104	-572.51
-267.846	-202.514	-566.95
-397.878	-113.619	-564.17
413.724	239.47	-569.73
-510.784	283.18	-652.51
-357.5	-109.986	-649.73
-254.324	-174.44	-655.29
-271.528	-266.425	-649.73
-493.283	-234.685	-641.39
-241.999	-103.187	-655.29
-90.2838	-153.835	-644.17
133.912	-80.5106	-649.73
79.6362	-57.9912	-646.95
226.932	-48.888	-646.95
359.336	-46.1277	-652.51
442.765	-40.3635	-652.51
407.048	-134.775	-649.73
445.582	-170.133	-652.51
360.562	-300.462	-644.17
585.732	-46.8228	-641.39
535.142	9.41371	-644.17
608.036	61.9927	-649.73
550.505	192.236	-649.73
520.751	187.297	-646.95
540.565	219.561	-646.95
616.976	195.553	-649.73
632.792	247.321	-652.51
833.585	145.647	-641.39
754.268	99.649	-649.73
395.829	235.095	-649.73
274.241	154.402	-646.95
286.447	86.8363	-649.73
330.675	78.6683	-649.73
382.661	93.7948	-652.51
418.85	214.144	-652.51
-553.291	131.476	-721.39
-461.908	15.9546	-726.95
-235.708	78.4645	-721.39
-229.144	-107.772	-721.39
-117.084	-171.924	-724.17
-213.471	-270.05	-724.17
-297.461	-293.053	-729.73
-432.566	-107.851	-724.17
-262.97	-185.094	-721.39
49.6568	58.54	-726.95
139.334	90.1246	-729.73
145.561	96.2795	-726.95
248.02	72.5878	-726.95
300.71	82.6714	-721.39
386.052	92.9939	-726.95
419.831	164.276	-726.95
392.507	236.18	-721.39
487.623	210.217	-726.95
522.051	219.242	-724.17
574.696	276.185	-726.95
623.04	155.149	-726.95
530.086	126.304	-729.73
555.841	39.9062	-724.17
593.242	-82.9357	-721.39
576.249	-215.589	-738.07
642.39	-159.278	-732.51
887.717	-239.643	-724.17
-236.319	-239.172	-787.49
-200.477	-218.734	-787.49
-303.45	-202.053	-787.49
-172.038	-185.875	-784.71
-232.939	-282.353	-787.49
-7.46344	-96.3456	-787.49
36.1492	-44.994	-787.49
104.715	14.2837	-787.49
-201.099	324.893	-787.49
314.052	124.155	-787.49
196.994	82.8507	-787.49
377.458	-5.67103	-790.27
395.096	44.3214	-790.27
369.024	71.6459	-790.27
563.168	34.9419	-790.271
556.659	-89.8897	-790.271
669.206	-1.43948	-790.271
603.238	125.571	-790.271
604.651	159.397	-790.271
568.839	143.199	-787.491
522.957	158.108	-790.271
582.306	213.918	-790.271
529.909	235.017	-787.491
534.294	-408.194	-790.271
619.139	-176.322	-790.271
736.37	-344.572	-787.491
274.645	-74.704	-787.49
222.272	98.5827	-787.49
322.364	151.21	-710.27
360.618	149.105	-707.49
355.27	135.285	-707.49
413.077	111.266	-707.49
443.531	123.68	-710.27
492.22	107.497	-707.49
468.296	186.242	-707.49
452.289	196.799	-704.71
303.363	96.9808	-710.27
267.323	65.4099	-710.27
289.736	47.4004	-710.27
211.268	60.7149	-707.49
93.9841	117.777	-707.49
24.623	62.0696	-710.27
359.038	14.7153	-707.49
397.011	33.4306	-704.71
369.908	50.3943	-710.27
390.016	65.012	-707.49
397.183	87.0188	-710.27
383.458	100.802	-710.27
380.467	-9.53251	-710.27
511.112	-211.009	-707.49
436.335	-245.207	-707.49
163.368	-92.8223	-707.49
-194.987	-153.504	-710.27
-178.452	-72.8123	-710.27
-138.358	-201.497	-707.49
-48.54	-187.322	-704.71
-236.76	-266.99	-707.49
-295.294	-260.86	-710.27
-353.813	136.858	-627.49
-228.758	-18.6607	-630.27
-7.51706	-51.592	-630.27
10.4738	-69.8065	-627.49
88.1177	11.7688	-630.27
60.5736	48.5129	-630.27
95.8871	74.4347	-627.49
90.1172	210.707	-633.05
313.86	85.8906	-630.27
331.738	49.2536	-630.27
300.284	25.5707	-627.49
348.686	3.65911	-630.27
309.589	-40.5424	-627.49
271.89	310.858	-633.05
455.835	144.878	-630.27
474.879	125.369	-630.27
519.485	145.228	-627.49
361.066	139.401	-630.27
642.981	14.8139	-630.27
449.769	51.0671	-630.27
453.992	-5.00021	-630.27
434.751	-6.26265	-630.27
512.023	-45.7942	-627.49
431.648	-131.256	-624.71
402.085	-130.111	-627.49
525.241	-322.32	-624.71
574.337	-343.445	-627.49
587.815	-309.198	-627.49
304.405	179.524	-550.27
358.07	159.727	-553.05
353.393	120.429	-550.27
322.653	95.6588	-550.27
325.627	70.3846	-553.05
288.207	69.747	-553.05
269.415	118.61	-553.05
364.106	210.958	-550.27
448.08	164.568	-550.27
408.26	154.876	-550.27
396.318	78.2255	-550.27
401.886	-3.23721	-550.27
426.163	-83.4759	-550.27
447.674	-262.754	-547.49
131.317	47.2756	-553.05
86.0249	112.943	-550.27
231.372	231.89	-547.49
499.352	183.322	-550.27
591.184	180.924	-547.49
528.496	131.382	-547.49
-53.3193	65.1425	-550.27
-4.7641	-44.7124	-547.49
-96.4276	-143.092	-550.27
-245.457	-122.779	-547.49
-316.651	-139.137	-547.49
-306.333	-224.751	-550.27
-355.169	-44.1947	-464.71
-535.584	149.803	-461.93
-533.543	378.042	-464.71
-298.702	-65.4377	-467.49
-64.9943	26.0774	-464.71
-123.605	42.9275	-464.71
-267.759	-152.839	-464.71
303.72	1.17915	-467.49
448.696	-46.239	-467.49
514.256	-158.222	-467.49
642.553	-275.158	-470.27
488.608	-241.284	-467.49
428.773	-193.531	-467.49
569.003	-7.54016	-467.49
629.993	178.636	-470.27
510.556	196.061	-470.27
452.582	191.589	-464.71
424.577	180.588	-467.49
368.698	157.913	-464.71
381.689	173.913	-467.49
401.367	201.148	-464.71
477.289	240.982	-467.49
362.979	195.482	-470.27
305.609	163.041	-467.49
229.965	240.825	-467.49
203.293	113.026	-467.49
167.528	75.9676	-470.27
135.05	122.518	-467.49
198.89	61.2728	-464.71
257.631	34.6631	-464.71
-334.028	-146.408	-387.49
-272.137	-96.7134	-384.71
-252.525	-50.2001	-381.93
-159.49	-182.908	-381.93
-120.347	85.7805	-384.71
-101.228	13.1382	-387.49
166.533	183.876	-387.49
134.232	28.4539	-387.49
328.958	14.2381	-387.49
421.513	27.9696	-387.49
595.665	61.9574	-387.49
590.741	7.01196	-387.49
458.899	189.28	-387.49
518.975	125.47	-384.71
560.923	205.997	-387.49
469.867	203.524	-384.71
408.568	219.267	-384.71
414.158	293.254	-384.71
345.9	184.213	-387.49
376.691	156.839	-384.71
374.499	134.593	-387.49
350.495	116.877	-387.49
334.587	100.208	-384.71
318.635	49.3229	-387.49
281.342	82.0502	-387.49
266.966	66.3898	-381.93
237.607	78.1285	-387.49
228.193	58.3025	-387.49
223.974	34.3813	-384.71
245.773	33.5121	-387.49
642.976	63.4367	-390.27
-353.145	124.398	-387.49
-207.229	-277.595	-304.71
-226.767	-185.881	-304.71
-101.714	-170.486	-307.49
-377.108	-182.644	-304.71
-76.5222	27.49	-304.71
244.581	170.871	-307.49
159.22	205.339	-307.49
252.76	277.158	-307.49
317.293	263.29	-304.71
353.927	255.245	-307.49
448.988	264.286	-307.49
574.705	268.875	-307.49
552.292	235.208	-307.49
576.992	229.747	-307.49
561.872	201.785	-307.49
712.818	144.083	-307.49
641.535	64.5078	-307.49
469.286	122.836	-307.49
452.978	58.2159	-307.49
531.883	-29.326	-307.49
414.938	-128.864	-307.49
573.792	-125.249	-307.49
447.571	-218.596	-307.49
771.057	-69.5006	-307.49
373.73	135.115	-307.49
592.645	-463.005	-310.27
480.099	-463.247	-310.27
430.615	332.498	-224.71
392.519	288.026	-227.49
436.647	233.433	-230.27
383.981	164.799	-230.27
464.768	185.173	-230.27
588.108	208.046	-230.27
207.946	280.137	-227.49
134.234	249.743	-230.27
136.874	-45.9598	-230.27
527.16	-298.502	-230.27
487.58	-308.317	-230.27
-285.587	-75.0705	-230.27
-252.705	-214.511	-224.71
-241.79	73.3446	-227.49
-141.363	100.876	-230.27
-313.45	315.412	-227.49
353.195	129.038	-230.27
-226.458	-171.903	-147.49
-167.601	-149.843	-150.27
-102.333	-151.692	-144.71
-22.4532	-83.6962	-147.49
-116.761	-52.3457	-144.71
-334.281	-12.5848	-150.27
-299.542	140.773	-147.49
339.404	-289.095	-147.49
575.246	-272.759	-147.797
284.782	-281.468	-147.49
316.039	-124.043	-144.71
237.21	-126.239	-147.49
204.295	-119.17	-144.71
291.733	57.1283	-147.49
350.785	37.8257	-147.49
427.577	81.4487	-144.71
423.39	162.205	-144.71
464.578	222.376	-147.49
449.662	220.406	-144.71
400.94	267.882	-147.49
497.902	351.276	-143.577
158.474	228.418	-144.71
108.545	135.654	-144.71
374.295	268.16	-144.71
121.214	103.521	-147.49
209.722	155.279	-144.71
388.59	166.715	-147.49
340.444	158.911	-147.49
210.939	24.0812	-144.71
505.774	386.678	-67.49
460.2	239.69	-64.71
446.964	203.474	-64.71
386.201	221.457	-64.71
363.442	213.883	-64.71
357.722	193.356	-67.49
369.807	180.714	-67.49
435.834	107.909	-67.49
550.689	153.998	-64.71
356.371	105.106	-67.49
327.723	156.742	-67.49
267.836	211.916	-67.49
265.687	145.78	-64.71
254.531	105.145	-64.71
205.505	101.527	-67.49
190.572	55.1303	-67.49
150.339	47.9018	-67.49
94.34	82.5707	-67.49
106.5	42.2038	-67.49
274.468	-1.24855	-67.49
140.636	-54.7751	-67.49
103.895	-99.2806	-67.49
46.4517	-58.2285	-70.27
495.256	-281.915	-64.71
644.705	-239.853	-67.49
150.344	109.915	-67.49
-298.904	-185.63	-70.27
-287.34	-257.145	-67.49
-253.235	-225.931	-70.27
-138.759	-103.23	-67.49
-299.935	-121.762	-795.375
-214.576	-180.184	-798.61
329.37	229.539	-795.861
175.314	258.31	-794.199
234.293	347.118	-792.68
208.701	309.576	-790.684
287.133	223.543	-790.574
212.628	87.9292	-798.61
230.085	3.57354	-798.61
269.896	100.98	-798.61
291.593	190.309	-798.61
285.307	76.5517	-794.159
292.225	158.366	-794.188
349.006	0.375851	-793.524
399.562	87.7031	-791.675
322.557	86.5206	-791.086
427.963	-62.4814	-793.984
599.892	156.64	-790.275
569.149	-152.099	-790.331
82.7561	117.21	-786.961
111.869	327.291	-786.52
195.036	215.069	-787.177
205.54	159.563	-788.777
409.069	157.464	-783.884
445.987	-57.9305	-788.55
522.276	111.075	-787.731
63.5373	20.4295	-709.743
-229.775	-132.217	-718.61
-106.384	-156.924	-718.61
233.549	220.919	-718.61
404.626	264.335	-718.61
86.9351	212.525	-712.755
106.448	214.507	-712.748
354.234	241.136	-712.56
114.889	95.4306	-718.61
303.554	22.9648	-718.61
86.3602	40.6495	-715.593
111.111	31.9351	-715.281
143.273	181.421	-713.213
258.522	97.9115	-712.931
265.257	75.8296	-711.031
341.965	-30.9489	-711.3
345.777	-367.459	-713.586
455.297	181.721	-713.213
422.342	-69.6718	-715.334
419.557	10.646	-712.893
585.158	112.967	-712.405
383.206	-330.016	-712.033
460.474	-410.141	-710.727
474.268	-417.235	-710.901
120.679	475.649	-708.105
331.578	176.101	-707.979
517.421	178.969	-708.319
681.334	-412.075	-701.93
268.531	179.467	-638.61
259.13	54.518	-635.283
167.752	259.37	-634.072
283.47	120.553	-629.498
367.306	214.743	-633.539
366.861	107.291	-631.294
414.448	162.857	-631.575
447.679	66.2695	-630.152
405.779	-99.8909	-637.165
505.197	-113.807	-635.314
680.837	-110.128	-636.966
428.771	-140.648	-630.403
588.855	-424.278	-631.367
489.339	81.4317	-623.688
446.654	-32.0902	-621.93
526.067	-109.164	-627.367
-229.249	-168.557	-550.606
89.2512	276.202	-558.61
124.533	275.944	-558.61
165.55	206.045	-558.61
210.857	126.415	-558.61
280.207	104.853	-558.61
281.934	190.136	-558.61
261.771	81.709	-556.918
330.433	-39.4306	-558.61
413.173	128.943	-558.61
472.414	140.058	-558.61
545.655	56.9735	-558.61
570.368	23.3583	-558.61
346.24	76.034	-555.945
452.022	-27.1912	-550.906
522.958	-318.011	-557.028
403.902	-133.348	-552.011
468.491	-136.219	-553.176
683.022	-63.1105	-554.847
-230.672	-317.511	-475.379
-212.408	-319.211	-473.333
132.769	225.863	-478.61
79.0578	47.4129	-478.61
158.583	109.291	-478.61
164.717	150.25	-478.61
177.685	305.059	-478.61
186.171	161.985	-478.61
210.533	144.619	-478.61
243.216	190.554	-478.61
353.806	156.812	-478.61
340.032	9.65316	-472.028
470.464	50.261	-472.897
303.571	109.42	-469.678
347.965	-95.8518	-469.607
368.109	-169.841	-478.61
513.891	-5.09845	-472.561
494.519	-312.144	-464.615
-182.718	-95.9716	-389.907
177.518	283.99	-398.61
254.003	300.291	-398.61
296.547	298.019	-394.592
145.738	257.499	-394.057
232.033	12.349	-398.61
324.547	120.01	-398.61
299.049	166.473	-395.049
141.288	123.053	-392.985
307.49	149.137	-392.061
307.72	52.4637	-392.525
345.782	145.483	-392.448
195.54	81.1851	-391.392
257.628	86.0322	-391.103
466.505	67.7611	-398.61
492.753	-6.56424	-398.61
561.203	-89.6705	-398.61
563.052	-223.834	-398.61
-186.188	-182.525	-311.333
128.691	221.231	-318.61
251.44	372.463	-318.61
261.072	202.959	-318.61
294.724	234.357	-318.61
403.492	348.492	-318.61
311.536	202.792	-315.279
323.633	267.754	-313.399
183.589	148.677	-318.61
198.834	128.875	-318.61
265.509	85.9731	-318.61
330.947	-73.9805	-314.876
217.439	26.8391	-311.787
558.387	46.48	-318.61
516.923	24.7368	-313.1
457.116	-97.6967	-310.231
514.322	-268.296	-311.795
468.54	-208.723	-309.502
313.194	231.391	-234.677
349.275	254.572	-232.794
203.667	185.226	-230.241
362.175	218.045	-230.78
375.068	275.101	-230.629
131.318	101.337	-230.583
302.886	50.9099	-231.161
331.906	-161.543	-234.546
579.558	5.03608	-232.361
440.47	-211.151	-233.231
-151.225	-226.761	-228.205
138.534	286.928	-228.333
274.06	395.682	-227.916
321.984	190.884	-228.567
423.258	143.616	-224.225
-165.411	-153.464	-150.6
245.923	239.369	-152.339
367.836	352.902	-149.516
218.36	139.279	-150.236
235.994	141.665	-150.286
376.804	164.471	-150.474
415.321	6.20903	-152.648
567.892	-55.0643	-153.346
524.2	12.8732	-149.185
222.185	357.448	-145.604
407.209	213.522	-145.328
96.8669	207.13	-141.93
259.927	227.777	-141.93
406.206	356.285	-141.93
255.586	48.315	-143.916
337.442	-9.45045	-145.194
285.862	1.34505	-141.93
438.692	255.497	-146.322
521.909	101.794	-141.93
75.7817	204.743	-71.8739
166.982	277.878	-77.0455
192.837	279.978	-74.5653
185.654	170.81	-74.059
222.209	184.845	-72.3906
236.502	166.525	-71.6745
276.382	155.509	-72.2797
301.326	319.759	-73.5827
372.936	177.207	-72.8254
172.217	258.782	-70.4184
282.143	175.363	-71.106
399.088	303.938	-71.0736
265.255	56.9008	-78.61
391.494	-83.8242	-70.2108
396.894	-277.512	-73.447
446.773	199.499	-70.9587
538.751	-402.246	-72.7476
543.118	-477.588	-73.5424
571.617	-480.23	-72.4261
601.82	-264.721	-71.837
626.908	-280.174	-69.321
5.27811	-68.7866	-67.3245
-20.2735	-96.2569	-61.93
245.245	327.722	-67.3882
399.617	196.829	-68.4221
429.852	152.898	-64.9813
243.755	-308.305	-61.93
554.073	-458.513	-67.9275
-178.572	-261.269	-795.83
-193.662	-246.759	-795.83
185.462	62.769	-795.83
148.143	192.771	-790.27
441.316	7.81711	-793.05
228.104	89.5418	-790.27
342.384	-231.225	-790.27
387.274	-228.093	-790.27
554.544	-524.375	-793.05
576.534	-141.922	-711.347
345.308	-414.276	-708.768
607.826	-30.8476	-710.202
242.036	84.9974	-710.27
254.779	208.736	-715.83
169.149	262.564	-713.05
431.689	250.842	-713.99
-262.304	-128.838	-709.98
-135.869	-221.438	-704.71
152.47	150.257	-715.83
325.057	300.794	-710.376
372.178	71.2892	-710.412
390.605	101.006	-710.074
408.668	-7.02621	-713.57
190.732	63.2886	-710.27
220.214	13.4015	-713.05
143.649	296.006	-710.27
328.191	161.876	-713.246
-226.298	-193.88	-634.765
123.069	143.734	-638.61
350.262	191.527	-638.61
323.981	195.98	-635.83
307.185	198.699	-638.61
296.188	174.759	-638.61
319.048	152.55	-638.61
167.638	295.976	-638.61
285.846	68.8068	-638.61
299.157	42.6616	-636.255
202.725	34.1204	-638.61
363.684	32.3105	-637.563
405.338	90.5278	-638.61
355.806	-45.4341	-638.114
518.762	21.1469	-634.592
622.148	-29.9203	-637.826
173.793	71.6414	-553.043
195.459	139.787	-547.482
182.625	240.533	-553.042
331.93	-67.4964	-550.256
533.02	151.307	-553.028
380.507	172.286	-550.254
360.131	-447.304	-547.475
414.712	-254.317	-470.27
455.426	-248.152	-467.49
358.493	49.3492	-470.27
376.134	11.6714	-470.27
409.457	146.716	-470.27
341.62	173.407	-470.27
283.388	183.743	-473.05
191.678	213.78	-473.05
282.809	-23.3919	-473.05
307.486	23.5601	-470.27
358.775	-13.2448	-470.27
355.229	77.6819	-470.27
420.363	254.377	-387.49
383.835	137.183	-390.27
302.926	69.9024	-390.27
314.01	35.4767	-384.71
367.635	7.41886	-387.49
435.71	-66.3448	-393.05
348.033	-285.131	-384.71
255.53	30.9338	-395.83
213.661	45.6082	-381.93
356.362	-97.5675	-395.83
396.609	206.89	-393.05
489.527	-171.237	-313.05
278.06	15.1527	-307.49
235.661	20.8484	-315.83
220.261	-5.02148	-304.71
414.799	93.9518	-313.05
350.097	189.235	-301.93
385.906	261.179	-310.27
259.365	199.348	-307.49
204.818	233.588	-307.49
183.452	237.461	-304.71
167.921	388.269	-313.05
507.44	-127.734	-304.71
-287.273	-160.271	-227.49
202.603	123.947	-233.05
235.384	170.426	-233.05
190.872	229.068	-233.05
402.363	321.68	-224.71
378.11	186.749	-238.61
404.66	167.305	-227.49
457.516	99.6605	-235.83
505.84	-331.388	-230.27
133.57	136.807	-235.83
208.018	3.1059	-153.05
326.574	10.032	-158.61
308.004	-41.9186	-150.27
293.365	-332.533	-155.83
567.515	56.8897	-147.49
375.318	106.666	-153.05
350.599	121.997	-153.05
417.433	169.752	-147.49
339.49	210.587	-147.49
339.911	234.658	-155.83
131.891	212.495	-155.83
202.389	70.9489	-155.83
279.484	211.704	-155.83
419.836	-392.938	-67.49
358.008	-345.351	-64.71
484.637	-428.768	-61.93
282.747	-36.8243	-75.83
100.979	-12.8435	-64.71
48.4136	44.4582	-75.83
53.2852	195.881	-73.05
200.68	77.4326	-64.71
293.269	83.7131	-70.27
316.876	116.139	-75.83
385.887	125.574	-70.27
360.226	51.7029	-75.83
318.417	0.880966	-73.05
293.825	21.1391	-75.83
275.273	231.47	-67.49
252.244	220.193	-73.05
220.044	227.599	-73.05
-241.22	-56.8296	-73.05
-159.675	-108.098	-70.27
420.668	184.858	-64.71
612.824	-307.754	-67.49
604.586	75.0775	-791.714
661.491	264.118	-794.579
463.664	88.2874	-798.38
452.314	144.295	-798.38
429.251	71.4778	-798.38
421.032	119.845	-798.38
402.588	16.0275	-798.38
366.444	67.4724	-798.38
453.003	13.7473	-795.429
323.952	11.0779	-793.648
280.405	-107.762	-793.633
263.249	-101.296	-795.836
455.733	121.24	-792.477
433.308	42.1351	-791.309
372.643	106.82	-793.382
344.97	17.3901	-791.414
308.277	90.2815	-793.312
515.25	122.886	-789.508
497.645	-70.1903	-789.705
482.023	154.145	-788.473
430.723	146.028	-789.226
422.462	-61.623	-789.142
427.292	160.147	-798.38
450.893	159.811	-793.908
522.01	189.75	-792.879
453.793	180.75	-789.34
37.2602	-78.866	-798.38
149.354	52.5931	-795.196
245.609	82.117	-791.147
92.3978	-65.0687	-787.837
13.8868	-109.003	-789.537
147.849	261.552	-798.38
116.1	226.675	-798.38
121.279	213.692	-794.437
-157.943	-219.093	-790.285
-154.543	-138.747	-790.857
486.166	-260.292	-784.568
555.744	-21.6269	-784.533
171.003	52.3756	-784.832
227.121	319.034	-786.796
-129.366	-168.816	-786.701
583.181	10.2545	-718.38
410.167	66.974	-718.38
407.497	90.7637	-718.38
417.462	-53.8122	-718.38
381.14	62.6545	-718.38
343.303	52.7538	-718.38
497.435	-101.22	-712.647
381.897	70.105	-713.006
600.315	142.118	-718.38
533.725	195.714	-718.38
487.484	270.209	-718.38
438.135	364.25	-718.38
443.493	150.314	-718.38
420.155	139.282	-718.38
412.22	161.162	-718.38
370.637	278.007	-718.38
364.154	221.099	-718.38
357.155	123.905	-718.38
345.672	211.762	-718.38
444.469	207.125	-714.153
536.101	239.633	-711.484
437.279	261.722	-712.724
188.454	-224.818	-718.38
236.191	108.305	-718.38
195.143	72.926	-718.38
127.166	7.39923	-718.38
117.197	54.4163	-718.38
335.571	-25.3978	-715.042
317.359	102.042	-714.598
219.177	-93.5899	-713.968
200.127	40.4762	-715.792
331.355	55.8384	-712.428
90.4336	-1.55834	-713.139
323.649	199.508	-718.38
290.099	142.104	-718.38
263.733	337.078	-718.38
257.845	308.551	-718.38
230.267	375.217	-718.38
215.553	367.559	-718.38
194.164	147.24	-718.38
145.911	136.939	-711.457
111.374	270.595	-712.142
-14.3358	-87.3029	-718.38
-280.934	-154.952	-718.38
-75.0266	-118.411	-712.632
-369.146	-362.252	-712.802
-589.784	-11.3337	-718.38
533.201	6.34202	-638.38
502.668	-159.746	-638.38
480.055	-4.36424	-638.38
476.793	-90.5332	-638.38
411.053	19.0394	-638.38
392.13	-200.698	-638.38
359.355	54.5398	-638.38
338.145	44.2133	-638.38
297.992	-19.4949	-638.38
427.471	-10.833	-633.697
547.781	108.581	-638.38
469.539	374.391	-638.38
470.143	303.013	-638.38
457.153	150.297	-638.38
439.87	258.656	-638.38
430.256	276.388	-638.38
380.573	187.73	-638.38
360.057	130.761	-638.38
349.805	191.469	-638.38
344.585	333.865	-638.38
339.734	368.753	-638.38
338.203	164.539	-638.38
324.218	120.413	-638.38
309.074	181.722	-638.38
266.475	204.299	-638.38
480.777	183.628	-636.403
466.812	134.177	-633.86
374.272	106.479	-635.868
312.559	155.162	-634.835
301.34	207.879	-636.36
546.449	206.424	-631.632
373.758	357.906	-631.781
358.765	402.801	-634.892
251.655	59.9877	-638.38
245.796	-221.955	-638.38
239.205	-31.3455	-638.38
166.9	21.8737	-638.38
88.631	4.01622	-638.38
78.7644	-7.85631	-638.38
75.1025	28.3995	-638.38
49.6898	28.1872	-638.38
32.1602	-18.239	-638.38
6.26722	-97.78	-638.38
240.279	157.157	-638.38
195.027	184.157	-638.38
183.601	141.752	-638.38
142.578	250.989	-638.38
136.774	66.935	-638.38
133.465	124.188	-638.38
47.3867	70.0349	-638.38
217.625	269.405	-634.877
117.961	169.919	-633.941
-212.812	-303.734	-638.38
-311.464	-337.009	-638.38
-329.977	-323.149	-638.38
-159.854	-63.8921	-638.38
-169.712	-195.883	-638.38
-212.091	-188.445	-638.38
-247.514	-191.016	-638.38
-195.159	-63.7177	-636.16
593.804	222.142	-558.38
552.686	-430.753	-558.38
530.643	-258.102	-558.38
529.121	-293.239	-558.38
518.303	-317.111	-558.38
389.243	-328.288	-558.38
519.718	71.2816	-558.38
388.032	27.9922	-558.38
350.473	53.2846	-558.38
351.403	5.54092	-558.38
307.644	-46.0188	-558.38
272.538	29.7324	-558.38
247.72	58.9347	-558.38
245.216	32.6758	-558.38
450.659	37.1712	-554.081
405.152	18.2378	-556.744
339.538	9.55062	-553.372
535.738	368.224	-558.38
522.516	162.933	-558.38
507.116	278.015	-558.38
489.398	165.691	-558.38
487.397	115.301	-558.38
473.22	360.303	-558.38
458.303	258.212	-558.38
401.054	166.892	-558.38
392.039	129.838	-558.38
373.785	318.346	-558.38
377.981	104.527	-558.38
359.229	301.846	-558.38
363.243	216.551	-558.38
360.356	239.296	-558.38
317.429	129.801	-558.38
303.771	331.246	-558.38
278.881	363.916	-558.38
266.783	139.777	-558.38
265.066	160.393	-558.38
551.462	204.185	-554.718
451.705	156.593	-552.121
367.391	164.846	-552.388
313.66	273.654	-552.123
406.773	389.837	-549.557
307.588	438.096	-556.207
242.28	-34.9271	-558.38
231.589	4.15977	-558.38
216.848	27.1969	-558.38
216.076	-13.3663	-558.38
200.809	-12.3302	-558.38
130.483	31.5407	-558.38
106.141	3.87046	-558.38
91.1917	35.2953	-558.38
33.9018	-161.52	-555.754
59.3533	-29.0374	-553.257
28.9838	-93.276	-550.342
163.156	229.257	-558.38
160.222	188.263	-558.38
141.889	130.393	-558.38
26.4503	92.3216	-558.38
165.573	373.078	-551.599
121.214	335.87	-550.749
-268.463	-283.589	-558.38
-177.556	-182.843	-558.38
-88.5677	-164.255	-551.816
-304.422	-275.837	-552.716
-120.82	83.1844	-558.38
-290.377	54.9981	-554.704
-317.499	223.903	-551.878
641.598	-292.358	-467.194
599.276	-4.15506	-469.42
601.886	217.367	-470.708
585.24	191.034	-468.91
467.845	-356.527	-478.38
426.732	-292.724	-478.38
499.579	-294.357	-471.524
398.294	-335.649	-467.974
478.427	28.4933	-478.38
221.399	24.0094	-478.38
230.845	29.6445	-474.545
528.349	-216.665	-471.257
521.828	-197.294	-471.3
508.066	-3.99454	-471.424
376.629	28.8886	-469.089
269.897	-129.005	-467.478
460.758	129.122	-478.38
443.979	233.146	-478.38
322.107	148.307	-478.38
240.965	130.412	-478.38
217.349	130.558	-478.38
497.178	84.3899	-473.895
441.104	287.256	-476.139
441.842	128.276	-475.771
402.784	61.8569	-474.582
380.399	130.531	-474.068
358.829	244.384	-475.583
352.314	258.577	-475.012
352.176	181.701	-475.72
289.309	150.838	-474.112
277.303	189.635	-474.115
263.871	111.266	-474.266
218.903	149.452	-474.561
215.927	158.326	-474.471
217.937	85.6472	-473.652
357.97	68.0802	-471.761
343.288	217.995	-472.373
345.143	85.0636	-472.176
300.955	239.983	-472.353
266.731	205.111	-473.039
250.231	159.911	-472.54
475.444	251.678	-470.045
468.304	143.266	-468.347
365.966	274.356	-468.615
95.7481	28.1144	-470.81
108.21	36.5009	-469.237
102.4	-57.1307	-469.146
201.446	117.219	-474.258
181.831	100.669	-473.75
141.739	175.507	-473.864
133.456	249.078	-474.65
122.119	222.455	-476.457
155.002	273.279	-471.934
122.652	50.9758	-471.608
96.0703	220.91	-472.76
93.6336	54.2824	-468.537
-215.504	-263.093	-473.677
-222.036	-163.581	-473.662
-279.968	64.839	-467.781
592.614	85.3782	-465.746
333.226	-62.8764	-465.638
408.177	428.319	-465.951
206.109	50.7789	-466.711
102.762	135.925	-465.841
51.1857	41.2958	-463.941
-108.973	-296.208	-466.241
417.9	-385.631	-394.991
479.948	-377.357	-392.422
396.714	-351.519	-392.976
292.117	41.2065	-394.341
553.835	36.447	-391.062
511.62	-100.856	-391.861
429.376	25.4962	-390.905
411.662	39.6721	-390.853
411.52	-14.2166	-392.753
403.448	56.0888	-392.151
322.393	59.4256	-388.505
448.028	271.339	-394.175
435.507	223.178	-393.723
532.232	232.322	-392.969
460.755	216.316	-391.61
437.764	265.508	-393.426
432.98	141.677	-390.9
419.104	296.837	-391.5
406.49	155.756	-391.44
382.817	284.119	-391.225
379.031	102.304	-393.397
368.275	256.798	-391.513
369.522	138.488	-390.491
346.51	163.265	-393.031
325.29	115.739	-391.539
321.873	157.603	-392.83
243.434	293.701	-392.856
519.582	204.018	-387.238
470.428	296.315	-388.466
312.806	163.483	-389.787
478.006	402.457	-390.549
430.691	394.749	-388.583
293.4	418.225	-388.661
239.081	-28.7029	-391.83
150.869	-230.078	-392.587
132.996	49.1682	-391.513
-34.1649	-9.68748	-390.997
232.486	27.8663	-388.13
114.26	5.89905	-389.614
-59.6174	-160.747	-388.181
236.473	69.5402	-393.099
209.718	283.254	-392.321
201.584	260.098	-392.808
186.019	145.082	-391.752
184.447	116.061	-393.146
154.955	88.8361	-392.004
149.033	204.065	-391.695
138.868	341.759	-391.157
192.12	233.731	-388.922
167.665	247.812	-389.526
134.891	64.7418	-389.679
-68.2181	-57.7336	-390.95
-67.4112	-117.194	-390.671
-174.415	-278.478	-392.394
-266.36	-35.7713	-391.636
-286.766	-41.4552	-390.848
-93.24	-182.099	-388.904
-254.49	-208.754	-389.28
-287.278	-259.599	-389.258
533.138	318.687	-385.361
331.984	231.909	-385.844
36.5362	-145.307	-384.897
-29.3323	-141.675	-385.511
87.931	-93.8672	-383.61
-249.823	-154.084	-385.183
544.245	161.819	-313.144
560.202	189.434	-314.453
540.431	288.686	-316.485
548.996	245.956	-312.29
428.787	-386.806	-318.38
396.874	-265.625	-318.38
391.081	-303.663	-313.169
304.729	-340.145	-313.341
536.061	91.8082	-318.38
541.577	-44.8816	-313.898
506.673	64.8473	-314.413
487.978	45.6841	-315.426
490.931	-137.515	-316.01
397.998	122.485	-315.883
359.804	99.5553	-315.19
259.582	100.568	-314.28
259.961	74.986	-316.469
231.266	55.6806	-316.123
395.039	-50.2639	-311.392
298.236	72.1459	-313.275
278.513	86.1938	-312.772
264.278	-81.1009	-312.834
490.435	158.92	-318.38
456.951	160.048	-318.38
423.635	251.67	-318.38
411.522	200.565	-318.38
467.939	284.598	-314.578
455.89	249.972	-313.847
457.39	213.954	-315.356
450.662	271.334	-314.33
427.876	215.954	-314.703
402.959	188.903	-314.62
396.744	231.373	-316.089
370.872	351.434	-314.257
378.458	195.586	-313.656
368.458	291.023	-315.649
304.655	239.397	-313.944
301.02	301.913	-314.858
221.897	313.701	-315.965
437.181	305.312	-312.136
385.123	256.238	-312.176
373.098	163.774	-312.051
371.65	178.702	-312.528
288.909	209.087	-313.319
252.464	305.255	-312.262
249.998	197.499	-312.908
273.723	452.265	-309.976
202.423	95.3055	-316.066
164.691	88.4175	-314.1
124.098	78.753	-314.283
106.889	-0.897205	-313.759
179.892	116.504	-313.31
136.19	-98.2366	-312.635
121.867	107.887	-312.983
95.9963	-55.0265	-312.631
80.4911	-16.1241	-312.33
78.7159	-29.4819	-312.682
32.1937	-44.6791	-311.53
102.542	80.3594	-310.004
43.1714	-78.5312	-309.138
145.417	252.471	-314.31
150.155	158.348	-310.913
97.3626	399.028	-311.184
41.7092	144.041	-312.456
-139.403	-223.945	-312.527
-348.826	-329.552	-311.019
-364.034	-336.868	-311.019
-197.701	-207.314	-313.703
-228.902	-124.03	-314.012
-243.912	-155.865	-314.949
-117.161	111.332	-312.486
-110.76	-78.3055	-311.958
-104.195	-196.192	-311.786
-119.749	-169.321	-313.212
-148.87	-140.996	-312.409
-217.315	-207.179	-313.388
-230.854	-174.618	-313.292
-305.855	-192.386	-311.128
-299.712	338.942	-310.1
551.024	239.712	-233.166
404.694	-324.011	-238.38
496.009	-8.67289	-238.38
486.325	18.4485	-238.38
439.464	-55.1605	-238.38
336.692	40.5926	-238.38
335.096	20.9862	-238.38
294.339	18.1104	-238.38
251.934	94.066	-238.38
430.152	25.8671	-235.458
297.328	-20.7572	-234.275
449.362	-99.2095	-231.043
451.993	148.929	-238.38
440.01	223.906	-238.38
416.77	234.274	-238.38
419.01	158.475	-238.38
396.431	214.246	-238.38
386.797	285.137	-238.38
350.096	405.347	-238.38
363.497	188.755	-238.38
304.375	267.162	-238.38
312.895	158.5	-238.38
288.866	176.372	-238.38
259.725	127.819	-238.38
249.829	109.502	-238.38
221.626	179.609	-238.38
204.392	212.038	-238.38
390.984	295.802	-233.615
380.787	316.179	-233.768
373.056	393.503	-235.51
382.416	245.76	-234.113
341.854	180.875	-234.96
352.423	250.227	-231.991
290.246	389.922	-228.222
211.886	39.0283	-238.38
176.738	35.4322	-238.38
111.444	57.1757	-238.38
111.957	39.6326	-238.38
129.721	59.444	-231.81
110.307	82.001	-230.417
21.7845	-59.4014	-232.427
113.733	-6.19194	-229.356
-3.53914	46.4423	-228.315
156.962	257.573	-238.38
151.475	244.661	-238.38
142.108	241.902	-238.38
147.322	147.649	-238.38
136.533	230.536	-238.38
132.092	251.143	-235.272
106.19	147.968	-235.129
-236.337	-175.705	-238.38
-384.337	-170.661	-238.38
-148.454	-115.401	-236.524
-226.987	-208.496	-232.429
-297.155	-236.629	-231.619
653.188	-11.2394	-153.448
455.056	-246.6	-150.711
378.637	-293.111	-151.534
606.79	-413.588	-148.638
324.313	-307.027	-149.171
503.224	79.5896	-158.38
432.555	-150.464	-153.667
339.815	-13.9616	-155.17
628.874	-144.876	-153.153
627.722	-168.26	-153.005
445.475	73.7907	-152.825
353.026	53.5422	-152.814
355.287	-52.8076	-149.062
496.501	116.764	-155.154
481.597	127.316	-155.957
381.172	157.577	-156.724
358.643	113.567	-154.371
336.936	192.042	-153.813
482.132	110.357	-153.297
413.095	214.368	-152.819
385.541	223.691	-150.856
352.133	238.781	-151.909
330.29	335.084	-151.633
317.186	274.695	-152.98
500.319	184.41	-148.086
498.837	213.016	-148.179
398.07	131.403	-147.75
296.849	341.152	-148.899
258.912	55.0852	-154.482
294.982	-164.921	-150.758
269.945	-30.8219	-151.096
241.651	-1.09088	-150.874
196.488	59.3854	-151.038
87.3199	2.56097	-152.365
274.012	-57.922	-149.598
168.42	-52.4161	-148.385
285.862	224.206	-151.094
285.332	281.446	-149.577
268.557	369.248	-147.383
202.091	110.311	-149.815
136.977	176.503	-148.611
123.098	144.925	-148.506
108.338	236.797	-149.744
-221.527	-286.015	-151.381
-265.909	-260.262	-148.234
-268.424	-183.896	-147.518
-110.991	94.4808	-148.256
-121.557	109.204	-148.537
356.544	39.5564	-146.31
414.284	248.978	-145.64
360.253	265.799	-145.305
447.193	378.475	-142.48
159.525	48.289	-144.601
293.927	138.515	-146.579
269.257	389.946	-145.198
276.282	103.204	-144.965
145.711	134.958	-145.136
127.353	289.267	-146.076
149.267	385.359	-140.96
173.73	344.968	-138.94
-73.7696	-91.1042	-145.857
-255.687	-200.885	-145.205
-326.926	-109.169	-145.145
750.645	-111.204	-78.38
731.236	-15.2252	-78.38
661.466	-19.2083	-78.38
632.809	-150.309	-78.38
585.264	-90.9399	-78.38
430.24	-270.039	-78.38
424.235	-308.444	-75.6171
275.034	-372.249	-75.6279
405.793	-223.159	-78.38
355.834	53.2189	-78.38
263.611	7.06424	-78.38
452.579	292.975	-78.38
449.436	204.343	-78.38
442.871	248.302	-78.38
426.382	221.039	-78.38
400.136	235.857	-78.38
394.142	208.58	-78.38
384.314	288.381	-78.38
383.758	251.848	-78.38
382.3	184.569	-78.38
375.558	223.291	-78.38
359.491	388.551	-78.38
362.245	114.156	-78.38
347.165	373.466	-78.38
301.664	236.778	-78.38
278.149	281.722	-78.38
398.232	313.814	-74.2621
384.088	326.398	-73.5615
357.159	217.125	-75.7492
250.725	315.609	-72.3393
403.54	416.528	-71.0283
247.706	62.8102	-78.38
131.955	33.4123	-78.38
120.918	-0.622769	-78.38
118.193	36.5861	-78.38
94.3137	10.876	-78.38
60.7361	-48.8912	-78.38
39.8614	13.7642	-78.38
4.61266	-81.151	-78.38
1.72781	-107.652	-78.38
56.3078	30.1247	-75.5091
161.941	105.572	-78.38
122.497	236.546	-78.38
241.76	238.604	-71.559
144.842	268.932	-71.8235
237.153	359.207	-69.4067
-163.671	-264.363	-78.38
-241.335	-267.287	-78.38
-101.198	-128.716	-78.38
-252.148	135.097	-78.38
-266.722	143.138	-78.38
