# Supplementary material for: Spinal premotor interneurons controlling antagonistic muscles are spatially intermingled
Source: eLife. 2022 Dec 13;11:e81976. doi: 10.7554/eLife.81976 (PMC9844990; doi:10.7554/eLife.81976)
Supplement: Figure 3—figure supplement 2—source data 11. [file elife-81976-fig3-figsupp2-data11.xlsx]

## Sheet: Sheet1
-548.12	193.15	24
-334.06	-232.12	18
-267.19	-162.55	14
-280.89	-194.32	12
-235.54	-228.41	4
322.26	503.3	32
611.14	174.96	28
623.56	13.54	28
647.69	48.62	26
366.63	43.26	24
306.94	99.16	32
207.85	273.83	26
359.12	381	26
531.88	245.72	32
115.14	488.07	22
462.46	297.32	20
435.17	226.64	22
374.21	149.32	20
535.2	191.7	18
403.83	47.35	10
539.17	45.03	2
338.43	109.2	18
437.79	68.55	2
432.63	-35.63	2
441.5	7.09	10
341.08	41.92	16
482.81	-208.29	16
408.45	-105.3	14
444.14	-208.59	10
438.86	-370.13	10
489.32	-221.31	24
540.06	-273.86	26
410.86	-327.01	22
552.06	-151.86	12
519.93	-222.54	0
542.37	-85.74	0
528.95	-59.07	4
486.54	-374.02	6
-586.25	284.49	242
-495.78	-94.79	264
-196.8	-190.59	258
15.9	-77.35	256
-221.63	-271.58	246
5.87	-111.33	230
-221.66	-153.45	232
-181.23	-178.72	228
462.29	292.48	274
349.98	131.76	272
255.06	249.25	268
437.15	271.82	268
478.45	266.41	268
485.32	208.18	266
228.66	79.11	266
367.57	25.16	262
393.14	162.61	262
450.21	196.23	264
458.26	169.85	264
442.44	188.22	260
579.94	169.93	262
401.17	155.23	256
577.57	-3.73	256
286.71	37.89	256
283.97	91.01	252
352.04	177.71	250
170.96	171.24	246
184.22	79.47	250
231	97.16	250
301.71	148.52	248
262.2	72.57	244
499.23	204.48	242
397.84	179.69	242
415.86	86.41	244
211.5	108.48	240
397.64	66.53	238
332.74	49.97	236
316.99	95.42	234
195.27	94.54	234
420.24	1.25	242
529.18	-8.39	244
380.98	26.34	248
205.74	223.23	244
151.08	325.28	240
79.46	356.43	252
209.09	334.99	260
120.73	499.37	260
410.68	178.08	272
634.91	22.22	268
613.19	-23.56	266
498.73	-110.69	262
332.22	-87.9	262
441.43	-358.13	260
350.46	-31.89	252
646.57	1.45	252
559.33	-262.97	252
570.82	-248.95	252
500.57	-175.62	236
423.16	-113.03	240
259.7	-60.39	240
628.08	-454.65	250
326.61	-17.43	232
-201.93	-175.42	502
-263.58	72.09	502
-229.35	-234.85	508
207.98	339.79	510
255.59	284.29	510
278.23	259.85	506
568.24	65.16	508
200.34	133.02	498
269.24	194.05	482
590.98	76.27	500
483.24	-18.04	502
405.99	44.17	482
548.98	-173.59	502
593.75	-193.14	496
350.9	-369.57	494
370.76	-78.83	492
480.89	-37.54	488
-239.53	5.02	746
-222.81	-222.76	738
-243.68	-131.77	722
-72.74	73.44	724
88.07	146.9	716
-320.79	-300.9	730
152.08	164.18	744
200.79	256.12	752
383.46	-18.59	746
308.41	59.37	746
606.82	63.7	744
428.47	140.66	744
411.23	122.76	738
233.83	114.77	728
279.18	287.12	728
339.53	26.06	726
432.01	34.15	720
515.58	-38.26	720
340.38	119.88	716
525.02	-58.61	744
461.48	-86.31	742
522.44	-257.82	742
465.98	-250.69	728
367.82	-362.47	736
609.12	-231.23	710
387.6	-12.34	28
-114.17	-205.22	22
-333.4	-335.13	26
213.56	-0.19	8
75.17	16.64	6
222.02	-33.78	4
287.61	-26.53	2
321.19	-45.98	0
-159.41	-154.41	4
-272.5	-202.16	4
-284.78	-220.09	0
-97.27	-175.96	8
-232.16	-160.17	12
-202.39	-158.19	6
-267.01	-250.09	4
471.23	113.47	32
332.52	83.89	30
263.17	337.21	32
177.77	328.7	30
171.05	302.55	28
571.68	376.93	28
522.85	206.67	26
474.43	210.76	24
464.92	311.81	24
371.62	207.4	26
579.18	111.73	30
448.52	55.72	28
460.27	188.85	30
509.83	328.71	32
386.17	199.52	32
372.15	141.76	30
226.51	142.37	28
285.34	156.18	24
397.78	77.89	22
371.47	97.95	22
474.65	140.6	24
473.5	96.94	22
190.79	120.19	22
147.65	496.73	20
428.97	128.02	14
463.63	172.51	12
563.45	158.85	14
642.8	176.31	18
588.86	260.31	16
245.11	315.94	14
466.86	41.6	16
301.04	119.3	20
370.16	195.56	20
590.69	174.84	22
465.19	449.36	18
441.17	243.62	6
485.89	211.46	4
508.92	223.58	4
511.39	264.81	8
483.37	171.79	4
224.76	207.36	4
289.82	238.76	0
107.85	166.72	0
638.75	81.31	4
608.3	104.65	4
262.15	126.2	4
223.35	135.12	10
519.15	19.48	6
553.48	-232.09	30
342.25	25.37	2
537.19	-11.94	4
459.29	-45.48	6
550.28	-149.33	8
518.54	-178.2	10
476.33	5.25	24
347.98	59.91	28
557.6	55.7	28
478.83	-238.1	4
854.92	-20.84	0
604.89	-314.39	24
529.7	-313.59	28
433.42	-420.28	8
446.71	-254.96	0
-515.73	62.15	244
-386.37	195.37	238
-279.98	40.49	248
-300.59	-285.89	232
-260.57	-201.52	228
-275.4	-204.09	224
225.74	321.3	252
266.68	326.45	252
302.29	350.77	252
617.74	254.31	250
544.78	246.24	248
516.64	242.09	250
505.72	225.73	252
485.89	241.32	252
428.65	241.97	250
380.42	393.07	250
529.05	394.29	244
199.71	280.44	242
239.62	571.76	244
496.09	246.13	240
588.16	263.38	242
228.87	308.52	234
490.24	273.4	232
616.75	265.83	230
558.78	255.37	228
394.56	273.62	220
436.66	251.45	222
553.42	276.67	222
436.08	457.75	230
209.58	237.4	228
424.54	215.63	252
360.36	21.46	248
390.2	103.32	248
275.11	45.39	250
436.34	117.31	242
454.89	157.93	242
525.34	35.73	240
239.92	197.01	240
405.5	0.54	238
374.98	42.7	236
261.31	43.86	234
372.1	84.12	234
416.36	174.78	234
379.76	141.55	236
339.09	132.81	228
386.03	199.32	230
449.45	212.11	232
475.43	143.65	228
443.12	191.31	224
327.99	43.91	224
264.49	5.89	224
272.82	-59.31	226
444.39	45.89	230
431.92	17.07	230
517.36	38.4	232
341.71	21.6	220
353.61	194.12	222
588.41	25.25	252
648.34	2.05	248
585.76	-69.84	246
794.43	2.43	238
615.25	239.95	234
612.49	6.18	230
544.62	115.3	226
575.75	127.99	230
580.75	85.25	222
528.43	16.36	220
540.59	144.89	220
522.84	112.59	242
548.93	171.73	244
604.82	216.38	242
559.9	221.64	248
622.78	191.89	242
557.06	-51.64	218
367.16	-88.01	252
326.08	-230.33	252
439.77	-192.58	252
368.69	-225.75	244
562.8	-209.21	240
716.87	-104.7	238
489.84	-119.55	236
615.82	-77.03	232
526.57	-186.99	230
514.48	-208.71	228
514.47	-115.68	224
608.49	-204.59	222
408.57	-345.58	224
501.42	-97.32	244
497.9	-475.15	242
481.3	-230.16	238
-206.57	56.31	506
-428.14	-232.9	494
-190.15	-173.04	486
-276.13	-216.74	486
-362.06	-118	484
-209.79	-50.78	476
-254.08	60.54	478
344.02	256.08	512
381.69	98.4	508
120.59	216.65	498
275.19	104.82	496
416.27	64.4	494
424.76	102.7	488
137.1	167.38	488
312.11	216.49	482
141.52	441.24	494
516.1	94.9	486
483.4	4.54	512
521.9	-10.76	512
303.86	-10.78	504
299.97	18.11	502
413.2	-169.91	504
508.11	-82.2	504
489.15	-118.77	500
588.59	-99.15	492
424.89	-31.81	506
591.9	-93.91	506
185.89	-12.28	504
522.07	-135.79	496
343.47	-143.6	486
574.58	-34.2	484
507.18	-144.02	480
-237.61	-242.54	752
-345.47	-320.89	754
-266.2	-244.25	748
-455.75	-98.5	736
-164.06	-258.14	730
-304.89	-300.9	726
-342.28	-265.65	728
384.1	530.86	742
524.89	695.11	726
436.94	273.65	752
469.08	169.09	752
474.96	137.58	752
226.54	292.71	754
296.08	234.4	754
286.9	250.58	752
219.44	382.7	750
246.08	358.49	750
304.36	326.41	750
374.21	233.96	754
625.02	202.36	754
513.95	264.26	748
719.22	332.68	744
483.98	261.6	744
505.11	269.82	742
427.74	182.01	746
395.33	206.24	746
358.91	224.84	742
169.16	204.6	742
266.49	226.44	738
255.71	162.19	738
156.86	347.01	736
355.97	126.56	736
631.02	163.32	734
432.23	379.35	728
261.61	250.48	730
382.38	255.42	728
425.04	254.58	726
403.72	218.84	724
325.54	201.97	724
239.81	143.27	722
495.97	207.47	722
211.98	315.59	724
487.43	154.92	720
260.65	383.53	728
198.62	352.32	742
471.23	289.94	744
61.67	110.13	742
383.55	293.67	744
593.89	197.4	746
604.89	246.58	750
446.09	245.93	738
634.48	242.55	742
371.71	102.25	752
505.2	44.18	754
351.42	97.71	748
554.76	87.57	746
456.26	16.9	744
372.41	18.89	744
314.78	-59.06	742
151.96	59.31	744
401.45	118.4	746
387.98	99.51	748
429	-16.35	734
478.72	33.12	734
415.98	53.05	734
532.58	38.92	736
505.22	121.82	736
451.4	-81.42	732
357.37	41.74	728
437.68	1.58	726
424.95	26.11	728
589.16	-0.26	724
417.62	-59.35	720
537.41	-75.66	720
550.01	-45.01	722
426.32	65.04	728
635.74	9.6	754
605.5	36.93	720
619.34	58.78	726
635.05	28.03	730
826.78	38.51	736
679.81	86.1	736
591.2	107.76	742
781.46	-2.81	748
654.17	105.7	752
594.28	-74.76	728
541.77	-59.83	744
807.77	-169.85	734
636.16	-421.49	746
292.68	-285.72	720
331.24	-366.23	720
-358.273	-151.828	798.61
-300.019	-220.193	793.05
-173.854	-237.059	793.05
-61.3873	-100.43	795.83
56.5634	28.1715	798.61
277.234	-1.87987	795.83
436.454	101.09	798.61
475.283	71.8443	795.83
433.119	158.949	798.61
247.432	192.688	798.61
244.004	246.015	798.61
215.989	312.224	798.61
462.602	225.066	795.83
489.287	254.338	798.61
604.375	82.3859	798.61
561.745	96.7068	798.61
693.851	38.939	798.61
703.73	-30.3644	798.61
596.799	-117.217	795.83
555.549	-95.864	798.61
625.32	-163.912	798.61
805.882	-282.568	798.61
748.271	-282.728	798.61
480.793	-326.945	798.61
469.247	-339.217	798.61
-317.832	-162.712	798.61
674.065	297.175	793.05
333.122	250.799	793.05
-292.72	-224.226	715.831
-551.397	-106.022	713.052
-339.78	-17.7325	710.271
-310.396	-171.891	710.271
-235.822	-171.673	713.051
-15.3085	-87.9638	710.27
-50.7972	61.6857	707.49
-20.898	110.568	713.05
86.0719	12.1555	713.05
103.552	23.1921	715.83
100.529	58.7492	713.05
76.2611	45.5784	710.27
136.59	98.496	715.829
272.332	34.9247	707.489
379.805	66.1575	715.829
535.357	33.9199	715.828
638.623	100.314	713.048
793.32	116.134	715.827
728.765	111.32	713.047
691.795	260.151	715.827
555.156	193.945	713.048
368.899	279.247	718.608
442.351	-41.8044	713.049
798.466	-211.633	713.047
556.241	-455.615	713.049
493.459	-448.061	713.049
480.801	93.863	718.608
742.545	-90.5304	713.048
701.343	-109.739	718.608
389.885	245.257	713.048
-698.244	-34.7316	627.49
-433.814	-115.527	624.71
-382.373	-131.283	630.27
-320.649	-212.673	633.05
-301.032	-200.381	635.83
-299.673	-244.791	633.05
-222.04	-232.893	627.49
-177.753	-256.656	630.27
-198.522	-206.229	627.49
-153.004	-170.758	635.83
-172.744	-96.0837	627.49
-10.712	-64.8094	624.71
-234.392	-22.5663	627.49
-396.059	183.956	635.83
-476.033	359.906	624.71
-308.875	443.35	630.27
265.757	291.581	633.05
432.249	336.66	633.05
551.044	360.321	627.49
566.506	383.89	633.05
391.677	311.582	633.05
362.262	228.706	627.49
240.034	204.769	627.49
327.403	147.792	633.05
684.182	158.923	635.83
677.205	111.702	635.83
809.075	81.4243	633.05
780.793	170.115	630.27
519.513	181.199	635.83
460.553	119.093	633.05
522.054	96.4562	627.49
474.782	13.1548	633.05
570.263	-17.3944	627.49
304.038	91.6845	633.05
218.792	100.557	633.05
232.384	51.8924	630.27
73.6354	36.6396	633.05
70.0981	-2.56747	627.49
419.768	-148.808	630.27
280.355	-270.593	627.49
461.897	-311.813	630.27
553.172	-213.875	633.05
654.625	-220.502	633.05
854.773	15.1483	633.05
-357.959	50.6925	558.61
-266.605	161.881	558.61
-181.508	110.89	555.83
-83.3554	11.2419	558.61
-113.297	-251.22	558.61
-338.369	-274.061	558.61
-295.019	-283.13	558.61
499.795	-251.256	558.61
529.146	-246.724	558.61
108.216	-44.8772	553.05
30.006	50.972	553.05
288.796	56.8829	553.05
304.944	93.9161	558.61
441.567	48.8704	555.83
465.191	74.4081	558.61
515.156	49.8817	555.83
510.136	155.801	558.61
528.615	216.767	558.61
424.772	294.563	558.61
289.122	286.569	555.83
238.101	296.025	558.61
424.737	260.905	555.83
685.69	241.728	558.61
703.448	319.834	555.83
635.052	344.178	555.83
468.829	293.893	555.83
702.924	232.07	558.61
737.307	221.157	555.83
816.34	-155.322	558.61
818.98	-229.945	558.61
650.51	-362.752	558.61
595.639	-378.989	558.61
23.1625	117.029	475.83
-524.95	292.145	478.61
-668.349	82.2011	475.83
-323.43	-212.656	478.61
-167.117	-158.565	478.61
-193.67	-242.971	475.83
-111.671	-227.298	478.61
-87.8067	-228.709	478.61
-10.6173	-200.152	478.61
-183.604	-293.819	478.61
448.067	-317.748	478.61
629.896	-388.677	478.61
595.18	-276.453	478.61
713.224	-294.604	475.83
831.18	-114.117	478.61
874.197	-102.905	478.61
778.627	55.2247	478.61
576.576	56.7415	478.61
637.484	17.6575	475.83
602.617	-40.383	478.61
541.313	-71.2099	478.61
78.1029	17.5635	478.61
135.091	188.989	478.61
-32.8087	-4.42853	478.61
200.317	114.948	475.83
243.448	128.306	478.61
272.008	270.326	478.61
323.604	318.11	475.83
529.637	259.871	478.61
545.446	200.796	478.61
566.513	156.578	478.61
600.292	205.823	478.61
574.1	294.977	478.61
689.759	255.938	475.83
624.383	322.009	478.61
445.969	98.8753	478.61
460.371	176.362	478.61
797.742	333.792	475.83
-575.092	-77.6343	390.27
-175.16	-216.99	395.83
-81.9193	-336.541	393.05
-59.5082	-255.473	387.49
-118.742	-61.6679	384.71
4.47415	-71.5551	387.49
576.554	-286.942	393.05
662.15	-231.943	393.05
772.029	-321.503	390.27
615.704	-186.412	390.27
629.719	-345.087	395.83
603.214	-378.088	393.05
843.693	2.0438	393.05
712.461	-37.4608	390.27
513.929	-1.08376	390.27
539.149	1.7558	390.27
621.755	41.2602	390.27
406.661	32.2733	393.05
373.132	-16.3408	387.49
312.758	115.588	387.49
234.693	142.215	393.05
206.147	89.8415	390.27
142.414	136.518	390.27
306.692	192.405	393.05
350.972	163.091	390.27
563.312	201.152	387.49
579.926	167.456	393.05
492.641	343.056	393.05
-402.953	35.9124	318.609
-425.279	122.26	310.27
-216.413	-268.633	310.268
-393.024	-236.631	313.048
-178.453	-131.972	307.489
-57.6368	-208.808	313.049
268.414	107.061	313.051
311.013	54.0747	315.831
428.053	93.9057	310.272
388.739	92.7921	313.052
413.833	184.066	313.052
434.13	208.956	307.492
443.639	270.627	313.053
551.466	250.227	307.493
541.386	313.585	315.833
622.976	220.018	307.493
555.631	166.227	310.272
657.182	145.393	310.272
648.986	59.7457	310.272
619.216	10.6147	313.052
788.092	98.8865	313.053
666.323	19.7482	315.832
527.622	-53.7213	318.611
493.822	-161.485	313.05
501.405	-183.144	313.05
613.418	-195.741	315.83
623.947	-258.82	315.83
675.815	-109.719	310.271
928.643	-27.641	315.832
471.015	180.451	310.272
-308.471	78.0224	235.83
-142.666	9.80528	233.05
-361.558	231.628	233.05
-75.7018	-61.4702	230.27
-81.1563	-85.458	230.27
-168.984	-172.876	235.83
-235.541	-131.625	227.49
-234.067	-226.2	238.61
-150.847	-234.102	235.83
-423.852	-145.604	230.27
334.787	57.9413	235.83
249.562	44.4028	235.83
148.714	88.6354	233.05
86.1113	27.5479	235.83
404.509	-0.494099	235.83
455.03	125.181	233.05
287.388	252.702	235.83
229.269	211.357	230.27
513.81	224.118	230.27
418.713	244.197	233.05
575.323	193.253	235.83
566.177	150.423	233.05
634.117	157.317	230.27
625.26	337.81	238.61
712.524	36.0424	233.05
757.664	2.81689	235.83
568.634	0.0157163	238.61
836.126	-112.432	235.83
662.412	-263.185	235.83
586.313	-233.881	235.83
519.109	-316.363	233.05
731.252	-393.791	238.61
-602.262	241.919	155.822
-295.024	362.042	150.271
-526.018	12.0054	150.26
-307.625	-155.909	150.261
-349.424	-216.047	150.259
-286.973	-278.976	150.259
-129.08	-164.369	150.264
-75.7321	-94.718	155.827
-234.096	-20.8638	150.265
402.228	6.79557	150.278
612.328	-19.6914	153.062
550.129	-3.95289	153.061
456.101	-58.5481	150.278
571.931	-225.418	150.277
559.628	-264.08	153.056
669.301	-310.726	153.058
740.846	-343.222	155.839
699.497	-9.01449	150.284
745.614	29.8858	155.845
762.946	60.7327	153.066
821.07	48.2182	155.847
723.273	100.075	153.066
823.393	175.431	153.069
445.683	171.86	155.842
515.256	131.105	155.843
491.71	106.945	153.062
594.535	71.8616	150.283
270.599	141.358	150.278
230.542	83.762	150.276
231.791	114.624	150.277
153.212	40.3014	153.054
85.5014	38.409	150.272
295.656	16.2107	153.056
-228.575	-245.459	147.481
475.99	294.079	70.27
461.88	192.347	73.05
520.494	214.794	78.61
568.545	214.667	70.27
654.77	196.393	75.83
704.987	78.3876	75.83
762.642	97.2146	73.05
591.89	-34.731	70.27
552.403	-27.836	75.83
536.538	-56.6921	73.05
432.644	-20.9692	70.27
353.795	-145.536	73.05
435.441	-143.867	73.05
709.674	-165.578	73.05
642.868	-243.688	73.05
509.238	-323.417	75.83
580.612	-339.576	75.83
-147.776	-164.629	75.83
-197.953	-115.498	70.27
-174.022	-217.713	70.27
-139.846	-226.388	73.05
-65.9714	-145.828	75.83
-105.391	-278.24	70.27
-187.512	-347.145	78.61
329.19	51.6944	73.05
697.671	-280.909	70.27
-167.646	-87.722	9.73
-198.041	267.076	9.73
185.034	53.9722	9.73
275.912	-26.3065	12.51
298.639	56.2334	15.29
362.518	56.9919	12.51
415.256	-5.14212	12.51
444.488	14.1307	15.29
442.435	117.576	12.51
392.418	153.657	12.51
399.819	177.501	15.29
392.779	204.05	12.51
347.694	195.875	15.29
330.925	136.079	12.51
389.834	266.11	15.29
470.729	230.612	12.51
435.03	196.445	12.51
349.27	96.0639	12.51
-290.542	-81.2562	92.51
-221.695	-65.8708	95.29
173.896	98.1806	92.51
151.413	204.183	89.73
279.276	72.1503	89.73
251.302	15.3528	95.29
207.531	-32.8565	95.29
315.707	-45.6507	95.29
407.876	-12.7696	89.73
370.358	49.4942	92.51
413.41	47.5838	92.51
450.794	-14.4812	92.51
481.812	-12.4087	92.51
541.768	5.765	92.51
611.694	7.11953	95.29
439.658	185.968	92.51
367.151	263.994	92.51
703.337	-68.0568	92.51
472.514	-317.148	92.51
569.792	-350.014	92.51
383.943	125.704	92.51
-149.765	-73.9688	175.29
160.947	32.1689	175.29
241.498	14.5561	169.73
331.63	-75.9215	172.51
235.496	-96.0584	175.29
394.186	-325.884	172.51
470.547	-386.119	172.51
309.658	31.1231	169.73
194.329	134.934	172.51
154.695	340.388	175.29
380.838	183.445	172.51
417.5	142.263	169.73
421.897	123.405	169.73
476.565	113.424	172.51
522.083	90.0424	169.73
581.468	82.3095	172.51
548.203	165.348	169.73
654.252	106.842	169.73
437.916	-51.6715	249.73
393.079	-173.565	252.51
517.488	-226.818	249.73
718.073	-313.963	252.51
719.986	-258.962	249.73
690.189	-164.321	252.51
556.126	-366.129	252.51
442.663	-381.857	252.51
286.81	-90.8803	252.51
196.654	-116.639	252.51
118.271	15.0516	252.51
-67.8251	26.884	252.51
-90.3074	64.6979	255.29
225.152	146.595	249.73
261.976	111.275	252.51
291.06	80.1756	255.29
347.414	116.337	255.29
302.122	289.903	249.73
426.495	201.502	252.51
413.046	112.519	252.51
463.814	98.887	252.51
450.278	4.46059	249.73
371.363	-35.9816	252.51
581.766	-27.6233	252.51
439.941	91.8366	252.51
396.436	86.7948	252.51
558.199	226.578	246.95
270.399	149.171	332.51
257.938	180.761	332.51
202.264	159.52	329.73
285.767	92.4769	329.73
311.991	43.7737	329.73
92.7568	88.1735	332.51
252.17	346.955	329.73
446.137	226.767	332.51
423.248	350.637	332.51
529.779	146.631	329.73
533.328	183.346	332.51
390.239	127.455	332.51
493.94	53.0552	329.73
597.457	-24.1056	329.73
628.25	-59.1336	329.73
729.934	-43.7269	329.73
489.723	-354.37	329.73
648.422	-363.237	329.73
496.118	-254.892	329.73
500.715	215.327	412.51
483.26	185.095	415.29
477.376	136.205	412.51
432.615	118.001	409.73
445.806	86.4446	412.51
455.392	51.216	412.51
360.783	143.488	409.73
368.015	18.5095	409.73
244.757	147.933	409.73
152.608	106.011	412.51
130.813	25.3077	409.73
81.9301	-6.50332	412.51
28.2868	9.04811	409.73
200.097	-54.062	412.51
40.7706	19.1179	412.51
-8.73781	-93.808	412.51
-324.835	308.658	409.73
551.238	-180.612	412.51
509.115	-208.265	412.51
585.288	-201.806	409.73
453.124	-114.461	412.51
395.735	-63.7945	409.73
311.357	-39.4322	412.51
352.21	240.843	412.51
325.783	-119.206	495.29
356.677	-78.8593	511.97
248.609	-121.856	492.51
213.363	-113.305	495.29
303.948	-277.296	492.51
360.527	-285.119	492.51
478.131	-361.01	511.97
582.975	-249.302	511.97
621.323	-171.337	509.19
674.822	-66.2132	511.97
480.445	104.095	509.19
463.057	158.522	509.19
433.507	52.204	509.19
487.576	24.6855	511.97
406.505	21.9925	509.19
354.49	27.9156	509.19
367.864	47.2334	492.51
303.632	59.3712	506.41
274.865	-0.93131	509.19
187.294	-3.04651	506.41
209.131	84.168	509.19
133.549	100.545	492.51
119.627	70.1667	509.19
113.609	139.827	495.29
208.953	154.543	495.29
162.119	232.7	495.29
380.665	269.597	495.29
406.655	268.586	495.29
472.098	225.259	492.51
447.136	245.628	495.29
502.584	350.773	498.07
402.631	171.014	506.41
435.562	162.269	495.29
424.225	-78.7573	511.97
-216.602	-175.154	492.51
-94.8251	-149.249	495.29
-14.1438	-83.8167	492.51
3.17909	-121.65	509.19
-297.428	138.661	492.51
-325.127	-17.544	489.73
423.889	-183.449	511.97
241.263	-90.3879	509.19
397.484	257.411	566.95
376.042	209.729	569.73
382.476	180.535	566.95
372.034	159.87	569.73
378.324	139.797	569.73
323.621	141.121	569.73
312.414	184.731	569.73
250.655	231.055	569.73
133.824	207.955	566.95
119.615	291.151	569.73
204.814	83.3976	566.95
215.87	50.9859	569.73
268.523	40.6578	569.73
126.571	43.9624	569.73
11.773	-43.9833	572.51
186.771	-178.932	569.73
419.967	-210.285	575.29
463.48	-93.4561	569.73
540.143	-263.708	569.73
548.26	-237.959	572.51
553.261	-54.4607	572.51
634.976	-18.4836	569.73
493.512	54.7563	569.73
545.978	108.131	569.73
-237.97	-105.11	652.51
70.5599	-12.968	652.509
99.4169	6.45902	652.509
253.791	-34.7813	652.509
447.554	-330.615	652.51
505.885	-81.1848	655.289
532.687	8.71922	652.509
492.236	106.029	655.289
474.049	174.316	649.728
400.562	212.285	649.728
522.629	300.593	652.508
457.094	241.673	652.508
633.703	92.5506	652.509
666.79	-33.5292	652.509
231.087	111.855	649.729
178.101	164.064	652.509
196.57	188.68	652.509
285.329	80.968	649.729
320.437	35.4756	652.509
-416.623	-102.988	735.29
-182.08	-92.5898	735.29
237.928	-92.8064	735.29
465.529	-179.489	732.51
698.605	-281.959	735.29
747.959	-212.806	732.51
659.638	-69.367	732.51
557.434	-0.0534096	732.51
577.494	51.9287	732.51
495.851	126.642	732.51
490.967	102.988	732.51
469.965	153.644	732.51
432.071	153.877	732.51
382.997	133.653	732.51
407.751	55.324	729.73
429.87	53.6268	732.51
409.536	-42.5644	732.51
352.017	-27.9819	735.29
355.386	9.87443	732.51
311.501	66.1795	729.73
312.554	104.875	732.51
290.444	104.222	732.51
221.227	145.701	732.51
162.189	173.696	732.51
175.051	83.6163	732.51
141.621	309.453	5.92993
180.453	205.649	8.11952
190.317	282.979	7.78438
270.852	70.5044	5.70328
278.06	183.478	7.21783
422.143	187.775	10.2882
433.69	237.553	8.96146
359.093	75.1108	7.71244
371.551	-67.5734	8.32591
379.273	125.742	10.0732
408.203	-55.0792	10.339
410.543	-213.983	7.02819
424.46	-360.74	7.49631
-325.118	-350.527	18.07
-257.239	-291.06	11.7448
-171.897	-302.219	15.0829
-300.455	-343.732	18.07
354.886	175.726	13.4917
570.499	222.826	13.0822
387.938	95.8986	11.8376
606.829	-73.7251	14.9286
589.975	-376.453	14.4372
-172.647	29.5558	90.5341
-231.879	-207.949	88.346
94.5244	335.964	86.8535
199.042	274.341	89.3888
142.764	90.0488	81.39
212.292	93.5772	81.39
155.189	144.589	86.4728
184.596	133.262	87.6115
212.363	-28.1621	87.6299
253.097	100.274	86.393
134.042	16.6088	90.5455
218.523	149.826	88.5653
278.768	57.8654	89.2692
351.599	184.111	85.5314
340.48	204.188	87.844
346.244	254.836	90.0384
460.878	216.087	90.9491
573.458	136.648	89.8567
620.409	-39.9961	81.39
401.402	-382.401	89.7177
510.597	-396.945	90.7869
642.07	-50.6595	87.4006
657.366	-29.2965	87.3786
55.235	21.2816	92.6823
261.248	150.796	93.0647
14.1359	-58.5193	95.9755
308.356	-26.0663	95.2206
356.45	238.743	93.8843
442.57	328.565	93.0257
430.821	185.43	95.0599
341.529	62.7451	94.7174
449.952	97.6995	98.07
438.985	-321.291	98.07
-271.565	34.3581	161.39
-265.961	57.9472	161.39
1.75428	-76.3243	161.39
-229.818	-234.332	165.977
-219.141	-242.721	168.561
142.47	319.321	161.39
312.745	198.305	161.39
334.802	259.13	161.39
145.801	271.377	163.331
315.119	240.285	166.218
316.425	318.124	169.615
208.738	138.422	161.39
227.858	76.1744	161.39
328.441	43.0695	161.39
134.682	-245.156	161.39
376.444	252.554	161.39
379.47	205.693	161.39
468.172	117.053	167.89
438.665	-55.9124	169.314
594.049	-236.775	162.929
290.95	216.537	247.197
55.7387	45.2552	241.39
67.7133	110.057	241.39
263.007	55.1521	247.763
278.07	107.956	246.019
285.463	152.489	247.867
293.194	9.26631	246.936
301.606	176.568	247.377
332.487	130.641	246.113
202.459	-197.66	246.288
392.622	54.2059	246.238
470.425	16.4555	247.985
372.761	-14.1459	249.937
494.339	61.7261	249.486
616.667	-179.928	247.776
544.607	-428.645	248.425
-447.883	302.697	254.283
25.9756	41.3715	256.485
141.45	90.7867	252.857
155.285	176.998	252.401
341.473	166.954	251.803
470.925	223.845	254.251
399.296	-102.228	254.663
394.286	-293.142	252.506
-260.667	-253.636	321.39
-227.688	-275.483	321.39
-224.509	-242.942	327.689
-227.117	-221.139	330.602
225.514	191.871	321.39
240.712	245.656	321.39
204.774	281.131	324.631
138.853	148.868	321.39
175.179	132.1	321.39
196.312	173.931	321.39
234.74	155.264	321.39
250.473	104.117	321.39
263.194	66.3781	321.39
326.198	246.496	321.39
378.981	262.261	321.39
433.703	227.685	326.397
297.777	52.1941	321.39
310.309	101.144	321.39
395.441	154.937	321.39
404.694	184.784	321.39
522.38	131.585	321.39
313.251	141.2	325.219
358.274	67.8611	327.348
276.099	138.088	328.457
424.24	-132.511	321.39
550.865	-406.393	321.39
622.22	62.8934	321.39
699.716	154.285	321.39
743.442	-213.897	321.39
-185.506	-217.011	401.39
-193.495	-181.573	406.086
-157.529	-185.965	406.684
98.3947	289.403	401.39
236.613	261.055	401.39
111.938	234.506	403.133
119.614	142.753	401.39
160.979	39.095	401.39
271.381	50.9468	401.39
292.215	110.561	401.39
310.109	39.7675	401.39
153.674	68.4424	404.476
291.345	206.376	404.188
351.839	264.292	401.39
352.427	112.86	401.39
379.779	50.9057	401.39
380.942	190.135	401.39
421.354	178.43	401.39
487.729	108.809	401.39
507.178	-14.7875	401.39
487.181	26.453	404.244
454.885	-295.199	401.39
543.709	-283.764	401.39
383.317	-245.819	404.15
537.646	-427.288	401.39
681.622	-78.3241	401.39
-198.705	-141.905	481.39
234.128	321.679	481.39
290.309	296.259	481.39
94.7235	255.469	481.39
128.405	243.408	481.39
168.036	188.068	481.39
194.264	74.6645	481.39
200.336	244.23	481.39
220.024	254.951	481.39
230.932	54.1146	481.39
298.179	30.4767	481.39
298.692	87.9143	481.39
302.086	122.055	481.39
303.976	199.434	481.39
311.115	179.835	481.39
337.318	-21.0409	481.39
203.275	-124.9	481.39
303.019	-164.656	481.39
333.475	170.306	481.39
347.363	90.8783	481.39
363.533	78.4201	481.39
376.994	-2.81195	481.39
397.334	103.605	481.39
348.798	-59.3805	481.39
375.579	-198.349	481.39
443.543	-368.809	481.39
442.307	-73.448	481.39
-410	-318.134	561.39
95.2819	260.591	561.39
153.439	295.593	561.39
165.278	282.04	561.39
177.449	321.464	561.39
205.437	309.048	561.39
-15.1317	-105.428	561.39
86.0213	15.2282	561.39
97.2347	-9.58765	561.39
121.243	44.8485	561.39
150.396	115.778	561.39
205.347	183.542	561.39
209.903	48.5449	561.39
313.657	536.644	561.39
229.928	297.347	561.39
243.352	488.622	561.39
259.895	260.755	561.39
349.098	265.299	561.39
373.773	232.047	561.39
438.447	312.12	561.39
251.599	69.1888	561.39
266.118	198.011	561.39
276.986	111.7	561.39
309.393	87.2359	561.39
341.934	207.298	561.39
346.472	-8.47148	561.39
353.611	129.281	561.39
387.07	178.295	561.39
405.472	-105.287	561.39
424.538	-24.0588	561.39
426.009	113.977	561.39
501.148	138.406	561.39
284.899	-339.888	561.39
400.252	-291.957	561.39
557.669	-162.449	561.39
640.156	-230.6	561.39
-67.0991	-108.514	645.327
-97.0794	-139.846	647.284
-118.282	-163.945	649.056
-201.791	-211.469	645.929
172.656	64.8279	641.39
160.951	105.443	643.257
-5.17073	87.6099	647.701
80.4605	23.0045	651.032
136.501	47.3854	648.561
148.972	116.358	650.132
266.993	31.7319	651.058
434.573	200.037	647.518
350.848	160.411	650.337
389.902	171.621	648.979
430.782	137.712	650.191
553.266	-40.2272	641.39
506.569	65.993	648.223
394.851	-94.3785	649.651
426.356	-333.983	647.384
397.709	-377.039	649.899
607.293	-159.876	641.39
657.554	-53.6513	646.142
-356.858	-92.0391	651.471
93.0303	190.1	652.701
135.861	257.801	651.637
192.877	34.297	651.957
261.406	-28.3475	651.779
380.997	234.463	651.986
450.651	239.219	651.597
292.139	-63.507	652.371
-283.327	-5.18357	727.239
254.78	104.12	721.39
319.739	129.806	724.752
24.277	-14.9331	727.069
131.255	146.102	726.869
216.683	45.3078	726.973
286.303	19.1764	726.17
134.125	49.0623	729.552
230.488	59.7322	729.967
322.75	21.1153	728.885
455.828	189.315	727.488
380.349	64.9592	728.203
390.153	43.683	725.675
507.906	111.911	726.922
537.337	158.854	728.808
606.287	-360.959	727.043
408.464	-285.583	729.812
527.59	-330.89	730.635
-346.524	-210.458	735.129
109.06	18.6218	731.909
391.796	196.234	731.656
386.568	122.096	731.499
358.412	18.9005	12.51
307.504	-7.12412	4.17
340.866	-25.9985	15.29
359.677	56.2062	6.95
418.659	119.93	12.51
518.935	303.264	12.51
324.833	183.444	9.73001
312.934	238.121	9.73001
590.339	-52.0395	4.17
210.196	218.387	12.51
226.133	475.923	12.51
226.1	99.4378	4.17
-176.291	-253.84	6.94999
337.64	-337.49	92.51
130.805	221.254	89.73
112.085	293.604	86.95
284.098	200.075	86.95
334.776	170.544	86.95
330.898	137.262	89.73
288.54	158.654	84.17
203.343	216.266	84.17
103.324	72.1097	84.17
264.581	76.5845	92.51
299.173	65.0446	86.95
280.578	10.1424	92.51
-236.166	-165.661	89.73
-109.405	-178.947	92.51
454.151	251.982	86.95
341.824	342.814	84.17
143.201	240.675	161.39
122.063	235.783	161.39
405.102	327.971	166.95
307.142	159.623	161.39
138.498	129.973	161.39
238.095	178.539	172.51
272.038	5.44062	164.17
550.298	-14.7044	169.73
434.947	-205.229	169.73
416.808	-392.784	169.73
-137.656	-220.125	172.51
142.407	96.0162	164.17
164.417	216.797	166.95
359.353	181.571	175.29
442.412	-393.986	246.95
343.425	-40.4734	244.17
309.513	-40.2351	244.17
270.351	25.0919	249.73
219.593	78.3732	246.95
152.997	231.455	241.39
86.8314	194.769	246.95
-154.051	-124.373	329.731
-191.199	334.775	326.951
112.54	224.932	324.171
89.7379	21.2013	321.391
211.81	57.0154	321.391
202.604	77.7397	324.171
218.166	255.295	329.731
224.887	245.503	329.731
332.516	221.543	335.291
365.895	116.838	329.731
260.993	99.1352	324.171
287.096	107.283	324.171
524.03	18.506	329.731
684.643	-82.3021	329.731
374.736	-307.924	324.171
362.52	-133.632	321.391
460.923	-372.647	329.731
218.178	-32.2463	329.731
447.839	-247.017	324.171
-13.599	-67.6205	398.004
121.407	63.0823	395.224
125.988	79.755	398.004
186.613	47.6985	395.224
68.8861	280.353	396.242
107.713	237.21	400.941
310.522	78.246	398.004
351.976	-71.728	398.004
316.384	-146.318	400.784
371.259	-98.1242	395.224
318.198	-376.763	398.004
253.787	-292.227	395.224
419.301	-453.743	398.004
250.209	5.71937	395.224
410.199	-119.499	489.73
441.933	-37.5295	489.73
297.297	147.955	492.51
324.938	89.0417	489.73
393.25	169.217	495.29
407.673	163	495.29
334.493	214.336	495.29
192.309	327.821	492.51
176.995	141.531	484.17
-425.73	201.438	490.555
246.449	246.336	572.51
142.62	143.677	572.51
195.774	49.4243	578.07
-2.77853	-70.5506	569.73
-204.705	-237.091	569.73
394.972	-94.4924	568.728
246.522	-21.088	578.07
404.136	-347.574	577.154
448.642	-441.25	571.904
308.584	88.8946	578.07
284.253	317.449	570.453
316.049	258.714	649.73
159.896	233.732	649.73
125.843	89.1256	655.29
202.917	92.0975	649.73
405.661	161.779	649.73
431.781	174.386	652.51
448.906	85.7147	649.73
320.72	-93.2381	649.73
259.206	-29.7725	649.73
282.909	-7.09185	655.29
215.016	31.7882	649.73
125.769	28.5503	649.73
485.682	-411.148	653.807
109.306	200.936	732.509
129.895	180.134	724.169
215.31	118.653	729.729
117.473	140.322	732.509
240.115	100.685	729.729
296.126	179.416	729.729
294.634	46.942	724.169
301.404	14.3096	724.169
220.955	7.31887	721.389
200.221	22.8409	724.169
247.11	-46.7538	729.73
368.942	-163.539	729.73
336.802	-348.448	732.564
11.505	-117.006	726.95
673.077	-192.434	1.62
596.534	48.2198	1.62
589.331	-12.1571	1.62
568.507	55.0777	1.62
607.402	8.37072	8.8673
399.437	-254.156	1.62
389.108	-284.95	1.62
476.163	-375.15	5.28079
519.341	82.6925	1.62
489.227	59.003	1.62
518.978	-79.8482	4.74288
487.965	21.6459	3.96603
379.641	93.8607	5.92438
275.927	-85.7299	8.97987
539.95	199.112	1.62
528.943	150.806	1.62
458.52	212.061	1.62
421.469	186.655	1.62
420.201	209.668	1.62
416.963	168.681	1.62
392.046	143.042	1.62
390.14	157.992	1.62
380.285	180.857	1.62
367.643	222.312	1.62
355.677	277.373	1.62
333.822	197.089	1.62
329.037	281.642	1.62
315.063	185.508	1.62
297.515	207.702	1.62
422.353	234.856	4.13402
385.275	253.183	4.63869
461.426	253.353	8.63915
355.038	325.14	9.44481
349.473	187.424	6.80187
311.478	290.171	10.3759
214.215	74.712	1.62
205.644	67.4049	1.62
89.2889	-155.869	1.62
77.7954	44.1495	1.62
64.4515	-17.1144	1.62
55.3183	4.69651	5.41665
84.7877	16.6767	8.03149
219.098	231.471	1.62
123.961	150.063	1.62
105.243	231.882	1.62
177.628	383.144	4.44261
136.759	244.446	5.82704
186.67	182.536	7.14136
68.2675	123.492	7.35935
-142.801	-170.824	1.62
-150.234	-219.119	1.62
-240.639	-163.103	1.62
-149.182	-93.8367	3.99956
-137.349	74.0755	9.49187
-134.274	-96.4808	10.3814
578.958	-34.637	91.0445
550.936	184.289	87.548
359.811	-250.887	84.5291
448.098	72.6608	81.62
447.538	-58.1097	81.62
436.688	53.1791	81.62
411.83	-156.533	81.62
398.732	39.5317	81.62
389.431	-6.29057	81.62
382.323	32.7018	81.62
365.451	10.6307	81.62
313.055	29.401	81.62
300.597	-235.654	81.62
298.346	64.7675	89.7111
541.137	55.2687	90.4575
449.855	190.68	81.62
422.452	257.777	81.62
420.482	196.802	81.62
411.688	172.195	81.62
387.227	166.311	81.62
382.445	201.41	81.62
371.827	277.6	81.62
366.365	318.184	81.62
345.55	175.782	81.62
326.823	198.482	81.62
308.43	207.75	81.62
290.482	205.32	81.62
279.407	260.117	81.62
276.946	172.283	81.62
245.15	254.031	81.62
230.652	166.982	84.452
537.48	184.004	89.3848
479.584	132.757	88.6296
461.087	115.023	88.6295
393.976	262.307	89.5683
382.277	251.708	88.0611
359.691	248.766	88.5771
336.97	224.772	87.7751
257.086	101.97	89.939
299.572	441.979	84.655
232.963	427.662	87.341
208.812	70.8747	81.62
165.881	53.5464	81.62
109.096	41.3259	81.62
17.8692	-100.057	92.5051
218.823	136.867	81.62
201.758	92.1422	81.62
196.507	196.16	81.62
167.737	101.222	81.62
115.834	180.73	81.62
1.60957	85.3212	81.62
184.079	113.912	83.8539
156.361	241.839	83.287
209.216	382.496	87.4867
-130.943	-187.9	81.62
-192.277	-147.472	81.62
-197.109	-216.741	81.62
-292.763	-245.409	81.62
-377.065	-107.988	81.62
-362.712	102.184	87.128
593.532	-126.275	161.62
490.972	-229.375	161.62
492.863	89.4265	161.62
444.107	68.4086	161.62
380.733	78.7835	161.62
364.455	36.0952	161.62
346.986	-129.741	161.62
337.976	80.4646	161.62
318.519	102.367	161.62
233.678	-48.7337	161.62
498.423	42.6113	163.275
332.583	23.7333	164.504
495.721	135.08	161.62
470.799	108.12	161.62
443.802	308.841	161.62
421.552	157.196	161.62
410.191	106.971	161.62
377.783	215.557	161.62
376.721	202.06	161.62
361.679	129.451	161.62
336.109	248.611	161.62
307.756	208.013	161.62
302.199	149.804	161.62
417.527	128.862	163.606
368.915	177.087	165.739
360.13	211.796	164.322
325.493	254.102	164.539
253.873	248.989	164.501
205.242	17.685	161.62
183.555	65.8854	161.62
170.193	99.2373	161.62
102.107	32.719	161.62
199.088	194.154	161.62
133.188	113.665	161.62
127.521	301.353	161.62
127.307	237.518	161.62
120.89	126.35	165.147
87.0973	170.201	163.561
-152.434	-279.046	161.62
-221.668	-222.837	161.62
536.097	29.1756	240.7
610.349	-36.9948	242.762
556.491	49.6273	244.678
428.697	-291.421	251.189
529.68	-266.054	242.046
515.774	-257.675	242.009
464.839	-14.5964	237.895
445.083	-6.40083	237.911
436.663	15.1341	237.58
407.758	-36.4421	238.795
464.545	33.3648	241.655
380.638	-2.3018	244.019
450.378	-266.36	252.096
278.521	-43.4458	249.788
334.477	152.502	235.887
324.463	117.043	236.637
256.564	184.676	235.955
236.258	125.732	237.233
210.984	196.031	239.416
487.852	276.713	238.339
314.491	96.3791	243.842
253.607	137.676	244.697
273.06	71.2959	247.433
32.5033	-98.9075	243.193
162.904	-114.347	250.162
127.234	31.4319	246.382
112.715	-74.8558	250.505
58.4932	24.6064	250.642
173.311	77.7299	238.674
160.627	140.526	237.607
97.1105	220.181	236.662
204.321	109.669	241.117
175.998	106.615	241.21
8.64779	81.0137	242.797
195.035	255.636	242.024
75.5805	128.258	246.372
-157.579	-312.282	250.595
-300.209	-78.6313	252.188
-222.567	217.599	239.46
-136.337	143.809	247.228
-535.331	251.202	248.814
552.519	128.504	326.961
512.927	379.861	328.623
516.579	197.802	327.808
557.96	307.101	330.998
534.105	-318.234	325.102
410.283	78.8709	321.62
340.612	120.289	321.62
256.289	123.029	321.62
227.261	112.856	321.62
489.462	-2.579	324.314
485.942	21.8693	326.418
448.683	-22.5664	325.766
426.641	79.7049	323.717
409.683	32.3475	324.219
374.946	32.5371	324.465
355.666	49.2606	325.116
315.836	21.71	323.952
440.621	155.844	325.302
348.069	275.334	325.906
338.326	310.357	326.401
380.787	337.288	328.967
382.965	276.855	329.346
383.067	206.094	328.202
316.5	321.081	329.035
316.159	281.302	327.473
303.621	153.525	327.657
279.396	185.816	327.248
190.958	253.44	328.787
194.908	180.743	327.535
178.434	73.2084	321.62
24.389	50.2887	321.62
19.7013	95.7368	321.62
-5.93499	85.8333	321.62
-18.7378	84.9569	321.62
-51.3151	-118.727	321.62
-54.6844	-186.713	321.62
-61.7164	-120.5	321.62
-84.7601	-116.575	321.62
-103.008	-129.43	321.62
180.825	-56.1674	329.564
-3.58135	33.2823	330.207
143.586	357.696	324.807
146.783	213.543	323.734
96.4039	420.795	324.924
107.035	241.72	325.226
133.184	272.009	328.921
118.168	326.989	328.64
110.564	370.501	326.702
9.16534	194.461	327.251
158.994	284.645	330.09
-152.851	-109.247	321.62
-187.827	-46.2841	321.62
-350.303	-226.509	321.62
-161.641	-122.728	324.864
-217.634	-145.66	328.275
-241.961	-52.7883	327.441
-254.961	-214.46	327.81
-297.746	-162.698	326.52
548.613	115.505	401.62
667.344	-15.6211	407.755
567.321	335.961	409.164
568.552	161.762	407.625
373.958	-240.959	401.62
372.676	-274.228	401.62
333.214	-253.887	401.62
453.42	-241.704	405.039
381.482	-330.516	404.196
371.2	-306.807	405.025
435.263	-352.437	407.772
397.912	98.817	401.62
258.064	12.0004	401.62
247.948	65.8054	401.62
243.708	-22.0488	401.62
246.049	-123.56	401.62
532.402	62.5259	405.99
303.128	-45.1383	403.6
468.332	244.845	401.62
379.701	213.953	401.62
352.055	186.258	401.62
323.275	219.073	401.62
304.087	238.526	401.62
296.063	215.386	401.62
292.77	246.21	401.62
274.528	255.249	401.62
217.671	304.714	401.62
473.47	323.253	403.246
472.008	189.834	404.05
464.343	205.973	404.619
352.663	222.633	405.518
355.596	159.909	405.423
499.483	229.29	408.659
444.685	375.318	407.938
404.372	290.609	408.394
395.999	250.982	406.799
219.392	120.477	401.62
218.496	27.1449	401.62
185.209	-35.1128	401.62
175.514	-46.1942	401.62
158.375	-32.139	401.62
147.712	30.5847	401.62
125.061	48.4067	401.62
101.583	48.8186	401.62
80.0401	6.68512	401.62
21.6445	5.11695	401.62
-9.31319	22.7218	401.62
-37.727	11.1011	401.62
195.142	18.143	403.916
121.494	-125.642	403.287
29.1437	-40.5051	404.469
30.0396	-142.763	408.108
203.095	311.663	401.62
184.89	312.653	401.62
168.084	211.839	401.62
143.663	199.871	401.62
140.162	244.594	401.62
-22.9976	111.134	401.62
210.082	325.082	407.813
-225.568	-167.317	401.62
-235.377	-81.8831	401.62
-134.321	217.044	406.258
-396.613	-363.365	401.62
570.401	-157.893	488.422
623.611	44.8522	491.283
607.134	-68.5545	489.995
546.841	-71.8824	481.62
446.167	71.1726	481.62
427.307	67.9885	481.62
300.543	53.2924	481.62
415.725	53.8991	484.46
322.285	78.3524	485.424
492.863	121.307	481.62
459.744	203.487	481.62
460.439	143.295	481.62
414.033	113.239	481.62
389.456	186.681	481.62
378.131	141.304	481.62
372.839	114.109	481.62
342.164	154.104	481.62
312.295	94.9963	481.62
281.558	256.087	481.62
522.012	163.841	484.142
448.616	200.837	484.277
351.371	220.89	485.349
456.433	247.24	488.985
394.275	98.4834	488.137
326.791	175.602	489.22
254.126	122.954	488.878
493.486	174.846	490.658
433.057	113.968	490.17
403.16	225.692	490.408
349.488	187.034	491.693
267.422	231.413	491.672
154.12	18.7937	481.62
64.2187	-93.9409	481.62
60.5812	-3.32351	481.62
42.09	-10.5466	481.62
23.5787	-65.8069	484.458
66.0005	-61.4883	488.129
-3.76928	-4.13552	488.746
160.702	169.169	484.387
196.397	224.561	490.175
-240.678	-274.826	485.359
-165.743	-118.253	481.62
-199.323	-76.0532	481.62
-213.975	-90.6547	481.62
-185.073	-218.197	485.59
-208.188	-7.1387	485.034
-188.042	-181.537	487.421
-192.449	-99.1349	489.077
-200.256	-230.821	488.105
-136.552	299.095	481.62
-514.409	167.774	481.62
-522.639	250.521	481.62
-564.589	163.529	481.62
763.429	83.1758	571.254
364.257	-15.6273	569.544
301.272	-35.747	567.935
275.171	-47.4233	569.358
258.724	58.9512	567.746
468.405	78.9716	571.687
311.615	84.6299	570.978
286.576	55.5116	570.381
518.607	242.159	567.528
466.394	204.22	569.652
382.844	175.189	568.496
289.691	149.056	568.497
473.289	232.997	569.883
385.223	185.178	570.204
339.824	261.01	571.429
317.041	368.49	572.223
281.29	96.1985	572.245
212.919	52.5219	569.526
-22.748	-100.082	569.141
183.746	44.8086	571.448
229.952	215.341	568.013
118.836	218.927	568.673
150.059	143.763	570.317
34.4351	153.637	571.237
12.9816	140.256	571.322
-242.056	-249.147	569.958
-267.616	-50.6677	567.265
644.954	299.214	575.443
434.845	-111	573.67
422.539	19.8056	574.677
443.624	125.41	574.867
376.357	262.805	573.442
330.234	271.967	575.429
305.772	217.197	574.006
267.635	208.178	573.503
416.54	222.726	578.62
391.101	204.942	578.056
196.859	-21.2776	574.272
79.3365	-12.2024	574.111
75.435	198.236	574.375
-140.974	6.6657	577.284
-181.424	-134.831	577.612
-379.114	28.0627	577.968
-131.521	265.549	575.174
-160.239	246.269	574.565
327.86	47.0983	649.461
531.35	48.8172	651.711
515.737	-10.1208	651.35
351.913	55.898	652.542
518.429	89.7828	648.612
460.887	112.356	648.866
438.02	200.432	648.861
402.722	247.043	649.067
391.52	201.727	649.516
378.584	179.795	648.451
417.79	223.138	649.831
409.586	139.433	651.485
400.977	328.022	651.844
393.266	264.183	652.057
384.355	94.7361	651.381
363.547	200.612	650.639
344.29	218.233	651.918
316.021	169.264	651.89
174.032	-32.4517	651.473
130.223	37.4092	652.566
94.8731	51.6439	652.396
276.797	279.248	651.757
195.343	256.911	650.53
184.776	219.38	651.129
-101.375	-49.2063	648.421
-124.042	-58.8705	648.764
-153.835	-185.252	648.341
-191.047	-225.441	651.648
-258.794	-78.8314	650.299
492.314	-73.917	654.371
287.955	52.4453	654.547
527.373	175.72	654.225
450.535	262.711	654.776
323.49	198.186	655.575
298.643	231.349	655.288
-27.6812	33.5222	656.859
169.998	220.403	655.45
111.103	255.639	654.336
42.5702	157.155	655.26
-210.811	-141.398	654.367
-276.077	-225.4	655.814
629.016	-106.023	730.699
624.635	-80.2931	731.892
554.088	-61.5461	729.267
521.531	-60.5911	728.819
505.316	4.62661	729.076
308.735	31.6454	729.659
557.487	16.36	731.492
536.4	-63.1748	729.883
534.463	-137.427	729.958
423.788	-101.006	732.953
333.297	92.9632	729.476
402.577	178.702	731.446
400.239	126.263	730.059
380.393	193.025	731.377
326.527	110.63	731.433
250.875	27.8355	729.038
168.54	-30.8793	731.138
159.112	-61.8187	731.901
135.507	-55.6011	732.412
89.5471	-59.4684	730.511
80.5533	-52.6122	731.09
68.0655	-50.8964	731.303
53.0852	-23.3826	731.964
47.8752	-46.725	732.759
24.998	46.7922	729.955
115.671	130.112	729.178
234.324	92.4474	730.239
216.152	192.358	731.408
171.133	92.9554	730.41
160.905	149.178	730.011
137.168	82.2812	732.004
-394.173	227.884	728.982
-324.316	298.348	730.903
-360.445	122.711	730.425
530.899	-6.65917	733.35
513.823	29.5603	735.27
352.327	-142.925	733.636
482.224	233.872	734.148
457.73	246.427	733.326
268.059	76.8925	733.898
58.2496	16.0301	734.505
137.461	124.943	734.182
-466.474	-8.89458	734.814
