# Supplementary material for: Spinal premotor interneurons controlling antagonistic muscles are spatially intermingled
Source: eLife. 2022 Dec 13;11:e81976. doi: 10.7554/eLife.81976 (PMC9844990; doi:10.7554/eLife.81976)
Supplement: Figure 3—figure supplement 2—source data 12. [file elife-81976-fig3-figsupp2-data12.xlsx]

## Sheet: Sheet1
252.22	145.3	998
-242.59	-208.9	996
337.4	-160.71	994
357.9	60.35	992
339.03	70.86	982
458.98	-270.21	976
-133.39	-74.93	1218
-305.98	-176.28	1204
304.49	46.48	1208
269.76	124.87	1206
479.63	133.3	1232
502.45	153.64	1234
461.27	151.16	1222
217.67	71.28	1222
505.43	127.35	1228
367.28	-402.11	1234
360.05	-421.22	1234
458.72	-312.73	1222
536.22	-161.88	1216
514.52	-177.9	1204
500.57	-131.4	1202
508.32	-218.71	1206
449.43	-108.16	1196
333.04	-55.94	1474
-329.29	-199.99	990
-328.74	-34.28	988
-473.39	158.04	990
-156.93	-75.84	984
-378.06	-175.61	976
-243.39	-239.34	972
-279.96	-88.59	970
-178.54	-9.89	968
-288.28	-209.41	968
-257.24	-241	962
505.79	117.55	992
439.94	496.94	994
135.6	240.48	992
264.52	145.17	984
192.69	301.26	978
242.42	238.64	976
353.84	270.87	978
393.44	353.75	972
210.19	238.18	970
294.45	270.41	970
163.68	403.01	978
133.76	186.15	966
349.24	247.85	964
402.19	212.86	964
463.89	112.94	964
183.48	250.61	960
574.83	-153.51	984
517.81	-112.35	988
458.31	-278.46	978
401.78	87.48	972
353.68	63.18	976
553.51	-37.48	968
497.98	72.1	964
275.83	31.44	962
-367.41	-131.19	1216
-251.38	-16.42	1212
-280.06	-237.03	1202
81.95	344.34	1216
221.43	277.1	1216
335.64	311.46	1210
253.2	230.7	1210
239.88	84.93	1214
523.04	-158.57	1210
384.23	-75.58	1202
552.95	-38.58	1204
384.8	-164.97	1230
-464.61	310.46	1470
-232.01	434.01	1464
-405.47	-250.27	1470
-161.19	-110.02	1458
-346.1	-21.77	1460
-347.22	-37.67	1460
-371.7	-252.41	1456
-449.55	-5.16	1452
-417.96	-25.63	1446
-94.07	-157.88	1476
342.35	339.66	1472
314.84	148.79	1472
283.19	268.84	1462
381.32	161.7	1462
236.48	270.05	1456
239.03	144.71	1456
173.58	303.52	1450
-353.88	-255.53	1692
273.5	207.24	1712
367.95	78.33	1716
429.85	-109.29	1702
-194.47	-141.96	1954
-309.65	-365.81	1930
-215.26	-114.81	1924
170.02	392.48	1940
573.86	-31.04	1952
564.38	-54.91	1934
460.35	-212.97	1924
548.35	-124.5	1918
-104.621	-287.506	1990.27
-593.365	-21.3251	1987.49
331.632	-93.8597	1993.05
563.552	-134.388	1993.05
638.417	-58.0471	1995.83
640.18	22.6939	1995.83
374.935	86.924	1990.27
269.715	422.862	1990.27
92.6205	418.946	1990.27
44.612	246.873	1990.27
-426.863	-348.957	1910.27
-359.038	-358.923	1910.27
-418.586	-276.097	1910.27
-202.069	-114.549	1910.27
-134.289	-107.576	1910.27
-139.866	73.6507	1910.27
374.878	266.556	1910.27
412.663	121.009	1907.49
528.029	43.4118	1910.27
496.831	-327.635	1910.27
-273.59	-224.904	1833.05
-122.972	-267.933	1830.27
-213.676	-125.764	1830.27
-323.138	-146.584	1830.27
-480.702	-194.766	1830.27
-491.185	-16.3462	1833.05
-445.805	299.497	1830.27
-279.234	326.89	1830.27
288.305	174.049	1833.05
94.4116	150.188	1830.27
339.589	317.701	1830.27
317.129	114.802	1830.27
312.338	23.8204	1830.27
408.183	-105.56	1833.05
339.426	-257.398	1833.05
-198.359	-201.544	1750.27
-240.678	-252.973	1747.49
-365.038	-29.9482	1750.27
-289.46	271.084	1747.49
31.6935	183.264	1747.49
215.826	204.234	1747.49
361.74	169.265	1747.49
358.119	251.515	1753.05
493.216	-49.7859	1747.49
600.313	1.84144	1750.27
620.218	54.3692	1747.49
671.299	-132.128	1750.27
642.489	-241.233	1747.49
507.61	-330.311	1747.49
-285.864	-87.2559	1670.27
-489.105	357.575	1670.27
288.454	379.444	1670.27
390.727	282.149	1670.27
488.672	288.401	1670.27
242.707	186.23	1670.27
256.959	-24.6994	1670.27
546.792	-24.7081	1670.27
551.527	-96.2721	1670.27
509.386	-154.055	1670.27
-472.606	-53.0268	1593.05
-271.908	-232.085	1593.05
-399.197	-340.7	1593.05
331.062	-229.527	1593.05
519.725	-124.138	1593.05
567.062	-233.18	1593.05
678.282	-197.885	1595.83
529.231	90.682	1593.05
598.545	120.77	1593.05
483.881	243.699	1593.05
340.295	205.99	1593.05
279.061	170.161	1593.05
378.137	146.937	1593.05
76.5113	164.341	1593.05
464.169	290.642	1593.05
422.838	280.185	1513.05
468.76	310.38	1510.27
594.342	174.19	1513.05
627.082	91.4014	1513.05
531.65	83.851	1513.05
576.005	-232.807	1513.05
203.904	220.649	1510.27
-78.1486	190.225	1510.27
221.534	72.9302	1510.27
-122.883	-139.044	1513.05
-367.017	-308.036	1513.05
-437.856	-265.319	1513.05
-373.285	-139.273	1430.27
-135.856	-275.758	1433.05
98.3998	67.8748	1430.27
443.39	49.8819	1433.05
581.691	-12.1588	1430.27
633.269	-5.94023	1430.27
696.981	-117.702	1430.27
546.605	-129.097	1430.27
356.29	195.661	1430.27
376.303	247.901	1433.05
391.651	325.205	1430.27
467.249	277.292	1430.27
535.571	329.386	1430.27
584.16	294.681	1430.27
-162.041	-213.684	1350.27
-173.319	-260.452	1353.05
-61.7681	-241.505	1350.27
-346.115	-346.4	1350.27
-454.534	-77.4733	1350.27
437.7	5.00641	1350.27
391.766	55.6772	1347.49
337.023	135.449	1350.27
328.744	225.742	1350.27
459.835	318.487	1353.05
534.478	358.159	1350.27
639.212	-248.389	1353.05
-338.47	-141.426	1278.61
-321.211	-6.11544	1273.05
-372.581	-59.9806	1267.49
-235.807	-137.383	1273.05
-163.912	-208.545	1264.71
-132.363	-172.007	1264.71
-163.292	-105.316	1267.49
-14.7025	-43.1569	1273.05
-111.928	32.545	1273.05
-486.846	222.847	1273.05
45.9358	187.36	1270.27
442.642	-55.3007	1267.49
183.656	75.5908	1273.05
253.613	128.083	1270.27
125.498	184.453	1270.27
213.886	293.474	1264.71
341.382	220.974	1264.71
359.791	226.635	1267.49
346.231	181.902	1267.49
354.63	120.214	1267.49
534.366	96.1625	1273.05
667.222	17.2607	1267.49
602.696	-202.345	1270.27
510.345	-257.944	1264.71
450.288	-327.207	1273.05
388.74	246.743	1193.05
435.346	362.869	1190.27
613.034	122.898	1184.71
651.565	58.5283	1193.05
726.107	-257.454	1190.27
454.166	-294.366	1190.27
-298.407	-175.549	1195.83
243.452	185.862	1193.05
-88.5037	6.45865	1104.71
73.8814	13.9365	1107.49
-148.747	-208.433	1113.05
-246.784	-218.907	1115.83
-328.219	-108.149	1107.49
-449.92	-250.708	1115.83
116.942	225.955	1115.83
176.508	144.595	1104.71
309.421	135.486	1104.71
382.452	138.357	1110.27
413.698	158.35	1113.05
434.355	162.59	1104.71
473.506	38.7998	1113.05
530.723	21.8081	1104.71
557.601	-13.9613	1107.49
461.741	-99.1085	1107.49
600.323	-334.526	1115.83
634.635	-284.227	1110.27
476.715	230.306	1113.05
533.561	293.014	1110.27
-289.557	-14.5924	1038.61
-11.1781	-49.7885	1035.83
-163.242	163.765	1035.83
-152.2	-222.668	1035.83
-161.246	-302.382	1033.05
246.546	-181.271	1038.61
571.809	-171.309	1035.83
611.566	-273.481	1038.61
417.648	-274.198	1033.05
811.722	140.447	1035.83
507.036	124.826	1033.05
614.263	83.4166	1035.83
626.532	177.017	1030.27
699.419	242.131	1035.83
523.198	276.8	1038.61
487.462	325.946	1038.61
478.267	231.27	1035.83
419.713	132.968	1035.83
151.192	205.682	1033.05
354.838	418.816	1033.05
622.768	390.414	1038.61
618.106	-7.70564	1033.05
580.291	19.0242	1033.05
-205.575	-272.684	958.61
-169.391	-205.581	955.83
-152.179	-185.746	958.61
-415.325	138.867	958.61
-350.565	38.128	958.61
-574.145	-248.084	955.83
319.45	37.2186	955.83
353.989	89.1139	958.61
333.05	139.963	953.05
462.185	142.932	953.05
472.044	184.453	958.61
567.415	190.925	958.61
565.569	170.894	955.83
696.815	97.0497	958.61
282.2	129.85	953.05
197.962	261.723	958.61
375.629	222.428	953.05
387.174	282.23	953.05
424.194	292.519	953.05
445.255	250.891	958.61
499.985	322.441	958.61
166.746	-8.4191	958.61
460.423	-348.792	958.61
756.017	-192.688	958.61
819.233	-173.581	955.83
952.554	-86.1221	955.83
811.011	-217.982	958.61
287.163	-197.555	955.83
-265.839	-303.269	875.83
-287.276	-245.445	870.27
-353.81	-165.066	875.83
-165.15	-249.598	873.05
-139.837	-202.441	878.61
-59.6778	45.5206	870.27
-10.0341	58.0189	870.27
110.437	99.7551	878.61
136.392	49.8621	878.61
196.123	82.7219	870.27
379.509	126.82	878.61
357.426	148.771	875.83
395.475	168.648	873.05
433.949	158.05	875.83
392.869	211.861	878.61
376.807	262.459	878.61
580.264	202.748	873.05
507.154	184.423	873.05
597.831	134.194	875.83
584.721	333.788	875.83
557.063	339.747	878.61
501.7	313.861	875.83
503.574	0.450414	875.83
563.751	-44.7239	875.83
559.033	-286.141	878.61
855.932	-301.853	875.83
958.092	4.13568	875.83
403.093	145.153	873.05
371.787	193.539	815.29
329.73	200.565	815.29
327.992	177.039	812.51
207.742	172.135	812.51
333.468	124.535	812.51
365.711	41.3422	812.51
515.648	-12.7705	818.07
493.268	-115.147	815.29
466.019	-140.249	812.51
390.648	-190.359	815.29
424.385	-219.115	812.51
313.027	4.33897	815.29
129.166	45.4049	812.51
70.7233	9.2537	812.51
-236.633	-140.416	812.51
-232.565	-77.6854	812.51
-297.292	-140.266	812.51
-176.607	-140.032	812.51
316.444	129.392	892.51
405.982	155.528	889.73
416.319	99.554	892.51
430.79	76.0864	895.29
399.223	81.2384	892.51
402.787	60.668	892.51
426.525	6.23865	892.51
508.22	-36.3128	892.51
536.635	25.144	892.51
405.602	-100.752	892.51
409.096	-157.946	892.51
362.781	43.2589	895.29
268.622	47.5537	892.51
209.425	103.139	892.51
169.379	165.747	889.73
417.338	-354.95	892.51
-251.157	-252.326	895.29
448	68.5061	972.51
403.487	-49.6402	972.51
547.689	-36.0332	975.29
576.71	-102.642	972.51
-252.763	-224.53	972.51
243.694	74.6908	972.51
137.629	131.895	969.73
162.242	270.463	969.73
516.558	171.17	972.51
399.86	190.895	969.73
397.322	156.272	972.51
385.777	135.286	972.51
381.162	103.969	972.51
314.16	108.633	972.51
377.722	8.91858	969.73
118.65	64.8702	972.51
592.536	-140.045	975.29
504.991	340.081	1052.51
366.15	327.352	1052.51
385.688	212.876	1052.51
405.888	207.569	1052.51
424.469	211.684	1055.29
422.421	115.136	1052.51
479.115	78.4731	1052.51
294.626	68.3442	1052.51
172.459	217.881	1049.73
121.028	223.933	1049.73
171.207	101.978	1052.51
458.577	48.5063	1052.51
508.932	14.6633	1055.29
456.683	-48.4911	1055.29
375.409	-74.0735	1055.29
409.144	-79.2958	1055.29
609.337	-25.4837	1055.29
687.199	-108.686	1055.29
365.257	-163.923	1055.29
89.066	39.7115	1052.51
52.4876	14.1379	1052.51
480.258	147.398	1135.29
482.851	86.6342	1135.29
447.729	141.043	1135.29
524.025	204.088	1132.51
386.418	180.246	1132.51
339.59	148.375	1132.51
309.735	174.199	1132.51
339.03	220.079	1132.51
357.865	255.225	1135.29
248.08	122.332	1135.29
181.216	81.6832	1132.51
109.54	57.9462	1132.51
457.371	-127.063	1132.51
-126.664	-14.8147	1132.51
547.202	143.033	1209.73
450.953	228.697	1212.51
360.361	177.384	1212.51
317.977	228.22	1212.51
400.298	97.1739	1212.51
467.908	55.9709	1209.73
523.44	44.9688	1212.51
652.486	-70.5723	1209.73
501.673	-320.092	1209.73
448.772	-298.345	1209.73
277.886	38.8796	1212.51
216.977	38.6032	1215.29
597.894	-165.868	1209.73
771.691	-61.5968	1286.95
751.94	-161.483	1289.73
512.769	74.4561	1289.73
371.852	-63.6482	1289.73
250.77	50.6752	1292.51
336.435	194.634	1289.73
407.824	224.33	1289.73
404.06	278.96	1289.73
377.935	302.928	1292.51
118.962	27.879	1292.51
-347.584	266.154	810.248
-438.279	-165.001	810.454
159.217	150.892	801.39
213.343	138.621	801.39
213.238	44.7461	801.39
277.579	20.5857	801.39
152.489	103.534	806.469
321.391	176.956	808.269
333.82	-121.858	808.706
382.582	187.562	806.283
407.874	271.269	807.789
455.988	201.331	806.221
366.921	133.065	801.39
460.248	18.6864	801.39
358.687	83.3807	804.275
398.599	-97.9024	807.398
419.737	157.414	805.967
462.788	120.653	805.756
445.371	-162.605	807.951
-196.052	-187.319	881.39
-136.01	-209.944	887.336
299.215	217.538	881.39
353.795	178.266	881.39
392.448	257.849	881.39
373.15	364.229	886.806
382.651	213.366	887.536
201.609	142.946	881.39
194.459	-35.8457	881.39
344.249	99.0869	881.39
364.911	74.5131	881.39
365.667	-6.87036	881.39
292.133	51.4453	885.881
262.572	137.048	889.093
328.396	-282.492	881.39
390.299	149.908	881.39
397.972	196.067	881.39
422.856	-31.6715	881.39
439.319	-114.807	881.39
401.111	73.2791	887.346
485.97	51.8537	889.711
456.832	-407.251	884.068
552.698	-469.58	882.891
-47.1993	-27.318	893.026
-227.914	-287.332	969.335
162.887	221.777	961.39
116.621	33.03	961.39
206.488	32.216	964.871
216.392	-301.303	963.717
326.45	163.551	965.855
365.562	338.63	967.978
343.501	248.963	970.852
540.673	172.534	969.57
339.562	132.051	961.39
473.416	131.593	961.39
312.507	69.6539	964.477
376.722	132.918	963.15
396.236	104.898	967.279
559.857	118.416	967.651
267.617	93.0354	968.989
388.898	-233.091	961.39
411.286	-294.098	963.65
-437.42	-378.381	971.476
309.05	197.453	973.068
483.121	243.283	972.404
90.6732	212.053	1041.39
121.978	184.374	1041.39
141.049	240.038	1041.39
195.828	268.371	1043.25
154.451	155.868	1041.39
168.537	15.2941	1041.39
216.508	22.4299	1047.84
-10.5308	68.4964	1049.37
347.285	211.784	1048.16
452.187	169.163	1047.01
324.328	230.135	1049.32
410.841	202.075	1049.97
318.468	118.009	1041.39
332.006	74.2562	1041.39
375.508	156.089	1041.39
430.711	95.9616	1041.39
440.318	12.091	1041.39
484.445	63.384	1041.39
588.278	51.2095	1041.39
411.379	-30.7758	1043.13
457.654	149.207	1046.77
306.213	-50.3416	1049.9
358.771	126.664	1049.55
463.005	-209.157	1041.39
623.474	-400.347	1041.39
658.966	-403.996	1041.39
-315.669	-135.571	1127.7
158.986	145.002	1121.39
169.398	224.796	1121.39
203.525	189.174	1128.58
326.276	249.005	1129.06
28.283	-89.602	1121.39
64.8538	-40.8443	1121.39
111.708	-54.5739	1121.39
156.913	0.463042	1121.39
223.904	74.7916	1121.39
272.846	-2.75777	1121.39
73.3178	-4.97532	1125.52
111.222	-21.6643	1127.64
276.671	-46.741	1127.81
335.589	153.245	1121.39
371.795	148.032	1121.39
401.107	190.307	1121.39
364.806	186.545	1126.79
364.664	-130.845	1121.39
492.042	-21.8001	1121.39
602.406	-177.616	1121.39
386.542	-318.213	1121.39
432.128	-324.843	1121.39
-321.361	-188.902	1201.39
143.104	245.016	1203.06
307.105	239.188	1204.84
298.202	272.794	1209.9
170.346	5.0459	1201.39
521.512	-62.3402	1201.39
352.241	179.181	1204.64
585.479	-34.6509	1204.34
391.28	-99.695	1208.28
543.153	-54.2507	1207.08
380.19	125.983	1210.33
461.132	186.279	1209.9
482.87	176.377	1210.41
461.728	-288.436	1209.91
370.284	-54.6118	1212.52
356.783	94.7631	1215.34
478.293	120.167	1218.07
487.028	-47.584	1218.07
662.166	-237.086	1218.07
-118.902	-71.3429	1281.39
155.634	160.727	1281.39
181.03	271.127	1281.39
311.751	178.22	1287.31
327.553	274.181	1286.22
332.848	158.847	1288.11
360.737	324.02	1289.65
22.7227	-73.0561	1281.39
223.87	132.678	1285.3
176.509	119.316	1290.36
410.95	17.3736	1283.74
357.07	117.819	1286.37
400.339	72.147	1288.29
376.604	-143.192	1290.42
658.103	-189.851	1288.11
235.771	-81.836	1293.07
367.937	225.507	1291.7
383.4	212.161	1291.38
-117.614	-152.219	1369.98
179.725	186.989	1361.39
275.828	204.022	1361.39
334.455	186.466	1364.47
357.485	174.714	1368.09
337.508	138.787	1365.54
402.757	70.2367	1369.07
281.648	316.889	1376.33
337.553	216.387	1378.07
202.925	111.821	1373.35
331.3	-52.0304	1371.72
335.619	55.7457	1378.07
360.956	144.983	1378.07
412.359	6.32694	1373.27
464.921	63.057	1371.99
-87.0603	-66.1399	1450.27
148.148	220.556	1443.74
239.133	161.905	1446.02
323.806	206.315	1450.31
215.022	112.429	1442.87
79.4896	14.104	1446.05
422.096	182.839	1447.32
339.886	226.232	1449.98
415.607	208.682	1449.03
589.893	-100.161	1449.76
-330.176	-245.848	1452.3
351.489	269.103	1451.91
516.139	-41.6373	1451.88
405.376	118.687	1455.63
460.504	-234.074	1454.92
-322.76	-360.085	1526.21
244.622	179.533	1526.65
171.076	264.498	1530.39
265.74	175.413	1529.39
141.632	-16.9598	1521.39
220.168	-55.3972	1527.27
241.761	8.97138	1526.84
66.373	51.6829	1531.01
200.502	76.5388	1530.19
373.681	200.353	1529.85
355.852	149.982	1523.7
430.636	15.6575	1526.66
117.015	-10.8312	1532.87
189.53	-5.69647	1532.53
310.201	-120.287	1533.09
289.064	89.2519	1534.64
389.924	312.644	1531.16
462.928	-36.8782	1531.3
575.213	-4.1671	1531.86
-211.726	-119.694	1606.23
-208.831	-181.479	1605.69
165.202	304.366	1608.42
130.974	4.99407	1601.39
180.296	7.56439	1601.39
181.53	43.4474	1601.39
231.826	-63.0359	1601.39
248.785	-30.4107	1601.39
261.011	-67.8665	1601.39
292.105	-57.1961	1601.39
299.044	-18.1728	1601.39
318.98	36.8944	1601.39
327.221	-44.5578	1605.44
209.467	-5.74485	1605.78
141.845	-38.7021	1609.12
343.965	165.19	1610.17
327.378	-102.57	1608.04
499.91	81.6826	1601.39
585.654	-59.7164	1601.39
478.589	-3.6872	1604.65
512.38	17.1057	1603.35
392.882	176.191	1605.97
432.677	219.028	1607.29
394.387	29.4217	1611.06
473.646	-331.678	1606.83
756.304	-226.821	1609.62
446.153	191.089	1612.1
-287.692	-244.984	1681.39
26.4027	-27.291	1684.66
54.1423	-47.0326	1681.39
177.422	176.231	1681.39
214.6	192.644	1681.39
338	130.489	1681.39
222.432	173.455	1686.21
299.309	172.51	1690.36
513.086	42.9969	1689.15
598.095	-115.921	1683.77
275.042	0.130703	1693.09
357.672	-19.9259	1695.15
399.121	173.313	1691.47
-275.444	-180.437	1761.39
-229.063	-163.347	1761.39
244.546	206.984	1761.39
271.868	210.39	1761.39
284.27	66.1684	1761.39
285.117	167.61	1761.39
292.675	103.345	1761.39
351.688	25.1749	1761.39
516.273	-32.5018	1761.39
538.828	-290.398	1761.39
654.438	-213.233	1761.39
655.624	-163.75	1761.39
-365.072	195.239	1841.39
-321.671	-248.838	1841.39
-300.182	-225.249	1841.39
-159.793	-181.532	1841.39
-105.941	-272.385	1841.39
322.442	339.458	1847.96
316.402	237.953	1841.39
335.553	167.982	1841.39
333.414	240.123	1841.39
213.826	-2.29626	1843.57
359.653	188.249	1846.26
110.304	-176.395	1841.39
143.56	-211.098	1841.39
343.984	-160.69	1841.39
427.876	100.78	1841.39
435.774	46.2491	1841.39
473.072	27.8625	1841.39
581.322	-100.657	1843.9
611.121	-195.956	1847.52
445.319	-399.386	1846.23
-154.466	-245.716	1921.39
296.362	286.152	1929.65
86.0367	39.508	1921.39
94.5815	26.525	1921.39
116.244	56.6554	1921.39
126.351	203.841	1921.39
141.323	172.253	1921.39
260.937	-47.1824	1921.39
267.283	15.8716	1921.39
326.99	167.302	1921.39
184.808	165.059	1925.46
144.007	-154.755	1923.04
434.673	19.9944	1921.39
469.532	-34.1278	1921.39
467.965	57.1657	1923.14
422.858	50.7711	1929.41
537.11	-60.979	1929.48
501.184	-272.949	1926.69
685.021	-187.827	1923.75
110.962	145.496	804.17
178.895	152.645	804.17
382.928	191.292	804.17
431.85	140.766	809.73
324.354	26.1725	809.73
268.331	11.8893	812.51
323.616	75.6417	812.51
452.695	-16.1633	806.95
321.199	-117.873	804.17
424.052	-446.243	812.136
506.95	-493.782	809.784
283.52	116.427	815.29
146.41	24.7578	815.29
380.773	332.018	809.73
624.577	-117.105	889.98
637.863	-428.058	892.884
352.64	-47.9619	886.95
362.792	70.2424	881.39
352.314	195.847	889.73
130.999	114.03	881.39
326.004	15.621	892.51
122.436	178.182	881.39
245.415	-40.3204	966.95
373.671	-340.877	969.009
369.957	133.141	961.39
336.283	183.891	961.39
287.065	48.1879	969.73
177.765	28.6952	966.95
178.935	126.896	964.17
174.342	66.2272	969.73
-111.736	-127.5	972.396
-132.425	-47.3185	1048.28
95.6297	45.5072	1044.17
235.824	72.9273	1044.17
292.813	4.89798	1046.95
320.225	8.18125	1044.17
171.034	184.454	1046.95
252.994	337.72	1044.17
363.477	254.82	1049.73
363.735	204.079	1046.95
447.022	79.4372	1049.73
-156.978	-201.918	1132.51
-204.646	-239.004	1132.93
194.037	15.3578	1124.17
245.106	-23.8723	1126.95
176.835	152.894	1124.17
-173.783	-156.1	1204.17
85.5598	-20.389	1212.51
331.547	-313.318	1215.29
395.546	-349.304	1209.73
414.462	23.6994	1212.51
294.808	139.239	1209.73
223.31	159.587	1201.39
193.925	152.616	1209.73
148.97	286.678	1206.95
111.916	141.377	1209.73
149.392	143.743	1204.17
611.4	-372.821	1288.21
241.861	171.645	1284.17
59.4431	278.155	1286.95
134.887	229.306	1281.39
263.488	131.262	1284.17
248.467	110.856	1289.73
467.246	120.855	1284.75
254.938	22.6182	1286.95
507.94	14.1837	1365.45
356.037	-34.1968	1366.95
323.132	-327.579	1361.39
303.738	175.496	1361.39
334.492	163.447	1361.39
408.015	111.041	1366.95
271.025	12.1343	1361.39
237.177	33.3747	1361.39
333.595	87.1392	1446.4
424.354	114.924	1450.55
339.791	189.252	1441.84
263.238	187.64	1449.11
210.076	175.845	1453.18
431.228	-183.996	1451.17
365.379	-301.513	1452.08
275.916	168.611	1529.73
348.801	207.839	1526.95
486.175	0.263069	1529.73
408.825	-326.714	1526.95
682.981	-310.997	1532.51
255.352	89.3612	1604.17
182.508	47.0762	1601.39
161.057	76.6145	1606.95
188.961	-34.3136	1604.17
273.737	-95.841	1601.39
311.181	-153.047	1604.17
315.683	125.282	1689.73
461.892	-39.2895	1690.05
132.246	236.927	1686.95
353.676	394.998	1696.59
278.874	350.093	1695.29
216.371	-80.3724	1772.51
222.922	93.636	1762.04
255.53	189.851	1768.36
389.808	203.878	1846.3
237.602	-53.8268	1844.17
-212.921	-232.863	1843.24
372.313	24.8928	807.296
358.624	-105.614	809.195
343.503	-100.244	807.901
283.567	-106.272	806.933
271.21	-115.041	806.963
286.108	228.74	801.62
298.271	216.316	804.985
267.351	161.218	804.348
223.576	211.115	804.97
215.44	279.35	805.094
386.972	295.719	810.11
145.185	-1.78379	801.62
175.485	-16.765	806.072
98.1398	41.6285	806.324
211.453	-35.4461	806.529
185.919	-24.8075	807.994
86.1699	19.8513	808.633
70.9371	-82.0385	807.716
62.3088	8.30254	807.976
46.5072	-66.7734	808.832
49.2014	30.5445	810.583
200.534	136.069	804.226
163.578	216.396	808.39
122.171	271.128	806.778
116.395	289.625	806.774
115.589	139.786	808.903
-404.428	-35.0796	803.51
-134.595	-98.3403	807.212
-283.79	246.533	805.337
-275.045	262.077	807.338
342.652	-41.7484	881.519
550.751	-30.3228	884.965
535.191	-35.3984	885.325
388.794	-92.537	887.39
285.534	16.7497	887.444
380.587	-15.7453	890.959
499.128	73.9369	881.157
381.278	258.006	880.794
371.293	179.561	880.983
361.637	190.288	880.964
347.779	188.912	880.975
328.591	222.488	880.907
285.195	193.609	881
284.968	282.375	880.792
271.411	215.381	880.957
533.178	112.843	885.161
405.261	163.506	883.704
308.314	184.47	885.22
427.316	227.496	887.131
369.03	240.294	887.679
343.786	226.906	887.875
322.601	164.699	886.344
406.473	220.435	892.05
224.139	59.8259	881.35
210.639	61.4722	883.61
171.479	-0.869256	884.606
150.903	6.48862	883.242
135.825	0.510183	885.64
114.751	22.5493	885.671
272.712	-173.336	888.049
259.988	22.8971	888.677
180.715	11.6518	886.916
128.991	43.0626	887.244
120.653	0.585999	887.854
75.1718	43.121	886.675
58.5726	45.4736	890.724
53.5451	53.2413	890.939
134.397	290.986	886.495
11.1511	70.1287	887.949
-105.81	-102.822	892.988
-190.069	47.7644	890.482
-207.841	-68.1697	892.367
-230.654	-234.117	890.556
-217.042	124.677	883.49
-243.447	118.257	885.862
-173.195	138.593	886.725
-183.91	119.839	886.852
-193.844	147.778	888.326
-229.027	110.365	887.123
-284.482	193.104	886.855
403.882	-80.4975	893.921
134.403	62.3799	897.596
105.168	-74.695	897.934
405.529	-245.448	961.62
588.995	-82.566	961.62
574.019	-65.1182	961.62
475.987	52.6093	961.62
455.013	-7.67922	961.62
346.896	-122.774	966.251
611.044	233.478	961.62
498.887	170.682	961.62
458.436	162.768	961.62
425.122	124.067	961.62
410.963	122.29	961.62
385.609	151.229	961.62
330.584	321.897	961.62
334.413	204.465	965.783
291.93	-5.41391	961.62
260.545	21.1179	961.62
225.471	20.3973	961.62
216.245	10.8899	961.62
208.422	18.7159	961.62
198.518	-26.5167	961.62
185.135	-70.2761	961.62
116.109	-117.074	961.62
94.0237	45.166	961.62
94.6343	-116.869	961.62
58.1534	-30.9882	961.62
133.158	-152.368	965.254
35.2346	-4.5876	964.679
180.886	7.753	970.462
257.169	232.638	961.62
248.944	180.222	961.62
198.101	167.97	961.62
184.961	248.442	961.62
140.333	238.296	961.62
168.901	276.703	966.197
-40.0157	-148.686	961.62
-194.237	-124.32	961.62
-204.084	-182.01	961.62
-168.365	-84.5294	970.815
641.434	-103.005	1051.89
435.45	-292.777	1046.08
556.512	-83.7348	1041.62
487.312	31.3003	1041.62
430.513	-9.24972	1041.62
418.787	63.4008	1041.62
423.199	-23.6312	1041.62
429.737	-168.356	1041.62
386.661	29.3932	1041.62
371.038	24.9914	1041.62
352.061	54.6772	1041.62
350.903	-20.1858	1041.62
345.953	-66.7834	1041.62
326.263	-29.0843	1041.62
328.893	-79.7916	1041.62
289.652	45.1535	1041.62
549.838	60.3457	1046
406.75	80.8344	1043.61
438.224	141.316	1041.62
421.57	122.796	1041.62
379.373	209.316	1041.62
305.524	297.93	1041.62
290.663	158.59	1041.62
270.329	158.3	1041.62
522.854	139.462	1043.71
495.45	207.786	1051.97
264.698	43.5961	1041.62
113.763	55.5868	1041.62
104.942	-169.649	1041.62
89.7306	54.2101	1041.62
94.1324	-64.2699	1041.62
29.4975	-78.9061	1041.62
152.377	121.303	1041.62
178.04	230.635	1044.94
129.029	271.748	1045.21
124.458	159.029	1044.69
106.682	265.235	1051.12
-142.842	-145.21	1041.62
-351.282	26.2184	1041.62
294.417	-5.0204	1053.82
-425.751	188.597	1054.52
504.097	-280.877	1121.62
474.055	-289.457	1126.46
430.468	-279.646	1125.24
406.009	-284.039	1126.23
545.527	100.146	1121.62
508.492	63.8378	1121.62
459.003	46.7203	1121.62
446.389	-14.0594	1121.62
325.891	57.0201	1126.31
425.49	33.4955	1127.07
490.375	242.294	1121.62
304.278	324.862	1121.62
292.198	277.896	1121.62
385.801	218.658	1127.15
280.9	324.229	1127.95
315.566	432.996	1130.94
267.998	-54.857	1121.62
253.102	-33.443	1121.62
104.766	60.7292	1128.62
143.374	43.5591	1130.25
273.323	249.773	1121.62
204.32	144.964	1121.62
194.466	136.016	1121.62
149.309	257.992	1121.62
138.133	251.035	1121.62
95.8558	333.655	1127.03
136.258	382.787	1130.61
194.986	496.996	1121.62
232.27	443.965	1125.13
246.876	431.048	1131.91
-159.438	-201.309	1121.62
-271.149	-127.971	1125.53
-117.137	-193.46	1128.86
-177.627	-49.3493	1128.68
-341.828	-282.156	1130.23
-387.344	235.248	1121.62
418.946	-234.677	1201.62
459.452	70.4419	1201.62
417.093	41.7724	1201.62
330.056	-110.366	1201.62
312.312	-13.0466	1201.62
285.413	-26.3064	1201.62
576.488	139.839	1201.62
506.696	95.0009	1201.62
436.899	92.608	1201.62
369.12	151.154	1201.62
364.684	193.39	1201.62
356.22	217.415	1201.62
353.633	244.391	1201.62
311.582	221.855	1201.62
295.965	159.312	1201.62
280.318	126.828	1201.62
269.777	147.832	1201.62
513.767	121.793	1204.26
213.667	-17.8532	1201.62
200.626	-24.3442	1201.62
84.0808	24.3974	1201.62
48.3335	46.5875	1201.62
80.6938	71.0157	1207.5
37.5977	-60.4693	1210.72
121.861	184.058	1201.62
152.146	124.054	1205.78
135.017	359.769	1208.61
-63.3851	-110.922	1211.4
-362.844	223.961	1201.62
-330.929	270.62	1209.43
-379.2	-253.304	1201.62
589.577	-32.1033	1281.62
516.175	-36.8616	1281.62
433.416	45.5549	1281.62
425.821	-196.016	1281.62
554.39	85.7785	1285.76
540.524	50.3791	1283.48
374.874	95.6663	1286.43
481.912	134.761	1281.62
352.898	155.72	1281.62
325.346	180.304	1281.62
323.284	157.569	1281.62
283.577	167.699	1281.62
255.217	157.586	1283.91
253.092	121.101	1284.26
186.883	142.191	1281.62
138.783	87.2363	1281.62
118.813	205.79	1281.62
174.559	100.408	1286.15
200.883	141.804	1288.75
-255.279	-137.553	1281.62
-226.218	-159.106	1285.56
-362.48	34.6206	1285.51
627.653	-93.3239	1361.62
587.908	-14.1255	1363.29
501.01	36.6239	1365.1
431.663	66.8961	1366.12
388.833	63.4298	1366.04
376.979	-137.981	1365.81
419.531	-145.628	1366.49
555.924	101.522	1361.62
545.315	133.394	1361.62
514.043	147.408	1361.62
418.205	184.21	1365.97
413.886	213.058	1365.17
353.74	82.3609	1365.6
490.758	280.555	1367.99
466.584	317.107	1369.06
315.369	143.655	1369.94
259.463	-14.205	1368.83
87.6083	32.746	1369.61
74.125	30.83	1369.41
224.956	197.993	1365.95
210.946	140.067	1369.12
162.548	170.38	1367.52
163.322	294.783	1370.38
148.173	189.593	1371.9
-249.896	-262.589	1369.63
-268.821	-251.254	1370.59
-290.335	-180.936	1372.22
