# Supplementary material for: Spinal premotor interneurons controlling antagonistic muscles are spatially intermingled
Source: eLife. 2022 Dec 13;11:e81976. doi: 10.7554/eLife.81976 (PMC9844990; doi:10.7554/eLife.81976)
Supplement: Figure 3—source data 1. [file elife-81976-fig3-data1.xlsx]

## Sheet: Sheet1
1	0.977081	0.964754	0.948918	0.89984	0.927805	0.958732	0.905063	0.903106	0.884516	0.941286	0.971573	0.971023	0.889512	0.969951	0.959259	0.920007	0.929152
0.0599681	1	0.964946	0.955442	0.909552	0.937609	0.959146	0.910324	0.904477	0.892817	0.951121	0.973318	0.974207	0.895506	0.972018	0.949464	0.905733	0.935738
0.0781566	0.0206147	1	0.971233	0.887743	0.91508	0.974002	0.913214	0.907835	0.921055	0.962823	0.981449	0.98035	0.90421	0.951416	0.938523	0.900385	0.924316
0.117706	0.0552165	0.0343134	1	0.869867	0.886827	0.942485	0.905859	0.901968	0.893431	0.954502	0.958547	0.949537	0.873884	0.935709	0.93316	0.910794	0.903481
0.17411	0.220397	0.242252	0.273709	1	0.937188	0.92547	0.887785	0.835416	0.913647	0.894001	0.892619	0.922001	0.931754	0.93818	0.899441	0.80701	0.949335
0.0726821	0.124008	0.139192	0.179188	0.110284	1	0.945124	0.861954	0.804211	0.883801	0.905845	0.916563	0.955035	0.904375	0.944774	0.894611	0.790445	0.940756
0.00222158	0.0571605	0.0774287	0.111878	0.165568	0.0608089	1	0.911519	0.882575	0.930464	0.930192	0.963885	0.982602	0.913227	0.951951	0.948089	0.861253	0.955316
0.341457	0.270315	0.247276	0.213604	0.485418	0.399866	0.326099	1	0.959796	0.951834	0.895451	0.940698	0.897235	0.88549	0.930986	0.957906	0.91842	0.940548
0.503763	0.415852	0.378673	0.351942	0.623848	0.570876	0.465824	0.125865	1	0.905521	0.877701	0.935427	0.876762	0.832823	0.907768	0.948613	0.954584	0.894287
0.265357	0.205607	0.184889	0.150616	0.425939	0.324306	0.262112	0.0604857	0.18288	1	0.892459	0.925876	0.912254	0.915699	0.910826	0.919412	0.857677	0.961429
0.110436	0.162711	0.182926	0.217251	0.0626292	0.0478624	0.105654	0.430503	0.562155	0.367501	1	0.951926	0.955848	0.925836	0.952753	0.900143	0.859881	0.891086
0.148128	0.0829101	0.0594934	0.0245909	0.30813	0.21386	0.140691	0.19673	0.337039	0.129618	0.245863	1	0.973161	0.901418	0.960961	0.960307	0.924886	0.93707
0.0450483	0.102423	0.120332	0.160174	0.135919	0.0236909	0.0399013	0.384616	0.535965	0.308365	0.070393	0.189852	1	0.908713	0.959707	0.939415	0.867196	0.941477
0.225537	0.26844	0.295126	0.320289	0.0599643	0.163705	0.219047	0.525889	0.654215	0.478144	0.123145	0.35617	0.193467	1	0.936191	0.873859	0.785507	0.904034
0.0268332	0.0818161	0.101753	0.137297	0.145309	0.0370998	0.0235367	0.35374	0.492435	0.287447	0.0832069	0.165873	0.0153328	0.201768	1	0.954034	0.897774	0.950498
0.274593	0.203427	0.17396	0.141478	0.430257	0.343201	0.260076	0.0878942	0.225891	0.0217788	0.362296	0.118297	0.313985	0.475919	0.285016	1	0.948349	0.955918
0.523814	0.420187	0.366743	0.347834	0.619203	0.610864	0.461587	0.108819	0.0232258	0.164814	0.549999	0.329756	0.536611	0.643894	0.485124	0.212029	1	0.874757
0.161845	0.101206	0.0785828	0.0433984	0.331624	0.225608	0.159801	0.17784	0.308741	0.112465	0.266663	0.0191198	0.204353	0.387821	0.184547	0.0954926	0.292252	1
