# Supplementary material for: Spinal premotor interneurons controlling antagonistic muscles are spatially intermingled
Source: eLife. 2022 Dec 13;11:e81976. doi: 10.7554/eLife.81976 (PMC9844990; doi:10.7554/eLife.81976)
Supplement: Figure 3—source data 2. — For each section the data are scaled to the reference points indicated in the methods in order to account for size differences along the segments. [file elife-81976-fig3-data2.xlsx]

## Sheet: Sheet1
LG	TA
328.81	312.44
330.31	345.67
322.43	363.1
316.04	342.75
350.7	297.58
365.09	276.38
330.75	314.8
285.45
267
294.1
352.39
