# Supplementary material for: Spinal premotor interneurons controlling antagonistic muscles are spatially intermingled
Source: eLife. 2022 Dec 13;11:e81976. doi: 10.7554/eLife.81976 (PMC9844990; doi:10.7554/eLife.81976)
Supplement: Figure 4—figure supplement 2—source data 1. [file elife-81976-fig4-figsupp2-data1.xlsx]

## Sheet: Sheet1
1	0.977081	0.964754	0.948918	0.89984	0.927805	0.958732	0.905063	0.903106	0.884516	0.941286	0.885623	0.948692	0.892798	0.895029	0.874029	0.959111	0.979085
0.0599681	1	0.964946	0.955442	0.909552	0.937609	0.959146	0.910324	0.904477	0.892817	0.951121	0.896258	0.952334	0.900174	0.898511	0.860885	0.956303	0.980726
0.0781566	0.0206147	1	0.971233	0.887743	0.91508	0.974002	0.913214	0.907835	0.921055	0.962823	0.933156	0.97215	0.931127	0.918581	0.872656	0.977956	0.964444
0.117706	0.0552165	0.0343134	1	0.869867	0.886827	0.942485	0.905859	0.901968	0.893431	0.954502	0.8818	0.930904	0.883491	0.886453	0.878714	0.939721	0.939394
0.17411	0.220397	0.242252	0.273709	1	0.937188	0.92547	0.887785	0.835416	0.913647	0.894001	0.898817	0.897055	0.894797	0.860916	0.774735	0.90285	0.909312
0.0726821	0.124008	0.139192	0.179188	0.110284	1	0.945124	0.861954	0.804211	0.883801	0.905845	0.898007	0.933422	0.926542	0.875696	0.769296	0.918503	0.926145
0.00222158	0.0571605	0.0774287	0.111878	0.165568	0.0608089	1	0.911519	0.882575	0.930464	0.930192	0.94838	0.968138	0.947436	0.930302	0.834014	0.973319	0.967265
0.341457	0.270315	0.247276	0.213604	0.485418	0.399866	0.326099	1	0.959796	0.951834	0.895451	0.904264	0.902093	0.8646	0.926397	0.898367	0.94138	0.925285
0.503763	0.415852	0.378673	0.351942	0.623848	0.570876	0.465824	0.125865	1	0.905521	0.877701	0.854797	0.874232	0.815021	0.899561	0.894608	0.927737	0.917
0.265357	0.205607	0.184889	0.150616	0.425939	0.324306	0.262112	0.0604857	0.18288	1	0.892459	0.956004	0.919195	0.919825	0.933034	0.83255	0.942096	0.90858
0.110436	0.162711	0.182926	0.217251	0.0626292	0.0478624	0.105654	0.430503	0.562155	0.367501	1	0.898318	0.94697	0.902334	0.845272	0.856331	0.94085	0.938059
0.0402667	0.0121689	0.0320239	0.0637436	0.199306	0.0969509	0.0415001	0.266128	0.387796	0.211541	0.144169	1	0.960523	0.934129	0.899052	0.796279	0.957444	0.907632
0.0226182	0.075424	0.096072	0.129127	0.144014	0.0387442	0.0196545	0.340116	0.47467	0.279594	0.0848199	0.0599125	1	0.949253	0.902773	0.837047	0.974688	0.956403
0.0296481	0.02831	0.0486366	0.0828059	0.19085	0.0953729	0.0286196	0.297525	0.450196	0.233052	0.134052	0.0140889	0.0472828	1	0.889385	0.774775	0.928027	0.905571
0.486818	0.374186	0.345521	0.313593	0.573717	0.555818	0.425616	0.0999286	0.0235055	0.158102	0.528169	0.350691	0.432349	0.399857	1	0.862843	0.930479	0.914211
0.306814	0.212075	0.187487	0.153952	0.419527	0.378348	0.266246	0.0600714	0.198289	0.00149149	0.370434	0.204162	0.277548	0.237658	0.16818	1	0.876729	0.866979
0.124799	0.063283	0.0423816	0.00806777	0.282461	0.185714	0.119963	0.205285	0.340418	0.142631	0.225352	0.0717008	0.137375	0.0909469	0.304624	0.145593	1	0.969057
0.0553292	0.00479563	0.0254484	0.0605421	0.217481	0.120457	0.0528828	0.277074	0.423794	0.210975	0.158646	0.00783254	0.0713703	0.0239997	0.38546	0.220963	0.0685693	1
