# Supplementary material for: Spinal premotor interneurons controlling antagonistic muscles are spatially intermingled
Source: eLife. 2022 Dec 13;11:e81976. doi: 10.7554/eLife.81976 (PMC9844990; doi:10.7554/eLife.81976)
Supplement: Figure 4—figure supplement 2—source data 2. [file elife-81976-fig4-figsupp2-data2.xlsx]

## Sheet: Sheet1
LG-high	LG-low
328.81	321.89
330.31	340.61
322.43	344.45
316.04	260.94
350.7	307.09
365.09	310.88
330.75	320.94
285.45
267
294.1
352.39
