# Supplementary material for: Spinal premotor interneurons controlling antagonistic muscles are spatially intermingled
Source: eLife. 2022 Dec 13;11:e81976. doi: 10.7554/eLife.81976 (PMC9844990; doi:10.7554/eLife.81976)
Supplement: Figure 4—figure supplement 2—source data 3. [file elife-81976-fig4-figsupp2-data3.xlsx]

## Sheet: Sheet1
1	0.919479	0.833915	0.885052	0.898665	0.863024	0.873696	0.872665	0.866304	0.925581	0.737722	0.820038	0.687755
0.189852	1	0.850813	0.907273	0.900731	0.782463	0.909947	0.905759	0.906025	0.939909	0.740707	0.824446	0.664062
0.35617	0.193467	1	0.884922	0.822779	0.71402	0.859381	0.816901	0.8483	0.862231	0.69479	0.724984	0.642021
0.165873	0.0153328	0.201768	1	0.894867	0.817436	0.908936	0.897352	0.900644	0.919598	0.688342	0.76255	0.729403
0.118297	0.313985	0.475919	0.285016	1	0.894469	0.925638	0.887529	0.833305	0.892274	0.743887	0.843489	0.677718
0.329756	0.536611	0.643894	0.485124	0.212029	1	0.806216	0.799207	0.728741	0.797101	0.634607	0.7992	0.6596
0.0191198	0.204353	0.387821	0.184547	0.0954926	0.292252	1	0.904262	0.869228	0.891668	0.741081	0.800775	0.62905
0.0748209	0.116034	0.287479	0.0944331	0.196897	0.421997	0.09214	1	0.835285	0.879401	0.684431	0.768603	0.680307
0.333084	0.154116	0.0501067	0.16005	0.463312	0.690766	0.349625	0.263066	1	0.892865	0.705523	0.743107	0.596607
0.113309	0.0732025	0.251394	0.0547062	0.234346	0.448275	0.130815	0.0402601	0.218521	1	0.782546	0.79598	0.628834
0.0478279	0.242027	0.375191	0.208733	0.0706748	0.308888	0.0276219	0.125215	0.369377	0.160006	1	0.669951	0.424056
0.174146	0.37387	0.483767	0.32985	0.0593658	0.167171	0.149342	0.25714	0.499618	0.286358	0.139191	1	0.530998
0.0950046	0.290161	0.413529	0.253216	0.0210634	0.25241	0.0738834	0.173144	0.411348	0.205993	0.0483704	0.0847226	1
