# Supplementary material for: Spinal premotor interneurons controlling antagonistic muscles are spatially intermingled
Source: eLife. 2022 Dec 13;11:e81976. doi: 10.7554/eLife.81976 (PMC9844990; doi:10.7554/eLife.81976)
Supplement: Figure 4—figure supplement 2—source data 4. [file elife-81976-fig4-figsupp2-data4.xlsx]

## Sheet: Sheet1
TA-high	TA-low
312.44	332.1
345.67	365.17
363.1	340.96
342.75	296.32
297.58	305.23
276.38	312.38
314.8
