# Supplementary material for: Spinal premotor interneurons controlling antagonistic muscles are spatially intermingled
Source: eLife. 2022 Dec 13;11:e81976. doi: 10.7554/eLife.81976 (PMC9844990; doi:10.7554/eLife.81976)
Supplement: Figure 4—figure supplement 3—source data 1. [file elife-81976-fig4-figsupp3-data1.xlsx]

## Sheet: Sheet1
Code	Lab	Injection	Perfusion	Muscle	Titre	MNs	Double labelled MNs	Ipsi	Contra	Total	premotor INs/MNs	Section sampling
					I.U.			premotor INs	premotor INs	premotor INs	ratio
170427n2	UCL	P2	P10	LG	1×1010	46	3	741	116	857	19	1/2 (30 μm)		92	1714
				TA	5×109	41		912	88	1000	24			82	2000
170427n3	UCL	P2	P10	LG	1×1010	32	2	620	87	707	22	1/2 (30 μm)		64	1414
				TA	5×109	6		386	34	420	70			12	840
170503n6	UCL	P2	P10	LG	1×1010	83	1	1935	639	2574	31	1/2 (30 μm)		166	5148
				TA	5×109	55		1887	315	2202	40			110	4404
170125n3	UCL	P2	P10	LG	5×109	39	0	670	107	777	20	1/2 (30 μm)		78	1554
				MG	5×109	39		819	307	1126	29			78	2252
170508n7	UCL	P2	P10	LG	1×1010	110	3	1955	382	2337	21	1/2 (30 μm)		220	4674
				MG	5×109	67		1497	429	1926	29			134	3852
170125n7	UCL	P2	P10	TA	5×109	47	0	907	308	1215	26	1/2 (30 μm)		94	2430
				PL	5×109	39		1044	195	1239	32			78	2478
170125n8	UCL	P2	P10	TA	5×109	22	2	920	157	1077	49	1/2 (30 μm)		44	2154
				PL	5×109	22		741	83	824	37			44	1648
1570	UoG	P1	P10	LG	2×108	11	-	1111	404	1515	138	1/8 (60 μm)	L	88	12120
1571	UoG	P1	P10	LG	2×108	12	-	688	196	884	74	1/8 (60 μm)	L	96	7072
1573	UoG	P1	P10	TA	5×108	10	-	447	68	515	52	1/8 (60 μm)	L	80	4120
1574	UoG	P1	P10	TA	5×108	14	-	297	26	323	23	1/8 (60 μm)	L	112	2584
1577	UoG	P2	P10	LG	2×109	18	2	313	43	356	20	1/8 (60 μm)		144	2848
				TA	5×109	26		688	105	793	31			208	6344
1578	UoG	P2	P10	LG	2×109	21	5	292	34	326	16	1/8 (60 μm)		168	2608
				TA	5×109	22		790	130	920	42			176	7360
1579	UoG	P2	P10	LG	2×109	30	1	1023	194	1217	41	1/8 (60 μm)		240	9736
				MG	5×108	7		169	19	188	27			56	1504
1580	UoG	P2	P10	LG	2×109	14	0	414	48	462	33	1/8 (60 μm)		112	3696
				MG	5×108	8		470	87	557	70			64	4456
1605	UoG	P1	P10	MG	1×108	6	-	412	110	522	87	1/8 (60 μm)		48	4176
1611	UoG	P1	P10	PL	1×108	2	-	167	24	191	96	1/8 (60 μm)		16	1528
1613	UoG	P2	P10	PL	1×108	1	-	164	16	180	180	1/8 (60 μm)		8	1440
1639	UoG	P2	P10	TA	2×108	15	-	591	94	685	46	1/8 (60 μm)	L	120	5480
1640	UoG	P2	P10	PL	2×108	20	-	629	122	751	38	1/8 (60 μm)		160	6008
1644	UoG	P2	P10	LG	1×108	1	-	142	32	174	174	1/8 (60 μm)	L	8	1392
				TA	2×108	-		57	11	68	-		L		544
1646	UoG	P2	P10	LG	1×108	1	-	90	16	106	106	1/8 (60 μm)	L	8	848
				TA	2×108	3		76	13	89	30		L	24	712
1653	UoG	P2	P10	LG	1×108	2	-	60	6	66	33	1/8 (60 μm)	L	16	528
				TA	2×108	2		58	8	66	33		L	16	528
1656	UoG	P2	P10	LG	1×108	-	-	563	145	708	-	1/8 (60 μm)	L		5664
1657	UoG	P2	P10	LG	1×108	1	-	323	51	374	374	1/8 (60 μm)	L	8	2992
1660	UoG	P2	P10	MG	2×108	7	-	509	3	512	73	1/8 (60 μm)		56	4096
1661	UoG	P2	P10	MG	2×108	10	-	175	63	238	24	1/8 (60 μm)		80	1904
1662	UoG	P2	P10	MG	2×108	10	-	375	230	605	61	1/8 (60 μm)		80	4840
1701	UoG	P2	P10	LG	2×109	8	2	169	26	195	24	1/8 (60 μm)		64	1560
				MG	5×109	34		594	190	784	23			272	6272
1702	UoG	P2	P10	LG	2×109	14	2	561	107	668	48	1/8 (60 μm)		112	5344
				MG	5×109	2		76	11	87	44			16	696
353	MDC	P4	P10	GS	1×109	31	-	1542	431	1973	64	All (40 μm)		31	1973
399	MDC	P4	P10	GS	1×109	41	-	569	77	646	16	All (40 μm)		41	646
1332	MDC	P4	P10	GS	1×109	18	-	1605	323	1928	107	All (40 μm)		18	1928
1349	MDC	P4	P10	GS	1×109	18	-	1416	459	1875	104	All (40 μm)		18	1875
700	MDC	P4	P10	TA	1×109	47	-	1723	122	1845	39	All (40 μm)		47	1845
721	MDC	P4	P10	TA	1×109	22	-	1934	465	2399	109	All (40 μm)		22	2399
1324	MDC	P4	P10	TA	1×109	17	-	2041	301	2342	138	All (40 μm)		17	2342

## Sheet: Sheet2
mnhigh	inhigh	mnlow	inlow
92	1714	88	12120
82	2000	96	7072
64	1414	80	4120
12	840	112	2584
166	5148	120	5480
110	4404	8	1392
78	1554	8	848
78	2252	24	712
220	4674	16	528
134	3852	16	528
94	2430	8	2992
78	2478
44	2154
44	1648
144	2848
208	6344
168	2608
176	7360
240	9736
56	1504
112	3696
64	4456
48	4176
16	1528
8	1440
160	6008
56	4096
80	1904
80	4840
64	1560
272	6272
112	5344
16	696
31	1973
41	646
18	1928
18	1875
47	1845
22	2399
17	2342
