# Supplementary material for: Spinal premotor interneurons controlling antagonistic muscles are spatially intermingled
Source: eLife. 2022 Dec 13;11:e81976. doi: 10.7554/eLife.81976 (PMC9844990; doi:10.7554/eLife.81976)
Supplement: Figure 4—source data 1. [file elife-81976-fig4-data1.xlsx]

## Sheet: Sheet1
1	0.931132	0.82161	0.816388	0.654943	0.920113	0.876123	0.877531	0.851874	0.904007	0.800805	0.784424	0.580428
0.0599125	1	0.87651	0.831654	0.671598	0.944607	0.915347	0.932861	0.896158	0.939708	0.817017	0.806405	0.63899
0.0140889	0.0472828	1	0.77674	0.566591	0.824708	0.818729	0.819138	0.849257	0.8157	0.784175	0.6956	0.561547
0.350691	0.432349	0.399857	1	0.701211	0.839985	0.824057	0.783504	0.786725	0.835068	0.722934	0.753351	0.541032
0.204162	0.277548	0.237658	0.16818	1	0.69968	0.671933	0.705543	0.616037	0.744073	0.588153	0.604689	0.619092
0.0717008	0.137375	0.0909469	0.304624	0.145593	1	0.926065	0.917357	0.870973	0.925457	0.795061	0.8396	0.685756
0.00783254	0.0713703	0.0239997	0.38546	0.220963	0.0685693	1	0.918852	0.900005	0.922502	0.81739	0.823497	0.671841
0.0219871	0.0881302	0.040916	0.391135	0.218419	0.0555762	0.0156143	1	0.874113	0.942861	0.80362	0.807206	0.669208
0.209604	0.156839	0.209179	0.616588	0.453408	0.301056	0.237675	0.263066	1	0.915975	0.782847	0.747574	0.617981
0.0138483	0.0498375	0.000845438	0.416729	0.249675	0.0931533	0.0239035	0.0402601	0.218521	1	0.823432	0.830479	0.669297
0.125675	0.195177	0.153999	0.264503	0.0932755	0.0602181	0.133372	0.125215	0.369377	0.160006	1	0.828562	0.444895
0.233645	0.310879	0.283584	0.147819	0.0348955	0.178691	0.259519	0.25714	0.499618	0.286358	0.139191	1	0.534946
0.165902	0.237214	0.196009	0.213063	0.0442445	0.104074	0.178136	0.173144	0.411348	0.205993	0.0483704	0.0847226	1
