# Supplementary material for: Spinal premotor interneurons controlling antagonistic muscles are spatially intermingled
Source: eLife. 2022 Dec 13;11:e81976. doi: 10.7554/eLife.81976 (PMC9844990; doi:10.7554/eLife.81976)
Supplement: Figure 4—source data 2. [file elife-81976-fig4-data2.xlsx]

## Sheet: Sheet1
LG	TA
321.89	332.1
340.61	365.17
344.45	340.96
260.94	296.32
307.09	305.23
310.88	312.38
320.94
