# Supplementary material for: Spinal premotor interneurons controlling antagonistic muscles are spatially intermingled
Source: eLife. 2022 Dec 13;11:e81976. doi: 10.7554/eLife.81976 (PMC9844990; doi:10.7554/eLife.81976)
Supplement: Figure 5—source data 1. [file elife-81976-fig5-data1.xlsx]

## Sheet: Sheet1
1	0.962279	0.895332	0.888678	0.932766	0.876882	0.931516	0.908649	0.775192	0.95896	0.905831	0.894745	0.893885	0.946504	0.910858	0.859472	0.95903	0.896942	0.86952	0.879508	0.946443	0.954873	0.900252	0.945166	0.9188	0.969919	0.90894	0.937295
0.0599125	1	0.954235	0.943172	0.973775	0.920246	0.956028	0.909209	0.81437	0.976286	0.952824	0.898616	0.929955	0.965974	0.90206	0.877712	0.920808	0.943941	0.923001	0.942677	0.968219	0.960772	0.917551	0.918879	0.890728	0.979693	0.934455	0.949882
0.0402667	0.0226182	1	0.978043	0.974007	0.946917	0.916676	0.910024	0.855942	0.965036	0.98091	0.901514	0.928098	0.966776	0.913308	0.908119	0.893314	0.946668	0.945514	0.941075	0.929308	0.956642	0.863824	0.833974	0.843247	0.934831	0.954791	0.925679
0.0121689	0.075424	0.0599681	1	0.959187	0.944858	0.895256	0.896789	0.867287	0.952475	0.978626	0.918092	0.929992	0.954229	0.90933	0.907008	0.884966	0.947261	0.94443	0.928847	0.931394	0.926143	0.883632	0.816877	0.845647	0.917851	0.944079	0.916844
0.0320239	0.096072	0.0781566	0.0206147	1	0.966363	0.935313	0.927736	0.856959	0.98005	0.967071	0.888348	0.905819	0.973602	0.917644	0.908518	0.917467	0.959899	0.941997	0.960494	0.946997	0.954229	0.883585	0.871063	0.860858	0.956041	0.943009	0.954792
0.0637436	0.129127	0.117706	0.0552165	0.0343134	1	0.877413	0.889007	0.87647	0.932782	0.932376	0.872448	0.86527	0.933879	0.906253	0.898863	0.885266	0.955231	0.923592	0.950844	0.894563	0.899616	0.853261	0.797271	0.838085	0.907811	0.908393	0.92525
0.0140889	0.0472828	0.0296481	0.02831	0.0486366	0.0828059	1	0.91293	0.765382	0.928219	0.915237	0.876558	0.912206	0.948716	0.871557	0.824089	0.918962	0.902217	0.893428	0.895073	0.932667	0.943074	0.885936	0.900969	0.883059	0.954772	0.897145	0.923967
0.350691	0.432349	0.486818	0.374186	0.345521	0.313593	0.399857	1	0.812392	0.932485	0.919048	0.853496	0.876738	0.940166	0.928973	0.898883	0.934174	0.848031	0.902063	0.841435	0.897456	0.943103	0.844045	0.853531	0.828333	0.917981	0.919171	0.892275
0.204162	0.277548	0.306814	0.212075	0.187487	0.153952	0.237658	0.16818	1	0.862796	0.860624	0.773977	0.751015	0.806984	0.882848	0.892742	0.811939	0.856025	0.906656	0.836912	0.821766	0.805641	0.813624	0.734405	0.744679	0.794764	0.854922	0.835199
0.0717008	0.137375	0.124799	0.063283	0.0423816	0.00806777	0.0909469	0.304624	0.145593	1	0.968905	0.896466	0.911507	0.968222	0.944001	0.931632	0.941235	0.940055	0.944951	0.931642	0.959815	0.969816	0.908725	0.90569	0.879862	0.963069	0.953383	0.951847
0.00783254	0.0713703	0.0553292	0.00479563	0.0254484	0.0605421	0.0239997	0.38546	0.220963	0.0685693	1	0.911438	0.91692	0.965924	0.925859	0.924766	0.905955	0.940186	0.952735	0.921538	0.943287	0.953244	0.877005	0.833668	0.851871	0.931114	0.947466	0.929537
0.199306	0.144014	0.17411	0.220397	0.242252	0.273709	0.19085	0.573717	0.419527	0.282461	0.217481	1	0.932789	0.922492	0.893694	0.832036	0.913704	0.90165	0.856736	0.834224	0.907157	0.921291	0.835185	0.816196	0.928198	0.903847	0.900458	0.907579
0.0969509	0.0387442	0.0726821	0.124008	0.139192	0.179188	0.0953729	0.555818	0.378348	0.185714	0.120457	0.110284	1	0.942317	0.856063	0.797423	0.88003	0.89338	0.869844	0.863008	0.911707	0.941254	0.867691	0.842592	0.871235	0.930779	0.91042	0.878257
0.0415001	0.0196545	0.00222158	0.0571605	0.0774287	0.111878	0.0286196	0.425616	0.266246	0.119963	0.0528828	0.165568	0.0608089	1	0.914174	0.881229	0.930439	0.929914	0.914804	0.907747	0.937024	0.973427	0.868949	0.872481	0.874847	0.962152	0.937154	0.940113
0.266128	0.340116	0.341457	0.270315	0.247276	0.213604	0.297525	0.0999286	0.0600714	0.205285	0.277074	0.485418	0.399866	0.326099	1	0.966302	0.953427	0.902131	0.942778	0.862663	0.906812	0.93047	0.879225	0.844695	0.888661	0.908752	0.924231	0.929062
0.387796	0.47467	0.503763	0.415852	0.378673	0.351942	0.450196	0.0235055	0.198289	0.340418	0.423794	0.623848	0.570876	0.465824	0.125865	1	0.905343	0.881174	0.947429	0.863578	0.878353	0.891832	0.848756	0.80251	0.814189	0.860174	0.911134	0.899906
0.211541	0.279594	0.265357	0.205607	0.184889	0.150616	0.233052	0.158102	0.00149149	0.142631	0.210975	0.425939	0.324306	0.262112	0.0604857	0.18288	1	0.891617	0.890638	0.8578	0.923468	0.952714	0.883615	0.916281	0.936629	0.943432	0.912086	0.942609
0.144169	0.0848199	0.110436	0.162711	0.182926	0.217251	0.134052	0.528169	0.370434	0.225352	0.158646	0.0626292	0.0478624	0.105654	0.430503	0.562155	0.367501	1	0.925266	0.968339	0.935171	0.903396	0.894374	0.831642	0.901148	0.925165	0.902094	0.957692
0.222639	0.29887	0.327806	0.235525	0.20656	0.174856	0.266696	0.15615	0.0186325	0.165428	0.243848	0.443307	0.400441	0.287972	0.0437675	0.181296	0.0182062	0.390018	1	0.91769	0.918213	0.912494	0.896545	0.819769	0.835902	0.905073	0.930295	0.915343
0.0936554	0.0348741	0.0628793	0.114879	0.133776	0.169774	0.0856198	0.496563	0.332136	0.177549	0.111185	0.112273	0.00363405	0.0559604	0.386864	0.538439	0.318649	0.0508133	0.356748	1	0.918052	0.887788	0.874285	0.826297	0.83706	0.906345	0.898434	0.916654
0.103487	0.0462944	0.0722076	0.120255	0.142499	0.17308	0.0911445	0.463528	0.3121	0.182038	0.117172	0.0952481	0.00996281	0.0664298	0.383435	0.523909	0.325697	0.0364629	0.338969	0.0130833	1	0.941482	0.93737	0.896209	0.910707	0.955808	0.914688	0.936921
0.0122268	0.0767543	0.059791	0.0002118	0.0211073	0.0566368	0.028984	0.383909	0.218428	0.0646941	0.0046723	0.224881	0.124711	0.0579831	0.274671	0.417732	0.207617	0.164118	0.239439	0.116684	0.124149	1	0.869496	0.903054	0.892948	0.966101	0.949891	0.933475
0.0243499	0.0873783	0.0754127	0.0133142	0.00717747	0.0411748	0.0405194	0.352837	0.19281	0.0492804	0.018278	0.230186	0.13921	0.0698203	0.25463	0.402918	0.191449	0.175198	0.220204	0.127294	0.129407	0.013972	1	0.878766	0.878374	0.917801	0.856473	0.89563
0.0940583	0.162032	0.155722	0.0889078	0.0665256	0.0321398	0.117549	0.291301	0.126634	0.0238488	0.0946625	0.308112	0.219424	0.145624	0.184464	0.324771	0.119961	0.250573	0.146993	0.206047	0.206827	0.0906241	0.0744808	1	0.896172	0.938099	0.858603	0.90719
0.145442	0.0887449	0.114663	0.16242	0.184918	0.215072	0.13365	0.506087	0.355773	0.223945	0.159207	0.0529384	0.0532198	0.109046	0.423513	0.556226	0.367716	0.00741664	0.37859	0.0561045	0.0415454	0.166204	0.172241	0.24794	1	0.914022	0.855999	0.932722
0.0126454	0.0498423	0.0302675	0.0266204	0.0470415	0.0817141	0.00187242	0.397777	0.237357	0.0897774	0.0220708	0.196033	0.0932747	0.0306972	0.296498	0.436202	0.2321	0.136455	0.258685	0.0873925	0.0963611	0.0268718	0.039714	0.115231	0.13879	1	0.927566	0.951665
0.0400396	0.105132	0.100309	0.0311781	0.00953455	0.0254124	0.0604099	0.370674	0.198022	0.0334924	0.0366521	0.249764	0.173546	0.0882801	0.242869	0.399391	0.176127	0.193465	0.22252	0.149516	0.147951	0.0320736	0.0170465	0.0597026	0.190113	0.0577235	1	0.896928
0.0681431	0.0123252	0.0319714	0.0787629	0.100165	0.127103	0.0534747	0.388592	0.253544	0.13541	0.0751448	0.118905	0.0213348	0.0300081	0.317994	0.42918	0.274171	0.0658148	0.271566	0.0185809	0.0297185	0.0805805	0.0888164	0.155338	0.0691789	0.0570044	0.103219	1
