# Supplementary material for: Spinal premotor interneurons controlling antagonistic muscles are spatially intermingled
Source: eLife. 2022 Dec 13;11:e81976. doi: 10.7554/eLife.81976 (PMC9844990; doi:10.7554/eLife.81976)
Supplement: Figure 5—source data 2. [file elife-81976-fig5-data2.xlsx]

## Sheet: Sheet1
LG	MG
328.81	306.15
330.31	347.87
322.43	339.89
316.04	324.35
350.7	338.05
365.09	313.48
330.75	329.4
285.45	352.9
267	322.13
294.1	322.39
352.39
321.89
340.61
344.45
260.94
307.09
310.88
320.94
