# Supplementary material for: Spinal premotor interneurons controlling antagonistic muscles are spatially intermingled
Source: eLife. 2022 Dec 13;11:e81976. doi: 10.7554/eLife.81976 (PMC9844990; doi:10.7554/eLife.81976)
Supplement: Figure 5—source data 3. [file elife-81976-fig5-data3.xlsx]

## Sheet: Sheet1
1	0.936935	0.971848	0.96927	0.976425	0.886115	0.902887	0.835954	0.911905	0.969871	0.946747	0.891254	0.954678	0.933657	0.917485	0.965286	0.935997	0.953489
0.263066	1	0.935658	0.964252	0.961163	0.863955	0.863324	0.7749	0.926172	0.957366	0.901335	0.804235	0.92593	0.928351	0.954647	0.908458	0.96136	0.958446
0.0748209	0.333084	1	0.968182	0.970529	0.892838	0.918406	0.858682	0.903165	0.954953	0.952456	0.913669	0.934753	0.934663	0.905328	0.974621	0.922178	0.939094
0.116034	0.154116	0.189852	1	0.979572	0.884374	0.913378	0.816925	0.910965	0.95733	0.934682	0.853707	0.94111	0.9316	0.937813	0.95636	0.941374	0.959825
0.0402601	0.218521	0.113309	0.0732025	1	0.899636	0.909226	0.816006	0.921628	0.972358	0.946654	0.872718	0.950139	0.939311	0.940789	0.960833	0.947121	0.965889
0.125215	0.369377	0.0478279	0.242027	0.160006	1	0.900995	0.66059	0.835764	0.854231	0.889907	0.812781	0.913593	0.882543	0.894476	0.87188	0.816397	0.899057
0.25714	0.499618	0.174146	0.37387	0.286358	0.139191	1	0.73298	0.824119	0.89117	0.945316	0.910066	0.912155	0.85235	0.865664	0.901456	0.831121	0.914335
0.173144	0.411348	0.0950046	0.290161	0.205993	0.0483704	0.0847226	1	0.76642	0.849813	0.811728	0.828328	0.75276	0.770905	0.690341	0.882615	0.817111	0.740732
0.287479	0.0501067	0.35617	0.193467	0.251394	0.375191	0.483767	0.413529	1	0.942778	0.874852	0.790308	0.907901	0.891497	0.897668	0.885238	0.96508	0.920879
0.0944331	0.16005	0.165873	0.0153328	0.0547062	0.208733	0.32985	0.253216	0.201768	1	0.942618	0.887247	0.945395	0.917302	0.919222	0.948533	0.969111	0.95584
0.196897	0.463312	0.118297	0.313985	0.234346	0.0706748	0.0593658	0.0210634	0.475919	0.285016	1	0.947595	0.953975	0.877504	0.896921	0.9318	0.904732	0.95506
0.421997	0.690766	0.329756	0.536611	0.448275	0.308888	0.167171	0.25241	0.643894	0.485124	0.212029	1	0.874586	0.79615	0.76751	0.900911	0.823919	0.873145
0.09214	0.349625	0.0191198	0.204353	0.130815	0.0276219	0.149342	0.0738834	0.387821	0.184547	0.0954926	0.292252	1	0.910381	0.937844	0.909193	0.921623	0.969233
0.0471367	0.301618	0.0284428	0.163637	0.0854109	0.0789349	0.217125	0.126715	0.316072	0.137124	0.150043	0.389258	0.046807	1	0.915658	0.929761	0.888002	0.902286
0.0391327	0.21393	0.111736	0.0747395	0.00114973	0.155906	0.286589	0.199602	0.242286	0.0550968	0.235001	0.466369	0.129188	0.0836187	1	0.8684	0.91316	0.952885
0.0635203	0.329185	0.0132	0.180554	0.102729	0.0635692	0.196336	0.112835	0.346984	0.155581	0.134273	0.357345	0.0320917	0.0160669	0.102359	1	0.903971	0.907929
0.309568	0.0732069	0.377817	0.216141	0.273861	0.399276	0.507397	0.438	0.0225334	0.224664	0.495683	0.661268	0.410042	0.339216	0.265585	0.368286	1	0.946211
0.0223242	0.225175	0.0930348	0.0868611	0.0159665	0.13493	0.252623	0.178408	0.262916	0.0690672	0.209242	0.404383	0.112309	0.0648516	0.0145503	0.0818212	0.285698	1
