# Supplementary material for: Spinal premotor interneurons controlling antagonistic muscles are spatially intermingled
Source: eLife. 2022 Dec 13;11:e81976. doi: 10.7554/eLife.81976 (PMC9844990; doi:10.7554/eLife.81976)
Supplement: Figure 5—source data 4. [file elife-81976-fig5-data4.xlsx]

## Sheet: Sheet1
TA	PL
312.44	328.06
345.67	339.69
363.1	322.26
342.75	379.59
297.58	329.62
276.38
314.8
332.1
365.17
340.96
296.32
305.23
312.38
