# Supplementary material for: Spinal premotor interneurons controlling antagonistic muscles are spatially intermingled
Source: eLife. 2022 Dec 13;11:e81976. doi: 10.7554/eLife.81976 (PMC9844990; doi:10.7554/eLife.81976)
Supplement: Figure 6—source data 1. [file elife-81976-fig6-data1.xlsx]

## Sheet: Sheet1
294.267	317.874
322.62	354.865
293.263	326.15
318.23
