# Supplementary material for: Spinal premotor interneurons controlling antagonistic muscles are spatially intermingled
Source: eLife. 2022 Dec 13;11:e81976. doi: 10.7554/eLife.81976 (PMC9844990; doi:10.7554/eLife.81976)
Supplement: Figure 6—source data 2. [file elife-81976-fig6-data2.xlsx]

## Sheet: Sheet1
-140.446	73.7849
-141.156	281.614
-84.5645	17.7338
307.771
