# Supplementary material for: Spinal premotor interneurons controlling antagonistic muscles are spatially intermingled
Source: eLife. 2022 Dec 13;11:e81976. doi: 10.7554/eLife.81976 (PMC9844990; doi:10.7554/eLife.81976)
Supplement: Figure 6—source data 4. [file elife-81976-fig6-data4.xlsx]

## Sheet: Sheet1
377.029	403.566
396.864	439.647
392.824	436.921
402.03
