# Supplementary material for: Spinal premotor interneurons controlling antagonistic muscles are spatially intermingled
Source: eLife. 2022 Dec 13;11:e81976. doi: 10.7554/eLife.81976 (PMC9844990; doi:10.7554/eLife.81976)
Supplement: Figure 7—source data 1. [file elife-81976-fig7-data1.xlsx]

## Sheet: Sheet1
LG_ChAT::cre	GS_Olig2::cre	TA_ChAT::cre	TA_Olig2::cre
328.81	316.85	312.44	317.86
330.31	304.7	345.67	309.81
322.43	286.27	363.1	291.84
316.04	282.67	342.75
350.7		297.58
365.09		276.38
330.75		314.8
285.45		332.1
267		365.17
294.1		340.96
352.39		296.32
321.89		305.23
340.61		312.38
344.45
260.94
307.09
310.88
320.94
