# Supplementary material for: Spinal premotor interneurons controlling antagonistic muscles are spatially intermingled
Source: eLife. 2022 Dec 13;11:e81976. doi: 10.7554/eLife.81976 (PMC9844990; doi:10.7554/eLife.81976)
Supplement: Figure 8—source data 1. [file elife-81976-fig8-data1.xlsx]

## Sheet: Sheet1
GS	TA
328.1	348.6
303.15	294.32
248.64
237.26
