# Supplementary material for: Spinal premotor interneurons controlling antagonistic muscles are spatially intermingled
Source: eLife. 2022 Dec 13;11:e81976. doi: 10.7554/eLife.81976 (PMC9844990; doi:10.7554/eLife.81976)
Supplement: Figure 10—source data 1. [file elife-81976-fig10-data1.xlsx]

## Sheet: Sheet1
GS_AAV-G_WT	GS_AAV-G-FLEX_ChAT	TA_AAV-G_WT	TA_AAV-G-FLEX_ChAT
328.1	403.36	348.6	348.02
303.15	383.44	294.32	366.7
248.64	350.66		349.63
237.26	382.36
