# Supplementary material for: Spinal premotor interneurons controlling antagonistic muscles are spatially intermingled
Source: eLife. 2022 Dec 13;11:e81976. doi: 10.7554/eLife.81976 (PMC9844990; doi:10.7554/eLife.81976)
Supplement: Figure 11—source data 1. [file elife-81976-fig11-data1.xlsx]

## Sheet: Sheet1
GS	TA
317.53	345.63
349.43	356.1
356.61	376.27
377.61	383.43
