# Supplementary material for: Spinal premotor interneurons controlling antagonistic muscles are spatially intermingled
Source: eLife. 2022 Dec 13;11:e81976. doi: 10.7554/eLife.81976 (PMC9844990; doi:10.7554/eLife.81976)
Supplement: Figure 12—figure supplement 1—source data 1. — The x-y coordinates are normalized (between –0.5 and 0.5) and scaled to an idealized spinal cord of dimensions 1700 μm and 900 μm in the mediolateral and dorsoventral directions respectively, while z coordinates are in micron, with the axis origin taken at the border between L4 and L5 and negative values in the rostral direction. [file elife-81976-fig12-figsupp1-data1.xlsx]

## Sheet: Sheet1
0.38559	-0.104163	-1990.27
0.303174	-0.0923789	-1995.83
0.172212	0.214818	-1997.88
-0.106495	-0.216221	-1993.05
0.359042	-0.0270945	-1913.05
0.242585	-0.332651	-1913.05
0.198528	0.0599662	-1915.83
-0.21694	-0.184688	-1918.61
-0.283565	-0.165989	-1913.05
0.28648	0.0624062	-1913.05
0.361502	-0.0742246	-1913.05
0.438117	-0.145977	-1913.05
-0.304526	0.0813076	-1838.61
-0.141977	-0.170239	-1838.61
0.0968047	0.0630008	-1838.61
0.366113	-0.0775906	-1838.61
0.351432	0.0624066	-1833.05
0.230548	0.167898	-1758.61
0.247397	0.00692406	-1758.61
0.312201	-0.0827401	-1758.61
0.380613	-0.149099	-1758.61
0.423154	0.0148575	-1758.61
-0.182734	-0.17035	-1678.61
-0.220424	-0.25779	-1673.05
0.396385	0.0831717	-1664.71
0.30137	0.0509181	-1670.27
0.353974	-0.0696128	-1670.27
0.336249	-0.0633892	-1667.49
0.331587	-0.172308	-1670.27
0.293375	-0.0857894	-1673.05
0.202266	-0.276968	-1667.49
0.139885	0.0159885	-1673.05
-0.00903029	0.0611992	-1598.61
0.103423	0.0229661	-1598.61
0.367041	0.00514827	-1598.61
0.307012	-0.124485	-1590.27
0.0438321	0.151224	-1514.01
0.0682972	0.0994545	-1513.2
-0.0997115	-0.165861	-1510.18
0.10236	0.220269	-1513.1
0.109421	0.0569377	-1512.74
0.198756	0.0518857	-1510.59
0.310029	-0.120879	-1511.62
0.319803	-0.097547	-1511.35
-0.211476	0.252363	-1438.61
-0.107662	-0.12525	-1432.87
-0.214116	-0.281903	-1432.2
-0.103152	-0.198585	-1432.4
0.114058	0.0887312	-1436
0.126403	0.0838978	-1436.1
0.279149	-0.275285	-1427.01
-0.183085	-0.0630778	-1353.65
-0.171173	-0.0517832	-1353.84
-0.138081	-0.0572858	-1352.4
0.191723	0.260348	-1352.62
0.206794	0.106999	-1351.61
0.0926586	0.108785	-1353.73
0.292726	-0.243938	-1350.35
-0.0665645	-0.161679	-1348.43
0.261161	0.233802	-1278.61
0.120905	0.108121	-1275
0.157505	0.0428225	-1278.61
0.193423	-0.135738	-1278.61
0.275196	0.0853805	-1273.61
0.270027	-0.193589	-1278.61
0.267607	-0.372533	-1275.15
0.348347	0.0562022	-1278.61
0.323714	-0.240032	-1276.09
-0.235571	-0.158599	-1198.61
-0.286354	-0.309796	-1192.03
-0.19071	-0.288859	-1194.04
-0.141445	-0.236034	-1192.99
0.0607787	0.0835097	-1196.67
0.0419497	-0.314497	-1191.04
0.100457	0.311987	-1198.61
0.120076	0.30852	-1198.61
0.148216	0.140427	-1198.61
0.159981	0.15837	-1196.71
0.185749	0.124389	-1193.23
0.201605	0.0998332	-1198.61
0.256057	0.0188809	-1196.46
0.264511	0.0611219	-1192.73
0.27839	0.0613144	-1194.11
0.327067	-0.194089	-1198.61
0.337562	-0.175058	-1198.61
0.359917	-0.202031	-1198.61
0.371417	-0.331118	-1197.08
0.0829997	0.319801	-1109.09
0.183617	0.223829	-1112.73
0.181462	0.0259231	-1118.61
0.194644	-0.0607227	-1117
0.192703	-0.079404	-1113.41
0.203052	-0.0942663	-1112.95
0.209005	0.035329	-1113.9
0.212948	-0.0606423	-1113.97
0.221058	-0.0604072	-1112.86
0.158163	0.107326	-1110.17
0.270892	-0.141675	-1115.07
-0.177557	-0.212975	-1108.09
0.0205318	0.0828909	-1101.93
0.0366305	0.0471308	-1101.93
0.167909	0.191179	-1106.91
0.196868	0.147348	-1035.51
0.276765	0.209198	-1033.68
0.213403	0.146887	-1030.13
0.156321	0.138279	-1033.19
0.16513	0.121556	-1033.11
0.213473	0.120641	-1031.83
0.192026	0.0313015	-1031.09
0.235619	0.0311154	-1030.29
0.313197	-0.343362	-1030.48
0.347799	-0.0317421	-1032.08
0.36861	-0.278739	-1029.28
-0.313617	0.076655	-1024.72
0.139861	0.00521011	-1027.7
0.198834	-0.29627	-1023.38
0.275422	-0.395163	-1024.75
0.347091	-0.313722	-1024.47
0.445724	-0.211312	-1025.44
-0.143839	-0.0359878	-958.61
-0.110445	-0.0379335	-958.61
-0.143053	-0.00769152	-949.591
0.219079	0.195667	-955.401
0.166132	0.0894858	-956.723
0.129761	0.0588808	-954.355
0.273945	0.150295	-952.794
0.156963	0.0521298	-950.903
0.181541	-0.345872	-952.383
0.223308	-0.36702	-952.882
0.245682	-0.251464	-953.089
0.112722	0.203745	-947.946
0.226357	0.282052	-947.609
-0.111657	0.00420887	-878.61
-0.00453342	-0.0625187	-872.979
-0.156108	-0.256906	-878.61
-0.122363	-0.159462	-878.61
-0.154523	-0.179739	-872.782
-0.100079	-0.229399	-871.834
0.21997	0.231479	-878.61
0.171079	0.247784	-869.797
0.205838	0.0603303	-878.61
0.181907	0.128856	-874.601
0.153351	0.0354919	-872.786
0.210938	-0.0382021	-872.817
0.211174	-0.00641799	-871.024
0.204463	-0.340957	-873.736
0.297294	0.0567855	-878.61
0.262925	0.049861	-876.61
0.263386	-0.212383	-878.61
0.328878	-0.18677	-878.61
0.357296	-0.349934	-878.61
0.364295	-0.134801	-878.61
0.253332	-0.202273	-876.477
0.293522	-0.280629	-874.703
0.254916	-0.292486	-871.486
0.336658	-0.253043	-869.512
0.355311	-0.252883	-871.389
-0.171349	-0.106067	-798.61
-0.0895528	0.136895	-790.764
0.00398202	-0.0816164	-791.183
-0.0630992	-0.103118	-796.854
0.194007	0.173255	-793.392
0.207495	0.0648283	-798.61
0.118962	0.118282	-796.236
0.179249	0.0272688	-795.894
0.168198	0.0044773	-790.724
0.209366	-0.312111	-792.546
0.276327	-0.0137432	-792.226
0.281293	0.142139	-789.773
0.306227	0.0711889	-789.927
0.279111	-0.265989	-798.61
0.2704	-0.374392	-791.661
0.336912	-0.194822	-793.318
0.317313	-0.18168	-790.995
-0.23656	-0.0537137	-786.751
-0.160516	-0.240305	-786.755
0.216803	0.209127	-783.982
0.388199	-0.268545	-787.983
-0.0880114	-0.00213649	-718.61
-0.0511533	-0.00921901	-714.399
-0.121157	-0.170816	-713.65
-0.0915394	-0.163451	-712.484
0.0617063	0.213889	-712.119
0.140297	0.17885	-712.59
0.172114	0.134373	-711.756
0.218344	0.150527	-714.012
0.13598	0.0877614	-718.61
0.175494	-0.00514903	-718.61
0.241364	0.263654	-713.312
0.340133	0.0185435	-718.61
0.248327	-0.0677788	-716.404
0.256979	-0.0656535	-712.767
0.247523	-0.00548548	-710.238
0.304777	0.114463	-710.592
0.367565	-0.351643	-712.744
0.215401	-0.311705	-709.753
0.296856	-0.154532	-709.252
0.417289	-0.314701	-716.091
-0.0377831	-0.0564238	-707.355
0.170724	0.214629	-708.195
0.0756724	0.106179	-701.93
0.264919	0.165782	-703.347
0.332425	0.124637	-701.93
0.299535	-0.0221597	-707.217
0.254978	-0.329322	-703.826
0.348475	-0.2516	-704.607
0.372164	-0.250835	-701.93
-0.229229	0.169271	-631.761
-0.028894	0.00598674	-629.351
-0.129506	-0.174519	-635.103
0.0036518	-0.0921294	-632.288
0.0592291	0.313594	-629.157
0.0613859	0.19063	-629.862
0.099797	0.160859	-638.61
0.129491	0.161511	-638.61
0.136169	0.167778	-638.61
0.143752	0.10563	-638.61
0.151515	0.0310981	-638.61
0.122797	0.0893127	-634.671
0.146238	0.0936687	-634.171
0.188574	0.102681	-631.796
0.192547	0.0404789	-634.176
0.106243	0.108383	-631.034
0.129582	0.094618	-631.165
0.235627	0.254	-631.038
0.249837	0.063709	-634.279
0.206585	-0.282827	-630.012
0.267815	-0.0582013	-630.196
0.00342784	-0.062969	-627.017
0.0836372	0.231276	-627.539
0.0768343	0.112108	-627.994
0.244513	0.214355	-627.036
0.263399	0.274201	-621.93
0.273685	-0.0148282	-628.663
0.362903	0.10812	-627.1
0.20063	0.138282	-623.95
0.315134	-0.315889	-627.818
-0.0871529	-0.166347	-549.829
0.037963	0.0174228	-558.61
0.113893	0.0725789	-558.61
0.117789	0.110469	-558.61
0.146435	0.069181	-558.61
0.110263	-0.0881893	-550.786
0.219806	0.00515519	-558.61
0.26567	0.0375864	-558.61
0.229145	-0.0882378	-553.389
0.256437	0.0138236	-553.411
0.295579	-0.112614	-558.61
0.237162	-0.333598	-551.116
0.33499	-0.224864	-549.52
0.347917	-0.277518	-550.436
-0.166057	-0.159159	-472.967
0.0361853	0.0703489	-478.61
0.0529417	0.0302552	-478.61
0.0676488	0.0244722	-478.61
0.0936606	0.0724321	-478.61
-0.0629568	-0.0560104	-472.861
0.0135886	0.0437405	-470.531
-0.12595	-0.160435	-470.055
0.175822	0.193308	-478.61
0.185823	0.165209	-478.61
0.189924	0.151109	-478.61
0.194808	0.200817	-475.829
0.182369	0.136869	-473.61
0.139546	0.0973605	-478.61
0.166757	0.0075171	-478.61
0.171391	0.0625207	-478.61
0.198591	0.116728	-478.61
0.102622	0.0557242	-475.776
0.242156	0.0635086	-471.311
0.421516	-0.338045	-470.252
0.33102	-0.390347	-466.973
0.323393	-0.282349	-463.648
-0.0641922	0.0190686	-398.61
-0.0084219	-0.0475563	-398.61
-0.160848	0.00944895	-392.06
0.0369471	0.0838073	-393.74
0.198399	0.189741	-398.61
0.21291	0.251996	-398.61
0.228679	0.23953	-398.61
0.202231	0.201008	-395.535
0.100878	0.126364	-398.61
0.112383	0.0772415	-398.61
0.141831	0.0890352	-398.61
0.148829	0.00892979	-398.61
0.235576	0.106295	-392.3
0.196167	-0.270906	-395.707
0.260913	-0.0618332	-398.61
0.290007	-0.148684	-398.61
0.238005	-0.310199	-386.454
-0.212524	-0.248023	-313.312
0.0631197	0.232798	-318.61
-0.127431	-0.14524	-314.024
0.125949	0.146219	-318.61
0.139078	0.167471	-318.61
0.145196	0.138273	-318.61
0.189461	0.261633	-318.61
0.23284	0.243535	-318.61
0.126419	0.197876	-316.575
0.197982	0.170788	-315.337
0.079444	0.138603	-313.359
0.0691593	0.0788164	-318.61
0.0747222	0.115699	-318.61
0.0996455	0.0515079	-318.61
0.149815	0.0743888	-318.61
0.230676	0.0490912	-318.61
0.105173	0.0848533	-315.833
0.137629	0.029482	-310.336
0.231389	-0.202485	-315.341
0.18988	-0.315875	-312.52
0.195413	-0.306602	-310.858
0.253387	0.0834862	-314.849
-0.101382	-0.102431	-307.22
-0.244643	-0.281956	-229.397
-0.0749523	-0.169515	-233.101
0.062486	0.146946	-233.045
0.094356	0.152298	-232.837
0.140361	0.184086	-233.435
0.162086	0.144292	-233.481
0.120122	0.145202	-228.966
0.0225531	0.0343113	-238.61
0.192626	-0.0169577	-238.61
0.040671	0.0401412	-232.858
0.0710575	0.0977073	-233.932
0.0984448	0.0793725	-234.337
0.104463	0.108324	-233.313
0.187922	0.0936438	-231.134
0.305672	-0.132776	-232.749
0.224194	0.0754339	-230.523
0.293375	-0.177177	-235.125
0.198325	-0.325049	-233.222
0.274264	-0.297423	-232.522
0.309421	-0.268486	-231.163
-0.0994341	-0.212696	-227.301
0.160478	0.128186	-226.383
0.201936	0.176037	-226.182
0.22052	0.204556	-228.839
0.0746578	0.197152	-225.902
0.0473043	0.121763	-149.822
0.173127	0.123815	-153.142
0.199557	0.16444	-151.997
0.0857965	0.145589	-150.333
0.184966	0.133421	-150.637
0.20591	0.196528	-150.71
0.116521	0.0708017	-151.983
0.172651	0.0640242	-153.689
0.0871034	0.0517949	-150.832
0.116836	0.0923945	-150.207
0.11501	0.0080879	-151.413
0.17109	-0.0238044	-150.386
0.185129	-0.287414	-152.54
0.208565	-0.284727	-152.446
-0.22556	-0.162164	-145.394
-0.00599936	-0.0903711	-143.819
0.0846808	0.186842	-146.75
0.196999	0.188288	-146.782
0.205605	0.247162	-148.651
0.107011	0.215625	-144.069
0.0979838	0.115855	-148.053
0.213009	0.0298727	-148.654
0.188173	-0.00762364	-145.398
0.224408	-0.320099	-147.632
0.240352	-0.341739	-148.541
0.294094	-0.330017	-147.041
0.231557	-0.29933	-144.474
-0.0916974	-0.0512676	-69.7341
0.106662	0.218111	-72.3766
0.123967	0.127963	-72.9246
0.166647	0.176153	-73.9828
0.141657	0.122707	-69.5585
0.206827	0.115966	-70.9846
0.250873	0.180692	-71.4352
0.255975	0.142531	-71.4867
0.267409	0.228055	-71.0132
0.102906	0.108959	-74.1258
0.273844	-0.148125	-72.0083
0.228905	-0.0713671	-70.6604
0.227232	-0.153489	-76.132
0.288446	0.0389383	-70.1418
0.298756	-0.10686	-69.3147
0.409078	-0.312337	-73.3254
0.370437	-0.284927	-69.822
0.149644	0.196344	-68.6162
0.221051	0.0237314	-67.3256
0.252279	-0.0282061	-61.93
0.314723	0.0485677	-61.93
-0.012581	-0.0671253	6.16718
-0.00611733	-0.0471012	10.3039
0.084211	-0.00453296	3.18553
0.0965349	-0.00651874	4.5861
0.0704686	0.0660356	7.30132
0.1565	0.109387	6.77933
0.155295	0.00298978	7.9984
0.140904	0.131507	9.64883
0.182253	0.125013	9.72222
0.178627	-0.166364	8.00249
0.229439	0.179142	10.596
0.235457	0.112762	3.81586
0.229461	0.0314053	6.66151
0.201776	-0.0577817	8.65658
0.249049	0.107952	8.62158
0.0890032	0.183729	13.2585
0.0673519	0.0243709	15.4644
0.180386	0.108566	18.07
0.216076	0.151359	13.2368
0.304738	0.134465	18.07
0.0430162	0.21723	86.5818
0.139279	0.146072	87.0277
0.150443	0.190929	85.7396
0.0329692	0.183981	89.9583
0.121495	0.193511	88.543
0.154179	0.149995	90.3774
0.110489	0.104475	83.0446
0.128285	0.106874	88.2727
0.106479	0.0884214	89.6393
0.199757	0.170267	85.5431
0.208973	0.118103	85.9572
0.240953	0.128644	89.2502
0.162518	-0.0986188	87.6587
0.181921	-0.00237791	86.9475
0.163873	0.0271135	90.2011
0.209243	-0.30495	90.7194
-0.193778	-0.173624	92.539
0.153028	0.20488	93.7108
0.106685	0.218604	95.7454
-0.12125	-0.0160048	161.39
-0.030058	-0.00228924	161.39
-0.160486	-0.147237	161.39
-0.0853917	-0.0939825	161.39
-0.0505035	-0.125378	170.62
0.104259	0.197069	161.39
0.18009	0.159997	161.39
0.211226	0.140511	161.39
0.029013	0.0038683	161.39
0.0787516	0.0283795	161.39
0.133852	0.0557883	161.39
0.197644	0.121084	161.39
0.0758449	0.136526	163.557
0.138503	-0.0889631	162.835
0.22586	0.172883	167.804
0.229258	0.0905797	161.39
0.30581	0.0392133	167.764
0.324157	0.0122649	169.135
0.367705	-0.284436	161.39
0.210038	-0.305759	170.028
0.272788	-0.303623	169.127
-0.193225	-0.171841	171.467
-0.00813808	-0.0477717	243.763
0.227125	0.193135	241.39
0.233447	0.168012	241.39
0.0952103	0.143919	242.85
0.0298269	0.0277722	241.39
0.0734475	0.0871095	245.376
0.138336	0.128657	244.591
0.206536	0.0995706	245.52
0.0636937	0.0144991	246.955
0.109525	0.0931168	249.228
0.28926	0.117541	248.014
0.29571	-0.0961782	247.168
0.35276	0.0252675	251.036
0.2782	-0.121687	244.28
0.240231	-0.263678	248.056
0.318356	-0.350976	247.559
0.334706	-0.367675	246.777
0.305774	-0.136965	248.824
-0.0798942	-0.1439	255.43
0.0373994	0.140787	252.782
0.146701	-0.0157909	253.02
-0.144675	0.0928038	323.796
-0.125236	-0.186636	327.757
0.127825	0.168962	321.39
0.0393305	-0.0110915	321.39
0.0620408	0.0376342	321.39
0.0651488	0.0263057	321.39
0.110068	0.108006	321.39
0.0917979	0.0354615	323.712
0.0382036	0.0188806	327.085
0.0839265	0.0735865	325.894
0.172792	0.170085	321.39
0.258747	0.250358	324.19
0.158498	0.0909721	321.39
0.163003	0.0123332	321.39
0.180679	0.0587322	321.39
0.190963	0.118601	321.39
0.257953	-0.0317079	321.39
0.259266	0.0339556	321.39
0.269483	0.0393783	321.39
0.177608	-0.0501343	326.479
0.215136	0.0441786	327.565
0.236425	0.0170924	327.136
0.162268	-0.26444	324.679
0.231424	-0.264614	327.359
0.197026	-0.252507	329.675
0.32363	0.0700415	327.088
-0.0706299	-0.191757	401.39
-0.182417	-0.226067	405.948
0.0791802	0.165994	401.39
0.00555972	-0.0585373	401.39
0.0323548	0.0180126	401.39
0.143444	0.101748	401.39
0.15453	0.0421513	401.39
0.166763	0.132819	401.39
0.172149	0.115522	401.39
0.17548	-0.0140291	401.39
0.0388946	0.058511	403.898
0.0481541	0.0317024	403.858
0.0848292	0.00546904	403.693
0.129557	-0.298652	401.39
0.273027	0.150961	401.39
0.208719	0.0696752	401.39
0.225366	0.015397	401.39
0.293901	0.00919887	401.39
0.195704	0.144635	404.131
0.199033	-0.169217	401.39
-0.0866759	0.0241485	481.39
-0.136725	-0.12942	481.39
-0.131761	-0.244602	481.39
-0.123013	-0.119103	481.39
-0.106366	-0.216171	481.39
-0.0849656	-0.233894	481.39
-0.0762502	-0.139616	481.39
0.0618978	0.13972	481.39
0.112516	0.0835477	481.39
0.141741	0.0867698	481.39
0.154159	0.0775929	481.39
0.168323	0.117355	481.39
0.179408	0.132405	481.39
0.0541581	-0.183421	481.39
0.115529	-0.283521	481.39
0.119444	-0.265446	481.39
0.185374	-0.0574468	481.39
0.211425	0.178072	481.39
0.195675	0.153888	481.39
0.199953	0.0299336	481.39
0.218066	0.0612901	481.39
0.295064	0.131267	481.39
0.216393	-0.126916	481.39
0.284148	-0.0721346	481.39
-0.075242	-0.0140784	561.39
-0.0663477	-0.02759	561.39
0.0853676	0.148475	561.39
0.106634	0.181907	561.39
0.00602938	0.0536729	561.39
0.0439074	0.00329374	561.39
0.0638603	0.0815148	561.39
0.0763413	0.0146281	561.39
0.091184	0.126611	561.39
0.0937047	0.104748	561.39
0.0962407	-0.0722003	561.39
-0.0381181	-0.203981	561.39
0.108583	-0.264234	561.39
0.109842	-0.151149	561.39
0.135874	0.161682	561.39
0.175788	0.191133	561.39
0.194251	0.172621	561.39
0.196844	0.157123	561.39
0.237972	0.168591	561.39
0.241721	0.223781	561.39
0.129638	0.110466	561.39
0.139356	0.0889558	561.39
0.172461	0.0835861	561.39
0.202619	-0.0761894	561.39
0.239014	0.0497481	561.39
0.1396	-0.298066	561.39
0.209696	-0.356732	561.39
0.212527	-0.21813	561.39
0.30372	0.0760651	561.39
-0.0406774	-0.0297459	647.985
-0.165347	-0.259572	648.144
-0.118202	-0.224254	649.688
0.0923072	0.236193	647.533
0.0952056	0.0474989	641.39
0.040206	0.0273404	649.847
0.106449	0.0742156	649.209
0.127884	0.0620544	650.405
0.208347	0.116529	642.941
0.162435	0.115131	647.759
0.178834	0.154719	649.177
0.189526	0.0479375	641.39
0.319105	0.020344	641.39
0.212593	-0.0723428	643.962
0.216425	0.0716419	647.005
0.226492	-0.248	647.975
0.353424	-0.334192	641.39
0.368614	-0.322956	643.492
0.175671	0.186894	651.128
0.225589	0.171119	651.78
0.298626	0.128992	651.559
0.171818	-0.194206	652.189
0.254628	-0.341697	651.721
-0.163797	-0.00466405	727.255
-0.152942	0.0262277	725.942
-0.120637	-0.159039	730.546
0.117693	0.195801	727.554
0.180329	0.13997	728.213
0.0858391	0.201495	729.814
0.15851	0.105471	728.225
0.172567	-0.299204	729.873
0.229378	-0.206785	730.013
0.255305	0.127628	734.558
0.249776	-0.302605	731.412
0.341568	-0.300095	732.465
-0.228657	0.180402	810.644
0.0954503	0.155024	801.39
0.10784	0.180857	801.39
0.156864	-0.0158765	801.39
0.162142	-0.0392596	801.39
0.1451	-0.0186277	803.347
0.155128	0.060542	806.793
0.248492	0.140379	807.021
0.285415	-0.0359913	801.39
0.323596	0.0463232	801.39
0.271654	-0.0196539	807.015
0.313263	0.0127735	807.947
0.207946	-0.21338	801.39
0.229904	-0.221585	801.39
0.221435	-0.297805	803.93
-0.300439	0.213929	881.39
0.194838	0.206792	881.39
0.201956	0.106326	881.39
0.222677	0.158609	881.39
0.227156	0.136008	881.39
0.129163	0.188958	883.825
0.164849	0.20914	886.738
0.0834602	0.129685	889.028
0.0341393	0.00808371	881.39
0.0595095	0.0300057	881.39
0.132934	0.058926	881.39
0.252074	0.158309	886.419
0.289584	0.235149	889.194
0.248065	-0.147887	881.39
0.256759	-0.0938676	881.39
0.286965	0.0584396	881.39
-0.152915	-0.0742518	892.88
-0.162898	-0.217444	967.605
0.107358	0.189482	967.934
0.107455	0.0222209	964.069
0.187344	0.242719	968.233
0.196856	0.168607	968.19
0.192275	0.189329	970.257
0.198958	0.202623	969.604
0.236602	-0.127902	961.39
0.203204	0.0750275	967.476
0.277211	0.102169	966.901
0.241507	-0.238681	961.39
0.218408	-0.19724	965.49
0.351107	0.00125149	970.981
-0.134227	-0.272567	975.161
0.175486	0.179307	971.577
-0.218788	-0.190362	1050.47
0.074623	0.184976	1041.39
0.110438	0.198698	1041.39
0.126717	0.0502499	1041.39
0.138838	0.0180228	1041.39
0.156625	-0.00665267	1041.39
0.186579	-0.106088	1041.39
0.22656	-0.01985	1041.39
0.233154	-0.123311	1041.39
0.307467	-0.108669	1041.39
0.222614	0.0555468	1048.66
-0.126315	-0.16174	1051.82
0.247454	-0.267874	1051.58
0.0718821	0.151454	1121.39
0.0997933	0.168181	1121.39
0.176073	0.216802	1121.39
0.194533	0.188769	1121.39
0.168828	0.154955	1125.51
0.2015	0.223492	1123.2
0.175094	0.189857	1126.48
0.182754	0.0545865	1121.39
0.189501	0.0733714	1125.32
0.20118	0.0999373	1121.39
0.204215	0.131401	1121.39
0.268369	0.190579	1121.39
0.284538	0.105254	1121.39
0.269532	0.128787	1130.28
0.21109	0.019738	1121.39
0.21273	-0.022664	1121.39
0.267046	0.0241607	1121.39
0.355997	-0.143337	1121.39
0.199867	0.067446	1124.6
0.281495	-0.266113	1121.39
0.25731	-0.237261	1128.22
0.249194	-0.284513	1129.65
-0.175202	-0.221175	1209.19
0.141844	0.159529	1201.39
0.160115	0.25119	1209.66
0.124043	0.0210871	1201.39
0.129711	-0.0566356	1201.39
0.0609245	-0.00163304	1204.53
0.0722317	-0.00034532	1203.22
0.171374	-0.0686625	1203.09
0.096875	-0.0732597	1205.59
0.123054	0.0505417	1206.44
0.143158	-0.0519275	1205.97
0.0465002	-0.105454	1209.98
0.111322	0.0376954	1209.65
0.154537	-0.0493905	1209.57
0.160543	-0.0319591	1209.57
0.208171	0.0143403	1201.39
0.231572	0.00807822	1205.41
0.257798	-0.0652722	1207.78
0.354794	-0.193742	1208.85
0.169611	0.108294	1218.07
0.271837	0.0394185	1212.63
0.292579	0.0331631	1212.01
0.307348	-0.00656012	1214.84
0.30063	-0.2694	1211.75
-0.0163219	0.0115255	1290.4
-0.172913	-0.162257	1284.53
-0.139616	-0.179247	1288.35
0.0896157	0.139723	1281.39
0.0969521	0.171333	1281.39
0.10263	0.110916	1287.34
0.205916	0.198985	1290.54
0.0349424	0.0156132	1281.39
0.0498496	-0.00310487	1281.39
0.0612128	0.0157673	1281.39
0.075271	-0.00108805	1281.39
0.079101	-0.0492933	1281.39
0.101532	-0.0175102	1281.39
0.125074	-0.047683	1281.39
0.134216	-0.045313	1281.39
0.181388	-0.00649325	1281.39
0.179948	-0.0437524	1281.39
0.15036	-0.113279	1284.97
0.0349985	-0.0498579	1287.05
0.137211	-0.0901388	1286
0.184164	0.0211068	1288.71
0.0960123	-0.189372	1285.22
0.114336	-0.15211	1289.4
0.237908	0.113127	1281.39
0.199072	-0.119066	1281.39
0.297852	0.0236138	1290.98
0.282497	-0.21929	1287.32
0.0279755	0.0467452	1293
0.109108	-0.199788	1292.49
0.076065	0.18992	1365.13
0.13819	0.190306	1364.89
0.152557	0.18744	1365.04
0.040544	0.0143393	1361.39
0.0660539	0.00848214	1361.39
0.138722	0.0851796	1361.39
0.0612268	-0.00606256	1364.05
0.245277	0.119373	1367.91
0.216071	-0.280607	1365.08
0.23223	-0.331178	1368.54
0.0875944	0.188056	1378.07
0.1013	0.00561149	1372.4
0.147575	0.00670583	1375.47
0.302779	0.0398157	1374.17
-0.0702047	-0.0465909	1451.11
0.153858	0.162036	1443.86
0.175111	0.220185	1444.54
0.112313	0.0638187	1444.18
0.0300195	0.00370787	1447.88
0.0557864	0.0230312	1448.73
0.192736	0.223546	1444.99
0.206256	0.111028	1450.33
0.213945	0.20468	1450.57
0.293115	-0.126693	1445.65
0.212854	0.0507487	1449.66
0.254823	-0.279234	1456.03
0.363641	-0.19124	1458.07
-0.0644243	0.00740626	1521.39
-0.0820677	-0.0914649	1529.44
-0.15262	-0.180513	1521.39
0.0445927	-0.0405419	1521.39
0.0464469	-0.0173026	1521.39
0.196385	0.106916	1521.39
0.0633947	0.0109829	1523.48
0.0883764	0.0837039	1523.08
0.127347	0.0879535	1523.54
0.0844388	0.0355566	1530.42
0.103052	0.080089	1530.91
0.131806	0.0313146	1528.72
0.287829	-0.345356	1527.78
0.381459	-0.207512	1529.39
-0.127644	-0.199664	1535.39
0.119434	0.075303	1531.15
0.230257	0.216315	1538.07
0.221648	-0.0179003	1534.96
0.296368	0.12353	1534.55
0.289272	-0.138787	1532.46
-0.272084	-0.245011	1601.39
-0.112358	-0.125466	1601.39
-0.134316	-0.150985	1606.58
0.0797496	0.167967	1601.39
0.050299	0.0223056	1601.39
0.0658263	0.0267178	1601.39
0.156502	0.110932	1601.39
0.167358	0.124461	1601.39
0.191456	0.124245	1601.39
0.213177	0.131584	1605.29
0.197941	0.0637738	1607.46
0.233985	0.163641	1607.27
0.239443	0.147541	1606.89
0.27905	0.0782848	1606.42
0.225491	-0.329952	1601.39
0.28012	-0.190199	1609.44
0.324138	-0.371842	1610.58
0.385649	-0.186602	1605.04
0.284381	0.0211246	1611.6
0.297608	-0.0371828	1613.16
0.302858	-0.2764	1611.64
-0.176423	-0.225579	1681.39
0.138005	0.161902	1681.39
0.045137	0.0275163	1681.39
0.0647038	-0.0430132	1681.39
0.109647	-0.0397256	1681.39
0.124655	-0.046858	1681.39
0.172651	-0.0308357	1685.23
0.0652158	0.0941953	1688.41
0.180721	0.148679	1689.87
0.277557	-0.0528063	1681.39
0.309588	-0.00634602	1681.39
0.27422	0.0117452	1686.94
0.238469	0.128223	1690.86
0.353766	-0.0143488	1690.75
0.229135	0.0534154	1691.71
0.317324	-0.158243	1698.07
-0.164906	-0.224055	1761.39
0.0388846	0.027921	1761.39
0.191717	0.199876	1761.39
0.0577505	0.0202579	1761.39
0.133515	0.0249331	1761.39
0.158039	0.105477	1761.39
0.170956	0.126563	1761.39
0.171857	0.0965585	1761.39
0.222671	0.136815	1761.39
0.245555	0.100977	1761.39
0.340094	-0.00131681	1763.05
0.317734	-0.130979	1761.39
0.129797	0.0711816	1841.39
0.14391	0.0613914	1841.39
0.11703	-0.0886757	1850.2
0.387605	0.0271731	1850.62
0.32171	-0.154047	1846.12
0.304448	-0.339117	1841.39
0.311809	-0.389506	1841.39
0.348785	-0.394206	1841.39
0.313109	-0.311974	1845.07
0.353568	-0.329524	1844.3
-0.232132	-0.117834	1921.39
-0.134721	-0.0497347	1921.39
-0.0729846	-0.026078	1928.87
0.191807	0.180655	1921.39
0.139616	0.0774121	1921.39
0.162327	0.012055	1921.39
0.174709	0.108748	1921.39
0.102436	0.157642	1929.83
0.283971	0.00718659	1929.21
0.297598	-0.148694	1921.39
0.336327	-0.375173	1930.84
0.427306	-0.130063	1929.56
0.337354	0.0141798	1931.22
0.339429	-0.0368345	1932.17

## Sheet: Sheet2
0.346763	-0.00429904	-1913.05
0.384562	-0.0137863	-1838.61
0.364058	-0.201181	-1027.49
0.341336	-0.105661	-955.83
0.338801	-0.260781	-958.61
0.290774	-0.335449	-950.27
0.336675	-0.242707	-787.49
0.309535	-0.270077	-795.83
0.361362	-0.350095	-787.49
0.338469	-0.364744	-784.71
0.336051	-0.315007	-713.05
0.291746	-0.172063	-638.61
0.275709	-0.288653	-630.27
0.352616	-0.276141	-635.83
0.383648	-0.31063	-630.27
0.388239	-0.344193	-630.27
0.291147	-0.165561	-555.83
0.279533	-0.129586	-478.61
0.28941	-0.162671	-478.61
0.313975	-0.132934	-478.61
0.372932	-0.233934	-467.49
0.275286	-0.0885909	-318.61
0.33063	-0.267724	-310.27
0.321873	-0.168011	-233.05
0.298156	-0.135315	-150.27
0.285012	-0.133224	-153.05
0.277096	-0.1504	-150.27
0.339459	-0.339047	-143.097
0.305733	-0.195605	12.51
0.354999	-0.255678	17.4001
0.387469	-0.330057	17.2544
0.277397	-0.0424319	92.51
0.296853	-0.13882	161.39
0.350535	-0.295377	164.17
0.290122	-0.0734331	321.39
0.288679	-0.0775583	401.39
0.259806	-0.0902023	401.39
0.279236	-0.117427	401.39
0.362387	-0.140198	403.245
0.139196	-0.266766	401.39
0.288695	-0.100784	646.95
0.279057	-0.137141	646.95
0.371377	-0.0899821	724.552
0.162708	-0.262664	801.39
0.151244	-0.303182	809.73
0.361918	-0.158025	961.82
