# Supplementary material for: Spinal premotor interneurons controlling antagonistic muscles are spatially intermingled
Source: eLife. 2022 Dec 13;11:e81976. doi: 10.7554/eLife.81976 (PMC9844990; doi:10.7554/eLife.81976)
Supplement: Figure 12—figure supplement 1—source data 2. [file elife-81976-fig12-figsupp1-data2.xlsx]

## Sheet: Sheet1
0.131748	0.130991	-1600.16
0.188421	0.0662965	-1599.12
0.282379	-0.129321	-1578.57
-0.108746	-0.141578	-1582.91
-0.147882	-0.0953903	-1596.01
-0.227255	-0.24682	-1584.91
0.351692	-0.248042	-1570.58
0.0982611	0.237386	-1515.83
0.0975896	0.162718	-1515.83
0.198323	0.0702099	-1510.27
0.0431411	0.0362892	-1518.61
0.29768	0.01599	-1510.27
-0.147082	-0.218969	-1430.27
0.235924	0.173493	-1433.05
0.152908	0.164213	-1430.27
0.0450452	0.0515448	-1438.61
0.0745566	0.00565271	-1427.49
0.288824	-0.178879	-1427.49
-0.199905	-0.185186	-1344.71
0.0872814	0.1699	-1350.27
0.105683	0.142353	-1344.71
0.0958151	0.224481	-1350.27
0.252132	-0.0355852	-1344.71
0.293677	-0.152842	-1344.71
0.193813	0.175627	-1347.49
0.302523	0.118706	-1350.27
0.279439	0.0568984	-1347.49
0.147702	0.0588777	-1355.83
0.160045	0.145441	-1353.05
0.101855	0.0437257	-1358.61
-0.26177	0.225393	-1350.27
0.339149	-0.198326	-1350.27
0.318836	-0.360754	-1347.49
-0.300581	0.12581	-1273.05
0.138649	0.224252	-1275.83
0.128423	0.0718891	-1275.83
0.123721	0.0997707	-1270.27
0.157147	0.16854	-1273.05
0.206121	0.119288	-1275.83
0.280165	0.0580802	-1270.27
0.234196	-0.198452	-1270.27
0.215591	-0.334664	-1273.05
0.239198	0.121892	-1275.83
-0.206924	-0.264431	-1195.83
-0.171038	-0.230809	-1198.61
0.10288	0.111254	-1195.83
0.133735	0.105604	-1198.61
0.158312	0.104395	-1195.83
0.21415	0.168138	-1195.83
0.112547	0.172559	-1187.49
0.100148	0.193664	-1193.05
0.0789333	0.24707	-1195.83
0.136011	0.0425589	-1193.05
0.193541	-0.000274918	-1195.83
0.170311	-0.00881644	-1198.61
0.237256	-0.0134223	-1190.27
0.320553	0.0182792	-1187.49
0.343264	0.162193	-1190.27
0.224386	-0.0340966	-1195.83
0.208996	0.147356	-1113.05
0.112079	0.173095	-1115.83
0.157394	0.114669	-1115.83
0.199788	0.0677424	-1115.83
0.278946	0.0236205	-1110.27
0.344297	-0.00225766	-1110.27
-0.248741	0.120509	-1113.05
0.352885	-0.148036	-1113.05
0.0800039	0.225954	-1118.61
0.138206	0.219771	-1113.05
0.14609	0.224507	-1113.05
0.157463	-0.14204	-1115.83
0.203394	-0.332165	-1115.83
0.349891	-0.122458	-1113.05
0.323111	-0.128304	-1107.49
0.370461	-0.31748	-1104.71
-0.256805	0.23997	-1038.61
-0.132061	-0.219856	-1033.05
-0.061303	-0.193498	-1027.49
-0.000625686	-0.073698	-1033.05
0.215564	-0.201517	-1027.49
0.221135	-0.275277	-1033.05
0.297638	-0.212165	-1030.27
0.263947	-0.0434233	-1030.27
0.221108	-0.0910351	-1033.05
0.22598	-0.131013	-1035.83
0.341321	-0.0913569	-1035.83
0.225045	-0.0223817	-1030.27
0.222255	-0.0425466	-1033.05
0.188594	0.0490791	-1030.27
0.196528	0.0108663	-1035.83
0.173308	0.039035	-1030.27
0.106017	0.0253141	-1035.83
0.265867	0.0936563	-1027.49
0.244202	0.158999	-1030.27
0.195581	0.152346	-1033.05
0.172345	0.228419	-1027.49
0.104223	0.203058	-1033.05
0.0790106	0.194048	-1027.49
-0.106856	-0.0333059	-950.27
-0.0037684	-0.105074	-950.27
0.00429418	-0.0929701	-950.27
0.26355	-0.166499	-953.05
0.318655	-0.166432	-947.49
0.240843	-0.0958543	-953.05
0.199438	-0.0883639	-955.83
0.210704	0.00180621	-953.05
0.262208	-0.0263716	-955.83
0.306966	0.0639755	-953.05
0.351455	0.0695585	-953.05
0.185343	0.0863748	-955.83
0.141338	0.0247287	-953.05
0.152618	0.113732	-955.83
0.165093	0.126548	-953.05
0.105166	0.158507	-953.05
0.151858	0.221061	-953.05
0.225416	-0.323491	-953.05
0.0362856	0.0354352	-955.83
0.129226	0.17878	-867.49
0.124138	0.112418	-873.05
0.132779	0.0726566	-873.05
0.0950311	0.0681646	-873.05
0.0683737	0.176255	-873.05
-0.147082	-0.0805088	-870.27
-0.133424	-0.154074	-870.27
-0.0607512	-0.140353	-873.05
-0.124481	-0.20036	-873.05
-0.228941	-0.141038	-875.83
0.227853	-0.210297	-873.05
0.239185	-0.180544	-867.49
0.253201	-0.0511292	-870.27
0.312786	0.00784613	-870.27
0.242513	-0.313297	-867.49
0.216002	-0.366563	-870.27
0.215829	-0.0130832	-873.05
-0.0759361	0.0875588	-873.05
-0.116609	0.00639758	-870.27
0.0211205	0.000435473	-870.27
0.177799	-0.108249	-873.05
0.136933	0.154297	-870.27
-0.0032436	0.0836526	-875.83
0.133949	0.150124	-793.05
0.161007	0.150728	-793.05
0.173276	0.104115	-793.05
0.173197	0.0873609	-790.27
0.165202	0.0561318	-793.05
0.128549	0.0439151	-795.83
0.277268	0.0137703	-790.27
-0.0879789	-0.00782144	-790.27
0.252721	-0.145077	-790.27
0.188803	-0.313841	-793.05
0.21171	-0.342732	-795.83
0.326697	-0.33282	-790.27
-0.15559	-0.189535	-793.05
0.247946	-0.157733	-707.49
0.222667	-0.148861	-707.49
0.00865293	-0.0815705	-710.27
-0.176528	-0.230239	-707.49
-0.153776	-0.17026	-707.49
0.322764	0.0512347	-713.981
0.297809	0.0390492	-717.058
0.17341	0.0376609	-713.05
0.1577	0.0731931	-710.27
0.0970565	0.185366	-713.05
0.255708	0.225249	-712.973
0.119942	0.266118	-711.294
0.0100039	-0.0273991	-710.27
-0.0513294	0.00768255	-710.27
0.200682	-0.344044	-708.545
0.242215	-0.336439	-707.808
0.290004	-0.260262	-706.978
0.0919713	0.0950803	-715.83
0.0915102	0.0870907	-715.83
0.0956271	0.144311	-713.05
0.222131	0.0878972	-715.697
0.243349	0.185289	-712.271
0.0777541	0.165205	-638.61
0.0978984	0.0696016	-638.208
0.109709	0.0520948	-637.84
0.141481	0.0559109	-638.008
0.169191	-0.0158973	-637.15
0.221951	0.0209549	-637.557
0.220664	0.0353454	-637.032
0.280405	0.0545821	-637.002
0.210451	0.21425	-638.61
0.148272	0.232111	-638.61
0.179789	0.239813	-638.61
0.169311	0.137274	-638.61
0.155459	0.105137	-636.349
0.37754	-0.0685806	-634.162
0.221175	-0.0370219	-637.406
0.216077	-0.0282748	-637.042
0.285919	-0.0755259	-635.565
0.234088	-0.16555	-637.678
0.217863	-0.20035	-637.458
0.234155	-0.333663	-637.642
0.349989	-0.306728	-635.956
0.295256	-0.256284	-638.307
0.25789	-0.184752	-638.482
0.210256	0.155141	-638.61
0.149249	0.131826	-638.61
0.180565	0.121498	-547.477
0.187295	0.101172	-547.476
0.204169	0.0994261	-550.255
0.206673	0.0706249	-550.255
0.239642	0.0146202	-547.472
0.218606	-0.000566061	-553.034
0.196717	-0.00870132	-547.476
0.269605	0.0387663	-550.25
0.142089	0.0610905	-553.04
0.0711922	0.0718623	-553.045
-0.00558349	0.0774668	-550.27
-0.126055	-0.169625	-550.279
0.21001	-0.117482	-550.255
0.217884	-0.281656	-547.474
0.214877	-0.307528	-550.254
0.276558	-0.294115	-547.47
0.268142	-0.348394	-550.251
0.273881	-0.252744	-547.47
0.286228	-0.0622894	-550.249
0.296858	-0.0534115	-550.248
0.0453128	-0.0866949	-553.047
0.217241	-0.331326	-547.474
0.233758	-0.365408	-550.253
0.289968	-0.177741	-550.249
0.252914	-0.133017	-550.252
0.210592	0.210702	-470.27
0.258585	0.222761	-470.27
0.22939	0.23578	-470.27
0.220358	0.12126	-473.05
0.223281	0.0697822	-467.49
0.241101	0.071136	-470.27
0.170503	0.0994667	-473.05
0.174306	0.0739775	-473.05
0.160577	0.0264271	-473.05
0.112586	0.0482715	-473.05
0.0786403	0.0609116	-473.05
0.081309	0.117193	-467.49
0.0897444	0.153785	-467.49
0.132627	0.134035	-467.49
0.00227504	0.0485997	-470.27
-0.104406	-0.206663	-470.27
0.126301	-0.0556361	-473.05
0.176624	0.125755	-467.49
0.21901	-0.205296	-470.27
0.246471	-0.162923	-467.49
0.250596	-0.342371	-470.27
0.221127	-0.148943	-473.05
0.209504	0.00734102	-473.05
0.235151	-0.147636	-470.27
0.0766936	0.0440058	-473.05
0.185258	0.166583	-390.27
0.184024	0.0973189	-387.49
0.146373	0.0820909	-390.27
0.136637	0.0607159	-390.27
0.112237	0.11812	-395.83
0.0871721	0.106658	-387.49
0.0890202	0.0930668	-393.05
0.0626282	0.0230609	-390.27
0.0567763	0.0286676	-395.83
-0.102687	-0.157182	-390.27
-0.0885298	-0.196585	-387.49
-0.140786	-0.21143	-384.71
-0.0560493	-0.156177	-384.71
-0.0480808	-0.119733	-390.27
0.115824	-0.167312	-393.05
0.182575	-0.213485	-384.71
0.198306	-0.229704	-384.71
0.206888	-0.284504	-390.27
0.201843	-0.31128	-390.27
0.27741	-0.384442	-384.71
0.251635	-0.0569099	-393.05
0.178198	-0.00322376	-390.27
0.138566	-0.0317496	-384.71
0.248866	0.0334088	-387.49
0.309717	0.0348391	-387.49
0.277034	0.0707481	-390.27
0.317285	0.0744521	-390.27
0.248998	0.105431	-390.27
0.22627	0.106325	-393.05
0.216332	0.13966	-387.49
0.0179472	-0.0075441	-395.83
0.0103586	-0.0133498	-398.61
0.0962907	0.0292311	-395.83
0.206738	-0.285892	-310.27
0.265716	-0.333047	-304.71
0.254544	-0.36761	-301.93
0.341004	-0.357285	-304.71
0.324127	-0.312974	-310.27
0.316009	-0.0647451	-301.93
0.321658	-0.0261554	-310.27
0.325669	-0.0108168	-301.93
0.19451	-0.0634313	-313.05
0.152403	-0.157759	-304.71
0.152266	0.0191472	-310.27
0.131959	0.0552681	-307.49
0.14035	0.120954	-315.83
0.13452	0.0943132	-304.71
0.149077	0.0801729	-304.71
0.195343	0.119259	-310.27
0.211824	0.189856	-310.27
0.219362	0.188632	-310.27
0.260362	0.10102	-310.27
0.103379	0.166693	-307.49
0.0759995	0.165163	-313.05
0.0553576	0.157268	-313.05
0.0305513	0.044444	-310.27
0.0501997	0.0230057	-313.05
0.0168385	-0.00737514	-315.83
0.00521727	-0.0891602	-307.49
-0.118505	0.0369241	-313.05
0.372123	-0.308341	-313.05
0.0748485	0.0379326	-301.93
0.166874	0.100988	-307.49
0.242125	0.132356	-235.83
0.233113	0.0497835	-235.83
0.199698	0.115117	-238.61
0.193466	0.133834	-238.61
0.136655	0.17991	-235.83
0.106128	0.16345	-233.05
0.0745427	0.152996	-230.27
0.140476	0.0633524	-235.83
0.178006	0.185339	-235.83
0.216622	0.133411	-238.61
0.206014	0.101216	-235.83
0.0633171	-0.0015129	-233.05
-0.0484627	-0.0616139	-224.71
-0.0755716	-0.16069	-238.61
0.231581	-0.140494	-235.83
0.284073	-0.168652	-235.83
0.269021	-0.3222	-235.83
0.215709	-0.14489	-238.61
0.039313	-0.0401533	-233.05
0.0461834	0.0130093	-235.83
-0.0340859	-0.0880336	-144.71
-0.0399128	-0.135511	-150.27
-0.00460128	-0.123401	-155.83
0.00461533	-0.0965015	-155.83
-0.00478344	-0.0663435	-155.83
-0.119647	-0.203912	-155.83
0.0627489	-0.00121919	-158.61
0.0324838	0.0440277	-155.83
0.000761862	0.0467727	-150.27
0.0973706	0.0829369	-158.61
0.0817489	0.10765	-153.05
0.09849	0.11235	-155.83
0.0802562	0.13811	-150.27
0.0529434	0.142767	-153.05
0.168313	0.0964493	-158.61
0.181371	0.131693	-155.83
0.213262	0.180973	-153.05
0.236446	0.170668	-144.71
0.200786	0.0811194	-155.83
0.203254	0.0604435	-150.27
0.22026	0.0526499	-147.49
0.220195	0.0370604	-155.83
0.185991	0.0326275	-153.05
0.197087	0.00759827	-155.83
0.225368	-0.22111	-153.05
0.236907	-0.227653	-147.49
0.188592	-0.200238	-155.83
0.218374	-0.11577	-153.05
0.209593	-0.180991	-155.83
0.046331	-0.0152332	-147.49
0.289995	-0.160556	-70.27
0.301463	-0.274769	-73.05
0.22514	-0.298699	-73.05
0.232808	-0.330659	-67.49
0.220265	-0.151389	-67.49
0.195227	-0.0818833	-73.05
0.234494	-0.0275004	-70.27
0.229986	0.123059	-73.05
0.222127	0.129471	-64.71
0.157617	0.184257	-73.05
0.119908	0.134943	-70.27
0.125726	0.121061	-73.05
0.146687	0.14394	-64.71
0.0674179	0.118603	-67.49
0.0765041	0.0930458	-73.05
0.0925183	0.0966897	-70.27
0.0849356	-0.0148029	-73.05
0.109434	-0.0108992	-73.05
0.0573345	-0.072734	-78.61
-0.166318	-0.0510349	-78.61
-0.102017	-0.100979	-64.71
0.0986876	0.132917	-64.71
0.132092	0.146271	-64.71
0.125653	0.198278	-64.71
0.0660864	0.237922	-70.27
0.163004	0.0601027	-70.27
0.168241	-0.0812838	-75.83
0.0775457	-0.0436512	-73.05
0.0517418	0.221757	-64.71
0.0673667	0.168766	1.39001
0.10572	0.102571	9.73
0.120697	0.0559817	9.73
0.0872137	0.0548649	4.17
0.0209171	0.0517483	4.17
0.138139	0.00911954	1.39
0.170043	0.0844313	1.39
0.192503	0.0903187	12.51
0.225874	0.0274232	15.29
0.287168	0.0145789	9.73
0.316193	-0.104663	4.17
0.266792	-0.146875	12.51
0.223756	-0.165556	9.72999
0.110224	-0.0538079	4.17
0.136655	-0.054578	12.51
-0.070979	-0.137998	12.51
0.286399	-0.373765	9.72999
0.314499	-0.218426	15.29
0.189464	0.139794	86.95
0.160553	0.0967859	86.95
0.198193	0.0479203	84.17
0.276755	0.07728	89.73
0.241902	0.00474722	86.95
0.302342	-0.0292438	92.51
0.212206	-0.0800114	84.17
0.233697	-0.0844694	89.73
0.118437	0.173585	84.17
0.0821864	0.0394696	86.95
0.0736397	0.0648336	92.51
0.0118603	0.0404212	81.39
0.075902	-0.0950855	81.39
-0.0605508	-0.165546	92.51
-0.134993	-0.178276	89.73
-0.0508245	-0.0644053	92.51
0.227055	-0.315874	89.73
0.219007	0.130826	172.51
0.126137	0.117377	164.17
0.124327	0.0624601	161.39
0.105232	0.0450599	166.95
0.164318	0.00099354	172.51
0.203775	0.0428449	166.95
0.264759	0.0347125	166.95
0.241705	0.130508	175.29
0.171384	0.171257	161.39
0.19012	0.205656	166.95
0.243564	0.198904	169.73
0.189642	-0.258638	164.17
0.24869	-0.343079	164.17
0.277514	-0.30691	166.95
0.34516	-0.233275	169.73
-0.0867878	-0.102329	172.51
0.230559	-0.161419	161.39
0.198225	0.0720596	246.95
0.207659	0.0307353	249.73
0.226175	-0.0155177	249.73
0.276587	-0.100319	244.17
0.308053	-0.290933	249.73
0.0290353	0.0227463	244.17
0.107938	0.144023	246.95
0.149259	0.131352	241.39
0.11523	0.104249	244.17
0.120946	0.095233	241.39
0.147128	0.0669888	241.39
-0.135362	-0.15627	246.95
-0.0984474	-0.170952	252.51
0.197745	0.114041	326.951
0.173906	0.119352	324.171
0.164283	0.104045	326.951
0.135179	0.107755	332.511
0.0708807	0.136713	321.391
0.0907092	0.162452	332.511
0.1737	0.211775	332.511
0.123361	0.160929	321.391
0.0275698	0.0837668	329.731
0.0501627	0.0141648	321.391
0.0431623	-0.000989845	321.391
0.00550405	-0.0691295	329.731
0.106917	0.0528511	326.951
0.126788	0.0293616	326.951
0.12153	-0.0250835	329.731
0.282768	0.0494455	326.951
0.374818	-0.069324	326.951
0.397711	-0.143534	326.951
0.285422	-0.166627	324.171
0.248967	-0.208247	324.171
0.280558	-0.342959	324.171
0.230232	-0.191204	324.171
0.255568	-0.106547	332.511
0.12751	-0.0964504	321.391
0.217731	0.091317	329.731
-0.0182114	-0.0431852	400.784
0.12133	0.149381	398.004
0.202383	0.128617	398.004
0.204393	0.0968957	395.224
0.230455	0.0927004	398.004
0.288957	0.0247684	398.004
0.281284	0.0196893	395.224
0.314201	-0.0366132	398.004
0.195396	0.0370361	400.784
0.240241	-0.187642	395.224
0.0981239	-0.0323928	395.224
0.113654	0.0393273	395.224
0.00186339	0.0337202	395.224
0.192539	-0.31254	395.224
0.309355	0.0303767	395.224
0.187633	-0.0298671	395.224
0.216082	-0.0246581	395.224
0.0888937	0.0730494	395.224
0.0463932	0.0403079	398.004
0.0625333	0.0105877	398.004
0.0985336	0.0106386	395.224
0.219649	0.0775906	486.95
0.220652	0.0652132	489.73
0.184531	0.109989	495.29
0.0964001	0.193505	492.51
0.0637642	0.116059	486.95
0.0871997	0.0819386	484.17
0.182595	-0.225581	490.034
0.158558	-0.0844587	492.51
0.259354	-0.350662	489.76
0.0617386	0.00894787	489.73
0.0697103	0.0148052	486.95
0.131181	-0.00138027	492.51
-0.066327	0.015641	482.875
0.182645	0.0763588	575.29
0.223288	0.0313481	575.29
0.21341	0.0813652	578.07
0.162756	0.0314011	566.95
0.291475	-0.0165795	576.01
0.138515	-0.0809274	578.07
0.0960303	0.148851	575.29
0.149126	0.110463	578.07
0.156992	0.115112	578.07
0.162126	0.0539901	566.95
0.213494	-0.0340383	578.07
0.156276	-0.0266418	569.73
0.14646	0.098544	575.29
0.150982	0.0917728	566.95
0.157124	0.0936903	569.73
0.116225	0.0888991	572.51
-0.118831	-0.207032	568.623
-0.0993335	-0.0863344	649.73
-0.0575882	-0.00382574	646.95
0.0545986	-0.00868734	646.95
0.0448879	-0.0243102	652.51
0.15752	0.105442	649.73
0.0767852	0.0212089	652.51
0.208746	0.0404739	649.73
0.198337	0.0849843	658.07
0.288344	0.00534876	652.447
0.0524488	0.0393605	649.73
0.0908017	-0.0432869	649.73
-0.0978729	-0.0103016	646.95
-0.208782	-0.0292641	721.816
-0.0783566	-0.13356	721.434
0.264432	-0.338605	726.007
0.28768	-0.0806315	729.729
0.324116	-0.0629513	732.51
0.313621	0.0409145	726.949
0.276269	0.0356604	729.729
0.190479	0.0317684	724.169
0.167867	0.105287	724.169
0.115897	0.263051	727.261
0.14606	0.160461	725.329
0.192819	0.123103	729.729
0.140743	0.0799368	729.729
0.152931	0.0211718	735.289
0.0770308	0.0965368	729.729
-0.113536	0.053996	730.02
0.199581	-0.0235628	812.51
0.11015	-0.0321121	809.73
0.0398808	-0.0196799	804.17
0.00573736	-0.0245935	801.39
-0.0822682	-0.0740909	815.29
0.0719439	0.187205	809.73
0.118334	0.212173	806.95
0.164141	0.126196	815.29
0.226721	0.147399	809.73
0.224004	0.198784	804.17
0.214672	0.134305	806.95
0.223469	0.120014	806.95
0.174432	0.0726688	804.17
0.11323	0.0055527	806.95
0.102132	0.0347644	804.17
0.304756	-0.022386	809.73
0.285389	0.0390148	801.39
0.268377	-0.338202	813.339
-0.0197129	-0.0829663	812.51
-0.134569	-0.187487	806.95
0.222893	-0.165332	881.39
0.146265	-0.136359	889.73
0.182016	-0.268208	889.512
0.176776	-0.0870457	889.73
0.145705	-0.0521464	886.95
0.141776	-0.000389715	884.17
0.159714	0.0673005	881.39
0.171696	0.0721066	884.17
0.146921	0.0918264	886.95
0.199718	0.148858	892.51
0.0525125	0.0983631	881.39
-0.105994	-0.168956	887.764
0.310295	-0.0780197	967.631
0.25848	-0.147101	964.17
0.24659	-0.147623	961.39
0.126753	0.152812	964.17
0.0727869	0.159834	969.73
0.104597	0.088745	961.39
0.136898	0.0840169	961.39
0.187949	0.138741	964.17
0.148173	0.123208	961.39
0.239479	-0.145461	1049.73
0.27618	0.0797154	1049.73
0.294399	0.0559606	1048.6
0.308447	0.0369177	1043.26
0.30488	0.120674	1046.66
0.19839	0.153285	1044.17
0.192197	0.0367314	1041.39
0.15643	0.0664226	1044.17
0.127514	0.0564138	1044.17
0.143348	0.0773141	1041.39
0.0561293	0.029881	1044.17
0.113507	0.0629655	1049.73
0.165471	0.0369235	1041.39
0.0561164	-0.0260054	1044.17
0.300895	-0.0362884	1135.29
0.261434	-0.153056	1129.73
0.267691	-0.351079	1134.12
0.0570786	0.0177581	1129.73
0.10696	0.107443	1124.17
0.193795	0.167678	1126.95
0.275694	0.025891	1132.51
-0.13505	-0.180341	1132.4
-0.129984	-0.208247	1131.53
0.028655	0.00787624	1124.17
0.234814	-0.0381976	1124.17
0.137855	0.0257017	1124.17
0.115534	0.135565	1124.17
0.23191	0.111922	1201.39
0.174542	0.118246	1212.51
0.16077	0.110776	1204.17
0.16694	0.171573	1209.73
0.138931	-0.112916	1209.73
0.239927	-0.306507	1216.55
-0.0647489	-0.179913	1206.95
-0.0612941	-0.117166	1209.73
-0.226272	-0.0387123	1215.92
0.155084	-0.0783408	1286.95
0.238255	-0.156523	1281.39
0.202568	-0.0114492	1289.73
0.197933	0.0245472	1289.73
0.173178	0.173593	1284.17
0.0672894	0.00701342	1289.73
0.164439	0.16592	1289.73
0.331665	-0.176823	1287.48
0.179862	0.173642	1364.17
0.161534	0.117975	1366.95
0.141218	0.145502	1361.39
0.0877386	0.114213	1361.39
0.0767421	0.193336	1364.17
0.170589	0.0865579	1364.17
-0.251059	0.0249474	1361.39
-0.0774441	-0.192714	1366.95
0.125979	0.00136463	1369.73
0.241949	0.202765	1449.54
0.201721	0.113891	1446.95
0.177613	0.0743987	1446.95
0.145105	0.0138043	1444.17
0.107852	0.108264	1446.95
0.197555	-0.166299	1446.95
-0.0963067	0.0212428	1446.95
-0.157389	-0.217961	1453.56
-0.106311	-0.120843	1451.26
-0.174642	0.079313	1451.42
-0.119597	0.212417	1442.1
0.197802	-0.000782305	1449.74
-0.130609	-0.037221	1528.81
-0.18775	0.170612	1530.28
-0.227928	0.0898512	1527.83
0.129576	-0.00520948	1524.17
0.189353	0.0498588	1529.73
0.235479	-0.136816	1529.73
0.294145	-0.120891	1532.51
0.235591	0.12727	1532.51
0.142149	0.116895	1526.95
0.142933	0.0765978	1529.73
0.209294	0.139363	1526.95
-0.159843	0.2601	1608.35
0.00253525	-0.0475848	1601.39
-0.12161	-0.210243	1606.95
-0.182647	-0.112135	1612.51
0.179435	-0.0702639	1601.39
0.168891	0.0715208	1601.39
0.220176	0.0740488	1604.17
0.239862	0.101111	1694.56
0.193956	-0.0123241	1686.95
0.162585	-0.015176	1689.73
0.130464	0.0282208	1684.17
0.0844337	0.139805	1686.95
0.32938	-0.148364	1688.3
0.0775872	0.0400518	1684.17
0.0505842	0.00629447	1686.95
0.168809	0.0925128	1763.36
0.248141	0.14226	1767.34
0.136906	0.0669217	1761.92
0.114804	0.0434274	1772.99
0.117192	0.0236379	1769.73
0.23043	-0.10916	1772.51
0.266443	-0.17434	1769.73
0.297866	-0.156402	1772.51
0.0300666	0.0130792	1764.17
-0.141416	0.222321	1841.96
0.0769092	0.1498	1841.7
-0.13947	-0.221002	1843.63
0.200659	-0.116458	1841.39
0.252369	0.153174	1847.06

## Sheet: Sheet2
0.36107	-0.0842485	-1033.05
0.360565	-0.275603	-1033.05
0.329624	-0.246576	-953.05
0.271595	-0.148279	-867.49
0.363249	-0.219091	-873.05
0.372441	-0.211962	-873.05
0.305289	-0.358739	-793.05
0.340049	-0.265591	-790.27
0.391672	-0.255217	-707.929
0.381383	-0.290152	-709.815
0.345955	-0.207365	-638.427
0.302342	-0.106526	-638.235
0.300765	-0.108802	-547.468
0.346133	-0.278036	-547.465
0.268993	-0.151324	-547.47
0.304788	-0.217581	-467.49
0.278393	-0.0863318	-467.49
0.373104	-0.219715	-470.27
0.324991	-0.303109	-470.27
0.354409	-0.234943	-393.05
0.330421	-0.334663	-384.71
0.359	-0.347819	-390.27
0.305281	-0.127441	-313.05
0.284348	-0.136419	-304.71
0.282031	-0.157187	-307.49
0.338143	-0.253511	-313.05
0.271516	-0.139399	-153.05
0.347369	-0.336136	-147.49
0.262508	-0.150034	-64.71
0.368069	-0.338668	-73.05
0.278726	-0.104397	4.17
0.294989	-0.130928	169.73
