# Supplementary material for: Spinal premotor interneurons controlling antagonistic muscles are spatially intermingled
Source: eLife. 2022 Dec 13;11:e81976. doi: 10.7554/eLife.81976 (PMC9844990; doi:10.7554/eLife.81976)
Supplement: Figure 12—figure supplement 1—source data 3. [file elife-81976-fig12-figsupp1-data3.xlsx]

## Sheet: Sheet1
0.361868	-0.147897	-2789.86
0.340567	-0.0064503	-2789.37
0.406303	-0.188244	-2782.85
0.261048	0.0339405	-2783.93
0.291612	0.194408	-2783.47
0.270716	0.193791	-2782.99
0.267008	0.207829	-2784.04
0.19773	0.0319157	-2787.64
0.152317	0.110345	-2790.34
0.117288	0.076992	-2789.61
0.0692393	0.0536697	-2791.93
0.181427	0.0915813	-2784.98
0.159776	0.0808439	-2787.02
0.157961	0.120665	-2786.66
0.125808	0.123719	-2786.87
0.11486	0.110281	-2788.03
0.104443	0.0910162	-2786.95
0.0737525	0.112903	-2788.91
0.0579262	0.212548	-2788.56
0.060404	0.0836478	-2786.37
-0.00866768	0.0776271	-2788.64
-0.214651	-0.223256	-2798.91
-0.226603	-0.239662	-2797.63
-0.145738	-0.203442	-2803.86
-0.147538	-0.19196	-2803.81
-0.176589	-0.195168	-2802.69
-0.215155	-0.0114987	-2800.84
-0.178915	-0.162647	-2798.29
-0.187807	0.0432609	-2794.38
-0.223846	0.0310338	-2793.68
-0.0521916	0.0796149	-2796.36
-0.0816897	0.18311	-2797.01
-0.196563	0.217697	-2794.89
-0.25504	-0.318042	-2800.92
-0.347673	-0.0589509	-2800.18
-0.251976	0.157065	-2800.16
-0.255942	0.12101	-2799.24
-0.291969	0.09391	-2801.1
-0.269561	0.113959	-2799.29
-0.290769	0.107843	-2798.68
0.364638	-0.251715	-2718.38
0.367413	-0.181053	-2718.38
0.2909	0.0135224	-2718.38
0.236906	0.0559511	-2718.38
0.384197	-0.175618	-2711.52
0.272425	-0.023467	-2710.17
0.261242	0.0281113	-2709.65
0.211031	0.0377744	-2709.82
0.387294	0.0697932	-2718.38
0.367913	0.102111	-2718.38
0.335706	0.095982	-2718.38
0.280237	0.129908	-2718.38
0.26628	0.109037	-2718.38
0.260569	0.0599036	-2718.38
0.227062	0.06961	-2718.38
0.298793	0.103423	-2714.3
0.293998	0.134968	-2715.62
0.271165	0.102881	-2715.69
0.267739	0.131034	-2716.03
0.301282	0.0733187	-2711.18
0.0879167	0.0338103	-2718.38
0.0872749	0.026977	-2718.38
0.0769344	0.0354809	-2718.38
0.0503665	0.0306116	-2712.43
0.125743	0.165643	-2718.38
0.0304591	0.107598	-2718.38
0.0162517	0.114454	-2718.38
0.0120993	0.126027	-2718.38
0.00573425	0.0592595	-2718.38
-0.0233198	0.279568	-2718.38
0.106432	0.0862695	-2713.89
0.0950024	0.101377	-2714.04
0.0887217	0.182761	-2711.29
0.124207	0.0897741	-2708.94
-0.02156	0.295692	-2718.38
-0.21899	-0.0496133	-2718.38
-0.121364	-0.113459	-2708.7
-0.0522774	0.0740447	-2718.38
-0.0690886	0.157792	-2718.38
-0.0723443	0.163784	-2718.38
-0.103941	0.110177	-2718.38
-0.176062	0.186867	-2718.38
-0.189938	0.18076	-2718.38
-0.20714	0.173331	-2718.38
-0.0807712	0.0748595	-2711.92
-0.144844	0.0945882	-2708.24
-0.310113	-0.252081	-2712.82
-0.279031	0.0130032	-2709.84
0.319729	-0.248634	-2638.38
0.382038	-0.114291	-2638.38
0.316982	0.0450746	-2638.38
0.301233	0.083318	-2638.38
0.285341	0.0763245	-2638.38
0.340084	-0.0300899	-2636.44
0.224696	0.0159198	-2633.81
0.235664	0.139311	-2638.38
0.213797	0.138271	-2638.38
0.24463	0.199673	-2633.83
0.19854	0.0673755	-2638.38
0.16691	0.0362078	-2638.38
0.115916	0.0786422	-2638.38
0.0508099	0.0366149	-2638.38
0.136962	0.118466	-2638.38
0.126325	0.103217	-2638.38
0.0593271	0.106326	-2638.38
0.045696	0.176817	-2638.38
0.0333229	0.128025	-2638.38
0.0282234	0.154736	-2638.38
0.0209662	0.133	-2638.38
0.119417	0.161797	-2633.62
0.0969365	0.103203	-2635.84
0.0785035	0.259191	-2633.59
0.0473142	0.1424	-2635.97
-0.07729	-0.187237	-2638.38
-0.140525	-0.184331	-2635.63
-0.0764121	-0.0817953	-2638.38
-0.0978594	-0.136343	-2638.38
-0.170712	-0.0858393	-2638.38
-0.0630515	-0.128719	-2635.41
-0.217039	0.0444657	-2632.15
-0.0408768	0.233423	-2638.38
-0.0524733	0.135216	-2638.38
-0.228324	-0.0841673	-2638.38
-0.308425	0.000337861	-2638.38
0.243124	-0.251927	-2558.38
0.303785	-0.281273	-2556.46
0.234382	-0.0407009	-2558.38
0.283124	-0.146573	-2551.58
0.302403	-0.0541133	-2547.65
0.255603	0.0323809	-2547.8
0.33661	0.159661	-2554.86
0.247602	0.131344	-2549.62
0.211509	0.0384238	-2558.38
0.201545	0.0260471	-2550.9
0.0332014	0.0405279	-2552.8
0.169482	0.0263352	-2549.69
0.0620628	0.0519206	-2548.47
0.150815	0.0949501	-2550.64
0.138666	0.197526	-2553.34
0.119664	0.204154	-2552.69
0.0586591	0.0720696	-2550.8
0.121463	0.133424	-2548.75
0.097693	0.0739825	-2547.15
-0.0988177	-0.132761	-2558.38
-0.107956	0.0448914	-2555.32
-0.0243581	0.0111177	-2548.9
-0.0779806	-0.0938459	-2549.52
-0.0469021	0.104904	-2555.74
-0.0644573	0.106167	-2556.7
-0.230704	-0.243352	-2550.18
-0.244359	-0.128593	-2558.38
0.075814	0.0508801	-2546.85
0.258657	-0.262011	-2475.36
0.348335	-0.15442	-2478.38
0.329152	0.0446089	-2478.38
0.320752	0.0651184	-2478.38
0.288473	-0.0126956	-2478.38
0.250414	-0.0562697	-2478.38
0.244468	0.0203319	-2478.38
0.339038	-0.0236139	-2476.66
0.303134	-0.164399	-2475.93
0.220961	0.029182	-2472.89
0.21863	0.141677	-2478.38
0.254753	0.0860799	-2471.94
0.198906	-0.263214	-2475.31
0.169335	0.0702923	-2478.38
0.135401	0.0444119	-2478.38
0.0417322	0.0772263	-2478.38
0.150196	0.0164751	-2474.89
0.0637483	-0.00733369	-2474.11
0.171	0.0551958	-2472.42
0.162815	0.0454534	-2472.89
0.127713	0.0626092	-2472.67
0.0638014	0.0467214	-2470.42
0.124649	0.0391295	-2469.24
0.0912655	0.0635102	-2469.09
0.208689	0.142871	-2478.38
0.196089	0.136197	-2478.38
0.179065	0.0946427	-2478.38
0.147564	0.0821984	-2478.38
0.09501	0.100523	-2478.38
0.0581811	0.101318	-2478.38
0.156229	0.200308	-2475.62
0.118212	0.217063	-2474.5
0.0245663	0.175075	-2476.59
0.174161	0.170986	-2471.14
0.163564	0.136614	-2471.57
0.151457	0.227834	-2472.95
0.0829699	0.125211	-2471.82
0.038217	0.104974	-2471.75
0.187755	0.287357	-2469.55
0.0835898	0.080845	-2469.14
-0.00992215	0.070269	-2478.38
-0.0154902	-0.16882	-2467.38
-0.0289824	0.008424	-2467.98
-0.0987885	-0.113105	-2468.56
-0.135239	0.0563548	-2469.54
0.00462775	0.154828	-2472.04
-0.219864	0.0763122	-2467.13
-0.215881	-0.363567	-2462.18
-0.262356	-0.317447	-2462.18
-0.254319	-0.170567	-2466.79
-0.372793	0.0920377	-2463.92
-0.250628	0.0903116	-2462.18
0.378252	0.0700805	-2398.38
0.293702	0.00366733	-2398.38
0.270124	-0.0628158	-2398.38
0.24947	-0.0949694	-2398.38
0.330862	0.119156	-2398.38
0.276969	0.220665	-2398.38
0.208778	0.169437	-2398.38
0.203903	0.0906071	-2398.38
0.109338	-0.338468	-2398.38
0.0167511	-0.315574	-2398.38
0.0984203	-0.402447	-2394.54
0.170403	0.0262177	-2398.38
0.0166418	0.0587728	-2398.38
0.00645232	-0.0841857	-2394.59
0.161853	0.16593	-2398.38
0.161257	0.17605	-2398.38
0.148292	0.0934301	-2398.38
0.0439627	0.259711	-2398.38
0.0298452	0.121282	-2398.38
0.0117011	0.154861	-2398.38
0.178746	0.170869	-2396.56
0.0362593	0.150886	-2395.13
0.0759076	0.093652	-2391.97
0.0315668	0.0813888	-2391.38
0.0316567	0.0981074	-2393.03
-0.184393	-0.244082	-2393.16
-0.0893718	0.0493133	-2398.38
-0.0977862	0.00620868	-2393.91
-0.104607	0.0274693	-2395.34
-0.118512	-0.167308	-2394.38
-0.136854	-0.191304	-2394.07
-0.159001	-0.174429	-2394.45
-0.149122	-0.0343262	-2391.97
-0.164456	-0.0304064	-2391.14
-0.189112	-0.0409404	-2391.74
-0.0969012	-0.167889	-2388.68
-0.139113	-0.11938	-2387.93
-0.150057	-0.0135209	-2389.18
-0.109947	0.0887726	-2388.75
-0.231729	0.0437677	-2392.1
-0.269287	-0.248296	-2382.18
-0.263301	0.101327	-2383.97
0.332748	-0.439157	-2318.38
0.27347	-0.22774	-2318.38
0.251132	-0.335375	-2318.38
0.332033	0.0413703	-2318.38
0.316513	0.0111492	-2318.38
0.299526	-0.133299	-2318.38
0.29168	0.0051772	-2318.38
0.208912	0.052698	-2318.38
0.189642	-0.226202	-2314.12
0.243805	0.25704	-2318.38
0.236568	0.204375	-2318.38
0.209162	0.120011	-2318.38
0.140084	-0.0758032	-2318.38
0.120757	0.0567175	-2318.38
0.00684912	-0.150015	-2318.38
0.158723	0.08208	-2318.38
0.141302	0.103409	-2318.38
0.125279	0.250195	-2318.38
0.112644	0.265788	-2318.38
0.100345	0.221001	-2318.38
0.0353332	0.102597	-2318.38
0.0347995	0.113535	-2318.38
0.0135376	0.18454	-2318.38
0.113643	0.146869	-2314.91
0.0990749	0.241873	-2316.71
0.0670876	0.0794462	-2315.55
0.124921	0.288615	-2318.38
-0.174263	-0.226373	-2318.38
-0.25131	-0.212234	-2312.33
-0.11374	-0.0182084	-2318.38
-0.116067	-0.187587	-2318.38
-0.174669	-0.185938	-2312.17
-0.253838	0.0821496	-2309.8
-0.259269	-0.307308	-2313.42
-0.31629	-0.210703	-2312.06
-0.308097	-0.17164	-2311.5
-0.323672	-0.185411	-2312.23
0.272476	-0.231884	-2238.38
0.317547	0.0160673	-2238.38
0.299211	0.0276706	-2238.38
0.241423	0.0209771	-2238.38
0.220404	-0.0231594	-2238.38
0.217615	0.0642791	-2238.38
0.254245	-0.077161	-2234.69
0.245271	0.0051573	-2234.45
0.336531	0.164176	-2238.38
0.307784	0.165551	-2238.38
0.249894	0.17241	-2238.38
0.238492	0.246938	-2238.38
0.287095	0.114663	-2234.59
0.19963	-0.0292677	-2238.38
0.135007	0.0709534	-2238.38
0.126439	0.039651	-2238.38
0.0706519	0.0644797	-2238.38
0.0659398	0.076368	-2238.38
0.0513987	0.054203	-2238.38
0.179473	0.00062311	-2236.47
0.0303566	0.041652	-2234.55
0.0892852	0.0222219	-2232.01
0.183552	0.128756	-2238.38
0.163935	0.163953	-2238.38
0.0447977	0.0932486	-2238.38
0.184638	0.138566	-2234.4
0.162207	0.15556	-2234.76
0.168639	0.121369	-2232.73
-0.0210876	-0.196271	-2238.38
-0.141816	-0.24615	-2238.38
-0.15201	-0.269476	-2230.92
-0.136432	-0.189636	-2227.62
-0.0526247	0.0406439	-2238.38
-0.062854	0.0505555	-2238.38
-0.0918558	-0.0280843	-2232.09
0.00634433	0.120044	-2238.38
-0.192581	0.0480425	-2228.66
-0.213166	0.208215	-2235.14
-0.265607	0.0953516	-2228.39
0.356559	-0.0805118	-2151.06
0.251541	0.109114	-2153.69
0.262591	0.0396211	-2149.64
-0.00567598	-0.102113	-2152.41
0.165329	0.0872603	-2158.38
0.186238	0.174508	-2151.35
0.175071	0.196461	-2150.65
0.0325376	0.0503322	-2153.34
0.0300902	0.0728069	-2152.01
0.187093	0.139368	-2148.54
0.0700918	0.0453103	-2148.8
-0.0823262	-0.36564	-2152.53
-0.169824	-0.246514	-2152.35
-0.045658	-0.145187	-2153.57
-0.115171	-0.123885	-2151.31
-0.130255	-0.0641457	-2151.11
-0.163461	-0.0506048	-2151.87
-0.138827	-0.0778278	-2149.18
-0.10027	0.07556	-2151.06
-0.108271	0.0801912	-2150.54
-0.248884	0.198186	-2150.57
0.284756	-0.123847	-2145.06
0.260368	-0.0566196	-2144.15
0.178725	-0.0339654	-2145
0.0850113	-0.0483705	-2146.43
0.173078	0.214734	-2144.34
0.0887204	0.0627325	-2142.18
-0.0962779	0.0575143	-2146.48
-0.262232	0.0965121	-2144.19
0.218658	-0.356818	-2078.38
0.267566	-0.315985	-2076.02
0.270484	-0.21978	-2073.08
0.298332	-0.214212	-2067.8
0.31363	-0.186078	-2078.38
0.29988	-0.0248085	-2078.38
0.281554	-0.0539629	-2078.38
0.248993	-0.00366739	-2078.38
0.235132	0.0319102	-2078.38
0.284909	-0.0615163	-2073.05
0.194918	-0.0236596	-2072.53
0.248835	0.0552358	-2067.45
0.226612	0.112475	-2078.38
0.204451	0.120492	-2073.74
0.25256	0.164813	-2070.5
0.25683	0.256398	-2068.69
0.140035	-0.298765	-2078.38
0.061519	0.0527077	-2078.38
0.0579123	0.0159068	-2078.38
0.0452892	0.0178022	-2078.38
0.0356644	0.0412944	-2078.38
-0.00185616	0.0602746	-2078.38
-0.00326331	-0.0739038	-2076.42
0.126945	-0.00901197	-2071.23
0.163113	0.0544017	-2068.88
0.0891285	0.0335106	-2068.78
0.0557458	0.00854254	-2067.16
0.172452	0.141212	-2078.38
0.164762	0.122992	-2078.38
0.138124	0.102936	-2078.38
0.104863	0.136312	-2078.38
0.13103	0.122259	-2076.34
0.0763617	0.0978685	-2075.75
0.153561	0.102231	-2073.15
0.10551	0.232415	-2069.74
-0.156919	-0.289139	-2073.24
-0.151132	-0.16746	-2078.38
-0.0153026	-0.0218364	-2075.91
-0.138005	-0.0462857	-2073.27
-0.0837294	0.215375	-2072.85
-0.226033	-0.237761	-2078.38
-0.235904	-0.231536	-2076.58
-0.239591	-0.324313	-2071.29
-0.215689	0.0559796	-2072.83
-0.310673	0.157393	-2078.38
-0.328637	0.156884	-2075.22
0.312724	-0.272688	-1998.38
0.279883	-0.360183	-1998.38
0.318439	-0.137488	-1998.38
0.289406	-0.128092	-1998.38
0.25043	0.0522136	-1998.38
0.220316	0.028151	-1998.38
0.303946	-0.0600413	-1994.29
0.208896	0.0403805	-1995.1
0.265864	-0.100303	-1991.79
0.216452	-0.0813378	-1990.74
0.342241	0.0294944	-1989.11
0.239562	-0.0477276	-1988.78
0.179066	0.0963909	-1998.38
0.197185	0.184699	-1996.73
0.222957	0.161185	-1990.52
0.209109	0.173043	-1991.7
0.177344	0.184919	-1991.31
0.171986	0.27654	-1991.78
0.187832	0.231809	-1989.73
0.151225	-0.246646	-1989.59
0.151531	0.0751511	-1998.38
0.140598	-0.121239	-1998.38
0.107268	-0.146464	-1998.38
0.0629198	0.0293342	-1998.38
0.0589529	-0.101876	-1992.38
0.0149043	-0.0731564	-1991.07
0.0339481	-0.0210846	-1989.48
0.156217	0.236736	-1998.38
0.156528	0.157844	-1998.38
0.154301	0.116036	-1998.38
0.127854	0.192536	-1998.38
0.123313	0.223854	-1988.82
-0.152878	-0.260359	-1998.38
-0.188029	-0.246406	-1994.64
-0.182546	-0.305284	-1991.56
-0.0182653	-0.15338	-1998.38
-0.0522117	0.0125197	-1998.38
-0.0598129	0.0502421	-1998.38
-0.0997114	-0.166818	-1998.38
-0.157361	-0.180942	-1998.38
-0.010415	0.0852445	-1998.38
-0.0555138	0.0903727	-1998.38
-0.0574521	0.123404	-1998.38
-0.0811283	0.100205	-1998.38
-0.133499	0.123433	-1998.38
-0.212336	0.0196968	-1994.81
-0.219544	0.0104094	-1995.1
-0.238333	-0.182886	-1989.29
0.27267	-0.212112	-1912.45
0.262789	-0.0501446	-1918.38
0.243583	0.0637881	-1918.38
0.243142	-0.0602368	-1918.38
0.235814	0.0378296	-1918.38
0.21904	0.0391653	-1918.38
0.208346	0.0278298	-1918.38
0.21144	-0.0499904	-1918.38
0.304091	-0.0841023	-1913.96
0.223296	0.0120171	-1908.64
0.204271	-0.0632665	-1909.43
0.192433	0.0460808	-1910.02
0.21569	0.104533	-1918.38
0.206336	0.181398	-1918.38
0.19367	0.178738	-1918.38
0.18101	0.164045	-1918.38
0.19625	0.122254	-1916.34
0.27219	0.207669	-1909.86
0.204068	0.223023	-1908.72
0.177673	0.276212	-1908.79
0.168707	0.0409051	-1918.38
0.152131	0.030102	-1918.38
0.14489	0.0285066	-1918.38
0.0531908	-0.0753222	-1918.38
0.0373208	-0.114607	-1918.38
0.0308702	-0.102783	-1918.38
0.00459584	-0.0746706	-1918.38
0.154186	0.0519629	-1913.99
0.0500691	-0.045233	-1913.75
0.138582	0.0644466	-1912.09
0.00558232	0.0476062	-1910.03
0.0921012	0.16899	-1918.38
0.08158	0.125315	-1918.38
0.022581	0.14868	-1918.38
0.139853	0.128694	-1914.73
0.0267419	0.213688	-1914.52
0.103985	0.200353	-1911.2
0.174869	0.078659	-1910.07
0.139655	0.0948583	-1909.49
0.1518	0.322761	-1918.38
-0.0963903	-0.228577	-1918.38
-0.155497	-0.25802	-1910.99
-0.171172	-0.253465	-1912.68
-0.00151223	-0.0827002	-1918.38
-0.00497313	-0.0966806	-1918.38
-0.168529	-0.196106	-1916.35
-0.150237	-0.0201641	-1910.94
-0.0538877	0.0938073	-1912.25
-0.105322	0.0511915	-1912.35
-0.183249	-0.232529	-1913.28
-0.207647	0.112323	-1918.38
-0.284736	0.0698344	-1908
0.35242	-0.638155	-1918.01
0.362286	0.136298	-1835.34
0.271721	-0.244938	-1838.38
0.216079	-0.301359	-1838.38
0.215372	-0.324556	-1838.38
0.328637	-0.0810385	-1838.38
0.314368	-0.0776581	-1838.38
0.299806	-0.126319	-1838.38
0.287807	-0.0538544	-1838.38
0.266081	-0.0426521	-1838.38
0.256655	0.00297602	-1838.38
0.251845	-0.110238	-1838.38
0.248092	0.0709104	-1838.38
0.233314	0.0318759	-1838.38
0.231821	0.0692348	-1838.38
0.215961	0.087971	-1838.38
0.207238	0.0199315	-1838.38
0.327758	-0.137117	-1832.08
0.182464	0.0176578	-1832.05
0.268891	0.123557	-1838.38
0.25676	0.210997	-1838.38
0.244143	0.219083	-1838.38
0.231264	0.216985	-1838.38
0.227003	0.206169	-1838.38
0.215937	0.170059	-1838.38
0.20327	0.21049	-1838.38
0.189605	0.193189	-1838.38
0.16915	0.218247	-1838.38
0.163549	0.188007	-1838.38
0.161408	0.169639	-1838.38
0.154241	0.151575	-1838.38
0.235184	0.267204	-1830.51
0.207626	0.165032	-1831.47
0.157373	-0.31758	-1838.38
0.150123	-0.315171	-1838.38
0.0393252	-0.210898	-1838.38
0.148773	-0.252169	-1831.66
0.0663475	0.0267281	-1838.38
0.0398143	0.0665014	-1832.78
0.138777	0.118608	-1838.38
0.137456	0.168595	-1838.38
0.127283	0.109363	-1831.57
0.112412	0.233061	-1832.75
-0.11961	-0.199226	-1838.38
-0.164931	-0.286476	-1838.38
-0.172987	-0.227802	-1838.38
-0.195683	-0.349195	-1838.38
-0.106562	-0.221179	-1834.37
-0.152671	-0.288158	-1834.53
-0.0694515	-0.194815	-1832.13
-0.131617	-0.181497	-1838.38
-0.219028	-0.185442	-1831.33
-0.156332	-0.12935	-1830.19
-0.265717	0.220408	-1834.08
-0.245743	0.0972055	-1829.98
-0.257632	0.22514	-1829.47
0.321884	-0.331489	-1758.38
0.269395	-0.202963	-1758.38
0.269481	-0.229314	-1758.38
0.308165	-0.200601	-1756.16
0.30429	0.0809908	-1758.38
0.271937	-0.0269885	-1758.38
0.253094	-0.0725367	-1758.38
0.27653	0.114404	-1758.38
0.244673	0.255936	-1758.38
0.24145	0.316255	-1758.38
0.234905	0.23305	-1758.38
0.230821	0.154781	-1758.38
0.198697	-0.249724	-1758.38
0.180712	-0.332821	-1758.38
0.0758862	-0.275724	-1758.38
0.21117	0.0500767	-1758.38
0.181181	0.0486466	-1758.38
0.155364	-0.0735605	-1758.38
0.0766787	0.0352444	-1758.38
0.160791	0.0698943	-1755.83
0.213317	0.218959	-1758.38
0.210616	0.204874	-1758.38
0.203505	0.177734	-1758.38
0.202856	0.152477	-1758.38
0.200597	0.219661	-1758.38
0.200907	0.111777	-1758.38
0.197125	0.129313	-1758.38
0.188085	0.191318	-1758.38
0.185204	0.220134	-1758.38
0.167805	0.201786	-1758.38
0.157347	0.315167	-1758.38
0.14225	0.202537	-1758.38
0.122453	0.145948	-1758.38
0.100303	0.227908	-1758.38
0.0914905	0.223765	-1758.38
0.0906844	0.153914	-1758.38
0.12825	0.0987219	-1756.69
0.180112	0.288376	-1752.7
0.111933	0.0874942	-1752.47
-0.0557876	-0.219107	-1758.38
-0.0670821	-0.22387	-1758.38
-0.115346	-0.23676	-1758.38
-0.119631	-0.217755	-1758.38
-0.118564	-0.307547	-1758.38
-0.0986009	-0.217652	-1755.32
-0.104565	-0.205493	-1755.12
0.0512391	0.0105777	-1758.38
0.0193314	-0.10552	-1758.38
-0.0499154	-0.12275	-1758.38
-0.0677922	0.0224152	-1758.38
-0.0854355	-0.183538	-1758.38
-0.0862942	-0.167266	-1758.38
-0.123071	-0.158712	-1758.38
-0.0611097	-0.172151	-1752.92
0.0400834	0.0741794	-1758.38
0.0326511	0.105108	-1756.34
-0.169685	-0.298795	-1755.75
-0.157475	0.0580087	-1758.38
-0.16301	-0.100175	-1758.38
-0.177629	0.0673548	-1755.14
0.390484	-0.298694	-1678.38
0.367712	-0.365404	-1678.38
0.354716	-0.172174	-1678.38
0.345385	-0.327899	-1678.38
0.296086	-0.199101	-1678.38
0.301933	-0.0173301	-1678.38
0.297955	-0.118335	-1678.38
0.248068	-0.154021	-1678.38
0.204187	-0.0402945	-1678.38
0.384546	0.215301	-1678.38
0.305419	0.198224	-1678.38
0.305397	0.120061	-1678.38
0.301897	0.101625	-1678.38
0.271603	0.237653	-1678.38
0.265774	0.0931676	-1678.38
0.261762	0.28982	-1678.38
0.255459	0.213451	-1678.38
0.250968	0.164591	-1678.38
0.245028	0.263379	-1678.38
0.217333	0.26928	-1678.38
0.21475	0.10194	-1678.38
0.212289	0.192336	-1678.38
0.210688	0.280141	-1678.38
0.207987	0.143063	-1678.38
0.0623983	-0.0204406	-1678.38
0.0223331	0.0259816	-1678.38
0.19322	0.138549	-1678.38
0.18723	0.231554	-1678.38
0.184332	0.206665	-1678.38
0.183957	0.0868695	-1678.38
0.166069	0.175074	-1678.38
0.159909	0.0941593	-1678.38
0.147091	0.13652	-1678.38
0.144039	0.262934	-1678.38
0.143456	0.119781	-1678.38
0.141118	0.0952194	-1678.38
0.130002	0.141019	-1678.38
0.127515	0.0906401	-1678.38
0.121638	0.20356	-1678.38
0.117441	0.105167	-1678.38
0.0883655	0.182076	-1678.38
0.0343647	0.12824	-1678.38
0.136438	0.351333	-1678.38
-0.0453182	-0.191119	-1678.38
-0.0690757	-0.249899	-1678.38
-0.128549	-0.210055	-1678.38
-0.135745	-0.188786	-1678.38
-0.0606443	0.035561	-1678.38
-0.100068	-0.0451835	-1678.38
-0.218101	0.226103	-1678.38
0.318451	-0.274425	-1598.38
0.281318	-0.349411	-1598.38
0.261501	-0.347052	-1598.38
0.223187	-0.179273	-1598.38
0.221152	-0.143972	-1598.38
0.356225	0.0669908	-1598.38
0.296234	-0.0577668	-1598.38
0.245052	0.0862766	-1598.38
0.224682	0.0168663	-1598.38
0.215377	0.0803261	-1598.38
0.206075	0.0662072	-1598.38
0.203262	0.0255416	-1598.38
0.292934	0.216083	-1598.38
0.245678	0.289173	-1598.38
0.242251	0.243453	-1598.38
0.232938	0.144418	-1598.38
0.21839	0.306787	-1598.38
0.206874	0.331166	-1598.38
0.2088	0.183334	-1598.38
0.197013	0.215559	-1598.38
0.196607	0.203917	-1598.38
0.195224	0.230989	-1598.38
0.179544	0.186477	-1598.38
0.176481	0.234616	-1598.38
0.195474	0.386007	-1598.38
0.163593	-0.203332	-1598.38
0.0945414	-0.25254	-1598.38
0.0612249	-0.151059	-1598.38
0.164519	0.0940039	-1598.38
0.157075	-0.05219	-1598.38
0.150128	0.111209	-1598.38
0.139032	0.0728289	-1598.38
0.128452	0.038214	-1598.38
0.108927	0.110228	-1598.38
0.0857044	0.0109645	-1598.38
0.0612001	0.0449595	-1598.38
0.0334049	0.0107544	-1598.38
0.0071205	-0.103542	-1598.38
0.165409	0.216936	-1598.38
0.159315	0.143408	-1598.38
0.142827	0.293006	-1598.38
0.136318	0.18859	-1598.38
0.113788	0.198247	-1598.38
0.094002	0.126046	-1598.38
0.0846814	0.233472	-1598.38
0.0723216	0.197325	-1598.38
0.0545436	0.196807	-1598.38
0.0365977	0.11384	-1598.38
-0.0703695	-0.183163	-1598.38
-0.126968	-0.241407	-1598.38
-0.129021	-0.222759	-1598.38
-0.147844	-0.250945	-1598.38
-0.110305	-0.150752	-1598.38
-0.140262	-0.144557	-1598.38
-0.149584	-0.0664705	-1598.38
-0.0707767	0.100299	-1598.38
-0.137885	0.279724	-1598.38
-0.192398	-0.192965	-1598.38
-0.225966	0.0720947	-1598.38
-0.290731	-0.0745821	-1598.38
-0.274628	0.125996	-1598.38
0.411967	-0.221038	-1518.38
0.339154	-0.342571	-1518.38
0.235036	-0.230955	-1518.38
0.211645	-0.255914	-1518.38
0.195356	-0.362855	-1518.38
0.19261	-0.216154	-1518.38
0.31341	0.0466233	-1518.38
0.248663	-0.0691585	-1518.38
0.232883	0.0104	-1518.38
0.196112	0.0781323	-1518.38
0.189226	-0.0317089	-1518.38
0.176798	0.0281968	-1518.38
0.239616	0.0955541	-1518.38
0.233207	0.186105	-1518.38
0.21646	0.193621	-1518.38
0.203856	0.0985342	-1518.38
0.190998	0.221022	-1518.38
0.187148	0.132287	-1518.38
0.183714	0.146789	-1518.38
0.160679	0.0791046	-1518.38
0.158632	-0.0101091	-1518.38
0.117092	0.0762411	-1518.38
0.111179	0.0677369	-1518.38
0.0680868	-0.185025	-1518.38
0.0467483	0.0102116	-1518.38
0.0344497	-0.000310406	-1518.38
0.0299043	0.00724643	-1518.38
-0.00267858	-0.0758018	-1518.38
0.17286	0.184222	-1518.38
0.162465	0.194494	-1518.38
0.161795	0.248931	-1518.38
0.16105	0.138672	-1518.38
0.143638	0.241792	-1518.38
0.140491	0.172837	-1518.38
0.119358	0.171394	-1518.38
0.116629	0.191239	-1518.38
0.110277	0.170257	-1518.38
0.084827	0.139084	-1518.38
0.082714	0.0842018	-1518.38
0.0521848	0.216828	-1518.38
-0.0910868	-0.200947	-1518.38
-0.099744	-0.215669	-1518.38
-0.0416777	-0.11222	-1518.38
-0.0474949	-0.17977	-1518.38
-0.0671518	-0.101947	-1518.38
-0.0671763	-0.0778672	-1518.38
-0.0752821	-0.0516593	-1518.38
-0.0921079	-0.135032	-1518.38
-0.117237	-0.04878	-1518.38
-0.127931	-0.0977461	-1518.38
-0.142114	-0.120303	-1518.38
-0.151829	-0.193477	-1518.38
-0.192958	-0.109882	-1518.38
-0.153645	0.182607	-1518.38
-0.191928	0.238008	-1518.38
-0.224897	0.0873956	-1518.38
0.183642	0.0299201	-1434.4
0.239577	0.0396172	-1430.72
0.246832	0.286331	-1438.38
0.18014	0.249953	-1438.38
0.317404	0.239645	-1435.13
0.24379	0.214547	-1435.88
0.20334	0.216473	-1434.58
0.183036	0.212766	-1434.34
0.180097	0.198428	-1434.28
0.313898	0.230443	-1431.73
0.225494	0.230661	-1429.44
0.217544	0.230298	-1428.44
0.201691	0.187133	-1429.68
0.198067	0.148362	-1429.63
0.0346629	-0.122145	-1433.5
0.142595	0.0539034	-1433.96
0.0894515	0.0776937	-1434.51
0.0661578	0.101828	-1434.99
0.136812	0.105472	-1432.99
0.121889	0.124451	-1430.8
0.10183	0.122241	-1428.68
0.0334236	-0.00306507	-1428.8
0.0303323	-0.0345396	-1429.32
0.0123499	0.0427128	-1428.85
0.00226042	0.0575319	-1429.77
0.153255	0.249429	-1438.38
0.149628	0.220003	-1438.38
0.150464	0.193539	-1433.7
0.0801501	0.252823	-1433.92
0.166872	0.159178	-1433.12
0.115213	0.184859	-1429
0.101368	0.171655	-1428.25
0.0725174	0.18482	-1430.2
-0.0376478	-0.157116	-1435.57
-0.0816691	-0.182747	-1434.09
-0.104029	-0.189912	-1433.46
-0.124508	-0.15666	-1433.03
-0.0774019	-0.195403	-1428.87
-0.145564	-0.127675	-1427.53
-0.0230531	-0.0700903	-1433.56
-0.0737876	-0.0152471	-1435.19
-0.105511	-0.0819789	-1431.68
-0.108698	-0.0514578	-1433.27
-0.0495514	0.204047	-1438.38
-0.233766	0.214046	-1434.57
-0.213583	0.209895	-1430.7
-0.251076	0.176729	-1428.26
0.321968	0.0742705	-1355.24
0.40744	-0.0625301	-1348.19
0.214875	-0.29185	-1356.31
0.302885	0.0158791	-1358.38
0.237967	-0.0218091	-1358.38
0.209562	-0.0287281	-1358.38
0.196827	0.0405811	-1358.38
0.312063	0.200783	-1358.38
0.208551	0.179818	-1358.38
0.200753	0.190857	-1358.38
0.188518	0.186832	-1358.38
0.187743	0.236105	-1358.38
0.180566	0.124337	-1358.38
0.179714	0.185458	-1358.38
0.179145	0.194426	-1358.38
0.25044	0.194887	-1349.1
0.189688	0.160082	-1349.2
0.113514	0.0691026	-1358.38
0.0550769	0.079464	-1358.38
0.102927	0.0854636	-1355.07
0.0562233	0.0649154	-1354.98
0.0584051	0.0258194	-1352.64
0.119292	0.0656256	-1348.86
0.13028	0.182232	-1358.38
0.123288	0.121652	-1358.38
0.114833	0.22351	-1358.38
0.103236	0.268441	-1358.38
0.102262	0.105921	-1358.38
0.0916758	0.165903	-1358.38
0.0484604	0.183777	-1358.38
-0.137326	-0.193973	-1358.38
-0.171911	-0.216011	-1356.27
-0.105729	-0.181908	-1351.13
-0.107245	-0.237185	-1348.96
-0.149312	-0.228394	-1349.06
-0.127479	-0.0804607	-1358.38
-0.052284	0.0328442	-1353.77
-0.239178	-0.0036061	-1358.38
-0.258218	-0.00526677	-1356.39
0.228728	-0.260404	-1274.13
0.245271	-0.226353	-1271.47
0.23598	-0.297936	-1269.98
0.256629	0.0422437	-1274.72
0.238338	-0.0630777	-1274.52
0.284549	0.101791	-1271.39
0.207019	-0.0437896	-1271.43
0.231264	0.194635	-1278.38
0.193566	0.235519	-1278.38
0.19475	0.133055	-1278.38
0.32914	0.123388	-1276.11
0.206331	0.202479	-1275.75
0.185862	0.133433	-1275.12
0.278904	0.141769	-1268.69
0.193307	0.182306	-1269.52
0.0254652	0.0146943	-1274.3
0.185409	0.0345668	-1268.57
0.162121	0.235169	-1278.38
0.142816	0.134603	-1278.38
0.115533	0.225757	-1278.38
0.102845	0.22314	-1278.38
0.0912624	0.164255	-1278.38
0.175354	0.168867	-1275.71
0.155108	0.109848	-1274.81
0.135562	0.149674	-1275.24
0.12549	0.123493	-1272.27
0.072247	0.2395	-1270.59
0.142989	0.119761	-1269.76
0.0766804	0.262784	-1267.84
-0.047767	-0.163574	-1273.95
-0.0698874	-0.162532	-1276.36
-0.0842556	-0.173912	-1268.07
-0.0263383	-0.00806996	-1272.72
-0.0862101	0.0066926	-1272.82
-0.115156	-0.0334633	-1267.76
-0.12021	-0.136753	-1268.47
-0.155693	-0.299131	-1272.63
-0.227308	0.33967	-1274.16
0.231197	-0.215976	-1264.57
0.220442	-0.280162	-1265.86
0.251353	-0.104689	-1263.92
0.116227	0.265274	-1265.39
0.0235881	-0.0826879	-1265.38
-0.0201909	-0.0325265	-1266.94
-0.0864622	-0.135456	-1264.05
-0.307997	0.234977	-1264.85
0.304316	-0.349884	-1198.38
0.298726	-0.291089	-1193.86
0.237896	-0.320404	-1193.82
0.246758	-0.285122	-1189.8
0.238218	0.0436072	-1198.38
0.219664	-0.0280928	-1198.38
0.196145	0.111945	-1198.38
0.26566	0.112575	-1194.76
0.295962	0.0763882	-1190.8
0.192861	-0.0253033	-1190.44
0.180505	0.0353637	-1190.49
0.171705	0.0167834	-1191.82
0.170147	0.0338053	-1190.75
0.223134	0.109425	-1189.1
0.244698	0.247982	-1198.38
0.229077	0.299963	-1198.38
0.221349	0.146607	-1198.38
0.20988	0.253671	-1198.38
0.184566	0.301554	-1198.38
0.181126	0.286698	-1198.38
0.189584	0.191298	-1194.07
0.176332	0.180909	-1196.15
0.0733765	-0.165296	-1194.24
0.132496	0.0378029	-1198.38
0.104055	0.0864547	-1198.38
0.033468	0.0756759	-1198.38
-0.0131655	0.0322181	-1198.38
0.0517328	0.0703314	-1193.12
0.138177	0.249408	-1198.38
0.125948	0.126957	-1198.38
0.105406	0.141256	-1198.38
0.0982754	0.214041	-1198.38
0.0907039	0.168574	-1198.38
0.0701279	0.216784	-1198.38
0.0675899	0.162848	-1198.38
0.0654041	0.127902	-1198.38
0.0377175	0.192607	-1196.21
0.1115	0.114705	-1190.6
0.104042	0.243495	-1191.76
-0.0836141	-0.153312	-1198.38
-0.0943746	-0.156813	-1198.38
-0.124341	-0.196088	-1198.38
-0.131447	-0.204662	-1198.38
-0.133591	-0.153286	-1198.38
-0.141072	-0.201377	-1198.38
-0.167553	-0.21171	-1194.5
-0.0581823	-0.152778	-1192.04
-0.0264419	0.0304103	-1198.38
-0.0664791	-0.0799567	-1198.38
-0.0780266	-0.047039	-1198.38
-0.0261394	-0.00142939	-1195.87
-0.0578931	0.0226776	-1193.33
-0.155821	-0.0831918	-1192.05
-0.175269	-0.128661	-1190.82
-0.106773	-0.131356	-1189.81
-0.184759	0.291656	-1198.38
-0.197499	0.294275	-1198.38
-0.186108	0.315223	-1187.65
-0.210765	0.304484	-1198.38
-0.215047	0.316088	-1198.38
-0.210121	0.274735	-1196.46
0.396678	-0.266812	-1108.44
0.346899	-0.110665	-1113.97
0.210436	-0.263579	-1114.39
0.315774	-0.17614	-1110.57
0.224567	-0.339922	-1112.18
0.257819	-0.201466	-1108.48
0.327396	0.0189788	-1115.27
0.319962	0.0111548	-1114.66
0.318201	0.0471755	-1112.31
0.250411	-0.0691852	-1113.22
0.245125	-0.0611667	-1111.14
0.184263	-0.022171	-1111.53
0.176735	0.0561368	-1110.38
0.282329	-0.112207	-1110.21
0.245355	0.246294	-1114.06
0.19854	0.281238	-1113.53
0.220797	0.275293	-1112.18
0.175264	0.246824	-1111.4
0.323257	0.110714	-1109.92
0.295512	0.293821	-1108.71
0.220028	0.129414	-1109.32
0.162538	-0.221475	-1116.7
0.124472	-0.188316	-1107.5
0.161162	0.021967	-1111.87
0.142057	0.20107	-1116.44
0.124524	0.239743	-1116.23
0.116572	0.177522	-1115
0.093537	0.121441	-1115.19
0.148307	0.227514	-1113.37
0.07715	0.22179	-1112.63
-0.185756	-0.195457	-1115.81
-0.0977278	-0.266117	-1110.81
-0.133233	-0.246612	-1113.03
-0.168728	-0.20481	-1111.86
-0.147344	-0.348805	-1108.6
-0.15633	-0.187313	-1109.48
-0.142398	-0.0429383	-1113.52
-0.116608	0.0501249	-1112.12
-0.174147	-0.0145941	-1108.4
-0.0673501	0.188374	-1118.38
-0.194041	-0.188222	-1114.66
-0.275196	-0.380873	-1109.04
0.393668	-0.302271	-1038.38
0.260015	-0.168826	-1038.38
0.306923	-0.18998	-1032.97
0.282926	-0.322287	-1028.96
0.208355	-0.364393	-1029.22
0.272105	-0.146963	-1038.38
0.245517	-0.00984321	-1038.38
0.212668	0.0934079	-1038.38
0.18288	-0.00667654	-1036.71
0.173647	0.0730203	-1028.71
0.326068	0.144042	-1038.38
0.262806	0.170088	-1038.38
0.232432	0.168873	-1038.38
0.230453	0.118606	-1038.38
0.21875	0.193941	-1038.38
0.206598	0.194344	-1036.36
0.233459	0.103726	-1032.03
0.148025	-0.312484	-1032.1
0.162138	0.0596804	-1038.38
0.143584	0.089142	-1038.38
0.104202	0.0601859	-1038.38
0.0662152	0.0248089	-1038.38
0.0267588	-0.0152994	-1038.38
0.137997	0.0938604	-1032.88
0.111565	0.0387631	-1033.27
0.146876	0.0267214	-1028.11
0.140813	0.0399281	-1028.51
0.0583495	-0.0139452	-1027.67
0.0102097	-0.0680883	-1028.93
0.167781	0.187638	-1038.38
0.0980963	0.0960773	-1038.38
0.104537	0.199588	-1029.23
0.088618	0.176397	-1029.71
-0.133977	-0.188368	-1038.38
-0.140587	-0.326431	-1034.32
-0.121102	-0.162317	-1032.92
-0.079094	-0.190253	-1029.44
-0.0153262	-0.0804484	-1038.38
-0.0316566	0.000735529	-1038.38
-0.0396747	-0.0854588	-1038.38
-0.0482817	-0.146286	-1038.38
-0.0895717	-0.134865	-1038.38
-0.0392605	-0.0757137	-1034.24
-0.0540503	0.00429136	-1033.93
-0.223831	-0.0263235	-1038.38
-0.234669	-0.0783551	-1033
-0.218735	0.205889	-1036.4
0.351964	-0.0214992	-951.696
0.295808	-0.310894	-958.38
0.281434	-0.308677	-958.38
0.238276	-0.220218	-958.38
0.26913	-0.343603	-953.708
0.222488	-0.232956	-954.518
0.294026	-0.0618076	-958.38
0.239087	-0.00891349	-958.38
0.222758	0.0172104	-958.38
0.188198	0.000201203	-958.38
0.273745	-0.170476	-956.193
0.182322	-0.0151412	-955.644
0.287044	0.190971	-958.38
0.236936	0.211387	-958.38
0.2295	0.200746	-958.38
0.222504	0.0862047	-958.38
0.162497	0.226532	-958.38
0.152855	0.0906995	-958.38
0.269532	0.327912	-954.72
0.251745	0.190541	-955.323
0.241223	0.171494	-955.07
0.169058	0.179838	-955.488
0.159422	0.0715746	-956.081
0.265298	0.293764	-951.942
0.198683	0.11505	-952.496
0.124571	0.013807	-958.38
0.00813084	-0.0794041	-953.683
0.0548835	0.00344175	-951.1
0.123424	0.232201	-958.38
0.111563	0.230148	-958.38
0.108727	0.142697	-958.38
0.0862116	0.125072	-958.38
0.080155	0.272494	-958.38
0.0924755	0.256794	-955.008
0.0895973	0.181792	-956.007
0.0736684	0.19962	-956.489
0.140165	0.0917868	-951.788
0.120034	0.171859	-951.379
0.026451	0.157475	-950.565
-0.0973526	-0.212175	-958.38
-0.126112	-0.224663	-958.38
-0.126981	-0.331094	-952.276
-0.0641045	-0.108087	-958.38
-0.0852902	-0.106628	-958.38
-0.0916176	-0.0225819	-958.38
-0.0967113	-0.0232686	-958.38
-0.160013	-0.153482	-958.38
-0.0388794	-0.138088	-954.036
-0.0717433	-0.151012	-955.947
-0.116951	-0.109626	-952.622
-0.147327	0.0843688	-951.924
-0.195786	-0.0464488	-958.38
-0.212174	0.216422	-958.38
0.248539	-0.206298	-878.38
0.257626	-0.344953	-878.38
0.240358	-0.269389	-878.38
0.256312	-0.258188	-875.149
0.288964	-0.290521	-872.359
0.270918	-0.263625	-873.041
0.210374	-0.239559	-870.319
0.272782	-0.0011866	-878.38
0.212018	-0.0273033	-878.38
0.174311	0.0126214	-878.38
0.161471	0.10075	-878.38
0.291496	0.0351682	-871.312
0.17494	0.0825208	-872.41
0.229716	0.0398232	-869.524
0.205505	-0.021227	-869.207
0.294923	0.139927	-878.38
0.269385	0.314863	-878.38
0.281292	0.151023	-878.38
0.279934	0.165394	-878.38
0.26544	0.143968	-878.38
0.237399	0.336908	-878.38
0.246011	0.156775	-878.38
0.240285	0.210577	-878.38
0.230861	0.238099	-878.38
0.222814	0.163544	-878.38
0.214435	0.205781	-878.38
0.171192	0.30241	-878.38
0.169756	0.182434	-878.38
0.132823	-0.183187	-873.937
0.154801	0.0481418	-878.38
0.0570225	0.0847624	-871.761
0.0898539	0.059153	-870.058
0.140739	0.156734	-878.38
0.105232	0.30747	-878.38
0.0819977	0.2452	-878.38
0.116659	0.270429	-875.825
0.101413	0.245277	-874.799
0.0555088	0.235742	-875.419
-0.0688012	-0.228791	-878.38
-0.0440087	-0.0295311	-878.38
-0.0608146	-0.176904	-878.38
-0.0792218	-0.0642334	-878.38
-0.0830976	-0.192268	-878.38
-0.101703	0.00885854	-878.38
-0.101408	-0.155754	-878.38
-0.106587	-0.14851	-878.38
-0.0650082	-0.167187	-874.356
-0.0596916	-0.120815	-870.47
-0.0738109	-0.0384635	-873.462
-0.117123	0.168375	-878.38
-0.194669	0.202631	-878.38
-0.186373	-0.229135	-878.38
-0.266352	0.130161	-878.38
-0.282274	0.23685	-878.38
-0.292088	0.238609	-878.38
0.280062	-0.140006	-792.521
0.268472	-0.213254	-791.088
0.237009	-0.253808	-790.767
0.216474	-0.269273	-793.265
0.256691	-0.170473	-788.409
0.259719	-0.100014	-798.38
0.21199	0.0712057	-798.38
0.208188	0.0928443	-798.38
0.203644	0.0962695	-798.38
0.187949	-0.0066031	-798.38
0.236466	-0.101116	-794.373
0.161455	0.0607282	-794.909
0.262741	0.068289	-790.778
0.187551	0.0950726	-791.412
0.16045	-0.0393053	-792.295
0.132714	0.0595377	-790.661
0.134074	-0.00317292	-792.884
0.192115	0.0979771	-790.182
0.164157	0.0260286	-789.264
0.133266	0.035046	-788.321
0.24609	0.190014	-792.524
0.236927	0.178354	-791.017
0.199971	0.146791	-790.455
0.184911	0.182402	-793.429
0.181854	0.141533	-792.434
0.122802	0.0977462	-792.867
0.0551286	-0.00688916	-788.23
0.111113	0.210866	-790.782
0.10617	0.175136	-789.784
0.104379	0.166413	-789.201
-0.143258	-0.299055	-794.949
-0.151083	-0.208904	-792.554
-0.171022	-0.322665	-788.531
-0.100254	-0.117867	-794.131
-0.124707	-0.139759	-794.752
-0.107545	-0.155637	-793.116
-0.104828	-0.0934535	-788.8
-0.17612	0.171209	-788.938
-0.196588	0.101617	-792.501
0.301158	-0.0102014	-784.622
0.225163	-0.352033	-785.539
0.139361	0.0446707	-786.67
0.247114	0.266664	-785.898
0.0953832	0.0165326	-785.463
-0.13117	-0.208967	-785.912
-0.0438313	-0.153952	-785.987
-0.054422	0.0180971	-786.552
0.256776	-0.314023	-718.38
0.232341	-0.218369	-712.291
0.322878	0.0346557	-718.38
0.317951	0.00438887	-718.38
0.294562	0.0385855	-718.38
0.290857	0.0204976	-718.38
0.280906	0.0738037	-718.38
0.276871	0.0529475	-718.38
0.26811	-0.0579971	-718.38
0.239077	0.0884892	-718.38
0.203546	0.0605582	-718.38
0.229588	-0.145019	-714.94
0.212562	-0.128782	-714.564
0.29732	0.169269	-718.38
0.28936	0.296337	-718.38
0.281083	0.307839	-718.38
0.23506	0.206333	-718.38
0.227903	0.172928	-718.38
0.223931	0.186868	-718.38
0.191741	0.244332	-718.38
0.180185	0.169894	-718.38
0.173817	0.157439	-713.604
0.244898	0.150389	-713.206
0.172459	0.0142572	-718.38
0.14977	0.0289874	-718.38
0.138697	0.0498791	-718.38
0.13718	0.0355436	-718.38
0.129883	0.0808698	-718.38
0.128308	0.0489109	-718.38
0.117548	0.0786914	-718.38
0.110917	0.0641067	-718.38
0.0943677	-0.0511506	-718.38
0.15568	0.00275356	-711.306
0.148523	0.121744	-718.38
0.12145	0.169909	-718.38
0.123683	0.0925532	-718.38
0.116292	0.118311	-718.38
0.0875561	0.152301	-718.38
0.0811102	0.190584	-718.38
0.0791877	0.108055	-718.38
0.128217	0.127091	-716.296
0.0745224	0.208775	-716.129
0.159356	0.193252	-712.26
-0.0376514	-0.065437	-718.38
-0.0540692	-0.11643	-718.38
-0.080401	0.000334356	-718.38
-0.0785717	-0.153882	-718.38
-0.0942626	-0.0829834	-718.38
-0.103047	-0.168072	-718.38
-0.117656	-0.190542	-718.38
-0.122751	-0.121422	-718.38
-0.0316731	0.0281706	-714.945
-0.0985731	-0.158926	-712.797
-0.132421	0.125407	-718.38
-0.149003	-0.141007	-718.38
-0.307346	-0.00881497	-718.38
-0.181686	-0.181036	-711.566
0.244062	-0.343284	-638.38
0.240395	-0.280282	-638.38
0.234117	-0.235055	-638.38
0.201382	0.0227173	-638.38
0.180833	0.0360323	-638.38
0.223862	-0.159582	-635.069
0.243091	-0.0636372	-631.389
0.143444	-0.00332328	-632.145
0.260551	0.197681	-638.38
0.229177	0.192379	-638.38
0.221576	0.145649	-638.38
0.215958	0.233311	-638.38
0.207788	0.192951	-638.38
0.204275	0.131604	-638.38
0.199996	0.269068	-638.38
0.197652	0.171115	-638.38
0.178798	0.12747	-638.38
0.166143	0.202662	-638.38
0.159714	0.181185	-638.38
0.148808	0.135157	-638.38
0.266636	0.0835051	-633.892
0.249955	0.298003	-636.141
0.252967	0.0905282	-634.27
0.206677	0.117658	-635.722
0.196787	0.0569353	-635.904
0.169094	0.153764	-634.596
0.167023	0.163389	-635.602
0.188693	0.144874	-632.337
0.164058	0.0648777	-631.376
0.145554	0.0662689	-631.805
0.136846	0.314884	-638.38
0.131047	-0.191271	-638.38
0.114163	0.027034	-638.38
0.11393	-0.0702037	-638.38
0.0148359	-0.0254997	-638.38
0.00758081	-0.0519032	-638.38
-0.0001194	-0.0548591	-638.38
0.106435	-0.0563372	-634.786
0.138601	0.170181	-638.38
0.126002	0.197636	-638.38
0.125819	0.0927896	-638.38
0.0963222	0.18163	-638.38
0.0839903	0.199632	-638.38
0.0356751	0.0488014	-638.38
0.087629	0.170791	-634.41
0.0875704	0.056726	-635.689
0.0578717	0.0491041	-635.687
0.112918	0.0642044	-631.293
0.0316819	0.156586	-630.113
-0.0954328	-0.249392	-638.38
-0.134384	-0.264255	-633.826
-0.0427361	-0.146172	-638.38
-0.0782012	-0.101113	-638.38
-0.0930399	-0.108902	-638.38
-0.103985	-0.14717	-638.38
-0.12152	-0.0798355	-638.38
-0.152195	-0.210794	-638.38
-0.155356	-0.158691	-638.38
-0.0516488	0.0157403	-633.193
-0.115868	-0.126665	-631.416
-0.0747576	0.0972237	-638.38
-0.0825538	0.0978983	-638.38
-0.096587	0.0938776	-638.38
-0.323391	-0.0184246	-638.38
-0.312968	0.147709	-638.38
-0.246348	0.135396	-629.963
0.357048	-0.285647	-558.38
0.35424	-0.16971	-558.38
0.311168	0.00987898	-558.38
0.248792	-0.20814	-558.38
0.28468	0.053978	-558.38
0.279642	0.0493031	-558.38
0.282033	-0.11224	-558.38
0.216338	-0.0533514	-558.38
0.212291	-0.00243668	-558.38
0.184532	-0.0560039	-558.38
0.167139	-0.0633538	-558.38
0.20542	-0.0903913	-551.018
0.180808	0.0333692	-552.248
0.167743	-0.0293171	-552.77
0.137657	-6.28322e-05	-551.463
0.286103	0.124798	-558.38
0.259271	0.275923	-558.38
0.231658	0.215905	-558.38
0.216912	0.217072	-558.38
0.173781	0.11731	-558.38
0.160653	0.180144	-558.38
0.138552	0.0596995	-558.38
0.132508	0.0667608	-558.38
0.151201	0.12338	-555.362
0.302761	0.0827399	-551.684
0.195328	0.148972	-552.766
0.180868	0.16369	-550.484
0.139454	0.290389	-550.528
0.131042	0.294515	-552.119
0.146402	0.270853	-548.919
0.130422	-0.0643337	-558.38
0.0661642	0.0257294	-558.38
0.0648462	-0.030355	-558.38
0.0563148	-0.016538	-558.38
0.0234344	-0.0109648	-558.38
0.0167483	0.00717983	-558.38
0.00998586	-0.0188834	-558.38
-0.0154017	-0.0106606	-558.38
0.0683262	-0.0623601	-556.268
0.0468693	0.00872525	-556.624
-0.00276854	-0.0803661	-556.42
0.112246	-0.00740415	-551.867
0.101836	-0.0359144	-551.069
-0.0101098	0.0142498	-551.911
0.119521	0.0861886	-558.38
0.0903436	0.125957	-558.38
0.0905527	0.079627	-558.38
0.0741489	0.181639	-558.38
0.0520644	0.161044	-558.38
0.0479508	0.15365	-558.38
0.0337382	0.185724	-558.38
0.0393238	0.1379	-551.361
0.00996659	0.0436675	-552.636
-0.0449186	-0.0527122	-558.38
-0.0635027	0.034235	-558.38
-0.0656861	0.0115021	-558.38
-0.0827645	-0.00972291	-558.38
-0.0874539	-0.0289669	-558.38
-0.0874747	-0.0929419	-558.38
-0.102784	-0.20566	-558.38
-0.115708	-0.0276654	-558.38
-0.16296	-0.0554431	-558.38
-0.0484511	0.0158435	-554.571
-0.0493827	0.0250115	-556.754
-0.0795411	-0.208741	-555.342
-0.0989357	-0.0313521	-556.71
-0.0754215	-0.0064896	-552.588
-0.120367	-0.174227	-551.194
-0.17345	-0.0414186	-551.006
-0.183283	0.23802	-558.38
-0.188572	0.232884	-558.38
-0.165777	0.167401	-551.5
-0.231271	-0.0122534	-558.38
-0.206195	-0.214115	-549.612
-0.232846	0.004192	-550.109
-0.297957	0.108779	-555.451
-0.300387	0.142859	-547.72
0.313421	0.0422505	-473.094
0.301161	0.175414	-473.826
0.280939	0.0810292	-475.754
0.299493	0.157474	-470.554
0.301301	0.0826469	-472.32
0.2822	0.0896058	-473.05
0.282583	0.129698	-467.979
0.246239	-0.253502	-474.816
0.219691	-0.259051	-467.733
0.192435	0.0235102	-478.38
0.272453	-0.187394	-474.157
0.205645	-0.0751613	-476.055
0.120848	0.0139114	-474.389
0.267127	-0.00436761	-472.831
0.253757	-0.10523	-471.117
0.236363	-0.187565	-470.857
0.211429	0.0143024	-471.494
0.187689	-0.202493	-473.097
0.27254	0.00880908	-469.069
0.150975	0.0996526	-478.38
0.24109	0.221956	-475.819
0.234524	0.224779	-475.433
0.187094	0.187986	-473.585
0.18754	0.14298	-474.954
0.116325	0.110888	-474.362
0.216448	0.181639	-472.286
0.165159	0.194763	-471.784
0.210113	0.169542	-469.849
0.204602	0.169339	-467.668
0.198808	0.177374	-468.822
0.1879	0.0471699	-467.758
0.134363	0.0643614	-468.121
0.130567	0.157803	-468.954
0.266541	0.317887	-473.257
0.204668	0.313079	-467.042
0.106813	-0.00672241	-478.38
0.0583691	-0.110683	-474.154
0.0361701	-0.097509	-474.471
0.0278126	-0.0947261	-471.667
-0.0360105	-0.204255	-471.068
0.0495529	-0.0502953	-468.722
0.0359271	0.0222539	-470.041
0.0335435	-0.0661268	-467.694
0.0679621	0.0696312	-472.462
0.0571553	0.223879	-472.426
0.067202	0.166818	-468.764
0.0518309	0.269418	-467.288
-0.119581	-0.168127	-474.627
-0.0711031	-0.097619	-471.706
-0.0941466	-0.18897	-473.237
-0.165975	-0.131403	-470.346
-0.0671396	-0.0708361	-467.356
0.160809	0.0237896	-465.914
0.191658	0.221138	-465.505
0.0939768	-0.0255004	-465.688
0.0874976	-0.019833	-466.386
0.0399478	0.00944313	-465.974
-0.0420684	-0.147486	-466.53
0.0975698	0.0725881	-465.897
-0.114215	-0.207376	-466.036
-0.141838	-0.216329	-465.435
-0.159387	-0.212041	-464.792
0.233814	-0.264559	-392.923
0.203725	0.0304255	-391.514
0.206005	-0.0700844	-390.759
0.192915	0.028891	-392.586
0.298088	0.000801338	-387.89
0.299231	-0.146679	-389.274
0.279826	-0.147028	-389.156
0.237751	0.19615	-392.666
0.232405	0.0642997	-392.485
0.227923	0.16803	-392.783
0.215989	0.180407	-392.456
0.195247	0.152595	-392.626
0.194559	0.170285	-392.638
0.192654	0.0637982	-392.527
0.185645	0.1491	-392.892
0.181137	0.142596	-392.952
0.174009	0.14646	-392.399
0.16783	0.21962	-392.351
0.14067	0.224511	-391.321
0.138343	0.104339	-390.825
0.259567	0.114193	-388.613
0.235273	0.175262	-390.123
0.185479	0.257492	-389.908
0.156369	0.11604	-387.767
0.136027	0.184168	-387.126
0.0243884	-0.0578998	-389.113
0.110144	0.197824	-393.462
0.0953008	0.199911	-390.983
0.063893	0.0724744	-391.186
-0.00627287	0.0371659	-393.365
0.0892657	0.222852	-387.232
0.0537919	0.0817393	-387.939
-0.057057	-0.190649	-391.875
-0.0591792	-0.0700312	-387.613
-0.0637026	-0.122407	-387.493
-0.080401	-0.176287	-390.12
-0.119474	-0.0535233	-388.993
-0.125745	-0.0809376	-389.186
-0.137321	-0.183005	-387.766
-0.176954	-0.126919	-388.366
0.268052	-0.0113228	-386.676
0.205831	-0.0379873	-385.591
0.168584	0.161295	-384.402
0.160925	0.293335	-384.207
0.112724	0.153242	-385.173
0.100515	0.173929	-384.175
0.0951857	0.169452	-384.655
-0.0211908	0.0609185	-385.657
-0.0706988	-0.0815786	-385.883
0.300238	-0.00765089	-315.149
0.296043	0.134373	-314.13
0.224025	-0.261044	-314.34
0.262695	0.0719716	-318.38
0.269395	0.00695488	-314.458
0.165937	-0.0053781	-314.088
0.142309	0.0843202	-315.216
0.129323	0.0866446	-315.27
0.236169	-0.0663811	-311.037
0.214699	0.0449727	-311.241
0.160007	0.029769	-310.766
0.130039	-0.0399373	-309.924
0.283123	0.163996	-314.233
0.175263	0.171184	-314.83
0.142277	0.15141	-315.466
0.220901	0.211822	-313.384
0.220742	0.176938	-311.919
0.210164	0.145616	-311.306
0.198422	0.198025	-312.295
0.197333	0.169792	-312.172
0.192569	0.211176	-312.602
0.193433	0.127784	-312.825
0.184037	0.194636	-312.419
0.184016	0.127193	-313.319
0.148391	0.203549	-311.187
0.104008	0.0331432	-314.815
0.118963	0.0358205	-312.869
0.116707	0.0580366	-311.741
0.110647	0.0437643	-312.631
0.0819839	0.0424034	-311.797
0.0548236	0.0478674	-310.706
0.109372	-0.0407048	-309.775
0.0684626	0.00779552	-310.237
0.0346991	0.00459097	-309.828
0.10798	0.220596	-315.003
0.0984148	0.221063	-315.394
-0.110217	-0.206621	-312.599
-0.118539	-0.185424	-311.331
-0.122266	-0.211101	-310.408
-0.140127	-0.20462	-311.717
-0.0923549	-0.175674	-309.423
-0.117052	0.0603554	-314.61
-0.125218	0.0600153	-314.825
-0.0719449	-0.0577005	-311.974
-0.164877	0.0149601	-311.673
-0.151558	-0.169357	-309.573
-0.242643	0.182049	-311.51
-0.350365	0.14653	-308.313
0.320083	0.0586979	-231.105
0.316897	0.101198	-233.163
0.274274	-0.278258	-238.38
0.278338	-0.375737	-234.737
0.268079	-0.28152	-234.892
0.20849	-0.255222	-229.514
0.30535	0.0811489	-238.38
0.243457	-0.0605821	-238.38
0.231709	0.0305206	-238.38
0.212189	-0.0957794	-238.38
0.193158	-0.0690084	-238.38
0.155997	-0.0862306	-238.38
0.161857	-0.130886	-236.105
0.164932	-0.111314	-232.684
0.30402	-0.0864206	-229.766
0.290876	0.0620192	-229.035
0.248923	-0.134524	-228.901
0.240459	0.0916591	-238.38
0.209845	0.0930142	-238.38
0.159119	0.114167	-238.38
0.142783	0.116579	-238.38
0.205954	0.121085	-234.65
0.265645	0.296143	-231
0.227357	0.176687	-232.972
0.220677	0.184651	-231.492
0.174317	0.146439	-232.113
0.120954	0.13309	-230.587
0.260965	0.194259	-229.309
0.230547	0.129217	-229.376
0.0930689	-0.191934	-232.424
-0.0205914	-0.141779	-238.38
-0.037528	-0.167552	-238.38
0.0625005	-0.00640944	-234.943
0.083525	-0.006691	-227.474
0.0673993	0.0362026	-228.533
0.0595944	0.0417248	-228.344
0.0302531	0.0576222	-229.838
0.114572	0.162976	-238.38
0.0999027	0.127285	-228.537
0.0682797	0.190722	-229.171
-0.0863275	-0.378587	-238.38
-0.07787	-0.224165	-235.872
-0.119176	-0.239005	-230.283
-0.0835018	-0.167943	-238.38
-0.0961832	-0.187701	-238.38
-0.115879	-0.176375	-238.38
-0.0692268	-0.147647	-235.165
-0.0998916	-0.166086	-231.539
-0.138338	-0.177434	-233.376
-0.159887	-0.136917	-232.358
-0.248781	0.17019	-236.538
-0.259025	0.145705	-234.288
-0.271442	0.133149	-230.972
0.382965	-0.162424	-150.345
0.268759	-0.183323	-155.72
0.252264	-0.36016	-152.607
0.277394	0.0312663	-151.608
0.26112	0.0484197	-151.143
0.235967	-0.138355	-152.083
0.211708	0.0116419	-153.333
0.308923	-0.00299408	-149.502
0.286041	0.049125	-149.769
0.251989	-0.00210736	-149.329
0.254929	-0.150287	-149.798
0.235305	-0.00298857	-149.526
0.199472	0.106647	-154.158
0.228928	0.215616	-152.61
0.174384	0.210299	-150.718
0.190861	0.16087	-147.697
0.177005	0.236657	-149.51
0.0771808	-0.214915	-151.543
0.148062	0.0302973	-153.569
0.14735	0.0598567	-152.725
0.136949	0.0603896	-152.767
0.120113	0.194039	-152.276
0.116346	0.203401	-150.388
0.10298	0.164558	-151.978
0.1588	0.200628	-147.69
0.0895711	0.200031	-147.765
-0.13054	-0.198433	-150.844
-0.126676	-0.209981	-150.094
-0.137233	-0.212775	-148.257
-0.114716	-0.11585	-151.025
-0.171628	-0.11421	-148.806
0.247441	0.023316	-145.144
0.228632	-0.00848441	-146.385
0.216937	-0.138143	-146.324
0.178843	-0.14162	-145.582
0.263097	0.157435	-145.233
0.229989	0.288544	-144.623
0.220715	0.184492	-145.013
0.214187	0.187481	-144.968
0.183632	0.133581	-145.37
0.17995	0.19716	-145.684
0.176616	0.169435	-144.891
0.16768	0.141164	-144.522
0.123875	0.00583747	-145.498
0.109147	0.04827	-145.144
0.0936534	0.0587925	-142.45
0.161355	0.0853224	-144.999
0.133723	0.233994	-146.813
0.119084	0.0852013	-143.845
0.111645	0.258418	-145.139
0.106804	0.237405	-146.698
0.101904	0.109849	-144.086
0.162674	0.172695	-142.59
0.144813	0.308007	-143.358
0.080252	0.1128	-143.024
0.0733711	0.298314	-142.668
-0.176451	-0.215696	-138.94
-0.0923598	-0.14846	-144.406
-0.147729	0.0582686	-144.746
-0.110067	-0.13937	-143.606
-0.286596	-0.0489202	-138.94
0.339168	0.0144712	-78.38
0.338743	-0.129259	-78.38
0.308476	0.116628	-75.7363
0.308289	0.0741747	-71.9695
0.223921	-0.308459	-78.38
0.29662	-0.369676	-72.3302
0.287675	0.0422286	-78.38
0.245729	-0.110922	-78.38
0.209376	-0.0820158	-78.38
0.181364	0.0529633	-78.38
0.140229	0.00470126	-78.38
0.276744	0.0551852	-70.651
0.163461	0.0414738	-71.3474
0.148873	-0.018892	-73.4262
0.25545	0.205686	-78.38
0.241324	0.161696	-78.38
0.225898	0.182726	-78.38
0.204005	0.120622	-78.38
0.201482	0.177735	-78.38
0.201136	0.154905	-78.38
0.197714	0.0640342	-78.38
0.183166	0.164485	-78.38
0.156498	0.166859	-78.38
0.243326	0.235478	-74.7554
0.231493	0.197597	-74.0473
0.236778	0.241015	-72.7203
0.236704	0.0909105	-70.5006
0.229411	0.278475	-72.2603
0.200604	0.256998	-70.419
0.192336	0.129457	-71.8867
0.188843	0.201009	-73.0154
0.18656	0.145859	-73.1744
0.22789	0.269646	-69.909
0.122554	-0.0599681	-78.38
0.0828157	0.000288642	-78.38
0.0621103	0.0467602	-78.38
0.0298873	0.0469659	-78.38
0.105085	-0.0440421	-71.8646
0.0506948	0.019606	-71.8237
0.0438961	-0.0554535	-72.9538
0.125083	0.180254	-78.38
0.119268	0.0851567	-78.38
0.0948832	0.260247	-78.38
0.0899371	0.223533	-78.38
0.0612504	0.206935	-78.38
0.0558307	0.251563	-78.38
0.043141	0.254815	-78.38
0.133048	0.146399	-74.5212
0.125366	0.0653431	-75.422
0.0437309	0.106466	-74.2399
0.116376	0.0939351	-69.9791
0.028528	0.172095	-69.6044
-0.132401	-0.225374	-72.3869
-0.0790041	-0.20809	-78.38
-0.0936438	-0.153857	-78.38
-0.0948076	-0.0727815	-78.38
-0.125231	-0.186946	-78.38
-0.0803326	0.0497913	-76.7256
-0.0726056	0.0223942	-71.9618
-0.0725052	-0.0650165	-71.6566
-0.0941944	-0.125093	-71.1711
-0.110512	-0.182113	-70.563
-0.132793	0.206352	-78.38
-0.166588	0.19583	-78.38
-0.170319	0.0979086	-78.38
-0.183778	0.0955445	-78.38
-0.189603	0.172883	-78.38
-0.195933	0.27432	-78.38
-0.181788	0.192754	-69.9321
0.373789	0.0189691	1.62
0.370986	-0.0442696	1.62
0.355354	-0.0377251	1.62
0.336184	-0.129381	1.62
0.322641	-0.20072	1.62
0.305012	-0.343343	8.3487
0.21814	-0.207944	8.54027
0.315556	-0.257626	10.3179
0.299832	-0.136048	1.62
0.264914	-0.0473595	1.62
0.239532	0.0283794	1.62
0.209543	-0.0553682	1.62
0.290819	0.0349211	3.42185
0.181002	0.0204251	6.01117
0.263702	0.0881434	8.28251
0.226044	0.0344328	7.92492
0.156461	-0.00784635	8.84821
0.258105	-0.0837013	12.0344
0.217252	-0.00383135	10.3719
0.242107	0.220624	1.62
0.18342	0.122429	1.62
0.136774	0.102856	1.62
0.2559	0.232748	5.02926
0.234031	0.30899	4.50252
0.196201	0.139579	6.77707
0.187194	0.230715	8.22233
0.137338	0.238817	9.21648
0.263556	0.177096	11.9567
0.146925	0.233486	9.92066
0.119687	0.00258794	1.62
0.047277	0.0124535	8.66039
0.0574697	-0.00811808	12.9388
0.0370602	-0.00794248	11.4308
0.112916	0.0981632	1.62
-0.035751	0.162729	1.62
0.0680425	0.22178	4.65867
0.0533305	0.19982	5.77366
0.115054	0.198745	9.28197
0.0747362	0.206507	7.78438
0.0654124	0.261965	8.47286
0.039554	0.100157	7.63733
-0.0795076	-0.102118	1.62
-0.0841154	-0.116401	1.62
-0.0833414	-0.193711	1.62
-0.0977173	-0.00735429	1.62
-0.10199	-0.164625	1.62
-0.119483	-0.0215671	1.62
-0.157162	0.00989745	1.62
-0.0937123	-0.113627	8.54203
-0.0949085	-0.180433	10.5131
-0.126873	-0.172754	12.0731
-0.35489	-0.0540322	1.62
-0.235154	-0.15374	5.66144
0.337939	-0.0392122	81.62
0.340872	-0.174195	81.62
0.386519	-0.11153	85.0939
0.34103	-0.052757	92.3657
0.191839	-0.265454	81.62
0.28359	-0.345715	83.9785
0.300811	-0.042858	81.62
0.294879	-0.0221346	81.62
0.294415	-0.0661975	81.62
0.272121	0.0604263	81.62
0.264815	0.011096	81.62
0.237092	-0.0142532	81.62
0.151135	0.00860472	81.62
0.320184	-0.0422731	86.3721
0.268171	-0.197628	87.918
0.249223	0.0271363	89.1118
0.222753	-0.0686291	87.9451
0.184068	0.00904078	89.6181
0.169914	0.00213799	86.6257
0.287517	0.19465	81.62
0.213522	0.192475	81.62
0.209477	0.17496	81.62
0.199757	0.0825328	81.62
0.190955	0.155953	81.62
0.178764	0.221197	81.62
0.248069	0.104355	83.9949
0.201547	0.199698	85.3884
0.178376	0.12968	84.6412
0.253433	0.214482	89.0437
0.254135	0.151011	89.1854
0.221231	0.158453	87.7953
0.149249	0.0716299	89.155
0.134027	0.0241445	81.62
0.134208	-0.0784856	81.62
0.130654	0.0380765	81.62
0.114322	0.0172249	81.62
0.102735	0.0131575	81.62
0.0835075	0.0215244	81.62
0.0771015	0.0142427	81.62
0.0650919	0.0323968	81.62
0.063343	-0.0217491	81.62
0.0575485	0.000871857	81.62
-0.0418328	-0.128763	81.62
0.0535608	0.053516	84.9591
0.0714134	0.0416831	87.5614
0.132115	0.11583	81.62
0.0864164	0.198189	81.62
0.0858352	0.217199	81.62
0.050548	0.222422	81.62
0.128167	0.0771543	84.7416
0.0738393	0.0752999	85.5091
-0.131338	-0.190864	81.62
-0.147288	0.0471305	81.62
-0.143259	-0.130597	81.62
-0.0775866	-0.114657	84.0235
-0.071985	-0.154617	86.9997
-0.0915051	-0.0154064	88.023
-0.116795	-0.00967375	86.9707
-0.142068	-0.228262	88.0457
-0.0900974	-0.146173	91.4884
-0.178687	-0.227021	90.7858
0.373062	-0.31659	161.62
0.326029	0.0441851	166.717
0.325879	0.144582	161.62
0.269667	-0.324784	161.62
0.289627	0.00334735	161.62
0.280848	-0.0202594	161.62
0.263029	-0.108652	161.62
0.259192	0.0838184	161.62
0.244193	0.0945824	161.62
0.233909	0.0918056	161.62
0.234615	-0.0236905	161.62
0.232925	0.0457584	161.62
0.215879	0.0723441	161.62
0.201492	-0.102868	161.62
0.201158	-0.0621641	161.62
0.200725	-0.086123	161.62
0.194651	-0.0630226	161.62
0.193887	-0.0761462	161.62
0.188438	-0.120424	161.62
0.185526	0.0516896	161.62
0.182862	-0.0985878	161.62
0.151596	-0.0139701	161.62
0.124805	0.0922842	161.62
0.236113	0.0272291	163.253
0.219031	-0.155002	163.324
0.214185	0.00563572	166.044
0.144799	-0.0555152	164.455
0.188076	-0.198144	167.075
0.230482	0.208816	161.62
0.221702	0.168233	161.62
0.21913	0.135799	161.62
0.215419	0.234746	161.62
0.159193	0.159402	161.62
0.147208	0.239538	161.62
0.302054	0.213104	165.295
0.262399	0.149641	167.362
0.118875	-0.0314625	161.62
0.113115	0.0928248	161.62
0.107771	-0.0299955	161.62
0.10584	-0.12732	161.62
0.0980983	-0.0169954	161.62
0.0817735	-0.0898093	161.62
0.0748826	-0.00466476	161.62
0.0615386	-0.0290984	161.62
0.0616266	-0.087622	161.62
0.0581443	-0.171896	161.62
0.0541271	-0.00359841	161.62
0.0374234	-0.199168	161.62
0.112927	-0.00214869	163.53
0.108818	-0.0778574	165.718
0.0750937	-0.121601	165.557
0.0702358	0.080752	165.898
0.047303	-0.0220824	165.067
0.0443808	0.00473219	168.036
0.043571	-0.0089829	167.952
0.109753	0.103579	161.62
0.0857014	0.17223	161.62
0.0838295	0.256758	161.62
0.0734903	0.216876	161.62
0.0571004	0.233082	161.62
0.0535025	0.10018	161.62
0.0671866	0.234635	165.539
0.0892676	0.155006	166.649
0.0755106	0.0938923	166.877
-0.0934024	-0.268954	161.62
-0.183624	-0.224531	167.41
-0.0631431	-0.0289524	161.62
-0.0758941	0.0155042	161.62
-0.116633	-0.199464	161.62
-0.13279	-0.13253	161.62
-0.134024	-0.196418	161.62
-0.28571	0.00246453	161.62
0.362634	-0.0903382	243.511
0.312549	-0.0223328	244.333
0.317088	-0.078805	249.383
0.296033	-0.0248482	248.288
0.27968	-0.300686	242.8
0.264742	-0.294891	242.926
0.282104	0.0260471	236.751
0.271918	0.027565	236.882
0.250281	-0.173623	240.918
0.244591	-0.179336	241.112
0.229238	-0.0145413	238.316
0.189166	-0.105502	240.616
0.182987	-0.116402	240.913
0.1386	-0.163195	242.466
0.284797	-0.206916	244.889
0.268299	0.0154352	238.983
0.134451	-0.0824966	247.137
0.207728	-0.0793531	250.023
0.118552	0.0267123	249.835
0.156124	0.150985	236.446
0.155798	0.104067	245.141
0.142569	0.0950946	245.134
0.234646	0.122059	244.017
0.207875	0.208231	245.536
0.18769	0.124566	245.242
0.164929	0.123026	245.192
0.154927	0.131012	246.117
0.0389833	-0.0389365	241.73
-0.0455109	-0.0899803	248.647
0.104972	-0.068413	246.399
0.0743408	-0.0752811	251.224
0.0740438	-0.0548351	250.641
0.0333061	-0.0797048	251.407
0.0272208	0.0750483	239.833
0.0940316	0.202091	242.669
0.0828863	0.110835	244.465
0.0585063	0.156818	242.96
-0.080017	0.00994302	242.58
-0.0764024	-0.245037	247.27
-0.0928077	-0.205777	246.774
-0.119757	-0.271922	248.39
-0.125242	-0.135419	245.929
-0.178078	-0.222044	248.295
-0.267261	0.200244	250.122
0.313693	0.196398	244.536
0.304282	0.117276	329.351
0.313653	-0.0779515	332.377
0.245462	-0.27728	325.86
0.272882	0.0774424	326.02
0.202191	0.0724895	324.445
0.134092	0.0162207	325.992
0.247139	-0.0862287	329.157
0.233759	-0.153623	328.377
0.215919	0.0695263	328.906
0.180514	-0.13094	328.916
[truncated: 574 more rows]

## Sheet: Sheet2
0.361186	-0.267823	-2477.33
0.305142	-0.313352	-2317.67
0.326607	-0.283102	-2317.2
0.36383	0.0211788	-2316.59
0.313606	-0.352306	-2237.57
0.331613	-0.34477	-2238.17
0.290885	-0.346444	-2145.42
0.311842	-0.317065	-2145.42
0.292587	-0.33263	-2078.11
0.315084	-0.332938	-2078.05
0.331041	-0.325114	-1997.93
0.320018	-0.316755	-1997.31
0.338825	-0.283575	-1997.66
0.413281	-0.0183793	-1998.38
0.341465	-0.154404	-1998.38
0.298035	-0.333726	-1916.18
0.296753	-0.242024	-1911.9
0.327226	-0.258206	-1918.38
0.36886	-0.283976	-1837.84
0.356837	-0.256226	-1838.38
0.381364	-0.258511	-1836.41
0.40903	-0.237108	-1756.37
0.348952	-0.117666	-1758.38
0.380782	-0.234018	-1678.38
0.345506	-0.0895699	-1678.38
0.361917	-0.0904586	-1678.38
0.391356	-0.24383	-1597.84
0.350506	-0.112794	-1598.38
0.372691	-0.10302	-1598.38
0.302842	-0.105551	-1598.38
0.292379	-0.301729	-1518.14
0.366202	-0.285747	-1517.55
0.367659	-0.197183	-1515.48
0.341839	-0.13118	-1518.38
0.355872	-0.0878767	-1518.38
0.295228	-0.0680204	-1518.38
0.341348	-0.34359	-1429.93
0.35703	-0.158659	-1436.17
0.373425	-0.13894	-1436.17
0.351328	-0.0378372	-1435.14
0.346752	0.0727901	-1431.9
0.299441	-0.259217	-1351.9
0.358188	-0.227904	-1348.66
0.38224	-0.275618	-1356.5
0.368716	-0.125307	-1357.75
0.338228	-0.115471	-1358.38
0.337481	-0.0967944	-1351.9
0.328232	-0.0563331	-1358.38
0.308845	-0.120459	-1358.38
0.400157	-0.242828	-1278.16
0.299377	-0.0965093	-1265.42
0.282868	-0.0942029	-1265.42
0.304098	-0.0622625	-1275.14
0.295073	-0.0338583	-1265.42
0.289057	-0.000791513	-1268.66
0.29428	-0.0220907	-1198.38
0.301667	-0.146941	-1038.38
0.306933	-0.0944201	-1035.14
0.427442	-0.33316	-957.41
0.377751	-0.311996	-957.3
0.320248	-0.236293	-957.82
0.325607	-0.116444	-951.9
0.367921	-0.265143	-878.24
0.355503	-0.127337	-878.38
0.290098	-0.206432	-877.067
0.312024	-0.0874726	-785.42
0.389787	-0.234839	-718.243
0.285697	-0.103728	-465.42
0.302663	-0.221594	-315.902
0.287033	-0.236238	-317.027
0.341727	-0.121363	161.62
0.358934	-0.251471	240.658
0.346784	-0.237677	247.075
0.355424	-0.196003	404.86
0.310365	-0.216604	577.82
0.416296	-0.197062	578.366
0.348046	-0.0340131	577.82
0.33333	-0.172225	658.175
0.31379	-0.294	731.34
0.308749	-0.228827	737.82
0.336272	-0.173942	738.413
0.335291	-0.189808	808.1
0.375724	-0.198552	882.807
