# Supplementary material for: Spinal premotor interneurons controlling antagonistic muscles are spatially intermingled
Source: eLife. 2022 Dec 13;11:e81976. doi: 10.7554/eLife.81976 (PMC9844990; doi:10.7554/eLife.81976)
Supplement: Figure 12—figure supplement 1—source data 4. [file elife-81976-fig12-figsupp1-data4.xlsx]

## Sheet: Sheet1
-0.205187	0.00421177	-1998.61
-0.188329	0.00976241	-1995.83
0.170241	0.214924	-1997.85
0.35857	-0.208839	-1993.05
-0.211007	0.0785829	-1918.61
-0.226285	0.0525656	-1915.83
0.299065	0.0794045	-1913.05
0.35954	-0.027088	-1913.05
0.256935	0.11356	-1915.83
0.267319	0.120823	-1918.61
0.391573	-0.0213187	-1838.61
0.369733	-0.302016	-1838.61
0.291417	0.0186909	-1838.61
0.317623	0.0122702	-1838.61
0.193822	0.0909319	-1838.61
0.185782	0.191487	-1838.61
0.447345	-0.123612	-1838.61
-0.0613751	0.282776	-1758.61
0.169958	-0.218903	-1758.61
0.418002	-0.135939	-1758.61
0.411098	-0.176498	-1755.98
-0.227757	-0.0643406	-1675.83
0.055093	0.291823	-1670.88
0.0843993	0.211102	-1673.05
0.0877238	0.194642	-1673.05
0.145926	0.137373	-1675.83
0.160943	0.119264	-1673.05
0.152955	0.108697	-1673.05
0.102159	0.121057	-1675.83
0.125242	0.0585303	-1673.05
0.164891	0.0702188	-1673.05
0.22676	0.0924347	-1678.61
0.0896585	0.127025	-1678.61
0.114706	0.108898	-1673.05
0.12826	0.101446	-1673.05
0.121604	0.0825044	-1675.83
0.196065	0.235228	-1672.02
0.203217	0.223297	-1670.27
0.159152	0.195212	-1670.27
-0.163139	-0.204469	-1598.61
-0.00383948	0.272078	-1597.67
0.0922316	0.282213	-1597.67
0.155858	0.212225	-1590.27
0.161713	0.125193	-1593.05
0.141409	0.0524307	-1593.05
0.115145	0.0822517	-1598.61
0.123068	0.0684033	-1593.05
0.106516	0.0696098	-1595.83
0.139356	0.117741	-1593.05
0.118287	0.127761	-1593.05
0.13097	0.140751	-1593.05
0.127703	0.17357	-1593.05
0.117567	0.153888	-1598.61
0.288166	-0.0217979	-1593.05
0.354131	-0.157885	-1598.61
0.195024	0.113104	-1593.05
-0.214723	-0.0100647	-1515.23
-0.148804	-0.245961	-1510.9
0.0439445	0.150873	-1514.19
0.0685739	0.0993741	-1513.58
0.108065	0.145408	-1511.62
0.2564	0.0817321	-1512.3
0.277408	0.0243854	-1512.24
-0.184222	0.134782	-1432.35
-0.107912	-0.125387	-1432.91
-0.208189	0.0931905	-1429.58
-0.240953	-0.267166	-1429.36
-0.140372	-0.188601	-1430.49
0.119675	0.102629	-1431.98
0.152609	0.0379251	-1431.84
0.155841	0.0497776	-1433.57
0.181914	0.101325	-1433.1
0.175262	0.0524366	-1431.02
0.203896	0.0885155	-1429.67
0.22026	0.0732785	-1429.02
0.237315	0.098502	-1431.59
0.259098	0.00807691	-1431.14
0.281765	0.0293835	-1430.82
0.344801	-0.00461076	-1432.46
0.336825	-0.204558	-1430.97
0.269361	-0.17352	-1427.7
0.0907115	0.239461	-1354.06
0.124697	0.184116	-1355.63
0.176684	0.104494	-1356.19
0.197016	0.248187	-1354.52
0.202086	0.106408	-1354.95
0.101336	0.20572	-1353
0.139812	0.221751	-1352.87
0.168197	0.20251	-1349.78
0.175059	0.183293	-1350.47
0.21892	0.0439028	-1355
0.151731	0.0429117	-1352.39
0.160445	0.0462665	-1352.22
0.170981	-0.0388027	-1352.06
0.195197	0.101827	-1354.23
0.199842	0.0682223	-1353.15
0.100283	0.074996	-1349.49
0.11861	0.103809	-1350.84
0.219403	0.0963168	-1350.99
0.230556	0.0913064	-1350.32
0.318182	0.046441	-1358.61
0.298333	0.0643823	-1349.62
0.288718	-0.133364	-1349.24
-0.0846583	-0.141508	-1278.61
-0.133272	-0.195984	-1278.61
-0.096371	-0.187544	-1272.3
0.159686	0.168272	-1278.61
0.161583	0.204312	-1278.61
0.178211	0.165091	-1278.61
0.185511	0.159448	-1278.61
0.210132	0.252117	-1276.41
0.1667	0.0759636	-1278.61
0.179885	0.0136048	-1278.61
0.211542	-0.0360715	-1278.61
0.173818	0.0436654	-1274.41
-0.158625	-0.197974	-1190.29
0.149134	0.1606	-1198.61
0.161583	0.140222	-1198.61
0.182123	0.135849	-1198.61
0.195785	0.138488	-1198.61
0.20455	0.159018	-1198.61
0.103079	0.1251	-1193.93
0.0880613	0.00788866	-1198.61
0.105702	0.00566543	-1198.61
0.122986	0.0439919	-1198.61
0.138875	0.103061	-1198.61
0.163158	0.10777	-1198.61
0.18585	0.0970652	-1198.61
0.220739	0.0264215	-1198.61
0.243596	0.059623	-1198.61
0.134506	0.0872868	-1195.49
0.197884	0.0366283	-1196.88
0.251497	0.0185927	-1196.08
0.170563	0.00658033	-1192.08
0.243414	0.0749365	-1194.39
0.265803	-0.0368595	-1198.61
0.270163	0.0265617	-1198.61
0.302056	-0.162583	-1192.2
0.306821	-0.362608	-1192.06
0.0733722	0.271985	-1118.61
0.107018	0.14225	-1114.24
0.114081	0.272302	-1113.09
0.302115	0.131125	-1113.62
0.168053	0.172474	-1110.23
0.176856	0.184186	-1108.91
0.261836	0.151442	-1109.1
0.277375	0.139464	-1109.87
0.196068	-0.060291	-1118.61
0.2243	0.00835439	-1114.61
0.256682	0.0948397	-1114.51
0.190755	0.0722271	-1114.06
0.210579	-0.0649448	-1114.37
0.236383	0.064014	-1112.84
0.0181254	0.049117	-1101.93
0.150379	0.102395	-1107.29
0.211243	0.102813	-1107.96
0.25759	-0.0692344	-1108.07
0.2911	0.113945	-1106.97
0.178794	0.103548	-1104.44
0.3043	0.105605	-1103.83
0.141667	0.063134	-1101.93
0.323139	0.134191	-1107.13
0.0279372	0.15082	-1036.6
0.0126717	0.0335032	-1036.86
0.0600337	0.0269975	-1031.82
0.033612	0.0295936	-1029.8
0.224327	0.222282	-1032.38
0.225793	-0.0458304	-1038.61
0.191055	0.0760189	-1035.69
0.171581	0.0386467	-1033.07
0.171762	0.0251101	-1034.01
0.184529	0.114901	-1031.73
0.23522	0.0308869	-1030.31
0.306729	0.101594	-1030.54
0.312871	-0.00187411	-1031.27
0.349457	0.051688	-1031.3
0.232366	0.198127	-1027.41
0.223218	0.135447	-1025.21
0.237914	0.132905	-1025.57
0.309101	0.130306	-1023.57
0.189314	-0.00861004	-1021.93
0.260219	0.082538	-1021.93
0.346638	0.0863414	-1024.95
0.362728	-0.257197	-1021.93
-0.220159	0.0462966	-953.953
0.0774804	0.282269	-958.61
0.116856	0.167921	-958.61
0.135413	0.151454	-955.457
0.250288	0.186537	-952.462
0.172087	0.175406	-950.181
0.158236	0.0701805	-958.61
0.168286	0.0902121	-958.61
0.181582	0.0208406	-958.61
0.230018	0.0602243	-958.61
0.240147	0.0299117	-958.61
0.282249	0.0902201	-955.59
0.156542	0.0506354	-950.72
0.278511	0.00851499	-950.906
0.256269	-0.209713	-958.61
0.235699	-0.296498	-955.177
0.279603	-0.104173	-951.728
0.300176	0.173853	-948.942
0.300932	0.0744859	-951.754
0.310846	0.0862478	-952.968
0.30116	0.128845	-949.121
0.316394	0.156388	-950.433
0.373701	-0.20158	-958.61
0.340252	-0.144319	-956.601
0.237846	0.120804	-947.597
0.273751	0.148986	-947.739
0.364411	-0.339867	-944.337
-0.0949347	-0.175005	-869.966
0.0770116	0.280484	-878.61
0.0809215	0.243617	-878.61
0.129527	0.226841	-878.61
0.180305	0.210094	-878.61
0.115581	0.196166	-872.67
0.229472	0.223586	-869.512
0.0941085	0.0140084	-878.61
0.144918	0.0469835	-878.61
0.170873	0.0711101	-878.61
0.189912	0.0765756	-878.61
0.206987	-0.0804685	-878.61
0.210514	0.0221444	-878.61
0.122989	0.102511	-874.282
0.144561	0.0834461	-873.563
0.132139	0.0563713	-871.14
0.184162	0.111189	-871.191
0.242908	0.205479	-870.456
0.265847	0.0701681	-878.61
0.283892	0.0746282	-878.61
0.285214	0.041428	-872.333
0.274039	-0.187447	-878.61
0.316907	-0.13073	-878.61
0.318325	-0.116902	-878.61
0.31009	-0.42688	-878.61
-0.200451	-0.106782	-795.375
-0.143404	-0.158016	-798.61
0.191356	0.169029	-795.861
0.101853	0.190216	-794.199
0.136119	0.255613	-792.68
0.121251	0.227967	-790.684
0.166818	0.164614	-790.574
0.123532	0.0647498	-798.61
0.133674	0.0026315	-798.61
0.156803	0.0743602	-798.61
0.169409	0.140141	-798.61
0.165757	0.0563716	-794.159
0.169776	0.116618	-794.188
0.202765	0.000276771	-793.524
0.232136	0.0645833	-791.675
0.187398	0.0637125	-791.086
0.248637	-0.0557436	-793.984
0.348524	0.115347	-790.275
0.330663	-0.135697	-790.331
0.0480794	0.0863118	-786.961
0.0649933	0.241012	-786.52
0.113311	0.158374	-787.177
0.119414	0.1175	-788.777
0.23766	0.115954	-783.884
0.259108	-0.0516834	-788.55
0.30343	0.081794	-787.731
0.0366378	0.0148348	-709.743
-0.149458	-0.108033	-718.61
-0.0691977	-0.12822	-718.61
0.134672	0.16042	-718.61
0.233321	0.191946	-718.61
0.0501298	0.154324	-712.755
0.0613816	0.155764	-712.748
0.204264	0.1751	-712.56
0.066249	0.0692966	-718.61
0.17504	0.0166758	-718.61
0.0497983	0.0295175	-715.593
0.0640705	0.0231896	-715.281
0.0826162	0.131738	-713.213
0.149073	0.0710981	-712.931
0.152956	0.0550634	-711.031
0.197189	-0.0272582	-711.3
0.199387	-0.323639	-713.586
0.26254	0.131956	-713.213
0.243537	-0.0613633	-715.334
0.241931	0.00773056	-712.893
0.337422	0.0820306	-712.405
0.22097	-0.290661	-712.033
0.265525	-0.361231	-710.727
0.273479	-0.367479	-710.901
0.0695877	0.345391	-708.105
0.191199	0.127875	-707.979
0.298363	0.129958	-708.319
0.392881	-0.362934	-701.93
0.145956	0.125445	-638.61
0.140847	0.0381072	-635.283
0.0911793	0.181295	-634.072
0.154076	0.0842646	-629.498
0.199644	0.150102	-633.539
0.199402	0.0749947	-631.294
0.225267	0.113834	-631.575
0.24333	0.0463213	-630.152
0.220556	-0.0885966	-637.165
0.274593	-0.100939	-635.314
0.37006	-0.0976762	-636.966
0.233053	-0.124745	-630.403
0.320064	-0.376306	-631.367
0.265973	0.0569195	-623.688
0.242773	-0.0284619	-621.93
0.285936	-0.0968212	-627.367
-0.146508	-0.138359	-550.606
0.0492463	0.197714	-558.61
0.0687138	0.19753	-558.61
0.0913458	0.147494	-558.61
0.116345	0.0904919	-558.61
0.15461	0.0750571	-558.61
0.155563	0.136105	-558.61
0.144438	0.0584899	-556.918
0.182324	-0.0341198	-558.61
0.227977	0.0923015	-558.61
0.260665	0.100258	-558.61
0.301077	0.0407834	-558.61
0.314713	0.0167206	-558.61
0.191045	0.0544276	-555.945
0.249413	-0.0235289	-550.906
0.288553	-0.275179	-557.028
0.222862	-0.115388	-552.011
0.2585	-0.117872	-553.176
0.376872	-0.0546104	-554.847
-0.16311	-0.25141	-475.379
-0.150196	-0.252756	-473.333
0.0831182	0.155902	-478.61
0.049493	0.0327268	-478.61
0.0992787	0.0754381	-478.61
0.103119	0.10371	-478.61
0.111237	0.210567	-478.61
0.11655	0.11181	-478.61
0.131801	0.0998233	-478.61
0.152262	0.13153	-478.61
0.221495	0.10824	-478.61
0.212872	0.0066631	-472.028
0.294527	0.0346927	-472.897
0.190046	0.0755272	-469.678
0.217839	-0.0835487	-469.607
0.23045	-0.148041	-478.61
0.321714	-0.00444404	-472.561
0.309587	-0.272079	-464.615
-0.12014	-0.076642	-389.907
0.113945	0.203853	-398.61
0.163039	0.215554	-398.61
0.190348	0.213923	-394.592
0.0935463	0.184837	-394.057
0.148937	0.00886433	-398.61
0.20832	0.0861453	-398.61
0.191954	0.119497	-395.049
0.0906899	0.0883296	-392.985
0.197372	0.107053	-392.061
0.197519	0.0376594	-392.525
0.221951	0.10443	-392.448
0.125513	0.0582761	-391.392
0.165366	0.0617554	-391.103
0.29944	0.0486401	-398.61
0.316288	-0.00550179	-398.61
0.360225	-0.0751569	-398.61
0.361412	-0.187606	-398.61
-0.128162	-0.148324	-311.333
0.0753728	0.147542	-318.61
0.147266	0.2484	-318.61
0.152907	0.135356	-318.61
0.172616	0.156296	-318.61
0.236321	0.232414	-318.61
0.182463	0.135245	-315.279
0.189548	0.178569	-313.399
0.107526	0.0991546	-318.61
0.116455	0.0859484	-318.61
0.155506	0.0573366	-318.61
0.193832	-0.0706829	-314.876
0.127352	0.0178993	-311.787
0.327041	0.0309981	-318.61
0.302756	0.0164973	-313.1
0.267728	-0.0933419	-310.231
0.301233	-0.256337	-311.795
0.274419	-0.199419	-309.502
0.183886	0.160592	-234.677
0.20507	0.17668	-232.794
0.119579	0.128552	-230.241
0.212644	0.151329	-230.78
0.220214	0.190928	-230.629
0.0771008	0.0703307	-230.583
0.177834	0.0353329	-231.161
0.194872	-0.145273	-234.546
0.340276	0.00349518	-232.361
0.258614	-0.189884	-233.231
-0.0969586	-0.180532	-228.205
0.0813376	0.199136	-228.333
0.160909	0.274614	-227.916
0.189047	0.132479	-228.567
0.248508	0.0996735	-224.225
-0.108373	-0.116753	-150.6
0.137119	0.168097	-152.339
0.205094	0.247826	-149.516
0.121751	0.0978088	-150.236
0.131583	0.0994844	-150.286
0.210094	0.1155	-150.474
0.23157	0.0043603	-152.648
0.316639	-0.0478897	-153.346
0.292278	0.00904022	-149.185
0.123883	0.251018	-145.604
0.227047	0.149946	-145.328
0.05401	0.145457	-141.93
0.144927	0.159957	-141.93
0.226488	0.250202	-141.93
0.142507	0.0339293	-143.916
0.188147	-0.0082191	-145.194
0.159388	0.000944563	-141.93
0.244601	0.179423	-146.322
0.291	0.071485	-141.93
0.0507917	0.154057	-71.8739
0.111917	0.209087	-77.0455
0.129246	0.210667	-74.5653
0.124432	0.128525	-74.059
0.148933	0.139085	-72.3906
0.158512	0.1253	-71.6745
0.185241	0.117012	-72.2797
0.20196	0.2406	-73.5827
0.249955	0.133338	-72.8254
0.115426	0.194718	-70.4184
0.189103	0.131951	-71.106
0.267483	0.228696	-71.0736
0.177784	0.0428146	-78.61
0.262394	-0.0713469	-70.2108
0.266013	-0.236204	-73.447
0.299444	0.150111	-70.9587
0.361091	-0.342371	-72.7476
0.364018	-0.406499	-73.5424
0.383119	-0.408747	-72.4261
0.403362	-0.225317	-71.837
0.420177	-0.23847	-69.321
0.00353758	-0.0585477	-67.3245
-0.0135053	-0.0752959	-61.93
0.164372	0.246592	-67.3882
0.267838	0.148102	-68.4221
0.288103	0.115047	-64.9813
0.163374	-0.262414	-61.93
0.37136	-0.390263	-67.9275
0.0767373	0.212871	5.92993
0.0977784	0.141465	8.11952
0.103123	0.19466	7.78438
0.146761	0.0484996	5.70328
0.150667	0.126214	7.21783
0.228738	0.12917	10.2882
0.234995	0.163412	8.96146
0.194574	0.0516684	7.71244
0.201325	-0.0584884	8.32591
0.205509	0.0864973	10.0732
0.221185	-0.047674	10.339
0.222453	-0.185214	7.02819
0.229994	-0.31224	7.49631
-0.207498	-0.26721	18.07
-0.164176	-0.221878	11.7448
-0.109709	-0.230385	15.0829
-0.191757	-0.26203	18.07
0.192295	0.120881	13.4917
0.309125	0.153281	13.0822
0.210204	0.0659682	11.8376
0.32881	-0.063813	14.9286
0.319678	-0.32584	14.4372
-0.110299	0.0198061	90.5341
-0.148141	-0.15835	88.346
0.048523	0.236476	86.8535
0.102176	0.193102	89.3888
0.0732863	0.063383	81.39
0.108978	0.0658666	81.39
0.0796645	0.101772	86.4728
0.0947602	0.0937997	87.6115
0.109014	-0.0248262	87.6299
0.129924	0.0705803	86.393
0.0688089	0.0116905	90.5455
0.112176	0.105459	88.5653
0.143102	0.04073	89.2692
0.180489	0.129591	85.5314
0.174782	0.143723	87.844
0.17774	0.179373	90.0384
0.236586	0.152098	90.9491
0.294378	0.096183	89.8567
0.31848	-0.0352585	81.39
0.206055	-0.337105	89.7177
0.262109	-0.349926	90.7869
0.329599	-0.0446588	87.4006
0.337451	-0.0258263	87.3786
0.0283543	0.0149796	92.6823
0.134109	0.106141	93.0647
0.0072565	-0.0515876	95.9755
0.158291	-0.0229787	95.2206
0.18298	0.168045	93.8843
0.227188	0.231268	93.0257
0.221157	0.130519	95.0599
0.17532	0.0441647	94.7174
0.230978	0.0687682	98.07
0.225348	-0.283233	98.07
-0.181273	0.0221083	161.39
-0.177533	0.0372871	161.39
0.00109005	-0.065802	161.39
-0.153407	-0.183318	165.977
-0.14628	-0.189881	168.561
0.0885257	0.216406	161.39
0.194328	0.134393	161.39
0.208034	0.175614	161.39
0.0905954	0.183914	163.331
0.195803	0.162843	166.218
0.196615	0.215595	169.615
0.129702	0.0938097	161.39
0.141583	0.051624	161.39
0.204081	0.0291885	161.39
0.0836865	-0.211358	161.39
0.233909	0.171158	161.39
0.235789	0.1394	161.39
0.290905	0.0793277	167.89
0.27257	-0.0482042	169.314
0.36912	-0.204133	162.929
0.190319	0.145829	247.197
0.0364603	0.0304776	241.39
0.0442932	0.0741191	241.39
0.17204	0.0371428	247.763
0.181893	0.0727042	246.019
0.186729	0.102695	247.867
0.191787	0.0062405	246.936
0.197289	0.118912	247.377
0.217489	0.0879817	246.113
0.132434	-0.172076	246.288
0.256825	0.0365056	246.238
0.307718	0.0110821	247.985
0.243834	-0.0123149	249.937
0.323361	0.0415702	249.486
0.403379	-0.156639	247.776
0.356243	-0.373163	248.425
-0.349518	0.200899	254.283
0.0169914	0.0278621	256.485
0.0925265	0.0611413	252.857
0.101576	0.119201	252.401
0.223367	0.112437	251.803
0.308045	0.150751	254.251
0.261191	-0.0889961	254.663
0.257914	-0.255199	252.506
-0.139748	-0.227262	321.39
-0.122067	-0.246837	321.39
-0.120363	-0.21768	327.689
-0.121761	-0.198144	330.602
0.119424	0.132226	321.39
0.127472	0.169292	321.39
0.10844	0.193739	324.631
0.0735312	0.102591	321.39
0.0927681	0.0910355	321.39
0.103959	0.119863	321.39
0.124309	0.106999	321.39
0.132641	0.0717513	321.39
0.139377	0.0457439	321.39
0.172742	0.16987	321.39
0.200694	0.180735	321.39
0.229673	0.156907	326.397
0.157691	0.0359691	321.39
0.164328	0.0697025	321.39
0.20941	0.106773	321.39
0.21431	0.127342	321.39
0.276632	0.0906806	321.39
0.165886	0.0973067	325.219
0.189728	0.0467659	327.348
0.146211	0.0951621	328.457
0.224661	-0.116198	321.39
0.291717	-0.356363	321.39
0.329504	0.0433424	321.39
0.370543	0.106324	321.39
0.393698	-0.187565	321.39
-0.117752	-0.176091	401.39
-0.122823	-0.147335	406.086
-0.0999934	-0.150899	406.684
0.0557442	0.190985	401.39
0.13405	0.172278	401.39
0.0634169	0.154757	403.133
0.0677657	0.0942068	401.39
0.0912004	0.0257999	401.39
0.153747	0.0336212	401.39
0.16555	0.0729623	401.39
0.175688	0.0262437	401.39
0.0870619	0.0451671	404.476
0.165058	0.136193	404.188
0.19933	0.174414	401.39
0.199663	0.0744795	401.39
0.215159	0.0335941	401.39
0.215817	0.125475	401.39
0.238712	0.117751	401.39
0.276316	0.0718061	401.39
0.287335	-0.0121026	401.39
0.276006	0.0174571	404.244
0.257709	-0.241602	401.39
0.308031	-0.232243	401.39
0.217163	-0.201187	404.15
0.304596	-0.349708	401.39
0.386164	-0.0641033	401.39
-0.124125	-0.1209	481.39
0.13164	0.212178	481.39
0.163228	0.195411	481.39
0.053259	0.168506	481.39
0.0721967	0.160551	481.39
0.0944795	0.124049	481.39
0.109226	0.0492484	481.39
0.11264	0.161093	481.39
0.12371	0.168165	481.39
0.129843	0.0356938	481.39
0.167653	0.0201023	481.39
0.167942	0.0579879	481.39
0.16985	0.080507	481.39
0.170913	0.131546	481.39
0.174927	0.118618	481.39
0.18966	-0.0186585	481.39
0.114293	-0.110758	481.39
0.170375	-0.146013	481.39
0.187499	0.112333	481.39
0.195308	0.0599429	481.39
0.204399	0.0517256	481.39
0.211968	-0.00249357	481.39
0.223404	0.0683374	481.39
0.196114	-0.0526571	481.39
0.211172	-0.175891	481.39
0.249385	-0.327051	481.39
0.248691	-0.0651318	481.39
-0.220383	-0.263967	561.39
0.0504781	0.175023	561.39
0.0812883	0.198532	561.39
0.0875603	0.189429	561.39
0.0940082	0.215908	561.39
0.108836	0.207569	561.39
-0.00813359	-0.0874773	561.39
0.045572	0.0102278	561.39
0.0515126	-0.00802263	561.39
0.0642316	0.030122	561.39
0.0796762	0.077761	561.39
0.108788	0.123274	561.39
0.111202	0.0326046	561.39
0.166168	0.360431	561.39
0.12181	0.19971	561.39
0.128922	0.328177	561.39
0.137686	0.175133	561.39
0.184944	0.178185	561.39
0.198016	0.155852	561.39
0.232279	0.209632	561.39
0.133291	0.0464699	561.39
0.140983	0.132992	561.39
0.146741	0.075022	561.39
0.163909	0.058591	561.39
0.181148	0.139229	561.39
0.183553	-0.00708865	561.39
0.187335	0.0868301	561.39
0.20506	0.11975	561.39
0.214809	-0.0881007	561.39
0.22491	-0.0201316	561.39
0.225689	0.0765514	561.39
0.265496	0.0929588	561.39
0.150933	-0.284407	561.39
0.212044	-0.2443	561.39
0.29544	-0.135932	561.39
0.339139	-0.192958	561.39
-0.0360591	-0.0908131	645.327
-0.0521705	-0.117034	647.284
-0.0635648	-0.137202	649.056
-0.108443	-0.176974	645.929
0.0954266	0.0470993	641.39
0.0889573	0.0766074	643.257
-0.00277875	0.0655186	647.701
0.0444704	0.0167134	651.032
0.0754438	0.0344269	648.561
0.0823365	0.0845374	650.132
0.147567	0.0230541	651.058
0.240188	0.145333	647.518
0.193913	0.116543	650.337
0.215498	0.124688	648.979
0.238092	0.100052	650.191
0.305789	-0.0340684	641.39
0.27998	0.0479458	648.223
0.218233	-0.0799291	649.651
0.235646	-0.28285	647.384
0.219813	-0.319314	649.899
0.33565	-0.135399	641.39
0.363429	-0.0454372	646.142
-0.191776	-0.0770256	651.471
0.0514177	0.138113	652.701
0.0750901	0.1873	651.637
0.106603	0.0249178	651.957
0.144479	-0.0240075	651.779
0.210576	0.170344	651.986
0.249074	0.173799	651.597
0.161465	-0.053784	652.371
-0.163816	-0.00461078	727.239
0.13816	0.0757518	721.39
0.173386	0.0944395	724.752
0.0131648	-0.0124988	727.069
0.071176	0.106296	726.869
0.117501	0.0329634	726.973
0.155254	0.0139517	726.17
0.0727324	0.035695	729.552
0.124987	0.0434578	729.967
0.175019	0.0153623	728.885
0.247183	0.137735	727.488
0.206253	0.0472606	728.203
0.211569	0.0317813	725.675
0.275424	0.0814201	726.922
0.291383	0.115573	728.808
0.328773	-0.302118	727.043
0.221499	-0.23903	729.812
0.286098	-0.276951	730.635
-0.200355	-0.187202	735.129
0.0591403	0.0135482	731.909
0.21246	0.142769	731.656
0.209625	0.0888302	731.499
-0.228533	0.17982	810.248
-0.288164	-0.12794	810.454
0.0867852	0.105914	801.39
0.116288	0.0973008	801.39
0.116231	0.0314082	801.39
0.151301	0.0144495	801.39
0.0831179	0.0726726	806.469
0.175182	0.124209	808.269
0.181957	-0.10315	808.706
0.208536	0.131654	806.283
0.222322	0.190409	807.789
0.248548	0.141318	806.221
0.199999	0.093401	801.39
0.25087	0.0131164	801.39
0.195511	0.0585266	804.275
0.217266	-0.0828722	807.398
0.228788	0.110492	805.967
0.252254	0.0846887	805.756
0.242761	-0.137642	807.951
-0.129	-0.146845	881.39
-0.0894931	-0.164582	887.336
0.17514	0.15783	881.39
0.207088	0.129337	881.39
0.229712	0.187077	881.39
0.218417	0.264259	886.806
0.223978	0.154804	887.536
0.118008	0.103712	881.39
0.113823	-0.0293988	881.39
0.2015	0.0718906	881.39
0.213594	0.0540615	881.39
0.214037	-0.00563471	881.39
0.170995	0.0373251	885.881
0.153692	0.0994325	889.093
0.192221	-0.231685	881.39
0.228455	0.108763	881.39
0.232946	0.142253	881.39
0.247511	-0.0259753	881.39
0.257147	-0.0941587	881.39
0.234783	0.0531662	887.346
0.284454	0.0376214	889.711
0.267398	-0.334006	884.068
0.323512	-0.385125	882.891
-0.0310566	-0.0214155	893.026
-0.128753	-0.224041	969.335
0.0834455	0.158973	961.39
0.0597439	0.0236764	961.39
0.105782	0.0230929	964.871
0.110856	-0.259947	963.717
0.167237	0.117236	965.855
0.187274	0.242735	967.978
0.175972	0.17846	970.852
0.276982	0.123675	969.57
0.173955	0.094656	961.39
0.242527	0.0943277	961.39
0.160094	0.0499289	964.477
0.192991	0.0952775	963.15
0.202988	0.0751924	967.279
0.28681	0.0848822	967.651
0.137098	0.0666891	968.989
0.199229	-0.201097	961.39
0.210698	-0.25373	963.65
-0.247108	-0.295034	971.476
0.158323	0.141537	973.068
0.247498	0.174389	972.404
0.0509665	0.157195	1041.39
0.0685626	0.136677	1041.39
0.0792822	0.17794	1041.39
0.110073	0.198944	1043.25
0.0868153	0.115545	1041.39
0.0947329	0.0113375	1041.39
0.121697	0.0166273	1047.84
-0.00617465	0.047029	1049.37
0.195205	0.156996	1048.16
0.25417	0.125401	1047.01
0.182301	0.170599	1049.32
0.230929	0.149798	1049.97
0.179008	0.0874802	1041.39
0.186617	0.0550462	1041.39
0.211069	0.115709	1041.39
0.242098	0.0711364	1041.39
0.247498	0.00896307	1041.39
0.272301	0.0469866	1041.39
0.330665	0.0379616	1041.39
0.231232	-0.0261617	1043.13
0.257243	0.110607	1046.77
0.172119	-0.0427941	1049.9
0.201661	0.0938961	1049.55
0.26025	-0.177799	1041.39
0.350448	-0.340325	1041.39
0.370398	-0.343427	1041.39
-0.192302	-0.106874	1127.7
0.0940565	0.108591	1121.39
0.100216	0.168348	1121.39
0.120406	0.141671	1128.58
0.193026	0.186478	1129.06
0.0167323	-0.0725751	1121.39
0.0383677	-0.0330828	1121.39
0.0660867	-0.0442034	1121.39
0.0928301	0.000346768	1121.39
0.132462	0.0560108	1121.39
0.161416	-0.00223372	1121.39
0.043375	-0.00402987	1125.52
0.0657992	-0.0175475	1127.64
0.163679	-0.0378589	1127.81
0.198535	0.114764	1121.39
0.219955	0.11086	1121.39
0.237296	0.142519	1121.39
0.21582	0.139702	1126.79
0.215736	-0.105981	1121.39
0.291093	-0.0176575	1121.39
0.356385	-0.143864	1121.39
0.228679	-0.257744	1121.39
0.255648	-0.263114	1121.39
-0.189454	-0.161896	1201.39
0.0780524	0.183988	1203.06
0.167503	0.179612	1204.84
0.162647	0.204848	1209.9
0.0929109	0.00378909	1201.39
0.284445	-0.0530008	1201.39
0.192121	0.134551	1204.64
0.319335	-0.0294597	1204.34
0.213414	-0.0847594	1208.28
0.296249	-0.0461232	1207.08
0.207365	0.0946037	1210.33
0.251513	0.139881	1209.9
0.263369	0.132446	1210.41
0.251838	-0.245224	1209.91
0.201962	-0.0464302	1212.52
0.194598	0.0711599	1215.34
0.260873	0.0902363	1218.07
0.265637	-0.0404553	1218.07
0.361162	-0.201567	1218.07
-0.0746021	-0.0552323	1281.39
0.0900683	0.117891	1281.39
0.104765	0.198868	1281.39
0.180416	0.130722	1287.31
0.189561	0.201108	1286.22
0.192625	0.116512	1288.11
0.208765	0.237665	1289.65
0.01315	-0.0602824	1281.39
0.129558	0.0973176	1285.3
0.102149	0.0875168	1290.36
0.237824	0.0127433	1283.74
0.206643	0.0864187	1286.37
0.231684	0.0529189	1288.29
0.217948	-0.118155	1290.42
0.380856	-0.156656	1288.11
0.136445	-0.0675271	1293.07
0.212932	0.165407	1291.7
0.221881	0.155617	1291.38
-0.0730713	-0.121193	1369.98
0.105813	0.140998	1361.39
0.162393	0.153841	1361.39
0.196909	0.140603	1364.47
0.210468	0.131742	1368.09
0.198707	0.104651	1365.54
0.237122	0.0529614	1369.07
0.165819	0.238948	1376.33
0.198733	0.163165	1378.07
0.119472	0.0843177	1373.35
0.195052	-0.043963	1371.72
0.197595	0.0420346	1378.07
0.212512	0.109323	1378.07
0.242775	0.00477078	1373.27
0.273721	0.0475476	1371.99
-0.0521007	-0.0546134	1450.27
0.0836359	0.167318	1443.74
0.135001	0.122824	1446.02
0.182802	0.156515	1450.31
0.121389	0.085291	1442.87
0.0448753	0.0106996	1446.05
0.238291	0.138705	1447.32
0.19188	0.171624	1449.98
0.234628	0.15831	1449.03
0.33302	-0.0851262	1449.76
-0.197592	-0.203003	1452.3
0.198431	0.204147	1451.91
0.291383	-0.0353873	1451.88
0.228852	0.0900384	1455.63
0.259974	-0.198938	1454.92
-0.196264	-0.302585	1526.21
0.140595	0.141365	1526.65
0.0983246	0.208266	1530.39
0.152732	0.13812	1529.39
0.0814019	-0.0142809	1521.39
0.12654	-0.0466469	1527.27
0.13895	0.00706408	1526.84
0.0381474	0.0406952	1531.01
0.115237	0.0602668	1530.19
0.21477	0.157758	1529.85
0.204523	0.118096	1523.7
0.247505	0.0123287	1526.66
0.0672535	-0.00912035	1532.87
0.108931	-0.00479668	1532.53
0.178286	-0.101287	1533.09
0.166137	0.0702771	1534.64
0.224106	0.246176	1531.16
0.266064	-0.0310531	1531.3
0.330599	-0.00350888	1531.86
-0.133384	-0.100744	1606.23
-0.13156	-0.152747	1605.69
0.0893473	0.226428	1608.42
0.0708355	0.00371525	1601.39
0.0975106	0.0056274	1601.39
0.098178	0.0323219	1601.39
0.12538	-0.0550819	1601.39
0.134552	-0.0265734	1601.39
0.141164	-0.0593029	1601.39
0.157981	-0.0499789	1601.39
0.161734	-0.0158797	1601.39
0.172516	0.0274469	1601.39
0.176973	-0.0389354	1605.44
0.113287	-0.00501995	1605.78
0.0767149	-0.0338186	1609.12
0.186029	0.12289	1610.17
0.177058	-0.0896274	1608.04
0.27037	0.0607663	1601.39
0.316743	-0.0521812	1601.39
0.258838	-0.00322194	1604.65
0.277114	0.0127255	1603.35
0.212485	0.131074	1605.97
0.234007	0.162942	1607.29
0.213299	0.0218878	1611.06
0.256165	-0.289826	1606.83
0.409037	-0.1982	1609.62
0.241296	0.142157	1612.1
-0.187721	-0.223594	1681.39
0.0153095	-0.0241469	1684.66
0.0313942	-0.0416142	1681.39
0.102877	0.138834	1681.39
0.124435	0.151764	1681.39
0.195988	0.102799	1681.39
0.128976	0.136647	1686.21
0.173553	0.135903	1690.36
0.29751	0.0338728	1689.15
0.346803	-0.102566	1683.77
0.159482	0.000102967	1693.09
0.207394	-0.0176303	1695.15
0.231428	0.136536	1691.47
-0.193181	-0.147976	1761.39
-0.160652	-0.13396	1761.39
0.148462	0.162573	1761.39
0.165049	0.165248	1761.39
0.172578	0.0519711	1761.39
0.173092	0.131647	1761.39
0.177681	0.081171	1761.39
0.213507	0.0197733	1761.39
0.313425	-0.0293807	1761.39
0.327118	-0.262511	1761.39
0.397304	-0.192756	1761.39
0.398024	-0.148025	1761.39
-0.249155	0.130669	1841.39
-0.219535	-0.202862	1841.39
-0.204869	-0.183631	1841.39
-0.109056	-0.147992	1841.39
-0.0723028	-0.222058	1841.39
0.203514	0.253687	1847.96
0.199701	0.177829	1841.39
0.211789	0.125538	1841.39
0.210439	0.179451	1841.39
0.134959	-0.00189443	1843.57
0.227	0.140684	1846.26
0.0696198	-0.145527	1841.39
0.0906098	-0.174157	1841.39
0.21711	-0.13257	1841.39
0.27006	0.0753157	1841.39
0.275045	0.0345633	1841.39
0.298586	0.0208224	1841.39
0.366909	-0.0830425	1843.9
0.385717	-0.161665	1847.52
0.281069	-0.329495	1846.23
-0.0943859	-0.206947	1921.39
0.180099	0.222989	1929.65
0.0522843	0.0307873	1921.39
0.057477	0.02067	1921.39
0.0706413	0.0441497	1921.39
0.0767833	0.158846	1921.39
0.0858817	0.134231	1921.39
0.158571	-0.0398614	1921.39
0.162427	0.0123682	1921.39
0.198711	0.130373	1921.39
0.112307	0.128625	1925.46
0.0875128	-0.130743	1923.04
0.26415	0.015581	1921.39
0.285334	-0.0288324	1921.39
0.284381	0.0445473	1923.14
0.25697	0.0395642	1929.41
0.326401	-0.0515173	1929.48
0.304569	-0.230597	1926.69
0.416286	-0.158683	1923.75

## Sheet: Sheet2
0.36703	0.0526237	-1838.61
0.401239	-0.172678	-1198.61
0.396453	-0.100643	-878.61
0.376832	-0.0741566	-795.83
0.363157	-0.319461	-793.05
0.344218	-0.0278166	-638.61
0.33344	-0.0595849	-478.61
0.376873	-0.0954451	-467.49
0.350999	-0.0539543	-318.61
0.358826	-0.0896537	-223.912
0.352692	-0.244674	-223.47
0.324695	-0.0288909	-153.05
0.342706	-0.045139	-157.892
0.366999	-0.104455	-157.788
0.395918	-0.0472388	-75.83
0.404306	-0.0785435	-75.83
0.394025	-0.104098	-73.05
0.400584	-0.334362	-73.05
0.364642	-0.0825729	1.7417
0.36292	-0.177974	16.5503
0.325006	-0.365234	17.9038
0.310076	-0.202178	9.73
0.36495	-0.113148	97.5103
0.337192	-0.0731948	161.39
0.354257	-0.106513	164.17
0.342805	-0.0175953	243.503
0.371699	-0.095484	321.545
0.340924	-0.0542736	321.39
0.312339	-0.0529831	321.39
0.320576	-0.09886	321.39
0.34104	-0.113302	321.39
0.339512	-0.00968685	401.716
0.319984	-0.165534	401.39
0.280772	-0.0297182	561.39
0.317141	-0.0747696	563.134
0.362625	-0.156876	642.233
0.26292	-0.286948	646.95
0.356319	-0.155866	735.856
0.31653	-0.302509	732.51
0.329834	-0.0855086	804.17
0.362238	-0.158008	963.173
