# Supplementary material for: Spinal premotor interneurons controlling antagonistic muscles are spatially intermingled
Source: eLife. 2022 Dec 13;11:e81976. doi: 10.7554/eLife.81976 (PMC9844990; doi:10.7554/eLife.81976)
Supplement: Figure 12—figure supplement 1—source data 5. [file elife-81976-fig12-figsupp1-data5.xlsx]

## Sheet: Sheet1
-0.100888	-0.137919	-1585.8
-0.239866	-0.140037	-1591.89
0.122897	0.229487	-1597.3
0.0577089	0.0550373	-1590.72
0.161952	0.121854	-1591.18
0.217458	0.00987376	-1590.31
0.293794	0.013336	-1592.95
0.269795	-0.00919892	-1513.05
0.313922	-0.16785	-1513.05
0.288305	-0.164875	-1515.83
-0.176526	-0.184106	-1433.05
0.225076	0.118382	-1430.27
0.127269	0.188861	-1435.83
0.310066	0.0851847	-1435.83
0.00851818	0.0753349	-1344.71
0.211589	0.171086	-1350.27
0.163276	0.0745625	-1350.27
0.174965	0.0771532	-1350.27
0.112149	0.0977132	-1355.83
0.280004	0.0568732	-1347.49
0.128423	0.0718891	-1275.83
0.168966	0.00173268	-1275.83
0.211204	-0.0885859	-1273.05
-0.104211	-0.212359	-1273.05
-0.124968	-0.164465	-1273.05
-0.207475	-0.26437	-1195.83
0.199931	0.0492156	-1193.05
0.186031	0.0257491	-1190.27
0.287055	-0.0577728	-1193.05
0.208559	0.00553764	-1195.83
0.201383	-0.0619756	-1195.83
0.169185	-0.00959179	-1115.83
0.152877	-0.0537431	-1110.27
0.18216	0.0790898	-1110.27
-0.163651	-0.289351	-1113.05
-0.118863	-0.12858	-1110.27
0.259215	-0.0123051	-1118.61
0.164122	0.0829513	-1110.27
-0.188227	-0.193901	-1033.05
-0.0618187	-0.192622	-1027.49
0.256201	-0.123469	-1033.05
0.245508	-0.0359338	-1035.83
0.206461	0.0625644	-1033.05
0.152597	0.155361	-1030.27
0.27105	-0.142796	-1033.05
0.178238	0.120976	-950.27
0.332515	-0.196551	-950.27
0.319435	-0.215997	-947.49
0.215505	-0.0526254	-950.27
0.236242	0.0357061	-953.05
0.171445	0.0558818	-953.05
0.163191	0.0472622	-955.83
0.137944	0.0506577	-955.83
0.142715	0.158059	-953.05
0.0684031	0.176908	-873.05
0.116609	0.154109	-873.05
0.194281	0.0623936	-870.27
0.220766	-0.0818604	-873.05
-0.109761	-0.247377	-795.83
-0.119037	-0.233639	-795.83
0.119629	0.0386354	-795.83
0.0955566	0.118654	-790.27
0.284662	0.00481156	-793.05
0.147134	0.0551144	-790.27
0.220848	-0.168278	-790.27
0.249803	-0.165999	-790.27
0.357697	-0.381623	-793.05
0.332292	-0.116435	-711.347
0.199022	-0.339879	-708.768
0.350328	-0.0253079	-710.202
0.1395	0.0598108	-710.27
0.146845	0.146883	-715.83
0.0974911	0.184761	-713.05
0.248809	0.176512	-713.99
-0.156465	-0.1073	-709.98
-0.0810464	-0.18442	-704.71
0.0878779	0.105733	-715.83
0.187351	0.211662	-710.376
0.214509	0.0501647	-710.412
0.22513	0.0710757	-710.074
0.235541	-0.00576442	-713.57
0.109931	0.0445348	-710.27
0.126923	0.00943034	-713.05
0.0827939	0.208293	-710.27
0.189157	0.113909	-713.246
-0.132302	-0.159397	-634.765
0.0688193	0.0991243	-638.61
0.195864	0.132084	-638.61
0.181168	0.135155	-635.83
0.171776	0.13703	-638.61
0.165626	0.12052	-638.61
0.178409	0.105204	-638.61
0.093742	0.204116	-638.61
0.159843	0.0474517	-638.61
0.167286	0.029421	-636.255
0.113362	0.0235307	-638.61
0.203369	0.0222825	-637.563
0.226662	0.0624313	-638.61
0.198964	-0.0365969	-638.114
0.290088	0.0145837	-634.592
0.347901	-0.0241006	-637.826
0.0985967	0.0513819	-553.043
0.110888	0.100257	-547.482
0.103607	0.172513	-553.042
0.188311	-0.0545288	-550.256
0.302394	0.108519	-553.028
0.21587	0.123565	-550.254
0.20431	-0.361367	-547.475
0.219506	-0.203929	-470.27
0.241056	-0.198986	-467.49
0.189749	0.0341024	-470.27
0.199087	0.00806544	-470.27
0.216724	0.101387	-470.27
0.180818	0.119832	-470.27
0.149996	0.126974	-473.05
0.101455	0.147731	-473.05
0.14969	-0.0187573	-473.05
0.162751	0.016281	-470.27
0.189899	-0.0106206	-470.27
0.188022	0.0536815	-470.27
0.241048	0.183298	-387.49
0.220102	0.0988508	-390.27
0.173706	0.05037	-390.27
0.180062	0.0255637	-384.71
0.210812	0.00534586	-387.49
0.249849	-0.0532246	-393.05
0.199572	-0.228744	-384.71
0.146528	0.0222902	-395.83
0.122519	0.0328642	-381.93
0.204348	-0.0782728	-395.83
0.227427	0.14908	-393.05
0.272188	-0.146213	-313.05
0.154608	0.0111052	-307.49
0.131033	0.0152796	-315.83
0.12247	-0.00428765	-304.71
0.230638	0.0688562	-313.05
0.194662	0.138688	-301.93
0.214573	0.191415	-310.27
0.144213	0.1461	-307.49
0.113884	0.171194	-307.49
0.102004	0.174032	-304.71
0.093368	0.284558	-313.05
0.282148	-0.109067	-304.71
-0.163735	-0.139334	-227.49
0.114622	0.088509	-233.05
0.133168	0.121699	-233.05
0.107985	0.163575	-233.05
0.227635	0.229708	-224.71
0.213914	0.133355	-238.61
0.228935	0.11947	-227.49
0.258838	0.0711663	-235.83
0.286177	-0.267994	-230.27
0.0755667	0.0976922	-235.83
0.116423	0.00218459	-153.05
0.182776	0.00705618	-158.61
0.172383	-0.0337926	-150.27
0.16419	-0.268071	-155.83
0.317626	0.0400144	-147.49
0.210057	0.0750254	-153.05
0.196223	0.0858087	-153.05
0.233628	0.119398	-147.49
0.190005	0.14812	-147.49
0.190241	0.165051	-155.83
0.0738166	0.149462	-155.83
0.113273	0.0499031	-155.83
0.156421	0.148906	-155.83
0.232731	-0.33252	-67.49
0.198457	-0.29225	-64.71
0.268652	-0.362841	-61.93
0.156737	-0.0311622	-75.83
0.0559764	-0.0108687	-64.71
0.0268375	0.0316592	-75.83
0.029538	0.139489	-73.05
0.111244	0.0551406	-64.71
0.16257	0.059613	-70.27
0.175656	0.0827038	-75.83
0.213912	0.0894226	-70.27
0.199687	0.0368182	-75.83
0.17651	0.000627345	-73.05
0.162878	0.0150534	-75.83
0.152594	0.164832	-67.49
0.139828	0.156802	-73.05
0.121979	0.162076	-73.05
-0.137274	-0.0497098	-73.05
-0.090868	-0.0945551	-70.27
0.233192	0.131639	-64.71
0.339711	-0.260434	-67.49
0.197425	0.0135817	12.51
0.169383	-0.00586584	4.17
0.18776	-0.0214066	15.29
0.198121	0.0403892	6.95
0.23061	0.0861804	12.51
0.285846	0.217922	12.51
0.178928	0.131821	9.73001
0.172374	0.171111	9.73001
0.325177	-0.0428481	4.17
0.115783	0.156931	12.51
0.124561	0.341993	12.51
0.124543	0.0714549	4.17
-0.0981986	-0.221307	6.94999
0.19025	-0.27225	92.51
0.0737045	0.156362	89.73
0.0631564	0.207493	86.95
0.16008	0.141395	86.95
0.188636	0.120525	86.95
0.186451	0.0970043	89.73
0.162583	0.112122	84.17
0.114577	0.152837	84.17
0.0582198	0.0509606	84.17
0.149083	0.0541229	92.51
0.168575	0.0459676	86.95
0.158097	0.00716772	92.51
-0.132261	-0.146775	89.73
-0.0612704	-0.158546	92.51
0.2559	0.178078	86.95
0.192607	0.24227	84.17
0.0856268	0.171152	161.39
0.0729873	0.167673	161.39
0.24223	0.233231	166.95
0.183655	0.113513	161.39
0.0828146	0.0924283	161.39
0.142368	0.126965	172.51
0.162665	0.00386901	164.17
0.32905	-0.0118268	169.73
0.260076	-0.165066	169.73
0.24923	-0.315917	169.73
-0.0818524	-0.184833	172.51
0.085152	0.0682804	164.17
0.0983128	0.154172	166.95
0.214874	0.129121	175.29
0.252923	-0.331868	246.95
0.196333	-0.0340922	244.17
0.176946	-0.0338914	244.17
0.154557	0.0178687	249.73
0.125539	0.0558118	246.95
0.087467	0.164826	241.39
0.0496407	0.138701	246.95
-0.0876634	-0.102047	329.731
-0.108803	0.218239	326.951
0.0629194	0.156712	324.171
0.0501711	0.0147712	321.391
0.11842	0.0397232	321.391
0.113273	0.054162	324.171
0.121973	0.177867	329.731
0.125731	0.171044	329.731
0.185905	0.154351	335.291
0.204566	0.0814022	329.731
0.145917	0.0690685	324.171
0.160511	0.0747451	324.171
0.292977	0.0128933	329.731
0.382773	-0.0696359	329.731
0.209509	-0.260535	324.171
0.202679	-0.113066	321.391
0.257695	-0.315297	329.731
0.12198	-0.0272836	329.731
0.25038	-0.209001	324.171
-0.00919872	-0.0526134	398.004
0.0912623	0.0380513	395.224
0.0947059	0.0481082	398.004
0.140278	0.0287718	395.224
0.0517821	0.169109	396.242
0.0809685	0.143085	400.941
0.233421	0.047198	398.004
0.264582	-0.0539733	398.004
0.237828	-0.1101	400.784
0.279077	-0.0738357	395.224
0.239191	-0.283503	398.004
0.190773	-0.219892	395.224
0.315191	-0.341429	398.004
0.188084	0.00344993	395.224
0.230234	-0.0988854	489.73
0.248046	-0.0310556	489.73
0.166865	0.100959	492.51
0.18238	0.0607586	489.73
0.220721	0.115467	495.29
0.228817	0.111225	495.29
0.187743	0.146255	495.29
0.107938	0.223692	492.51
0.0993429	0.0965752	484.17
-0.251569	0.128671	490.555
0.138735	0.170953	572.51
0.0802861	0.0997092	572.51
0.110208	0.0342996	578.07
-0.00161406	-0.0612782	569.73
-0.118914	-0.20593	569.73
0.222344	-0.0768383	568.728
0.138776	-0.0171481	578.07
0.227503	-0.282637	577.154
0.252557	-0.358811	571.904
0.173713	0.0616912	578.07
0.160017	0.220304	570.453
0.186908	0.182347	649.73
0.0945605	0.164739	649.73
0.074422	0.0628174	655.29
0.120003	0.0649121	649.73
0.239903	0.114025	649.73
0.25535	0.122911	652.51
0.265478	0.0604133	649.73
0.18967	-0.0709796	649.73
0.153291	-0.022665	649.73
0.167309	-0.00539883	655.29
0.127158	0.0224049	649.73
0.0743782	0.0201228	649.73
0.287226	-0.312996	653.807
0.0710069	0.137895	732.509
0.0843818	0.12362	724.169
0.139869	0.0814273	729.729
0.0763123	0.096298	732.509
0.155982	0.0690965	729.729
0.192368	0.123127	729.729
0.191399	0.0322146	724.169
0.195797	0.00982017	724.169
0.143536	0.00502268	721.389
0.130067	0.0156749	724.169
0.160527	-0.0351139	729.73
0.23967	-0.122824	729.73
0.218792	-0.261698	732.564
0.00747383	-0.087876	726.95
0.0702664	0.101936	804.17
0.113285	0.106945	804.17
0.242488	0.134021	804.17
0.273468	0.0986222	809.73
0.205396	0.0183367	809.73
0.16992	0.00832977	812.51
0.204929	0.0529954	812.51
0.286668	-0.0122319	806.95
0.203398	-0.0892028	804.17
0.26853	-0.337704	812.136
0.321025	-0.37368	809.784
0.179538	0.08157	815.29
0.0927137	0.0173456	815.29
0.241123	0.232615	809.73
0.336063	-0.0930274	889.98
0.343211	-0.340046	892.884
0.189743	-0.0381006	886.95
0.195205	0.0466291	881.39
0.189568	0.130009	889.73
0.0704859	0.0756966	881.39
0.175411	0.0103697	892.51
0.0658784	0.118283	881.39
0.152518	-0.0309841	966.95
0.232224	-0.261946	969.009
0.229916	0.0887377	961.39
0.208989	0.122562	961.39
0.178402	0.032117	969.73
0.110475	0.0191252	966.95
0.111202	0.0845755	964.17
0.108348	0.04414	969.73
-0.0634841	-0.10589	972.396
-0.0759713	-0.0402109	1048.28
0.0548798	0.0308781	1044.17
0.135334	0.0494836	1044.17
0.168039	0.00332344	1046.95
0.18377	0.00555125	1044.17
0.0981527	0.125158	1046.95
0.145188	0.229154	1044.17
0.208592	0.172904	1049.73
0.20874	0.138474	1046.95
0.256536	0.0539007	1049.73
-0.0985651	-0.17512	1132.51
-0.128495	-0.207284	1132.93
0.117915	0.0105834	1124.17
0.148949	-0.0185168	1126.95
0.107461	0.105362	1124.17
-0.101812	-0.134817	1204.17
0.049959	-0.0157186	1212.51
0.193593	-0.241548	1215.29
0.230962	-0.269291	1209.73
0.242007	0.0163989	1212.51
0.172141	0.0963469	1209.73
0.130392	0.110427	1201.39
0.113234	0.105603	1209.73
0.0869847	0.198368	1206.95
0.0653486	0.0978263	1209.73
0.0872311	0.0994635	1204.17
0.361483	-0.299935	1288.21
0.142997	0.116507	1284.17
0.035145	0.188802	1286.95
0.0797503	0.155645	1281.39
0.155784	0.0890962	1284.17
0.146903	0.0752453	1289.73
0.276254	0.0820323	1284.75
0.150729	0.0153525	1286.95
0.32514	0.00997652	1365.45
0.227905	-0.0255154	1366.95
0.206842	-0.244417	1361.39
0.194427	0.12344	1361.39
0.214113	0.114965	1361.39
0.261176	0.0781039	1366.95
0.173487	0.00853502	1361.39
0.15182	0.0234751	1361.39
0.196594	0.0569592	1446.4
0.25008	0.075121	1450.55
0.200245	0.123706	1441.84
0.155131	0.122652	1449.11
0.123802	0.114942	1453.18
0.254131	-0.144932	1451.17
0.215325	-0.2375	1452.08
0.164576	0.113612	1529.73
0.20805	0.140045	1526.95
0.28999	0.000177259	1529.73
0.243852	-0.254535	1526.95
0.407379	-0.24229	1532.51
0.166567	0.0711841	1604.17
0.119051	0.0375003	1601.39
0.105058	0.0610302	1606.95
0.12326	-0.0252547	1604.17
0.17856	-0.0705386	1601.39
0.202985	-0.112642	1604.17
0.164634	0.0886701	1689.73
0.240885	-0.0338083	1690.05
0.0689686	0.167688	1686.95
0.184448	0.279565	1696.59
0.145438	0.247783	1695.29
0.13448	-0.0622778	1772.51
0.138552	0.0667488	1762.04
0.158818	0.135336	1768.36
0.254217	0.148863	1846.3
0.154955	-0.042563	1844.17
-0.139541	-0.220255	1843.24

## Sheet: Sheet2
0.254279	-0.0429759	-470.27
0.337778	-0.19204	6.94999
0.28213	-0.266444	398.004
0.309997	-0.08865	489.73
0.376649	-0.152438	577.669
0.27096	-0.247074	577.373
