# Supplementary material for: Spinal premotor interneurons controlling antagonistic muscles are spatially intermingled
Source: eLife. 2022 Dec 13;11:e81976. doi: 10.7554/eLife.81976 (PMC9844990; doi:10.7554/eLife.81976)
Supplement: Figure 12—figure supplement 1—source data 6. [file elife-81976-fig12-figsupp1-data6.xlsx]

## Sheet: Sheet1
0.343436	-0.12517	-2790.18
0.366567	-0.102395	-2786.12
0.395868	-0.205337	-2783.29
0.261062	0.144098	-2784.44
0.0720697	-0.0724127	-2789.16
0.19056	0.167416	-2784.74
0.0478232	0.0926357	-2787.06
-0.219871	-0.24324	-2804.04
-0.189353	-0.0345502	-2797.57
-0.184625	-0.0623298	-2793.32
-0.222815	-0.0669034	-2794.16
-0.258251	-0.261269	-2802.4
-0.28966	-0.015563	-2797.67
0.443947	-0.05787	-2718.38
0.342321	0.0463131	-2718.38
0.230103	0.0203057	-2718.38
0.36847	-0.127824	-2711.88
0.362149	-0.0292003	-2712.41
0.202606	0.0089952	-2711.97
0.113571	-0.0759794	-2718.38
0.0123373	-0.0437962	-2718.38
-0.00332516	-0.0412425	-2718.38
0.180388	0.0654026	-2716.44
0.0601357	0.156229	-2715.51
0.33962	-0.031176	-2638.38
0.312246	0.0221806	-2638.38
0.354121	0.00887479	-2634.68
0.136236	0.0732698	-2638.38
0.106404	-0.0792993	-2638.38
0.208809	-0.161949	-2634.2
0.16711	0.128623	-2638.38
0.157105	0.230918	-2638.38
0.16192	0.248453	-2636.54
-0.158076	-0.217821	-2638.38
-0.261723	-0.257801	-2638.38
-0.222968	-0.286775	-2632.08
0.307025	-0.265676	-2551.71
0.313115	0.00767469	-2558.38
0.348575	-0.16988	-2553.81
0.271947	0.0648927	-2550.69
0.118185	-0.102345	-2555.26
0.201891	0.172866	-2558.38
0.163491	0.162933	-2558.38
0.164026	0.250208	-2551.58
0.0912295	0.0745614	-2552.63
0.221132	0.160994	-2549.29
0.212998	0.175012	-2547.76
0.181228	0.196555	-2548.47
0.166515	0.128748	-2550.02
-0.200059	-0.226957	-2548.99
-0.0126712	0.0539925	-2558.38
-0.198688	-0.103909	-2558.38
-0.172505	-0.141841	-2550.52
-0.229391	-0.232611	-2547.26
0.302011	0.0597916	-2478.38
0.301749	-0.00980692	-2478.38
0.286143	0.069508	-2478.38
0.283799	-0.00833927	-2478.38
0.256735	0.0614585	-2478.38
0.251419	0.0554438	-2478.38
0.247538	0.0429222	-2478.38
0.238208	0.0735781	-2478.38
0.224201	0.019064	-2478.38
0.223887	0.0445682	-2478.38
0.2213	0.0289553	-2478.38
0.264882	0.129929	-2478.38
0.25348	0.181016	-2478.38
0.253652	0.0932707	-2478.38
0.236427	0.0899909	-2478.38
0.231621	0.0864437	-2478.38
0.210209	0.0551789	-2478.38
0.209755	0.109834	-2478.38
-0.0876922	-0.126638	-2471.96
-0.0616022	-0.0308052	-2468.14
-0.215681	-0.363015	-2462.18
-0.242005	-0.150889	-2462.18
0.324632	-0.160317	-2398.38
0.313584	-0.122879	-2398.38
0.304149	-0.180667	-2398.38
0.294697	0.0193387	-2398.38
0.256747	0.0618456	-2398.38
0.253578	0.0212435	-2398.38
0.21909	-0.0285426	-2398.38
0.212009	0.00970076	-2398.38
0.224695	0.207905	-2398.38
0.216433	0.106414	-2398.38
0.197414	0.108861	-2398.38
0.186948	-0.0230901	-2393.09
0.187484	0.1298	-2398.38
0.164103	0.14386	-2398.38
0.138143	0.0826942	-2398.38
0.135414	0.155778	-2398.38
0.131546	0.102106	-2398.38
0.105062	0.181393	-2398.38
0.0971668	0.256097	-2398.38
0.164116	0.111471	-2394.56
0.100442	0.18551	-2396.11
-0.0507917	0.13193	-2389.51
0.327947	-0.161047	-2318.38
0.316872	0.0120003	-2318.38
0.292091	0.00251078	-2318.38
0.291805	-0.175986	-2318.38
0.273613	-0.0365723	-2318.38
0.254995	0.00120455	-2318.38
0.220101	-0.0466176	-2318.38
0.256488	0.0770628	-2318.38
0.225181	0.116753	-2318.38
0.198494	0.083166	-2318.38
0.185374	0.176266	-2318.38
0.176739	0.0922709	-2318.38
0.0977733	0.194096	-2318.38
0.0670876	0.117867	-2318.38
0.1203	0.129044	-2314.97
-0.194138	-0.281324	-2318.38
-0.178561	-0.244531	-2309.02
-0.202444	-0.239544	-2308.43
-0.126415	-0.139456	-2318.38
-0.182578	-0.168456	-2318.38
-0.0985715	-0.0565009	-2311.18
0.468689	-0.101857	-2238.38
0.309999	-0.211332	-2238.38
0.280473	-0.23087	-2238.38
0.307881	0.0867232	-2238.38
0.306642	-0.100304	-2238.38
0.256311	-0.0861351	-2238.38
0.234462	0.0455316	-2238.38
0.210842	0.165191	-2238.38
0.124756	-0.0502622	-2238.38
0.179899	0.0908292	-2238.38
0.152999	0.295279	-2238.38
0.147025	0.290128	-2238.38
0.147213	0.0963678	-2238.38
0.139785	0.113009	-2238.38
0.119539	0.232762	-2238.38
0.158334	0.0919306	-2234.9
-0.173106	0.0812841	-2230.13
-0.249401	0.170126	-2230.98
-0.249969	0.157825	-2230.78
-0.245933	0.190913	-2227.65
-0.269889	0.254341	-2230.14
-0.374618	0.26791	-2228.77
0.23624	-0.0128158	-2153.91
0.319785	-0.132689	-2151.25
0.300614	0.0190958	-2152.31
0.295213	-0.0326885	-2148.23
0.216493	0.0167015	-2150.01
0.260296	0.0417957	-2151.18
0.238816	0.228595	-2150.57
0.220545	0.158044	-2153.01
0.217556	0.0462491	-2152.29
0.197295	0.160031	-2151.13
0.308891	0.127289	-2148.05
0.211789	0.0725259	-2149.02
0.165025	0.0148533	-2150.06
0.150735	0.00948237	-2149.46
0.125274	0.0242366	-2147.38
0.183473	0.0982542	-2152.53
0.169835	0.145946	-2151.31
0.0786964	0.238281	-2151.11
0.15364	0.0911184	-2150.2
-0.199025	-0.163381	-2148.21
-0.162431	0.331432	-2147.22
-0.23119	-0.171765	-2147.6
0.40631	0.214514	-2146.67
0.234213	-0.213097	-2144.93
0.30831	0.203391	-2145.16
0.272901	0.0889169	-2145.76
0.134776	0.0645025	-2142.18
0.0709476	0.21938	-2142.18
0.13949	0.283313	-2142.18
-0.183273	-0.179679	-2146.04
-0.178428	0.321737	-2145.11
-0.182751	0.337113	-2146.62
-0.18234	0.299428	-2142.18
0.375386	-0.185007	-2073.07
0.25209	-0.221896	-2078.38
0.339646	-0.220177	-2074.9
0.318705	0.0409748	-2078.38
0.317032	-0.0538208	-2078.38
0.280045	0.0253822	-2078.38
0.267494	0.00885962	-2078.38
0.233783	0.060011	-2078.38
0.232777	0.068605	-2078.38
0.226343	0.0365911	-2078.38
0.216597	0.0704709	-2078.38
0.208961	0.0613353	-2078.38
0.207962	0.00301419	-2078.38
0.196399	0.0234221	-2078.38
0.297235	0.0523295	-2074.17
0.222384	-0.0286241	-2075.09
0.270947	-0.0560745	-2072.07
0.184143	0.0395142	-2071.91
0.303153	-0.192491	-2068.52
0.229777	0.00262291	-2070.27
0.343515	0.153884	-2078.38
0.335464	0.100776	-2078.38
0.307198	0.139264	-2078.38
0.277359	0.120509	-2078.38
0.263046	0.117575	-2078.38
0.24074	0.0933267	-2078.38
0.213619	0.148628	-2078.38
0.186013	0.238093	-2078.38
0.179966	0.147197	-2078.38
0.323523	0.0959404	-2075.11
0.210633	0.180294	-2076.06
0.329854	0.148388	-2071.76
0.174187	0.0366296	-2076.24
0.175717	-0.038384	-2069
0.173521	0.158677	-2078.38
0.167096	0.173815	-2078.38
0.167918	0.104583	-2078.38
0.144004	0.264876	-2078.38
0.136788	0.173146	-2071.03
0.121552	0.144152	-2070.32
0.051673	0.192292	-2073.52
-0.160675	-0.240266	-2078.38
-0.12447	-0.233343	-2069.34
-0.160496	-0.257612	-2068.24
-0.0864436	-0.175952	-2071.36
-0.154199	0.267539	-2075.23
-0.164981	0.259631	-2074.13
-0.160056	0.274643	-2070.83
-0.120233	0.337406	-2078.38
-0.134763	0.32725	-2075.5
-0.10854	0.0417575	-2065.86
0.253199	-0.195809	-1996.26
0.208191	0.0571295	-1998.38
0.328927	0.0812655	-1994.8
0.193888	0.0581002	-1995.47
0.178845	0.0108619	-1993.17
0.208959	0.132236	-1992.96
0.202591	0.152097	-1992.46
0.193787	0.142907	-1990.5
0.145106	0.0680685	-1998.38
0.0590646	0.0676263	-1998.38
0.0878826	0.0472635	-1996.04
0.15851	0.107468	-1998.38
0.155852	0.236424	-1998.38
0.156415	0.150742	-1998.38
0.147346	0.195037	-1998.38
0.127697	0.1835	-1998.38
0.0521857	0.190296	-1998.38
0.137983	0.121231	-1994.6
0.137624	0.10927	-1993.84
0.103834	0.230954	-1994.73
0.0451436	0.186438	-1995.61
0.0241774	0.114688	-1993.77
0.102538	0.185828	-1992.48
0.0851727	0.200602	-1988.45
-0.12414	-0.189422	-1998.38
-0.193794	-0.172523	-1992.18
-0.0590972	-0.178715	-1989.92
-0.235874	0.0389182	-1998.38
-0.239472	0.052128	-1998.38
-0.253371	0.0548968	-1998.38
-0.260695	0.0578991	-1993.55
0.301328	0.0478069	-1918.38
0.259832	-0.165083	-1918.38
0.236882	-0.0728371	-1918.38
0.204281	0.0683541	-1918.38
0.194708	0.0044736	-1918.38
0.331207	0.074242	-1914.59
0.304507	-0.0599944	-1913.14
0.258758	0.0363732	-1910.4
0.236782	-0.0378317	-1911.63
0.223123	0.0589747	-1910.26
0.26606	0.0933841	-1918.38
0.203959	0.120854	-1918.38
0.201586	0.081324	-1918.38
0.178574	0.140077	-1918.38
0.176376	0.23914	-1914.85
0.169489	0.0194916	-1918.38
0.0787797	-0.137273	-1918.38
0.146113	-0.028242	-1912.93
0.165138	0.126712	-1918.38
0.157139	0.134095	-1918.38
0.145561	0.0983091	-1918.38
0.119341	0.210712	-1918.38
0.107975	0.190715	-1918.38
0.0970882	0.182765	-1918.38
-0.00439748	0.185153	-1918.38
0.0890023	0.205114	-1910.53
-0.129028	-0.199147	-1918.38
-0.148057	-0.0371424	-1910.66
-0.0601934	-0.117916	-1908.69
-0.215206	-0.308239	-1918.38
0.369127	0.204318	-1831.53
0.272411	-0.0444114	-1838.38
0.25724	0.0031203	-1838.38
0.253089	0.0230616	-1838.38
0.241598	0.0231449	-1838.38
0.219992	0.0196114	-1838.38
0.217918	-0.134246	-1838.38
0.215024	-0.00825944	-1838.38
0.213811	-0.0985938	-1838.38
0.212276	0.0111508	-1838.38
0.204534	0.0272082	-1838.38
0.203751	-0.000357994	-1838.38
0.179879	0.0627472	-1838.38
0.177623	0.0217891	-1838.38
0.166337	0.0735649	-1838.38
0.161216	0.0690608	-1838.38
0.314976	0.0797738	-1834.4
0.179776	0.0840665	-1836.51
0.322817	0.120352	-1838.38
0.304635	0.12341	-1838.38
0.299171	0.219146	-1838.38
0.24854	0.254057	-1838.38
0.238785	0.191884	-1838.38
0.239035	0.200542	-1838.38
0.196184	0.111223	-1838.38
0.198535	0.268303	-1833.17
0.154339	0.0622165	-1838.38
0.154374	0.0762581	-1838.38
0.152132	0.0460104	-1838.38
0.14796	0.0296034	-1838.38
0.144462	0.0725833	-1838.38
0.0721694	0.000506496	-1830.93
0.142039	0.10374	-1838.38
0.109299	0.104836	-1838.38
0.0711608	0.202487	-1838.38
0.136151	0.176285	-1832.26
0.124556	0.165022	-1831.69
-0.10779	0.336018	-1835.93
0.304687	-0.0608078	-1758.38
0.297458	-0.00207572	-1758.38
0.292718	-0.0943435	-1758.38
0.265051	-0.00292293	-1758.38
0.259374	0.000915968	-1758.38
0.253093	-0.00371126	-1758.38
0.363036	0.0998742	-1758.38
0.306301	0.118918	-1758.38
0.296667	0.13326	-1758.38
0.283825	0.161361	-1758.38
0.273282	0.162624	-1758.38
0.259549	0.185133	-1758.38
0.260158	0.149491	-1758.38
0.253186	0.104227	-1758.38
0.250399	0.159803	-1758.38
0.242133	0.0950999	-1758.38
0.236972	0.203503	-1758.38
0.234703	0.164418	-1758.38
0.232198	0.09666	-1758.38
0.223969	0.0167717	-1758.38
0.206743	0.0714628	-1758.38
0.123752	0.0680958	-1758.38
0.211225	0.0514942	-1754.73
0.212432	0.221313	-1758.38
0.208616	0.0993039	-1758.38
0.160249	0.175359	-1758.38
0.162439	0.106178	-1758.38
0.159627	0.087345	-1758.38
0.149436	0.124941	-1758.38
0.14976	0.0938778	-1758.38
0.149355	0.0837097	-1758.38
0.148197	0.113433	-1758.38
0.132223	0.188119	-1758.38
0.117219	0.273428	-1758.38
0.11405	0.169335	-1758.38
0.110865	0.236265	-1758.38
0.0994966	0.136	-1758.38
0.0579244	0.290632	-1758.38
0.172123	0.191029	-1756.12
-0.10031	-0.254844	-1758.38
-0.0607807	-0.0956562	-1758.38
-0.0682136	0.0225425	-1758.38
-0.0621856	-0.169292	-1758.38
-0.105881	-0.0184727	-1758.38
-0.0881181	0.33896	-1754.5
-0.14476	-0.310846	-1758.38
-0.15321	-0.179604	-1758.38
0.230069	-0.329218	-1678.38
0.281213	-0.0201033	-1678.38
0.273252	-0.0730683	-1678.38
0.234599	-0.0223828	-1678.38
0.276794	0.0881155	-1678.38
0.269922	0.283705	-1678.38
0.244687	0.116004	-1678.38
0.237845	0.136289	-1678.38
0.226865	0.184388	-1678.38
0.222556	0.114077	-1678.38
0.209933	0.181576	-1678.38
0.202177	0.151551	-1678.38
0.168039	0.0636463	-1678.38
0.147263	0.0527444	-1678.38
0.14367	-0.00331507	-1678.38
0.143381	0.0297727	-1678.38
0.117001	0.0477283	-1678.38
0.0718797	-0.0158466	-1678.38
0.0604667	0.0381606	-1678.38
0.147721	0.0960361	-1678.38
0.127075	0.112971	-1678.38
0.122555	0.123474	-1678.38
0.120794	0.189899	-1678.38
0.0988963	0.252357	-1678.38
-0.0996039	-0.104501	-1678.38
0.350511	0.22862	-1598.38
0.220864	-0.287468	-1598.38
0.295904	0.0931318	-1598.38
0.246309	0.00448164	-1598.38
0.246078	-0.102826	-1598.38
0.237765	0.101738	-1598.38
0.206114	0.0380175	-1598.38
0.193403	0.0594235	-1598.38
0.182707	0.113668	-1598.38
0.177236	0.0675691	-1598.38
0.332732	0.221303	-1598.38
0.313335	0.184066	-1598.38
0.309921	0.241099	-1598.38
0.274394	0.160705	-1598.38
0.247072	0.132728	-1598.38
0.208178	0.153917	-1598.38
0.200845	0.214131	-1598.38
0.197271	0.202981	-1598.38
0.186104	0.307135	-1598.38
0.178213	0.317893	-1598.38
0.170082	0.042702	-1598.38
0.164384	0.0022425	-1598.38
0.160286	0.0849939	-1598.38
0.128837	0.0807678	-1598.38
0.112922	0.09752	-1598.38
0.112389	0.0488256	-1598.38
0.100646	0.107812	-1598.38
0.077483	0.0581767	-1598.38
0.0333116	0.0112385	-1598.38
0.167339	0.195901	-1598.38
0.136313	0.172704	-1598.38
0.0979826	0.192431	-1598.38
0.0897543	0.130655	-1598.38
0.0829408	0.214889	-1598.38
0.0825818	0.141022	-1598.38
0.150942	0.349072	-1598.38
0.120992	0.351373	-1598.38
-0.11763	-0.183532	-1598.38
-0.0913766	-0.142702	-1598.38
-0.140533	-0.111282	-1598.38
-0.140804	-0.145081	-1598.38
0.380361	0.0419047	-1518.38
0.360032	0.0201293	-1518.38
0.269956	-0.341471	-1518.38
0.314263	0.0793039	-1518.38
0.271684	0.0750685	-1518.38
0.263943	-0.014616	-1518.38
0.263537	-0.0234712	-1518.38
0.258613	0.035796	-1518.38
0.248235	-0.194043	-1518.38
0.246381	-0.0869311	-1518.38
0.199175	-0.0412022	-1518.38
0.187472	0.0749347	-1518.38
0.334153	0.194544	-1518.38
0.299638	0.182132	-1518.38
0.260448	0.139167	-1518.38
0.257531	0.157406	-1518.38
0.231341	0.151631	-1518.38
0.230909	0.126288	-1518.38
0.226932	0.136374	-1518.38
0.21417	0.178621	-1518.38
0.207057	0.122805	-1518.38
0.201291	0.22401	-1518.38
0.189955	0.202536	-1518.38
0.179315	0.173085	-1518.38
0.170495	-0.0189612	-1518.38
0.141656	0.0588401	-1518.38
0.170453	0.265023	-1518.38
0.165952	0.257854	-1518.38
0.155592	0.2834	-1518.38
0.148488	0.157416	-1518.38
0.0975898	0.209904	-1518.38
0.090932	0.156128	-1518.38
0.0854405	0.130337	-1518.38
0.0851448	0.209948	-1518.38
0.0748149	0.241022	-1518.38
-0.0908167	-0.229884	-1518.38
-0.0487854	-0.155951	-1518.38
-0.0649527	-0.144749	-1518.38
-0.0901445	-0.163896	-1518.38
0.251612	-0.275709	-1428.96
0.245128	0.0093081	-1434.41
0.201226	0.0895946	-1435.31
0.190891	0.0919422	-1435.68
0.19087	0.075259	-1434.97
0.245512	0.0717109	-1433.31
0.191998	-0.0278495	-1433.08
0.253206	0.107383	-1428.36
0.222812	-0.0980586	-1430.15
0.191477	0.00405438	-1429.38
0.182291	0.0812719	-1429.96
0.195791	0.145516	-1438.38
0.225466	0.151663	-1436.33
0.206545	0.219087	-1436.67
0.300225	0.226508	-1431.93
0.231171	0.158506	-1431.7
0.215484	0.1428	-1432.84
0.264084	0.174777	-1429.93
0.259518	0.150148	-1429.29
0.237645	0.177118	-1429.85
0.172501	0.0746838	-1433.99
0.171494	0.09155	-1434.37
0.162148	0.101329	-1434.08
0.151842	0.130263	-1435.72
0.146617	0.0915932	-1436.72
0.142539	0.111471	-1435.48
0.132286	0.109407	-1434.49
0.130805	0.0893458	-1433.74
0.129114	0.100983	-1434.46
0.105624	0.0448191	-1435.05
0.0375769	0.0533608	-1434.76
0.151325	0.0178566	-1433.19
0.135215	-0.00716738	-1431.42
0.106461	0.103132	-1432.05
0.0796322	0.0382018	-1432.66
0.170669	0.125301	-1429.96
0.164699	0.269453	-1438.38
0.164863	0.219641	-1438.38
0.163916	0.260856	-1438.38
0.121451	0.251713	-1438.38
0.0875061	0.214004	-1438.38
0.146687	0.182567	-1434.26
0.12696	0.258066	-1435.62
0.170317	0.192981	-1430.74
0.15848	0.180397	-1432.2
-0.129601	-0.173558	-1435.73
-0.000992297	-0.117603	-1428.99
-0.0314751	-0.0216378	-1434.43
-0.0353407	-0.0300259	-1433.83
-0.131159	0.0187009	-1432.15
-0.153967	-0.0673905	-1432.66
0.210181	-0.270743	-1358.38
0.298526	0.0835053	-1358.38
0.287719	-0.0381322	-1358.38
0.28316	-0.0561176	-1358.38
0.268211	0.0802642	-1358.38
0.262826	-0.0336512	-1358.38
0.259588	0.0872824	-1358.38
0.241528	-0.0799584	-1358.38
0.207556	0.0968498	-1358.38
0.207782	0.0592468	-1358.38
0.2013	0.0840754	-1358.38
0.181822	0.0799443	-1358.38
0.155095	0.0157837	-1358.38
0.250678	-0.0413769	-1356.13
0.221161	0.0506493	-1354.95
0.179582	0.049269	-1356.22
0.155945	0.0560027	-1355.19
0.224678	0.0549299	-1353.07
0.197507	-0.135223	-1351.07
0.189009	-0.0239397	-1352.27
0.179427	0.00136506	-1351.25
0.217883	0.000152504	-1348.6
0.275441	0.151928	-1358.38
0.243485	0.173212	-1358.38
0.218496	0.108073	-1358.38
0.212935	0.208916	-1358.38
0.188963	0.185844	-1358.38
0.174808	0.138583	-1358.38
0.172981	0.185084	-1358.38
0.162261	0.161307	-1358.38
0.154105	0.134415	-1358.38
0.226978	0.190208	-1352.96
0.18326	0.112222	-1353.11
0.160686	0.192299	-1352.6
0.158945	0.28198	-1352.44
0.146351	0.0142574	-1358.38
0.135862	0.00840086	-1358.38
0.129639	0.0894664	-1358.38
0.124557	0.0507629	-1358.38
0.0750713	0.0979195	-1358.38
0.114336	0.019432	-1352.06
0.14642	0.0793504	-1348.58
0.139887	0.0202856	-1347.8
0.149834	0.171563	-1358.38
0.135404	0.15007	-1358.38
0.119734	0.275239	-1358.38
0.111704	0.262497	-1358.38
0.111209	0.276336	-1358.38
0.101106	0.250912	-1358.38
0.0991483	0.241017	-1358.38
0.0843661	0.118349	-1358.38
0.0826512	0.134269	-1358.38
0.134709	0.251597	-1351.61
-0.0885898	-0.000311275	-1353.38
-0.14751	0.267596	-1353.03
-0.157373	-0.187333	-1344.6
0.238461	-0.193171	-1275.87
0.236836	-0.202481	-1274.86
0.227467	-0.151532	-1270.63
0.222045	-0.175855	-1271.2
0.241673	0.0806488	-1278.38
0.218346	0.101395	-1278.38
0.212624	0.102838	-1278.38
0.191213	0.0601428	-1272.87
0.266077	0.043033	-1268.66
0.213678	0.0802502	-1268.69
0.2627	0.154503	-1278.38
0.239483	0.189998	-1278.38
0.225553	0.141913	-1278.38
0.194706	0.195056	-1278.38
0.184552	0.308152	-1278.38
0.181043	0.220696	-1278.38
0.225225	0.179335	-1272.37
0.187918	0.209391	-1273.04
0.18667	0.181362	-1271.95
0.274736	0.251793	-1268.23
0.200637	0.181171	-1269
0.183099	0.0198477	-1278.38
0.173781	0.0800204	-1278.38
0.167048	0.0802788	-1278.38
0.14622	0.0719763	-1278.38
0.143709	0.036026	-1278.38
0.141012	0.0730469	-1274.76
0.110926	0.0719497	-1275.44
0.173576	0.102448	-1268.92
0.15197	0.0745863	-1269.75
0.087318	0.0984594	-1268.37
0.176563	0.257941	-1278.38
0.15176	0.155773	-1278.38
0.137947	0.231965	-1278.38
0.0879831	0.248795	-1278.38
0.0920845	0.179646	-1271.08
0.121634	0.228798	-1269.08
-0.0665629	-0.109273	-1278.38
-0.0809004	-0.110869	-1278.38
-0.141563	0.0760269	-1274.37
-0.0904936	0.228073	-1278.38
-0.168715	-0.243506	-1278.38
-0.17911	-0.2365	-1275.84
-0.208337	0.202552	-1278.38
-0.220673	0.206342	-1272.64
0.336854	-0.0732563	-1265.1
0.260124	-0.0817052	-1266.77
0.0685437	0.0790699	-1262.18
0.334127	0.0922044	-1189.1
0.320965	0.205842	-1190.44
0.194636	-0.14136	-1191.44
0.270129	0.105159	-1198.38
0.196354	0.113011	-1198.38
0.175487	0.0509772	-1198.38
0.226866	0.0260253	-1194.76
0.237391	0.0929187	-1192.36
0.214597	0.0685232	-1192.82
0.280572	0.174924	-1198.38
0.250538	0.279848	-1198.38
0.25422	0.176274	-1198.38
0.247278	0.207366	-1198.38
0.239944	0.329911	-1198.38
0.226546	0.334651	-1198.38
0.209692	0.174739	-1198.38
0.204377	0.154408	-1198.38
0.185177	0.193374	-1198.38
0.173752	0.19335	-1198.38
0.164944	0.209525	-1198.38
0.161386	0.15647	-1194.34
0.167421	0.142556	-1190.3
0.146569	0.333601	-1192.25
0.148147	0.045484	-1198.38
0.142784	0.114655	-1198.38
0.134032	0.0560036	-1198.38
0.0260937	0.0573298	-1195.76
0.000691451	-0.0585367	-1190.53
-0.132025	-0.237091	-1198.38
-0.141204	-0.168012	-1193.34
-0.0188952	0.0598462	-1198.38
-0.085171	-0.14194	-1198.38
-0.100154	-0.142411	-1198.38
-0.112299	-0.137103	-1198.38
-0.129592	-0.0494162	-1198.38
-0.189902	-0.111785	-1196.32
0.368521	-0.107115	-1111.18
0.206152	-0.324901	-1113.99
0.264252	-0.158733	-1113.42
0.278656	-0.160112	-1108.9
0.226049	-0.0121171	-1116.29
0.225568	0.0732187	-1115.53
0.21117	-0.0546199	-1115.89
0.207618	0.071071	-1114.88
0.260665	-0.0361444	-1110.98
0.171603	0.0300062	-1111.69
0.255493	0.00441124	-1109.55
0.196819	-0.00864049	-1109.89
0.227911	0.261246	-1118.38
0.190354	0.149876	-1118.38
0.327761	0.132001	-1116.34
0.265099	0.213495	-1116.56
0.23026	0.173877	-1116.03
0.223687	0.14566	-1114.36
0.213655	0.320512	-1115.35
0.184941	0.13378	-1116.28
0.279093	0.333892	-1113.46
0.224639	0.192049	-1111.47
0.201717	0.238337	-1111.85
0.280304	0.152347	-1109.69
0.238758	0.226332	-1109.91
0.146259	0.0373046	-1114.61
0.0907662	0.0998468	-1116.22
0.153074	0.26884	-1115.5
0.150104	0.258755	-1116.33
0.135706	0.224218	-1115.29
0.126952	0.11362	-1113.7
0.114714	0.11642	-1116.73
0.0934765	0.122203	-1115.16
0.0855755	0.242725	-1113.21
0.0655843	0.177715	-1112.43
-0.185328	-0.195605	-1118.38
-0.106767	-0.222093	-1110.32
-0.0351738	-0.131879	-1113.37
-0.193816	-0.188081	-1115.19
0.349718	-0.623992	-1034.35
0.352301	-0.137475	-1038.38
0.286611	-0.29885	-1038.38
0.300721	0.0885136	-1038.38
0.2713	0.0627743	-1038.38
0.26468	-0.0830162	-1038.38
0.257441	-0.0585307	-1038.38
0.224098	0.0102034	-1038.38
0.221516	0.0394193	-1038.38
0.212583	0.0584534	-1038.38
0.197063	0.0645671	-1038.38
0.260287	-0.0438556	-1036.52
0.194347	0.0136106	-1031.68
0.311039	0.166003	-1038.38
0.262465	0.13929	-1038.38
0.261208	0.190837	-1038.38
0.259401	0.103896	-1038.38
0.256873	0.163975	-1038.38
0.241884	0.292124	-1038.38
0.229518	0.157559	-1038.38
0.221666	0.0976446	-1038.38
0.199277	0.131476	-1038.38
0.171187	0.264244	-1038.38
0.228694	0.113003	-1032.4
0.20263	0.26134	-1030.48
0.19281	0.266443	-1030.62
0.170367	0.320247	-1030.15
0.164008	0.0151028	-1038.38
0.159394	-0.0223605	-1038.38
0.148736	-0.0116092	-1038.38
0.126028	0.054882	-1038.38
0.165821	0.0489574	-1034.96
0.149892	0.0588324	-1036.12
0.0659049	0.0259506	-1030.64
0.0981239	0.0963785	-1038.38
0.115966	0.244681	-1032.27
-0.0831538	-0.175309	-1038.38
-0.0858799	-0.15283	-1038.38
-0.0283833	-0.112572	-1034.68
-0.124097	-0.0533919	-1033.11
-0.0753023	0.199937	-1038.38
-0.0935627	0.19627	-1038.38
-0.102844	0.190366	-1038.38
-0.108808	0.1967	-1038.38
0.303161	-0.116121	-958.38
0.268558	-0.186162	-958.38
0.213531	0.000237172	-958.38
0.208936	0.0537998	-958.38
0.143682	0.00902712	-958.38
0.277787	-0.00341768	-953.163
0.220472	-0.0304071	-953.362
0.264483	0.14736	-958.38
0.216616	0.230672	-958.38
0.215493	0.113061	-958.38
0.209431	0.130706	-958.38
0.166058	0.215524	-958.38
0.15237	0.0615772	-958.38
0.147467	0.258148	-958.38
0.269023	0.199691	-953.861
0.223769	0.175069	-953.635
0.196569	0.160249	-954.635
0.024318	-0.086825	-958.38
0.0225609	0.0344725	-958.38
0.00797255	-0.0792962	-954.329
0.127887	0.184164	-958.38
0.12219	0.13742	-958.38
0.110423	0.239108	-958.38
0.103225	0.161543	-958.38
0.0750417	0.242765	-958.38
0.123319	0.211768	-954.792
0.074073	0.259129	-952.579
0.0689387	0.148283	-953.062
-0.091498	-0.205988	-952.886
-0.0465114	-0.102472	-958.38
-0.0467731	-0.111548	-958.38
-0.0946889	-0.166876	-955.285
-0.163582	0.0423796	-958.38
-0.274178	0.236515	-958.38
0.319848	0.238588	-878.38
0.211881	-0.291042	-878.38
0.290363	0.0388671	-878.38
0.268972	-0.0947073	-878.38
0.264202	-0.0392761	-878.38
0.250228	-0.0651558	-878.38
0.223759	0.0849287	-878.38
0.177645	0.0832775	-878.38
0.173853	0.0722273	-878.38
0.169628	0.0590665	-878.38
0.155019	0.0486353	-878.38
0.159429	0.0187256	-874.983
0.280897	0.123251	-872.597
0.273171	-0.00220031	-872.702
0.266984	-0.0685142	-872.704
0.2042	0.116982	-872.584
0.211626	-0.11477	-872.983
0.200244	0.0218383	-872.774
0.269251	0.314785	-878.38
0.257103	0.23195	-878.38
0.242186	0.238722	-878.38
0.23786	0.167089	-878.38
0.218517	0.234482	-878.38
0.217114	0.158723	-878.38
0.19888	0.217378	-878.38
0.185962	0.174392	-878.38
0.181099	0.150289	-878.38
0.233777	0.265947	-876.563
0.21029	0.153288	-873.869
0.256082	0.200504	-871.306
0.223189	0.207669	-871.56
0.224697	0.126681	-872.55
0.160541	0.266905	-872.73
0.131813	0.0333981	-878.38
0.121271	0.0873509	-878.38
0.0907812	0.0818765	-878.38
0.0892746	0.0490752	-878.38
0.0769921	0.0684524	-878.38
0.130338	0.223322	-878.38
0.111738	0.258852	-878.38
0.111139	0.127401	-878.38
0.134439	0.201088	-872.48
-0.11582	-0.242276	-875.323
-0.0834432	-0.115144	-878.38
-0.102255	-0.0640907	-870.881
-0.0288711	0.0744798	-878.38
-0.0611074	0.115399	-878.38
-0.281692	0.234714	-878.38
0.303375	0.0621452	-791.714
0.33193	0.218623	-794.579
0.232662	0.0730797	-798.38
0.226967	0.11944	-798.38
0.215394	0.0591656	-798.38
0.21127	0.0992014	-798.38
0.202015	0.0132667	-798.38
0.183878	0.0558501	-798.38
0.227312	0.0113793	-795.429
0.162556	0.0091697	-793.648
0.140704	-0.0847271	-793.633
0.132096	-0.0796432	-795.836
0.228682	0.100356	-792.477
0.21743	0.0348772	-791.309
0.186988	0.08842	-793.382
0.173102	0.0143946	-791.414
0.15469	0.0747303	-793.312
0.258547	0.101719	-789.508
0.249713	-0.0551866	-789.705
0.241874	0.127593	-788.473
0.216132	0.120874	-789.226
0.211987	-0.0484506	-789.142
0.214411	0.132561	-798.38
0.226254	0.132283	-793.908
0.261939	0.157065	-792.879
0.227709	0.149615	-789.34
0.0186968	-0.0620078	-798.38
0.0749443	0.0435338	-795.196
0.123244	0.0679721	-791.147
0.0463643	-0.0511598	-787.837
0.00696826	-0.0857028	-789.537
0.0741891	0.216499	-798.38
0.0582578	0.18763	-798.38
0.0608566	0.176883	-794.437
-0.0768265	-0.170381	-790.285
-0.0751727	-0.107899	-790.857
0.243953	-0.204653	-784.568
0.278867	-0.017004	-784.533
0.0858076	0.0433538	-784.832
0.113967	0.26408	-786.796
-0.0629261	-0.131282	-786.701
0.304163	0.00807328	-718.38
0.213926	0.052728	-718.38
0.212534	0.0714575	-718.38
0.217731	-0.0461233	-718.38
0.198787	0.0493273	-718.38
0.179053	0.0415326	-718.38
0.259442	-0.0867574	-712.647
0.199182	0.0551931	-713.006
0.313099	0.111888	-718.38
0.278369	0.154084	-718.38
0.254251	0.212733	-718.38
0.228513	0.286771	-718.38
0.231308	0.118341	-718.38
0.219135	0.109655	-718.38
0.214997	0.126881	-718.38
0.193309	0.218872	-718.38
0.189928	0.174069	-718.38
0.186277	0.0975493	-718.38
0.180288	0.166718	-718.38
0.231817	0.163068	-714.153
0.279608	0.188661	-711.484
0.228067	0.206051	-712.724
0.0982898	-0.192695	-718.38
0.123187	0.0852676	-718.38
0.101779	0.057414	-718.38
0.0663245	0.00582535	-718.38
0.0611251	0.0428415	-718.38
0.17502	-0.0217689	-715.042
0.165521	0.0803368	-714.598
0.114314	-0.0802175	-713.968
0.104378	0.0318666	-715.792
0.172821	0.0439611	-712.428
0.0471664	-0.00133568	-713.139
0.168802	0.157071	-718.38
0.151304	0.111877	-718.38
0.137552	0.265379	-718.38
0.134481	0.242919	-718.38
0.120098	0.295405	-718.38
0.112424	0.289376	-718.38
0.101268	0.115921	-718.38
0.0761011	0.107811	-711.457
0.0580881	0.213037	-712.142
-0.00747115	-0.0681738	-718.38
-0.14641	-0.121	-718.38
-0.0391004	-0.0924657	-712.632
-0.192382	-0.282878	-712.802
-0.307368	-0.00885035	-718.38
0.283849	0.00505166	-638.38
0.267595	-0.136663	-638.38
0.255557	-0.00373361	-638.38
0.25382	-0.0774512	-638.38
0.218824	0.0151656	-638.38
0.20875	-0.171697	-638.38
0.191302	0.0434431	-638.38
0.180011	0.0352176	-638.38
0.158636	-0.0166779	-638.38
0.227564	-0.00926764	-633.697
0.291611	0.086489	-638.38
0.249959	0.298217	-638.38
0.25028	0.241362	-638.38
0.243365	0.119717	-638.38
0.234164	0.206029	-638.38
0.229046	0.220154	-638.38
0.202598	0.149534	-638.38
0.191676	0.104156	-638.38
0.186218	0.152512	-638.38
0.18344	0.265936	-638.38
0.180857	0.293726	-638.38
0.180042	0.131062	-638.38
0.172597	0.0959136	-638.38
0.164535	0.144749	-638.38
0.141858	0.162732	-638.38
0.255941	0.146267	-636.403
0.248507	0.106877	-633.86
0.199243	0.0848146	-635.868
0.166391	0.123593	-634.835
0.160418	0.165584	-636.36
0.290902	0.164425	-631.632
0.19897	0.285086	-631.781
0.190988	0.320847	-634.892
0.133968	0.0477825	-638.38
0.130849	-0.189883	-638.38
0.127341	-0.0268161	-638.38
0.0888491	0.0174232	-638.38
0.0471826	0.00319907	-638.38
0.0419302	-0.00672108	-638.38
0.0399808	0.0226213	-638.38
0.0264523	0.0224522	-638.38
0.0171205	-0.0156035	-638.38
0.00333635	-0.0836509	-638.38
0.127912	0.125182	-638.38
0.103822	0.146688	-638.38
0.0977399	0.112911	-638.38
0.0759013	0.199922	-638.38
0.0728115	0.0533163	-638.38
0.07105	0.0989205	-638.38
0.0252263	0.0557855	-638.38
0.115853	0.214591	-634.877
0.0627965	0.135347	-633.941
-0.112415	-0.246553	-638.38
-0.164527	-0.273564	-638.38
-0.174306	-0.262313	-638.38
-0.0844407	-0.0518638	-638.38
-0.0896481	-0.159006	-638.38
-0.112034	-0.152968	-638.38
-0.130746	-0.155055	-638.38
-0.10309	-0.0517222	-636.16
0.325013	0.170281	-558.38
0.302508	-0.356975	-558.38
0.290443	-0.213895	-558.38
0.28961	-0.243014	-558.38
0.283689	-0.262797	-558.38
0.213049	-0.27206	-558.38
0.284463	0.0546404	-558.38
0.212386	0.0214572	-558.38
0.191828	0.0408449	-558.38
0.192337	0.00424735	-558.38
0.168386	-0.0381368	-558.38
0.149171	0.0227912	-558.38
0.135587	0.045176	-558.38
0.134217	0.0250474	-558.38
0.246664	0.0284933	-554.081
0.221756	0.0139801	-556.744
0.185843	0.00732096	-553.372
0.293231	0.28226	-558.38
0.285995	0.124895	-558.38
0.277565	0.213111	-558.38
0.267868	0.127009	-558.38
0.266772	0.0883832	-558.38
0.259013	0.276188	-558.38
0.250848	0.197931	-558.38
0.219513	0.12793	-558.38
0.214579	0.0995264	-558.38
0.204588	0.244026	-558.38
0.206885	0.0801245	-558.38
0.196621	0.231378	-558.38
0.198818	0.165996	-558.38
0.197238	0.183431	-558.38
0.173742	0.0994981	-558.38
0.166266	0.253914	-558.38
0.152643	0.278957	-558.38
0.146021	0.107145	-558.38
0.145082	0.122948	-558.38
0.301838	0.156517	-554.718
0.247237	0.120035	-552.121
0.201088	0.126362	-552.388
0.171679	0.209768	-552.123
0.222644	0.298827	-549.557
0.168356	0.33582	-556.207
0.13261	-0.0289449	-558.38
0.126758	0.00318864	-558.38
0.11869	0.0208476	-558.38
0.118267	-0.011077	-558.38
0.109911	-0.0102183	-558.38
0.0714187	0.0241773	-558.38
0.0580953	0.00296687	-558.38
0.049913	0.0270554	-558.38
0.0185558	-0.133855	-555.754
0.0324865	-0.024064	-553.257
0.015864	-0.0773	-550.342
0.089302	0.175735	-558.38
0.0876961	0.144312	-558.38
0.0776617	0.0999519	-558.38
0.0144773	0.0707685	-558.38
0.0906249	0.28598	-551.599
0.0663454	0.257459	-550.749
-0.139959	-0.230925	-558.38
-0.0925661	-0.148888	-558.38
-0.0461734	-0.133752	-551.816
-0.158706	-0.224612	-552.716
-0.0629876	0.0621551	-558.38
-0.151384	0.0410944	-554.704
-0.165523	0.1673	-551.878
0.341272	-0.240001	-467.194
0.318761	-0.00341095	-469.42
0.320149	0.170361	-470.708
0.311295	0.149722	-468.91
0.248851	-0.292678	-478.38
0.226983	-0.240301	-478.38
0.265731	-0.241642	-471.524
0.211856	-0.275539	-467.974
0.25448	0.0223315	-478.38
0.117764	0.0188173	-478.38
0.122789	0.0232338	-474.545
0.281034	-0.177863	-471.257
0.277565	-0.161961	-471.3
0.270245	-0.00327917	-471.424
0.200333	0.0226414	-469.089
0.143561	-0.105902	-467.478
0.245082	0.101199	-478.38
0.236157	0.182727	-478.38
0.171332	0.116235	-478.38
0.128172	0.10221	-478.38
0.11561	0.102324	-478.38
0.264454	0.0661403	-473.895
0.234628	0.225136	-476.139
0.23502	0.100536	-475.771
0.214245	0.0484802	-474.582
0.202338	0.102303	-474.068
0.190865	0.191535	-475.583
0.187399	0.202659	-475.012
0.187326	0.142408	-475.72
0.153886	0.118219	-474.112
0.1475	0.148626	-474.115
0.140356	0.0872044	-474.266
0.116437	0.117133	-474.561
0.114854	0.124088	-474.471
0.115923	0.0671257	-473.652
0.190408	0.0533577	-471.761
0.182598	0.170853	-472.373
0.183585	0.0666683	-472.176
0.160081	0.188086	-472.353
0.141877	0.160755	-473.039
0.1331	0.12533	-472.54
0.252893	0.197252	-470.045
0.249095	0.112284	-468.347
0.194661	0.215026	-468.615
0.0509294	0.0220346	-470.81
0.057558	0.0286075	-469.237
0.0544676	-0.0468994	-469.146
0.107151	0.09187	-474.258
0.0967177	0.078899	-473.75
0.0753924	0.137553	-473.864
0.0709866	0.195214	-474.65
0.0649563	0.174348	-476.457
0.0824471	0.214182	-471.934
0.0652398	0.0399521	-471.608
0.0511007	0.173138	-472.76
0.0498046	0.0425437	-468.537
-0.11357	-0.208782	-473.677
-0.117013	-0.129812	-473.662
-0.147543	0.0504205	-467.781
0.315217	0.0669149	-465.746
0.177246	-0.0516161	-465.638
0.217113	0.335694	-465.951
0.109631	0.0397978	-466.711
0.0546601	0.106531	-465.841
0.0272262	0.0323655	-463.941
-0.0574286	-0.235061	-466.241
0.227993	-0.317126	-394.991
0.261844	-0.310321	-392.422
0.216434	-0.289073	-392.976
0.15937	0.0318213	-394.341
0.302154	0.0281458	-391.062
0.279123	-0.0829394	-391.861
0.234254	0.0196892	-390.905
0.224589	0.0306364	-390.853
0.224512	-0.0116911	-392.753
0.220108	0.043314	-392.151
0.175887	0.0458908	-388.505
0.244429	0.209539	-394.175
0.237598	0.172347	-393.723
0.290368	0.179408	-392.969
0.251373	0.167048	-391.61
0.23883	0.205036	-393.426
0.23622	0.109409	-390.9
0.228649	0.229229	-391.5
0.221768	0.120281	-391.44
0.208852	0.219408	-391.225
0.206787	0.0790033	-393.397
0.200919	0.19831	-391.513
0.201599	0.106946	-390.491
0.189045	0.12608	-393.031
0.177468	0.0893783	-391.539
0.175603	0.121707	-392.83
0.13281	0.226808	-392.856
0.283467	0.157551	-387.238
0.25665	0.228826	-388.466
0.170657	0.126248	-389.787
0.260785	0.310793	-390.549
0.234971	0.304841	-388.583
0.160069	0.32297	-388.661
0.130435	-0.023604	-391.83
0.0823092	-0.189206	-392.587
0.0725583	0.0379697	-391.513
-0.0195376	-0.00788258	-390.997
0.126837	0.0215195	-388.13
0.0623365	0.00455548	-389.614
-0.034093	-0.130798	-388.181
0.129012	0.0537017	-393.099
0.114415	0.21874	-392.321
0.109978	0.200858	-392.808
0.101486	0.112038	-391.752
0.100628	0.089627	-393.146
0.0845384	0.0686028	-392.004
0.0813076	0.157587	-391.695
0.0757619	0.26392	-391.157
0.104814	0.180496	-388.922
0.0914726	0.19137	-389.526
0.0735921	0.0499962	-389.679
-0.0390114	-0.0469771	-390.95
-0.0385499	-0.0953592	-390.671
-0.0997414	-0.226594	-392.394
-0.152321	-0.0291066	-391.636
-0.163991	-0.0337316	-390.848
-0.0533205	-0.148172	-388.904
-0.145533	-0.16986	-389.28
-0.164284	-0.211232	-389.258
0.290863	0.246103	-385.361
0.18112	0.179089	-385.844
0.019933	-0.119494	-384.897
-0.016774	-0.115279	-385.511
0.0479723	-0.0771922	-383.61
-0.142864	-0.125376	-385.183
0.289971	0.126052	-313.144
0.298473	0.147563	-314.453
0.287939	0.224877	-316.485
0.292503	0.191592	-312.29
0.228456	-0.330778	-318.38
0.211453	-0.22715	-318.38
0.208366	-0.259678	-313.169
0.162358	-0.290876	-313.341
0.285611	0.0715156	-318.38
0.28855	-0.0383806	-313.898
0.269953	0.050514	-314.413
0.259993	0.0355864	-315.426
0.261566	-0.117596	-316.01
0.212052	0.0954119	-315.883
0.191702	0.0775504	-315.19
0.138304	0.0783392	-314.28
0.138506	0.0584117	-316.469
0.123218	0.0433734	-316.123
0.210475	-0.0429833	-311.392
0.158899	0.0561993	-313.275
0.148391	0.0671422	-312.772
0.140806	-0.0693536	-312.834
0.261302	0.123794	-318.38
0.243462	0.124672	-318.38
0.225711	0.196043	-318.38
0.219257	0.156234	-318.38
0.249316	0.221693	-314.578
0.242896	0.19472	-313.847
0.243695	0.166663	-315.356
0.240111	0.21136	-314.33
0.227971	0.168221	-314.703
0.214695	0.147149	-314.62
0.211383	0.180232	-316.089
0.197599	0.273756	-314.257
0.201641	0.152355	-313.656
0.196313	0.226698	-315.649
0.162319	0.186483	-313.944
0.160382	0.235181	-314.858
0.118226	0.244363	-315.965
0.232928	0.237828	-312.136
0.205192	0.199601	-312.176
0.198785	0.127575	-312.051
0.198014	0.139203	-312.528
0.153929	0.162872	-313.319
0.134512	0.237784	-312.262
0.133198	0.153845	-312.908
0.145838	0.3523	-309.976
0.10785	0.0742399	-316.066
0.0877467	0.0688744	-314.1
0.0661189	0.0613461	-314.283
0.05695	-0.000767247	-313.759
0.0958457	0.0907529	-313.31
0.0725614	-0.0840073	-312.635
0.0649302	0.0840405	-312.983
0.0511464	-0.0470561	-312.631
0.0428853	-0.0137886	-312.33
0.0419395	-0.0252115	-312.682
0.0171527	-0.0382074	-311.53
0.0546339	0.0625974	-310.004
0.0230015	-0.0671562	-309.138
0.0774776	0.196667	-314.31
0.0800019	0.123348	-310.913
0.0518744	0.31083	-311.184
0.0222225	0.112203	-312.456
-0.0760813	-0.18654	-312.527
-0.190377	-0.274507	-311.019
-0.198677	-0.280601	-311.019
-0.107898	-0.172687	-313.703
-0.124927	-0.103313	-314.012
-0.133119	-0.129831	-314.949
-0.0639424	0.0891032	-312.486
-0.0604489	-0.0652262	-311.958
-0.056866	-0.163422	-311.786
-0.0653548	-0.141039	-313.212
-0.0812481	-0.117446	-312.409
-0.118603	-0.172574	-313.388
-0.125992	-0.145452	-313.292
-0.166925	-0.160252	-311.128
-0.163572	0.271268	-310.1
0.324483	0.192088	-233.166
0.238313	-0.265392	-238.38
0.292086	-0.00710381	-238.38
0.286383	0.0147833	-238.38
0.258788	-0.045181	-238.38
0.198268	0.032528	-238.38
0.197329	0.0168168	-238.38
0.173328	0.0145124	-238.38
0.148357	0.0753777	-238.38
0.253304	0.020728	-235.458
0.175088	-0.0170019	-234.275
0.264617	-0.0812608	-231.043
0.266166	0.119341	-238.38
0.25911	0.179422	-238.38
0.245424	0.18773	-238.38
0.246743	0.126991	-238.38
0.233447	0.171681	-238.38
0.227774	0.228488	-238.38
0.206162	0.324816	-238.38
0.214053	0.151255	-238.38
0.179238	0.214084	-238.38
0.184255	0.127011	-238.38
0.170105	0.141332	-238.38
0.152945	0.102425	-238.38
0.147117	0.0877471	-238.38
0.130509	0.143926	-238.38
0.120361	0.169912	-238.38
0.23024	0.237035	-233.615
0.224235	0.253363	-233.768
0.219682	0.315325	-235.51
0.225194	0.196934	-234.113
0.201308	0.14494	-234.96
0.207532	0.200514	-231.991
0.170918	0.312456	-228.222
0.124774	0.0312745	-238.38
0.104076	0.0283928	-238.38
0.0656262	0.0458165	-238.38
0.0659283	0.0317587	-238.38
0.0763891	0.0476342	-231.81
0.0649567	0.0657097	-230.417
0.0128283	-0.0486547	-232.427
0.0669742	-0.00507171	-229.356
-0.00204052	0.0378644	-228.315
0.0924305	0.206401	-238.38
0.0891994	0.196054	-238.38
0.0836834	0.193843	-238.38
0.0867538	0.118315	-238.38
0.0804005	0.184735	-238.38
0.0777853	0.201248	-235.272
0.0625323	0.118571	-235.129
-0.136262	-0.1474	-238.38
-0.221593	-0.143169	-238.38
-0.0855924	-0.0968108	-236.524
-0.130871	-0.174909	-232.429
-0.171327	-0.19851	-231.619
0.358359	-0.00906513	-153.448
0.249658	-0.198895	-150.711
0.207732	-0.236408	-151.534
0.332904	-0.333579	-148.638
0.177928	-0.247632	-149.171
0.276084	0.0664739	-158.38
0.237313	-0.121357	-153.667
0.186433	-0.0112607	-155.17
0.34502	-0.11685	-153.153
0.344388	-0.13571	-153.005
0.244401	0.0616306	-152.825
0.193681	0.0447189	-152.814
0.194921	-0.0425919	-149.062
0.272396	0.0975223	-155.154
0.264219	0.106335	-155.957
0.209123	0.13161	-156.724
0.196763	0.0948521	-154.371
0.184853	0.160395	-153.813
0.264512	0.0921711	-153.297
0.226637	0.179042	-152.819
0.21152	0.186829	-150.856
0.193191	0.199432	-151.909
0.181207	0.279865	-151.633
0.174018	0.229428	-152.98
0.27449	0.154021	-148.086
0.273677	0.177913	-148.179
0.218393	0.109749	-147.75
0.16286	0.284933	-148.899
0.142047	0.0460076	-154.482
0.161836	-0.133017	-150.758
0.1481	-0.0248594	-151.096
0.132577	-0.000879848	-150.874
0.107799	0.0495992	-151.038
0.0479064	0.00213894	-152.365
0.150331	-0.0467169	-149.598
0.0924004	-0.0422762	-148.385
0.156833	0.187259	-151.094
0.156542	0.235066	-149.577
0.147339	0.308399	-147.383
0.110873	0.0921327	-149.815
0.0751498	0.147417	-148.611
0.0675353	0.121043	-148.506
0.0594375	0.197775	-149.744
-0.123162	-0.235996	-151.381
-0.147837	-0.214747	-148.234
-0.149235	-0.151736	-147.518
-0.0617075	0.0772132	-148.256
-0.0675819	0.0892455	-148.537
0.195611	0.0330378	-146.31
0.227289	0.207949	-145.64
0.197646	0.221998	-145.305
0.245344	0.316105	-142.48
0.0875203	0.0403314	-144.601
0.161257	0.115689	-146.579
0.147723	0.325686	-145.198
0.151577	0.0861968	-144.965
0.0799415	0.112718	-145.136
0.0698698	0.241598	-146.076
0.0818924	0.321855	-140.96
0.0953136	0.28812	-138.94
-0.0410136	-0.0751717	-145.857
-0.142154	-0.165754	-145.205
-0.181761	-0.0900773	-145.145
0.401685	-0.0954857	-78.38
0.391299	-0.0130732	-78.38
0.353964	-0.0164933	-78.38
0.338629	-0.129063	-78.38
0.313186	-0.0780859	-78.38
0.23023	-0.23187	-78.38
0.227017	-0.264847	-75.6171
0.147176	-0.319633	-75.6279
0.217148	-0.191616	-78.38
0.190414	0.0422705	-78.38
0.141063	0.00561096	-78.38
0.242184	0.232703	-78.38
0.240502	0.162305	-78.38
0.236989	0.19722	-78.38
0.228165	0.175566	-78.38
0.214121	0.187336	-78.38
0.210913	0.16567	-78.38
0.205654	0.229054	-78.38
0.205357	0.200037	-78.38
0.204576	0.146599	-78.38
0.200969	0.177355	-78.38
0.192371	0.308617	-78.38
0.193845	0.0906714	-78.38
0.185775	0.296635	-78.38
0.161426	0.188067	-78.38
0.148843	0.223765	-78.38
0.213102	0.249255	-74.2621
0.205533	0.25925	-73.5615
0.191123	0.172457	-75.7492
0.134168	0.250681	-72.3393
0.215942	0.330838	-71.0283
0.132552	0.0498886	-78.38
0.0706117	0.0265386	-78.38
0.0647056	-0.000534743	-78.38
0.0632474	0.0290595	-78.38
0.0504691	0.00863855	-78.38
0.0325011	-0.0419806	-78.38
0.0213306	0.0109326	-78.38
0.00246833	-0.0696806	-78.38
0.000924586	-0.0924358	-78.38
0.0301314	0.0239273	-75.5091
0.0866578	0.0838533	-78.38
0.0655506	0.187883	-78.38
0.129371	0.189517	-71.559
0.0775078	0.213606	-71.8235
0.126905	0.28531	-69.4067
-0.0907506	-0.226261	-78.38
-0.133813	-0.228764	-78.38
-0.0561112	-0.110165	-78.38
-0.139808	0.113983	-78.38
-0.147889	0.120767	-78.38
0.391739	-0.157465	1.62
0.34719	0.0391595	1.62
0.342998	-0.00994794	1.62
0.330878	0.0447289	1.62
0.353516	0.0067979	8.8673
0.232477	-0.207971	1.62
0.226466	-0.23317	1.62
0.277133	-0.306979	5.28079
0.302263	0.067155	1.62
0.284736	0.0479166	1.62
0.302052	-0.0653384	4.74288
0.284002	0.0175787	3.96603
0.220956	0.0762247	5.92438
0.160593	-0.0701513	8.97987
0.314258	0.1617	1.62
0.307851	0.12247	1.62
0.266864	0.172216	1.62
0.2453	0.151583	1.62
0.244562	0.170272	1.62
0.242678	0.136987	1.62
0.228176	0.116165	1.62
0.227066	0.128306	1.62
0.221331	0.146875	1.62
0.213973	0.180541	1.62
0.207008	0.225256	1.62
0.194289	0.160057	1.62
0.191504	0.228723	1.62
0.183371	0.150652	1.62
0.173157	0.168676	1.62
0.245815	0.190728	4.13402
0.224235	0.205611	4.63869
0.268556	0.205749	8.63915
0.206637	0.264048	9.44481
0.203398	0.152208	6.80187
0.181284	0.235649	10.3759
0.124676	0.060674	1.62
0.119687	0.0547398	1.62
0.0519673	-0.127545	1.62
0.0452779	0.035854	1.62
0.0375116	-0.0140044	1.62
0.0321959	0.00381406	5.41665
0.0493475	0.0135432	8.03149
0.127518	0.187979	1.62
0.0721469	0.121867	1.62
0.0612527	0.188313	1.62
0.103382	0.311153	4.44261
0.0795955	0.198516	5.82704
0.108644	0.148238	7.14136
0.0397325	0.100288	7.35935
-0.080157	-0.150751	1.62
-0.0843293	-0.193371	1.62
-0.135075	-0.143937	1.62
-0.0837388	-0.0828102	3.99956
-0.0770967	0.0607503	9.49187
-0.0753706	-0.0851436	10.3814
0.344399	-0.0308351	91.0445
0.327729	0.144794	87.548
0.214037	-0.223349	84.5291
0.266555	0.0570889	81.62
0.266222	-0.0517313	81.62
0.259768	0.0417823	81.62
0.244981	-0.139351	81.62
0.237189	0.0310597	81.62
0.231657	-0.00560009	81.62
0.227428	0.0256935	81.62
0.217392	0.00835244	81.62
0.186224	0.0231001	81.62
0.178813	-0.209788	81.62
0.177474	0.0508872	89.7111
0.3219	0.0434241	90.4575
0.2676	0.149815	81.62
0.251299	0.202533	81.62
0.250128	0.154625	81.62
0.244896	0.135292	81.62
0.230346	0.130669	81.62
0.227501	0.158246	81.62
0.221185	0.218108	81.62
0.217936	0.249994	81.62
0.205554	0.13811	81.62
0.194414	0.155945	81.62
0.183472	0.163227	81.62
0.172796	0.161318	81.62
0.166208	0.204371	81.62
0.164744	0.135361	81.62
0.14583	0.19959	81.62
0.137205	0.131196	84.452
0.319725	0.14457	89.3848
0.285285	0.104306	88.6296
0.274282	0.0903725	88.6295
0.23436	0.206092	89.5683
0.227401	0.197765	88.0611
0.213966	0.195453	88.5771
0.20045	0.176601	87.7751
0.15293	0.0801168	89.939
0.178203	0.347259	84.655
0.13858	0.33601	87.341
0.124214	0.0556856	81.62
0.0986758	0.0420709	81.62
0.0648968	0.0324694	81.62
0.0106297	-0.0890743	92.5051
0.130169	0.107535	81.62
0.120018	0.0723952	81.62
0.116894	0.154121	81.62
0.0997799	0.0795292	81.62
0.0689049	0.141998	81.62
0.000957468	0.067036	81.62
0.109501	0.0894996	83.8539
0.0930128	0.190011	83.287
0.124454	0.300523	87.4867
-0.072343	-0.167963	81.62
-0.106229	-0.131825	81.62
-0.108898	-0.193744	81.62
-0.161745	-0.21937	81.62
-0.20832	-0.0965301	81.62
-0.20039	0.0851978	87.128
0.34134	-0.120422	161.62
0.282358	-0.218742	161.62
0.283446	0.0815238	161.62
0.255406	0.0623632	161.62
0.21896	0.0718213	161.62
0.209598	0.0329054	161.62
0.199552	-0.123727	161.62
0.19437	0.0733538	161.62
0.18318	0.0933207	161.62
0.134388	-0.0464747	161.62
0.286643	0.0388457	163.275
0.191268	0.021636	164.504
0.285089	0.123143	161.62
0.270757	0.0985653	161.62
0.255231	0.281548	161.62
0.242435	0.143304	161.62
0.235901	0.0975178	161.62
0.217263	0.196508	161.62
0.216652	0.184204	161.62
0.208002	0.118011	161.62
0.193296	0.226641	161.62
0.17699	0.189631	161.62
0.173795	0.136566	161.62
0.24012	0.117474	163.606
0.212163	0.161438	165.739
0.207111	0.193079	164.322
0.187191	0.231647	164.539
0.146002	0.226985	164.501
0.118035	0.0161222	161.62
0.105562	0.060063	161.62
0.097878	0.0904676	161.62
0.0587217	0.0298276	161.62
0.114496	0.176996	161.62
0.0765964	0.10362	161.62
0.0733373	0.274722	161.62
0.0732143	0.216528	161.62
0.0695238	0.115184	165.147
0.0500897	0.15516	163.561
-0.0939571	-0.269206	161.62
-0.136632	-0.21498	161.62
0.295964	0.030088	240.7
0.336956	-0.0376184	242.762
0.307223	0.0511794	244.678
0.236671	-0.296334	251.189
0.292421	-0.270539	242.046
0.284744	-0.262019	242.009
0.256624	-0.0148425	237.895
0.245718	-0.00650873	237.911
0.241069	0.0156074	237.58
0.225112	-0.0370564	238.795
0.256462	0.0344083	241.655
0.210139	-0.0023406	244.019
0.248641	-0.27085	252.096
0.153763	-0.0441782	249.788
0.184655	0.157271	235.887
0.179127	0.120703	236.637
0.141642	0.190452	235.955
0.130431	0.129664	237.233
0.116478	0.202162	239.416
0.269329	0.285367	238.339
0.173621	0.0993933	243.842
0.140009	0.141982	244.697
0.150749	0.0735256	247.433
0.0179441	-0.100575	243.193
0.0899346	-0.116275	250.162
0.0702422	0.0324149	246.382
0.0622267	-0.0761177	250.505
0.0322924	0.025376	250.642
0.09568	0.0801609	238.674
0.0886776	0.144921	237.607
0.0536119	0.227067	236.662
0.1128	0.113099	241.117
0.0971635	0.109949	241.21
0.0047742	0.0835474	242.797
0.107673	0.263631	242.024
0.0417258	0.132269	246.372
-0.0948672	-0.314411	250.595
-0.180735	-0.0791673	252.188
-0.133992	0.220386	239.46
-0.0820789	0.145651	247.228
-0.322285	0.254419	248.814
0.319469	0.0993051	326.961
0.296577	0.293548	328.623
0.298689	0.152857	327.808
0.322615	0.237321	330.998
0.308822	-0.314605	325.102
0.237228	0.0609497	321.62
0.196944	0.0929567	321.62
0.148188	0.0950742	321.62
0.131403	0.0872127	321.62
0.283009	-0.00254959	324.314
0.280974	0.0169001	326.418
0.259431	-0.022309	325.766
0.246686	0.0615942	323.717
0.236881	0.0249975	324.219
0.216796	0.025144	324.465
0.205648	0.0380675	325.116
0.182618	0.016777	323.952
0.254769	0.120433	325.302
0.201255	0.212772	325.906
0.195622	0.239837	326.401
0.220173	0.260649	328.967
0.221432	0.213948	329.346
0.221491	0.159265	328.202
0.183002	0.248124	329.035
0.182805	0.217384	327.473
0.175555	0.118641	327.657
0.161548	0.143595	327.248
0.110413	0.195853	328.787
0.112697	0.139674	327.535
0.103171	0.0565739	321.62
0.0141018	0.038862	321.62
0.0113914	0.0739833	321.62
-0.00338797	0.0717847	321.62
-0.0106964	0.0710518	321.62
-0.029293	-0.112279	321.62
-0.0312164	-0.176572	321.62
-0.0352306	-0.113956	321.62
-0.048385	-0.110244	321.62
-0.0588017	-0.122401	321.62
0.104554	-0.0555268	329.564
-0.0020444	0.0278349	330.207
0.0830222	0.27642	324.807
0.0848707	0.165021	323.734
0.0557412	0.325181	324.924
0.0618882	0.186796	325.226
0.0770077	0.210203	328.921
0.0683253	0.25269	328.64
0.0639287	0.286315	326.702
0.00529945	0.150275	327.251
0.0919311	0.219968	330.09
-0.0872544	-0.103314	321.62
-0.10722	-0.0437704	321.62
-0.199969	-0.214207	321.62
-0.0922721	-0.116063	324.864
-0.124235	-0.137749	328.275
-0.138122	-0.0499213	327.441
-0.145543	-0.202812	327.81
-0.169967	-0.153862	326.52
0.299815	0.0927402	401.62
0.364701	-0.0145987	407.755
0.310039	0.269747	409.164
0.310712	0.12988	407.625
0.204367	-0.225189	401.62
0.203666	-0.25628	401.62
0.1821	-0.23727	401.62
0.247792	-0.225885	405.039
0.208479	-0.308884	404.196
0.202859	-0.286727	405.025
0.23787	-0.329371	407.772
0.217457	0.0793413	401.62
0.141031	0.00963525	401.62
0.135503	0.0528359	401.62
0.133186	-0.0206057	401.62
0.134465	-0.115473	401.62
0.290956	0.0502027	405.99
0.165658	-0.0421841	403.6
0.255942	0.196589	401.62
0.207505	0.171785	401.62
0.192397	0.149549	401.62
0.176669	0.175896	401.62
0.166182	0.191515	401.62
0.161797	0.172936	401.62
0.159998	0.197685	401.62
0.150029	0.204942	401.62
0.118956	0.244658	401.62
0.25875	0.259543	403.246
0.257951	0.15242	404.05
0.253762	0.165378	404.619
0.192729	0.178754	405.518
0.194332	0.128393	405.423
0.272966	0.184099	408.659
0.243019	0.301347	407.938
0.220988	0.233333	408.394
0.216412	0.201516	406.799
0.119897	0.0967323	401.62
0.119407	0.0217949	401.62
0.101216	-0.0328147	401.62
0.0959178	-0.0431709	401.62
0.0865514	-0.0300356	401.62
0.0807241	0.0245568	401.62
0.0683454	0.0388663	401.62
0.0555147	0.039197	401.62
0.0437416	0.00536756	401.62
0.0118286	0.00410846	401.62
-0.00522882	0.0197329	401.62
-0.0211815	0.00964082	401.62
0.106644	0.0145672	403.916
0.066396	-0.117419	403.287
0.0159269	-0.0378541	404.469
0.0164165	-0.133419	408.108
0.110991	0.250238	401.62
0.101042	0.251033	401.62
0.0918573	0.170088	401.62
0.0785113	0.160479	401.62
0.076598	0.196387	401.62
-0.0129118	0.0965151	401.62
0.114809	0.261012	407.813
-0.126643	-0.149617	401.62
-0.132151	-0.0732208	401.62
-0.0754135	0.188493	406.258
-0.222675	-0.324925	401.62
0.315454	-0.14737	488.422
0.344882	0.0393756	491.283
0.335769	-0.0639854	489.995
0.302425	-0.0670915	481.62
0.246748	0.0624822	481.62
0.236318	0.0596869	481.62
0.166212	0.0467852	481.62
0.229912	0.0473178	484.46
0.178236	0.0687853	485.424
0.272573	0.106495	481.62
0.254257	0.178641	481.62
0.254641	0.125798	481.62
0.228977	0.0994122	481.62
0.215385	0.163887	481.62
0.209122	0.12405	481.62
0.206195	0.100176	481.62
0.18923	0.135287	481.62
0.172712	0.0833969	481.62
0.155713	0.224818	481.62
0.288693	0.143835	484.142
0.248103	0.176314	484.277
0.194322	0.193919	485.349
0.252426	0.217051	488.985
0.21805	0.0864583	488.137
0.180728	0.15416	489.22
0.140542	0.107941	488.878
0.272917	0.153497	490.658
0.239498	0.100052	490.17
0.222964	0.198134	490.408
0.193281	0.164197	491.693
0.147895	0.203157	491.672
0.0852345	0.0164989	481.62
0.0355155	-0.0876799	481.62
0.0335038	-0.003102	481.62
0.0232774	-0.00984368	481.62
0.01304	-0.061421	484.458
0.0365009	-0.0573902	488.129
-0.002272	-0.00374589	488.746
0.0888746	0.148513	484.387
0.108615	0.197141	490.175
-0.145073	-0.248933	485.359
-0.0999045	-0.107112	481.62
-0.120145	-0.0688878	481.62
-0.128977	-0.0821136	481.62
-0.111556	-0.197639	485.59
-0.125489	-0.00646612	485.034
-0.113346	-0.164433	487.421
-0.116002	-0.0897948	489.077
-0.120708	-0.209074	488.105
-0.0823091	0.273193	481.62
-0.310069	0.153244	481.62
-0.31503	0.228825	481.62
-0.340316	0.149367	481.62
0.483607	0.0783729	571.254
0.230745	-0.0158908	569.544
0.190846	-0.0363498	567.935
0.174312	-0.0482229	569.358
0.163893	0.0555472	567.746
0.296719	0.0744115	571.687
0.197398	0.0797431	570.978
0.181536	0.0523062	570.381
0.32852	0.228176	567.528
0.295445	0.192428	569.652
0.242519	0.165073	568.496
0.18351	0.140449	568.497
0.299813	0.219543	569.883
0.244026	0.174485	570.204
0.215267	0.245938	571.429
0.200835	0.347212	572.223
0.178188	0.0906437	572.245
0.134877	0.0494891	569.526
-0.0146118	-0.0896799	569.141
0.116397	0.0422212	571.448
0.145667	0.202906	568.013
0.0752787	0.206285	568.673
0.0950574	0.135462	570.317
0.0218135	0.144765	571.237
0.00822342	0.132157	571.322
-0.155481	-0.223252	569.958
-0.171899	-0.0454015	567.265
0.408557	0.281936	575.443
0.27546	-0.112872	573.67
0.267665	0.018662	574.677
0.281021	0.118168	574.867
0.23841	0.24763	573.442
0.209192	0.256263	575.429
0.193696	0.204655	574.006
0.169538	0.196157	573.503
0.263864	0.209865	578.62
0.24775	0.193108	578.056
0.124704	-0.0216364	574.272
0.0502571	-0.0124082	574.111
0.0477856	0.186789	574.375
-0.0905523	0.00664902	577.284
-0.116535	-0.120817	577.612
-0.243518	0.0279925	577.968
-0.0844803	0.264885	575.174
-0.102927	0.245653	574.565
0.184931	0.0406761	649.461
0.299711	0.0421606	651.711
0.290904	-0.00952381	651.35
0.198498	0.0482759	652.542
0.292423	0.0775403	648.612
0.259966	0.0970355	648.866
0.247067	0.173102	648.861
0.227157	0.213357	649.067
0.220839	0.17422	649.516
0.213542	0.155279	648.451
0.235657	0.192712	649.831
0.231029	0.12042	651.485
0.226173	0.283294	651.844
0.221824	0.22816	652.057
0.216797	0.0818182	651.381
0.205061	0.173257	650.639
0.194199	0.188475	651.918
0.178253	0.146184	651.89
0.0981637	-0.0305375	651.473
0.073453	0.0323082	652.566
0.0535137	0.0446019	652.396
0.156129	0.241171	651.757
0.110184	0.221879	650.53
0.104224	0.189466	651.129
-0.0586094	-0.0429548	648.421
-0.0717143	-0.0513911	648.764
-0.0889389	-0.161716	648.341
-0.110453	-0.196799	651.648
-0.14962	-0.0688161	650.299
0.277692	-0.0695569	654.371
0.162423	0.045294	654.547
0.297468	0.151759	654.225
0.254127	0.226888	654.776
0.182466	0.171162	655.575
0.168451	0.199803	655.288
-0.0160037	0.0295315	656.859
0.0958883	0.190349	655.45
0.0626682	0.220781	654.336
0.0240119	0.135726	655.26
-0.121879	-0.123434	654.367
-0.159613	-0.196763	655.814
0.37154	-0.103972	730.699
0.368952	-0.0787397	731.892
0.327282	-0.0603554	729.267
0.308052	-0.0594189	728.819
0.298474	0.00481572	729.076
0.18236	0.0329389	729.659
0.32929	0.0170287	731.492
0.316834	-0.0619526	729.883
0.31569	-0.134768	729.958
0.250318	-0.0990519	732.953
0.196868	0.0967631	729.476
0.237789	0.186006	731.446
0.236408	0.131424	730.059
0.224686	0.200915	731.377
0.192869	0.115152	731.433
0.148184	0.0289733	729.038
0.0995512	-0.0302819	731.138
0.0939824	-0.0606227	731.901
0.0800397	-0.0545254	732.412
0.0528926	-0.0583179	730.511
0.0475803	-0.0515943	731.09
0.0402041	-0.0499117	731.303
0.0313557	-0.0229302	731.964
0.0282784	-0.045821	732.759
0.0147655	0.0487048	729.955
0.0683232	0.13543	729.178
0.138408	0.0962262	730.239
0.127674	0.200221	731.408
0.101083	0.096755	730.41
0.0950415	0.155276	730.011
0.0810208	0.0856445	732.004
-0.234148	0.244077	728.982
-0.192652	0.319548	730.903
-0.214113	0.131431	730.425
0.313585	-0.00653034	733.35
0.303499	0.0307686	735.27
0.208108	-0.14016	733.636
0.284834	0.243432	734.148
0.270367	0.2565	733.326
0.158334	0.0800355	733.898
0.0344062	0.0166853	734.505
0.0811938	0.13005	734.182
-0.277097	-0.00915169	734.814
0.261681	0.0225327	807.296
0.25206	-0.101946	809.195
0.241432	-0.0967629	807.901
0.199306	-0.102582	806.933
0.190621	-0.111046	806.963
0.201092	0.207053	801.62
0.209641	0.195807	804.985
0.187909	0.145933	804.348
0.157141	0.191099	804.97
0.151423	0.252865	805.094
0.271985	0.267682	810.11
0.102044	-0.00172184	801.62
0.12334	-0.0161828	806.072
0.0689779	0.0376817	806.324
0.14862	-0.0342152	806.529
0.130674	-0.023946	807.994
0.0605648	0.0179692	808.633
0.0498584	-0.0791896	807.716
0.0437939	0.00751538	807.976
0.0326877	-0.0644546	808.832
0.0345814	0.0276486	810.583
0.140946	0.123168	804.226
0.114971	0.19588	808.39
0.0858683	0.245422	806.778
0.0818086	0.262166	806.774
0.0812421	0.126533	808.903
-0.287507	-0.0340466	803.51
-0.0956834	-0.0954445	807.212
-0.201746	0.225767	805.337
-0.195529	0.240001	807.338
0.193588	-0.0404095	881.519
0.311157	-0.0293503	884.965
0.302366	-0.0342631	885.325
0.219656	-0.0895692	887.39
0.161318	0.0152902	887.444
0.21502	-0.0152403	890.959
0.281992	0.0674942	881.157
0.21541	0.235524	880.794
0.209769	0.163914	880.983
0.204314	0.173707	880.964
0.196484	0.172451	880.975
0.185644	0.203101	880.907
0.161126	0.176738	881
0.160998	0.257769	880.792
0.153339	0.196613	880.957
0.301229	0.10301	885.161
0.22896	0.149258	883.704
0.174188	0.168396	885.22
0.24142	0.207672	887.131
0.20849	0.219355	887.679
0.194228	0.207134	887.875
0.182259	0.150347	886.344
0.229644	0.201227	892.05
0.126631	0.0546128	881.35
0.119004	0.0561156	883.61
0.0968802	-0.000841378	884.606
0.0852555	0.00592321	883.242
0.0767369	0.000465727	885.64
0.0648307	0.0205844	885.671
0.154074	-0.167777	888.049
0.146885	0.0209019	888.677
0.102098	0.0106365	886.916
0.0728759	0.0393102	887.244
0.0681652	0.000534936	887.854
0.0424697	0.0393635	886.675
0.0330917	0.0415111	890.724
0.0302513	0.0486019	890.939
0.0759301	0.26563	886.495
0.00630002	0.0640178	887.949
-0.0623187	-0.0960966	892.988
-0.111945	0.045598	890.482
-0.122412	-0.0637108	892.367
-0.135848	-0.218804	890.556
-0.127831	0.119022	883.49
-0.143383	0.112893	885.862
-0.102006	0.132307	886.725
[truncated: 202 more rows]

## Sheet: Sheet2
0.399403	0.0311176	-1918.1
0.414746	-0.255975	-1836.92
0.311177	-0.0618716	-1831.9
0.329904	-0.0579703	-1838.38
0.407546	-0.0347809	-1756.22
0.288049	-0.132458	-1678.38
0.297379	-0.120499	-1678.38
0.318497	-0.368887	-1597.73
0.307355	-0.0450585	-1518.38
0.326997	-0.0353778	-1518.38
0.307529	-0.132359	-1436.93
0.277247	-0.0219402	-1431.9
0.278174	0.0441898	-1435.14
0.329198	0.041831	-1358.38
0.337188	0.0510711	-1345.02
0.361317	0.0796399	-1357.27
0.332867	0.115713	-1278.19
0.346551	-0.0305684	-1195.14
0.327474	-0.0483643	-1038.38
0.415582	-0.144994	-956.726
0.409035	-0.121257	-955.706
0.36661	-0.0537105	-875.723
0.381231	-0.035904	-876.904
0.329604	-0.203735	-796.004
0.340237	-0.183576	-785.42
0.37064	-0.148616	-791.9
0.367782	-0.0938723	-711.9
0.347933	0.00934641	-718.38
0.341952	-0.159632	-638.38
0.36176	-0.150696	-638.38
0.29722	-0.108268	-638.38
0.309508	-0.0925965	-558.38
0.303109	-0.0567985	-558.38
0.351519	-0.0303402	-558.38
0.361119	-0.0728548	-555.838
0.367368	-0.137066	-477.919
0.335421	-0.123051	-471.9
0.393986	-0.0494959	-476.342
0.378343	-0.0263237	-478.183
0.382527	-0.0585778	-395.14
0.351123	-0.12637	-391.9
0.354638	-0.0779444	-391.9
0.344619	-0.0178426	-395.14
0.308403	-0.0304951	-388.66
0.384983	-0.127182	-318.38
0.387392	-0.0958481	-315.14
0.355405	-0.105056	-315.14
0.305646	-0.213761	-318.136
0.336552	-0.0568065	-315.14
0.374959	-0.130182	-238.38
0.370026	-0.0848602	-238.38
0.336997	-0.267566	-237.508
0.311913	-0.172668	1.62
0.377781	-0.112906	244.294
0.370413	-0.174582	580.61
