# Supplementary material for: Spinal premotor interneurons controlling antagonistic muscles are spatially intermingled
Source: eLife. 2022 Dec 13;11:e81976. doi: 10.7554/eLife.81976 (PMC9844990; doi:10.7554/eLife.81976)
Supplement: Figure 12—figure supplement 2—source data 1. — The x-y coordinates are normalized (between –0.5 and 0.5) and scaled to an idealized spinal cord of dimensions 1700 μm and 900 μm in the mediolateral and dorsoventral directions respectively, while z coordinates are in micron, with the axis origin taken at the border between L4 and L5 and negative values in the rostral direction. [file elife-81976-fig12-figsupp2-data1.xlsx]

## Sheet: Sheet1
0.234831	0.176562	-4784
-0.133009	-0.203152	-4798
-0.0999283	-0.111218	-4566
0.200172	-0.107725	-4546
0.0663639	0.0397604	-4292
0.152936	0.135556	-4320
0.0951586	0.0800444	-4064
-0.0705012	-0.0241917	-4062
0.343915	-0.0130646	-4052
0.0588344	-0.00354843	-4056
0.169542	0.0506439	-4058
0.165711	0.145057	-3608
0.170601	0.127296	-3604
0.249109	-0.202054	-3330
0.188167	0.0504789	-3350
0.184569	0.160364	-3350
0.257863	0.128874	-3350
0.233333	0.111727	-3350
0.129784	-0.00284765	-3360
0.173475	0.134348	-3362
0.200146	-0.199674	-3108
0.226855	-0.204401	-3118
-0.13866	-0.140629	-3094
-0.0931225	-0.133443	-3108
-0.118858	-0.169875	-3122
0.20185	0.161232	-3090
0.167625	0.0765801	-2616
0.188159	0.124215	-2630
0.187521	0.140689	-2642
0.13433	0.0325813	-2612
0.171968	0.0603731	-2636
0.257941	0.128836	-2644
0.0993811	0.094786	-2642
0.181313	0.0773374	-2372
0.136517	0.0845264	-2402
0.149761	0.0927941	-2368
0.235827	0.0977331	-2370
0.210676	0.0514786	-2376
0.165525	0.0211586	-2386
0.190808	0.0421649	-2388
0.096141	0.197561	-2386
0.302858	-0.151525	-2390
0.145314	0.0158204	-2392
0.265943	-0.0761725	-2398
0.327033	-0.254154	-2402
0.292763	-0.166555	-2146
-0.203027	0.102364	-2162
0.169393	-0.0574373	-2160
0.216198	0.13404	-1900
0.254461	0.125955	-1910
0.228687	0.0314828	-1912
0.23962	-0.0818721	-1890
0.280892	-0.0983708	-1898
-0.161186	-0.103612	-1902
0.153826	0.000710113	-1904
0.2769	-0.00197702	-1914
0.173201	0.080501	-1918
0.218108	0.123172	-1914
-0.153738	-0.0364302	-1922
-0.135755	0.0749312	-1922
0.117581	0.129707	-1906
-0.166294	-0.0921904	-1914
0.128202	0.0662109	-1654
0.242694	-0.120222	-1672
0.230682	0.0158906	-1676
0.240235	0.0451227	-1684
0.189612	-0.0136477	-1664
-0.141333	-0.0700063	-1670
-0.104572	-0.0708493	-1670
0.119757	0.183956	-1672
0.146224	0.0491947	-1682
0.183714	0.0924558	-1652
0.225264	-0.112529	-1654
-0.169772	-0.0994209	-1656
0.205176	0.117804	-1650
0.287201	0.0747656	-1664
0.102276	-0.017591	-1672
0.318199	0.0331558	-1666
0.213281	-0.102293	-1678
0.224034	0.0380232	-1684
-0.201829	-0.106573	-1430
0.11326	0.0611394	-1428
0.245507	0.0370638	-1430
0.264725	0.0764405	-1412
0.12027	0.0833647	-1408
0.280387	0.209228	-1412
0.186404	0.139727	-1414
0.12257	0.128907	-1420
0.176706	0.0803218	-1424
0.176145	0.139192	-1438
0.289249	0.0402223	-1434
0.263819	0.150568	-1430
0.236026	0.185929	-1424
0.235712	0.0232268	-1426
0.209886	0.0218407	-1416
-0.0724586	-0.125969	-1428
-0.13926	0.0139608	-1438
-0.0712635	-0.0758323	-1438
0.20788	0.0897246	-1186
0.276165	0.0432594	-1190
0.235213	0.0276134	-1172
0.180377	-0.012214	-1172
0.22008	0.123435	-1174
0.240362	0.10187	-1180
0.314857	0.0480819	-1180
0.227031	0.0326346	-1182
0.250605	0.00242499	-1190
0.385613	-0.148007	-1174
0.224342	-0.176415	-1182
-0.143403	-0.192676	-1192
-0.0924781	-0.128143	-942
-0.131556	-0.119806	-944
-0.168792	-0.168079	-948
0.248031	0.168799	-962
0.193943	0.201177	-968
0.136462	0.106496	-930
0.274024	0.0682034	-932
0.172295	0.156189	-936
0.310369	0.097891	-940
0.245935	-0.165076	-944
0.322975	0.0453748	-940
0.268403	-0.0645919	-934
0.297768	-0.0847973	-932
0.298863	-0.0611661	-936
0.342852	-0.0134653	-936
0.223451	0.0580673	-944
0.25407	-0.0986936	-946
-0.101184	-0.195687	-950
-0.214247	-0.191698	-942
-0.220268	-0.193286	-938
0.27804	0.0405717	-948
0.281429	0.0382516	-952
0.172289	0.15653	-954
0.207423	0.0490521	-956
0.241172	0.0539654	-958
0.18142	0.055721	-952
0.0494998	0.169762	-952
0.10345	0.0970371	-960
0.192564	0.141697	-968
0.280824	0.0913236	-966
0.107887	0.0972977	-966
0.291797	-0.279076	-968
0.291671	-0.051639	-930
0.224056	-0.21673	-932
0.194909	-0.0460123	-936
-0.0931308	-0.218494	-942
0.166225	-0.0230877	-946
0.0943135	0.0749343	-948
0.257319	0.101692	-958
0.0948173	0.119658	-966
0.21698	0.193688	-942
0.205837	0.132105	-950
0.075926	0.22732	-932
0.22694	0.177756	-698
0.280448	-0.0355109	-704
0.324006	-0.0897936	-724
0.303253	0.0139962	-690
-0.116992	-0.163287	-690
-0.127041	-0.138245	-694
-0.051294	-0.0749176	-700
-0.0689901	-0.124739	-702
-0.213244	-0.0279129	-704
0.234017	0.230221	-706
0.204841	0.0674292	-706
0.165831	0.119085	-708
0.128165	0.125295	-708
0.155322	0.0896125	-712
0.173765	0.0759	-708
0.195629	0.136981	-710
0.229643	0.132797	-722
0.261025	0.103737	-722
0.25412	0.145212	-722
0.266806	0.226031	-724
0.164812	0.213967	-728
0.230677	0.111459	-726
0.243176	0.12083	-736
0.207798	0.143501	-702
0.286512	0.0587799	-694
0.200481	0.111521	-728
0.229102	0.138788	-714
0.222929	0.127638	-714
0.162247	0.171785	-710
0.258173	0.0393583	-710
0.0451639	0.104369	-480
0.303505	0.00731657	-446
0.105282	0.243192	-446
0.165649	0.176553	-448
0.199462	0.124073	-450
0.242755	0.115361	-452
0.185006	0.165561	-456
0.158562	0.0209055	-454
0.209832	-0.00166254	-456
0.195591	-0.071936	-452
0.162342	0.0331616	-456
0.229184	-0.0503847	-470
0.235103	-0.0241687	-470
0.182359	-0.00809288	-470
0.338964	-0.14763	-470
0.277095	-0.255146	-474
0.207942	-0.231884	-478
-0.0948108	-0.113449	-476
-0.0564091	-0.158818	-480
-0.106769	-0.150964	-480
0.211131	0.193298	-480
0.222602	0.16625	-480
0.247769	0.148458	-478
0.130841	0.113188	-478
0.25113	0.0625939	-474
0.175111	0.125785	-460
0.174689	0.0876575	-462
0.223863	0.172848	-460
0.1903	0.0205581	-476
0.186506	0.0672449	-448
0.126872	0.0416066	-448
0.120978	0.072984	-450
0.178307	0.151899	-446
0.196194	0.151194	-448
0.195359	0.102239	-446
0.12442	0.0997946	-452
0.111562	0.0453612	-470
0.296265	0.0720109	-476
0.205624	0.206807	-480
0.29934	0.00995341	-208
0.281227	-0.00154014	-222
0.263777	-0.102668	-226
0.29836	-0.141547	-236
0.260717	-0.243786	-242
0.177367	-0.149493	-250
0.326637	-0.292656	-246
0.279493	-0.135792	-242
-0.105827	-0.132584	-234
0.0868502	0.188944	-230
0.27878	0.114695	-226
0.279552	0.0252612	-220
0.188672	0.0156499	-220
0.255595	0.16633	-222
0.18741	0.181462	-214
0.15501	0.112753	-216
0.149223	0.0468525	-210
0.00181701	0.0521339	-212
0.117551	0.0153457	-214
0.149629	0.217894	-242
0.232211	0.214399	-214
0.27122	0.205681	-218
0.294598	0.0422184	-216
0.285662	0.0785601	-220
0.262863	0.0762754	-222
0.238152	0.131199	-224
0.239811	0.118015	-228
0.194272	0.132752	-230
0.0874938	0.170026	-240
0.0960392	0.132823	-242
0.09848	0.0849935	-240
0.189667	0.112093	-236
0.125077	0.0572729	-240
0.155169	0.0305619	-242
0.226211	0.0659004	-244
0.131394	0.0656415	-242
0.219383	-0.0304325	-208
0.103129	-0.190219	-214
0.223572	-0.246974	-222
0.255104	-0.299458	-228
0.252169	-0.107575	-228
0.309531	-0.147405	-212
0.324755	-0.166194	-4
0.207278	-0.0570463	20
0.0758838	-0.0522698	22
0.249535	-0.11995	22
0.234588	-0.101181	28
0.0655887	0.0955602	26
-0.012162	0.0298886	24
0.10509	0.0276618	12
0.105701	0.0488897	6
-0.0473707	-0.110008	2
0.0909296	0.214236	4
0.131398	0.207779	4
0.216442	0.144897	30
0.241432	0.161879	30
0.263196	0.196399	26
0.197097	0.0873927	22
0.231203	0.157672	22
0.108672	0.190566	12
0.0369619	0.17571	4
0.224772	0.12276	0
0.293702	0.108166	262
0.307732	0.0906982	258
0.0942556	0.115355	230
0.12729	0.191583	240
0.291488	0.228499	270
0.162399	0.00894577	266
0.143309	0.0204882	266
0.188887	0.0486354	260
0.173614	0.0360605	272
0.240686	-0.0323543	266
0.192629	-0.1101	258
0.191757	0.0307439	250
0.253534	0.0527115	252
0.30655	-0.0161347	252
0.231589	-0.0335177	250
0.253744	-0.115917	252
0.200783	-0.168228	246
0.225178	0.0112111	242
0.172437	0.0286095	238
0.242018	0.0554468	234
0.140334	0.037224	240
0.289244	0.0551771	246
0.208688	-0.0410689	238
0.193415	0.00349817	264
0.275744	-0.325045	264
0.243536	-0.357792	266
0.171991	-0.266431	254
-0.141708	-0.0271453	238
0.0490112	0.0373048	512
-0.22274	-0.0904206	512
-0.119722	-0.1475	510
0.0320313	0.195094	512
0.259736	0.165747	506
0.168853	0.0721485	494
0.205943	0.113522	490
0.271501	0.21409	484
0.261728	0.17971	480
0.367856	0.0119093	746
0.191472	0.0999184	750
0.352595	-0.132103	738
0.252524	-0.00709242	740
0.283641	-0.0349921	740
0.251108	-0.12916	734
0.358454	-0.151705	734
0.245302	-0.236097	730
0.152856	-0.0206589	728
0.401032	-0.118135	724
-0.117287	0.052278	722
-0.168154	-0.014567	728
-0.108189	-0.157788	730
0.127982	-0.0128691	724
0.165734	0.154823	716
0.0829085	0.157395	736
0.197704	0.0495088	710
0.165537	0.056162	714
0.113106	0.172407	716
0.184677	0.21825	720
0.238331	-0.00236832	740
0.208984	0.157206	744
0.100567	0.154072	992
0.0897272	0.178885	1216
0.162045	0.0482263	1202
0.166371	0.0042484	1196
0.303281	0.111209	1228
0.16632	0.14446	1228
0.220393	0.107602	1230
0.116956	0.0940114	1228
0.206429	0.0054435	1232
0.261803	0.0403343	1232
0.319722	0.0417262	1228
0.154102	-0.00278369	1212
0.246269	-0.0585522	1200

## Sheet: Sheet2
0.377781	-0.13967	-722
0.29194	-0.0583796	-474
0.302198	-0.105462	-950
0.286168	-0.142079	-954
0.357182	-0.113561	-962
0.313785	-0.0987909	-700
0.286477	-0.0910136	-712
0.336802	-0.100538	-714
0.341289	-0.129747	-706
0.277423	-0.183131	-698
0.370646	-0.0464124	-450
0.33587	-0.218509	-448
0.298465	-0.0406068	-478
0.341223	-0.335717	-214
0.310272	-0.238477	-224
0.364926	-0.172982	-240
0.355645	-0.0844871	248
0.314602	-0.0804501	244
