# Supplementary material for: Spinal premotor interneurons controlling antagonistic muscles are spatially intermingled
Source: eLife. 2022 Dec 13;11:e81976. doi: 10.7554/eLife.81976 (PMC9844990; doi:10.7554/eLife.81976)
Supplement: Figure 12—figure supplement 2—source data 2. [file elife-81976-fig12-figsupp2-data2.xlsx]

## Sheet: Sheet1
0.219697	0.118617	-5010
0.291425	0.126381	-4532
0.247803	-0.123731	-4288
0.184239	-0.0643924	-4296
-0.149163	-0.0514249	-4084
0.314919	-0.103885	-3836
-0.151414	-0.0954658	-3682
0.316502	0.0270949	-3688
0.117844	-7.92466e-05	-3676
0.114928	0.161478	-3678
0.157078	0.178629	-3366
0.21805	0.147295	-3366
0.0596059	0.0499993	-3098
0.25613	0.0845527	-2880
0.0947975	0.166684	-2880
0.312929	0.0622052	-2884
0.316038	-0.114358	-2676
0.0905781	0.130305	-2668
0.238829	0.116866	-2688
0.126662	0.114203	-2666
0.153377	0.0189765	-2688
0.190426	0.0070312	-2378
0.317442	0.0553733	-2370
0.279691	-0.241816	-2374
-0.0992001	-0.149269	-2386
0.25196	0.111469	-2390
0.100889	0.0744147	-2400
0.196495	0.117485	-2372
0.0835844	0.152093	-2170
0.210599	0.12691	-2174
0.264992	0.229005	-2182
0.196335	0.0855981	-2194
0.379933	-0.0400089	-2200
0.255774	-0.071522	-2206
0.275262	0.170283	-2212
0.27028	0.137687	-2212
0.0979203	0.164012	-2172
-0.147672	-0.204803	-2178
0.0242968	0.00204265	-2194
0.18226	0.116491	-2192
0.232963	0.140308	-1894
0.267918	-0.25276	-1912
0.232681	0.164326	-1910
0.305873	-0.167934	-1906
-0.235761	-0.0477326	-1896
-0.0796358	-0.118979	-1610
-0.179969	-0.174615	-1614
0.233902	0.159351	-1618
0.187696	0.0448425	-1622
0.178979	0.06209	-1630
0.129824	0.0783277	-1640
0.381923	0.189994	-1608
-0.142381	-0.0707813	-1616
-0.188105	-0.10302	-1618
0.0554213	0.01101	-1618
0.182116	0.0189917	-1624
0.0386854	-0.0831155	-1636
-0.171654	-0.0932838	-1638
-0.218601	-0.143851	-1608
-0.16641	-0.120483	-1612
0.314223	0.248858	-1614
0.308922	0.130733	-1614
0.0632412	0.105372	-1620
0.0217418	0.0424587	-1624
0.106714	0.0137988	-1628
0.182693	-0.0328563	-1634
-0.113843	-0.00559323	-1638
0.158564	0.16243	-1640
0.289092	0.0125206	-1636
0.338199	-0.0667883	-1642
0.241185	-0.285816	-1414
-0.14434	-0.220651	-1416
-0.149464	-0.35371	-1422
-0.0511171	-0.0458443	-1424
0.128686	0.236478	-1418
0.263433	0.0895279	-1424
0.166824	0.0582816	-1424
0.152372	0.16137	-1438
0.283867	0.0753807	-1436
0.208492	-0.057516	-1440
0.251617	0.0667828	-1426
0.0355435	0.186363	-1188
0.165558	0.121052	-1200
0.183672	0.169554	-1200
-0.0280277	0.0286542	-1200
0.148932	0.184979	-1198
0.242231	0.0248278	-1196
0.268809	0.0754061	-1198
0.270469	-0.0576743	-1190
0.246618	-0.0974416	-1174
0.276832	-0.074547	-1172
0.25057	-0.025496	-1198
0.11409	0.130233	-1198
0.322187	-0.0917877	-1200
0.231485	-0.0168245	-1192
0.295788	0.0228225	-1190
0.296121	-0.059743	-1182
0.0132219	-0.0415913	-1172
0.081698	0.0575066	-954
-0.0409231	-0.0858967	-948
-0.099071	0.00490008	-960
0.0573956	0.0556642	-928
0.00437619	-0.0440413	-928
0.299206	-0.0899647	-930
0.288817	-0.0933195	-934
0.134975	0.0107049	-936
0.183399	-0.0473763	-938
0.282333	0.00813599	-940
0.281844	-0.0588472	-936
0.257871	0.0104738	-944
0.142822	0.0630473	-944
0.204753	0.193705	-944
0.0328022	0.104956	-940
0.067949	0.25213	-942
0.132708	0.0663691	-958
0.102113	0.242376	-956
0.154281	0.0629813	-954
0.24919	0.0318968	-956
0.253094	0.0678021	-956
0.253671	0.128954	-958
0.178979	0.168947	-926
0.158108	0.184387	-930
0.200529	0.157453	-930
0.0847495	0.209257	-958
0.141392	0.225337	-958
0.191905	0.147506	-940
0.278582	0.030297	-956
0.261617	0.00691993	-960
0.182464	-0.0130732	-942
0.228966	0.0462981	-690
0.275549	-0.0505016	-690
0.0211497	0.0343551	-706
0.365328	0.155629	-690
-0.0549691	-0.142044	-696
0.123494	0.0831419	-702
0.203181	0.0893775	-702
0.196733	0.206955	-704
0.219021	0.115726	-700
0.286117	0.228081	-710
0.32856	0.125091	-712
0.141034	0.0910025	-708
0.194354	0.0832099	-716
0.194154	0.031352	-716
0.285542	-0.0970265	-720
0.294045	-0.0554632	-712
0.174809	-0.0343678	-702
0.242015	-0.117018	-720
0.269747	-0.013537	-720
0.228819	-0.337473	-722
0.219306	-0.327859	-706
-0.240584	0.17789	-712
-0.0685841	-0.153179	-688
0.0286987	-0.0405748	-688
0.127493	0.239145	-720
0.166542	0.0998247	-714
0.234217	0.152499	-698
0.260049	0.160673	-700
0.234913	0.161423	-716
0.276086	0.149022	-690
0.207726	0.0849211	-710
0.195464	0.110396	-470
0.108179	0.280897	-484
0.194233	0.141402	-462
0.266198	0.196754	-450
0.246432	0.160799	-460
0.261223	0.156362	-462
0.281846	0.285973	-466
0.0874829	0.180477	-478
0.163888	0.134658	-452
0.214467	0.0877603	-454
0.217313	0.132653	-456
0.171741	0.377245	-456
0.152686	0.0355556	-462
0.229543	0.0129758	-468
0.136098	-0.011034	-470
0.138357	0.0617245	-480
0.253838	0.05449	-482
0.207861	-0.196088	-482
0.225851	-0.203708	-480
0.315395	-0.176656	-466
0.352201	0.0354925	-468
-0.0476687	-0.0602931	-470
-0.134517	-0.0735163	-476
-0.0582759	-0.0684586	-480
0.0911115	0.107636	-260
0.159693	0.119921	-226
0.23674	0.0839578	-234
0.177695	0.0988846	-240
0.229929	0.104981	-240
0.20656	0.139746	-242
0.0719582	0.234285	-242
0.096158	0.195733	-250
0.205937	0.183461	-252
0.174908	0.123607	-254
0.18767	0.109765	-258
0.169852	0.151372	-264
0.315782	0.122064	-264
0.152255	0.0330614	-260
0.131927	0.0203972	-260
0.180747	-0.115974	-258
0.190307	0.0223936	-246
0.218879	0.0425712	-244
0.2132	0.0497252	-242
0.240315	-0.25769	-238
0.178209	-0.19765	-236
0.262473	-0.269895	-232
0.336657	-0.206221	-222
0.275528	-0.0963425	-222
0.190698	-0.235616	-220
0.303769	-0.0321563	-232
-0.123447	-0.166671	-226
0.26659	-0.00968283	-224
0.0426741	0.0199123	-210
0.0937452	0.0399497	-230
0.0552567	0.0299146	-264
0.195563	0.127884	8
0.121929	0.169426	6
0.326249	0.136083	0
0.272731	0.168018	-2
0.327242	0.14573	-2
0.188344	0.00717266	30
0.263758	0.0202414	30
0.275631	-0.0161286	26
0.290337	0.0620731	18
0.154704	-0.00418515	16
0.226755	0.00705421	14
0.374287	0.0134438	14
0.178862	0.038706	12
0.214928	0.0995749	10
0.237903	0.0926852	10
0.325833	0.104109	10
0.281863	0.0915863	4
0.222436	0.117816	0
0.334096	-0.261572	0
0.237415	-0.192859	6
0.351425	-0.121639	14
-0.0547773	-0.0931732	30
0.136173	0.081352	26
0.180402	0.0683865	26
0.228788	0.097557	28
0.13403	0.0893467	24
0.127513	0.0893988	22
0.0667735	0.205353	22
0.119668	0.0910037	22
0.263642	0.223527	18
0.237043	0.165119	16
0.0760036	0.170305	4
0.10115	0.146187	2
0.196092	0.111719	20
0.14716	0.118294	18
0.0587744	0.0683642	12
0.207644	0.119075	2
0.109825	0.0336137	0
0.128811	0.0103055	-8
0.0963224	-0.0453235	252
0.201146	-0.0364074	242
0.0664018	0.0034327	222
0.0835586	-0.023063	252
0.165331	0.0321574	248
0.141073	-0.00596636	244
0.280891	0.059931	228
0.212877	-0.210301	226
0.215846	-0.246538	220
0.197912	-0.195879	250
0.163337	-0.123644	252
0.327017	-0.104036	252
0.149314	0.0243038	252
-0.16999	0.0403043	246
0.0289849	0.0194349	248
-0.00216262	-0.071982	242
-0.141397	-0.172131	238
-0.107792	-0.182774	234
0.230805	0.106337	238
0.0741386	0.160186	228
0.214733	0.0823935	218
0.0798572	0.147732	242
0.205502	0.106079	252
0.210277	0.14643	252
0.1331	0.286189	224
0.067733	0.110019	242
0.183252	0.166823	246
0.230428	0.160609	248
0.311983	0.0227931	240
0.233035	0.17038	244
0.245701	0.129408	240
0.222038	0.144724	246
0.190068	0.0565133	234
0.292713	0.0275394	226
0.192294	0.0576437	486
0.159574	0.0299655	476
0.252833	-0.0814615	504
0.258982	-0.0239367	504
0.357703	-0.136494	498
0.261696	-0.146932	492
0.2039	0.0209289	490
0.239422	-0.0733503	508
0.171863	-0.0934001	512
0.218028	-0.152154	720
0.235077	0.0120973	754
0.177504	0.0345598	742
0.16164	-0.192591	744
0.266834	-0.182457	742
0.194297	-0.194905	746
0.240225	-0.219793	742
0.192275	-0.237622	736
0.255847	-0.219529	730
-0.146725	-0.114664	720
-0.0941257	-0.208803	968
-0.047011	-0.116261	992
0.125961	0.245806	984
0.266203	0.249311	974
0.231639	0.143396	968
0.113113	0.217545	1220
0.268017	0.174215	1234
0.22747	0.186532	1234
0.221368	0.169654	1452
0.213651	-0.0166658	1448
0.229128	-0.0184374	1448
0.13651	0.0622826	1708
0.180039	0.0540431	1708
0.104632	0.120114	1708
0.224596	0.119031	1926
0.148246	0.0204022	1936
0.246631	-0.0290734	1948
0.227804	-0.0358118	1916
0.100524	0.12472	1926

## Sheet: Sheet2
0.327216	-0.0746162	-934
0.354559	-0.0792219	-930
0.33701	-0.100126	-948
0.152385	-0.233929	-932
0.316442	-0.172641	-692
0.2873	-0.171882	-700
0.367201	-0.0367845	-476
0.240239	-0.175982	-242
0.288987	-0.178768	-216
0.279124	-0.0781496	-208
0.312216	-0.0872366	-206
0.296728	-0.118844	6
0.368259	-0.114117	12
0.322143	-0.131536	28
0.281237	-0.203214	-2
0.299028	-0.140495	-216
0.304801	-0.126958	-208
0.314731	-0.121326	-222
0.304304	-0.0988052	-224
0.344509	-0.127391	18
0.263118	-0.18678	4
