# Supplementary material for: Spinal premotor interneurons controlling antagonistic muscles are spatially intermingled
Source: eLife. 2022 Dec 13;11:e81976. doi: 10.7554/eLife.81976 (PMC9844990; doi:10.7554/eLife.81976)
Supplement: Figure 12—figure supplement 2—source data 3. [file elife-81976-fig12-figsupp2-data3.xlsx]

## Sheet: Sheet1
-0.222301	-0.101581	-5010
0.0966811	0.14634	-5024
-0.276732	-0.278585	-5028
-0.193537	0.228426	-4780
0.0380152	0.218401	-4786
0.243638	0.193188	-4794
0.110255	0.0127359	-4802
-0.216095	-0.00010787	-4768
-0.17124	-0.198201	-4792
0.199663	0.18952	-4534
0.186044	0.0961651	-4540
0.28634	-0.0477829	-4562
-0.113326	-0.0724072	-4558
-0.204677	-0.245271	-4556
-0.210078	-0.230113	-4560
-0.189396	0.214454	-4306
0.0949435	0.115639	-4290
0.238217	0.137872	-4294
0.199409	0.0153667	-4296
0.196329	-0.0634942	-4298
0.258028	-0.151618	-4310
0.217365	0.104734	-4322
0.162141	-0.0101064	-4320
0.183786	0.227823	-4304
-0.03614	-0.0964704	-4064
0.135235	0.101829	-4072
0.152756	0.0223605	-4074
0.283138	-0.0601578	-4080
-0.134246	-0.078185	-4084
0.193738	0.0103169	-3810
0.146041	0.177888	-3812
0.164846	0.144609	-3818
0.0684589	0.136531	-3832
0.297704	-0.101857	-3826
0.31782	-0.0088489	-3808
-0.0920814	-0.123015	-3812
-0.154565	-0.251509	-3828
-0.107462	0.0496222	-3590
-0.0667073	-0.128055	-3588
0.10592	0.12615	-3590
-0.106339	-0.160557	-3580
0.209377	-0.128229	-3590
-0.0707327	0.101766	-3586
0.128225	0.204077	-3578
0.288864	0.230366	-3596
0.245579	0.156589	-3604
-0.175791	0.138571	-3338
-0.0765295	0.101981	-3344
-0.164273	-0.0647543	-3348
0.0642586	0.0807773	-3362
0.168395	0.0928691	-3330
0.339798	-0.00498237	-3332
0.27195	-0.0216592	-3334
0.267563	0.0509907	-3338
0.283133	-0.0510072	-3340
0.343574	-0.110051	-3344
0.265258	-0.0409266	-3352
0.331717	-0.0944747	-3354
0.218319	0.0877295	-3360
0.246685	0.0312019	-3360
-0.0573425	-0.140253	-3094
-0.10061	-0.0461516	-3126
0.0228731	0.011297	-3098
0.253329	0.0418078	-3088
0.331663	-0.0359787	-3088
0.173077	0.0231481	-3092
0.258955	0.0401699	-3098
0.170773	0.0254765	-3098
0.28702	0.0220963	-3104
0.27394	0.0687377	-3104
0.19721	0.263212	-3112
0.171069	-0.00513866	-3116
0.156162	-0.0687698	-3118
0.228634	0.00425546	-3122
0.17213	0.09472	-3114
0.173238	-0.149795	-2878
0.0370225	0.174443	-2606
0.0753758	0.216899	-2612
0.125683	0.0657372	-2612
0.163805	0.101067	-2616
0.154763	0.105709	-2622
0.147159	0.112253	-2622
0.117747	0.228139	-2632
0.15995	0.149966	-2634
0.206401	0.151348	-2630
0.0860671	0.21391	-2636
0.183057	0.254557	-2640
0.17722	0.107425	-2642
0.265474	0.0352208	-2620
0.280358	0.0527885	-2624
0.22444	-0.0970609	-2626
0.17712	0.0461589	-2628
0.310439	0.0121724	-2632
0.0715648	0.0255139	-2366
-0.0395295	-0.0893275	-2380
0.0553963	-0.0701018	-2400
0.0631061	0.0101477	-2402
0.0733589	0.0911634	-2370
0.126395	0.0429472	-2382
0.153857	0.0886626	-2384
0.192578	0.156647	-2384
0.100373	0.161699	-2388
0.241638	0.115557	-2390
0.264461	0.0379311	-2388
0.319033	0.0636835	-2386
0.321689	0.0446963	-2394
0.272989	0.0648617	-2398
0.217625	0.0729061	-2398
0.0932126	0.166939	-2402
0.0824102	0.0828153	-2402
0.2065	0.0356978	-2394
0.191861	-0.0540851	-2370
0.308042	-0.0732241	-2368
0.338951	-0.0161901	-2370
0.1753	-0.0157926	-2378
0.272041	-0.233326	-2390
0.3042	-0.2354	-2394
0.244505	-0.0240178	-2392
0.2789	-0.0262294	-2400
-0.0614829	-0.0695808	-2154
-0.179468	-0.103085	-2138
0.240799	0.139399	-2130
0.0757516	0.19747	-2132
0.114576	0.123616	-2132
0.128003	0.170406	-2142
0.0524253	0.0367662	-2144
0.0393807	0.00403578	-2144
0.314518	0.0360999	-2142
0.305039	0.00788011	-2144
0.248593	0.0707142	-2146
0.137257	0.00533764	-2150
0.165806	0.012988	-2146
0.106692	0.131465	-2144
0.157686	0.202593	-2154
0.24601	0.150832	-2158
0.180074	0.0123141	-2158
0.298683	0.054326	-2160
0.0546209	0.0977164	-2158
0.207225	-0.0229358	-2162
0.191384	-0.0695502	-2148
0.20545	-0.0751176	-2150
0.296128	-0.0947374	-2150
0.316051	-0.0924783	-2140
0.274503	-0.138572	-2132
0.092671	0.0785382	-1890
0.099015	0.0627278	-1904
-0.152148	0.0193451	-1910
-0.130197	-0.140321	-1914
-0.112485	-0.108618	-1918
-0.164089	-0.104555	-1918
0.213811	0.108892	-1890
0.250127	0.0656802	-1894
0.158571	0.173387	-1890
0.256217	0.0235169	-1892
0.122962	0.185457	-1896
0.194923	0.145904	-1902
0.218357	0.148938	-1906
0.19549	0.135395	-1908
0.176438	0.149692	-1910
0.161181	0.121551	-1906
0.13211	0.03271	-1902
0.295083	0.0339841	-1918
0.297463	0.0134196	-1914
0.106977	0.0898	-1918
0.216226	0.0636457	-1918
0.14674	0.289053	-1922
0.0641925	0.162207	-1920
0.109905	0.038882	-1920
0.254922	-0.00634333	-1918
0.146167	0.00159611	-1898
0.185526	0.0886012	-1892
0.296881	-0.0274216	-1888
0.295696	-0.123695	-1888
0.270812	-0.134676	-1904
0.232962	-0.258892	-1906
0.282116	-0.0501987	-1908
0.294605	-0.041951	-1912
0.110712	-0.0399233	-1908
0.323895	-0.119146	-1910
0.216514	-0.185299	-1918
0.224044	-0.197404	-1916
0.190327	-0.297082	-1916
0.189844	-0.122715	-1920
-0.0567167	-0.00409458	-1648
-0.0735304	-0.132134	-1652
-0.106239	-0.163553	-1650
0.0489121	0.0292863	-1656
-0.117283	-0.153417	-1660
-0.00787609	0.0619835	-1664
-0.134961	-0.13145	-1670
-0.25396	-0.132788	-1672
-0.043357	-0.0860011	-1674
-0.125116	-0.114879	-1676
0.0939191	0.282608	-1648
0.080895	0.265561	-1662
0.255698	0.0873313	-1662
0.0992102	0.24754	-1670
0.160629	0.127356	-1672
0.0953601	0.159221	-1676
0.111706	0.0834299	-1676
0.219695	0.191286	-1674
0.226229	0.188953	-1670
0.0702633	0.183149	-1680
0.153166	0.296237	-1682
0.203722	0.148066	-1682
0.256331	0.0300666	-1648
0.276598	0.0555035	-1650
0.250688	-0.132104	-1654
0.191424	-0.221799	-1656
0.136682	-0.0238764	-1656
0.104743	0.0115555	-1652
0.196264	-0.049462	-1660
0.293605	-0.109892	-1666
0.327045	-0.00963082	-1672
0.283831	-0.00639082	-1674
0.328293	0.0302152	-1670
0.245952	-0.166466	-1680
0.270763	-0.207605	-1674
-0.123672	-0.177138	-1424
-0.132734	-0.190154	-1432
-0.192028	0.196624	-1412
0.0917848	0.193299	-1412
0.199847	0.15331	-1414
0.0873048	0.171704	-1416
0.240591	0.214583	-1418
0.0728799	0.10048	-1414
0.198618	0.100958	-1414
0.193675	0.00800268	-1422
0.12022	0.0614283	-1420
0.138287	0.0135797	-1424
0.0827418	0.0870121	-1426
0.241215	0.146691	-1424
0.233576	0.137485	-1426
0.209392	0.112608	-1430
0.246461	0.139197	-1432
0.272961	0.000657585	-1434
0.333054	0.0216941	-1436
0.171036	0.0271533	-1434
0.138798	0.0553177	-1432
0.130365	0.0236482	-1434
0.116013	0.0101864	-1430
0.145867	0.0571602	-1436
0.10055	0.0895494	-1438
0.172674	0.119172	-1440
0.214535	0.118154	-1440
0.173615	0.00207822	-1438
0.259384	0.0449143	-1442
0.192291	0.0949093	-1440
0.180459	0.187629	-1442
0.132008	0.0647038	-1436
0.211903	-0.108042	-1416
0.20461	-0.169043	-1424
0.173123	-0.12849	-1426
0.0439619	-0.0298767	-1430
0.0795927	-0.0455098	-1436
0.214374	-0.152566	-1428
0.200227	-0.140053	-1430
0.230583	-0.205365	-1432
0.228692	-0.128396	-1434
0.345451	-0.156524	-1430
0.336266	-0.0419365	-1436
0.291407	-0.0244795	-1434
0.24513	-0.044753	-1436
0.208924	-0.199558	-1442
0.269602	-0.133713	-1440
0.21376	-0.225142	-1438
0.231115	-0.0161977	-1430
-0.276046	0.194245	-1168
-0.295255	0.000500153	-1168
-0.220745	0.229014	-1176
-0.291988	-0.079726	-1188
-0.0822267	-0.128233	-1174
-0.112892	-0.170125	-1180
-0.0838602	-0.195786	-1182
-0.109402	-0.17916	-1180
-0.0904366	-0.153458	-1184
-0.109142	-0.223101	-1194
-0.143266	-0.0976267	-1198
0.0394639	0.0172714	-1200
0.116238	-0.101878	-1200
0.145567	-0.0206112	-1186
0.239446	0.159291	-1168
0.291203	0.0214663	-1168
0.181881	0.157516	-1174
0.179653	0.0246608	-1178
0.234922	0.0412707	-1178
0.237547	0.135953	-1182
0.147137	0.0644068	-1190
0.22423	0.178224	-1196
0.174276	0.156919	-1196
0.206495	0.1325	-1196
0.204607	0.168503	-1196
0.262485	0.180878	-1200
0.25908	0.142415	-1200
0.215118	0.122941	-1198
0.225418	0.0306384	-1198
0.180688	0.0404317	-1200
0.105759	0.193842	-1198
0.0820622	0.0923912	-1194
0.225773	0.132645	-1194
0.244198	0.138179	-1196
0.0976654	0.101805	-1192
0.303158	0.112099	-1192
0.284579	0.0912054	-1176
0.180475	0.119545	-1170
0.247974	0.16576	-1186
0.116207	0.302439	-1198
0.20676	-0.0182072	-1170
0.32338	-0.0814524	-1172
0.265052	-0.100184	-1176
0.207041	-0.0774512	-1168
0.263837	-0.0541214	-1170
0.201064	-0.185968	-1174
0.230849	-0.2408	-1180
0.326584	-0.0334699	-1176
0.305163	-0.144246	-1180
0.247481	-0.120964	-1186
0.198863	-0.0497733	-1186
0.294179	-0.30874	-1190
0.328949	-0.30707	-1194
0.168298	-0.114575	-1196
0.268616	-0.12403	-1200
0.368625	-0.155007	-1172
-0.147431	-0.176573	-938
-0.056041	-0.0658148	-934
-0.0661572	-0.0784556	-942
-0.139823	-0.20935	-958
-0.133645	-0.174705	-958
-0.10411	-0.161528	-962
0.212828	0.140602	-930
0.249033	0.162448	-932
0.184948	0.143329	-934
0.191337	0.147568	-934
0.159993	0.169978	-934
0.272414	0.0902308	-936
0.177641	0.1527	-938
0.137999	0.104046	-936
0.116719	0.0661171	-932
0.175488	0.117113	-934
0.184915	0.193103	-940
0.190758	0.220988	-940
0.266485	0.180221	-944
0.288019	0.183636	-944
0.335289	0.0954177	-948
0.214359	0.117271	-950
0.123055	0.22186	-946
0.141789	0.0938651	-946
0.208454	0.103895	-942
0.212899	0.136212	-944
0.176851	0.0672987	-950
0.168381	0.0681987	-954
0.131027	0.143151	-954
0.158533	0.0953971	-958
0.0937973	0.140691	-958
0.275764	0.0199918	-942
0.15192	0.0526106	-942
0.0589744	0.184336	-948
0.176234	0.197802	-954
0.193792	0.160271	-956
0.223269	0.173557	-954
0.265964	0.150632	-958
0.289934	0.0529953	-962
0.183149	0.134934	-960
0.161663	0.148777	-954
0.190906	0.113479	-954
0.281306	0.163438	-952
0.207037	0.143975	-962
0.172305	0.0935353	-962
0.153853	0.180503	-960
0.0707655	0.149924	-964
0.215775	0.179424	-960
0.202333	0.0794449	-956
0.132429	0.046352	-944
0.25824	0.0220596	-936
0.160758	0.105036	-966
0.187178	0.10586	-966
0.217919	0.101566	-966
0.0793073	0.0852088	-966
0.148675	0.119009	-958
0.19572	-0.0322616	-930
0.20576	-0.0743267	-936
0.0352152	0.0249176	-932
0.254158	-0.0144477	-934
0.179924	-0.11137	-934
0.201204	-0.144772	-938
0.232701	0.00453421	-938
0.263255	-0.000549602	-942
0.212483	-0.0795892	-948
0.238003	-0.136858	-948
0.171363	-0.0659797	-950
0.133549	0.0328318	-954
0.224245	-0.137043	-960
0.179876	0.0166804	-962
0.135013	0.0440574	-964
0.0930364	0.0549739	-966
0.114456	-0.0462902	-964
0.218273	-0.194442	-962
0.33961	-0.0116447	-962
0.307529	-0.0602363	-960
0.199347	-0.232722	-930
0.240515	-0.304713	-942
0.242741	-0.259797	-944
0.214345	-0.234426	-946
0.193562	-0.243824	-956
0.228389	-0.258759	-958
0.0158922	-0.00800717	-692
-0.0429487	-0.0595596	-696
-0.182175	-0.151094	-692
-0.0730701	-0.16645	-702
-0.1749	-0.176242	-702
0.0474054	0.020788	-698
-0.140151	-0.0633141	-720
-0.114341	-0.169997	-726
0.218216	0.191613	-688
0.195128	0.196724	-688
0.189546	0.111219	-694
0.252025	0.142344	-692
0.269043	0.117525	-694
0.196038	0.142106	-696
0.223788	0.195245	-700
0.236771	0.203129	-700
0.245413	0.171645	-698
0.2459	0.240912	-704
0.234374	0.0352622	-702
0.100549	0.112982	-704
0.154732	0.101396	-706
0.187979	0.11338	-710
0.115923	0.18061	-714
0.103036	0.191965	-708
0.163354	0.176633	-712
0.146577	0.202141	-714
0.25419	0.0264352	-716
0.29108	0.0368713	-716
0.309861	0.0214316	-716
0.112055	0.236399	-720
0.0550978	0.0846845	-720
0.0903642	0.080838	-720
0.123445	0.0424418	-720
0.190255	0.139532	-724
0.196791	0.145922	-726
0.214653	0.130521	-726
0.227013	0.114989	-724
0.0946148	0.101319	-726
0.086425	0.0918411	-726
0.074904	0.143041	-722
0.223793	0.141708	-716
0.0475511	0.0996797	-696
0.0987901	0.0227726	-698
0.208523	0.107319	-702
0.183959	0.0523033	-692
0.190034	0.207428	-694
0.197068	-0.0347565	-700
0.164972	-0.0290327	-704
0.142809	0.00169338	-706
0.223622	-0.0545024	-714
0.220693	-0.0437828	-718
0.203419	-0.0272014	-726
0.254577	-0.105932	-728
0.286196	0.0216922	-734
0.304113	-0.000490391	-738
0.272796	-0.277033	-728
0.229018	-0.323888	-716
0.286739	-0.289921	-710
0.245116	-0.284036	-706
0.199263	-0.15537	-706
0.362813	-0.1279	-708
0.277072	-0.17425	-714
0.273514	-0.204961	-712
-0.116155	0.000252417	-448
-0.198579	-0.123613	-456
-0.154109	-0.185371	-456
-0.0824636	-0.117931	-478
0.0987078	0.0357527	-478
0.306441	-0.00337851	-446
0.314204	0.097349	-446
0.129181	0.232897	-450
0.306412	0.141658	-452
0.304035	0.111801	-448
0.187826	0.0309956	-450
0.234533	0.103711	-452
0.190123	0.144376	-454
0.175136	0.195222	-454
0.222987	0.00289956	-462
0.217695	0.0186789	-462
0.170235	0.0843398	-460
0.212823	0.0721331	-458
0.203268	0.12784	-462
0.183152	0.124396	-464
0.139474	0.141645	-466
0.106798	0.0559007	-466
0.0942668	0.0894399	-470
0.0978859	0.116934	-470
0.176171	0.0253906	-478
0.160976	0.00575382	-478
0.107139	0.0801134	-480
0.135429	0.0459464	-478
0.188236	0.105044	-474
0.17118	0.107148	-480
0.220834	0.0134364	-480
0.222656	0.0455905	-478
0.254703	0.0716736	-474
0.254555	0.232891	-470
0.259179	0.174964	-470
0.247336	0.087207	-470
0.256778	0.0840485	-470
0.162363	0.163676	-474
0.259778	0.021792	-474
0.166086	0.0353449	-472
0.283508	0.137587	-472
0.122428	0.150033	-478
0.100297	0.189889	-480
0.176012	-0.0441989	-474
0.138791	0.105342	-450
0.151545	0.100067	-446
0.0997326	0.101038	-448
0.12126	0.0504576	-448
0.0905337	0.1145	-452
0.116987	0.175255	-450
0.156233	0.201093	-464
0.123146	0.229441	-462
0.216234	0.205164	-460
0.287895	-0.0155075	-460
0.310744	0.0240444	-466
0.381018	-0.00880225	-464
0.0981285	0.0544898	-456
0.399985	-0.0659457	-472
0.215992	-0.283406	-472
0.202456	-0.244567	-474
0.199609	-0.275323	-476
0.143336	-0.0992065	-478
0.230449	-0.0524316	-470
0.279409	-0.148098	-466
0.235197	-0.26109	-452
0.234434	-0.28916	-448
0.241004	-0.290157	-460
0.280805	-0.255039	-458
0.3601	-0.292655	-460
0.0906741	0.0842104	-208
-0.224857	0.0867301	-208
-0.160941	-0.141021	-214
0.0996203	0.089319	-216
0.0515483	0.0141391	-222
0.0777908	0.0225763	-232
0.0439796	0.0269452	-232
-0.104164	-0.129217	-232
-0.168996	-0.0555008	-234
-0.242038	-0.0189009	-240
-0.163386	0.102688	-240
-0.132224	-0.137931	-244
-0.10196	-0.0919542	-238
-0.0914555	-0.155507	-234
-0.0837716	-0.137777	-236
-0.0976618	-0.166911	-232
-0.0987738	-0.199658	-238
0.0332502	0.0294263	-242
-0.13254	-0.145305	-218
0.088926	-0.0192862	-224
0.226425	0.117058	-204
0.238051	0.0966313	-206
0.242113	0.155692	-208
0.146325	0.189063	-212
0.0810267	0.182298	-216
0.123463	0.19955	-212
0.264353	0.192492	-210
0.274913	0.21765	-210
0.294824	0.231072	-208
0.188591	0.0967083	-210
0.169126	0.111233	-212
0.263562	0.231342	-214
0.220489	0.234563	-220
0.20977	0.113213	-218
0.308002	0.242268	-220
0.25976	0.156224	-222
0.206489	0.151446	-230
0.238822	0.176142	-238
0.187459	0.140852	-236
0.203939	0.0966082	-230
0.118399	0.139133	-228
0.0611607	0.108235	-226
0.137053	0.180672	-230
0.115098	0.071258	-220
0.136186	0.314581	-232
0.0334055	0.207556	-242
0.0394113	0.184209	-236
0.228749	0.0786242	-236
0.188802	0.158789	-240
0.0249652	0.0503151	-210
0.149235	0.0455302	-218
0.327187	0.13562	-240
0.313688	-0.116033	-208
0.327187	-0.0640921	-210
0.215871	-0.0935415	-214
0.265465	0.00777458	-212
0.194282	0.0208889	-218
0.205382	0.0170979	-216
0.302763	0.0207733	-214
0.374869	0.00490053	-220
0.196776	-0.0540059	-224
0.292194	0.012783	-244
0.170519	-0.0761277	-246
0.176304	-0.147093	-240
0.232145	-0.16238	-238
0.14392	0.062813	-238
0.140184	0.00827542	-236
0.172592	0.00017722	-230
0.275599	0.0379328	-224
0.259895	-0.145744	-218
0.320871	0.0186621	-238
0.145353	-0.184979	-244
0.285206	-0.231257	-242
0.279541	-0.211663	-240
0.286664	-0.202378	-242
0.227772	-0.245427	-236
0.197653	-0.239687	-236
0.300319	-0.328551	-230
0.213647	-0.291358	-224
0.277688	-0.26986	-216
0.226861	-0.190951	-218
-0.286458	0.119433	24
-0.174586	-0.14353	18
-0.139639	-0.100512	14
-0.146798	-0.120157	12
-0.123098	-0.141236	4
-0.0944581	-0.066367	-2
-0.235863	0.10003	-4
0.168419	0.311213	32
0.319393	0.108186	28
0.325884	0.00837239	28
0.338495	0.0300639	26
0.191608	0.0267496	24
0.160413	0.0613151	32
0.108626	0.169321	26
0.187683	0.235589	26
0.277971	0.15194	32
0.0601743	0.301796	22
0.24169	0.183846	20
0.227428	0.140142	22
0.195569	0.0923313	20
0.279706	0.118537	18
0.211049	0.0292786	10
0.204469	0.0317211	-2
0.173776	0.0542103	-4
0.218591	0.130496	-2
0.196682	0.173866	-6
0.130336	0.220137	-4
0.136346	0.232689	-2
0.28178	0.0278441	2
0.17687	0.0675233	18
0.228797	0.0423876	2
0.206936	-0.0289695	-2
0.226101	-0.0220316	2
0.230736	0.00438407	10
0.178255	0.025921	16
0.252326	-0.128795	16
0.213464	-0.0651117	14
0.232116	-0.128981	10
0.229357	-0.228868	10
0.255728	-0.136846	24
0.282246	-0.16934	26
0.214723	-0.202205	22
0.288517	-0.0939019	12
0.271725	-0.137607	0
0.283453	-0.0530169	0
0.276439	-0.0365256	4
0.254275	-0.231273	6
-0.303763	0.207312	242
-0.256886	-0.0690748	264
-0.101971	-0.138886	258
0.00823851	-0.056366	256
-0.114837	-0.197904	246
0.00304151	-0.0811278	230
-0.114852	-0.111821	232
-0.0939035	-0.130236	228
0.239533	0.213134	274
0.181341	0.0960154	272
0.132158	0.181632	268
0.226507	0.198079	268
0.247907	0.194137	268
0.251466	0.151704	266
0.118479	0.0576486	266
0.190455	0.0183345	262
0.203704	0.118496	262
0.233274	0.142996	264
0.237445	0.123772	264
0.229248	0.137159	260
0.300493	0.12383	262
0.207864	0.113118	256
0.299265	-0.0027181	256
0.148557	0.027611	256
0.147138	0.0663203	252
0.182408	0.1295	250
0.0885821	0.124785	246
0.0954528	0.0579109	250
0.119692	0.0708019	250
0.15633	0.108229	248
0.135858	0.0528828	244
0.258674	0.149007	242
0.206139	0.130943	242
0.215476	0.0629682	244
0.109588	0.0790509	240
0.206035	0.0484814	238
0.172408	0.0364139	236
0.164247	0.0695339	234
0.101178	0.0688926	234
0.217745	0.000910893	242
0.274192	-0.00611391	244
0.197403	0.0191943	248
0.106603	0.162671	244
0.0782814	0.237036	240
0.0411718	0.259736	252
0.108339	0.244112	260
0.0625557	0.363898	260
0.212792	0.129769	272
0.328976	0.016192	268
0.317722	-0.0171685	266
0.258415	-0.0806614	262
0.172138	-0.064054	262
0.228725	-0.260974	260
0.181589	-0.0232387	252
0.335017	0.00105664	252
0.289814	-0.19163	252
0.295768	-0.181413	252
0.259368	-0.127977	236
0.219258	-0.0823666	240
0.134562	-0.0440071	240
0.325437	-0.33131	250
0.169231	-0.0127015	232
-0.11736	-0.115046	502
-0.153191	0.047279	502
-0.133297	-0.154022	508
0.120876	0.222845	510
0.148547	0.186447	510
0.161705	0.170418	506
0.330257	0.042734	508
0.116436	0.0872388	498
0.15648	0.127264	482
0.343473	0.0500203	500
0.280856	-0.0118312	502
0.235958	0.0289681	482
0.319063	-0.113846	502
0.345083	-0.126667	496
0.20394	-0.242376	494
0.215483	-0.0516993	492
0.27949	-0.0246199	488
-0.132871	0.00346599	746
-0.123597	-0.153802	738
-0.135174	-0.0909788	722
-0.0403501	0.0507056	724
0.048854	0.101425	716
-0.177948	-0.207752	730
0.0843614	0.113356	744
0.111382	0.176834	752
0.212712	-0.0128352	746
0.17108	0.0409912	746
0.336614	0.0439808	744
0.23768	0.0971167	744
0.228116	0.0847579	738
0.12971	0.0792413	728
0.154866	0.198238	728
0.188343	0.0179928	726
0.239643	0.0235784	720
0.286001	-0.0264161	720
0.188815	0.0827695	716
0.291238	-0.0404665	744
0.255991	-0.0595915	742
0.289807	-0.178008	742
0.258487	-0.173085	728
0.204036	-0.250262	736
0.337889	-0.15965	710
0.168259	0.110386	998
-0.161835	-0.158704	996
0.225083	-0.122093	994
0.238759	0.0458486	992
0.226171	0.0538331	982
0.306191	-0.205282	976
-0.083892	-0.0476836	1218
-0.192438	-0.11218	1204
0.191501	0.0295787	1208
0.169658	0.0794642	1206
0.30165	0.0848288	1232
0.316002	0.0977727	1234
0.290103	0.0961945	1222
0.136898	0.0453608	1222
0.317877	0.0810424	1228
0.230991	-0.255893	1234
0.226444	-0.268054	1234
0.2885	-0.199014	1222
0.337241	-0.103016	1216
0.323593	-0.113211	1204
0.31482	-0.0836197	1202
0.319694	-0.139182	1206
0.282657	-0.0688303	1196
0.239122	-0.0410466	1474

## Sheet: Sheet2
0.322825	-0.193321	-1910
0.273161	-0.149218	-1672
0.314813	-0.0987771	-936
0.315549	-0.135779	-938
0.318033	-0.188431	-956
0.329097	-0.106959	-962
0.319236	-0.118077	-724
0.274913	-0.110494	-448
0.290677	-0.222076	-452
0.270878	-0.225571	-446
0.330092	-0.193772	-476
0.355639	-0.147172	-472
0.288592	-0.238276	-210
0.305568	-0.302392	-214
0.371452	-0.288414	-214
0.33959	-0.267826	-236
0.333759	-0.31761	-234
0.294903	-0.225164	30
0.33122	-0.129253	32
0.373775	-0.226062	242
0.389801	-0.140307	240
0.339447	-0.187833	234
0.328064	-0.121134	234
0.366629	-0.118941	234
0.377781	-0.13967	-722
0.29194	-0.0583796	-474
