# Supplementary material for: Spinal premotor interneurons controlling antagonistic muscles are spatially intermingled
Source: eLife. 2022 Dec 13;11:e81976. doi: 10.7554/eLife.81976 (PMC9844990; doi:10.7554/eLife.81976)
Supplement: Figure 12—figure supplement 2—source data 4. [file elife-81976-fig12-figsupp2-data4.xlsx]

## Sheet: Sheet1
-0.0799457	-0.100434	-5022
0.148603	0.135223	-4766
0.192481	0.27608	-4800
0.337784	0.0769882	-4536
0.235229	0.175539	-4540
0.220878	0.159683	-4542
0.158597	0.142276	-4556
0.198924	0.0402465	-4558
0.294085	0.00634511	-4564
-0.115267	-0.103424	-4564
-0.166098	-0.0850076	-4532
-0.147968	-0.135696	-4292
-0.146773	-0.0615652	-4318
0.143034	0.265877	-4308
0.282034	0.0128906	-4316
-0.0962183	-0.209057	-4058
-0.139551	-0.11026	-4062
0.241068	-0.0416279	-4050
0.134612	0.229954	-4062
0.277983	0.121766	-4068
0.282508	-0.0495773	-4086
0.192415	0.147406	-3806
-0.115056	-0.097572	-3818
-0.169624	-0.108589	-3670
-0.188169	-0.120028	-3656
0.169491	0.184491	-3666
0.243149	0.0651831	-3688
0.306597	-0.000611729	-3658
0.291139	0.00906038	-3656
0.243699	-0.030301	-3654
0.262966	-0.212888	-3690
0.0184324	-0.023911	-3346
-0.0750625	-0.0990157	-3346
-0.118743	0.0231785	-3336
0.124065	0.119698	-3094
0.0320026	0.00593976	-3112
0.158933	0.0564183	-3114
0.197557	0.144756	-3114
0.136568	0.158718	-3128
0.155576	0.0436732	-3130
0.182633	0.0519024	-3126
0.180205	-0.109682	-3096
0.148864	-0.106495	-3118
0.261015	-0.0434851	-3124
-0.102999	-0.0315554	-3120
-0.101786	-0.100179	-3102
0.187588	-0.00853045	-2858
-0.0535882	0.244727	-2868
-0.133524	0.0893432	-2872
-0.148621	-0.0250914	-2872
0.192147	0.00150767	-2868
0.250743	-0.0425976	-2884
0.211816	0.028513	-2882
0.223814	0.0846171	-2882
-0.160903	-0.0994907	-2862
0.186967	-0.111099	-2862
0.294903	-0.094374	-2870
0.320208	0.144385	-2866
0.32276	0.0189169	-2672
0.151898	0.0732899	-2672
0.140646	0.123021	-2672
0.102737	0.142798	-2668
0.171287	0.0992612	-2662
0.279444	0.0274278	-2652
0.16344	0.0458446	-2656
0.237895	-0.108816	-2660
0.274523	-0.166918	-2660
0.296083	-0.199549	-2666
0.339608	-0.150844	-2664
0.299063	-0.108562	-2664
0.315715	-0.141394	-2658
0.265321	-0.0160215	-2682
-0.189281	-0.172393	-2658
-0.128457	-0.240787	-2678
-0.0974449	-0.0991033	-2682
-0.122369	-0.136463	-2684
-0.0248438	-0.0190472	-2374
0.13464	-0.122756	-2394
-0.195756	-0.106746	-2402
0.178388	0.179923	-2402
0.306331	0.144713	-2396
0.175536	0.160553	-2398
0.101841	0.145827	-2396
0.14233	0.0805444	-2388
0.305866	0.0130157	-2384
0.336478	0.104602	-2382
0.112076	0.211195	-2380
0.193619	0.179498	-2376
0.265885	0.131144	-2374
0.236853	0.0686857	-2370
0.225739	-0.0578392	-2372
0.212352	-0.291289	-2370
0.347113	-0.0593194	-2374
0.262218	-0.176674	-2376
0.334906	-0.0311527	-2380
0.344312	-0.127359	-2378
0.365239	-0.144305	-2382
0.289699	-0.0869758	-2390
0.28995	-0.0559932	-2394
0.187367	0.181495	-2170
0.325714	0.0319873	-2172
0.284842	0.0790654	-2174
0.142714	0.0459883	-2184
0.27257	0.114489	-2182
0.185293	0.148545	-2188
0.0761656	0.266399	-2188
0.170478	0.256925	-2184
0.17337	0.127504	-2194
0.109476	0.117719	-2194
0.285303	0.240832	-2200
0.240116	0.0762653	-2200
0.16729	0.174407	-2208
0.280508	0.0354557	-2214
0.304313	0.0381286	-2192
0.332914	-0.0709194	-2214
0.271115	0.0119962	-2212
0.267465	-0.00638792	-2208
0.284704	-0.0369513	-2206
0.347695	-0.0696387	-2192
0.193019	-0.244181	-2186
0.183027	-0.147415	-2180
0.200713	-0.109867	-2172
0.265615	-0.122071	-2172
0.323692	-0.152634	-2174
0.261834	-0.274307	-2214
-0.0690911	-0.086042	-2170
-0.08986	-0.122667	-2174
-0.0516817	-0.130479	-2182
-0.126431	-0.00299111	-2176
-0.136885	-0.135515	-2178
-0.134889	-0.145124	-2190
-0.154913	-0.0830827	-2202
-0.064612	-0.117059	-2212
-0.189357	-0.112922	-2210
-0.10088	-0.142419	-1898
0.21349	0.267437	-1890
0.189023	0.109047	-1892
0.158558	0.128542	-1900
0.163396	0.0899227	-1902
0.0620968	0.139061	-1898
0.253592	0.157552	-1918
0.153739	0.129032	-1922
0.0981472	0.226091	-1924
0.240882	-0.133995	-1892
0.251093	0.038509	-1898
0.218342	-0.0539347	-1902
0.203886	0.0241185	-1900
0.303486	-0.13115	-1904
0.214456	0.0149437	-1914
-0.14778	-0.111658	-1606
-0.148823	-0.0689644	-1614
-0.0929706	-0.0741484	-1618
0.0275969	-0.00365195	-1612
0.040676	-0.0583783	-1642
0.12445	-0.025458	-1612
0.252309	-0.0781768	-1612
0.312878	-0.0763145	-1614
0.219386	-0.0368629	-1616
0.262648	-0.228019	-1622
0.327423	-0.0669898	-1624
0.287357	-0.063153	-1622
0.224624	-0.0286741	-1628
0.336439	-0.0190786	-1630
0.340354	-0.0878449	-1630
0.253726	-0.0150569	-1640
0.298602	-0.0344591	-1642
0.27872	-0.177195	-1640
0.213335	0.0779457	-1606
0.106484	0.144401	-1608
0.277638	0.162442	-1612
0.297334	0.131748	-1620
0.1645	0.0949969	-1616
0.237874	0.248907	-1624
0.241915	0.144196	-1622
0.0798531	0.11889	-1626
0.0993565	0.20725	-1626
0.216196	0.163605	-1626
0.230313	0.140366	-1630
0.193722	0.129489	-1630
0.150904	0.310112	-1632
0.16702	0.143899	-1640
0.119947	0.0925072	-1642
0.212731	0.215346	-1642
0.275705	0.242891	-1642
-0.121521	-0.0817967	-1414
0.118193	0.275257	-1408
0.112069	0.0795561	-1420
0.173279	0.0988817	-1420
0.20586	0.180837	-1420
0.0639528	0.181709	-1432
0.194041	0.215179	-1436
0.220261	0.149787	-1440
0.200326	0.159938	-1438
0.0699724	0.188623	-1438
0.0910817	0.225727	-1442
0.226356	0.158465	-1426
0.257924	-0.0363445	-1410
0.312205	-0.0262786	-1412
0.2764	0.0167744	-1414
0.299598	-0.0599662	-1418
0.208667	-0.00601446	-1420
0.259788	0.018506	-1418
0.146781	-0.0304292	-1422
0.143047	0.0418765	-1430
0.303829	-0.00711821	-1430
0.265593	0.0414403	-1426
0.265205	-0.0769322	-1428
0.233759	0.00393914	-1430
0.278009	0.0212092	-1432
0.200008	0.0406934	-1436
0.219369	0.0535485	-1444
0.272203	0.0331258	-1444
0.244652	0.0183937	-1444
0.195412	-0.0317511	-1410
0.302498	-0.135021	-1434
0.0147257	-0.0667705	-1184
-0.0555839	-0.0516084	-1178
-0.113762	-0.171219	-1174
-0.0969119	-0.204416	-1168
-0.250512	-0.169753	-1168
-0.0650811	-0.148612	-1178
0.225954	0.0579952	-1200
0.25996	0.156216	-1200
0.117651	0.201135	-1198
0.143653	0.205247	-1200
0.157444	0.0513061	-1202
0.0660958	0.168188	-1196
0.152041	0.120405	-1194
0.129807	0.073966	-1190
0.0746583	0.080829	-1184
0.1888	0.123987	-1184
0.20758	0.177833	-1194
0.279304	0.223191	-1196
0.2915	0.0467333	-1190
0.233387	0.0509055	-1192
0.22299	0.19521	-1176
0.261134	0.111886	-1176
0.0771376	0.136232	-1174
0.0940977	0.143359	-1170
0.0960971	0.199639	-1172
0.335213	-0.0766417	-1198
0.318133	-0.139096	-1196
0.173235	-0.100783	-1198
0.248728	-0.0970114	-1192
0.221101	0.00150411	-1188
0.157524	-0.0464309	-1186
0.328635	-0.11528	-1186
0.182372	-0.00432338	-1180
0.129113	-0.0759841	-1178
0.289906	-0.0039379	-1178
0.319002	0.0129021	-1178
0.298463	-0.0413517	-1172
0.325696	-0.173169	-1170
0.341116	-0.15645	-1174
0.365124	-0.26879	-1194
0.362475	-0.307292	-1198
0.349154	-0.272138	-1172
0.218182	-0.238693	-1166
0.245804	-0.317292	-1166
-0.115221	-0.135556	-932
-0.0619261	-0.129415	-940
-0.228006	-0.0465054	-938
-0.204049	-0.171399	-950
-0.137282	-0.222538	-946
-0.0990434	-0.133495	-952
-0.183566	-0.169197	-960
-0.10862	-0.13137	-962
0.00848083	-0.0465124	-958
-0.0833178	-0.137967	-960
0.0890565	0.194616	-960
0.1019	0.171777	-960
0.31378	0.12286	-956
0.174659	0.11592	-954
0.268353	0.187249	-950
0.269553	0.213817	-952
0.257437	0.257273	-956
0.127358	0.106435	-950
0.114561	0.138465	-958
0.182221	0.141073	-950
0.23161	0.170242	-948
0.161603	0.140379	-940
0.229465	0.246505	-938
0.117215	0.120315	-938
0.125213	0.139727	-940
0.165098	0.185012	-942
0.208178	0.136341	-940
0.231823	0.142334	-942
0.225581	0.130852	-942
0.239291	0.149106	-940
0.0662263	0.0916018	-940
0.263274	0.17395	-934
0.217469	0.131441	-934
0.0827413	0.195633	-930
0.0930086	0.0733053	-930
0.154052	0.251251	-930
0.118981	0.412366	-934
0.31847	0.194062	-934
0.252586	0.256544	-932
0.118316	0.111812	-942
0.269886	0.15632	-946
0.279737	0.149464	-944
0.261155	0.14258	-938
0.0927853	0.0211006	-928
0.243919	-0.0962285	-928
0.322599	0.0286856	-930
0.296844	0.0961444	-928
0.226277	0.0739222	-932
0.160383	0.01932	-930
0.136213	-0.0100175	-930
0.280958	0.023463	-936
0.306265	0.0816264	-938
0.100046	-0.00114967	-940
0.103972	0.0549246	-942
0.199847	0.00564318	-950
0.257349	-0.0139502	-950
0.25913	-0.063428	-952
0.124444	0.0433368	-954
0.0807886	0.025496	-950
0.296362	0.0228251	-948
0.246624	0.0764248	-946
0.268665	0.0376306	-956
0.179972	0.0370698	-956
0.302485	0.088279	-958
0.281773	-0.173754	-946
0.177578	-0.192394	-946
0.197084	-0.199916	-946
0.31994	-0.202923	-950
0.229777	-0.192723	-956
0.289428	-0.111861	-958
0.164631	-0.242902	-960
0.350804	-0.159706	-920
0.212784	-0.0931581	-932
-0.0802826	-0.134581	-714
-0.12265	-0.158705	-710
-0.154401	-0.144983	-700
-0.0440371	-0.104055	-702
-0.110524	-0.144444	-694
-0.143181	-0.207978	-716
-0.0875789	-0.180606	-716
-0.158047	-0.185431	-714
0.0740287	0.16719	-690
0.0803958	0.182456	-694
0.0820135	0.131993	-696
0.0654212	0.126376	-696
0.257468	0.202887	-698
0.222345	0.136644	-700
0.107119	0.104262	-688
0.236452	0.205143	-690
0.180935	0.0655704	-690
0.191161	0.111622	-692
0.262355	0.0786073	-692
0.222619	0.0955705	-698
0.246017	0.0801645	-700
0.267406	0.106844	-702
0.213205	0.173805	-706
0.246258	0.147505	-708
0.26959	0.0895013	-708
0.207423	0.16337	-710
0.0866545	0.18788	-698
0.257572	0.176986	-702
0.0712979	0.0951246	-706
0.0604548	0.128532	-714
0.127461	0.182649	-716
0.085848	0.087425	-716
0.0891683	0.0645455	-716
0.232604	0.122237	-714
0.212889	0.119861	-714
0.305651	0.177878	-714
0.196485	0.158645	-720
0.205984	0.182576	-722
0.233651	0.118477	-722
0.203956	0.0852688	-720
0.247257	-0.100661	-692
0.258723	-0.0280037	-690
0.131342	-0.090992	-696
0.144553	-0.107044	-700
0.253634	-0.0282632	-698
0.166706	-0.0545899	-708
0.224699	0.0215817	-708
0.251917	-0.00324092	-712
0.155094	-0.0131633	-714
0.19349	-0.0897076	-710
0.243579	-0.0348648	-716
0.203102	0.0254016	-722
0.142251	-0.0189464	-722
0.18102	-0.226944	-698
0.209743	-0.21627	-710
0.241796	-0.248093	-716
0.22011	-0.234564	-716
0.281145	-0.0521342	-720
0.28762	-0.0583432	-714
0.302496	-0.0662093	-714
-0.170135	0.025182	-694
0.26501	0.00137756	-718
0.277589	0.00796587	-714
0.305684	0.0172361	-718
-0.12504	0.347986	-478
-0.0724313	-0.122745	-450
-0.0725495	-0.0528408	-450
-0.0334441	-0.101207	-452
0.0699888	0.0252359	-452
-0.273785	-0.00290196	-448
0.00365087	-0.0541437	-468
-0.121584	-0.137129	-470
-0.110837	-0.146888	-482
0.30729	0.131187	-450
0.106801	0.174032	-452
0.0850396	0.116315	-452
0.154735	0.163688	-454
0.251597	0.143828	-456
0.0928607	0.197116	-452
0.231244	0.163287	-454
0.204536	0.143032	-456
0.156622	0.212324	-458
0.103443	0.187404	-456
0.258672	0.162017	-460
0.113141	0.180507	-468
0.221089	0.20652	-468
0.23164	0.172394	-468
0.277446	0.234421	-472
0.292744	0.137116	-476
0.32464	0.178349	-472
0.203235	0.120909	-472
0.0646565	0.18849	-472
0.0753983	0.172032	-472
0.110148	0.195452	-478
0.143073	0.184791	-476
0.196648	0.141946	-480
0.230879	0.144578	-484
0.221824	0.149941	-480
0.19725	0.193392	-482
0.124361	0.331818	-474
0.215026	0.239527	-476
0.238453	0.141755	-484
0.109588	0.125061	-482
0.185685	0.218904	-482
0.239862	0.202058	-460
0.170331	0.122225	-478
0.379048	0.171078	-454
0.282177	0.0335667	-448
0.11926	0.0855718	-450
0.214569	0.0741942	-452
0.210923	0.0569996	-452
0.180189	-0.0153916	-454
0.206429	-0.0467539	-458
0.146976	0.0817025	-454
0.13554	-0.0144111	-462
0.128053	0.0893753	-468
0.19455	0.0793533	-464
0.167138	0.0866904	-468
0.230627	0.0567759	-466
0.281971	0.0422134	-468
0.107613	0.0959952	-484
0.135535	0.0508535	-482
0.143371	0.0788466	-480
0.257767	0.101589	-480
0.27252	0.0742271	-478
0.225722	0.0518866	-476
0.241636	0.0406407	-478
0.20957	0.0243146	-476
0.168274	0.0387784	-476
0.323035	0.0781688	-476
0.277286	-0.0694629	-480
0.268828	0.0345275	-484
0.265933	-0.0145296	-484
0.352613	-0.00398773	-476
0.298102	-0.0595067	-472
0.216363	0.0394101	-472
0.300415	0.0627048	-468
0.284439	-0.0291381	-464
0.254317	-0.0295658	-462
0.250949	0.0877236	-464
0.134038	0.0896056	-458
0.208989	0.105872	-454
0.123117	0.110196	-478
0.261526	-0.0240909	-466
0.312988	-0.204987	-454
0.29263	-0.245562	-456
0.259726	-0.19711	-460
0.306874	-0.25609	-466
0.219999	-0.216845	-468
0.249997	-0.114782	-476
0.239451	-0.166353	-478
-0.11066	-0.144849	-234
0.179509	-0.19073	-208
0.211105	-0.185031	-206
0.223405	-0.0760172	-210
0.199567	-0.120375	-210
0.189478	-0.217731	-210
0.211689	-0.239836	-212
0.263546	-0.239784	-210
0.192138	-0.165579	-214
0.257724	-0.178508	-228
0.171153	-0.146105	-230
0.192925	-0.0721907	-230
0.203651	-0.191882	-238
0.294862	-0.226224	-234
0.347592	-0.107543	-216
0.170332	0.0154917	-214
0.151409	-0.00472553	-212
0.189459	0.0643965	-216
0.220017	0.0504503	-218
0.144587	-0.0481915	-220
0.159456	0.055681	-224
0.2626	0.0525455	-228
0.171245	0.0643891	-230
0.249218	0.0412444	-230
0.200427	-0.0095328	-244
0.186528	0.0743677	-244
0.165959	0.0671977	-244
0.134884	0.0557182	-256
0.239351	-0.0554953	-232
0.255156	0.0131587	-212
0.0496119	0.0172675	-260
0.0499498	0.0459996	-254
0.0681687	0.0180328	-248
0.0683618	0.0736693	-240
0.11906	0.05074	-234
0.226418	0.0800369	-212
0.215286	0.220815	-230
0.227905	0.236187	-228
0.0889219	0.106072	-236
0.131148	0.18888	-238
0.198959	0.0887226	-236
0.222498	0.127931	-240
0.255344	0.133221	-242
0.221368	0.16396	-244
0.204303	0.134611	-246
0.200625	0.116028	-252
0.157974	0.179957	-254
0.0991368	0.106711	-264
0.108903	0.116058	-262
0.129029	0.211133	-256
0.0508284	0.125487	-252
0.10268	0.177029	-248
0.247625	0.216921	-248
0.259945	0.236886	-250
0.263348	0.22187	-252
0.196473	0.231128	-246
0.111321	0.223608	-254
0.171216	0.193621	-256
0.189888	0.144641	-260
0.151322	0.119335	-264
0.204076	0.115033	-264
0.228218	0.146016	-264
0.281996	0.165394	-258
0.248368	0.0704298	-266
0.200195	0.0821841	-264
0.219008	0.0728445	-234
0.11822	0.240816	-250
-0.059822	-0.0244004	-256
-0.198259	0.134633	-234
-0.136863	-0.0870063	-260
0.156675	0.369476	-240
0.213905	-0.294707	-208
-0.147189	-0.108323	-240
0.0913019	0.173336	-232
0.187524	-0.00815738	28
-0.0552362	-0.135661	22
-0.161301	-0.221538	26
0.103322	-0.0001256	8
0.0363678	0.0109999	6
0.107415	-0.0223303	4
0.139148	-0.0175377	2
0.155394	-0.0303952	0
-0.0771237	-0.102073	4
-0.131837	-0.133638	4
-0.147295	-0.200781	-2
-0.137779	-0.145491	0
-0.0470599	-0.116319	8
-0.112321	-0.105881	12
-0.0979177	-0.104572	6
-0.129181	-0.165323	4
0.227984	0.0750096	32
0.160875	0.0554557	30
0.127323	0.222913	32
0.0860064	0.217288	30
0.0827552	0.200001	28
0.276583	0.24917	28
0.252958	0.13662	26
0.229533	0.139323	24
0.224932	0.206123	24
0.179792	0.137102	26
0.280211	0.0738594	30
0.216997	0.0368338	28
0.222682	0.12484	30
0.246659	0.217294	32
0.186832	0.131893	32
0.180049	0.0937108	30
0.109587	0.094114	28
0.138049	0.103243	24
0.192449	0.0514894	22
0.17972	0.0647501	22
0.229639	0.0929439	24
0.229083	0.0640824	22
0.0923055	0.0794519	22
0.0714341	0.328364	20
0.207539	0.0846279	14
0.224307	0.114038	12
0.272601	0.105008	14
0.310991	0.11655	18
0.284895	0.172078	16
0.118586	0.208853	14
0.22587	0.0274998	16
0.145645	0.0788635	20
0.179086	0.129275	20
0.28578	0.115578	22
0.225062	0.29705	18
0.213441	0.161046	6
0.235077	0.139786	4
0.246219	0.147798	4
0.247414	0.175053	8
0.233858	0.113562	4
0.10874	0.137076	4
0.140217	0.157833	0
0.137648	0.18255	-2
0.0521786	0.110211	0
0.309032	0.0537501	4
0.2943	0.0691791	4
0.12683	0.0834248	4
0.108058	0.0893214	10
0.141165	0.19195	-2
0.251168	0.0128773	6
0.267777	-0.153424	30
0.182226	0.0226939	-2
0.206721	0.0275923	-2
0.165583	0.0167709	2
0.259896	-0.00789296	4
0.222208	-0.0300647	6
0.266229	-0.0987149	8
0.250873	-0.117799	10
0.230452	0.00347052	24
0.168355	0.0396036	28
0.269771	0.0368206	28
0.231661	-0.157397	4
0.413616	-0.0137763	0
0.29265	-0.207828	24
0.256273	-0.207299	28
0.209692	-0.277827	8
0.216121	-0.168542	0
-0.242985	0.0400379	244
-0.182037	0.12586	238
-0.131912	0.0260842	248
-0.141622	-0.184174	232
-0.122767	-0.129822	228
-0.129754	-0.131478	224
0.106357	0.206986	252
0.125645	0.210304	252
0.142423	0.225971	252
0.291046	0.16383	250
0.256671	0.158631	248
0.243413	0.155958	250
0.238268	0.145418	252
0.228926	0.155462	252
0.201957	0.15588	250
0.179234	0.253221	250
0.24926	0.254007	244
0.0940928	0.180663	242
0.112896	0.368336	244
0.233731	0.15856	240
0.27711	0.169673	242
0.107831	0.198753	234
0.230975	0.176128	232
0.29058	0.171251	230
0.263267	0.164513	228
0.185896	0.17627	220
0.205731	0.161988	222
0.260742	0.178235	222
0.205458	0.294889	230
0.098743	0.152936	228
0.200021	0.138912	252
0.169783	0.0138248	248
0.183842	0.0665602	248
0.129617	0.0292409	250
0.20558	0.0755727	242
0.21432	0.101741	242
0.247512	0.0230178	240
0.113038	0.126917	240
0.19105	0.000347875	238
0.176671	0.0275079	236
0.123115	0.0282552	234
0.175314	0.0541913	234
0.196167	0.112596	234
0.178923	0.0911884	236
0.159761	0.085558	228
0.181877	0.128405	230
0.211757	0.136644	232
0.223997	0.0925413	228
0.208775	0.123245	224
0.154531	0.0282874	224
0.124614	0.00379442	224
0.128538	-0.0382083	226
0.209373	0.029563	230
0.203498	0.0109967	230
0.243753	0.0247378	232
0.160996	0.013915	220
0.166602	0.125055	222
0.277228	0.0162664	252
0.305463	0.00132064	248
0.275979	-0.0449919	246
0.374293	0.00156544	238
0.289873	0.154579	234
0.288573	0.00398124	230
0.256596	0.0742778	226
0.271263	0.0824529	230
0.273619	0.0549192	222
0.248968	0.0105393	220
0.254697	0.0933401	220
0.246334	0.072532	242
0.258627	0.110631	244
0.284959	0.139395	242
0.263795	0.142784	248
0.293421	0.123618	242
0.262457	-0.0332672	218
0.172986	-0.0566972	252
0.153632	-0.148382	252
0.207196	-0.124063	252
0.173707	-0.145431	244
0.265162	-0.134776	240
0.337751	-0.0674492	238
0.230787	-0.0770157	236
0.290142	-0.0496238	232
0.248092	-0.120462	230
0.242396	-0.134454	228
0.242391	-0.0745226	224
0.286688	-0.1318	222
0.192497	-0.222627	224
0.236243	-0.0626949	244
0.234584	-0.306098	242
0.226763	-0.148272	238
-0.122153	0.0373984	506
-0.253175	-0.154681	494
-0.112443	-0.114925	486
-0.163286	-0.143948	486
-0.2141	-0.0783699	484
-0.124057	-0.0337256	476
-0.150247	0.0402077	478
0.203432	0.170076	512
0.225708	0.0653525	508
0.0713095	0.143888	498
0.16273	0.0696164	496
0.246156	0.0427714	494
0.251177	0.0682084	488
0.0810725	0.111166	488
0.184563	0.143782	482
0.0836862	0.29305	494
0.30519	0.063028	486
0.285853	0.00301525	512
0.308619	-0.00714627	512
0.179684	-0.00715956	504
0.177384	0.0120278	502
0.244341	-0.112846	504
0.300465	-0.0545933	504
0.289253	-0.0788813	500
0.348056	-0.0658506	492
0.251254	-0.0211267	506
0.350013	-0.0623705	506
0.109924	-0.00815578	504
0.30872	-0.0901852	496
0.203107	-0.0953722	486
0.339771	-0.022714	484
0.299915	-0.0956511	480
-0.11822	-0.150368	752
-0.171884	-0.198942	754
-0.132444	-0.151428	748
-0.226753	-0.0610671	736
-0.081626	-0.160039	730
-0.151694	-0.186549	726
-0.170297	-0.164695	728
0.191104	0.329118	742
0.261152	0.430948	726
0.217394	0.169655	752
0.233385	0.104831	752
0.23631	0.0852955	752
0.112712	0.181472	754
0.147311	0.145321	754
0.142743	0.155352	752
0.10918	0.237263	750
0.122434	0.222253	750
0.15143	0.202365	750
0.186183	0.145048	754
0.310971	0.125457	754
0.255709	0.163833	748
0.357839	0.206252	744
0.240798	0.162184	744
0.251311	0.16728	742
0.212817	0.112841	746
0.196691	0.127863	746
0.178571	0.139394	742
0.0841634	0.126846	742
0.132589	0.140386	738
0.127225	0.100553	738
0.0780437	0.215136	736
0.177108	0.0784635	736
0.313956	0.101254	734
0.215051	0.235186	728
0.130161	0.15529	730
0.190248	0.158353	728
0.211473	0.157832	726
0.200866	0.135674	724
0.161968	0.125215	724
0.119314	0.0888232	722
0.246764	0.128625	722
0.105468	0.195656	724
0.242515	0.0960458	720
0.129683	0.237777	728
0.0988208	0.218428	742
0.234454	0.179754	744
0.0306831	0.0682773	742
0.19083	0.182067	744
0.295482	0.122382	746
0.300955	0.152872	750
0.221946	0.152469	738
0.315677	0.150374	742
0.18494	0.063392	752
0.251356	0.0273903	754
0.174845	0.0605773	748
0.276014	0.0542908	746
0.227006	0.0104775	744
0.185288	0.0117112	744
0.156615	-0.0366155	742
0.0756058	0.0367704	744
0.199736	0.0734045	746
0.193034	0.0616933	748
0.213443	-0.0101365	734
0.238181	0.0205334	734
0.206966	0.0328894	734
0.264978	0.0241293	736
0.251366	0.0755248	736
0.224588	-0.050478	732
0.177805	0.0258776	728
0.217762	0.000979553	726
0.211428	0.0161874	728
0.293129	-0.000161192	724
0.207781	-0.0367952	720
0.267381	-0.046907	720
0.27365	-0.0279049	722
0.21211	0.0403229	728
0.316304	0.00595172	754
0.301259	0.0228955	720
0.308145	0.0364419	726
0.315961	0.0173778	730
0.411354	0.0238751	736
0.338231	0.0533795	736
0.294144	0.066808	742
0.388805	-0.00174212	748
0.325474	0.0655309	752
0.295676	-0.046349	728
0.269551	-0.0370928	744
0.401896	-0.105302	734
0.316513	-0.261311	746
0.145619	-0.177138	720
0.164804	-0.227052	720
-0.184402	-0.127283	990
-0.184094	-0.0218174	988
-0.265098	0.100584	990
-0.0878805	-0.0482682	984
-0.211713	-0.111767	976
-0.136298	-0.152327	972
-0.156777	-0.0563829	970
-0.0999821	-0.00629447	968
-0.161436	-0.133279	968
-0.144054	-0.153384	962
0.283241	0.0748145	992
0.246366	0.316277	994
0.0759358	0.153053	992
0.148131	0.0923932	984
0.107906	0.191736	978
0.135755	0.151882	976
0.19815	0.172395	978
0.220326	0.225144	972
0.117706	0.151589	970
0.164891	0.172102	970
0.0916605	0.256495	978
0.0749054	0.118475	966
0.195574	0.157744	964
0.225226	0.135474	964
0.259778	0.0718804	964
0.102748	0.1595	960
0.321904	-0.0977011	984
0.289973	-0.0715049	988
0.256653	-0.177225	978
0.224996	0.0556765	972
0.19806	0.0402108	976
0.309965	-0.0238541	968
0.278868	0.0458879	964
0.154464	0.0200099	962
-0.247221	-0.0888135	1216
-0.169147	-0.0111161	1212
-0.188445	-0.160465	1202
0.0551421	0.233113	1216
0.148995	0.187592	1216
0.225844	0.210853	1210
0.170372	0.15618	1210
0.161409	0.0574962	1214
0.351941	-0.107349	1210
0.258539	-0.0511664	1202
0.372066	-0.026118	1204
0.258922	-0.111682	1230
-0.289001	0.197516	1470
-0.144317	0.276119	1464
-0.252214	-0.159223	1470
-0.100265	-0.0699953	1458
-0.215285	-0.0138502	1460
-0.215981	-0.0239658	1460
-0.231208	-0.160585	1456
-0.279634	-0.00328282	1452
-0.259984	-0.0163059	1446
-0.0585143	-0.100444	1476
0.212952	0.216093	1472
0.19584	0.094661	1472
0.176153	0.171037	1462
0.237192	0.102874	1462
0.147098	0.171807	1456
0.148684	0.0920652	1456
0.107972	0.193101	1450
-0.285203	-0.19175	1692
0.220422	0.155513	1712
0.296543	0.0587789	1716
0.34643	-0.0820114	1702
-0.134494	-0.0976838	1954
-0.214151	-0.251717	1930
-0.148872	-0.0790017	1924
0.117584	0.270069	1940
0.396877	-0.0213589	1952
0.39032	-0.037784	1934
0.318374	-0.146546	1924
0.379234	-0.0856695	1918

## Sheet: Sheet2
0.299028	-0.140495	-216
0.304801	-0.126958	-208
0.314731	-0.121326	-222
0.304304	-0.0988052	-224
0.344509	-0.127391	18
0.263118	-0.18678	4
0.14165	-0.223309	-944
0.324223	-0.0125094	-456
0.355235	-0.0575326	-464
0.315076	-0.00965348	-466
0.341953	-0.0513733	-470
0.365144	-0.0193201	-474
0.301084	0.0263941	-478
0.351461	-0.197801	-456
0.297855	-0.121898	-236
0.328941	-0.048432	240
0.373356	-0.0504097	226
0.349732	-0.201375	248
0.339678	-0.275369	244
0.317892	-0.27669	226
0.343326	-0.0128024	748
0.267203	-0.0705566	970
