# Supplementary material for: Spinal premotor interneurons controlling antagonistic muscles are spatially intermingled
Source: eLife. 2022 Dec 13;11:e81976. doi: 10.7554/eLife.81976 (PMC9844990; doi:10.7554/eLife.81976)
Supplement: Figure 12—figure supplement 3—source data 1. — The x-y coordinates are normalized (between –0.5 and 0.5) and scaled to an idealized spinal cord of dimensions 1700 μm and 900 μm in the mediolateral and dorsoventral directions respectively, while z coordinates are in micron, with the axis origin taken at the border between L4 and L5 and negative values in the rostral direction. [file elife-81976-fig12-figsupp3-data1.xlsx]

## Sheet: Sheet1
-0.191925	-0.00150175	-2807.05
-0.194045	-0.150467	-2807.23
-0.0628947	-0.182415	-2809.8
0.252359	0.0985867	-2808.85
0.351751	-0.14919	-2724.73
0.259588	0.0904748	-2722.75
0.211652	0.339387	-2720.25
-0.115066	-0.168087	-2635.06
-0.0900786	-0.103586	-2639.94
-0.183768	-0.0951375	-2645.79
-0.0814521	0.0923446	-2657.84
-0.0897866	0.136442	-2656.16
0.0640799	0.104914	-2644.45
0.260787	0.218988	-2641.5
-0.0518958	0.183096	-2657.59
0.190371	0.169842	-2644.73
0.231011	0.268269	-2646.84
-0.181718	-0.349054	-2546.27
0.14769	0.103638	-2563.84
0.353566	-0.156967	-2592.4
-0.112998	-0.168482	-2459.03
-0.0871767	-0.126616	-2460.52
0.323018	-0.303293	-2516.61
0.174796	0.119329	-2487.73
0.263454	-0.376105	-2377.45
0.301378	-0.191714	-2369.52
0.320662	0.00396084	-2376.93
0.19981	0.0860098	-2388.12
0.183945	0.110415	-2400.65
0.128641	0.0770899	-2403.95
0.228244	0.0728401	-2384.99
0.342529	0.0629444	-2377.79
0.368796	0.0718915	-2372.57
0.370664	0.080138	-2376.12
0.358072	0.0706771	-2373.46
0.3298	0.166577	-2380.47
0.199084	0.258784	-2396.33
-0.191159	-0.315009	-2294.21
-0.110292	-0.272809	-2297.67
-0.215217	-0.245173	-2304.47
0.179271	0.0666865	-2326.86
0.296123	0.0792056	-2344.26
0.37225	-0.197065	-2307.89
-0.212273	-0.128007	-2219.6
-0.206967	-0.250351	-2227.19
-0.168003	-0.227323	-2235.18
-0.0736429	0.121607	-2235.68
0.188464	0.11399	-2264.25
0.205587	0.111894	-2269.68
0.164038	0.138334	-2261.2
0.280998	0.086234	-2278.95
0.364094	0.122341	-2292.29
0.169173	0.0271552	-2262.19
0.136973	0.0368252	-2264.89
0.232136	-0.0203018	-2273.32
0.327249	-0.0102501	-2284.89
0.226053	-0.345345	-2273.25
0.33737	-0.32649	-2290.11
0.289855	0.167554	-2279.76
0.271165	0.181339	-2277.44
0.190262	0.0748596	-2274.59
0.283795	-0.152763	-2131.87
0.269781	-0.338868	-2131.06
0.183311	0.109743	-2136.39
0.319388	0.127205	-2121.05
0.29391	0.105254	-2132.18
0.354529	0.0548889	-2131.04
0.203254	0.0791983	-2129.93
0.14757	0.0996887	-2135.85
0.13665	0.101569	-2133.33
0.10644	0.240241	-2143.54
0.212062	0.244529	-2135.42
-0.156978	-0.284168	-2164.93
0.00375246	-0.0550928	-2081.94
0.132434	0.117872	-2082.27
0.0472007	0.0864215	-2081.05
0.32892	0.204013	-2084.89
-0.164199	-0.257499	-1999.63
-0.145131	-0.280591	-2000.01
-0.00890553	0.0961017	-2004.4
0.211861	0.182467	-2003.13
0.218098	0.186327	-2004.52
0.293155	0.241133	-2004.46
0.269759	0.0277084	-2004.9
0.225472	0.010153	-2004.69
0.265062	-0.381531	-2004.31
0.244056	-0.338551	-2006.05
0.225838	-0.127048	-2008.85
0.288526	0.123822	-2008.5
-0.212406	-0.264266	-1935.22
-0.152361	-0.163156	-1928.19
-0.00128414	-0.121225	-1925.63
0.216253	-0.123793	-1926.45
0.28985	-0.371127	-1931.17
0.22648	0.00137851	-1919.56
0.413165	0.0796411	-1916.98
0.154683	0.144777	-1912.21
0.203104	0.162976	-1910.93
0.238686	0.228371	-1907.17
0.278209	0.230376	-1906.83
0.307698	0.215548	-1907.46
0.320632	0.228796	-1909.45
0.163583	0.0931919	-1914.95
0.317641	-0.144112	-1859.13
0.328684	-0.120683	-1859.32
0.339379	-0.252817	-1864.63
0.302122	-0.316259	-1860.98
0.190358	0.0407807	-1849.81
0.166581	0.109117	-1852.69
0.142571	0.15623	-1844.91
0.183917	0.194451	-1846.09
0.256144	0.140459	-1853.6
0.04996	0.0448964	-1842.84
-0.132444	-0.242181	-1838.79
-0.164519	-0.36875	-1842.09
-0.092455	-0.218817	-1768.36
0.0839179	0.0766603	-1767.1
0.0920223	0.213075	-1764.85
0.0463668	0.207025	-1771.29
0.0911349	0.179643	-1768.16
0.112242	0.187917	-1762.11
0.119189	0.109902	-1763.2
0.177751	0.0559498	-1765.8
0.216687	0.00628405	-1768.67
0.334777	0.0258378	-1763.55
0.381287	0.145293	-1766.46
0.237645	0.214374	-1759.54
0.161495	-0.373956	-1767.91
0.215434	-0.374445	-1769.76
0.14158	0.277138	-1663.57
0.190449	0.291423	-1662.24
0.294347	0.277833	-1662.03
0.273487	0.231975	-1667.74
0.251057	0.200749	-1672.59
0.193193	0.216554	-1675
0.238994	0.151511	-1675.63
0.263389	0.114684	-1674.79
0.228629	0.0703847	-1677.76
0.203155	0.0554766	-1678.89
-0.108956	0.0169902	-1684.34
-0.152946	-0.221763	-1701.88
0.297195	-0.325327	-1612.19
0.230963	-0.381248	-1615.19
0.332732	-0.370535	-1616.52
0.270038	-0.296526	-1611.24
0.180438	-0.00384379	-1599.79
0.185352	0.0778026	-1594.99
0.247416	0.0139384	-1598.15
0.31196	0.0487365	-1595.46
0.310744	0.114571	-1591.59
0.339349	0.157853	-1588.76
0.2722	0.171569	-1591.39
0.24726	0.192013	-1587.65
0.248264	0.300383	-1581.24
0.10778	0.186504	-1589.33
0.236271	0.100623	-1593.14
0.219778	0.151933	-1590.28
-0.131253	-0.235301	-1614.36
-0.152663	-0.185135	-1614.84
-0.179139	-0.100694	-1608.09
-0.104721	-0.231343	-1613.91
-0.175456	-0.245217	-1515.83
-0.139693	-0.153339	-1517.48
-0.12167	-0.252845	-1516.51
-0.0911648	-0.221556	-1517.34
0.235635	-0.0116895	-1524.91
0.223932	-0.303637	-1521.81
0.123304	0.107811	-1524.79
0.192363	0.206554	-1527.22
0.206634	0.167819	-1526.9
0.245112	0.17606	-1527.61
0.249212	0.102328	-1526.65
0.33294	0.0767157	-1527.59
0.348217	0.124931	-1528.5
0.22634	0.172602	-1527.27
0.0596336	-0.333899	-1518.98
-0.00250526	-0.100792	-1404.98
0.155445	0.0617962	-1422.59
0.194376	0.0288473	-1409.17
0.198465	0.0529588	-1412.65
0.20396	0.15685	-1439.17
0.143715	0.19668	-1469.66
0.263321	0.165287	-1431.48
0.279649	0.179609	-1435.72
0.288117	0.207301	-1439.5
0.324884	0.228597	-1439.42
0.241782	0.0653973	-1403.17
0.240003	0.0257951	-1403.33
0.234052	-0.221649	-1342.29
0.237113	-0.359401	-1308.56
0.40059	0.0404662	-1377.29
0.298322	0.123673	-1410.5
0.261278	0.0189402	-1383.42
-0.0636811	0.0296353	-1339.53
0.182357	0.0787353	-1374.45
0.210785	0.0715806	-1383.03
0.225895	0.0536346	-1380.38
0.22486	0.0238552	-1377.21
0.234938	0.125977	-1391.72
0.1584	0.0365887	-1375.42
0.202487	-0.037926	-1368.9
0.146274	-0.0214189	-1365.64
0.135422	0.00664779	-1366.57
0.101977	0.110162	-1375.54
0.103946	0.209807	-1383.15
0.0624091	0.152506	-1374.69
0.228621	0.214437	-1397.11
0.332978	0.00313848	-1386.42
0.321695	-0.0617313	-1385.4
0.400784	-0.0138776	-1399.46
0.37606	0.176798	-1412.53
0.242212	-0.187193	-1368.04
0.22869	-0.233884	-1362.63
0.328337	-0.229855	-1373.16
0.050663	0.0281152	-1279.14
0.0788036	0.141514	-1301.82
0.161147	0.114933	-1306.21
0.1768	0.044447	-1293.98
0.190219	0.0528902	-1297.26
0.221159	0.0390779	-1302.14
0.225679	0.0610911	-1303.61
0.232033	0.0473159	-1299.42
0.234982	0.0996749	-1308.48
0.251901	0.109256	-1315.25
0.251325	0.144589	-1323.8
0.245299	0.172864	-1330.43
0.237763	0.229511	-1338.72
0.148493	0.220474	-1324.66
0.118634	0.189334	-1318.12
0.412428	-0.1036	-1309.13
0.357323	-0.300578	-1275.73
0.333333	-0.0360956	-1309.59
-0.160898	-0.194698	-1228.56
0.13668	0.277999	-1172.25
0.118162	0.232886	-1176.57
0.188607	0.284084	-1164.29
0.221018	0.212601	-1174.44
0.260974	0.199048	-1174.08
0.36225	0.149271	-1177.17
0.31275	0.10308	-1179.93
0.308736	0.115445	-1179.08
0.207747	0.154245	-1179.65
0.203522	0.0443882	-1188.68
0.194071	0.0246098	-1196.19
0.152411	0.0642272	-1188.95
0.116661	0.0697572	-1198.17
0.250391	-0.0609726	-1194.37
0.240162	-0.166285	-1204.12
0.228889	-0.238102	-1211.82
0.257045	-0.296432	-1208.87
0.359045	0.0122065	-1191.15
0.282648	0.0318973	-1186.79
0.258947	0.0599274	-1185.39
0.0280856	-0.016361	-1202.5
-0.178845	-0.204747	-1129.46
-0.149678	-0.202932	-1135.24
-0.0912726	-0.252262	-1133.92
-0.00194766	-0.065381	-1126.17
0.0319353	0.00176987	-1125.15
0.172102	0.0899297	-1136.56
0.224225	0.0696961	-1134.09
0.211413	0.0925802	-1137.76
0.199733	0.0522444	-1133.86
0.189046	0.0252258	-1139.25
0.136137	0.1608	-1133.04
0.079968	0.231566	-1128.87
0.121583	0.245901	-1124.91
0.212554	0.251454	-1127.72
0.236145	0.253431	-1128.43
0.24497	0.237774	-1129.23
0.237607	0.223609	-1119.75
0.29296	0.285767	-1129.23
0.319345	0.197759	-1128.14
0.308869	0.154277	-1134.08
0.257391	0.14336	-1123.05
0.256193	0.124284	-1133.34
0.195719	0.143924	-1125.85
0.165662	0.1255	-1130.32
0.259549	0.0418135	-1141.02
0.226293	-0.27784	-1148.5
0.271103	-0.329866	-1146.46
0.24123	-0.322381	-1145.29
0.176069	-0.330058	-1143.35
0.226869	-0.14844	-1140.31
-0.130228	-0.285791	-995.002
-0.100129	-0.185059	-1012.22
-0.0405971	-0.158663	-1013.39
0.0414427	0.0117744	-1035.93
0.110916	0.109732	-1054.93
0.125075	0.175862	-1053
0.114132	0.178393	-1057.57
0.0850798	0.219509	-1060.43
0.110694	0.226363	-1067.38
0.174779	0.163959	-1059.22
0.191842	0.152731	-1063.79
0.201657	0.122938	-1056.26
0.207957	0.188357	-1063.58
0.273856	0.266697	-1075.43
0.279983	0.324004	-1081.87
0.249079	0.298927	-1072.7
0.310072	0.2297	-1073.38
0.256457	0.140495	-1061.02
0.264859	0.0701677	-1049.08
0.228367	0.0487092	-1049.73
0.191907	0.0287255	-1050.54
0.272861	0.0222694	-1054.12
0.357361	0.0490314	-1056.57
0.267957	-0.134376	-1034.84
0.251343	-0.367464	-1013.53
0.155753	0.266641	-1069.19
0.132621	0.0506386	-1044.89
-0.161969	-0.239348	-874.061
-0.120455	-0.279927	-865.972
-0.0933532	-0.183934	-898.281
0.237926	-0.00945159	-969.847
0.361189	-0.00842625	-985.42
0.423176	-0.0897809	-969.533
0.348839	0.116151	-1011.11
0.1206	0.212602	-1015.38
0.103073	0.119075	-997.869
0.18359	0.0798098	-984.909
0.220353	0.104202	-994.105
0.230085	0.0952387	-993.137
0.240424	0.0950767	-993.544
0.259875	0.0707259	-990.135
0.261753	0.183228	-1018.73
0.256739	0.295839	-1047.06
0.216773	0.044047	-980.815
0.194876	0.0163037	-974.179
0.159337	-0.00218551	-963.794
0.179872	-0.0231234	-965.478
0.194353	-0.0275849	-959.884
0.225535	-0.175664	-907.341
0.195282	-0.183712	-902.09
0.259527	-0.359601	-908.677
0.346102	0.0981817	-922.964
0.308524	0.0288882	-921.441
0.282072	0.033508	-916.829
0.311298	0.14388	-916.815
0.275673	0.212387	-910.476
0.298787	0.282058	-909.482
0.22471	0.229434	-901.573
0.184646	0.263141	-899.406
0.113896	0.237043	-882.276
0.0731464	0.1446	-875.375
0.0780219	0.0761108	-876.364
0.111565	0.11261	-886.999
0.10518	0.0915606	-885.931
-0.248629	-0.119857	-824.485
-0.072923	-0.0831396	-801.857
0.0750683	0.19779	-799.287
0.115112	0.168154	-798.65
0.1355	0.145326	-798.33
0.178426	0.134495	-797.636
0.147367	0.165916	-798.125
0.16334	0.14973	-797.874
0.152224	0.115003	-798.075
0.226432	0.0944114	-796.876
0.237922	0.0782743	-796.697
0.260316	0.0761447	-796.333
0.224196	0.138703	-796.887
0.201309	0.00521095	-797.336
0.185337	0.10899	-797.538
0.0862348	0.104804	-717.244
0.108013	0.122338	-715.037
0.12904	0.110283	-720.25
0.143519	0.125424	-717.625
0.174129	0.121668	-720.269
0.23348	0.0871034	-727.154
0.212026	0.158767	-720.852
0.0954676	0.224893	-707.443
0.148639	0.0452959	-723.191
0.255527	0.18504	-722.572
0.247482	0.223725	-719.448
0.291168	0.229161	-722.525
0.301483	0.0949122	-734.773
0.307837	-0.303613	-753.785
0.250617	-0.346597	-751.445
0.226832	-0.300934	-747.295
0.208093	-0.27456	-750.077
0.17252	-0.347829	-753.735
0.284499	-0.0227883	-737.911
-0.113616	-0.267949	-635.141
-0.04233	-0.131971	-637.369
-0.101663	-0.156396	-632.474
0.112612	0.00535979	-642.626
0.0923417	0.0768018	-635.066
0.111062	0.116639	-641.03
0.0487616	0.156038	-633.194
0.0591509	0.0171753	-636.736
0.155341	0.0492396	-645.31
0.19779	0.00541657	-654.078
0.233603	-0.153298	-662.373
0.33746	0.0473315	-663.919
0.308579	0.0976466	-659.07
0.272223	0.110559	-652.095
0.305337	0.160553	-661.924
0.37479	0.222133	-663.871
0.246364	0.208769	-651.306
0.260844	0.31949	-645.794
0.282227	-0.0537524	-658.866
0.399214	-0.252794	-679.329
0.295876	-0.350292	-677.207
-0.142539	-0.220374	-551.044
-0.0866971	-0.193231	-551.223
-0.00355194	-0.0978579	-551.548
-0.0186145	-0.0543523	-546.705
-0.0742824	-0.0303452	-546.581
0.0743813	0.114607	-547.144
0.0905472	0.131394	-552.056
0.101575	0.191248	-552.158
0.089116	0.253121	-542.502
0.073608	0.239837	-552.146
0.0602088	0.0767074	-551.911
0.0608674	0.0465734	-556.726
0.105653	0.018941	-551.956
0.20115	0.102259	-547.452
0.212228	0.131047	-547.516
0.253223	0.122007	-547.61
0.274332	0.118824	-547.66
0.269685	0.156074	-547.694
0.303717	0.152192	-552.626
0.239912	0.202406	-542.825
0.197777	0.213497	-542.731
0.179283	0.265922	-542.748
0.173022	0.209607	-547.513
0.175207	0.302079	-547.632
0.270756	0.285988	-552.706
0.189206	-0.126473	-552.049
0.175996	-0.26137	-551.912
0.210344	-0.292304	-547.125
-0.14759	-0.172001	-467.471
-0.121847	-0.147193	-467.093
-0.107268	-0.217457	-462.012
-0.0821988	-0.0817584	-461.666
0.00152707	-0.0642906	-465.278
0.00197298	-0.125854	-470.111
-0.0247761	0.0344547	-470.537
0.0759526	0.0664857	-464.198
0.200598	0.0106313	-457.485
0.219374	0.0333425	-457.211
0.273675	0.0601105	-456.411
0.305501	0.0834127	-460.793
0.308105	0.095781	-455.907
0.313885	0.118103	-455.826
0.267531	0.126943	-456.516
0.264153	0.17145	-461.426
0.28934	0.191697	-456.207
0.290305	0.228174	-456.2
0.283866	0.311158	-456.314
0.256681	0.334275	-456.722
0.213403	0.270741	-457.351
0.209408	0.310146	-457.419
0.0853222	0.296292	-459.258
0.0747337	0.249517	-459.405
0.0993943	0.185047	-459.025
0.150164	0.205084	-463.126
0.110837	0.141952	-458.846
0.125027	0.118446	-458.63
0.133911	0.0664919	-463.337
0.199396	0.112441	-457.525
0.228537	0.164384	-457.103
0.0258051	-0.0289516	-460.073
0.240238	-0.324714	-456.84
0.297773	-0.111647	-401.662
0.331901	-0.0376697	-400.589
0.148449	-0.158133	-404.56
-0.172876	-0.240231	-405.855
-0.0614424	-0.0959173	-407.827
-0.156572	0.129761	-402.709
0.0736114	0.239741	-398.005
0.0790577	0.109928	-398.984
0.100907	0.0616752	-399.003
0.0388854	0.0129178	-405.335
0.0127268	-0.037283	-401.288
0.104	-0.0691818	-404.758
0.198308	-0.0222633	-397.963
0.220197	0.0176375	-397.292
0.159428	0.0424567	-398.144
0.123445	0.00202737	-403.955
0.240323	-0.0852731	-402.49
0.272301	-0.0140595	-401.473
0.274484	0.118372	-395.515
0.225184	0.0974276	-401.396
0.377713	0.182027	-393.193
0.290422	0.193565	-394.616
0.265262	0.245278	-394.626
0.228859	0.194954	-400.525
0.223363	0.285332	-395.023
0.144678	0.305529	-396.225
0.255404	0.206228	-395.12
0.20424	0.0305996	-402.313
0.221534	0.127824	-396.358
0.177749	-0.0915014	-403.619
0.195043	-0.24356	-409.154
0.329218	-0.318038	-397.601
-0.0923252	-0.0574747	-308.995
-0.12444	-0.156596	-305.505
0.105359	-0.0270743	-322.056
0.134069	-0.0233126	-323.286
0.0541204	0.0320581	-313.132
0.0696421	0.0492034	-313.302
0.105878	0.0910678	-308.788
0.0852585	0.133005	-311.353
0.167529	0.0560321	-317.602
0.1235	0.0582547	-320.352
0.221454	0.0720517	-319.58
0.234226	0.068203	-315.439
0.308335	0.107311	-317.614
0.268516	0.00949769	-323.745
0.268816	-0.0174094	-324.502
0.231627	0.120227	-313.662
0.2185	0.141047	-312.393
0.297763	0.296078	-311.112
0.254286	-0.184936	-328.073
-0.137906	-0.22223	-209.376
0.00564972	-0.137452	-224.644
-0.122647	0.18882	-221.333
0.062032	0.257916	-239.469
0.075917	0.255648	-240.677
0.100216	0.253373	-242.836
0.129679	0.187176	-243.778
0.068887	0.132333	-236.776
0.060071	0.0814011	-240.244
0.10013	-0.0146176	-230.211
0.165388	-0.0574096	-240.899
0.189061	0.0271535	-250.591
0.199054	0.106659	-247.986
0.209019	0.147814	-244.365
0.192249	0.161363	-243.192
0.213033	0.238992	-252.759
0.241908	0.161516	-253.349
0.279596	0.128957	-250.313
0.290006	0.122933	-251.104
0.277261	0.0996322	-249.324
0.335062	0.159184	-261.795
0.324751	0.164262	-255.369
0.151964	-0.266516	-235.322
0.209793	-0.32196	-239.449
0.238119	-0.367825	-241.082
0.432622	-0.199969	-262.338
0.388493	-0.298029	-261.886
0.232701	0.0891417	-244.978
0.259972	0.341971	-259.767
0.0554909	0.00751888	-232.255
-0.110689	0.0240612	-165.654
-0.110076	-0.0702262	-171.651
-0.108823	-0.261582	-178.021
-0.0144369	-0.0108159	-165.814
0.110688	0.0955387	-157.725
0.139437	0.134927	-150.175
0.156355	0.0789591	-155.011
0.199758	0.0905633	-146.694
0.263068	0.0330358	-148.703
0.272417	0.0429095	-148.087
0.304861	-0.116524	-146.739
0.434544	-0.269265	-133.776
0.330862	-0.327904	-151.556
0.212827	-0.306561	-153.074
0.216894	-0.244407	-152.592
0.267593	-0.358617	-149.924
0.253811	0.213538	-148.441
0.264666	0.171378	-142.358
0.250251	0.235304	-148.559
0.132077	0.232735	-150.177
0.115479	0.249937	-156.725
0.122436	0.271538	-156.201
0.0860485	0.201374	-164.358
0.263194	0.315019	-141.79
0.43508	0.0353556	-138.185
0.330404	0.107132	-144.25
0.146721	0.0281755	-155.833
0.0785556	0.0106301	-154.464
0.0413855	0.0941175	-161.965
0.260641	-0.170044	-144.028
0.256068	-0.0991376	-68.2426
0.169059	-0.307346	-87.76
0.290638	0.0444964	-65.1007
0.310348	0.0570095	-63.4269
0.219974	0.115703	-59.0162
0.234593	0.13279	-57.3397
0.255962	0.138921	-61.5562
0.211871	0.18881	-55.3434
0.198385	0.151469	-63.7092
0.255241	0.213103	-51.8409
0.285657	0.211617	-56.0338
0.268079	0.243804	-55.1107
0.249485	0.235924	-56.4711
0.283821	0.281166	-46.6319
0.115674	0.294204	-54.2353
0.125408	0.242683	-56.6243
0.118666	0.214651	-64.1373
0.119044	0.079842	-71.6316
0.0913097	0.112703	-71.1741
0.04301	0.237042	-66.6374
-0.102141	-0.150502	15.9988
0.175038	-0.154752	3.65985
0.253275	-0.0593466	-1.16655
0.303967	-0.0530371	2.28421
0.360104	-0.135707	-4.44165
0.297842	0.0844012	9.96379
0.287879	0.104617	17.2214
0.180622	0.0695801	14.8308
0.219864	0.113956	9.83586
0.186716	0.123315	11.9863
0.180638	0.173442	20.7632
0.230598	0.211754	26.1338
0.126017	0.0555439	16.6905
0.0419773	0.0120217	18.3006
0.245037	0.203515	19.3422
0.23571	0.269546	29.186
0.320255	-0.342693	-18.1055
0.299326	-0.321237	-16.0499
0.233841	-0.285556	-11.136
0.0713016	0.0561236	13.7735
0.0982557	0.193881	20.3292
0.277395	-0.173729	-2.24516
-0.138371	-0.127726	85.9745
0.133069	-0.0460039	82.734
0.0470973	0.0147337	81.0971
0.30372	-0.00515868	73.2235
0.220438	0.0410408	82.5015
0.232393	-0.0131636	80.682
0.187643	0.0131647	77.0367
0.165572	0.0101728	83.1946
0.126118	0.09022	80.9781
0.199354	0.0677121	83.8597
0.204073	0.0494257	77.5947
0.212639	0.132368	79.7001
0.247469	0.196196	86.1254
0.185517	0.210221	82.681
0.159992	0.265266	90.0629
-0.0720473	-0.0524428	186.622
0.196867	-0.278811	147.078
0.251673	-0.275574	146.633
0.313783	-0.0727033	137.693
0.173856	-0.0923096	158.6
0.250697	0.042861	152.532
0.236641	0.0964444	160.812
0.147681	0.0417288	164.021
0.181335	0.156209	168.206
0.092727	0.178333	178.556
0.0899697	0.158608	172.842
0.214757	0.17244	159.179
0.218212	0.203981	153.812
0.256098	0.171008	160.152
0.347224	-0.369493	128.658
0.226736	0.0623521	228.944
0.272912	-0.0744436	229.835
0.227931	-0.258484	226.605
0.411571	-0.247594	222.164
0.231749	-0.333584	219.108
0.109806	0.0355943	236.79
-0.152562	-0.23496	230.221
0.178608	0.0939727	236.683
0.196341	0.142599	231.995
0.245891	0.19828	237.917
0.279157	0.268033	233.43
-0.156319	-0.286643	344.199
-0.0780172	-0.219597	339.474
0.00793744	-0.0670214	339.912
0.117164	0.0956124	335.118
0.111089	0.160942	333.199
0.240212	0.0238007	336.969
0.229872	-0.0111145	332.37
0.259359	0.107575	334.449
0.312451	0.0955756	326.884
0.296933	0.158518	332.368
0.252047	0.18298	326.624
0.227678	0.232855	325.802
0.27805	0.220249	328.508
0.219056	0.208021	325.956
0.192765	0.148537	333.385
0.259651	-0.138039	335.57
0.279734	-0.107125	337.082
0.378643	-0.26026	326.58
-0.111995	-0.127834	401.662
-0.127989	-0.0887595	399.906
-0.078331	-0.053095	397.646
-0.0349747	-0.0234223	400.738
0.336824	-0.272027	406.106
0.202311	-0.15776	404.414
0.300852	0.0237667	406.351
0.31194	0.0749004	412.671
0.303819	0.0646352	412.395
0.243854	0.0942458	404.068
0.22045	0.0519941	404.988
0.147925	0.0592779	407.267
0.102249	0.0945297	401.145
0.127891	0.201384	404.654
0.0991727	0.214441	406.049
0.223505	0.187906	406.488
0.280198	0.166534	407.433
0.354518	0.277615	415.693
0.232812	0.395124	414.42
0.302573	0.0604974	474.764
0.228464	0.0271485	475.902
0.186323	0.0379342	476.417
0.183199	0.0433193	476.435
0.166036	0.0390195	476.683
0.122314	0.0896465	477.044
0.130098	0.126253	476.777
0.102676	0.344852	476.176
0.0505486	0.0509127	478.174
-0.0827212	-0.199	479.204
0.19328	0.166068	475.757
0.247869	0.225268	474.765
0.279884	0.178953	474.542
0.23382	0.142394	473.47
0.270595	0.19782	560.436
0.294015	0.16356	557.833
0.31352	0.221444	560.939
0.29897	0.0494165	559.484
0.365894	0.0404258	555.515
0.260239	-0.130911	562.497
0.225117	-0.111905	561.763
0.299869	-0.345936	561.174
0.0947862	0.170439	562.281
0.166822	0.224349	563.725
-0.175859	-0.165742	656.923
-0.176487	-0.202139	649.528
0.118088	-0.274643	647.229
0.347699	0.0206549	633.63
0.353196	0.0554185	638.127
0.158491	0.183226	637.811
0.0432092	0.0635007	641.559
0.112879	0.087919	633.295
0.0835688	0.211453	633.741
0.207764	0.218497	632.651
0.213272	0.189716	630.453
0.24074	0.279439	635.653
0.265105	0.210876	633.927
-0.104939	-0.121296	707.07
0.129042	-0.0903315	707.915
0.2471	-0.161097	705.417
0.30754	-0.111526	711.13
0.23536	-0.00630009	705.351
0.268338	0.0304109	711.243
0.344588	0.0549344	705.311
0.28817	0.1178	715.51
0.232727	0.105635	718.672
0.224794	0.177433	717.384
0.237898	0.17042	711.539
0.250291	0.175877	717.069
0.129336	0.152353	709.618
0.154672	0.063831	713.165
0.408622	-0.138806	709.547
0.107808	0.133505	712.27
-0.131746	-0.201838	791.819
-0.151876	-0.17726	780.391
-0.111105	-0.0429093	805.917
-0.0513856	-0.0335684	811.246
0.0452182	0.0547999	815.996
0.144766	0.0735031	817.192
0.284231	-0.0474045	806.456
0.319062	-0.134783	796.468
0.27215	-0.285715	770.614
0.304062	-0.3637	771.442
0.342072	0.0210581	813.601
0.140227	0.195684	827.159
0.237977	0.201488	836.564
0.222072	0.258848	838.804
0.417382	0.184014	832.523
0.242513	0.351072	854.627
0.230751	0.344029	853.9
-0.174475	-0.15926	862.058
-0.162982	-0.295326	862.92
0.117923	0.194942	862.934
0.0782832	0.212623	862.424
0.175751	0.0218222	864.634
0.336615	0.0365308	866.142
0.355606	-0.0549054	866.869
0.384061	-0.109931	867.453
0.319113	-0.145721	867.002
0.231929	0.177993	864.18
0.221324	0.274153	863.451
0.193042	-0.137266	865.699

## Sheet: Sheet2
0.340372	-0.0236437	-1194.3
0.370893	-0.126161	-932.554
0.365752	-0.176438	-751.97
0.319836	-0.236615	-670.78
0.35138	-0.314588	-679.037
0.311006	-0.00681772	-547.602
0.327513	-0.16598	-542.672
0.287966	-0.18078	-542.559
0.373223	-0.118389	-454.9
0.361338	-0.09657	-455.08
0.402264	-0.225408	-454.451
0.337708	-0.322731	-455.393
0.302946	-0.223183	-397.444
0.35008	-0.0647118	-395.598
0.159085	-0.324693	-400.604
0.136955	-0.338792	-326.554
0.30078	-0.284528	-327.888
0.305679	-0.250596	-332.108
0.314308	-0.216871	-326.799
0.376441	-0.12402	-327.316
0.280272	-0.223221	-325.389
0.328707	-0.22928	-246.62
0.338373	-0.284562	-251.97
0.315545	-0.22363	-251.154
0.354847	-0.247043	-144.175
0.315022	-0.17895	-146.352
0.304896	-0.218544	-147.119
0.307219	-0.245113	-147.077
0.332932	-0.184393	-145.278
0.360823	-0.175744	-143.542
0.292556	-0.210447	-77.1787
0.323576	-0.151973	-78.5655
0.389766	-0.158511	-6.98804
0.379813	-0.201872	-14.2126
0.314193	-0.222243	-0.762875
0.35949	-0.213137	72.264
0.308194	-0.246865	72.9224
0.308109	-0.251369	146.381
0.329139	-0.198562	214.218
