# Supplementary material for: Spinal premotor interneurons controlling antagonistic muscles are spatially intermingled
Source: eLife. 2022 Dec 13;11:e81976. doi: 10.7554/eLife.81976 (PMC9844990; doi:10.7554/eLife.81976)
Supplement: Figure 12—figure supplement 3—source data 2. [file elife-81976-fig12-figsupp3-data2.xlsx]

## Sheet: Sheet1
-0.152801	-0.208785	-2794.03
0.154461	-0.227727	-2787.58
0.266601	-0.168055	-2788.57
0.244601	-0.14558	-2788.62
0.218001	-0.134669	-2798.37
0.315459	-0.23506	-2795.03
0.297134	-0.0860568	-2796.35
0.363299	-0.0935338	-2794.49
0.354893	-0.0518911	-2797.32
0.292076	-0.0519175	-2790.33
0.29017	-0.0172362	-2790.13
0.283432	0.0354697	-2787.93
0.207199	-0.0705474	-2793.27
0.228208	-0.013076	-2792.88
0.201412	0.0453446	-2792.45
0.188273	-0.0132084	-2798.33
0.166239	-0.116637	-2790.07
0.116512	0.111959	-2791.16
0.11806	0.154019	-2790.28
0.110091	0.221029	-2791.08
0.141298	0.165048	-2797.08
0.07398	0.0413244	-2797.77
0.0463576	-0.0618409	-2796.69
0.262015	0.187692	-2789.52
0.270741	0.122646	-2795.51
0.236922	0.122256	-2798.38
0.240256	0.097566	-2792.61
0.227275	0.0475607	-2786.95
0.204562	0.130704	-2791.55
0.320391	0.235601	-2790.39
0.1206	0.0910769	-2785.12
0.127632	0.0472889	-2789.12
0.256148	0.226744	-2796.43
0.213022	0.0108849	-2789.23
0.371404	-0.181009	-2793.53
0.328482	0.00380087	-2796.43
-0.254496	0.176837	-2712.24
-0.273136	0.022124	-2704.43
-0.171579	-0.00243444	-2705.5
-0.102406	-0.0725777	-2712.33
-0.109741	-0.117154	-2709.6
-0.124645	-0.183082	-2715.05
0.0431466	0.00990509	-2718.07
0.0247602	0.126641	-2706.82
0.163301	0.205489	-2709.86
0.153301	0.249543	-2709.74
0.139918	0.319838	-2707.72
0.296165	0.2359	-2712.53
0.30831	0.145302	-2717.95
0.232725	0.157001	-2708.57
0.219295	0.181399	-2711.06
0.208631	0.14646	-2714.92
0.200903	0.12694	-2710.72
0.247478	0.104097	-2707.52
0.264963	0.100684	-2708.18
0.272095	0.0406403	-2709.24
0.237159	0.0310035	-2710.16
0.245918	0.0125344	-2718.15
0.213635	-0.0769073	-2705.92
0.280522	-0.142098	-2715.16
0.287473	-0.117443	-2711.39
0.320772	-0.0320256	-2713.96
0.342949	-0.0272572	-2715.7
0.360058	-0.14361	-2706.82
0.328225	-0.161069	-2716.81
0.365882	-0.321929	-2717.31
0.211469	-0.235354	-2708.18
-0.0950664	-0.112355	-2628.66
-0.0821953	-0.10457	-2625.42
-0.0735099	-0.0292375	-2625.42
-0.0603327	-0.124279	-2631.9
-0.119441	-0.178948	-2625.42
-0.0813091	-0.189763	-2628.66
-0.175735	-0.232769	-2628.66
-0.254545	-0.264788	-2628.66
0.318928	-0.0435944	-2631.9
0.305549	-0.0416037	-2628.66
0.331552	-0.00614759	-2635.14
0.356328	-0.0611788	-2631.9
0.362421	-0.0868659	-2635.14
0.325053	-0.0977987	-2631.9
0.313193	-0.1649	-2631.9
0.259905	-0.188875	-2635.14
0.195016	-0.124005	-2631.9
0.188731	0.00196341	-2631.9
0.25925	0.0831381	-2631.9
0.301962	0.0647082	-2628.66
0.217925	0.0545974	-2628.66
0.165743	0.113063	-2628.66
0.196432	0.137935	-2635.14
0.236372	0.174541	-2635.14
0.145598	0.178697	-2631.9
0.090303	0.158852	-2635.14
0.0509413	0.158695	-2635.14
0.0617945	0.0610921	-2628.66
0.163283	0.298847	-2628.66
0.159864	0.0747445	-2631.9
0.124779	-0.0267746	-2635.14
0.220866	-0.0479684	-2631.9
0.140714	0.252531	-2628.66
0.131776	0.360061	-2628.66
-0.130819	-0.160069	-2545.42
-0.129116	-0.180903	-2551.9
0.0563506	-0.137947	-2548.66
0.184249	-0.07406	-2548.66
0.262214	-0.248402	-2548.66
0.299266	-0.343804	-2545.42
0.233329	-0.392058	-2545.42
0.202772	-0.344871	-2551.9
0.29093	-0.035601	-2548.66
0.341986	0.00519384	-2545.42
0.348891	-0.0643462	-2545.42
0.302868	0.159106	-2545.42
0.263875	0.131339	-2545.42
0.262122	0.0630525	-2545.42
0.243378	0.0662167	-2551.9
0.245679	0.149286	-2551.9
0.192801	0.128	-2551.9
0.178069	0.154127	-2548.66
0.17448	0.208386	-2548.66
0.11811	0.158265	-2548.66
0.138373	-0.029203	-2548.66
0.169612	-0.0115817	-2551.9
0.219118	-0.00773323	-2542.18
0.0546873	0.0399878	-2551.9
0.0182639	0.0445095	-2548.66
0.0842224	0.197342	-2548.66
0.143626	0.281233	-2548.66
0.137243	0.358835	-2551.9
0.0708455	0.309366	-2545.42
0.0893472	0.263405	-2545.42
0.103419	0.297765	-2545.42
0.312677	-0.113631	-2548.66
0.0853832	0.0275465	-2545.42
0.117639	0.259593	-2545.42
0.15725	0.331949	-2555.14
0.306545	0.0196414	-2545.42
0.223778	-0.265941	-2545.42
0.0337755	0.292297	-2551.9
0.286584	-0.376257	-2462.18
0.258515	-0.247272	-2468.66
0.246945	-0.211405	-2462.18
0.350879	-0.0631864	-2468.66
0.261352	-0.0553299	-2468.66
0.360041	-0.143198	-2462.18
0.18852	-0.0956652	-2468.66
0.156692	-0.0469823	-2465.42
0.131743	-0.0125919	-2465.42
-0.0741659	0.0918234	-2465.42
-0.1187	-0.105371	-2465.42
-0.145171	-0.158714	-2465.42
0.12185	0.0473334	-2468.66
0.136713	0.0670187	-2468.66
0.167769	0.0253715	-2468.66
0.202615	0.011979	-2468.66
0.222293	0.0113264	-2465.42
0.221646	0.0453239	-2465.42
0.209126	0.0547312	-2468.66
0.271917	0.048005	-2465.42
0.227238	0.0983247	-2468.66
0.259674	0.0797143	-2465.42
0.26092	0.1505	-2462.18
0.280772	0.164448	-2462.18
0.247781	0.1845	-2465.42
0.230561	0.217605	-2465.42
0.206227	0.226041	-2465.42
0.181647	0.123779	-2465.42
0.165591	0.135914	-2465.42
0.161573	0.190136	-2465.42
0.128579	0.133368	-2465.42
0.113923	0.160583	-2462.18
0.0752529	0.158744	-2462.18
0.097864	0.129568	-2468.66
0.279489	0.228826	-2462.18
0.1361	0.288401	-2468.66
0.135418	0.379296	-2462.18
0.224407	0.245036	-2465.42
0.329361	-0.0534313	-2388.66
0.352369	-0.103527	-2388.66
0.24285	-0.193833	-2382.18
0.193852	-0.124219	-2385.42
0.176206	-0.222929	-2395.14
-0.0895516	-0.123472	-2391.9
-0.0759602	-0.0953118	-2395.14
-0.115174	-0.0347332	-2395.14
-0.10527	-0.160053	-2388.66
-0.253072	0.178429	-2388.66
-0.218951	0.207568	-2395.14
-0.250138	0.154416	-2395.14
0.275065	0.254258	-2385.42
0.334385	0.284352	-2388.66
0.328995	0.120104	-2382.18
0.182887	0.147053	-2388.66
0.234837	0.177415	-2395.14
0.24448	0.199403	-2388.66
0.213046	0.206916	-2391.9
0.1655	0.120317	-2391.9
0.104766	0.0898508	-2385.42
0.109265	0.0658877	-2382.18
0.0978394	0.161462	-2391.9
0.144333	-2.42985e-05	-2385.42
0.207209	-0.0584014	-2388.66
0.22691	-0.0654123	-2395.14
0.2185	-0.00443932	-2388.66
0.210607	0.0211846	-2395.14
0.206305	0.0437191	-2395.14
0.242297	-0.0194147	-2395.14
0.283388	0.0145152	-2395.14
0.324839	0.0340074	-2391.9
0.0419633	-0.00436721	-2388.66
0.0429583	0.013829	-2395.14
0.105724	0.240785	-2388.66
0.173069	0.235847	-2385.42
0.263614	-0.249313	-2395.14
-0.245816	0.0956883	-2311.9
-0.226659	-0.0944229	-2305.42
-0.127016	-0.143982	-2308.66
-0.133741	-0.241012	-2311.9
-0.14743	-0.255607	-2308.66
-0.0791725	-0.208664	-2315.14
-0.0880486	-0.057676	-2315.14
-0.177862	-0.125427	-2308.66
0.195398	0.0123175	-2311.9
0.0546407	-0.0695281	-2305.42
-0.0643231	-0.0931248	-2308.66
0.110865	0.059308	-2308.66
0.127879	0.0411027	-2302.18
0.0604976	0.0383598	-2315.14
0.126687	0.143098	-2308.66
0.13694	0.161902	-2311.9
0.169054	0.143641	-2305.42
0.187472	0.217123	-2308.66
0.111687	0.301318	-2302.18
0.256543	0.253242	-2308.66
0.260763	0.271749	-2311.9
0.271293	0.265939	-2308.66
0.283674	0.185073	-2311.9
0.233465	0.213795	-2308.66
0.212222	0.24719	-2302.18
0.092991	0.241101	-2315.14
0.205716	0.15023	-2305.42
0.223287	0.17025	-2305.42
0.238253	0.112775	-2302.18
0.241895	0.0825061	-2308.66
0.241432	0.0553446	-2308.66
0.207602	0.0776289	-2308.66
0.160329	0.105638	-2308.66
0.188055	-0.0521101	-2311.9
0.168391	-0.0504502	-2302.18
0.221904	-0.0570628	-2315.14
0.245211	-0.0548101	-2302.18
0.23663	-0.10752	-2311.9
0.290168	-0.00805095	-2311.9
0.26823	-0.0156623	-2305.42
0.312189	0.0739857	-2308.66
0.340745	0.0275544	-2305.42
0.317932	0.169195	-2311.9
0.287786	0.218915	-2305.42
0.220857	0.0750293	-2311.9
0.27698	-0.171618	-2311.9
0.241164	-0.206455	-2308.66
0.312937	-0.267239	-2305.42
0.288242	-0.361107	-2305.42
0.132909	0.000468116	-2311.9
0.177898	0.0451558	-2302.18
0.242727	0.0339147	-2305.42
0.193616	0.037032	-2308.66
0.120258	-0.141615	-2315.14
-0.270928	0.195888	-2228.66
-0.321463	0.0134371	-2225.42
-0.315339	-0.0570336	-2228.66
-0.232694	-0.272583	-2228.66
-0.204597	-0.219251	-2231.9
-0.180311	-0.175931	-2228.66
-0.161427	-0.154795	-2228.66
-0.110227	-0.103839	-2231.9
-0.0545323	-0.109647	-2225.42
-0.0789404	-0.0732098	-2235.14
-0.0422581	0.00383814	-2225.42
0.185155	-0.102549	-2228.66
0.206474	-0.0709317	-2231.9
0.284389	-0.0272514	-2225.42
0.31438	0.0290979	-2231.9
0.301269	0.078979	-2228.66
0.282849	0.0993425	-2231.9
0.26559	0.0345039	-2225.42
0.338084	-0.110972	-2228.66
0.263875	-0.25201	-2228.66
0.220647	-0.232472	-2231.9
0.19669	-0.231992	-2225.42
0.157188	-0.205814	-2235.14
0.198317	-0.28956	-2228.66
0.236798	-0.335109	-2231.9
0.318694	-0.433626	-2231.9
0.247519	0.0970568	-2228.66
0.242233	0.0865673	-2225.42
0.230704	0.0848868	-2225.42
0.219832	0.0683175	-2225.42
0.207286	0.0178258	-2235.14
0.202685	0.0384982	-2225.42
0.17732	0.0629818	-2228.66
0.172381	0.015818	-2228.66
0.180846	-0.0272119	-2231.9
0.175448	-0.0442021	-2225.42
0.158413	-0.0391994	-2231.9
0.156021	-0.0240821	-2231.9
0.135195	-0.0137805	-2231.9
0.0853602	0.077941	-2225.42
0.0733218	0.119551	-2231.9
0.0378434	0.0656997	-2231.9
0.115183	0.217812	-2225.42
0.178091	0.161976	-2231.9
0.179964	0.135509	-2231.9
0.201141	0.166992	-2231.9
0.236972	0.206505	-2225.42
0.242422	0.158538	-2225.42
0.262403	0.146449	-2231.9
0.277931	0.155584	-2231.9
0.231819	0.175884	-2235.14
0.193831	0.103554	-2228.66
-0.154097	-0.049826	-2151.9
-0.177096	-0.143778	-2148.66
-0.12244	-0.114034	-2155.14
-0.112945	-0.0991491	-2155.14
-0.0473546	0.0206466	-2151.9
0.0016076	-0.0700943	-2151.9
-0.218122	0.177489	-2155.14
0.0784868	0.113735	-2148.66
0.0795392	0.0580184	-2155.14
0.0910506	0.0592944	-2151.9
0.132828	0.0622611	-2148.66
0.122843	0.0844679	-2155.14
0.108896	0.214857	-2145.42
0.161403	0.161748	-2142.18
0.15443	0.138583	-2148.66
0.209751	0.114525	-2145.42
0.223361	0.136844	-2145.42
0.245358	0.108867	-2148.66
0.249184	0.123334	-2148.66
0.283727	0.0836046	-2145.42
0.300174	0.0921027	-2145.42
0.22469	0.234751	-2148.66
0.209861	0.256082	-2145.42
0.189853	0.0745636	-2145.42
0.178527	0.087096	-2151.9
0.208412	0.0602989	-2142.18
0.214124	0.0805677	-2151.9
0.177088	0.0700823	-2148.66
0.186765	0.0252333	-2142.18
0.192762	-0.022825	-2155.14
0.183772	-0.0169558	-2148.66
0.128505	-0.0335998	-2155.14
0.110895	0.00623232	-2151.9
0.272786	-0.0545563	-2151.9
0.327637	-0.0239473	-2142.18
0.339198	-0.0636243	-2151.9
0.296645	-0.125361	-2145.42
0.240125	-0.190622	-2151.9
0.217007	-0.0648425	-2145.42
0.139591	-0.155273	-2145.42
0.233221	-0.300117	-2151.9
0.238697	-0.252492	-2148.66
0.328117	-0.168892	-2151.9
0.339629	-0.167592	-2148.66
0.364432	-0.167445	-2145.42
0.377403	-0.14709	-2148.66
0.230407	0.254835	-2148.66
-0.166446	-0.074372	-2155.14
0.157848	-0.0104781	-2151.9
0.121525	0.16533	-2151.9
-0.225721	-0.268033	-2071.9
-0.201054	-0.235609	-2068.66
-0.21768	-0.166087	-2065.42
-0.148943	-0.218886	-2068.66
-0.0612314	-0.0948767	-2071.9
-0.0932925	-0.0916625	-2068.66
-0.186077	0.00200126	-2068.66
-0.0533552	-0.0329208	-2071.9
-0.0963026	-0.191285	-2071.9
-0.105907	-0.24153	-2068.66
0.301407	-0.160789	-2068.66
0.371398	-0.201758	-2068.67
0.371452	-0.151669	-2062.19
0.238847	-0.211034	-2065.42
0.221854	-0.335978	-2068.66
0.208723	-0.262478	-2065.42
0.260771	-0.077063	-2062.18
0.158612	-0.0966964	-2068.66
0.116948	-0.00717721	-2071.9
0.186963	0.0192726	-2068.66
0.234903	0.0121789	-2068.66
0.253541	0.0381277	-2065.42
0.28587	0.0305955	-2065.42
0.283881	0.00251746	-2068.66
0.32382	0.0315588	-2068.66
0.34238	0.119733	-2068.66
0.260335	0.1	-2065.42
0.255093	0.131565	-2068.66
0.251168	0.149088	-2065.42
0.246925	0.18133	-2068.66
0.270518	0.132101	-2065.42
0.22632	0.203578	-2065.42
0.193975	0.186334	-2068.66
0.179964	0.260608	-2068.66
0.244328	0.228654	-2068.66
0.117884	0.0660275	-2068.66
0.0708545	0.0400333	-2068.66
0.269712	0.0636979	-2071.9
0.256427	0.064077	-2068.66
0.187179	0.00174797	-2068.66
0.238426	-0.116197	-2068.66
0.283872	-0.0827452	-2068.66
0.315649	0.194991	-1991.9
0.259744	0.129586	-1988.66
0.310449	0.0527601	-1991.9
0.324788	0.0319896	-1988.66
0.349285	0.00589114	-1995.14
0.35829	-0.016475	-1991.9
0.387917	-0.205691	-1988.66
0.331027	-0.200695	-1988.66
0.315349	-0.200282	-1988.66
0.293473	-0.165596	-1991.9
0.262549	-0.203869	-1988.66
0.209162	-0.265826	-1988.66
0.269619	-0.133252	-1991.9
0.282957	-0.0961581	-1988.66
0.291141	-0.0387485	-1988.66
0.270939	-0.065233	-1991.9
0.32666	-0.0976284	-1991.9
0.26135	0.00583239	-1991.9
0.244147	-0.050793	-1985.42
0.240873	-0.0200041	-1985.42
0.217913	-0.0422377	-1985.42
0.185149	-0.0201049	-1988.66
0.167113	-0.0169077	-1991.9
0.172201	-0.0652862	-1988.66
0.171867	-0.160558	-1988.66
0.208365	-0.127075	-1991.9
0.123434	-0.0907494	-1988.66
0.0591243	-0.00282972	-1991.9
0.0648885	-0.030504	-1995.14
0.0655096	0.0425948	-1995.14
0.0979889	0.0763806	-1988.66
0.159003	0.0768404	-1988.66
0.162106	0.0627843	-1991.9
0.153269	0.0434241	-1985.42
0.179663	0.0302337	-1985.42
0.180542	0.0055232	-1985.42
0.222534	0.0797179	-1991.9
0.209941	0.114879	-1991.9
0.225301	0.113705	-1985.42
0.237823	0.120558	-1991.9
0.224336	0.168426	-1988.66
0.222148	0.196792	-1991.9
0.189662	0.156274	-1988.66
0.159565	0.136931	-1988.66
0.321669	0.256217	-1988.66
0.11963	0.285045	-1991.9
0.231706	0.280031	-1988.66
0.101665	0.152442	-1991.9
0.129356	0.10557	-1988.66
0.10089	0.0983417	-1991.9
-0.0643245	0.0132855	-1991.9
-0.107185	0.0743877	-1995.14
-0.11405	-0.0322548	-1991.9
-0.293396	0.0735295	-1988.66
-0.178061	-0.176191	-1988.66
-0.127174	-0.166777	-1991.9
-0.111758	-0.159882	-1995.14
-0.121812	-0.140244	-1985.42
0.216942	0.0395476	-1991.9
0.159915	0.109173	-1991.9
0.0369281	-0.00138385	-1991.9
-0.15613	-0.172019	-1911.9
-0.148981	-0.159914	-1911.9
-0.150523	-0.232804	-1911.9
-0.0925053	-0.201174	-1908.66
-0.16709	0.0349634	-1915.14
-0.146137	0.278772	-1908.66
-0.25316	-0.0674493	-1905.42
-0.297987	0.0404826	-1905.42
-0.0615087	-0.153305	-1915.14
-0.138654	-0.155419	-1915.14
-0.00929721	-0.0690027	-1905.42
0.077318	0.0680127	-1915.14
0.133023	0.138195	-1911.9
0.128453	0.11084	-1915.14
0.155936	0.101487	-1911.9
0.132555	0.0865459	-1911.9
0.224337	0.121085	-1911.9
0.240671	0.0910884	-1911.9
0.128647	0.289327	-1905.42
0.0973442	0.198781	-1911.9
0.115679	0.183902	-1915.14
0.0990128	0.167706	-1908.66
0.307984	0.182347	-1915.14
0.275806	0.1799	-1911.9
0.244971	0.174471	-1915.14
0.255966	0.131707	-1905.42
0.275916	0.120878	-1911.9
0.282126	0.116356	-1915.14
0.312854	0.132236	-1911.9
0.318915	0.112262	-1908.66
0.310909	0.0932191	-1915.14
0.339407	0.101009	-1905.42
0.327181	0.0877342	-1908.66
0.325063	0.0653165	-1911.9
0.298603	0.0091585	-1911.9
0.342599	-0.0486054	-1908.66
0.375969	-0.0649994	-1911.9
0.393214	-0.0714376	-1915.14
0.318212	-0.0787871	-1905.42
0.338789	-0.0870072	-1915.14
0.298267	-0.205573	-1911.9
0.301632	-0.157363	-1908.66
0.438787	-0.301241	-1908.66
0.374907	-0.19262	-1915.14
0.373043	-0.206503	-1915.14
0.422584	-0.218436	-1911.9
0.291735	-0.0200194	-1908.66
0.216485	-0.140044	-1911.9
0.208046	-0.048077	-1911.9
0.212843	-0.0272355	-1911.9
0.192871	-0.017585	-1915.14
0.189906	-0.00256214	-1908.66
0.166372	-0.0215817	-1915.14
0.136284	-0.0174125	-1915.14
0.0920121	0.00295706	-1915.14
0.0764621	-0.0747134	-1908.66
0.0468031	0.0351058	-1908.66
0.15119	0.042773	-1915.14
0.163119	0.0363713	-1911.9
0.169489	0.0164798	-1915.14
0.210386	0.0807445	-1915.14
0.220192	0.0860078	-1911.9
0.227158	0.0568986	-1915.14
0.23346	0.0470308	-1908.66
0.216832	0.0534758	-1918.38
0.242187	0.0747669	-1908.66
0.258271	0.0989526	-1915.14
0.185091	0.105752	-1915.14
0.21214	0.153308	-1915.14
0.186595	0.0420901	-1911.9
0.166298	-0.113618	-1915.14
0.177061	-0.138116	-1915.14
0.154774	-0.0632808	-1915.14
0.0648824	-0.137132	-1915.14
0.269051	-0.0205593	-1905.42
-0.225615	-0.110594	-1828.66
-0.149942	-0.193471	-1825.42
-0.144783	-0.22971	-1831.9
-0.100512	-0.00363902	-1822.18
-0.00497417	-0.0711433	-1828.66
0.0641966	0.00630043	-1825.42
0.138974	-0.10526	-1828.66
0.17766	-0.0417842	-1825.42
0.122068	0.166316	-1828.66
0.141107	0.17353	-1828.66
0.146193	0.129382	-1825.42
0.147309	0.114185	-1831.9
0.15115	0.0866344	-1825.42
0.134841	0.0720736	-1831.9
0.131801	0.0552898	-1825.42
0.121538	0.0876876	-1822.18
0.0925942	0.0651365	-1831.9
0.176353	0.12891	-1831.9
0.198709	0.121459	-1825.42
0.186417	0.13674	-1828.66
0.161484	0.101917	-1825.42
0.224195	0.112712	-1825.42
0.236896	0.113736	-1831.9
0.255178	0.125523	-1828.66
0.2773	0.134337	-1831.9
0.316684	0.181882	-1828.66
0.333097	0.206155	-1828.66
0.352385	0.175494	-1828.66
0.332089	0.0881174	-1828.66
0.344124	0.223831	-1822.18
0.202429	0.285619	-1822.18
0.12586	0.198101	-1831.9
0.280961	0.0812555	-1822.18
0.308401	0.098384	-1831.9
0.292484	-0.0136576	-1825.42
0.289908	-0.0310134	-1828.66
0.260486	-0.0189902	-1825.42
0.253913	-0.0452638	-1822.18
0.278415	0.0328734	-1822.18
0.194268	0.0226989	-1828.66
0.216113	0.0754941	-1822.18
0.20968	0.0575569	-1825.42
0.165509	0.0680368	-1822.18
0.0892589	-0.00948873	-1828.66
0.15178	-0.0583378	-1831.9
0.249643	-0.0666375	-1822.18
0.286554	-0.0883374	-1825.42
0.30317	-0.147283	-1825.42
0.285536	-0.190049	-1828.66
0.259021	-0.281187	-1828.66
0.374206	-0.215036	-1828.66
0.388953	-0.273788	-1825.42
0.328984	-0.196685	-1828.66
0.311416	-0.410576	-1828.66
0.170031	-0.27787	-1825.42
0.274895	0.193604	-1831.9
-0.287488	0.215832	-1745.42
0.209661	-0.34043	-1751.9
0.263055	-0.342262	-1751.9
0.262901	-0.393806	-1748.66
0.294266	-0.381928	-1748.66
0.404408	-0.273671	-1745.42
0.401507	-0.222342	-1748.66
0.359503	-0.159323	-1751.9
0.312273	-0.0886344	-1755.14
0.224447	-0.11923	-1745.42
0.248497	-0.0820664	-1748.66
0.289689	-0.0444877	-1751.9
0.297822	-0.0166495	-1748.66
0.354909	-0.0534419	-1755.14
0.378386	-0.0261208	-1751.9
0.366986	0.0528981	-1751.9
0.299949	0.0358178	-1745.42
0.288083	0.0242706	-1748.66
0.271727	0.0253226	-1742.18
0.264882	0.0474699	-1751.9
0.236881	0.0345996	-1745.42
0.232098	0.0736546	-1745.42
0.22948	0.0859784	-1751.9
0.242994	0.0767153	-1745.42
0.256908	0.0893962	-1751.9
0.283302	0.0911244	-1748.66
0.239807	0.121284	-1745.42
0.204953	0.0193659	-1748.66
0.188063	0.0105644	-1751.9
0.190898	-0.0097798	-1748.66
0.171258	-0.0787908	-1745.42
0.149024	-0.036801	-1751.9
0.12873	-0.0295533	-1745.42
0.0786769	0.0286507	-1755.14
0.117612	0.182437	-1745.42
0.122926	0.240015	-1748.66
0.142164	0.187424	-1755.14
0.135306	0.162245	-1755.14
0.162596	0.154843	-1755.14
0.196844	0.12861	-1755.14
0.226819	0.157684	-1755.14
0.251702	0.177143	-1755.14
0.252994	0.153146	-1748.66
0.234128	0.18337	-1742.18
0.208646	0.183396	-1751.9
0.272134	0.144563	-1755.14
0.303878	0.166659	-1748.66
0.318542	0.167661	-1748.66
0.338114	0.18514	-1745.42
0.235518	-0.0476891	-1745.42
0.140205	0.0536276	-1751.9
0.124302	0.0919972	-1755.14
0.0269538	0.0813407	-1748.66
0.371716	0.196076	-1751.9
0.279084	-0.243031	-1751.9
0.257847	-0.222537	-1671.9
0.217324	-0.307858	-1675.14
0.229138	-0.339473	-1668.66
0.276849	-0.430367	-1675.14
0.379009	-0.151249	-1671.9
0.358579	-0.232819	-1675.14
0.303543	-0.123909	-1668.66
0.288245	-0.132474	-1668.66
0.252635	-0.126682	-1668.66
0.248591	-0.149998	-1675.14
0.233684	-0.126936	-1668.66
0.26336	-0.0901009	-1671.9
0.25519	-0.0511985	-1671.9
0.314922	-0.0359806	-1668.66
0.347079	-0.0576305	-1671.9
0.367136	-0.00163036	-1671.9
0.326826	0.0576014	-1668.66
0.30559	0.03542	-1675.14
0.286286	0.0719175	-1671.9
0.267867	0.0765531	-1671.9
0.284455	0.110681	-1678.38
0.232072	0.105157	-1668.66
0.231719	0.0211762	-1675.14
0.210336	-0.0304766	-1678.38
0.198612	-0.0674944	-1668.66
0.183193	-0.0317487	-1675.14
0.170198	-0.0347094	-1675.14
0.133664	-0.0505249	-1675.14
0.140649	0.0237155	-1668.66
0.11313	0.0314432	-1675.14
0.0812371	-0.0254516	-1675.14
0.065187	-0.00588761	-1668.66
0.0347995	0.0924717	-1675.14
0.159635	0.104609	-1675.14
0.193645	0.0841396	-1675.14
0.189693	0.166394	-1675.14
0.239449	0.166363	-1675.14
0.27878	0.154124	-1671.9
0.298379	0.191568	-1675.14
0.359396	0.198452	-1671.9
0.285845	0.248596	-1675.14
-0.00286905	-0.075048	-1671.9
-0.0717094	-0.106438	-1678.38
-0.103942	-0.190474	-1671.9
-0.12028	-0.176553	-1675.14
-0.131382	-0.174634	-1675.14
-0.15401	-0.26201	-1668.66
-0.190704	-0.178576	-1671.9
-0.15608	-0.0744621	-1675.14
-0.195371	0.0237154	-1675.14
0.390892	-0.344038	-1588.66
0.225752	-0.218915	-1595.14
0.168801	-0.254443	-1588.66
0.180067	-0.299621	-1595.14
0.214567	-0.315231	-1591.9
0.128901	-0.00070205	-1595.14
0.0658708	0.00635311	-1591.9
0.0479209	0.0352163	-1591.9
-0.0937293	-0.132615	-1598.38
-0.119882	-0.189541	-1588.66
-0.143956	-0.197936	-1588.66
-0.113601	-0.252076	-1595.14
-0.316788	-0.115491	-1588.66
-0.254092	-0.125288	-1588.66
-0.248137	0.168097	-1591.9
0.141806	0.166172	-1591.9
0.190754	0.217177	-1585.42
0.249781	0.242335	-1591.9
0.274882	0.233599	-1591.9
0.264876	0.196838	-1591.9
0.299798	0.170618	-1595.14
0.345969	0.261268	-1585.42
0.263263	0.142524	-1591.9
0.265979	0.1182	-1595.14
0.288587	0.115417	-1591.9
0.241765	0.0853465	-1585.42
0.238671	0.0991999	-1591.9
0.249863	0.0144861	-1591.9
0.267911	-0.00206722	-1591.9
0.281338	-0.000682358	-1588.66
0.335777	-0.0144807	-1591.9
0.35792	-0.0525055	-1595.14
0.239985	-0.0508722	-1588.66
0.175002	0.103067	-1591.9
0.159013	0.0535203	-1588.66
0.161451	0.132298	-1595.14
0.2271	0.189935	-1595.14
0.164602	0.202236	-1588.66
0.23951	-0.31974	-1588.66
0.21695	0.0603922	-1585.42
-0.235425	0.123736	-1505.42
-0.240241	0.160107	-1511.9
-0.287959	-0.0507098	-1508.66
-0.142681	-0.019216	-1508.66
-0.103528	-0.0555499	-1515.14
-0.0521429	-0.112823	-1505.42
-0.0605381	-0.0844846	-1505.42
-0.10732	-0.160194	-1505.42
-0.119484	-0.170499	-1508.66
-0.12059	-0.130887	-1508.66
-0.14118	-0.152724	-1505.42
-0.148037	-0.215598	-1508.66
-0.172199	-0.215591	-1505.42
0.312387	-0.268367	-1505.42
0.307969	-0.25352	-1508.66
0.275468	-0.25473	-1515.14
0.251079	-0.324394	-1505.42
0.287705	-0.358585	-1511.9
0.299372	-0.395371	-1511.9
0.325089	-0.400257	-1515.14
0.327337	-0.388024	-1515.14
0.418715	-0.357311	-1518.38
0.415646	-0.221519	-1505.42
0.457595	-0.202679	-1511.9
0.428249	-0.166624	-1511.9
0.361187	-0.208199	-1505.42
0.267589	-0.213331	-1508.66
0.264095	-0.124894	-1515.14
0.243467	-0.112418	-1518.38
0.226752	-0.302788	-1511.9
0.24507	-0.347087	-1508.66
0.295408	-0.033892	-1508.66
0.258497	-0.0466417	-1511.9
0.245397	-0.0256242	-1505.42
0.235796	0.00878247	-1515.14
0.299875	0.0235756	-1518.38
0.335076	-0.0807409	-1505.42
0.19215	-0.0370785	-1518.38
0.193801	0.0185534	-1518.38
0.150456	-0.00394797	-1505.42
0.156524	0.0497039	-1505.42
0.197585	0.0492428	-1518.38
0.226238	0.027852	-1518.38
0.249195	0.0520252	-1515.14
0.266922	0.0812044	-1518.38
0.268574	0.0941953	-1508.66
0.23081	0.0742849	-1518.38
0.206091	0.130702	-1508.66
0.15225	0.121631	-1511.9
0.134502	0.0996669	-1511.9
0.120669	0.148547	-1511.9
0.0842814	0.0716825	-1515.14
0.0762735	0.100064	-1515.14
0.0579191	0.103957	-1511.9
0.0384974	0.00707277	-1508.66
0.125238	0.222007	-1518.38
0.190913	0.204654	-1505.42
0.208596	0.234749	-1511.9
0.244816	0.246923	-1505.42
0.240869	0.180144	-1508.66
0.248124	0.160556	-1511.9
0.260805	0.181498	-1505.42
0.273904	0.133409	-1505.42
0.301227	0.155329	-1505.42
0.311292	0.136115	-1518.38
0.338112	0.18757	-1508.66
0.241454	0.147989	-1511.9
0.241369	0.122007	-1511.9
0.258296	0.117992	-1511.9
-0.23938	0.0915099	-1431.9
-0.26259	0.0794179	-1438.38
-0.333924	0.0718007	-1438.38
-0.351927	0.0670805	-1438.38
-0.292015	0.10873	-1431.9
-0.285557	0.129136	-1435.14
-0.331858	0.104947	-1431.9
-0.131889	-0.099443	-1428.66
-0.115772	-0.0842099	-1425.42
-0.0854315	0.0128302	-1435.14
-0.119884	-0.18329	-1431.9
-0.0144034	-0.117414	-1435.14
0.107464	-0.120336	-1435.14
0.0630446	-0.0154114	-1438.38
0.104909	0.197704	-1428.66
0.226003	0.136032	-1431.9
0.24304	0.140026	-1431.9
0.253522	0.0961397	-1435.14
0.263345	0.0430964	-1428.66
0.263248	0.0282167	-1435.14
0.27596	0.0178439	-1438.38
0.276607	-0.00276626	-1438.38
0.214098	-0.0590762	-1428.66
0.186366	-0.0823827	-1428.66
0.2537	-0.0846915	-1435.14
0.260806	-0.0984696	-1428.66
0.226087	-0.0933979	-1425.42
0.211777	-0.126866	-1428.66
0.235703	-0.167687	-1438.38
0.265519	-0.178123	-1431.9
0.270393	-0.192232	-1438.38
0.317343	-0.164521	-1431.9
0.335817	-0.154199	-1431.9
0.341747	-0.0737399	-1428.66
0.36876	-0.0448648	-1431.9
0.138491	0.0514783	-1431.9
0.115984	0.115384	-1431.9
0.171845	0.0468763	-1428.66
0.195261	0.057704	-1431.9
0.252591	0.231715	-1425.42
0.264482	0.184552	-1428.66
0.297602	0.137107	-1438.38
0.293464	0.176379	-1438.38
0.33203	0.0188393	-1435.14
0.290281	0.0534147	-1435.14
0.330478	-0.0178626	-1438.38
0.306375	-0.0305872	-1431.9
0.282122	-0.0773848	-1431.9
0.284736	-0.396077	-1435.14
0.251483	-0.383539	-1428.66
0.207451	-0.391621	-1431.9
0.189834	-0.368744	-1425.42
0.173443	-0.367601	-1435.14
0.152935	-0.344879	-1435.14
0.155138	-0.327855	-1431.9
0.189184	-0.338837	-1428.66
0.171342	-0.0995025	-1438.38
0.162176	-0.107449	-1428.66
0.117055	-0.0179948	-1425.42
0.2334	0.00188859	-1431.9
-0.310057	0.0895227	-1431.9
0.120596	0.250116	-1438.38
-0.263327	0.244051	-1348.66
-0.115595	-0.112404	-1358.38
-0.0931756	-0.169846	-1355.14
-0.152918	-0.180657	-1355.14
-0.0825596	-0.0635492	-1355.14
-0.219443	-0.199917	-1345.42
-0.00342788	-0.0816613	-1355.14
0.0624623	-0.0123254	-1358.38
0.00714926	0.0535914	-1355.14
0.0947968	0.143689	-1355.14
0.128089	0.153094	-1348.66
0.141527	0.177197	-1351.9
0.165399	0.144948	-1351.9
0.143376	0.120595	-1355.14
0.139893	0.096189	-1351.9
0.152624	0.043565	-1351.9
0.160796	0.0345049	-1355.14
0.193109	-0.000934158	-1351.9
0.156863	-0.00500482	-1358.38
0.136799	-0.0237247	-1348.66
0.190312	0.0883502	-1351.9
0.206852	0.0725361	-1351.9
0.223065	0.0821443	-1355.14
0.233253	0.0859475	-1348.66
0.220704	0.105949	-1345.42
0.228916	0.106284	-1355.14
0.241956	0.110585	-1358.38
0.201378	0.14675	-1355.14
0.235875	0.185327	-1355.14
0.242953	0.156292	-1355.14
0.258234	0.154025	-1355.14
0.259402	0.135977	-1355.14
0.229141	0.227667	-1351.9
0.315085	0.153707	-1348.66
0.341486	0.167118	-1345.42
0.367191	0.0395415	-1348.66
0.307293	0.0824774	-1358.38
0.262903	0.0742379	-1348.66
0.262517	0.0893653	-1345.42
0.254242	0.104417	-1351.9
0.291568	0.0479529	-1345.42
0.299522	0.0280917	-1348.66
0.29242	-0.00929895	-1358.38
0.286017	-0.031061	-1351.9
0.309122	-0.0212792	-1355.14
0.239219	0.039834	-1348.66
0.253411	0.028984	-1355.14
0.237512	0.000647662	-1355.14
0.220917	-0.032951	-1348.66
0.201174	-0.0553545	-1355.14
0.218445	-0.0737117	-1355.14
0.208302	-0.0906682	-1348.66
0.0935215	0.0730889	-1348.66
0.269743	-0.111691	-1358.38
0.244519	-0.119937	-1348.66
0.263654	-0.152946	-1355.14
0.281468	-0.190473	-1348.66
0.272156	-0.184883	-1358.38
0.309064	-0.221874	-1355.14
0.313483	-0.120246	-1348.66
0.338141	-0.101672	-1358.38
0.34528	-0.0612623	-1348.66
0.397064	-0.0385311	-1348.66
0.387899	-0.0687685	-1355.14
0.377736	-0.0472924	-1348.66
0.24295	-0.0784401	-1351.9
0.181613	-0.206259	-1345.42
0.191263	-0.26187	-1345.42
0.191909	-0.299918	-1351.9
0.204895	-0.341573	-1351.9
0.231591	-0.348043	-1351.9
0.269719	-0.36164	-1348.66
0.221234	-0.325016	-1355.14
0.254104	-0.254081	-1351.9
0.257407	-0.28137	-1351.9
0.279309	-0.294047	-1355.14
0.389971	-0.285773	-1348.66
0.383026	-0.327734	-1348.66
0.424179	-0.256658	-1351.9
0.33263	0.111743	-1348.66
0.33979	-0.150275	-1271.9
0.391912	-0.121838	-1265.42
0.255913	-0.372179	-1275.14
0.28122	-0.441331	-1268.66
0.218397	-0.217456	-1278.38
0.222629	-0.190333	-1271.9
0.252738	-0.140259	-1275.14
0.272075	-0.135914	-1268.66
0.281667	-0.0806191	-1278.38
0.298214	-0.0924546	-1271.9
0.295919	-0.071005	-1265.42
0.294831	-0.0444963	-1271.9
0.281193	-0.0135387	-1268.66
0.335307	0.00186053	-1268.66
0.332152	0.0407097	-1268.66
0.243304	-0.085564	-1271.9
0.228974	-0.110428	-1275.14
0.220194	-0.123699	-1275.14
0.217727	-0.0778342	-1275.14
0.168966	-0.054595	-1275.14
-0.301409	0.198008	-1275.14
-0.142804	-0.117636	-1271.9
-0.141748	-0.151233	-1275.14
-0.16562	-0.240315	-1271.9
0.0831497	-0.172234	-1275.14
0.0605999	-0.0343242	-1275.14
0.042509	-0.00055397	-1278.38
0.0534954	0.0241541	-1271.9
0.116514	0.00150941	-1275.14
0.137064	-0.0108178	-1278.38
0.126134	-0.0304386	-1271.9
0.123182	0.0493966	-1271.9
0.112701	0.0557449	-1278.38
0.103206	0.0680458	-1268.66
0.117364	0.114119	-1271.9
0.0852633	0.164201	-1268.66
0.0729904	0.173466	-1275.14
0.0936751	0.224842	-1278.38
0.150466	0.13024	-1268.66
0.190839	0.13012	-1268.66
0.179251	0.169577	-1268.66
0.195253	0.170903	-1265.42
0.218772	0.141676	-1278.38
0.261223	0.155233	-1275.14
0.264551	0.178385	-1275.14
0.275963	0.187916	-1275.14
0.270372	0.204235	-1271.9
0.285597	0.201944	-1271.9
0.329926	0.206427	-1275.14
0.268205	0.106144	-1271.9
0.244207	0.075611	-1268.66
0.237854	0.063735	-1271.9
0.220965	0.0675295	-1268.66
0.212615	0.0457243	-1265.42
0.142972	0.0838964	-1268.66
0.223923	0.0116729	-1268.66
0.200806	-0.00381299	-1275.14
0.240528	-0.00932121	-1275.14
0.265975	0.0964593	-1275.14
0.282308	0.135379	-1268.66
0.240243	0.133839	-1271.9
0.114426	0.278384	-1275.14
0.305253	-0.245662	-1275.14
-0.209164	-0.0637872	-1195.14
-0.13984	-0.103066	-1188.66
-0.0861245	-0.0991717	-1191.9
-0.114245	-0.150185	-1191.9
-0.140798	-0.150611	-1191.9
-0.159654	-0.148008	-1188.66
-0.150447	-0.178749	-1185.42
-0.175312	-0.18947	-1188.66
-0.215015	-0.288341	-1195.14
-0.108124	-0.197852	-1195.14
-0.21306	0.252594	-1195.14
-0.0987344	0.165099	-1188.66
-0.207852	0.240258	-1195.14
0.099875	0.226858	-1198.38
0.0509949	0.178422	-1195.14
0.130138	0.200153	-1191.9
0.191816	0.199644	-1195.14
0.263335	0.187105	-1191.9
0.232568	0.160001	-1188.66
0.254558	0.102037	-1195.14
0.265847	0.103127	-1191.9
0.274462	0.102208	-1191.9
0.298385	0.176575	-1195.14
0.299035	0.0366611	-1195.14
0.31236	0.0428712	-1195.14
0.222966	0.0581558	-1191.9
0.23556	0.057181	-1191.9
0.198619	0.0788321	-1195.14
0.144045	0.0596058	-1195.14
0.103018	0.0697707	-1195.14
0.0951822	0.0826712	-1195.14
0.110597	0.0985434	-1188.66
0.0736073	0.0465475	-1198.38
0.0588489	0.0284636	-1191.9
0.0432583	-0.00589963	-1195.14
0.00358645	-0.060541	-1188.66
0.0756944	-0.0128107	-1191.9
0.0804137	-0.00553467	-1188.66
0.0858569	0.0085498	-1188.66
0.171219	-0.0121223	-1188.66
0.163018	0.0318094	-1191.9
0.222109	-0.0304573	-1188.66
0.22557	-0.0152461	-1195.14
0.254729	-0.0186122	-1188.66
0.264121	-0.0079916	-1188.66
0.236401	-0.0605843	-1188.66
0.19478	-0.0432349	-1195.14
0.182095	-0.0518455	-1191.9
0.191882	-0.0680957	-1191.9
0.193367	-0.118776	-1191.9
0.148185	-0.126616	-1191.9
0.211975	-0.114851	-1195.14
0.239837	-0.114792	-1191.9
0.255982	-0.0913069	-1198.38
0.310512	-0.0781256	-1191.9
0.301084	-0.025467	-1195.14
0.327383	-0.0495197	-1188.66
0.355763	-0.0637158	-1188.66
0.406693	-0.210332	-1195.14
0.383664	-0.390838	-1198.38
0.35735	-0.368993	-1198.38
0.250065	-0.352543	-1195.14
0.23007	-0.362592	-1191.9
0.215656	-0.345081	-1188.66
0.172611	-0.271922	-1185.42
0.18649	0.0590146	-1195.14
0.220755	0.0346517	-1188.66
0.114614	-0.100836	-1191.9
0.0582826	-0.229374	-1188.66
-0.20483	0.125793	-1108.66
-0.140198	-0.0666463	-1111.9
-0.143091	-0.147874	-1111.9
-0.138172	-0.186381	-1108.66
-0.10477	-0.187165	-1111.9
-0.107404	-0.12098	-1115.14
-0.0406594	-0.0873819	-1115.14
-0.00849785	-0.0502102	-1108.66
-0.235628	0.0330096	-1111.9
0.0376539	-0.0123773	-1115.14
0.0447946	0.0173269	-1115.14
0.0285262	0.0287103	-1115.14
0.0295553	0.0559695	-1118.38
0.0488306	0.0894403	-1115.14
0.0353888	0.0897227	-1115.14
0.097387	0.148829	-1118.38
0.11328	0.155189	-1115.14
0.135262	0.133594	-1118.38
0.149152	0.140646	-1108.66
0.147897	0.121337	-1115.14
0.13275	0.11496	-1118.38
0.116921	0.0973544	-1115.14
0.102403	0.0592364	-1108.66
0.112073	0.0564852	-1108.66
0.121149	0.0284653	-1115.14
0.132227	0.019739	-1115.14
0.153175	0.0141028	-1111.9
0.151144	0.028585	-1111.9
0.167672	0.0350333	-1111.9
0.14427	0.0695001	-1111.9
0.185581	0.0415529	-1115.14
0.211427	0.0724379	-1115.14
0.211575	0.0826276	-1115.14
0.230966	0.0805216	-1115.14
0.243549	0.0803579	-1118.38
0.250554	0.0997468	-1118.38
0.242699	0.116799	-1115.14
0.222806	0.143648	-1118.38
0.20721	0.149921	-1118.38
0.202515	0.178799	-1115.14
0.266033	0.129051	-1115.14
0.287215	0.139548	-1111.9
0.286684	0.11078	-1115.14
0.316022	0.0813855	-1118.38
0.315962	0.0693949	-1115.14
0.327416	0.0351788	-1115.14
0.297291	0.0775314	-1118.38
0.260931	0.0271305	-1111.9
0.246567	0.03103	-1118.38
0.222858	0.0287788	-1111.9
0.220993	0.0110811	-1115.14
0.242674	0.0123248	-1115.14
0.196226	0.0031069	-1115.14
0.173875	-0.00083712	-1111.9
0.205615	-0.02922	-1111.9
0.217676	-0.0296036	-1108.66
0.163715	-0.0816327	-1115.14
0.139268	-0.057917	-1118.38
0.104374	-0.09769	-1118.38
0.221413	-0.068195	-1115.14
0.234807	-0.0805949	-1111.9
0.275157	-0.07967	-1111.9
0.278987	-0.0555677	-1118.38
0.264	-0.0288148	-1108.66
0.297842	-0.0505741	-1115.14
0.306976	-0.0378741	-1115.14
0.324774	-0.0474996	-1115.14
0.33244	-0.0329222	-1115.14
0.349302	-0.00944321	-1111.9
0.387668	0.0255207	-1118.38
0.280958	0.017367	-1111.9
0.37287	-0.0817871	-1115.14
0.260765	-0.150336	-1111.9
0.253268	-0.216658	-1108.66
0.31495	-0.111816	-1115.14
0.41768	-0.241282	-1118.38
0.321029	-0.383021	-1115.14
0.242157	-0.368425	-1111.9
0.370741	-0.185002	-1115.14
-0.227757	-0.158466	-1031.9
-0.177322	-0.0215282	-1025.42
-0.124904	-0.124016	-1035.14
-0.108454	-0.110492	-1028.66
-0.102825	-0.097985	-1025.42
-0.060047	-0.108435	-1028.66
-0.00748495	-0.0588226	-1035.14
-0.119525	-0.175111	-1035.14
-0.145318	-0.239505	-1031.9
0.111259	-0.277287	-1031.9
0.199751	-0.342041	-1028.66
0.202315	-0.332447	-1038.38
0.234644	-0.358154	-1035.14
0.250839	-0.374854	-1038.38
0.290724	-0.393147	-1031.9
0.390627	-0.395303	-1035.14
0.322272	-0.210146	-1038.38
0.395449	-0.161784	-1038.38
0.414989	-0.159428	-1031.9
0.391055	-0.130745	-1031.9
0.357907	-0.103166	-1038.38
0.345529	-0.145241	-1035.14
0.30747	-0.102742	-1031.9
0.26882	-0.10911	-1031.9
0.237986	-0.146445	-1031.9
0.248904	-0.148056	-1038.38
0.263072	-0.160798	-1038.38
0.26443	-0.216474	-1028.66
0.209713	-0.0488897	-1035.14
0.222573	-0.0310943	-1035.14
0.238641	-0.0255031	-1031.9
0.273354	-0.0160143	-1028.66
0.290501	-0.0288436	-1038.38
0.349754	-0.0621889	-1035.14
0.326624	-0.0240906	-1038.38
0.282254	0.00121419	-1031.9
0.26003	0.000975052	-1038.38
0.232525	0.0128442	-1028.66
0.226355	0.0474641	-1031.9
0.217172	0.0642847	-1031.9
0.230151	0.0641775	-1031.9
0.217925	0.0579395	-1038.38
0.258664	0.0774278	-1035.14
0.255398	0.0653674	-1031.9
0.275326	0.0674297	-1035.14
0.282627	0.0803097	-1031.9
0.281414	0.10757	-1031.9
0.294625	0.0982176	-1038.38
0.330626	0.0618135	-1038.38
0.322341	0.0459222	-1035.14
0.342644	0.0435995	-1031.9
0.332588	0.0780364	-1035.14
0.324165	0.134117	-1038.38
0.342193	0.16835	-1035.14
0.301544	0.190562	-1038.38
0.241463	0.157852	-1035.14
0.228086	0.125186	-1031.9
0.209864	0.126484	-1031.9
0.233298	0.0934859	-1035.14
0.169068	0.154035	-1031.9
0.150958	0.0924808	-1035.14
0.120549	0.15103	-1031.9
0.0914617	0.132091	-1035.14
0.0848557	0.178507	-1035.14
0.119674	0.0977907	-1031.9
0.09619	0.0841477	-1035.14
0.120716	0.0723639	-1035.14
0.137515	0.0738745	-1035.14
0.151321	0.0677405	-1038.38
0.163684	0.0668854	-1038.38
0.185769	0.068241	-1035.14
0.149376	0.0280204	-1031.9
0.139984	0.0017872	-1038.38
0.175039	-0.0117759	-1035.14
0.195658	-0.00852791	-1035.14
0.138262	-0.0445956	-1031.9
0.127777	-0.0614357	-1038.38
0.154323	-0.105665	-1038.38
0.064745	0.0221898	-1028.66
0.0565845	-0.00264507	-1035.14
0.0558325	-0.0153698	-1035.14
0.0513306	0.0154916	-1031.9
0.0148623	0.0458081	-1035.14
-0.00805396	0.0515707	-1035.14
0.0218398	-0.0113891	-1038.38
0.104207	0.0331698	-1038.38
0.0833003	0.0364978	-1038.38
0.191403	0.174902	-1035.14
-0.320386	0.196779	-945.42
-0.265861	0.209804	-945.42
0.183279	0.182389	-948.66
0.201364	0.146806	-951.9
0.228117	0.128585	-955.14
0.286187	0.171605	-948.66
0.277059	0.204526	-951.9
0.31883	0.174226	-951.9
0.328036	0.162375	-948.66
0.286464	0.132195	-955.14
0.293183	0.117601	-955.14
0.290056	0.101489	-948.66
0.327072	0.0957282	-958.38
0.367357	0.0922416	-951.9
0.383777	0.097809	-948.66
0.344937	0.043919	-955.14
0.274354	0.0523718	-948.66
0.238267	0.0514788	-955.14
0.247243	0.071669	-951.9
0.213381	0.0909195	-958.38
0.227378	0.0954277	-958.38
0.130976	0.105113	-958.38
0.110425	0.122871	-948.66
0.107565	0.143215	-948.66
0.104333	0.159046	-951.9
0.0907589	0.141346	-948.66
0.0609909	0.096372	-955.14
0.0920381	0.0900951	-955.14
0.110933	0.0790188	-948.66
0.121375	0.0771419	-955.14
0.125008	0.090798	-951.9
0.139396	0.067474	-951.9
0.100652	0.0437069	-951.9
0.0744106	-0.00660183	-945.42
0.00473233	0.0660177	-951.9
-0.014784	0.0174782	-958.38
-0.0598473	0.0237285	-948.66
-0.0491016	0.0704131	-945.42
-0.0593827	-0.0607707	-951.9
-0.0912459	-0.106388	-945.42
-0.186448	-0.146241	-948.66
-0.177971	-0.181084	-948.66
-0.13776	-0.207863	-948.66
-0.158731	-0.184512	-945.42
0.00553109	-0.0826507	-945.42
0.0173385	-0.0400849	-955.14
0.0582136	-0.110046	-948.66
0.157079	-0.0711036	-948.66
0.133146	-0.285702	-955.14
0.217057	-0.201689	-951.9
0.257793	-0.222722	-951.9
0.220263	-0.261193	-948.66
0.217975	-0.315051	-955.14
0.205854	-0.319364	-948.66
0.268168	-0.300324	-951.9
0.320639	-0.328051	-958.38
0.305052	-0.368957	-951.9
0.35767	-0.38315	-951.9
0.348569	-0.32006	-958.38
0.320795	-0.282129	-958.38
0.320572	-0.184753	-958.38
0.312599	-0.20462	-958.38
0.359104	-0.129111	-955.14
0.316158	-0.223961	-948.66
0.392193	-0.187137	-951.9
0.396393	-0.221983	-958.38
0.321936	-0.0950309	-951.9
0.303804	-0.0782997	-948.66
0.282947	-0.092104	-948.66
0.263036	-0.0732212	-951.9
0.251224	-0.104526	-948.66
0.22792	-0.0880141	-958.38
0.249632	-0.0705719	-958.38
0.235847	-0.0601166	-951.9
0.21279	-0.023545	-945.42
0.175494	-0.0232078	-948.66
0.240251	-0.0232228	-948.66
0.244298	-0.0152302	-958.38
0.26091	-0.00365978	-955.14
0.288697	0.00881859	-948.66
0.291673	-0.0300157	-948.66
0.319359	-0.0232732	-951.9
0.32753	-0.0392384	-951.9
0.336538	-0.0463935	-955.14
0.369586	-0.0527403	-958.38
0.412399	-0.0352823	-958.38
0.416951	9.9154e-05	-951.9
0.241942	0.0177099	-945.42
0.194262	0.045713	-945.42
0.177966	0.0538464	-955.14
0.157221	-0.0312717	-945.42
-0.120053	-0.0362399	-871.9
-0.0325036	-0.0557688	-878.38
-0.107323	-0.125186	-878.38
-0.0732992	-0.146409	-875.14
-0.0735556	-0.164657	-865.42
-0.112845	-0.202548	-871.9
-0.219954	-0.197697	-876.745
-0.15492	-0.262567	-875.14
-0.137491	-0.257662	-871.9
-0.0330052	0.0349417	-875.14
0.0497423	-0.000931054	-871.9
0.120508	-0.0233677	-868.66
0.150744	-0.0246748	-878.38
0.169959	-0.0701832	-875.14
0.193961	-0.000839009	-868.66
0.204265	0.0142954	-868.66
0.180129	0.017145	-875.14
0.160546	0.0381728	-878.38
0.128835	0.0633769	-871.9
0.126952	0.0476408	-878.38
0.111056	0.0555087	-868.66
0.108876	0.0453336	-868.66
0.0737249	0.066661	-871.9
0.088271	0.0848967	-875.14
0.05948	0.0979377	-875.14
0.112782	0.0788322	-868.66
0.0741179	0.173515	-871.9
0.16693	0.179041	-878.38
0.137034	0.234433	-871.9
0.263075	0.246674	-877.629
0.286759	0.2161	-873.12
0.289706	0.193922	-877.048
0.342967	0.221999	-871.694
0.288345	0.151442	-877.252
0.274408	0.133281	-876.185
0.271994	0.112784	-875.864
0.241478	0.120945	-878.117
0.247101	0.138393	-877.652
0.199579	0.0936664	-875.14
0.207189	0.0689311	-868.66
0.198221	0.0526753	-875.14
0.22044	0.0599172	-868.66
0.234358	0.0409823	-875.14
0.234413	0.0594706	-878.38
0.241123	0.0833148	-875.14
0.285561	0.0599041	-877.981
0.307081	0.0983354	-877.957
0.332238	0.0215262	-875.622
0.319762	-0.0114456	-876.571
0.31976	-0.0294878	-878.195
0.337893	-0.0215973	-873.929
0.232617	-0.00744309	-878.38
0.246909	-0.0536249	-875.14
0.265012	-0.0576619	-870.802
0.250031	-0.0813862	-871.9
0.227359	-0.0404864	-878.38
0.224709	-0.169087	-868.66
0.239284	-0.17623	-878.38
0.289209	-0.176097	-866.959
0.299147	-0.195136	-876.051
0.302413	-0.209558	-876.897
0.344542	-0.210217	-875.99
0.345039	-0.23211	-876.938
0.312004	-0.236744	-876.691
0.211816	-0.363482	-876.997
-0.200474	0.0118922	-791.9
-0.0942008	0.0368413	-785.42
-0.0557601	0.0913372	-798.38
-0.00616283	0.0526429	-785.42
0.00109924	-0.0593306	-795.14
-0.0436776	-0.080576	-788.66
-0.0944089	-0.132045	-795.14
-0.124923	-0.144068	-785.42
-0.136369	-0.13506	-791.9
-0.153459	-0.160079	-785.42
-0.13166	-0.170793	-791.9
-0.186933	-0.22524	-785.42
-0.17909	-0.260641	-791.9
-0.114646	-0.204741	-788.66
-0.125352	-0.186654	-795.14
-0.100257	-0.195021	-791.9
-0.081103	-0.176518	-791.9
0.058562	0.124958	-788.66
0.0968731	0.159295	-791.9
0.0755951	0.185497	-788.66
0.141503	0.250086	-791.9
0.203566	0.218511	-798.38
0.240638	0.170448	-795.14
0.225175	0.137368	-785.42
0.26202	0.154318	-795.14
0.310649	0.183491	-795.14
0.329714	0.187736	-791.9
0.325037	0.0289969	-788.66
0.347928	0.0072318	-798.38
0.30779	-0.0157837	-791.9
0.280558	0.0958451	-795.14
0.233377	0.0780875	-791.9
0.217853	0.0691247	-785.42
0.189027	0.0920966	-795.14
0.162145	0.0967053	-795.14
0.166865	0.0752359	-791.9
0.172747	0.0783617	-788.66
0.180747	0.078394	-791.9
0.188508	0.0668055	-795.14
0.138022	0.139556	-795.14
0.124355	0.0456294	-798.38
0.139057	0.0347303	-791.9
0.133856	0.0107122	-788.66
0.167153	-0.0411562	-791.9
0.200452	-0.0596812	-795.14
0.238663	-0.0624145	-798.38
0.242038	-0.042115	-788.66
0.264366	-0.0495883	-791.9
0.27011	-0.0195611	-788.66
0.243649	-0.0713733	-795.14
0.208729	-0.03476	-791.9
0.220083	-0.00282135	-798.38
0.202723	0.00513095	-785.42
0.185521	0.0275192	-788.66
0.204139	0.0420303	-785.42
0.238	0.00980155	-795.14
0.391451	-0.0497545	-795.14
0.285705	-0.198987	-788.66
0.245222	-0.313212	-785.42
0.436236	-0.268618	-785.42
0.266506	-0.379696	-791.9
0.272634	-0.40293	-791.9
0.275772	-0.116598	-798.38
0.296314	-0.109062	-798.38
-0.315113	0.208194	-711.895
-0.092333	-0.108993	-711.898
-0.0894551	-0.127023	-711.898
-0.0409868	-0.128945	-715.139
-0.119969	-0.203219	-708.658
-0.148569	-0.216286	-708.657
-0.129386	-0.0759947	-708.658
-0.0995984	-0.174116	-715.138
-0.080321	-0.136017	-715.138
0.191927	-0.126954	-708.663
0.242643	-0.113549	-715.144
0.233105	-0.189369	-715.143
0.294509	-0.145145	-715.144
0.335878	-0.218398	-718.385
0.299642	-0.277621	-705.424
0.277111	-0.311787	-711.903
0.260636	-0.305967	-715.143
0.352491	-0.0334618	-708.665
0.314372	-0.0334903	-715.145
0.276639	-0.0585265	-715.144
0.23995	-0.345978	-715.143
0.150759	-0.0520097	-715.142
0.200724	-0.0503012	-708.663
0.194226	-0.0177948	-718.383
0.182915	-0.0169994	-708.663
0.179761	-0.005332	-711.903
0.204908	0.0190294	-711.903
0.227498	0.024352	-718.384
0.266707	0.0322823	-705.424
0.273417	0.0120949	-718.384
0.292988	0.0472846	-711.905
0.259296	0.0604537	-718.384
0.262423	0.0727629	-715.144
0.271083	0.0929778	-705.425
0.236128	0.0709539	-708.664
0.197853	0.0498228	-718.383
0.178609	0.043642	-718.383
0.106945	0.0637746	-715.142
0.162623	0.0937403	-711.903
0.132252	0.105137	-711.902
0.131115	0.140336	-718.383
0.0802192	0.12795	-715.142
0.0628465	0.0918494	-708.661
0.0977011	0.227372	-718.382
0.165467	0.201051	-711.903
0.178973	0.201059	-708.663
0.206398	0.173827	-708.664
0.309165	0.149335	-711.905
0.235903	0.113181	-711.904
0.271207	0.166008	-715.145
0.262469	0.357726	-708.665
0.286905	-0.325502	-628.66
0.29515	-0.296197	-631.9
0.232567	-0.314008	-631.9
0.227005	-0.300933	-628.66
0.205205	-0.319728	-635.14
0.179236	-0.343664	-631.9
0.268386	-0.393698	-625.42
0.258001	-0.376479	-628.66
0.473989	-0.309024	-625.42
0.387242	-0.363174	-638.38
0.409828	-0.361037	-631.9
0.468969	-0.361459	-631.9
0.399569	-0.308041	-635.14
0.393739	-0.283787	-635.14
0.435995	-0.280522	-635.14
0.405274	-0.146972	-625.42
0.320833	-0.112491	-635.14
0.375328	-0.0790554	-631.9
0.341539	-0.0108196	-625.42
0.354701	-0.00384853	-638.38
0.333935	0.0107252	-635.14
0.318537	-0.0652503	-625.42
0.261182	-0.0374065	-625.42
0.224489	-0.053746	-628.66
0.216319	-0.0614179	-625.42
0.244302	-0.0987428	-631.9
0.248114	-0.129255	-635.14
0.263556	-0.149909	-631.9
0.259268	-0.168125	-631.9
0.227225	-0.237698	-628.66
0.155898	-0.185783	-625.42
0.133747	-0.0631143	-631.9
0.166962	-0.0749925	-628.66
0.182526	-0.0607011	-625.42
0.196153	-0.0960577	-631.9
0.136984	-0.016229	-635.14
0.123217	0.000236859	-638.38
0.12026	0.0125837	-625.42
0.130652	0.01911	-631.9
0.150409	0.0243266	-628.66
0.177701	0.0313423	-635.14
0.156743	0.0582065	-625.42
0.13391	0.0518295	-625.42
0.11159	0.0380722	-628.66
0.109387	0.0454895	-625.42
0.104283	0.0570219	-635.14
0.00801682	0.0502899	-625.42
-0.139738	0.0997192	-631.9
0.198936	0.223935	-631.9
0.181789	0.219275	-625.42
0.206954	0.0965276	-631.9
0.092987	0.123956	-631.9
0.0995689	0.140268	-625.42
0.0617462	0.220432	-635.14
0.227538	0.118305	-638.38
0.248949	0.0914322	-625.42
0.262146	0.087213	-628.66
0.275063	0.0685087	-625.42
0.289128	0.0711476	-628.66
0.26736	0.0394487	-625.42
0.276557	0.0326146	-635.14
0.283553	0.0123207	-631.9
0.306079	0.018213	-635.14
0.233134	0.0027413	-628.66
0.259576	0.00805626	-635.14
0.360482	-0.151014	-625.42
0.299433	-0.279646	-631.9
0.162835	0.201146	-628.66
0.15214	0.217591	-635.14
0.0409534	0.0461295	-625.42
-0.0674651	-0.097672	-638.38
-0.0450687	-0.107353	-628.66
-0.102848	-0.110303	-631.9
-0.11254	-0.150188	-631.9
-0.107309	-0.174382	-635.14
-0.101265	-0.218458	-628.66
-0.0911479	-0.208515	-631.9
-0.131345	-0.205077	-635.14
-0.14857	-0.187418	-631.9
-0.180971	-0.172296	-628.66
-0.15892	-0.0988911	-625.42
-0.147868	-0.139415	-551.9
-0.0939296	-0.129445	-545.42
0.17176	-0.0437915	-548.66
0.178467	-0.0298556	-548.66
0.162001	-0.0141437	-548.66
0.150036	0.0102691	-545.42
0.189817	0.0675082	-551.9
0.0806481	0.124576	-551.9
0.0739607	0.112371	-555.14
0.110705	0.167214	-555.14
0.116405	0.162996	-555.14
0.121223	0.199093	-555.14
0.127586	0.196332	-555.14
0.146014	0.248392	-555.14
0.212375	0.161915	-555.14
0.175083	0.158778	-551.9
0.177822	0.112931	-555.14
0.203795	0.111266	-555.14
0.233768	0.00396119	-555.14
0.254832	-0.00141269	-548.66
0.337334	0.000263491	-557.061
0.330118	0.0283998	-552.268
0.0850963	0.016174	-555.14
0.095288	0.000387769	-555.14
0.0590848	0.0134628	-555.14
0.0435722	0.0124291	-545.42
0.0161337	-0.0282349	-555.14
0.00661339	-0.0452747	-551.9
0.239576	-0.241725	-549.495
0.231846	-0.262411	-551.666
0.212559	-0.359383	-548.481
0.225098	-0.358723	-546.999
0.232931	-0.343967	-544.397
0.249075	-0.408409	-548.963
0.310446	-0.382428	-548.075
0.42307	-0.152474	-542.246
0.116051	0.114629	-555.14
0.130066	0.115622	-555.14
0.240068	0.213105	-551.9
0.329592	0.190057	-475.14
0.39852	0.203896	-468.66
0.336987	0.155243	-468.66
0.272655	0.144618	-475.14
0.250146	0.133831	-475.14
0.221628	0.159136	-468.66
0.201883	0.110086	-468.66
0.193419	0.228398	-475.14
0.173769	0.287709	-465.42
0.235847	0.210719	-475.14
0.295021	0.232664	-471.9
0.110602	0.153466	-478.38
0.0639426	0.141575	-468.66
0.130846	0.0627742	-471.9
0.158274	0.0487106	-478.38
0.171393	0.023676	-468.66
0.16385	0.00903921	-468.66
0.180659	0.00880332	-475.14
0.106111	0.020536	-475.14
0.0700882	-0.00824869	-475.14
-0.0802307	-0.0836705	-471.9
-0.135572	-0.151872	-475.14
-0.174368	0.0815194	-475.14
-0.185751	-0.0479039	-471.9
-0.16336	-0.172579	-471.9
-0.152731	-0.191252	-471.9
-0.127337	-0.233508	-475.14
-0.109623	-0.20843	-471.9
-0.109756	-0.186208	-471.9
-0.165722	-0.235805	-468.66
-0.0354658	-0.0920761	-475.14
0.133957	-0.247156	-475.14
0.176311	-0.224116	-475.14
0.198247	-0.154344	-475.14
0.255645	-0.279107	-471.9
0.28798	-0.29983	-475.14
0.371265	-0.129852	-475.14
0.294413	-0.0462901	-468.66
0.251793	-0.122114	-468.66
0.243331	-0.110807	-468.66
0.214805	-0.0647342	-475.14
0.18155	-0.016963	-475.14
0.182928	-0.118537	-471.9
0.224459	0.0815049	-475.14
0.22954	0.0909959	-468.66
0.0932398	0.0952298	-475.14
0.304449	0.0865739	-475.14
0.28091	0.0860171	-471.9
0.289229	0.0791217	-475.14
0.348155	0.125401	-475.14
0.252615	0.0313176	-471.9
0.293578	-0.00219559	-475.14
0.318889	0.00592858	-475.14
0.254508	-0.00245721	-475.14
0.223415	-0.383733	-471.9
0.223466	-0.405508	-471.9
0.365712	-0.164211	-468.66
-0.262791	-0.316292	-392.212
-0.16979	-0.200227	-385.407
-0.187611	-0.200793	-385.981
-0.163353	-0.207247	-389.444
-0.127789	-0.174359	-388.879
-0.0983809	-0.17809	-390.245
-0.051914	-0.113857	-389.1
-0.0503649	-0.0912986	-386.282
-0.0230604	-0.0198815	-382.984
-0.160182	-0.0449731	-385.803
0.0506952	0.0628323	-393.674
0.087218	0.0718956	-392.956
0.095825	0.057395	-390.76
0.119905	0.100708	-397.646
0.133057	0.101558	-393.819
0.0940623	0.12256	-397.852
0.0992548	0.16379	-396.428
0.118528	0.223498	-392.824
0.141228	0.15194	-393.873
0.180895	0.183074	-391.385
0.215368	0.170675	-392.842
0.207753	0.186691	-397.211
0.195354	0.185482	-396.439
0.26407	0.226055	-395.541
0.215844	0.416227	-387.818
0.306898	0.150759	-393.151
0.22875	0.106154	-392.827
0.239824	0.11225	-393.395
0.251131	0.0875203	-390.724
0.227617	0.0604035	-396.727
0.219685	0.0740737	-396.911
0.18439	0.104786	-382.463
0.155223	0.045128	-392.81
0.165879	0.0198494	-392.969
0.187483	0.00525654	-392.125
0.184714	-0.0349121	-384.067
0.212513	-0.0597105	-392.437
0.239771	-0.00326334	-382.719
0.21377	0.0134021	-393.147
0.214458	0.0268516	-390.542
0.225695	0.0366551	-397.95
0.255967	0.0467192	-396.47
0.256939	-0.00118123	-391.749
0.256633	-0.0266099	-394.021
0.289314	-0.0309846	-388.699
0.307311	0.0296829	-391.572
0.34228	0.0191928	-392.856
0.352989	-0.0384353	-391.613
0.360358	-0.0430174	-396.12
0.366564	-0.0617617	-384.639
0.391081	-0.0497604	-384.746
0.363977	-0.110329	-394.33
0.246936	-0.104226	-394.263
0.235049	-0.0796077	-385.156
0.188113	-0.118833	-388.934
0.193721	-0.374397	-393.44
0.247442	-0.319641	-390.475
0.174762	-0.239478	-391.715
0.20193	-0.336894	-395.726
-0.062102	-0.116255	-311.9
-0.200595	0.0520804	-311.9
-0.264636	0.157748	-308.66
-0.184309	-0.147179	-308.66
-0.116735	-0.177304	-311.9
-0.129576	-0.235322	-315.14
-0.108233	-0.220016	-308.66
-0.0918979	-0.164037	-315.14
-0.0996624	-0.181883	-315.14
0.231469	-0.214138	-311.9
0.218105	-0.343919	-311.9
0.350979	-0.214941	-318.38
0.280452	-0.104547	-315.14
0.269591	-0.111174	-308.66
0.251469	-0.0846248	-305.42
0.232833	-0.0848226	-305.42
0.173885	-0.0567473	-308.66
0.186412	-0.0708399	-315.14
0.231629	-0.041258	-315.14
0.241669	-0.0130045	-311.9
0.221742	0.00166256	-315.14
0.231297	0.0105813	-315.14
0.276138	0.0294716	-311.9
0.313727	-0.0384336	-315.14
0.293651	0.0888889	-315.14
0.313537	0.0817359	-315.14
0.328228	0.0618294	-308.66
0.0421372	0.175006	-315.14
0.0333576	0.119971	-308.66
0.0922956	0.159531	-315.14
0.10943	0.141181	-308.66
0.157396	0.134462	-315.14
0.192725	0.158386	-315.14
0.168588	0.100178	-315.14
0.200194	0.122439	-315.14
0.236299	0.115821	-308.66
0.245992	0.115271	-308.66
0.244798	0.0963459	-315.14
0.221509	0.0757245	-311.9
0.134412	0.0767564	-318.38
0.117955	0.0512845	-315.14
0.143532	0.0141322	-315.14
0.128757	0.031732	-308.66
0.10362	-0.025048	-315.14
0.0535186	0.0215593	-315.14
0.0435768	0.0484976	-315.14
0.144392	-0.0361761	-315.14
0.189663	-0.0232782	-315.14
0.187954	-0.00659426	-305.42
0.402825	-0.0426616	-315.14
0.197151	0.0669314	-311.9
0.258808	0.0524109	-311.9
0.248324	0.0614268	-315.14
0.213314	0.042541	-311.9
0.20394	0.0325543	-308.66
0.159515	-0.0151383	-311.9
0.175332	0.0207	-308.66
0.165089	0.168147	-308.66
0.288187	-0.0453368	-305.42
0.267752	0.0998767	-311.9
-0.262957	0.192783	-231.9
-0.159803	-0.211595	-228.66
-0.172187	-0.22498	-231.9
-0.158938	-0.272793	-231.9
-0.0378039	-0.109166	-231.9
0.208366	-0.176357	-235.14
-0.261384	0.010882	-225.42
-0.383209	0.0385542	-225.42
0.205631	0.0219181	-231.9
0.113523	0.0706835	-235.14
0.0666824	0.116738	-238.38
0.134992	0.159194	-228.66
0.0683011	0.0433296	-231.9
0.034459	0.00858685	-235.14
0.147687	0.0332018	-225.42
0.146501	-0.00538657	-225.42
0.160649	0.0490126	-228.66
0.156989	0.0681159	-231.9
0.200549	0.0488567	-235.14
0.255835	0.0729011	-225.42
0.263801	0.0775416	-231.9
0.268233	0.145989	-231.9
0.25566	0.149119	-225.42
0.30168	0.140373	-225.42
0.313892	0.0950708	-228.66
0.331878	0.0869671	-228.66
0.346767	0.0683358	-231.9
0.304075	0.0636601	-235.14
0.314484	0.0580021	-231.9
0.311261	0.0264806	-231.9
0.27133	-0.0552008	-231.9
0.25478	-0.128891	-231.9
0.332571	-0.0913002	-228.66
0.285514	-0.101787	-231.9
0.290445	-0.0794857	-225.42
0.323056	-0.289418	-235.14
-0.164331	-0.18528	-148.66
-0.127272	-0.134541	-145.42
-0.0117464	-0.0710101	-155.14
-0.10591	-0.229688	-158.38
0.283321	-0.231402	-155.14
0.282	-0.185997	-158.38
0.326914	-0.120554	-158.38
0.351662	-0.0692288	-158.38
0.306165	-0.0244483	-148.66
0.324552	0.0315842	-158.38
0.405783	-0.0114425	-158.38
0.479315	-0.116557	-148.66
0.232576	-0.100736	-155.14
0.23298	-0.0266196	-158.38
0.277372	-0.0187144	-151.9
0.235073	0.0479576	-151.9
0.233615	0.0588448	-151.9
0.265767	0.0681501	-155.14
0.288594	0.0718332	-151.9
0.295661	0.0998755	-158.38
0.296996	0.135666	-155.14
0.33428	0.149479	-155.14
0.220818	0.136543	-148.66
0.193381	0.154008	-158.38
0.181034	0.123521	-148.66
0.197392	0.102459	-151.9
0.191673	0.0892159	-148.66
0.179406	0.0904209	-158.38
0.222714	0.193226	-155.14
0.156898	0.212539	-151.9
0.136053	0.208072	-158.38
0.13488	0.163498	-158.38
0.151752	0.157978	-158.38
0.0996747	0.200978	-158.38
0.10302	0.151503	-148.66
0.115354	0.103551	-158.38
0.12769	0.111091	-158.38
0.123901	0.0673283	-155.14
0.103705	0.0689464	-155.14
0.135529	0.0701526	-158.38
0.0450342	0.105492	-155.14
0.039152	0.0882	-151.9
0.123889	0.228969	-148.66
0.159632	0.039952	-158.38
0.164641	-0.00882779	-158.38
0.153769	0.0132206	-148.66
0.183729	0.0408567	-158.38
0.12817	0.0448004	-158.38
0.00726329	0.048425	-155.14
-0.12165	-0.126769	-78.38
-0.0897642	-0.0608301	-71.9
-0.0560493	-0.0649535	-71.9
-0.207075	0.0302167	-75.14
-0.0458873	0.355478	-71.9
-0.361668	0.169581	-75.14
-0.259546	-0.0613498	-68.66
-0.168667	-0.236165	-71.9
-0.133226	-0.225988	-75.14
-0.102601	-0.186815	-75.14
0.203602	-0.297993	-78.38
0.31073	-0.262467	-78.38
0.440187	-0.183196	-78.38
0.315708	-0.102258	-75.14
0.300646	-0.0939273	-75.14
0.316571	-0.0523584	-75.14
0.253778	-0.0563604	-78.38
0.228424	-0.0181405	-78.38
0.237182	-0.0107713	-78.38
0.249402	-0.00928939	-75.14
0.259878	-0.00501848	-78.38
0.209529	0.0289346	-78.38
0.159608	0.0381182	-78.38
0.182586	0.0885411	-78.38
0.319138	0.178611	-75.14
0.13718	0.0760932	-78.38
0.111107	0.0884544	-78.38
0.127702	0.0471538	-78.38
0.23731	-0.0912207	-78.38
0.363851	-0.116952	-78.38
0.187647	0.15212	-71.9
0.190921	0.211478	-71.9
0.0814769	0.181918	-75.14
-0.0350243	0.225666	-68.66
-0.390882	-0.00335248	-75.14
0.29674	-0.168381	-75.14
0.210328	-0.135669	-78.38
-0.260329	-0.417553	-75.14
-0.287357	0.0377964	4.86
-0.148431	0.0175798	4.86
-0.140516	-0.142702	1.62
-0.186489	-0.184111	4.86
-0.104922	-0.18048	8.1
-0.152589	-0.236704	4.86
-0.159259	-0.255244	8.1
-0.18341	-0.2733	11.34
-0.0805291	0.145865	1.62
-0.119855	0.10262	11.34
0.00456579	0.105652	1.62
0.0775674	0.161641	4.86
0.121252	0.0254985	1.62
0.112976	-0.0895213	4.86
0.0723221	-0.141618	1.62
0.208042	-0.00936966	4.86
0.217424	0.22827	4.86
0.201596	0.174234	11.34
0.232846	0.118281	1.62
0.227613	0.107437	1.62
0.196624	0.11027	11.34
0.245682	0.0825718	1.62
0.242751	0.061369	4.86
0.234947	0.0472742	8.1
0.192896	0.0767847	1.62
0.192765	0.0505967	4.86
0.177427	0.0313348	1.62
0.27705	0.0342091	1.62
0.298031	0.0747135	1.62
0.327466	0.0205795	1.62
0.257284	0.00161898	1.62
0.320171	-0.120739	1.62
0.340427	-0.154223	4.86
0.255785	-0.345782	1.62
0.207478	-0.334895	1.62
0.379276	-0.217519	1.62
-0.199457	-0.216422	91.34
-0.142594	-0.223649	84.86
-0.134369	-0.224347	84.86
-0.090103	-0.190456	94.58
-0.0673487	-0.136393	84.86
0.131869	-0.273159	91.34
0.214951	-0.416481	84.86
0.313537	-0.229247	84.86
0.427169	-0.221872	81.62
0.453691	-0.200072	84.86
0.463544	-0.185819	81.62
0.435726	-0.296877	81.62
0.312869	-0.384574	88.1
0.263378	-0.350878	91.34
0.320774	-0.157906	81.62
[truncated: 337 more rows]

## Sheet: Sheet2
0.333888	-0.300263	-2315.14
0.296087	-0.235989	-2068.66
0.280167	-0.254092	-1908.66
0.316611	-0.238514	-1825.42
0.369337	-0.251339	-1825.42
0.303247	-0.308352	-1831.9
0.317853	-0.22676	-1745.42
0.338352	-0.224344	-1751.9
0.349952	-0.339299	-1751.9
0.144816	-0.296876	-1748.66
0.308878	-0.283543	-1668.66
0.352375	-0.251546	-1668.66
0.396263	-0.25208	-1668.66
0.368425	-0.331688	-1675.14
0.268414	-0.301864	-1588.66
0.316415	-0.278106	-1588.66
0.304768	-0.326461	-1591.9
0.328655	-0.339097	-1588.66
0.281458	-0.21346	-1595.14
0.37283	-0.216411	-1588.66
0.34748	-0.32174	-1515.14
0.376081	-0.265799	-1515.14
0.388378	-0.328167	-1515.14
0.410247	-0.32654	-1515.14
0.291393	-0.292222	-1431.9
0.249777	-0.298914	-1438.38
0.353677	-0.28553	-1438.38
0.356923	-0.239731	-1438.38
0.329715	-0.270454	-1351.9
0.348985	-0.28	-1348.66
0.391286	-0.194848	-1355.14
0.345945	-0.185017	-1348.66
0.360606	-0.179856	-1348.66
0.334484	-0.197466	-1271.9
0.389266	-0.221492	-1268.66
0.339051	-0.296115	-1271.9
0.315841	-0.283205	-1268.66
0.306214	-0.355806	-1271.9
0.28208	-0.34114	-1275.14
0.335093	-0.234996	-1191.9
0.34973	-0.225187	-1195.14
0.36948	-0.261618	-1195.14
0.385801	-0.23856	-1195.14
0.272051	-0.25745	-1195.14
0.273928	-0.286816	-1191.9
0.313181	-0.291281	-1191.9
0.341143	-0.310991	-1191.9
0.309552	-0.313118	-1198.38
0.277273	-0.32408	-1188.66
0.316117	-0.245127	-1191.9
0.292838	-0.153832	-1111.9
0.391606	-0.236079	-1118.38
0.379746	-0.349322	-1115.14
0.303793	-0.284084	-1111.9
0.309562	-0.346802	-1115.14
0.391299	-0.13126	-1031.9
0.358235	-0.101056	-1035.14
0.392576	-0.254141	-1035.14
0.324374	-0.323086	-1035.14
0.362476	-0.345753	-1031.9
0.336875	-0.239484	-1035.14
0.413098	-0.355613	-1031.9
0.407586	-0.356869	-951.9
0.350757	-0.212421	-951.9
0.363774	-0.189162	-877.648
0.324968	-0.271073	-871.9
0.383607	-0.400448	-875.935
0.351107	-0.395258	-871.255
0.319559	-0.218124	-791.9
0.354314	-0.225169	-785.42
0.371516	-0.266365	-791.9
0.33492	-0.246995	-795.14
0.321644	-0.303744	-785.42
0.417688	-0.38864	-795.14
0.433467	-0.385348	-791.9
0.373104	-0.240856	-715.145
0.325796	-0.153446	-711.905
0.340796	-0.31921	-711.904
0.404549	-0.38578	-711.905
0.355648	-0.188507	-635.14
0.369662	-0.228944	-631.9
0.350252	-0.256168	-628.66
0.311689	-0.227502	-628.66
0.280002	-0.290127	-631.9
0.424436	-0.252415	-625.42
0.407409	-0.413673	-628.66
0.302503	-0.120614	-548.66
0.319001	-0.0688809	-550.821
0.362974	-0.184234	-551.9
0.372031	-0.2912	-548.66
0.379273	-0.302636	-542.962
0.383037	-0.341018	-547.823
0.378976	-0.338737	-475.14
0.381727	-0.185565	-471.9
0.43658	-0.386309	-391.406
0.43249	-0.362064	-394.779
0.345854	-0.321042	-315.14
0.333505	-0.236382	-158.38
0.324015	-0.0814717	-155.14
0.357005	-0.273023	-78.38
0.36326	-0.152405	-78.38
0.383849	-0.166048	-78.38
0.366063	-0.420824	1.62
0.322611	-0.331928	1.62
0.389279	-0.185432	1.62
0.392357	-0.296449	1.62
0.378468	-0.318877	81.62
0.332278	-0.332123	168.1
0.345836	-0.29023	248.1
0.292085	-0.291547	321.62
