# Supplementary material for: Spinal premotor interneurons controlling antagonistic muscles are spatially intermingled
Source: eLife. 2022 Dec 13;11:e81976. doi: 10.7554/eLife.81976 (PMC9844990; doi:10.7554/eLife.81976)
Supplement: Figure 12—figure supplement 3—source data 3. [file elife-81976-fig12-figsupp3-data3.xlsx]

## Sheet: Sheet1
0.292878	-0.0415351	-2808.97
0.334643	-0.0659727	-2806.14
0.0203178	0.147808	-2806.42
-0.224564	-0.231848	-2807.38
0.343325	-0.15245	-2724.74
0.291572	-0.171975	-2724.82
0.181641	0.210638	-2721.49
-0.114892	0.156885	-2721.72
-0.259662	-0.126272	-2724.04
-0.277622	-0.255618	-2727.76
-0.126675	-0.306388	-2725.52
0.212307	0.124365	-2640.13
0.200693	0.0678088	-2633.86
0.243885	-0.0676117	-2622.91
0.287757	-0.114156	-2620.77
0.166183	0.0543196	-2634.85
0.0546742	0.0932523	-2644.13
0.0681652	-0.150966	-2628.74
-0.0891734	-0.128898	-2635.72
-0.166059	-0.165652	-2640.92
-0.220504	-0.357186	-2633.57
-0.158602	0.11523	-2658.47
-0.0220445	0.110242	-2650.23
-0.144363	0.199825	-2664.21
0.310009	-0.257774	-2588.02
0.163197	0.232668	-2560.82
-0.117388	0.00109311	-2543.12
-0.0873508	-0.103258	-2545.86
-0.195215	-0.303723	-2543.84
0.353594	-0.155232	-2592.36
0.339387	0.0201505	-2509.36
0.319991	-0.234725	-2513.38
0.236721	-0.239136	-2503.44
0.121178	0.0108673	-2481.75
0.140693	0.159997	-2479.6
0.15867	0.147439	-2482.15
0.208866	0.282801	-2484.12
-0.106575	0.0946045	-2452.82
-0.213157	-0.0228298	-2443.57
-0.176408	-0.211858	-2452.35
-0.248669	-0.252676	-2447.84
-0.27194	-0.3345	-2444.36
0.243827	0.0447896	-2496.38
0.14664	0.199244	-2481.92
-0.0886582	-0.108226	-2412.24
-0.160896	-0.106897	-2418.57
-0.132985	-0.269332	-2413.8
-0.176947	-0.345059	-2411.65
0.329142	-0.264257	-2371.61
0.327199	0.132707	-2385.75
0.347926	0.208427	-2387.5
0.187476	0.247971	-2400.17
0.12761	0.181793	-2408.98
0.269766	-0.0163991	-2333.28
0.450551	-0.0776063	-2310.38
0.0573998	0.0666592	-2337.71
0.0529586	0.0247042	-2322.54
-0.0397736	0.0355465	-2334.42
-0.12704	-0.0687966	-2314.17
-0.151117	-0.191607	-2305.82
-0.1126	-0.233547	-2308.15
-0.206555	-0.372461	-2295.45
-0.229279	-0.220545	-2309.48
0.325609	0.0646596	-2342.25
0.221342	0.0477214	-2334.21
-0.0897058	-0.162806	-2234.52
-0.0756326	-0.169045	-2236.24
-0.110082	-0.203889	-2238.81
-0.129398	-0.203194	-2236.47
-0.129975	-0.239484	-2236.49
-0.167348	-0.240052	-2231.96
-0.150169	0.0611056	-2226.62
-0.229446	0.221001	-2223.15
-0.0772355	-0.107834	-2235.9
0.12462	0.0486884	-2256.69
0.238826	0.0717321	-2273.86
0.314057	0.0194934	-2289.86
0.360283	0.0754955	-2291.98
0.359326	0.147799	-2291.62
0.399695	-0.0979668	-2293.9
0.298983	-0.177652	-2278.46
0.281451	-0.293343	-2286.55
0.229703	-0.348622	-2277.03
0.350605	-0.289616	-2294.97
0.313194	-0.215048	-2290.26
-0.139145	-0.0936509	-2156.95
-0.0743867	-0.0918949	-2158.84
-0.168627	-0.274412	-2159.14
-0.163243	-0.245071	-2162.06
-0.26392	0.0429816	-2169.41
0.0169509	-0.0664566	-2145.48
0.109214	-0.0430644	-2138.69
0.119126	-0.0346687	-2134.64
0.10324	0.0772014	-2139.11
0.144012	0.167686	-2136.1
0.183562	0.109573	-2136.53
0.252482	0.0573297	-2131.59
0.338375	0.105219	-2118.76
0.228392	-0.0425916	-2136.58
0.260761	-0.098276	-2134.99
0.300098	-0.27208	-2127.05
0.348526	-0.118	-2124.05
0.281462	-0.295505	-2138.25
-0.169078	-0.224843	-2164.93
0.363117	0.127676	-2092.24
0.376413	0.168556	-2086.34
0.222516	0.0958881	-2084.37
0.175412	0.123425	-2088.6
0.225965	0.0625641	-2084.93
0.237869	0.0865411	-2087.59
0.223653	0.00168273	-2085.78
0.336757	-0.0714018	-2088.65
0.379899	-0.103272	-2089.78
0.311188	-0.211298	-2089.36
0.271046	-0.356225	-2089.82
-0.139126	-0.249909	-2081.14
-0.0626445	-0.118743	-2084.12
0.392488	0.0751327	-2088.03
-0.147001	-0.339821	-2002.87
-0.145704	-0.288917	-2000.01
-0.218662	-0.342953	-1996.06
-0.0327089	-0.0146165	-2001.48
0.0722937	0.00953275	-2005.96
0.0622364	0.0303627	-2000.18
0.0922812	0.0223549	-2000.69
0.101867	0.0261783	-2003.62
0.135439	0.021349	-2006.96
0.153729	0.0253086	-2001.69
0.238666	0.269323	-2002.41
0.1774	0.0885865	-2001.9
0.177291	0.0717421	-2001.95
0.243668	0.0237588	-2003.16
0.328108	0.0543168	-2006.82
0.267111	-0.184059	-2003.92
0.241357	-0.162757	-2003.46
0.315318	-0.262252	-2006.3
0.360116	-0.127869	-2007.16
0.357575	-0.25881	-2006.67
0.288092	-0.359563	-2010.12
-0.138598	-0.220988	-1930.31
-0.0966582	-0.201138	-1932.07
-0.135549	-0.151368	-1927.63
-0.201427	-0.176476	-1929
0.103805	-0.137364	-1924.77
0.0801725	0.0546252	-1917.54
0.0953417	0.23831	-1907.49
0.0842673	0.172598	-1911.12
0.230336	0.243132	-1906.42
0.240049	0.149445	-1911.45
0.279164	0.178591	-1909.63
0.211974	0.0681178	-1916.02
0.165814	0.0934694	-1917.7
0.151185	0.119326	-1913.61
0.121779	0.116568	-1913.93
0.140479	0.0918268	-1915.16
0.221389	0.0519278	-1916.84
0.258126	-0.0309092	-1920.44
0.263778	-0.290578	-1928.74
0.24796	-0.333487	-1930.21
0.175763	0.118694	-1913.5
0.331725	-0.145042	-1923.66
0.300143	-0.254275	-1927.36
-0.220955	0.248553	-1827.75
-0.129849	0.0836581	-1833.06
-0.128908	-0.010398	-1835.05
-0.112792	-0.177345	-1838.69
-0.119669	-0.231766	-1839.26
-0.167429	-0.323869	-1838.4
-0.210125	-0.214761	-1837.18
0.0883427	0.150538	-1842.38
0.136462	0.221653	-1843.16
0.193953	0.264772	-1845.02
0.257397	0.222226	-1849.07
0.340691	0.0881874	-1856.12
0.250327	0.0360319	-1852.85
0.221376	0.0332871	-1851.5
0.222538	-0.00112102	-1852.31
0.27023	-0.00813272	-1854.75
0.261535	0.00793345	-1854.02
0.241915	-0.271235	-1857.35
0.226192	-0.356668	-1857.88
-0.199055	-0.240124	-1778.82
-0.219656	-0.154569	-1772.62
-0.169408	-0.245827	-1775.59
-0.111703	-0.179234	-1771.01
-0.0495794	-0.146704	-1775.1
-0.202852	-0.133633	-1777.64
-0.148669	0.0998747	-1773.6
0.0754132	0.0593389	-1761.95
0.0455491	0.0211758	-1768.62
0.0422524	-0.058518	-1766.81
0.0544745	-0.0221938	-1771.79
0.0944221	0.202618	-1764.97
0.110601	0.242212	-1764.08
0.157378	0.149356	-1764.71
0.197975	0.179746	-1766.32
0.254837	0.214278	-1759.24
0.13947	0.11327	-1762.79
0.318364	0.135968	-1756.57
0.336295	0.0968251	-1765.21
0.27715	-0.0563184	-1771.07
0.154877	-0.308468	-1770.15
0.273158	-0.345992	-1771.26
0.327684	-0.258408	-1763.88
0.308089	-0.243217	-1764.07
0.347944	-0.232855	-1766.06
0.364282	-0.0731597	-1769.74
0.356908	-0.127768	-1764.85
-0.145888	-0.243212	-1700.04
-0.158949	-0.317961	-1706.5
-0.226639	-0.252992	-1695.79
-0.111367	-0.152358	-1695.36
-0.102903	-0.222592	-1693.04
0.279423	0.26509	-1662.93
0.0946239	0.151943	-1674.24
0.138891	0.180728	-1669.31
0.14642	0.205997	-1673.3
0.164752	0.182084	-1671.76
-0.160504	0.134643	-1675.23
0.119169	-0.0560653	-1682.43
0.219182	0.00233352	-1681.89
0.279118	-0.0938948	-1682.35
0.335142	-0.0421382	-1690.9
0.276126	-0.131774	-1686.66
0.248498	-0.143511	-1684.61
0.20438	-0.310057	-1699.95
0.199625	-0.358506	-1699.12
0.145421	-0.319054	-1698.1
-0.0880473	-0.217924	-1695.44
0.0421279	0.0454945	-1686.63
0.106829	0.122899	-1675.84
0.0764288	0.183071	-1675.35
-0.132054	-0.0270444	-1603.97
-0.155772	-0.0873021	-1607.2
-0.152059	-0.18325	-1614.74
-0.179582	-0.234045	-1614.75
-0.200554	-0.234907	-1614.99
-0.127086	-0.26635	-1615.87
-0.105687	-0.231714	-1613.94
0.112604	0.204223	-1588.24
0.247798	0.192002	-1587.64
0.222942	0.147352	-1590.52
0.205604	0.148499	-1596.18
0.245748	0.123654	-1591.69
0.343627	0.269381	-1582.14
0.235723	0.0999895	-1593.19
0.354751	0.143341	-1589.46
0.213447	0.0475441	-1596.5
0.194828	-0.00496099	-1605.26
0.115996	0.0831053	-1595.35
0.263906	-0.2114	-1607.71
0.307423	-0.259448	-1614.88
0.385944	-0.265333	-1614.36
0.307097	-0.350815	-1615.94
0.266314	-0.332364	-1618.35
0.226852	-0.349298	-1619.45
0.116404	0.149551	-1591.43
-0.157115	-0.189676	-1516.78
-0.114802	-0.228425	-1519.69
-0.154536	-0.318116	-1515.23
-0.187786	-0.297012	-1515.01
-0.0269188	-0.0954542	-1519.82
0.0102491	-0.0344857	-1521.2
0.0205824	-0.0343603	-1521.36
0.0724801	0.0270111	-1522.88
0.0932524	0.105571	-1524.29
-0.104181	0.195431	-1522.63
0.149747	0.0777451	-1524.78
0.139286	0.105316	-1525
0.116009	0.0603248	-1524.02
0.210859	-0.187073	-1522.78
0.221587	-0.304577	-1521.77
0.261654	-0.34695	-1521.96
0.389418	-0.0672726	-1526.73
0.249297	0.185318	-1527.8
0.153717	0.234537	-1527.01
0.13857	0.259433	-1527.12
-0.263285	0.0904934	-1512.15
-0.140881	-0.164076	-1410.8
-0.118652	-0.217945	-1395.34
0.0648943	0.0378687	-1425.39
0.243805	0.140725	-1430.51
0.207003	0.152378	-1440.2
0.24108	0.235273	-1452.85
0.313815	0.156265	-1425.92
0.362176	0.104913	-1396.95
0.260513	0.106717	-1420.58
0.242425	0.0668499	-1403.48
0.138569	0.0885103	-1427.57
0.190894	-0.171116	-1357.95
0.306553	-0.236911	-1320.81
0.228759	-0.0605041	-1375.84
0.133481	0.21744	-1468.91
0.206346	0.257114	-1468.02
0.407125	-0.0800976	-1392.33
0.442125	-0.129859	-1387.43
0.160609	-0.147875	-1354.86
-0.00209159	-0.11927	-1336.51
0.127893	0.0988274	-1372.18
0.193585	0.0551646	-1379.11
0.153964	-0.00681768	-1367.79
0.227374	-0.0560257	-1376.33
0.341824	0.0704953	-1402.82
0.296118	0.146326	-1404.57
0.300902	0.20704	-1403
0.379997	0.221473	-1417.59
0.217411	0.171349	-1394.05
0.227147	0.112673	-1392.14
0.173382	0.197824	-1385.41
0.1064	0.217888	-1381.5
0.045824	0.224047	-1382.6
0.0402667	0.302718	-1384.3
0.115512	0.206629	-1378.75
0.0253168	0.0438505	-1361.58
-0.0636811	0.0296353	-1339.53
-0.135492	-0.14747	-1312.3
-0.254516	0.137744	-1326.64
-0.186308	0.0463134	-1324.03
-0.166971	-0.220228	-1306.51
-0.133187	-0.211423	-1312.09
-0.0920623	-0.186196	-1314.69
-0.116364	-0.274668	-1311.2
-0.149577	-0.264568	-1304.71
-0.18513	-0.250392	-1301.08
-0.152476	-0.272033	-1206.4
-0.20477	-0.131594	-1224.68
0.122391	0.0997445	-1301.06
0.245645	0.0908033	-1316.93
0.256812	0.0994774	-1322.75
0.24535	0.177477	-1334
0.127489	-0.328722	-1242.52
0.211372	-0.300934	-1255.14
0.278712	-0.357097	-1257.3
0.369602	-0.202612	-1293.02
0.246775	0.0261657	-1309.23
-0.206219	-0.177755	-1226.12
-0.15124	-0.215089	-1224.19
-0.113876	-0.280491	-1233.36
-0.054385	0.0689544	-1198.84
0.0232564	-0.00765998	-1202.13
0.0128709	0.0432095	-1198.54
0.06326	-0.0481244	-1203.2
0.118167	0.0207979	-1193.71
0.231321	0.0258444	-1189.16
0.294526	0.0659798	-1189.17
0.223028	0.158253	-1178.76
0.195607	-0.180845	-1206.67
0.227975	-0.198831	-1206.61
0.238087	-0.147252	-1197.44
0.211834	-0.31199	-1211.5
0.309782	-0.183243	-1199.85
0.22475	0.0941408	-1189.45
-0.209603	0.0878905	-1118.88
-0.175505	-0.212484	-1134.67
-0.149004	-0.191037	-1130.03
-0.124829	-0.231089	-1127.26
-0.242624	-0.313172	-1135.59
0.0188818	-0.177517	-1134.23
0.181391	-0.285636	-1147.22
0.320438	-0.367001	-1144.19
0.336726	-0.0621709	-1141.69
0.382294	-0.0839398	-1138.9
0.442849	-0.130139	-1146.94
0.43047	-0.179554	-1152.66
0.426439	-0.155664	-1151.91
0.277	-0.0787294	-1145.01
0.283979	-0.0191322	-1133.99
0.233144	0.0121984	-1141.13
0.209732	0.0267812	-1135.02
0.194355	-0.0835563	-1137.56
0.30776	0.0686008	-1136.87
0.223107	0.105384	-1128.02
0.210217	0.136703	-1131.42
0.181352	0.14827	-1125.24
0.225709	0.18564	-1125.47
0.249699	0.22952	-1129.66
0.319853	0.25549	-1131.11
0.349718	0.356394	-1123.92
0.219599	0.293237	-1126.57
0.0323116	-0.000372461	-1130.08
0.0254764	-0.0269776	-1130.55
0.112214	0.0931008	-1129.63
0.138387	0.0857219	-1135.59
0.121944	0.011963	-1137.48
0.104657	0.0099766	-1132.12
-0.226078	-0.100021	-1009.59
-0.183561	-0.223409	-998.757
-0.127822	-0.246636	-999.301
-0.109464	-0.251315	-1004.66
-0.138751	-0.180374	-1010.63
0.164742	0.0765584	-1049.35
0.136249	0.0473727	-1049.6
0.176842	-0.0233847	-1039.76
0.233894	-0.0596898	-1039.59
0.296821	-0.108712	-1033.74
0.424253	-0.22181	-1035.42
0.292457	0.0881641	-1052.46
0.231288	-0.362806	-1012.88
0.20429	-0.350583	-1012.53
0.0622934	-0.149102	-1032.43
0.0923643	0.127668	-1051
0.114442	0.218238	-1061.84
0.286821	0.287541	-1078.34
0.229015	0.149959	-1055.72
0.320999	-0.136481	-950.378
0.367399	-0.176772	-947.541
0.288942	-0.0468976	-967.067
0.345885	0.0494667	-993.654
0.29382	0.131326	-1008.19
0.260573	0.167184	-1015
0.257188	0.206614	-1024.58
0.217585	0.198329	-1018.96
0.284596	0.29422	-1059.99
0.216681	0.0457957	-985.25
0.221303	-0.0072138	-968.206
0.214931	-0.0912043	-948.894
0.182921	0.00666503	-966.072
0.150771	-0.00111958	-961.607
0.0853536	0.0821736	-981.909
0.134837	0.108658	-988.766
0.144147	0.16955	-1003.14
0.0864614	0.191758	-1017.88
0.0884154	0.228436	-1019.65
0.0571115	0.0167118	-964.325
-0.0780936	-0.0898138	-917.551
-0.0949866	-0.182424	-894.517
-0.144751	-0.186381	-895.534
-0.155759	-0.238417	-880.591
-0.21044	-0.254964	-865.764
-0.18482	-0.086644	-909.676
-0.20609	-0.0374514	-919.906
-0.165787	0.00843865	-940.807
-0.154015	-0.223241	-846.126
-0.103718	-0.223831	-854.938
-0.0882272	-0.189704	-857.588
-0.0539938	-0.1592	-858.655
-0.0821622	-0.121216	-853.65
-0.0882606	0.101592	-842.392
0.0983934	0.0108036	-884.915
0.106207	0.116679	-886.058
0.103485	0.134037	-885.549
0.177475	0.217309	-893.379
0.205459	0.182346	-893.447
0.224499	0.203064	-896.718
0.223186	0.152912	-906.338
0.195923	-0.0151607	-897.059
0.174584	0.00994079	-893.301
0.203255	0.029622	-898.25
0.216221	0.0257987	-905.386
0.341796	0.200445	-922.005
0.253609	-0.0301798	-907.12
0.224659	-0.0588456	-907.002
0.295823	-0.029579	-914.464
0.34662	-0.0921244	-928.276
0.201845	-0.188966	-903.24
0.196841	-0.312197	-897.693
0.247465	-0.296206	-911.349
0.288879	-0.328366	-913.734
0.250239	-0.210381	-796.608
0.202859	-0.186283	-797.373
0.186706	0.0675332	-797.539
0.182907	0.0468539	-797.613
0.283963	0.108851	-795.929
0.203412	0.122919	-797.235
0.227128	0.249809	-796.777
0.169964	0.271156	-797.697
0.104249	0.245505	-798.784
0.410696	-0.0627704	-793.944
-0.330617	0.248463	-805.928
-0.073682	0.211874	-801.714
-0.127958	-0.0863855	-802.765
-0.148802	-0.0212109	-803.084
-0.208418	-0.173369	-804.125
-0.138664	-0.222782	-802.994
-0.179943	-0.289709	-803.7
0.233389	0.308127	-712.902
0.225252	0.1787	-720.605
0.258888	0.185604	-722.8
0.330551	0.175339	-729.085
0.287884	0.140234	-727.999
0.309699	0.158091	-728.56
0.28334	0.21858	-722.593
0.182435	-0.045398	-731.032
0.267668	-0.113001	-741.101
0.234296	-0.232559	-744.461
0.105861	0.0238144	-726.789
0.088459	0.0892692	-721.206
0.0592906	0.0243508	-717.529
-0.0573121	-0.0161111	-710.926
-0.101017	-0.0734471	-713.725
-0.148602	-0.0074752	-703.266
-0.124394	0.0817104	-701.986
-0.153352	-0.204438	-717.474
-0.19144	-0.212073	-717.736
0.254804	-0.0865749	-657.026
0.251927	-0.19063	-665.32
0.205948	-0.083181	-657.526
0.184603	-0.290628	-661.366
0.234564	-0.0578927	-659.705
0.223141	-0.354417	-667.138
0.235501	0.0673893	-649.995
0.155485	0.04855	-648.136
0.128039	0.0739778	-644.377
0.102684	0.122613	-639.951
0.102259	0.198335	-631.464
0.150112	0.171731	-637.344
0.219967	0.215159	-642.806
0.22317	0.183592	-644.33
0.226155	0.135471	-646.46
-0.110679	-0.229538	-634.109
-0.130757	-0.207115	-631.401
-0.131494	-0.0933831	-627.434
0.27227	0.293831	-645.145
0.313006	0.261589	-656.085
-0.151348	-0.248808	-550.99
-0.143825	-0.231964	-551.028
-0.126083	-0.24439	-546.213
-0.125701	-0.218199	-555.942
-0.0844469	-0.192518	-551.23
-0.0847106	-0.172047	-556.101
-0.151829	-0.125872	-546.271
0.023079	-0.212888	-546.708
0.0186002	0.0162001	-551.73
0.0149686	0.044376	-546.906
0.0965022	0.272134	-547.394
0.0755699	0.217637	-542.424
0.137179	0.210828	-542.573
0.155637	0.224186	-547.486
0.16381	0.221026	-542.653
0.191662	0.233897	-542.74
0.15312	0.180749	-542.576
0.123042	0.140782	-552.15
0.198249	0.172562	-547.532
0.214905	0.149895	-547.546
0.228904	0.143497	-547.574
0.216958	0.26871	-547.698
0.276893	0.30111	-547.891
0.180111	0.0753219	-552.215
0.161696	0.0642611	-552.155
0.205145	-0.0111722	-552.178
0.256549	0.0422397	-547.52
0.188114	-0.227592	-547.118
-0.181557	-0.212546	-463.117
-0.192172	-0.144632	-468.139
-0.122018	-0.157145	-462.243
-0.12181	-0.102246	-467.101
-0.0714032	-0.189479	-471.184
-0.25972	-0.155844	-464.291
-0.290087	0.202848	-464.82
0.178605	0.127683	-457.837
0.270699	0.179512	-456.481
0.286612	0.208812	-461.101
0.394409	0.124585	-454.632
0.216992	0.042525	-457.248
0.184072	0.0428204	-462.587
0.249647	0.095787	-456.775
0.196683	-0.0340244	-462.385
0.223547	-0.0966762	-461.976
0.225481	-0.154005	-461.938
0.232026	-0.194469	-456.984
0.252006	-0.195093	-456.687
0.288127	-0.337763	-460.977
-0.214537	-0.220123	-416.083
-0.168513	-0.215023	-410.448
-0.130347	-0.235457	-409.979
-0.116013	-0.166409	-404.385
-0.0977686	-0.131304	-403.829
-0.137692	-0.0620204	-403.964
-0.143253	0.136894	-402.432
0.213594	0.066219	-397.005
0.260564	0.0127462	-401.481
0.254085	-0.100082	-397.497
0.187907	-0.293209	-404.749
0.272361	0.287093	-394.156
0.27903	0.319719	-393.77
-0.275364	-0.0866106	-301.27
-0.183399	-0.0173324	-303.572
-0.339925	-0.0156411	-291.343
-0.162169	0.147753	-294.275
-0.0923554	-0.0611466	-309.1
-0.170021	-0.110786	-306.9
-0.146162	-0.157375	-309.364
-0.110203	-0.206328	-312.462
-0.106006	-0.248982	-313.892
-0.207068	-0.25678	-314.24
-0.220811	-0.208523	-307.348
-0.212925	-0.170037	-311.458
0.192716	0.00937417	-315.398
0.284125	-0.0251881	-325.406
0.0300083	0.0276804	-312.158
0.102666	0.0757749	-309.127
0.0971191	0.0858998	-318.254
0.0731558	0.153814	-310.132
0.100808	0.209475	-309.635
0.102228	0.253149	-313.162
0.140606	0.248994	-310.212
0.181925	0.174147	-309.651
0.186407	0.160095	-310.305
0.262271	0.22318	-311.797
0.269811	0.26375	-310.852
0.201717	0.266564	-307.62
0.245648	0.310033	-308.263
-0.161888	-0.274157	-205.988
-0.127102	-0.33446	-201.964
-0.103695	-0.247631	-206.156
-0.119209	-0.172132	-206.635
-0.0227496	-0.0626398	-217.829
0.115205	0.03209	-232.74
0.134688	-0.11849	-236.824
0.248768	-0.126496	-241.458
0.248576	-0.291445	-243.626
0.255151	-0.0940359	-242.716
0.225599	0.00737817	-247.787
0.213465	0.031451	-247.315
0.318829	0.113327	-259.101
0.313696	0.0770434	-252.055
0.311335	0.153187	-259.47
0.269239	0.210929	-251.533
0.100843	0.178734	-235.303
0.0712237	0.163913	-237.824
0.151101	0.208213	-246.29
0.180151	0.234313	-244.014
0.192828	0.161363	-243.245
0.205531	0.123754	-243.411
0.181129	0.123217	-246.786
0.241188	0.10381	-257.377
0.194172	0.282233	-240.943
-0.253099	-0.143015	-180.311
-0.186797	-0.112533	-170.698
-0.149381	-0.135197	-168.613
-0.115105	-0.143684	-166.65
-0.0785507	-0.197236	-164.75
-0.112753	-0.178155	-166.662
-0.125781	-0.186523	-173.072
-0.160997	-0.2204	-175.273
0.172488	-0.328234	-155.619
0.238464	-0.261438	-145.725
0.243256	-0.286738	-151.141
0.264132	-0.314682	-149.97
0.304849	-0.118565	-146.747
0.174629	-0.0620062	-154.49
0.197932	0.00625817	-147.192
0.248553	0.0808574	-149.37
0.170835	0.114637	-153.963
0.286913	0.25811	-146.215
0.282233	0.208084	-146.73
0.217727	0.184878	-150.777
0.125576	0.187748	-150.78
0.341831	0.0621053	-149.371
-0.135945	0.112371	-81.9027
-0.183421	0.194651	-79.3514
-0.0672524	-0.047555	-87.8052
-0.158792	-0.0460596	-92.1112
-0.201798	-0.076028	-90.1963
-0.181254	-0.124465	-91.8628
-0.236665	-0.153699	-107.352
-0.149488	-0.261122	-109.054
-0.13413	-0.312505	-105.513
-0.19316	-0.262076	-105.583
0.0541117	-0.122251	-84.9289
0.285364	-0.347952	-83.8686
0.193818	-0.0367563	-74.0699
0.210165	-0.00925322	-66.3765
0.253583	-0.0447419	-77.0938
0.248355	0.03485	-67.7329
0.2646	0.0758333	-64.6441
0.332447	0.0217832	-64.2953
0.348971	0.146504	-62.1428
0.354985	0.233076	-51.4034
0.265489	0.161352	-59.8342
0.248481	0.191234	-59.0114
0.22973	0.239588	-57.2455
0.268079	0.243804	-55.1107
0.179956	0.286107	-57.1188
0.239672	0.315177	-52.5403
0.112926	0.267986	-55.8325
0.194296	0.201503	-61.1234
0.212999	0.188821	-55.2869
0.22992	0.171798	-61.0141
0.214721	0.160099	-62.419
0.189937	0.146767	-64.3898
0.195126	0.106758	-66.3625
0.146536	0.115304	-73.9101
0.120189	0.0736898	-71.9177
0.164833	0.0643349	-64.6106
0.120568	-0.0522278	-72.7946
0.0542397	0.054574	-76.2501
-0.367127	-0.158262	22.9597
-0.211393	-0.0920027	30.361
-0.101589	-0.149107	16.052
-0.130931	-0.143543	17.8154
-0.133541	-0.166552	10.9993
-0.112224	-0.223539	6.66394
-0.144688	-0.278409	10.7115
-0.177005	-0.228452	9.56486
-0.331894	0.207448	48.3023
-0.282415	0.121299	40.7507
-0.0148141	-0.194828	9.14901
0.186632	-0.346652	-11.7834
0.181812	-0.15511	3.3124
0.24198	-0.0489123	5.50466
0.296796	-0.0713117	1.75183
0.226404	0.0457614	16.8557
0.265962	0.0803799	5.67084
0.230824	0.114182	9.3146
0.196528	0.100387	15.8153
0.276468	0.126184	13.3926
0.0835968	0.172761	25.4544
0.0837562	0.158429	24.6278
0.0886794	0.0436018	17.8283
0.229731	0.217092	20.8638
0.235614	0.264105	23.2627
0.321969	0.296063	20.8791
0.325854	0.202055	15.3195
0.321322	0.0640127	7.65459
0.321984	-0.357536	-13.2889
0.34104	0.28644	84.9775
0.316437	0.205355	84.4142
0.263675	0.216078	86.2257
0.242664	0.161423	79.6655
0.219591	0.194243	86.8666
0.221042	0.267431	85.3597
0.129218	0.210942	84.3101
0.125913	0.225525	90.4297
0.104865	0.241957	91.4967
0.120843	0.0867126	86.6414
0.110522	0.0734053	80.9473
0.156593	0.0556172	79.1268
0.168868	0.0934496	79.8481
0.155828	0.151	81.8513
0.216245	0.136195	79.7055
0.303419	0.0945291	76.034
0.144757	0.00378124	77.9963
0.35074	0.0412722	78.7848
0.216315	-0.230035	75.9506
0.238015	-0.230092	69.7172
0.27501	-0.340535	71.6287
0.277216	-0.363728	71.0105
0.127905	-0.2782	71.712
0.0920727	-0.250905	79.0012
0.0693802	-0.150157	82.0609
0.0461932	0.0106255	86.6185
0.188028	-0.351968	68.2285
-0.125747	-0.180622	86.125
-0.162716	-0.102415	88.601
-0.123257	-0.107853	86.9698
-0.0839133	-0.177976	79.4815
-0.109947	-0.154727	83.5997
-0.214358	-0.178655	77.6689
-0.275857	0.212475	93.2752
-0.241531	0.155413	86.5661
0.224303	0.0491028	77.0075
0.191477	-0.0766329	80.3319
0.0215229	0.00198599	81.4667
0.239695	-0.121964	150.714
0.271919	-0.0772893	153.532
0.289529	-0.0680847	151.729
0.338435	-0.0664361	146.293
0.281864	-0.352422	147.509
0.238908	-0.346201	152.42
0.214241	-0.321819	149.99
0.283961	-0.0183197	153.24
0.315217	0.00576263	150.191
0.314918	0.0540694	145.584
0.343297	0.0498834	136.706
0.311727	0.158756	153.687
0.295802	0.211572	150.917
0.269324	0.254503	160.369
0.201529	0.241816	162.066
0.17927	0.200638	169.339
0.190976	0.176444	161.918
0.208174	0.160019	165.284
0.226395	0.0500516	155.394
0.174891	0.062179	167.017
0.0997647	0.153511	171.644
0.095254	0.219432	179.108
0.130475	0.207877	169.317
0.151479	0.207951	172.593
0.103521	0.228626	172.75
0.0216102	-0.00698027	171.515
-0.00150384	-0.0942597	183.54
-0.0288427	-0.0240157	182.395
-0.0891979	-0.245607	184.586
-0.147159	-0.312115	189.677
-0.244011	-0.24337	201.858
-0.336667	-0.0503029	221.731
0.232331	0.328674	166.009
0.227776	0.276032	240.584
0.223015	0.293874	241.211
0.249951	0.283154	240.218
0.275348	0.327294	240.819
0.220243	0.221823	233.629
0.259904	0.221369	232.601
0.225596	0.194996	238.343
0.239814	0.170818	237.294
0.246411	0.176591	237.289
0.249802	0.138326	236.118
0.218511	0.151635	231.684
0.186196	0.245909	235.182
0.184873	0.203794	234.023
0.190788	0.136775	237.584
0.202565	0.148315	237.61
0.200193	0.108803	230.939
0.180507	0.0888772	236.49
0.157766	0.1245	238.081
0.195637	0.0793777	235.834
0.250915	0.0624088	233.938
0.267829	0.0994917	234.556
0.221388	-0.0420718	231.924
0.162811	-0.277072	227.829
0.353062	-0.320001	216.326
-0.120915	-0.190736	236.279
-0.182239	0.0170387	243.597
-0.157461	0.0388471	243.6
-0.219069	-0.272968	236.425
-0.306778	-0.0221847	245.587
-0.305847	0.208559	252.09
-0.248335	0.180103	249.857
-0.171511	0.176676	242.241
0.36474	0.0444363	230.516
-0.201908	-0.15665	233.627
0.0276952	0.0173482	238.374
-0.0314118	-0.123039	342.021
-0.0621306	-0.160089	339.468
-0.195264	-0.196995	344.401
-0.243829	-0.188111	344.254
-0.0420381	-0.0121763	338.666
0.00711557	-0.0621482	339.788
0.00183063	0.0606899	336.406
-0.0776415	0.0596385	336.249
0.0448182	0.0102171	332.192
0.111598	0.0850342	329.831
0.112552	0.108946	334.734
0.108499	0.151283	333.49
0.0808143	0.231603	327.519
0.176784	0.0995195	334.87
0.141156	0.0379252	336.771
0.159703	-0.0685493	334.003
0.219317	-0.0787207	339.745
0.388055	-0.254364	342.746
0.301691	0.106865	332.585
0.280176	0.117565	329.13
0.270409	0.0752867	335.38
0.261768	0.129904	328.172
0.290203	0.167762	331.212
0.266876	0.176792	332.385
0.257108	0.253072	327.667
0.22268	0.150847	333.251
0.189874	0.173386	332.657
0.382852	0.238369	327.847
0.235886	0.0122796	337.319
0.225643	0.0227009	337.034
0.265267	-0.0376273	406.857
0.207305	-0.0549718	409.195
0.206169	-0.0140425	405.861
0.148045	-0.0911283	402.076
0.110447	-0.0389019	399.946
0.0601058	0.0347578	405.194
0.0320563	0.0847718	403.292
-0.0359994	-0.00951741	404.571
-0.0344098	-0.0226096	400.759
-0.0494624	-0.0696291	401.773
-0.0697225	-0.101291	402.846
-0.0764528	-0.112606	402.579
-0.137593	-0.121348	399.343
-0.157688	-0.158357	396.661
-0.151455	-0.22516	392.354
-0.199075	-0.250547	394.77
-0.228232	-0.205991	394.647
-0.190093	0.0644984	396.588
-0.256232	0.215039	402.405
0.0984241	0.23887	408.142
0.125042	0.117696	407.412
0.183667	0.170783	411.034
0.180101	0.188696	407.449
0.200284	0.139818	411.05
0.246693	0.119631	408.096
0.283267	0.106011	412.408
0.271864	0.104557	412.157
0.311313	0.0756832	412.667
0.31494	0.0555644	408.829
0.251556	0.059391	407.56
0.230733	0.0508098	408.889
0.178302	0.2866	412.147
0.239423	0.238613	409.202
0.343791	0.273746	415.43
0.270825	0.314776	410.656
0.338758	0.00607137	412.498
0.29347	-0.0332926	411.182
0.315024	-0.0501205	411.467
0.341028	-0.0101677	406.834
0.366191	-0.00497787	407.403
0.314324	-0.199091	410.035
0.347484	-0.330529	409.47
0.311887	-0.30717	405.256
0.279661	-0.361902	405.92
0.282839	-0.302611	404.699
-0.107355	-0.200256	399.109
0.385397	-0.0456969	411.113
-0.330862	-0.103247	483.844
-0.165839	-0.263146	482.426
-0.123155	-0.334056	478.493
-0.137946	-0.164247	481.614
-0.0689294	-0.11482	480.493
-0.0974617	-0.0445681	480.544
-0.115028	0.0127229	480.512
-0.0585677	-0.0230815	479.941
0.00323128	-0.0678267	477.44
0.0303786	0.00499432	476.797
0.0645743	-0.0867371	478.542
0.112532	-0.0704878	477.839
0.143991	-0.107332	477.559
0.122098	-0.00968322	477.48
0.144456	0.0394801	476.97
0.132736	0.031395	477.162
0.130598	0.0438986	477.135
0.125732	0.0880603	475.155
0.0980147	0.188062	476.932
0.10222	0.210156	474.928
0.152332	0.270409	475.842
0.178443	0.277018	475.464
0.212015	0.282887	474.989
0.268004	0.224027	474.502
0.276002	0.21667	474.427
0.279215	0.186514	474.518
0.311752	0.130606	474.331
0.270189	0.119592	474.935
0.208871	0.177718	475.497
0.191803	0.205673	475.601
0.179593	0.113011	476.175
0.19772	0.0990296	475.994
0.206787	0.0843165	475.938
0.210499	0.119617	475.732
0.239308	0.0622392	475.602
0.199337	0.0629914	476.132
0.274497	0.0335415	475.258
0.294199	0.0651579	474.855
0.365079	0.0673343	473.898
0.319264	0.0320518	474.667
0.353947	-0.0577592	474.565
0.401388	-0.0800507	474.016
0.271913	-0.145079	475.993
0.322085	-0.316397	475.974
0.306095	-0.312963	476.175
0.27412	-0.316373	476.615
0.155269	-0.303467	478.154
0.198307	-0.00886423	476.459
0.232961	-0.0371446	476.103
0.0602564	0.0306901	478.134
-0.192861	-0.205111	576.703
-0.168764	-0.107526	572.287
-0.0994805	-0.160381	573.807
-0.0466756	-0.142212	572.167
0.0343959	-0.13002	567.784
0.0662946	-0.201423	568.602
0.150905	-0.332389	560.335
0.176891	-0.338451	565.062
0.215616	-0.332587	561.99
0.210531	-0.224849	562.186
0.267923	-0.193603	562.233
0.267357	-0.281927	562.222
0.291179	-0.0761125	557.836
0.226647	-0.145096	563.554
0.222812	-0.110948	561.836
0.201407	-0.118009	564.36
0.261767	-0.0692017	558.768
0.292209	-0.00904259	561.526
0.235201	0.0188069	559.637
0.268365	0.0490007	562.301
0.314715	0.0685691	560.844
0.298357	0.0445725	559.502
0.326649	0.041712	560.457
0.279115	0.0973763	561.98
0.212624	0.0911048	560.378
0.156232	0.0392897	563.991
0.125144	0.0518209	566.828
0.108891	0.0407264	567.338
0.149749	-0.0656134	564.159
0.0876284	0.134842	568.045
-0.0875126	0.187936	573.566
-0.217781	0.224134	572.091
0.100247	0.203448	565.821
0.105568	0.218703	567.509
0.167357	0.217026	565.556
0.149873	0.197089	564.251
0.274361	0.239015	560.333
0.27644	0.205789	562.105
0.290849	0.201543	561.648
0.333264	0.159774	556.591
0.328942	0.277032	560.472
0.323939	0.303792	560.64
0.173564	0.277634	563.532
0.211864	0.145303	560.422
-0.115328	-0.1397	648.83
-0.176942	-0.164342	651.359
-0.194868	-0.189227	655.328
-0.224596	-0.113231	651.524
-0.286079	0.00751748	655.898
-0.207323	0.0519139	649.412
-0.106055	0.054375	643.439
-0.214405	0.186445	648.599
0.0119113	0.0963055	647.199
0.0201283	0.0858703	647.226
0.0582102	0.0232409	642.159
0.0419937	-0.0124763	646.308
0.109187	0.0173818	640.797
0.170676	0.0491597	638.147
0.183608	0.00551256	644.457
0.262182	-0.02508	637.276
0.283854	0.0747523	636.903
0.25393	0.142847	633.243
0.202684	0.123703	632.481
0.204984	0.16084	639.792
0.189312	0.25541	635.022
0.197782	0.264492	634.535
0.276163	0.272141	634.79
0.254764	0.329076	631.167
0.297764	0.230176	626.895
0.257322	0.19411	629.032
0.243378	-0.281929	646.456
0.192292	-0.259215	641.894
0.201278	-0.290138	639.55
0.159341	-0.355738	650.63
0.286729	-0.361235	641.41
0.334224	-0.313644	638.918
0.359841	-0.0667934	638.106
0.219936	-0.176477	639.192
0.319939	0.274661	712.662
0.278263	0.215702	714.755
0.27083	0.168769	716.7
0.219133	0.201202	717.911
0.202601	0.202376	712.558
0.161264	0.123931	717.047
0.109094	0.137537	712.334
0.0665118	0.161685	718.842
0.115126	0.235095	716.955
0.12614	0.261815	725.695
0.23782	0.092344	712.794
0.258557	0.0966247	712.647
0.278602	0.0960416	712.411
0.308107	0.0845431	709.077
0.32895	-0.0207183	712.407
0.342676	-0.0326981	709.273
0.41638	-0.107604	709.981
0.268182	-0.142604	711.051
0.308818	-0.138407	705.106
0.345697	-0.196804	706.501
0.26085	-0.262566	706.35
0.201086	-0.353091	702.726
0.226701	-0.0715861	712.699
0.227778	-0.040157	713.211
0.158436	0.00104801	711.896
0.0988135	-0.0128109	717.888
0.0742755	-0.0281849	717.905
0.04964	-0.00453208	715.794
-0.102252	0.201248	718.965
-0.181418	0.17492	722.125
-0.201426	0.169241	719.461
-0.315783	-0.138659	711.982
-0.1572	-0.289933	704.574
-0.11104	-0.192603	716.95
-0.145007	-0.126668	718.559
-0.148226	-0.141326	715.546
-0.0681273	-0.122415	709.402
-0.0194767	-0.108418	709.094
-0.00868698	-0.103387	717.402
-0.00455377	-0.197947	707.273
-0.17275	0.111799	715.167
0.379123	0.0100375	706.828
0.382636	-0.0379432	705.959
0.381371	-0.295205	707.241
-0.295692	-0.164087	788.485
-0.167023	-0.239953	777.861
-0.090204	-0.220643	789.077
-0.104281	-0.226512	788.527
-0.12271	-0.0735263	802.348
0.0912406	-0.26407	774.937
0.131536	-0.349393	769.992
0.258118	-0.333467	770.386
0.255746	-0.293346	774.826
0.286184	-0.195732	785.239
0.232727	-0.238241	781.136
0.231852	-0.158088	785.089
0.223327	-0.0730519	799.412
0.205725	0.0219296	815.169
0.210391	-0.0171169	800.83
0.176581	-0.00158611	802.901
0.261041	-0.00170952	811.732
0.154241	-0.20776	775.581
0.197026	0.0907182	823.591
0.281521	0.171158	817.798
0.251708	0.229982	830.116
0.193709	0.235316	836.259
0.187997	0.182048	829.871
0.347665	0.107622	814.271
-0.187479	-0.155543	788.294
0.296039	0.316021	840.058
0.34223	0.184911	818.812
0.0296726	0.0137349	806.315
-0.134694	0.205585	860.171
-0.0935476	0.131089	861.124
-0.103154	0.0655352	861.482
-0.216903	-0.0319794	860.918
-0.303649	0.020236	859.691
-0.242163	-0.249841	866.689
-0.173276	-0.158296	862.065
-0.130373	-0.217317	862.837
-0.1408	-0.240283	862.853
0.0879814	0.261016	862.207
0.159699	0.254147	862.966
0.169269	0.232423	863.203
0.18569	0.209595	863.514
0.264466	0.148598	864.696
0.314807	0.293863	864.254
0.29424	0.0739787	865.477
0.203068	0.0447788	864.758
0.37546	0.0419677	866.494
0.368413	-0.0361664	866.894
0.378777	-0.0894009	867.288
0.411631	-0.0674615	867.496
0.355928	-0.0731926	866.972
0.315222	-0.00342819	866.185
0.272561	-0.202604	866.849
0.258471	-0.223319	866.822
0.256501	-0.266888	867.04
0.140923	-0.00203965	864.44

## Sheet: Sheet2
0.374945	-0.110326	-1922.29
0.355198	-0.281413	-1863.05
0.395967	-0.195707	-1764.86
0.404855	-0.174897	-1298.78
0.311053	-0.186477	-1144.06
0.31066	-0.151027	-1035.63
0.297113	-0.250485	-6.91043
0.334688	-0.172551	73.9441
0.324088	-0.165026	146.136
0.327191	-0.146544	221.118
0.331368	-0.240108	224.395
0.274321	-0.198371	226.849
0.26018	-0.201521	221.524
0.132924	-0.29211	222.624
0.286602	-0.15062	335.834
0.31761	-0.18876	336.747
0.358385	-0.143507	340.216
0.292159	-0.222597	343.286
0.16362	-0.276764	339.352
0.149057	-0.340037	397.879
0.355239	-0.202863	407.144
0.363455	-0.225586	405.248
0.362199	-0.180047	409.355
0.323947	-0.22993	409.941
0.157931	-0.330743	478.222
0.159927	-0.345927	478.253
0.318201	-0.125854	475.302
0.331329	-0.256066	558.359
0.303609	-0.252661	561.086
0.351272	-0.209282	641.6
0.31201	-0.204013	645.427
0.37419	-0.270531	636.751
0.28561	-0.264148	642.017
0.33375	-0.288053	707.892
0.338584	-0.311222	699.11
0.308883	-0.251519	778.858
0.31219	-0.268702	781.807
0.373344	-0.266751	781.365
0.180519	-0.327583	866.615
