# Supplementary material for: Spinal premotor interneurons controlling antagonistic muscles are spatially intermingled
Source: eLife. 2022 Dec 13;11:e81976. doi: 10.7554/eLife.81976 (PMC9844990; doi:10.7554/eLife.81976)
Supplement: Figure 12—figure supplement 3—source data 4. [file elife-81976-fig12-figsupp3-data4.xlsx]

## Sheet: Sheet1
-0.0665128	-0.113471	-2797.11
-0.0713615	-0.145442	-2788.61
-0.151459	-0.202891	-2785.1
-0.183641	-0.182494	-2789.71
-0.129192	-0.24344	-2785.26
0.0709159	0.0931151	-2791.88
0.0716998	0.0157528	-2787.54
0.101015	0.00928667	-2790.26
0.0240853	0.0408695	-2792.8
0.129909	0.0427267	-2787.67
0.0902074	0.199458	-2789.54
0.31794	0.235831	-2790.5
0.256032	0.125871	-2789.14
0.280678	0.225675	-2792.8
0.3337	-0.11478	-2797.62
0.304786	-0.187748	-2798.07
0.371374	-0.183034	-2797.25
0.242617	-0.00655963	-2796.85
0.177866	-0.0459668	-2791.19
0.180801	-0.106728	-2797.85
0.323249	0.0115888	-2797.97
0.182606	0.100813	-2797.98
0.311528	0.179478	-2788.48
0.0841744	0.300594	-2796.07
0.220832	-0.0116511	-2788.65
-0.25505	0.173433	-2712.06
-0.108277	-0.118829	-2707.24
-0.108628	-0.164823	-2705.51
-0.124661	-0.18238	-2713.19
0.176809	0.00874089	-2713.02
0.132967	0.0657776	-2716.43
0.0830768	0.2696	-2704.58
0.164434	0.258122	-2712.83
0.131407	0.146584	-2707.95
0.170753	0.107285	-2714.2
0.174861	0.128281	-2708.37
0.189109	0.10114	-2711.21
0.281885	0.216558	-2716.06
0.353392	0.185634	-2712.22
0.309642	0.0250245	-2710.47
0.315329	-0.0749934	-2712.02
0.317884	-0.137162	-2711.96
0.35003	-0.181152	-2710.1
0.387738	-0.256383	-2717.27
0.244255	-0.366118	-2712.86
0.248152	-0.214552	-2709.67
0.178773	-0.194861	-2705.36
0.204313	-0.0794736	-2712.69
0.128103	0.0157713	-2713.19
-0.177935	-0.139024	-2631.9
-0.161089	-0.0647433	-2631.9
-0.0998742	-0.0579903	-2635.14
0.0222245	-0.111036	-2635.14
0.21623	-0.0490521	-2635.14
0.262467	-0.168989	-2628.66
0.245381	-0.257961	-2635.14
0.333251	-0.19826	-2628.66
0.302844	-0.0111263	-2631.9
0.285317	0.0760596	-2635.14
0.303725	0.161612	-2628.66
0.273833	0.133797	-2635.14
0.230973	0.199411	-2635.14
0.189724	0.153022	-2635.14
0.150475	0.0942645	-2631.9
0.141217	0.0613362	-2631.9
0.0802951	0.146436	-2631.9
0.319593	-0.0426055	-2631.9
-0.121476	-0.18114	-2625.42
0.00699841	-0.164348	-2635.14
0.238364	0.153353	-2628.66
0.118927	0.184744	-2635.14
0.105925	0.021263	-2628.66
0.0658849	0.0255495	-2628.66
-0.300625	0.172783	-2542.18
-0.135102	-0.194404	-2548.66
-0.162447	-0.27576	-2548.66
-0.0756866	-0.212984	-2551.9
-0.112439	-0.138469	-2548.66
0.134923	-0.177124	-2542.18
0.188725	-0.162177	-2542.18
0.321713	-0.127648	-2551.9
0.210731	-0.39794	-2548.66
0.341279	-0.0487032	-2545.42
0.339295	0.0510704	-2548.66
0.191858	0.13153	-2551.9
0.123843	0.053361	-2551.9
0.0809171	0.109432	-2551.9
0.105736	0.180221	-2548.66
0.063997	0.18636	-2551.9
0.115474	0.211104	-2548.66
0.0941716	0.273995	-2548.66
-0.123711	-0.217712	-2468.66
-0.210299	-0.249274	-2465.42
-0.248337	-0.0830334	-2468.66
-0.142569	0.108666	-2468.66
-0.0421796	-0.132522	-2471.9
-0.0499218	0.0175755	-2471.9
0.193425	0.259914	-2465.42
0.101586	0.303839	-2465.42
0.109882	0.178888	-2468.66
0.142247	0.185599	-2465.42
0.123366	0.142592	-2462.18
0.079597	0.141682	-2468.66
0.0981656	0.0649221	-2462.18
0.154921	0.0758856	-2468.66
0.234889	0.12879	-2468.66
0.233108	0.173627	-2468.66
0.229324	0.187801	-2462.18
0.330275	0.20066	-2468.66
0.347189	0.00101887	-2465.42
0.30208	-0.127296	-2471.9
0.347784	-0.0654966	-2471.9
0.229109	-0.0622895	-2465.42
0.132194	-0.0211688	-2471.9
0.0902047	0.17954	-2471.9
0.348877	0.311285	-2462.18
0.296055	-0.0130072	-2468.66
0.183129	-0.0136229	-2465.42
0.227713	0.049003	-2465.42
0.156403	0.139567	-2468.66
-0.138088	-0.155326	-2391.9
-0.125931	-0.196713	-2395.14
-0.139598	-0.232868	-2395.14
-0.0526102	-0.0130716	-2398.38
-0.0881992	0.0298033	-2388.66
-0.226345	0.206396	-2395.14
-0.279972	-0.0210904	-2398.38
0.132728	-0.216596	-2385.42
0.284469	-0.0753645	-2382.18
0.286152	-0.0616113	-2391.9
0.371354	-0.0265662	-2388.66
0.342748	0.0356585	-2385.42
0.237945	0.0211516	-2391.9
0.26258	0.0436719	-2388.66
0.221341	0.0672016	-2391.9
0.170417	0.0526193	-2391.9
0.141063	0.024666	-2395.14
0.116062	0.10073	-2395.14
0.0957795	0.182227	-2395.14
0.0898517	0.278596	-2391.9
0.193615	0.134994	-2385.42
0.126366	0.146031	-2385.42
0.25007	0.173293	-2395.14
0.226082	0.273039	-2385.42
0.258078	0.30209	-2391.9
0.326211	-0.0569062	-2388.66
0.118454	-0.0999736	-2385.42
0.396382	0.248517	-2388.66
0.185391	0.21698	-2398.38
-0.134974	-0.236985	-2311.9
-0.0808068	-0.211208	-2315.14
-0.083185	-0.168524	-2302.18
-0.192448	0.0414787	-2315.14
0.170389	0.0653665	-2311.9
0.163637	0.0730748	-2308.66
0.157251	0.0416315	-2308.66
0.2493	-0.0306825	-2305.42
0.185946	-0.0448354	-2315.14
0.203571	-0.0868165	-2308.66
0.16122	-0.0840102	-2308.66
0.220894	0.0774836	-2308.66
0.216248	0.11477	-2308.66
0.265768	0.0709074	-2308.66
0.228287	0.16411	-2305.42
0.170791	0.138821	-2311.9
0.0869471	0.200952	-2311.9
0.0866442	0.175512	-2305.42
0.0961756	0.22062	-2308.66
0.0449584	0.322611	-2311.9
0.275424	0.225434	-2308.66
0.319631	0.202918	-2305.42
0.359861	0.21533	-2302.18
0.341887	0.250307	-2305.42
0.29714	0.178551	-2311.9
0.320267	0.271653	-2302.18
0.263459	0.261506	-2311.9
0.34258	-0.0525762	-2315.14
0.37181	-0.0766023	-2308.66
0.371065	-0.143678	-2311.9
0.362599	-0.257391	-2311.9
0.403374	-0.265179	-2308.66
0.228841	-0.360941	-2311.9
0.339091	-0.0270006	-2308.66
0.297805	0.24244	-2311.9
0.11837	0.324808	-2231.9
0.175322	0.140461	-2231.9
0.197142	0.159538	-2231.9
0.243268	0.164605	-2231.9
0.271562	0.159705	-2231.9
0.382728	0.244059	-2225.42
0.121548	0.0559617	-2231.9
0.112242	0.0700039	-2231.9
0.186152	-0.150567	-2231.9
0.219065	-0.182863	-2228.66
0.221801	-0.232469	-2231.9
0.247773	-0.131332	-2231.9
0.296592	-0.0922257	-2231.9
0.330541	-0.000355953	-2228.66
0.364994	-0.0475061	-2231.9
0.391067	-0.197612	-2228.66
0.307809	-0.0348955	-2231.9
-0.155153	-0.229132	-2235.14
-0.104961	-0.15871	-2228.66
-0.141521	-0.105539	-2231.9
-0.199803	-0.177601	-2228.66
-0.230136	-0.270955	-2228.66
-0.183706	-0.243801	-2225.42
0.35718	-0.0676867	-2235.14
0.0752553	0.189043	-2231.9
0.411961	0.0136005	-2231.9
0.257326	-0.238995	-2151.9
0.411959	-0.331021	-2148.66
0.379896	-0.145519	-2148.66
0.442475	0.096138	-2148.66
0.263087	0.12425	-2151.9
0.282822	0.0775199	-2148.66
0.310071	0.0627065	-2151.9
0.217553	0.0317961	-2151.9
0.219745	0.0624122	-2145.42
0.213081	0.0933671	-2145.42
0.184123	0.113082	-2148.66
0.16022	0.113725	-2151.9
0.172004	0.0683727	-2148.66
0.162684	0.0342538	-2148.66
0.155633	-0.0288294	-2151.9
0.203488	-0.0265202	-2145.42
0.223171	-0.0775865	-2151.9
0.173066	-0.116245	-2148.66
0.0922793	-0.0646197	-2155.14
0.118596	0.0484156	-2151.9
0.13923	0.0681089	-2155.14
0.0926664	0.0952358	-2151.9
0.0749601	0.0305897	-2155.14
0.075637	0.145392	-2151.9
0.171971	0.196281	-2148.66
0.0425118	0.184096	-2151.9
0.0946617	0.242044	-2151.9
0.0304432	0.0125385	-2145.42
-0.0899056	-0.149814	-2148.66
-0.0995436	-0.221367	-2148.66
-0.127291	-0.259663	-2151.9
-0.154132	-0.217004	-2155.14
-0.239035	0.138807	-2155.14
0.336288	-0.0554322	-2145.42
0.295984	-0.0387032	-2148.66
0.145801	0.126597	-2145.42
0.135169	0.145523	-2148.66
0.105178	0.16411	-2151.9
0.200767	0.151568	-2065.42
0.232067	0.11988	-2068.66
0.221332	0.132564	-2068.66
0.202189	0.0769401	-2065.42
0.204771	0.127554	-2068.66
0.15987	0.133434	-2068.66
0.29464	0.177579	-2065.42
0.347927	0.11924	-2068.66
0.298163	0.0549643	-2065.42
0.284304	0.0350964	-2065.42
0.315179	0.0229785	-2065.42
0.281138	-0.0369465	-2065.42
0.309841	-0.0204939	-2068.66
0.36551	0.000266252	-2068.67
0.36367	-0.143919	-2068.67
0.21986	-0.0361342	-2068.66
0.198998	-0.0769484	-2065.42
0.182605	-0.280546	-2071.9
0.116148	-0.0405667	-2068.66
0.0897981	0.030074	-2071.9
0.020397	0.00615139	-2068.66
0.0441599	0.0808371	-2068.66
0.0751714	0.0985897	-2068.66
0.0429687	0.0548324	-2068.66
0.172153	0.0357377	-2068.66
0.201061	0.0457429	-2065.42
0.180112	-0.0126075	-2065.42
0.100569	-0.059364	-2065.42
-0.0996293	-0.191389	-2071.9
-0.0919719	-0.152752	-2071.9
-0.076169	-0.0217643	-2065.42
-0.123852	-0.193522	-2071.9
-0.107838	-0.238849	-2068.66
-0.196308	-0.219113	-2071.9
-0.218916	-0.19514	-2071.9
0.128626	0.0266201	-2071.9
0.238387	-0.0267054	-2068.66
0.093481	0.00236155	-2068.66
0.0677931	0.00228895	-2068.66
-0.0965835	0.0629025	-1995.14
-0.184135	-0.146285	-1991.9
-0.258985	-0.139923	-1998.38
-0.19761	-0.255994	-1995.14
0.0769596	-0.0446344	-1995.14
0.259887	-0.262887	-1988.66
0.285668	-0.208822	-1991.9
0.301673	-0.381334	-1985.42
0.335401	0.267682	-1985.42
0.416708	0.332589	-1988.66
0.311285	0.196191	-1991.9
0.347316	0.221214	-1985.42
0.274222	0.162863	-1988.66
0.303234	0.134082	-1991.9
0.297982	0.0263854	-1988.66
0.245996	0.148896	-1991.9
0.200307	0.236577	-1988.66
0.16807	0.229088	-1991.9
0.129944	0.164912	-1988.66
0.100561	0.153116	-1991.9
0.129008	0.431318	-1991.9
0.185207	0.0869149	-1985.42
0.184435	0.0575704	-1991.9
0.144776	0.0668503	-1988.66
0.138385	0.0491442	-1988.66
0.132773	0.024736	-1988.66
0.26543	-0.208841	-1988.66
0.26125	0.150716	-1985.42
0.267698	0.19168	-1991.9
-0.107153	-0.149753	-1915.14
-0.093229	-0.200804	-1911.9
-0.0630797	-0.153612	-1918.38
-0.113614	-0.263187	-1911.9
-0.161417	-0.256315	-1911.9
-0.170475	-0.121643	-1915.14
-0.174649	0.0224745	-1915.14
-0.209506	0.0115165	-1915.14
-0.173326	-0.0327503	-1915.14
0.0442148	-0.138917	-1911.9
0.225829	-0.172749	-1911.9
0.254858	-0.255369	-1915.14
0.243332	-0.319486	-1911.9
0.2482	-0.107008	-1911.9
0.236846	-0.0582041	-1915.14
0.253504	-0.0524782	-1908.66
0.194583	-0.0383738	-1915.14
0.312172	-0.109999	-1908.66
0.291774	0.136988	-1911.9
0.30315	0.117137	-1915.14
0.308499	0.199485	-1908.66
0.356345	0.154446	-1915.14
0.416382	0.0961633	-1911.9
0.200627	0.12301	-1908.66
0.197809	0.149853	-1918.38
0.1783	0.147855	-1918.38
0.169809	0.13084	-1915.14
0.124707	0.134173	-1915.14
0.106134	0.153433	-1918.38
0.0971609	0.134571	-1915.14
0.115534	0.182939	-1911.9
0.131002	0.0579843	-1915.14
0.0820802	-0.0052434	-1915.14
0.137925	0.0180752	-1915.14
0.263995	0.0780936	-1915.14
0.11369	0.167554	-1911.9
0.168859	-0.119271	-1915.14
0.431903	0.211794	-1905.42
0.346645	-0.0317703	-1828.66
0.462792	0.106591	-1828.66
0.362135	0.141656	-1828.66
-0.151273	-0.155844	-1825.42
-0.162489	-0.133599	-1831.9
-0.131418	-0.138397	-1831.9
-0.112763	-0.16426	-1831.9
-0.306886	0.00272786	-1828.66
-0.143993	-0.122627	-1831.9
0.0789915	0.0668729	-1831.9
0.163978	-0.0243487	-1828.66
0.218027	-0.129682	-1825.42
0.255966	-0.0637178	-1822.18
0.297026	-0.137216	-1822.18
0.159176	0.0299857	-1828.66
0.161906	0.0226385	-1835.14
0.237504	0.102346	-1825.42
0.218186	0.114293	-1831.9
0.263786	0.0563071	-1828.66
0.243283	0.0851696	-1828.66
0.283483	0.0790621	-1828.66
0.249091	0.229655	-1825.42
0.187367	0.29157	-1822.18
0.398292	0.0922406	-1828.66
-0.219784	-0.248002	-1748.66
-0.146077	-0.199268	-1748.66
-0.122299	-0.18925	-1751.9
-0.116568	-0.177604	-1751.9
-0.0994603	-0.183794	-1755.14
-0.0913826	-0.187707	-1755.14
-0.107171	-0.118509	-1751.9
-0.122449	-0.091144	-1751.9
-0.119066	-0.0774194	-1751.9
-0.176789	-0.0919788	-1755.14
-0.076312	-0.0345814	-1755.14
0.145926	0.101968	-1755.14
0.202583	0.101056	-1748.66
0.193004	0.0766116	-1755.14
0.169447	0.0688253	-1755.14
0.177189	0.0514462	-1748.66
0.176281	-0.0292348	-1751.9
0.218926	-0.0840153	-1755.14
0.248716	-0.127956	-1745.42
0.235626	-0.102124	-1755.14
0.268871	-0.175415	-1751.9
0.230254	-0.288389	-1748.66
0.225348	-0.329016	-1745.42
0.29041	-0.39499	-1751.9
0.344351	-0.0791174	-1755.14
0.308936	-0.0214107	-1751.9
0.311232	-0.00041971	-1748.66
0.330766	0.0264869	-1751.9
0.282342	0.157393	-1745.42
0.269677	0.175208	-1751.9
0.263066	0.219396	-1745.42
0.239757	0.225748	-1755.14
0.209038	0.227511	-1755.14
0.198245	0.1857	-1748.66
0.12679	0.166149	-1748.66
0.148647	0.115133	-1748.66
0.166677	0.128572	-1742.18
0.0887129	0.279377	-1748.66
0.163227	0.157129	-1751.9
0.270809	0.132889	-1755.14
0.196124	0.231189	-1751.9
0.308029	-0.104213	-1755.14
-0.173233	-0.170406	-1675.14
-0.156125	-0.259736	-1671.9
-0.138454	-0.165181	-1671.9
-0.127424	-0.175057	-1678.38
-0.174887	-0.148996	-1671.9
-0.185949	-0.0942135	-1668.66
-0.122533	-0.103961	-1675.14
-0.0952513	-0.119379	-1678.38
-0.0465632	-0.102549	-1678.38
0.269609	-0.222864	-1675.14
0.259112	-0.285703	-1675.14
0.289676	-0.398573	-1668.66
0.322291	-0.401619	-1668.66
0.160331	-0.127433	-1665.42
0.241568	-0.051381	-1671.9
0.236697	-0.0477513	-1675.14
0.189703	-0.0655239	-1668.66
0.220391	0.0273019	-1675.14
0.243464	0.029704	-1675.14
0.257971	0.00548547	-1675.14
0.354622	-0.0863035	-1668.66
0.343168	0.0285249	-1668.66
0.361764	0.100133	-1671.9
0.450343	0.186692	-1665.42
0.350508	0.255317	-1668.66
0.272535	0.222609	-1675.14
0.277314	0.120836	-1675.14
0.27697	0.141969	-1678.38
0.267905	0.13005	-1668.66
0.252797	0.140037	-1675.14
0.286576	0.0895718	-1675.14
0.270102	0.0877434	-1671.9
0.270287	0.0574792	-1678.38
0.245262	0.0771594	-1675.14
0.239507	0.0631318	-1675.14
0.166948	0.136793	-1675.14
0.188492	0.167773	-1675.14
0.0572585	0.145784	-1675.14
0.144257	0.0684051	-1668.66
0.127894	0.246751	-1668.66
0.404573	-0.0190298	-1675.14
-0.270366	-0.0367882	-1588.66
-0.150463	0.0871779	-1591.9
-0.0566734	0.0623798	-1591.9
-0.15539	-0.115847	-1595.14
-0.256425	-0.0946911	-1598.38
-0.208393	-0.194215	-1591.9
-0.14762	-0.21981	-1595.14
-0.127333	-0.160327	-1591.9
-0.109484	-0.119607	-1591.9
-0.0868759	-0.174372	-1588.66
-0.0970573	-0.224042	-1591.9
-0.0954587	-0.230731	-1595.14
0.0605522	0.0210778	-1595.14
0.129366	0.0352367	-1588.66
0.203725	-0.114747	-1595.14
0.237359	-0.264711	-1585.42
0.350578	-0.275834	-1591.9
0.362897	-0.116144	-1591.9
0.287992	-0.0584194	-1598.38
0.293607	-0.0367349	-1595.14
0.250458	-0.0118709	-1595.14
0.250068	0.0412161	-1585.42
0.226792	0.0826163	-1595.14
0.22163	0.10969	-1595.14
0.267252	0.139999	-1585.42
0.270019	0.113565	-1591.9
0.286832	0.136843	-1585.42
0.308664	0.174711	-1588.66
0.288166	0.19296	-1595.14
0.257708	0.20532	-1591.9
0.203626	0.139569	-1595.14
0.170834	0.15374	-1591.9
0.134775	0.11431	-1595.14
0.117451	0.176076	-1588.66
0.244744	0.155053	-1588.66
0.270088	0.167655	-1595.14
0.176708	-0.0821442	-1588.66
0.426615	-0.385818	-1595.14
-0.0882974	-0.0360918	-1515.14
-0.019804	0.0326673	-1505.42
-0.0758993	0.0336944	-1505.42
-0.187159	0.014733	-1515.14
-0.181643	0.413247	-1511.9
-0.164954	-0.115744	-1515.14
-0.217299	-0.195197	-1505.42
-0.227468	-0.298011	-1505.42
-0.12674	-0.238073	-1511.9
-0.0714889	-0.142133	-1511.9
-0.0548386	-0.113101	-1505.42
-0.107526	-0.0709138	-1505.42
-0.144764	-0.16202	-1518.38
-0.145889	-0.18566	-1515.14
-0.172723	-0.156245	-1511.9
-0.145724	-0.15139	-1508.66
-0.185841	-0.139401	-1508.66
0.137828	0.0460253	-1515.14
0.15991	0.0416288	-1515.14
0.172849	0.0662346	-1505.42
0.199556	0.0988366	-1518.38
0.219088	0.120091	-1515.14
0.2278	0.0947411	-1508.66
0.259985	0.122637	-1511.9
0.156431	0.205557	-1515.14
0.118363	0.397174	-1505.42
0.349223	-0.0104339	-1515.14
0.352149	-0.12904	-1518.38
0.312504	-0.216811	-1508.66
0.279392	-0.269678	-1518.38
0.255663	-0.180046	-1511.9
0.203236	-0.0471047	-1508.66
0.138922	0.161131	-1511.9
-0.129122	-0.00687376	-1428.66
-0.0543555	0.0812146	-1428.66
-0.172354	-0.105859	-1425.42
-0.128118	-0.12746	-1431.9
-0.143812	-0.245809	-1435.14
0.10708	0.00324737	-1438.38
0.113715	0.0772927	-1435.14
0.128012	0.113192	-1435.14
0.131677	0.135411	-1428.66
0.0700331	0.167972	-1431.9
0.179876	0.130565	-1431.9
0.162817	0.102202	-1425.42
0.201961	0.153009	-1428.66
0.215314	0.120555	-1431.9
0.258614	0.120804	-1428.66
0.26211	0.103613	-1428.66
0.284345	0.184441	-1428.66
0.331574	0.0852373	-1428.66
0.278259	0.0572423	-1431.9
0.274613	0.0330596	-1435.14
0.192258	0.019945	-1438.38
0.203476	-0.0249349	-1438.38
0.215351	-0.0902006	-1438.38
0.263768	-0.0550237	-1428.66
0.30495	-0.0142346	-1438.38
0.174973	-0.0699687	-1438.38
0.201524	-0.221729	-1435.14
0.163866	-0.270362	-1425.42
0.188315	-0.376382	-1435.14
0.151786	-0.250121	-1435.14
0.251342	-0.16552	-1435.14
0.290491	-0.127853	-1431.9
0.324646	-0.100586	-1428.66
0.171614	0.187089	-1351.9
0.140641	0.140688	-1358.38
0.139471	0.154938	-1355.14
0.141501	0.107338	-1358.38
0.161686	0.120232	-1358.38
0.216077	0.0702593	-1348.66
0.209822	0.105769	-1351.9
0.278895	0.110872	-1351.9
0.307238	0.0797771	-1358.38
0.294198	0.0754761	-1355.14
0.23654	0.108048	-1358.38
0.309173	0.0200817	-1355.14
0.207197	-0.0965871	-1358.38
0.181753	-0.0294302	-1355.14
0.29262	-0.0895897	-1348.66
0.299763	-0.183883	-1358.38
0.285269	-0.219981	-1358.38
0.212511	-0.221628	-1355.14
0.213395	-0.187581	-1345.42
0.452668	-0.0483234	-1355.14
-0.14763	-0.0650981	-1355.14
-0.102193	-0.100482	-1348.66
-0.114111	-0.198458	-1351.9
-0.124131	-0.182978	-1351.9
-0.153945	-0.206002	-1351.9
-0.150132	-0.177744	-1355.14
-0.1422	-0.15288	-1355.14
0.325054	0.203781	-1271.9
0.234638	0.190991	-1275.14
0.167274	0.148858	-1275.14
0.110404	0.186788	-1271.9
0.0838592	0.152973	-1275.14
0.100657	0.13334	-1271.9
0.0679085	0.0674022	-1268.66
0.111741	0.0367022	-1278.38
0.127933	0.0330381	-1275.14
0.178166	0.0409577	-1271.9
0.0465551	0.00367006	-1278.38
0.198824	-0.0407217	-1271.9
0.17734	-0.0793979	-1278.38
0.190342	-0.114044	-1278.38
0.0842331	-0.204887	-1278.38
0.268985	-0.171535	-1275.14
0.240958	-0.0647387	-1268.66
0.230513	-0.0310355	-1268.66
0.278031	-0.040881	-1265.42
0.272846	0.0242055	-1278.38
0.275974	0.0565108	-1271.9
0.230488	0.0583925	-1271.9
0.220696	0.0687725	-1278.38
0.273138	0.105211	-1278.38
0.259289	0.115565	-1278.38
0.0614296	0.343328	-1278.38
0.315022	0.377715	-1275.14
-0.186038	-0.223895	-1275.14
-0.159538	-0.209093	-1271.9
-0.101807	-0.163601	-1278.38
-0.169419	-0.124813	-1268.66
-0.103351	-0.0855477	-1265.42
-0.166559	0.000465996	-1271.9
0.310004	-0.00220506	-1278.38
0.307634	0.0199887	-1271.9
-0.245509	-0.110607	-1191.9
-0.220224	-0.122481	-1185.42
-0.203221	-0.21335	-1185.42
-0.176213	-0.153438	-1185.42
-0.209761	-0.0646647	-1195.14
-0.193318	-0.0758868	-1185.42
-0.206634	-0.0416321	-1195.14
-0.151133	-0.19039	-1191.9
-0.108076	-0.191637	-1195.14
-0.110713	-0.150745	-1195.14
-0.0673768	-0.116759	-1188.66
-0.134864	-0.147053	-1185.42
0.141918	0.253104	-1195.14
0.167818	0.186837	-1191.9
0.194224	0.174028	-1195.14
0.0982636	0.127047	-1191.9
0.0706515	0.0834617	-1191.9
0.116243	0.0655893	-1195.14
0.126345	0.081087	-1191.9
0.15545	0.0723363	-1188.66
0.100366	0.0691063	-1188.66
0.077178	0.142432	-1198.38
0.287154	0.111625	-1191.9
0.303762	0.0457399	-1198.38
0.367642	0.204489	-1188.66
0.455834	0.0640569	-1195.14
0.31937	-0.0537756	-1198.38
0.267603	-0.0579313	-1188.66
0.238531	0.0215148	-1195.14
0.218002	0.0249985	-1195.14
0.301956	-0.137546	-1195.14
0.318771	-0.181092	-1191.9
0.382775	-0.148175	-1191.9
0.421414	-0.19748	-1195.14
0.35794	-0.110325	-1198.38
0.265811	-0.237185	-1191.9
0.232513	-0.249883	-1198.38
0.195731	-0.280432	-1195.14
0.221558	-0.0857164	-1188.66
0.228093	-0.0283287	-1195.14
-0.227097	-0.0176905	-1191.9
-0.0505928	0.065838	-1111.9
-0.106444	0.0200662	-1115.14
-0.170374	-0.0133387	-1108.66
-0.111611	-0.0951535	-1111.9
-0.104733	-0.117226	-1115.14
-0.140169	-0.130848	-1108.66
-0.21912	-0.180155	-1115.14
0.116791	0.147572	-1118.38
0.10443	0.16302	-1115.14
0.118656	0.16527	-1115.14
0.0471144	0.382516	-1115.14
0.216197	0.246463	-1115.14
0.287191	0.13785	-1111.9
0.253152	0.124325	-1118.38
0.22322	0.120706	-1118.38
0.215433	0.0910404	-1115.14
0.204009	0.0759911	-1115.14
0.166543	0.111502	-1111.9
0.11839	0.0956248	-1115.14
0.109726	0.0134161	-1115.14
0.0516945	-0.135322	-1115.14
0.187691	-0.131967	-1115.14
0.163263	-0.0510877	-1118.38
0.158433	-0.0382873	-1111.9
0.191352	-0.0344272	-1111.9
0.181668	-0.0239558	-1115.14
0.22174	0.0110654	-1115.14
0.235736	0.056739	-1118.38
0.242741	0.076128	-1118.38
0.266279	0.0510017	-1118.38
0.25301	0.0631717	-1118.38
0.273606	-0.0195962	-1115.14
0.309388	-0.239738	-1118.38
0.264666	-0.239794	-1038.38
0.286845	-0.35927	-1038.38
0.270494	0.0124915	-1035.14
0.299893	0.0288644	-1038.38
0.310274	0.0296255	-1031.9
0.362585	0.0328994	-1038.38
0.345889	0.171193	-1031.9
0.260661	0.13693	-1031.9
0.200709	0.154897	-1038.38
0.230103	0.107672	-1038.38
0.202061	0.0827214	-1035.14
0.198175	0.0694398	-1038.38
0.170543	0.0790756	-1035.14
0.119811	0.145819	-1035.14
0.070633	0.109878	-1038.38
0.102542	0.039007	-1038.38
0.112214	0.0297408	-1038.38
0.11173	-0.0239587	-1035.14
0.167942	-0.0391521	-1035.14
0.159492	-0.0580702	-1035.14
0.182814	-0.0563683	-1035.14
-0.119557	-0.137656	-1031.9
-0.104143	-0.148164	-1028.66
-0.100728	-0.126045	-1028.66
-0.167741	-0.111883	-1031.9
-0.197751	-0.109466	-1031.9
-0.163261	-0.171461	-1031.9
-0.14516	-0.241655	-1028.66
0.187287	0.356902	-1031.9
0.126847	0.38856	-1031.9
-0.319278	0.194714	-948.66
-0.26791	0.209891	-945.42
-0.207051	0.0793115	-948.66
-0.167545	-0.148447	-951.9
-0.164214	-0.178866	-948.66
-0.135539	-0.116125	-948.66
-0.172638	-0.207168	-948.66
0.240625	-0.312346	-955.14
0.254815	-0.316967	-958.38
0.385578	-0.239892	-958.38
0.282972	-0.183723	-955.14
0.310483	-0.157581	-948.66
0.290893	-0.129527	-951.9
0.252635	-0.0679448	-958.38
0.225546	-0.0633502	-951.9
0.173104	-0.0384823	-955.14
0.149122	0.0173585	-951.9
0.181116	0.0548777	-951.9
0.194902	0.059082	-955.14
0.1884	0.0222479	-955.14
0.233452	0.0777991	-955.14
0.262436	0.0555875	-955.14
0.216152	0.152969	-951.9
0.111021	0.225064	-955.14
0.0801346	0.0347091	-948.66
0.160771	-0.0280893	-948.66
0.316106	0.0406171	-948.66
0.271778	0.0906247	-955.14
0.184338	0.114912	-948.66
0.285641	0.129698	-955.14
0.0712977	0.385096	-955.14
0.190387	0.382199	-945.42
0.19409	-0.036046	-958.38
0.305643	0.166626	-948.66
0.111418	0.159298	-955.14
0.30117	-0.0948224	-958.38
-0.101772	-0.159922	-878.38
-0.0977279	-0.196859	-865.42
-0.121233	-0.211044	-875.14
-0.125433	-0.275252	-875.14
-0.0755514	-0.184271	-878.38
-0.0268729	-0.10415	-878.38
-0.023127	-0.073442	-878.38
-0.272638	0.166893	-868.66
0.274488	-0.329444	-871.9
0.283368	-0.394703	-875.818
0.412171	-0.397158	-877.061
0.333375	-0.437737	-875.528
0.233071	-0.315155	-868.66
0.257706	-0.273798	-871.9
0.541859	-0.273002	-878.17
0.253162	-0.142052	-875.14
0.257972	-0.112973	-871.9
0.27073	-0.0790158	-875.14
0.305621	0.00470055	-878.38
0.322939	-0.0206265	-878.38
0.426191	0.0808563	-877.821
0.255031	0.253008	-865.42
0.122313	0.228544	-878.38
0.0894329	0.281076	-868.66
0.165803	0.152742	-875.14
0.181674	0.111252	-875.14
0.170734	0.0934506	-875.14
0.179279	0.0738039	-868.66
0.17807	0.0367024	-875.14
0.168185	0.0111653	-875.14
0.125778	-0.0365564	-871.9
0.114578	0.0469861	-878.38
0.203351	-0.027558	-878.38
0.200748	-0.0420553	-878.38
0.224752	0.0500175	-878.38
0.225634	0.102799	-878.38
0.275335	0.186063	-876.397
0.342963	0.000582092	-863.886
0.244141	0.0798229	-868.062
0.190054	-0.096262	-878.38
0.246175	-0.269319	-866.435
-0.319354	0.188656	-788.66
-0.171337	0.0275596	-791.9
-0.182041	-0.118837	-791.9
-0.135793	-0.135831	-791.9
-0.123935	-0.136663	-795.14
-0.102	-0.146877	-785.42
-0.0898528	-0.130282	-788.66
-0.106602	-0.127011	-798.38
-0.108576	-0.234998	-791.9
-0.11126	-0.189256	-795.14
-0.0625134	-0.0554782	-795.14
-0.161348	-0.0674256	-785.42
-0.120478	-0.0590801	-788.66
0.0678752	0.0186558	-798.38
0.0502334	-0.0025276	-795.14
0.0515003	-0.0621622	-788.66
0.148696	-0.0429561	-791.9
0.151896	-0.0189928	-795.14
0.140495	-0.154933	-788.66
0.214388	0.00837692	-798.38
0.222408	-0.0471172	-795.14
0.24804	-0.0718462	-788.66
0.267668	-0.0828775	-791.9
0.271774	-0.147768	-795.14
0.27988	-0.165456	-791.9
0.236463	-0.238069	-795.14
0.163042	-0.286637	-791.9
0.351781	-0.348553	-785.42
0.326433	-0.241494	-791.9
0.330751	-0.183271	-788.66
0.318467	-0.138248	-788.66
0.322505	-0.0426063	-795.14
0.34568	-0.0011768	-795.14
0.323124	0.00491691	-785.42
0.312367	0.0157415	-791.9
0.318494	0.0357756	-785.42
0.3431	0.0705522	-791.9
0.311136	0.185168	-788.66
0.0819313	0.158573	-798.38
0.131014	0.165809	-785.42
0.154964	0.158567	-798.38
0.160344	0.169223	-795.14
0.198401	0.159116	-798.38
0.13824	0.113066	-798.38
0.114012	0.0967452	-791.9
0.0908611	0.0857383	-795.14
0.164182	0.0626591	-798.38
0.130974	0.0475562	-798.38
0.158317	0.0333655	-798.38
0.209404	0.0641783	-791.9
0.205379	0.0823983	-798.38
0.230876	0.0743966	-798.38
0.251322	0.108886	-798.38
0.31018	-0.192251	-788.66
0.185198	0.0287568	-798.38
-0.0987973	0.0912952	-708.659
-0.091417	-0.139058	-708.658
-0.0906683	-0.175124	-708.658
-0.106585	-0.167122	-711.898
-0.124472	-0.16214	-711.898
-0.150019	-0.195249	-708.657
-0.151735	-0.260354	-715.137
-0.115637	-0.246295	-708.658
-0.110125	-0.206201	-711.898
0.0557859	0.290631	-711.902
0.0565119	0.303825	-711.902
0.122899	0.206293	-718.383
0.139187	0.207193	-718.383
0.124625	0.145597	-715.142
0.0929786	0.134114	-711.902
0.0853981	0.131475	-715.142
0.0794775	0.128829	-715.142
0.0609817	0.115612	-715.141
0.0912697	0.178979	-715.142
0.142256	0.108685	-718.383
0.141563	0.0664648	-718.382
0.154327	0.0682312	-715.143
0.0901267	0.0338399	-711.902
0.0294563	-0.00634134	-711.9
0.126029	0.0303489	-705.422
0.17699	-0.0153402	-708.663
0.206055	-0.0236449	-705.423
0.219309	0.0418988	-705.424
0.207087	0.0577332	-711.903
0.193542	0.0929074	-715.143
0.203164	0.0964376	-715.144
0.236515	0.0674534	-715.144
0.283492	0.0921222	-708.665
0.344926	0.111549	-708.666
0.397373	0.0606075	-711.907
0.458037	-0.0541485	-715.147
0.306502	-0.116814	-711.905
0.311288	-0.0826364	-718.385
0.28695	-0.341774	-708.663
0.303808	-0.34841	-711.904
0.260931	-0.406775	-711.903
0.289979	-0.400085	-708.663
0.253253	-0.170193	-711.904
0.256511	-0.0951972	-718.384
0.295821	0.00067968	-715.145
0.43356	-0.347434	-708.666
0.301597	-0.0468588	-705.425
-0.106609	-0.131183	-628.66
-0.109429	-0.101178	-625.42
-0.120798	-0.16941	-625.42
-0.126026	-0.222699	-628.66
-0.160783	-0.193808	-625.42
-0.143884	0.0522193	-631.9
-0.285042	0.166915	-625.42
0.160409	0.392538	-625.42
0.190639	0.178185	-628.66
0.26804	0.1717	-631.9
0.264498	0.21427	-635.14
0.149303	0.197144	-628.66
0.135611	0.167601	-638.38
0.118161	0.163317	-635.14
0.131279	0.135888	-638.38
0.179014	0.147984	-625.42
0.195646	0.0911257	-635.14
0.233472	0.102456	-628.66
0.265148	0.0660236	-631.9
0.281034	0.107308	-635.14
0.232112	0.0409574	-631.9
0.224361	0.0661811	-625.42
0.244424	0.024722	-635.14
0.250266	-0.0180367	-625.42
0.284007	-0.0126906	-635.14
0.285589	-0.0435119	-635.14
0.18509	-0.031395	-635.14
0.153434	0.0100141	-631.9
0.125023	0.0128475	-628.66
0.102346	-0.0154942	-635.14
0.137774	-0.0320556	-635.14
0.121206	0.0643881	-635.14
0.110365	0.0850124	-625.42
0.107074	0.110875	-625.42
0.0989126	0.127264	-631.9
0.269374	-0.0897652	-635.14
0.289342	-0.090665	-638.38
0.319326	-0.0810767	-625.42
0.167772	-0.0849951	-628.66
0.201736	-0.124348	-625.42
0.246306	-0.184372	-625.42
0.202856	-0.266424	-635.14
0.222078	-0.347782	-625.42
0.296216	-0.23298	-631.9
0.433217	-0.195945	-631.9
0.370339	-0.452206	-635.14
0.363799	-0.410699	-625.42
0.385863	-0.361837	-635.14
0.203357	0.261123	-551.9
0.172657	0.244563	-555.14
0.1511	0.239872	-555.14
0.127338	0.231132	-551.9
0.137571	0.219523	-555.14
0.160118	0.18182	-555.14
0.1674	0.19994	-555.14
0.216954	0.174959	-555.14
0.123968	0.0979939	-551.9
0.103928	0.0905268	-555.14
0.109827	0.0776104	-555.14
0.119966	0.0314088	-555.14
-0.149853	-0.0260782	-551.9
-0.0902061	-0.0412044	-548.66
-0.160764	-0.130401	-545.42
-0.130901	-0.206282	-545.42
-0.121145	-0.214019	-545.42
-0.111378	-0.222556	-545.42
-0.121071	-0.244947	-548.66
-0.168406	-0.293687	-544.074
0.166305	0.0236236	-551.9
0.189644	0.0103048	-558.38
0.153681	-0.0287813	-545.42
0.261575	-0.0378558	-545.42
0.223832	-0.00738704	-545.42
0.298353	0.0767991	-549.662
0.251896	0.0759586	-551.9
0.223338	0.0856323	-555.14
0.216173	0.0636067	-548.66
0.197238	0.0923511	-555.14
0.184904	0.0977375	-551.9
0.108793	0.151773	-551.9
0.124023	0.174975	-558.38
0.291491	0.136184	-546.974
0.367057	0.121675	-543.987
0.365893	-0.152662	-545.821
0.330213	-0.218102	-556.481
0.259702	-0.222082	-545.42
0.206143	-0.312731	-551.491
0.386348	-0.32758	-544.054
0.43521	-0.252359	-549.328
0.314563	-0.388146	-546.451
0.2901	-0.390917	-542.495
0.141492	-0.114854	-545.42
0.259186	-0.0837947	-545.42
0.0403696	-0.00301935	-548.66
0.212272	-0.231	-471.9
0.214637	-0.282525	-475.14
0.211907	-0.341584	-471.9
0.275213	-0.380616	-468.66
0.227814	-0.374848	-475.14
0.314338	-0.363021	-475.14
0.433181	-0.330325	-475.14
0.35571	-0.249018	-471.9
0.312529	-0.105411	-471.9
0.251569	-0.0964166	-475.14
0.228222	-0.122445	-468.66
0.230631	-0.0321514	-465.42
0.307884	0.0307688	-471.9
0.347111	0.0819319	-468.66
0.379603	0.0966672	-465.42
0.411696	0.0293717	-471.9
0.405581	0.121186	-475.14
0.43067	0.135098	-475.14
0.362765	0.132306	-468.66
0.336264	0.17478	-468.66
0.289221	0.15213	-475.14
0.243851	0.158881	-471.9
0.290617	0.206616	-468.66
0.234251	0.108777	-471.9
0.218443	0.116613	-475.14
0.266776	0.0668314	-475.14
0.198349	0.0223865	-475.14
0.144349	0.0438064	-471.9
0.126574	0.0319848	-475.14
0.160052	-0.0188662	-475.14
0.115685	-0.0219033	-475.14
0.046856	0.00133776	-475.14
0.116671	0.099284	-475.14
0.0855606	0.0848422	-471.9
0.112168	0.129943	-475.14
0.148521	0.148381	-478.38
0.170783	0.166424	-475.14
0.0892821	0.183376	-478.38
0.107769	0.213525	-468.66
0.141654	0.225832	-471.9
0.157784	0.263924	-468.66
-0.071891	-0.111411	-465.42
-0.109273	-0.161421	-465.42
-0.141865	-0.160357	-468.66
-0.138404	-0.127238	-468.66
-0.148485	-0.106477	-475.14
-0.20735	-0.149309	-471.9
-0.299083	-0.0153262	-465.42
-0.156663	-0.305111	-478.38
0.132647	0.28715	-471.9
0.263486	0.119864	-471.9
0.311736	0.0723372	-471.9
0.238557	0.320723	-393.409
-0.0469029	0.0029755	-397.587
-0.00181878	-0.0659821	-384.453
-0.0848999	-0.0967392	-392.878
-0.0973525	-0.118377	-394.271
-0.10961	-0.125096	-390.709
-0.164127	-0.120491	-383.574
-0.0978002	-0.178007	-390.004
-0.118421	-0.212231	-392.017
-0.139282	-0.245994	-384.732
-0.174207	-0.21178	-392.177
-0.19592	-0.221341	-383.101
-0.195623	-0.214846	-383.945
-0.0608673	-0.213919	-391.953
-0.227363	0.18382	-394.704
0.048214	0.0555895	-392.021
0.0507226	0.06606	-389.447
-0.0316714	0.0688494	-383.848
0.0556489	0.0400098	-392.011
0.115494	0.0945874	-385.714
0.0450878	0.170313	-397.192
0.0838146	0.169541	-393.65
0.115031	0.158546	-389.668
0.138186	0.188837	-389.861
0.174485	0.152734	-383.266
0.23826	0.202774	-382.92
0.285936	0.15853	-384.193
0.314617	0.166077	-382.482
0.283578	0.139789	-391.679
0.280025	0.128258	-392.963
0.294422	0.119142	-396.974
0.220527	0.1161	-389.645
0.209403	0.0828221	-389.446
0.176124	0.0880131	-394.191
0.193493	0.0898914	-382.616
0.189119	0.115555	-396.057
0.179685	0.109219	-397.357
0.271147	0.0750161	-384.604
0.246233	0.0269851	-389.953
0.331703	0.0472455	-387.585
0.385815	0.0319637	-397.797
0.399797	0.0928007	-382.768
0.190168	0.00607857	-395.282
0.167972	0.00355028	-384.941
0.128494	0.00928805	-388.038
0.110731	0.0345308	-396.011
0.125448	0.0392763	-391.594
0.146119	0.0554164	-397.702
0.149826	0.0678908	-391.239
0.199974	0.0557599	-382.663
0.232027	-0.052611	-394.575
0.232976	-0.133277	-385.996
0.274176	-0.0741998	-395.228
0.168141	-0.214581	-393.213
0.165827	-0.171937	-383.783
0.209662	-0.337277	-386.471
0.242528	-0.307953	-389.323
0.421846	-0.376109	-391.135
0.300642	-0.000778492	-390.402
0.413493	0.0260187	-391.984
-0.195289	-0.162182	-383.007
0.299825	0.320177	-308.66
0.221434	0.359312	-305.42
0.138652	0.25466	-308.66
0.148357	0.182738	-311.9
0.204557	0.196477	-308.66
0.227582	0.195813	-315.14
0.235359	0.210679	-315.14
0.24969	0.192908	-315.14
0.228208	0.220514	-311.9
0.196129	0.227332	-311.9
0.0719496	0.0932413	-318.38
0.0832397	0.11341	-315.14
0.162742	0.133146	-311.9
0.163713	0.113588	-311.9
0.155227	0.0672437	-315.14
0.131939	0.0777711	-311.9
0.111786	0.0113633	-308.66
0.0527816	0.00822651	-311.9
0.0402289	0.0356253	-311.9
0.00784567	0.0539296	-311.9
0.14992	-0.000936789	-315.14
0.143977	0.00875188	-315.14
0.191191	-0.00228713	-315.14
0.16882	-0.00516774	-318.38
0.189301	-0.0587725	-315.14
0.179766	0.0649458	-318.38
0.223995	0.0756595	-315.14
0.286236	0.0774392	-315.14
0.260351	0.120526	-308.66
0.292138	0.116121	-311.9
0.287042	0.106623	-315.14
0.30397	0.128615	-311.9
0.317247	0.154771	-311.9
0.290348	0.136693	-315.14
0.355364	0.0892703	-315.14
0.342393	0.0516276	-315.14
0.288456	0.0505371	-315.14
0.306784	0.00994032	-308.66
0.278525	0.000552104	-311.9
0.267693	0.0071019	-311.9
0.273539	-0.042554	-315.14
0.249236	-0.0419814	-308.66
0.250359	-0.0708123	-305.42
0.261398	-0.0972689	-308.66
0.257649	-0.116921	-315.14
0.339237	-0.0185968	-311.9
0.329531	-0.0190074	-315.14
0.324366	-0.00275889	-315.14
0.36816	-0.13949	-315.14
0.350486	-0.00651234	-311.9
0.388598	-0.217714	-315.14
0.245036	-0.232036	-315.14
0.28239	-0.272659	-315.14
0.304164	-0.2715	-315.14
0.404703	-0.322037	-315.14
0.422269	-0.331388	-311.9
0.252586	-0.341954	-315.14
0.20157	-0.259382	-315.14
-0.139171	-0.189296	-305.42
-0.152477	-0.189404	-308.66
-0.166486	-0.239363	-311.9
-0.0973668	-0.202314	-305.42
-0.108088	-0.154914	-311.9
-0.0631422	-0.169855	-311.9
-0.0431752	-0.143537	-305.42
-0.100282	-0.0875785	-315.14
-0.115523	-0.0675155	-315.14
-0.0617115	-0.050978	-305.42
-0.0922698	0.0298724	-305.42
-0.210256	0.00613569	-311.9
-0.249151	0.0269328	-311.9
-0.197843	0.0476119	-311.9
0.195738	0.169742	-311.9
0.0984487	0.177376	-318.38
0.279368	0.245209	-318.38
0.410191	-0.237152	-311.9
0.146619	0.28465	-228.66
0.214341	0.27332	-228.66
0.252048	0.361015	-231.9
0.252951	0.279972	-231.9
0.134092	0.368301	-231.9
0.10405	0.379971	-228.66
0.114332	0.40861	-228.66
0.0668988	0.324169	-228.66
0.0970659	0.165928	-235.14
0.0883942	0.153049	-235.14
0.0799469	0.134305	-231.9
0.0701444	0.175062	-235.14
0.0661841	0.0818217	-235.14
0.0640167	0.0618153	-235.14
0.0573749	0.0761986	-235.14
0.129701	0.0689524	-228.66
0.168885	0.0730164	-235.14
0.177515	0.0939392	-231.9
0.230009	0.113152	-231.9
0.250316	0.122818	-228.66
0.240979	0.145011	-228.66
0.288472	0.131637	-225.42
0.318996	0.122216	-231.9
0.33416	0.100927	-228.66
0.395492	0.090677	-228.66
0.43116	0.0845658	-231.9
0.336444	0.0477391	-228.66
0.304064	0.0642647	-235.14
0.290752	0.0609702	-235.14
0.272916	0.0612133	-235.14
0.29653	-0.0394493	-231.9
0.229599	-0.0295052	-228.66
0.2763	0.0171221	-235.14
0.289102	0.0137522	-235.14
0.263626	0.0138403	-235.14
0.159485	0.0373151	-231.9
0.186195	0.0334423	-235.14
0.1093	-0.0827675	-235.14
0.0319701	0.00551175	-235.14
0.0458427	0.0186769	-231.9
0.0901507	0.100031	-231.9
0.346986	-0.164038	-235.14
0.231315	-0.304731	-225.42
0.223501	-0.344272	-231.9
0.240231	-0.360613	-235.14
0.225876	-0.377446	-235.14
0.271213	-0.384368	-235.14
0.337911	-0.294837	-231.9
0.333126	-0.239454	-231.9
0.347131	-0.239144	-231.9
-0.0353777	-0.105516	-228.66
-0.0730372	-0.0562623	-228.66
-0.0903412	0.0143202	-231.9
-0.0627398	0.103607	-231.9
-0.10163	-0.128823	-228.66
-0.143209	-0.163532	-225.42
-0.25889	-0.108042	-225.42
-0.0936101	-0.177917	-225.42
-0.133199	-0.0987261	-148.66
-0.112565	-0.13305	-151.9
-0.0749678	-0.0942237	-158.38
-0.00736128	-0.0657401	-155.14
-0.105055	-0.185569	-158.38
-0.109661	-0.238871	-145.42
-0.112935	0.0637085	-151.9
-0.252518	0.144179	-148.66
0.00517017	0.0748943	-155.14
0.0303457	0.0682962	-158.38
0.100816	0.0630098	-151.9
0.114427	0.0366651	-155.14
0.196055	-0.0485436	-158.38
0.272516	-0.00266553	-158.38
0.293834	0.02355	-158.38
0.320843	0.0337858	-158.38
0.31571	0.00089144	-158.38
0.330453	-0.0184551	-148.66
0.372252	-0.0212658	-151.9
0.262047	-0.161248	-158.38
0.333373	-0.164055	-155.14
0.339754	-0.196048	-155.14
0.341102	-0.210514	-155.14
0.172309	-0.339653	-158.38
0.19915	-0.316509	-158.38
0.2159	0.0123372	-151.9
0.20917	0.030894	-155.14
0.288351	0.106978	-158.38
0.471174	0.108623	-151.9
0.252547	0.114058	-158.38
0.156195	0.148332	-151.9
0.140085	0.188303	-151.9
0.20045	0.209155	-151.9
0.0846731	0.289613	-151.9
0.111837	0.32217	-148.66
0.154533	0.401293	-155.14
0.088417	0.15755	-158.38
0.284277	-0.325775	-158.38
0.393192	-0.036704	-151.9
0.393157	-0.0936065	-158.38
0.42798	-0.143571	-158.38
0.458474	-0.273951	-158.38
0.24871	0.254097	-75.14
0.232604	0.188678	-78.38
0.281471	0.197049	-78.38
0.316228	0.179216	-78.38
0.276443	0.225713	-68.66
0.145123	0.231912	-78.38
0.12823	0.224048	-75.14
0.0689318	0.221742	-78.38
0.107446	0.151431	-71.9
0.155012	0.138799	-75.14
0.175388	0.14596	-78.38
0.181124	0.133766	-78.38
0.197105	0.0858158	-75.14
0.132995	0.0572325	-78.38
0.0989625	0.0980025	-78.38
0.121616	0.0964661	-78.38
0.21393	-0.0134363	-75.14
0.224427	-0.00544114	-78.38
0.264072	0.0156639	-78.38
0.325568	-0.00114607	-78.38
0.331425	0.0063365	-78.38
0.305775	0.0855962	-75.14
0.283162	0.0938795	-75.14
0.327894	0.0927434	-78.38
0.363275	0.0778864	-68.66
0.416305	-0.0898676	-78.38
0.385049	-0.170776	-78.38
0.266822	-0.21663	-78.38
0.24092	-0.172446	-78.38
0.243362	-0.151611	-78.38
0.234658	-0.149297	-78.38
0.224014	-0.183363	-75.14
0.257122	-0.288051	-78.38
0.271318	-0.349799	-71.9
-0.104602	0.0573311	-75.14
-0.147166	-0.0390177	-71.9
-0.248733	-0.105691	-75.14
-0.173077	-0.125509	-78.38
-0.170102	-0.192231	-75.14
-0.110881	-0.183698	-75.14
-0.091685	-0.212834	-78.38
-0.0564969	-0.147138	-78.38
-0.0884406	-0.123191	-75.14
-0.117898	-0.15099	-75.14
-0.140618	-0.264628	-75.14
-0.184183	-0.240673	-75.14
0.260942	-0.125701	-78.38
0.202207	0.163783	1.62
0.204167	0.182168	11.34
0.180744	0.155234	4.86
0.189298	0.13635	8.1
0.178693	0.117874	4.86
0.168536	0.112327	1.62
0.207372	0.422704	11.34
0.0593817	0.269779	4.86
0.140786	0.234	8.1
0.127648	0.123941	1.62
0.141124	0.0903946	1.62
0.193164	0.0663961	4.86
0.18072	0.0751732	1.62
0.237142	0.105421	1.62
0.228894	0.121129	8.1
0.258085	0.148079	1.62
0.250425	0.159454	1.62
0.27837	0.151243	1.62
0.266051	0.0426649	1.62
0.284204	-0.0294186	1.62
0.238184	-0.0352062	1.62
0.313201	-0.0134518	4.86
0.326136	0.0191244	1.62
0.141474	0.0322515	1.62
0.164192	0.0512443	1.62
0.00799325	0.103548	1.62
-0.0441929	0.0674804	11.34
-0.0537831	0.0807791	8.1
0.0722458	-0.0362854	8.1
0.152187	-0.221336	1.62
0.193685	-0.274958	1.62
0.244121	-0.336786	1.62
0.323096	-0.268604	1.62
0.305463	-0.446899	1.62
-0.0873018	-0.202296	1.62
-0.0713347	-0.171254	4.86
-0.17984	-0.163934	1.62
0.262783	0.0835702	8.1
-0.0990255	-0.103797	4.86
-0.115741	-0.149951	11.34
-0.143371	-0.234499	1.62
-0.151231	-0.243029	94.58
-0.154161	-0.227575	94.58
-0.172315	-0.103178	94.58
-0.1237	-0.0305834	84.86
-0.0843583	-0.204543	88.1
-0.170067	0.0634751	84.86
-0.000298606	0.131958	81.62
0.00762398	-0.0710783	88.1
0.0366055	-0.000114261	81.62
0.0657423	0.0851341	81.62
0.0935015	0.0779199	81.62
0.0532017	0.117009	81.62
0.129886	0.123273	81.62
0.125281	0.159833	81.62
0.104129	0.16308	81.62
0.161035	0.142393	84.86
0.170229	0.156671	81.62
0.186158	0.14847	84.86
0.147092	0.155257	81.62
0.14054	0.252325	81.62
0.105768	0.343797	91.34
0.118187	0.339081	84.86
0.172398	0.350583	84.86
0.252393	0.134852	91.34
0.221181	0.127982	84.86
0.241781	0.192283	88.1
0.19224	0.136628	91.34
0.211394	0.110097	91.34
0.25037	0.0690083	91.34
0.231789	0.0638999	88.1
0.225152	0.0206499	88.1
0.202539	0.0211261	81.62
0.169573	0.0486574	84.86
0.162225	0.0382697	81.62
0.121928	0.080684	81.62
0.129851	0.0654174	81.62
0.122766	0.0299733	91.34
0.179373	-0.0337363	81.62
0.240464	-0.038912	94.58
0.264858	-0.0270408	91.34
0.239016	-0.0104998	88.1
0.213239	-0.00572062	88.1
0.156266	-0.115752	84.86
0.236277	-0.205463	88.1
0.261402	-0.193116	88.1
0.336107	-0.0358262	84.86
0.400299	-0.0309879	88.1
0.381768	-0.217392	91.34
0.314318	0.0126085	84.86
0.404129	-0.309939	88.1
0.394166	-0.264778	84.86
0.391517	-0.416036	88.1
0.273804	-0.372987	84.86
-0.077145	-0.122634	94.58
0.263125	0.190253	171.34
0.292098	0.169579	171.34
0.250025	0.157754	174.58
0.243807	0.132854	168.1
-0.143544	-0.222512	164.86
-0.127509	-0.219954	161.62
-0.146732	-0.271138	171.34
-0.0892688	-0.167303	161.62
-0.107674	-0.128413	161.62
-0.0644239	-0.0817612	164.86
-0.126374	-0.0975602	164.86
-0.134301	-0.110547	171.34
-0.140053	-0.0604585	174.58
-0.189718	-0.101218	174.58
-0.155089	0.0444405	161.62
0.027572	0.137771	161.62
0.075429	0.17331	161.62
0.090867	0.128946	164.86
0.167748	0.146325	164.86
0.210097	0.120993	164.86
0.0791549	0.287523	168.1
0.157167	0.0767515	164.86
0.0747441	0.0474107	171.34
0.0584382	-0.0374723	161.62
0.217921	0.0227771	164.86
0.249973	0.0234799	161.62
0.26227	0.0665556	164.86
0.241934	0.0600323	164.86
0.228413	0.0879523	164.86
0.333784	0.0807691	171.34
0.332785	0.0313148	161.62
0.356082	0.0325642	171.34
0.31532	0.0153067	161.62
0.387454	0.0603108	168.1
0.293496	0.117564	161.62
0.27535	0.1286	161.62
0.307569	-0.0410397	171.34
0.24457	-0.0489787	168.1
0.263229	-0.0789899	164.86
0.255128	-0.12223	164.86
0.303528	-0.120407	164.86
0.315933	-0.122782	161.62
0.332022	-0.113007	161.62
0.356583	-0.0622442	164.86
0.369612	-0.0524019	164.86
0.414478	-0.10123	168.1
0.272063	-0.204377	164.86
0.314942	-0.273351	164.86
0.267359	-0.34553	171.34
0.250182	-0.335598	164.86
0.406477	-0.208877	168.1
-0.118104	-0.190294	248.1
-0.133646	-0.21855	248.1
-0.141061	-0.149786	244.86
-0.0833358	-0.131014	251.34
-0.0684261	-0.125363	251.34
-0.0813962	-0.0397532	248.1
-0.134002	-0.0607785	241.62
-0.15458	-0.0861558	244.86
-0.213928	-0.181181	251.34
-0.201981	-0.235936	248.1
-0.302216	0.0193738	248.1
-0.023192	0.110787	241.62
-0.0180791	-0.0158411	251.34
0.102608	0.00115815	241.62
0.161986	0.00784061	248.1
0.153997	0.0485929	248.1
0.128954	0.0459122	241.62
0.134189	0.0906859	248.1
0.068803	0.115233	251.34
0.103583	0.124334	244.86
0.0914566	0.178154	241.62
0.102137	0.182988	241.62
0.162436	0.248302	244.86
0.224316	0.21692	244.86
0.259424	0.15118	248.1
0.255522	0.127351	241.62
0.179849	0.132354	241.62
0.192026	0.0983438	241.62
0.201385	0.0710527	244.86
0.226757	0.0752223	241.62
0.261692	0.0804514	241.62
0.29478	0.119954	251.34
0.28645	0.0561013	244.86
0.311467	0.0550843	251.34
0.347366	0.0679597	241.62
0.268249	0.005196	241.62
0.225713	-0.000819948	244.86
0.222387	0.0177683	248.1
0.178383	-0.018598	248.1
0.237301	-0.0579387	248.1
0.227369	-0.106913	241.62
0.246372	-0.109507	244.86
0.33304	-0.0871806	251.34
0.367451	-0.123653	241.62
0.427813	-0.14957	248.1
0.4439	-0.129273	248.1
0.462309	-0.218216	248.1
0.377539	-0.352267	248.1
0.288408	-0.204025	244.86
0.279917	-0.0683824	251.34
0.26433	-0.0572708	241.62
-0.284379	0.168933	328.1
-0.241779	0.196745	321.62
-0.240441	0.0494942	328.1
-0.284581	0.032497	334.58
-0.313657	-0.113315	324.86
-0.110952	-0.223667	321.62
-0.0834681	-0.210696	321.62
-0.0946984	-0.184271	321.62
-0.0529861	-0.142978	321.62
-0.0285889	-0.0998752	321.62
0.00489587	-0.0580529	321.62
-0.0860236	0.0570406	334.58
-0.0214446	0.0730798	331.34
0.00409944	0.131093	321.62
0.0622062	0.253777	328.1
0.110949	0.219542	331.34
0.131657	0.253445	334.58
0.17738	0.216528	328.1
0.245459	0.179134	321.62
0.251168	0.258202	331.34
0.26359	0.164921	331.34
0.225383	0.147833	321.62
0.199201	0.14168	324.86
0.19408	0.153424	321.62
0.177923	0.115977	321.62
0.156708	0.100567	321.62
0.0958393	0.0661276	321.62
0.168008	0.00984734	321.62
0.195971	-0.00720539	321.62
0.232296	-0.00646019	321.62
0.243097	-0.0366195	328.1
0.176538	-0.130384	321.62
0.308778	0.0546599	321.62
0.23899	0.0597183	324.86
0.226647	0.0960968	324.86
0.345835	0.0958403	331.34
0.382554	0.105048	324.86
0.394454	0.0405119	328.1
0.374398	0.0502595	331.34
0.43847	0.139004	328.1
0.370477	-0.146147	321.62
0.176844	-0.353062	324.86
0.246142	-0.352924	324.86
-0.16525	-0.234584	411.34
-0.163602	-0.19109	408.1
-0.169273	-0.194228	414.58
-0.13786	-0.193806	414.58
-0.11987	-0.206849	404.86
-0.104343	-0.205829	411.34
-0.0864934	-0.230213	414.58
-0.0630912	-0.160261	408.1
-0.106268	-0.124485	404.86
-0.0557345	-0.0824476	404.86
-0.150615	-0.0455226	404.86
-0.129105	-0.0242669	414.58
-0.014774	0.0599889	404.86
-0.048173	0.241206	411.34
-0.209494	0.232524	408.1
0.033486	0.0432607	404.86
0.0393876	0.0395943	408.1
0.0933989	0.117319	401.62
0.13687	0.110571	404.86
0.161333	0.124929	404.86
0.203384	0.179659	411.34
0.204458	0.209109	414.58
0.267128	0.141498	408.1
0.219356	0.110893	404.86
0.204107	0.119485	401.62
0.21017	0.0829607	401.62
0.21931	0.0625577	401.62
0.200543	0.0531238	404.86
0.154762	0.0395834	408.1
0.254068	0.0825268	404.86
0.307087	0.131201	401.62
0.355227	0.120358	401.62
0.320749	0.163056	401.62
0.411094	0.129786	411.34
0.421589	0.0767539	411.34
0.298772	0.0483033	408.1
0.278343	0.00614182	401.62
0.240616	-0.0320513	411.34
0.362598	0.00862395	408.1
0.331744	0.0445347	408.1
0.422136	-0.0823208	408.1
0.410388	-0.0740149	404.86
0.389013	-0.101316	404.86
0.310588	-0.131668	404.86
0.36015	-0.189253	401.62
0.447535	-0.203085	401.62
0.269813	-0.342811	404.86
0.284289	-0.403246	404.86
0.332035	-0.369933	401.62
0.172502	-0.354128	401.62
0.16526	0.0707597	481.62
0.25019	0.128003	481.62
0.251834	0.150786	481.62
0.210542	0.12405	481.62
0.195246	0.117332	481.62
0.149423	0.166039	484.86
0.0785964	0.251874	488.1
0.0775938	0.399907	491.34
0.119277	0.446222	488.1
0.352127	0.219832	488.1
0.359133	0.185181	491.34
0.364159	0.0727436	481.62
0.320596	0.0504763	491.34
0.300248	0.01875	481.62
0.299863	-0.0333909	491.34
0.422254	-0.0991399	484.86
0.315141	-0.178945	481.62
0.342287	-0.212526	481.62
0.403504	-0.237786	484.86
0.355684	-0.381461	484.86
0.330112	-0.378921	484.86
0.321987	-0.397812	484.86
0.314866	-0.352308	481.62
0.228087	-0.373095	488.1
0.139284	-0.243258	481.62
0.0999433	-0.0715956	484.86
0.0346913	-0.0161462	481.62
0.0628911	0.0478587	481.62
0.0255735	0.0717959	488.1
-0.0149933	0.12758	484.86
-0.0428156	-0.0412185	481.62
-0.0672344	-0.095103	484.86
-0.101059	-0.119964	481.62
-0.116198	-0.122983	484.86
-0.130718	-0.16706	491.34
-0.292794	-0.130995	491.34
-0.325135	0.0492521	491.34
-0.261271	0.0718945	494.58
-0.216118	0.154957	484.86
0.4342	0.0845011	564.86
0.373928	0.0969705	564.86
0.267478	0.254379	561.62
0.228071	0.128729	564.86
0.210302	0.129565	568.1
0.209779	0.148138	561.62
0.181692	0.153631	561.62
0.18001	0.173793	561.62
0.15036	0.16449	564.86
0.113414	0.215547	561.62
0.141467	0.224973	574.58
0.0838598	0.216218	561.62
0.119164	0.141087	571.34
0.0994755	0.0914009	564.86
0.115107	0.0452504	564.86
0.119477	0.0266767	561.62
0.0397869	0.0254491	564.86
0.0311566	0.046721	561.62
0.0207748	0.0795685	561.62
-0.016708	0.117425	561.62
-0.0524615	0.133477	564.86
0.0582722	-0.0189014	564.86
0.0963571	-0.0649053	574.58
0.157072	6.4571e-05	571.34
0.195334	0.00205796	561.62
0.26135	-0.00307476	564.86
0.206029	0.0587129	561.62
0.297652	0.0265379	564.86
0.313981	0.0222643	561.62
0.308436	0.0563898	561.62
0.344333	-0.0111245	561.62
0.291565	-0.0631877	571.34
0.295222	-0.0304282	561.62
0.206979	-0.0578949	568.1
0.253302	-0.318984	571.34
0.236581	-0.372495	568.1
-0.146757	-0.145165	568.1
-0.181139	-0.0620501	568.1
-0.120581	-0.0386729	571.34
-0.112161	-0.161327	564.86
-0.0851772	-0.186217	574.58
-0.107212	-0.24094	564.86
-0.125703	-0.222943	561.62
-0.143418	-0.267229	574.58
-0.239162	-0.273571	574.58
-0.240048	-0.109187	571.34
0.455424	0.121055	561.62
0.131599	0.194366	641.62
0.143239	0.234324	644.86
0.119549	0.253836	641.62
-0.127851	0.292597	654.58
-0.0826592	0.393104	651.34
-0.0967087	0.167361	654.58
-0.21434	0.0492721	654.58
-0.22975	0.0975791	654.58
-0.168306	-0.183498	651.34
-0.139049	-0.215603	648.1
-0.142727	-0.256008	654.58
-0.150243	-0.14164	648.1
-0.106328	-0.15004	644.86
-0.0804753	-0.167218	651.34
-0.0659162	-0.0965282	644.86
-0.0302757	0.0729829	648.1
0.0907745	0.0918202	651.34
0.0846449	0.143788	648.1
0.0521482	0.175672	651.34
0.125534	0.156952	644.86
0.148609	0.156425	641.62
0.155366	0.155863	641.62
0.162276	0.143906	641.62
0.180551	0.123415	641.62
0.210514	0.125902	641.62
0.274626	0.125355	648.1
0.267551	0.0671462	641.62
0.252126	0.056398	644.86
0.176635	0.0934092	644.86
0.124095	0.0255367	654.58
0.100883	0.0651668	651.34
0.0765775	0.0746137	648.1
0.052003	0.0751163	651.34
0.0361362	0.041569	654.58
0.0609662	0.0377215	641.62
0.0652098	0.0967776	651.34
0.0540651	0.104648	641.62
0.122857	-0.178818	644.86
0.0563942	-0.152363	641.62
0.23489	-0.0686459	644.86
0.171094	0.0171234	648.1
0.192316	0.0427114	644.86
0.266222	-0.0699562	641.62
0.279939	-0.0735362	644.86
0.284239	-0.0553175	644.86
0.33268	-0.043929	641.62
0.31261	0.0334483	648.1
0.368982	-0.0553113	644.86
0.399252	-0.0802737	644.86
0.300729	-0.139349	641.62
0.254858	-0.300438	648.1
0.256889	-0.244892	641.62
-0.19657	-0.240515	726.038
-0.179736	-0.188446	729.888
-0.195365	-0.169108	729.085
-0.200454	-0.188661	730.247
-0.12343	-0.145097	734.87
-0.0976188	-0.13561	729.564
-0.140917	-0.0212107	726.895
-0.120497	0.103257	722.922
-0.137115	0.243936	723.893
-0.0504617	0.116067	728.587
-0.344204	0.0976538	727.955
0.0872141	0.0516823	723.186
0.105255	0.0736041	726.158
0.0635105	0.0957841	732.252
0.0882912	0.100377	731.644
0.0965585	0.110343	734.898
0.0442554	0.0991332	735.14
0.0258676	0.0849875	724.419
0.0186537	0.0726181	730.6
0.031153	0.0646982	722.238
0.0412369	0.0567101	725.589
0.0570467	0.011899	727.603
0.14444	0.0751974	724.369
0.160881	0.0688487	722.477
0.131792	0.103552	724.006
0.191723	0.116924	722.047
0.195307	0.131138	723.234
0.1633	0.153106	724.93
0.180639	0.161382	722.432
0.151449	0.163964	735.793
0.119389	0.163545	729.422
0.117617	0.13965	732.115
0.091275	0.156425	725.733
0.0322898	0.164979	728.737
0.0479353	0.153741	728.28
0.111508	0.290336	728.19
0.258487	0.208351	732.651
0.255142	0.104116	729.321
0.217747	0.067535	724.622
0.243844	0.0308007	730.329
0.171695	0.0224367	730.136
0.138375	0.195713	728.335
0.196431	0.175454	728.24
0.233176	-0.00501511	727.432
0.229441	-0.0436926	723.765
0.288232	-0.112107	729.296
0.31394	-0.0353183	723.321
0.399757	-0.0172611	728.052
0.394234	-0.0837068	728.23
0.177272	-0.344857	730.878
0.211424	-0.359926	730.618
0.236528	-0.30966	735.135
0.286465	-0.269367	731.805
0.261345	-0.332282	723.338
0.260626	-0.379286	730.364
0.322001	-0.338594	734.574
0.0876387	-0.32149	730.879
0.268921	-0.0645976	726.759
0.356059	-0.122384	728.917
0.308112	-0.175857	729.887
0.4533	-0.131031	732.134
-0.325906	0.133703	812.759
-0.234301	-0.0429094	808.246
-0.160095	0.00149091	808.1
-0.140468	0.0130621	804.86
-0.133536	0.0434489	808.1
-0.147546	-0.0103684	811.34
-0.0870039	-0.0236593	808.1
-0.0597513	0.0544158	814.58
-0.0788436	0.11135	808.1
-0.0342538	0.138799	801.62
-0.0846406	-0.0988921	801.62
-0.110476	-0.128847	808.1
-0.15153	-0.189574	811.34
0.0396627	0.0595411	801.62
0.0309217	0.0518164	801.62
0.0640311	0.0624049	801.62
-0.0113761	0.0608061	811.34
0.114018	0.199352	801.62
0.0886903	0.0996144	808.1
0.0885782	0.0847631	804.86
0.0683697	0.0797323	808.1
0.110775	0.102478	808.1
0.132902	0.0808675	801.62
0.143523	0.0270024	804.86
0.200642	0.0581086	801.62
0.211898	0.0226691	801.62
0.223525	0.0355279	801.62
0.310271	0.07828	803.946
0.222433	0.155813	808.1
0.267136	0.222161	807.496
0.231043	0.243926	811.028
0.351257	0.125767	810.944
0.32002	0.0195526	810.715
0.329406	0.0480556	803.26
0.242465	-0.0326002	802.652
0.228984	-0.0446259	801.62
0.211517	-0.0449942	804.86
0.214476	-0.0107669	808.1
0.334034	-0.040829	802.139
0.370275	-0.046347	802.834
0.373775	-0.0586381	801.917
0.427577	-0.0465682	803.247
0.388732	-0.114088	802.139
0.333408	-0.215369	802.313
0.285585	-0.252771	802.581
0.412814	-0.14591	803.768
0.127977	0.130501	804.86
0.159376	0.119853	808.1
-0.419305	0.141917	883.398
-0.383351	0.0797827	891.032
-0.251479	0.0743152	892.019
-0.0940517	0.0875106	884.86
-0.0173965	0.0551115	891.34
-0.16748	-0.103104	882.989
-0.152737	-0.0996958	883.569
-0.199661	-0.152363	888.132
-0.237161	-0.151449	883.339
-0.289738	-0.221836	886.365
-0.208526	-0.267504	883.182
-0.247914	-0.358825	882.484
-0.167214	-0.289896	884.14
-0.143032	-0.21872	890.965
-0.122167	-0.212302	891.874
-0.0797444	-0.196252	881.866
-0.136211	-0.026777	894.58
0.0320419	0.0643172	881.62
0.0334539	0.104191	884.86
0.0443065	0.134798	884.86
0.0560681	0.171938	888.1
0.0912862	0.136668	881.62
0.0731781	0.12633	881.62
0.0861123	0.105167	888.1
0.107674	0.171202	884.86
0.16903	0.152965	881.677
0.247022	0.0589938	882.81
0.322432	0.121255	887.716
0.321468	-0.00978368	886.491
0.336672	0.0310544	882.789
0.244843	-0.00895065	894.217
0.151605	-0.0125088	887.683
0.343666	-0.175022	888.839
0.350483	-0.367821	885.98
0.187646	-0.365587	889.415
0.155809	-0.331908	887.154
0.137671	-0.31327	885.822
0.272177	-0.375439	887.067
0.293424	-0.396656	885.221
0.34402	-0.286376	883.754
0.361478	-0.00401533	887.665
0.190137	0.0486735	884.608
0.133316	0.0568349	881.62
0.233968	0.227519	885.739
0.0841032	0.235535	881.62
-0.0180867	0.292566	888.1
0.0805611	-0.0417379	883.507
0.413231	0.139047	894.125
0.439437	0.145861	883.548

## Sheet: Sheet2
0.152355	-0.326686	-878.38
0.379193	-0.383303	-715.145
0.431206	-0.387416	-711.906
0.407409	-0.413673	-628.66
0.385561	-0.35424	-549.459
0.305996	-0.191608	-471.9
0.347819	-0.356018	-471.9
0.444543	-0.320289	-318.38
0.283903	-0.300596	-231.9
0.431917	-0.317432	-225.42
0.42376	-0.315119	-158.38
0.444189	-0.307637	-158.38
0.37887	-0.356099	-155.14
0.341922	-0.399351	-158.38
0.363593	-0.421454	-151.9
0.3328	-0.323164	-158.38
0.376002	-0.229626	-158.38
0.340398	-0.309453	-78.38
0.372121	-0.268115	-78.38
0.319507	-0.232737	-78.38
0.141976	-0.304183	-75.14
0.379375	-0.319899	-78.38
0.402733	-0.365943	-78.38
0.458138	-0.313467	-78.38
0.383849	-0.166048	-78.38
0.375271	-0.362777	1.62
0.430935	-0.40255	4.86
0.392357	-0.296449	1.62
0.385808	-0.143734	94.58
0.409017	-0.100479	84.86
0.384297	-0.291534	84.86
0.359181	-0.310352	81.62
0.375261	-0.300877	164.86
0.352191	-0.208241	241.62
0.375724	-0.398619	241.62
0.408517	-0.124732	324.86
0.330295	-0.308469	324.86
0.292217	-0.34526	324.86
0.34122	-0.341229	324.86
0.208564	-0.348899	484.86
0.367728	-0.372866	481.62
0.383784	-0.126183	481.62
0.378755	-0.164934	481.62
0.403633	-0.140733	484.86
0.422151	-0.0998393	564.86
0.340252	-0.370461	561.62
0.431473	-0.119928	564.86
0.395172	-0.135031	641.62
0.389947	-0.189264	644.86
0.338578	-0.376835	641.62
0.315136	-0.359157	641.62
0.368875	-0.373093	737.809
0.388865	-0.332041	726.744
0.344459	-0.387197	723.466
0.10072	-0.207198	724.709
0.419478	-0.15269	731.09
0.417357	-0.219017	732.279
0.420441	-0.112906	736.085
0.191375	-0.351069	803.748
0.324378	-0.343644	803.307
0.356606	-0.14604	801.929
0.383313	-0.145104	806.965
0.352005	-0.0533481	802.37
0.434243	-0.140757	882.979
0.443058	-0.165252	882.318
0.41319	-0.168811	882.995
0.375987	-0.34404	884.477
