# Supplementary material for: Spinal premotor interneurons controlling antagonistic muscles are spatially intermingled
Source: eLife. 2022 Dec 13;11:e81976. doi: 10.7554/eLife.81976 (PMC9844990; doi:10.7554/eLife.81976)
Supplement: Figure 12—figure supplement 4—source data 1. — The x-y coordinates are normalized (between –0.5 and 0.5) and scaled to an idealized spinal cord of dimensions 1700 μm and 900 μm in the mediolateral and dorsoventral directions respectively, while z coordinates are in micron, with the axis origin taken at the border between L4 and L5 and negative values in the rostral direction. [file elife-81976-fig12-figsupp4-data1.xlsx]

## Sheet: Sheet1
0.213644	0.147566	-5032
0.225059	0.153216	-5052
0.235229	0.170567	-4802
0.155129	0.0766093	-4772
0.165826	-0.119273	-4546
-0.100216	-0.188101	-4544
-0.127037	0.289357	-4279
-0.129097	-0.0183802	-4263
-0.283137	-0.257992	-4239
0.0778	-0.0636082	-4243
0.0307731	-0.0608803	-4243
0.0466294	-0.0759112	-4241
0.104352	0.0550529	-4265
0.17036	0.0958986	-4253
0.0771737	0.226869	-4271
0.252976	-0.0286643	-4048
-0.168967	-0.0674147	-4046
-0.07613	-0.155497	-4044
0.194438	-0.0190434	-3808
0.17662	0.0382711	-3836
-0.224929	0.200737	-3572
-0.170903	-0.174317	-3568
-0.11594	-0.105109	-3570
-0.105431	-0.0620285	-3574
-0.111806	-0.177278	-3582
0.26888	0.0301285	-3572
0.293992	0.008936	-3572
0.195431	0.138099	-3574
0.156965	0.0166528	-3574
0.144739	-0.0224189	-3576
0.262003	-0.0401905	-3578
0.292417	-0.0207407	-3600
0.235438	0.0825899	-3602
0.237787	-0.00553659	-3600
0.172795	0.287355	-3320
0.0796885	0.272658	-3320
0.266822	0.0814124	-3312
0.201354	0.0437908	-3312
0.294401	-0.0553698	-3312
0.2826	0.157002	-3300
-0.0906952	-0.0780013	-3290
0.106459	-0.103324	-3296
-0.10548	0.00688874	-3312
-0.183782	-0.22427	-3308
-0.171501	0.088068	-3306
-0.0837626	0.0456096	-3292
-0.137107	-0.00968688	-3284
-0.132941	-0.00283811	-3284
0.234873	0.220833	-3296
0.104133	0.157315	-3316
-0.0916314	-0.0982335	-3092
-0.0601754	-0.0840789	-3100
-0.138659	-0.0150036	-3108
-0.222775	0.0213604	-3092
0.0185046	0.0396387	-3096
0.157342	0.132051	-3120
0.148055	0.186258	-3102
0.230315	0.13758	-3090
0.243869	0.169207	-3110
0.264206	0.169092	-3124
0.303761	0.0995534	-3100
0.2707	-0.0108443	-3112
0.292772	-0.0606424	-3110
0.29723	-0.0506328	-3100
-0.207416	0.160181	-2862
-0.0733853	-0.0834001	-2862
-0.146487	-0.0417182	-2868
-0.0781196	-0.0638554	-2872
0.306639	-0.0941628	-2856
0.253481	0.0132677	-2848
0.219008	0.0237537	-2848
0.0994087	0.00731835	-2850
0.285295	0.0797882	-2856
0.166516	0.0188238	-2854
0.201632	0.0690765	-2854
0.170522	-0.0461093	-2866
0.234167	0.0254941	-2868
0.0848106	0.00711446	-2868
0.0902795	-0.00114326	-2868
0.190268	0.027118	-2874
0.183806	-0.00439829	-2878
0.297837	-0.031793	-2878
0.302868	-0.0509445	-2886
0.218792	0.00800285	-2884
0.264691	-0.0631854	-2884
0.119414	0.0142508	-2884
0.209446	0.098816	-2882
0.144419	0.0836986	-2882
0.276888	0.103222	-2860
0.122667	0.127609	-2844
0.118865	0.107132	-2846
0.282042	0.230197	-2866
0.179818	0.154952	-2852
-0.193544	0.176586	-2626
-0.258513	0.0243498	-2628
-0.145183	-0.101073	-2634
-0.153787	-0.110492	-2640
0.0381629	0.0196362	-2638
0.105801	0.0952304	-2618
0.0489157	0.0946107	-2620
0.227613	0.231452	-2624
0.172497	0.145044	-2626
0.115111	0.22561	-2630
0.295317	0.0813921	-2628
0.319479	0.0491052	-2640
0.179796	0.0807725	-2622
0.25058	-0.186795	-2620
0.185073	-0.0514805	-2634
0.225367	-0.0684685	-2638
0.335648	-0.0540696	-2646
0.26519	0.0210746	-2646
-0.0738111	-0.149477	-2366
-0.0104174	-0.0926093	-2368
0.235739	0.115944	-2370
-0.124071	-0.0837422	-2378
0.0267432	-0.00263057	-2386
0.234836	0.0694219	-2400
0.0648059	0.0281994	-2132
0.0911265	0.214796	-2130
0.15641	0.157143	-2128
0.171207	0.0909473	-2134
0.15237	0.156232	-2136
0.204103	0.203444	-2140
0.17093	0.210935	-2148
0.154439	0.119511	-2142
0.12066	0.10504	-2142
0.0611668	0.0362724	-2144
0.169134	0.0468332	-2150
0.251786	0.0880671	-2154
0.185697	0.118061	-2152
0.111534	0.141383	-2158
0.28944	0.0557191	-2160
0.18155	0.105811	-2164
0.145718	0.0593421	-2164
0.187997	-0.0358239	-2138
0.223936	-0.0196569	-2138
0.155722	-0.0382416	-2138
0.205366	-0.15762	-2138
0.243825	-0.0151789	-2138
0.165849	-0.00686064	-2138
0.244508	-0.0429158	-2138
0.296846	-0.0473027	-2138
0.196892	-0.0997071	-2138
0.221421	-0.0355786	-2138
-0.0950531	-0.0822787	-2180
-0.131429	-0.102805	-2190
0.145241	0.111746	-2154
0.139411	0.157927	-1890
0.274932	0.243559	-1894
0.215129	0.171882	-1896
0.0760014	0.0776821	-1896
0.246606	0.0822093	-1896
0.142196	0.121323	-1890
0.233251	0.0817965	-1898
0.275074	0.0842332	-1896
0.217336	0.214205	-1912
0.170871	0.192521	-1914
0.190366	0.203253	-1916
0.304376	0.259311	-1916
0.253155	0.113294	-1912
0.300976	0.128507	-1910
0.109995	0.236368	-1914
0.238831	0.176622	-1914
0.109837	0.0866766	-1912
0.154656	0.164765	-1904
0.0710651	0.211442	-1902
0.180117	0.0959308	-1902
0.30387	0.121583	-1914
0.196332	0.171303	-1912
0.186508	0.033921	-1892
0.194033	0.00917431	-1892
0.340587	-0.0494467	-1896
0.208401	-0.0577689	-1894
0.333117	0.00340874	-1898
0.273521	0.022756	-1898
0.169547	0.00719697	-1900
0.307525	-0.0355255	-1904
0.243451	-0.0241541	-1904
0.244878	-0.193979	-1904
0.273412	-0.102329	-1914
0.300584	-0.109333	-1914
0.319937	-0.0367372	-1914
0.273341	0.00426759	-1914
0.250229	0.0462777	-1910
0.351773	0.0808844	-1912
0.0754893	0.104439	-1892
0.0389406	0.078734	-1896
-0.0740836	0.171995	-1906
0.0526545	0.0263445	-1914
0.00600427	0.100485	-1914
-0.225629	0.0425227	-1890
-0.130018	-0.0914169	-1898
-0.166839	-0.172481	-1898
-0.17553	-0.101863	-1900
-0.076263	-0.098261	-1912
-0.238959	0.204874	-1682
-0.260213	0.221601	-1654
-0.301065	-0.0019564	-1654
-0.116189	-0.13033	-1652
-0.102257	-0.198513	-1656
-0.0802414	-0.110148	-1654
-0.115361	-0.115872	-1662
-0.0946444	-0.171858	-1670
-0.0673346	-0.141236	-1680
-0.141503	-0.0999709	-1682
0.291299	0.277275	-1656
0.290323	0.172961	-1670
0.329932	0.15593	-1660
0.337555	0.157553	-1670
0.259588	0.179379	-1664
0.250469	0.201544	-1662
0.221926	0.153716	-1658
0.234279	0.170034	-1678
0.265233	0.13239	-1674
0.201686	0.13298	-1676
0.0850972	0.191936	-1652
0.0943923	0.182348	-1652
0.206174	0.134541	-1650
0.217569	0.133729	-1654
0.0847026	0.144594	-1654
0.317096	0.16268	-1656
0.124662	0.132397	-1670
0.123401	0.171407	-1670
0.198491	0.12009	-1670
0.0438009	0.160113	-1674
0.162039	0.142859	-1672
0.121614	0.00334392	-1658
0.23304	-0.0576792	-1658
0.194073	0.0395374	-1658
0.170786	0.00653522	-1658
0.132318	0.0651718	-1658
0.232026	-0.0295958	-1652
0.226091	-0.0169902	-1652
0.257796	-0.0264531	-1652
0.267382	-0.0195502	-1652
0.278535	-0.0182667	-1652
0.308497	0.0510954	-1652
0.322955	-0.0581649	-1652
0.26189	-0.094282	-1652
0.229193	-0.121928	-1652
0.197301	0.104168	-1652
0.320527	-0.0205076	-1678
0.248057	0.125238	-1682
0.249488	0.11275	-1682
0.347864	-0.0336821	-1676
0.302468	-0.0432976	-1674
0.331554	0.0328773	-1650
0.221273	0.0164074	-1670
0.33128	0.0529131	-1652
0.340043	-0.121942	-1682
-0.240357	0.216072	-1676
-0.177788	-0.0508604	-1404
-0.103194	-0.0883	-1410
-0.0797323	-0.0758083	-1420
-0.165219	-0.188758	-1428
-0.127292	-0.162612	-1430
-0.050137	-0.104615	-1432
-0.092891	-0.0445401	-1438
-0.135919	-0.105927	-1438
-0.138175	-0.184772	-1434
0.18252	0.187978	-1408
0.115672	0.143906	-1408
0.0749578	0.172784	-1408
0.110877	0.0539674	-1410
0.208737	0.0649127	-1412
0.210961	0.165797	-1416
0.0689239	0.161094	-1416
0.21133	0.150418	-1418
0.12051	0.162392	-1418
0.272149	0.189978	-1424
0.260255	0.187318	-1426
0.217417	0.202881	-1426
0.0728973	0.055301	-1418
0.209955	0.130457	-1426
0.172033	0.0626357	-1424
0.0566242	0.0411991	-1428
0.186404	0.153922	-1426
0.114076	0.151723	-1424
0.0877161	0.181459	-1428
0.0820089	0.19083	-1428
0.0934549	0.205683	-1434
0.259517	0.1601	-1436
0.286288	0.101501	-1440
0.236204	0.252238	-1440
0.0836109	0.0960461	-1436
0.0635223	0.0830153	-1410
0.181087	0.132124	-1440
0.348314	0.000177338	-1410
0.297739	0.0130237	-1410
0.241352	0.00888107	-1416
0.308722	-0.0938755	-1416
0.255265	0.0677217	-1416
0.196037	-0.100912	-1416
0.162363	0.00200037	-1422
0.290514	-0.0768014	-1424
0.264782	-0.159881	-1430
0.332847	0.0189468	-1428
0.315662	0.0130379	-1430
0.283442	0.00967554	-1436
0.164149	-0.0150099	-1440
0.332209	-0.0135699	-1428
0.292016	-0.0526054	-1424
0.158606	0.0264091	-1426
-0.137044	-0.14161	-1166
-0.0959217	-0.123194	-1166
-0.0982657	-0.148114	-1180
-0.116071	-0.0930699	-1188
0.0286568	-0.00285283	-1172
0.218012	0.02528	-1172
0.230853	0.14089	-1164
0.0968367	0.122516	-1176
0.0937834	0.19438	-1176
0.131456	0.197318	-1176
0.193442	0.132621	-1178
0.262917	0.13981	-1178
0.311821	0.139181	-1178
0.261509	0.0902524	-1178
0.0818735	0.201541	-1184
0.104311	0.177426	-1188
0.171128	0.189882	-1188
0.238897	0.121782	-1196
0.124157	0.103521	-1186
0.226381	0.0459912	-1186
0.34456	0.140311	-1190
0.273666	0.0264098	-1182
0.289271	0.152923	-1178
0.310022	0.0332241	-1176
0.232112	0.177581	-1174
0.226859	0.161629	-1168
0.129529	0.00105922	-1174
0.302076	0.0285424	-1166
0.309642	0.0196873	-1180
0.327134	0.0310351	-1184
0.336618	-0.0217422	-1182
0.37462	-0.13635	-1182
0.189582	-0.116825	-1182
0.369361	-0.0864604	-1176
0.28848	-0.0884588	-1172
0.272052	-0.138524	-1172
0.22122	-0.268314	-1172
0.1525	-0.0281258	-1194
0.206077	-0.0245103	-1194
0.230375	-0.0519793	-1194
0.161588	-0.257397	-1190
0.206226	-0.226157	-1194
0.230657	-0.00885506	-1176
0.318802	-0.278934	-1186
0.270633	-0.319573	-1182
-0.0488088	-0.0820045	-928
-0.0969682	-0.148379	-950
0.00668298	-0.0384896	-958
-0.110794	-0.157524	-960
-0.0544328	0.0130124	-930
-0.147565	-0.00998737	-946
0.117217	-0.0555236	-930
0.126053	0.0441044	-952
0.121712	0.0541971	-952
-0.165991	0.245957	-930
0.176824	0.165441	-928
0.162729	0.0804394	-928
0.0349183	0.158415	-930
0.22836	0.156078	-930
0.284057	0.0775056	-932
0.0826482	0.206618	-936
0.158104	0.210198	-938
0.15285	0.180566	-940
0.238664	0.210444	-940
0.238644	0.308303	-936
0.293542	0.182327	-940
0.271645	0.183387	-942
0.302348	0.160654	-942
0.210614	0.12175	-940
0.237266	0.136258	-940
0.182339	0.159826	-942
0.300949	0.0828397	-942
0.168283	0.132531	-948
0.149583	0.0794427	-952
0.263144	0.209391	-954
0.260317	0.180608	-958
0.230073	0.176614	-960
0.221283	0.130636	-960
0.0923131	0.190988	-958
0.0748714	0.162198	-954
0.0997553	0.152828	-952
0.0335148	0.105973	-958
0.153769	0.145248	-954
0.211333	0.0646126	-928
0.110564	0.224895	-952
0.232386	0.331843	-934
0.274712	0.0302358	-932
0.306538	0.0328678	-934
0.26215	-0.0132861	-938
0.300954	-0.0201853	-940
0.316687	-0.0685921	-942
0.323995	-0.0526109	-946
0.362614	-0.0903987	-946
0.17165	-0.0456836	-948
0.194476	0.0302709	-944
0.231217	0.0543234	-940
0.300509	0.059861	-954
0.187843	-0.0054534	-956
0.324369	0.00460415	-960
0.345947	-0.122235	-952
0.256486	-0.109173	-936
0.169067	-0.0686552	-928
0.209765	-0.248238	-936
0.30921	-0.250625	-944
0.241192	-0.284307	-944
0.274037	-0.166795	-960
-0.261569	0.264694	-698
0.0914257	0.0753568	-694
-0.0339895	-0.0888684	-704
-0.0598256	-0.10006	-704
-0.0667987	-0.129332	-706
0.0779127	0.0612538	-704
0.0413482	0.0692542	-710
-0.13314	-0.0610848	-716
-0.0839339	-0.100794	-718
-0.0558226	-0.114579	-718
0.0690548	0.0825643	-718
0.091164	0.0606494	-718
0.136934	-0.105376	-718
-0.107638	-0.171712	-718
0.214185	-0.199041	-714
0.245776	-0.153853	-714
0.225266	-0.125283	-718
0.22836	-0.111154	-714
0.231587	-0.0430369	-716
0.190653	-0.154041	-710
0.168843	-0.115326	-706
0.144707	0.042062	-698
0.125787	0.0965243	-694
0.128814	0.0872111	-700
0.139062	0.0741805	-696
0.187135	0.0839811	-696
0.185717	0.0974472	-694
0.205917	0.121513	-694
0.0948575	0.0820314	-702
0.156478	0.0314815	-716
0.132407	0.0161177	-716
0.180595	0.0824213	-716
0.195032	0.0486391	-714
0.143293	-0.00429589	-708
0.196783	0.0206086	-716
0.215818	0.0489965	-702
0.175012	0.094893	-706
0.198111	0.0819989	-710
0.278342	0.0643409	-690
0.23668	0.105012	-692
0.290432	0.024976	-698
0.313969	0.0301817	-698
0.22658	0.0331583	-698
0.270417	0.0281475	-694
0.232858	0.0965698	-704
0.251473	0.0181844	-704
0.298566	-0.0170016	-708
0.240578	0.108034	-708
0.305568	0.00725947	-708
0.309866	0.0789833	-712
0.282554	0.0481972	-712
0.261021	-0.0109055	-716
0.269313	-0.00390595	-716
0.263339	-0.000311956	-714
0.258237	-0.163842	-700
0.343937	-0.148822	-700
0.113963	0.273793	-692
0.203171	0.163322	-712
0.208264	0.14027	-706
0.209606	0.165694	-704
0.208626	0.180518	-700
0.163784	0.179017	-706
0.102692	0.189533	-702
0.0872038	0.131034	-692
0.0866707	0.154334	-716
0.0798357	0.169431	-706
0.0837911	0.188785	-694
0.0810828	0.126225	-710
0.0844336	0.121585	-718
0.0567889	0.156816	-712
0.229302	-0.257701	-700
0.254224	-0.279187	-700
0.141838	0.0331414	-450
0.195008	0.0861231	-448
0.192757	0.110384	-450
0.215633	0.105143	-450
0.227706	0.0518717	-446
0.2393	0.0577451	-448
0.255844	0.155353	-450
0.24229	0.111716	-454
0.27803	0.103851	-456
0.217279	0.0839904	-454
0.254819	0.0414772	-454
0.196283	0.0287884	-452
0.155897	-0.00588686	-450
0.168671	0.0241799	-452
0.127434	0.0661616	-450
0.138577	0.0831225	-450
0.141893	0.0592387	-450
0.234718	0.0343995	-446
0.181024	0.0944926	-454
0.177183	0.198216	-454
0.274074	0.232588	-458
0.210662	0.123846	-458
0.128995	0.136246	-458
0.0945555	0.132559	-460
0.118667	0.0418539	-458
0.209772	0.0258686	-460
0.234988	0.0886932	-460
0.268883	0.0287884	-460
0.120307	0.162336	-462
0.283487	0.193977	-466
0.29766	0.18951	-468
0.244021	0.199508	-470
0.225921	0.166548	-470
0.220525	0.155184	-472
0.172572	0.130117	-472
0.237399	0.115362	-472
0.22207	0.10332	-466
0.200919	0.121182	-466
0.193277	0.144824	-466
0.189886	0.101698	-466
0.29641	0.0484539	-470
0.121178	0.0895207	-470
0.127374	0.132868	-472
0.131711	0.185783	-474
0.16768	0.0146263	-472
0.193482	0.0549059	-472
0.239445	0.0511518	-474
0.216759	0.0710259	-474
0.228952	0.10114	-472
0.18593	0.0458503	-468
0.165275	0.052383	-466
0.1478	0.0787023	-466
0.202075	0.0400374	-466
0.194743	0.0640424	-466
0.234853	0.132364	-462
0.264776	0.0938198	-474
0.101827	0.191824	-448
0.0572405	0.159389	-458
0.0615816	0.167308	-456
0.118677	0.317958	-462
0.0619917	0.143108	-462
0.0793514	0.0911018	-472
0.0713343	0.0718467	-474
0.113856	0.239276	-466
0.077866	0.0975739	-466
0.102158	0.0534124	-474
0.127304	-0.0457359	-470
-0.0384704	0.0017156	-466
0.156577	-0.0831831	-464
0.189471	-0.0365995	-466
-0.0788763	-2.69114e-05	-458
0.114596	-0.00842326	-456
0.184125	0.0033101	-454
0.0565553	0.0275842	-450
0.0986016	0.0426613	-450
0.0684135	0.036512	-472
0.105574	-0.010482	-470
0.218349	-0.063531	-448
0.194152	-0.100245	-454
0.164754	0.0367139	-468
0.304222	-0.0891641	-452
0.209392	-0.11991	-452
0.319801	-0.0663635	-454
0.278035	-0.0161536	-456
0.244971	-0.0244288	-456
0.233243	-0.0211053	-458
0.178793	-0.0196049	-462
0.317901	0.0269787	-458
0.27697	0.0214618	-468
0.25921	-0.0626968	-466
0.245976	-0.0498062	-470
0.234528	-0.137026	-474
0.368459	-0.107894	-454
0.282801	-0.241678	-452
0.278825	-0.199238	-454
0.206211	-0.203336	-456
0.247557	-0.191656	-460
0.287923	-0.216408	-456
0.216388	-0.220122	-462
0.249512	-0.279529	-464
0.296895	-0.245573	-472
0.336551	-0.244672	-470
0.327723	-0.261067	-470
0.210632	-0.215062	-474
-0.18474	0.231781	-458
-0.107359	0.174332	-458
-0.118267	-0.150818	-448
-0.0576606	-0.0950375	-452
-0.156992	-0.136003	-458
-0.0633471	-0.140161	-458
-0.0977764	-0.101678	-462
-0.07418	-0.11882	-466
-0.111485	-0.123873	-468
-0.101993	-0.15437	-468
-0.0769192	-0.101	-206
-0.0509132	-0.101741	-206
-0.0764556	-0.0836134	-208
-0.0779483	-0.0431901	-208
-0.114533	-0.102233	-216
-0.0854673	-0.0788504	-216
-0.0762424	-0.15649	-216
-0.0945485	-0.155279	-220
-0.124258	-0.116595	-222
-0.052035	-0.128403	-224
-0.0916002	-0.0385592	-228
-0.0367653	-0.0824098	-230
-0.0239802	-0.0881856	-230
-0.0611904	-0.10566	-232
-0.152587	-0.161833	-228
-0.0197571	-0.143148	-202
0.0410022	0.00546023	-226
0.0656175	-0.00319247	-200
0.0312118	0.185486	-200
0.0406082	0.11352	-202
0.0184128	0.0960384	-206
0.0325005	0.0817347	-210
0.00982292	0.0878481	-216
0.127146	0.188216	-198
0.0777536	0.164585	-200
0.114574	0.175344	-208
0.116985	0.1077	-208
0.143835	0.122562	-210
0.0672631	0.142546	-210
0.0813972	0.182367	-212
0.0972511	0.156446	-216
0.0599295	0.163521	-222
0.139074	0.167476	-222
0.0830336	0.123963	-228
0.133548	0.139133	-228
0.154158	0.112559	-228
0.144159	0.249754	-226
0.155275	0.18349	-204
0.104677	0.0395793	-204
0.0999258	0.0640036	-204
0.112298	0.0711811	-204
0.124801	0.0570902	-204
0.224115	0.0850079	-204
0.204325	0.221873	-204
0.166336	0.151639	-212
0.075255	0.175109	-216
0.0890784	0.0672474	-216
-0.064542	0.256645	-218
0.101887	0.391449	-214
0.11082	0.305494	-218
0.0318932	0.296709	-198
0.12137	0.314433	-196
0.180095	-0.0136359	-198
0.14421	0.0792541	-198
0.165223	0.0516814	-200
0.159582	0.00887287	-206
0.16953	0.0421773	-208
0.150348	-0.00530611	-210
0.105438	-0.0232574	-212
0.0984517	0.0396674	-216
0.0689505	0.0259581	-220
0.0835064	0.0528189	-224
0.144423	-0.0616698	-230
0.135087	-0.0275213	-230
0.182904	0.00874811	-230
0.149054	0.0269929	-228
0.160036	0.0705353	-228
0.129283	-0.0166229	-220
0.178259	-0.059424	-232
0.115038	-0.144204	-234
0.146959	-0.112353	-234
0.222868	-0.32197	-244
0.191419	-0.132293	-240
0.221908	-0.20674	-238
0.223248	-0.184914	-232
0.222487	-0.234394	-230
0.242574	-0.111142	-208
0.199462	-0.0898736	-208
0.196769	-0.0687666	-208
0.327304	-0.225572	-208
0.303973	-0.136909	-232
0.294516	-0.033943	-228
0.277911	-0.0337155	-220
0.25547	-0.0291579	-214
0.236339	-0.352067	-226
0.253454	-0.236896	-244
0.318366	-0.0152285	-202
0.233599	-0.11076	-214
0.278982	-0.0621101	-196
0.191767	-0.035308	-200
0.201354	-0.00292827	-208
0.194581	-0.118848	-244
0.257463	0.0511163	-224
0.229663	0.131919	-188
0.22888	0.145724	-188
0.198109	0.0509401	-190
0.273609	0.0447387	-194
0.259318	0.0627926	-194
0.265645	0.0819181	-190
0.199518	0.0676658	-190
0.178046	0.0808907	-190
0.190455	0.131589	-206
0.20566	0.109704	-222
0.224003	0.149606	-206
0.273966	0.124785	-202
0.206879	0.0908424	-198
0.203393	0.00751516	-196
0.172923	0.0690161	-210
0.189408	-0.0328128	-212
0.183659	0.169737	-190
0.177962	0.181142	-192
0.20496	0.138164	-216
0.179172	0.160189	-212
0.197997	0.188261	-210
0.196134	0.217844	-208
-0.168496	-0.101418	-224
0.150454	0.159088	-204
0.143478	0.155668	-220
0.239236	0.0839437	-236
0.0221227	-0.149499	34
-0.0666859	-0.125075	34
-0.0736464	-0.0880321	30
-0.0759599	-0.0974988	28
-0.118309	-0.0927253	30
-0.0945676	-0.0983691	30
-0.104229	-0.15849	30
-0.141866	-0.212572	26
-0.0867284	-0.188711	22
-0.071864	-0.188724	24
-0.0948605	-0.165392	28
-0.106195	-0.118293	24
-0.0663979	-0.0801588	16
-0.12655	-0.058842	18
-0.0432425	-0.151467	12
-0.0686618	-0.144129	16
-0.115628	-0.199543	10
-0.162266	-0.15697	10
-0.155733	-0.138767	34
-0.274513	0.0085026	32
-0.246383	0.224549	10
0.170607	0.065055	30
0.142715	0.0746355	30
0.142661	0.0264451	28
0.25033	0.0943588	30
0.17025	0.0334547	30
0.158359	0.0805404	28
0.290405	0.0762356	30
0.236891	0.0773469	28
0.236925	0.0923972	26
0.212871	0.0862244	28
0.171128	0.100625	28
0.110648	0.0967556	30
0.186678	0.146867	26
0.136718	0.177229	24
0.11609	0.107816	26
0.124098	0.095671	24
0.13013	0.0869207	20
0.289437	0.105365	24
0.251412	0.106477	28
0.271798	0.143774	26
0.162371	0.0412008	18
0.134965	0.126421	14
0.136236	0.159494	16
0.134807	0.146124	18
0.152779	0.170775	20
0.165151	0.157566	22
0.297594	0.244467	20
0.117132	0.238809	22
0.226986	0.22072	18
0.244482	0.130746	12
0.278435	0.122732	8
0.261044	0.112516	8
0.270566	0.197856	8
0.231986	0.169235	8
0.152337	0.156676	6
0.146836	0.199048	8
0.105589	0.164643	8
0.12876	0.0732898	8
0.173457	0.0661864	8
0.20819	0.0754656	8
0.224603	0.074997	12
0.211546	0.111317	12
0.237819	0.0559967	10
0.241865	0.0734705	6
0.147422	0.0216448	8
0.0914746	0.168807	12
0.219658	0.142368	14
0.372129	0.102982	12
0.237129	0.211086	24
0.162395	0.0581926	18
0.247019	0.108639	16
0.215682	0.384217	18
0.0829353	0.15533	28
0.0556295	0.199858	24
0.1005	0.101168	20
0.0897965	0.137669	16
0.0726534	0.173667	12
0.084524	0.163083	8
0.040929	-0.0184513	16
0.0520251	0.0103772	12
0.187338	-0.00875701	14
0.18985	-0.0203259	10
0.187373	0.00381613	8
0.22367	-0.00220264	10
0.213298	-0.0181835	8
0.0781096	0.0675388	10
0.0673611	0.0741467	12
0.0597899	0.0232918	14
0.0822006	0.0464095	14
0.095357	0.11441	12
0.0833524	0.119847	10
0.0500392	0.106336	10
0.105197	0.0656843	12
0.0751159	-0.0402367	24
0.213075	-0.00672844	26
0.107789	0.0456663	26
0.103757	0.0746221	26
0.138063	-0.00210891	22
0.120156	0.0929864	18
0.24326	0.0269338	18
0.305418	0.0370968	30
0.187005	-0.143647	26
0.258318	-0.129856	24
0.241463	-0.0387571	30
0.19486	-0.0856888	30
0.238618	-0.0214975	26
0.278639	-0.00383621	24
0.315626	0.0445014	26
0.154531	-0.0382015	22
0.289095	-0.178361	22
0.198295	-0.137039	24
0.275496	-0.09701	22
0.23	-0.0748564	20
0.21309	0.00395672	18
0.267677	0.0423992	16
0.332953	0.00661462	18
0.280406	0.00790006	20
0.274925	0.0372976	20
0.238038	-0.111826	16
0.262484	-0.141692	16
0.236603	-0.182572	14
0.312324	-0.0239144	16
0.325967	0.0314329	14
0.293389	0.0234525	12
0.258626	-0.108278	8
0.155792	-0.0554745	8
0.35436	-0.00821472	6
0.346621	-0.0823681	6
0.226326	-0.024517	24
0.249844	-0.101335	28
0.263412	-0.17105	30
0.217384	-0.132862	26
0.22501	-0.141799	28
0.151438	-0.0709867	14
0.259763	-0.30912	28
0.199099	-0.25943	28
0.255057	-0.2413	22
0.300553	-0.201559	20
0.320774	-0.307406	18
0.3847	-0.151862	12
0.249546	-0.304507	24
0.237526	-0.283291	6
0.258457	-0.320508	16
0.225129	-0.255794	10
-0.243479	0.222563	266
-0.0411564	0.0319389	248
-0.143272	-0.106663	270
-0.0770657	-0.179993	266
-0.00423922	-0.10054	258
-0.133037	-0.190019	258
-0.0843134	-0.153553	254
-0.142265	-0.184584	252
-0.0709829	-0.133084	248
-0.149355	-0.117629	236
-0.036279	-0.0779524	238
-0.0509162	0.0211749	268
-0.104603	-0.18307	252
0.343534	-0.242622	244
0.340297	-0.201452	246
0.189286	-0.240207	246
0.221184	-0.213653	254
0.199871	-0.195001	254
0.283192	-0.192251	254
0.302408	-0.176972	250
0.258785	-0.27743	266
0.281592	-0.0815845	272
0.158436	-0.013734	272
0.334215	0.0937736	272
0.193545	-0.0247251	270
0.217264	0.0105559	268
0.203123	0.0379168	266
0.17473	0.021692	262
0.161268	0.0378159	266
0.190709	0.0985471	266
0.210553	0.101959	270
0.184733	0.111348	266
0.25296	0.109954	266
0.242861	0.0777191	270
0.289412	0.0740176	268
0.308298	0.098894	262
0.352027	0.0872597	260
0.120081	0.0881867	268
0.38973	-0.0704485	244
0.276927	-0.0703287	238
0.368741	-0.0712178	238
0.246452	-0.0677622	246
0.232975	-0.118303	246
0.365241	-0.0987678	258
0.260872	-0.0436551	260
0.305234	-0.0353188	264
0.294476	-0.0307849	264
0.3655	-0.0728384	260
0.316817	-0.00439515	256
0.212331	-0.0309363	256
0.206111	-0.0577486	256
0.203923	-0.0198633	250
0.295829	0.000939565	248
0.255407	-0.0256772	236
0.229222	-0.0122963	238
0.111805	-0.0582215	238
0.141277	-0.0753292	260
0.211779	-0.0220892	262
0.204364	-0.0251476	236
0.102222	0.219972	238
0.10279	0.168214	240
0.0895149	0.158427	242
0.106254	0.0747553	244
0.0766858	0.0875561	244
0.090462	0.100653	244
0.14231	-0.00952807	236
0.152855	0.0119558	238
0.163618	0.0159474	238
0.153448	0.0403067	240
0.195652	0.0379042	238
0.208102	0.00070625	238
0.197177	0.174419	246
0.17984	0.133891	246
0.190542	0.143596	252
0.125014	0.128405	254
0.125475	0.155306	252
0.103727	0.139049	252
0.0471987	0.099657	254
0.149026	0.220148	250
0.0743256	0.217683	254
0.0607216	0.184949	252
0.0725985	0.0700449	252
0.156152	0.137687	270
0.106249	0.178467	270
0.111977	0.150122	270
0.0941289	0.166013	270
0.0943821	0.148174	270
0.119103	0.0987805	260
0.112914	0.0898451	260
0.108715	0.0655236	262
0.051215	0.0763885	256
0.097421	0.0896875	256
0.057389	0.0284518	248
0.111086	0.0544885	268
0.188476	0.0767227	250
0.169883	0.0967752	248
0.189392	0.0218118	246
0.151908	0.284833	254
0.173296	0.205903	256
0.267157	0.184476	242
0.262953	0.212008	256
0.23342	0.190839	266
0.309438	0.370554	280
0.217497	0.158244	246
0.217421	0.148571	238
0.254211	0.119848	244
0.250575	0.137107	254
0.266022	0.124735	256
0.271168	0.0912892	252
0.2991	0.0932313	252
0.263667	0.140783	262
0.282468	0.152594	266
0.301998	0.041158	240
0.261596	0.0299211	246
0.275777	0.0134061	250
0.207053	0.0788415	252
0.227039	0.0747679	250
0.285355	-0.00819124	260
0.320469	0.0300283	240
0.281338	0.0150772	258
0.335217	0.13019	258
0.317972	-0.206982	238
0.336023	-0.227362	238
-0.256593	0.25122	514
-0.117121	-0.173397	520
-0.190335	-0.174343	536
-0.219978	-0.0290046	540
-0.0828315	-0.129452	548
-0.131974	-0.150076	550
-0.151872	-0.146386	528
-0.0962615	-0.120405	538
-0.25962	-0.000952336	536
0.223477	0.220579	556
0.202469	0.202246	556
0.200292	0.150362	556
0.197738	0.0653957	556
0.205119	0.175742	554
0.1503	0.127149	554
0.0469173	0.088972	550
0.0284053	0.0825199	556
0.151968	0.158332	548
0.12078	0.182902	536
0.0787319	0.1355	536
0.194971	0.129875	530
0.237768	0.151356	524
0.237375	0.136851	524
0.262684	0.0937872	524
0.298715	0.0834484	524
0.227041	0.0707288	526
0.106112	0.171147	526
0.103834	0.230733	532
0.223376	0.287873	540
0.174728	0.114941	532
0.299772	0.164927	528
0.193298	0.146594	544
0.119946	0.117554	544
0.234459	0.188098	544
0.29931	0.0959121	544
0.223711	0.0893053	544
0.148909	0.0968347	536
0.16254	0.0931801	538
0.19179	0.113786	538
0.140709	0.0904362	538
0.39008	0.179164	546
0.341113	0.138327	536
0.305767	0.104983	536
0.272312	0.0821985	536
0.239254	0.066479	536
0.198253	0.170754	530
0.0896447	0.0264154	530
0.353481	0.0773237	522
0.306601	0.056158	526
0.195683	0.0343734	524
0.159519	0.0570806	524
0.131475	0.0391053	554
0.256673	0.0507119	554
0.290914	0.0583127	554
0.333668	0.032308	554
0.337863	0.0456347	552
0.31181	0.0188205	554
0.279523	-0.0930015	554
0.265541	-0.0563604	554
0.321528	-0.0489143	554
0.239031	-0.023356	554
0.158159	0.0375042	550
0.330997	-0.00725561	548
0.248882	-0.00394624	550
0.201774	-0.041248	544
0.213807	-0.0252845	522
0.327858	0.0204276	524
0.243731	-0.0813949	528
0.263114	-0.190449	528
0.23473	-0.0024225	532
0.209745	-0.0509857	532
0.281631	-0.055164	532
0.292342	-0.00385696	534
0.244671	-0.0428789	540
0.217546	-4.16647e-05	542
0.344395	0.0208502	540
0.341607	-0.168611	548
0.271605	-0.146439	536
0.322107	-0.056914	556
0.244007	-0.214585	524
0.0565829	0.0832702	520
-0.201415	-0.139613	520
-0.135744	0.100527	520
-0.106201	-0.152616	520
-0.140621	-0.104532	520
-0.139887	-0.138091	520
-0.0917709	-0.0995923	520
-0.0926301	-0.0858903	520
-0.195935	-0.197714	520
-0.110742	-0.142711	520
0.175496	0.0385053	522
0.244876	-0.186887	518
0.344078	-0.0409621	516
0.266533	-0.232214	514
0.304691	-0.0247118	506
0.227897	0.00101278	506
0.187741	0.017557	504
0.243994	-0.0993832	494
0.136496	-0.0038943	508
0.232938	0.0962534	504
0.323013	-0.153244	500
0.332755	-0.104996	500
0.209711	0.0477771	492
0.318347	-0.0118593	490
0.231618	-0.0356695	514
0.2393	-0.0469277	500
0.189664	0.151015	494
0.119306	0.246393	512
0.135136	0.0768602	508
-0.192	0.0125158	750
-0.187934	-0.115789	748
-0.147177	-0.0629187	748
-0.151249	-0.0772169	744
-0.131416	-0.112616	740
-0.219094	-0.119021	738
-0.153618	-0.139254	736
-0.122407	-0.10187	730
-0.140781	-0.170802	734
-0.0976203	-0.113837	742
-0.0828715	-0.0613779	742
-0.134249	-0.152691	742
-0.0695422	-0.121195	726
-0.215746	-0.13189	722
-0.290548	0.221191	750
0.0483181	0.0622266	752
0.271128	0.100864	748
0.2743	0.194084	750
0.105894	0.0430252	750
0.132858	0.0902746	746
0.158674	0.113961	744
0.186385	0.160173	748
0.154619	0.0676194	746
0.187193	0.0751538	742
0.235551	0.059047	738
0.211827	0.100701	734
0.167298	0.132405	734
0.19178	0.146749	736
0.307955	0.0807229	730
0.220112	0.0849536	728
0.213773	0.154845	728
0.123227	0.0489338	730
0.164109	0.0658371	736
0.146114	0.188064	736
-0.0137309	0.176619	730
0.249508	0.213135	730
0.160484	0.055874	726
0.118658	0.244212	724
0.324242	0.0798415	722
0.298912	0.110834	720
0.222657	0.160029	720
0.182856	0.152403	722
0.335812	0.0439262	720
0.295943	0.0273233	722
0.25488	-0.0280023	722
0.248281	-0.0102503	724
0.29976	-0.0250251	732
0.301559	-0.0395127	740
0.284248	-0.045911	742
0.30209	0.0452516	744
0.290785	0.026801	748
0.359242	0.0070577	748
0.30748	0.0855412	742
0.21064	0.0355888	740
0.287132	-0.158756	722
0.271959	-0.102144	718
0.219756	-0.109241	722
0.369664	-0.146155	730
0.321505	-0.179433	730
0.312247	-0.0984683	726
0.274617	-0.125831	730
0.217177	-0.0859394	742
0.292465	-0.062997	744
0.206772	-0.015036	734
0.202937	-0.164521	740
0.177274	-0.0293081	748
0.183319	-0.142865	750
-0.167102	-0.139281	966
-0.129876	-0.124499	976
-0.246151	-0.125081	988
0.266351	-0.174808	964
0.374804	-0.0209626	986
0.342297	0.00530683	966
0.247864	0.109518	974
0.191103	0.140234	978
0.327203	0.0172704	994
0.28882	-0.00442677	982
0.28478	-0.0264283	980
0.226144	0.279092	994
0.114949	0.27455	1210
0.125787	0.0585311	1212
0.20032	0.0787162	1218
0.11541	0.21133	1222
0.150304	0.129606	1222
-0.0432682	0.125778	1230
0.0186484	0.163979	1232
0.142585	0.125929	1232
0.212603	0.145963	1230
0.178377	0.100189	1234
0.186454	0.230799	1228
0.143908	0.16462	1228
0.226166	0.136084	1210
0.335101	-0.0284326	1202
0.364788	-0.0587033	1206
0.290182	-0.0592815	1206
0.239049	-0.0142232	1206
0.211929	-0.116436	1210
0.168886	-0.0250386	1210
0.281438	0.0603004	1216
0.287142	0.0415749	1218
0.326733	-0.0392066	1222
0.162447	-0.111403	1226
0.355868	-0.100134	1228
0.279217	0.0387178	1224
0.164353	-0.0253208	1232
0.28835	0.07873	1210
0.3577	-0.122171	1216
-0.205357	-0.111211	1230
-0.252236	-0.020426	1230
-0.25436	-0.00892218	1228
-0.173686	-0.0906469	1230
-0.257261	-0.162548	1226
-0.220656	-0.130074	1224
-0.0837268	-0.0836936	1226
-0.149819	-0.0361362	1212
-0.0759531	-0.142583	1210
-0.208807	-0.0100786	1460
-0.170262	-0.151788	1464
0.356823	-0.0225937	1468
0.199344	0.185235	1710
0.160169	0.18095	1702
-0.185041	0.247317	1698
0.296692	-0.190157	1702
0.225112	-0.00335543	1698
-0.200253	-0.128719	1692

## Sheet: Sheet2
0.334035	-0.0741601	16
0.29443	-0.214188	-1426
0.328234	-0.13817	-448
0.35311	-0.123644	-452
0.353245	-0.139946	-458
0.332935	-0.118242	-470
0.302944	-0.191409	-204
0.354154	-0.172379	-202
0.335866	-0.145401	-196
0.32023	-0.261864	-248
0.3798	-0.144029	30
0.377754	-0.0896723	26
0.378216	-0.075084	16
0.347102	-0.255942	24
0.344947	-0.313385	12
0.345206	-0.283545	14
0.332074	-0.176225	10
0.133545	-0.289617	8
0.37215	-0.285224	240
0.334944	-0.287898	244
0.310653	-0.281327	242
0.306206	-0.205241	272
0.346755	-0.226782	272
0.318635	-0.248556	272
0.307756	-0.237199	268
0.334681	-0.198696	236
0.369567	-0.0529877	272
0.410674	-0.029945	552
0.411032	-0.0353603	718
0.394559	-0.0680961	734
