# Supplementary material for: Spinal premotor interneurons controlling antagonistic muscles are spatially intermingled
Source: eLife. 2022 Dec 13;11:e81976. doi: 10.7554/eLife.81976 (PMC9844990; doi:10.7554/eLife.81976)
Supplement: Figure 12—figure supplement 4—source data 2. [file elife-81976-fig12-figsupp4-data2.xlsx]

## Sheet: Sheet1
0.209167	-0.0519581	-3538
0.0161705	-0.0876702	-3542
0.411332	0.101572	-3506
0.322827	-0.140604	-3524
0.0828626	0.149352	-3530
0.271347	-0.00935438	-3520
0.238335	-0.0422362	-3540
0.18642	0.0993773	-3524
0.187829	0.0878966	-3030
0.334152	-0.0399216	-3054
-0.194627	-0.186784	-3050
-0.06245	-0.15869	-3036
0.19296	0.188755	-3034
0.116022	0.14352	-3036
0.0831569	0.205433	-3038
0.196426	0.192251	-3046
0.045143	0.0278353	-3038
0.149818	-0.0250348	-3058
0.170635	-0.127246	-3044
0.082709	0.0550698	-3040
0.0946825	0.18892	-3044
0.202635	-0.0456761	-3062
0.109847	0.215992	-3062
-0.155995	-0.151684	-3050
0.156834	-0.0349582	-3048
0.161683	-0.0780929	-3028
0.251555	0.120261	-2540
0.281524	-0.109439	-2540
0.207377	0.18015	-2540
0.0931631	0.185398	-2540
0.172545	0.115564	-2540
0.329495	-0.0380281	-2540
0.206232	0.0349062	-2540
0.250862	0.00443761	-2540
0.300523	-0.250468	-2540
0.249809	-0.00860396	-2540
0.0373167	0.180486	-2540
-0.0776896	-0.135912	-2544
-0.14368	-0.151325	-2542
0.273722	0.0542341	-2542
0.215482	-0.0106219	-2524
0.215982	0.0597984	-2524
0.257416	0.0735287	-2518
0.125695	0.04393	-2508
0.115195	0.0444023	-2510
0.164267	0.065251	-2510
0.279907	0.114625	-2522
0.208133	0.0968731	-2522
0.128259	0.0381614	-2522
0.0784996	0.1198	-2528
0.274802	0.141334	-2536
0.34542	-0.015272	-2536
0.267233	0.0273608	-2536
0.162909	-0.010127	-2538
-0.10105	-0.165038	-2544
-0.207449	-0.189375	-2544
0.134411	0.0443667	-2548
0.283416	0.051261	-2508
-0.147982	-0.0770672	-2514
0.0964907	0.223641	-2522
0.184163	0.0562744	-2522
0.224194	0.00954374	-2060
-0.186123	-0.144801	-1550
0.26051	0.0139076	-1558
0.288612	0.0592399	-1570
-0.161776	-0.175682	-1534
0.227905	-0.131577	-1536
-0.252159	0.125506	-1536
-0.165566	-0.163884	-1536
0.145422	0.0863467	-1540
0.151995	0.093813	-1538
0.233538	0.0740773	-1540
0.191281	0.147514	-1544
0.125959	0.108121	-1548
0.262707	-0.0305915	-1550
0.226624	0.219852	-1550
0.317703	0.0852264	-1550
0.285258	-0.0247226	-1564
0.37542	0.0652224	-1566
0.321784	0.0102518	-1572
0.305724	-0.16306	-1574
0.406208	-0.160716	-1578
0.27223	-0.179344	-1578
0.225485	-0.0934878	-1578
0.259313	-0.0501445	-1578
0.156921	-0.0642848	-1576
0.158193	-0.0479696	-1576
0.143302	-0.0397083	-1574
-0.14362	-0.0950939	-1570
-0.189314	-0.210591	-1570
-0.0831374	-0.130491	-1572
-0.20076	-0.104454	-1568
-0.290153	-0.0840199	-1564
0.0993355	0.126964	-1552
0.110888	0.165548	-1548
0.0932918	0.0742206	-1536
0.0894104	0.0510314	-1576
0.0672279	0.020766	-1538
0.0916153	0.0275108	-1546
0.0574243	0.0120192	-1548
0.093146	0.120647	-1554
0.0883232	0.201537	-1578
0.107359	0.0250255	-1578
0.128291	0.11567	-1538
0.0198805	-0.014249	-1550
0.138623	0.00130478	-1548
0.128783	-0.030362	-1552
-0.0975133	-0.163339	-1556
-0.152052	-0.14987	-1556
-0.172237	-0.225831	-1550
-0.0664687	-0.083575	-1548
0.265383	0.0661572	-1548
0.309839	0.0667509	-1566
0.260068	-0.0065308	-1570
0.262175	0.0149394	-1570
0.179811	0.0311905	-1574
0.187148	0.0762502	-1534
0.287225	0.0335584	-1548
0.307324	0.139653	-1554
0.241815	-0.126191	-1114
0.185101	-0.0381493	-1122
0.296008	-0.0324538	-1122
0.291787	0.0139038	-1126
0.263609	0.105846	-1132
0.169515	0.123008	-1132
0.192737	0.153432	-1132
0.145553	0.168241	-1126
0.244002	0.159052	-1120
-0.211197	-0.20259	-1120
-0.153849	-0.181736	-1110
-0.181696	-0.164693	-1120
-0.106227	-0.109236	-1126
0.127499	0.268185	-1138
0.200061	0.278219	-1126
0.259057	0.242794	-1112
0.198515	0.167199	-1126
0.115621	0.257394	-1128
0.11334	0.173308	-1136
0.267529	0.134119	-1132
0.272821	0.204247	-1126
0.145645	0.169874	-1120
0.130071	0.145036	-1126
0.13062	0.144331	-1142
0.13062	0.144331	-1122
0.130406	0.143885	-1120
0.126918	0.144019	-1116
0.118758	0.146873	-1132
0.087555	0.18608	-618
0.0778595	0.213291	-606
0.117519	0.231494	-620
0.134431	0.315998	-614
0.138067	0.323981	-614
0.114974	0.212006	-608
0.11283	0.220889	-604
0.256369	0.19136	-604
0.215811	0.195614	-600
0.163325	0.186231	-596
0.147038	0.15762	-574
0.0887834	0.142271	-574
0.0671496	0.0984713	-580
0.188172	0.132059	-578
0.113905	0.168965	-578
0.153224	0.202053	-580
0.184169	0.115524	-582
0.100661	0.038609	-584
0.128793	0.0863062	-584
-0.0632451	0.0331508	-584
0.170185	0.0688256	-592
0.162047	-0.0971068	-592
0.304594	-0.0510417	-596
0.185387	0.0316346	-598
0.321589	-0.0268364	-598
0.271604	0.0797242	-598
0.229926	0.0624398	-598
0.254132	0.0198798	-598
0.211046	-0.0307249	-598
0.186769	0.0373337	-600
0.189768	-0.0105954	-602
0.285275	-0.0440494	-604
0.26686	0.0793675	-612
0.278327	0.0751133	-612
0.30262	0.0778781	-616
0.28499	-0.0130035	-618
0.189549	-0.199743	-618
0.235909	-0.261041	-618
0.265522	-0.268836	-616
0.0629259	0.15845	-616
-0.180683	-0.222066	-616
-0.139487	-0.175486	-616
0.12782	0.0436419	-614
-0.0318677	-0.10552	-610
0.0445344	0.0201153	-610
0.0611958	0.0128687	-610
0.0906931	0.175218	-602
0.122058	0.0788083	-602
0.159026	0.122493	-592
0.226899	0.03725	-586
0.315286	0.0225308	-586
0.301693	0.0574994	-588
0.328704	-0.0380198	-590
0.239481	0.0958159	-584
0.276317	0.170337	-582
0.248233	0.163966	-582
0.256497	0.115974	-582
0.198937	0.193624	-578
0.217667	0.0101989	-586
0.202291	0.160816	-604
0.207434	0.125975	-604
0.212614	0.108105	-596
0.269005	-0.00873686	-602
0.21819	0.202728	-608
0.0995926	0.228733	-608
0.0878466	0.261174	-582
0.209159	0.252973	-606
0.22135	-0.31701	-580
0.041173	0.0503226	-588
-0.261377	0.232413	-580
-0.103598	-0.0956947	-588
-0.103995	-0.130259	-598
-0.0489906	-0.105321	-588
-0.188662	-0.0808581	-592
-0.162466	-0.121101	-590
-0.114807	-0.147846	-598
-0.0462073	-0.0981179	-120
0.226459	-0.248528	-120
0.229509	-0.266464	-120
0.19959	-0.0441456	-120
0.135341	-0.0119079	-120
0.169535	0.00190289	-120
0.176509	-0.0770449	-120
0.206217	0.000408825	-120
0.188678	0.0357833	-120
0.180438	0.118284	-120
0.168209	0.0853552	-120
0.135024	-0.0665418	-136
0.150022	0.0669134	-120
0.20592	-0.0558157	-124
0.186889	0.0115512	-102
0.0604307	-0.0112761	-100
0.0716597	0.0269899	-98
0.110979	0.118121	-104
0.188446	0.0956278	-94
0.203946	-0.237445	-94
0.0769049	0.0800702	-98
0.13094	0.0633232	-106
0.0942232	0.110234	-106
0.133924	-0.169692	-104
0.118475	0.0435733	-104
0.196224	0.0205527	-96
0.111084	-0.0180701	-96
0.215733	0.0621042	-94
0.262653	0.0910192	-94
0.078377	0.0291455	-94
0.242185	-0.0196013	-94
0.255881	0.0282758	-94
0.0791457	0.153621	-94
0.366699	-0.155933	-94
0.241798	-0.113066	-94
0.265462	-0.154499	-94
0.267567	-0.0852585	-110
0.312855	0.0100125	-112
0.304319	-0.00726221	-124
0.217883	0.0445099	-130
0.277726	0.102726	-128
0.257795	0.109647	-116
0.249189	0.104094	-116
0.210879	0.156416	-136
0.228022	0.135425	-136
0.192149	0.150418	-136
0.246481	0.0470371	-136
0.226962	-0.0687123	-136
0.262558	-0.182091	-134
0.228469	-0.0960738	-134
0.340659	0.0820177	-136
0.347275	0.0865965	-126
0.24522	0.0936357	-126
0.220204	-0.0121384	-122
0.268029	0.232131	-102
0.221812	0.137395	-102
0.305052	0.243704	-120
0.175665	0.238545	-126
0.173389	0.188922	-116
0.115541	0.241712	-108
0.123941	0.177616	-98
0.0520956	-0.02531	-92
-0.120706	-0.150998	-110
0.244898	0.132415	-110
0.229891	0.0916065	-106
0.258589	0.0449856	-118
0.274757	-0.300568	-132
-0.328213	0.17268	-134
-0.0786028	0.0543028	-94
-0.141353	-0.123452	-96
-0.139226	-0.205851	-96
-0.0982204	-0.203275	-116
-0.0894091	0.0101753	-132
-0.189874	-0.209097	-130
0.0622098	0.00846657	-110
0.0407963	-0.0222398	-96
-0.046179	-0.14698	-92
-0.128614	-0.189201	-96
0.186405	-0.298185	-90
0.274972	-0.296965	-90
0.254671	-0.33151	-104
0.310911	-0.394906	-98
0.321493	-0.341153	-104
0.180971	-0.293428	-108
0.32582	-0.249257	-104
0.255645	-0.15664	-106
0.186915	-0.231354	-106
0.333514	-0.0887788	-120
0.306115	-0.0563723	-118
0.241252	-0.0682735	-116
0.219977	-0.0565354	-80
0.194017	-0.0336774	-98
0.233023	-0.0506964	-102
0.198344	-0.0467551	-106
0.119486	-0.137354	-112
0.0887101	-0.0174226	-82
0.196604	0.0019492	330
0.183349	0.0128115	330
0.200099	0.109318	328
0.122624	0.0132151	328
0.0903836	0.0213382	328
0.0840621	-0.000927373	328
0.118945	0.0352573	328
0.223604	-0.0298992	328
0.282309	-0.0180065	328
0.240533	-0.0893198	326
0.184497	-0.0512288	322
0.229161	-0.00714421	322
0.148491	-0.0409761	322
0.172369	-0.0196552	322
0.240941	0.0249446	322
0.18217	0.117347	322
0.178201	0.0688832	324
0.115843	0.105712	316
0.0953785	0.134057	316
0.0749906	0.115157	316
0.111389	0.00358069	316
0.239002	0.160152	312
0.266044	0.131696	312
0.276513	0.0830943	312
0.171262	0.0948926	312
0.0970979	0.196534	308
0.145956	0.204675	302
0.102904	0.156125	298
0.126619	0.147281	298
0.127404	0.121967	298
0.133619	0.0669769	300
0.159879	0.0448488	300
0.159782	-0.00203507	302
0.168951	0.0749884	300
0.240441	0.0939738	300
0.310172	0.0306119	320
0.289034	0.0223428	318
0.265089	0.0477254	302
0.0883529	0.0547837	312
0.187548	0.113586	294
0.235477	0.0457676	302
0.29359	0.0473475	298
0.25187	0.0323378	332
0.0692915	0.316415	332
0.108751	0.101024	332
0.111113	0.114513	330
0.0594853	0.221316	324
0.177992	0.0857906	324
0.111603	0.0519157	322
0.0861692	0.0817548	322
0.123231	-0.0116866	320
0.0693885	0.0460166	320
0.184619	0.105274	320
0.18067	0.0605454	320
0.18716	0.0653454	318
-0.0298728	0.116119	318
0.0627762	0.134323	318
0.0244951	0.121391	316
0.215482	-0.00216387	316
0.207548	0.0318398	316
0.198415	0.0527486	316
0.215262	0.024335	314
0.240023	0.0314105	310
0.209089	-0.00917927	310
0.215992	0.0460252	302
0.225599	-0.0670886	300
0.193084	-0.0275979	300
0.32517	0.0917651	298
0.0579544	0.00180628	296
0.290275	0.205272	294
0.300704	0.129386	294
0.144548	0.0399973	310
0.128259	0.087316	304
0.114602	0.0565056	310
0.194202	0.0266353	314
0.267931	0.0522416	320
0.295922	0.0617912	308
0.108396	0.120473	330
0.108446	0.201593	328
0.193682	0.184752	326
0.0517205	0.125241	328
0.144045	0.0761748	328
0.232773	0.0537517	322
0.259725	0.0729546	314
0.249877	0.0789953	312
0.23646	0.151409	298
0.153569	0.153941	302
0.0995922	0.150514	810
0.234532	0.0711335	810
0.198291	0.0994788	796
0.239415	0.0911951	796
0.298028	0.143703	782
0.121137	0.354853	782
0.111881	0.165556	782
0.108329	0.0427882	776
0.268266	0.0983536	776
0.257737	0.100693	776
0.241258	0.128328	776
0.217132	0.117534	812
0.243688	0.168473	812
0.305178	0.142075	812
0.183527	0.0299073	812
0.34028	0.101448	812
0.320054	0.188209	802
0.206374	0.0794839	802
0.167104	0.0555432	802
0.163395	0.0521527	802
0.109468	0.0884487	798
0.0811809	0.0736431	798
0.378835	-0.111701	794
0.312881	0.00122146	788
0.248615	-0.00676616	788
0.341934	0.00869829	788
0.2439	-0.0174262	788
0.180226	-0.0497542	788
0.171316	0.0076545	788
0.213367	-0.183005	786
0.379555	-0.0576974	784
0.260569	-0.0292041	784
0.270445	-0.0421219	778
0.193666	-0.0234595	808
0.336627	0.0452459	1300
0.217305	-0.058608	1300
0.265171	-0.0146575	1300
0.142297	-0.0107563	1300
0.239146	0.000903142	1300
0.213239	-0.206153	1316
0.259105	-0.123531	1312
0.265847	-0.094023	1310
0.290699	-0.0923351	1308
0.282834	-0.0953629	1306
0.178667	-0.163402	1296
0.230159	-0.119044	1306
0.20739	-0.0313213	1310
0.284052	-0.238119	1304
0.299168	-0.042877	1302
0.292861	0.0367771	1300
0.344984	0.0587782	1334
0.299994	0.0414853	1332
0.201	-0.2197	1780
0.235041	-0.0498283	1780
0.275824	-0.0582378	1780
0.300458	-0.304684	1774

## Sheet: Sheet2
0.279983	-0.0696907	-1542
0.249586	-0.0707342	-1546
0.261628	-0.0502569	-1552
0.28074	-0.0637152	-1550
0.369473	-0.281483	-136
0.325809	-0.274168	-136
0.380795	-0.230813	-106
0.347565	-0.221642	-102
0.365886	-0.23338	-104
0.37212	-0.138099	330
0.357323	-0.118837	292
0.303664	-0.156658	308
0.393196	-0.136996	298
0.370702	-0.105201	308
