# Supplementary material for: Spinal premotor interneurons controlling antagonistic muscles are spatially intermingled
Source: eLife. 2022 Dec 13;11:e81976. doi: 10.7554/eLife.81976 (PMC9844990; doi:10.7554/eLife.81976)
Supplement: Figure 12—figure supplement 4—source data 3. [file elife-81976-fig12-figsupp4-data3.xlsx]

## Sheet: Sheet1
0.247914	0.178032	-4018
0.218567	0.139915	-3550
0.280407	0.181728	-3552
0.299378	-0.0542157	-3556
-0.145447	-0.12622	-3536
0.237346	0.0862631	-3058
0.272991	-0.0142422	-2598
0.204225	-0.0151709	-2578
0.194636	0.147964	-2576
0.23547	0.184974	-2588
-0.235609	0.174052	-2110
0.200096	0.22469	-2090
0.221719	-0.00240101	-2122
-0.126194	-0.134835	-2122
-0.126717	-0.140318	-2098
0.113392	0.202064	-2102
0.164406	0.0338548	-2124
0.194931	-0.0289154	-1618
-0.117189	-0.193564	-1134
-0.165511	-0.123762	-1134
0.205153	0.193016	-1136
0.311149	-0.0316997	-1134
0.273826	-0.103661	-1144
0.238531	-0.307676	-1146
-0.0366239	-0.115924	-1146
-0.1595	-0.11079	-1154
-0.143871	-0.16259	-1154
0.0101047	-0.0470893	-1164
0.11907	0.0386467	-1170
0.27488	0.0719	-1164
0.228657	0.165593	-1146
0.189572	0.127989	-652
0.235153	0.197506	-662
0.219326	0.18951	-670
0.109059	0.146191	-674
0.239121	0.182814	-676
0.259986	0.128505	-648
0.222778	0.107444	-652
0.203141	0.166802	-650
0.144567	0.129259	-652
0.154961	0.077399	-652
0.284043	-0.011	-662
-0.0117689	0.0841071	-666
0.310116	0.130403	-674
0.230302	0.028675	-674
0.327353	-0.125322	-680
0.10381	0.0576147	-680
0.227185	-0.167365	-684
-0.174113	-0.157313	-684
-0.210973	-0.260802	-650
0.136842	0.147853	-658
0.0462667	-0.0229188	-662
-0.237204	-0.0366882	-668
-0.201883	-0.0825619	-682
0.291436	0.124023	-684
0.225261	0.141785	-686
0.259096	0.204869	-660
0.159645	-0.095601	-668
0.275452	-0.0742683	-178
0.197523	-0.00146341	-184
-0.11492	-0.162064	-194
0.240774	0.149625	-198
0.171905	0.0379646	-206
0.23935	0.154283	-210
0.246679	0.0712044	-210
0.210842	-0.120088	-172
0.258361	0.148886	-178
0.0525259	0.0649104	-182
0.127123	0.193794	-190
0.339591	0.0970252	-196
0.257813	0.0674693	-200
0.141863	0.108697	-208
0.271821	0.00890198	-180
0.233111	0.0985062	-190
0.126194	0.320439	-204
0.237938	0.178936	-208
0.160692	0.157066	-212
0.173943	0.262929	-208
0.0614308	0.190216	-206
0.314004	-0.0236879	-210
0.233449	-0.143609	-206
-0.158223	-0.223543	-188
-0.184021	-0.148714	-184
-0.133141	-0.215934	-190
-0.109049	-0.144125	-192
-0.0839092	-0.0715816	-194
0.0689183	0.102978	-196
0.108263	0.104951	-196
0.265256	0.096162	-206
0.237721	0.188663	-176
0.296106	0.0489836	-176
0.228318	0.165922	-184
0.170772	0.184142	-188
0.224548	0.067752	-190
0.174711	0.142708	-194
0.089747	0.172113	-198
0.193593	0.213884	-196
0.189643	0.154298	-200
0.26553	0.0695234	-206
0.241596	0.0192324	-202
0.257396	-0.117469	-204
0.228912	-0.201105	-212
0.194223	-0.0068663	-194
0.181452	-0.129734	-192
0.262285	-0.0317756	-194
0.112528	-0.0715479	-194
0.094775	0.0459637	-198
0.253155	-0.326318	-204
-0.0417477	-0.109622	-210
-0.124842	-0.0908079	-212
-0.0631707	-0.089389	-208
-0.115709	-0.164542	310
-0.057355	-0.0900397	308
0.0096269	-0.0321402	306
-0.11365	-0.115705	302
0.176316	0.00076823	298
0.145908	0.0192293	300
0.172971	-0.00976749	302
0.173372	0.0534076	300
0.203565	0.0260101	292
0.0145035	0.00148159	288
0.101684	-0.0223179	286
0.231463	-0.216123	288
0.189496	-0.263236	284
0.193801	-0.170798	282
0.148088	-0.280365	282
0.325711	-0.265118	282
0.336793	-0.264679	282
0.234445	-0.3098	284
0.183394	-0.298638	276
0.0837699	-0.217864	280
0.0738684	-0.157181	312
0.209205	0.0347663	298
0.183449	0.0613094	284
0.237531	-0.0703244	276
0.295682	-0.0499271	286
0.327721	-0.0827336	308
0.367074	-0.10299	304
0.361423	-0.100905	304
0.207431	0.222724	300
0.201193	0.161234	298
0.255434	0.159321	300
0.203087	0.116708	294
0.202319	0.212745	288
0.257504	0.192222	294
0.237767	0.12374	292
0.164613	0.196737	282
0.168122	0.176136	306
0.213769	0.153278	308
0.157364	0.247566	316
0.286665	0.1052	290
0.239321	0.228086	762
0.278043	0.119146	784
0.270157	0.0829139	786
0.0968071	0.0751219	786
0.104973	0.126664	786
0.0783771	0.216798	770
0.0729403	0.173847	766
0.10159	0.262899	758
0.101349	0.219957	756
0.101349	0.219957	788
0.295485	0.108448	776
0.248379	0.154641	768
0.234799	0.16028	788
0.21351	0.0893745	774
0.197983	0.108655	758
0.192479	0.102895	760
0.17434	0.0708132	770
0.183401	0.0608954	770
0.240985	0.189557	768
0.232367	0.143784	774
0.25346	0.139754	782
0.189851	0.168425	786
0.245983	0.113489	770
0.233234	0.073654	782
0.251477	0.0673245	784
0.218518	0.141107	784
0.269755	0.158693	764
0.240938	0.231756	760
0.245972	0.218527	756
0.203126	0.167272	758
0.125963	0.171487	1238
0.120898	0.105522	1224
0.0812421	0.216583	1240
0.117887	0.069966	1234
0.125369	0.0915175	1230
0.189438	0.0539465	1724
0.233337	0.042918	1724
0.279535	0.00402267	1724
0.198412	0.0251755	1736
0.140395	-0.0419853	1730
0.229589	0.0322739	2690
0.281425	-0.116031	2662
0.351054	-0.0731699	2662
0.336499	0.0693394	2684

## Sheet: Sheet2
0.298808	-0.0461355	-2124
0.279919	-0.0147723	-2106
0.308137	-0.0212103	-1626
0.316183	-0.0332071	-1620
0.262174	-0.173539	-664
0.318694	-0.0992661	-676
0.381276	0.0535264	304
0.382273	0.0385607	290
