# Supplementary material for: Spinal premotor interneurons controlling antagonistic muscles are spatially intermingled
Source: eLife. 2022 Dec 13;11:e81976. doi: 10.7554/eLife.81976 (PMC9844990; doi:10.7554/eLife.81976)
Supplement: Figure 12—figure supplement 4—source data 4. [file elife-81976-fig12-figsupp4-data4.xlsx]

## Sheet: Sheet1
0.221186	0.186636	-4548
0.0552756	0.00456942	-4032
0.0941774	0.187651	-4038
0.189491	0.162171	-4040
0.161572	-0.0670244	-4046
0.236242	0.249346	-4052
0.163488	0.0208759	-4030
0.13569	0.0387001	-4040
0.245483	0.0330684	-4040
0.167879	0.0930117	-4048
0.220223	0.206757	-4050
-0.057827	-0.0875879	-4058
-0.173853	-0.102279	-4058
-0.153707	-0.165315	-4060
-0.189284	-0.0826084	-3560
-0.147389	-0.122058	-3572
-0.207421	-0.12991	-3560
0.29997	0.02586	-3566
0.309295	-0.0677005	-3562
0.223464	-0.00465441	-3572
0.24816	0.111932	-3578
0.254976	0.0239412	-3590
0.208728	0.0539735	-3076
0.203597	-0.0599071	-3076
0.250858	0.120749	-3090
-0.226878	-0.0346146	-3088
-0.189132	-0.0233503	-3098
0.303258	-0.0666956	-3102
0.308023	-0.0454566	-3098
0.223358	0.180286	-3102
0.176833	0.305026	-3088
0.263994	0.0973386	-3088
0.18222	0.125676	-3078
0.0449788	0.030909	-3074
-0.0731432	-0.0693913	-3078
-0.139242	0.0384077	-3076
-0.057423	-0.0849764	-3074
-0.24829	0.0296592	-3076
0.302263	0.175185	-3070
0.297878	0.0923073	-3070
0.151671	0.0954038	-3070
0.275932	-0.056996	-3066
0.181017	0.238467	-3080
0.246891	0.139174	-2608
0.302226	0.152847	-2598
0.291812	0.0395456	-2612
0.243832	0.262372	-2614
0.151686	-0.0174504	-2620
0.12126	0.00965323	-2616
0.326673	-0.037503	-2592
0.237389	0.116053	-2590
0.153693	0.122395	-2590
0.292834	-0.011901	-2592
0.197259	0.166418	-2590
-0.156535	0.211376	-2598
0.148301	0.00923518	-2598
-0.0459062	-0.0972766	-2600
0.0808054	0.0641475	-2602
-0.173136	-0.12907	-2602
-0.0605351	-0.112986	-2608
0.340281	-0.0386239	-2606
0.30106	0.00162083	-2608
0.352621	0.128197	-2612
0.285232	0.10034	-2614
0.271788	0.0833393	-2616
0.266221	-0.00687518	-2616
0.229242	0.0262539	-2620
0.209207	0.0798393	-2618
0.192242	-0.0244194	-2610
0.216363	0.191882	-2602
0.187792	0.125071	-2616
0.125668	0.241753	-2120
0.249573	0.0156473	-2124
0.29599	0.0880771	-2126
0.33025	0.159394	-2122
0.316752	0.132035	-2132
0.190882	0.171568	-2132
0.275848	0.079207	-2136
0.202993	0.0279816	-2134
0.0762007	0.0958339	-2136
0.347282	-0.102344	-2144
0.264255	-0.0645928	-2122
-0.196115	-0.087314	-2112
-0.218927	-0.17185	-2130
-0.13197	-0.0858546	-2142
-0.28664	0.0515191	-2108
-0.149881	-0.0796796	-2112
-0.0671939	-0.116777	-2112
-0.0690223	-0.145604	-2112
-0.170229	-0.0459246	-2114
-0.160462	0.027729	-2116
-0.104338	-0.0307263	-2116
0.031577	0.0236018	-2118
-0.182496	-0.214582	-2120
-0.0836371	0.188893	-2120
-0.0311523	0.156511	-2124
0.307082	0.0363992	-2122
0.258048	0.0280114	-2124
0.300648	0.0731749	-2126
0.253878	0.0821198	-2128
0.122321	0.115388	-2126
0.0784411	0.129268	-2128
0.0663564	0.191953	-2136
0.236332	0.161525	-2138
0.174806	0.144812	-2140
0.261521	0.12012	-2144
0.132383	0.228454	-2146
0.138251	0.208257	-2148
0.220113	0.169599	-2150
0.179194	0.163573	-2150
0.184832	0.0885302	-2156
0.106591	0.158904	-2154
0.0857957	0.182749	-2154
0.0876712	0.111041	-2154
0.170441	0.111669	-2158
0.178403	0.0563132	-2156
0.12652	0.0670234	-2158
0.204389	0.131308	-2120
0.274302	0.0311735	-2120
0.276077	0.0548773	-2122
0.331741	0.0191372	-2124
0.260342	0.0437747	-2130
0.233578	0.0360853	-2140
0.250952	0.145926	-2116
0.178657	0.182231	-2110
0.170972	0.127511	-2116
0.126898	0.0559679	-2118
0.0745131	0.209207	-2120
0.0910094	0.16555	-2138
0.266287	0.0151905	-2132
0.289477	0.022519	-2108
0.26204	0.0340374	-2118
0.224253	0.146067	-2120
0.140498	0.192667	-2116
0.0383123	-0.101539	-2118
0.123324	0.0251397	-2124
0.24256	-0.0235312	-2130
0.230233	-0.027266	-2126
0.0577928	0.0159673	-2144
0.232657	-0.0913941	-2150
0.221912	-0.0415307	-2136
0.276856	-0.0474311	-1620
0.216975	-0.168908	-1626
0.319869	-0.0425978	-1634
0.274455	-0.0202749	-1640
0.322823	-0.0922965	-1648
0.283656	-0.0674785	-1652
0.325312	-0.0336922	-1648
0.263621	0.00395455	-1660
0.324245	-0.104788	-1658
0.279109	-0.0305379	-1646
0.263037	-0.0646695	-1624
-0.262143	0.00232622	-1626
-0.162166	-0.182686	-1628
-0.0730243	-0.173536	-1628
-0.133435	-0.156267	-1626
-0.180568	-0.0957398	-1626
-0.0871648	-0.0796388	-1634
-0.0635224	-0.0280788	-1636
-0.0588315	-0.130688	-1636
-0.114975	-0.176592	-1638
-0.183847	0.130341	-1636
0.227137	0.0813082	-1638
0.318088	0.0620416	-1636
0.225793	0.20634	-1626
0.13388	0.113976	-1642
0.102388	0.121	-1646
0.101734	0.147063	-1648
0.123614	0.235833	-1650
0.173169	0.141744	-1654
0.20249	0.145922	-1654
0.157485	0.0967159	-1652
0.0879806	0.116867	-1652
0.0808737	0.245749	-1650
0.312042	0.0970443	-1652
0.124294	0.210491	-1650
0.323715	0.161503	-1662
0.288803	0.0655537	-1666
0.217938	0.136389	-1666
0.293792	0.010135	-1664
0.305992	0.084802	-1662
0.267566	0.104935	-1664
0.287072	0.0572979	-1666
0.120686	0.0478289	-1640
0.136343	0.0584291	-1640
0.233098	0.130925	-1640
0.245487	0.124247	-1646
0.218801	0.0831965	-1666
0.169205	0.162635	-1626
0.126778	0.0816822	-1660
0.129591	0.104488	-1664
0.0903495	0.159132	-1656
0.298681	0.0726783	-1648
0.0855384	0.139445	-1648
0.216307	0.258894	-1642
0.193778	0.223299	-1640
0.234489	0.289765	-1642
0.113615	0.117369	-1640
0.235572	0.13618	-1636
0.172661	0.17256	-1638
0.346295	-0.138086	-1630
0.175407	0.00545521	-1632
0.146441	-0.0973819	-1164
0.286428	-0.075488	-1164
0.159169	-0.246497	-1164
0.308523	-0.117278	-1164
0.298545	-0.1343	-1172
0.253849	-0.0877395	-1174
0.240101	-0.0194125	-1182
0.266781	-0.0380496	-1184
0.254853	-0.0211914	-1192
0.334242	-0.00851122	-1188
0.157282	0.00230797	-1154
-0.166477	-0.210727	-1154
-0.0829297	-0.129375	-1154
-0.0942396	-0.100843	-1152
-0.146334	-0.0727387	-1156
-0.213269	-0.01886	-1154
-0.117264	-0.136444	-1160
-0.12507	-0.0653064	-1162
-0.0531656	-0.0622736	-1162
-0.131651	-0.126981	-1162
0.0496726	-0.00908223	-1158
0.231527	0.161094	-1158
0.241601	0.243409	-1162
0.280002	0.172085	-1162
0.21234	0.137196	-1168
0.189223	0.14276	-1168
0.181531	0.157536	-1172
0.288048	0.13477	-1172
0.0889427	0.169699	-1168
0.0528594	0.180512	-1170
0.19054	0.157059	-1170
0.117985	0.223012	-1170
0.199242	0.178846	-1168
0.211875	0.100851	-1178
0.20115	0.150888	-1182
0.155987	0.15067	-1180
0.146957	0.143682	-1176
0.0850999	0.101312	-1176
0.159529	0.09523	-1172
0.200849	0.219656	-1176
0.0962512	0.231698	-1176
0.197034	0.15329	-1174
0.224551	0.0972114	-1180
0.245657	0.139655	-1182
0.233391	0.137714	-1182
0.194552	0.132513	-1172
0.181717	0.119719	-1152
0.208081	0.130645	-1156
0.192623	0.0924317	-1156
0.158365	0.0649182	-1162
0.12625	0.206158	-1164
0.11634	0.116452	-1164
0.126349	0.214237	-1166
0.124884	0.192134	-1164
0.164843	0.105639	-1162
0.0943216	0.116993	-1166
0.043594	0.0373965	-1172
0.377981	-0.0570652	-1172
0.319327	-0.0167492	-1174
0.223185	0.0619258	-1174
0.183494	-0.0194666	-1180
0.169074	0.0275945	-1180
0.278931	0.00313794	-1184
0.280811	-0.0113467	-1184
0.363145	0.101651	-1182
0.338257	0.0204047	-1180
0.211722	-0.0395235	-1186
0.322005	-0.0556823	-1186
0.156643	-0.00311368	-1186
0.117603	-0.00145575	-1186
0.11534	-0.0568388	-716
0.244914	-0.091251	-680
0.156671	-0.00593621	-686
0.194651	0.0210032	-690
0.202429	0.0629772	-690
0.216155	0.0584563	-698
0.252014	0.0785536	-696
0.120866	-0.0316705	-700
0.323836	-0.088574	-708
0.260536	-0.111656	-712
0.270901	-0.265156	-714
-0.167371	0.119656	-716
-0.0403812	-0.107327	-710
-0.192413	-0.119128	-666
-0.155754	-0.0430771	-672
-0.0792875	-0.0908242	-674
-0.148867	-0.116586	-674
0.00580859	-0.0566321	-670
-0.14972	-0.206582	-672
-0.0998938	-0.176995	-670
-0.0776088	-0.156756	-672
-0.106233	-0.117284	-676
-0.149007	-0.133723	-680
-0.040333	-0.116497	-680
0.319848	0.155838	-676
0.23354	0.0455217	-676
0.179787	0.133828	-672
0.242931	0.142397	-668
0.121691	0.155903	-668
0.0591693	0.232027	-674
0.118607	0.120176	-678
0.139873	0.0798031	-682
0.130685	0.0765464	-682
0.132605	0.137101	-684
0.11393	0.210773	-688
0.166567	0.20114	-688
0.159412	0.112704	-690
0.273047	0.079259	-690
0.272135	0.130904	-694
0.264218	0.128947	-696
0.0830044	0.174891	-696
0.195695	0.155164	-694
0.20027	0.0896547	-698
0.156934	0.071381	-698
0.147773	0.123124	-698
0.144088	0.144208	-700
0.109344	0.21407	-698
0.0945786	0.226342	-694
0.0877939	0.212844	-696
0.0973462	0.137402	-700
0.124378	0.12997	-694
0.111254	0.195341	-692
0.12729	0.184369	-690
0.129548	0.179512	-690
0.0610411	0.119234	-686
0.21776	0.20888	-690
0.216806	0.246889	-688
0.267265	0.230321	-674
0.282368	0.129499	-680
0.291052	0.102259	-684
0.231314	0.12245	-686
0.235755	0.135534	-684
0.249067	0.118633	-684
0.251486	0.187683	-682
0.303103	0.146279	-686
0.368966	0.194911	-686
0.420825	0.232685	-686
0.320915	0.161028	-684
0.20049	0.118763	-680
0.245168	0.161823	-690
0.31449	0.132188	-696
0.326423	0.0135144	-694
0.270885	0.065103	-694
0.227227	0.0769524	-702
0.248884	0.264018	-702
0.121557	0.274706	-702
0.166325	0.230467	-700
0.189989	0.134713	-694
0.236479	0.103697	-668
0.22617	0.127908	-674
0.227297	0.111445	-680
0.144437	0.117861	-676
0.198221	0.101626	-702
0.270048	0.0598077	-668
0.165617	0.135582	-672
0.191329	0.176572	-676
0.261955	0.00823533	-678
0.220844	0.0958921	-680
0.152976	0.244729	-680
0.260711	0.119217	-684
0.266611	0.171066	-684
0.0702555	0.16041	-692
0.188701	0.180844	-690
0.196237	0.160224	-700
0.264106	0.16011	-706
0.0573618	0.0274836	-696
0.23274	-0.146157	-696
0.15858	0.0234065	-678
0.214714	-0.0308784	-678
0.16544	0.0434832	-694
0.160206	-0.0882821	-682
0.0801993	0.0189802	-682
0.0396143	0.00877948	-708
0.144051	-0.0629995	-706
0.170203	0.0292054	-698
0.192756	-0.18484	-208
0.254977	-0.279587	-212
0.10389	0.0762459	-220
0.255449	-0.19634	-236
0.00951472	0.0447745	-238
0.269694	-0.0883715	-246
0.393295	-0.120728	-240
0.373804	-0.135266	-246
0.242979	-0.304918	-246
0.303323	-0.223637	-250
0.360245	-0.074654	-248
-0.206011	-0.0592585	-252
-0.153749	-0.0372861	-260
-0.190805	-0.168644	-228
-0.134166	-0.17169	-238
-0.208907	0.00884877	-244
-0.0945282	-0.128449	-256
-0.000717353	0.0665961	-260
0.0265682	0.0152813	-258
0.0278458	-0.00247281	-264
0.0167138	-0.0272332	-252
0.0871243	-0.00216573	-232
-0.102393	-0.118881	-234
0.077516	0.0624747	-234
0.0920463	0.238286	-238
0.24767	0.22842	-238
0.261792	0.223797	-238
0.288554	0.253641	-236
0.17383	0.213421	-240
0.239816	0.255944	-238
0.115619	0.216694	-242
0.0998272	0.215765	-240
0.168395	0.168199	-244
0.185391	0.150793	-240
0.233653	0.156724	-238
0.248822	0.17287	-240
0.313357	0.135988	-242
0.29346	0.135188	-246
0.243418	0.0526967	-244
0.271552	0.0216573	-244
0.221034	0.0833481	-248
0.2102	0.0727377	-246
0.199937	0.0332536	-244
0.162781	0.0615293	-246
0.208865	0.109636	-248
0.220123	0.121143	-250
0.18813	0.128214	-250
0.226505	-0.0179319	-254
0.131365	0.0679537	-252
0.127202	0.159334	-248
0.170149	0.138938	-250
0.146665	0.116909	-254
0.0912399	0.131705	-256
0.0736779	0.129216	-244
0.071175	0.145952	-242
0.107535	0.0686487	-244
0.184066	0.0272736	-242
0.147775	0.0650041	-242
0.12915	0.0530765	-252
0.0986753	0.0716952	-254
0.109504	0.0890615	-254
0.263048	-0.00475975	-256
0.209734	0.0581514	-258
0.211546	-0.0119277	-256
0.244167	0.159642	-254
0.224893	0.151431	-254
0.257037	0.134146	-258
0.309148	0.0217623	-258
0.252398	-0.0547088	-258
0.0828673	0.130267	-260
0.0854278	0.150235	-256
0.0629228	0.111187	-242
0.128856	0.134429	-246
0.157441	0.132214	-246
0.208336	0.143035	-256
0.230412	0.128667	-256
0.29103	0.0350234	-244
0.17128	0.115042	-242
0.204419	-0.0139641	-246
0.233862	-0.0498117	-250
0.235972	-0.0264493	-250
0.231323	-0.00514764	-252
0.308624	-0.115478	-256
0.257681	-0.121329	-242
0.262383	-0.13758	254
0.259404	-0.128748	252
0.244968	-0.144708	256
0.206221	-0.0318394	258
0.0986805	-0.0894655	260
0.194643	-0.138946	262
0.113436	-0.213227	262
0.229076	-0.275734	260
0.206734	-0.230892	258
0.184276	-0.221462	254
0.192156	-0.234375	258
-0.265086	0.243414	268
-0.117247	-0.123647	266
-0.146496	-0.0791727	278
-0.15278	-0.156537	278
-0.145731	-0.0414803	282
-0.193585	0.0255499	284
-0.187252	-0.0032804	290
-0.0963361	-0.12001	288
-0.0873122	-0.126864	284
-0.0747635	-0.134482	282
-0.166731	-0.174226	280
-0.192865	-0.125934	282
-0.108223	-0.149455	278
-0.0944652	-0.110712	276
-0.195555	-0.199397	274
-0.184399	-0.156501	272
0.00460083	-0.0431526	272
0.241011	0.43029	264
0.270398	0.361866	262
0.166346	0.295615	260
0.250573	0.375616	258
0.052564	0.265305	258
0.0620224	0.385965	264
0.248376	0.216592	262
0.204322	0.230393	262
0.170349	0.254685	256
0.206796	0.197353	252
0.247561	0.172403	250
0.211263	0.219244	250
0.163631	0.177799	250
0.233073	0.17782	252
0.268255	0.220001	250
0.224602	0.247123	246
0.1085	0.398736	244
0.257336	0.387037	240
0.236509	0.157824	252
0.129811	0.16199	242
0.152193	0.146782	266
0.097822	0.164449	266
0.114971	0.21254	278
0.102842	0.138913	274
0.183495	0.19017	274
0.232026	0.189313	272
0.172043	0.162262	268
0.134229	0.193229	264
0.128863	0.166486	266
0.193245	0.15112	264
0.355059	0.251004	264
0.107744	0.138291	270
0.259133	0.175398	272
0.202269	0.0227913	272
0.227203	0.00788296	274
0.106732	0.0736625	276
0.146842	0.0764069	272
0.184468	0.036163	268
0.189853	0.0143437	264
0.244076	0.0507354	262
0.257839	0.0750561	266
0.225071	-0.0454539	268
0.247749	-0.0509498	270
0.271192	-0.0363488	272
0.281243	-0.0217049	262
0.246905	-0.0328898	260
0.260362	-0.0271365	258
0.0795174	-0.0463615	256
0.040667	0.00723975	254
0.0729666	0.0342405	258
0.107256	0.0833036	260
0.114651	0.0876131	258
0.163576	0.0856763	256
0.23248	0.149462	258
0.251841	0.154029	254
0.218727	0.111834	254
0.24572	0.102822	244
0.267658	0.0615986	244
0.176796	0.0480053	248
0.112089	0.0741056	240
0.111694	0.126671	244
0.166504	0.0535584	246
0.158112	0.0776933	250
0.134797	0.0616701	248
0.187484	-0.0144509	248
0.105612	0.103529	246
0.0813933	0.0864625	248
0.029392	0.0542588	246
0.162959	0.0595332	244
0.130418	0.0943812	244
0.100532	0.117594	252
0.190954	0.0570675	256
0.163384	0.120639	254
0.231143	0.0479696	252
0.255317	-0.00467403	262
0.223683	-0.00608911	276
0.171149	0.037671	268
0.238858	0.129851	264
0.251254	0.142922	264
0.24534	0.115764	266
0.220065	0.141014	266
0.162638	0.133224	256
0.198887	0.13003	254
0.229321	-0.0241063	252
0.207235	-0.0294807	248
0.204984	-0.0463973	248
0.296117	0.0638356	258
0.322547	0.0433885	286
0.312644	0.0401509	276
0.284427	0.0471763	274
0.281485	0.0845257	260
0.337342	-0.0121639	260
0.313094	0.149612	262
0.315991	0.115271	256
0.309529	0.0361987	238
0.335846	0.0271365	248
0.235452	-0.081624	766
0.346035	-0.00581038	768
0.233611	-0.311809	764
0.285997	-0.0798731	760
0.241998	-0.212411	748
0.267416	-0.187712	742
0.237674	-0.159467	744
0.208607	-0.171517	740
0.290228	-0.0797873	734
0.366744	-0.101614	736
0.280759	-0.254806	756
-0.0852437	0.0587732	744
0.0571835	0.139992	744
-0.183083	0.166821	742
-0.127613	0.243682	740
-0.253157	0.241175	738
0.0511183	0.107259	732
-0.0578342	0.0409111	770
-0.167478	0.248723	770
-0.131639	0.0929454	766
-0.281589	0.125492	764
-0.126823	-0.102211	770
-0.162279	0.0117069	760
-0.145303	-0.0151228	756
-0.106245	-0.0931642	752
-0.110823	-0.0806084	756
-0.193714	-0.15544	758
-0.156661	-0.133531	750
0.0649974	0.122601	748
0.207314	0.133206	744
0.157364	0.130898	744
0.131029	0.220879	742
0.299826	0.046277	744
0.144025	0.248683	740
0.194556	0.13383	740
0.283977	0.0785323	754
0.170819	0.138778	766
0.339418	0.0608426	744
0.148719	0.0715214	746
0.161506	0.145955	772
0.266281	0.185042	766
0.256568	0.135926	766
0.176291	0.0776568	758
0.0614477	0.102835	752
0.285087	0.0417999	752
0.275606	0.0941658	748
0.0563528	0.0090007	748
0.428211	0.0904382	742
0.392645	0.00925938	738
0.331168	0.021351	744
0.336716	-0.0303251	740
0.311979	-0.0375814	738
0.262464	-0.0255761	736
0.289345	-0.15668	756
0.352821	-0.185937	766
0.32616	-0.0139819	1250
0.317928	-0.0133319	1244
0.228351	0.0204489	1236
0.236908	-0.0332568	1232
0.250834	-0.0793083	1230
0.232237	-0.0145391	1220
0.31543	0.00470265	1252
0.294725	-0.17754	1248
0.128409	0.0379927	1244
0.261558	-0.218809	1238
0.141962	-0.165196	1236
-0.307615	-0.0539005	1234
-0.331656	-0.19264	1232
-0.275412	-0.19697	1228
-0.173771	-0.186111	1218
-0.140844	-0.0265473	1228
-0.103962	-0.140222	1228
0.287901	0.0442773	1238
0.0938876	0.08152	1240
0.262602	0.268649	1254
0.143605	0.157522	1244
0.384015	0.23353	1248
0.221878	0.182116	1252
0.307137	0.210527	1226
0.243743	0.149988	1220
0.026003	0.157406	1720
-0.143051	0.0873253	1704
-0.120928	0.0662214	1676

## Sheet: Sheet2
0.371937	-0.134811	-694
0.39219	-0.113857	-694
0.328553	-0.208409	-714
0.371348	-0.0964799	-238
0.369437	-0.125903	-242
0.322913	-0.0214714	-252
0.344277	-0.0269019	-252
0.387512	-0.0879463	-248
0.344334	-0.1687	-238
0.302058	-0.248008	-256
0.323578	-0.267007	-246
0.331783	-0.0477838	240
0.296903	-0.223572	-696
0.262534	-0.2572	278
