# Supplementary material for: Spinal premotor interneurons controlling antagonistic muscles are spatially intermingled
Source: eLife. 2022 Dec 13;11:e81976. doi: 10.7554/eLife.81976 (PMC9844990; doi:10.7554/eLife.81976)
Supplement: Figure 12—figure supplement 4—source data 5. [file elife-81976-fig12-figsupp4-data5.xlsx]

## Sheet: Sheet1
0.151208	0.0874685	-4542
0.185438	0.142292	-3294
0.130043	0.157122	-3312
0.180488	0.0449118	-2384
0.126917	0.114529	-2154
0.264592	-0.0695174	-2138
0.236095	0.182195	-1906
0.165499	-0.0329423	-1912
0.106022	0.173752	-1676
0.290882	-0.00975427	-1660
0.329767	-0.115844	-1654
0.184055	0.187794	-1656
0.115756	0.180072	-1654
0.327586	-0.0330854	-1652
-0.106252	-0.173849	-1652
-0.112252	-0.139125	-1406
0.247665	0.145112	-1418
0.223187	0.0893427	-1420
0.338559	0.0416318	-1438
0.264987	0.0728787	-1430
0.279232	-0.097181	-1430
-0.170548	-0.122905	-1188
0.154073	-0.0341986	-1176
0.178248	-0.0829155	-1198
0.149894	-0.0362394	-1166
0.342781	-0.0151821	-1180
0.141048	0.142987	-1196
0.235998	0.19527	-1198
-0.0772039	-0.186286	-950
0.0898756	0.0294147	-952
0.0795714	0.05153	-960
0.202627	0.106254	-956
0.157465	0.12208	-930
0.247121	0.156941	-936
0.32896	-0.0188939	-930
0.287363	-0.280615	-942
0.0842099	0.017567	-694
0.0257647	0.0197897	-706
0.0389778	0.017554	-712
0.237051	-0.118992	-696
0.214989	-0.114943	-710
0.190772	0.0797762	-714
0.341995	-0.0534614	-716
0.310432	-0.0540853	-708
0.224696	0.159679	-450
0.170726	0.0933825	-450
0.206431	0.0959996	-452
-0.0279375	0.00457493	-452
0.222625	0.0195646	-448
0.0544247	-0.00304099	-448
0.234223	-0.0862173	-454
0.18536	0.0711537	-456
0.160428	0.0186429	-470
0.138822	0.0209909	-472
0.234268	0.179755	-472
0.176548	-0.0261713	-474
0.228587	0.199447	-462
0.251669	0.0128433	-200
0.0010662	-0.0860133	-200
0.206388	0.062367	-200
0.217889	-0.0918625	-200
0.198915	0.124712	-200
0.228305	-0.197743	-200
0.297946	-0.257262	-200
0.140539	-0.0123296	-200
0.177438	0.0820869	-200
0.204191	-0.253666	-200
0.0736325	0.0564371	-200
0.27627	-0.111406	-200
0.0908446	0.0556224	-200
0.215121	-0.332303	-200
0.248869	-0.346482	-200
0.134573	0.198638	-232
0.0407949	-0.026271	28
-0.112272	-0.207946	26
-0.160509	-0.0946735	16
0.175884	0.0910917	32
0.101727	0.149191	34
0.11459	0.0662935	28
0.144001	0.115234	30
0.230089	0.0877442	24
0.275049	0.104127	24
0.194452	0.12154	30
0.213313	0.116472	24
0.234413	0.189407	20
0.172171	0.0511964	18
0.149348	0.0232382	18
0.112892	0.147202	20
0.115464	0.0546711	10
0.0508435	-0.00502792	26
0.108707	0.0287147	24
0.0570792	0.117945	22
0.250921	-0.0310379	32
0.211303	-0.120556	32
0.16103	-0.137066	10
0.251978	-0.01499	32
0.229096	0.00139925	32
0.239582	-0.231438	28
0.281369	-0.271501	26
0.21737	-0.265522	16
0.231335	-0.297946	14
0.211744	-0.285051	12
0.28693	-0.315239	8
0.267687	-0.234304	22
0.166363	0.0611222	238
-0.067002	-0.147833	250
0.203407	-0.229771	260
0.241033	-0.275702	260
0.287345	-0.313827	256
0.272445	0.0386987	270
0.14501	0.0762624	268
0.12787	0.0235207	270
0.0636086	0.0700827	266
0.29283	0.0109847	262
0.289948	-0.0868751	260
0.26624	-0.0318632	240
0.162144	-0.00291959	256
0.0854935	0.0745851	258
0.0407411	0.0393987	260
0.19705	0.131848	244
0.127323	0.203482	260
0.175348	0.131091	258
0.0497817	0.221744	268
-0.00923477	0.0543843	534
-0.145016	-0.0866685	536
0.180086	0.128887	556
0.233429	0.107054	556
0.198173	0.103733	532
0.172306	0.0608661	532
0.216807	0.105245	526
0.280814	-0.0145588	554
0.310743	-0.100698	552
0.282051	0.0459859	552
0.273889	-0.00774368	538
0.231905	-0.126048	528
0.301816	0.0263083	524
0.144291	0.0500248	498
0.15438	0.156203	504
0.137767	0.0755259	724
-0.212698	-0.0861157	750
-0.11645	-0.0485423	978
0.315458	-0.0019851	970
0.2482	0.0628416	970
-0.158938	-0.141933	1712
0.256085	-0.0347482	-4251
0.238649	0.125569	-4064
-0.09026	-0.130345	-3122
-0.101372	-0.0758633	-2882
0.1985	-0.037952	-2628
0.0416983	0.0185497	-2164
0.294141	-0.096007	-2138
0.345295	-0.0491072	-1904
0.182868	0.152212	-1412
-0.0853483	-0.140996	-1180
0.0417643	0.00720974	-1178
0.281381	-0.0497055	-1188
0.21938	0.1828	-1180
-0.143035	-0.193438	-948
0.0482144	0.0219118	-940
0.226143	0.117848	-960
0.175602	0.104655	-716
0.0491483	0.0580344	-472
0.200121	0.139038	-200
0.218649	0.206021	-200
0.261246	-0.315526	-200
-0.150311	-0.161677	32
0.284884	0.059853	30
0.226008	0.140701	28
0.200663	0.105345	28
0.198136	0.0723257	16
0.109045	0.176305	22
0.0828708	0.161409	34
0.103569	0.0592772	10
0.0631758	-0.0154252	28
0.223625	-0.0121045	32
0.299491	-0.143607	32
0.268402	-0.289055	16
0.276522	-0.223408	238
0.179121	-0.0384276	258
0.232382	0.135411	270
0.249101	0.128153	232
0.186541	0.0731789	270
-0.178567	-0.131262	542
0.198545	0.0802343	536
0.257612	0.0108983	534
0.126716	0.219468	736
0.386718	-0.0670037	968
0.277803	-0.0219199	1216

## Sheet: Sheet2
0.284914	-0.146613	20
0.320531	-0.146318	12
0.309068	-0.13645	10
0.344575	-0.207229	8
0.136926	-0.275364	10
0.307336	-0.154871	280
0.29597	-0.119659	234
