# Supplementary material for: Spinal premotor interneurons controlling antagonistic muscles are spatially intermingled
Source: eLife. 2022 Dec 13;11:e81976. doi: 10.7554/eLife.81976 (PMC9844990; doi:10.7554/eLife.81976)
Supplement: Figure 12—figure supplement 4—source data 6. [file elife-81976-fig12-figsupp4-data6.xlsx]

## Sheet: Sheet1
0.211395	0.13947	-3516
0.242761	0.0115353	-3510
0.128418	-0.0285063	-3530
0.203732	-0.0709142	-3534
0.23386	-0.0878774	-3538
0.129055	-0.164743	-3540
-0.28023	0.128301	-3028
-0.2377	-0.176447	-3042
-0.0475726	-0.0698718	-3044
0.0788119	-0.203567	-3044
-0.0587818	-0.104447	-3064
0.262477	-0.150449	-3034
0.305739	-0.177938	-3032
0.327219	-0.12319	-3034
0.310959	-0.048423	-3050
0.32744	-0.0741754	-3040
0.241552	0.0100366	-3042
0.146097	-0.0809536	-3042
0.182682	-0.0882466	-3048
0.13264	-0.0549783	-3052
0.113024	-0.0765808	-3056
0.100247	-0.0537334	-3060
0.176552	-0.0786481	-3064
0.370547	-0.0731687	-3028
0.35828	0.0514432	-3054
0.199837	-0.0869301	-2544
0.290712	-0.055857	-2544
0.211748	-0.0107972	-2544
0.231538	0.0497059	-2544
0.273419	0.0688151	-2544
0.317091	0.113751	-2544
0.13844	-0.011674	-2544
0.181767	0.0446525	-2546
0.34027	-0.0678486	-2536
0.324119	0.0337448	-2536
0.165537	0.0195786	-2510
0.293269	0.0802405	-2510
0.333254	0.0382528	-2526
0.259752	0.149946	-2522
0.187968	0.217387	-2520
0.199412	0.141179	-2508
0.231641	0.180971	-2506
0.136746	0.119888	-2506
0.234763	0.151748	-2506
0.168246	0.101283	-2524
-0.250471	-0.190491	-2544
-0.0757013	-0.113654	-2546
-0.0819211	-0.139915	-2514
-0.158248	-0.167364	-2506
0.272221	0.101521	-2050
0.178093	0.100619	-2042
0.134976	0.193266	-2034
-0.226093	-0.197371	-2046
-0.238803	-0.1806	-2034
-0.327484	0.066043	-1542
-0.102191	-0.112946	-1538
-0.100793	-0.155935	-1538
-0.0895621	-0.0900967	-1540
-0.0719589	-0.182985	-1550
-0.0716847	-0.1662	-1560
-0.128031	-0.123265	-1564
-0.125563	-0.0987121	-1566
-0.111744	-0.00666227	-1564
-0.0964059	-0.164461	-1536
0.213453	0.231119	-1534
0.145832	0.153749	-1538
0.232169	0.192724	-1544
0.188781	0.228756	-1548
0.161521	0.105874	-1542
0.109924	0.202945	-1546
0.216063	0.188791	-1550
0.259775	0.202526	-1556
0.0711364	0.0915683	-1556
0.18905	0.120108	-1558
0.148546	0.12356	-1568
0.19291	0.148737	-1564
0.100267	0.304119	-1560
0.204629	0.148184	-1568
0.267249	0.212461	-1574
0.130801	0.0978916	-1570
0.23252	0.160867	-1566
0.109737	0.0796796	-1534
0.137189	0.0419357	-1548
0.0808976	0.101272	-1548
0.17216	-0.0211195	-1548
0.155379	0.0358442	-1554
0.133647	0.00611823	-1560
0.156947	-0.069655	-1572
0.164466	-0.0109076	-1572
0.116422	-0.0290036	-1576
-0.0266734	0.0323035	-1532
0.321973	0.0380561	-1534
0.258234	0.079635	-1536
0.188984	-0.0454586	-1536
0.196108	-0.0654008	-1538
0.154672	0.0507652	-1540
0.269942	0.0392512	-1542
0.189181	0.0850576	-1542
0.224371	0.0400271	-1560
0.22441	0.0149477	-1560
0.304008	0.0270415	-1560
0.257104	-0.027639	-1562
0.270951	0.102601	-1566
0.204673	0.00358532	-1564
0.243033	-0.0496058	-1568
0.263169	-0.0226981	-1572
0.187262	-0.0219578	-1572
0.273183	-0.0855749	-1532
0.204185	-0.110868	-1540
0.284628	-0.115033	-1550
0.184531	-0.183511	-1558
0.237247	-0.162659	-1558
0.205798	-0.231003	-1564
0.155862	-0.127198	-1566
0.200747	-0.103849	-1572
0.304227	-0.124407	-1568
-0.0996296	-0.103628	-1112
-0.0539418	-0.139041	-1116
-0.182587	-0.121518	-1120
-0.0987037	-0.147503	-1122
-0.108582	-0.134026	-1130
-0.0615767	-0.146945	-1132
0.169873	-0.0907447	-1108
0.20291	-0.0913874	-1108
0.285603	0.00072042	-1108
0.200661	-0.11086	-1110
0.308418	0.0623446	-1110
0.292106	-0.0208851	-1112
0.200106	0.0457043	-1110
0.171762	-0.211563	-1114
0.12637	-0.0791897	-1116
0.186672	-0.0864504	-1116
0.229831	-0.180366	-1118
0.293556	-0.0744011	-1118
0.300153	0.036918	-1122
0.240005	-0.113452	-1124
0.163095	-0.00334784	-1128
0.317979	0.0137939	-1132
0.247587	0.149395	-1128
0.164011	-0.111595	-1134
0.266762	-0.0439668	-1140
0.288825	0.0440728	-1140
0.311095	0.00271923	-1140
0.337894	-0.0783492	-1140
0.260772	-0.153139	-1140
0.262513	0.0231735	-1140
0.255317	-0.103931	-1144
0.220101	0.0509733	-1114
0.224772	0.165852	-1136
0.266254	0.161607	-1120
0.284005	0.140962	-1112
0.196619	0.145666	-1106
0.268577	-0.00464742	-1130
0.194116	0.199189	-1124
0.181132	0.260375	-1106
0.234735	0.294836	-1114
0.225513	0.195947	-1140
0.222466	0.137678	-1118
0.170963	-0.00460504	-1116
0.282619	-0.255255	-1116
0.193852	-0.234426	-1138
-0.118384	-0.17042	-616
-0.0379425	-0.138428	-614
-0.0707302	-0.0873844	-614
-0.132759	-0.153116	-608
-0.231398	-0.0821663	-602
-0.107376	-0.0488285	-602
-0.0566977	0.0130675	-602
-0.0629176	-0.042042	-598
-0.10281	-0.0873026	-596
-0.107984	-0.108049	-590
0.00810398	0.0394999	-596
0.0856972	0.0689947	-598
0.0898472	0.0620745	-582
0.284368	-0.154543	-578
0.215944	-0.0981254	-578
0.272265	-0.116181	-584
0.17266	-0.0707861	-590
0.283418	-0.0780558	-594
0.291055	-0.11285	-600
0.296898	-0.0391877	-600
0.247018	-0.0794086	-600
0.215481	-0.104466	-616
0.264492	-0.0701989	-616
0.287578	-0.0112315	-614
0.330912	-0.0143683	-586
0.316829	0.0151562	-582
0.248053	0.0421164	-592
0.292708	0.0381025	-600
0.248264	0.0177133	-602
0.247717	0.0610858	-582
0.280263	0.0792451	-580
0.249972	0.143289	-586
0.228042	0.10738	-586
0.251208	0.176493	-588
0.267019	0.136376	-604
0.241934	0.131062	-604
0.244084	0.119228	-604
0.0849235	0.159226	-608
0.191501	0.168904	-610
0.194315	0.163842	-618
0.153559	0.18047	-590
0.207307	0.196541	-592
0.184688	0.198897	-594
0.112953	0.0951149	-580
0.185718	0.0726816	-578
0.180172	-0.00851099	-578
0.193084	0.0152157	-582
0.185321	0.115868	-578
0.239643	-0.0147326	-606
0.209101	0.0317471	-618
0.170008	0.0918815	-618
0.129312	0.0675007	-610
0.203745	0.11146	-610
0.141918	0.0385336	-610
0.213422	0.0810439	-606
0.152604	0.0203	-586
0.203418	0.123532	-600
0.19332	0.111215	-598
0.0660477	0.218699	-602
0.0913343	0.241236	-584
0.227575	0.112003	-602
0.275028	-0.31426	-612
0.280685	-0.318861	-582
-0.231398	-0.0821663	-602
0.226982	-0.353149	-136
-0.180966	0.0324752	-134
-0.28635	0.0276323	-126
-0.27409	0.0766714	-96
-0.113537	-0.122164	-94
-0.149639	-0.10639	-120
-0.10269	-0.116351	-128
-0.169512	-0.186368	-118
-0.137399	-0.22536	-110
-0.0937203	-0.143382	-102
-0.0898479	-0.117648	-118
-0.103792	-0.125487	-116
-0.194512	-0.186857	-106
0.261793	-0.264662	-136
0.219247	-0.208307	-134
0.229589	-0.261365	-132
0.305488	-0.222149	-136
0.317498	-0.0706607	-114
0.219518	-0.14163	-92
0.270462	-0.0740267	-92
0.256283	-0.0481805	-92
0.299886	-0.126423	-94
0.247849	-0.126088	-102
0.285289	-0.0496831	-114
0.265049	-0.0342183	-110
0.221436	-0.00947123	-122
0.236329	-0.139132	-130
0.228936	-0.108777	-130
0.188145	-0.107472	-136
0.216033	-0.0193976	-136
0.182512	-0.0396881	-104
0.160869	-0.0190111	-112
0.165609	-0.101693	-112
0.183155	-0.132846	-114
0.124251	-0.0735716	-114
0.119011	-0.060056	-120
0.145823	-0.037301	-124
0.166221	-0.0292552	-130
0.109419	-0.00544402	-136
0.0874958	0.154682	-136
0.00885213	-0.0305604	-130
0.0825059	0.0407615	-128
0.0999806	0.0107335	-128
0.0680568	0.0875165	-124
0.117751	0.159302	-124
0.162466	0.117467	-120
0.195558	0.153205	-118
0.178339	0.00953133	-118
0.072562	0.102286	-116
0.0953377	0.0414227	-102
0.141109	0.028989	-98
0.170063	0.0688059	-96
0.150593	-0.0011678	-96
0.1322	0.112547	-94
0.188839	0.0520703	-94
0.227681	0.0661354	-94
0.211517	0.0840045	-94
0.281151	0.136496	-94
0.19666	0.0324237	-98
0.228252	0.0979752	-98
0.284263	0.171023	-104
0.000678578	-0.0548696	-104
0.0992816	0.218912	-98
0.331595	0.0683508	-130
0.227502	0.0370692	-94
0.296559	0.0444109	-94
0.22816	0.0487644	-100
0.219676	0.0679301	-100
0.247783	0.0176115	-106
0.290835	0.067226	-110
0.242115	0.133894	-112
0.263717	0.103608	-114
0.196135	-0.010682	-132
0.103338	0.00536674	-112
0.141211	0.0526542	-106
0.154782	0.125084	-106
0.0681487	0.0830772	-100
0.282309	-0.0358842	-110
0.260171	-0.0419035	-108
0.180589	-0.0846056	-114
0.167532	0.0344674	-80
0.113358	0.131326	-118
0.109379	0.0109224	-108
0.119756	0.0190369	-98
0.1709	-0.0112745	-112
0.111705	0.0169761	-112
0.272156	0.0505332	-84
0.217262	0.044222	-118
0.244844	0.0328616	-112
0.233737	0.0600903	-92
0.239079	-0.0828968	-96
0.272054	-0.369395	-94
0.0829963	0.345289	326
-0.303083	0.158442	294
-0.0590493	-0.179622	300
-0.0839068	-0.163935	300
-0.121724	-0.190556	318
0.0522958	-0.0248364	314
0.0558206	0.00438246	316
-0.191872	-0.20542	330
-0.158083	-0.232922	324
-0.141906	-0.216191	328
-0.146185	-0.149485	330
-0.064004	-0.115276	308
-0.152815	-0.137307	312
-0.124137	-0.223032	306
0.0700034	0.00496728	300
0.235504	0.174121	332
0.285169	0.124856	326
0.116914	0.115935	330
0.0845492	0.0861464	330
0.173841	0.125944	332
0.16644	0.130756	332
0.166339	0.058682	324
0.216384	0.0910619	324
0.190403	0.0973764	316
0.229745	0.138788	316
0.256279	0.167237	316
0.154139	0.183345	316
0.108938	0.175965	316
0.112267	0.0773371	314
0.143548	0.0467709	308
0.278879	0.144525	300
0.230957	0.118748	298
0.264211	0.113648	298
0.0839962	0.0959181	320
0.230488	0.0828077	314
0.302056	0.149218	304
0.171489	0.0696011	302
0.281415	-0.0918984	294
0.175506	-0.0321726	294
0.313987	0.0257766	294
0.324824	0.0373767	296
0.272757	-0.0505315	296
0.243397	-0.0523526	296
0.241476	-0.108829	294
0.271741	-0.0241109	298
0.21077	-0.256811	300
0.287432	0.0157976	300
0.245403	0.0309659	302
0.292839	-0.0443946	304
0.144973	-0.0449572	306
0.195866	-0.0327574	312
0.201866	0.0105564	312
0.318411	0.0482885	314
0.355687	0.0854431	316
0.305452	0.062983	312
0.355888	0.051864	316
0.258602	0.0449794	316
0.32169	-0.0837849	320
0.243403	-0.141208	322
0.276343	-0.12376	324
0.295107	-0.0330091	324
0.214535	0.0432916	324
0.185382	0.198499	320
0.213188	0.0714074	302
0.225148	0.0454162	296
0.204776	0.0862871	298
0.243079	0.0894258	304
0.22636	0.0746869	320
0.100983	0.168443	302
0.159306	0.0299147	314
0.339493	0.0292263	320
0.191783	0.00334607	296
0.279879	-0.0890039	294
0.268936	-0.0768781	320
0.262948	-0.0607696	316
0.244934	0.0225785	318
0.221741	-0.0516567	308
0.266741	-0.154926	302
0.226148	-0.141423	332
0.166607	-0.199047	334
0.248235	-0.16352	330
0.260781	-0.00785437	320
0.198118	-0.260134	328
0.230589	-0.214992	298
0.202257	-0.269832	304
0.0815328	0.298333	314
0.0671377	0.00912025	298
0.178958	0.0175817	316
0.176673	-0.000984573	296
0.214015	0.00308697	304
0.218629	-0.105653	324
0.228349	-0.155851	322
0.27245	-0.200808	298
0.265484	-0.301412	302
0.23379	-0.314641	298
0.260546	-0.281573	312
-0.108262	0.0244888	800
-0.162593	0.0751936	796
-0.233096	0.246513	790
-0.0933162	-0.0557621	796
-0.119561	-0.00984382	786
-0.077073	0.0218101	780
0.0471453	0.012603	780
0.0873139	0.230382	812
0.162037	0.101834	812
0.220165	0.146655	808
0.210002	0.143581	808
0.193639	0.117826	808
0.229013	0.131563	804
0.195062	0.193056	798
0.179022	0.0555645	794
0.0628684	0.143251	790
0.0801997	0.209406	790
0.208143	0.0993677	786
0.332546	0.105515	784
0.0700006	0.146933	788
0.0772523	0.258303	782
0.155635	0.10684	790
0.141047	0.261311	788
0.206965	0.224395	782
0.283888	-0.146516	812
0.424804	-0.0475577	810
0.271166	-0.227725	810
0.222855	-0.022842	810
0.391672	0.0241521	808
0.293681	-0.0471039	804
0.354032	0.00109782	800
0.296527	0.0456329	798
0.238106	-0.0121346	796
0.280265	-0.105984	792
0.252048	-0.107923	788
0.3044	-0.0118858	782
0.332128	-0.0136496	776
0.278926	0.0342228	790
0.0562205	-0.053947	786
-0.0454236	-0.080368	784
0.407359	-0.123805	786
0.202858	-0.204019	804
0.325988	-0.208543	804
0.208534	0.107106	1294
0.158456	0.104282	1308
-0.0946397	-0.070012	1308
-0.123116	-0.0166466	1308
-0.0256162	0.0788945	1320
-0.125342	-0.0639819	1328
0.10521	0.0450704	1332
0.274897	-0.0673791	1332
0.233545	-0.193687	1328
0.173877	0.0174181	1326
0.218294	-0.0213532	1324
0.30226	-0.0131786	1322
0.30578	-0.185264	1322
0.355936	-0.149381	1322
0.332346	-0.16384	1320
0.217587	-0.171923	1310
0.235674	0.0413617	1312
0.100705	0.142112	1322
0.234755	0.15803	1318
0.222763	0.181506	1308
0.269103	-0.154066	1312
0.307763	-0.16934	1304
0.33526	-0.109753	1302
0.318751	-0.0481209	1328
0.306076	0.0450775	1304
-0.186764	-0.147866	1298
0.259595	-0.153477	1754
-0.217876	-0.0388062	1748
-0.180022	-0.156451	1746
-0.120443	-0.0533475	1774
-0.0752461	-0.0690672	1772
0.277993	-0.164395	1766
0.217274	0.101164	1744
0.120329	0.204757	1748
0.209167	-0.0519581	-3034
0.0161705	-0.0876702	-3062
0.411332	0.101572	-3054
0.322827	-0.140604	-3058
0.0828626	0.149352	-2540
0.271347	-0.00935438	-2536
0.238335	-0.0422362	-2518
0.18642	0.0993773	-2526
0.187829	0.0878966	-2526
0.334152	-0.0399216	-2036
-0.194627	-0.186784	-1544
-0.06245	-0.15869	-1546
0.19296	0.188755	-1534
0.116022	0.14352	-1536
0.0831569	0.205433	-1538
0.196426	0.192251	-1540
0.045143	0.0278353	-1534
0.149818	-0.0250348	-1544
0.170635	-0.127246	-1126
0.082709	0.0550698	-1124
0.0946825	0.18892	-1118
0.202635	-0.0456761	-1110
0.109847	0.215992	-1110
-0.155995	-0.151684	-1120
0.156834	-0.0349582	-596
0.161683	-0.0780929	-612
0.251555	0.120261	-580
0.281524	-0.109439	-616
0.207377	0.18015	-596
0.0931631	0.185398	-580
0.172545	0.115564	-602
0.329495	-0.0380281	-614
0.206232	0.0349062	-616
0.250862	0.00443761	-590
0.300523	-0.250468	-134
0.249809	-0.00860396	-106
0.0373167	0.180486	-98
-0.0776896	-0.135912	-128
-0.14368	-0.151325	-130
0.273722	0.0542341	-98
0.215482	-0.0106219	-98
0.215982	0.0597984	-116
0.257416	0.0735287	-106
0.125695	0.04393	-96
0.115195	0.0444023	-94
0.164267	0.065251	-104
0.279907	0.114625	328
0.208133	0.0968731	328
0.128259	0.0381614	332
0.0784996	0.1198	322
0.274802	0.141334	312
0.34542	-0.015272	304
0.267233	0.0273608	320
0.162909	-0.010127	318
-0.10105	-0.165038	326
-0.207449	-0.189375	782
0.134411	0.0443667	784
0.283416	0.051261	774
-0.147982	-0.0770672	790
0.0964907	0.223641	808
0.184163	0.0562744	800
0.224194	0.00954374	782
-0.186123	-0.144801	1300
0.26051	0.0139076	1316
0.288612	0.0592399	1304
-0.161776	-0.175682	1780
0.227905	-0.131577	1780

## Sheet: Sheet2
0.290921	-0.345979	-126
0.354447	-0.36256	-132
0.307422	-0.329612	-132
0.289993	-0.193993	-98
0.282707	-0.138118	-94
0.27221	-0.244433	332
0.342738	-0.183775	330
0.333968	-0.235846	328
