# Supplementary material for: Spinal premotor interneurons controlling antagonistic muscles are spatially intermingled
Source: eLife. 2022 Dec 13;11:e81976. doi: 10.7554/eLife.81976 (PMC9844990; doi:10.7554/eLife.81976)
Supplement: Figure 12—figure supplement 4—source data 7. [file elife-81976-fig12-figsupp4-data7.xlsx]

## Sheet: Sheet1
-0.0649541	-0.135433	-4012
-0.193558	-0.0808744	-4024
-0.107368	-0.0743507	-4040
0.0125221	0.0581564	-4010
0.164415	0.0984477	-4016
0.270688	0.0996057	-4026
-0.0884681	-0.1236	-3532
-0.0811572	-0.0672436	-3558
0.125081	0.00850113	-3538
0.182633	-0.0475757	-3542
-0.181045	-0.171512	-3052
-0.215182	-0.00366966	-3066
0.193223	-0.0078686	-3068
0.226387	-0.00553095	-3064
-0.225659	-0.0311127	-3068
-0.160174	0.16465	-3074
-0.0892436	-0.111351	-3076
-0.0962823	-0.15941	-3080
-0.183466	-0.0760661	-3082
-0.175102	-0.0109296	-3080
0.256786	0.0464618	-3052
0.25219	0.120587	-3054
0.249495	-0.0169986	-3062
0.289866	-0.000740989	-3074
-0.0993767	-0.157483	-2576
-0.129437	-0.148267	-2580
-0.158908	-0.0365941	-2580
-0.142279	-0.15088	-2588
0.191555	0.204303	-2570
0.151113	0.166742	-2572
0.160021	0.102413	-2574
0.00634366	0.0869599	-2576
0.229654	0.26615	-2580
0.107651	0.158049	-2582
0.219648	0.137761	-2580
0.241855	0.167544	-2596
0.114576	0.0965767	-2598
0.134926	-0.00710801	-2590
0.114621	-0.041176	-2582
0.170115	0.000470383	-2574
0.239453	-0.0553397	-2572
-0.0773032	-0.0950194	-2094
-0.160082	-0.136513	-2096
-0.17592	-0.0774322	-2100
-0.0927417	-0.0828711	-2110
-0.162501	-0.0194224	-2104
-0.152986	-0.15518	-2112
-0.226139	-0.101613	-2114
-0.0306806	-0.0499136	-2116
0.0168013	-0.0200867	-2116
-0.0309876	0.0333892	-2120
-0.0745592	-0.100076	-2118
0.186852	0.0234165	-2098
0.214844	-0.0189159	-2100
0.22493	-0.0445993	-2104
0.055677	0.13462	-2094
0.0482063	0.0320108	-2102
0.0521227	0.0518318	-2106
0.0106689	0.0930764	-2110
0.142777	0.119889	-2106
0.180523	0.0729648	-2114
0.133103	0.144402	-2118
0.249859	0.0991298	-2118
0.204746	-0.0377072	-2122
0.239202	-0.00252433	-2124
0.0672666	0.0655828	-2130
0.172052	-0.172883	-2128
0.247152	-0.228668	-2118
0.26046	-0.114384	-2108
0.28162	-0.188802	-2096
0.311404	0.0751403	-2094
0.29281	0.0861345	-2100
0.290533	0.0301259	-2128
0.311963	0.0834524	-2108
0.25407	0.192812	-2088
0.278827	0.224782	-2090
0.287783	0.125951	-2092
0.211278	0.204197	-2094
0.146209	0.281654	-2098
0.101557	0.310227	-2100
0.152906	0.197172	-2098
0.224046	0.24672	-2106
0.0629205	0.220048	-2116
0.0862103	0.247534	-2118
0.274444	0.152979	-2118
0.122397	0.205841	-2126
-0.109575	-0.11102	-1608
-0.231379	-0.222621	-1608
-0.087105	0.038682	-1610
-0.0292618	0.0131848	-1612
-0.182003	-0.132911	-1614
-0.128289	-0.11426	-1618
-0.173756	0.000780951	-1620
-0.250394	0.0160261	-1628
-0.156463	-0.166143	-1628
0.279062	0.194781	-1610
0.173196	0.14465	-1612
0.216261	0.124354	-1614
0.244529	0.107846	-1618
0.168606	0.171244	-1622
0.207902	0.106417	-1626
0.293686	0.226301	-1632
0.253336	0.19459	-1636
0.0595578	0.227307	-1636
0.162661	0.099347	-1632
0.118182	0.094005	-1634
0.21809	0.0694964	-1640
0.126501	0.0645448	-1642
0.250467	0.269594	-1636
0.192103	0.00549158	-1608
0.129483	-0.0403769	-1610
0.294273	-0.0737418	-1608
0.261108	0.0389479	-1624
0.182029	0.0374524	-1634
0.316703	-0.0864447	-1626
-0.198184	0.232524	-1144
-0.126816	-0.0648756	-1138
-0.222479	-0.0697589	-1136
-0.112795	-0.0984261	-1138
-0.0990518	-0.144577	-1144
-0.121644	-0.0780925	-1146
-0.191782	-0.0620657	-1150
-0.0399946	-0.00307407	-1148
-0.0834512	-0.1251	-1156
-0.0576121	-0.0620177	-1162
-0.188597	-0.0361843	-1160
-0.200176	4.80323e-05	-1154
-0.195349	-0.0305085	-1154
-0.232951	-0.0375372	-1164
-0.11836	-0.0688062	-1164
-0.148719	-0.123419	-1166
0.304067	0.0687582	-1168
0.254019	0.119	-1166
0.187865	0.164559	-1166
0.122517	0.171459	-1164
0.267473	0.136492	-1162
0.316077	0.089292	-1160
0.250716	0.103622	-1160
0.205021	0.11238	-1158
0.149125	0.242779	-1154
0.170764	0.122947	-1148
0.315628	0.0527074	-1146
0.271089	0.0190928	-1148
0.322595	0.0544286	-1150
0.1182	0.146186	-1146
0.142515	0.131424	-1144
0.153054	0.17607	-1142
0.246842	0.19373	-1138
0.278806	0.228113	-1138
0.193953	0.105959	-1136
0.280245	0.0254971	-1136
0.194316	0.227593	-1142
0.124227	0.0761792	-1142
0.0702918	0.143825	-1138
0.183825	0.118552	-1134
0.190558	0.200623	-1128
0.102046	0.151798	-1134
0.316562	0.02978	-1138
0.287114	0.11603	-1140
0.269865	0.13445	-1142
0.244733	0.161268	-1144
0.272128	0.212599	-1146
0.0528526	0.177479	-1146
0.220573	0.167753	-1130
0.295458	-0.00301803	-1164
0.159259	-0.100011	-1132
0.254873	0.00382657	-1136
0.199469	-0.0403471	-1142
0.0752727	0.0588235	-1144
0.175788	-0.000496334	-1152
0.133684	0.0374732	-1158
0.251411	-0.00321816	-1156
0.245299	-0.0771639	-1156
0.0576613	0.0468075	-1160
0.108368	0.0390182	-1162
0.0449201	0.028315	-1166
0.037744	0.0145618	-1170
0.272534	-0.0599043	-1136
0.273702	-0.0292837	-1134
0.324341	-0.0574066	-1144
0.300925	-0.0177799	-1144
0.29742	-0.0574466	-1142
0.272534	-0.0232156	-1166
0.319385	-0.0481043	-1166
0.33049	-0.0421964	-1170
0.317202	-0.0633145	-1152
0.243036	-0.21163	-1160
0.182675	-0.175574	-1158
0.268328	-0.198662	-1166
0.261533	-0.200367	-1134
-0.146255	-0.150224	-650
-0.183916	-0.0829017	-652
-0.123871	-0.10372	-652
-0.151616	-0.0819992	-652
-0.0582447	-0.0643357	-652
-0.114957	-0.0784395	-656
-0.0992845	-0.134905	-660
-0.113174	-0.206824	-660
-0.121745	-0.182556	-662
-0.0879001	-0.179232	-664
-0.150427	-0.227119	-666
-0.166962	-0.218971	-668
-0.133968	-0.16248	-666
-0.0847073	-0.135563	-666
-0.102646	-0.221763	-656
-0.157745	-0.0806495	-664
-0.102734	-0.243492	-668
-0.041506	-0.116297	-680
-0.0970589	-0.222168	-684
-0.193075	-0.216879	-684
-0.208666	0.195437	-650
0.377597	0.280936	-650
0.274129	0.259452	-652
0.237919	0.289363	-652
0.121389	0.221679	-652
0.089916	0.216626	-650
0.105472	0.203931	-654
0.174093	0.181038	-656
0.120643	0.271683	-662
0.190931	0.196879	-664
0.166583	0.117115	-650
0.149099	0.0834247	-652
0.242569	0.159064	-656
0.119758	0.114281	-660
0.144927	0.148806	-660
0.199309	0.0807592	-660
0.279326	0.0654154	-662
0.270803	0.0643863	-662
0.261603	0.0694137	-660
0.0755835	0.19779	-666
0.214894	0.120666	-666
0.215698	0.141189	-664
0.229046	0.153876	-672
0.203527	0.217731	-674
0.285782	0.149802	-670
0.155228	0.231809	-672
0.0875797	0.173876	-674
0.210163	0.0653648	-676
0.183357	0.135352	-680
0.151895	0.165272	-684
0.18077	0.0848587	-680
0.180257	0.121392	-678
0.227689	0.176162	-678
0.239405	0.147507	-678
0.247195	0.212585	-682
0.247463	0.0989793	-684
0.231767	0.0537073	-672
0.0456018	0.120523	-684
0.310194	0.0463349	-666
0.188583	-0.129152	-654
0.232641	-0.107634	-656
0.180619	-0.0447997	-660
0.268752	-0.219857	-656
0.322644	-0.230679	-650
0.248389	-0.190612	-652
0.34839	-0.114711	-654
0.298017	-0.123113	-672
0.315117	0.00097849	-672
0.282781	-0.0143737	-674
0.159493	0.0262252	-674
0.122432	0.0235006	-672
0.166379	-0.0421426	-676
0.343822	-0.0721636	-678
0.316509	-0.00976803	-682
0.353902	-0.0731253	-680
0.353092	-0.120869	-676
0.252397	-0.0549135	-676
0.181376	-0.0798229	-680
0.283241	-0.037326	-666
0.0384938	0.0235175	-652
0.160238	0.0423113	-662
0.232635	-0.250966	-648
0.217988	-0.272341	-648
0.192883	-0.237073	-654
0.145667	-0.272062	-656
0.257035	-0.293167	-658
0.251372	-0.262235	-676
0.161468	-0.206554	-652
-0.0529122	-0.11993	-180
-0.112469	-0.142946	-176
-0.101338	-0.0874528	-180
-0.167172	-0.124422	-182
-0.0927213	-0.100395	-186
-0.236318	-0.0816754	-188
-0.109411	-0.188451	-188
-0.0961921	-0.127636	-200
-0.132481	-0.14663	-202
-0.115556	-0.0605647	-204
-0.000351467	-0.0726839	-208
-0.14576	-0.129376	-212
0.0166178	-0.0457489	-176
-0.0863675	0.0248969	-176
-0.175453	0.0545992	-184
-0.0976364	-0.0167835	-206
-0.228344	0.0241444	-210
-0.190187	0.173769	-202
0.190627	-0.00623207	-172
0.187299	-0.0432404	-174
0.194235	-0.0480144	-174
0.0654607	0.00188138	-172
0.123189	-0.091192	-174
0.0652026	0.0503739	-176
0.17028	0.000117586	-180
0.191538	-0.0320697	-184
0.126918	0.00675729	-186
0.143437	0.0383645	-188
0.134947	0.0326106	-188
0.0920129	0.0587069	-192
0.176524	0.0262923	-192
0.104199	-0.0991957	-194
0.134969	0.00261825	-200
0.139703	-0.0538388	-204
0.185981	-0.0719549	-208
0.183444	0.0352367	-208
0.0495788	0.0197231	-206
0.0138061	0.0356208	-200
0.0592002	0.00282991	-210
0.110701	-0.125347	-206
0.123321	0.0380195	-196
0.142794	-0.00151294	-202
0.179407	0.0515028	-200
0.0404352	-0.00645156	-184
0.047135	-0.00261825	-180
0.279059	-0.284755	-172
0.297368	-0.199371	-176
0.261486	-0.1861	-176
0.298296	-0.26765	-178
0.217514	-0.286926	-180
0.278197	-0.305575	-180
0.192401	-0.247825	-182
0.193806	-0.177877	-182
0.25047	-0.281047	-190
0.23177	-0.239021	-192
0.215696	-0.197827	-192
0.212808	-0.236552	-198
0.265649	-0.300174	-196
0.267961	-0.266866	-202
0.222479	-0.292335	-200
0.330329	-0.195993	-210
0.225922	-0.219463	-194
0.0644612	-0.15334	-204
0.270811	-0.0858066	-170
0.206069	0.0335669	-174
0.24143	0.0342176	-178
0.214082	-0.0548265	-178
0.276011	-0.0433893	-180
0.340873	-0.0420959	-182
0.291069	-0.0332063	-182
0.359106	-0.0806014	-188
0.316979	0.0119311	-188
0.263002	0.00228901	-188
0.294639	-0.0514244	-186
0.225301	0.0577897	-194
0.21613	0.00879545	-196
0.234807	-0.0697365	-202
0.206514	-0.00376276	-198
0.259432	0.0246853	-196
0.280564	0.0271075	-202
0.262183	-0.0183199	-204
0.243572	-0.0335826	-206
0.347804	-0.0722528	-204
0.33475	0.0355502	-198
0.229277	0.054513	-200
0.217789	0.0252262	-206
0.206728	-0.0148159	-212
0.268246	-0.0117351	-212
0.32179	0.0200053	-208
0.279905	0.0638493	-210
0.279932	0.0862534	-174
0.190989	0.103397	-176
0.172773	0.184454	-174
0.287544	0.17964	-178
0.221885	0.192834	-182
0.261519	0.112475	-180
0.227531	0.114419	-180
0.312531	0.0766662	-182
0.296704	0.0736482	-178
0.159577	0.0824201	-178
0.214461	0.158929	-182
0.251716	0.150009	-184
0.140878	0.183074	-182
0.200759	0.116708	-180
0.174641	0.173824	-194
0.18675	0.172515	-196
0.220035	0.175219	-198
0.24941	0.119765	-202
0.216811	0.128028	-202
0.261684	0.204859	-198
0.282837	0.250749	-198
0.222303	0.263283	-200
0.141389	0.122595	-206
0.282019	0.0915683	-210
0.23031	0.133695	-194
0.259668	0.095527	-194
0.28622	0.0769562	-192
0.15861	0.132927	-192
0.0626215	0.0699951	-174
0.0658836	0.0992819	-178
0.0794809	0.207046	-180
0.161625	0.0678002	-188
0.081425	0.164887	-204
0.125798	0.0677453	-174
-0.10422	-0.17405	308
-0.124791	-0.127237	306
-0.141877	-0.240997	302
-0.0567879	-0.145215	304
-0.12444	-0.153381	306
-0.170415	-0.160038	302
-0.150066	-0.135055	296
-0.174525	-0.0352642	298
-0.167674	-0.181397	294
-0.115146	-0.175246	294
-0.237293	-0.137048	286
-0.135035	-0.130142	288
-0.181615	-0.230438	294
-0.0801165	-0.169208	286
-0.0513404	-0.129793	286
-0.0419791	-0.104269	286
0.00113596	-0.0791647	288
-0.0757792	-0.023602	288
-0.125627	-0.148796	280
-0.160347	-0.158308	284
-0.118672	-0.13445	284
-0.111872	-0.129131	284
-0.100745	-0.141876	282
-0.220522	0.0125308	280
-0.176038	0.0859641	284
-0.227668	0.176264	286
-0.181088	0.0467911	298
-0.199413	0.0846541	300
0.232909	0.125322	310
0.296921	0.152869	314
0.191642	0.235857	314
0.292361	0.138387	312
0.272637	0.113567	308
0.257957	0.202835	308
0.223615	0.11413	304
0.18271	0.107558	304
0.16977	0.213764	304
0.362373	0.0968004	302
0.315029	0.104568	300
0.186649	0.0847822	300
0.258623	0.255984	300
0.237153	0.150455	298
0.247883	0.16552	296
0.324111	0.169572	294
0.25254	0.205854	294
0.178713	0.17301	290
0.185173	0.0766372	288
0.276767	0.229741	280
0.248033	0.195402	278
0.222215	0.155546	278
0.226114	0.169038	282
0.21462	0.185698	280
0.319733	0.178094	280
0.28694	0.0776197	280
0.176581	0.111246	280
0.236652	0.0743161	304
0.247516	0.0675808	306
0.195711	0.19128	296
0.344409	0.122816	296
0.258799	0.215216	284
0.21919	0.100837	282
0.194224	0.0612656	288
0.203131	0.0740954	296
0.159164	0.141278	280
0.0949563	0.0773349	280
0.0817017	0.107395	280
0.122421	0.0913538	276
0.0988083	0.165634	276
0.0519291	0.208823	280
0.0911767	0.0990146	284
0.119808	0.111061	286
0.130925	0.140964	290
0.0988754	0.0447193	294
0.235114	0.05772	296
0.106657	0.106248	308
0.0974658	0.173708	310
0.133367	0.226893	310
0.134612	0.0973842	298
0.107245	0.136322	294
0.126056	0.162074	292
0.142925	0.2534	294
0.106884	0.179838	292
0.141386	0.1805	282
0.139269	0.0648041	278
0.175093	0.00833013	308
0.241868	0.041615	306
0.209906	-0.0138978	304
0.196775	-0.000633659	302
0.228205	-0.039593	300
0.306747	-0.110791	306
0.266379	-0.0193729	296
0.275833	0.0481083	296
0.30244	0.0223632	292
0.28996	0.0448332	292
0.229795	-0.03085	292
0.238093	-0.0242784	288
0.261711	0.0073476	284
0.161544	0.0358267	284
0.193331	-0.0214447	282
0.199217	-0.0394435	280
0.174464	-0.00773919	280
0.175083	0.0274253	280
0.231726	0.0224629	280
0.258014	0.0262292	278
0.258194	0.00155211	276
0.24021	-0.102055	290
0.370025	-0.0654805	284
0.268811	-0.15017	298
0.336875	-0.124211	296
0.398362	-0.321956	312
0.282804	-0.367907	304
0.393906	-0.350421	290
0.347703	-0.321322	290
0.324328	-0.276525	286
0.286821	-0.30489	320
0.227353	-0.308464	290
0.263823	-0.255763	312
-0.0981129	-0.111494	786
-0.134017	-0.130792	786
-0.159888	-0.161187	786
-0.174123	-0.130184	778
-0.140976	-0.0360772	772
-0.114967	-0.132144	772
-0.132781	-0.0411512	762
-0.150207	0.00119597	768
-0.155257	-0.114388	760
-0.150534	-0.158158	762
-0.229904	-0.16481	758
-0.0852616	-0.09664	760
-0.213151	-0.049431	756
-0.198697	-0.122357	756
-0.112113	0.0491763	784
0.109606	0.0777168	788
0.141221	0.00969513	786
-0.0215056	0.0818708	784
-0.0171657	0.099407	780
0.120829	0.0467136	780
0.108519	0.140162	778
0.155385	0.0830526	782
0.0442774	0.138018	770
0.113461	0.140579	770
0.0874622	0.120177	768
0.12789	0.103745	766
0.120762	0.106144	764
0.116764	0.0436847	764
0.0463759	0.0769808	758
0.0682644	0.131415	758
-0.00568785	0.106278	766
-0.00191978	0.117771	760
0.178095	0.194384	788
0.100426	0.245308	782
0.124306	0.156063	784
0.186234	0.16234	782
0.134548	0.181108	778
0.135007	0.154138	776
0.166132	0.161251	768
0.066697	0.154598	768
0.172336	0.222839	758
0.161369	0.167832	760
0.161496	0.150303	758
0.1366	0.181412	756
0.19546	0.179962	754
0.190262	0.105373	758
0.215924	0.152391	756
0.217241	0.191808	758
0.231839	0.234792	756
0.33493	0.16987	766
0.189226	0.120234	766
0.230986	0.238097	766
0.297964	0.187024	778
0.217563	0.209748	776
0.189542	0.141952	776
0.248795	0.148215	780
0.240156	0.104297	778
0.174741	0.129172	784
0.235351	0.139214	786
0.204155	0.171009	786
0.219304	0.175291	782
0.28764	0.126582	788
0.243092	0.221601	786
0.231502	0.0651343	764
0.215684	0.0509738	768
0.262928	0.0382922	788
0.273344	0.0818213	788
0.289907	0.0465508	794
0.250975	0.0117332	794
0.304096	0.0399057	784
0.235694	0.0111317	780
0.111904	-0.152192	786
0.087595	-0.151251	778
0.0306296	-0.0582062	770
0.00185851	-0.0673564	764
0.151994	0.0734212	760
0.200316	0.0326733	762
0.170472	0.0800875	780
0.19159	0.00107566	780
0.266078	-0.123319	784
0.296728	-0.173196	758
0.270959	-0.169148	760
0.302411	-0.0176494	760
0.23071	-0.218947	764
0.318775	-0.0822459	770
0.204048	-0.235323	764
0.218993	-0.23332	772
0.250643	-0.234283	762
0.167633	-0.215041	762
0.177804	-0.210441	762
-0.163079	0.183776	786
-0.112087	0.081793	760
0.338574	0.145385	1248
0.320559	0.200225	1244
0.422569	0.163347	1238
0.258613	0.213263	1250
0.20285	0.145432	1246
0.18114	0.178144	1252
0.199666	0.285057	1250
0.15077	0.197896	1244
0.248539	0.136263	1244
0.203313	0.14698	1236
0.216832	0.256097	1230
0.174078	0.267337	1232
0.176133	0.180129	1232
0.222416	0.128103	1226
0.193572	0.138561	1226
0.170389	0.185577	1218
0.193055	0.192956	1218
0.240288	0.2117	1216
0.227542	0.166388	1250
0.0891207	0.119622	1238
-0.0109411	0.228458	1228
-0.237378	0.217163	1254
0.0749483	0.0972908	1248
0.00286298	0.0597955	1248
0.11933	0.0847455	1246
-0.0803892	0.0684092	1244
0.042915	0.0956728	1242
0.0429685	0.0787972	1244
0.118814	0.0869966	1232
0.0893464	0.0679793	1228
0.0326392	0.0139757	1226
-0.010157	0.0685733	1226
0.0391254	0.075569	1230
0.180617	-0.0438813	1246
0.3406	0.0297258	1236
0.315979	0.060327	1230
0.172557	0.0843	1218
0.282823	-0.0259192	1220
0.271799	-0.177628	1240
0.290022	-0.162472	1240
0.207239	-0.255284	1238
0.213268	-0.197185	1228
0.227464	-0.21184	1224
0.29225	-0.176315	1218
0.300102	-0.240769	1232
-0.14521	-0.102434	1248
-0.220052	-0.148035	1246
-0.139906	-0.136834	1240
-0.195104	-0.1633	1236
-0.21176	-0.123929	1232
-0.174333	-0.140125	1232
-0.181758	-0.169194	1222
-0.259468	-0.166708	1222
-0.298487	-0.119177	1226
-0.185458	-0.159736	1226
-0.132493	-0.163347	1222
-0.186616	-0.0221908	1242
-0.121753	-0.0977838	1726
-0.272611	-0.137823	1726
-0.0908976	-0.0651268	1734
-0.19323	-0.144604	1736
-0.246961	-0.143402	1738
-0.214723	-0.101935	1744
-0.0980618	0.0661959	1740
-0.0749267	-0.123691	1744
-0.0802398	0.00922357	1728
-0.081118	-0.0935076	1722
-0.308116	0.234132	1738
-0.167397	0.205205	1732
0.186578	-0.222708	1740
0.243651	-0.249661	1736
0.219935	-0.256941	1740
0.247113	-0.240008	1728
0.306144	0.0770425	1750
0.330177	0.0782911	1746
0.309644	-0.101366	1744
0.354967	0.0298556	1750
0.250379	-0.113063	1740
0.125341	0.0358096	1736
0.184809	0.0622864	1734
0.252293	0.0593679	1728
0.186944	-0.00141241	1728
0.368215	-0.112915	1726
0.337366	-0.0388919	1720
0.19745	0.0595084	1724
0.0705802	0.119126	1752
0.171226	0.226274	1752
0.195125	0.147881	1748
0.207085	0.198127	1740
0.150959	0.153617	1738
0.163986	0.198517	1738
0.0508188	0.0817323	1736
0.129479	0.13478	1722
0.0645279	0.0949122	1724
0.101101	0.28121	1740
0.146328	0.212329	1738
0.148729	-0.00182912	2226
0.11034	0.0773311	2206
0.204476	0.169214	2198
0.309451	-0.116129	2198
0.243351	-0.0511137	2206
0.153063	-0.174925	2212
-0.148433	-0.178319	2222
-0.234304	-0.293696	2198
0.285654	-0.0318202	2666
0.253487	0.150293	2666
0.258419	0.0374623	2670
0.19181	0.155185	2670
-0.0429778	0.149741	2672
0.0572032	0.178286	2680
0.198224	0.0310903	2680
0.346142	-0.119962	2678
0.393155	-0.262187	2678
0.362919	-0.234322	2674
-0.287223	-0.239688	2702
-0.266937	-0.0608589	2680
-0.253056	-0.234933	2680
-0.163324	-0.182685	2664
-0.18555	-0.0496932	2660
-0.262454	-0.0381133	2658
-0.296043	0.0609773	2654
-0.230873	0.170188	2674
-0.0103802	0.274122	2660
0.247914	0.178032	-4032
0.218567	0.139915	-3082
0.280407	0.181728	-3050
0.299378	-0.0542157	-3058
-0.145447	-0.12622	-2564
0.237346	0.0862631	-2574
0.272991	-0.0142422	-2600
0.204225	-0.0151709	-2090
0.194636	0.147964	-2090
0.23547	0.184974	-2118
-0.235609	0.174052	-1638
0.200096	0.22469	-1640
0.221719	-0.00240101	-1632
-0.126194	-0.134835	-1148
-0.126717	-0.140318	-1168
0.113392	0.202064	-1138
0.164406	0.0338548	-1146
0.194931	-0.0289154	-1160
-0.117189	-0.193564	-664
-0.165511	-0.123762	-684
0.205153	0.193016	-676
0.311149	-0.0316997	-670
0.273826	-0.103661	-680
0.238531	-0.307676	-674
-0.0366239	-0.115924	-178
-0.1595	-0.11079	-200
-0.143871	-0.16259	-200
0.0101047	-0.0470893	-196
0.11907	0.0386467	-172
0.27488	0.0719	-208
0.228657	0.165593	-204
0.189572	0.127989	-206
0.235153	0.197506	-206
0.219326	0.18951	-200
0.109059	0.146191	-184
0.239121	0.182814	306
0.259986	0.128505	296
0.222778	0.107444	300
0.203141	0.166802	282
0.144567	0.129259	310
0.154961	0.077399	278
0.284043	-0.011	302
-0.0117689	0.0841071	768
0.310116	0.130403	758
0.230302	0.028675	772
0.327353	-0.125322	790
0.10381	0.0576147	1232
0.227185	-0.167365	1228
-0.174113	-0.157313	1220
-0.210973	-0.260802	2202

## Sheet: Sheet2
0.286739	-0.102318	-2112
0.308581	-0.065317	-2098
0.283026	-0.0229764	-2116
0.274258	-0.0527724	-1624
0.282082	-0.121721	-648
0.312233	-0.201206	-676
0.280288	-0.203096	-680
0.248144	-0.177663	-680
0.302212	-0.168545	-678
0.34934	-0.0590086	274
0.310351	-0.045417	290
0.359078	-0.209898	312
0.393989	-0.206943	302
0.326425	-0.132577	282
0.353874	-0.195238	280
0.4163	-0.17897	290
0.339209	-0.226159	300
0.332208	0.0195389	786
0.327343	-0.137699	774
0.37331	-0.15745	774
0.359519	-0.119363	768
0.368791	-0.143276	758
0.371513	-0.162935	758
0.38128	-0.189274	784
0.278553	-0.229279	1248
0.254419	-0.238143	1248
0.263673	-0.246475	1246
0.262444	-0.246881	1224
0.253997	-0.282102	1226
0.265331	-0.285111	1228
0.243508	-0.273629	1236
0.257152	-0.230983	1238
0.231397	-0.272824	1230
0.182421	-0.222825	1740
