# Supplementary material for: Spinal premotor interneurons controlling antagonistic muscles are spatially intermingled
Source: eLife. 2022 Dec 13;11:e81976. doi: 10.7554/eLife.81976 (PMC9844990; doi:10.7554/eLife.81976)
Supplement: Figure 12—figure supplement 4—source data 8. [file elife-81976-fig12-figsupp4-data8.xlsx]

## Sheet: Sheet1
0.212091	-0.146255	-4030
0.218386	0.00169251	-4046
0.170878	0.0952639	-3102
0.211179	0.109166	-2606
0.0941824	0.182192	-2146
0.316701	0.0690556	-2154
0.118688	0.0708681	-2156
0.21208	0.164342	-2130
0.206153	0.180372	-2124
-0.0540884	-0.0728517	-1638
0.16044	0.0634647	-1624
0.246073	0.176574	-1628
0.169722	0.132184	-1630
0.0932728	0.0980569	-1650
0.0846844	0.0252814	-1162
0.141491	0.107094	-1172
0.248204	0.153573	-1162
0.293804	0.244379	-1154
-0.000257444	-0.0673202	-678
-0.154225	-0.224953	-710
0.174901	0.23439	-670
0.253717	0.16197	-692
0.283618	0.189226	-694
0.342744	0.16971	-694
0.32519	0.0209213	-700
0.220726	0.105053	-696
0.0883034	0.128768	-690
0.30659	-0.00863329	-692
0.215776	0.152914	-690
0.204497	-0.000869014	-680
0.0779788	0.107262	-680
0.123766	0.0642502	-690
0.202421	-0.206687	-688
0.230627	-0.0150656	-698
0.102506	-0.0234959	-696
0.278008	-0.28965	-712
-0.11274	-0.0800996	-248
-0.136868	-0.11459	-248
-0.112347	-0.102112	-250
-0.116986	-0.157936	-254
-0.122981	-0.0735216	-256
-0.000382239	-0.0649395	-254
-0.106817	-0.0687295	-250
0.142345	0.222197	-262
0.112703	0.180054	-224
0.260781	0.0807218	-240
0.240114	-0.0146995	-242
0.110603	0.0217704	-244
0.201335	0.113571	-246
0.185925	0.0371002	-250
0.199843	0.0355971	-250
0.115347	0.0737802	-256
0.146487	0.11029	-260
0.238454	-0.199716	-244
0.325034	-0.174034	-238
0.251	-0.264841	-252
0.259113	0.213969	270
0.0583496	0.154572	264
0.25856	0.261403	256
0.190964	0.220437	248
0.155762	0.00262289	276
0.145356	0.125584	274
0.155095	0.0450108	268
0.179669	-0.0448679	266
0.267791	0.00753992	266
0.192095	-0.043074	260
0.233043	0.138863	258
0.254813	-0.128772	262
0.19869	-0.284194	272
-0.169407	-0.0681453	738
0.223726	0.147726	742
0.188439	0.0584482	746
0.197368	0.109149	750
0.299082	-0.0913668	756
0.264579	-0.0855896	738
0.374286	-0.125736	1236
0.221186	0.186636	-1658
0.0552756	0.00456942	-1174
0.0941774	0.187651	-258
0.189491	0.162171	-236
0.161572	-0.0670244	-256
0.236242	0.249346	280
0.163488	0.0208759	278
0.13569	0.0387001	244
0.245483	0.0330684	258
0.167879	0.0930117	766
0.220223	0.206757	744

## Sheet: Sheet2
0.317551	-0.108846	272
0.323756	-0.130394	250
