# Supplementary material for: Spinal premotor interneurons controlling antagonistic muscles are spatially intermingled
Source: eLife. 2022 Dec 13;11:e81976. doi: 10.7554/eLife.81976 (PMC9844990; doi:10.7554/eLife.81976)
Supplement: Figure 12—figure supplement 5—source data 1. — The x-y coordinates are normalized (between –0.5 and 0.5) and scaled to an idealized spinal cord of dimensions 1700 μm and 900 μm in the mediolateral and dorsoventral directions respectively, while z coordinates are in micron, with the axis origin taken at the border between L4 and L5 and negative values in the rostral direction. [file elife-81976-fig12-figsupp5-data1.xlsx]

## Sheet: Sheet1
-0.248309	0.199332	1990.27
-0.286263	-0.295259	1990.27
0.347879	-0.14268	1993.05
0.411572	-0.195159	1993.05
0.428877	-0.105951	1998.61
0.304345	-0.0502508	1993.05
0.23343	0.064834	1990.27
0.389477	-0.067277	1913.05
0.363637	0.0058526	1910.27
0.278531	0.117454	1910.27
0.265356	0.240487	1910.27
0.292382	0.164742	1910.27
0.0573527	0.0906011	1910.27
-0.173123	-0.345789	1827.49
-0.18075	-0.256298	1827.49
0.395309	-0.178519	1833.05
-0.0596706	-0.06692	1747.49
0.154562	0.0254134	1750.27
0.141408	0.139466	1747.49
0.194451	0.288061	1750.27
0.221019	0.264641	1747.49
0.306272	0.0192193	1750.27
0.359457	0.0352479	1750.27
0.27739	-0.0384175	1747.49
0.345231	-0.16746	1750.27
0.29012	-0.27967	1747.49
-0.220071	-0.249584	1670.27
-0.0979389	-0.167682	1667.49
0.329512	-0.227451	1670.27
0.381365	-0.174004	1670.27
0.337555	0.246692	1670.27
0.0907518	0.00677033	1670.27
-0.216609	-0.261072	1593.05
-0.113687	-0.23774	1593.05
-0.134193	-0.205874	1593.05
-0.216517	-0.0946696	1593.05
0.0851076	-0.00366982	1593.05
0.264338	-0.163771	1593.05
0.368791	0.0186452	1593.05
0.387203	0.0386643	1593.05
0.259509	0.172514	1593.05
0.299283	0.206764	1593.05
0.169049	0.0124758	1513.05
0.308986	-0.291142	1513.05
0.417761	-0.175616	1513.05
0.234641	0.115767	1510.27
-0.155712	-0.342968	1510.27
-0.130066	-0.193591	1513.05
-0.223228	-0.216902	1510.27
0.274799	0.125411	1510.27
0.231518	0.071884	1430.27
0.236895	-0.0168563	1430.27
0.289146	-0.134713	1433.05
0.260878	0.201704	1430.27
0.160436	0.124024	1430.27
0.156973	0.15181	1430.27
0.197134	0.0829256	1430.27
0.186136	0.0571173	1430.27
-0.202569	-0.269818	1350.27
-0.205872	-0.0978706	1350.27
-0.241746	-0.0810821	1347.49
0.244959	-0.1674	1350.27
0.227231	0.00140069	1350.27
0.19414	0.112037	1350.27
0.174395	0.171906	1350.27
0.238595	0.206598	1350.27
0.0980556	0.237348	1350.27
0.122812	0.0965641	1350.27
0.299385	0.0191024	1350.27
0.252053	0.0693971	1350.27
-0.185724	-0.158211	1267.49
-0.233726	0.0492158	1267.49
-0.11928	0.280934	1267.49
-0.111118	-0.241039	1273.05
0.174089	0.0577407	1273.05
0.221164	0.131058	1267.49
0.283642	0.0405618	1270.27
0.30147	-0.0309114	1264.71
0.294037	-0.0898808	1267.49
0.268129	-0.168155	1264.71
-0.20325	-0.0146995	1195.83
-0.204151	0.00161675	1195.83
0.0129639	0.0283181	1193.05
0.187103	0.0176915	1193.05
0.159789	0.0760238	1187.49
0.172755	0.119828	1193.05
0.200907	0.133947	1187.49
0.234091	0.10433	1190.27
0.150289	0.256372	1187.49
0.169928	0.188705	1193.05
0.183039	0.174724	1184.71
0.283375	0.257383	1193.05
0.285226	0.2141	1187.49
0.328695	0.120481	1184.71
0.324554	-0.0353942	1187.49
0.267431	-0.0749504	1187.49
0.275743	-0.155535	1187.49
0.310716	-0.171841	1187.49
0.269225	-0.407503	1187.49
0.0877276	0.276926	1193.05
-0.0959509	-0.0778217	1104.71
-0.0905676	-0.234325	1115.83
-0.0642562	-0.192175	1107.49
-0.0251404	-0.171172	1107.49
0.276932	0.00488864	1110.27
0.248196	0.0501733	1113.05
0.380961	0.0273474	1113.05
0.178988	0.209236	1104.71
0.157653	0.140103	1104.71
-0.0679085	-0.144117	1035.83
-0.11686	-0.313271	1035.83
0.267051	-0.308857	1035.83
0.248242	-0.391129	1035.83
0.329867	-0.349771	1035.83
0.311824	-0.0514288	1035.83
0.278124	-0.0294979	1038.61
0.251062	0.0313595	1035.83
0.318308	0.0615195	1035.83
0.297962	0.0541337	1038.61
0.226703	0.0294359	1038.61
0.219025	0.0781677	1033.05
0.249509	0.143208	1038.61
0.197141	0.102828	1033.05
0.172141	0.1399	1035.83
0.136257	0.156792	1035.83
0.121844	0.0872005	1035.83
0.156003	0.0741299	1033.05
0.289394	0.118837	1038.61
0.0912682	0.285872	1033.05
0.0235812	0.0471237	1030.27
-0.118676	-0.242047	955.83
0.165968	-0.128385	958.61
0.191603	-0.0450223	955.83
0.278223	-0.153978	953.05
0.223403	-0.347553	958.61
0.211309	0.0502883	958.61
0.236433	0.0410608	955.83
0.243829	0.0273858	955.83
0.267808	0.138564	955.83
0.235134	-0.0598712	955.83
0.293689	-0.0684529	955.83
0.12119	0.119882	958.61
0.0981693	0.233366	958.61
0.116167	0.274641	955.83
0.192672	0.110877	958.61
0.180113	0.0706478	958.61
0.0336716	0.0789151	958.61
-0.128835	-0.200536	873.05
-0.10381	-0.225811	878.61
-0.15443	-0.324225	873.05
-0.173779	0.0855589	870.27
0.198706	0.0153901	870.27
0.194923	-0.0201037	873.05
0.239345	-0.134499	870.27
0.414648	0.0188156	873.05
0.416691	0.0392387	878.61
0.314565	0.106919	878.61
0.275225	0.251172	878.61
0.179806	0.111581	873.05
-0.127974	-0.263763	793.05
-0.179	-0.257544	798.61
-0.185773	-0.179888	798.61
-0.175653	-0.115449	795.83
-0.198081	0.114771	798.61
-0.0370838	0.0346609	798.61
0.0884255	0.164042	798.61
0.149121	0.184179	798.61
0.214855	0.245625	795.83
0.336955	0.215124	795.83
0.344181	0.121899	798.61
0.312283	0.101879	798.61
0.330907	0.0606276	798.61
0.321413	0.0275658	798.61
0.359543	0.0490951	798.61
0.380748	0.0310875	798.61
0.442106	-0.0313952	798.61
0.313979	-0.0270308	798.61
0.311357	-0.174296	798.61
0.206646	-0.0270588	795.83
0.24897	0.0191873	795.83
0.184704	0.0226351	798.61
0.223447	0.088268	798.61
0.165924	-0.0391218	798.61
0.260984	-0.409033	798.61
0.242834	-0.356127	795.83
0.315357	-0.321624	715.828
0.417034	-0.165025	715.827
0.27793	-0.128094	713.048
0.268181	0.0331284	715.828
0.243898	0.0161746	715.828
0.199589	0.0101125	713.048
0.173628	0.0238849	713.049
0.16714	0.108316	715.829
0.07849	0.0639695	715.829
0.0499143	0.0179693	710.27
-0.0277268	0.0267386	713.05
0.225673	0.104394	718.608
0.262311	0.170702	710.268
0.353283	0.108354	718.607
0.157876	0.217362	718.609
-0.00807437	-0.162128	710.27
-0.142409	-0.153785	710.271
-0.0855257	-0.196174	707.491
-0.123709	-0.212545	710.271
-0.171702	-0.108958	718.611
-0.141453	-0.0954917	630.27
-0.124474	-0.101017	630.27
-0.146289	-0.211808	633.05
-0.228805	0.0944662	630.27
-0.152295	-0.241353	627.49
0.115366	0.0460262	630.27
0.131282	0.0438353	630.27
0.17707	0.0225735	633.05
0.225518	0.00467742	633.05
0.186463	0.0618949	633.05
0.187376	0.0768314	627.49
0.143332	0.0886058	635.83
0.103514	0.136762	633.05
0.264474	-0.16969	633.05
0.293217	-0.0629448	635.83
0.327448	-0.0595715	635.83
0.43258	-0.102013	633.05
0.412742	0.0531321	630.27
0.370289	0.116318	633.05
0.279299	0.102001	633.05
0.24288	0.185821	630.27
0.166257	0.250196	633.05
0.134424	0.180891	633.05
0.220388	0.113636	635.83
0.220966	0.0786113	633.05
0.288099	0.0358033	633.05
-0.143581	-0.223771	558.61
-0.151495	-0.304032	558.61
-0.10262	-0.27906	558.61
-0.0682632	-0.262439	558.61
-0.217213	0.21311	555.83
-0.0107572	-0.118192	558.61
0.116305	0.187163	558.61
0.129202	0.117234	550.27
0.181019	0.102471	558.61
0.165194	0.0510538	555.83
0.220172	0.0184244	555.83
0.232106	0.071132	553.05
0.243168	0.115992	558.61
0.302208	0.0513472	558.61
0.341237	-0.070822	558.61
0.121554	0.259022	558.61
0.199659	-0.259497	555.83
0.258399	-0.307411	558.61
-0.171177	-0.205083	475.83
-0.165281	-0.246109	475.83
-0.155326	-0.212619	475.83
-0.10104	-0.188526	478.61
-0.109602	0.0287162	475.83
-0.0595574	-0.189016	478.61
-0.0541259	-0.333556	478.61
0.0143477	-0.0927878	473.05
0.00929965	0.0799808	475.83
0.104281	0.107149	478.61
0.134754	0.156484	478.61
0.159605	0.124253	478.61
0.151558	0.105236	478.61
0.157847	0.0940858	478.61
0.14798	0.040096	478.61
0.161996	0.0225659	478.61
0.207888	0.165573	478.61
0.170069	0.191854	475.83
0.244589	0.165201	475.83
0.286201	0.187468	475.83
0.300832	0.143249	478.61
0.280485	0.132103	478.61
0.30382	0.125318	478.61
0.296934	0.0891037	478.61
0.258405	0.0928504	478.61
0.242293	0.0898347	478.61
0.246018	0.0574654	478.61
0.239668	0.0274173	478.61
0.255433	0.00297527	478.61
0.18688	-0.00629422	475.83
0.264918	-0.121228	478.61
0.288097	-0.202913	478.61
0.315227	-0.145368	478.61
0.3681	-0.191826	478.61
0.261426	-0.314008	478.61
0.406352	-0.0690543	478.61
0.398609	0.0308468	478.61
0.335548	0.0584693	475.83
0.30705	-0.0814249	478.61
0.358296	0.111545	478.61
-0.211762	0.0490147	390.27
-0.131052	0.017277	387.49
-0.0332665	-0.100183	387.49
-0.0860261	-0.244191	393.05
-0.104268	-0.228073	387.49
0.132535	0.0724558	393.05
0.146276	0.0711046	393.05
0.161114	0.0455593	387.49
0.179482	0.0780282	390.27
0.192181	0.0338418	390.27
0.229411	0.0498366	387.49
0.253439	0.0537241	390.27
0.255833	-0.00034552	387.49
0.234109	0.103128	390.27
0.167831	0.126927	395.83
0.131662	0.178994	395.83
0.0702608	0.139553	393.05
0.0221373	0.0735357	393.05
0.280513	0.184082	390.27
0.28535	0.173029	390.27
0.33175	0.150043	387.49
0.3159	0.121157	395.83
0.332586	0.0763065	395.83
0.333352	0.0625864	393.05
0.330033	0.0429537	387.49
0.371901	0.0359111	395.83
0.383674	0.000728685	393.05
0.330296	-0.0382062	390.27
0.297476	-0.069978	393.05
0.296156	-0.211223	390.27
0.204478	-0.199599	393.05
0.117643	0.123141	393.05
-0.120489	-0.30161	310.268
-0.157845	-0.300595	310.267
-0.118226	-0.0937953	307.489
-0.0808779	0.0053129	313.05
-0.0788969	0.0462989	307.49
0.0466423	0.0649952	315.831
0.162292	0.0475894	313.051
0.163122	-0.0159797	307.491
0.141363	0.0488555	315.831
0.196941	0.113932	315.832
0.2273	0.110567	313.052
0.255351	0.0403054	315.832
0.293431	0.0320702	313.052
0.288324	0.0499483	315.832
0.354163	0.054303	310.272
0.279427	0.187439	313.053
0.241237	0.181437	310.273
0.234724	0.227221	310.273
0.218342	0.161577	318.612
0.177714	0.0130469	310.271
0.18014	0.0893258	310.272
0.279811	-0.0243458	313.051
0.348807	0.131454	307.493
-0.0935748	-0.224969	230.27
-0.0810297	-0.185766	230.27
-0.0539045	-0.238091	233.05
0.0884751	0.103025	238.61
0.103907	0.10018	235.83
0.135174	0.0944637	235.83
0.182532	0.0706681	233.05
0.199952	0.0728377	235.83
0.198931	0.0899738	238.61
0.139355	0.188898	230.27
0.234351	0.0734091	233.05
0.167456	-0.23933	230.27
0.186462	-0.296545	233.05
0.241628	-0.183833	235.83
0.363482	-0.167102	233.05
0.337462	0.108692	238.61
0.274033	0.156303	235.83
0.310479	0.221515	235.83
0.284738	0.241062	238.61
0.297281	0.214176	235.83
0.345515	0.201759	238.61
0.215042	0.226004	238.61
0.200039	0.289763	230.27
0.299667	0.12025	238.61
0.3184	0.147166	230.27
0.303229	0.0307596	235.83
0.0581617	-0.0229678	233.05
-0.133386	-0.100195	150.263
-0.0929906	-0.165567	147.483
-0.0356332	-0.106806	153.047
-0.185843	-0.150272	150.26
-0.19114	-0.112854	150.26
-0.276035	0.182372	158.602
0.0871168	0.0379094	153.055
0.119298	0.0134498	153.055
0.117119	0.0250346	155.836
0.185506	0.0203084	147.499
0.155994	0.0690242	153.058
0.0986838	0.0807871	150.276
0.0196793	0.0927899	153.053
-0.0151007	0.0448406	153.05
0.184692	0.209797	150.283
0.228141	0.119593	153.063
0.233869	0.0944309	155.842
0.316828	0.080136	155.846
0.331234	0.137266	153.068
0.321156	0.0530559	150.285
0.338438	0.0501363	155.846
0.298407	0.026819	153.064
0.303757	-0.00889018	158.623
0.360901	-0.0741581	150.284
0.414272	-0.168677	153.065
-0.147646	-0.194068	73.05
0.0750125	0.0520102	78.61
0.038403	0.0116487	70.27
0.0572387	0.0947097	73.05
0.129518	0.0977041	73.05
0.116853	0.158693	75.83
0.0851263	0.105465	70.27
0.109221	0.0587484	75.83
0.178743	0.0762679	73.05
0.162334	0.10346	73.05
0.191246	0.10477	73.05
0.21698	0.108808	70.27
0.210842	0.140486	73.05
0.182713	0.152655	73.05
0.207513	0.174252	73.05
0.268598	0.131304	73.05
0.254051	0.115193	73.05
0.228154	0.0906768	70.27
0.217651	0.0386667	73.05
0.237442	0.0474021	73.05
0.238088	0.0410877	70.27
0.262059	0.0413378	70.27
0.291555	0.0218446	70.27
0.303468	0.00170288	75.83
0.337863	0.0404753	73.05
0.356404	0.016066	73.05
0.342787	-0.027684	70.27
0.323466	0.174868	70.27
0.273402	0.169461	73.05
0.323415	0.218955	75.83
0.129955	0.297663	70.27
0.22322	-0.13838	70.27
0.246802	-0.24573	73.05
0.264325	-0.174314	70.27
0.254394	-0.097883	70.27
0.304045	-0.301685	73.05
0.348024	-0.133145	70.27
0.302088	0.0674803	75.83
0.13765	0.0413936	73.05
-0.332839	0.0853774	-1.39
-0.248958	-0.00290691	-1.39
-0.186086	0.241192	-4.17
-0.118751	-0.162037	-6.95
-0.0536021	-0.231437	-1.39
-0.0167616	-0.205395	-1.39
0.0369188	0.00447688	-1.39
0.057216	0.0186183	-1.39
0.105147	0.0621128	-1.39
0.160794	0.0769712	-1.39
0.155595	0.0532502	-1.39
0.124406	0.140114	-1.39
0.181802	0.0423544	-4.17
0.192097	0.0428845	-4.17
0.192764	0.0185465	-1.39
0.193862	-0.00287454	-1.39
0.160569	-0.114535	-4.17
0.127327	-0.233335	-1.39
0.25072	-0.137898	-4.17
0.226355	-0.313104	-1.39
0.303035	-0.341977	-1.39
0.304114	-0.370572	-1.39
0.3112	-0.0861425	-1.39
0.24575	-0.10094	-1.39
0.352264	-0.0962281	-1.39
0.365469	-0.0710131	-1.39
0.312899	0.00114348	-1.39
0.414445	-0.0413223	-4.17
0.314417	0.054176	-1.39
0.27249	0.102834	-1.39
0.270525	0.0498118	-1.39
0.23808	0.0297996	-1.39
0.231109	0.00765765	-1.39
0.243561	0.00631058	-4.17
0.238432	-0.0209437	-1.39
0.309291	0.188887	-1.39
0.198539	0.129163	-1.39
0.346424	0.0749674	-1.39
-0.180034	-0.146144	-86.95
-0.140626	-0.214564	-81.39
-0.134583	-0.239517	-81.39
-0.0432715	-0.147385	-89.73
0.117846	0.0651776	-86.95
0.147626	0.0719478	-81.39
0.158793	0.0763977	-81.39
0.171556	0.0640457	-84.17
0.145838	0.040849	-81.39
0.0808098	0.121732	-81.39
0.1357	0.143405	-84.17
0.131181	0.195231	-81.39
0.178621	0.183968	-86.95
0.165292	0.103571	-81.39
0.204214	0.119597	-86.95
0.238217	0.131583	-84.17
0.234982	0.182103	-81.39
0.261139	0.175417	-81.39
0.309145	0.154299	-81.39
0.25362	0.147083	-86.95
0.309454	0.103091	-81.39
0.360376	0.11319	-86.95
0.379061	0.145974	-81.39
0.324527	0.0117058	-86.95
0.298019	0.0176834	-84.17
0.216226	0.0506692	-81.39
0.194577	0.0347608	-86.95
0.234842	-0.0927162	-81.39
0.295018	-0.195546	-86.95
0.325977	-0.203723	-84.17
0.345032	-0.0910098	-84.17
0.410261	-0.134336	-81.39
0.282863	-0.113546	-81.39
0.248645	-0.268459	-84.17
0.187398	-0.148925	-86.95
-0.22593	-0.162765	-161.39
-0.109505	-0.222977	-161.39
-0.0828534	-0.248584	-161.39
-0.0309247	-0.184205	-161.39
-0.163883	-0.287982	-161.39
0.0293399	0.0185867	-161.39
-0.0271634	0.061781	-161.39
0.100231	0.101567	-161.39
0.160046	0.1378	-161.39
0.166279	0.113069	-161.39
0.199729	0.143316	-161.39
0.234108	0.0987385	-161.39
0.248576	0.077488	-161.39
0.271762	0.106212	-161.39
0.290687	0.119372	-161.39
0.310904	0.158256	-161.39
0.319947	0.140968	-161.39
0.30058	0.18376	-161.39
0.293907	0.0677209	-161.39
0.281444	0.0518186	-161.39
0.275733	0.0281366	-161.39
0.24676	0.034185	-161.39
0.249578	0.00957391	-161.39
0.259696	0.0299583	-161.39
0.21403	0.0403655	-161.39
0.216708	0.0679256	-161.39
0.19075	0.0682113	-161.39
0.190488	0.0430801	-161.39
0.19328	0.015956	-161.39
0.213186	-0.0103187	-161.39
0.249661	-0.104395	-161.39
0.244271	-0.137388	-161.39
0.262954	-0.150398	-161.39
0.319065	-0.266443	-161.39
0.340391	-0.333078	-161.39
0.221614	-0.278231	-161.39
0.265524	-0.212937	-161.39
-0.114111	-0.0930959	-244.17
-0.111822	0.188341	-244.17
-0.0826847	-0.214007	-244.17
-0.0489208	-0.151735	-241.39
0.00271963	-0.049036	-241.39
0.0437372	0.0404524	-241.39
0.0857341	0.0853783	-241.39
-0.0535536	-0.0151013	-241.39
0.146907	0.118375	-241.39
0.156743	0.145345	-241.39
0.142461	0.160172	-241.39
0.172351	0.0987465	-241.39
0.192493	0.0503443	-241.39
0.223227	0.0547844	-241.39
0.22778	0.0340955	-244.17
0.254815	0.129208	-241.39
0.24192	0.139318	-241.39
0.222396	0.151837	-241.39
0.194865	0.175012	-241.39
0.31314	0.137527	-241.39
0.367885	0.106471	-241.39
0.301983	-0.017279	-241.39
0.320094	-0.0446391	-241.39
0.291916	-0.0568165	-246.95
0.266918	-0.111441	-241.39
0.215615	-0.0993075	-241.39
0.195016	-0.136983	-244.17
0.182062	-0.340711	-241.39
0.397763	-0.382792	-241.39
0.174293	0.030504	-241.39
0.285697	0.0430708	-241.39
0.301127	0.230559	-241.39
0.0269981	-0.00756249	-246.95
-0.0648388	-0.0118872	-326.95
-0.0451722	-0.052767	-324.17
-0.0802564	-0.217508	-324.17
-0.0832503	-0.170398	-321.39
-0.0878448	0.0903922	-321.39
0.0019523	0.0963445	-321.39
0.0495791	0.0817652	-324.17
0.0565801	0.127749	-321.39
0.112657	0.0570861	-321.39
0.0818431	0.0546639	-321.39
0.117497	0.0225893	-321.39
0.1644	0.026571	-324.17
0.144325	-0.00600074	-321.39
0.187477	0.0141177	-321.39
0.22821	-0.022359	-321.39
0.231507	-0.230021	-321.39
0.331125	-0.239726	-326.95
0.239434	0.0892809	-321.39
0.24805	0.109451	-324.17
0.292107	0.144557	-321.39
0.305986	0.137827	-321.39
0.310145	0.128518	-321.39
0.299002	0.231983	-321.39
0.177342	0.208366	-321.39
0.396856	0.032445	-321.39
0.147052	0.0912918	-321.39
0.179545	0.092376	-321.39
0.243054	0.127028	-321.39
0.245934	-0.0350129	-321.39
0.21885	0.0935388	-321.39
0.273598	0.163115	-321.39
-0.131302	-0.122629	-404.17
-0.127353	-0.206391	-401.39
-0.0653858	-0.156461	-401.39
0.0314305	0.0587659	-401.39
-0.121143	0.187396	-401.39
-0.0855229	0.26389	-401.39
0.0929481	0.104727	-401.39
0.12451	0.0976658	-401.39
0.150159	0.126835	-401.39
0.162933	0.111712	-401.39
0.164329	0.180243	-401.39
0.114858	0.193239	-401.39
0.195457	0.168979	-401.39
0.202791	0.216658	-401.39
0.20263	0.121588	-401.39
0.243564	0.106326	-401.39
0.27946	0.139194	-401.39
0.291373	0.11916	-401.39
0.300754	0.115852	-401.39
0.304617	0.129909	-401.39
0.280031	0.224485	-401.39
0.330543	0.0703092	-401.39
0.314604	-0.02465	-401.39
0.280896	-0.0254692	-401.39
0.271636	0.0544578	-401.39
0.22894	0.0368318	-401.39
0.236122	-0.00606586	-401.39
0.205028	0.0258709	-401.39
0.192566	-0.0327387	-401.39
0.167035	0.0139308	-401.39
0.212016	-0.160337	-401.39
0.294912	-0.261961	-404.17
-0.195401	-0.148757	-481.39
-0.197842	-0.22076	-481.39
-0.096199	-0.252701	-481.39
-0.14431	-0.097784	-481.39
-0.108592	0.230692	-481.39
0.0161557	0.0300007	-481.39
0.125505	0.056418	-481.39
0.127718	0.0747569	-481.39
0.101422	0.16282	-481.39
0.145319	0.0722806	-481.39
0.158146	0.099117	-481.39
0.185424	0.0621132	-481.39
0.200883	0.0544947	-481.39
0.213804	0.0337048	-481.39
0.241686	0.0431726	-481.39
0.225634	0.0714541	-481.39
0.259538	0.0871713	-481.39
0.267943	0.0779044	-481.39
0.272668	0.104824	-481.39
0.260142	0.133644	-481.39
0.263954	-0.0115826	-481.39
0.310727	-0.0327181	-481.39
0.321675	-0.0255169	-481.39
0.259469	-0.0794088	-481.39
0.22779	-0.0724003	-481.39
0.239196	-0.0373945	-481.39
0.216321	-0.0313332	-481.39
0.160167	-0.161385	-481.39
0.16245	-0.0239992	-481.39
0.231374	-0.241774	-481.39
0.245446	-0.246888	-481.39
0.285835	-0.279381	-481.39
-0.0769005	-0.152267	-564.17
-0.0346903	-0.160231	-569.73
-0.059963	-0.215538	-569.73
-0.117449	-0.134462	-566.95
-0.126079	-0.168919	-575.29
-0.150091	-0.200221	-564.17
0.0218448	-0.0654802	-569.73
0.0815811	0.0544839	-569.73
0.107052	0.0827957	-569.73
0.152679	0.0908209	-566.95
0.170802	0.0123907	-566.95
0.221915	0.0236644	-569.73
0.2457	0.0188182	-564.17
0.254912	0.00839053	-566.95
0.0768531	0.196776	-564.17
0.189573	0.198005	-569.731
0.223351	0.117728	-569.73
0.245052	0.125829	-566.95
0.268992	0.0891926	-566.95
0.273661	0.0633184	-566.95
0.279721	0.0746197	-564.17
0.299258	0.0652214	-566.95
0.323309	0.0915645	-569.73
0.302925	0.12196	-564.17
0.28752	0.161731	-566.95
0.286099	0.197677	-569.731
0.366881	0.153159	-569.731
0.289147	0.00799059	-566.95
-0.144957	-0.17107	-649.73
0.0533714	0.0905169	-649.73
0.0925612	0.0511966	-649.73
0.0986496	0.175343	-649.73
0.107908	0.185143	-646.95
0.116489	0.18104	-644.17
0.12076	0.209807	-646.95
0.105375	0.210038	-652.51
0.195142	0.17893	-646.95
0.226128	0.121848	-652.51
0.242556	0.11167	-649.73
0.243173	0.0907835	-646.95
0.236857	0.0869097	-652.51
0.246651	0.0599243	-646.95
0.22641	0.0353723	-649.73
0.255379	0.0349647	-652.51
0.253168	0.149279	-646.95
0.238587	0.18826	-652.51
0.210293	0.248301	-655.29
0.253294	0.196989	-649.73
0.278804	0.254281	-655.29
0.319533	0.137412	-652.51
0.308084	0.0809065	-644.17
0.381273	0.00434599	-652.51
0.236869	-0.0369759	-652.51
0.15656	0.287829	-655.29
-0.127193	-0.26514	-724.17
-0.121105	-0.244889	-729.73
-0.141828	-0.219646	-729.73
-0.0675747	-0.140744	-721.39
-0.0146196	-0.0886253	-729.73
0.0119965	0.0257309	-726.95
0.0430491	0.0303818	-726.95
0.0724684	0.0803974	-724.17
0.0891043	0.0931601	-729.73
0.08359	0.0364695	-729.73
0.100793	0.0257439	-726.95
0.185899	0.128003	-721.39
0.212048	0.133277	-726.95
0.205249	0.0939893	-724.17
0.206198	0.0784779	-721.39
0.233806	0.0609573	-721.39
0.180128	0.0300764	-724.17
0.228065	-0.0370788	-724.17
0.123663	-0.196892	-732.51
0.249877	0.0262729	-721.39
0.261714	0.0480034	-729.73
0.271484	0.0817512	-726.95
0.256645	0.0875218	-729.73
0.241911	0.101635	-729.73
0.240622	0.118216	-726.95
0.288053	0.140108	-724.17
0.351409	0.0960678	-721.39
0.287844	0.212353	-726.95
0.273732	0.25771	-726.95
0.235564	0.337244	-721.39
0.130954	0.221427	-721.39
0.0873713	0.191398	-721.39
-0.245471	0.244282	-732.51
-0.21349	-0.07486	-721.39
-0.143264	-0.107547	-726.95
0.425992	0.0164446	-721.39
0.423941	-0.0170358	-721.39
-0.172879	-0.134304	-812.51
-0.0831614	-0.189894	-815.29
-0.00402893	-0.102143	-815.29
-0.0750271	-0.304393	-812.51
0.283039	-0.145292	-806.95
0.391672	-0.314887	-806.95
0.40304	-0.00912572	-809.73
0.418735	0.0193376	-815.29
0.380639	-0.0359437	-809.73
0.319303	0.0220641	-806.95
0.287479	-0.0625847	-804.17
0.277398	-0.0419255	-804.17
0.271367	0.0371085	-809.73
0.308268	0.115977	-809.73
0.32205	0.138988	-812.51
0.28239	0.135061	-809.73
0.270838	0.121884	-812.51
0.24965	0.130102	-815.29
0.223192	0.118675	-806.95
0.23086	0.220295	-809.73
0.206173	0.207797	-806.95
0.220597	0.248185	-815.29
0.189336	0.250525	-806.95
0.136455	0.218282	-815.29
0.103739	0.197636	-809.73
0.087629	0.196515	-806.95
0.0925581	0.0930344	-812.51
0.0650539	0.0853849	-809.73
0.013773	0.0222323	-815.29
0.0923245	0.0446045	-812.51
0.117091	0.0473794	-812.51
0.131977	0.047167	-815.29
0.143095	0.0281229	-809.73
0.177322	-0.00086925	-812.51
0.16976	0.114247	-812.51
0.173488	0.0776552	-806.95
-0.137707	-0.227644	-886.95
0.0439327	-0.00114379	-886.95
0.0635725	0.0271051	-884.17
0.074656	0.114653	-884.17
0.119085	0.0474118	-884.17
0.115837	0.0267514	-881.39
0.117413	-0.0107916	-884.17
0.156622	0.0387323	-884.17
0.154154	0.0546685	-886.95
0.145256	0.0766317	-881.39
0.177901	0.0753487	-881.39
0.178666	0.0495479	-884.17
0.203923	0.0338939	-886.95
0.184303	-0.0150015	-886.95
0.185236	0.104096	-884.17
0.167235	0.126517	-889.73
0.223583	0.0886857	-884.17
0.221524	0.104623	-886.95
0.228091	0.113606	-884.17
0.235442	0.0795003	-881.39
0.23861	0.0346348	-886.95
0.245155	0.0133203	-884.17
0.222651	-0.0373162	-886.95
0.262783	0.0795537	-881.39
0.260344	0.0930144	-881.39
0.289238	0.0704174	-886.95
0.281131	0.143116	-886.95
0.281202	0.15365	-881.39
0.274632	0.141975	-884.17
0.298758	0.165804	-881.39
0.272627	0.188427	-884.17
0.245699	0.195107	-884.17
0.228117	0.148616	-884.17
0.151059	0.238686	-884.17
0.349753	0.231449	-886.95
0.284539	0.251283	-881.39
0.277178	0.271922	-884.17
0.352852	0.00927286	-886.95
0.271157	-0.148291	-886.95
0.204982	-0.345929	-884.17
0.311688	-0.0068301	-881.39
0.394467	-0.00214783	-886.95
0.405533	0.0210391	-884.17
-0.159012	-0.0731666	-889.73
-0.119513	0.0404402	-969.73
-0.093996	-0.0864114	-972.51
-0.0927682	-0.18563	-966.95
-0.0510877	-0.219855	-964.17
-0.132881	-0.204534	-969.73
0.0636921	-0.0767673	-964.17
0.0418567	0.0208459	-969.73
0.000848518	0.0579374	-969.73
0.0604718	0.104706	-969.73
0.0894379	0.143436	-969.73
0.102106	0.172697	-969.73
0.125203	0.169965	-969.73
0.135454	0.118413	-966.95
0.125134	0.0639169	-966.95
0.177639	0.0692511	-966.95
0.216293	0.0562998	-966.95
0.206693	0.0282049	-964.17
0.170206	-0.016613	-964.17
0.255878	-0.0229131	-969.73
0.332035	-0.00979071	-964.17
0.320834	-0.01336	-966.95
0.317242	0.0145147	-966.95
0.348935	0.0914981	-966.95
0.289013	0.099476	-966.95
0.280321	0.108439	-966.95
0.276408	0.0911573	-964.17
0.26012	0.0938734	-961.39
0.245983	0.132523	-961.39
0.256864	0.166061	-964.17
0.270581	0.151363	-966.95
0.2762	0.161227	-964.17
0.286858	0.167545	-964.17
0.30227	0.133246	-964.17
0.259921	0.239053	-969.73
0.275525	0.257583	-964.17
0.33976	0.239651	-964.17
0.268519	-0.361768	-972.51
0.268201	-0.433544	-975.29
0.213046	-0.303007	-964.17
-0.0640535	-0.133039	-1049.73
-0.0806158	-0.13775	-1052.51
-0.0596789	0.0884648	-1046.95
-0.250268	0.270599	-1046.95
0.0213675	0.0560667	-1049.73
0.0889225	0.133733	-1046.95
0.105705	0.188098	-1046.95
0.0989203	0.207702	-1046.95
0.115364	0.274514	-1044.17
0.146727	0.229073	-1041.39
0.212873	0.228479	-1041.39
0.254852	0.197244	-1041.39
0.258135	0.157	-1044.17
0.273178	0.146579	-1044.17
0.26941	0.206371	-1041.39
0.31827	0.0835282	-1041.39
0.273212	0.0929912	-1046.95
0.266983	0.0756607	-1044.17
0.256848	-0.0205712	-1044.17
0.203893	-0.0262789	-1044.17
0.23096	0.0605552	-1044.17
0.198646	0.0938598	-1041.39
0.193736	0.11139	-1041.39
0.177924	0.129948	-1044.17
0.183147	0.154587	-1044.17
0.152158	0.107351	-1049.73
0.336631	-0.205699	-1058.07
0.39078	-0.238511	-1046.95
0.225502	0.116049	-1046.95
0.280883	-0.108884	-1044.17
-0.151545	-0.233441	-1124.17
-0.160466	-0.021345	-1121.39
-0.318123	0.0401131	-1121.39
-0.0539497	-0.209043	-1124.17
0.0116802	-0.0436092	-1121.39
0.0493136	0.0368323	-1124.17
0.118428	0.0548981	-1124.17
0.132184	0.0695299	-1124.17
0.0966718	0.0562733	-1124.17
0.0862359	0.0712807	-1121.39
0.121304	0.118445	-1121.39
0.0943147	0.188756	-1121.39
0.201727	0.158593	-1121.39
0.200843	0.119385	-1124.17
0.255286	0.174766	-1121.39
0.262624	0.161922	-1124.17
0.317054	0.0965335	-1121.39
0.313717	0.0531468	-1121.39
0.316668	0.270256	-1124.17
0.27943	0.272939	-1121.39
0.269129	0.0876951	-1121.39
0.284484	0.0514524	-1121.39
0.270767	0.0548054	-1124.17
0.265492	-0.0157539	-1121.39
0.291471	-0.0472771	-1121.39
0.255986	-0.189047	-1124.17
0.239152	-0.356973	-1121.39
0.374465	-0.412439	-1121.39
0.440943	-0.280308	-1121.39
-0.122925	-0.108096	-1212.51
-0.175805	-0.092997	-1212.51
-0.159485	-0.204165	-1206.95
-0.098309	-0.163385	-1206.95
0.0597963	0.0183107	-1209.73
0.0935058	0.0856289	-1209.73
0.14005	0.100899	-1206.95
0.122746	0.14321	-1204.17
0.0996156	0.174665	-1209.73
0.0830869	0.175189	-1204.17
0.0716369	0.203387	-1204.17
0.174563	0.172834	-1206.95
0.205685	0.19259	-1204.17
0.207488	0.136381	-1201.39
0.187523	0.106735	-1209.73
0.197714	0.0318006	-1212.51
0.166888	0.0140551	-1212.51
0.176245	-0.0123253	-1204.17
0.169488	-0.0717594	-1201.39
0.175844	-0.207603	-1206.95
0.236457	-0.217924	-1204.17
0.234595	-0.247174	-1201.39
0.276789	0.141503	-1209.73
0.256933	0.159673	-1212.51
0.255694	0.141689	-1206.95
0.244858	0.160429	-1209.73
0.245928	0.140968	-1206.95
0.245595	0.203879	-1206.95
0.239708	0.275834	-1206.95
0.201429	-0.293893	-1292.51
0.355836	-0.0515513	-1284.17
0.341914	0.0680397	-1284.17
0.352651	0.109518	-1284.17
0.290637	0.11106	-1286.95
0.259121	0.0793894	-1284.17
0.257228	0.0608555	-1284.17
0.228073	0.0920621	-1286.95
0.182028	0.0145264	-1284.17
0.0819998	0.120195	-1289.73
0.0889566	0.0908351	-1289.73
0.0674593	0.149497	-1289.73
0.0939993	0.174756	-1289.73
0.0390209	0.141654	-1289.73
0.0389509	0.0892007	-1292.51
-0.0453575	-0.136055	-1292.51
-0.0943234	-0.133518	-1286.95
-0.116979	-0.133905	-1289.73
-0.104472	0.038545	-1292.51
0.290498	0.000707518	-1292.51
0.399191	0.0701698	-1292.51
0.334778	0.245228	-1289.73
0.262668	0.14756	-1292.51
0.0434627	0.0273035	-1289.73
-0.0731623	-0.120655	-1289.73
0.243923	-0.254303	-1286.95
-0.115032	-0.121334	-1364.17
0.0505689	0.0579901	-1364.17
0.0464004	0.0224642	-1361.39
0.0718312	0.0561909	-1369.73
0.035734	0.0906977	-1366.95
0.0969351	0.101467	-1369.73
0.153359	0.0715299	-1369.73
0.144878	0.0661688	-1366.95
0.178698	-0.105616	-1366.95
0.218571	0.0283951	-1364.17
0.21984	-0.0441414	-1364.17
0.266234	-0.0387176	-1369.73
0.244339	-0.186458	-1366.95
0.236304	-0.250017	-1369.73
0.249499	-0.300314	-1361.39
0.257987	-0.307056	-1364.17
0.319176	0.0804972	-1361.39
0.32199	0.0190921	-1369.73
0.30231	0.106578	-1369.73
0.271125	0.129593	-1366.95
0.261921	0.141152	-1366.95
0.247242	0.0915628	-1366.95
0.239829	0.171593	-1366.95
0.214276	0.173459	-1361.39
0.235898	0.253214	-1372.51
0.264906	0.257346	-1366.95
0.323845	0.276884	-1364.17
0.344183	0.26381	-1361.39
0.106847	0.23459	-1364.17
0.0999278	0.205206	-1369.73
0.119035	0.199417	-1366.95
0.129473	0.177459	-1366.95
0.00211447	-0.0684678	-1366.95
-0.171032	-0.249557	-1444.17
-0.0581075	-0.140297	-1444.17
0.133983	0.167227	-1444.17
0.133234	0.204851	-1446.95
0.125284	0.200477	-1444.17
0.122311	0.156483	-1441.39
0.136478	0.125499	-1444.17
0.241239	0.173606	-1446.95
0.241865	0.156491	-1446.95
0.261727	0.155182	-1446.95
0.265969	0.106142	-1449.73
0.296385	0.0929435	-1449.73
0.295383	0.0743926	-1444.17
0.312533	0.0563962	-1449.73
0.345555	0.0237273	-1446.95
0.361836	-0.0855339	-1444.17
0.263103	-0.377807	-1446.95
0.19579	-0.180783	-1452.51
0.23126	-0.0752432	-1449.73
0.122749	-0.0266214	-1446.95
0.0495083	-0.016346	-1446.95
-0.0726941	-0.238185	-1449.73
0.232951	0.123843	-1452.51
0.229951	0.171798	-1449.73
0.235759	0.214107	-1444.17
-0.213314	0.0633658	-1532.51
-0.157096	-0.155775	-1526.95
-0.289483	0.201848	-1532.51
0.061875	0.0148594	-1529.73
0.142803	-0.0693269	-1529.73
0.135472	-0.00939194	-1529.73
0.129216	0.0224259	-1532.51
0.265039	-0.330807	-1526.95
0.270058	-0.366836	-1524.17
0.40343	-0.0850331	-1526.95
0.317478	-0.0443275	-1526.95
0.308135	-0.00332715	-1529.73
0.346409	0.0140845	-1532.51
0.329311	0.0688683	-1529.73
0.305199	0.0803189	-1529.73
0.217444	0.0768556	-1526.95
0.196307	0.0923808	-1529.73
0.208325	0.163102	-1526.95
0.274524	0.221175	-1529.73
0.228814	0.265136	-1529.73
0.194026	0.260595	-1532.51
0.119921	0.276146	-1529.73
0.134667	0.154299	-1526.95
0.158179	0.152317	-1526.95
0.15979	0.0890335	-1529.73
0.112142	0.0898382	-1529.73
-0.0252688	-0.250133	-1529.73
0.24056	0.192735	-1526.95
-0.143233	-0.155907	-1606.95
-0.121714	0.161364	-1604.17
0.109782	0.017444	-1601.39
0.104287	0.0280558	-1604.17
0.135558	-0.00122688	-1606.95
0.194214	-0.162407	-1606.95
0.191236	-0.0313052	-1606.95
0.211447	-0.0291779	-1604.17
0.21768	-0.0210109	-1606.95
0.212099	0.0211467	-1601.39
0.22342	0.0458037	-1604.17
0.190707	0.0672822	-1606.95
0.114968	-0.337148	-1604.17
0.261207	0.0618559	-1604.17
0.299779	0.0611473	-1604.17
0.316304	0.00995145	-1606.95
0.324386	-0.00367665	-1601.39
0.34999	0.00505734	-1601.39
0.350094	0.0618181	-1604.17
0.305785	-0.0293341	-1604.17
0.290388	-0.0165247	-1601.39
0.346611	-0.0932816	-1606.95
0.19656	0.166711	-1604.17
0.204553	0.199404	-1606.95
0.255362	0.198326	-1604.17
0.260625	0.140814	-1604.17
0.242237	0.134628	-1601.39
0.232512	0.134153	-1604.17
0.236614	0.106168	-1604.17
0.227617	0.200575	-1606.95
-0.116664	-0.265883	-1684.17
-0.0495427	-0.106797	-1681.39
-0.0561548	-0.0804726	-1681.39
-0.175382	-0.181408	-1681.39
-0.189511	-0.11612	-1681.39
-0.161964	-0.138024	-1684.17
0.0258566	0.00272947	-1681.39
0.122145	0.0516881	-1681.39
0.137643	0.0559314	-1684.17
0.160777	0.0108174	-1681.39
0.207529	-0.0373198	-1681.39
0.241045	-0.213534	-1681.39
0.270668	-0.222406	-1681.39
0.257621	-0.312344	-1681.39
0.217609	-0.342209	-1681.39
0.333347	-0.149423	-1681.39
0.364303	0.00972191	-1684.17
0.330546	0.0165571	-1684.17
0.304438	0.0880849	-1681.39
0.278024	0.0732131	-1681.39
0.348848	0.126182	-1681.39
0.292597	0.0962337	-1681.39
0.237263	0.117278	-1681.39
0.221436	0.119651	-1681.39
0.261935	0.148656	-1681.39
0.282012	0.170899	-1681.39
0.227239	0.197513	-1681.39
0.185642	0.156263	-1681.39
0.182944	0.184893	-1681.39
0.225977	0.253913	-1681.39
0.31479	0.230438	-1684.17
0.356425	0.247338	-1681.39
0.387556	0.102744	-1761.39
0.283904	-0.081547	-1761.39
0.297205	-0.215181	-1761.39
0.320975	-0.19758	-1761.39
0.221918	-0.341541	-1761.39
0.282891	-0.398296	-1761.39
0.074375	-0.231706	-1761.39
0.122318	-0.0700819	-1761.39
0.143065	-0.0218571	-1761.39
0.231947	0.0482628	-1761.39
0.260111	0.0682065	-1761.39
0.257762	0.103612	-1761.39
0.249079	0.116603	-1761.39
0.217955	0.135289	-1761.39
0.247767	0.251671	-1761.39
0.0941194	0.218596	-1761.39
0.0575948	0.138756	-1761.39
0.0513147	0.129203	-1761.39
-0.136907	-0.262053	-1761.39
-0.242967	-0.236702	-1761.39
-0.334683	0.0486733	-1761.39
-0.0595388	-0.201965	-1761.39
0.0550161	-0.040992	-1761.39
0.218466	0.25854	-1761.39
0.297253	-0.00539227	-1761.39
0.319871	-0.201515	-1846.95
0.355928	-0.0980425	-1841.39
0.30303	-0.0566015	-1844.17
0.344795	0.0222152	-1841.39
0.305838	0.062375	-1846.95
0.252922	0.0158498	-1841.39
0.207773	-0.18416	-1846.95
0.195121	0.0125938	-1844.17
0.202488	0.0350926	-1846.95
0.188569	0.0471632	-1841.39
0.234823	0.0894933	-1841.39
0.221648	0.116528	-1841.39
0.280736	0.147082	-1844.17
0.305638	0.16297	-1846.95
0.41009	0.186596	-1841.39
0.249389	0.28166	-1841.39
0.222879	0.252625	-1844.17
0.207983	0.201657	-1841.39
0.169529	0.130434	-1844.17
0.161589	0.0739895	-1844.17
0.14898	0.0589526	-1841.39
0.115511	0.0875652	-1844.17
0.143783	0.137962	-1841.39
0.0745229	0.0865921	-1846.95
-0.0853228	-0.215354	-1841.39
-0.127041	-0.208672	-1841.39
-0.101527	-0.227421	-1841.39
0.0481681	-0.0175437	-1846.95
0.354862	0.133583	-1841.39
-0.215853	-0.161346	-1921.39
-0.0566313	0.0227631	-1921.39
0.0278386	0.0657607	-1921.39
0.0863359	0.101866	-1921.39
0.203027	0.0275525	-1921.39
0.240226	0.00144381	-1921.39
0.254243	0.0144848	-1921.39
0.256784	0.114843	-1921.39
0.229622	0.125894	-1921.39
0.218733	0.10683	-1921.39
0.324255	0.0686502	-1921.39
0.346991	0.0586049	-1921.39
0.415966	0.0495443	-1921.39
0.340041	-0.0511173	-1921.39
0.265987	-0.0415603	-1921.39
0.279285	-0.176151	-1921.39
0.22806	-0.294393	-1921.39
0.186068	-0.335153	-1921.39
-0.207955	-0.219426	-2001.39
-0.165141	-0.158767	-2004.17
-0.117757	-0.0691669	-2004.17
-0.0605199	-0.174851	-2004.17
-0.137654	-0.267497	-2001.39
-0.199947	-0.0232147	-2001.39
0.0482206	0.00669933	-2001.39
0.127008	0.0244776	-2001.39
0.139908	0.0189311	-2004.17
0.197644	0.0751952	-2001.39
0.20514	0.135485	-2001.39
0.225894	0.145023	-2001.39
0.137873	0.148654	-2001.39
0.10181	0.19433	-2001.39
0.253179	0.105659	-2001.39
0.28223	-0.0106907	-2001.39
0.312494	-0.0946743	-2004.17
0.348159	0.0309252	-2001.39
0.365783	0.0351706	-2001.39
0.357963	0.148898	-2001.39
0.247293	-0.412609	-2001.39
0.202404	-0.0347116	-2001.39

## Sheet: Sheet2
0.388039	-0.129502	-81.39
0.369659	-0.128089	-81.39
0.40216	-0.361581	-161.39
0.311851	-0.330725	-161.39
0.372805	-0.213081	-244.17
0.396153	-0.190162	-241.39
0.40361	-0.256956	-244.17
0.40266	-0.257166	-321.39
0.318333	-0.131253	-409.73
0.327516	-0.166204	-401.39
0.354774	-0.146624	-404.17
0.358446	-0.220712	-481.39
0.408424	-0.163063	-481.39
0.295351	-0.317502	-481.39
0.318385	-0.315381	-481.39
0.26424	-0.0763353	-561.39
0.342954	-0.0316734	-561.39
0.364531	-0.0453484	-561.39
0.363379	-0.0621789	-564.17
0.346161	-0.0795381	-566.95
0.341307	-0.25008	-566.95
0.431195	-0.145578	-646.95
0.389567	-0.128572	-644.17
0.356774	-0.265601	-646.95
0.35279	-0.29304	-652.51
0.330518	-0.285141	-649.73
0.312195	-0.29106	-652.51
0.33787	-0.30503	-721.39
0.31991	-0.239764	-724.17
0.35334	-0.219215	-726.95
0.411854	-0.147627	-726.95
0.367423	-0.289305	-812.51
0.409189	-0.219668	-804.17
0.382125	-0.327131	-884.17
0.332552	-0.294441	-884.17
0.326555	-0.340728	-884.17
0.44027	-0.215182	-964.17
0.327687	-0.319333	-1041.39
0.208035	-0.381187	-2001.39
