# Supplementary material for: Spinal premotor interneurons controlling antagonistic muscles are spatially intermingled
Source: eLife. 2022 Dec 13;11:e81976. doi: 10.7554/eLife.81976 (PMC9844990; doi:10.7554/eLife.81976)
Supplement: Figure 12—figure supplement 5—source data 2. [file elife-81976-fig12-figsupp5-data2.xlsx]

## Sheet: Sheet1
-0.193174	-0.121268	-2790.27
0.141374	0.149005	-2787.49
0.102645	0.130831	-2784.71
0.2201	0.129973	-2784.71
0.204787	0.18242	-2787.49
0.21661	0.199262	-2784.71
0.375136	-0.139586	-2782.88
-0.117809	-0.130673	-2715.83
0.0722695	0.0351687	-2715.83
0.205279	0.00822205	-2715.83
0.333517	0.0250141	-2712.97
0.337006	-0.101678	-2708.66
-0.166696	-0.189187	-2630.27
-0.052117	-0.191979	-2627.49
0.0961006	0.170405	-2627.49
0.246774	0.105099	-2627.49
0.232408	0.137457	-2627.49
0.29462	-0.0439383	-2630.27
0.34511	-0.0893264	-2547.49
0.295854	-0.0420643	-2544.71
0.206429	-0.0203668	-2547.49
0.176416	0.055527	-2544.71
0.135179	0.105036	-2544.71
0.0945448	0.12731	-2550.27
0.0894298	0.0676996	-2547.49
-0.178852	-0.212039	-2547.49
-0.146055	-0.0956141	-2470.27
-0.103882	-0.143376	-2470.27
-0.0635736	-0.192442	-2464.71
0.12037	0.13138	-2467.49
0.187357	0.186603	-2467.49
0.213011	0.0864333	-2470.27
0.277919	0.0545238	-2470.27
0.20802	0.000340984	-2464.71
0.238032	-0.0374484	-2467.49
0.336869	-0.164318	-2464.71
0.1632	0.0186372	-2470.27
0.357863	-0.0342914	-2387.48
0.293358	-0.158654	-2387.49
0.34279	-0.231202	-2384.7
0.219673	-0.31886	-2387.49
0.0554124	-0.0656219	-2310.27
0.196144	-0.129928	-2307.49
0.346375	-0.28549	-2307.49
0.260887	-0.042854	-2310.27
0.299905	0.0391466	-2307.49
0.373144	0.0825426	-2307.49
0.218865	0.0966977	-2313.05
0.176579	0.0522219	-2307.49
0.175668	0.00880787	-2307.49
0.181826	0.124125	-2310.27
0.166001	0.19894	-2310.27
0.11643	0.149074	-2310.27
0.245241	0.109522	-2307.49
-0.148292	-0.0696009	-2235.83
0.144882	0.0999683	-2230.27
0.132175	0.117153	-2233.05
0.181578	0.111085	-2230.27
0.28858	0.20618	-2227.48
0.284517	-0.0334191	-2230.26
0.33941	-0.0412837	-2227.48
0.332103	-0.177639	-2227.48
0.346163	-0.197442	-2230.26
-0.130747	-0.220672	-2166.95
-0.113933	-0.222001	-2166.95
-0.15493	0.0258314	-2166.95
0.2358	0.059031	-2166.95
0.219191	0.0476095	-2166.95
0.102464	0.179827	-2169.73
0.276751	-0.000565755	-2166.95
0.280134	-0.129128	-2164.17
0.319315	0.0185461	-2166.95
0.349671	0.109679	-2166.95
-0.19431	-0.228296	-2070.27
-0.171498	-0.235349	-2070.27
-0.092009	-0.0538208	-2067.49
0.00446256	0.0382639	-2064.71
0.118098	0.0820971	-2067.49
0.134626	0.0658039	-2070.27
0.171079	0.0225527	-2064.71
0.275117	-0.166451	-2067.49
0.372968	-0.301005	-2067.49
0.284071	-0.390783	-2067.49
0.227251	0.144709	-2070.27
0.182865	0.126637	-2067.49
0.16635	0.128186	-2070.27
0.163618	0.149652	-2064.71
0.142705	0.191387	-2064.71
0.143003	0.228793	-2067.49
0.0902702	0.193441	-2067.49
0.0666574	0.236531	-2070.27
-0.144564	-0.252644	-1987.49
-0.00359834	-0.0678485	-1987.49
0.058409	0.00994378	-1987.49
0.0513132	0.167448	-1987.49
0.0827882	0.22352	-1990.27
0.0189313	0.246465	-1984.71
0.0566788	0.274719	-1987.49
0.15621	0.263745	-1987.49
0.216917	0.16718	-1990.27
0.255078	0.156099	-1990.27
0.260945	0.104244	-1987.49
0.206602	0.10335	-1987.49
0.156906	0.104334	-1987.49
0.14082	0.073735	-1984.71
0.206288	0.0096732	-1987.49
0.239996	-0.0342102	-1984.71
0.309052	0.0669174	-1990.27
0.322619	0.084542	-1987.49
0.308347	0.112841	-1990.27
0.350184	-0.0432844	-1987.49
0.326095	-0.125674	-1987.49
0.289648	-0.262565	-1984.71
0.208019	-0.30932	-1987.49
0.280047	-0.0894594	-1987.49
-0.144224	-0.218095	-1907.49
-0.10353	-0.197684	-1907.49
0.115175	0.0102474	-1907.49
0.0712211	0.221749	-1907.49
0.18666	0.217878	-1910.27
0.210629	0.23346	-1904.71
0.192032	0.189918	-1910.27
0.207637	0.150479	-1910.27
0.30712	0.16222	-1910.27
0.245599	0.0380595	-1907.49
0.186056	0.0112216	-1910.27
0.177475	0.0538441	-1907.49
0.190216	0.0819879	-1907.49
0.219666	-0.184235	-1907.49
0.380152	0.00419807	-1904.71
0.122064	0.14129	-1904.71
-0.162925	-0.138647	-1824.71
0.0398519	0.0260394	-1827.49
0.0905416	0.187184	-1827.49
0.218394	-0.0279368	-1827.49
0.176147	-0.0637805	-1830.27
0.24372	-0.0369041	-1827.49
0.273586	-0.0359855	-1827.49
0.322618	-0.073661	-1827.49
0.349181	-0.0878953	-1830.27
0.278807	-0.00589999	-1824.71
-0.131726	-0.263103	-1747.49
-0.0713027	-0.125446	-1744.71
-0.119772	-0.0758595	-1744.71
-0.0959692	0.201302	-1747.49
0.0859136	0.153221	-1747.49
0.106159	0.198849	-1747.49
0.0953519	0.208461	-1750.27
0.152369	0.171368	-1747.49
0.155137	0.0975705	-1750.27
0.140551	0.0994928	-1744.71
0.142803	0.0923297	-1747.49
0.0437477	0.0276232	-1747.49
0.177527	-0.138529	-1750.27
0.264556	-0.221366	-1747.49
0.335522	0.0334961	-1750.27
0.332034	0.120835	-1747.49
0.260587	0.00903247	-1747.49
0.240331	-0.0536689	-1747.49
0.251728	0.104748	-1744.71
0.256391	0.12255	-1747.49
0.265058	0.168282	-1747.49
0.218613	0.143855	-1750.27
0.207802	0.133394	-1747.49
0.202739	0.0114852	-1744.71
0.317685	-0.255572	-1750.27
-0.154893	-0.242339	-1667.49
-0.135193	-0.248916	-1667.49
-0.00694157	-0.0526317	-1667.49
0.132925	0.11978	-1667.49
0.124384	0.146787	-1670.27
0.0329736	0.237849	-1667.49
0.155603	0.182979	-1670.27
0.255006	0.173158	-1667.49
0.263312	0.148835	-1667.49
0.247945	0.161185	-1667.49
0.305082	0.093743	-1670.27
0.210511	-0.0370616	-1667.49
0.256412	-0.09657	-1670.27
0.328918	-0.0402476	-1670.27
-0.0902666	-0.147885	-1581.93
-0.107304	-0.228161	-1587.49
0.115187	0.115488	-1587.49
0.139144	0.142367	-1584.71
0.119815	0.226177	-1587.49
0.161874	0.137599	-1587.49
0.212754	0.142163	-1587.49
0.217073	0.212209	-1587.49
0.243893	0.182597	-1587.49
0.266133	0.190857	-1587.49
0.253664	0.115959	-1587.49
0.322463	0.129513	-1587.49
0.347884	0.129342	-1587.49
0.34502	0.108338	-1587.49
0.340708	0.0329743	-1590.27
0.310597	-0.0183651	-1590.27
0.297652	-0.00439675	-1587.49
0.274383	-0.00597659	-1587.49
0.238669	-0.0083395	-1587.49
0.205267	0.0111703	-1587.49
0.218628	-0.283784	-1587.49
-0.107017	-0.179507	-1508.34
0.124097	0.0167761	-1508.51
0.188405	-0.0161171	-1508.07
0.149593	-0.0617596	-1509.4
0.275278	-0.0550775	-1507.69
0.266599	-0.0787929	-1510.39
0.370348	-0.0323994	-1508.81
0.254564	0.0922223	-1509.35
0.257666	0.173504	-1507.35
0.239792	0.15562	-1505.16
0.232762	0.212606	-1504.21
0.249419	0.234996	-1508.98
0.218144	0.138619	-1508.18
0.231887	0.0797532	-1507.08
0.18061	0.0815746	-1507.17
0.159324	0.145011	-1508.09
0.129604	0.206819	-1505.33
0.104511	0.192148	-1508.02
0.0757803	0.193801	-1507.85
0.107998	0.114577	-1506.22
0.195064	0.079358	-1508.62
0.356816	0.0231057	-1512.76
-0.139525	-0.20706	-1427.49
-0.0811248	-0.205448	-1424.71
-0.0347841	-0.166961	-1424.71
-0.0826565	-0.0138822	-1424.71
0.076246	0.14284	-1427.49
0.0760887	0.192415	-1424.71
0.0918721	0.169431	-1427.49
0.175146	0.144306	-1427.49
0.20411	0.136554	-1427.49
0.219181	0.110913	-1424.71
0.18494	0.0726444	-1427.49
0.123417	0.0771864	-1427.49
0.111382	0.0642828	-1427.49
0.199722	0.190612	-1424.71
0.206993	0.202041	-1427.49
0.272963	0.113447	-1430.27
0.309143	0.0872102	-1427.49
0.29225	0.090596	-1427.49
0.29118	0.023318	-1427.49
0.20985	0.00980167	-1430.27
0.239735	-0.251154	-1427.49
0.242795	-0.280758	-1427.49
0.31336	-0.246635	-1430.27
-0.245505	0.13238	-1344.71
0.00568607	0.0697854	-1350.27
0.0938084	0.109898	-1350.27
0.0951218	0.198064	-1347.49
0.137666	0.138615	-1350.27
0.166757	0.0970529	-1350.27
0.178223	0.105086	-1350.27
0.182709	0.134311	-1347.49
0.213951	0.124553	-1347.49
0.190291	0.159751	-1347.49
0.256792	0.122576	-1350.27
0.260815	0.132174	-1350.27
0.268825	0.144446	-1350.27
0.280676	0.131001	-1350.27
0.326809	0.145369	-1347.49
0.334109	0.116106	-1347.49
0.376641	-0.0495234	-1350.27
0.227726	0.00233583	-1347.49
0.205731	-0.0290239	-1347.49
0.183261	-0.0559082	-1347.49
0.132517	0.033032	-1347.49
0.270418	0.0941014	-1347.49
0.29739	-0.205635	-1267.49
0.253208	-0.0549263	-1267.49
0.181991	-0.0304437	-1267.49
0.165796	0.00319998	-1267.49
0.0676185	-0.0202023	-1267.49
0.0705533	0.113161	-1270.27
0.208941	0.136502	-1270.27
0.104933	0.157829	-1267.49
0.220793	0.126492	-1267.49
0.219865	0.111071	-1267.49
0.217288	0.0905495	-1264.71
0.242245	0.0852209	-1267.49
0.261404	0.1272	-1267.49
0.267281	0.142785	-1264.71
0.237206	0.127578	-1267.49
-0.0588357	-0.172018	-1264.71
-0.181126	-0.194888	-1267.49
-0.218929	-0.259879	-1267.49
0.322653	0.227837	-1187.49
0.290463	0.224079	-1187.49
0.280872	0.183226	-1187.49
0.270556	0.254907	-1187.49
0.260846	0.253237	-1184.71
0.176426	0.206896	-1190.27
0.181061	0.169525	-1187.49
0.21715	0.102963	-1187.49
0.202688	0.126853	-1187.49
0.13639	0.111291	-1187.49
0.0843847	0.189321	-1190.27
0.101776	0.187772	-1187.49
0.120124	0.0456947	-1187.49
0.00567812	0.0384802	-1187.49
-0.129816	-0.199468	-1187.49
-0.158022	-0.186419	-1187.49
0.191909	0.0586691	-1187.49
0.331279	-0.0861169	-1190.27
0.282822	-0.290586	-1187.49
0.275133	0.155342	-1190.27
0.335692	0.101384	-1190.27
-0.203331	-0.180742	-1110.27
-0.0670687	-0.117433	-1101.93
-0.0693517	-0.149906	-1110.27
0.0278407	-0.015536	-1110.27
0.0549557	-0.0104649	-1104.71
0.102645	0.0353383	-1104.71
0.0887349	0.126344	-1110.27
0.0652477	0.156984	-1113.05
0.0538645	0.174342	-1110.27
0.118011	0.115949	-1107.49
0.15659	0.105719	-1107.49
0.187366	0.151052	-1110.27
0.233331	0.142631	-1110.27
0.202393	0.103859	-1110.27
0.242965	0.101714	-1107.49
0.275522	0.0993729	-1104.71
0.244408	0.0618767	-1110.27
0.272277	0.014662	-1110.27
0.289763	-0.0207118	-1110.27
0.239341	-0.0814827	-1107.49
0.180161	-0.0696557	-1104.71
0.167226	-0.0106579	-1110.27
0.169301	0.0522942	-1107.49
0.244909	-0.351646	-1107.49
0.104938	0.0164612	-1027.49
0.0293436	0.0140428	-1027.49
-0.0785372	0.0470617	-1021.93
-0.0729744	-0.193235	-1021.93
0.142324	0.0726714	-1027.49
0.201587	0.114098	-1027.49
0.220734	0.118862	-1027.49
0.148822	0.232274	-1027.49
0.171125	0.214079	-1024.71
0.24081	0.258128	-1027.49
0.273195	0.210037	-1027.49
0.251803	0.182568	-1027.49
0.336469	0.15882	-1027.49
0.26302	0.0550987	-1027.49
0.258681	-0.305321	-1027.49
-0.303053	0.240518	-944.704
-0.0771105	-0.137485	-944.707
0.0772129	0.156023	-947.493
0.0411806	0.17993	-944.712
0.082364	0.187825	-947.493
0.0999905	0.201268	-947.494
0.115224	0.214044	-947.494
0.132638	0.201825	-947.495
0.115604	0.188348	-947.494
0.186059	0.108133	-947.495
0.23232	0.0509526	-947.496
0.27709	0.116413	-950.278
0.290335	0.179249	-947.498
0.278602	0.20238	-947.498
0.261812	0.272332	-947.498
0.215205	0.186115	-944.716
0.245672	0.0983364	-947.497
0.213985	-0.00478275	-944.715
0.184428	0.0183637	-947.495
0.147574	-0.00339164	-947.494
0.172127	-0.10848	-947.494
0.271131	-0.156796	-947.496
0.23908	-0.316732	-944.714
-0.132185	-0.151964	-867.489
-0.143565	0.120731	-864.709
0.0802941	0.0993461	-867.489
0.0864339	0.0480413	-867.489
0.13773	0.00870343	-867.489
0.192664	-0.0331938	-867.489
0.149917	0.0631768	-867.489
0.180431	0.120818	-867.489
0.17332	0.101681	-867.489
0.188257	0.181502	-867.489
0.200153	0.208104	-864.71
0.138194	0.170314	-867.489
0.247627	0.234328	-870.269
0.287002	0.166828	-867.49
0.321741	0.129782	-867.49
0.282347	0.0971959	-867.489
0.319344	0.0275843	-870.269
0.332822	-0.148501	-867.489
0.244434	-0.185599	-867.489
0.231017	-0.131094	-867.489
0.286534	-0.350137	-867.489
0.208329	0.142283	-867.489
0.104744	0.152322	-867.489
-0.0488798	-0.000553767	-867.489
0.265981	0.1338	-867.49
-0.169308	0.11643	-787.49
-0.0642771	0.0245892	-787.49
0.0195892	-0.0345761	-787.49
-0.121306	-0.138507	-784.71
-0.143034	-0.246443	-787.49
0.154975	-0.0143602	-790.27
0.167851	-0.115937	-790.27
0.199518	-0.318337	-787.49
0.295376	-0.209707	-787.491
0.271001	-0.0685551	-787.491
0.246947	0.0114084	-790.271
0.262763	0.0807017	-790.271
0.167714	0.0954867	-787.49
0.145015	0.131538	-790.27
0.0930579	0.190637	-787.49
0.0858701	0.20932	-787.49
0.290393	0.227211	-787.491
0.251577	0.225646	-787.491
0.143525	0.0232279	-790.27
0.150006	0.200103	-787.49
0.150727	0.261084	-790.271
-0.081503	-0.0994002	-704.71
0.0442844	0.0170921	-707.49
0.0631611	0.11349	-710.27
0.0850478	0.211643	-707.49
0.194748	0.16569	-710.27
0.235692	0.252803	-710.27
0.221246	0.16635	-704.71
0.247779	0.152172	-704.71
0.246901	0.113154	-710.27
0.208543	0.124391	-707.49
0.193083	0.105611	-707.49
0.236824	-0.0119557	-704.71
0.199496	-0.0485085	-707.49
0.285324	-0.290955	-704.71
-0.0657815	-0.0476672	-707.49
-0.164894	0.00995741	-633.05
-0.065448	-0.146784	-627.49
0.046904	0.011741	-630.27
0.0768866	0.137704	-630.27
0.0432184	0.164918	-630.27
0.0757729	0.185875	-627.49
0.111426	0.169956	-630.27
0.0897889	0.106878	-630.27
0.147103	0.0531596	-627.49
0.175819	0.0679829	-627.49
0.202749	0.06206	-630.27
0.224844	0.00838382	-630.27
0.184106	-0.0517125	-627.49
0.214609	-0.151611	-627.49
0.264522	-0.192223	-627.49
0.3237	-0.00826219	-627.49
0.268646	0.00220182	-627.49
0.253871	-0.0749358	-624.71
0.30167	0.0968827	-627.49
0.254465	0.11301	-630.27
0.241419	0.12371	-627.49
0.217906	0.125705	-630.27
0.214929	0.134407	-630.27
0.30171	-0.238962	-627.49
0.295363	-0.351096	-627.49
-0.182847	-0.231434	-550.27
-0.181948	-0.243867	-544.71
0.0764452	0.0429368	-550.27
0.128908	0.0603843	-550.27
0.242528	-0.225708	-547.49
0.280617	-0.238259	-544.71
0.292687	-0.115957	-544.71
0.28217	0.156325	-544.71
0.263868	0.155077	-547.49
0.31396	0.212466	-550.27
0.256167	0.201443	-550.27
0.215104	0.191732	-550.27
0.167956	0.18394	-550.27
0.203314	0.144182	-553.05
0.173734	0.109337	-550.27
0.152384	0.113873	-553.05
0.147873	0.160687	-547.49
0.119676	0.167142	-550.27
0.0912221	0.0976323	-550.27
0.0265859	0.084025	-550.27
0.0879224	0.145994	-467.49
0.0750684	0.111563	-467.49
-0.0248182	0.0655599	-461.93
-0.0105848	-0.0754229	-464.71
-0.143285	-0.072403	-461.93
-0.147409	-0.177456	-464.71
0.162888	0.0763262	-467.49
0.157307	0.117215	-467.49
0.143129	0.123254	-464.71
0.143678	0.179246	-467.49
0.146384	0.223842	-467.49
0.201164	0.16062	-467.49
0.196969	0.137937	-467.49
0.199801	0.112377	-467.49
0.214247	0.166551	-467.49
0.243984	0.169669	-467.49
0.264718	0.18836	-464.71
0.250029	0.0710488	-467.49
0.260263	-0.00572764	-467.49
0.220988	-0.0469641	-464.71
0.157921	-0.0187292	-467.49
0.221716	0.0540553	-467.49
0.120317	-0.0676111	-461.93
0.0841863	0.175202	-467.49
0.241693	0.236888	-467.49
0.267777	-0.0246665	-387.49
0.333739	0.0448265	-384.71
0.235471	-0.203174	-387.49
0.22616	-0.251393	-384.71
0.212202	0.0971761	-387.49
0.276597	0.0913042	-384.71
0.243885	0.167802	-381.93
0.228454	0.162958	-381.93
0.209495	0.160949	-387.49
0.200451	0.178325	-387.49
0.124505	0.214128	-384.71
0.108202	0.237726	-381.93
0.0908219	0.0967203	-387.49
0.0531635	0.0778113	-384.71
0.138997	0.0313554	-387.49
0.183147	0.0445253	-387.49
0.202822	0.114368	-381.93
-0.153396	-0.158437	-381.93
0.191148	-0.0838464	-307.49
0.281513	-0.109455	-307.49
0.356282	-0.0796438	-310.27
-0.148324	-0.187096	-304.71
-0.131405	-0.26076	-304.71
0.103662	0.0346001	-307.49
0.157421	0.0188383	-307.49
0.195507	0.14426	-307.49
0.213918	0.145221	-307.49
0.229139	0.158405	-304.71
0.230064	0.115406	-307.49
0.264855	0.0987094	-307.49
0.284038	0.0818488	-307.49
0.259092	0.146733	-307.49
0.272493	0.176961	-307.49
0.291803	0.195664	-307.49
0.226261	0.207328	-307.49
0.127003	0.204745	-307.49
0.136745	0.193861	-304.71
0.139445	0.0983559	-307.49
0.153492	0.104214	-307.49
0.0952288	0.204444	-307.49
-0.144247	-0.215598	-227.49
-0.0525963	0.0188655	-224.71
0.0908002	0.0815286	-230.27
0.083567	0.0103373	-230.27
0.12252	-0.0678005	-224.71
0.155139	0.0388992	-227.49
0.206133	0.0774031	-227.49
0.21562	0.128509	-227.49
0.225236	0.142436	-227.49
0.206292	0.145405	-230.27
0.191923	0.142887	-227.49
0.171614	0.12748	-227.49
0.142683	0.173256	-224.71
0.115534	0.192643	-224.71
0.095914	0.162608	-227.49
0.0705448	0.19897	-230.27
0.176241	0.249888	-224.71
0.196745	0.178281	-230.27
0.220552	0.20065	-224.71
0.248955	0.199092	-224.71
0.251559	0.282927	-224.71
0.306768	0.180089	-224.71
0.271039	0.122716	-227.49
0.312623	0.000527514	-230.27
0.240755	-0.296763	-227.49
0.146135	0.119929	-227.49
0.0904486	0.0661592	-147.49
0.0874522	0.0768158	-147.49
0.108435	0.0410819	-144.71
0.155645	0.0149405	-147.49
0.213397	0.071961	-147.49
0.168965	0.0471682	-147.49
0.17742	0.143107	-147.49
0.241329	0.197424	-145.394
0.239513	0.215562	-143.465
0.20628	0.25817	-147.165
0.251682	0.291163	-143.277
0.30008	0.117414	-146.824
0.100819	0.174182	-147.49
0.092852	0.216056	-143.934
0.0760394	0.207926	-147.656
0.310189	-0.331164	-143.71
-0.19488	0.0113078	-148.667
0.0722681	0.124632	-147.49
0.230122	0.150109	-147.49
0.165904	-0.041903	-144.71
0.110377	0.0775137	-67.49
0.125076	0.0770463	-67.49
0.146704	0.0341647	-67.49
0.139449	0.0492848	-64.71
0.0855714	0.196758	-64.71
0.081533	0.251681	-67.49
0.213797	0.245557	-67.49
0.208267	0.2208	-67.49
0.204363	0.198549	-67.49
0.230611	0.199632	-67.49
0.224446	0.185764	-67.49
0.205187	0.119249	-67.49
0.287813	-0.0555856	-67.49
0.343794	0.139135	-67.49
0.273024	0.0563589	-67.49
0.180407	0.0286178	-67.49
-0.135087	-0.143086	9.73
0.0939883	0.00849422	9.73
0.0945262	0.0853766	15.29
0.129231	0.109275	12.51
0.177603	0.177646	18.07
0.245863	0.128544	15.29
0.250465	0.118956	12.51
0.226464	0.102407	12.51
0.229101	0.0856083	12.51
0.274911	-0.104402	12.51
0.31757	-0.0111695	12.51
0.317204	0.0280427	12.51
0.207991	0.00998692	12.51
-0.188564	0.196197	98.07
-0.133505	-0.150367	95.29
0.217116	0.0691946	89.73
0.220836	0.0864529	89.73
0.20939	0.0952065	92.51
0.284988	0.101506	92.51
0.356015	0.0250129	92.51
0.324758	-0.0150342	95.29
0.403411	-0.0870897	92.51
0.22242	0.209242	95.29
-0.169975	-0.0884236	175.29
-0.116012	-0.159191	172.51
-0.0364012	-0.12098	175.29
-0.0354124	0.100425	172.51
0.0603831	0.0841812	175.29
0.248945	-0.0731003	172.51
0.221764	-0.00894542	169.73
0.174339	0.0622409	175.29
0.215589	0.106398	172.51
0.23512	0.0872281	172.51
0.261812	0.112141	175.29
0.0943964	0.198284	172.51
0.174304	0.28759	172.51
0.255323	0.207967	175.29
0.256251	0.226947	169.73
0.0848909	0.214034	252.51
0.119116	0.172689	252.51
0.103494	0.153987	249.73
0.145208	0.237384	255.29
0.232624	0.0947886	255.29
0.271851	0.0703093	249.73
0.240792	0.0294959	252.51
0.232339	0.0202605	252.51
0.185579	0.0351312	252.51
0.15016	0.0175215	249.73
0.133845	0.0295788	252.51
0.251135	-0.103469	252.51
0.37693	-0.0913366	252.51
0.338852	-0.133378	252.51
-0.155963	-0.272375	332.51
-0.115496	-0.235314	329.73
0.108312	0.194419	329.73
0.109793	0.210171	329.73
0.0928917	0.181237	332.51
0.126252	0.0583793	329.73
0.121441	0.11354	332.51
0.157627	0.00566629	332.51
0.204995	0.0125317	332.51
0.218691	0.0659341	332.51
0.197733	0.1417	329.73
0.264042	0.152223	332.51
0.271754	0.191322	332.51
0.340383	0.0546612	329.73
0.31435	-0.0970487	329.73
0.261288	-0.310241	329.73
0.214902	0.168808	329.73
0.0745078	0.0218697	409.73
0.0728342	0.157988	412.51
0.109428	0.0311862	415.29
0.0956639	0.0887569	412.51
0.143395	0.0486554	412.51
0.164255	0.0540388	412.51
0.186602	0.0784679	412.51
0.208211	0.0772691	412.51
0.222921	0.0845386	409.73
0.262574	0.101402	412.51
0.294943	0.101172	415.29
0.316015	0.0193886	412.51
0.343531	0.057989	412.51
0.336569	-0.188755	412.51
0.375966	-0.306422	415.29
0.226113	-0.320126	415.29
0.254192	-0.154596	412.51
0.251368	-0.0709052	412.51
0.314826	-0.0859568	412.51
-0.120277	-0.245682	511.97
-0.19558	0.0106068	492.51
0.146183	0.183839	506.41
0.125171	0.155752	506.41
0.104501	0.173148	492.51
0.181768	0.143991	492.51
0.208821	0.257009	492.51
0.249835	0.291158	495.29
0.238904	0.012877	509.19
0.253017	0.0257798	511.97
0.303922	0.1225	492.51
0.242797	0.198871	492.51
0.242321	0.21647	492.51
0.229891	0.151577	495.29
0.216173	0.0757224	492.51
0.240644	0.0762659	511.97
0.214241	0.042355	509.19
0.23745	-0.14385	511.97
0.244328	-0.20502	511.97
0.327592	-0.124949	511.97
0.310295	-0.331399	495.29
0.262602	-0.354515	511.97
0.155756	-0.097857	511.97
0.159582	0.012378	492.51
0.173586	0.0510209	492.51
0.1381	0.0667283	509.19
0.110371	0.0450605	495.29
0.0926835	0.0774511	492.51
0.129327	0.0676533	509.19
0.106345	0.092473	566.95
0.121097	0.257117	569.73
0.162404	0.258946	566.95
0.190133	0.208733	572.51
0.222593	0.179498	572.51
0.168581	0.0423154	572.51
0.188893	0.0210537	569.73
0.209024	0.0187021	572.51
0.178453	-0.0255348	569.73
0.329349	0.103433	566.95
0.345429	0.234429	569.73
0.0744644	0.0419447	566.95
0.0439752	0.104178	652.509
0.0573324	0.00282011	655.289
0.249567	-0.0308685	652.509
0.388378	0.0577886	655.289
0.364378	0.08498	652.509
0.321377	0.278299	649.728
0.239343	0.207002	652.508
0.211513	0.170976	652.508
0.15315	0.171435	649.728
0.319522	0.152282	655.288
0.155514	0.062251	735.29
0.139516	0.105178	729.73
0.113163	0.137225	732.51
0.142331	0.185584	732.51
0.25837	0.115721	732.51
0.28736	0.0149196	732.51
0.32323	-0.155292	735.29
0.263237	-0.272722	735.29
0.229647	-0.294999	738.07
0.24384	0.212477	729.73
0.114665	-0.0073747	732.51
0.0430408	0.0100151	812.51
0.0667709	0.223246	812.51
0.165054	0.170886	815.29
0.189734	0.129419	809.73
0.237898	0.180222	812.51
0.286125	0.0587378	815.29
0.322727	-0.0546632	812.51
0.0181289	0.155682	809.73
0.319463	0.0420179	815.29
-0.0987158	-0.112834	895.29
0.0900321	-0.0248024	895.29
0.116971	0.0592589	889.73
0.0995347	0.133464	889.73
0.16585	0.0949045	892.51
0.192902	0.10918	889.73
0.200042	0.0602542	892.51
0.25399	0.100948	892.51
0.192725	-0.0577247	895.29
0.195319	-0.10686	892.51
0.216664	-0.106854	892.51
0.139493	0.131906	972.51
0.194073	0.11321	972.51
0.225234	0.0331003	972.51
0.24305	0.0172968	975.29
0.29409	0.014334	972.51
0.336424	0.0244348	972.51
0.286901	-0.0581327	972.51
0.245127	0.135536	972.51
-0.16263	-0.085184	1052.51
0.0861767	0.181665	1052.51
0.0933976	0.215403	1052.51
0.0931057	0.0867775	1052.51
0.145473	0.0840506	1052.51
0.19372	0.114344	1052.51
0.272878	0.0700131	1055.29
0.250052	-0.0431321	1055.29
0.0732725	0.0366973	1132.51
0.227772	-0.214639	1135.29
0.21085	-0.231508	1135.29
0.329172	0.0129509	1135.29
0.27345	0.0106694	1138.07
0.283778	0.0744115	1135.29
0.306559	0.180516	1132.51
0.1931	0.120085	1132.51
0.180758	0.155666	1132.51
0.145472	0.152634	1132.51
0.10712	0.22221	1135.29
0.191581	0.222598	1135.29
0.186683	-0.0518208	1212.51
0.184497	-0.0830586	1215.29
0.163615	-0.0518464	1212.51
0.131238	0.13358	1212.51
0.0854122	0.177549	1215.29
0.148779	0.143247	1212.51
0.184158	0.139768	1215.29
0.189056	0.237285	1215.29
0.257066	0.189353	1215.29
0.345666	0.0434148	1212.51
0.363467	0.0138606	1212.51
0.329044	0.0707046	1212.51
0.299992	0.0553712	1289.73
0.286452	0.0218855	1292.51
0.231107	-0.18978	1292.51
0.144388	-0.0707005	1292.51
0.0494032	0.0404329	1295.29
0.143889	0.097708	1292.51
0.211546	0.133153	1289.73
0.259397	0.159931	1292.51
0.231084	0.211435	1292.51
0.0864674	0.200802	1292.51
0.0774691	0.239005	1289.73
0.357959	0.0332692	1289.73

## Sheet: Sheet2
0.397407	-0.0267169	-1427.49
0.362823	-0.0308458	-1267.49
0.365524	-0.064096	-1267.49
0.351239	-0.063457	-1190.27
0.376265	-0.0355129	-1190.27
0.378836	0.00191365	-1190.27
0.331626	0.0202052	-1027.49
0.344494	-0.00776053	-1027.49
0.367937	0.0166851	-1027.49
0.384268	-0.14237	-790.271
0.390054	-0.0474768	-707.49
0.362469	-0.0323641	-707.49
0.343318	-0.215214	-710.27
0.364886	-0.233594	-707.49
0.411332	-0.143435	-627.49
0.424255	-0.199423	-627.49
0.358191	-0.191006	-630.27
0.367997	-0.0700718	-470.27
0.351818	-0.0945039	-467.49
0.290876	-0.224792	-470.27
0.361599	-0.159737	-227.49
0.33685	-0.184483	92.51
