# Supplementary material for: Spinal premotor interneurons controlling antagonistic muscles are spatially intermingled
Source: eLife. 2022 Dec 13;11:e81976. doi: 10.7554/eLife.81976 (PMC9844990; doi:10.7554/eLife.81976)
Supplement: Figure 12—figure supplement 5—source data 3. [file elife-81976-fig12-figsupp5-data3.xlsx]

## Sheet: Sheet1
-0.0705057	-0.30453	1990.27
-0.399878	-0.0225879	1987.49
0.205393	-0.101868	1993.05
0.349031	-0.145854	1993.05
0.395398	-0.0629996	1995.83
0.39649	0.0165681	1995.83
0.232213	0.0634605	1990.27
0.167045	0.308718	1990.27
0.0573637	0.305859	1990.27
0.02763	0.180234	1990.27
-0.272996	-0.337892	1910.27
-0.229619	-0.347542	1910.27
-0.267702	-0.267343	1910.27
-0.129231	-0.110917	1910.27
-0.0858831	-0.104165	1910.27
-0.0894498	0.0531057	1910.27
0.237536	0.195637	1910.27
0.261478	0.0888139	1907.49
0.334578	0.0318619	1910.27
0.31481	-0.3317	1910.27
-0.181551	-0.218216	1833.05
-0.0816029	-0.259966	1830.27
-0.141793	-0.122024	1830.27
-0.214431	-0.142225	1830.27
-0.318989	-0.188974	1830.27
-0.325945	-0.0158601	1833.05
-0.295831	0.21576	1830.27
-0.185297	0.235494	1830.27
0.173682	0.127126	1833.05
0.056876	0.109698	1830.27
0.204577	0.23205	1830.27
0.191047	0.0838517	1830.27
0.18816	0.0173985	1830.27
0.2459	-0.11562	1833.05
0.204479	-0.281927	1833.05
-0.122421	-0.19691	1750.27
-0.148539	-0.247156	1747.49
-0.22529	-0.0292595	1750.27
-0.178646	0.189385	1747.49
0.0187153	0.132057	1747.49
0.127447	0.147168	1747.49
0.213611	0.12197	1747.49
0.211472	0.181238	1753.05
0.291248	-0.0536471	1747.49
0.35449	0.00132692	1750.27
0.366244	0.0391777	1747.49
0.396408	-0.142375	1750.27
0.379395	-0.259942	1747.49
0.299748	-0.355929	1747.49
-0.182819	-0.0956753	1670.27
-0.312797	0.297706	1670.27
0.168072	0.298522	1670.27
0.227663	0.221977	1670.27
0.284732	0.226896	1670.27
0.141417	0.146514	1670.27
0.149721	-0.0313416	1670.27
0.318597	-0.0313527	1670.27
0.321355	-0.122162	1670.27
0.296801	-0.195484	1670.27
-0.283483	-0.0522185	1593.05
-0.163098	-0.228547	1593.05
-0.23945	-0.335506	1593.05
0.179059	-0.236316	1593.05
0.2811	-0.12781	1593.05
0.306703	-0.240077	1593.05
0.366858	-0.203738	1595.83
0.286242	0.0634116	1593.05
0.323731	0.0844514	1593.05
0.261714	0.170412	1593.05
0.184053	0.144044	1593.05
0.150934	0.118989	1593.05
0.204521	0.102749	1593.05
0.0413822	0.114919	1593.05
0.251052	0.203238	1593.05
0.254961	0.207714	1513.05
0.282651	0.230099	1510.27
0.358374	0.129135	1513.05
0.378115	0.0677601	1513.05
0.320572	0.0621626	1513.05
0.347317	-0.247192	1513.05
0.122949	0.163577	1510.27
-0.0443729	0.131669	1510.27
0.13358	0.0540665	1510.27
-0.0697732	-0.145145	1513.05
-0.208393	-0.321553	1513.05
-0.248615	-0.276961	1513.05
-0.220907	-0.138411	1430.27
-0.0803983	-0.274052	1433.05
0.0522433	0.049656	1430.27
0.235409	0.0364927	1433.05
0.308837	-0.0132448	1430.27
0.336221	-0.0064708	1430.27
0.370048	-0.128215	1430.27
0.290209	-0.140628	1430.27
0.189165	0.143142	1430.27
0.19979	0.18136	1433.05
0.207939	0.237914	1430.27
0.248076	0.202862	1430.27
0.28435	0.240973	1430.27
0.310148	0.215583	1430.27
-0.0917845	-0.214732	1350.27
-0.0981727	-0.261729	1353.05
-0.0349872	-0.242689	1350.27
-0.196049	-0.348099	1350.27
-0.257461	-0.0778532	1350.27
0.228867	0.00361437	1350.27
0.204849	0.040196	1347.49
0.176224	0.0977871	1350.27
0.171895	0.162974	1350.27
0.240441	0.229931	1353.05
0.279471	0.258572	1350.27
0.334234	-0.278419	1353.05
-0.195625	-0.143855	1278.61
-0.18565	-0.00622047	1273.05
-0.215341	-0.0610107	1267.49
-0.136289	-0.139742	1273.05
-0.0947362	-0.212127	1264.71
-0.0765018	-0.174961	1264.71
-0.0943779	-0.107125	1267.49
-0.0084976	-0.0438981	1273.05
-0.064691	0.0246338	1273.05
-0.281382	0.168676	1273.05
0.0243059	0.142976	1270.27
0.234214	-0.0597973	1267.49
0.0971774	0.0576838	1273.05
0.134194	0.0977409	1270.27
0.0664044	0.140757	1270.27
0.113173	0.223952	1264.71
0.180635	0.168627	1264.71
0.190375	0.172947	1267.49
0.1832	0.138811	1267.49
0.187644	0.091736	1267.49
0.282748	0.0733822	1273.05
0.353045	0.0131717	1267.49
0.318903	-0.218798	1270.27
0.270038	-0.278918	1264.71
0.23826	-0.353813	1273.05
0.201408	0.178632	1193.05
0.225555	0.262703	1190.27
0.317616	0.0889732	1184.71
0.337579	0.0423721	1193.05
0.3762	-0.315325	1190.27
0.235306	-0.360534	1190.27
-0.164583	-0.193971	1195.83
0.126134	0.134557	1193.05
-0.0495522	0.00445387	1104.71
0.0360046	0.00941409	1107.49
-0.0832817	-0.225177	1113.05
-0.138172	-0.236492	1115.83
-0.183766	-0.116837	1107.49
-0.251905	-0.270848	1115.83
0.0569893	0.152632	1115.83
0.0860175	0.0976737	1104.71
0.15079	0.0915206	1104.71
0.18638	0.09346	1110.27
0.201607	0.106965	1113.05
0.211674	0.109829	1104.71
0.230753	0.0262092	1113.05
0.258637	0.0147313	1104.71
0.271735	-0.0154824	1107.49
0.22502	-0.109907	1107.49
0.292555	-0.370973	1115.83
0.309276	-0.315194	1110.27
0.232317	0.155571	1113.05
0.26002	0.197931	1110.27
-0.154535	-0.0149446	1038.61
-0.00596571	-0.0509903	1035.83
-0.0871216	0.121225	1035.83
-0.0812285	-0.228043	1035.83
-0.0860563	-0.309681	1033.05
0.119447	-0.198314	1038.61
0.277031	-0.187415	1035.83
0.296293	-0.299193	1038.61
0.202343	-0.299977	1033.05
0.393265	0.100925	1035.83
0.24565	0.0896998	1033.05
0.297599	0.059943	1035.83
0.303543	0.127204	1030.27
0.338856	0.173995	1035.83
0.25348	0.198908	1038.61
0.236167	0.234224	1038.61
0.231712	0.16619	1035.83
0.203343	0.0955506	1035.83
0.0732498	0.147803	1033.05
0.171913	0.30096	1033.05
0.30172	0.280551	1038.61
0.299461	-0.00843011	1033.05
0.281141	0.0136708	1033.05
-0.0982541	-0.268214	958.61
-0.08096	-0.202211	955.83
-0.0727336	-0.182701	958.61
-0.198504	0.112649	958.61
-0.167552	0.0309295	958.61
-0.274411	-0.244017	955.83
0.141635	0.0297279	955.83
0.156949	0.0711787	958.61
0.147665	0.111794	953.05
0.20492	0.114165	953.05
0.209291	0.14733	958.61
0.251576	0.152499	958.61
0.250758	0.1365	955.83
0.308949	0.0775173	958.61
0.12512	0.103716	953.05
0.0877709	0.209048	958.61
0.166544	0.177662	953.05
0.171662	0.225428	953.05
0.188076	0.233646	953.05
0.197414	0.200396	958.61
0.22168	0.257546	958.61
0.0739306	-0.00922868	958.61
0.204139	-0.382332	958.61
0.335197	-0.211217	958.61
0.363225	-0.190272	955.83
0.422336	-0.0944036	955.83
0.35958	-0.238943	958.61
0.12732	-0.216552	955.83
-0.135742	-0.294383	875.83
-0.146688	-0.238253	870.27
-0.180661	-0.160229	875.83
-0.0843283	-0.242284	873.05
-0.071403	-0.196509	878.61
-0.0304725	0.0342054	870.27
-0.00512357	0.0435969	870.27
0.052772	0.0732468	878.61
0.0651745	0.036612	878.61
0.0937168	0.0607399	870.27
0.181347	0.0931196	878.61
0.170795	0.109238	875.83
0.188977	0.123833	873.05
0.207361	0.116051	875.83
0.187731	0.155562	878.61
0.180056	0.192715	878.61
0.277277	0.148871	873.05
0.242342	0.135416	873.05
0.285672	0.0985341	875.83
0.279407	0.245089	875.83
0.266191	0.249465	878.61
0.239736	0.230457	875.83
0.240631	0.000330724	875.83
0.269387	-0.0466813	875.83
0.267132	-0.298665	878.61
0.409005	-0.315064	875.83
0.457821	0.00303669	875.83
0.192617	0.106581	873.05
-0.169108	-0.164564	798.61
-0.141612	-0.238664	793.05
-0.0820608	-0.256945	793.05
-0.0289754	-0.108855	795.83
0.0282743	0.0206912	798.61
0.138581	-0.00189463	795.83
0.21817	0.0742477	798.61
0.23758	0.0527676	795.83
0.216503	0.116743	798.61
0.123684	0.141524	798.61
0.12197	0.180691	798.61
0.107966	0.229319	798.61
0.231241	0.165304	795.83
0.24458	0.186804	798.61
0.302109	0.0605101	798.61
0.280799	0.0710283	798.61
0.346835	0.0285996	798.61
0.351774	-0.0306028	798.61
0.298322	-0.118137	795.83
0.277702	-0.0966166	798.61
0.312579	-0.165199	798.61
0.402836	-0.284786	798.61
0.374038	-0.284948	798.61
0.240334	-0.329512	798.61
0.234563	-0.34188	798.61
-0.15002	-0.176361	798.61
0.336945	0.218266	793.05
0.166518	0.184205	793.05
-0.136231	-0.195469	715.831
-0.256619	-0.0924248	713.052
-0.158133	-0.0154583	710.271
-0.144458	-0.149846	710.271
-0.109751	-0.149656	713.051
-0.00712454	-0.0766826	710.27
-0.0236409	0.0481875	707.49
-0.00972588	0.0863733	713.05
0.0392331	0.00956548	713.05
0.0472008	0.0182505	715.83
0.0458229	0.0462313	713.05
0.0347611	0.0358668	710.27
0.0622601	0.077509	715.829
0.124134	0.0274831	707.489
0.173122	0.052061	715.829
0.244025	0.0266924	715.828
0.291096	0.0789397	713.048
0.361609	0.0913888	715.827
0.332184	0.0876006	713.047
0.315332	0.20472	715.827
0.25305	0.15262	713.048
0.168151	0.219747	718.608
0.201631	-0.0349285	713.049
0.363955	-0.176824	713.047
0.253544	-0.380677	713.049
0.224927	-0.374365	713.049
0.219158	0.0738632	718.608
0.338465	-0.0756402	713.048
0.319684	-0.0916894	718.608
0.177716	0.192999	713.048
-0.32974	-0.0373548	627.49
-0.204865	-0.124253	624.71
-0.180572	-0.141199	630.27
-0.151424	-0.228736	633.05
-0.14216	-0.215515	635.83
-0.141518	-0.26328	633.05
-0.104857	-0.250483	627.49
-0.0839424	-0.276041	630.27
-0.0937504	-0.221805	627.49
-0.0722549	-0.183655	635.83
-0.0815769	-0.103341	627.49
-0.00505865	-0.0697043	624.71
-0.11069	-0.0242707	627.49
-0.187036	0.132839	635.83
-0.224803	0.259897	624.71
-0.145864	0.320154	630.27
0.127556	0.203834	633.05
0.207467	0.235347	633.05
0.264485	0.251888	627.49
0.271906	0.268364	633.05
0.187994	0.217816	633.05
0.173875	0.15988	627.49
0.115209	0.143147	627.49
0.157144	0.103316	633.05
0.328387	0.111098	635.83
0.325039	0.078087	635.83
0.388332	0.0569209	633.05
0.374758	0.118921	630.27
0.249351	0.12667	635.83
0.221052	0.0832538	633.05
0.250571	0.0674292	627.49
0.227882	0.00919606	633.05
0.27371	-0.0192894	627.49
0.145929	0.0640934	633.05
0.105014	0.0702959	633.05
0.111538	0.0362762	630.27
0.0353428	0.0256135	633.05
0.033645	-0.00284718	627.49
0.201476	-0.16502	630.27
0.134562	-0.300073	627.49
0.221697	-0.345783	630.27
0.265506	-0.237176	633.05
0.314201	-0.244525	633.05
0.410266	0.0105896	633.05
-0.172016	0.03685	558.61
-0.128116	0.117677	558.61
-0.0872232	0.0806095	555.83
-0.0400562	0.0081721	558.61
-0.0544446	-0.247052	558.61
-0.162602	-0.269514	558.61
-0.141771	-0.278432	558.61
0.233133	-0.241421	558.61
0.246824	-0.237067	558.61
0.0504781	-0.0431206	553.05
0.0139965	0.0366611	553.05
0.134711	0.0409124	553.05
0.142243	0.0675481	558.61
0.205972	0.0351495	555.83
0.216992	0.0535172	558.61
0.240298	0.0358769	555.83
0.237957	0.112058	558.61
0.246576	0.155907	558.61
0.198138	0.211861	558.61
0.134863	0.206112	555.83
0.111064	0.212913	558.61
0.198122	0.187653	555.83
0.319845	0.17386	558.61
0.328128	0.230037	555.83
0.296224	0.247546	555.83
0.218689	0.211379	555.83
0.327884	0.166914	558.61
0.343922	0.159065	555.83
0.380788	-0.149242	558.61
0.382019	-0.220945	558.61
0.303435	-0.348553	558.61
0.27784	-0.364155	558.61
0.0106856	0.0806312	475.83
-0.254393	0.21165	478.61
-0.323885	0.0595521	475.83
-0.156736	-0.212414	478.61
-0.0809856	-0.158384	478.61
-0.0938533	-0.242694	475.83
-0.0541162	-0.227039	478.61
-0.0425515	-0.228449	478.61
-0.00514519	-0.199924	478.61
-0.0889753	-0.293484	478.61
0.206707	-0.322019	478.61
0.290591	-0.393902	478.61
0.274575	-0.280169	478.61
0.329033	-0.298564	475.83
0.383449	-0.115651	478.61
0.403294	-0.104288	478.61
0.359205	0.038049	478.61
0.265993	0.0390941	478.61
0.294091	0.0121658	475.83
0.278006	-0.0409258	478.61
0.249725	-0.0721671	478.61
0.0360313	0.012101	478.61
0.0623217	0.130211	478.61
-0.0158992	-0.00442349	478.61
0.0924125	0.0791975	475.83
0.11231	0.0884009	478.61
0.125486	0.186251	478.61
0.149289	0.219173	475.83
0.244338	0.179047	478.61
0.251631	0.138345	478.61
0.26135	0.10788	478.61
0.276933	0.141809	478.61
0.26485	0.203235	478.61
0.318207	0.176337	475.83
0.288047	0.221859	478.61
0.205739	0.0681236	478.61
0.212384	0.121511	478.61
0.368023	0.229978	475.83
-0.275839	-0.0767068	390.27
-0.0840144	-0.214398	395.83
-0.0392921	-0.33252	393.05
-0.0285427	-0.252421	387.49
-0.0569539	-0.0609311	384.71
0.00204641	-0.0676809	387.49
0.263707	-0.271406	393.05
0.302858	-0.219385	393.05
0.353115	-0.304096	390.27
0.281614	-0.176319	390.27
0.288024	-0.326403	395.83
0.275901	-0.357617	393.05
0.385893	0.00136917	393.05
0.325869	-0.0354326	390.27
0.235064	-0.00102508	390.27
0.246599	0.00117623	390.27
0.284382	0.0276408	390.27
0.186001	0.0216203	393.05
0.170665	-0.0154561	387.49
0.143051	0.077434	387.49
0.107345	0.0952718	393.05
0.0942886	0.060186	390.27
0.0651381	0.0914553	390.27
0.140276	0.128895	393.05
0.160529	0.109257	390.27
0.257651	0.134754	387.49
0.26525	0.112181	393.05
0.225327	0.229818	393.05
-0.188449	0.0276941	318.609
-0.19889	0.0942816	310.27
-0.10121	-0.26216	310.268
-0.183806	-0.230929	313.048
-0.0834571	-0.128792	307.489
-0.026955	-0.203776	313.049
0.122386	0.0788765	313.051
0.141809	0.0398392	315.831
0.195175	0.0691844	310.272
0.177249	0.068364	313.052
0.188691	0.135609	313.052
0.197945	0.153947	307.492
0.202281	0.199383	313.053
0.251446	0.184353	307.493
0.24685	0.231032	315.833
0.284051	0.162097	307.493
0.253345	0.122467	310.272
0.299648	0.107117	310.272
0.295911	0.0440173	310.272
0.282337	0.00782031	313.052
0.359338	0.072854	313.053
0.303816	0.0145494	315.832
0.240574	-0.0611675	318.611
0.225163	-0.183868	313.05
0.22862	-0.208529	313.05
0.279693	-0.222872	315.83
0.284494	-0.294694	315.83
0.308144	-0.124927	310.271
0.423423	-0.0314722	315.832
0.214763	0.132946	310.272
-0.142671	0.057265	235.83
-0.0659843	0.00719664	233.05
-0.167224	0.170005	233.05
-0.0350128	-0.0615051	230.27
-0.0375355	-0.0855066	230.27
-0.0781566	-0.172974	235.83
-0.10894	-0.1317	227.49
-0.108258	-0.226329	238.61
-0.0697681	-0.234235	235.83
-0.196035	-0.145687	230.27
0.15063	0.0427732	235.83
0.112285	0.0327789	235.83
0.0669105	0.0654321	233.05
0.0387438	0.0203363	235.83
0.182	-0.000479456	235.83
0.204731	0.0924107	233.05
0.129304	0.186549	235.83
0.103154	0.156027	230.27
0.231177	0.165448	230.27
0.188391	0.18027	233.05
0.258854	0.142663	235.83
0.254739	0.111045	233.05
0.285307	0.116134	230.27
0.281322	0.249377	238.61
0.320584	0.0266071	233.05
0.340894	0.00207947	235.83
0.255844	1.1602e-05	238.61
0.376196	-0.1091	235.83
0.298037	-0.255386	235.83
0.263798	-0.22695	235.83
0.233561	-0.306988	233.05
0.32901	-0.382121	238.61
-0.276493	0.18325	155.822
-0.135443	0.274242	150.271
-0.24149	0.00909393	150.26
-0.141228	-0.173249	150.261
-0.160417	-0.240076	150.259
-0.131747	-0.310004	150.259
-0.0592594	-0.18265	150.264
-0.0347679	-0.105253	155.827
-0.107471	-0.0231843	150.265
0.183512	0.00516302	150.278
0.279367	-0.0208881	153.062
0.25099	-0.00419312	153.061
0.20809	-0.0621063	150.278
0.260936	-0.239118	150.277
0.255323	-0.280129	153.056
0.30536	-0.32961	153.058
0.338002	-0.364081	155.839
0.319137	-0.00956234	150.284
0.340177	0.0227061	155.845
0.348085	0.0461425	153.066
0.374603	0.0366344	155.847
0.329984	0.0760333	153.066
0.375663	0.133286	153.069
0.203337	0.130573	155.842
0.235079	0.0996087	155.843
0.224337	0.0812529	153.062
0.271249	0.0545978	150.283
0.123457	0.107399	150.278
0.105182	0.0636393	150.276
0.105752	0.0870871	150.277
0.0699011	0.0306195	153.054
0.039009	0.0291817	150.272
0.134889	0.0123163	153.056
-0.104937	-0.272759	147.481
0.21582	0.212239	70.27
0.209422	0.138818	73.05
0.235998	0.155019	78.61
0.257785	0.154927	70.27
0.296881	0.141738	75.83
0.31965	0.056573	75.83
0.345791	0.0701605	73.05
0.26837	-0.0382004	70.27
0.250466	-0.0306166	75.83
0.243273	-0.0623552	73.05
0.196166	-0.0230639	70.27
0.160415	-0.160074	73.05
0.197434	-0.158238	73.05
0.321775	-0.182118	73.05
0.291484	-0.268031	73.05
0.230895	-0.355724	75.83
0.263256	-0.373497	75.83
-0.0699253	-0.175403	75.83
-0.0936683	-0.123057	70.27
-0.0823445	-0.231961	70.27
-0.066173	-0.241204	73.05
-0.0312167	-0.155372	75.83
-0.0498694	-0.296449	70.27
-0.0887278	-0.369863	78.61
0.149259	0.0373083	73.05
0.316332	-0.30897	70.27
-0.124513	0.0869816	-1.39
-0.278736	-0.125535	-1.39
-0.116225	-0.205531	-1.39
-0.120513	-0.311829	-1.39
-0.0514751	-0.25459	-1.39
-0.0354739	-0.193184	-4.17
0.00214597	-0.224688	-1.39
0.00453219	-0.0622476	-1.39
0.0936951	0.0393057	-1.39
0.101885	0.0129662	-1.39
0.0527493	-0.0177606	-4.17
0.174504	-0.0160876	-1.39
0.196193	0.0438471	-1.39
0.218799	0.0640878	-1.39
0.208527	0.103551	-1.39
0.180568	0.122658	-1.39
0.180491	0.154193	-1.39
0.166189	0.155294	-1.39
0.158713	0.166235	-1.39
0.141261	0.165872	-1.39
0.126539	0.16929	-1.39
0.254795	0.0817103	-1.39
0.159626	0.0967063	-4.17
0.0916446	0.0931902	-1.39
0.348834	-0.323641	-1.39
0.265241	-0.365476	-1.39
0.307583	-0.0351892	-4.17
0.334285	-0.00803597	-1.39
0.322612	0.0662913	-1.39
0.28971	-0.0392124	-1.39
0.387348	0.0932442	-1.39
0.301841	0.125994	-1.39
0.290046	0.150111	-1.39
0.296926	0.164564	-1.39
0.281815	0.21106	-1.39
0.132332	-0.0190332	-84.17
0.192949	0.0385992	-84.17
0.159568	0.0751587	-84.17
0.146214	0.0863455	-86.95
0.162279	0.0997053	-81.39
0.182392	0.111278	-84.17
0.204387	0.125303	-81.39
0.22241	0.126458	-81.39
0.258319	0.0697853	-81.39
0.299079	0.138301	-86.95
0.277013	0.174645	-81.39
0.261944	0.22091	-86.95
0.18404	0.231764	-81.39
0.105959	0.234968	-81.39
0.0678326	0.0764612	-81.39
0.10586	0.0769387	-86.95
0.114015	0.0437542	-84.17
-0.0206852	-0.0934357	-84.17
-0.0509658	-0.216108	-84.17
-0.0946774	-0.141004	-84.17
-0.130917	-0.233517	-81.39
-0.188216	-0.217804	-84.17
-0.205573	-0.163323	-84.17
-0.224424	0.154131	-84.17
-0.117458	0.199913	-81.39
-0.273901	0.183276	-84.17
0.288091	-0.0121608	-84.17
0.309173	-0.0260145	-81.39
0.331904	0.0472981	-86.95
0.223732	-0.286508	-84.17
0.139296	-0.280792	-81.39
0.307539	0.0974091	-161.39
0.290693	0.12	-161.39
0.299214	0.183808	-161.39
0.32389	0.224421	-161.39
0.248548	0.107657	-161.39
0.244346	0.0977495	-161.39
0.384789	-0.334285	-161.39
0.181613	-0.0283413	-161.39
0.142946	0.00452984	-161.39
0.147699	0.0345308	-161.39
0.115004	0.142529	-161.39
0.0994138	0.154391	-161.39
0.186841	0.217934	-161.39
0.0994124	-0.09757	-161.39
0.0648858	0.0204775	-161.39
0.125758	0.0598153	-161.39
0.187238	-0.135608	-161.39
-0.0932318	-0.0871404	-161.39
-0.205002	0.0528602	-161.39
-0.0825443	-0.252929	-161.39
-0.0833256	-0.186463	-161.39
-0.0863821	-0.290327	-161.39
0.351722	0.0430587	-161.39
0.20881	-0.282818	-246.95
0.149486	-0.00730482	-244.17
0.134973	0.0625391	-244.17
0.157598	0.0588793	-241.39
0.10591	0.0245598	-244.17
0.122053	0.0891817	-241.39
0.246363	0.0692244	-244.17
0.265207	0.0649448	-244.17
0.318775	0.00279096	-241.39
0.271953	-0.0193842	-241.39
0.245381	-0.0429155	-241.39
0.124303	-0.254567	-244.17
-0.0170413	-0.210846	-241.39
-0.0991047	-0.261893	-244.17
-0.118465	-0.164688	-241.39
-0.0690357	-0.159985	-244.17
0.0775649	0.0231041	-241.39
-0.133486	0.134543	-244.17
-0.181223	0.276329	-241.39
-0.224171	-0.0147933	-244.17
-0.181744	-0.00458777	-244.17
0.396955	-0.232268	-241.39
0.187146	0.15859	-321.39
0.243999	0.207871	-321.39
0.297901	0.192229	-321.39
0.311225	0.164959	-321.39
0.318144	0.125808	-321.39
0.339843	0.081599	-324.17
0.291571	0.0617228	-321.39
0.277538	0.102605	-324.17
0.266679	0.126853	-321.39
0.21007	0.115344	-321.39
0.243501	0.131001	-321.39
0.159734	0.0951737	-321.39
0.152647	0.0359361	-324.17
0.189884	0.0528901	-324.17
0.196931	-0.0355407	-321.39
0.223057	-0.0425833	-321.39
0.287932	-0.0645303	-321.39
0.129195	0.193171	-324.17
0.0528999	0.00817993	-324.17
-0.00462281	0.0855128	-321.39
0.00657913	-0.0527964	-321.39
-0.133089	-0.118333	-326.95
-0.0782966	-0.135821	-321.39
-0.0565561	-0.169043	-321.39
-0.0841724	-0.195353	-321.39
-0.235543	0.241751	-321.39
0.271914	-0.346344	-321.39
0.321518	-0.291834	-321.39
0.342674	-0.397082	-401.39
0.208486	-0.244096	-401.39
0.123817	-0.0728307	-401.39
0.0952941	-0.0265644	-401.39
0.107376	0.0581799	-401.39
0.134326	0.0992591	-401.39
0.135297	0.16918	-401.39
0.195401	0.136124	-401.39
0.228206	0.107418	-401.39
0.25292	0.0883369	-401.39
0.267512	0.138258	-401.39
0.328067	0.11989	-401.39
0.329228	0.0493125	-401.39
0.317608	-0.0117699	-401.39
-0.0214527	-0.196907	-404.17
-0.0700752	-0.102831	-401.39
-0.107863	-0.198735	-401.39
-0.127183	-0.279291	-404.17
0.0903443	0.0788118	-401.39
0.316132	-0.108414	-409.73
0.3776	0.161125	-481.39
0.371531	0.146268	-481.39
0.308265	0.107901	-481.39
0.297365	0.0466162	-481.39
0.30265	0.176815	-481.39
0.23385	0.15744	-481.39
0.187119	0.114886	-481.39
0.174699	0.163213	-481.39
0.124323	0.0983177	-481.39
0.0935853	0.146833	-481.39
0.0351891	0.0969396	-481.39
0.167229	0.0198391	-481.39
0.205637	0.021739	-481.39
0.145725	-0.161173	-481.39
0.20661	-0.269221	-481.39
0.0483057	-0.0255965	-481.39
-0.00628818	-0.0840291	-481.39
-0.0247655	-0.133887	-481.39
-0.0730601	-0.202125	-481.39
-0.0912551	-0.270779	-481.39
-0.219788	0.146831	-481.39
0.277203	0.237208	-566.951
0.287903	0.159011	-566.95
0.308227	0.131289	-566.95
0.31794	0.0233161	-564.17
0.357255	0.0349431	-564.17
0.280966	-0.0109129	-569.73
0.237349	0.00151335	-569.73
0.241782	0.014897	-566.95
0.234345	0.0286897	-569.73
0.234419	-0.0218874	-566.95
0.18902	-0.00556173	-569.73
0.165698	-0.0976527	-566.95
0.104085	0.0984429	-566.95
0.114748	0.145518	-569.73
0.0910505	0.174664	-564.17
0.150728	0.115951	-569.73
0.0674939	0.0109191	-569.73
-0.115684	0.190561	-569.73
-0.150961	-0.0158687	-569.73
-0.120639	-0.100315	-569.73
-0.120468	-0.0797483	-569.73
-0.0387658	-0.102814	-569.73
0.013384	-0.118871	-572.51
-0.0578739	-0.212941	-569.73
-0.0592395	-0.228091	-569.73
-0.087185	-0.236749	-572.51
-0.12591	-0.20746	-566.95
-0.187036	-0.116394	-564.17
0.193976	0.18568	-569.73
-0.236946	0.224747	-652.51
-0.165839	-0.10503	-649.73
-0.117977	-0.16658	-655.29
-0.125958	-0.254421	-649.73
-0.228827	-0.224111	-641.39
-0.11226	-0.0985378	-655.29
-0.0418814	-0.146904	-644.17
0.0622899	-0.0776369	-649.73
0.0370432	-0.0559213	-646.95
0.105559	-0.047143	-646.95
0.167147	-0.0444813	-652.51
0.205954	-0.0389228	-652.51
0.189341	-0.129964	-649.73
0.207265	-0.16406	-652.51
0.167717	-0.289738	-644.17
0.272456	-0.0451516	-641.39
0.248924	0.00721104	-644.17
0.282831	0.0474873	-649.73
0.25607	0.147256	-649.73
0.24223	0.143472	-646.95
0.251447	0.168187	-646.95
0.28699	0.149796	-649.73
0.294346	0.189452	-652.51
0.387746	0.111568	-641.39
0.350852	0.0763326	-649.73
0.184122	0.180086	-649.73
0.127565	0.118274	-646.95
0.133242	0.0665179	-649.73
0.153815	0.0602611	-649.73
0.177997	0.0718482	-652.51
0.19483	0.164037	-652.51
-0.260032	0.106767	-721.39
-0.217084	0.0129562	-726.95
-0.110776	0.0637183	-721.39
-0.107692	-0.11635	-721.39
-0.0550264	-0.185609	-724.17
-0.100326	-0.291545	-724.17
-0.139799	-0.316379	-729.73
-0.203295	-0.116436	-724.17
-0.123589	-0.199827	-721.39
0.0235566	0.0478284	-726.95
0.0660984	0.0736337	-729.73
0.0690524	0.0786624	-726.95
0.117658	0.0593058	-726.95
0.142653	0.0675443	-721.39
0.183138	0.075978	-726.95
0.199163	0.134217	-726.95
0.186201	0.192964	-721.39
0.231322	0.171752	-726.95
0.247655	0.179125	-724.17
0.272629	0.225649	-726.95
0.295563	0.12676	-726.95
0.251466	0.103193	-729.73
0.263684	0.0326042	-724.17
0.281427	-0.0826726	-721.39
0.273366	-0.214905	-738.07
0.304742	-0.158773	-732.51
0.421122	-0.238883	-724.17
-0.349636	0.215355	-806.95
-0.226746	-0.0370418	-812.51
-0.108934	-0.280826	-815.29
-0.0696535	-0.192259	-806.95
-0.0707227	-0.160084	-815.29
-0.14347	-0.243909	-815.29
0.0720179	0.0149406	-809.73
0.170885	-0.368122	-804.17
0.192699	-0.277589	-812.51
0.223733	-0.337195	-804.17
0.264745	-0.197058	-804.17
0.252779	-0.0974421	-815.29
0.26587	-0.226952	-804.17
0.353972	0.0269714	-812.51
0.36614	0.0259768	-812.51
0.35124	0.081278	-806.95
0.141078	0.0569973	-812.51
0.0870877	0.16856	-806.95
0.217844	0.098174	-815.29
0.255905	0.080824	-815.29
0.378208	0.0411843	-884.17
0.349635	-0.0148736	-881.39
0.291279	-0.0191236	-881.39
0.287158	0.0172242	-886.95
0.325187	0.0372589	-881.39
0.269616	-0.0266533	-884.17
0.243896	0.00906038	-886.95
0.204682	-0.0638744	-886.95
0.228296	-0.173904	-886.95
0.20462	-0.316037	-881.39
0.290247	-0.391552	-884.17
0.323322	-0.412534	-881.39
0.177032	0.00599906	-881.39
0.198665	0.0121008	-881.39
0.244386	0.0766071	-884.17
0.258275	0.0954861	-884.17
0.291322	0.0861249	-884.17
0.236645	0.135623	-886.95
0.251365	0.174028	-886.95
0.302441	0.179276	-881.39
0.347306	0.232118	-886.95
0.212657	0.2534	-886.95
0.0995166	0.113811	-886.95
0.0569942	0.00330969	-886.95
-0.0173261	0.0336505	-889.73
-0.146396	-0.154816	-881.39
-0.157366	-0.226565	-884.17
0.153849	0.149818	-884.17
-0.158879	-0.269604	-961.39
-0.262007	-0.041674	-972.51
-0.0982222	-0.208378	-972.51
-0.104215	-0.178833	-969.73
0.108016	-0.223983	-969.73
0.209319	-0.0858923	-969.73
0.248356	-0.146202	-969.73
0.296618	-0.0803129	-961.39
0.32941	-0.0219082	-961.39
0.341217	-0.0571215	-966.95
0.3006	0.0521282	-966.95
0.29248	0.052319	-966.95
0.250196	-0.0226007	-966.95
0.225917	-0.018414	-969.73
0.208134	0.0499231	-966.95
0.176379	0.0570948	-969.73
0.200882	0.0806037	-969.73
0.199628	0.100625	-964.17
0.205273	0.114869	-961.39
0.15662	0.12696	-961.39
0.111414	0.172622	-966.95
0.156171	0.24054	-966.95
0.3593	-0.0399891	-961.39
-0.262797	0.195932	-1049.73
-0.334259	-0.113666	-1049.73
-0.214166	-0.122012	-1049.73
-0.173564	-0.135397	-1046.95
-0.126226	-0.117901	-1044.17
-0.0908083	-0.130391	-1049.73
-0.103536	-0.209901	-1046.95
-0.166788	-0.25903	-1041.39
0.0346993	0.0160307	-1044.17
0.0611561	0.0424371	-1046.95
0.0801084	0.0494671	-1046.95
0.184383	0.0394724	-1041.39
0.207825	0.111064	-1046.95
0.200072	0.14312	-1044.17
0.132578	0.1857	-1049.73
0.143314	0.135401	-1044.17
0.230849	0.130501	-1044.17
0.262307	0.151719	-1046.95
0.256074	0.19209	-1041.39
0.307049	0.041357	-1044.17
0.266394	0.0231079	-1046.95
0.230958	-0.0303496	-1044.17
0.461803	-0.233123	-1049.73
0.376286	0.00586246	-1041.39
-0.283232	-0.148655	-1124.17
-0.267117	0.00119178	-1121.39
-0.112873	-0.268178	-1126.95
0.0648053	-0.124796	-1121.39
0.219731	-0.101658	-1121.39
0.206175	-0.072944	-1121.39
0.276412	0.0536884	-1121.39
0.341785	0.0696897	-1121.39
0.352809	0.0377478	-1121.39
0.356139	-0.0471298	-1121.39
0.208159	0.0811641	-1121.39
0.19684	0.0675319	-1124.17
0.183822	0.0751367	-1124.17
0.184156	0.128126	-1121.39
0.218891	0.1223	-1124.17
0.200466	0.155434	-1121.39
0.228445	0.155027	-1121.39
0.234169	0.18988	-1124.17
0.267043	0.164002	-1121.39
0.194739	0.248744	-1121.39
0.242775	0.278768	-1121.39
0.184989	0.168371	-1121.39
0.13718	0.0631254	-1121.39
0.0926702	0.112504	-1121.39
0.225223	0.0152338	-1121.39
0.229809	0.0649924	-1209.73
0.227674	0.0113633	-1204.17
0.265835	-0.042489	-1206.95
0.25996	-0.0224644	-1206.95
0.273264	-0.0909089	-1201.39
0.277384	-0.173763	-1204.17
0.261241	-0.262347	-1201.39
0.234878	-0.0688573	-1209.73
0.258104	0.181502	-1204.17
0.265056	0.244311	-1209.73
0.221737	0.162806	-1204.17
0.214571	0.143926	-1204.17
0.213563	0.158063	-1204.17
0.210788	0.189298	-1201.39
0.206309	0.121666	-1209.73
0.207428	0.133246	-1204.17
0.175703	0.22	-1204.17
0.157007	0.0891	-1206.95
0.119025	0.0751558	-1209.73
-0.0657532	-0.112584	-1204.17
-0.0943017	-0.11498	-1209.73
-0.102323	-0.245275	-1204.17
-0.153863	-0.214659	-1206.95
-0.237125	-0.227736	-1212.51
-0.0804524	-0.214688	-1289.73
-0.0459213	-0.26588	-1289.73
-0.119459	-0.215926	-1284.17
-0.112914	-0.132391	-1286.95
-0.0591542	-0.000628548	-1286.95
-0.180895	-0.0164114	-1295.29
0.0801822	0.119254	-1286.95
0.0669247	0.0276453	-1286.95
0.121995	-0.0316839	-1284.17
0.171215	-0.053307	-1286.95
0.234487	-0.010077	-1284.17
0.219963	-0.0952191	-1284.17
0.293186	-0.0243318	-1286.95
0.332533	-0.073431	-1281.39
0.419598	-0.116774	-1286.95
0.357099	-0.0430386	-1284.17
0.313397	0.0654805	-1286.95
0.286126	0.174047	-1289.73
0.303191	0.165462	-1289.73
0.311407	0.167704	-1289.73
0.297571	0.230944	-1286.95
0.240787	0.119556	-1284.17
0.251455	0.103135	-1286.95
0.160504	0.249667	-1284.17
0.113671	0.166354	-1286.95
0.118179	0.121886	-1284.17
0.26977	0.187157	-1286.95
-0.427664	-0.145058	-1361.39
-0.205944	-0.183512	-1361.39
-0.10019	-0.0926809	-1372.51
-0.0670348	-0.19284	-1369.73
-0.104292	-0.252813	-1361.39
-0.0343639	-0.231622	-1361.39
-0.195656	0.0723803	-1364.17
-0.116104	-0.1396	-1375.29
0.102724	-0.00684049	-1364.17
0.157426	-0.0836791	-1361.39
0.233861	-0.0802766	-1366.95
0.321522	-0.0653756	-1366.95
0.311781	-0.00702178	-1364.17
0.243212	-0.000421022	-1361.39
0.268743	0.0299947	-1366.95
0.308665	0.0664338	-1364.17
0.345958	0.0754986	-1366.95
0.348624	0.0499416	-1361.39
0.371036	0.158138	-1366.95
0.287658	0.158396	-1366.95
0.285187	0.185418	-1366.95
0.253098	0.204168	-1372.51
0.239107	0.188514	-1369.73
0.217867	0.158139	-1364.17
0.165815	0.073843	-1364.17
0.219732	0.260555	-1361.39
0.29603	-0.0202479	-1444.17
0.312025	0.0733156	-1446.95
0.268062	0.116422	-1444.17
0.241476	0.163594	-1441.39
0.240729	0.195871	-1444.17
0.237622	0.210878	-1444.17
0.208947	0.23494	-1446.95
0.207088	0.224271	-1446.95
0.128997	0.238922	-1444.17
0.104927	0.1738	-1441.39
0.0980012	0.109928	-1444.17
0.210175	-0.149737	-1449.73
0.269994	-0.152414	-1444.17
0.218406	-0.337772	-1446.95
0.224978	-0.250775	-1452.51
0.0372207	-0.0531483	-1444.17
-0.0552135	-0.135488	-1452.51
-0.139869	-0.0292898	-1446.95
-0.102484	-0.223179	-1444.17
-0.239971	-0.183433	-1452.51
-0.275919	-0.143659	-1529.73
-0.151197	-0.155926	-1529.73
-0.0899952	-0.134565	-1526.95
-0.0740244	-0.209914	-1526.95
-0.105836	-0.22088	-1532.51
-0.070318	-0.237579	-1532.51
-0.118044	0.0149034	-1529.73
-0.289353	0.198865	-1529.73
0.066203	0.0127773	-1529.73
0.111036	0.09314	-1526.95
0.105275	0.12438	-1532.51
0.0819744	0.171765	-1529.73
0.111935	-0.0232828	-1529.73
0.169061	0.0166197	-1526.95
0.196184	0.027134	-1529.73
0.218496	-0.0249453	-1526.95
0.179206	-0.13658	-1529.73
0.237195	0.0495972	-1526.95
0.25985	-0.0136221	-1529.73
0.287642	-0.048439	-1529.73
0.339487	-0.0557947	-1532.51
0.347058	-0.0430736	-1529.73
0.389031	-0.110292	-1529.73
0.408846	-0.102672	-1529.73
0.368148	-0.0117037	-1529.73
0.3659	0.0439525	-1526.95
0.311102	-0.00473685	-1532.51
0.322764	-0.143191	-1529.73
0.254623	0.103358	-1526.95
0.194575	0.0914695	-1526.95
0.175445	0.119784	-1526.95
0.304853	0.22449	-1529.73
0.245974	0.242976	-1532.51
0.250343	0.262993	-1532.51
0.228101	-0.289621	-1524.17
0.327438	0.081517	-1606.95
0.374237	-0.0191739	-1601.39
0.235702	-0.225051	-1601.39
0.224796	-0.0529528	-1604.17
0.248746	-0.0353767	-1604.17
0.215617	-0.0373983	-1604.17
0.244678	0.00713585	-1604.17
0.078928	-0.0108927	-1606.95
0.0556075	0.0394608	-1606.95
0.0813369	0.06197	-1604.17
0.142216	0.112032	-1606.95
0.184991	0.243623	-1606.95
0.11303	-0.0173515	-1601.39
0.0351383	0.0380978	-1604.17
0.0175803	0.0295044	-1601.39
-0.0515321	-0.194196	-1604.17
-0.101161	-0.214332	-1606.95
-0.151964	-0.103921	-1604.17
-0.24042	-0.153106	-1604.17
-0.258342	-0.0889189	-1681.39
-0.186206	0.123502	-1684.17
-0.201612	0.148635	-1681.39
-0.150016	-0.107442	-1681.39
-0.116615	-0.102056	-1681.39
0.036204	2.77099e-05	-1681.39
0.061295	-0.117739	-1681.39
0.147772	-0.0311299	-1681.39
0.165554	-0.0279034	-1681.39
0.154663	0.00823609	-1681.39
0.114972	-0.0389811	-1681.39
0.131597	-0.141074	-1681.39
0.207958	-0.111262	-1681.39
0.214279	-0.0301429	-1681.39
0.205781	0.0223739	-1681.39
0.253253	0.0462593	-1681.39
0.277975	0.075425	-1681.39
0.210528	0.116783	-1681.39
0.225068	0.171915	-1681.39
0.354957	0.251678	-1681.39
0.365416	0.0906332	-1681.39
0.347335	0.00981988	-1681.39
0.361726	-0.0301727	-1681.39
0.31796	0.00473684	-1681.39
0.243131	-0.261025	-1681.39
0.199826	-0.345436	-1681.39
0.312759	-0.0348685	-1761.39
0.289783	0.000238966	-1761.39
0.353969	-0.0273306	-1761.39
0.335722	-0.0742145	-1761.39
0.394506	-0.0350622	-1761.39
0.286833	-0.141345	-1761.39
0.260222	0.0950001	-1761.39
0.261536	-0.246445	-1761.39
0.158246	0.0322148	-1761.39
0.185112	0.0403879	-1761.39
0.159845	0.116864	-1761.39
0.211613	0.110732	-1761.39
0.226887	0.182315	-1761.39
0.175393	0.254896	-1761.39
0.10393	0.176649	-1761.39
0.125556	0.124879	-1761.39
0.0912724	0.133966	-1761.39
0.0868529	-0.0374405	-1761.39
0.0582475	-0.00632126	-1761.39
-0.0634025	-0.203427	-1761.39
-0.127751	-0.21134	-1761.39
-0.148205	-0.167724	-1761.39
-0.118986	-0.075782	-1761.39
-0.147495	0.0491718	-1761.39
-0.30631	0.214098	-1761.39
-0.144057	-0.0558682	-1846.95
-0.0901484	-0.103159	-1844.17
-0.093623	-0.241771	-1841.39
-0.156147	-0.238518	-1849.73
-0.189239	-0.15562	-1841.39
-0.35509	-0.15242	-1846.95
0.0464641	-0.0219018	-1844.17
0.116056	0.124862	-1841.39
0.147677	0.0599802	-1841.39
0.113322	-0.0164465	-1841.39
0.201741	0.0972625	-1841.39
0.214324	0.140614	-1841.39
0.229502	0.158064	-1844.17
0.215427	0.240181	-1841.39
0.356029	-0.00695778	-1841.39
0.38445	0.00260519	-1841.39
0.374978	-0.0715827	-1844.17
0.294311	-0.402387	-1841.39
0.260656	-0.295745	-1841.39
0.0587589	0.0102222	-1841.39
-0.0692808	0.000596918	-1921.39
0.0326209	-0.105324	-1921.39
0.0106213	-0.0699665	-1921.39
0.0445149	-0.000654471	-1921.39
0.0976181	-0.0210754	-1921.39
0.164911	0.00950346	-1921.39
0.208827	-0.0755142	-1921.39
0.298661	-0.230539	-1921.39
0.201461	-0.294378	-1921.39
-0.101322	-0.294986	-1921.39
-0.155389	-0.213174	-1921.39
-0.20262	-0.00733255	-1921.39
0.140669	0.180124	-1921.39
0.204051	0.0887715	-1921.39
0.319805	0.164997	-1921.39
0.317181	0.150948	-1921.39
0.376492	-0.110953	-1921.39
0.335955	-0.380096	-1921.39
-0.141315	-0.267066	-2001.39
-0.0647024	-0.134172	-2001.39
-0.196924	-0.193327	-2001.39
-0.215908	0.228513	-2001.39
-0.0593222	0.208867	-2001.39
0.091713	0.0787568	-2001.39
0.13237	0.0611217	-2001.39
0.0488199	0.00940069	-2001.39
0.221634	0.131042	-2001.39
0.265451	0.119818	-2001.39
0.238009	0.151274	-2001.39
0.275696	0.173419	-2001.39
0.333084	0.263027	-2001.39
0.218418	0.110666	-2001.39
0.204436	0.0624781	-2001.39
0.235877	-0.0818399	-2001.39
0.238904	-0.115081	-2001.39
0.258841	-0.15133	-2001.39
0.368507	0.038115	-2001.39
0.367947	-0.119775	-2004.17
0.391645	-0.162892	-2001.39
0.2554	-0.248111	-2001.39

## Sheet: Sheet2
0.0491754	-0.128049	1110.27
0.374718	-0.255463	1038.61
0.359116	-0.354209	1035.83
0.412911	0.0175657	1038.61
0.361532	-0.322521	1033.05
0.347828	-0.270588	958.61
0.326448	-0.31878	958.61
0.343108	-0.165635	875.83
0.363667	-0.169159	875.83
0.351072	-0.195602	875.83
0.374741	-0.20349	875.83
0.369112	-0.259889	873.05
0.389482	-0.34114	875.83
0.378901	-0.359204	875.83
0.335943	-0.182554	798.61
0.360559	-0.196714	798.61
0.35808	-0.337312	798.61
0.378011	-0.345984	798.61
0.394494	-0.212698	713.047
0.374013	-0.275644	715.828
0.381936	-0.332547	713.048
0.215165	-0.336462	715.829
0.375042	-0.148436	635.83
0.386889	-0.405424	638.61
0.194811	-0.342535	553.05
0.214289	-0.362139	475.83
0.317151	-0.2407	478.61
0.334871	-0.335623	393.05
0.195681	-0.346859	387.49
0.384067	-0.0608916	313.052
0.336172	-0.272365	313.051
0.356687	-0.296794	233.05
0.370997	-0.284665	235.83
0.383374	-0.29981	153.062
0.173246	-0.334588	147.492
0.356295	-0.162372	78.61
0.301931	-0.228001	-1.39
0.32517	-0.254822	-1.39
0.338029	-0.200746	-84.17
0.288261	-0.21884	-81.39
0.355833	-0.0955139	-161.39
0.364394	-0.202014	-241.39
0.315618	-0.209583	-241.39
0.279829	-0.209008	-321.39
0.408594	-0.331017	-401.39
0.307112	-0.286945	-481.39
0.283722	-0.211064	-569.73
