# Supplementary material for: Spinal premotor interneurons controlling antagonistic muscles are spatially intermingled
Source: eLife. 2022 Dec 13;11:e81976. doi: 10.7554/eLife.81976 (PMC9844990; doi:10.7554/eLife.81976)
Supplement: Figure 12—figure supplement 5—source data 4. [file elife-81976-fig12-figsupp5-data4.xlsx]

## Sheet: Sheet1
0.186772	0.178	-2790.27
0.103885	0.12918	-2784.71
-0.19326	-0.0682245	-2790.27
-0.310774	0.054181	-2790.39
-0.204526	-0.162095	-2787.49
-0.197898	0.0513232	-2718.53
-0.151435	-0.149029	-2716.32
0.268782	-0.263391	-2711.25
0.347035	-0.161427	-2708.41
0.329588	0.038679	-2713.77
0.261	-0.0453182	-2713.77
0.255107	-0.0196115	-2713.69
0.19804	-0.0151029	-2715.83
0.278575	-0.268193	-2627.49
0.340394	-0.258081	-2627.49
0.253163	0.0367932	-2630.27
0.294831	-0.038768	-2630.27
0.24859	0.138763	-2627.49
0.0040283	0.0598781	-2630.27
-0.137467	-0.0148894	-2630.27
-0.140071	-0.168768	-2627.49
-0.0840101	-0.104952	-2630.27
0.210963	-0.293106	-2627.49
-0.137219	-0.167715	-2550.27
-0.140528	-0.123082	-2550.27
0.240827	0.0399858	-2547.49
0.318996	-0.0605083	-2544.71
0.203534	0.0314327	-2550.27
0.0991082	0.221563	-2550.27
0.133186	0.121365	-2547.49
0.331034	-0.0533916	-2550.27
-0.239154	-0.141701	-2547.49
0.185844	0.186705	-2467.49
0.119493	0.0978722	-2467.49
-0.00875261	0.0815679	-2467.49
-0.105404	-0.146618	-2470.27
-0.17403	-0.126034	-2470.27
0.255579	-0.0702329	-2470.27
0.281208	-0.016626	-2467.49
0.205926	0.0372335	-2470.27
0.161322	0.0221208	-2470.27
0.27696	0.0670945	-2467.49
0.32725	0.0352517	-2464.71
0.360369	0.0057392	-2467.49
-0.208109	-0.312046	-2395.84
-0.144395	-0.0718251	-2393.05
-0.0928934	-0.167668	-2390.27
-0.0595234	-0.0306853	-2390.27
0.172968	-0.113383	-2390.27
0.243549	-0.190312	-2387.49
0.351313	-0.233035	-2390.26
0.307995	-0.0811662	-2390.26
0.215366	0.132208	-2390.26
0.172223	0.106885	-2393.05
0.130954	0.0690938	-2387.49
0.350566	0.0100946	-2307.49
0.306758	-0.0908127	-2310.27
0.358966	-0.196381	-2310.27
0.215611	0.0761764	-2310.27
0.219606	0.0920547	-2310.27
0.209055	0.156412	-2310.27
0.167029	0.0697685	-2313.05
0.0826506	0.19364	-2313.05
-0.0791839	-0.176171	-2313.05
-0.113387	-0.218669	-2313.05
-0.125594	-0.201837	-2315.83
-0.204039	-0.1657	-2315.83
0.142907	0.0543369	-2230.27
0.15897	0.0347334	-2230.27
0.177499	0.0645712	-2233.05
0.192564	0.0449994	-2233.04
0.237648	0.140686	-2230.26
0.173075	0.13386	-2230.27
0.138375	0.12268	-2230.27
0.324652	-0.194345	-2233.04
0.333006	0.045604	-2230.26
0.283701	0.135888	-2166.95
0.221666	0.17376	-2166.95
0.223706	0.233153	-2166.95
0.190377	0.0239485	-2166.95
0.275658	0.0010387	-2166.95
0.247444	0.0141683	-2169.73
0.311082	0.0238396	-2166.95
0.358955	0.0119177	-2166.95
0.293846	-0.105306	-2166.95
0.31805	-0.18422	-2169.73
0.349262	-0.367001	-2166.96
0.30354	-0.362207	-2166.95
0.201255	-0.141077	-2164.17
0.193438	0.0708475	-2166.95
0.158163	0.152384	-2067.49
0.14626	0.163245	-2067.49
0.101792	0.115726	-2070.27
0.123534	0.0766929	-2064.71
0.164042	0.0734496	-2064.71
0.15962	0.101584	-2064.71
0.205955	0.00334718	-2064.71
0.17956	0.0518428	-2064.71
0.178211	-0.0169446	-2064.71
0.190652	-0.103511	-2064.71
0.28992	-0.143438	-2064.71
0.265597	0.109452	-2064.71
0.330518	0.0363516	-2064.71
0.238402	0.0269336	-2067.49
-0.103612	-0.000407382	-2067.49
-0.0928973	-0.0488167	-2067.49
-0.119728	-0.111529	-2067.49
-0.108246	-0.188219	-2067.49
0.361217	0.0827074	-2064.71
0.0269581	0.222385	-2070.27
-0.116032	-0.232594	-1990.27
-0.29611	0.249037	-1987.49
-0.179412	0.128925	-1987.49
-0.066212	-0.186322	-1987.49
0.0595038	0.28107	-1987.49
0.137947	0.158965	-1987.49
0.17325	0.067675	-1987.49
0.142782	0.0725781	-1987.49
0.171617	0.00939144	-1984.71
0.237092	0.020988	-1987.49
0.205804	0.0411895	-1987.49
0.220706	0.060349	-1987.49
0.206935	0.0940601	-1990.27
0.215049	0.124205	-1987.49
0.19251	0.119943	-1990.27
0.250497	0.0995688	-1987.49
0.307884	0.0668983	-1990.27
0.312748	0.00421814	-1987.49
0.314341	0.242927	-1987.49
0.314699	-0.148835	-1987.49
0.351782	-0.0771082	-1987.49
0.278878	-0.0894827	-1987.49
0.254936	-0.0601233	-1984.71
-0.212254	-0.12966	-1907.49
-0.145257	-0.0680622	-1907.49
0.14278	0.0915639	-1907.49
0.0581337	0.0363339	-1910.27
0.205685	0.170408	-1907.49
0.138545	0.154731	-1907.49
0.0551039	0.159406	-1907.49
0.0897795	0.234149	-1907.49
0.163454	0.136802	-1907.49
0.187864	0.10513	-1907.49
0.132021	0.0633493	-1907.49
0.235961	0.00738832	-1907.49
0.266119	0.0311745	-1907.49
0.307089	-0.090088	-1907.49
0.327303	-0.164449	-1910.27
0.259183	-0.308329	-1907.49
0.392713	0.0562091	-1907.49
0.344048	0.0506419	-1907.49
0.281863	0.0974941	-1910.27
0.298074	0.148225	-1907.49
0.329802	0.142037	-1907.49
0.344384	-0.126046	-1907.49
0.312448	-0.0341965	-1907.49
0.224552	0.275549	-1830.27
0.138317	0.124669	-1830.27
0.171333	0.0954572	-1827.49
0.174795	0.0738764	-1827.49
0.18446	0.0284232	-1830.27
0.220437	0.0034253	-1830.27
0.18862	-0.0268384	-1830.27
0.250862	-0.0332213	-1830.27
0.269773	-0.0256052	-1830.27
0.281245	0.0370205	-1830.27
0.273892	0.0544853	-1827.49
0.246611	0.0741177	-1830.27
0.242331	0.0990488	-1830.27
0.060764	0.202553	-1827.49
0.03763	0.0017919	-1827.49
0.337207	-0.0301319	-1830.27
0.425033	-0.0112689	-1830.27
0.306325	-0.194183	-1830.27
-0.106601	-0.108858	-1827.49
-0.166383	-0.0382967	-1830.27
-0.138323	0.0793652	-1827.49
-0.15908	0.00215822	-1747.49
-0.227162	0.0677003	-1747.49
-0.379716	0.275205	-1747.49
0.113259	0.0374146	-1747.49
0.160356	0.0306029	-1744.71
0.106163	0.19989	-1747.49
0.182505	0.179429	-1747.49
0.225099	0.215488	-1747.49
0.198192	0.0429041	-1747.49
0.264779	0.104922	-1750.27
0.366477	0.0445272	-1747.49
0.358926	0.0883206	-1747.49
0.330531	-0.0812879	-1750.27
0.308349	-0.0221327	-1747.49
0.365938	-0.12974	-1747.49
0.273543	-0.305684	-1750.27
0.194709	-0.339903	-1750.27
0.286904	0.0275377	-1747.49
0.182797	0.157204	-1670.27
-0.184545	-0.175132	-1667.49
-0.136757	-0.272039	-1664.71
-0.128487	-0.0759275	-1664.71
0.0656112	0.136615	-1667.49
0.134721	0.1051	-1667.49
0.238526	0.147184	-1667.49
0.279854	0.139464	-1667.49
0.29709	0.0702161	-1667.49
0.326218	-0.0528039	-1667.49
0.232735	-0.0536906	-1670.27
0.27745	-0.332947	-1670.27
0.371014	-0.159106	-1670.27
0.393777	-9.00665e-05	-1670.27
0.209087	0.10613	-1667.49
-0.0997998	-0.18379	-1584.71
-0.126455	-0.205534	-1584.71
-0.14506	-0.27213	-1584.71
-0.097123	0.000287847	-1584.71
0.0535721	0.050731	-1587.49
0.210652	0.0791078	-1587.49
0.223527	0.201243	-1590.27
0.241082	0.168601	-1587.49
0.218109	0.135119	-1587.49
0.254858	0.130668	-1587.49
0.306066	0.107198	-1587.49
0.390093	0.0543661	-1590.27
0.384469	-0.0572251	-1590.27
0.374864	-0.125603	-1590.27
0.304144	-0.0120866	-1590.27
0.276419	-0.0273319	-1587.49
0.238144	-0.0056678	-1587.49
0.249089	0.0122775	-1587.49
0.270317	0.0296539	-1587.49
0.258217	-0.00369342	-1590.27
0.237892	-0.318623	-1587.49
-0.0694797	0.0231088	-1504.48
0.128095	0.0748129	-1509
0.0582911	0.0586609	-1507.39
0.0923277	0.1213	-1507.35
0.0899816	0.142944	-1503.48
0.140161	0.169481	-1508.71
0.170974	0.114834	-1507.4
0.137478	0.129852	-1508.06
0.201057	0.0918674	-1506.53
0.265421	0.114281	-1508.86
0.289565	0.123213	-1512.58
0.356444	0.0814762	-1509.04
0.264836	0.179632	-1502.03
0.231492	0.214301	-1505.82
0.216253	0.0406787	-1507.07
0.207162	0.0268083	-1503.35
0.258803	0.0376559	-1509.49
0.179339	0.0355973	-1506.99
0.166292	0.0669847	-1507.27
0.126766	0.0199476	-1507.58
0.163886	-0.000257648	-1509.98
0.162536	-0.0885639	-1507.96
0.264836	-0.336592	-1508.24
-0.0338973	-0.161803	-1424.71
0.10969	0.0618748	-1427.49
0.162208	0.0350716	-1430.27
0.153474	0.0615237	-1427.49
0.174695	0.0648378	-1427.49
0.191941	0.0376837	-1424.71
0.200544	0.0762191	-1427.49
0.23767	0.0877678	-1427.49
0.231603	0.13567	-1427.49
0.301959	0.145125	-1430.27
0.241277	0.244381	-1424.71
0.150417	0.233036	-1424.71
0.0868217	0.21751	-1427.49
0.0861983	0.197504	-1427.49
0.0889104	0.168549	-1427.49
0.105012	0.107212	-1430.27
0.183196	0.125954	-1427.49
0.215531	-0.161188	-1427.49
0.236505	-0.028077	-1424.71
0.249479	-0.200731	-1430.27
0.265995	-0.192803	-1427.49
0.391296	-0.102694	-1430.27
0.32443	-0.193782	-1430.27
0.25458	-0.061939	-1430.27
0.216439	0.110659	-1350.27
0.203307	0.128461	-1347.49
0.245061	0.187272	-1347.49
0.202385	0.231903	-1347.49
0.138825	0.149037	-1350.27
0.152691	0.0435018	-1347.49
0.141711	0.0295724	-1347.49
0.179579	0.0398096	-1347.49
0.213296	0.0651082	-1350.27
0.251954	0.0874931	-1350.27
0.262395	-0.199324	-1353.05
0.234519	-0.193217	-1347.49
0.243536	-0.32293	-1350.27
0.0311979	0.0342732	-1347.49
0.184214	0.0924217	-1347.49
-0.0876305	-0.183944	-1347.49
-0.0837991	-0.225821	-1347.49
-0.0536477	-0.157266	-1344.71
-0.190236	-0.138708	-1344.71
-0.186721	0.0300927	-1347.49
-0.247617	0.12939	-1344.71
-0.111449	-0.304901	-1347.49
-0.136481	-0.150616	-1264.71
0.127636	-0.00298661	-1264.71
0.161708	0.00527696	-1267.49
0.169165	0.0158979	-1267.49
0.175671	0.00774326	-1267.49
0.183794	0.0590484	-1270.27
0.179157	0.0924875	-1264.71
0.207828	0.0904562	-1267.49
0.22461	0.0817114	-1264.71
0.260906	0.0554018	-1267.49
0.306243	0.0316354	-1270.27
0.216611	0.229475	-1264.71
0.134444	0.0956278	-1267.49
0.114749	0.0355379	-1267.49
0.0638244	0.0262667	-1267.49
0.0674401	0.0783132	-1270.27
0.262301	-0.175785	-1267.49
0.272368	-0.210176	-1264.71
0.295835	-0.390031	-1267.49
0.284595	0.10378	-1270.27
0.212022	0.0447565	-1267.49
0.0531273	0.00590054	-1187.49
0.096981	-0.0845248	-1187.49
0.145278	0.0346626	-1187.49
0.169363	0.101358	-1187.49
0.183104	0.0973746	-1187.49
0.13716	0.282234	-1187.49
0.248805	0.150262	-1184.71
0.275997	0.149731	-1190.27
0.352263	0.109797	-1187.49
0.263073	0.00886732	-1187.49
0.23556	0.00873799	-1190.27
0.221721	0.00277659	-1190.27
0.237966	-0.0346905	-1190.27
0.25524	-0.0520199	-1187.49
0.303047	0.00999512	-1187.49
0.315261	-0.0179909	-1190.27
0.346338	0.0166417	-1190.27
0.261108	-0.307002	-1187.49
0.337651	-0.262039	-1184.71
-0.301055	0.254292	-1107.49
-0.0655842	-0.146069	-1110.27
-0.00455727	-0.0743196	-1104.71
0.0224353	-0.0243847	-1110.27
0.0811665	0.0812943	-1110.27
0.0862843	0.0128703	-1104.71
0.110729	0.0844945	-1107.49
0.12908	0.0631573	-1107.49
0.157618	0.0507728	-1107.49
0.145496	0.00493179	-1110.27
0.150793	-0.0766286	-1107.49
0.208037	-0.00750307	-1107.49
0.208471	0.055898	-1104.71
0.217979	0.00609469	-1107.49
0.228181	0.0110106	-1104.71
0.227521	-0.0550039	-1104.71
0.283454	-0.0168737	-1107.49
0.271638	-0.075215	-1107.49
0.2564	-0.149331	-1107.49
0.261778	0.103966	-1110.27
0.26858	0.125189	-1110.27
0.234781	0.136041	-1110.27
0.196602	0.215357	-1104.71
0.191267	0.122297	-1104.71
0.150806	0.128044	-1104.71
0.247811	-0.310529	-1104.71
0.0293534	-0.0178169	-1107.49
-0.133951	-0.0251648	-1024.71
-0.204916	-0.00217903	-1024.71
-0.00691153	-0.0970914	-1021.93
-0.0579161	-0.182867	-1024.71
0.0843737	0.0997535	-1027.49
0.0609503	0.0584978	-1024.71
0.0276455	0.0115276	-1027.49
0.0440149	0.234619	-1027.49
0.197268	0.195329	-1027.49
0.242703	0.187627	-1027.49
0.297094	0.168581	-1030.27
0.224369	0.13267	-1027.49
0.198947	0.116928	-1027.49
0.168579	0.120154	-1024.71
0.190275	0.137788	-1027.49
0.192534	0.0206454	-1027.49
0.15161	0.0544054	-1027.49
0.167917	0.0145198	-1027.49
0.21446	-0.115279	-1027.49
0.236094	-0.169766	-1027.49
0.212994	-0.257413	-1027.49
0.27936	-0.0543961	-1027.49
0.278326	0.0234731	-947.497
0.298563	0.0255356	-947.497
0.381511	-0.155633	-947.499
0.283797	-0.194386	-947.496
0.268089	-0.273531	-947.495
0.249726	-0.29523	-944.715
0.227567	-0.28043	-947.494
0.197015	-0.0413166	-944.715
0.16104	-0.0330621	-944.714
0.192063	0.0347802	-947.495
0.220256	0.0446169	-944.716
0.178489	0.0748643	-947.495
0.145576	0.0847525	-947.494
0.12395	0.0572954	-944.713
0.163899	0.139277	-944.715
0.243502	0.142588	-947.497
0.249162	0.171752	-950.277
0.268602	0.148387	-947.498
0.305186	0.1421	-950.278
0.251469	0.0939962	-947.497
0.128445	0.162748	-947.494
0.10372	0.206673	-947.494
0.0890292	0.192261	-947.494
0.0353729	0.165014	-944.712
0.0833141	0.123584	-947.493
0.0789088	0.0588439	-947.492
-0.00857755	0.0532926	-944.71
0.00319585	-0.0570805	-944.71
-0.0763988	-0.131344	-944.707
-0.116604	-0.174748	-944.706
-0.165874	-0.144148	-944.705
-0.102561	-0.205763	-944.706
-0.0892147	-0.26667	-944.706
-0.286033	0.0448013	-941.923
-0.173504	-0.0592118	-864.709
-0.18988	0.107458	-864.709
-0.0815767	0.301579	-864.709
-0.0528654	0.0639196	-867.489
-0.0788651	0.0160252	-867.489
0.013057	0.0390998	-864.709
0.0101398	-0.0246621	-867.489
0.0775579	0.12275	-867.489
0.0943811	0.0987972	-867.489
0.125915	0.0734081	-867.489
0.165284	0.0581458	-867.489
0.137973	-0.0132989	-867.489
0.149001	-0.0140454	-867.489
0.115446	-0.144243	-867.489
0.223199	-0.0258201	-867.489
0.27347	-0.0921413	-867.489
0.278492	-0.280544	-870.269
0.253097	-0.313456	-867.489
0.199519	-0.282762	-867.489
0.204633	0.0943422	-867.489
0.207205	0.13413	-867.489
0.197191	0.151934	-867.489
0.203727	0.218002	-867.49
0.212753	0.23255	-870.269
0.277945	0.158353	-870.269
0.299475	0.148183	-867.49
0.316368	0.168468	-867.49
0.185369	0.0676779	-867.489
-0.111256	-0.175946	-787.49
-0.0943821	-0.160911	-787.49
-0.142861	-0.14864	-787.49
-0.0809934	-0.136738	-784.71
-0.109665	-0.207712	-787.49
-0.0035137	-0.0708763	-787.49
0.0166379	-0.0333804	-787.49
0.0481958	0.0090676	-787.49
-0.0946749	0.198653	-787.49
0.144545	0.0788163	-787.49
0.0906678	0.0525954	-787.49
0.173728	-0.00420726	-790.27
0.181846	0.0281362	-790.27
0.169846	0.0454824	-790.27
0.259202	0.0221819	-790.271
0.256206	-0.0666879	-790.271
0.308007	-0.00106793	-790.271
0.277644	0.0797152	-790.271
0.278295	0.101189	-790.271
0.261812	0.0909058	-787.491
0.240695	0.10037	-790.271
0.26801	0.1358	-790.271
0.243894	0.149194	-787.491
0.245912	-0.302833	-790.271
0.284963	-0.130811	-790.271
0.338919	-0.255633	-787.491
0.126407	-0.0554219	-787.49
0.102302	0.0625824	-787.49
0.17852	0.136276	-710.27
0.199704	0.134379	-707.49
0.196742	0.121924	-707.49
0.228755	0.100277	-707.49
0.24562	0.111465	-710.27
0.272583	0.0968803	-707.49
0.259334	0.167848	-707.49
0.25047	0.177363	-704.71
0.167997	0.0874027	-710.27
0.148039	0.0589498	-710.27
0.160451	0.042719	-710.27
0.116997	0.0547185	-707.49
0.0520468	0.106145	-707.49
0.0136358	0.0559394	-710.27
0.198829	0.013262	-707.49
0.219858	0.0301289	-704.71
0.204849	0.0454172	-710.27
0.215984	0.0585912	-707.49
0.219953	0.0784246	-710.27
0.212352	0.0908465	-710.27
0.210696	-0.0108261	-710.27
0.283045	-0.239644	-707.49
0.241635	-0.278483	-707.49
0.0904704	-0.105419	-707.49
-0.104346	-0.156712	-710.27
-0.0954975	-0.0743338	-710.27
-0.0740415	-0.205707	-707.49
-0.0259759	-0.191236	-704.71
-0.126701	-0.272569	-707.49
-0.158025	-0.266311	-710.27
-0.202806	0.109568	-627.49
-0.131124	-0.0162622	-630.27
-0.00430878	-0.0449607	-630.27
0.00535574	-0.0703428	-627.49
0.0450587	0.0102442	-630.27
0.0309741	0.0422284	-630.27
0.0490316	0.0647922	-627.49
0.0460811	0.183411	-633.05
0.160491	0.0747641	-630.27
0.169633	0.0428731	-630.27
0.153549	0.0222582	-627.49
0.178299	0.0031851	-630.27
0.158307	-0.0408539	-627.49
0.13903	0.270588	-633.05
0.23309	0.12611	-630.27
0.242828	0.109128	-630.27
0.265637	0.126415	-627.49
0.18463	0.121343	-630.27
0.328786	0.0128949	-630.27
0.229988	0.0444517	-630.27
0.232147	-0.00503862	-630.27
0.222309	-0.00631076	-630.27
0.261821	-0.046146	-627.49
0.220722	-0.132264	-624.71
0.205605	-0.131111	-627.49
0.26858	-0.324796	-624.71
0.293685	-0.346084	-627.49
0.300577	-0.311573	-627.49
0.174362	0.173951	-550.27
0.205101	0.154769	-553.05
0.202422	0.116691	-550.27
0.184814	0.0926894	-550.27
0.186517	0.0681998	-553.05
0.165083	0.0675819	-553.05
0.15432	0.114928	-553.05
0.208558	0.20441	-550.27
0.256658	0.15946	-550.27
0.233849	0.150068	-550.27
0.227009	0.0757973	-550.27
0.230198	-0.00382256	-550.27
0.244104	-0.0985699	-550.27
0.256425	-0.310265	-547.49
0.0752177	0.0458081	-553.05
0.0492746	0.109437	-550.27
0.132529	0.224692	-547.49
0.286026	0.177631	-550.27
0.338627	0.175308	-547.49
0.30272	0.127304	-547.49
-0.0315584	0.0603176	-550.27
-0.00281976	-0.0460043	-547.49
-0.0570732	-0.147226	-550.27
-0.14528	-0.126327	-547.49
-0.187418	-0.143157	-547.49
-0.181311	-0.231245	-550.27
-0.19614	-0.0507735	-464.71
-0.295773	0.114401	-461.93
-0.294646	0.288702	-464.71
-0.164956	-0.0751788	-467.49
-0.0358927	0.0199147	-464.71
-0.06826	0.0327828	-464.71
-0.147868	-0.175591	-464.71
0.163931	0.0010595	-467.49
0.24218	-0.057234	-467.49
0.277566	-0.195845	-467.49
0.346813	-0.340587	-470.27
0.263722	-0.298658	-467.49
0.231427	-0.23955	-467.49
0.307115	-0.00933311	-467.49
0.340034	0.16051	-470.27
0.275569	0.176167	-470.27
0.244278	0.172149	-464.71
0.229162	0.162264	-467.49
0.199002	0.14189	-464.71
0.206014	0.156266	-467.49
0.216635	0.180738	-464.71
0.257613	0.21653	-467.49
0.195915	0.175647	-470.27
0.16495	0.146498	-467.49
0.124122	0.216389	-467.49
0.109726	0.101558	-467.49
0.0904219	0.0682593	-470.27
0.0728922	0.110086	-467.49
0.107349	0.0550556	-464.71
0.139054	0.0311459	-464.71
-0.200265	-0.157936	-387.49
-0.163159	-0.104329	-384.71
-0.1514	-0.0541528	-381.93
-0.0956215	-0.19731	-381.93
-0.0721535	0.0757418	-384.71
-0.0606908	0.0116007	-387.49
0.097962	0.168643	-387.49
0.0789611	0.0260966	-387.49
0.193507	0.0130585	-387.49
0.247952	0.0256524	-387.49
0.350396	0.0568244	-387.49
0.3475	0.00643104	-387.49
0.269944	0.173599	-387.49
0.305284	0.115075	-384.71
0.329959	0.188931	-387.49
0.276396	0.186663	-384.71
0.240338	0.201102	-384.71
0.243626	0.268959	-384.71
0.203473	0.168952	-387.49
0.221586	0.143845	-384.71
0.220297	0.123442	-387.49
0.206176	0.107194	-387.49
0.196819	0.0919061	-384.71
0.187435	0.0452367	-387.49
0.165498	0.0752526	-387.49
0.157041	0.0608896	-381.93
0.139771	0.0716558	-387.49
0.134233	0.0534723	-387.49
0.131751	0.0315329	-384.71
0.144574	0.0307357	-387.49
0.378227	0.0581812	-390.27
-0.211727	0.10984	-387.49
-0.110807	-0.244065	-304.71
-0.121254	-0.163429	-304.71
-0.0543872	-0.149893	-307.49
-0.201642	-0.160583	-304.71
-0.040917	0.0216184	-304.71
0.115073	0.13513	-307.49
0.0749115	0.162389	-307.49
0.118921	0.219186	-307.49
0.149283	0.208218	-304.71
0.166519	0.201856	-307.49
0.211245	0.209006	-307.49
0.270393	0.212635	-307.49
0.259848	0.18601	-307.49
0.271469	0.181691	-307.49
0.264356	0.159578	-307.49
0.335374	0.113946	-307.49
0.301836	0.0510149	-307.49
0.220795	0.0971427	-307.49
0.213122	0.046039	-307.49
0.250246	-0.0236996	-307.49
0.195225	-0.10414	-307.49
0.269964	-0.101219	-307.49
0.210578	-0.176657	-307.49
0.362775	-0.0561664	-307.49
0.175837	0.106853	-307.49
0.278834	-0.374174	-310.27
0.225882	-0.374369	-310.27
0.238732	0.285696	-224.71
0.217611	0.247484	-227.49
0.242076	0.200575	-230.27
0.212878	0.141602	-230.27
0.257666	0.159108	-230.27
0.326045	0.178762	-230.27
0.115285	0.240705	-227.49
0.0744189	0.214589	-230.27
0.0758825	-0.0513879	-230.27
0.292256	-0.333757	-230.27
0.270313	-0.344731	-230.27
-0.163063	-0.0742857	-230.27
-0.144288	-0.212269	-224.71
-0.138056	0.0613827	-227.49
-0.0807147	0.084424	-230.27
-0.178972	0.263971	-227.49
0.19581	0.110875	-230.27
-0.126644	-0.186753	-147.49
-0.0937292	-0.162788	-150.27
-0.0572287	-0.164796	-144.71
-0.0125567	-0.0909265	-147.49
-0.0652975	-0.0568677	-144.71
-0.186943	-0.013672	-150.27
-0.167516	0.105028	-147.49
0.192389	-0.297019	-147.49
0.326075	-0.280236	-147.797
0.161427	-0.289183	-147.49
0.179145	-0.127443	-144.71
0.134461	-0.129699	-147.49
0.115804	-0.122437	-144.71
0.165367	0.0476573	-147.49
0.198841	0.0315548	-147.49
0.24237	0.0679457	-144.71
0.239996	0.135314	-144.71
0.263344	0.185509	-147.49
0.254888	0.183866	-144.71
0.227271	0.223471	-147.49
0.282233	0.29304	-143.577
0.0898301	0.19055	-144.71
0.0615281	0.113165	-144.71
0.212167	0.223703	-144.71
0.0687095	0.0863588	-147.49
0.11888	0.129536	-144.71
0.22027	0.139076	-147.49
0.192979	0.132566	-147.49
0.11957	0.0200889	-144.71
0.275977	0.338835	-67.49
0.251109	0.210034	-64.71
0.243887	0.178299	-64.71
0.210732	0.194057	-64.71
0.198313	0.18742	-64.71
0.195192	0.169432	-67.49
0.201786	0.158355	-67.49
0.237814	0.0945576	-67.49
0.300485	0.134944	-64.71
0.194455	0.0921015	-67.49
0.178823	0.137349	-67.49
0.146145	0.185696	-67.49
0.144973	0.127743	-64.71
0.138885	0.0921356	-64.71
0.112134	0.0889653	-67.49
0.103986	0.0483091	-67.49
0.0820329	0.041975	-67.49
0.0514769	0.0723544	-67.49
0.058112	0.036982	-67.49
0.149764	-0.00131068	-67.49
0.0767384	-0.0575006	-67.49
0.0566906	-0.104221	-67.49
0.0253465	-0.0611259	-70.27
0.270238	-0.295943	-64.71
0.351785	-0.251788	-67.49
0.0820356	0.0963155	-67.49
-0.171882	-0.1752	-70.27
-0.165233	-0.242697	-67.49
-0.145621	-0.213237	-70.27
-0.0797923	-0.0974298	-67.49
-0.0984533	-0.0967555	9.73
-0.116303	0.210645	9.73
0.11023	0.0466184	9.73
0.164368	-0.0260167	12.51
0.177907	0.0485715	15.29
0.215961	0.0492267	12.51
0.247379	-0.00508548	12.51
0.264793	0.0122054	15.29
0.26357	0.101556	12.51
0.233774	0.132721	12.51
0.238183	0.153316	15.29
0.233989	0.176248	12.51
0.20713	0.169187	15.29
0.197141	0.117538	12.51
0.232234	0.229852	15.29
0.280426	0.199191	12.51
0.259159	0.169679	12.51
0.208069	0.0829751	12.51
-0.154428	-0.0748826	92.51
-0.117834	-0.060704	95.29
0.0938381	0.0844569	92.51
0.0817057	0.175642	89.73
0.150703	0.0620651	89.73
0.135608	0.0132068	95.29
0.111988	-0.0275022	95.29
0.170362	-0.0382114	95.29
0.220099	-0.0106886	89.73
0.199853	0.0425759	92.51
0.223085	0.0409325	92.51
0.243258	-0.0121213	92.51
0.259996	-0.0103866	92.51
0.29235	0.00495917	92.51
0.330083	0.00612436	95.29
0.237249	0.159973	92.51
0.198123	0.227093	92.51
0.379536	-0.0569662	92.51
0.254979	-0.265465	92.51
0.307472	-0.292975	92.51
0.207184	0.108133	92.51
-0.0787614	-0.0774622	175.29
0.096896	0.0273221	175.29
0.145391	0.012363	169.73
0.199653	-0.068068	172.51
0.141777	-0.0861218	175.29
0.237314	-0.292174	172.51
0.283287	-0.346178	172.51
0.186426	0.0264338	169.73
0.116993	0.114604	172.51
0.0931321	0.289102	175.29
0.229278	0.155806	172.51
0.25135	0.120829	169.73
0.253998	0.104812	169.73
0.28691	0.0963346	172.51
0.314313	0.0764759	169.73
0.350065	0.0699081	172.51
0.330038	0.140435	169.73
0.393884	0.0907443	169.73
0.243928	-0.0438253	249.73
0.218953	-0.147209	252.51
0.288251	-0.192376	249.73
0.399981	-0.266288	252.51
0.401047	-0.219639	249.73
0.384449	-0.139369	252.51
0.309773	-0.310533	252.51
0.246572	-0.323873	252.51
0.159759	-0.0770803	252.51
0.10954	-0.0989276	252.51
0.0658793	0.0131101	252.51
-0.0360114	0.0211447	252.51
-0.0479482	0.0508859	255.29
0.125414	0.127686	249.73
0.145926	0.0969217	252.51
0.162126	0.0698338	255.29
0.193517	0.101331	255.29
0.168288	0.252509	249.73
0.237566	0.17551	252.51
0.230075	0.0980052	252.51
0.258354	0.0861316	252.51
0.250814	0.00388522	249.73
0.206857	-0.0305179	252.51
0.324055	-0.0234288	252.51
0.245056	0.0799906	252.51
0.220823	0.0755992	252.51
0.310928	0.197352	246.95
0.143152	0.127871	332.51
0.136555	0.154951	332.51
0.107081	0.136743	329.73
0.151288	0.0792723	329.73
0.165172	0.0375234	329.73
0.0491066	0.0755834	332.51
0.133502	0.297414	329.73
0.23619	0.194387	332.51
0.224073	0.30057	332.51
0.280471	0.125694	329.73
0.28235	0.157166	332.51
0.206597	0.109256	332.51
0.261498	0.0454796	329.73
0.316301	-0.021826	329.73
0.332603	-0.0535414	329.73
0.386436	-0.0395917	329.73
0.259265	-0.320858	329.73
0.343282	-0.328886	329.73
0.262651	-0.230787	329.73
0.285138	0.17593	412.51
0.275198	0.151229	415.29
0.271847	0.111284	412.51
0.246358	0.0964109	409.73
0.253869	0.0706283	412.51
0.259328	0.0418453	412.51
0.205452	0.117235	409.73
0.20957	0.0151229	409.73
0.13938	0.120866	409.73
0.0869044	0.0866147	412.51
0.074493	0.0206773	409.73
0.0466561	-0.00610421	412.51
0.0161083	0.00739262	409.73
0.113948	-0.0507442	412.51
0.0232173	0.01562	412.51
-0.00475499	-0.0971552	412.51
-0.17677	0.244103	409.73
0.313909	-0.169528	412.51
0.289922	-0.195484	412.51
0.333299	-0.189421	409.73
0.258037	-0.107437	412.51
0.225356	-0.0598795	409.73
0.177306	-0.0370123	412.51
0.20057	0.196777	412.51
0.183239	-0.124891	495.29
0.200616	-0.0826203	511.97
0.139832	-0.127668	492.51
0.120008	-0.118709	495.29
0.170958	-0.290521	492.51
0.202781	-0.298717	492.51
0.268929	-0.378228	511.97
0.327899	-0.261192	511.97
0.349468	-0.179509	509.19
0.379559	-0.0693711	511.97
0.27023	0.0854145	509.19
0.26045	0.130074	509.19
0.24383	0.0428357	509.19
0.274241	0.0202555	511.97
0.228642	0.0180458	509.19
0.199386	0.022906	509.19
0.206908	0.0387571	492.51
0.17078	0.0487167	506.41
0.1546	-0.000975727	509.19
0.105345	-0.00319181	506.41
0.117627	0.0690635	509.19
0.0751157	0.0825016	492.51
0.0672852	0.0575749	509.19
0.0639003	0.114734	495.29
0.117527	0.126809	495.29
0.0911852	0.190941	495.29
0.214108	0.221216	495.29
0.228726	0.220387	495.29
0.265535	0.184835	492.51
0.251495	0.201549	495.29
0.282682	0.287825	498.07
0.226463	0.140324	506.41
0.244985	0.133149	495.29
0.238609	-0.0825135	511.97
-0.123491	-0.192382	492.51
-0.0540624	-0.163929	495.29
-0.00806377	-0.0920607	492.51
0.00178811	-0.127452	509.19
-0.169572	0.105371	492.51
-0.185364	-0.0192696	489.73
0.23842	-0.192198	511.97
0.1357	-0.0946988	509.19
0.241568	0.231658	566.95
0.228537	0.188746	569.73
0.232447	0.162473	566.95
0.226101	0.143876	569.73
0.229924	0.125811	569.73
0.196679	0.127002	569.73
0.189868	0.166249	569.73
0.152334	0.207939	569.73
0.0813307	0.18715	566.95
0.0726953	0.262022	569.73
0.124474	0.075054	566.95
0.131194	0.045885	569.73
0.163193	0.0365901	569.73
0.0769227	0.0395641	569.73
0.00715497	-0.0519173	572.51
0.113509	-0.211209	569.73
0.255232	-0.248218	575.29
0.281677	-0.110314	569.73
0.328269	-0.311277	569.73
0.333202	-0.280884	572.51
0.336241	-0.0642847	572.51
0.385903	-0.0218178	569.73
0.299929	0.0492781	569.73
0.331815	0.0973129	569.73
-0.120322	-0.107853	652.51
0.0388712	-0.0119393	652.509
0.0547685	0.00549825	652.509
0.139813	-0.0320223	652.509
0.246556	-0.304389	652.51
0.27869	-0.0747449	655.289
0.293456	0.00742226	652.509
0.271171	0.0902574	655.289
0.261152	0.148387	649.728
0.220668	0.180708	649.728
0.287915	0.25588	652.508
0.251812	0.205725	652.508
0.349105	0.0787839	652.509
0.367332	-0.0308695	652.509
0.127305	0.0952168	649.729
0.0981153	0.13966	652.509
0.10829	0.160614	652.509
0.157187	0.0689242	649.729
0.176528	0.0301987	652.509
-0.21387	-0.116115	735.29
-0.0934695	-0.104391	735.29
0.124748	-0.0919629	735.29
0.244081	-0.177858	732.51
0.366285	-0.279396	735.29
0.392162	-0.210872	732.51
0.345855	-0.0687365	732.51
0.292268	-5.29242e-05	732.51
0.302786	0.0426574	732.51
0.259979	0.104032	732.51
0.257419	0.0846007	732.51
0.246407	0.126213	732.51
0.226539	0.126404	732.51
0.200809	0.109791	732.51
0.213788	0.0454466	729.73
0.225385	0.0440524	732.51
0.214724	-0.0421775	732.51
0.184566	-0.0277276	735.29
0.186332	0.00811147	732.51
0.163323	0.0543639	729.73
0.163875	0.0861508	732.51
0.152283	0.0856144	732.51
0.115991	0.119688	732.51
0.0850373	0.142685	732.51
0.0917809	0.0686876	732.51
0.224597	0.196049	815.29
0.199191	0.203166	815.29
0.198141	0.179335	812.51
0.125497	0.174368	812.51
0.201449	0.12615	812.51
0.220927	0.0418784	812.51
0.311504	-0.0151164	818.07
0.297984	-0.136299	815.29
0.281523	-0.166012	812.51
0.235991	-0.225328	815.29
0.256372	-0.259366	812.51
0.1891	0.00439525	815.29
0.0780295	0.0459938	812.51
0.0427241	0.00937372	812.51
-0.133328	-0.179016	812.51
-0.131036	-0.0990408	812.51
-0.167505	-0.178824	812.51
-0.0995068	-0.178526	812.51
0.19795	0.117233	892.51
0.25396	0.140913	889.73
0.260426	0.0901986	892.51
0.269478	0.0689363	895.29
0.249732	0.0736042	892.51
0.251961	0.0549668	892.51
0.26681	0.00565238	892.51
0.317914	-0.0346155	892.51
0.335689	0.0227811	892.51
0.253722	-0.0960426	892.51
0.255908	-0.150563	892.51
0.226936	0.0391937	895.29
0.168035	0.0430849	892.51
0.131005	0.0934467	892.51
0.105954	0.150171	889.73
0.261063	-0.338359	892.51
-0.142358	-0.297451	895.29
0.229572	0.0617504	972.51
0.206762	-0.0530329	972.51
0.280656	-0.0384959	975.29
0.295528	-0.109657	972.51
-0.138612	-0.24329	972.51
0.124878	0.0673252	972.51
0.0705262	0.118888	969.73
0.0831389	0.243791	969.73
0.264704	0.15429	972.51
0.204903	0.17207	969.73
0.203603	0.140861	972.51
0.197687	0.121945	972.51
0.195322	0.0937161	972.51
0.160987	0.0979201	972.51
0.193559	0.00803907	969.73
0.0608007	0.058473	972.51
0.303638	-0.149617	975.29
0.274006	0.281785	1052.51
0.198672	0.271238	1052.51
0.209273	0.176385	1052.51
0.220233	0.171988	1052.51
0.230315	0.175398	1055.29
0.229204	0.0953997	1052.51
0.259966	0.0650215	1052.51
0.159863	0.0566288	1052.51
0.0935756	0.180532	1049.73
0.0656693	0.185547	1049.73
0.0928962	0.0844972	1052.51
0.248822	0.0401915	1052.51
0.276144	0.0121498	1055.29
0.247794	-0.042335	1055.29
0.203695	-0.0646696	1055.29
0.222	-0.0692289	1055.29
0.330624	-0.0222485	1055.29
0.372871	-0.094888	1055.29
0.198187	-0.143112	1055.29
0.0483269	0.0329043	1052.51
0.0284796	0.0117144	1052.51
0.281888	0.130029	1135.29
0.283409	0.0764254	1135.29
0.262795	0.124423	1135.29
0.307577	0.180039	1132.51
0.226808	0.159006	1132.51
0.199322	0.130891	1132.51
0.181799	0.153672	1132.51
0.198994	0.194145	1132.51
0.210049	0.22515	1135.29
0.145611	0.107917	1135.29
0.106365	0.0720579	1132.51
0.0642945	0.051118	1132.51
0.268454	-0.124726	1132.51
-0.070669	-0.014675	1132.51
0.306847	0.107251	1209.73
0.252875	0.171484	1212.51
0.202075	0.133008	1212.51
0.178308	0.171126	1212.51
0.22447	0.072864	1212.51
0.262382	0.0419687	1209.73
0.293522	0.033719	1212.51
0.365886	-0.0711004	1209.73
0.281316	-0.322487	1209.73
0.251652	-0.300578	1209.73
0.155826	0.0291531	1212.51
0.121671	0.0289459	1215.29
0.335273	-0.167109	1209.73
0.420309	-0.0517966	1286.95
0.409551	-0.135791	1289.73
0.279284	0.0570737	1289.73
0.202533	-0.0535216	1289.73
0.136584	0.0388447	1292.51
0.183242	0.149195	1289.73
0.222125	0.171958	1289.73
0.220075	0.213835	1289.73
0.205846	0.232207	1292.51
0.0647938	0.0213704	1292.51

## Sheet: Sheet2
0.330397	-0.0848237	-1350.27
0.367169	-0.114062	-947.498
0.364268	-0.168162	-870.269
0.347287	-0.183743	-870.269
0.302699	-0.137524	-707.49
0.351257	-0.0944437	-630.27
0.346438	-0.0567975	-630.27
0.358191	-0.191006	-630.27
0.326179	-0.263893	-547.49
0.342987	-0.263192	-550.27
0.361584	-0.0467507	-470.27
0.290876	-0.224792	-470.27
0.370825	-0.0973373	-390.27
0.356888	-0.145616	-387.49
0.183987	-0.315925	-307.49
0.383293	-0.154662	-310.27
0.374856	-0.105422	-227.49
0.360758	-0.148011	-142.282
0.305402	-0.0986857	-67.49
0.356737	-0.236453	81.39
0.340431	-0.197565	326.95
0.319315	-0.246834	412.51
