# Supplementary material for: Spinal premotor interneurons controlling antagonistic muscles are spatially intermingled
Source: eLife. 2022 Dec 13;11:e81976. doi: 10.7554/eLife.81976 (PMC9844990; doi:10.7554/eLife.81976)
Supplement: Figure 12—figure supplement 6—source data 1. — The x-y coordinates are normalized (between –0.5 and 0.5) and scaled to an idealized spinal cord of dimensions 1700 μm and 900 μm in the mediolateral and dorsoventral directions respectively, while z coordinates are in micron, with the axis origin taken at the border between L4 and L5 and negative values in the rostral direction. [file elife-81976-fig12-figsupp6-data1.xlsx]

## Sheet: Sheet1
0.196442	0.116666	-4038
0.346393	-0.0378098	-4030
0.257942	-0.0860556	-4008
0.2593	0.232149	-3538
0.04588	-0.0137613	-3544
-0.1878	-0.0474743	-3540
-0.0728192	-0.0915867	-3050
-0.0601739	-0.0861167	-3050
-0.109776	-0.169965	-2590
0.128332	0.27033	-2588
0.215749	0.000212012	-2590
0.0233589	-0.0934064	-2590
0.110343	0.0587955	-2564
-0.190742	-0.0570161	-2590
-0.106009	-0.124234	-2112
-0.140696	0.0306766	-2106
-0.0693915	-0.0721829	-2102
-0.101974	-0.185168	-2086
0.000701392	0.119523	-2100
0.0284151	0.090442	-2098
0.0878363	0.202483	-2086
0.160045	0.102964	-2102
0.114141	0.142733	-2112
0.225976	0.205786	-2114
0.19126	0.116251	-2120
0.105846	-0.119426	-2112
0.239447	0.0277407	-2100
-0.145965	-0.111368	-1606
-0.180725	-0.0743782	-1610
-0.107234	-0.0786168	-1616
-0.0690152	-0.0724321	-1628
0.0307069	0.0252842	-1630
0.045865	0.0259255	-1628
0.162756	-0.0570258	-1640
0.304264	0.128345	-1612
0.306973	0.108368	-1610
0.270201	0.117605	-1628
0.315784	0.016689	-1630
0.397768	-0.130188	-1622
0.277747	0.252503	-1126
0.242022	0.300906	-1128
0.333719	-0.187524	-1142
0.363614	-0.239695	-1138
0.342917	-0.248957	-1126
0.250236	0.191459	-1126
0.168554	0.244647	-1126
0.277758	0.161182	-1126
0.241755	0.185934	-1126
0.254849	0.230326	-1126
0.301267	0.242393	-1126
0.21619	0.105381	-1126
0.0693158	0.188754	-1126
0.30762	0.150507	-1124
-0.117929	0.216059	-1134
0.314689	-0.0171178	-1136
0.263169	0.042015	-1130
0.252643	0.119633	-1126
0.2849	0.0977625	-1122
0.28266	0.0287716	-1108
0.25421	0.0863684	-1118
0.174173	0.0177826	-1126
0.218996	0.0867505	-1132
0.216595	0.0687768	-1136
0.201412	0.0372465	-1122
0.13513	0.0371395	-1138
0.128533	0.00910147	-1134
0.13433	0.0860551	-1118
0.13453	0.103096	-1116
0.132129	0.0280686	-1112
0.0447785	0.00580018	-1140
0.0497749	-0.0433905	-1138
-0.257522	-0.00791698	-1132
0.201951	-0.0840147	-1122
0.259368	-0.224503	-1124
0.219724	-0.10477	-1130
0.161596	-0.0540127	-1138
0.275174	-0.287892	-1116
-0.099611	-0.175243	-1140
-0.0559217	-0.109348	-1134
-0.110393	-0.182916	-1118
-0.00257322	-0.0739504	-1114
0.201447	0.247562	-644
0.146454	0.295782	-650
0.223807	0.203242	-646
0.218034	0.189538	-658
0.18085	0.28409	-666
0.196975	0.0950444	-654
0.287402	0.0947433	-652
0.14292	0.192395	-674
0.0843621	0.215462	-670
0.238407	-0.00129252	-664
0.290974	0.0282666	-658
0.198835	0.0673139	-644
0.207838	0.0178162	-648
0.23418	0.0974017	-680
0.138747	0.0664253	-654
0.191415	0.0144748	-676
0.0363364	0.0698329	-652
-0.114323	-0.0879061	-674
-0.125378	-0.195428	-666
-0.148618	-0.207508	-676
-0.184278	-0.186953	-662
-0.164519	-0.162711	-666
-0.0932476	-0.105987	-660
-0.10216	-0.148684	-658
-0.104244	-0.134099	-648
-0.113689	-0.256044	-664
-0.358737	0.219222	-650
-0.254184	0.273089	-654
0.32351	-0.147259	-680
0.2554	-0.072954	-662
0.337283	-0.152172	-642
0.265884	-0.282754	-650
0.257313	-0.255978	-656
0.07408	-0.299909	-674
0.397083	0.0625184	-660
0.410862	-0.160243	-680
0.19328	0.245321	-194
0.228943	0.253077	-200
0.239113	0.263896	-204
0.316599	0.191048	-168
0.206867	0.188079	-168
0.103566	0.179481	-176
0.0876199	0.19531	-178
0.18001	0.182538	-178
-0.133331	0.241227	-192
-0.263717	0.277725	-184
-0.085351	0.101839	-194
-0.147452	0.0760059	-188
-0.191619	-0.00958742	-192
-0.201028	-0.103893	-184
-0.0900845	-0.142593	-182
-0.053782	-0.0996243	-170
-0.157988	-0.17188	-164
-0.140556	-0.219353	-182
-0.117444	-0.182255	-198
-0.0745142	-0.155748	-192
-0.0642486	-0.132911	-174
0.343789	0.0611063	-186
0.374872	0.0427731	-176
0.251208	0.127545	-176
0.19887	0.106202	-172
0.250812	0.0310783	-170
0.198405	0.0504619	-170
0.161928	0.0744708	-172
0.266594	0.126474	-170
0.305937	0.128757	-196
0.252536	0.0840852	-196
0.196966	0.148551	-196
0.145533	0.0593895	-190
0.073192	0.199673	-188
0.0463565	0.0307484	-180
0.155846	0.0179562	-178
0.135315	0.106653	-202
0.0940458	0.168823	-204
0.114228	0.0617863	-206
0.00776399	-0.077891	-168
0.158829	-0.247859	-168
0.15465	-0.233814	-162
0.229662	-0.224591	-160
0.222882	-0.278702	-178
0.110087	-0.260624	-184
0.277029	-0.315267	-176
0.257143	-0.318546	-166
0.190054	-0.166225	-172
0.19466	-0.143636	-170
0.259597	-0.238507	-172
0.361364	-0.196751	-200
0.37035	-0.130743	-198
0.225685	-0.144693	-196
0.325189	-0.0489403	-206
0.312099	-0.0446582	-208
0.289098	-0.183999	-204
0.311755	-0.312002	-186
0.298194	0.0283314	-206
0.204799	0.166676	-206
0.218042	0.166649	-206
0.257724	0.138189	-204
-0.0931415	-0.131187	-182
-0.180633	0.0485722	300
-0.248597	0.229088	296
-0.0849978	0.0725896	280
-0.122991	0.0375255	282
-0.235367	0.0333324	280
-0.0827679	-0.170557	310
-0.105163	-0.209681	312
-0.00110962	-0.0409291	316
-0.0581269	-0.0878958	282
-0.155955	-0.200267	288
-0.0735762	-0.0287678	288
0.049666	0.0181524	314
0.0486311	0.00550675	314
0.0414239	-0.00933494	316
0.0696232	-0.0151801	310
0.0595139	0.000922215	308
0.0583083	-0.0817255	288
0.0660222	0.0520222	292
0.13118	0.0286019	288
0.195426	0.0306786	284
0.148705	-0.0033903	280
0.0233606	0.0292853	278
0.276802	-0.112942	280
0.152695	0.0431252	302
0.475204	0.0167657	304
0.274401	-0.151343	300
0.179379	-0.0902776	288
0.15031	0.0130371	310
0.116131	0.0636262	308
0.207936	0.0743213	312
0.256194	0.0311364	314
0.250021	0.0547424	290
0.0640857	0.0637987	290
0.179016	0.126735	290
0.21215	0.09392	304
0.148715	0.0919296	302
0.0816849	0.0701016	286
0.142986	0.0678127	278
0.238216	0.157626	306
0.273062	0.240944	300
0.291669	0.140243	300
0.317783	0.181962	280
0.222804	0.140661	278
-0.100175	-0.104602	278
0.287939	0.227186	762
0.300777	0.276485	760
0.379302	0.207396	770
0.353437	0.168375	772
0.225865	0.134357	774
0.242016	0.213848	778
0.229193	0.107687	794
0.283153	0.125203	772
0.201778	0.126158	764
0.174968	0.0488637	794
0.18768	0.0519692	790
0.195367	0.0681792	790
0.208647	0.0645733	790
0.152436	0.117244	780
0.0401362	0.0383061	792
0.0366306	0.0894502	792
0.0966265	0.0847074	770
0.10408	0.0917891	770
0.184357	0.108714	770
0.242773	0.0715121	780
-0.0774018	0.010694	764
-0.0451913	0.0159371	786
-0.146726	-0.104094	784
-0.272799	-0.0968568	760
-0.29338	0.0779701	762
-0.134522	-0.165432	756
-0.0952954	-0.093082	754
-0.0428492	-0.142836	760
-0.125428	-0.0292493	792
0.00236753	-0.0612469	768
0.191231	-0.0908861	782
0.162765	-0.024539	758
0.35805	-0.184598	794
0.357603	-0.018159	790
0.306635	-0.0369093	770
0.251247	0.0310425	758
0.297643	0.000670174	1268
0.178957	0.188169	1268
0.110776	0.270867	1268
0.359389	0.19774	1268
0.264717	0.209975	1256
0.285491	0.222481	1248
0.369401	0.233365	1244
0.294468	0.197668	1244
0.146684	0.191969	1250
0.114029	0.169593	1254
-0.0284508	-0.0319302	1264
0.0359984	0.116688	1244
-0.0034278	0.094046	1238
-0.191058	-0.0932207	1258
-0.230051	0.153359	1256
-0.009268	0.134539	1254
-0.20484	-0.0848186	1262
-0.136097	0.140565	1266
-0.0808638	0.102149	1252
0.214231	-0.0862498	-4038
0.208923	-0.0745911	-4030
0.287541	-0.0162186	-4030
0.205118	-0.0304305	-4008
0.19802	0.0340657	-3558
0.186033	-0.231144	-3538
-0.189532	-0.0111474	-3054
0.276445	-0.0233573	-3070
-0.108209	0.116788	-2572
-0.135398	0.0808674	-2576
0.290169	-0.020974	-2566
0.219376	0.0342096	-2600
0.276537	-0.0311355	-2604
0.229549	0.0278569	-2600
-0.245638	0.23504	-2116
0.25966	0.0706775	-2100
0.216991	0.000681536	-2120
0.340094	0.0192253	-2118
0.25158	0.0275535	-2112
0.284249	-0.0241234	-2104
0.196993	-0.0276359	-2096
0.330298	0.0199817	-2090
-0.165907	-0.0276578	-1606
-0.230292	-0.0585369	-1620
-0.116641	-0.111523	-1620
0.174642	-0.0269133	-1630
0.0134355	0.0453051	-1636
0.302874	0.0323313	-1606
0.160515	0.116351	-1608
0.233283	0.0901753	-1614
0.353004	-0.00342774	-1612
0.102348	0.147577	-1624
0.237477	-0.05721	-1634
0.288203	-0.0360613	-1634
0.278706	-0.0337909	-1640
0.232719	-0.203165	-1604
0.0764297	0.204099	-1130
0.0884233	0.220231	-1128
0.140427	0.287243	-1130
0.265387	-0.134673	-1156
0.286578	-0.119763	-1156
0.216768	-0.209884	-1154
0.249453	-0.274924	-1126
0.349325	-0.101698	-1126
0.189829	0.175091	-1126
0.147574	0.165683	-1126
0.180459	0.266946	-1126
0.194442	0.209662	-1126
0.19716	0.150682	-1126
0.187523	0.140068	-1126
0.180876	0.180539	-1126
0.193486	0.162145	-1126
0.161513	0.177796	-1126
-0.206753	0.224037	-1112
0.326338	0.0460193	-1114
0.354566	0.00443993	-1120
0.327905	0.0352367	-1122
0.365092	-0.0331352	-1124
0.292964	-0.0226658	-1132
0.306853	0.0805148	-1130
0.277958	0.058338	-1126
0.240605	0.015215	-1122
0.201245	0.134214	-1130
0.276185	0.0797735	-1128
0.0603735	0.0725901	-1122
0.115739	0.126733	-1118
0.11594	0.117662	-1122
0.0645696	0.0918324	-1138
-0.00352915	0.0488851	-1134
-0.213739	-0.0243012	-1112
0.338226	-0.0880802	-1138
0.345623	-0.10072	-1118
0.324326	-0.0883859	-1118
0.275013	-0.128766	-1114
0.180476	-0.0501307	-1130
0.213477	-0.180371	-1108
0.301189	-0.26243	-1140
0.243356	-0.222814	-1140
-0.206241	-0.142689	-1138
-0.17025	-0.100613	-1108
-0.159662	-0.144019	-1106
0.0813665	0.229378	-642
0.224601	0.169313	-658
0.0625027	0.186351	-652
0.220358	0.220823	-676
0.255703	0.0734974	-656
0.26686	0.108675	-644
0.190653	0.152371	-644
0.190242	-0.0650887	-648
0.177178	-0.0719773	-646
0.244547	0.151298	-680
0.219346	0.140231	-674
0.210306	0.14087	-664
0.223008	0.14452	-668
0.208728	0.103798	-662
0.0858652	0.129458	-666
0.194613	0.151056	-674
0.0971973	0.0646628	-680
0.00218541	-0.0690103	-674
-0.176123	-0.150704	-664
-0.166891	-0.0852917	-654
-0.201548	-0.214625	-646
-0.228354	-0.170385	-662
-0.135389	0.309941	-662
-0.159402	0.117333	-670
0.356755	-0.0814876	-664
0.274722	-0.0343693	-668
0.211366	-0.199048	-678
0.242916	-0.255501	-680
0.186165	-0.222424	-682
0.19787	-0.176892	-678
0.320434	-0.0563201	-674
0.238545	-0.199474	-646
0.250101	-0.264387	-650
0.216046	-0.230399	-648
0.190839	-0.198086	-652
0.242388	-0.302538	-660
0.245341	-0.222798	-658
0.23265	0.0189398	-682
0.186807	0.219858	-204
-0.0839125	0.293076	-192
-0.277108	0.0605475	-188
-0.0735675	0.00467925	-198
-0.155227	-0.0218814	-182
-0.177445	-0.0175522	-180
0.315203	0.0473715	-182
0.212203	0.159034	-178
0.242223	0.179629	-178
0.250828	0.190375	-180
0.166545	0.107623	-178
0.270053	0.0103886	-190
0.181497	0.0663444	-198
0.157237	0.186019	-198
0.194449	0.138634	-194
0.19428	0.169483	-196
0.0392484	0.0622442	-170
0.174595	0.0409822	-180
0.0919092	-0.000538619	-198
0.0949079	-0.0488864	-194
0.247221	0.00805235	-196
0.0595204	-0.131228	-182
0.0609537	-0.116624	-166
0.207576	-0.278466	-186
0.198331	-0.219696	-194
0.223596	-0.219925	-198
0.208803	-0.157634	-172
0.302404	-0.186732	-170
0.200764	-0.150234	-186
0.309465	-0.139206	-186
0.181957	-0.118355	-192
0.156502	-0.0121997	-186
0.199933	0.102216	-188
0.266969	-0.267774	-176
-0.166736	-0.120757	306
-0.0420748	-0.0842467	310
-0.113149	-0.0755553	290
0.0799298	-0.169781	300
0.214444	-0.159358	300
0.216103	-0.122602	300
0.185685	-0.179467	306
0.199752	-0.0153725	296
0.166315	-0.104257	286
0.21286	-0.131671	292
0.227338	-0.153459	282
0.226703	-0.169051	280
0.229355	-0.201487	278
0.219331	-0.216674	306
0.240088	-0.250464	306
0.395525	-0.145637	304
0.262435	-0.169727	310
0.287162	-0.280261	304
0.296295	-0.273679	304
0.30881	0.0358934	296
0.0998015	0.107561	290
0.134845	0.0901449	306
0.232886	-0.0272286	280
0.257634	-0.00904302	280
0.301528	-0.0218943	278
0.29263	0.00920225	286
0.189424	-0.0836562	308
0.137363	0.139533	298
0.0971342	0.170471	304
0.0891268	0.188351	294
0.102245	0.091777	278
0.0894682	0.200061	284
0.180478	0.162774	286
0.189905	0.133595	284
0.122234	0.235676	302
0.194855	0.11198	310
0.263764	0.148444	284
0.221597	0.222742	760
0.292557	0.203582	788
0.33029	0.113392	782
0.204522	0.140607	782
0.19119	0.144155	784
0.210695	0.0869099	796
0.311091	0.130388	772
0.282645	0.107902	770
0.32588	0.0705441	772
0.317574	0.118531	766
0.132277	0.213588	780
0.144587	0.209085	758
0.224483	0.162034	758
0.18957	0.0965059	780
0.110893	0.107051	784
0.159214	0.146896	788
0.160606	0.0829403	762
0.0733476	0.0860198	764
-0.100107	0.046122	794
-0.152512	-0.0241362	794
-0.25174	-0.0951156	780
-0.142321	-0.0575306	782
-0.142676	-0.120285	764
-0.119164	-0.120597	756
-0.102291	-0.198697	788
-0.162912	-0.166732	788
0.194066	0.0302694	774
0.111462	-0.189075	772
0.205985	-0.192713	780
0.18957	-0.153017	784
0.310679	-0.089931	790
0.374094	-0.106173	786
0.393634	-0.0569329	788
0.293771	-0.084636	778
0.15202	0.13604	1248
0.384347	0.0478926	1248
0.217187	0.0552589	1248
0.289811	0.0201994	1244
0.329185	0.0400554	1242
0.226972	0.118061	1242
0.208106	0.122044	1242
0.265441	0.059856	1270
0.334398	0.0870341	1270
0.268358	0.137042	1236
0.158048	0.124232	1238
0.288912	-0.210352	1250
0.133102	-0.215281	1248
0.254957	-0.248097	1250
0.214432	-0.0270174	1268
0.344908	-0.128762	1270
0.142564	0.0785267	1248
0.0451823	0.0721518	1260
-0.204019	0.102332	1264
-0.255365	-0.169399	1236

## Sheet: Sheet2
0.289201	-0.146418	-1146
0.29629	-0.164326	-170
0.332757	-0.171362	-182
0.276558	-0.186941	-200
0.321836	-0.0432828	786
0.311675	-0.0398654	768
