# Supplementary material for: Spinal premotor interneurons controlling antagonistic muscles are spatially intermingled
Source: eLife. 2022 Dec 13;11:e81976. doi: 10.7554/eLife.81976 (PMC9844990; doi:10.7554/eLife.81976)
Supplement: Figure 12—figure supplement 6—source data 2. [file elife-81976-fig12-figsupp6-data2.xlsx]

## Sheet: Sheet1
0.203789	0.0870824	-5032
0.269017	0.0749257	-5038
0.243075	-0.0513717	-5010
0.115186	0.146873	-5016
0.0346819	0.011097	-5006
-0.0941354	-0.103102	-5034
-0.0887161	-0.0739412	-5024
0.256462	0.291661	-4546
0.0857866	0.0261019	-4534
0.169079	0.0512118	-4532
-0.149186	-0.14166	-4552
-0.102518	-0.125859	-4542
-0.0764189	-0.124907	-4530
0.231197	0.0425323	-4074
0.454776	0.149029	-4058
0.265413	0.191074	-3564
0.241256	0.0572627	-3566
0.272434	0.121733	-3586
0.218314	0.13121	-3592
0.318377	0.0427654	-3596
-0.0707919	-0.0758136	-3564
-0.0251471	-0.00113931	-3592
-0.140475	-0.112115	-3590
-0.208337	-0.165216	-3598
-0.148611	-0.229703	-3596
0.137463	0.281569	-3092
0.169615	0.131568	-3120
0.16818	0.147616	-3122
0.0715936	0.17904	-3124
0.262651	0.187856	-3124
0.0887356	0.122454	-3088
0.303689	0.224387	-3112
0.276827	0.0736819	-3090
0.367421	-0.0319821	-3102
0.256409	0.061831	-3116
0.226979	0.0311946	-3120
-0.0681867	-0.0633449	-3094
-0.161062	-0.07109	-3118
0.168582	0.193362	-2604
0.171479	0.101775	-2610
0.200168	0.0962891	-2628
0.0871471	0.157558	-2630
0.0834823	0.229471	-2636
0.193125	0.197922	-2640
0.141212	0.100499	-2646
0.129727	0.106537	-2640
0.114726	0.103081	-2642
0.22459	0.0261826	-2616
0.32602	0.110142	-2622
0.268544	-0.00313475	-2634
0.297315	0.0460957	-2638
0.0648498	0.0529026	-2614
0.0386946	0.0140989	-2630
0.180591	0.0183607	-2630
0.00853257	0.0619412	-2624
-0.00334459	-0.0438119	-2640
-0.143757	-0.0808915	-2610
0.0881935	0.17105	-2126
0.149336	0.174986	-2130
0.154823	0.271109	-2124
0.160079	0.174909	-2138
0.114627	0.194893	-2148
0.0742328	0.182308	-2160
0.0358217	0.169415	-2156
0.193824	0.130647	-2156
0.170558	0.247849	-2150
0.232637	0.00759081	-2130
0.260729	0.0762287	-2128
0.293973	0.0692085	-2128
0.243226	0.053546	-2132
0.177638	-0.00162843	-2134
0.15181	-0.00612907	-2136
0.238648	0.0754978	-2142
0.258427	0.0521868	-2152
0.28572	-0.00198105	-2160
0.283891	0.0920066	-2160
0.269627	0.0466091	-2160
0.237364	0.0880124	-2160
0.182943	0.0398261	-2160
0.057793	0.0710485	-2154
0.296182	0.0345497	-2130
0.402435	-0.080864	-2142
0.349303	0.0493018	-2156
0.247419	0.119831	-2156
-0.0485097	0.0287925	-2128
-0.0723817	-0.0800433	-2148
0.035706	0.0115209	-2152
-0.142086	-0.158856	-2140
-0.101278	-0.171377	-2142
-0.0899124	-0.128896	-2162
-0.105934	0.139597	-2156
-0.193091	0.199971	-2128
-0.208424	0.206933	-2152
0.276286	0.219493	-1660
0.172025	0.199205	-1648
0.183026	0.19937	-1648
0.22297	0.153104	-1648
0.265972	0.170165	-1652
0.185005	0.230051	-1654
0.242843	0.113838	-1654
0.184287	0.181355	-1658
0.212511	0.167048	-1662
0.251607	0.117602	-1664
0.201159	0.0626559	-1664
0.256878	0.129676	-1666
0.190912	0.141331	-1668
0.239588	0.0948597	-1670
0.227377	0.0769783	-1676
0.111387	0.066925	-1680
0.172997	0.106641	-1674
0.185259	0.193657	-1674
0.195614	0.179003	-1666
0.223471	0.13497	-1666
0.105687	0.0587576	-1648
0.162398	0.039519	-1648
0.0507586	0.162897	-1652
0.00719291	0.0715729	-1652
0.0291643	0.150642	-1672
0.0693764	-0.00120735	-1662
0.179037	-0.0581263	-1650
0.30899	-0.00239891	-1650
0.300929	0.0496196	-1654
0.133591	-0.0365756	-1656
0.208584	-0.0783987	-1654
0.331411	0.00246993	-1676
0.185558	-0.020375	-1678
0.0999721	-0.157168	-1662
-0.119546	-0.119685	-1646
-0.201396	-0.072654	-1646
-0.116632	-0.147983	-1650
-0.10794	-0.109837	-1652
-0.174288	-0.101078	-1660
-0.0960294	-0.0566743	-1656
-0.0848164	-0.125241	-1662
-0.141517	-0.193255	-1664
-0.115495	-0.189009	-1668
-0.106705	-0.0759682	-1678
-0.187506	0.171104	-1658
-0.16294	-0.0642258	-1172
-0.107459	-0.121409	-1188
-0.0651014	-0.158087	-1204
-0.093704	-0.124915	-1204
-0.0940966	-0.106286	-1206
0.10733	0.039428	-1172
0.0921238	0.0753272	-1174
0.0982707	0.0851125	-1172
0.119107	0.0557859	-1184
0.0953439	0.0553375	-1202
0.322799	0.0872004	-1172
0.284372	0.103713	-1174
0.229368	0.0965005	-1176
0.217144	0.184877	-1178
0.33546	0.239715	-1180
0.26447	0.0775621	-1180
0.214734	0.209263	-1184
0.208915	0.0850243	-1184
0.144231	0.0539406	-1180
0.131306	0.15	-1176
0.140936	0.0875974	-1190
0.134357	0.18845	-1194
0.166016	0.229731	-1192
0.238084	0.0646302	-1192
0.246402	0.260263	-1196
0.309516	0.0913542	-1204
0.194638	0.0799147	-1204
0.153727	0.0682914	-1206
0.25408	0.113189	-1208
0.234228	0.264483	-1182
0.106808	0.122703	-1186
0.119772	0.115307	-1172
0.108249	0.110572	-1172
0.26051	-0.00724158	-1170
0.19361	-0.0491472	-1176
0.17979	0.0172695	-1180
0.215961	0.0305176	-1188
0.226014	0.0457506	-1192
0.244191	-0.00903544	-1196
0.273892	0.0568005	-1198
0.175447	0.0175268	-1200
0.151928	-0.0585061	-1176
0.136623	-0.0017718	-1180
0.147585	0.0190119	-1196
0.128006	0.0378988	-1206
0.103474	0.176854	-692
0.14752	0.228398	-696
0.227519	0.211438	-700
0.274242	0.166851	-706
0.104774	0.200696	-702
0.149979	0.180107	-702
0.114977	0.115049	-708
0.202099	0.11757	-710
0.107654	0.189252	-710
0.185931	0.118147	-716
0.188366	0.222491	-720
0.26689	0.129281	-722
0.0853765	0.144525	-714
0.0722301	0.188949	-690
0.0735782	0.0796812	-704
0.0479594	0.186021	-724
0.111766	0.0412305	-690
0.123928	0.0486826	-690
0.133641	0.0202493	-700
0.129912	0.0418811	-704
0.121295	-0.00850189	-704
0.186149	-0.0252543	-706
0.178846	0.0182754	-706
0.141963	0.0626774	-712
0.00334116	-0.0380959	-714
0.132342	0.0275313	-714
0.176155	0.0457032	-718
0.113507	0.00232139	-722
-0.00209004	-0.0799769	-724
0.210396	-0.145316	-690
0.21525	-0.144961	-704
-0.134917	-0.139328	-698
-0.0752803	-0.166519	-702
-0.100657	-0.190435	-706
-0.0742619	-0.192882	-714
-0.0972281	-0.183648	-714
-0.108871	-0.141072	-716
0.0806581	0.173402	-722
0.292198	0.0684661	-710
-0.23776	0.224073	-706
-0.127022	0.190265	-694
-0.23052	0.210241	-726
-0.0801247	0.0467604	-718
-0.106913	-0.167007	-208
-0.0851904	-0.0673296	-208
0.00154717	-0.0521915	-208
-0.0979858	-0.20466	-218
-0.0820576	-0.157581	-228
-0.0346239	-0.127268	-228
-0.0420715	-0.115341	-234
-0.157585	-0.15457	-242
-0.168656	-0.051681	-228
0.27296	0.141155	-208
0.295875	0.163944	-208
0.268544	0.191778	-210
0.209862	0.139683	-212
0.288422	0.24266	-220
0.244664	0.266625	-222
0.211732	0.211334	-216
0.229865	0.214108	-220
0.210189	0.204667	-226
0.243665	0.167954	-228
0.267194	0.18324	-232
0.274608	0.157477	-234
0.323724	0.198977	-234
0.200906	0.210091	-238
0.173864	0.165446	-240
0.344466	0.208478	-240
0.244477	0.231777	-238
0.274599	0.289991	-224
0.0689355	0.197527	-218
0.152473	0.108534	-216
0.191734	0.10078	-212
0.0778294	0.120409	-230
0.0528152	0.0964589	-230
0.13174	0.308296	-236
0.122813	0.116502	-240
0.0478133	0.169441	-226
0.0946032	0.102607	-228
0.122255	0.0423733	-212
0.0935797	0.0746249	-220
0.194742	0.0799225	-218
0.212563	0.0716431	-224
0.205754	0.0394063	-224
0.131846	0.0791752	-222
0.116984	0.0190743	-222
0.217632	0.0491506	-236
0.177415	-0.0641851	-240
0.0343404	0.00878244	-236
0.146477	0.0766448	-236
0.176296	0.0630605	-240
0.127459	0.0872251	-230
0.183325	0.0938249	-228
0.18344	-0.150241	-220
0.183868	-0.209817	-222
0.175538	0.134293	270
0.240996	0.225266	266
0.151951	0.205814	264
0.150404	0.130744	262
0.174809	0.191869	254
0.26715	0.145456	252
0.268847	0.130438	250
0.304968	0.228365	248
0.166301	0.151206	252
0.205832	0.179134	246
0.192724	0.252214	242
0.0620575	0.134654	270
0.0959377	0.149853	262
0.036509	0.0194207	262
0.258352	0.0257197	272
0.239221	-0.0279649	270
0.287068	0.0707417	270
0.147889	0.0656838	268
0.162823	0.0785873	260
0.141156	0.0929751	256
0.215985	0.0483086	252
0.232043	0.0582123	244
0.208756	0.0820486	242
0.145989	0.0345382	244
0.123634	0.0679414	268
0.110319	0.0985506	260
0.133782	0.0552749	242
-0.100285	-0.114136	272
-0.149783	-0.172479	264
-0.110086	-0.170103	262
-0.1759	-0.118458	260
-0.203369	-0.213934	250
-0.118169	-0.158154	252
-0.0823535	-0.149709	252
0.329289	0.117172	742
0.0371164	0.143381	740
0.345077	-0.0575622	742
0.274679	-0.177154	728
-0.0853779	-0.139788	722
-0.13784	0.0234243	744
-0.119435	-0.122901	748
-0.21853	-0.0755204	756
0.353893	-0.0782178	1232
0.076573	0.176676	1680
0.0943384	0.139474	1690
0.100012	0.130609	1692
0.241427	0.182855	1698
0.220317	0.189349	1704
0.192801	0.158722	1712
0.176807	0.105047	1714
0.270335	-0.0132786	1710
0.176159	0.0650687	1708
0.2532	-0.00758562	1704
0.218222	0.0261307	1690
0.253981	-0.0369107	1686
0.201627	0.0180289	1684
0.222574	-0.133968	1700
0.254911	-0.0967802	1684
-0.164709	0.0219414	1714
-0.122677	0.0976031	1682
-0.220575	-0.224015	1708
-0.10972	-0.167564	1698
-0.121368	-0.138553	1694
-0.114739	-0.117278	1688
-0.210056	-0.184486	1684
0.287252	-0.00311217	-5020
0.280801	-0.128073	-4560
-0.177356	-0.0204593	-4542
-0.184939	-0.0557834	-4074
0.164659	0.122121	-3574
0.161603	0.131111	-3592
0.252906	0.0988227	-3596
-0.0634257	0.0371349	-3582
-0.271252	0.22101	-3578
0.231071	0.0096642	-3086
0.21079	-0.0123861	-3090
0.294701	0.017761	-3090
0.236039	-0.0287556	-3098
0.289907	0.0484433	-3100
0.213953	-0.0627179	-3114
0.205388	-0.0273794	-3116
0.32976	-0.10532	-3118
0.359463	-0.0539483	-3118
0.230231	-0.0124625	-3122
0.20559	-0.0533978	-3106
-0.0717306	0.00605542	-3114
0.0676089	0.0281133	-3118
-0.157232	-0.159008	-3104
0.149005	0.13569	-2612
0.226284	0.15779	-2614
0.217674	0.0986774	-2620
0.218017	0.151476	-2622
0.0754465	0.186839	-2644
0.330072	0.0482378	-2628
0.352805	-0.0446627	-2632
0.307112	0.081914	-2640
0.343086	-0.0395202	-2642
0.200411	-0.0361466	-2632
0.308679	-0.203154	-2628
0.262898	-0.106656	-2638
0.293982	-0.208618	-2644
-0.17324	-0.153125	-2624
-0.251032	-0.122636	-2618
-0.169614	-0.0730546	-2634
0.125662	0.167658	-2128
0.198804	0.194527	-2138
0.212919	0.186629	-2136
0.159236	0.197188	-2144
0.196601	0.169056	-2148
0.110021	0.148162	-2156
0.176277	0.149752	-2160
0.124649	0.109849	-2128
0.258432	-0.0120594	-2154
0.135227	0.0657208	-2154
0.153611	0.109041	-2158
0.307818	-0.0713434	-2130
0.306297	0.0631307	-2132
0.361462	-0.0635346	-2142
0.308033	-0.112945	-2142
0.352173	0.0137776	-2144
0.249435	-0.0456346	-2142
0.326869	0.0596046	-2138
0.202308	-0.0479555	-2154
0.345375	0.0232084	-2156
0.331122	0.0189065	-2160
0.243292	-0.160138	-2158
0.194493	0.162234	-1650
0.214836	0.133795	-1650
0.21944	0.103011	-1652
0.105806	0.212225	-1654
0.23022	0.121587	-1654
0.188307	0.128295	-1666
0.202476	0.109356	-1680
0.195397	0.0881127	-1680
0.250935	0.149025	-1680
0.29154	0.185087	-1680
0.167096	0.147257	-1676
0.177456	0.12816	-1676
0.118399	0.1984	-1672
0.175141	0.124041	-1656
0.226287	0.10133	-1668
0.211948	0.133558	-1674
0.0136314	-0.0318014	-1658
0.182427	-0.0930447	-1648
0.212351	0.0033064	-1650
0.331711	-0.0582999	-1652
0.247856	-0.0975743	-1658
0.219492	-0.0807187	-1658
0.195567	-0.00980872	-1664
0.161448	0.0283056	-1664
0.225853	-0.128673	-1678
0.292816	-0.288746	-1650
0.277671	-0.28843	-1654
0.32396	-0.301545	-1666
0.270757	-0.329046	-1676
0.234338	-0.212983	-1676
-0.281355	0.255887	-1664
-0.22179	-0.0825761	-1174
-0.0429189	-0.0721217	-1182
-0.129875	-0.187664	-1186
-0.175666	-0.163064	-1188
-0.193197	-0.14717	-1206
0.173579	0.121482	-1170
0.248469	0.219365	-1178
0.176719	0.205286	-1182
0.214639	0.190509	-1182
0.205809	0.154808	-1188
0.187537	0.164446	-1192
0.242064	0.177327	-1194
0.12976	0.124643	-1196
0.212582	0.0704235	-1202
0.196184	0.136031	-1206
0.184511	0.0977871	-1204
0.226849	0.174989	-1206
0.17823	0.191781	-1204
0.245389	0.151772	-1206
0.111673	0.213652	-1208
0.23873	-0.123982	-1174
0.306803	0.039303	-1182
0.326063	0.0387296	-1182
0.285107	-0.0102558	-1184
0.259099	0.0067196	-1184
0.342864	0.0388766	-1196
0.248251	-0.114608	-1198
0.244683	-0.107991	-1208
0.28873	0.0185929	-1184
0.325671	0.0302676	-1190
0.272277	-0.104551	-1196
0.25721	-0.15336	-1192
0.22898	-0.21699	-1196
0.231624	-0.260638	-1176
0.241508	-0.292758	-1202
0.165952	0.140902	-688
0.144363	0.166652	-692
0.203243	0.12514	-690
0.20158	0.201961	-690
0.202967	0.161011	-692
0.187017	0.1799	-690
0.142322	0.192409	-690
0.125635	0.0919979	-700
0.133011	0.175405	-704
0.188787	0.110539	-712
0.110195	0.102814	-718
0.0977713	0.165195	-726
0.1176	0.15574	-728
0.244035	0.166911	-698
0.0794943	0.119766	-700
0.0846734	0.153803	-710
0.0669056	0.0821874	-708
0.0922091	0.00677934	-690
0.195649	0.0888041	-694
0.230705	0.0451931	-700
0.0484783	-0.016819	-718
0.220972	-0.0980305	-726
0.224546	-0.0479507	-712
0.258152	-0.153899	-690
0.219677	-0.119145	-696
0.258166	-0.0714011	-714
0.147384	-0.110584	-714
0.281836	-0.0395153	-698
0.298871	-0.30161	-696
0.275042	-0.299496	-698
0.263326	-0.27898	-702
0.257681	-0.267026	-714
0.191392	-0.247568	-692
-0.137986	-0.125052	-702
-0.187638	-0.038192	-706
-0.0995801	-0.138374	-710
-0.15785	-0.149516	-210
-0.126176	-0.15181	-226
-0.138938	-0.19294	-230
-0.0429508	-0.0355811	-230
0.175363	0.232835	-208
0.249522	0.165653	-214
0.236304	0.176537	-216
0.199421	0.171417	-216
0.176944	0.113106	-220
0.195284	0.14979	-220
0.277813	0.194353	-224
0.158883	0.128925	-224
0.244755	0.218377	-220
0.256792	0.19826	-220
0.25966	0.207346	-234
0.265517	0.226938	-234
0.235151	0.187776	-236
0.22495	0.207982	-238
0.21447	0.138736	-240
0.210242	0.158299	-242
0.171645	0.183928	-242
0.162049	0.174983	-242
0.238788	0.189366	-242
0.264758	0.241255	-238
0.184637	0.169271	-232
0.211222	0.221189	-230
0.234997	0.136457	-242
0.143978	0.166282	-222
0.0969912	0.10732	-220
0.105347	0.111819	-222
0.0712755	0.140748	-224
0.119031	0.202551	-240
0.114164	0.17374	-242
0.145612	0.111767	-218
0.143253	0.137419	-228
0.103632	0.0892968	-216
0.197572	-0.03749	-228
0.190672	0.0360028	-240
0.0880781	-0.0113055	-240
0.153982	0.0846947	-236
0.171241	-0.0532644	-232
0.280682	-0.0224851	-210
0.263043	-0.0946536	-210
0.280432	0.0594646	-218
0.286029	0.0880908	-232
0.257993	0.0690165	-230
0.362715	0.0907544	-240
0.19528	-0.167858	-212
0.286106	-0.261505	-212
0.20635	-0.204245	-220
0.176637	-0.240862	-226
0.22692	-0.151484	-224
0.2891	-0.249578	-228
0.304451	-0.168886	-232
0.267074	-0.210165	-234
0.143425	-0.220738	-240
0.215436	-0.13992	-232
0.172387	0.221667	274
0.22544	0.183181	274
0.207674	0.162632	272
0.193423	0.147508	270
0.209537	0.171955	266
0.223535	0.214002	258
0.173779	0.169847	256
0.191953	0.210815	256
0.217972	0.187347	250
0.167372	0.131573	252
0.171471	0.172523	248
0.187409	0.184884	242
0.2503	0.186312	244
0.239717	0.133837	244
0.182975	0.138034	240
0.124529	0.146691	262
0.0947785	0.238762	274
0.0875026	0.241799	266
0.0753312	0.247356	256
0.309211	0.00993489	268
0.272449	-0.0238175	260
0.331334	0.0921581	250
0.307436	0.115508	248
0.237042	0.0927818	272
0.3827	-0.0328544	256
0.223313	-0.0826535	262
0.327836	-0.0559921	270
0.338972	-0.167471	266
0.27575	-0.188638	250
0.1503	-0.202209	244
-0.164278	-0.149547	262
-0.167962	-0.126771	242
-0.236157	-0.15738	244
0.132966	0.0795289	730
0.283291	-0.0700032	736
-0.176514	-0.106466	736
0.208399	0.181277	1686
0.0602005	0.103042	1692
0.17548	0.220746	1712
0.175642	0.0506531	1694
0.229551	0.0470024	1684
0.315898	-0.133152	1704
0.316889	-0.152835	1698
0.275504	-0.180948	1694
0.268714	-0.0857085	1690
0.252341	-0.125843	1684
0.300246	-0.176803	1680
-0.258147	-0.0562637	1682
-0.0863052	-0.0983437	1684

## Sheet: Sheet2
0.30965	-0.242655	-1192
0.341031	-0.199676	-690
0.344086	-0.176366	-698
0.326073	-0.0140652	-208
0.288398	-0.199118	-236
0.274027	-0.160037	-238
0.330907	-0.164588	-240
