# Supplementary material for: Spinal premotor interneurons controlling antagonistic muscles are spatially intermingled
Source: eLife. 2022 Dec 13;11:e81976. doi: 10.7554/eLife.81976 (PMC9844990; doi:10.7554/eLife.81976)
Supplement: Figure 12—figure supplement 6—source data 3. [file elife-81976-fig12-figsupp6-data3.xlsx]

## Sheet: Sheet1
-0.0423778	-0.11693	-4530
-0.0928174	-0.101194	-4558
0.174541	0.110171	-4054
0.263771	0.194144	-3570
0.0607774	-0.150721	-3588
-0.164582	-0.101957	-3600
-0.0245125	0.00604288	-3586
-0.096654	0.228975	-3588
0.0831661	0.135391	-3104
0.0466161	-0.00880572	-3104
-0.108199	0.00298388	-3108
0.239841	0.142308	-2648
0.0485185	0.0315533	-2644
0.0484249	0.051043	-2664
-0.135677	0.206738	-2668
-0.0414295	0.094373	-2668
0.354754	0.199643	-2160
0.0703121	0.0278713	-2162
0.367009	-0.023195	-2130
0.206263	-0.0549283	-2130
-0.149123	-0.117549	-2130
0.0780824	0.11573	-1652
0.0862065	0.228358	-1654
0.067301	0.0427604	-1682
0.199471	-0.0971231	-1674
-0.0554048	0.0388083	-1680
-0.0985362	-0.191047	-1660
-0.149369	-0.219824	-1660
-0.0460309	-0.124902	-1678
0.169624	0.0623928	-1170
0.278603	0.210482	-1176
0.230605	0.176281	-1186
0.266353	0.203968	-1194
0.319505	0.173411	-1196
0.238111	0.0848454	-1200
0.0803571	0.119413	-1190
0.138239	0.184316	-1190
0.177	0.2134	-1202
0.133861	0.00703242	-1170
0.127546	0.0610237	-1186
0.153589	0.0371052	-1190
0.156506	0.0710157	-1208
0.161302	-0.0187393	-1208
0.0927617	0.00111329	-1172
0.0135664	-0.0487429	-1172
0.000896714	-0.0799911	-1192
0.0146319	-0.0279845	-1190
0.0154177	-0.0464679	-1194
0.0262747	0.0288004	-1190
-0.0891507	0.0213254	-1176
-0.0647852	-0.0823284	-1184
-0.0591349	-0.0736433	-1200
-0.287469	0.214603	-1200
-0.223311	0.00416966	-1182
-0.138051	-0.152888	-1196
-0.167628	-0.190947	-1202
0.150595	-0.281919	-1200
0.228415	0.156113	-686
0.154422	0.14217	-686
0.285732	0.0458206	-696
0.257642	0.0709042	-704
0.254556	0.134787	-710
0.123973	0.0398191	-708
0.320984	0.00425343	-690
0.193549	-0.102916	-690
0.0540877	0.00529057	-696
-0.00146941	-0.0386946	-706
0.0235296	0.00128186	-716
-0.117001	-0.165371	-698
-0.107904	-0.135533	-708
-0.107671	0.11412	-712
0.238892	-0.0203061	-216
0.229737	-0.0431698	-220
0.0472214	-0.00573444	-222
0.220292	0.160564	-230
0.216795	0.00775361	-234
0.280038	0.150906	-236
0.267377	0.0192023	-240
0.161052	-0.0171293	-238
0.124485	-0.0236983	-240
0.0421623	0.0166379	-244
-0.117037	0.0247012	-208
-0.0927712	0.0796226	-218
-0.130138	-0.155664	-208
-0.0818479	-0.177014	-216
0.305603	0.10909	272
0.202302	0.207969	270
0.21464	0.224059	268
0.053411	0.019777	264
0.072767	0.0465623	258
0.07985	0.175324	248
0.194064	0.107191	244
0.22114	-0.00314098	260
0.192928	-0.0144076	254
0.257412	-0.0085477	250
0.27736	-0.248467	266
0.243066	-0.181401	262
0.205525	-0.183816	254
-0.13483	-0.130903	264
-0.0831175	0.157509	252
-0.118707	0.10963	266
0.0826772	0.0599537	716
0.179413	0.130314	734
0.241133	0.161483	740
0.237993	-0.0993448	738
-0.00873171	-0.0570774	730
-0.149308	-0.156151	732
-0.088574	-0.0598967	716
-0.210143	-0.195785	734
0.290752	0.202127	1238
-0.20205	0.100847	1208
-0.16591	-0.0441399	1204
-0.253611	0.0636864	1218
-0.291198	0.0144067	1232
-0.133375	-0.112653	1688
-0.292297	-0.231859	1690
-0.204302	-0.0489118	1680
-0.248959	-0.190881	1700
0.248945	0.0364997	2176
-0.000513025	-0.0349187	-5032
0.157412	0.143018	-3598
0.175459	-0.164624	-3598
0.0508553	-0.0101131	-3598
-0.0826365	-0.0525926	-3576
-0.080951	-0.0583782	-3564
0.298013	0.0284088	-3110
0.282978	0.0444809	-3108
0.282639	0.0431896	-3108
-0.0795125	0.0350551	-3088
0.149936	-0.0346449	-2666
-0.0606747	0.0493219	-2648
-0.111047	0.086652	-2670
-0.204701	-0.0446208	-2638
-0.183416	0.255876	-2638
0.325222	0.153788	-2138
0.217653	0.112074	-2136
0.198851	0.155301	-2152
0.0339208	0.0969988	-2162
0.323224	-0.112889	-2130
0.261621	0.0295929	-2152
-0.175774	0.123986	-2162
0.183926	0.158866	-1648
0.191769	0.14233	-1652
0.184084	0.0702527	-1658
0.136629	0.218989	-1678
0.296577	0.00200465	-1654
0.279529	-0.0280078	-1652
0.326788	-0.0821333	-1648
0.316524	-0.105183	-1650
0.169716	-0.0860362	-1648
0.255416	0.0126252	-1670
0.296363	-0.300542	-1670
0.243193	-0.289717	-1672
0.200439	-0.251456	-1674
0.189483	-0.181457	-1676
-0.0451751	0.0751129	-1662
-0.226331	-0.193952	-1652
0.274231	0.134688	-1168
0.245849	0.196237	-1168
0.253625	0.101891	-1170
0.26872	0.109117	-1176
0.24864	0.149112	-1178
0.243429	0.104643	-1180
0.196318	0.0987857	-1186
0.216209	0.144493	-1208
0.24905	0.126411	-1212
0.109288	0.254591	-1176
0.107726	0.152148	-1212
0.168529	-0.00127234	-1168
0.154534	0.0224871	-1172
0.230725	-0.00972921	-1176
-0.107394	-0.165971	-1190
-0.0779707	-0.214506	-1188
0.25163	0.0211733	-1182
0.317736	-0.0727444	-1182
0.3587	-0.200794	-1186
0.222139	-0.276754	-1180
0.283569	-0.33255	-1180
0.264261	-0.310795	-1194
0.288544	-0.223274	-1194
0.230586	-0.271063	-1202
0.142982	-0.14795	-1190
0.184604	0.101931	-694
0.143085	0.135131	-694
0.22569	0.0991109	-698
0.219537	0.0771095	-708
0.129423	0.132404	-708
0.175697	0.0193153	-714
0.103534	0.0438453	-718
0.230983	0.0789507	-712
0.226727	-0.0922762	-718
0.157708	-0.028498	-708
0.243147	-0.234277	-684
0.23201	-0.221336	-696
0.240665	-0.151271	-694
0.320104	-0.200075	-702
0.239063	-0.243343	-702
0.265312	-0.240465	-702
0.219523	-0.223352	-706
-0.057407	-0.0509305	-698
0.234814	0.1025	-214
0.202493	0.0842801	-222
0.121525	0.15901	-222
0.234119	0.14427	-240
0.103642	0.166548	-242
0.275661	-0.165094	-208
0.339679	-0.254624	-212
0.20456	-0.247732	-214
0.256766	-0.284319	-210
0.243291	-0.144956	-226
0.260202	-0.307277	-230
0.279563	-0.299873	-228
-0.0843906	-0.132511	-222
-0.127477	-0.125693	-210
-0.178121	-0.163627	-216
-0.266924	-0.172706	-232
-0.13507	-0.16084	-244
0.21858	0.0944592	274
0.0904943	0.129507	266
0.316695	0.0218938	268
0.303635	-0.0585676	258
0.264315	-0.0412301	244
0.325885	-0.261136	248
0.291357	-0.245438	264
0.317567	-0.143598	268
0.217589	-0.21427	266
0.210381	-0.192227	242
0.0118448	-0.056904	260
-0.172406	-0.153319	250
0.140898	0.170611	716
0.177851	0.189183	732
0.200298	-0.0158949	728
0.238436	-0.236275	732
0.238608	-0.208611	738
0.332309	-0.106104	744
0.21531	0.10203	1214
0.335531	-0.154378	1208
0.249885	-0.132111	2168

## Sheet: Sheet2
0.29069	-0.196804	-1178
0.266772	-0.248147	-1210
0.314293	-0.188637	-684
0.356169	-0.17322	272
0.310613	-0.174132	266
0.342178	-0.103106	262
0.336564	-0.093317	244
0.306444	-0.148005	242
0.363068	-0.172605	244
0.333391	-0.134162	274
