# Supplementary material for: Spinal premotor interneurons controlling antagonistic muscles are spatially intermingled
Source: eLife. 2022 Dec 13;11:e81976. doi: 10.7554/eLife.81976 (PMC9844990; doi:10.7554/eLife.81976)
Supplement: Figure 12—figure supplement 6—source data 4. [file elife-81976-fig12-figsupp6-data4.xlsx]

## Sheet: Sheet1
0.200224	0.16531	-4008
0.245703	0.193046	-4004
0.205695	0.225147	-4016
0.260944	0.161485	-4028
0.215472	0.213139	-4030
0.213858	0.0875719	-4032
0.231488	0.214183	-4034
0.246147	0.159702	-4014
0.17414	-0.0159981	-4016
0.267647	-0.121533	-4030
-0.0205999	-0.0621924	-4040
0.298266	-0.274488	-4032
-0.0699636	-0.0152677	-4010
-0.0696451	-0.11742	-4018
-0.159211	-0.0719043	-4024
-0.146713	-0.0738606	-4030
-0.0701852	-0.144409	-4036
-0.0933194	-0.109456	-4038
-0.117105	-0.252517	-4038
-0.0023335	-0.0715304	-4014
-0.0509839	-0.0882849	-4026
0.21469	0.284677	-3534
0.233069	0.277607	-3534
0.268802	0.173295	-3534
0.0240377	0.176198	-3538
0.139558	0.141189	-3544
0.192543	0.0844838	-3544
0.261924	0.0866732	-3546
0.128781	0.0828108	-3552
0.19577	0.240781	-3550
0.330263	0.144135	-3556
0.214925	0.112269	-3562
0.147955	0.149249	-3562
0.188051	0.299748	-3556
0.0528152	0.118961	-3566
0.260979	-0.237573	-3540
0.238721	-0.229848	-3536
0.26184	-0.201859	-3546
-0.00466802	-0.0618481	-3530
0.0374681	0.00434239	-3538
-0.107814	0.0964417	-3556
-0.0456175	0.0206354	-3558
-0.0227664	0.00251669	-3558
0.00545037	-0.0642557	-3558
-0.250143	0.2331	-3538
-0.123527	-0.156813	-3542
-0.1176	-0.103803	-3548
-0.168016	-0.161607	-3562
-0.0127165	0.14451	-3052
0.0992643	0.321441	-3052
0.106369	0.360224	-3056
0.103907	0.164669	-3056
0.164469	0.2409	-3060
0.0707637	0.166873	-3060
0.232383	0.336693	-3064
0.180135	0.283715	-3064
0.122999	0.322922	-3060
0.21081	0.183779	-3072
0.0352526	0.259127	-3074
-0.0372976	0.0283833	-3050
-0.0501669	-0.0541876	-3044
-0.0185342	0.0615702	-3060
0.124827	0.113825	-3072
0.127647	-0.036468	-3062
0.117863	-0.0374274	-3080
-0.303258	0.0469858	-3052
-0.319189	0.0799294	-3070
-0.36422	0.072081	-3076
-0.0808241	0.00180046	-3044
-0.0883518	0.00326725	-3044
-0.118709	-0.0054709	-3058
-0.0656571	-0.0709201	-3046
-0.113814	-0.150113	-3046
-0.28158	-0.251307	-3046
-0.158704	-0.18909	-3052
-0.186159	-0.203167	-3048
-0.233493	-0.253212	-3054
-0.187945	-0.152247	-3054
-0.170645	-0.142973	-3056
-0.0886985	-0.119505	-3056
-0.231959	-0.124176	-3056
-0.144883	-0.258523	-3062
-0.130597	-0.113033	-3066
-0.166326	-0.155215	-3068
-0.100586	-0.0987334	-3068
-0.16025	-0.231474	-3074
-0.135428	-0.150488	-3076
-0.102167	-0.145858	-3076
-0.179894	-0.207498	-3070
0.224169	0.229223	-2570
0.317317	0.314555	-2568
0.287868	0.225348	-2576
0.317933	0.270854	-2584
0.325215	0.262452	-2578
0.133029	0.215036	-2580
0.16235	0.285086	-2596
0.177257	0.299627	-2598
0.220713	0.074499	-2570
0.183762	0.0454035	-2574
0.210532	0.0887371	-2582
0.119985	0.110617	-2588
0.164867	0.0677668	-2594
0.149262	0.0982486	-2590
0.125025	0.187637	-2590
0.136167	0.193886	-2588
0.0305068	0.0176688	-2564
0.0479304	0.0255875	-2578
-0.00707014	-0.0537027	-2596
0.121356	0.0148121	-2600
0.329998	-0.0968106	-2578
0.313368	-0.0136062	-2584
0.277783	-0.0844876	-2586
-0.256427	0.189668	-2582
-0.135155	-0.093754	-2566
-0.0890368	-0.0725838	-2570
-0.208262	-0.114795	-2572
-0.137146	-0.154466	-2568
-0.114756	-0.112164	-2566
-0.144289	-0.106206	-2566
-0.15292	-0.15751	-2586
-0.168369	-0.138867	-2588
-0.0985289	-0.112642	-2584
-0.0617239	-0.0999381	-2594
-0.264353	-0.170768	-2600
-0.113301	-0.067425	-2600
-0.100442	-0.0767817	-2602
-0.221479	-0.195046	-2596
-0.157227	-0.120057	-2594
0.380198	0.228516	-2088
0.242386	0.157041	-2090
0.178833	0.173485	-2092
0.139303	0.139164	-2094
0.287284	0.242395	-2100
0.230199	0.12643	-2102
0.179801	0.230539	-2116
0.229517	0.251145	-2118
0.217165	0.255122	-2120
0.176562	0.131045	-2120
0.150544	0.125216	-2118
0.327068	0.078908	-2110
0.17643	-0.0869175	-2102
0.0548412	0.0238226	-2094
-0.110997	-0.0307486	-2108
-0.0559851	-0.0794429	-2120
-0.234472	0.147866	-2102
-0.14054	0.100749	-2106
-0.224694	0.210529	-2108
-0.189195	0.186555	-2110
-0.26555	0.14574	-2114
-0.190646	0.0129536	-2082
-0.140639	-0.200099	-2084
-0.10784	-0.17245	-2084
-0.108495	-0.0904833	-2090
-0.18887	-0.100564	-2102
-0.214437	-0.180411	-2112
-0.1385	-0.18074	-2114
-0.150445	-0.150616	-2116
0.249413	0.146459	-1608
0.172587	0.284212	-1608
0.183015	0.144425	-1606
0.267559	0.191607	-1622
0.23801	0.272006	-1620
0.267532	0.210289	-1632
0.201316	0.217755	-1636
0.188419	0.122553	-1624
0.182282	0.125284	-1628
0.188937	0.0942426	-1610
0.247056	0.049119	-1612
0.117515	0.0719802	-1608
0.270419	0.0937294	-1628
0.0969393	0.0521798	-1632
0.144068	0.0910718	-1632
0.214102	0.119321	-1626
0.197344	-0.0784927	-1632
0.282219	-0.201981	-1630
0.00440157	-0.0268994	-1612
-0.0410905	0.00860805	-1642
-0.0988343	0.156735	-1608
-0.0648557	0.11788	-1614
-0.224948	-0.0995027	-1610
-0.200957	-0.14955	-1616
-0.105649	-0.156894	-1626
-0.101991	-0.141052	-1622
-0.0717583	-0.147492	-1630
-0.123233	-0.121234	-1632
-0.100393	-0.126494	-1632
-0.165062	-0.200698	-1640
-0.135848	-0.134515	-1638
-0.1369	-0.112448	-1642
-0.330079	-0.169296	-1642
-0.307895	-0.0532551	-1634
-0.0508962	-0.124139	-1132
-0.107857	-0.208519	-1138
-0.0570805	-0.11697	-1140
-0.116966	-0.19059	-1144
-0.108563	-0.16485	-1146
-0.0864671	-0.226276	-1156
-0.105074	-0.162683	-1158
-0.313927	0.139167	-1124
-0.106328	0.0422104	-1158
0.0846552	0.195909	-1132
0.221698	0.1963	-1140
0.0770061	0.183976	-1142
0.0892175	0.188806	-1146
0.0617785	0.196203	-1148
0.0959118	0.0915237	-1148
0.251421	0.276648	-1154
0.190066	0.160745	-1158
0.31441	0.185719	-1160
0.219577	0.076487	-1158
0.189122	-0.0156802	-1164
0.152954	0.0151019	-1152
0.124913	0.0720232	-1148
0.219485	0.0870029	-1136
0.169343	0.0742632	-1134
0.203628	0.0894792	-1132
0.18986	-0.0169998	-1134
0.234073	0.0207712	-1132
0.141068	0.0345698	-1128
0.0321261	-0.0110047	-1138
0.111758	0.00535979	-1142
0.162638	-0.287172	-1162
-0.210806	-0.112545	-648
-0.112906	-0.0850108	-652
-0.101309	-0.171922	-652
-0.1609	-0.12129	-658
-0.129718	-0.191469	-670
-0.0865615	-0.127531	-682
-0.0603	-0.202109	-682
-0.141595	-0.198528	-676
-0.0994573	-0.126882	-672
-0.273184	-0.00216616	-656
-0.103959	0.154888	-662
0.0917355	0.143232	-652
0.122014	0.0641301	-656
0.130206	0.0697666	-666
0.0690953	0.11096	-670
-0.0383786	0.0169314	-670
0.127248	0.0473019	-672
0.146931	0.0795364	-672
0.00473628	-0.1092	-676
0.00319745	-0.0984866	-676
0.169193	0.0510669	-680
0.052159	0.0834561	-678
0.08828	0.218171	-662
0.211594	0.110349	-664
0.221868	0.0299431	-666
0.257565	0.0757493	-664
0.229797	0.0569022	-678
0.20771	0.00127465	-684
0.203347	-0.301251	-660
0.230226	-0.079669	-662
0.212704	-0.0971678	-668
0.301878	-0.248261	-686
0.161288	0.226764	-166
0.201007	0.129754	-166
0.301813	0.0190313	-170
0.164434	0.00206934	-168
0.211404	0.165348	-168
0.12576	0.191369	-172
0.247346	0.0825078	-182
0.213737	0.044038	-184
0.231139	0.0176185	-188
0.228082	0.159456	-186
0.315697	0.180897	-192
0.175261	0.0580663	-202
0.20454	0.0680972	-198
0.026346	0.123778	-196
0.128926	-0.0601772	-200
-0.108679	-0.123205	-166
-0.104458	-0.0848099	-170
-0.00385905	-0.0981318	-170
-0.105451	-0.0291786	-178
-0.181122	-0.036226	-178
-0.172167	-0.0673659	-180
-0.163342	-0.0315305	-188
-0.110888	0.0540107	-188
-0.1392	-0.107057	-196
-0.0670626	-0.0868293	-200
-0.12694	-0.107855	-166
0.127832	0.0852377	314
0.267441	0.0281054	312
0.149059	0.0542254	306
0.259216	-0.00782428	306
0.128572	0.0776313	298
0.199761	0.000485876	294
0.126985	0.0386858	290
0.0310892	0.0670928	286
0.0399154	0.135526	286
0.229408	0.187062	280
0.269757	0.016369	280
0.182598	-0.126512	300
0.231546	-0.0514777	288
0.245573	-0.0920568	284
0.289186	-0.149466	276
-0.132949	0.139095	314
-0.0927163	-0.070251	308
-0.230126	0.159468	282
-0.15455	-0.249774	306
-0.0972547	-0.192105	306
-0.147411	-0.208516	302
-0.0813287	-0.170752	300
-0.114411	-0.240241	294
-0.210714	-0.218577	292
-0.167218	-0.222958	290
-0.114862	-0.246842	282
-0.129174	-0.206313	278
-0.0714111	-0.137746	282
0.162511	0.185307	790
0.160812	0.0579583	792
0.172614	0.258894	786
0.0837986	0.105892	780
0.0710426	0.0934047	772
0.178633	0.215269	760
0.146024	0.267639	758
0.214994	0.197266	756
0.174673	0.0318331	778
0.356236	0.0900951	762
0.378251	-0.0751299	754
-0.222083	-0.159581	794
-0.23477	-0.169558	786
-0.114984	-0.131689	788
-0.0624464	-0.074954	778
-0.104439	-0.101311	774
-0.176186	-0.133376	766
-0.094606	0.101991	766
-0.0880182	-0.137519	1256
0.0963349	-0.00881991	1242
0.356542	0.11849	1258
0.17565	0.0990836	-4006
0.167195	0.0784339	-4006
0.273276	0.0548803	-4012
0.150514	0.135018	-4012
0.248231	0.0559671	-4038
0.249166	-0.0291878	-4010
0.0533313	-0.0080425	-4018
0.105652	-0.0629836	-4030
0.0789514	-0.0185108	-4026
0.0591616	-0.0222408	-4026
0.264358	-0.180187	-4030
0.212757	-0.0498287	-4040
0.224986	-0.259812	-4012
-0.257461	-0.0722955	-4022
-0.0903835	-0.0201715	-4032
-0.121439	-0.0644965	-4032
-0.0815065	-0.0982489	-4030
-0.150328	-0.143652	-4040
-0.153734	-0.0500287	-4042
-0.20836	0.185308	-4040
-0.226385	-0.297833	-4008
-0.121522	-0.205984	-4018
-0.103574	-0.219269	-4020
-0.182872	-0.26116	-4032
-0.123163	-0.237623	-4030
0.0994563	0.126846	-3536
0.0919457	0.126671	-3554
0.297776	0.210093	-3564
0.0844091	-0.149474	-3562
-0.0623403	-0.0173986	-3534
-0.124237	-0.00402962	-3546
-0.0406692	-0.0573457	-3548
-0.0960009	0.0260616	-3554
-0.0832029	-0.0375249	-3558
0.118259	0.024265	-3564
-0.216659	0.190199	-3562
-0.173793	-0.127799	-3532
-0.131839	-0.11056	-3530
-0.100702	-0.081247	-3532
-0.0607104	-0.114	-3534
-0.128534	-0.11547	-3536
-0.177202	-0.0652231	-3538
-0.0645765	-0.0934522	-3536
-0.0899312	-0.17024	-3540
0.203841	0.185906	-3054
0.219249	0.190418	-3058
0.0587523	0.182013	-3066
0.12582	0.208721	-3070
0.102379	0.261025	-3072
0.0131044	0.213275	-3074
0.177344	0.141778	-3078
0.123416	0.134951	-3074
0.0954446	0.125031	-3058
0.261347	0.205176	-3052
0.0246045	0.00342018	-3044
0.178942	0.102807	-3058
0.151635	0.10816	-3064
0.175575	-0.00584629	-3064
0.205715	0.098643	-3076
0.263857	-0.0439758	-3046
0.249506	0.031164	-3046
0.248836	-0.0941315	-3044
0.210164	-0.149452	-3048
0.138519	-0.0636488	-3054
0.22073	-0.0356477	-3062
0.245222	-0.100708	-3064
0.272642	-0.0622793	-3070
0.244118	-0.108994	-3072
0.143055	-0.0255958	-3070
-0.119121	0.126846	-3076
-0.200139	-0.134319	-3046
-0.206162	-0.22161	-3046
-0.20199	-0.164502	-3044
-0.111499	-0.114826	-3048
-0.164804	-0.292558	-3050
-0.0488506	-0.0681534	-3064
-0.284024	-0.177391	-3068
-0.120308	-0.219107	-3070
-0.246327	-0.17411	-3078
-0.200433	-0.150537	-3078
-0.141022	-0.197571	-3068
0.0358206	0.0641814	-2568
0.201952	0.094573	-2572
0.200397	0.132683	-2574
0.203104	0.154718	-2574
0.209878	0.11061	-2580
0.1065	0.0992804	-2588
0.0979752	0.119393	-2584
0.16122	0.113441	-2588
0.134747	0.138313	-2594
0.0920629	0.157252	-2592
-0.0032498	0.0596675	-2592
0.196532	0.152312	-2596
0.290262	0.12383	-2598
0.193288	0.191132	-2600
0.0931144	0.00818308	-2568
0.301186	0.0490598	-2582
0.303865	0.00690629	-2588
0.346733	-0.0828884	-2590
0.29538	-0.0767108	-2586
0.332	-0.0593773	-2598
0.239322	-0.185535	-2570
0.208776	-0.198593	-2570
0.350285	-0.175172	-2574
0.283678	-0.149075	-2574
0.307736	-0.109353	-2576
0.255101	-0.229803	-2582
0.316299	-0.105065	-2588
0.268705	-0.113306	-2592
0.198501	-0.106019	-2596
0.229108	-0.106561	-2598
0.231732	-0.18271	-2602
-0.214644	-0.0918453	-2570
-0.114163	-0.0129485	-2570
-0.140307	-0.0186231	-2570
-0.192516	-0.12706	-2586
-0.141078	-0.0780392	-2588
-0.245257	-0.129201	-2596
0.177101	0.18888	-2092
0.169253	0.215919	-2094
0.329256	0.181145	-2100
0.226586	0.190677	-2112
0.305713	0.0651864	-2116
0.142762	0.123138	-2114
0.21414	0.0639452	-2094
0.276549	0.0646104	-2098
0.312362	0.0432564	-2096
0.306037	0.0178567	-2094
0.240555	-0.114464	-2096
0.230485	0.0496338	-2102
0.187446	-0.00728255	-2106
0.274333	0.06352	-2106
0.321772	0.0669899	-2104
0.266881	-0.123714	-2112
0.328998	-0.0660778	-2114
0.250102	-0.101949	-2116
0.269097	-0.0446211	-2118
0.242793	-0.218415	-2092
0.22806	-0.226116	-2110
0.0140238	0.0254135	-2090
-0.21248	-0.0758771	-2082
-0.148691	-0.164859	-2098
-0.214217	-0.0860054	-2096
-0.195948	-0.0847985	-2118
-0.167163	-0.0598376	-2118
-0.22052	-0.0764325	-2098
0.230738	0.176871	-1608
0.210124	0.145152	-1608
0.179269	0.153387	-1610
0.18783	0.124783	-1608
0.198104	0.178197	-1614
0.195041	0.184325	-1620
0.13776	0.206514	-1624
0.189146	0.180793	-1624
0.190986	0.132841	-1640
0.264557	0.140148	-1642
0.282577	0.0804782	-1604
0.12239	0.119547	-1606
0.318296	0.0682779	-1612
0.203998	-0.0402116	-1618
0.333941	-0.0299479	-1624
0.245827	0.00962831	-1630
0.143759	-0.0214438	-1630
0.161464	0.0680885	-1632
0.0909291	0.107738	-1632
0.186023	0.0634393	-1640
0.258277	0.06873	-1624
0.207695	-0.190825	-1608
0.351459	-0.035819	-1614
0.25463	-0.170408	-1614
0.373429	-0.169448	-1628
0.248912	-0.133098	-1628
0.336459	-0.0855184	-1632
0.288421	-0.110994	-1636
0.286642	-0.0987451	-1626
0.227301	-0.188723	-1632
-0.200913	0.176169	-1636
-0.0923339	-0.115863	-1614
-0.16196	-0.152238	-1634
-0.186965	-0.101067	-1632
-0.134358	-0.0953603	-1124
-0.200476	-0.0906358	-1126
-0.076149	-0.142906	-1126
-0.120655	-0.13072	-1142
-0.0968449	-0.142165	-1150
-0.169131	-0.177215	-1150
-0.153264	-0.188179	-1154
-0.229581	-0.109273	-1156
-0.239698	0.118518	-1126
0.171676	0.193783	-1128
0.145094	0.114339	-1128
0.0773316	0.0967206	-1132
0.113152	0.256773	-1136
0.159399	0.231489	-1138
0.0474948	0.113557	-1152
0.130669	0.203925	-1152
0.203368	0.134378	-1148
0.171437	0.127837	-1148
0.1642	0.176091	-1144
0.186214	0.226113	-1138
0.207046	0.189018	-1136
0.239752	0.125141	-1158
0.230704	-0.0363537	-1158
0.301146	-0.0176433	-1158
0.199527	0.0953929	-1150
0.127729	0.0532476	-1132
0.252929	0.143851	-1146
0.0957436	-0.0409478	-1140
0.0296036	0.0682925	-1150
-0.093067	-0.0556276	-656
-0.0727397	-0.0181913	-658
-0.145286	-0.0944932	-656
-0.204646	-0.194115	-662
-0.116942	-0.0314388	-676
-0.231585	0.149119	-670
0.130202	-0.0736568	-648
0.167608	0.0914577	-658
0.103129	0.0721906	-666
0.158103	0.123118	-664
0.138034	0.0683667	-672
0.158449	0.112456	-680
0.203314	0.107719	-684
0.133597	0.231116	-646
0.154017	0.24135	-682
0.293368	0.0352627	-654
0.213953	0.172924	-662
0.218574	0.131104	-678
0.268466	0.128555	-676
0.284978	0.130478	-680
0.26155	-0.0354469	-656
0.239389	-0.21862	-654
0.242739	-0.145206	-666
0.213874	-0.066731	-676
0.224466	-0.252468	-684
0.216676	-0.251451	-684
0.193863	0.0913088	-168
0.272487	0.0912506	-170
0.101447	0.157495	-174
0.185032	0.0914002	-172
0.265664	0.132338	-180
0.102575	0.227312	-182
0.145661	0.125615	-180
0.272042	0.131532	-188
0.212729	0.093162	-188
0.207183	0.141239	-202
0.321108	-0.0403647	-166
0.263822	-0.134566	-170
0.314093	-0.202563	-188
0.202305	-0.266546	-190
0.29202	-0.147804	-192
0.231781	-0.303271	-194
0.262715	-0.113806	-198
-0.15654	-0.0487584	-172
-0.186202	-0.0686457	-170
-0.107122	-0.0753108	-180
-0.149473	-0.0251812	-184
-0.208109	-0.0358021	-184
-0.129242	-0.0990626	-188
-0.179601	-0.0752111	-192
-0.0991765	-0.0255967	-200
0.115364	0.145956	302
0.0675576	0.0807643	290
0.0587872	0.023699	298
0.309717	0.11615	292
0.294259	-0.111106	308
0.166433	-0.0482693	304
-0.1525	-0.0612288	316
-0.217357	0.0499447	306
-0.268393	-0.00733003	304
-0.147895	-0.0155229	292
-0.194203	-0.22223	296
0.118639	0.0870573	794
0.259163	0.101791	780
0.361363	-0.00202254	774
0.270032	0.0362379	764
-0.363899	0.00960908	764

## Sheet: Sheet2
0.182907	-0.160741	-3530
0.187595	-0.144652	-3542
0.190509	-0.180751	-3542
0.221744	-0.149663	-3562
0.313845	-0.136745	-1630
0.306695	-0.209732	-1126
0.312402	-0.255062	-1130
0.305707	-0.156258	-652
0.32597	-0.261735	-176
0.371348	-0.117978	-176
