# Supplementary material for: Spinal premotor interneurons controlling antagonistic muscles are spatially intermingled
Source: eLife. 2022 Dec 13;11:e81976. doi: 10.7554/eLife.81976 (PMC9844990; doi:10.7554/eLife.81976)
Supplement: Figure 12—figure supplement 7—source data 1. — The x-y coordinates are normalized (between –0.5 and 0.5) and scaled to an idealized spinal cord of dimensions 1700 μm and 900 μm in the mediolateral and dorsoventral directions respectively, while z coordinates are in micron, with the axis origin taken at the border between L4 and L5 and negative values in the rostral direction. [file elife-81976-fig12-figsupp7-data1.xlsx]

## Sheet: Sheet1
0.282522	0.0677972	-4030
0.142538	0.0567725	-3536
0.0501161	0.0139734	-3552
0.212501	0.27813	-3074
0.2	0.104937	-2592
-0.0762405	-0.15815	-2108
-0.065493	-0.012909	-2116
0.0909101	0.194578	-2094
0.192356	0.231793	-2104
-0.036466	-0.00926156	-1626
0.173295	0.0746549	-1628
0.236994	0.199927	-1618
0.247256	0.122073	-1608
0.334228	-0.120627	-1628
0.164344	-0.0485464	-1132
0.300574	-0.12454	-1144
0.177546	-0.0257571	-1150
0.217656	-0.0255044	-1162
0.149743	-0.26802	-1164
0.0679344	0.0256127	-1130
0.190419	0.280938	-1130
0.0938849	0.170609	-1136
0.281536	0.164551	-1156
0.236817	0.137841	-1156
0.15593	0.00840173	-650
0.0757163	0.113111	-656
0.230084	0.248085	-664
0.0961306	0.173339	-670
0.13416	0.0276991	-680
0.159187	-0.0223878	-682
0.267438	0.0602136	-684
0.274201	-0.106269	-646
0.227427	-0.212738	-650
0.256521	-0.324311	-676
-0.225673	-0.123927	-664
-0.124293	-0.1091	-658
-0.140613	-0.176364	-670
0.328161	-0.115978	-194
0.031966	-0.0061889	-188
0.00014508	-0.059604	-190
-0.32196	0.151787	-172
0.235449	0.0460566	-166
0.301342	0.098976	-166
0.125	0.0917492	-170
0.119272	0.154715	-192
0.125677	0.050828	-190
0.08686	0.0641586	-198
0.337236	0.0399297	-174
0.144602	0.223777	-182
0.119041	-0.0100618	-166
-0.096301	-0.167689	-172
0.288607	0.387693	-196
0.227267	-0.0402815	282
0.140328	-0.230087	284
0.206576	-0.0410848	302
0.0587736	0.0213573	300
0.0181395	-0.101441	302
-0.125695	-0.164223	298
-0.082718	-0.118898	298
-0.0990649	-0.17014	292
-0.0990087	-0.158152	288
-0.0966879	-0.181997	282
0.141346	0.256118	308
0.162227	0.0510412	300
0.151972	0.110618	300
0.157973	0.0796669	288
0.204379	0.0797287	288
0.217483	0.189883	286
0.263995	0.204072	282
0.238326	0.23741	286
0.270508	0.0549342	270
-0.167008	-0.0927187	778
-0.228958	-0.121998	760
0.157315	0.183538	762
0.215722	0.253619	774
0.350158	-0.0515111	790
-0.154438	-0.143487	1264
0.215351	0.108526	1258
0.318144	0.0914308	1258
0.177286	0.0233888	-3550
0.269316	-0.108276	-3056
0.200814	-0.222192	-3062
-0.214182	-0.0998767	-3074
0.202424	0.00345828	-2576
0.207051	-0.160645	-2590
-0.114735	-0.0782206	-2108
0.256241	0.158354	-2098
0.229334	0.095981	-2098
0.0391874	0.0908062	-2116
0.173933	0.115816	-2126
0.197481	0.146239	-2090
0.236311	0.0149129	-2102
0.321018	-0.13281	-2104
0.317205	-0.11777	-2116
0.16006	-0.035753	-2092
0.0515562	0.0307282	-1616
-0.136604	-0.0231393	-1620
-0.145655	-0.0683076	-1620
0.132901	0.281214	-1610
0.34636	-0.0355124	-1614
0.359623	-0.134059	-1618
0.340364	-0.0514352	-1628
0.326185	-0.0820393	-1628
0.244738	-0.236024	-1632
0.263247	-0.306135	-1636
0.193601	0.142996	-1130
0.153862	0.157951	-1138
0.251769	0.030754	-1144
0.140284	0.0260676	-1148
0.195194	0.150976	-1148
0.198091	0.171266	-1148
0.204045	0.166963	-1152
0.243397	0.109636	-1150
0.147471	0.0561645	-1154
0.24919	0.150586	-1156
0.12179	0.218946	-1160
0.301699	-0.000519908	-1132
0.281736	-0.0258004	-1148
0.218765	-0.117723	-1148
0.21603	-0.229879	-1150
0.260954	-0.191167	-1158
0.339774	-0.162024	-1162
-0.0919306	-0.070202	-1148
0.214913	-0.199406	-666
0.270455	-0.235996	-680
-0.14926	-0.066567	-664
0.206849	0.153222	-652
0.241127	0.210798	-652
0.0290396	0.0723454	-656
0.0877503	0.0868993	-654
0.272682	-0.0166094	-658
0.146303	0.22699	-660
0.178915	0.135463	-662
0.141936	0.244973	-664
0.200222	0.137202	-666
0.244367	0.139796	-666
0.20496	0.0807112	-670
0.245549	0.0256795	-670
0.290445	0.0236456	-672
0.282244	0.071792	-676
0.163984	0.026003	-678
0.229997	0.00684932	-684
0.238628	0.197099	-686
0.223816	-0.342861	-190
0.374957	-0.203149	-176
0.242268	-0.156744	-170
0.237711	-0.104142	-172
0.124275	-0.0870629	-184
0.269494	-0.0761259	-178
-0.134462	-0.0571254	-170
0.0460441	-0.0440349	-184
0.0796705	0.019504	-182
0.180227	0.205148	-162
0.176896	0.183707	-164
0.0719651	0.0884107	-172
0.182839	0.163863	-176
0.102308	0.0458242	-180
0.141636	0.0520983	-184
0.26813	0.131106	-188
0.277275	0.10683	-194
0.184236	0.209424	-196
0.0518796	0.0710369	-198
0.251182	0.250074	-180
0.332653	-0.0657789	270
0.321521	-0.117477	272
0.32323	-0.0222301	278
0.352529	-0.207826	284
0.317138	-0.0494732	284
0.239753	-0.0984444	294
0.339043	-0.0423902	294
0.313766	-0.176798	302
0.292199	-0.114039	304
0.309305	-0.141646	310
-0.167043	-0.0648057	304
0.209717	0.145963	306
0.301589	0.0425215	302
0.184216	0.129998	300
0.280853	0.133064	296
0.0911977	0.160693	294
0.244007	0.0343416	292
0.372641	-0.00770098	282
0.224165	0.0976256	276
0.157035	0.105844	276
0.198978	0.171152	278
0.0804028	0.0844096	308
0.335121	-0.0837253	792
0.31736	-0.0250678	784
0.289251	-0.112415	758
0.361018	-0.0799018	1260
0.366254	-0.107643	1258
0.149937	0.171146	1254

## Sheet: Sheet2
0.342212	-0.138534	-198
0.280961	-0.177689	-182
