# Supplementary material for: Spinal premotor interneurons controlling antagonistic muscles are spatially intermingled
Source: eLife. 2022 Dec 13;11:e81976. doi: 10.7554/eLife.81976 (PMC9844990; doi:10.7554/eLife.81976)
Supplement: Figure 12—figure supplement 7—source data 2. [file elife-81976-fig12-figsupp7-data2.xlsx]

## Sheet: Sheet1
0.219073	0.113336	-4052
-0.0387592	0.0120683	-3536
0.285095	0.155976	-3540
0.240302	0.125733	-3048
-0.186819	-0.169686	-2084
-0.0190365	0.126424	-1608
0.180888	0.106516	-1132
0.232231	0.0694919	-1136
0.379256	0.0654135	-1140
0.352285	0.11746	-1146
0.136772	0.199433	-644
0.179957	0.347063	-644
0.238793	-0.0398383	-652
-0.171733	-0.171467	-674
0.0319716	0.0112945	-168
0.067559	0.0647035	-168
0.0192341	0.20844	-182
0.214734	0.190315	-176
0.128561	0.0978619	-198
0.200384	0.154846	-196
0.20283	0.135356	-198
0.103076	0.00700131	-196
-0.168446	-0.101167	-184
0.144524	0.215442	314
0.333733	0.164463	304
0.187222	-0.00205909	300
0.0893308	0.175638	304
0.0898312	0.035327	288
0.252393	0.0968579	280
0.201762	0.151852	280
0.152649	0.109608	274
-0.133376	-0.201542	280
-0.157323	-0.108377	284
-0.126173	-0.181852	288
0.00618645	-0.0564968	310
0.116652	0.0179311	792
0.254411	-0.0523332	790
0.15543	0.0188325	784
0.374802	-0.237991	780
0.227912	0.0211121	780
-0.140391	-0.179833	770
-0.111354	-0.182514	772
-0.139213	-0.152232	788
0.0222564	0.0702122	790
0.0428369	0.0251721	790
0.102228	0.0060565	790
0.143328	0.115975	790
0.0475824	0.0181024	790
0.174168	0.137832	790
0.274455	0.08678	790
0.320854	0.129302	790
0.310063	0.116221	790
0.116984	0.222444	790
0.110281	0.171184	790
0.175927	0.229663	790
0.166774	0.093723	790
0.136408	0.120404	1272
0.124698	0.0864884	1272
0.141509	0.26054	1270
0.1711	0.217927	1272
0.322013	0.126794	1272
0.157732	0.0866759	1268
0.26364	0.0967144	1262
0.0771751	0.118868	1256
0.0962042	0.399161	1258
0.224512	0.16146	1254
0.14091	0.214205	1248
0.209159	0.222564	1246
0.193401	0.196061	1246
0.254375	0.129044	1250
-0.144242	-0.16565	1268
0.15343	0.0407526	1258
0.0392668	0.0325386	1250
0.282075	0.00125481	1272
0.302818	-0.0444233	1262
0.195868	0.064046	1254
0.370988	-0.00937505	1254
0.131518	0.156576	1752
0.336535	0.0379793	1750
0.246238	0.20851	1746
0.180889	0.224805	1724
0.277536	-0.229406	-3056
0.304077	-0.129304	-2104
0.199246	0.157787	-2104
0.235425	-0.0590135	-2116
0.0948721	0.20148	-1608
0.195714	0.0745691	-1618
0.21665	0.176817	-1622
0.273577	-0.0391112	-1630
0.0681309	-0.0646839	-1624
0.157721	0.0848029	-1124
0.323621	-0.0332042	-1132
0.256796	0.0257766	-1134
0.343952	-0.0018835	-1136
0.301487	-0.024977	-652
0.314896	0.0673051	-662
0.318976	-0.0347726	-668
0.234702	0.0325403	-668
0.349916	-0.103842	-678
0.272482	-0.295602	-666
0.0703363	0.126478	-166
0.153786	0.102034	-170
0.335127	0.0102781	-178
0.210241	0.168998	-186
0.0987355	0.114409	-188
0.304408	0.0373948	-196
0.240764	0.00294979	-198
-0.200074	-0.158173	-196
0.288282	-0.0662573	276
0.224778	-0.147119	280
0.304227	-0.265058	292
0.337337	-0.107468	298
0.229351	0.199607	312
0.243215	0.123619	308
0.258516	0.144679	300
0.260166	0.0301096	298
0.255763	0.199886	306
0.133637	0.242658	306
0.201427	0.205535	288
0.121972	0.0511915	290
0.0945642	0.0998842	282
0.23434	0.144928	280
0.257046	0.159041	276
0.212841	0.13006	276
-0.174205	-0.145353	282
0.274322	-0.297498	790
0.254826	0.0199425	790
0.196248	-0.0606842	784
0.316335	-0.204878	778
0.248537	-0.0574213	778
0.30951	0.00873089	774
0.231668	-0.139784	772
0.230755	-0.259081	770
0.258537	0.0440567	770
-0.14121	-0.161365	776
0.215777	0.182604	790
0.155297	0.0878006	790
0.233543	0.19018	790
0.238493	0.192728	790
0.243803	0.156992	790
0.111492	0.214771	790
0.144335	0.214629	790
0.18538	0.23075	790
0.129634	0.237813	790
0.233471	0.218995	790
0.0776817	0.190396	790
0.268515	0.202449	790
0.133616	0.239623	790
0.17465	0.160866	790
0.221098	0.144633	790
0.244096	0.115059	790
0.236756	0.184868	790
0.279051	0.216037	790
0.295848	0.0781981	790
0.216745	0.122881	790
0.257204	0.177523	790
0.220558	0.160364	1276
0.167302	0.13813	1274
0.106905	0.129837	1264
0.217714	0.151991	1266
0.207462	0.183938	1258
0.187063	0.252073	1256
0.086917	0.200936	1252
0.087039	0.0967216	1250
0.238123	0.132765	1244
0.212685	0.135203	1244
0.193595	0.106731	1248
0.250039	0.061183	1264
-0.142967	-0.101734	1270
0.132344	0.00325963	1244
0.217182	-0.00351204	1274
0.259337	0.0303751	1254
0.255489	-0.011488	1254
0.211315	-0.129902	1264
0.144215	0.113336	1758
0.343445	-0.0601301	1758
0.344727	-0.169838	1738
0.327902	-0.0332977	1736
0.311194	-0.0409974	1736
0.331919	-0.00489982	1736

## Sheet: Sheet2
0.360704	-0.136193	284
