# Supplementary material for: Spinal premotor interneurons controlling antagonistic muscles are spatially intermingled
Source: eLife. 2022 Dec 13;11:e81976. doi: 10.7554/eLife.81976 (PMC9844990; doi:10.7554/eLife.81976)
Supplement: Figure 12—figure supplement 7—source data 3. [file elife-81976-fig12-figsupp7-data3.xlsx]

## Sheet: Sheet1
0.227925	0.0901518	-4032
-0.209242	-0.015084	-4026
0.183182	-0.0238498	-3534
0.171953	-0.151542	-3554
0.208849	-0.102908	-3558
0.220676	0.123587	-3558
0.0396054	-0.0132186	-3562
0.225688	-0.0879097	-3558
0.113509	0.0607978	-3074
-0.0505644	-0.0553103	-3042
-0.181965	-0.0045781	-3010
-0.145198	-0.0529785	-3016
-0.182167	-0.0158873	-3008
0.0796075	0.060197	-2582
0.0718132	0.0256874	-2592
0.129703	0.245344	-2590
0.301516	0.0442077	-2598
0.15716	0.106904	-2602
0.198725	0.0917579	-2606
0.100758	0.10606	-2604
0.153433	-0.135564	-2576
-0.134748	-0.062728	-2594
-0.0692978	-0.115694	-2588
-0.0677177	-0.0672195	-2578
0.0632322	0.220412	-2094
0.244824	0.221005	-2096
0.104813	0.114834	-2098
0.151499	0.112647	-2098
0.281421	0.0867279	-2092
0.2284	0.105694	-2094
0.260013	0.146428	-2102
0.324956	0.0869897	-2106
0.265345	0.188494	-2110
0.251426	0.239347	-2104
0.289171	-0.0729675	-2098
0.296317	0.0319637	-2096
0.261888	0.0301696	-2106
-0.0543456	0.0436758	-2102
-0.0393819	-0.0514145	-2110
-0.0683137	-0.0505444	-2118
0.0360533	0.0365762	-2120
-0.185438	-0.11436	-1622
-0.0881146	-0.155399	-1620
-0.105943	-0.0321772	-1642
-0.171289	-0.103308	-1640
-0.189415	-0.156702	-1640
0.198848	0.13109	-1620
0.228264	0.202044	-1620
0.126344	0.29723	-1620
0.152132	0.206989	-1624
0.160132	0.16862	-1640
0.0543037	0.130308	-1642
0.114241	0.163598	-1646
0.216762	0.182441	-1644
0.107146	0.228234	-1650
0.124481	0.134985	-1650
0.202476	0.177545	-1620
0.265731	0.0825209	-1608
0.280567	0.0428278	-1620
0.232739	-0.0190612	-1628
0.303444	-0.0011834	-1626
0.141083	0.0707785	-1634
0.177072	0.0301414	-1638
0.144722	-0.00805838	-1642
0.297994	0.103294	-1648
0.319845	-0.0421163	-1650
0.106613	0.0892621	-1644
0.166699	0.0360021	-1640
0.0472206	0.0110873	-1630
-0.12818	-0.108771	-1138
-0.0598584	-0.138745	-1140
-0.109147	-0.081365	-1140
-0.0605372	0.176904	-1148
-0.0786819	0.0419372	-1152
-0.120751	-0.111091	-1154
-0.148095	-0.107801	-1146
-0.311613	0.0511431	-1152
0.149053	0.0290475	-1136
0.260998	0.192624	-1140
0.0774131	-0.0181127	-1144
0.120719	0.0498446	-1146
0.171277	0.0008243	-1142
0.183122	0.128314	-1140
0.0845948	0.0964358	-1148
0.217781	0.185395	-1148
0.196603	0.131822	-1146
0.188007	0.25368	-1144
0.169304	0.244226	-1148
0.247047	0.178042	-1144
0.133351	-0.0201406	-1152
0.105962	0.197854	-1152
0.213314	0.237734	-1152
0.192993	-0.0242767	-1152
0.0434711	0.0129116	-1154
0.0383893	0.0363859	-1150
0.294654	-0.0978875	-1134
0.309049	0.0916505	-1140
0.29409	0.107845	-1140
0.257236	-0.0914025	-1152
0.300167	-0.0942474	-1152
0.332904	-0.0860701	-1146
0.317196	0.00291788	-1148
0.234542	0.047824	-1142
0.284294	-0.169142	-1152
0.254596	-0.142691	-1138
0.273883	-0.193645	-1132
-0.0568846	-0.148521	-652
-0.113918	-0.108969	-658
-0.0944036	-0.0889734	-666
-0.0824707	-0.0642161	-662
-0.0372601	-0.113175	-664
-0.111157	-0.175655	-668
-0.143462	-0.133294	-652
-0.0322282	0.257953	-648
0.164884	0.14281	-652
0.170448	0.13341	-652
0.0580923	0.208315	-652
0.220916	0.13138	-656
0.203165	0.169774	-664
0.0595971	0.146344	-668
0.0608718	0.064139	-670
0.184657	0.165769	-670
0.150981	0.111547	-678
0.197635	0.138974	-680
0.215793	0.135949	-680
0.249971	0.13571	-684
0.234291	0.0552409	-686
0.223019	0.0883329	-684
0.0872055	0.147895	-684
0.154341	0.204263	-686
0.221975	0.0437574	-678
0.247494	-0.0397907	-646
0.29464	-0.095101	-654
0.237741	-0.0930173	-654
0.217144	-0.149107	-658
0.257529	0.0292488	-660
0.155079	-0.0161293	-668
0.171981	0.0161756	-668
0.168651	0.00445292	-674
0.143002	0.030854	-672
0.200745	-0.0173332	-684
0.16498	-0.00578802	-678
0.138694	-0.0797589	-678
0.116649	-0.0398524	-684
0.055629	0.0072003	-666
0.115964	0.0163762	-670
0.263466	-0.225339	-648
0.239332	-0.349975	-650
0.2095	-0.235318	-670
0.194294	-0.282533	-678
0.189713	-0.209874	-684
0.258612	-0.176504	-684
-0.0984853	0.080129	-178
-0.238001	0.189642	-180
-0.23944	0.00857114	-202
-0.336897	0.0285938	-202
-0.20825	0.0797148	-202
-0.321692	0.158123	-178
-0.102916	-0.102675	-172
-0.185794	-0.131671	-170
-0.106965	-0.128153	-172
-0.093668	-0.10611	-170
-0.103993	-0.0694358	-174
-0.0673981	-0.0607754	-176
-0.148112	-0.086578	-178
-0.125098	-0.0722206	-178
-0.101633	-0.0948624	-178
-0.140446	-0.102835	-188
-0.0416226	-0.0984183	-188
-0.0416226	-0.0984183	-188
-0.0995134	-0.0529626	-192
0.00701543	0.0420846	-192
0.0375935	-0.00207109	-186
0.0328007	0.00890251	-184
-0.0277484	0.00302061	-182
-0.0613911	0.0658926	-172
0.0899767	0.0523062	-172
0.0743303	0.0318693	-206
0.276064	0.0434037	-170
0.235925	0.0256497	-170
0.228973	0.125094	-174
0.223358	0.113439	-174
0.257823	0.0727878	-174
0.299509	0.0247257	-176
0.223603	0.0874638	-176
0.189779	0.171493	-180
0.124579	0.183932	-180
0.235768	0.119601	-182
0.247523	0.0568626	-178
0.108203	0.105791	-180
0.182773	0.0571749	-182
0.182019	0.112642	-182
0.22887	0.0987752	-190
0.198958	0.114114	-192
0.224034	0.119856	-192
0.215422	0.0693211	-194
0.109407	0.08148	-198
0.11726	0.144193	-200
0.223157	0.0399689	-200
0.219172	0.0169957	-204
0.0967914	0.106193	-208
0.230344	0.0695186	-208
0.266449	0.120461	-206
0.235959	0.151215	-192
0.150981	0.0293522	-194
0.278439	0.107703	-184
0.222922	0.0779878	-184
0.228234	0.0449841	-184
0.252169	-0.0243688	-170
0.309413	-0.0248786	-172
0.191336	-0.104332	-174
0.128848	-0.0413518	-176
0.143016	0.0066275	-182
0.158687	-0.0642294	-188
0.17169	-0.0700603	-196
0.153135	0.00632798	-196
0.245707	-0.0210487	-206
0.19958	0.00574171	-208
0.258724	-0.0817285	-206
0.17823	-0.087279	-208
0.149003	-0.00363875	-206
0.31638	-0.0502415	-196
0.168879	-0.127299	-186
0.285577	-0.0206281	-208
0.405074	-0.146283	-206
0.365953	-0.019908	-174
0.263938	-0.184499	-182
0.263076	-0.204662	-188
0.117407	-0.15516	-200
0.2636	-0.282006	-178
0.0918053	0.381061	300
0.239539	0.216741	312
0.313246	0.128623	312
0.226413	-0.00995409	308
0.0988173	0.00230304	310
0.157201	0.0687281	312
0.120436	0.0700573	312
0.220309	0.0573983	308
0.177043	0.0507983	308
0.182641	0.187335	306
0.262739	-0.026655	310
0.185669	0.202521	298
0.272641	0.20834	296
0.248161	0.253582	300
0.281841	0.120438	300
0.174765	0.0926473	296
0.202521	0.163099	292
0.234003	0.174073	288
0.216139	0.162434	280
0.156255	0.00470656	278
0.2142	-0.0283089	278
0.205234	-0.00102787	282
0.169864	0.0572824	284
0.112526	0.0583798	280
0.113051	0.0156112	280
0.157244	0.0473592	278
0.263107	0.0780484	278
0.165503	0.0103251	292
0.193164	-0.00678548	290
0.246599	0.0607061	286
0.118745	0.102053	296
0.119853	0.194793	296
0.101105	0.0830487	298
0.272025	0.117664	292
0.214376	0.0620431	290
0.362292	0.0563318	290
0.353355	0.092369	284
0.201351	0.221324	282
0.202965	0.232414	280
0.082706	0.130439	312
0.0786842	0.114549	312
0.0448757	-0.00694004	306
0.0220533	-0.0179684	304
0.00763293	-0.0920445	302
-0.0538986	0.050381	300
0.0491268	0.0297386	298
0.0462227	0.122734	296
0.0883185	0.120485	290
0.084865	-0.00152248	288
0.11074	0.0165	292
0.0610491	0.103714	294
0.0877978	0.0641606	280
0.178232	-0.287254	310
0.330686	-0.239331	310
0.243064	-0.202204	290
0.185832	-0.271249	284
0.204145	-0.164312	278
0.17624	-0.114905	280
-0.255197	0.116041	292
-0.0936443	0.0165386	308
-0.0989272	-0.103428	304
-0.124945	-0.137758	294
-0.138081	-0.195898	300
-0.0941124	-0.172952	292
-0.140177	-0.0970215	286
-0.169424	-0.118924	284
0.339254	-0.251723	746
0.347007	-0.253624	766
-0.118813	-0.0641517	772
-0.0825162	-0.127454	776
-0.101036	-0.10385	766
-0.0464038	-0.0228279	766
-0.0050535	-0.0041868	758
0.0230296	-0.0336903	758
0.0231849	-0.0416068	756
-0.0864628	-0.126235	754
-0.0814676	-0.152125	746
-0.113653	-0.167915	746
-0.0181314	-0.0864571	744
-0.0365395	-0.0384649	742
0.202101	0.23671	774
0.19064	0.125125	770
0.224873	0.109241	768
0.130464	0.200226	760
0.132483	0.211902	762
0.162964	0.186091	758
0.176144	0.110301	758
0.190193	0.200901	754
0.0998903	0.156138	754
0.111245	0.169301	752
0.199751	0.143476	750
0.250874	0.11284	746
0.261724	0.149796	752
0.107706	0.219506	744
0.0767491	0.173299	744
0.245005	0.185083	744
0.218242	0.179887	746
0.202169	0.103277	764
0.169731	0.0148679	774
0.141614	0.0377393	772
0.148979	0.00712555	770
0.13191	0.064217	772
0.161435	-0.0057106	772
0.0793899	0.0862757	766
0.0974582	0.039488	762
0.178732	0.0395968	764
0.19662	0.0591449	762
0.12826	0.07923	760
0.212189	0.0724818	758
0.168406	0.021217	756
0.0648071	-0.00790921	754
0.166401	0.0719883	750
0.117978	0.0693181	752
0.0906037	0.0712917	744
0.115352	0.0637381	742
0.138207	0.0146574	746
0.118934	0.0815084	766
0.278836	0.0637018	774
0.266544	0.0942285	770
0.316341	0.0851292	766
0.31605	0.0501546	756
0.267054	-0.00489791	760
0.321433	0.0891637	750
0.285316	0.0821397	752
-0.274251	-0.174403	1264
-0.0993659	-0.122364	1264
-0.173863	-0.0765321	1256
-0.206783	-0.018678	1254
-0.123013	-0.119841	1254
-0.137926	-0.117543	1254
-0.166699	-0.0722541	1252
-0.0981633	-0.0960005	1244
-0.179837	-0.138831	1240
0.166262	0.100663	1276
0.132016	0.0639882	1270
0.164384	-0.0159155	1270
0.172699	0.0356739	1272
0.190134	0.0361089	1268
0.193883	0.179675	1266
0.189349	0.0407204	1264
0.160377	0.0226152	1262
0.157856	0.0601453	1258
0.133386	0.117282	1256
0.194519	0.165637	1258
0.178255	0.0513356	1254
0.152698	-0.0155602	1254
0.155477	0.00741756	1250
0.213459	0.066961	1248
0.224154	-0.0511398	1252
0.245903	-0.0284158	1250
0.175734	0.0961237	1244
0.111572	0.114446	1242
0.156023	0.039147	1246
0.140499	0.0644233	1238
0.107559	0.108182	1236
0.180937	-0.0373416	1242
0.31458	-0.154297	1256
0.244855	-0.190457	1254
0.223305	-0.197932	1242
0.200513	-0.28927	1262
0.160216	-0.31409	1244
0.253865	-0.272325	1238
0.191761	-0.247107	1238
0.159425	0.0335784	1240
-0.0478118	-0.104549	1752
-0.115598	-0.0778813	1748
-0.0786204	-0.0629983	1744
-0.222722	-0.18303	1740
-0.186802	-0.0938764	1732
-0.136147	-0.0844526	1730
-0.111153	-0.0574018	1720
0.207731	0.210875	1746
0.193956	0.216594	1744
0.105504	0.24974	1742
0.21047	0.151495	1736
0.14766	0.258839	1724
0.304247	-0.0752383	1750
0.240202	0.0427065	1750
0.303623	-0.0138793	1742
0.302082	0.0241984	1732
0.247227	0.0235052	1730
0.168894	0.0599726	1734
0.27323	0.0605142	1722
0.238717	0.016089	1720
0.192488	0.0206456	1720
0.271194	0.0307553	1718
0.271537	-0.00970537	1730
0.305641	-0.11601	1726
0.370333	-0.201069	1724
0.29329	-0.103748	1720
-0.126844	0.0503963	2218
0.25382	0.0724038	2232
0.216425	0.216961	2222
0.215485	0.0538175	2220
0.0623568	0.128114	2212
0.0448245	0.00028308	2212
0.203188	0.204222	2212
0.232657	0.0929634	2216
0.253729	-0.0853688	2232
0.379863	0.0436105	2230
0.28235	-0.100024	2206
0.277475	0.409539	2704
0.228841	0.161466	2712
0.208143	0.0902971	2702
0.191897	0.216322	2692
0.0263278	0.0445221	2682
0.30506	-0.089371	2680
0.323157	-0.122912	2704
-0.205228	-0.0536896	2708
-0.221268	-0.0863204	2682
-0.206025	-0.0242181	-4026
0.127269	0.113228	-3538
0.162245	0.153915	-3562
0.199401	-0.0343863	-3048
0.21583	0.048859	-3058
0.0551123	0.100588	-2580
0.190562	0.0320028	-2586
0.33591	-0.0122772	-2572
0.270488	-0.0427614	-2584
0.341621	-0.0381816	-2590
0.20197	-0.137725	-2594
0.226238	-0.0648894	-2594
0.286899	-0.0252294	-2600
0.212435	-0.0268444	-2604
0.144262	0.15958	-2092
0.20044	0.135193	-2116
0.322739	-0.109521	-2090
0.334868	0.00684552	-2100
0.341623	-0.0514222	-2100
0.226959	-0.0372153	-2106
0.197526	-0.0304237	-2110
0.191248	0.0344971	-2100
0.172528	-0.000154005	-2122
-0.0218775	-0.0176182	-2100
-0.0419471	-0.100758	-2112
0.0113357	-0.0559731	-2110
0.0514811	0.0380623	-2112
-0.215994	-0.0802809	-1622
-0.142338	-0.0213927	-1620
0.00361032	-0.0588459	-1632
-0.0413696	-0.00849511	-1636
-0.0598968	-0.0430673	-1642
-0.236476	-0.128293	-1638
0.17302	0.28248	-1626
0.203169	0.137993	-1632
0.24843	0.20451	-1630
0.0736562	0.212251	-1638
0.141828	0.15611	-1642
0.132607	0.170719	-1642
0.0771404	0.129216	-1638
0.134275	0.179017	-1646
0.141398	0.197832	-1648
0.284361	-0.000521259	-1622
0.177794	0.0602547	-1622
0.186905	-0.0238863	-1626
0.166155	0.0138134	-1630
0.249713	0.0604097	-1624
0.257393	0.0659181	-1624
0.205433	0.00428278	-1634
0.256441	-0.0177439	-1642
0.292619	-0.0266969	-1646
0.321903	0.0339593	-1650
0.179845	0.0111718	-1652
0.205284	-0.0819081	-1644
0.274734	0.0842467	-1632
0.146756	-0.00517737	-1650
0.321805	-0.10347	-1620
0.243759	-0.125708	-1636
0.20035	-0.0882689	-1640
-0.127533	0.00334097	-1142
0.28904	0.0458252	-1134
0.127457	0.063865	-1138
0.176949	0.18255	-1142
0.0886869	0.210977	-1140
0.0559186	0.182396	-1136
0.0665707	0.114249	-1142
0.299679	0.0390339	-1138
0.264957	0.0436223	-1138
0.262298	0.0847205	-1140
0.216772	0.0375968	-1140
0.16072	0.0596195	-1148
0.16629	0.0546664	-1148
0.15685	0.153743	-1150
0.174449	0.161351	-1146
0.224315	0.155136	-1144
0.0914339	0.0975665	-1142
0.14944	-0.0241527	-1152
0.241191	0.0779802	-1152
0.293252	0.00731657	-1152
0.183572	0.125505	-1150
0.289611	-0.0396175	-1138
0.321288	0.0332492	-1140
0.224277	-0.0792276	-1140
0.24876	-0.0732095	-1152
0.330036	-0.0380491	-1152
0.21766	-0.0379762	-1146
0.334484	-0.0601812	-1142
0.241971	-0.152102	-1148
0.186827	-0.164729	-1148
0.217463	-0.103876	-1144
0.301259	-0.182965	-1142
0.218459	-0.191931	-1138
0.22651	-0.160264	-1134
-0.0399055	-0.0450539	-656
-0.195703	-0.118508	-664
0.189032	0.164935	-650
0.164184	0.120916	-652
0.0852934	0.174497	-652
0.220067	0.108668	-658
0.212817	0.141714	-660
0.200893	0.11218	-658
0.158045	0.133518	-660
0.0827151	0.0845128	-662
0.078656	0.101823	-660
0.206241	0.0817268	-682
0.195483	0.067905	-680
0.161045	0.204101	-662
0.222348	0.127143	-668
0.293222	-0.00787942	-650
0.228804	-0.0686845	-654
0.126948	-0.0839263	-652
0.308016	-0.0579728	-650
0.21504	-0.10934	-656
0.198507	-0.173232	-656
0.31081	-0.0214465	-664
0.277359	-0.0667166	-672
0.264037	-0.156516	-680
0.315055	-0.117034	-678
0.218011	-0.109926	-678
0.195291	-0.110952	-678
0.16185	-0.113329	-678
0.156497	-0.103343	-684
0.18216	-0.0728056	-684
0.271043	-0.0771041	-676
0.320639	-0.108691	-684
0.266069	-0.0630817	-684
0.224088	-0.153236	-684
0.241369	-0.174343	-662
0.0907902	-0.175578	-668
0.234952	-0.329145	-652
0.222267	-0.244717	-654
0.195881	-0.283289	-660
0.16348	-0.267615	-666
0.207976	-0.285982	-670
0.271805	-0.332773	-682
-0.257231	0.210703	-206
-0.116428	-0.155052	-178
-0.109084	-0.13522	-186
-0.0911027	-0.0991257	-188
0.0336085	-0.129096	-188
-0.0463763	0.280566	-176
0.194405	0.0455003	-170
0.200608	0.083602	-176
0.173183	0.107684	-176
0.257706	0.0642357	-184
0.248164	0.100235	-180
0.210752	0.0666828	-180
0.191977	0.0581881	-178
0.146032	0.100069	-176
0.133195	0.124202	-174
0.209312	0.00527651	-174
0.102935	0.0303654	-174
0.112443	0.0372478	-186
0.235088	0.104198	-192
0.23921	0.0822319	-194
0.182338	0.0754196	-194
0.130287	0.156167	-200
0.197676	0.0363429	-196
0.249011	0.0278036	-200
0.178078	0.0543327	-202
0.19514	0.0733422	-202
0.210228	0.0706529	-202
0.143833	0.134353	-208
0.21531	0.0548425	-208
0.25373	0.078625	-202
0.24201	0.0849976	-182
0.162241	0.0722652	-170
0.101261	0.0651725	-190
0.270038	-0.0193599	-176
0.161644	-0.041014	-176
0.199154	-0.0849913	-180
0.271947	-0.0110055	-192
0.320629	-0.0415939	-192
0.239166	-0.119888	-192
0.234226	-0.0337174	-196
0.155505	-0.106684	-206
0.189945	-0.120015	-204
0.21576	-0.144518	-196
0.256252	-0.122303	-196
0.241012	-0.135309	-174
0.195203	-0.128644	-170
0.291975	-0.0135736	-194
0.334924	-0.215419	-174
0.26972	-0.273346	-190
0.302114	-0.277074	-204
0.233531	-0.230783	-206
0.233105	-0.258816	-206
0.284597	-0.260817	-176
0.251885	-0.260116	-186
0.244228	-0.272957	-184
0.181701	-0.197958	-192
0.0878667	-0.0762799	-200
0.275703	0.0641529	312
0.122175	0.0320958	312
0.214037	0.126513	310
0.232628	0.11778	308
0.235432	0.140339	308
0.242496	0.130014	312
0.168904	0.107447	308
0.141553	0.188981	302
0.0927559	0.178239	306
0.200572	0.10965	302
0.193427	0.0713016	302
0.282151	0.0549175	302
0.310127	0.0412848	300
0.2965	0.0111211	304
0.18181	0.119797	292
0.250845	0.134295	286
0.224598	0.185975	286
0.211453	0.157534	286
0.206285	0.08961	284
0.182526	0.0840147	280
0.22498	0.100136	280
0.157578	0.181492	280
0.221111	0.00935128	292
0.285413	0.00949039	292
0.201236	0.0794782	300
0.205306	0.0704206	296
0.161877	0.0809929	292
0.114623	0.0788908	294
0.221947	0.13819	292
0.202048	0.123553	290
0.1862	0.0837442	288
0.134135	0.0186021	304
-0.0798258	-0.0451026	312
0.0868664	0.0691454	286
0.079329	0.0364623	280
0.132678	0.0657449	278
0.155668	0.0637588	282
0.206099	-0.170402	310
0.263207	-0.282154	312
0.211281	-0.266257	306
0.175758	-0.232229	304
0.349004	-0.308832	304
0.307567	-0.325765	284
0.241393	-0.328508	282
0.223352	-0.216061	280
0.230669	-0.223797	282
0.270874	-0.365388	296
0.239062	-0.11424	282
0.235508	-0.166113	286
-0.292206	0.168856	292
-0.139829	-0.111365	296
-0.119137	-0.178718	296
0.316938	-0.156769	746
0.372599	-0.0981468	750
0.334749	-0.135545	762
0.30722	-0.255359	766
0.348871	-0.19686	764
0.268083	-0.193101	770
0.343856	-0.241224	770
0.279146	-0.237088	768
0.239806	-0.295696	766
0.254301	-0.246056	774
0.268229	-0.218889	748
0.251257	-0.232632	742
-0.126299	-0.0376522	772
-0.123828	-0.147373	766
-0.0484815	0.0809352	770
0.152571	0.127563	764
0.131624	0.151269	762
0.219752	0.134166	764
0.232116	0.113218	750
0.198203	0.183457	746
0.234514	0.121954	742
0.156183	0.0799483	772
0.20847	-0.044502	768
0.208936	0.00585572	768
0.0857347	0.101673	762
0.29052	-0.0387116	776
0.270384	0.00513736	772
0.426644	-0.0597254	766
0.283209	-0.0221893	756
0.302904	-0.0564819	750
0.255452	-0.0838231	774
-0.00123476	-0.0789176	1274
-0.139939	-0.0700499	1270
-0.136878	-0.131	1268
-0.099218	-0.0322515	1246
-0.227144	-0.137627	1246
-0.0184892	0.0747049	1266
0.194037	0.121269	1274
0.27474	0.0597538	1264
0.0768316	0.111336	1256
0.267724	0.0841962	1256
0.155721	0.115563	1246
0.165258	0.135931	1248
0.237691	-0.0838119	1256
0.250855	-0.0750674	1248
0.216983	0.124141	1244
0.283126	-0.0587169	1264
0.190172	0.134531	1268
0.218031	-0.17056	1246
0.264785	-0.108639	1238
0.260708	-0.121095	1246
0.22515	-0.308369	1244
0.219774	-0.255866	1248
0.120624	0.159265	1748
0.172465	0.30091	1732
0.294868	-0.0186814	1750
0.287409	-0.0419627	1752
0.274007	-0.0522314	1740
0.27537	-0.0700823	1722
0.257028	0.0635976	1728
0.201598	-0.243725	1720
-0.180684	-0.106147	2222
0.261765	-0.0608137	2220
0.378299	0.0864203	2214
0.288186	-0.074175	2206
0.307832	-0.0442964	2702
-0.222676	-0.0101325	2708

## Sheet: Sheet2
0.29317	-0.231771	-172
0.379499	-0.166318	-176
0.316928	-0.226163	-202
0.279986	-0.222244	-204
0.27815	-0.236684	-208
0.248938	-0.189215	-206
0.345865	-0.153562	308
0.297331	-0.161847	280
0.279791	-0.15367	278
0.351602	-0.27839	278
0.298195	-0.119866	286
0.351351	-0.137599	754
0.376352	-0.0449446	754
0.359323	-0.0697026	758
0.381381	-0.144441	754
0.396323	-0.182913	772
0.303371	-0.185613	1246
0.300992	-0.20258	1242
0.324587	-0.154884	1238
0.276502	-0.170647	1234
