# Supplementary material for: Spinal premotor interneurons controlling antagonistic muscles are spatially intermingled
Source: eLife. 2022 Dec 13;11:e81976. doi: 10.7554/eLife.81976 (PMC9844990; doi:10.7554/eLife.81976)
Supplement: Figure 12—figure supplement 8—source data 1. — The x-y coordinates are normalized (between –0.5 and 0.5) and scaled to an idealized spinal cord of dimensions 1700 μm and 900 μm in the mediolateral and dorsoventral directions respectively, while z coordinates are in micron, with the axis origin taken at the border between L4 and L5 and negative values in the rostral direction. [file elife-81976-fig12-figsupp8-data1.xlsx]

## Sheet: Sheet1
0.0674485	0.129883	-3524
0.206875	-0.0167116	-3046
-0.116474	-0.104981	-3030
0.1819	-0.0622194	-3032
0.172237	0.130552	-3056
0.0919368	0.0532848	-3032
0.142089	0.13807	-2548
0.398274	-0.0165722	-2574
-0.0895743	-0.161988	-2572
0.2765	-0.0300511	-2568
-0.160902	-0.110948	-2574
0.20669	0.220619	-2568
0.217272	0.154697	-2570
0.302319	-0.0429187	-2562
0.127366	0.10864	-2562
0.0183432	0.0785389	-2550
0.25408	0.103303	-2086
-0.15532	-0.0756091	-2084
-0.110242	-0.059718	-2070
-0.0852469	-0.115026	-2074
-0.164511	-0.207183	-2070
-0.0941836	-0.0314253	-2082
0.14983	0.317785	-2088
0.0971443	0.232379	-2088
0.189302	0.100833	-2096
0.156072	0.104173	-2104
0.194036	0.125558	-2104
0.0855812	0.2327	-2102
-0.140218	0.0610023	-1592
-0.130191	-0.0440868	-1592
0.220485	0.243901	-1602
0.139911	0.322056	-1590
0.114292	0.144918	-1592
0.206077	0.171341	-1590
0.258204	0.0988176	-1600
0.237071	-0.0103996	-1598
0.324493	0.0501856	-1606
0.237758	-0.00206409	-1604
0.201555	0.0860735	-1602
0.141089	0.224598	-1608
0.0712183	0.0277049	-1610
0.177592	0.00363076	-1610
-0.153476	-0.200699	-1614
0.344354	0.112494	-1612
0.108899	0.0611746	-1606
0.130337	0.100535	-1592
0.268929	0.172854	-1108
0.204538	0.16151	-1106
0.170721	0.20513	-1108
0.113486	0.193401	-1126
0.319191	0.00608337	-1130
0.328721	0.00474222	-1138
0.259139	-0.0159605	-1142
0.195465	-0.0101809	-1108
0.0806464	0.0499563	-1116
0.159802	0.127506	-1118
0.226439	-0.18854	-1118
0.234529	-0.251982	-1116
-0.0874192	-0.139669	-1114
-0.187945	-0.170018	-1124
-0.115624	-0.196394	-1130
-0.0641757	-0.11968	-1134
-0.0845657	-0.169727	-1140
-0.107557	-0.142628	-1142
-0.158773	-0.169486	-1134
0.21442	0.21099	-1140
0.168259	0.226069	-1136
0.226875	0.164817	-1136
0.242803	0.149355	-1136
0.26086	0.130082	-1130
0.265206	0.166343	-1128
0.120674	0.230738	-1120
0.232093	0.202503	-1116
0.25891	0.195443	-1110
0.20834	0.160708	-1106
0.257654	0.179782	-1118
0.272637	0.116082	-1128
0.327747	0.142699	-1132
0.359015	0.145147	-1142
0.121257	0.303585	-1128
0.253876	-0.0184636	-1124
0.292396	0.00673403	-1122
0.202617	0.0245022	-634
0.115786	-0.0233598	-628
0.245898	-0.0131275	-640
0.0521362	0.0183501	-170
0.282443	-0.0605424	-166
0.35767	-0.0553908	-166
0.242188	-0.180868	-160
0.230816	-0.1771	-156
0.326029	0.0213445	-150
0.22554	-0.264422	-148
0.364565	-0.245029	-150
0.283515	-0.289741	-150
0.0406262	0.0154732	-152
0.228166	0.328901	-158
0.161635	-0.175274	-160
-0.254225	0.136806	-166
-0.100067	-0.18601	-168
-0.0877475	-0.108078	-166
-0.177022	-0.127987	-166
-0.148417	-0.164122	-164
-0.0753571	-0.171556	-164
0.104616	0.189304	-170
0.135494	0.344227	-174
0.245983	0.19129	-174
0.142721	0.0883695	-164
0.213062	0.138392	-162
0.244431	0.220734	-158
0.205906	0.113087	-154
0.32165	0.102953	-150
0.101279	0.302708	-150
0.0818186	0.177964	-154
0.133475	0.109638	-156
0.150156	0.114306	-158
0.219057	0.160235	-164
0.0870375	-0.0287667	-148
0.153874	0.0192509	-146
0.136158	0.0578557	326
0.269603	0.0508607	320
0.296752	-0.0469667	304
0.0368163	0.014667	300
0.211982	-0.0226291	298
0.276789	-0.0129199	306
0.261067	-0.0100187	316
0.260149	0.104861	320
0.295596	-0.21704	322
0.344792	-0.168558	322
0.220796	-0.237857	328
0.316999	-0.150893	328
-0.104418	-0.106094	330
0.0567809	-0.00352529	328
-0.154255	-0.0479171	332
0.259491	0.170799	310
0.207221	0.220408	312
0.179689	0.128985	328
0.229968	0.0975867	326
0.144843	0.106793	324
0.123747	0.108485	314
0.0527019	0.125319	312
0.22724	0.0896229	310
0.255108	0.0783487	304
0.244928	0.130187	298
0.302999	0.0985335	296
0.154169	0.0736282	328
0.0657872	0.217715	302
0.21288	0.210947	786
0.261025	-0.0760656	804
0.245228	-0.0426056	782
0.242962	-0.055525	776
0.25526	-0.0603395	782
0.275919	-0.232938	780
0.40024	-0.084157	810
0.26037	0.031647	802
0.242276	-0.0051167	804
0.226809	-0.113017	806
0.266197	-0.14864	788
0.20711	-0.24955	784
-0.140239	-0.0205022	782
-0.0919097	-0.1287	778
-0.118639	-0.154644	1268
-0.0993128	0.00818682	1280
0.156688	0.29099	1280
0.252509	0.252914	1254
0.217516	0.218334	1268
0.305414	-0.115971	1274
0.0683205	0.0573709	1270
0.169611	0.0883629	1278
0.309968	0.00411448	1284
0.289552	0.0314554	1280
0.296949	0.0598775	1286
0.148274	0.0702761	1292
-0.104965	-0.158466	1288
-0.19222	-0.136392	1760

## Sheet: Sheet2
0.387088	-0.183013	306
