# Supplementary material for: Spinal premotor interneurons controlling antagonistic muscles are spatially intermingled
Source: eLife. 2022 Dec 13;11:e81976. doi: 10.7554/eLife.81976 (PMC9844990; doi:10.7554/eLife.81976)
Supplement: Figure 12—figure supplement 8—source data 2. [file elife-81976-fig12-figsupp8-data2.xlsx]

## Sheet: Sheet1
0.0671123	0.130804	-4024
0.207409	-0.0070677	-3530
-0.11064	-0.105155	-3530
0.16515	-0.061056	-3532
0.16627	0.12154	-3556
0.237882	-0.230727	-3544
0.220483	0.111971	-3050
0.0870091	0.051367	-3048
0.0873358	0.194393	-3062
0.224331	0.151417	-3062
0.136715	0.113267	-3070
0.0311405	0.0830692	-3074
-0.136044	-0.0672485	-3070
0.259695	0.114445	-3068
0.309026	-0.0251207	-3074
0.0802952	0.233016	-3072
0.042144	0.0661158	-2586
0.192443	0.133674	-2576
0.155083	0.108333	-2574
0.0954882	0.23526	-2572
0.150402	0.324189	-2576
0.187314	0.106992	-2574
-0.0880466	-0.0361036	-2572
-0.0803571	-0.118475	-2576
-0.159861	-0.214326	-2582
-0.144814	-0.203963	-2582
-0.0725494	-0.153523	-2586
-0.0626977	-0.125661	-2592
0.346473	0.108786	-2592
0.062761	0.0240542	-2590
0.0988585	0.0577968	-2586
0.122327	0.0944794	-2584
0.16584	0.00046772	-2596
0.202241	0.15045	-2596
0.272253	0.162121	-2590
0.307604	0.0136827	-2576
0.316311	0.0120642	-2104
0.240408	-0.0120122	-2102
0.168497	0.193963	-2102
0.109109	0.1859	-2090
0.201495	-0.0767135	-2092
0.149724	0.123768	-2088
0.0667093	0.0515012	-2106
0.201868	-0.186836	-2108
0.211745	-0.253178	-2114
-0.140307	0.0631194	-2120
-0.130236	-0.0389712	-2122
0.200783	0.16134	-2120
0.215194	0.237232	-2120
0.137583	0.317014	-1638
0.112562	0.142471	-1640
0.254177	0.0852024	-1638
0.233584	-0.0165851	-1640
0.319757	0.0412408	-1638
0.199368	0.0768076	-1634
0.138856	0.224044	-1624
0.153493	0.143085	-1606
0.233786	-0.00821151	-1628
-0.257303	-0.0204473	-1134
-0.18329	-0.121479	-1144
0.253408	-0.00163206	-1128
0.241364	-0.0385865	-1136
0.20408	-0.0413532	-1138
0.0498556	0.0587307	-1142
0.151025	0.1589	-1144
0.116448	0.23054	-1154
0.392937	-0.0495524	-1146
-0.0549957	0.156256	-1160
0.218726	0.186712	-1134
0.0472217	0.0348897	-1146
0.308221	-0.0511495	-664
0.253214	0.134568	-664
0.189175	0.163374	-664
0.106438	0.0895662	-656
0.118012	0.164798	-648
0.142976	0.198288	-678
0.149168	-0.0341698	-182
0.299563	-0.116989	-186
0.269056	-0.257325	-170
-0.261566	0.00722685	-170
0.0886436	0.0864854	-178
0.246242	0.164935	-192
0.19598	0.112723	-194
0.187662	0.124302	-202
0.200415	0.148318	-196
-0.0868763	-0.165104	280
-0.0421808	-0.105902	296
0.111069	0.0720209	302
0.25202	0.101044	308
0.19953	0.0426738	306
0.20161	0.0523269	308
0.106679	0.0772529	308
0.180112	-0.173918	308
0.135146	0.0158722	284
0.158909	0.0148941	276
0.0909874	-0.0200103	284
0.0108197	-0.0869603	276
0.0509606	0.121601	300
0.0924812	0.124005	780
0.112025	0.242219	778
0.0726312	0.12959	766
0.201648	0.143319	758
0.211524	0.217775	774
0.203111	0.123712	1266
0.251048	-0.15287	1260
0.208536	-0.200858	1254

## Sheet: Sheet2
0.229137	-0.218806	-172
