# Supplementary material for: Spinal premotor interneurons controlling antagonistic muscles are spatially intermingled
Source: eLife. 2022 Dec 13;11:e81976. doi: 10.7554/eLife.81976 (PMC9844990; doi:10.7554/eLife.81976)
Supplement: Figure 12—figure supplement 8—source data 3. [file elife-81976-fig12-figsupp8-data3.xlsx]

## Sheet: Sheet1
0.198179	-0.0737256	-4564
-0.121073	-0.184516	-4576
0.090624	0.00562232	-3616
0.225761	0.0703575	-2648
0.165907	0.0319988	-2656
0.0680323	-0.00784843	-2656
0.342394	-0.213608	-2652
0.0343166	-6.06391e-05	-2150
0.205923	0.0488266	-2162
0.0412798	0.0118428	-2164
0.213107	0.0766162	-2166
0.0895232	0.0400791	-2174
0.256149	0.112567	-1222
0.349038	-0.00702854	-1216
-0.119057	-0.144481	-1208
0.143135	0.188439	-1208
0.140849	0.12193	-1198
0.263216	-0.202253	-1198
0.101531	-0.0209694	-1194
0.126394	0.0774894	-1214
0.282723	0.0720895	-716
-0.113663	-0.110333	-718
0.15311	-0.0381822	-718
0.220111	0.231275	-724
0.186932	0.145983	-728
0.287487	0.141767	-730
-0.129303	-0.14045	-736
0.0789066	0.107622	-742
0.264866	-0.0897517	-738
0.217287	0.100065	-736
0.228863	0.108898	-734
-0.0306437	-0.083694	-740
0.0517888	0.084746	-714
0.106141	0.114073	-714
0.276548	-0.148423	-708
0.243448	0.106356	-258
0.082651	0.0612081	-254
0.280833	0.030601	-250
0.0992625	0.0427821	-250
0.125481	0.0419228	-244
0.135712	0.160127	-238
0.141664	-0.00546425	-240
0.0909658	0.0182021	-232
0.107125	0.0454204	-234
0.117609	0.0565486	-238
0.251112	0.0545759	-262
0.19712	0.126809	-260
0.284213	-0.189391	216
0.340125	-0.205427	216
0.253177	-0.107869	228
0.174353	0.165011	250
0.259113	0.104057	250
0.216456	0.0955733	236
0.205202	0.0205688	238
0.231658	0.0220484	234
0.0646246	0.0615912	228
-0.00266784	-0.0752228	252
0.214093	0.0623916	228
0.244845	-0.22471	238
0.204711	-0.258753	218
0.324926	0.00192832	732
0.31051	-0.235122	736
0.0878903	0.12778	736
0.330756	-0.0235784	736
0.14789	0.0103054	740
0.227362	0.00638267	708

## Sheet: Sheet2
0.326544	-0.131284	-254
0.372564	-0.0620074	224
