# Supplementary material for: Spinal premotor interneurons controlling antagonistic muscles are spatially intermingled
Source: eLife. 2022 Dec 13;11:e81976. doi: 10.7554/eLife.81976 (PMC9844990; doi:10.7554/eLife.81976)
Supplement: Figure 12—figure supplement 8—source data 4. [file elife-81976-fig12-figsupp8-data4.xlsx]

## Sheet: Sheet1
0.266188	-0.00909223	-3522
0.0929627	0.112241	-3030
0.168568	-0.0167158	-3034
-0.145628	-0.103909	-2568
0.127557	0.0474875	-2562
0.217197	-0.0192519	-2558
0.125528	0.0612684	-2070
0.211545	0.112871	-2084
0.250693	0.182338	-2088
0.0537038	0.289189	-2098
0.114603	0.19146	-1588
0.261817	-0.0836408	-1590
-0.117095	-0.126435	-1132
-0.0758526	-0.0543051	-1140
0.0920069	0.301123	-1114
0.262883	0.179804	-1118
0.233307	0.129288	-1118
0.146119	0.0932262	-1126
0.239051	0.112094	-1126
0.177981	0.161163	-1130
0.210148	0.149156	-1134
0.217274	0.224756	-1138
0.112576	0.203121	-1128
0.113101	-0.00408725	-1114
0.225776	0.00979947	-1122
0.141705	0.0487348	-1122
0.260397	-0.00493167	-1134
0.27797	-0.0691782	-1142
0.23182	-0.0998822	-1142
0.255573	-0.198359	-1128
0.157866	0.186115	-640
0.135501	0.154176	-638
-0.152005	-0.0921282	-638
0.0586895	-0.0123828	-640
-0.11091	-0.17269	-158
0.19034	0.104797	-152
0.12887	0.132841	-162
0.193541	0.0965186	-162
0.0896494	0.0929534	-160
0.125421	0.0520534	-156
0.172706	-0.0659854	-154
0.285488	-0.109232	-156
0.300505	0.046928	-172
0.0316211	-0.00156456	310
-0.118763	0.0659732	312
0.201735	0.102999	330
0.220733	0.110681	330
0.262321	0.151614	318
0.103941	0.174351	316
0.240361	0.15015	314
0.103606	0.244595	308
0.228983	0.18265	314
0.21575	0.174351	306
0.163272	0.126924	304
0.267482	0.148398	302
0.13001	0.0360654	308
-0.196357	0.25693	782
0.158638	0.228803	780
0.14981	0.214093	810
0.174304	0.235438	810
0.0554419	0.0686542	804
-0.0555217	-0.0825891	1272
-0.282281	0.0148897	1268
-0.199316	-0.152818	1260
-0.0956272	-0.0467278	1258
0.243251	-0.0985371	1266
0.347484	0.000217473	1260
0.324353	0.0366769	1742
