# Supplementary material for: Spinal premotor interneurons controlling antagonistic muscles are spatially intermingled
Source: eLife. 2022 Dec 13;11:e81976. doi: 10.7554/eLife.81976 (PMC9844990; doi:10.7554/eLife.81976)
Supplement: Figure 12—figure supplement 8—source data 5. [file elife-81976-fig12-figsupp8-data5.xlsx]

## Sheet: Sheet1
0.273397	-0.0105992	-4022
0.179796	-0.00442184	-3532
0.102933	0.117681	-3530
0.130087	0.0520314	-3064
0.218815	-0.0120224	-3060
-0.140826	-0.109724	-3068
0.112437	0.181074	-2572
0.243356	-0.080381	-2572
0.124546	0.0567687	-2088
0.0512037	0.287967	-2116
0.244881	0.171744	-2106
0.208131	0.104001	-2104
0.171357	0.150763	-1622
0.229862	-0.021411	-1626
0.296496	0.18143	-1606
0.160431	0.183498	-1604
-0.0500234	-0.112362	-1146
-0.290208	-0.0774644	-1128
0.202481	0.150464	-1148
0.208271	0.125176	-1152
0.262353	-0.0552994	-1150
0.153642	-0.0125872	-1130
0.106336	0.217573	-1140
-0.0873116	0.206941	-652
0.113033	-0.0561489	-656
-0.0857412	-0.150474	-680
0.0465311	0.0261228	-680
0.10073	0.201339	-658
0.150136	0.128336	-662
0.208873	0.175649	-648
0.293927	-0.0862812	-648
0.223781	0.15935	-654
0.186958	0.153332	-654
0.197783	0.0743671	-666
0.177417	0.133848	-676
0.128769	0.233358	-672
-0.144796	-0.155838	-200
0.19719	0.214236	-168
0.20055	0.137731	-172
0.219213	0.0753138	-172
0.0809319	0.138239	-174
0.0757674	0.205422	-184
0.314464	0.0324214	-180
0.181682	0.091461	-190
0.186106	0.0964674	-196
0.191836	0.163566	-198
0.232132	0.121866	-200
0.240241	0.175532	-202
0.120033	0.150846	-196
0.263754	0.221302	-204
0.0943356	0.0840784	-200
0.119068	0.0330842	-194
0.1513	0.0141235	-168
0.151715	0.0112608	-178
0.129417	-0.0108447	-176
0.139581	-0.0806868	-174
0.20222	-0.239021	-192
0.10181	-0.0991045	-196
0.233107	-0.0329291	-200
0.30166	-0.297222	-202
-0.141517	-0.193257	310
-0.0942239	-0.065748	310
0.140034	-0.010958	308
0.105785	0.107916	306
0.150003	0.0567324	304
0.145864	0.0510885	288
-0.0795348	-0.08773	282
-0.111309	-0.230118	280
0.153976	0.113545	276
0.193318	0.129488	306
0.244575	0.155758	304
0.1835	0.0243128	304
0.0864748	0.150018	290
0.247977	0.0330426	278
0.183386	0.0857583	278
0.232339	0.171216	278
0.343446	-0.165689	312
0.299467	-0.0330572	306
0.182104	-0.0148061	284
0.177208	-0.164304	276
-0.258164	0.135395	794
-0.195266	-0.149233	778
0.211402	0.0631325	780
0.248227	-0.0571178	780
0.103348	0.212035	768
0.237396	0.115133	772
0.278638	-0.0408323	792
-0.250972	-0.00186896	1744
0.147426	0.0611001	1740

## Sheet: Sheet2
0.279137	-0.218806	-172
0.347455	-0.126111	-178
0.338259	-0.0848127	290
