# Supplementary material for: Spinal premotor interneurons controlling antagonistic muscles are spatially intermingled
Source: eLife. 2022 Dec 13;11:e81976. doi: 10.7554/eLife.81976 (PMC9844990; doi:10.7554/eLife.81976)
Supplement: Figure 12—figure supplement 8—source data 6. [file elife-81976-fig12-figsupp8-data6.xlsx]

## Sheet: Sheet1
0.131321	0.0450537	-4099
0.274313	-0.20988	-2624
0.316069	-0.0400983	-2644
0.211033	0.0280308	-2644
0.306589	0.0345981	-2662
0.0246485	0.0119458	-2172
0.258975	0.0663713	-2150
0.244358	0.0758318	-2158
0.218777	0.0536858	-2146
-0.0759441	-0.125264	-2164
-0.073415	-0.154726	-2168
0.051473	0.0115232	-1688
0.111564	0.0220917	-1708
-0.0819736	0.0353854	-1686
-0.0979037	-0.130985	-1714
0.262115	0.0773402	-1188
0.217343	0.0316543	-1198
0.18103	0.0589679	-1204
0.20251	-0.0173264	-1204
0.144024	0.0582727	-1212
0.113107	0.0654003	-1216
0.221431	0.0714096	-1216
0.246907	-0.0369502	-1218
0.196517	-0.218539	-1190
0.363362	-0.151966	-1206
0.229931	0.00394539	-714
0.067133	0.0761183	-712
0.256557	0.106949	-720
0.232959	0.111324	-722
0.219642	0.0697705	-724
0.250226	0.0820727	-724
0.191453	0.0773588	-728
0.194964	0.0302561	-730
0.101856	0.137	-730
0.295266	-0.00801181	-736
0.00520127	-0.0429394	-734
-0.11169	-0.100166	-716
0.328986	-0.0472055	-716
0.276973	-0.212131	-718
0.194806	-0.206413	-716
0.171009	-0.118828	-736
0.225087	-0.0427155	-740
0.0771315	0.0136196	-228
0.12475	0.0216118	-232
0.177497	0.0605906	-236
0.175851	0.0150991	-238
-0.0923849	-0.0546722	-242
0.186476	0.0297132	-244
0.0586277	-0.00318962	-258
0.284247	-0.150785	-264
0.273937	-0.0474198	-262
0.249646	0.0220976	252
0.169469	0.0766646	246
0.250134	-0.0156847	218
0.179126	0.0715814	218
0.205961	-0.0637119	240
0.0355722	0.0911409	746
0.283837	0.0172944	738
0.119517	0.103028	736
0.229726	-0.0241855	732
0.104858	0.212105	730
0.191784	-0.185134	742
0.403184	-0.111766	708
0.362576	-0.0173674	1204
-0.264848	-0.0692939	1206
-0.212471	-0.0580369	1176

## Sheet: Sheet2
0.346139	-0.133164	-252
0.370011	-0.242801	220
