# Supplementary material for: Spinal premotor interneurons controlling antagonistic muscles are spatially intermingled
Source: eLife. 2022 Dec 13;11:e81976. doi: 10.7554/eLife.81976 (PMC9844990; doi:10.7554/eLife.81976)
Supplement: Figure 12—figure supplement 9—source data 1. — The x-y coordinates are normalized (between –0.5 and 0.5) and scaled to an idealized spinal cord of dimensions 1700 μm and 900 μm in the mediolateral and dorsoventral directions respectively, while z coordinates are in micron, with the axis origin taken at the border between L4 and L5 and negative values in the rostral direction. [file elife-81976-fig12-figsupp9-data1.xlsx]

## Sheet: Sheet1
-0.0083567	-0.0914794	-5030
-0.218731	-0.0647407	-4066
-0.236018	0.02683	-3592
0.236004	0.111911	-3570
0.148793	0.0850568	-3574
0.172159	0.141555	-3576
0.177166	0.0133416	-3588
0.31074	-0.0875359	-3576
0.265912	-0.0121836	-3584
0.307574	-0.0179247	-3590
0.312914	0.00525998	-3594
0.322202	-0.0171826	-3596
0.250522	0.079721	-3084
0.259518	0.0153007	-3086
0.177134	-0.0633864	-3096
0.270062	-0.0293514	-3108
0.172625	-0.136155	-3122
0.218472	0.00507708	-3122
0.181581	0.0131402	-3124
-0.189049	-0.0431629	-3088
-0.234767	0.0324686	-3088
-0.105437	0.0133023	-3120
-0.162342	-0.103579	-2610
-0.169422	-0.0358891	-2628
-0.287079	0.0136925	-2622
0.1685	0.0627341	-2610
0.0473773	0.0331615	-2642
0.158082	0.152484	-2632
0.170234	0.160653	-2610
0.249204	0.129836	-2618
0.32161	-0.0258743	-2634
0.282033	0.0222649	-2614
0.208182	-0.18287	-2628
0.286839	-0.118673	-2640
0.239032	-0.121257	-2642
0.180953	0.167001	-2130
0.242281	0.159646	-2134
0.195665	0.112378	-2140
0.0868324	0.19009	-2154
0.115531	0.196448	-2154
0.172746	0.170376	-2158
0.167189	0.135312	-2140
0.358707	0.0946239	-2130
0.29153	-0.0802508	-2132
0.29776	0.00400075	-2138
0.194472	-0.0559634	-2142
0.193226	-0.0446818	-2148
0.213419	-0.0569872	-2162
0.113723	0.0700199	-2158
0.196771	-0.218661	-2128
0.109237	-0.12863	-2152
0.0163966	0.0644364	-2140
0.00403627	-0.0536465	-2144
-0.277719	-0.112459	-2132
-0.197258	0.321181	-1648
-0.227258	0.00765126	-1654
-0.139055	0.0813615	-1658
-0.117802	-0.0372042	-1662
-0.0530531	-0.0425314	-1664
-0.0494713	0.0374338	-1664
-0.231441	0.0738059	-1666
0.179375	0.229251	-1646
0.181515	0.125347	-1646
0.199656	0.1413	-1646
0.215055	0.19284	-1654
0.250761	0.193902	-1660
0.193413	0.146091	-1666
0.184343	0.169934	-1670
0.230956	0.196982	-1670
0.203602	-0.0757187	-1648
0.194713	-0.0438895	-1646
0.185784	-0.0842403	-1656
0.207604	0.0322118	-1654
0.301153	0.0317527	-1658
0.320474	-0.0448746	-1660
0.284388	-0.0635628	-1670
0.162488	0.0142313	-1658
0.127298	-0.0325752	-1646
0.315298	-0.0602154	-1672
0.256169	-0.162101	-1646
0.335605	-0.15818	-1658
0.336146	-0.0918533	-1672
-0.223191	0.183825	-1168
-0.0223633	0.0809352	-1182
-0.104854	-0.166562	-1186
-0.136622	-0.152159	-1186
-0.0862363	-0.100169	-1178
-0.0969279	-0.102373	-1174
-0.122277	-0.155782	-1172
-0.153618	-0.219928	-1170
0.0879549	0.0179824	-1174
0.0132312	0.00775453	-1170
0.305513	-0.0865001	-1170
0.307047	-0.118624	-1170
0.28118	-0.10553	-1172
0.256108	-0.221055	-1174
0.362665	-0.0716603	-1180
0.350573	-0.129376	-1180
0.293277	-0.235589	-1184
0.208	-0.244413	-1188
0.234586	-0.191041	-1210
0.246868	-0.112361	-1208
0.220729	-0.0643422	-1168
0.311377	0.00139669	-1176
0.351594	-0.0377615	-1176
0.28059	0.0376306	-1186
0.126504	0.0426354	-1186
0.202485	0.0581808	-1206
0.301142	-0.00915122	-1210
0.192445	0.105581	-1212
0.182872	0.107981	-1212
0.169389	0.137428	-1210
0.0909818	0.0693543	-1204
0.153054	0.145845	-1192
0.164808	0.112404	-1188
0.19935	0.124313	-1180
0.0983131	0.144419	-1176
0.151592	0.161572	-1176
0.226413	0.154516	-1172
0.208046	0.100605	-1200
-0.00497132	-0.05095	-1194
0.324049	-0.00765996	-1194
-0.171491	0.164518	-702
-0.154691	-0.0939052	-692
-0.260424	-0.116254	-694
-0.0124865	-0.0304603	-714
0.211609	0.124449	-686
0.0602091	0.118387	-688
0.15262	0.14835	-694
0.237269	0.0905976	-696
0.125359	0.0817588	-698
0.162735	0.126722	-702
0.0916997	0.120149	-704
0.160309	0.162455	-706
0.12364	0.186041	-706
0.163975	0.112806	-710
0.24141	0.139819	-714
0.160042	0.187419	-716
0.261585	0.151224	-720
0.158278	-0.123785	-690
0.120072	-0.0237752	-690
0.21321	-0.076752	-694
0.229788	-0.16365	-692
0.25866	-0.0954575	-690
0.28511	-0.126149	-690
0.234368	-0.202362	-692
0.319882	-0.0358446	-692
0.240767	-0.26422	-684
0.233252	-0.26315	-682
0.285975	-0.285184	-694
0.321211	-0.298589	-692
0.381203	-0.22783	-714
0.237442	-0.218375	-720
0.240001	0.0494595	-692
0.277837	0.116603	-698
0.211683	0.0766262	-714
0.157079	-0.135235	-210
0.189348	-0.0864752	-214
0.204475	-0.253596	-216
0.221877	-0.285189	-218
0.231073	-0.26076	-224
0.216721	-0.157482	-226
0.252642	-0.160921	-228
0.195922	-0.115664	-238
0.221275	-0.159845	-236
0.267632	-0.0733557	-222
0.35849	-0.14495	-236
0.376531	-0.0949885	-242
0.21564	-0.0682393	-210
0.186344	-0.0165723	-210
0.18018	0.1202	-212
0.165778	0.0189348	-216
0.0894949	0.0769763	-218
0.166785	0.00889774	-226
0.08846	0.139016	-222
0.143434	0.0943105	-220
0.100127	0.123625	-228
0.132232	0.152457	-228
0.0945327	0.0938352	-230
0.0811108	0.0970923	-234
0.221978	0.0433774	-236
0.209417	-0.0156707	-234
0.160001	-0.0148179	-236
0.142973	0.052338	-240
0.126629	0.119494	-234
0.157872	0.147536	-234
0.156313	0.169525	-214
0.256627	0.14906	-216
0.25194	0.13132	-220
0.260256	0.144216	-222
0.199228	0.175592	-240
0.0936528	0.178109	-242
0.0970585	0.129866	-242
-0.256622	0.219312	-206
-0.133217	0.163423	-234
-0.161041	-0.111589	-218
-0.14673	-0.0583281	-230
-0.0779376	-0.0346474	-230
-0.117707	-0.052899	268
-0.0433848	-0.110546	262
-0.148733	-0.0220792	266
-0.109329	-0.0298297	262
-0.055139	-0.0398989	250
-0.120056	-0.0935078	242
-0.0652079	-0.0158137	236
-0.155944	0.119723	268
-0.213316	0.204868	242
0.224561	0.141509	272
0.233536	0.141678	270
0.274063	0.188488	266
0.200743	0.15107	264
0.246695	0.175116	256
0.161426	0.147547	248
0.227094	0.170824	246
0.159087	0.220486	248
0.101265	0.156821	242
0.100684	0.143749	242
0.251945	0.153903	246
0.323715	-0.0320051	270
0.184552	0.0997603	268
0.245493	0.127936	266
0.155082	0.115639	262
0.201653	0.135133	260
0.299354	0.100444	254
0.194563	0.135966	256
0.32895	-0.0147325	238
0.19558	0.108872	246
0.176668	0.117626	244
0.400299	0.0130261	240
0.301146	0.057165	242
0.10898	0.0958134	268
0.0559866	0.0975524	242
0.115707	0.105049	236
0.132421	0.117678	236
0.231347	-0.234489	270
0.206085	-0.205545	264
0.2973	-0.265478	260
0.248646	-0.10714	256
0.201019	-0.215211	238
0.244607	-0.242103	238
0.300904	-0.225397	238
0.27201	-0.19134	236
0.19094	-0.148341	242
0.246898	-0.186827	240
0.288404	-0.0818429	254
0.189333	0.0947127	262
0.190713	0.112812	258
0.222295	0.15828	248
-0.296515	-0.0799986	754
-0.0133215	-0.0240949	746
-0.176865	-0.064277	718
0.268166	0.0981361	746
0.171509	0.0991899	744
0.217537	0.0971683	742
0.131842	0.0814037	734
0.192761	0.122991	726
0.180254	0.12246	718
0.145491	0.125866	720
0.220527	0.0795756	718
0.242011	-0.0469281	746
0.334447	-0.129185	742
0.279021	-0.0746935	736
0.120072	-0.0585633	730
0.292467	-0.05766	720
0.218685	0.0379239	714
0.355294	-0.134325	720
0.315567	0.0397806	752
0.333258	-0.0961718	732
0.271757	-0.245903	744
0.327742	-0.145243	730
-0.21063	0.227544	1202
-0.234438	-0.183196	1224
-0.060228	0.0550009	1196
0.134584	0.0489415	1206
0.185057	0.159545	1210
0.184227	0.134901	1214
0.119389	0.0682249	1234
0.327	-0.0486032	1230
0.338901	0.0127729	1226
0.332595	-0.0978529	1222
0.347247	-0.0600755	1218
0.275848	-0.0432279	1202
0.345045	-0.180775	1224
0.253081	-0.275598	1220
0.361374	-0.162371	1206
0.166114	0.14564	1710
0.236492	0.0525264	-5042
0.239031	0.072825	-5040
-0.0688068	-0.0741898	-5038
-0.0744639	-0.00552477	-5030
-0.0868037	-0.0395366	-5020
-0.0834066	-0.0678511	-5044
-0.19692	-0.0940609	-5046
0.204657	0.137055	-4552
0.247102	0.145839	-4564
0.167986	0.0759142	-4566
0.129972	0.142896	-4542
-0.00610674	-0.0572384	-4534
-0.0972733	-0.20237	-4530
0.129332	0.277454	-4072
0.247986	0.164833	-4074
0.185809	0.179675	-4078
0.0416714	0.0319152	-4076
0.166842	0.0400745	-4056
0.00772165	0.139969	-4060
-0.0610287	-0.0341867	-4060
-0.0886238	-0.0954299	-3568
0.0161159	0.146146	-3568
0.215159	0.11492	-3574
0.143365	0.109864	-3578
0.164875	0.0794135	-3596
0.270546	0.00406935	-3574
0.267475	0.0343163	-3584
0.237931	0.177358	-3090
0.195965	0.212759	-3098
0.217443	0.163423	-3116
0.0592969	0.0275304	-3088
0.130502	-0.0816037	-3090
0.1913	-0.0494514	-3120
0.0503894	0.0143593	-3124
-0.265363	-0.0371445	-3122
-0.262198	0.248461	-3122
-0.132328	-0.0359438	-2610
-0.165237	-8.20322e-05	-2614
-0.170732	-0.129385	-2624
-0.118523	-0.0890255	-2632
-0.0538004	-0.0419731	-2644
0.0710475	0.02422	-2612
0.169969	0.0397173	-2618
0.249849	-0.00182522	-2642
0.27875	0.227687	-2642
0.253101	0.156599	-2624
0.135457	0.0947404	-2618
0.281406	0.19633	-2612
0.10371	0.102267	-2610
0.207352	0.172138	-2610
0.32244	0.01776	-2610
0.375386	-0.148137	-2620
0.195496	0.0994464	-2138
0.210863	0.106855	-2140
0.188154	0.233155	-2146
0.108353	0.171723	-2158
0.179263	0.106404	-2158
0.0878385	0.107623	-2160
0.149301	0.162711	-2160
0.210266	0.0284767	-2134
0.201597	0.0671372	-2136
0.303832	0.0761962	-2138
0.317882	0.115045	-2142
0.219333	-0.00285576	-2134
0.171284	0.0159155	-2144
0.198497	0.0211824	-2148
0.238696	0.0572364	-2150
0.184001	-0.0327941	-2152
0.331582	0.0330702	-2160
0.129716	0.0568727	-2160
0.138836	-0.137952	-2130
0.252723	-0.209878	-2154
-0.0841884	-0.0865281	-2130
-0.0968295	-0.0941592	-2138
0.0500263	0.012925	-2160
0.065253	0.0161983	-2160
-0.118233	-0.115315	-2158
-0.1042	0.0620117	-2156
-0.113975	0.194454	-2138
-0.335806	0.153362	-2158
-0.299163	0.258466	-2156
-0.130488	-0.219045	-2148
-0.137023	-0.117167	-2148
-0.137374	-0.129135	-2134
-0.11332	0.23673	-1630
-0.117205	0.090084	-1660
-0.255056	0.16695	-1662
-0.0665756	0.0146808	-1668
0.180751	0.274412	-1648
0.264608	0.257034	-1652
0.186452	0.310125	-1652
0.261087	0.189875	-1670
0.231274	0.077555	-1650
0.192498	0.0746189	-1650
0.201057	0.0353488	-1660
0.289872	-0.012682	-1662
0.310821	0.0417854	-1668
0.14682	0.0604927	-1670
0.196444	0.0453433	-1672
0.195907	-0.0689761	-1662
0.233237	0.0604354	-1662
0.199934	-0.0180761	-1660
0.189103	0.0650261	-1662
0.277746	0.105157	-1658
0.184095	0.0532623	-1648
0.123984	0.101647	-1646
0.232807	0.0932306	-1668
0.233374	-0.12506	-1652
0.27467	-0.13098	-1668
0.339475	-0.121148	-1668
0.300875	-0.13011	-1666
0.0717054	0.253993	-1646
0.0793798	0.191147	-1658
0.0389943	0.0301651	-1648
0.0712349	0.0564758	-1650
0.00715334	-0.0555959	-1652
0.0520767	0.0436887	-1656
0.0764759	0.0202758	-1672
-0.174463	0.0949239	-1190
-0.0943217	0.0998705	-1194
-0.117249	-0.147358	-1204
-0.160657	-0.205415	-1196
-0.0774993	-0.128568	-1188
-0.117701	-0.316204	-1188
-0.124817	-0.206499	-1170
-0.230533	-0.0874822	-1170
0.0522374	0.0153781	-1194
0.00343734	-0.0447231	-1200
0.095512	-0.00239328	-1212
0.214239	-0.0902246	-1190
0.1954	-0.0997687	-1204
0.34968	0.0432755	-1184
0.162361	0.0413187	-1188
0.201695	-0.0100605	-1210
0.0842867	0.180115	-1208
0.177167	0.177721	-1210
0.303928	0.150057	-1206
0.0344555	0.0649387	-1204
0.0827271	0.188517	-1194
0.0712351	0.144754	-1194
0.195416	0.212435	-1196
0.226706	0.207052	-1192
0.0887553	0.113255	-1186
0.117331	0.117642	-1184
0.217117	0.140047	-1186
0.118465	0.0801714	-1178
0.159965	0.0706928	-1178
0.114048	0.125084	-1172
0.110057	0.0718567	-1172
0.351656	0.0172695	-1198
-0.0860321	-0.104233	-686
-0.214228	-0.149176	-696
-0.0880135	-0.196796	-694
-0.103282	-0.136491	-698
-0.0727352	-0.162406	-716
-0.0832304	-0.151273	-718
0.224372	0.0664518	-684
0.280954	0.175594	-686
0.231502	0.222424	-688
0.141755	0.22148	-690
0.191992	0.128204	-692
0.222865	0.137561	-690
0.30994	0.0759758	-690
0.142239	0.0379215	-690
0.155921	0.0472078	-690
0.0939628	0.0616687	-692
0.115403	0.0948562	-694
0.0323009	0.0868705	-692
0.2178	0.147106	-696
0.306382	0.108884	-696
0.293273	0.054732	-698
0.287941	0.090192	-702
0.248313	0.0427325	-694
0.205111	0.183622	-694
0.175251	0.0968491	-698
0.211604	0.218278	-700
0.217865	0.187545	-706
0.0721126	0.12896	-704
0.098573	0.176601	-708
0.101548	0.186985	-706
0.0491654	0.10401	-706
0.319733	0.103324	-712
0.236246	0.230249	-720
0.180262	0.142903	-722
0.229887	0.151357	-722
0.24643	0.0920451	-722
0.104853	0.181251	-720
0.0784127	0.167413	-722
0.0807153	0.145581	-718
0.164084	0.0338168	-720
0.270301	0.0266213	-722
0.1009	0.0953736	-722
0.157739	-0.0721228	-686
0.0487504	-0.0208453	-694
0.168516	-0.0833741	-702
0.228068	-0.0869963	-700
0.219515	-0.123589	-708
0.15896	0.01537	-710
0.183785	0.00605569	-704
0.200101	-0.0328098	-716
0.0823064	0.0104821	-720
0.123195	0.0122512	-720
0.136734	-0.120282	-716
0.237793	-0.119575	-716
0.395972	-0.169657	-710
0.332314	-0.307777	-708
0.214727	0.0672629	-702
-0.204749	0.192549	-212
-0.305144	0.142588	-238
-0.131553	-0.198644	-212
-0.125671	-0.0957294	-214
-0.0757447	-0.0636192	-214
-0.166968	-0.104844	-220
-0.116225	-0.156385	-220
-0.0807643	-0.107821	-222
-0.0928094	-0.162431	-226
0.00101212	-0.0670651	-226
0.00191938	-0.0547424	-228
0.00772766	-0.0421752	-242
-0.101002	-0.0897253	-236
-0.112008	-0.0856294	-210
0.289493	-0.173405	-208
0.347371	-0.282218	-210
0.120387	-0.204075	-230
0.0762873	-0.130915	-230
0.230312	-0.123177	-226
0.207972	-0.0886349	-224
0.208264	-0.121863	-236
0.365817	-0.24618	-240
0.350156	-0.00494863	-240
0.192198	-0.0152932	-210
0.204617	-0.00798211	-212
0.10671	0.0765989	-212
0.121427	0.106857	-216
0.0731962	-0.0258685	-216
0.136973	0.000908646	-220
0.136508	0.0180681	-222
0.196023	-0.00290767	-224
0.215973	-0.00990424	-220
0.143744	0.0209268	-230
0.10961	0.00399105	-230
0.121751	0.0371706	-230
0.0512077	-0.00671699	-226
0.00260324	0.036891	-226
0.0353466	0.04697	-222
0.0600159	0.127057	-222
0.16942	0.152736	-216
0.168978	-0.00669602	-216
0.149871	0.0562522	-212
0.0997164	0.100398	-232
0.111224	0.0897672	-234
0.208752	0.0561334	-236
0.183572	0.0404627	-238
0.231109	0.0467533	-236
0.108502	-0.0224016	-240
0.0807643	0.0329489	-242
0.162253	0.0519536	-242
0.130522	0.0336828	-238
0.116954	0.108206	-236
0.223683	0.21428	-210
0.279459	0.199699	-212
0.286402	0.195841	-214
0.37307	0.210771	-210
0.174531	0.169148	-214
0.277881	0.109059	-216
0.363943	0.085895	-218
0.215773	0.229566	-232
0.266433	0.221877	-236
0.287145	0.104173	-242
0.286657	0.167401	-242
0.220865	0.154372	-242
0.185578	0.150542	-244
0.068742	0.192046	-222
0.141364	0.179849	-240
0.107481	0.165262	-240
0.129683	0.282386	-208
0.151672	0.324317	-244
0.301629	0.11804	-238
-0.175917	-0.164539	270
-0.0685012	-0.121462	268
-0.081786	-0.147937	266
-0.105401	-0.0897172	258
-0.00659634	0.0483268	250
-0.0547661	-0.134905	250
-0.0526061	-0.0954682	250
-0.122105	-0.137894	242
-0.170914	-0.15559	244
-0.251068	0.0283187	242
-0.0497438	-0.126829	242
-0.103047	-0.137132	238
0.254308	0.171528	270
0.186243	0.171332	270
0.0994828	0.204464	270
0.261912	0.239999	268
0.220309	0.222166	266
0.132644	0.165477	262
0.0913027	0.19459	264
0.261088	0.192252	258
0.153823	0.209564	256
0.0886245	0.210847	258
0.105435	0.164585	256
0.0538798	0.151611	254
0.245493	0.255507	250
0.230611	0.155968	248
0.261515	0.21213	240
0.261156	0.18271	250
0.119233	0.208567	250
0.270629	0.0920228	272
0.293591	0.144694	270
0.172507	0.0332621	268
0.357375	0.176061	262
0.242069	0.0385703	262
0.215001	0.105453	258
0.277952	0.0900754	258
0.275981	0.0569891	256
0.17072	0.0762678	256
0.15392	0.0271985	234
0.177491	-0.013254	242
0.134692	0.0502026	244
0.237076	0.113614	248
0.288355	0.108677	250
0.296559	0.0387982	252
0.137375	0.088636	252
0.144514	0.0480793	250
0.188291	0.0719366	240
0.304609	0.0978585	244
0.316625	0.10953	242
0.23062	0.123422	240
0.309936	0.110943	238
0.241236	0.0480467	238
0.0774126	0.080651	270
0.0742404	0.0585458	262
0.104461	0.128515	262
0.0595172	0.00907267	246
0.109808	0.0408042	236
0.116279	0.0968099	236
0.081384	-0.00411624	234
0.102243	0.0929021	260
0.162569	-0.155525	258
0.279328	-0.2394	246
0.192665	-0.164305	242
0.158225	0.152803	258
-0.18234	-0.110832	750
-0.118556	-0.132131	746
-0.0978755	-0.164392	740
-0.130231	-0.120417	738
-0.125993	-0.0693741	734
-0.0704477	-0.0994121	728
-0.155251	-0.0417736	726
-0.148011	-0.117442	718
-0.161041	-0.117499	718
-0.170279	-0.124561	722
-0.105437	-0.173568	734
-0.235371	0.237608	734
-0.200049	0.133164	754
0.0917943	0.205599	754
0.114098	0.127056	750
0.206701	0.12046	750
0.26923	0.0835329	752
0.16091	0.173174	742
0.165137	0.095376	736
0.264249	0.122683	732
0.12349	0.0712954	726
0.136092	0.0746577	726
0.155887	0.198996	722
0.192452	0.0388056	748
0.240495	-0.0340311	748
0.220117	0.0260449	750
0.200013	0.024862	748
0.270467	0.0140153	748
0.247378	0.025543	746
0.206962	-0.0045523	742
0.238111	0.0144025	734
0.308618	-0.0172055	734
0.242706	-0.0601764	728
0.263066	0.0210624	724
0.205565	-0.116539	720
0.182269	0.00831601	716
0.214155	-0.00161302	716
0.227102	-0.0315722	716
0.230508	-0.0996344	716
0.336296	-0.0579181	720
0.335909	0.0348771	744
0.377937	-0.0106889	720
0.266312	-0.163531	734
-0.144944	0.206757	1226
-0.257098	-0.190827	1234
-0.26497	-0.15438	1232
-0.113208	-0.125714	1230
-0.126831	0.00139833	1232
-0.194038	-0.1532	1226
-0.187895	-0.201743	1216
-0.202309	-0.139705	1218
-0.178925	-0.154613	1212
-0.0655111	-0.119196	1202
-0.0803623	-0.142742	1196
-0.13192	-0.0690894	1198
0.186079	0.148975	1200
0.19309	0.0537379	1208
0.249644	0.0158703	1210
0.0943589	0.276929	1206
0.167791	0.138818	1206
0.354532	0.0376271	1206
0.307203	0.0664507	1204
0.323907	0.0442804	1202
0.0402685	0.0311917	1214
0.0330643	0.0320563	1214
0.152235	0.0919513	1228
0.198835	0.202968	1232
0.354962	-0.0618798	1230
0.304097	-0.0344921	1226
0.298371	-0.0108258	1222
0.382376	0.0178926	1210
0.255857	-0.222906	1210
0.359553	0.0526704	1228
0.109387	0.266326	1694
0.298026	-0.00614518	1708
0.294167	0.0127757	1688
0.373812	-0.0530666	1692
-0.192006	-0.0782895	1700
-0.22765	-0.0793946	1706
-0.0602206	-0.0626764	1708
