# Supplementary material for: Spinal premotor interneurons controlling antagonistic muscles are spatially intermingled
Source: eLife. 2022 Dec 13;11:e81976. doi: 10.7554/eLife.81976 (PMC9844990; doi:10.7554/eLife.81976)
Supplement: Figure 12—figure supplement 9—source data 2. [file elife-81976-fig12-figsupp9-data2.xlsx]

## Sheet: Sheet1
0.246869	-0.040879	-3540
0.065602	0.0954841	-3056
0.0166042	0.0379734	-3084
0.231939	-0.107705	-3044
-0.227094	0.0326629	-3062
-0.185032	-0.0230056	-3076
-0.00737563	-0.0341052	-3074
0.188599	0.113065	-2584
0.198851	0.0202248	-2598
-0.165364	-0.0712736	-2576
-0.134182	-0.0292661	-2568
0.297949	0.0643654	-2088
0.136489	0.140292	-2100
0.340896	-0.027864	-2094
0.21017	-0.01403	-2096
0.198129	0.00366033	-2094
0.310235	-0.0770551	-2122
0.0145154	0.0256743	-1634
-0.0320489	-0.0225664	-1632
0.305558	-0.110656	-1638
0.248647	-0.0658723	-1640
0.378808	-0.0936993	-1636
0.197136	-0.0272585	-1632
0.342229	-0.0162293	-1616
0.30227	-0.094897	-1614
0.185988	0.190886	-1634
0.171521	0.141697	-1636
0.291636	0.0720805	-1632
-0.115932	-0.171614	-1150
-0.096908	0.0373634	-1148
-0.0569292	0.0740964	-1162
-0.267468	0.06811	-1158
-0.174405	0.160456	-1158
0.28708	0.0177962	-1130
0.241458	0.151799	-1136
0.234999	0.13481	-1136
0.111355	0.0908228	-1150
0.198112	0.0917792	-1152
0.205118	0.0992816	-1146
0.147372	0.045801	-1146
0.111032	0.15957	-1148
0.145558	0.177884	-1152
0.182058	0.110107	-1168
0.203214	-0.226972	-1128
0.277152	-0.123255	-1140
0.252867	-0.0958386	-1138
0.193588	-0.210791	-1152
0.224524	-0.197097	-1152
0.269753	-0.287976	-1152
0.216659	-0.205889	-1162
0.359576	-0.165118	-1158
0.190618	0.104701	-1142
0.296081	0.00092098	-1146
-0.0782186	-0.0302814	-650
-0.0812679	0.0496061	-652
0.166431	0.104264	-652
0.272156	0.122283	-656
0.187823	0.112298	-658
0.291593	0.0376404	-660
0.297221	0.0204077	-664
0.300857	0.0661266	-670
0.263457	0.166355	-660
0.270956	0.147839	-660
0.143796	0.209544	-660
0.167736	0.15252	-662
0.192785	0.130154	-660
0.15798	0.0639382	-660
0.196522	0.0665198	-664
0.08669	0.100577	-670
0.124544	0.214359	-674
0.258817	0.144449	-676
0.240263	0.104227	-678
0.22888	0.0952582	-674
0.194926	0.0853548	-678
0.255821	-0.0385232	-650
0.263114	-0.0122402	-654
0.26323	-0.120354	-656
0.265957	-0.294788	-656
0.287852	-0.0231154	-670
0.209416	-0.218506	-668
-0.15921	-0.10607	-188
-0.292459	0.156835	-196
0.182384	0.0950988	-172
0.178358	0.0768262	-174
0.121046	0.164321	-176
0.138449	0.0567999	-178
0.195954	0.0943694	-178
0.192545	0.0513992	-206
0.168928	-0.0122456	-204
0.254253	-0.00917316	-200
0.204653	0.0719485	-196
0.215744	0.0813722	-190
0.18606	0.0398756	-196
0.153712	0.156143	-198
0.0937843	0.059865	-202
0.156224	0.171932	-204
0.23509	0.160703	-204
0.129536	0.109481	-192
0.0770753	0.0398683	-184
0.250775	0.109665	-180
0.128607	0.178018	-184
0.228098	0.128491	-188
0.146391	0.170245	-180
0.248713	0.122913	-176
0.0888029	-0.0669899	-178
0.220182	-0.126413	-182
0.188858	-0.218012	-194
0.230349	-0.324678	-180
0.25288	-0.321274	-176
0.269348	-0.331066	-170
0.252906	-0.154603	-182
0.222798	-0.157579	-186
0.261166	-0.226677	-178
0.164239	0.116547	-196
-0.222177	-0.0188522	309.35
-0.178734	0.0440826	275.27
-0.146972	-0.211714	283.79
0.255082	0.149371	300.83
0.259365	0.170995	298.7
0.178392	0.0834152	302.96
0.141335	0.1715	298.7
0.18616	0.147588	294.44
0.0762997	0.119128	283.79
0.246794	0.153287	275.27
0.215005	0.134529	271.01
0.294509	0.0468411	268.88
0.272212	0.0826415	292.31
0.286453	0.0385387	292.31
0.396178	0.0302429	300.83
0.335144	-0.0189127	300.83
0.175768	0.0240799	302.96
0.173855	-0.0912064	296.57
0.300889	-0.0507973	296.57
0.239643	-0.0616363	309.35
0.19208	-0.227679	277.4
0.235003	-0.196737	283.79
0.262249	-0.100854	296.57
0.207432	-0.214647	317.87
0.221819	-0.250743	317.87
0.316469	-0.270437	320
0.237974	-0.0681693	290.18
0.171589	0.152116	311.48
0.166509	0.110476	292.31
0.152973	0.0879028	292.31
-0.0333303	0.0410147	764
-0.149658	0.0143488	770
-0.024307	-0.0404856	772
-0.115457	-0.0317804	782
-0.102526	-0.162366	784
0.24881	0.154846	762
0.184412	0.117478	792
0.146317	0.145209	784
0.150146	0.171339	790
0.121847	0.185688	788
0.304744	0.0518998	758
0.248505	-0.0570213	776
0.246138	-0.0253115	778
0.333218	-0.102431	776
0.220401	-0.13558	792
0.248921	-0.21023	780
0.296429	-0.0600474	1262
0.31708	-0.119421	1258
0.0287759	0.16561	1736
0.357422	0.0275154	1726
0.184365	-0.035322	1756
-0.0836636	-0.082455	-4036
0.255624	0.0869418	-3540
0.233785	0.141115	-3066
-0.275631	0.0360983	-3064
-0.109005	-0.0819522	-3066
-0.121276	-0.0800181	-3084
-0.234722	0.218799	-3074
0.295549	-0.0397332	-2586
0.0781409	0.227	-2572
-0.103569	-0.122149	-2576
0.262808	0.201263	-2104
0.155955	0.309976	-2106
0.300072	0.127375	-2112
0.170365	0.0740532	-2118
0.175551	0.024815	-2088
0.406318	-0.0283813	-2112
0.0444509	0.0295805	-2092
-0.0991527	-0.104304	-1642
-0.0678568	-0.00414639	-1626
0.398496	-0.0751505	-1638
0.235846	-0.0285093	-1614
0.273411	-0.0204287	-1608
0.0299797	0.179113	-1612
0.175831	0.139681	-1612
0.0445808	0.202339	-1620
0.170677	0.217636	-1618
0.0983017	0.184927	-1624
0.119337	0.195502	-1628
0.20016	0.121807	-1638
0.135463	0.0713983	-1636
0.0736911	0.101045	-1638
0.235448	0.0652128	-1616
0.229485	0.092206	-1616
0.279631	0.13793	-1628
0.363901	0.18185	-1632
0.102084	0.072977	-1132
0.0347282	0.0126741	-1132
-0.144566	-0.112289	-1136
-0.090061	-0.121718	-1144
-0.117481	0.0221744	-1160
-0.0294299	0.135972	-1150
0.225887	0.0656092	-1132
0.176054	0.0706675	-1136
0.213455	0.158189	-1140
0.136807	0.194497	-1140
0.110082	0.0668844	-1138
0.194399	0.145536	-1150
0.153864	0.104751	-1154
0.20183	0.128108	-1148
0.254946	0.0689318	-1146
0.0695041	0.0970429	-1152
0.29109	0.0421313	-1154
0.301697	0.0480043	-1152
0.240228	0.141434	-1158
0.248465	0.241049	-1162
0.276606	0.0356986	-1162
0.267812	0.0189864	-1162
0.250353	0.0432719	-1166
0.173418	0.0295564	-1162
0.160573	0.0369384	-1156
0.349303	-0.0396872	-1136
0.169027	0.000850135	-1150
0.0294516	-0.014703	-656
-0.109715	-0.19855	-670
-0.216075	-0.17387	-676
0.187194	0.051112	-648
0.198303	0.145895	-652
0.221767	0.108574	-660
0.219214	0.177045	-664
0.0407238	0.0730553	-660
0.138913	0.0499696	-654
0.195137	0.0549176	-660
0.224055	0.154894	-674
0.258781	0.0763045	-676
0.275792	0.0578181	-674
0.124259	0.062781	-680
0.0947333	0.0526847	-678
0.144092	0.0459118	-672
0.313794	-0.0447694	-646
0.122695	0.00638715	-676
0.204459	-0.0186718	-674
0.263473	-0.00688417	-670
-0.0794093	-0.153947	-178
-0.102812	-0.119907	-196
-0.0326086	-0.0546779	-204
0.0752112	0.0861614	-174
0.0516829	0.132455	-176
0.337657	0.0485257	-172
0.19657	-0.0217356	-202
0.314029	0.078145	-204
0.212434	0.0241965	-196
0.225096	0.150374	-198
0.204455	0.190839	-194
0.231764	0.136566	-192
0.0928235	0.163304	-200
0.0233508	0.0854172	-204
0.11455	0.0935147	-204
0.184744	0.162148	-204
0.234207	0.10078	-198
0.118926	-0.0284036	-198
0.124654	0.027269	-198
0.321637	0.0856678	-192
0.135061	0.0410029	-184
0.136966	0.0197241	-186
0.122952	0.0513255	-188
0.107423	0.0804438	-188
0.0958154	0.142969	-186
0.217906	0.0854172	-186
0.182269	-0.0413934	-184
0.119312	0.253238	-174
0.165246	-0.0764504	-174
0.179815	-0.0883645	-174
0.0610713	-0.193344	-172
0.171241	-0.113637	-202
0.218047	-0.324472	-176
-0.0218843	0.0188118	298.7
-0.243096	0.143632	277.4
-0.161761	-0.192088	279.53
-0.0608771	-0.0918052	268.88
-0.0203881	-0.120312	285.92
-0.00378381	-0.0457983	292.31
-0.12878	-0.209493	296.57
-0.133252	-0.227155	307.22
0.212273	0.167436	309.35
0.175617	0.174359	307.22
0.286421	0.15875	302.96
0.247173	0.182628	302.96
0.0816664	0.135847	309.35
0.23116	0.229678	294.44
0.202879	0.107031	292.31
0.276836	0.23944	292.31
0.339611	0.14931	285.92
0.312224	0.138882	281.66
0.225392	0.157525	285.92
0.203448	0.218139	290.18
0.188941	0.226785	281.66
0.171779	0.21244	281.66
0.277097	0.212582	277.4
0.292004	0.21863	277.4
0.229278	0.200397	273.14
0.311449	0.114008	277.4
0.28145	0.101621	275.27
0.0846316	0.169804	277.4
0.133724	0.0791227	279.53
0.20728	0.0985804	279.53
0.161772	0.0989639	271.01
0.0791836	0.0269999	268.88
0.280967	0.0782547	268.88
0.103057	0.0622485	273.14
0.110284	0.0653704	275.27
0.17334	0.0751329	275.27
0.147395	0.0702214	277.4
0.256811	0.0485635	281.66
0.252198	0.10251	283.79
0.142755	0.0645226	290.18
0.0601073	0.0315616	292.31
0.318973	0.0826953	294.44
0.219488	0.022122	300.83
0.189706	-0.0165983	305.09
0.20998	0.0612797	305.09
0.155472	0.0495055	305.09
0.155895	0.0184081	302.96
0.212446	-0.222741	277.4
0.33387	-0.191623	271.01
0.357679	-0.179553	273.14
0.340088	-0.256267	279.53
0.285743	-0.202785	290.18
0.279601	-0.234784	320
0.278799	-0.225843	320
0.0290562	0.0125681	290.18
0.185824	0.17734	290.18
0.0573253	0.0109627	794
-0.14267	-0.119404	772
-0.108592	-0.134049	772
0.194476	0.0918422	764
0.10436	0.192996	764
0.122738	0.203754	768
0.147142	0.113323	766
0.132483	0.0902126	766
0.161821	0.0738815	770
0.149118	0.101577	772
0.191771	0.126889	772
0.188638	0.0785868	788
0.130318	0.0832357	790
0.23259	0.134705	782
0.145588	0.168517	786
0.232447	0.237679	790
0.211742	0.192933	794
0.200567	-0.0167826	762
0.275087	-0.0360272	760
0.157232	0.0199712	766
0.247725	0.00644779	772
0.206463	-0.00581289	774
0.381117	0.0418401	780
0.215389	0.0433497	788
0.250397	0.0180947	788
0.208602	-0.00957292	786
0.221137	0.19567	1270
0.228679	0.20192	1260
0.339727	0.0566992	1272
0.257949	-0.0751426	1252
0.199745	0.0447678	1256
0.215803	0.0111157	1242
0.245871	-0.0673041	1234
-0.231398	-0.123494	1752
0.0989228	0.0308577	1726
0.256625	-0.0478361	1728
0.290199	0.0153308	1754
0.293465	-0.0893799	1744

## Sheet: Sheet2
0.262258	-0.130082	-202
