# Supplementary material for: Spinal premotor interneurons controlling antagonistic muscles are spatially intermingled
Source: eLife. 2022 Dec 13;11:e81976. doi: 10.7554/eLife.81976 (PMC9844990; doi:10.7554/eLife.81976)
Supplement: Figure 12—figure supplement 9—source data 3. [file elife-81976-fig12-figsupp9-data3.xlsx]

## Sheet: Sheet1
-0.241103	-0.00157936	-4008
-0.208395	0.00484514	-4020
-0.0449604	-0.0786644	-4022
-0.147147	0.00458638	-4026
-0.189458	-0.0827422	-4032
-0.155948	-0.250252	-4032
-0.0762157	-0.074078	-4042
-0.211274	-0.0176138	-4044
-0.199252	-0.0433208	-4046
-0.12627	-0.18275	-4036
0.273128	-0.000874446	-4044
0.067171	0.124029	-4050
0.129379	0.237091	-4052
0.183266	0.243828	-4052
0.148001	0.196465	-4044
0.153135	0.221467	-4040
0.117508	0.22111	-4040
-0.138062	0.215658	-4050
-0.215882	0.275325	-4040
0.321766	-0.0138537	-3524
-0.126067	0.0205332	-3528
0.105376	-0.0146468	-3530
-0.178829	0.0912352	-3530
0.105236	0.125404	-3532
0.13909	0.134441	-3534
0.283216	0.025983	-3534
0.204655	0.0142466	-3530
-0.0502171	-0.00381268	-3536
-0.135711	-0.00712332	-3542
0.234515	-0.0174554	-3544
0.133901	0.184973	-3542
0.286082	0.0198129	-3552
0.296233	0.00763992	-3552
0.26678	-0.0548619	-3554
0.224217	0.189914	-3552
0.28691	0.21215	-3550
0.179249	0.0862292	-3534
-0.198384	-0.00277948	-3526
0.234756	0.00236474	-3534
0.172651	0.0845193	-3556
0.170146	0.0660671	-3556
0.0745943	0.208293	-3556
0.0439725	0.0863165	-3544
0.27613	-0.215649	-3542
0.261424	-0.182572	-3542
0.262653	-0.164389	-3542
0.192773	0.196354	-3060
0.11908	0.0813969	-3058
0.108634	0.175112	-3060
-0.161342	-0.123383	-3058
0.0666164	-0.0430728	-3058
-0.139991	-0.15049	-3072
-0.177756	-0.089227	-3078
-0.172444	-0.0749438	-3078
-0.159964	-0.039969	-3080
-0.203795	-0.0509401	-3074
-0.0667083	-0.0190988	-3080
-0.18963	0.222234	-3072
-0.178271	0.148526	-3076
-0.134795	-0.118619	-3082
-0.0101582	-0.00833619	-3084
0.309843	0.0408175	-3076
0.345716	0.253963	-3078
0.193545	0.257305	-3080
0.132688	0.167498	-3082
0.210626	-0.00333447	-3078
0.224375	-0.0982851	-3076
0.273836	-0.0334638	-3074
0.328499	-0.0742814	-3074
0.233816	-0.010837	-3070
0.320522	0.0133751	-3068
0.33141	-0.0604895	-3068
0.184888	-0.00584277	-3070
0.212605	-0.046772	-3064
0.290905	0.0586808	-3064
0.15793	0.212156	-3066
0.300586	0.0738199	-3058
0.138808	0.202517	-3056
0.293417	-0.139393	-3050
0.315431	-0.0869271	-3046
0.321478	-0.00649776	-3046
0.29093	-0.226424	-3062
-0.195279	-0.0275303	-2570
0.145854	0.195434	-2574
0.065546	0.0991577	-2574
0.177639	0.15749	-2578
-0.233645	0.25458	-2586
-0.348153	0.203098	-2588
-0.187934	-0.0234999	-2588
0.083186	0.0884032	-2584
0.0679728	-0.00981484	-2590
-0.159092	0.274335	-2592
-0.25437	0.0413407	-2596
-0.189257	-0.0554991	-2596
-0.0886566	0.19952	-2600
0.15946	0.0747042	-2598
0.14468	0.0309829	-2594
-0.0632795	-0.0161005	-2580
-0.252198	0.232807	-2590
0.0838505	0.0948489	-2600
-0.169036	-0.143492	-2570
-0.212623	-0.211952	-2580
-0.180618	-0.0779062	-2592
-0.20552	-0.120381	-2592
0.114158	-0.0480788	-2606
0.365834	0.00913267	-2606
0.224988	0.159516	-2606
0.184955	-0.017792	-2606
0.273315	0.0341501	-2606
0.379404	0.0290269	-2606
0.253053	0.0192677	-2606
0.275018	0.159328	-2606
0.153324	0.154079	-2606
0.26648	0.180718	-2606
0.355463	0.0582486	-2606
0.362856	0.00980092	-2606
0.373785	-0.0127245	-2582
0.122008	0.0053738	-2606
0.170152	-0.0238758	-2606
0.359705	-0.0853195	-2600
0.308381	-0.128108	-2600
0.238872	-0.13548	-2600
0.247997	-0.076152	-2600
0.325102	-0.104692	-2600
0.272093	-0.0780872	-2600
0.232464	-0.0528192	-2600
0.34133	-0.0453919	-2600
0.256174	-0.0370249	-2600
0.33504	-0.10126	-2600
0.191735	0.225718	-2086
0.116612	0.158116	-2088
0.0380609	0.177724	-2114
-0.17464	0.150416	-2114
-0.0505027	-0.00776992	-2108
-0.172929	-0.134923	-2106
-0.266181	-0.0537022	-2100
-0.168521	-0.0511565	-2102
0.173817	0.241149	-2100
0.169321	0.205477	-2102
-0.0516354	0.00450577	-2094
-0.086526	0.0453701	-2094
-0.159425	-0.104656	-2124
-0.132469	-0.12032	-2126
0.163675	0.0950038	-2124
0.17659	0.113066	-2124
0.109734	0.197934	-2122
0.0712759	0.173609	-2124
0.188857	-0.0260038	-2120
0.178307	0.134189	-2116
0.17001	0.0664777	-2114
0.077745	0.086125	-2112
0.0563703	0.0753409	-2114
0.175428	0.175741	-2112
0.231034	0.186712	-2110
0.214528	0.0851177	-2106
0.188816	-0.0363273	-2106
0.151876	-0.00923019	-2106
0.127109	0.0431601	-2102
0.234718	-0.0579581	-2090
0.224547	0.152751	-2108
0.10222	-0.194326	-2120
0.297551	-0.210436	-2088
0.325331	-0.0356948	-2090
0.300097	-0.115182	-2092
0.39012	-0.0919427	-2096
0.33887	0.0736307	-2092
0.363649	-0.0343204	-2094
0.360245	-0.0582158	-2102
0.350845	-0.00022646	-2104
0.240778	-0.0768246	-2108
0.243995	-0.194459	-2106
0.258124	-0.215566	-2104
0.324764	-0.111465	-2110
0.33915	-0.0654781	-2110
0.362878	-0.0110575	-2114
0.285051	-0.120117	-2116
0.289885	-0.0442534	-2116
0.279242	-0.155601	-2114
0.263303	-0.202604	-2116
0.270362	0.118493	-2122
0.260722	-0.00172578	-2124
0.284351	0.0268863	-2124
0.224565	-0.264818	-2120
0.319936	-0.256064	-2120
0.26036	0.185471	-2122
0.28598	0.236151	-2114
0.210628	0.464071	-2116
0.266812	0.201588	-2092
-0.18828	-0.00248883	-1614
-0.203579	-0.0354388	-1612
-0.179073	-0.117848	-1614
0.12795	0.153635	-1612
0.100432	0.14824	-1612
0.0861971	0.233571	-1614
-0.123805	0.0759866	-1620
-0.164018	-0.135471	-1614
0.159769	0.17302	-1610
-0.195738	-0.210152	-1630
-0.168011	-0.196896	-1628
-0.19965	-0.166412	-1626
-0.210816	-0.170269	-1628
-0.0758853	-0.0326408	-1628
-0.184363	-0.0264883	-1624
0.0703632	0.200714	-1620
0.0866621	0.213035	-1622
0.115429	0.0764195	-1622
0.0688461	0.108712	-1644
0.156339	0.148472	-1642
-0.138128	-0.127286	-1646
-0.217019	-0.0263491	-1648
-0.291555	-0.00690998	-1646
0.0669976	0.0189213	-1646
0.0824304	0.225239	-1630
0.147568	0.12734	-1636
-0.214554	-0.10215	-1634
-0.225261	-0.245003	-1634
0.0666721	0.11985	-1622
-0.208253	0.146996	-1636
-0.219152	-0.209425	-1626
0.217513	-0.0783441	-1614
0.211462	-0.000502404	-1616
0.0974389	-0.190488	-1628
0.191163	0.145944	-1616
0.271618	0.0570499	-1620
0.166616	0.133021	-1622
0.224848	0.12506	-1622
0.21803	0.178091	-1630
0.213473	0.132998	-1630
0.273135	0.174775	-1630
0.169819	0.260894	-1628
0.113494	0.253977	-1630
0.217048	0.187744	-1634
0.183374	0.231083	-1638
0.211485	0.219048	-1638
0.200877	0.143038	-1642
0.20612	0.128229	-1650
0.120591	0.0199802	-1650
0.130723	0.317171	-1640
0.154845	0.198906	-1638
0.201464	0.0398213	-1640
0.205684	0.165948	-1632
0.212409	0.0920558	-1640
0.184101	0.208822	-1644
0.270629	0.0616488	-1648
0.139634	0.0126451	-1642
0.177254	0.12489	-1634
0.235782	0.154841	-1614
0.339836	0.0515157	-1650
0.321595	-0.00486172	-1650
0.299536	-0.0314969	-1650
0.219129	-0.0564779	-1650
0.282685	0.00615251	-1650
0.31737	0.0603735	-1650
0.285713	-0.0889332	-1650
0.24907	-0.106456	-1650
0.230283	-0.173499	-1640
0.378299	-0.205189	-1640
0.369469	-0.145813	-1638
0.230126	-0.269621	-1636
0.194134	-0.210708	-1644
0.278849	-0.292422	-1644
0.322549	-0.0296959	-1648
0.336081	0.0122973	-1648
0.347299	-0.121497	-1654
0.136553	-0.166172	-1656
0.236671	0.00255067	-1660
0.319561	-0.0136886	-1654
0.281639	-0.11165	-1662
0.255092	-0.16536	-1658
0.257795	-0.174357	-1664
0.259591	-0.0810339	-1666
0.201934	-0.0124442	-1664
0.363988	-0.0117253	-1664
0.217286	-0.262077	-1664
0.273646	-0.13054	-1666
0.08797	0.156728	-1172
0.376076	0.083087	-1162
0.0885467	0.123216	-1158
0.117482	0.0955648	-1158
0.092252	0.0926679	-1154
0.0583818	0.160884	-1150
0.123026	0.00927854	-1144
-0.094929	-0.0262066	-1148
-0.124419	-0.20129	-1136
-0.1765	-0.209183	-1146
-0.167768	-0.163101	-1150
-0.138707	-0.115734	-1128
-0.1847	-0.107648	-1126
-0.164617	-0.028541	-1152
-0.233011	0.129614	-1152
-0.210191	0.137062	-1166
-0.0627564	0.429861	-1150
-0.341292	-0.0129984	-1116
-0.334888	0.00740604	-1134
0.206322	-0.322641	-1132
0.238092	-0.23937	-1160
0.299461	-0.266659	-1166
0.254584	-0.272025	-1166
0.155896	0.231556	-640
0.112507	0.120328	-642
0.093504	0.0973653	-642
0.0822807	0.16797	-642
0.17108	0.245047	-642
0.215294	0.181777	-642
0.120868	0.124064	-646
0.153308	0.177372	-654
0.22706	0.223746	-654
0.0575246	0.112614	-654
0.247885	0.187892	-660
0.207247	0.198357	-660
0.277696	0.173526	-646
0.221286	0.129503	-646
0.208609	0.134184	-650
0.202779	0.19886	-648
0.234049	0.121844	-650
0.192189	0.108043	-648
0.128526	0.220974	-646
0.162677	0.135976	-660
0.125315	0.114558	-662
0.095925	0.173622	-666
0.242208	0.187003	-672
0.20638	0.173422	-670
0.234662	0.171837	-674
0.0494414	0.131806	-674
0.0743444	0.137714	-674
0.0743444	0.137714	-670
0.174676	0.127773	-668
0.171687	0.111366	-668
0.0800725	0.124368	-668
0.278339	0.0349713	-660
0.355191	0.0509231	-664
0.325547	0.0799451	-662
0.337672	0.0867629	-660
0.285354	0.0706457	-662
0.245049	0.089803	-662
0.153834	0.0283051	-662
0.245186	-0.0721002	-664
0.21806	-0.0755056	-666
0.220268	0.00483242	-666
0.205514	-0.0329307	-668
0.206872	0.0269678	-668
0.151403	0.00264714	-672
0.0984674	0.0077553	-672
0.262852	0.0791386	-664
0.305653	0.09427	-672
0.311447	0.0528257	-676
0.312339	0.0522742	-674
0.212939	0.00620424	-674
0.212939	0.00620424	-674
0.204117	-0.0579821	-674
0.220683	-0.0606775	-674
0.220683	-0.0606775	-674
0.220683	-0.0606775	-674
0.139228	0.085784	-676
0.0985485	0.0782493	-674
0.0221326	0.0563966	-666
0.350607	0.00417752	-680
0.107356	-0.0296287	-682
0.237371	0.0918435	-682
0.31832	0.0667232	-684
0.316563	0.0423405	-688
0.316563	0.0423405	-688
0.316563	0.0423405	-692
0.316563	0.0423405	-692
0.265389	0.00286085	-692
0.248691	0.00664543	-688
0.266108	0.185197	-686
0.29127	0.0419683	-684
0.27997	-0.0107678	-684
0.192437	0.0991025	-694
0.0156549	0.0575823	-688
0.163771	-0.0545767	-688
0.124925	-0.0429678	-688
0.106849	0.0733411	-686
0.107189	0.102653	-686
0.107346	0.0944424	-686
0.0874923	0.0694186	-694
0.129438	0.082482	-692
0.213572	-0.210317	-688
0.232276	-0.161931	-692
0.223327	-0.149302	-690
0.210751	-0.138603	-678
0.250367	-0.237002	-678
0.268585	-0.0788973	-688
0.257083	-0.19653	-670
0.233011	-0.209373	-674
0.267886	-0.217741	-674
0.270975	-0.179199	-680
0.239402	-0.20758	-668
0.206117	-0.189484	-666
0.206456	-0.123437	-668
0.256531	-0.129931	-664
0.241479	-0.0916643	-664
0.243596	-0.102439	-662
0.130182	-0.176366	-660
0.276977	-0.0639106	-658
-0.0558836	-0.0692669	-682
-0.129139	-0.0784216	-664
-0.106723	-0.0839365	-664
-0.0885153	-0.0382871	-660
-0.0810551	0.0143525	-662
-0.124155	-0.0510747	-670
-0.287339	-0.0131116	-674
-0.255093	-0.0201914	-678
-0.167742	-0.0757538	-686
-0.247293	-0.101302	-688
-0.180606	-0.184314	-694
-0.144439	-0.15754	-698
0.119859	0.21631	-168
0.0671322	0.169198	-168
0.153169	0.202906	-168
0.138642	0.135636	-168
0.131605	0.236981	-168
0.0748961	0.111945	-168
0.0864125	0.0898294	-168
0.114569	0.147076	-168
0.163012	0.149963	-168
0.252538	0.176327	-168
0.202094	0.160174	-168
0.110646	0.248761	-168
0.117195	0.0744055	-168
0.260902	0.195097	-168
0.291093	0.113805	-174
0.323686	0.148367	-174
0.235243	0.219947	-178
0.214304	0.141488	-178
0.345792	0.338236	-182
0.186215	0.214553	-182
0.296939	0.239036	-182
0.221302	0.22273	-182
0.14987	0.165463	-182
0.0628526	0.161736	-180
0.208189	0.196999	-184
0.23498	0.288029	-184
0.191739	0.215997	-184
0.200445	0.215116	-186
0.221053	0.188315	-188
0.318567	0.216636	-186
0.103375	0.184497	-186
0.144571	0.167949	-184
0.067586	0.107433	-194
0.211137	0.178486	-194
0.184063	0.163895	-194
0.177012	0.148686	-194
0.156214	0.154829	-194
0.214885	0.24023	-194
0.228719	0.150456	-192
0.198073	0.142001	-190
0.189548	0.128875	-190
0.261219	0.198151	-190
0.201075	0.182373	-196
0.229451	0.206793	-196
0.249024	0.222814	-204
0.265899	0.113652	-206
0.230149	0.251163	-202
0.196863	0.22752	-202
0.196863	0.22752	-192
0.313282	0.145305	-194
0.166452	0.122586	-202
0.12248	-0.103594	-172
0.133484	0.0302231	-176
0.262424	0.0887882	-176
0.292011	0.0415446	-178
0.301609	0.0527551	-178
0.20246	-0.0716983	-178
0.24736	-0.0121406	-180
0.24736	-0.0121406	-180
0.221448	0.0375672	-184
0.275278	-0.0264817	-184
0.278698	0.0598909	-186
0.27822	0.0263012	-190
0.291191	-0.0435646	-190
0.268051	-0.0624453	-192
0.227884	0.0180339	-192
0.167247	0.0170899	-194
0.0605444	-0.0237537	-194
0.173352	-0.0241077	-196
0.259452	0.0711846	-194
0.288058	0.0817356	-192
0.118322	0.0532826	-206
0.234043	-0.0801877	-202
0.224454	-0.0515958	-206
0.253884	-0.0690258	-202
0.318035	-0.219079	-168
0.218037	-0.210791	-168
0.241026	-0.216455	-172
0.23944	-0.164318	-172
0.213547	-0.111022	-174
0.295578	-0.241792	-184
0.229344	-0.205058	-184
0.234048	-0.223827	-180
0.238166	-0.190529	-178
0.168106	-0.193799	-178
0.212181	-0.0957921	-178
0.17688	-0.259958	-192
0.207165	-0.187947	-192
0.325286	-0.119692	-190
0.321934	-0.160445	-190
-0.127867	-0.143709	-188
-0.116858	-0.104476	-188
-0.138305	-0.0800419	-188
-0.0456023	-0.0832905	-188
-0.133728	-0.137982	-188
0.00853975	0.0304591	-188
0.0215934	0.0459455	-188
-0.039722	0.0554345	-188
-0.193657	0.167893	-202
-0.160606	-0.197207	-184
0.260071	-0.194243	310
0.239958	-0.161472	310
0.200772	-0.0521926	310
0.132776	-0.0702745	310
0.265872	-0.0702947	314
0.100732	-0.133514	306
0.227746	-0.147604	308
0.253138	-0.152384	308
0.284833	-0.18881	300
0.274026	-0.187423	302
0.273948	-0.207963	302
0.229809	-0.0855829	296
0.273232	-0.110491	288
0.215748	-0.101282	286
0.219781	-0.123564	288
0.180528	-0.10553	286
0.28522	-0.0527379	284
0.212664	-0.188824	284
0.220595	-0.167598	284
0.267494	-0.180294	284
0.252295	-0.196794	282
0.267494	-0.0839201	280
0.333834	0.0301523	288
0.234922	-0.0317006	288
0.246034	0.123282	288
0.254871	0.0652525	288
0.116008	0.00363524	288
0.367834	-0.0387422	288
0.371325	0.0472042	288
0.304767	0.0493113	288
0.322319	0.091682	288
0.132031	0.0909079	288
0.246446	-0.01926	288
0.367834	0.0279981	288
0.240558	0.0217643	288
0.201634	0.106795	288
0.297655	0.0841625	288
0.216358	0.204226	282
0.189795	0.18673	282
0.0685428	0.158624	280
0.0607182	0.123874	278
0.0791563	0.105886	278
0.0975897	0.202934	272
0.0933675	0.173865	272
0.116759	0.183613	270
0.186691	0.143989	270
0.317812	0.135628	280
0.197944	0.15128	278
0.187926	0.176067	278
0.212276	0.157197	276
0.232235	0.187181	276
0.234728	0.195098	272
0.163576	0.194943	274
0.225199	0.134995	264
0.242592	0.221689	264
0.223403	0.200638	260
0.130922	0.193253	262
0.208466	0.174599	252
0.119248	0.132262	252
0.226303	0.210696	250
0.202752	0.215637	248
0.148856	0.145585	250
0.0833011	0.14405	252
0.195349	0.160381	252
0.18519	0.162293	252
0.0487101	0.0499037	250
0.137395	0.122528	260
0.121751	0.138193	262
0.111239	0.133077	262
0.0363244	0.123255	266
0.0834027	0.110336	266
-0.0960935	0.0278836	280
-0.109457	-0.0297282	278
-0.115558	-0.0139418	280
0.037806	0.0454876	272
0.0998848	0.0897096	274
-0.0618221	-0.0108519	272
-0.114774	-0.0780836	264
-0.0266162	0.00640879	262
-0.0409581	0.0129118	262
-0.143269	-0.124453	260
-0.126748	-0.13237	260
-0.13206	-0.0745156	262
0.00601855	-0.089723	256
-0.150149	-0.159567	256
-0.16207	-0.108707	258
-0.110668	-0.151832	250
-0.0925637	-0.19466	224
-0.344641	0.0487055	252
0.131972	0.172808	788
0.0732099	0.122021	788
0.106105	0.238676	786
0.165452	0.178491	784
0.20833	0.228513	782
0.15295	0.216655	782
0.172337	0.189945	778
0.317953	-0.0848229	790
0.211324	0.0328242	784
0.390803	0.0897417	784
0.310954	0.0677213	782
0.305413	0.0263419	782
0.267835	0.00982002	776
0.213095	-0.0606505	782
0.150715	0.103163	780
0.385442	0.0846384	780
0.29449	0.065499	772
0.292823	0.022319	772
0.154327	0.00861668	768
0.156195	0.065297	764
0.172796	0.09127	762
0.17861	0.108618	758
0.308642	-0.0236541	766
0.318549	0.0227143	768
0.39236	0.104041	768
0.318675	-0.0741508	782
0.265415	-0.0523764	780
0.326051	-0.0739488	770
0.325379	-0.0499609	760
0.21286	-0.225571	772
-0.161884	-0.199431	790
-0.142884	0.0294864	788
-0.213138	-0.115434	784
0.136699	0.0859472	784
0.102799	0.0526048	780
-0.226515	-0.00957408	776
-0.130595	-0.212931	774
0.0701937	0.101362	770
-0.0255617	0.0899349	770
0.0967007	0.03401	762
-0.0456756	-0.0862107	776
-0.292446	-0.139799	782
-0.247891	0.0741421	752
-0.295446	0.0290472	748
0.273851	-0.147652	788
0.34987	-0.120291	786
0.349936	-0.108407	788
0.247754	-0.242725	786
0.31997	-0.103198	766
0.342624	-0.123365	770
0.362596	-0.168548	768
0.386759	-0.142021	768
0.310719	-0.16875	766
0.398584	-0.0983144	772
0.34581	-0.0963733	776
0.318314	-0.142206	776
0.257207	-0.284623	784
0.310669	-0.266283	780
0.222881	-0.253292	786
0.292217	-0.232791	788
0.269879	-0.233116	788
0.255032	-0.222126	1264
0.247971	-0.231902	1260
0.227286	-0.239302	1254
0.391243	-0.0744139	1252
0.359956	-0.116345	1252
0.359325	-0.127974	1250
0.318168	-0.0572459	1250
0.271334	-0.0658118	1250
0.365282	-0.120827	1244
0.284465	-0.178631	1242
0.287705	-0.138567	1264
0.42115	0.131073	1220
0.170588	0.0956367	1226
0.353288	0.0881714	1244
0.29466	0.0608011	1246
0.338821	0.00471377	1252
0.258772	-0.0432059	1260
0.215392	0.0481659	1250
0.131965	0.0874111	1260
0.300224	0.11594	1232
0.124685	0.111813	1230
0.0975812	0.267461	1234
0.17464	0.323375	1260
-0.0867423	0.191273	1268
0.0552808	0.042185	1266
-0.0439425	0.0518515	1264
0.0740553	0.0571807	1258
0.138845	0.0137431	1254
-0.31381	-0.0989675	1278
-0.176269	-0.0842831	1262
-0.160367	-0.182164	1254
-0.320915	-0.146894	1248
-0.197531	0.186836	1748
0.279541	0.118484	1754
0.270508	0.190499	1752
-0.188771	0.218164	1744
0.14969	0.16831	1718
-0.134826	-0.100605	1708
0.369252	-0.138774	1708
0.369539	-0.127359	1708
-0.249765	-0.106337	1708
0.27966	-0.0923476	1708
-0.263101	-0.171076	1708
-0.14645	-0.0277949	-4016
-0.099064	-0.0982591	-4024
-0.13051	-0.0413042	-4042
0.163225	0.0134468	-4022
0.0969409	-0.0240829	-4036
0.101923	0.0546439	-4032
0.278189	0.117202	-4040
0.0350152	0.0259746	-4042
0.161772	0.0838843	-4042
0.18115	0.164949	-4056
0.0931087	0.204031	-4054
0.247926	0.309991	-4052
-0.12301	-0.0165252	-4038
-0.0588297	0.114775	-4040
-0.30766	0.195073	-3522
0.173098	0.180244	-3528
0.176605	-0.0163058	-3526
0.289027	0.0498123	-3526
0.0420223	0.0295556	-3530
-0.298451	0.21434	-3534
0.223222	0.138661	-3534
0.385841	0.197612	-3534
0.324965	-0.0574449	-3532
-0.19827	0.0073707	-3526
0.088339	-0.0912352	-3542
-0.19465	0.0732268	-3542
0.273853	0.177341	-3546
0.247051	0.237667	-3544
-0.127489	-0.028064	-3552
-0.00831497	0.0577214	-3552
0.10185	0.202101	-3548
0.162619	0.133902	-3548
0.0907634	0.120492	-3546
0.151559	-0.00326698	-3546
-0.116349	-0.111223	-3548
0.0491618	0.00872406	-3556
-0.130461	-0.15154	-3546
0.259788	-0.0170743	-3058
0.254617	0.0176772	-3058
0.212274	0.159511	-3060
0.0341874	0.04899	-3062
0.211864	0.0388526	-3062
0.233099	-0.0642631	-3062
-0.165264	0.0525775	-3052
-0.2458	-0.0186001	-3052
-0.154536	-0.0966923	-3054
-0.124521	-0.0840764	-3056
-0.296916	0.254723	-3056
-0.392579	0.194829	-3050
-0.0856523	0.18743	-3054
-0.0678724	-0.150922	-3056
-0.273505	0.0353171	-3058
-0.125666	-0.159184	-3072
-0.106771	-0.111355	-3076
-0.132032	-0.0453876	-3076
-0.256785	0.00893163	-3080
-0.0288142	-0.0913482	-3072
-0.0726452	-0.0522203	-3070
-0.0561948	-0.0665481	-3076
-0.187914	0.0926359	-3066
0.0427526	0.288916	-3048
0.320902	0.0329949	-3050
0.338559	0.00536642	-3052
0.308324	0.0616357	-3076
0.19746	0.23485	-3074
0.120391	0.194077	-3074
0.207643	0.207846	-3076
0.163579	0.170505	-3080
0.112469	0.226826	-3082
0.169252	-0.038019	-3078
0.20344	-0.0913854	-3078
0.243527	-0.0247406	-3074
0.300224	-0.115851	-3064
0.16024	0.06369	-3066
0.163726	0.220708	-3066
0.279522	0.222755	-3068
0.259775	0.176028	-3070
0.28862	0.267882	-3070
0.329743	0.137748	-3070
0.203507	0.180612	-3070
0.0703599	0.264867	-3068
0.165735	0.151399	-3064
0.157366	0.0720931	-3062
0.171292	0.0944148	-3062
0.189906	0.0469134	-3060
0.236426	0.123822	-3056
0.253979	0.122587	-3054
0.181132	0.0282612	-3054
0.334418	0.0166873	-3064
0.134054	0.138195	-3056
0.180813	0.187691	-3050
0.211239	0.117198	-3044
0.00986411	0.0409887	-3060
0.0697104	0.0709171	-3060
0.07365	0.0194263	-3058
0.2567	0.147424	-3080
0.268273	0.155023	-3080
-0.248392	-0.079685	-3070
0.0263679	0.0241891	-2570
-0.311224	0.166922	-2566
-0.286926	0.064228	-2568
0.159727	0.105095	-2574
0.131519	0.0857859	-2578
0.0522493	0.202589	-2580
0.145842	0.213734	-2584
0.107964	0.265662	-2584
-0.1286	0.0839761	-2588
0.109127	0.156975	-2590
0.0671481	0.0849506	-2588
0.0338025	0.00559655	-2588
-0.0490335	-0.00629264	-2594
-0.175325	0.0285535	-2594
-0.33272	-0.010316	-2594
0.0677829	0.221377	-2600
0.120317	0.217966	-2600
0.0618852	0.179034	-2600
0.0913622	0.147	-2598
0.0772941	0.177092	-2596
0.0697291	0.167729	-2596
0.113921	0.0233259	-2596
-0.276751	0.159745	-2604
-0.106077	0.00798413	-2602
-0.214972	-0.105193	-2574
-0.050321	-0.0516428	-2578
-0.120756	-0.0966309	-2578
-0.18273	-0.116469	-2582
-0.191743	-0.0622233	-2584
-0.104908	-0.105534	-2588
-0.0577733	-0.0857302	-2592
-0.16512	-0.161054	-2598
-0.167689	-0.109592	-2598
-0.156445	-0.0862731	-2602
-0.182778	-0.147515	-2604
0.264599	0.0456634	-2606
0.327333	0.0845399	-2606
0.322604	0.137944	-2606
0.313834	0.189955	-2606
0.341691	0.163233	-2606
0.184433	0.284575	-2606
0.256482	0.272282	-2606
0.228993	0.0810246	-2606
0.33688	0.100028	-2606
0.306269	0.096798	-2606
0.242284	0.0546916	-2606
0.188325	0.132633	-2606
0.278442	0.177649	-2606
0.359931	0.00139914	-2606
0.208143	0.117159	-2606
0.204945	0.179876	-2606
0.3331	0.0619658	-2606
0.213068	0.0706042	-2606
0.266812	0.0603926	-2606
0.224365	0.242322	-2606
0.179603	0.204337	-2606
0.229604	0.281742	-2606
0.431321	0.235431	-2606
0.173652	-0.0577753	-2600
0.183074	-0.0869762	-2600
0.113184	0.327242	-2088
0.00778851	-0.0424183	-2114
-0.302864	-0.0889675	-2114
-0.12036	-0.0285964	-2106
-0.0872149	-0.0270034	-2100
0.12555	0.0157819	-2108
0.121977	0.13561	-2108
-0.225014	0.28416	-2098
0.0809269	0.2039	-2098
0.0696003	0.162809	-2100
0.0837469	0.228771	-2104
0.121504	0.201916	-2102
0.196844	0.19684	-2102
-0.00350892	-0.0995408	-2100
-0.0726947	-0.0875228	-2092
-0.192126	-0.108982	-2090
-0.193563	-0.057841	-2090
-0.28727	0.0816739	-2094
-0.139037	-0.0930125	-2096
-0.0006072	-0.0540224	-2106
-0.132521	-0.156999	-2110
-0.13589	-0.0886629	-2124
-0.156909	0.040997	-2124
0.202268	0.107912	-2122
0.101496	0.275164	-2120
0.13777	0.357853	-2118
0.114883	0.226921	-2120
0.207353	0.237697	-2120
-0.284742	0.288041	-2120
0.106237	0.14021	-2120
0.240101	0.0541551	-2114
0.159694	-0.0178513	-2112
0.111772	0.0215293	-2110
0.0941102	0.0908729	-2112
0.0859772	0.12517	-2112
0.217594	0.185104	-2112
0.244024	-0.0122991	-2116
0.190334	0.0150947	-2090
0.137437	0.119469	-2100
0.153557	0.0147433	-2098
0.201503	0.239438	-2094
-0.168229	-0.198285	-2110
0.288543	0.13579	-2090
0.247311	0.110091	-2088
0.298871	0.0958238	-2094
0.143282	-0.141178	-2102
0.287556	0.128637	-2104
0.260214	0.0542567	-2094
0.308656	0.0671571	-2092
0.242115	0.139515	-2092
0.307342	0.14926	-2096
0.228984	0.125396	-2096
0.218586	0.00724672	-2102
0.19306	0.0405129	-2100
0.167961	0.134626	-2104
0.0820888	-0.152048	-2110
0.290411	0.185026	-2112
0.239605	0.184042	-2112
0.297119	0.0300176	-2120
0.3192	-0.0242937	-2120
0.265043	0.0350388	-2120
0.26241	0.0697887	-2118
0.338088	0.104906	-2122
0.182726	-0.0965188	-2124
0.309106	0.193881	-2120
0.30318	0.188149	-2114
0.414023	0.265255	-2108
0.259064	0.29913	-2092
0.234858	0.210014	-2090
0.33201	0.166589	-2088
-0.132135	-0.0631715	-1604
-0.097497	-0.0875883	-1604
-0.0816166	-0.120693	-1608
-0.0596852	-0.0185116	-1610
0.0381257	0.0134026	-1616
-0.230667	-0.123831	-1614
-0.120277	-0.118459	-1614
-0.0500942	-0.121365	-1614
-0.182549	0.144801	-1616
-0.117865	-0.183486	-1616
-0.151306	-0.140851	-1618
-0.0922888	-0.147606	-1616
0.0631263	0.125122	-1612
-0.143801	0.292963	-1624
-0.0546165	-0.0444975	-1630
-0.0878944	-0.101687	-1630
-0.226377	-0.0818377	-1628
-0.285789	-0.0735828	-1626
-0.0775012	0.0943514	-1628
-0.0462694	-0.039087	-1628
-0.188798	0.102058	-1622
-0.11851	-0.0153736	-1622
-0.110802	-0.17176	-1622
-0.172522	-0.173515	-1622
0.0648818	0.182975	-1620
0.13353	0.0963301	-1622
0.104234	0.0948307	-1622
0.00745193	0.0455101	-1644
-0.0497861	0.161102	-1644
0.132583	0.185163	-1646
0.153317	0.108419	-1640
0.143098	0.0749664	-1642
-0.0533086	-0.0985639	-1638
-0.131908	-0.14126	-1640
-0.246373	0.15488	-1640
-0.0965786	0.0868154	-1640
0.00977121	-0.0374407	-1644
0.0786812	0.070437	-1626
0.102618	0.0836155	-1628
0.0953347	0.216235	-1632
0.130914	0.178979	-1634
-0.0801286	-0.0854086	-1636
-0.342545	-0.0657685	-1634
0.0199551	-0.00721916	-1630
-0.143598	-0.178771	-1624
-0.118731	-0.226414	-1644
0.136535	0.032463	-1616
0.341516	0.166048	-1618
0.345288	0.145798	-1620
0.118057	-0.0785914	-1620
0.193593	0.213537	-1620
0.200016	0.275711	-1622
0.226796	0.222472	-1624
0.164814	0.0868308	-1626
0.129438	0.00551871	-1626
0.18731	0.0460125	-1630
0.304396	0.317511	-1628
0.193047	0.237668	-1634
0.240891	0.267843	-1640
0.20101	0.206588	-1638
0.25268	0.177287	-1640
0.244484	0.123955	-1638
0.260794	0.232211	-1644
0.316329	0.208583	-1646
0.129769	-0.0581165	-1648
0.193413	0.0725007	-1638
0.172295	0.0978992	-1638
0.172807	0.175308	-1634
0.180654	0.0559987	-1634
0.18685	0.0337538	-1634
0.220146	0.133129	-1644
0.28819	0.148186	-1644
0.285016	0.192057	-1644
0.157798	0.180062	-1646
0.221372	0.0614401	-1650
0.202835	0.210708	-1648
0.286719	0.125346	-1624
0.184595	0.119541	-1626
0.0780592	0.259024	-1612
0.300135	0.044312	-1650
0.330605	0.0296727	-1650
0.24714	-0.00238062	-1650
0.224122	-0.252794	-1636
0.273943	-0.179621	-1638
0.339859	-0.176854	-1640
0.168779	-0.234568	-1640
0.257092	-0.0897834	-1644
0.29799	-0.186856	-1648
0.178387	-0.141624	-1658
0.261224	0.00313809	-1656
0.261934	0.0229483	-1654
0.365005	-0.262085	-1662
0.327687	-0.174798	-1660
0.34988	-0.154199	-1664
0.330803	0.00686361	-1662
0.0112411	-0.0200349	-1136
0.100903	0.143712	-1168
0.0589749	0.237808	-1160
0.0993416	-0.0325883	-1156
0.0919854	0.132335	-1158
0.147124	-0.0144426	-1148
-0.0683878	-0.156408	-1136
-0.0499157	-0.158877	-1134
-0.204924	-0.164318	-1138
-0.179923	-0.238807	-1146
-0.141847	-0.140362	-1148
-0.122265	-0.242695	-1150
-0.0734425	-0.14718	-1150
-0.0598019	-0.107723	-1138
-0.0803907	-0.0644292	-1138
-0.041814	-0.101795	-1126
-0.100952	-0.105104	-1128
-0.067909	-0.0980251	-1126
-0.067909	-0.0980251	-1126
-0.067909	-0.0980251	-1126
-0.0034115	-0.0625063	-1146
-0.0846945	-0.0752108	-1146
-0.0244137	-0.065336	-1152
-0.055928	-0.119445	-1148
-0.218755	-0.12026	-1148
0.126302	0.0159205	-1146
-0.269911	0.127263	-1144
-0.174036	0.185965	-1164
0.21296	-0.136886	-1166
0.266663	-0.200652	-1168
0.212667	-0.170121	-1164
0.263953	-0.268238	-1162
0.257315	-0.271236	-1162
0.33398	0.220892	-648
0.101962	0.212826	-648
0.134938	0.211151	-648
0.255412	0.177945	-648
0.366936	0.249204	-646
0.308677	0.3056	-646
0.248169	0.304904	-644
0.0625893	0.263301	-644
0.12724	0.351133	-650
0.16053	0.169982	-652
0.128466	0.25132	-652
0.0489501	0.204795	-652
0.27293	0.270677	-654
0.216707	0.192959	-660
0.238136	0.184225	-662
0.337267	0.193503	-660
0.0771603	0.173953	-658
0.0956667	0.196433	-656
0.182587	0.162889	-656
0.280264	0.163599	-654
0.265825	0.251851	-648
0.119268	0.272897	-642
0.235877	0.157112	-646
0.0734175	0.161503	-666
0.107847	0.115544	-664
0.102722	0.158263	-666
0.0565674	0.104528	-664
0.294364	0.26419	-668
0.10262	0.207346	-674
0.276612	0.187154	-672
0.193876	0.192759	-672
0.285602	0.13517	-672
0.186228	0.155451	-670
0.186228	0.155451	-668
0.231704	0.240146	-666
0.131368	-0.041534	-656
0.261636	0.0203913	-660
0.0465849	-0.0120156	-664
0.0684947	0.0119673	-664
0.124692	0.0439467	-664
0.0814096	0.067316	-666
0.212347	0.0547973	-668
0.184293	0.077429	-664
0.0799408	0.0519985	-668
0.116609	0.0631385	-670
0.127772	0.0596228	-670
0.285886	0.0340268	-672
0.125351	0.0384663	-672
0.0916656	0.00474969	-674
-0.00418342	-0.0502819	-678
0.192706	-0.0455254	-674
0.0951906	-0.0521984	-684
0.230235	0.0250376	-684
0.281667	0.0439605	-684
0.32652	0.113152	-690
0.249597	0.120804	-688
0.270398	0.149412	-688
0.246898	0.0606017	-692
0.199254	0.0192814	-694
0.165113	0.035309	-692
0.18403	0.0957384	-692
-0.0104028	0.0360467	-686
0.0542224	0.0230384	-686
0.000952159	-0.0517641	-692
0.00290712	-0.0382112	-686
0.0208563	0.0463664	-682
0.0556101	0.0597124	-688
0.11591	0.0689843	-688
0.0387498	-0.017882	-690
0.0670918	0.0787525	-690
0.144672	-0.207635	-694
0.279155	-0.23361	-692
0.187165	-0.0819925	-678
0.291472	-0.129662	-688
0.381223	-0.228171	-688
0.322397	-0.146406	-662
0.145062	-0.105217	-668
-0.353535	0.0336546	-690
-0.190204	-0.0353849	-686
-0.0756359	-0.0537908	-686
-0.155936	-0.0731274	-684
-0.266731	-0.118363	-682
-0.106748	-0.0951869	-680
-0.0534577	-0.0458631	-676
-0.0820832	-0.0391074	-672
-0.0960617	-0.0557072	-668
-0.23259	0.191725	-666
-0.0644581	-0.0321931	-664
-0.0299879	0.0294426	-658
-0.216945	0.139347	-660
-0.27682	0.21151	-660
-0.0764513	0.033365	-670
-0.0298309	-0.0683501	-670
-0.279626	0.016717	-676
-0.0984522	-0.11846	-670
-0.209936	-0.134984	-670
-0.229435	-0.25252	-672
-0.144288	-0.204733	-674
-0.131084	-0.14258	-676
-0.125027	-0.112745	-676
-0.0876797	-0.153176	-678
-0.0493654	-0.0914368	-678
-0.141912	-0.112	-676
-0.158261	-0.127249	-684
-0.121856	-0.132281	-682
-0.15149	-0.190594	-684
-0.157582	-0.178827	-692
-0.108647	-0.157457	-696
-0.0798142	-0.133812	-698
-0.110228	-0.183301	-696
-0.136534	-0.177524	-704
-0.16834	-0.137362	-704
0.0845143	0.177889	-168
0.0894136	0.169045	-168
0.121923	0.104073	-168
0.102062	0.0990546	-168
0.0749107	0.0913218	-168
0.15091	0.106211	-168
0.234589	0.291833	-168
0.181946	0.260284	-168
0.238371	0.146486	-168
0.238937	0.157363	-168
0.241607	0.160007	-168
0.273257	0.23442	-168
0.211415	0.21261	-168
0.206735	0.256167	-168
0.122655	0.22795	-168
0.0827673	0.0762241	-168
0.142004	0.0906138	-160
0.29712	0.114458	-174
0.198493	0.0969652	-174
0.249087	0.111653	-174
0.187318	0.11377	-174
0.027459	0.242548	-182
0.0129804	0.250593	-182
0.0804201	0.19527	-184
0.188851	0.248268	-182
0.315434	0.224646	-178
0.295241	0.196249	-180
0.259008	0.160334	-178
0.188528	0.165422	-182
0.188733	0.165463	-182
0.188733	0.165463	-182
0.151378	0.175341	-184
0.135963	0.180207	-186
0.166618	0.182387	-186
0.123407	0.234975	-188
0.0869786	0.16824	-190
0.123148	0.163798	-194
0.165754	0.0925574	-194
0.263659	0.295178	-192
0.131727	0.0986381	-188
0.123099	0.119261	-190
0.116126	0.0930086	-194
0.21771	0.19838	-198
0.298925	0.164443	-198
0.300502	0.140863	-200
0.276571	0.251246	-204
0.246745	0.175418	-204
0.261995	0.13944	-194
0.261995	0.13944	-194
0.190051	0.087143	-198
0.121386	0.415758	-170
0.177724	0.0297025	-176
0.213255	0.0159653	-178
0.163446	0.0308617	-180
0.21305	0.00136053	-182
0.16999	0.0635282	-184
0.106078	0.0512279	-186
0.0455486	0.0325901	-186
0.0754865	0.021817	-186
0.253421	0.0352279	-186
0.200645	0.0839708	-188
0.209107	0.00321389	-194
0.0612178	0.0178881	-196
0.122284	0.021345	-194
0.190597	0.0605226	-192
0.17668	-0.0498744	-200
0.160982	0.0449112	-200
0.138944	0.0235871	-204
0.236859	0.0320279	-206
0.298599	-0.0359567	-202
0.135504	0.0687412	-202
0.211527	0.0527412	-208
-0.118459	-0.121205	-188
-0.0934249	-0.108224	-188
-0.145761	-0.159653	-188
-0.183697	-0.132526	-188
-0.0442213	-0.0510613	-188
-0.00396244	-0.0399203	-188
0.0145127	-0.0144174	-188
-0.124534	-0.0277381	-188
-0.124134	-0.113493	-188
-0.138324	-0.0722675	-188
-0.133044	-0.12562	-188
-0.0337052	-0.0488748	-188
0.00129316	-0.0702198	-188
-0.173098	-0.167275	-188
-0.198415	-0.175584	-188
-0.0613935	-0.148242	-188
-0.185679	-0.0371021	-188
-0.109119	-0.157043	-188
-0.218403	-0.146402	-188
-0.221419	-0.191195	-188
0.0329488	0.028578	-188
0.025224	-0.000805209	-188
-0.00773457	-0.0659855	-188
-0.00824208	0.0569755	-188
-0.00121996	-0.0438006	-188
-0.267558	0.0675542	-190
-0.135416	-0.206002	-176
-0.166184	-0.193236	-182
-0.106923	-0.187253	-194
-0.156009	-0.191633	-196
-0.133815	-0.177104	-202
-0.0775653	-0.185094	-208
0.158729	-0.161573	310
0.110363	-0.164636	310
0.136567	-0.194781	298
0.144673	-0.12547	280
0.187476	0.0301859	288
0.208805	0.0595842	288
0.268675	0.0902616	288
0.231233	0.0386816	288
0.16022	0.0539362	288
0.208679	0.0661075	288
0.217302	0.0944017	288
0.203595	0.0782653	288
0.221413	-0.00394491	288
0.169996	0.00112423	288
0.188924	0.0130465	288
0.140577	0.0503548	288
0.115369	0.0474466	288
0.187481	0.09319	288
0.208558	0.083597	288
0.231712	0.0837586	288
0.196855	0.056676	288
0.201503	0.0615163	288
0.248388	-0.021421	288
0.162128	0.0970406	288
0.221399	0.0928871	288
0.24266	0.119949	288
0.311343	0.219299	276
0.30438	0.158018	276
0.240142	0.268375	276
0.233915	0.2613	270
0.258338	0.148163	270
0.196622	0.135992	272
0.228899	0.157022	274
0.233591	0.272232	274
0.0608247	0.192021	268
0.0999429	0.124971	266
0.201256	0.222739	266
0.205706	0.257893	268
0.281221	0.243265	270
0.174228	0.241373	268
0.140354	0.166541	280
0.166941	0.183566	276
0.0927283	0.280681	264
0.302288	0.17464	266
0.271736	0.167302	264
0.269591	0.144245	264
0.260555	0.165854	260
0.319681	0.213032	260
0.108532	0.153959	258
0.0928881	0.165888	256
0.173458	0.132336	254
0.165174	0.118778	254
0.255263	0.145558	254
0.151113	0.147645	254
0.279904	0.209316	250
0.287157	0.171449	248
0.172485	0.161182	250
0.175332	0.1836	248
0.108087	0.141552	250
0.0318117	0.0932236	256
0.0750407	0.0837047	260
0.0324556	0.138321	262
0.00655601	0.0616173	266
0.00306012	0.0461406	268
0.00718062	-0.0516338	282
-0.028156	-0.0531216	270
-0.00910288	0.00205324	268
-0.0413213	-0.102426	264
-0.0630084	-0.120643	264
-0.101037	-0.0627011	266
-0.0931932	-0.142548	260
-0.165309	0.0309264	258
-0.068383	0.0279038	252
-0.107554	-0.105812	252
-0.262047	0.238095	252
-0.113065	0.105321	252
-0.193707	0.165154	252
-0.220324	-0.0332759	252
-0.131144	-0.175562	252
-0.159145	-0.190318	238
-0.157184	-0.178376	240
-0.129387	-0.205903	242
-0.19208	-0.138624	228
-0.101943	-0.16605	228
0.199881	0.0697292	252
0.189347	0.19099	788
0.134825	0.317227	782
0.231498	0.286933	784
-0.00231684	0.268839	782
0.290539	0.310183	780
0.12094	0.212053	778
0.0559976	0.193607	780
0.186036	0.269506	778
0.165862	0.237332	774
0.221329	0.315312	770
0.312669	0.209154	768
0.293282	0.265712	766
0.121989	0.31179	768
0.173561	0.183691	758
0.182074	0.171262	774
0.286283	0.1377	788
0.165506	0.120581	786
0.287785	0.0188583	778
0.251213	0.0961273	782
0.230181	0.0754245	770
0.206051	-0.00114186	772
0.170736	0.133053	768
0.171184	0.0557932	758
0.25253	0.115846	758
0.25642	-0.0341593	758
0.233263	-0.0384369	758
0.312653	-0.0196664	760
0.249852	0.0013351	762
0.339985	0.0701016	766
0.285337	0.114169	766
0.28961	0.0764873	774
0.234913	0.126009	760
0.247634	-0.0967685	782
0.471537	-0.0693814	794
0.207319	-0.141512	768
0.356602	-0.190735	768
0.358706	-0.139483	776
0.21057	-0.151727	776
0.304391	-0.17012	780
-0.19915	-0.173888	798
-0.208668	-0.126852	796
-0.110667	-0.127107	794
-0.0951051	-0.104235	794
-0.096504	-0.139395	794
-0.12423	-0.0837162	786
-0.134918	-0.0992718	786
-0.134748	-0.0753805	786
-0.0823516	-0.123848	784
-0.0760021	-0.116356	786
0.00626749	-0.0523852	782
-0.0541069	0.00311817	780
0.0461455	0.00232764	780
-0.188385	-0.182197	778
-0.179325	-0.207802	782
-0.160507	-0.0859033	778
-0.113268	-0.135364	772
-0.127224	-0.155267	772
0.116197	0.0796054	768
0.0086335	0.0389815	770
0.0815593	0.0350464	758
-0.0114531	-0.054423	760
-0.220007	-0.243805	772
-0.222192	-0.182285	770
-0.269655	-0.154406	768
-0.387371	0.323507	770
-0.1955	0.141942	764
-0.201969	0.312185	758
-0.175047	0.214126	758
0.309183	-0.144418	1254
0.367055	-0.0899671	1234
0.270223	-0.148154	1230
0.202368	-0.165402	1230
0.224239	-0.0681143	1228
0.269642	0.0589982	1234
0.272602	0.128452	1238
0.402737	-0.0259656	1240
0.30387	0.0509319	1246
0.345246	-0.0170087	1250
0.259921	-0.0355452	1252
0.259921	-0.0355452	1252
0.314821	-0.0160963	1256
0.225026	0.0270227	1256
0.260889	0.034459	1256
0.176026	0.123854	1260
0.153536	0.0888593	1260
0.105348	0.0866943	1260
0.156608	0.225218	1260
0.0993981	0.119285	1254
0.194476	0.16924	1252
0.401857	0.11678	1252
0.249557	0.200527	1248
0.232018	0.185908	1234
0.215279	0.135157	1236
0.141979	0.189521	1236
0.222491	0.208572	1232
0.15157	0.117576	1230
0.189918	0.290733	1250
0.200164	0.255825	1250
0.0556617	0.151521	1248
0.159237	0.257925	1256
0.280038	0.474223	1242
-0.135224	0.164432	1242
-0.0885155	0.151862	1262
-0.128887	0.11253	1264
-0.255688	0.245905	1270
-0.257193	0.205769	1272
-0.150514	0.393966	1270
-0.0958892	0.0630892	1274
-0.0609563	-0.0301942	1266
-0.0138233	0.10295	1250
0.0385417	0.0167697	1248
-0.0826153	-0.0442559	1246
-0.100391	-0.00521339	1244
0.123274	0.0331991	1240
0.122568	0.0308821	1240
-0.144539	-0.195669	1272
-0.226736	-0.141145	1272
-0.212207	-0.116773	1266
-0.184617	-0.0741025	1264
-0.129342	-0.103594	1268
-0.298556	-0.118858	1262
-0.278184	-0.159689	1262
-0.205539	-0.146532	1264
-0.15727	-0.120958	1262
-0.0966072	-0.123948	1254
-0.10282	-0.13725	1248
-0.15466	-0.085753	1248
-0.250256	-0.142325	1248
-0.217596	-0.055204	1274
-0.202758	-0.032615	1756
-0.144875	0.21507	1754
0.195709	0.0438305	1754
0.211329	0.162122	1754
0.37558	0.0584525	1750
-0.286597	-0.0276723	1746
-0.185106	-0.0136121	1742
-0.256275	-0.0100917	1742
-0.22739	-0.020852	1742
0.206949	0.204772	1740
0.187257	0.221485	1740
0.138141	0.158794	1740
0.019306	0.101444	1738
-0.290585	0.13829	1732
-0.183291	0.0429628	1728
-0.155373	0.0575279	1716
-0.229639	0.207759	1720
0.0831033	-0.0211507	1722
0.227257	-0.00933788	1708
0.373379	-0.0651163	1708
-0.125275	-0.122345	1708
0.220691	-0.0308157	1708
0.323801	-0.137643	1708
-0.244054	-0.100292	1708
-0.1029	-0.0744613	1708
-0.139367	-0.0753574	1708
0.248728	-0.0332907	1708
-0.251419	-0.0570372	1708

## Sheet: Sheet2
0.319923	-0.158018	-216
0.348815	-0.203095	-214
0.2603	-0.200397	-2150
0.275402	-0.219087	-2150
0.282313	-0.181669	-2150
0.371175	-0.126001	-196
0.392562	-0.0867947	-210
0.320726	0.0170654	-212
0.331316	-0.0314785	-188
0.319458	0.000619337	-190
0.365786	-0.066269	-196
