# Supplementary material for: Spinal premotor interneurons controlling antagonistic muscles are spatially intermingled
Source: eLife. 2022 Dec 13;11:e81976. doi: 10.7554/eLife.81976 (PMC9844990; doi:10.7554/eLife.81976)
Supplement: Figure 12—figure supplement 9—source data 4. [file elife-81976-fig12-figsupp9-data4.xlsx]

## Sheet: Sheet1
0.186898	0.210083	-5036
0.220392	-0.00988936	-5014
-0.0795449	-0.022114	-5004
-0.0118362	0.0700514	-5028
-0.259808	-0.132157	-5024
-0.0116349	0.0434589	-4544
0.2238	-0.0495741	-4552
0.152772	0.0562067	-4552
0.273758	0.00652589	-4046
0.310818	0.0497455	-4048
0.245117	0.0377002	-4072
0.209191	0.0977345	-4072
0.278389	-0.0261164	-4070
-0.253629	-0.0815288	-4056
-0.139328	-0.0564146	-3596
0.209569	-0.0667293	-3564
0.267095	0.00709179	-3568
0.16023	0.00191843	-3570
0.197735	-0.123956	-3574
0.249631	-0.0930438	-3580
0.241601	-0.0714359	-3584
0.203639	-0.0467201	-3592
0.342386	-0.0146568	-3594
0.287084	0.147853	-3616
-0.17028	0.0395192	-3094
0.162314	-0.006084	-3094
0.0968493	0.126538	-3120
0.18493	0.096158	-3112
0.0998701	0.10389	-3088
0.153368	-0.200812	-3090
0.273783	-0.0598751	-3096
0.305854	-0.0885195	-3104
0.204256	-0.0416365	-3104
0.307263	-0.0760768	-3116
0.111524	-0.173173	-3108
-0.176144	-0.0964385	-2618
-0.0588228	-0.0514381	-2630
-0.20248	-0.150041	-2634
-0.17399	-0.0446868	-2638
0.0488135	0.0925728	-2628
0.04535	-0.0463884	-2634
0.213639	-0.302152	-2616
-0.112627	-0.143677	-2136
-0.17203	-0.163576	-2134
-0.147348	-0.116067	-2138
-0.124943	-0.0438905	-2140
-0.165147	0.00950064	-2140
-0.180846	-0.0485588	-2146
-0.0939563	-0.0744446	-2150
-0.277999	-0.0170408	-2160
-0.130442	-0.100317	-2164
-0.146873	-0.0881612	-2136
0.0828267	0.0912232	-2132
0.0906451	0.154292	-2136
0.191051	0.212902	-2140
0.245728	0.136582	-2140
0.236118	-0.0428349	-2138
0.0577526	0.101681	-2136
0.186043	0.104756	-2140
0.267423	0.00542894	-2144
0.341925	0.0269873	-2146
0.156963	0.0856894	-2144
0.220863	-0.0614362	-2146
0.256466	0.121686	-2156
0.0802624	0.160278	-2158
0.303695	0.000491752	-2162
0.319128	0.00574366	-2164
0.215629	-0.0148837	-2162
0.117939	0.0392418	-2162
0.324794	0.0502832	-2154
0.309335	-0.0714286	-2154
0.220507	-0.0703074	-2158
0.157396	0.159006	-2162
0.142809	0.148358	-2164
0.184293	0.0964227	-2166
0.206296	0.12438	-2168
0.165011	0.127855	-2170
0.342478	-0.0570563	-2168
0.308593	-0.107825	-2136
0.249457	-0.117011	-2136
0.249237	-0.229458	-2136
0.248256	-0.156056	-2136
0.271361	-0.225065	-2136
0.123392	0.0815372	-1684
-0.255029	0.0203958	-1670
-0.245835	0.160673	-1664
-0.102118	0.0178108	-1662
-0.199854	-0.0673775	-1658
-0.117322	-0.0519905	-1654
-0.191454	-0.150295	-1650
0.188938	0.106942	-1684
0.270392	0.0430697	-1680
0.315609	-0.0115134	-1678
0.240719	0.165061	-1678
0.247672	0.0810309	-1670
0.118016	0.108415	-1670
0.0920607	0.168981	-1668
0.241857	-0.0138375	-1662
0.157503	0.1351	-1658
0.137158	0.16174	-1658
0.0667096	0.104602	-1658
0.0950955	0.0749942	-1660
0.0553393	0.0661579	-1664
0.198397	0.115571	-1660
0.272204	0.00886707	-1654
0.14448	0.123871	-1652
0.136808	0.135752	-1654
0.160018	0.00232415	-1650
0.192252	0.146805	-1648
0.128573	0.218263	-1648
0.313218	0.111552	-1648
0.279347	0.0330828	-1666
0.00928893	0.0398788	-1680
0.185105	-0.0285342	-1682
0.205714	-0.193495	-1684
0.23681	-0.113884	-1684
0.308117	-0.110938	-1682
0.261418	-0.124085	-1682
0.231	-0.0740508	-1684
0.19656	-0.0716576	-1686
0.299831	-0.0823963	-1684
0.312869	-0.088011	-1680
0.240923	-0.21768	-1678
0.249888	-0.195543	-1678
0.217099	-0.180532	-1676
0.233471	-0.0949298	-1676
0.266649	-0.0650993	-1676
0.204137	-0.0270538	-1676
0.251969	-0.118908	-1672
0.282416	-0.277495	-1670
0.273282	-0.264854	-1672
0.20837	-0.216653	-1668
0.226703	-0.174012	-1666
0.222685	-0.0949145	-1666
0.269005	-0.110347	-1664
0.288536	-0.104464	-1662
0.274236	-0.145938	-1668
0.327004	-0.0429623	-1668
0.249069	-0.0671473	-1660
0.15633	-0.0437371	-1658
0.28331	-0.179052	-1656
0.266484	-0.17234	-1658
0.224527	-0.0361433	-1654
0.36125	-0.170461	-1648
0.421611	0.0454552	-1676
0.329314	-0.0233349	-1168
0.276706	-0.0636919	-1170
0.263853	-0.101472	-1168
0.244252	-0.073983	-1170
0.206846	-0.270028	-1172
0.244172	-0.207481	-1174
0.339557	-0.00878635	-1176
0.325291	0.000836796	-1176
0.192615	-0.104181	-1176
0.096119	-0.0644186	-1176
0.238616	-0.0730361	-1172
0.222328	-0.222566	-1178
0.284968	-0.0520501	-1178
0.294255	-0.0568507	-1180
0.253942	-0.116028	-1182
0.304639	-0.291403	-1178
0.28174	-0.27408	-1184
0.274147	-0.287175	-1184
0.198282	-0.120601	-1186
0.246636	-0.108798	-1186
0.0554891	-0.133271	-1192
0.342569	-0.0242524	-1196
0.287834	0.00793488	-1194
0.286999	-0.0747758	-1194
0.4011	-0.135267	-1188
0.304911	-0.0853458	-1200
0.227266	-0.204648	-1200
0.232878	-0.193021	-1198
0.122131	0.021786	-1202
0.135492	0.257036	-1166
0.175483	0.118157	-1168
0.225964	0.137176	-1168
0.213081	0.134056	-1172
0.192927	0.215012	-1172
0.223369	0.118348	-1172
0.198363	0.124007	-1174
0.217054	0.117937	-1176
0.300772	0.0925393	-1176
0.144161	0.123405	-1176
0.0771366	0.0870341	-1176
0.163747	0.202226	-1180
0.227689	0.199407	-1186
0.139022	0.0600144	-1184
0.0871281	0.0912988	-1190
0.132198	0.0496132	-1200
0.174141	0.13159	-1202
0.218155	0.092209	-1202
0.267303	0.122752	-1200
0.113105	0.129043	-1202
0.247275	0.139569	-1196
0.189357	0.155849	-1198
0.146353	0.0780936	-1198
0.20757	0.126349	-1190
0.284068	0.161993	-1192
0.217139	0.214344	-1192
0.18813	0.109371	-1186
-0.145297	-0.203275	-1170
-0.166341	-0.120256	-1194
0.204715	0.160225	-694
0.0876242	0.236667	-694
0.221147	0.165814	-692
0.291357	0.0799953	-690
0.119259	0.0732045	-692
0.196279	0.142849	-686
0.119585	0.194677	-686
0.132995	0.104998	-686
0.109792	0.104558	-688
0.20062	0.15246	-680
0.23518	0.157361	-680
0.174687	0.202596	-682
0.283673	0.0412064	-680
0.264216	0.13345	-676
0.232552	0.132989	-686
0.176001	0.123216	-688
0.102132	0.233759	-672
0.160548	0.108404	-680
0.164045	0.019801	-672
0.236763	0.0543558	-670
0.17603	0.0995912	-668
0.136611	0.115715	-666
0.140755	0.0869326	-668
0.201843	0.139911	-670
0.199694	0.119231	-662
0.177152	0.165683	-662
0.300306	0.0778123	-660
0.195402	0.0726917	-674
0.224106	0.121883	-676
0.221013	0.0838486	-660
0.159268	0.163045	-668
0.252715	0.055147	-680
0.269923	0.00672488	-662
0.249079	-0.0603261	-662
0.204768	-0.175565	-662
0.175656	-0.172613	-662
0.240441	-0.011025	-662
0.276014	-0.0782152	-662
0.221027	-0.261692	-662
0.105921	-0.0510153	-662
0.223065	-0.141713	-662
0.196107	-0.106162	-662
0.194274	-0.231935	-662
0.172572	-0.256359	-662
0.224423	-0.266556	-662
0.221813	-0.254381	-662
0.185008	-0.158269	-662
0.238552	-0.245502	-662
0.161757	-0.0615056	-662
0.376367	-0.134549	-662
0.242015	-0.148658	-662
0.236513	-0.212317	-662
0.218408	-0.240689	-662
0.215032	-0.251971	-662
0.110286	-0.0336464	-662
0.299078	-0.0300349	-662
0.241247	-0.0183286	-662
0.284901	-0.0118015	-662
0.299457	-0.0151127	-662
0.135748	-0.143193	-662
0.203109	-0.280079	-662
0.211507	-0.299543	-662
0.274302	-0.295089	-662
0.155067	-0.284489	-662
0.27729	-0.294166	-662
-0.157134	-0.150233	-650
-0.0950917	-0.0817608	-666
-0.0731545	-0.002835	-678
0.0995233	-0.0534181	-672
0.0954658	-0.000212442	-674
0.29727	0.2168	-664
0.158148	0.191959	-208
0.191729	0.137308	-208
0.173642	0.137288	-242
0.279852	0.188348	-240
0.0650858	0.169676	-236
0.243677	0.184995	-236
0.159412	0.143871	-234
0.203679	0.130017	-228
0.214203	0.148893	-228
0.168367	0.146242	-228
0.238753	0.199373	-230
0.0710863	0.130555	-228
0.186115	0.133063	-224
0.265293	0.167816	-220
0.244591	0.137615	-212
0.202624	0.134024	-216
0.16852	0.178773	-208
0.0937122	0.171128	-232
0.100063	0.128709	-240
0.192171	0.0975809	-228
0.152407	0.109731	-226
0.298321	0.0196525	-222
0.281736	0.0165792	-224
0.164753	-0.00278024	-220
0.260876	-0.0362044	-216
0.225676	-0.0539353	-222
0.0886002	0.0608586	-224
0.312839	0.0474208	-216
0.200852	0.0323339	-214
0.24055	0.113506	-208
0.229641	0.120504	-208
0.237027	-0.0459898	-212
0.287675	-0.0294583	-210
0.355294	0.0892538	-210
0.139924	0.0877547	-218
0.209421	0.119257	-238
0.282472	-0.059046	-224
0.263836	-0.0474821	-224
0.223544	0.0656014	-226
0.247835	0.0891175	-214
0.207177	0.0808313	-214
0.234392	-0.197111	-208
0.208269	-0.240116	-214
0.22495	-0.239789	-216
0.249292	-0.231284	-216
0.233042	-0.203768	-218
0.216097	-0.151748	-222
0.239047	-0.0884702	-220
0.245033	-0.260947	-232
0.377022	-0.109779	-232
0.205994	-0.211366	-224
0.221985	-0.189261	-224
0.263064	-0.258801	-222
0.275253	-0.282085	-210
-0.229864	0.244797	-242
-0.204126	-0.0249063	-210
-0.161154	0.00708007	-210
-0.105683	-0.166712	-218
-0.146894	-0.106201	-216
0.327928	-0.123151	272
0.23801	-0.167306	270
0.302484	-0.129405	268
0.239574	-0.0103578	270
0.208974	-0.225727	270
0.202438	0.00880654	262
0.233406	-0.196755	258
0.215669	-0.066672	256
0.233428	-0.0194147	252
0.226557	-0.214075	250
0.236663	-0.0381209	250
0.24513	-0.134486	244
0.271729	-0.128538	246
0.273629	-0.09289	246
0.279052	-0.0762724	248
0.215025	-0.137228	242
0.236073	-0.126479	242
0.289989	-0.122143	242
0.179916	0.141973	238
0.191965	0.166585	238
0.328471	0.154414	238
0.221267	0.165217	238
0.157543	0.136965	238
0.295853	0.0314397	238
0.106358	0.155745	238
0.288647	0.156783	238
0.229101	0.16013	238
0.378182	0.107071	246
0.197803	0.198007	246
0.22346	0.223596	246
-0.243321	-0.13291	248
-0.0932923	-0.144899	248
-0.115383	0.0208743	250
-0.0352201	0.0489306	250
-0.211438	-0.0509521	264
-0.149151	-0.0475077	266
-0.248931	0.220742	752
-0.233954	0.0394692	730
-0.156327	-0.0688467	728
0.135377	0.111598	726
0.247546	0.0550075	732
0.179721	0.205862	738
0.320165	0.0362903	752
0.249148	0.099382	754
0.261783	0.0445595	748
0.349384	-0.138557	724
0.324549	-0.135117	730
0.362523	-0.0768899	742
0.332857	-0.0739096	752
0.323036	-0.03529	754
0.275337	-0.0483482	758
0.331038	0.00601526	742
0.319246	0.0154972	746
0.377218	0.00778897	1226
0.35746	-0.119288	1212
0.29585	-0.236138	1208
0.411279	-0.035467	1200
0.366112	-0.102999	1206
-0.131378	-0.166773	-5018
-0.0560551	-0.0666303	-4528
-0.0993942	-0.055824	-4526
-0.250013	0.0154264	-4536
0.0385256	0.0300024	-4560
-0.0487704	-0.200479	-4532
0.0261356	0.00804977	-4554
0.212663	0.137626	-4538
0.0817703	0.0855147	-4536
0.216756	0.0600048	-4544
0.265801	0.147971	-4554
0.269983	0.159275	-4046
0.180909	-0.0224432	-4058
0.147743	0.109639	-4060
0.312079	0.0622716	-4058
0.0776564	-0.114677	-4070
-0.0706504	-0.0900163	-4056
-0.113881	-0.17859	-4056
-0.171601	-0.0990996	-3566
-0.0865637	-0.124902	-3568
-0.144064	-0.0793078	-3568
0.0646634	0.0348578	-3564
0.112998	-0.0705086	-3574
-0.0338583	0.00107432	-3584
-0.0732096	-0.0683472	-3590
-0.151325	0.00152195	-3598
-0.0737836	-0.0534346	-3600
0.223106	0.035702	-3564
0.319018	0.0386052	-3566
0.238228	0.048127	-3568
0.340749	-0.114556	-3576
0.356269	-0.0231426	-3588
0.167119	-0.115355	-3590
0.206412	-0.158967	-3600
0.259195	0.0457098	-3592
0.272386	0.123189	-3582
0.0794919	0.109709	-3584
0.221964	0.137986	-3588
0.311842	0.171578	-3588
0.288376	0.14951	-3596
0.182991	0.104439	-3602
0.261361	0.0788858	-3600
0.0830474	0.170222	-3604
0.138904	0.116743	-3610
-0.134226	-0.0263126	-3092
-0.239262	0.202909	-3098
-0.0557162	-0.0743883	-3096
-0.120838	-0.0642237	-3098
0.160923	0.074395	-3104
0.0407899	0.00539385	-3110
0.0758385	0.115522	-3118
-0.305952	-0.0712457	-3118
0.252393	0.0232974	-3088
0.197614	-0.0430235	-3090
0.379144	0.00077055	-3092
0.251664	0.0190024	-3094
0.200445	-0.302873	-3094
0.255083	-0.00406717	-3100
0.292803	-0.141373	-3118
0.230414	0.122303	-3114
0.239403	0.15541	-3114
0.22099	0.156422	-3114
0.276479	0.0703211	-3114
0.298685	0.0479617	-3114
0.292441	0.077839	-3114
0.280867	0.0956487	-3114
0.19971	0.104299	-3114
-0.142011	-0.103096	-2608
-0.127674	-0.14376	-2608
0.0081091	-0.056574	-2610
-0.0634811	-0.105291	-2610
-0.0529062	-0.0853825	-2612
-0.182112	-0.131261	-2620
-0.0338218	-0.0933178	-2628
-0.0913291	-0.0174623	-2630
-0.0734077	-0.136185	-2632
-0.117906	-0.121099	-2632
-0.257064	0.0221591	-2632
-0.274286	-0.0385472	-2634
-0.11443	-0.148143	-2642
0.0250772	0.0091036	-2628
0.0645487	0.124886	-2624
-0.0938775	0.135527	-2610
0.171213	-0.351739	-2622
-0.255672	0.219341	-2126
-0.0649912	-0.0739857	-2136
-0.168045	-0.0906987	-2142
-0.126452	-0.0728645	-2144
-0.161977	-0.147401	-2148
-0.131643	-0.1761	-2142
-0.164849	-0.137684	-2152
-0.114957	-0.120368	-2158
-0.106036	-0.150902	-2164
-0.112257	-0.141205	-2136
0.270348	0.0879186	-2136
0.213608	0.130144	-2138
0.214052	0.0967833	-2142
0.289687	0.0400351	-2142
0.268833	0.0497915	-2146
0.30031	0.111378	-2146
0.143697	0.0727399	-2138
0.163632	0.111051	-2138
0.190952	0.130229	-2140
0.328868	0.0815849	-2142
0.345048	0.0610165	-2140
0.168573	-0.0497194	-2138
0.133779	0.0280233	-2136
0.29361	0.218921	-2150
0.0848479	0.248892	-2148
0.244918	0.080621	-2146
0.158744	0.068242	-2148
0.275852	0.11069	-2150
0.222064	0.155839	-2154
0.269757	0.162186	-2154
0.22256	0.0971373	-2156
0.0811137	0.146004	-2156
0.104616	0.122748	-2160
0.0983799	0.144031	-2162
0.172245	-0.0375043	-2164
0.0284428	0.0235123	-2154
0.292017	0.0541189	-2150
0.309251	0.0690354	-2154
0.272708	-0.0842469	-2158
0.172991	0.150469	-2162
0.215619	0.136241	-2162
0.291077	0.101734	-2164
0.288152	0.0459099	-2166
0.125073	0.0494637	-2170
0.203058	0.00723858	-2170
0.106689	0.0768378	-2170
0.231433	-0.178558	-2136
0.295683	-0.0941278	-2136
0.271993	-0.173542	-2136
0.0587334	0.0346552	-1648
-0.0678526	-0.128335	-1686
0.0418476	0.0852343	-1676
-0.163387	-0.0763979	-1674
-0.0390674	-0.0825803	-1674
-0.177927	-0.151285	-1674
-0.0934184	-0.152274	-1670
-0.184785	-0.0897829	-1668
-0.141096	-0.187873	-1668
-0.117307	-0.13296	-1666
-0.114607	-0.122359	-1666
-0.295284	-0.00757076	-1660
-0.182424	-0.186569	-1662
-0.09251	-0.166357	-1658
-0.114901	-0.144282	-1656
0.221861	0.057797	-1686
0.181581	0.179735	-1682
0.261023	0.191961	-1682
0.321309	-0.000828411	-1676
0.248156	0.00419575	-1674
0.189777	0.188395	-1676
0.123946	0.155557	-1684
0.212547	0.154307	-1682
0.227806	0.0870906	-1678
0.231809	0.0842525	-1678
0.308337	0.18077	-1672
0.207915	0.0531948	-1670
0.223279	0.0317558	-1666
0.146042	0.0710516	-1670
0.111896	0.160597	-1666
0.0913919	0.156585	-1662
0.204341	0.182504	-1662
0.215911	0.160413	-1664
0.29743	0.214865	-1664
0.130359	0.0688349	-1662
0.198207	0.0635882	-1662
0.101569	0.0305592	-1658
0.0700388	0.0513385	-1664
0.264288	0.0587789	-1658
0.220533	0.12845	-1658
0.183902	0.0322237	-1654
0.149461	0.0810309	-1652
0.374392	0.155013	-1648
0.269524	0.14824	-1648
0.214239	0.186462	-1650
0.227701	0.192245	-1652
0.2136	0.214029	-1652
0.148278	0.0306359	-1658
0.212672	0.20125	-1656
0.0505625	0.143131	-1646
0.0586535	0.106213	-1682
0.185274	-0.140853	-1680
0.17618	-0.0775178	-1668
0.181616	-0.0663113	-1660
0.222246	-0.111797	-1660
0.278433	-0.227644	-1652
0.374966	-0.267416	-1652
0.155168	-0.100944	-1172
0.24383	-0.0251332	-1176
0.287412	-0.117342	-1176
0.231862	-0.00631267	-1182
0.0297031	0.0117372	-1182
0.211834	-0.103131	-1186
0.253766	-0.0241203	-1186
0.193073	0.0041693	-1190
0.154323	-0.004206	-1188
0.11934	-0.0793194	-1190
0.0809582	-0.108013	-1194
0.225587	-0.0155321	-1196
0.240793	0.00388302	-1192
0.116389	-0.0967453	-1192
0.267952	0.00979198	-1202
0.178787	0.0263664	-1202
0.161871	0.0330681	-1200
0.129604	-0.0744454	-1200
0.0353551	0.00111573	-1200
0.0896625	0.0202005	-1174
0.0830501	0.0109884	-1168
0.0778154	0.28407	-1166
0.0767192	0.168842	-1166
0.105829	0.0798479	-1168
0.114795	0.0699018	-1168
0.314465	0.0868359	-1166
0.169057	0.178047	-1168
0.128849	0.150998	-1168
0.23323	0.190209	-1172
0.196135	0.190444	-1174
0.220312	0.205521	-1174
0.256728	0.148054	-1178
0.248305	0.149559	-1178
0.0953547	0.192346	-1178
0.218311	0.150594	-1174
0.251881	0.0685291	-1176
0.302029	0.125578	-1176
0.187436	0.0590528	-1180
0.168106	0.121967	-1176
0.281337	0.214983	-1182
0.18901	0.201558	-1188
0.302708	0.0433886	-1186
0.0340276	0.0653508	-1190
0.12984	0.185189	-1192
0.111873	0.224672	-1192
0.0732999	0.166904	-1196
0.0674568	0.197227	-1198
0.26142	0.171888	-1202
0.227935	0.209397	-1200
0.222379	0.223968	-1200
0.141355	0.0769191	-1202
0.237293	0.12916	-1196
0.231178	0.163704	-1190
0.107956	0.0694907	-1182
0.0795402	0.0686099	-1180
0.261656	0.187251	-1170
0.145861	0.058884	-1174
0.11485	0.0391752	-1190
-0.157195	-0.147261	-1170
-0.0890892	-0.178949	-1172
-0.0729982	0.217934	-1174
-0.12721	-0.150095	-1174
-0.0753565	-0.137102	-1178
-0.0821148	-0.126804	-1182
-0.139319	-0.160958	-1184
-0.0776646	-0.164151	-1186
-0.0968431	-0.177511	-1188
-0.228126	-0.0447759	-1186
-0.197262	0.0207437	-1188
-0.137403	-0.102926	-1192
-0.0954955	0.000990942	-1200
-0.24832	0.12331	-1200
-0.107277	-0.180006	-1202
-0.160921	-0.136956	-1204
-0.129639	-0.111749	-1202
-0.176197	-0.0750547	-1182
0.131873	0.226463	-694
0.0978351	0.193505	-692
0.0683248	0.208186	-692
0.240369	0.067659	-694
0.27433	0.16117	-690
0.213967	0.110411	-690
0.230197	0.0820318	-688
0.0975809	0.203102	-686
0.142995	0.0385692	-682
0.200097	0.181623	-682
0.18556	0.019867	-680
0.304143	0.0992323	-676
0.295654	0.120623	-676
0.0886841	0.165045	-676
0.16452	0.0275588	-684
0.157455	0.0722082	-684
0.17146	0.0833284	-682
0.104271	0.0731605	-688
0.243842	0.185447	-692
0.230926	0.268482	-690
0.161421	0.1804	-688
0.230562	0.17544	-684
0.22353	0.19056	-682
0.0571356	0.0748674	-684
0.138554	0.293316	-676
0.145633	0.242015	-674
0.133542	0.246777	-676
0.108123	0.0890497	-676
0.17779	0.0475357	-672
0.213593	0.0243868	-672
0.226111	0.065769	-670
0.122933	0.0366645	-668
0.236657	0.135955	-672
0.250954	0.106089	-670
0.237185	0.10162	-668
0.223329	0.160284	-668
0.242163	0.176583	-664
0.18357	0.0652782	-662
0.161071	0.0796071	-664
0.111509	0.0875773	-662
0.0867274	0.182759	-660
0.0782671	0.184216	-660
0.124506	0.13082	-664
0.0761856	0.297184	-666
0.2266	0.248901	-662
0.0745837	0.0405837	-678
0.0465171	0.0608023	-676
0.0849864	0.0335951	-672
0.23294	0.205351	-672
0.134458	0.0976207	-680
0.166083	-0.0167316	-662
0.112746	-0.239788	-662
0.217008	-0.0811308	-662
0.142266	-0.253707	-662
0.190999	-0.0108712	-662
0.178898	-0.0593225	-662
0.168496	-0.0313388	-662
0.330075	-0.103628	-662
0.202102	-0.272409	-662
0.269036	-0.2314	-662
0.225804	-0.102119	-662
0.201162	-0.00687872	-662
0.251592	-0.310385	-662
-0.054186	0.135589	-664
-0.0554618	0.157222	-676
-0.164894	-0.152182	-648
0.0354334	-0.0624579	-648
-0.105442	-0.193681	-652
-0.140803	-0.115561	-652
-0.0526705	-0.100873	-654
-0.108046	-0.127004	-654
-0.10831	-0.0856507	-656
-0.15615	-0.0970126	-658
-0.0934419	-0.0602749	-660
-0.163512	-0.0858118	-662
-0.109264	-0.158745	-664
-0.124103	-0.210083	-672
-0.1116	-0.139838	-668
-0.139527	-0.129985	-670
-0.124237	-0.103327	-676
-0.102804	-0.122498	-648
0.0558071	-0.00641721	-662
0.285438	0.222859	-686
0.302335	0.265655	-682
0.312215	0.175631	-672
0.399067	-0.0961629	-660
0.045719	0.238726	-206
0.0710558	0.174167	-212
0.0821175	0.172763	-212
0.0692181	0.283073	-208
0.0985908	0.223468	-208
0.118262	0.219489	-206
0.16886	0.19692	-242
0.23787	0.204559	-242
0.248211	0.236627	-242
0.123222	0.160327	-240
0.0720965	0.189963	-234
0.233677	0.176736	-238
0.181886	0.149322	-236
0.144934	0.251114	-230
0.288051	0.265676	-228
0.27176	0.212852	-228
0.162336	0.226147	-230
0.190658	0.165124	-226
0.132532	0.159394	-224
0.0921131	0.197765	-224
0.272121	0.200831	-216
0.21735	0.16398	-210
0.303072	0.140756	-208
0.310454	0.13016	-210
0.325546	0.146678	-220
0.349238	0.166276	-234
0.353649	0.137049	-238
0.310261	0.157267	-240
0.286046	0.123291	-240
0.235849	0.0149983	-242
0.142675	0.0520818	-242
0.208989	0.0866303	-240
0.161042	0.105165	-242
0.070005	0.017833	-240
0.0450134	0.0156661	-238
0.209035	0.024109	-238
0.197953	-0.0463441	-236
0.181764	0.0353595	-234
0.261024	0.075414	-234
0.146746	0.0810562	-236
0.246043	0.0577036	-236
0.282807	0.107462	-236
0.130862	0.0566405	-232
0.043861	0.0415877	-236
0.288071	0.0534923	-236
0.284883	0.0638569	-228
0.268801	-0.00142419	-228
0.216584	-0.0472368	-228
0.207208	0.0366133	-230
0.186044	0.0835503	-228
0.158554	0.0850358	-230
0.227437	0.0189506	-224
0.283061	0.0751346	-224
0.270557	0.084879	-220
0.226793	-0.0264872	-220
0.0588773	0.00958773	-220
0.104769	0.00781601	-220
0.185211	-0.0207496	-218
0.204964	0.00093356	-216
0.241753	0.0201908	-216
0.22264	0.0588961	-216
0.241043	0.0586099	-218
0.188125	0.0359796	-222
0.209467	0.0567428	-222
0.201471	0.114671	-224
0.179896	0.106106	-224
0.166565	0.00484497	-214
0.169926	0.072552	-212
0.125821	0.111523	-212
0.196511	0.0603884	-210
0.310971	0.118474	-208
0.0343375	0.0183986	-208
0.00524403	0.0372675	-208
0.278091	0.0306031	-212
0.299737	-0.156177	-218
0.216305	-0.123905	-236
0.238728	-0.275782	-242
0.0588367	0.0678296	-216
0.0290985	0.0333356	-226
0.0889505	-0.141922	-228
0.290564	-0.254835	-224
-0.316449	0.244497	-208
-0.3248	0.256606	-224
-0.231666	0.27215	-242
-0.227905	-0.0331312	-226
-0.180541	0.079448	-210
-0.138101	-0.0306303	-210
-0.130634	-0.147087	-210
-0.086996	-0.0992164	-216
-0.119729	-0.0822555	-216
-0.151356	-0.136845	-216
-0.129593	-0.130262	-218
-0.130654	-0.118044	-218
-0.0478308	-0.0725997	-220
-0.157301	-0.126576	-224
-0.050765	-0.0315162	-224
-0.0751576	-0.0517342	-224
-0.106383	-0.112702	-232
-0.136583	-0.129915	-232
-0.137629	-0.141785	-232
-0.0870113	-0.0792027	-236
-0.117321	-0.0745746	246
-0.171907	-0.0713195	248
-0.121498	-0.123933	248
-0.146601	-0.0539507	246
-0.0722231	0.022279	248
-0.102515	-0.0584029	252
-0.11904	-0.11148	260
-0.16584	-0.0219125	262
-0.159049	-0.136037	262
-0.171747	-0.12149	264
-0.212587	-0.173016	266
0.264523	-0.216401	264
0.238734	-0.0710325	256
0.307588	-0.0218148	248
0.375426	0.0204529	244
0.309371	-0.144062	242
0.204945	-0.106173	250
0.0922546	0.00271158	248
0.0110482	-0.0316596	250
-0.0344804	-0.0390798	250
0.105644	0.0496391	238
0.205206	0.0720341	238
0.237371	0.0751792	238
0.242959	0.186263	238
0.12847	0.12651	238
0.100573	0.159611	238
0.199378	0.145003	238
0.259324	0.178018	238
0.267493	0.146102	238
0.233311	0.171013	238
0.232789	0.188541	238
0.268839	0.181218	238
0.15716	0.0327772	238
0.128598	0.0529675	238
0.163834	0.0593617	238
0.123111	0.0891769	238
0.178916	0.0696767	238
0.183125	0.0995774	238
0.2109	0.110851	238
0.148278	0.111376	238
0.326294	0.12414	238
0.237387	0.0933542	238
0.187484	0.131603	238
0.140763	0.166762	238
0.22818	0.179337	238
0.266178	0.185585	238
0.309041	0.101935	238
0.352999	0.114253	238
0.335906	0.160307	238
0.0917224	0.179459	238
0.145319	0.255212	246
0.0873212	0.264306	246
0.142637	0.241618	246
0.0773427	0.208682	246
-0.33879	0.17629	246
-0.297067	0.0948138	246
-0.214024	0.155079	246
-0.344543	0.0804131	246
-0.0808072	-0.134358	272
-0.10839	-0.0616519	264
-0.227209	0.25497	732
-0.330298	0.155815	734
-0.182235	-0.0490402	760
-0.1608	-0.061379	760
-0.0742965	-0.103719	758
-0.166231	-0.158726	744
-0.230968	-0.107274	742
-0.282841	-0.156657	740
-0.216074	-0.204272	734
-0.0839512	-0.0708335	732
-0.134644	-0.150142	722
0.134165	0.211932	730
0.283926	0.229334	734
0.339002	0.045827	730
0.242071	0.256718	742
0.255383	0.186096	742
0.254438	0.204204	742
0.187608	0.0616667	742
0.334069	0.0238761	738
0.110944	0.136035	744
0.370449	0.138673	744
0.158299	0.0283087	740
0.227331	0.174758	750
0.30007	0.0442101	754
0.298073	0.073848	756
0.276351	-0.0322824	722
0.297128	-0.0187378	724
0.186287	-0.00913937	732
0.352339	-0.0289938	754
0.272714	-0.0540278	752
0.227139	-0.110488	758
0.329546	0.0214483	1216
-0.0363688	0.19863	1232
0.288066	0.18919	1228
0.25978	0.188533	1224
-0.159961	-0.162001	1230
-0.169271	-0.150505	1228
-0.32951	-0.165823	1212
-0.143007	-0.11072	1210
-0.226639	-0.0528718	1204
-0.344157	-0.158279	1204
-0.151236	-0.110024	1202
-0.0844639	-0.017657	1200
-0.271003	-0.108801	1200
-0.213219	-0.0659502	1204
0.294149	0.057565	1230
0.311088	0.0143167	1228
0.258963	-0.106898	1216
0.301034	-0.153249	1216
0.318068	0.000397475	1196
0.0846683	0.0270206	1194
0.278253	-0.117064	1196

## Sheet: Sheet2
0.336064	-0.208784	-210
0.331714	-0.114187	-218
0.372478	-0.179816	-220
0.326414	-0.187543	-226
0.346421	-0.20094	-242
0.34605	-0.178889	-242
0.326119	-0.0984476	266
0.321126	-0.267743	-680
0.303706	-0.218507	-662
0.353233	-0.23401	-218
0.325759	-0.270964	-218
0.337887	-0.230262	-222
