# Supplementary material for: Spinal premotor interneurons controlling antagonistic muscles are spatially intermingled
Source: eLife. 2022 Dec 13;11:e81976. doi: 10.7554/eLife.81976 (PMC9844990; doi:10.7554/eLife.81976)
Supplement: Figure 12—figure supplement 10—source data 1. — The x-y coordinates are normalized (between –0.5 and 0.5) and scaled to an idealized spinal cord of dimensions 1700 μm and 900 μm in the mediolateral and dorsoventral directions respectively, while z coordinates are in micron, with the axis origin taken at the border between L4 and L5 and negative values in the rostral direction. [file elife-81976-fig12-figsupp10-data1.xlsx]

## Sheet: Sheet1
-0.15684	-0.0881564	-4022
0.126149	0.0390968	-3548
0.28954	0.00880386	-3552
-0.0998691	-0.0193359	-3532
0.22176	0.174057	-3040
0.211701	-0.0162965	-3038
0.254446	0.0243072	-3042
0.331489	-0.0153868	-3054
0.239243	0.172998	-2558
0.182393	0.144033	-2560
0.229665	0.107791	-2562
0.206823	-0.0403502	-2580
0.324183	0.0419696	-2580
0.258524	-0.0877083	-2580
0.239534	-0.155899	-2580
-0.114861	-0.0375091	-2094
-0.303533	-0.0104793	-2110
0.211657	0.122055	-2092
0.245496	0.210971	-2102
0.229525	0.112929	-2100
0.189742	0.162086	-2114
0.181832	0.144398	-2114
0.365202	0.0613216	-2112
0.306719	-0.0403319	-2092
0.280739	-0.0716153	-2092
0.336961	-0.0845772	-2102
0.305829	-0.0294659	-2108
0.142323	0.155587	-1612
0.259733	0.159202	-1610
0.172715	0.132151	-1620
0.12197	0.0610956	-1634
0.121217	0.115219	-1632
0.215885	0.0661058	-1640
0.255253	-0.25801	-1638
0.262793	-0.0711009	-1628
0.239333	-0.141945	-1628
0.252123	-0.15647	-1622
0.311476	-0.0343545	-1620
0.321643	-0.167238	-1618
0.29086	-0.198823	-1608
0.365573	-0.173402	-1604
-0.199544	-0.0654192	-1616
-0.202453	-0.176594	-1626
-0.152993	-0.123378	-1138
-0.193403	-0.131814	-1162
0.28211	0.0224047	-1166
0.198924	0.050816	-1164
0.0886733	0.0361747	-1166
0.18919	0.205495	-1154
0.230485	0.141419	-1150
0.177085	0.137467	-1150
0.140871	0.0639556	-1166
0.155285	0.116408	-1144
0.318696	-0.0527214	-1144
0.0775203	0.169866	-1136
0.191794	0.161756	-1134
0.215002	0.129066	-1136
0.12442	0.168194	-1138
0.232194	0.147872	-1138
0.279755	0.0643665	-1140
0.264417	0.129385	-1132
0.230262	0.150755	-1142
0.193536	0.207132	-1160
0.368379	-0.22603	-1132
0.231965	-0.267262	-1134
0.194794	-0.247528	-1140
0.257316	-0.300207	-1142
0.304744	-0.145945	-1146
0.210962	-0.14353	-1146
0.220417	-0.143955	-1152
0.202458	-0.184677	-1168
0.204166	-0.22773	-1170
0.225877	-0.200792	-1172
0.28925	-0.329801	-1164
0.209231	-0.237725	-1158
0.237392	-0.155281	-1154
0.328074	-0.147518	-1154
0.341058	-0.0950374	-1158
0.288443	-0.0995566	-1166
0.24187	0.0465325	-660
0.189045	0.0181031	-666
0.206002	-0.17581	-666
0.36549	0.01515	-668
0.262983	-0.250548	-670
0.21996	-0.213554	-670
0.225087	-0.20137	-670
0.236774	-0.171262	-670
0.213496	-0.181921	-678
0.252464	-0.238498	-680
0.186875	-0.209492	-686
0.203483	-0.186162	-690
0.239768	-0.143889	-692
0.281007	-0.0727775	-692
0.241696	0.00524003	-664
0.153605	0.0610483	-664
0.0929754	0.0704585	-664
0.278984	0.0747633	-664
0.178114	0.0819251	-664
0.22937	0.1194	-662
0.166771	0.162268	-664
0.169216	0.110681	-666
0.211954	0.129822	-668
0.225235	0.145171	-670
0.086802	0.226154	-672
0.158796	0.180839	-672
0.239636	0.174593	-676
0.271612	0.172991	-672
0.173673	0.0963768	-674
0.142331	0.138259	-682
0.185792	0.139719	-680
0.226006	0.172793	-682
0.216179	0.177021	-692
0.12765	0.238312	-692
0.214536	0.100585	-684
0.210106	0.185509	-682
0.20285	0.151378	-694
0.17269	0.139668	-696
0.0954468	0.214322	-698
0.0782153	0.109105	-694
0.0968568	0.116581	-690
0.190909	0.105672	-686
0.246195	0.148726	-698
0.203404	0.13635	-700
0.100648	0.180884	-700
-0.0892259	-0.0675438	-672
-0.104915	0.00388838	-682
-0.120077	-0.0468848	-688
0.3699	-0.159276	-664
0.281234	-0.245212	-668
0.264144	-0.0734347	-204
-0.00784877	-0.0527091	-176
0.1095	-0.0831771	-180
0.230727	-0.296629	-172
0.186605	-0.18058	-184
0.221814	-0.292611	-186
0.204278	-0.269855	-188
0.20717	-0.229236	-190
0.330115	-0.260535	-198
0.182198	-0.212253	-200
-0.177257	-0.200904	-164
-0.138595	0.24724	-172
0.222684	0.110134	-164
0.135724	0.0993063	-168
0.093394	0.0203519	-172
0.0758679	0.12197	-174
0.220017	0.13583	-170
0.321674	0.0463505	-174
0.294758	0.119552	-174
0.12022	0.0571997	-178
0.198855	0.0913615	-180
0.216962	0.106116	-186
0.140853	0.119165	-188
0.120142	0.0960072	-192
0.156829	0.142386	-194
0.207599	0.134519	-198
0.25672	0.116239	-200
0.252423	0.173093	-200
0.145108	0.0919678	-202
0.251957	0.131001	-194
0.276383	0.149167	-186
0.213038	0.15186	-180
0.262525	0.181539	-202
0.165495	0.190273	-190
0.262216	0.191204	-184
0.253838	0.182878	-186
0.204173	0.256137	-186
0.291777	0.187164	-182
0.194679	0.207199	-182
0.163331	0.2276	-170
0.237113	0.050418	-190
0.263231	-0.16463	290
0.22561	-0.134309	306
0.213146	-0.212005	306
0.204255	-0.129136	308
0.182524	-0.00484109	302
0.372318	-0.254758	298
0.282098	-0.151714	296
0.249733	-0.146581	290
0.0866981	0.0384166	292
0.0491598	0.0565922	292
0.203874	0.0838259	284
0.248915	0.177101	298
0.157229	0.189825	296
0.188417	0.182613	292
0.186529	0.151442	290
0.174358	0.158952	284
0.120333	0.173522	284
0.235067	0.162392	280
0.160139	0.191552	290
0.107992	0.184944	276
0.121228	0.151575	274
0.242261	0.177938	304
0.266856	0.150917	302
0.362815	-0.0996573	284
0.17307	-0.249184	764
0.262472	-0.189383	760
0.182675	-0.206076	754
0.0748198	0.0106233	762
0.315416	-0.109312	778
0.3203	-0.180569	784
0.285116	-0.125869	782
0.229646	-0.251478	790
0.214959	0.163037	782
0.200889	0.0867754	772
0.0793429	0.145299	772
0.201541	0.11289	758
0.0574727	0.0484877	758
0.361268	-0.17166	1260
0.196527	0.0951935	1262
0.269523	-0.0362047	1270
0.361284	-0.0257723	1746
0.316652	0.0875855	1738
0.163412	0.0108967	-4000
0.0434029	-0.0194548	-3998
-0.045999	-0.0845768	-4022
0.222834	0.102941	-4028
0.26835	0.0117715	-3542
-0.118391	-0.133914	-3568
-0.135604	-0.100441	-3542
-0.188214	-0.0447701	-3540
0.0949224	0.0821592	-3050
-0.0521589	0.0397715	-3050
-0.151161	-0.0832381	-3068
-0.098033	-0.132931	-3066
0.18864	0.23551	-2554
0.28345	0.165955	-2558
0.169911	0.109199	-2560
0.138657	0.138687	-2570
0.276359	0.120676	-2590
0.178702	-0.060299	-2580
0.285702	0.00215682	-2580
-0.160184	-0.0671301	-2614
-0.0514157	-0.114552	-2616
-0.13947	-0.156104	-2618
-0.103308	-0.142975	-2092
-0.135481	-0.181954	-2096
-0.157182	-0.103587	-2110
-0.192917	0.247954	-2104
0.225061	0.169557	-2084
0.339227	0.176602	-2086
0.285879	0.189579	-2088
0.104857	0.135798	-2086
0.0397421	0.0772997	-2090
0.286093	0.154708	-2092
0.239147	0.216996	-2092
0.233902	0.0890241	-2094
0.249219	0.0791944	-2118
0.282555	0.0144081	-2096
0.17524	0.00026295	-2100
0.175003	-0.00823653	-2108
0.327848	-0.0601537	-2108
0.279027	-0.0448872	-2124
0.180542	0.0174707	-2122
0.0581936	0.0327373	-2088
0.0692841	0.0280738	-2094
0.292823	-0.229231	-1646
0.204573	-0.140089	-1622
0.321492	-0.0588923	-1626
-0.14508	-0.174987	-1582
-0.157794	-0.239704	-1594
-0.119903	-0.185294	-1602
-0.156065	0.00366709	-1602
-0.119453	-0.0867124	-1612
-0.122765	-0.111348	-1626
-0.118864	-0.197148	-1642
0.198598	0.244518	-1594
0.22162	0.236399	-1590
0.22235	0.182668	-1590
0.194224	0.114442	-1592
0.225469	0.176715	-1596
0.26333	0.0751453	-1600
0.0821935	0.0556402	-1600
0.0816913	0.176556	-1600
0.068662	0.0298272	-1602
0.245798	0.248034	-1598
0.272715	0.075764	-1610
0.247182	0.118177	-1608
0.0663202	0.122659	-1618
0.0676809	0.162869	-1620
0.272464	0.0655248	-1622
0.307686	0.028469	-1626
0.125393	0.111741	-1628
0.13928	0.080246	-1628
0.249244	0.175741	-1622
0.230929	0.129782	-1618
0.223255	0.140346	-1618
0.1349	0.152826	-1618
0.256842	0.0767977	-1618
0.170075	0.0505697	-1628
0.235987	-0.0146005	-1634
0.136863	0.122402	-1600
0.200917	0.0908096	-1638
-0.282077	0.321286	-1616
-0.133002	-0.163456	-1136
-0.12875	-0.133344	-1140
-0.122249	-0.171261	-1152
0.0895471	0.0193942	-1172
0.16148	0.000701252	-1172
0.289183	0.0459993	-1170
0.1512	0.0701394	-1166
0.243402	-0.0592594	-1162
0.12477	0.12772	-1164
0.128911	0.168265	-1164
0.205725	0.252054	-1162
0.275125	0.258195	-1158
0.177419	0.0152151	-1158
0.229828	0.101462	-1156
0.208335	0.221943	-1154
0.247242	0.192356	-1154
0.0381173	0.0337522	-1152
0.0816721	0.00728877	-1156
0.20248	0.0799782	-1148
0.174692	0.0633677	-1154
0.152096	0.00631835	-1146
0.118632	0.0750269	-1144
0.22251	0.0730507	-1136
0.256709	0.0187851	-1138
0.171236	-0.00449793	-1136
0.293852	0.035941	-1164
0.185645	0.213414	-1162
0.213505	-0.110047	-1136
0.22876	-0.105981	-1140
0.367727	-0.249738	-1142
0.185717	-0.223367	-1150
0.204378	-0.0922678	-1172
0.203398	-0.209929	-1162
0.218837	-0.114743	-1156
0.325683	-0.165215	-654
0.265407	0.0320167	-656
0.153204	0.0377692	-658
0.154656	-0.0134012	-666
0.196655	-0.0642961	-670
0.150479	-0.0717013	-674
0.153442	0.0462762	-672
0.163475	-0.224405	-680
0.161088	-0.000115306	-682
0.180591	0.00102494	-682
0.213686	-0.0487297	-684
0.113164	0.0212035	-698
0.162815	0.0505426	-688
0.187255	0.0340538	-690
0.135027	0.026892	-688
0.0784952	0.03734	-688
0.196946	-0.00777677	-692
0.252886	-0.292244	-662
0.209356	0.0687289	-664
0.132888	0.061029	-664
0.232787	0.076653	-664
0.137747	0.075122	-664
0.0818538	0.0880235	-664
0.221222	0.0717141	-664
0.187424	0.285883	-662
0.226555	0.096569	-666
0.235253	0.261271	-668
0.0782786	0.190012	-674
0.256535	0.154184	-672
0.240603	0.13954	-672
0.203684	0.0939682	-678
0.221929	0.113525	-676
0.249955	0.188	-676
0.238971	0.194329	-676
0.0535799	0.0518558	-680
0.208653	0.211754	-682
0.223482	0.212913	-686
0.223741	0.19613	-690
0.247235	0.142506	-686
0.268618	0.135158	-676
0.154588	0.247505	-696
0.0776449	0.175919	-696
0.106859	0.182671	-698
0.205252	0.2116	-692
-0.157978	-0.209371	-670
-0.137335	-0.153043	-674
-0.0948237	-0.0771847	-680
-0.00637403	0.0366161	-684
0.0426009	0.0220235	-684
-0.13677	-0.132647	-704
-0.0434987	-0.0979975	-706
-0.102317	-0.165022	-696
-0.115461	-0.102885	-698
-0.0776027	-0.123833	-670
0.0709699	0.0130937	-686
-0.058301	-0.0816368	-680
0.286108	-0.211429	-204
0.227137	-0.0833533	-172
0.205807	-0.107893	-184
0.198865	-0.0551905	-184
0.0339415	-0.0250328	-194
0.194836	-0.13951	-196
-0.134047	-0.158304	-200
-0.127005	-0.174651	-194
-0.0788754	-0.163781	-188
-0.0969412	-0.108069	-184
-0.0842406	-0.0848267	-178
-0.208673	-0.0996165	-172
-0.0916493	-0.183562	-172
-0.0816523	-0.0631494	-166
-0.0127687	0.0869133	-164
0.126644	0.0683731	-166
0.186217	0.0487685	-168
0.217214	0.0562057	-168
0.0874367	0.0565441	-168
0.00106886	0.0348668	-168
0.00973499	0.0403302	-168
0.00936822	0.0719543	-170
0.042047	0.0548733	-174
0.0906014	0.180763	-172
0.143305	0.0574534	-170
0.18552	0.0876253	-170
0.283897	-0.0115894	-176
0.158741	0.00615421	-178
0.112492	0.0597022	-174
0.233241	0.0808084	-184
0.167753	0.101675	-188
0.132407	0.0937231	-188
0.102542	0.109211	-198
0.0647864	0.148561	-196
0.152328	0.0462588	-194
0.122127	0.0686974	-192
0.177231	0.0405558	-196
0.228122	0.0407179	-196
0.203251	0.0369958	-200
0.196712	0.063805	-202
0.157651	0.0403231	-202
0.299966	0.0853554	-200
-0.00052395	0.0566004	-202
0.246293	-0.014381	-200
0.233603	-0.0020937	-188
0.133319	0.0346201	-188
0.124333	0.0264074	-188
0.186264	0.0091291	-194
0.182125	0.0648695	-194
0.196025	0.102937	-188
0.304436	0.0276552	-180
0.333022	0.0621555	-180
0.289383	0.231795	-200
0.186715	0.191782	-200
0.0767639	0.231343	-198
0.165165	0.212416	-192
0.211786	0.210886	-184
0.126707	0.195229	-176
0.252051	0.233818	-174
0.357203	-0.29493	-176
0.353559	-0.025268	308
0.181567	0.0226515	306
0.143648	-0.0568247	302
0.199632	-0.0151674	302
0.259899	0.0138725	300
0.230747	-0.248695	298
0.251399	0.0106716	294
0.211588	0.0448249	282
0.218483	0.00486101	282
0.150945	0.014417	282
0.272441	-0.00227777	286
0.0469743	0.0445128	308
0.27024	0.0447253	308
0.249496	0.0657299	304
0.284283	0.0646541	302
0.113386	0.0850345	304
0.235885	0.102314	302
0.196793	0.066042	296
0.112877	0.0782344	292
0.273839	0.0755781	286
0.123085	0.120609	280
0.117639	0.065285	278
0.193369	0.0826704	274
0.230984	0.0881025	278
0.182076	0.0429057	274
0.320947	0.115701	304
0.275063	0.143008	302
0.313378	0.125928	300
0.0912027	0.183463	300
0.0937635	0.143665	294
0.139349	0.250694	282
0.167616	0.167877	282
0.27801	0.249711	286
0.232887	0.25329	284
-0.133487	-0.148739	274
-0.152179	-0.0613935	286
-0.167601	-0.1792	290
-0.099312	-0.175335	292
-0.105976	-0.201035	294
0.304199	-0.0709096	308
0.209755	-0.0294463	766
0.170619	-0.027323	772
0.236888	-0.0993514	784
0.0599292	0.0162627	792
0.220903	0.0182495	786
0.274499	0.0202704	780
-0.142549	-0.136888	760
-0.0435891	-0.0821875	774
-0.114707	-0.165065	780
0.191826	0.0471155	790
0.169065	0.0795658	784
0.252943	0.0850003	780
0.223179	0.0719192	782
0.229006	0.0624087	782
0.215303	0.121124	776
0.23389	0.0401516	774
0.126786	0.173196	770
0.229413	0.237202	760
0.23318	0.0563187	762
0.164484	0.0539155	764
0.0604764	0.212166	760
0.144901	0.287049	772
0.326843	0.0479401	1256
0.229437	-0.0150506	1264
0.205905	0.0890762	1262
0.274832	0.01469	1268
0.137978	-0.0306145	1272
-0.212097	-0.228113	1748
0.282985	0.0401599	1756
0.349058	-0.105494	1744
0.331991	-0.0519407	1730
0.176271	0.0639591	1722

## Sheet: Sheet2
0.282489	-0.223208	302
0.382447	-0.109842	-664
0.369525	-0.138355	-666
0.353054	-0.122193	-666
0.367619	-0.171782	-168
0.358586	-0.112348	-168
0.310084	-0.130099	-174
0.337298	-0.145896	-178
0.336496	-0.0712916	-180
0.32051	-0.0875845	306
