# Supplementary material for: Spinal premotor interneurons controlling antagonistic muscles are spatially intermingled
Source: eLife. 2022 Dec 13;11:e81976. doi: 10.7554/eLife.81976 (PMC9844990; doi:10.7554/eLife.81976)
Supplement: Figure 12—figure supplement 10—source data 2. [file elife-81976-fig12-figsupp10-data2.xlsx]

## Sheet: Sheet1
-0.0855264	-0.0768837	-4552
0.209049	0.0220654	-4550
0.129408	0.000718712	-4048
0.201548	0.0161713	-3576
0.178022	0.0156816	-3070
0.249708	0.197055	-3094
0.112452	0.125191	-2604
0.31631	0.0093381	-2598
0.241639	-0.022025	-2596
0.272061	0.0745277	-2622
0.220059	0.00412067	-2156
0.34597	0.0502903	-2156
0.307156	-0.0571104	-2156
0.33641	-0.0682919	-2156
0.184657	0.208485	-2156
0.225604	0.172158	-2156
0.206988	0.193799	-2156
0.357622	-0.00994075	-2140
0.297753	-0.0814843	-1642
0.295339	-0.0208047	-1642
0.256623	-0.0647623	-1650
0.222963	0.122527	-1650
0.203642	0.116028	-1646
0.157108	-0.0455975	-1666
0.240058	-0.00423111	-1676
0.330461	0.0253799	-1680
0.309016	-0.00300969	-1678
0.187635	0.113336	-1696
0.281655	-0.24004	-1632
0.299	-0.18567	-1664
0.22052	-0.171795	-1666
0.264891	-0.230079	-1704
0.350559	0.0324212	-1148
0.30054	-0.121572	-1148
0.216487	0.1698	-1156
0.231321	0.162583	-1162
0.11683	0.0965507	-1174
0.278888	0.087108	-1176
0.293115	-0.147262	-1182
0.21486	-0.169559	-684
0.284657	-0.0427178	-682
0.205728	-0.0230445	-676
0.267984	-0.00701958	-676
0.250893	-0.117881	-672
0.308746	-0.112505	-670
0.143061	0.00635985	-668
0.310391	-0.244379	-700
0.272728	0.149186	-662
0.28425	0.147279	-662
0.215549	0.130153	-670
0.312122	0.0119016	-678
0.201195	0.117717	-680
0.211368	0.101329	-686
0.183471	0.132798	-688
0.0784607	0.0924223	-698
-0.133391	-0.121556	-676
0.120337	0.0676565	-186
0.144594	0.0578286	-188
0.248876	-0.0133991	-192
0.258616	-0.0395999	-194
0.231986	0.203897	-196
0.265175	0.131742	-200
0.0908888	-0.00804932	-202
0.28421	0.146905	-206
0.221256	0.143067	-208
0.190544	0.123517	-204
0.214956	0.114771	-204
0.179042	0.0917412	-204
0.194248	0.109042	-198
0.192388	0.147756	-198
0.059508	0.103334	-192
0.149682	0.201838	-214
0.111416	0.105253	-214
0.163463	0.215026	-218
0.275045	-0.0214906	-218
0.298493	0.0509392	-218
0.227608	0.112522	-212
0.274159	0.130849	-216
0.241876	0.140571	-222
0.253471	0.136733	-220
0.258502	0.0436069	-226
0.233804	0.038939	-224
0.140786	0.230056	-230
0.0985255	0.157387	-226
0.189098	0.186098	-224
0.266605	0.153092	-234
0.296385	-0.318275	-214
0.316269	-0.362163	-200
0.248218	-0.288595	-198
0.199973	-0.20981	-198
0.263942	-0.326873	-198
-0.15894	-0.163313	-222
-0.121461	-0.129464	-216
-0.0049426	-0.0473469	-188
0.326013	0.0347468	284
0.326582	-0.14701	272
0.209081	-0.21708	272
0.187015	-0.0164812	304
0.216414	-0.109292	286
0.222899	-0.257896	284
0.298751	-0.040374	286
0.309758	0.0143877	282
0.282223	-0.0401703	280
0.247534	-0.0592719	280
0.25344	-0.0573119	276
0.306931	0.0344026	266
0.213661	-0.26769	284
0.314064	0.0110788	288
0.0912546	0.218892	304
0.129786	0.101866	304
0.260499	0.158735	302
0.21962	0.127051	302
0.302894	0.0688192	300
0.274185	0.1732	298
0.243096	0.112839	296
0.191563	0.112917	292
0.237848	0.131014	290
0.137503	0.196369	296
0.228647	0.21264	288
0.0813374	0.102892	288
0.0920231	0.0853777	290
0.257393	0.126075	284
0.142419	0.170798	284
0.231369	0.169133	282
0.166581	0.208446	276
0.197617	0.20003	276
0.297035	0.133852	272
0.259683	0.18319	272
0.121122	0.106355	298
0.211687	0.0714607	286
0.128776	0.0846752	272
-0.125043	-0.119562	288
-0.118306	-0.110626	278
-0.193795	-0.186288	274
0.357886	-0.141928	764
0.398791	-0.233291	764
0.258268	-0.0493348	766
0.313057	-0.114723	772
0.28493	-0.181977	756
0.24785	0.0166945	746
0.311963	-0.0449002	744
0.315264	-0.124968	740
0.287057	0.00895557	738
0.181543	-0.00127422	738
0.310942	-0.0688513	738
0.198569	0.110174	738
0.312003	0.135118	738
0.30922	0.0737611	738
0.224798	0.139178	738
0.148945	0.192739	738
0.226092	0.180227	738
0.343044	0.146176	738
0.110988	0.160106	738
0.236407	0.161762	738
0.153005	0.145931	738
-0.181142	-0.156659	1236
0.169113	-0.0215717	1252
0.276777	-0.154671	1248
0.288212	-0.00652364	1242
0.294057	-0.129834	1236
0.246427	-0.196504	1220
0.278398	0.105845	1226
0.141934	0.192372	1248
0.2208	0.155284	1704
0.274398	0.135706	-3556
0.296128	0.0135771	-3566
0.204621	-0.060127	-3572
-0.171178	-0.16842	-3572
0.256728	0.0608771	-3068
0.23592	0.275387	-3072
0.250726	0.0807425	-3070
0.184085	-0.0330003	-3086
0.354186	-0.00400188	-3096
-0.166412	-0.128616	-2610
0.0816379	0.229295	-2610
0.15593	-0.0243884	-2600
0.281664	0.154898	-2594
0.234937	0.220735	-2622
0.229393	0.23657	-2618
-0.158926	-0.0868297	-2624
-0.12047	-0.038432	-2124
-0.0813836	-0.0954973	-2134
-0.169199	-0.174001	-2146
0.0894142	0.0188137	-2156
0.198441	0.0401615	-2156
0.123431	0.244917	-2156
0.154853	0.327804	-2156
0.311323	0.00597214	-1626
0.22905	0.013186	-1638
0.257181	-0.0252112	-1642
0.321328	-0.0823751	-1648
0.229717	0.138304	-1650
0.289815	-0.000911005	-1684
0.114992	0.134113	-1686
-0.150535	-0.183945	-1148
0.0409478	0.0179742	-1146
0.311392	0.0881294	-1150
0.0493219	0.0337145	-1158
0.280358	0.163627	-1156
0.29664	0.0669219	-1160
0.0943093	0.185988	-1162
0.161232	-0.0626745	-1162
0.157268	0.0406073	-1162
0.211852	0.220827	-1168
0.0555985	0.0414229	-1178
0.161458	0.00786279	-1174
0.247879	-0.00204518	-700
0.170078	-0.040798	-684
0.322043	0.233869	-660
0.199772	0.0817544	-668
0.245122	0.175272	-670
0.214659	0.206543	-676
0.191329	0.074108	-682
0.253519	0.122374	-694
0.280159	0.127362	-694
0.14708	0.0484246	-698
0.0940723	0.148513	-678
0.0659834	0.0679065	-676
0.0611636	0.179013	-680
0.0817108	0.157624	-690
0.0901681	0.208146	-696
0.319284	-0.0918958	-216
0.0861276	0.104114	-190
0.158054	0.091706	-188
0.215967	0.0740397	-196
0.162929	0.0566897	-196
0.0903086	0.190294	-198
0.120337	0.147833	-204
0.291219	0.248819	-204
0.215112	-0.00440779	-196
0.103515	0.220502	-200
0.283168	0.0404083	-204
0.30283	-0.0202745	-210
0.0982561	0.100135	-216
0.124741	0.0102849	-216
0.254155	0.219722	-214
0.255134	0.0718534	-216
0.208703	0.0868343	-220
0.193383	0.015241	-224
0.286795	0.115123	-228
0.159728	-0.102434	-216
0.24642	-0.331576	-214
0.269149	-0.308025	-214
0.156562	-0.0708692	-192
-0.161562	-0.175728	-222
-0.197688	-0.139137	-216
0.00565756	-0.037055	-200
-0.167665	-0.139636	-200
0.147631	0.0440974	304
0.144915	0.0665781	304
0.126112	0.0834387	300
0.194827	0.0541084	298
0.177545	0.0160246	290
0.215808	0.049844	286
0.189105	-0.0220382	278
0.225168	0.0341216	278
0.425506	-0.228728	276
0.1118	0.0924872	304
0.0831693	0.206113	302
0.251313	0.136992	300
0.232595	0.145626	300
0.288445	0.101964	298
0.353712	0.0254524	294
0.208744	0.0644144	292
0.296388	0.164686	290
0.134366	0.105617	288
0.154168	0.123412	288
0.273222	0.0668873	284
0.261262	0.200584	284
0.30232	0.242202	280
0.151242	0.233989	278
0.307368	0.140322	274
0.305973	0.0925785	272
0.28575	0.0912929	272
0.272321	0.0557242	274
0.340326	0.141003	270
0.317291	0.0581408	268
0.175198	0.138741	270
0.358181	0.0723599	266
-0.0689568	-0.123651	298
0.0913178	0.000934356	284
0.0283144	0.00546563	270
0.263571	-0.0291128	748
0.173629	-0.00718461	746
0.301032	-0.0522504	744
0.240649	-0.0241815	738
0.278447	-0.0430069	734
0.29813	-0.0858482	754
0.228698	0.054115	738
0.36507	0.0983385	738
0.177329	0.12568	738
0.133744	0.108122	738
0.124119	0.148415	738
0.190364	0.288759	738
0.136025	0.221103	738
0.196875	0.0797938	738
0.189223	0.0667636	738
0.137724	0.146284	738
0.292251	0.175339	738
0.294304	0.135644	738
0.268189	0.175274	738
0.0994241	0.221139	738
0.269181	0.267018	738
0.0935055	0.183906	738
0.366627	0.121267	738
0.304835	0.030855	738
0.0988539	0.274541	738
0.225989	0.118186	738
0.313827	0.157543	738
-0.190198	-0.0935511	738
-0.0824837	-0.145694	738
-0.150901	-0.179306	738
-0.0984002	-0.141448	1236
-0.232947	-0.217711	1230
0.177336	0.0183783	1226
0.204739	-0.0560994	1254
0.21108	0.224476	1224
0.26764	0.220442	1240
0.249398	0.205433	1238
0.0490035	0.136306	1246
-0.245317	-0.153167	1736
0.211652	0.218417	1714
0.203791	0.137697	1710

## Sheet: Sheet2
0.335527	-0.126209	-194
0.289437	-0.0950453	-200
0.343842	-0.197085	-202
0.366669	-0.180488	-222
0.28681	-0.148515	-222
0.369679	-0.204593	-226
0.339635	-0.19407	-226
0.376283	-0.028122	292
0.29025	-0.0903867	274
0.307084	-0.0342059	276
0.33562	-0.0560754	270
0.333282	-0.0679129	286
0.326482	-0.0126033	296
0.323965	-0.0373773	770
