# Supplementary material for: Spinal premotor interneurons controlling antagonistic muscles are spatially intermingled
Source: eLife. 2022 Dec 13;11:e81976. doi: 10.7554/eLife.81976 (PMC9844990; doi:10.7554/eLife.81976)
Supplement: Figure 12—figure supplement 10—source data 3. [file elife-81976-fig12-figsupp10-data3.xlsx]

## Sheet: Sheet1
0.237838	0.167916	-4010
0.211084	0.0114371	-4014
0.211413	0.142579	-4026
-0.0699351	-0.0869782	-4036
0.214843	-0.0018111	-4038
-0.121877	-0.0462647	-3536
-0.138937	-0.126264	-3568
-0.125611	-0.192661	-3564
0.248669	0.122801	-3540
0.0869651	0.133704	-3544
0.17376	0.0483462	-3544
0.274733	0.200971	-3548
0.219655	0.119304	-3550
0.233002	0.143754	-3558
0.298975	-0.00202459	-3560
-0.316383	0.267443	-3070
-0.0785231	0.0165607	-3072
0.0232576	-0.00886046	-3076
-0.149646	0.052376	-3088
-0.0798736	-0.0269072	-3094
0.0379389	-0.00756516	-3096
-0.14075	-0.00335346	-3100
-0.101098	-0.115901	-3102
0.192047	0.090925	-3058
0.273828	0.0425461	-3062
0.280463	0.0794501	-3066
0.317601	0.0292832	-3076
0.255207	0.140313	-3078
0.250494	-0.00940877	-3086
0.104245	0.0736093	-3092
0.207418	0.193833	-3096
-0.159783	-0.120991	-2576
-0.16228	-0.0349032	-2574
-0.167004	-0.0757047	-2588
-0.131048	-0.142256	-2600
0.180786	-0.0396233	-2574
0.0660807	-0.0438794	-2584
0.0462111	0.00614857	-2588
0.149099	0.0407205	-2588
0.00590201	-0.0392109	-2588
0.258056	0.0564932	-2598
0.190189	-0.00860063	-2590
0.291368	0.0396454	-2602
0.289518	0.0109349	-2602
0.109558	0.135165	-2580
0.201008	0.297458	-2596
-0.0734497	0.0459302	-2120
-0.171881	-0.0895539	-2094
0.10392	0.207309	-2092
0.242774	0.112963	-2104
0.238541	0.027582	-2102
0.239294	0.0446389	-2098
0.289428	0.101423	-2104
0.175062	0.172681	-2108
0.375769	-0.131058	-2094
-0.0681531	-0.127834	-1610
-0.0742225	-0.138357	-1612
-0.144659	-0.165318	-1618
-0.0317592	-0.0964594	-1624
0.0156519	-0.00972641	-1622
-0.102304	-0.185653	-1642
-0.0571017	-0.133771	-1644
-0.171493	-0.193013	-1640
-0.218574	-0.167271	-1644
-0.115906	-0.144396	-1642
-0.044997	0.00399213	-1638
0.0764431	0.105881	-1610
0.132372	0.0658193	-1610
0.287803	0.0886627	-1614
0.121474	0.157513	-1614
0.122556	0.0836237	-1618
0.124002	0.0567882	-1624
0.0813396	0.170474	-1624
0.203081	0.101045	-1628
0.315753	0.0626475	-1644
0.298086	0.221918	-1648
0.171277	0.0452571	-1642
0.245249	0.157068	-1638
0.250982	0.241168	-1618
0.144055	0.123803	-1630
0.104866	0.206426	-1640
0.082615	0.12367	-1640
0.226591	0.129873	-1618
0.301952	0.181224	-1622
0.190812	0.147802	-1614
0.126468	0.0839596	-1632
0.230684	-0.129381	-1610
0.205831	0.0138201	-1610
0.163789	-0.0380541	-1616
0.208997	0.00997641	-1626
0.174613	-0.0652099	-1630
0.117654	-0.00828893	-1634
0.169916	0.0177107	-1636
0.339513	-0.00607803	-1638
0.307446	-0.0790613	-1626
0.145678	-0.01757	-1622
0.331012	-0.263433	-1616
0.258959	-0.281105	-1618
0.230365	-0.176747	-1632
0.241684	-0.312792	-1632
0.227632	-0.284574	-1638
0.319967	-0.262738	-1646
-0.188727	0.233172	-1134
-0.233593	0.0568814	-1140
-0.186013	-0.00727553	-1148
-0.148639	-0.108717	-1166
-0.122253	-0.0762328	-1166
0.182184	0.200524	-1132
0.200704	0.0518288	-1130
0.212742	0.150345	-1132
0.260458	0.0766488	-1134
0.192284	0.170385	-1136
0.0834763	0.0816468	-1154
0.241166	0.0446692	-1152
0.231792	0.076301	-1152
0.231908	0.158664	-1158
0.213468	0.13186	-1158
0.26571	0.050806	-1162
0.191658	0.0533152	-1162
0.141248	0.220318	-1164
0.070803	0.142688	-1156
0.233987	0.0607953	-1166
-0.0154986	-0.0179058	-1142
0.256402	-0.00933477	-1132
0.26396	0.0171285	-1146
0.208716	-0.0220789	-1156
0.200664	-0.073744	-1166
-0.284908	-0.0240194	-668
-0.11916	-0.228006	-664
-0.155765	-0.171023	-666
-0.057735	-0.0946131	-668
-0.0592801	-0.0625257	-678
-0.1377	-0.00301098	-682
0.314114	0.207046	-646
0.319659	0.125914	-650
0.220585	0.150227	-654
0.0413028	0.234138	-660
0.0969399	0.138827	-658
0.243471	0.132339	-660
0.285931	0.171372	-660
0.258648	0.156331	-662
0.265686	0.185955	-662
0.300297	0.129917	-672
0.20069	0.160027	-660
-0.163382	-0.124285	-684
0.0530431	-0.187734	-670
0.0643441	0.171461	-656
0.227307	0.100868	-660
0.189529	0.0933403	-662
0.201078	0.142734	-682
0.105352	0.126406	-688
0.267225	0.0575781	-654
0.210276	0.00598774	-658
0.274537	0.060329	-656
0.12797	0.0114896	-660
0.211774	0.038342	-666
0.209191	0.0687598	-668
0.237833	0.0547929	-682
0.145043	-0.000636411	-688
0.0433491	0.0300892	-658
0.111202	-0.0415036	-660
0.109776	-0.0248542	-664
0.0850911	0.0182438	-666
0.116044	-0.0965429	-666
0.133199	-0.027961	-666
0.0575232	0.0655845	-670
0.142909	-0.0420784	-676
0.158535	-0.0883106	-680
0.112824	0.0647907	-682
0.296044	-0.293447	-650
-0.251621	-0.0382275	-170
-0.145325	-0.107143	-172
-0.193429	-0.165614	-184
-0.159893	-0.0620768	-198
-0.14731	-0.126291	-204
0.245036	0.201385	-168
0.20604	0.179954	-168
0.0399981	0.15202	-170
0.115992	0.146405	-174
0.196301	0.204275	-180
0.206025	0.188962	-176
0.187275	0.106938	-172
0.17153	0.112917	-178
0.159503	0.133496	-180
0.122278	0.0514873	-176
0.119467	0.0612857	-174
0.20161	0.0617878	-182
0.200855	0.220768	-184
0.111984	0.0880639	-192
0.0735815	0.0955572	-192
0.152676	0.0650057	-200
0.118741	0.153024	-200
0.100589	0.237307	-198
0.224049	0.0789426	-202
0.226148	0.13224	-204
0.225298	0.247471	-198
0.282688	0.0790719	-196
0.237496	0.0393077	-196
0.0959973	0.209235	-192
0.111524	0.241879	-190
0.197484	0.0255078	-170
0.238341	-0.0145911	-178
0.0441005	-0.00465576	-180
0.147766	0.009593	-186
0.17021	-0.140449	-186
0.189312	0.0209357	-190
0.235919	-0.0700647	-198
0.17531	-0.0709928	-200
0.109567	0.00925067	-204
0.236043	-0.0103537	-202
0.345259	0.0186915	-188
0.420194	-0.161871	-178
0.127007	-0.242008	-176
0.268297	-0.224587	-196
0.228052	-0.260449	-194
0.217801	-0.164846	-196
-0.131455	-0.144319	314
-0.0757089	-0.114455	310
-0.12828	-0.13066	308
-0.00552822	-0.0515455	314
-0.087934	-0.123351	280
-0.141727	-0.119219	278
-0.116541	-0.165925	278
-0.105052	-0.125577	276
0.00742788	-0.0804593	280
0.126119	0.433588	316
0.242244	0.39745	308
0.243877	0.360784	294
0.192052	0.419832	280
0.145601	0.323071	280
0.28877	0.158915	308
0.0720857	0.185832	308
0.201844	0.170009	310
0.259933	0.242217	306
0.0866426	0.250586	292
0.246075	0.139271	298
0.273231	0.164191	294
0.251534	0.199477	294
0.224384	0.19038	292
0.131157	0.144368	288
0.0818828	0.197473	296
0.195126	0.238396	286
0.266934	0.1902	286
0.266657	0.164011	284
0.247756	0.18129	280
0.223402	0.234943	282
0.133504	0.0452081	312
0.116973	0.102093	310
0.0831528	0.0786496	310
0.0523367	0.0361734	310
-0.0457412	0.0398344	306
0.106824	0.0205447	304
0.0435054	0.00931897	304
0.0609812	0.0681519	306
0.0442578	0.031292	300
0.0763866	0.116979	302
0.176908	0.107459	290
0.111525	0.0679092	284
0.0775178	0.108194	288
0.164134	0.00272497	290
0.381117	-0.0310563	280
0.31624	0.104034	278
0.245611	0.0816034	276
0.264661	0.0903676	276
0.17796	0.0632982	278
0.220216	0.0174107	282
0.223391	0.0566002	284
0.284698	0.0398414	282
0.240056	0.0537643	294
0.207324	0.0413876	298
0.238076	0.0996519	296
0.221609	0.0803137	306
0.251369	0.123109	306
0.272991	0.113055	310
0.18788	-0.0385309	304
0.264261	0.11718	306
0.229363	-0.232967	316
0.223466	-0.205232	310
0.181796	-0.153728	294
0.115122	-0.0612736	282
0.374969	0.00658707	312
-0.162623	-0.10976	790
-0.251696	-0.118306	780
-0.108096	-0.115315	776
-0.121059	-0.180624	770
-0.103528	-0.066641	768
-0.172428	-0.0436962	768
-0.185077	0.143095	770
0.107883	0.406854	792
0.130094	0.42158	776
0.159818	0.404696	774
0.152707	0.367964	772
0.149989	0.411404	764
0.111463	0.407687	756
0.0759974	0.078619	792
0.171203	0.0783912	790
0.187228	0.0658363	786
0.162512	0.0510312	788
0.228777	0.0980317	790
0.165942	0.226998	786
0.0892321	0.159887	782
0.0482493	0.142105	778
0.193259	0.199567	772
0.220832	0.188201	774
0.127817	0.112388	768
0.0899587	0.14536	756
0.0551766	0.106043	756
0.16973	0.224221	758
0.105272	0.0444653	758
0.259931	0.181863	760
0.274793	0.0976471	760
0.295255	0.108172	758
0.180581	0.127799	760
0.200438	0.113549	762
0.192266	0.0383909	758
0.165486	0.159097	780
0.179249	0.042507	792
0.177195	0.0609654	786
0.355485	0.183245	770
0.323067	0.137996	774
0.145857	-0.194205	780
0.157919	-0.0298881	784
0.182209	0.0305218	786
0.3225	-0.0172122	770
0.167492	0.00558309	760
0.162812	-0.000754857	792
0.150803	-0.00952116	792
0.187484	-0.279724	770
0.211313	-0.271278	764
-0.132281	-0.102616	1266
-0.138071	-0.137751	1250
-0.130578	-0.17362	1250
-0.14385	-0.0932249	1248
-0.200111	-0.175792	1246
-0.333502	-0.123135	1248
-0.208464	-0.152361	1242
-0.16591	-0.0904411	1250
-0.317612	0.277881	1270
-0.149672	0.220147	1270
0.0423523	0.0447898	1270
0.161084	0.0580182	1270
0.0104316	-0.0269337	1268
0.109382	0.0703281	1272
0.17632	0.0303084	1274
0.200345	0.0349291	1258
0.0585412	-0.0507632	1260
0.221246	0.0113487	1254
0.167336	0.0573276	1254
0.195997	0.146074	1252
0.141183	0.0745144	1244
0.205319	0.111416	1258
0.189451	0.0266632	1238
0.0866636	0.222668	1266
0.209748	0.166372	1256
0.077119	0.201608	1254
0.105307	0.213227	1256
0.104001	0.241264	1236
0.205944	0.234059	1238
0.270341	-0.00500513	1242
0.223483	-0.131294	1274
0.144234	0.19428	1744
-0.0916638	0.287076	1736
-0.367251	-0.0702377	1752
-0.172526	-0.0898918	1722
-0.200743	-0.0765747	1718
0.207221	0.188904	1748
0.271728	0.0232006	1736
0.341962	-0.013091	1732
0.271964	0.0319609	1754
0.247357	-0.00685986	1728
0.29147	0.03023	1718
0.189861	-0.139684	1726
-0.174322	-0.0161813	2224
0.115355	0.168077	2200
0.287804	0.0299523	2202
0.143357	0.133777	-4008
0.169025	-0.024468	-4016
0.143729	0.174364	-4034
-0.0942629	-0.0285719	-3554
0.273825	0.14438	-3528
0.249891	0.056347	-3554
0.14575	0.143445	-3564
0.352637	0.00775588	-3052
0.279335	0.0278528	-3052
0.230446	-0.0136999	-3054
0.128728	0.0975207	-3070
0.342592	-0.0103942	-3090
0.242412	-0.0579466	-3090
0.266032	-0.0109128	-2572
0.240356	-0.033622	-2572
0.233309	0.0666549	-2578
0.250451	0.0253601	-2578
0.216384	-0.0491885	-2600
0.217286	-0.0676563	-2602
0.211583	0.0556096	-2602
0.0697871	0.0411844	-2574
0.259317	-0.125335	-2572
0.351112	-0.0494315	-2572
0.346644	-0.0228638	-2568
0.30501	-0.144171	-2582
0.327043	-0.00195134	-2590
0.297853	-0.00465377	-2604
0.192033	0.124996	-2578
0.172182	0.131535	-2588
0.146507	0.151704	-2604
0.157812	0.139782	-2602
0.328342	0.0872287	-2594
0.0338726	0.0993103	-2094
0.13471	0.0407498	-2092
-0.159243	0.0338673	-2102
-0.0252302	0.034039	-2098
0.115384	0.133342	-2100
0.0375741	0.0221776	-2116
0.129299	0.0282763	-2116
0.176373	0.11471	-2100
0.249568	0.102654	-2098
0.357654	0.00639724	-2102
0.242066	-0.193754	-2108
0.271252	-0.201905	-2104
0.256407	-0.168329	-2102
-0.0144448	-0.0148435	-1620
-0.00112734	-0.0844752	-1616
-0.162878	-0.101397	-1638
0.277008	0.159576	-1612
0.133539	0.0936392	-1608
0.216308	0.150732	-1614
0.221443	0.117084	-1618
0.0973957	0.110936	-1626
0.207779	0.141107	-1624
0.256778	0.131279	-1624
0.232506	0.1066	-1632
0.243575	0.125467	-1632
0.237858	0.20745	-1636
0.236298	0.0570694	-1638
0.16884	0.127764	-1644
0.207124	0.222192	-1642
0.259005	0.122232	-1644
0.234505	0.15649	-1646
0.100003	0.197669	-1646
0.247987	0.149248	-1632
0.256374	0.160552	-1628
0.149755	0.110475	-1628
0.193721	0.125756	-1630
0.229449	0.108397	-1646
0.19769	0.105881	-1618
0.235968	0.0268902	-1610
0.280572	0.0269136	-1612
0.303221	0.0277808	-1610
0.317672	0.0307808	-1612
0.316317	-0.0320229	-1618
0.265245	0.0519758	-1620
0.189827	-0.0653037	-1630
0.260724	0.00288277	-1640
0.315076	0.0475539	-1644
0.270341	0.0195466	-1646
0.240255	-0.0354682	-1646
0.212442	-0.0995141	-1638
0.276752	0.0483117	-1624
0.295666	-0.179849	-1610
0.284319	-0.281363	-1616
0.181656	-0.266074	-1618
0.301804	-0.170255	-1622
0.26939	-0.224356	-1624
0.229472	-0.155654	-1628
0.168441	-0.181716	-1630
0.32246	-0.189106	-1632
-0.187809	0.183757	-1142
-0.10623	-0.190071	-1144
-0.10291	-0.0852403	-1134
0.14707	0.191366	-1128
0.159254	0.155561	-1130
0.247094	0.137424	-1132
0.233094	0.173344	-1132
0.247639	0.186259	-1132
0.218317	0.0811423	-1130
0.286067	0.133428	-1134
0.216445	0.125832	-1134
0.0996156	0.0880087	-1138
0.156146	0.0918271	-1144
0.161363	0.157273	-1142
0.213953	0.152418	-1138
0.182315	0.224184	-1152
0.275064	0.170392	-1158
0.33554	0.130312	-1158
0.179762	0.130291	-1158
0.234234	0.166819	-1162
0.206062	0.213772	-1164
0.0958418	0.110374	-1158
0.213019	0.145101	-1156
0.0132888	0.0358049	-1140
0.135249	0.0197605	-1130
0.308987	-0.0399165	-1132
0.309916	-0.00575496	-1134
0.280518	-0.0369368	-1138
0.342129	-0.0165967	-1140
0.365432	-0.0676958	-1146
0.243346	0.0226585	-1148
0.283303	-0.0652275	-1152
0.263506	-0.0323069	-1152
0.332286	-0.0911862	-1156
0.301778	-0.0890928	-1156
0.277708	-0.0819878	-1160
0.325535	0.00375709	-1154
0.229406	-0.131273	-1160
0.253375	-0.21907	-1156
0.253557	-0.199944	-1154
0.281133	-0.238824	-1154
0.381869	-0.19213	-1152
0.273697	-0.203967	-1146
0.261876	-0.157	-1140
0.254566	-0.170651	-1128
0.209273	0.193407	-652
0.202406	0.161012	-654
0.219009	0.113493	-654
0.165511	0.186872	-658
0.0804611	0.176279	-658
0.20455	0.111392	-668
0.234056	0.117346	-664
0.121371	0.124449	-664
0.167661	0.196411	-670
0.0815515	0.168964	-674
0.219567	0.168868	-662
-0.173339	-0.198807	-680
0.10419	0.171858	-656
0.126678	0.130033	-658
0.0980405	0.102585	-664
0.175567	0.0965155	-664
0.193105	0.0926491	-668
0.0486095	0.103379	-668
0.154541	0.138327	-676
0.20607	0.134926	-682
0.240334	0.127631	-680
0.10915	0.209058	-686
0.178538	0.127925	-686
0.230532	0.120856	-686
0.250576	0.127084	-686
0.205832	0.0993964	-664
0.254374	-0.00474913	-656
0.329239	0.128131	-664
0.133726	0.071059	-658
0.179447	0.0461022	-660
0.126962	-0.0109353	-664
0.121407	0.024909	-666
0.326206	0.0270714	-686
0.270176	0.114335	-682
0.282898	0.0275778	-680
0.228015	0.0299182	-676
0.181726	-0.033196	-666
0.112044	-0.0528769	-680
0.0905013	0.0488189	-682
0.250933	-0.281506	-652
0.296633	-0.301392	-660
0.324826	-0.313634	-654
0.321917	-0.235534	-682
0.191173	0.150171	-172
0.217938	0.133321	-172
0.234125	0.139224	-170
0.169337	0.240768	-176
0.246688	0.154644	-178
0.182019	0.134568	-176
0.0833436	0.160358	-182
0.0967618	0.129083	-184
0.203632	0.111548	-180
0.291696	0.126535	-190
0.149475	0.114401	-198
0.122743	0.201392	-200
0.187916	0.157741	-198
0.203917	0.144998	-198
0.147567	0.0800761	-204
0.271967	0.114386	-202
0.204511	0.129684	-198
0.191297	0.106611	-206
0.289454	-0.118783	-176
0.156541	-0.13561	-186
0.246702	-0.144184	-188
0.267912	0.0215063	-192
0.196814	-0.025059	-196
0.245862	-0.10442	-198
0.143464	-0.128452	-200
0.206994	-0.0926664	-166
0.248336	0.04283	-172
0.328346	-0.0106809	-186
0.282878	0.0244504	-186
0.320977	-0.0182655	-180
0.314449	-0.00169646	-174
0.205384	-0.265926	-176
0.271241	-0.298167	-168
0.283932	-0.288711	-168
0.234476	-0.27644	-186
0.222102	-0.263355	-192
0.219709	-0.197862	-192
-0.0116434	-0.0010262	310
0.188685	0.145456	308
0.194288	0.139632	304
0.218781	0.160551	304
0.167693	0.212755	300
0.225083	0.153097	310
0.197367	0.158734	292
0.137176	0.192745	288
0.117998	0.13127	286
0.282889	0.172553	290
0.140393	0.178198	292
0.1047	0.251494	278
0.151594	0.176741	274
0.0607944	0.0832883	310
0.138953	0.00126194	304
0.0854046	0.0976966	304
0.158872	-0.00386904	278
0.289063	-0.042913	288
0.356122	0.0496388	280
0.32537	0.0109692	296
0.2968	0.0748984	296
0.242441	0.123365	296
0.279341	0.0470594	306
0.232916	0.0313336	314
0.220216	-0.049618	314
0.271006	-0.0921496	304
0.262479	-0.0733314	310
0.210697	0.118214	306
0.192639	0.124912	310
0.113697	-0.0441056	306
0.257617	-0.138141	288
0.256198	-0.164552	288
0.226316	-0.11146	288
0.299698	-0.122291	288
0.328561	-0.103271	288
0.237495	-0.206286	304
0.25274	-0.184632	282
0.29807	-0.210252	284
0.354575	-0.285796	312
0.359094	-0.145214	306
0.379676	-0.352665	308
0.373902	-0.342881	304
0.355327	-0.210121	296
-0.113376	-0.0738763	790
-0.26416	0.0245756	766
-0.249181	0.253682	788
-0.229969	0.196711	758
0.157033	0.180012	790
0.231403	0.131637	788
0.167075	0.246276	778
0.0944349	0.0895929	758
0.213794	0.122778	792
0.294078	0.0526121	788
0.319167	0.180076	784
0.274134	-0.202978	780
0.255542	-0.119267	780
0.208145	-0.158598	778
0.212302	-0.0206161	788
0.21717	-0.0101194	786
0.231892	-0.258716	786
0.200767	-0.248533	770
-0.201918	-0.0507347	1262
0.00653541	-0.0652945	1270
0.0121131	0.0448112	1270
0.0110465	0.0648958	1270
0.191421	0.142486	1264
0.197439	0.00729054	1262
0.0934929	0.0404041	1244
0.0779842	0.101178	1244
0.245228	0.0501581	1266
0.225012	0.222874	1250
0.116946	0.159295	1262
0.259185	-0.0263214	1270
0.280119	0.139246	1264
0.250501	0.0875648	1266
0.277834	0.117033	1240
0.305363	-0.0976249	1274
0.259251	-0.140699	1274
0.358915	-0.142215	1248
0.382074	-0.132896	1248
0.276299	-0.0979097	1242
-0.155004	-0.0527948	1738
0.322238	-0.0104699	1752
0.27908	-0.0707746	1750
0.187596	0.00762286	1740
0.215224	0.0290078	1722
-0.174738	-0.0680105	2216
-0.25279	-0.19535	2210
0.056163	0.12314	2210
0.121745	0.156171	2216
0.222461	0.0370987	2208
0.240165	-0.031357	2204
0.31113	-0.038158	2228
0.349004	-0.102599	2230

## Sheet: Sheet2
0.292227	-0.194856	-1610
0.312246	-0.206122	-1614
0.363324	-0.144724	-1620
0.295381	-0.2082	-1628
0.329361	-0.217543	-1644
0.312246	-0.216637	-1614
0.289559	-0.23771	-654
0.288262	-0.14324	-652
0.366258	-0.137342	-656
0.325064	-0.0841089	-662
0.354042	-0.267388	-662
0.349438	-0.283504	-674
0.302121	-0.24948	-676
0.315962	-0.17697	296
0.388464	-0.17783	288
