# Supplementary material for: Spinal premotor interneurons controlling antagonistic muscles are spatially intermingled
Source: eLife. 2022 Dec 13;11:e81976. doi: 10.7554/eLife.81976 (PMC9844990; doi:10.7554/eLife.81976)
Supplement: Figure 12—figure supplement 11—source data 1. — The x-y coordinates are normalized (between –0.5 and 0.5) and scaled to an idealized spinal cord of dimensions 1700 μm and 900 μm in the mediolateral and dorsoventral directions respectively, while z coordinates are in micron, with the axis origin taken at the border between L4 and L5 and negative values in the rostral direction. [file elife-81976-fig12-figsupp11-data1.xlsx]

## Sheet: Sheet1
0.296601	-0.2344	-2000
-0.146498	-0.213641	-2000
-0.0543293	-0.207982	-2000
0.332368	-0.204688	-2000
0.352398	-0.203399	-2000
-0.0946863	-0.128061	-2000
-0.0631123	-0.11342	-2000
0.221408	-0.0908478	-2000
0.259486	-0.0879668	-2000
0.250122	-0.0453802	-2000
0.249013	-0.0317393	-2000
0.256934	0.00155811	-2000
0.406152	0.0258015	-2000
0.0840951	0.0298785	-2000
0.182392	0.0337402	-2000
-0.0820416	0.048073	-2000
0.369429	0.0524474	-2000
0.178215	0.119009	-2000
0.235287	0.134699	-2000
0.134451	0.160591	-2000
0.299908	0.174006	-2000
0.335583	0.179466	-2000
0.271067	0.196786	-2000
0.323094	0.200836	-2000
0.138605	0.222991	-2000
0.212696	0.235965	-2000
-0.123855	0.271967	-2000
0.0804974	0.284586	-2000
0.162103	0.308315	-2000
0.236063	0.355077	-2000
-0.133686	-0.276758	-1920
-0.113853	-0.271084	-1920
-0.140907	-0.262487	-1920
0.309126	-0.237677	-1920
-0.107688	-0.177043	-1920
-0.0618007	-0.160048	-1920
-0.0917489	-0.138364	-1920
0.0367871	-0.125763	-1920
0.284655	-0.0749809	-1920
0.217561	-0.0422864	-1920
0.205948	-0.00348508	-1920
0.282644	0.0226162	-1920
0.0464601	0.025262	-1920
0.0749619	0.02799	-1920
0.0933538	0.107711	-1920
0.0667316	0.11705	-1920
0.267524	0.153737	-1920
0.233938	0.175628	-1920
0.183914	0.190667	-1920
-0.227714	0.202456	-1920
0.130562	0.218779	-1920
0.185371	0.232558	-1920
0.158231	0.234927	-1920
0.273301	0.244504	-1920
0.154002	0.263984	-1920
0.246906	0.295063	-1920
0.187966	0.30084	-1920
-0.133872	-0.279103	-1880
0.138056	-0.245457	-1880
-0.143686	-0.240308	-1880
-0.0914495	-0.225163	-1880
-0.170632	-0.211581	-1880
-0.12837	-0.161505	-1880
0.263606	-0.104932	-1880
-0.168472	-0.0507622	-1880
0.0800195	0.0176058	-1880
0.199252	0.0671288	-1880
0.0606597	0.0745715	-1880
0.20774	0.126132	-1880
0.183249	0.144355	-1880
0.0783958	0.161263	-1880
0.236526	0.16192	-1880
0.0959831	0.168269	-1880
0.190784	0.183172	-1880
0.11685	0.190289	-1880
0.187846	0.205484	-1880
0.147764	0.212582	-1880
0.219544	0.214268	-1880
-0.222987	0.228136	-1880
0.0749842	0.229332	-1880
0.211052	0.260854	-1880
0.29164	-0.343796	-1840
-0.144554	-0.256493	-1840
-0.116067	-0.208319	-1840
-0.138498	-0.181668	-1840
-0.126367	-0.162836	-1840
-0.12276	-0.0505086	-1840
0.333885	-0.0325092	-1840
0.182539	-0.0216515	-1840
0.220582	-0.00974792	-1840
0.129894	0.0209772	-1840
0.180247	0.0561898	-1840
0.138515	0.0801187	-1840
0.147566	0.0835786	-1840
0.130304	0.0870495	-1840
0.248679	0.120413	-1840
0.177351	0.129002	-1840
0.15356	0.130204	-1840
0.175268	0.150435	-1840
0.196485	0.169163	-1840
0.172628	0.176538	-1840
0.0832058	0.184881	-1840
0.238987	0.190783	-1840
0.193597	0.194078	-1840
0.210143	0.202954	-1840
0.185326	0.203305	-1840
0.269689	0.203395	-1840
0.14136	0.204545	-1840
0.154667	0.238744	-1840
0.207218	0.258171	-1840
0.0589084	0.297925	-1840
-0.17709	-0.275711	-1800
-0.127964	-0.192659	-1800
-0.11536	-0.181089	-1800
-0.0165448	-0.159962	-1800
-0.145463	-0.158909	-1800
-0.12789	-0.12802	-1800
-0.0583926	-0.123766	-1800
0.274234	-0.073584	-1800
-0.15572	-0.0566653	-1800
0.315457	-0.040645	-1800
0.21882	-0.00981865	-1800
0.0974359	0.00845713	-1800
0.0699171	0.029451	-1800
0.26764	0.0461584	-1800
0.231186	0.079412	-1800
0.131447	0.0918406	-1800
0.180568	0.100299	-1800
0.0920522	0.10204	-1800
0.152191	0.109135	-1800
0.0999525	0.132841	-1800
0.123862	0.134975	-1800
0.19537	0.135736	-1800
0.186765	0.193936	-1800
0.0759161	0.194796	-1800
0.178058	0.226126	-1800
0.192655	0.241046	-1800
0.19773	0.263848	-1800
0.198649	0.280948	-1800
0.273057	-0.311137	-1760
-0.11692	-0.209383	-1760
-0.169873	-0.20491	-1760
-0.155875	-0.190038	-1760
0.190509	-0.155139	-1760
0.239316	-0.11263	-1760
0.175321	-0.110281	-1760
-0.12418	-0.109956	-1760
0.271232	-0.0539848	-1760
0.283272	-0.0419535	-1760
0.23054	-0.0397902	-1760
0.244626	-0.0325452	-1760
0.255119	-0.018259	-1760
0.147805	0.00106849	-1760
0.314519	0.0270994	-1760
0.0970146	0.0331255	-1760
0.0611723	0.0356761	-1760
0.0223341	0.0434665	-1760
0.180361	0.0464819	-1760
0.114415	0.0512203	-1760
0.121743	0.065283	-1760
0.264781	0.076236	-1760
0.167088	0.0764102	-1760
0.102003	0.0778646	-1760
0.13886	0.0988935	-1760
0.175263	0.103272	-1760
0.0844536	0.106004	-1760
0.144305	0.132327	-1760
0.264141	0.149902	-1760
0.161804	0.166644	-1760
0.191413	0.207365	-1760
0.120826	0.232914	-1760
0.204277	0.24644	-1760
0.190712	0.256182	-1760
-0.191635	-0.355936	-1720
-0.164443	-0.28685	-1720
0.296637	-0.286336	-1720
0.284535	-0.261131	-1720
-0.170308	-0.25745	-1720
-0.171985	-0.197971	-1720
-0.0572775	-0.184013	-1720
-0.192565	-0.178604	-1720
0.176942	-0.156413	-1720
-0.0652449	-0.152129	-1720
-0.0358531	-0.102096	-1720
0.229078	-0.0983839	-1720
-0.179471	-0.0547061	-1720
0.169317	-0.0271821	-1720
0.157306	0.0272083	-1720
0.0411878	0.0307576	-1720
0.2452	0.0436297	-1720
0.106342	0.0514882	-1720
0.0230943	0.067864	-1720
0.091669	0.099318	-1720
0.136724	0.103457	-1720
0.131923	0.119685	-1720
0.262604	0.122319	-1720
0.0933781	0.134416	-1720
0.0755115	0.136468	-1720
0.133604	0.139602	-1720
0.114961	0.151156	-1720
0.203794	0.16215	-1720
0.162341	0.191046	-1720
0.176616	0.220331	-1720
0.0542524	0.229513	-1720
0.200819	0.23798	-1720
0.183945	0.286872	-1720
0.188874	0.399872	-1720
0.266218	-0.357595	-1680
0.206549	-0.304137	-1680
-0.13729	-0.182301	-1680
-0.0661425	-0.16819	-1680
-0.101041	-0.167291	-1680
-0.0512536	-0.148625	-1680
-0.104892	-0.116828	-1680
0.192425	-0.10452	-1680
0.223513	-0.101329	-1680
0.322034	-0.0507945	-1680
0.267673	-0.0371123	-1680
-0.0858598	-0.0318291	-1680
0.242747	0.00624727	-1680
0.263342	0.0158469	-1680
0.0816838	0.0182832	-1680
-0.0395535	0.0243328	-1680
0.289109	0.040423	-1680
0.0673249	0.052529	-1680
0.213005	0.0536901	-1680
0.10204	0.0663671	-1680
0.260122	0.070829	-1680
0.273778	0.0828245	-1680
0.0703752	0.0916584	-1680
0.14024	0.0963789	-1680
0.0834653	0.0993707	-1680
0.124394	0.110362	-1680
0.210368	0.12304	-1680
0.104038	0.135874	-1680
0.124142	0.144596	-1680
0.182123	0.152526	-1680
0.0994876	0.176422	-1680
0.169117	0.178327	-1680
0.0614352	0.189088	-1680
0.21416	0.200102	-1680
0.185234	0.204918	-1680
0.157405	0.215507	-1680
0.171879	0.228232	-1680
0.201443	-0.320232	-1640
0.292194	-0.304969	-1640
0.293134	-0.276121	-1640
0.213993	-0.226072	-1640
-0.104348	-0.218289	-1640
-0.119094	-0.204057	-1640
-0.106378	-0.116641	-1640
-0.067955	-0.106258	-1640
-0.00661809	-0.0744541	-1640
0.196714	-0.0509338	-1640
-0.028124	-0.0245247	-1640
-0.14754	0.00699877	-1640
0.299149	0.02583	-1640
0.078338	0.0492969	-1640
0.037486	0.0607377	-1640
0.000996084	0.0666622	-1640
-0.026074	0.0959264	-1640
0.0668478	0.108592	-1640
0.0750839	0.109574	-1640
0.0688674	0.126445	-1640
0.0867201	0.129435	-1640
0.02083	0.138284	-1640
0.152002	0.170625	-1640
0.102166	0.177517	-1640
0.0890637	0.195591	-1640
0.153004	0.209835	-1640
0.0687734	0.210699	-1640
0.103853	0.221234	-1640
0.0874861	0.230633	-1640
0.177507	0.271592	-1640
0.343707	0.368455	-1640
-0.156207	-0.277762	-1600
0.0452468	-0.257458	-1600
0.0270366	-0.213724	-1600
-0.0750021	-0.207442	-1600
-0.107146	-0.2032	-1600
-0.0664559	-0.193706	-1600
-0.121481	-0.184871	-1600
-0.047028	-0.164392	-1600
0.358125	-0.137657	-1600
0.242201	-0.135084	-1600
0.225227	-0.121906	-1600
-0.0776748	-0.121198	-1600
0.211704	-0.0973499	-1600
-0.0968688	-0.0910015	-1600
-0.0874709	-0.0667436	-1600
0.191494	-0.0411331	-1600
-0.0271558	-0.0118798	-1600
0.13484	0.0733239	-1600
0.160771	0.098239	-1600
0.263065	0.101824	-1600
0.112866	0.104247	-1600
0.212321	0.136388	-1600
-0.170804	0.148252	-1600
0.235475	0.172867	-1600
0.170851	0.186475	-1600
0.231057	0.218161	-1600
0.104269	0.223657	-1600
0.166341	0.259926	-1600
-0.0909439	0.266836	-1600
0.195513	0.277203	-1600
0.10258	0.314177	-1600
0.195134	0.338094	-1600
0.29919	-0.335553	-1560
0.216485	-0.228172	-1560
0.177918	-0.201103	-1560
-0.202044	-0.179951	-1560
-0.122307	-0.170269	-1560
-0.0824352	-0.156007	-1560
0.176797	-0.147236	-1560
-0.142543	-0.144787	-1560
-0.0742732	-0.142539	-1560
-0.12455	-0.140529	-1560
0.115638	-0.119223	-1560
0.0295524	-0.105541	-1560
-0.0859066	-0.0897157	-1560
0.136096	-0.066599	-1560
0.386806	-0.0610985	-1560
-0.149356	-0.0432882	-1560
0.22595	-0.0364889	-1560
0.243395	-0.0273861	-1560
0.192868	-0.0143553	-1560
0.148003	-0.00835889	-1560
0.0455152	-0.00197421	-1560
-0.252382	0.0289956	-1560
0.309298	0.0305167	-1560
0.218339	0.0314053	-1560
-0.143356	0.0324979	-1560
0.112773	0.0336879	-1560
0.139913	0.0537153	-1560
0.280703	0.0656117	-1560
0.179391	0.0740647	-1560
0.112603	0.0807033	-1560
-0.0142013	0.104124	-1560
0.135617	0.119462	-1560
0.269615	0.1262	-1560
0.221893	0.172356	-1560
0.0769684	0.191223	-1560
0.23905	0.191483	-1560
0.194156	0.193364	-1560
0.198421	0.213727	-1560
0.0863359	0.220186	-1560
0.179113	0.231087	-1560
0.252511	-0.332124	-1480
0.230002	-0.297406	-1480
-0.10237	-0.249281	-1480
-0.0719904	-0.24254	-1480
0.240795	-0.240694	-1480
-0.0915081	-0.216389	-1480
-0.0913063	-0.197871	-1480
-0.196391	-0.172655	-1480
-0.132014	-0.170192	-1480
-0.153896	-0.160664	-1480
-0.104587	-0.150927	-1480
-0.0456656	-0.143247	-1480
0.222701	-0.142659	-1480
0.217874	-0.0808535	-1480
0.21326	-0.0298375	-1480
0.213973	-0.0135949	-1480
-0.0957103	-0.0116579	-1480
0.0315667	-0.00659976	-1480
0.302675	0.00823994	-1480
0.276234	0.00949216	-1480
0.133038	0.0113775	-1480
0.266776	0.0602747	-1480
0.159409	0.0698487	-1480
0.104166	0.092355	-1480
0.125743	0.0935383	-1480
0.239257	0.106115	-1480
0.221757	0.114721	-1480
0.126685	0.132895	-1480
0.0890134	0.146715	-1480
0.212658	0.151677	-1480
0.197252	0.159219	-1480
0.172688	0.179538	-1480
0.130033	0.188228	-1480
0.0894137	0.197674	-1480
0.197465	0.200613	-1480
-0.252054	0.214445	-1480
0.0761851	0.215372	-1480
0.178256	0.227254	-1480
0.193205	0.228992	-1480
-0.171772	0.2529	-1480
0.126622	0.310078	-1480
0.244588	0.348174	-1480
0.157918	-0.374361	-1440
-0.165046	-0.246346	-1440
0.185337	-0.203502	-1440
-0.0709286	-0.177645	-1440
-0.0445127	-0.154224	-1440
-0.0703636	-0.144173	-1440
0.334799	-0.0801345	-1440
-0.299147	-0.0586743	-1440
0.246495	-0.0400283	-1440
0.164638	-0.000693479	-1440
-0.0958934	-0.000612307	-1440
0.19973	0.0145418	-1440
0.106692	0.0463391	-1440
0.116371	0.0665048	-1440
0.316936	0.0677442	-1440
0.0759106	0.0885115	-1440
0.153038	0.103429	-1440
0.0755291	0.116812	-1440
0.126034	0.134941	-1440
0.110396	0.145774	-1440
0.210988	0.15501	-1440
0.228678	0.167653	-1440
0.178364	0.181985	-1440
0.169856	0.19876	-1440
0.104068	0.214116	-1440
0.0797641	0.230706	-1440
0.216786	0.254733	-1440
0.0902261	0.266217	-1440
0.192615	0.279567	-1440
-0.132339	-0.210888	-1400
-0.167531	-0.195066	-1400
-0.0536681	-0.18797	-1400
-0.0948749	-0.174494	-1400
0.223456	-0.155058	-1400
-0.0804575	-0.145461	-1400
0.239099	-0.127389	-1400
0.115315	-0.118336	-1400
-0.0747753	-0.0913009	-1400
0.366479	-0.0681839	-1400
0.13034	-0.0190845	-1400
0.127755	-0.004465	-1400
0.242779	0.0122234	-1400
-0.105246	0.0154477	-1400
0.198234	0.0468881	-1400
0.13854	0.0626278	-1400
0.135398	0.0810225	-1400
0.0758721	0.116433	-1400
0.16291	0.140807	-1400
0.121713	0.164741	-1400
0.188366	0.165048	-1400
0.179593	0.166857	-1400
0.0731365	0.191728	-1400
0.217621	0.196604	-1400
0.18902	0.223402	-1400
0.136685	0.225932	-1400
0.226272	0.226222	-1400
0.233176	0.252921	-1400
0.231563	0.272325	-1400
0.158495	0.273107	-1400
0.182094	0.306023	-1400
-0.16653	-0.160383	-1360
0.198266	-0.158604	-1360
0.248761	-0.136438	-1360
-0.0455511	-0.112372	-1360
-0.100662	0.0306952	-1360
0.0533981	0.0384613	-1360
0.0827499	0.0457635	-1360
0.197097	0.0601716	-1360
0.115709	0.077219	-1360
0.127013	0.142611	-1360
0.149522	0.145029	-1360
0.156334	0.173457	-1360
0.0532779	0.181135	-1360
0.0746075	0.185715	-1360
0.253505	0.197807	-1360
0.109441	0.204428	-1360
0.198663	0.204816	-1360
0.23785	0.214643	-1360
0.19004	0.217786	-1360
0.248937	0.221802	-1360
0.157524	0.229046	-1360
0.127444	0.250984	-1360
0.193924	0.252589	-1360
0.107915	0.253354	-1360
0.0757077	0.254376	-1360
0.0780183	0.265696	-1360
0.183362	0.27867	-1360
0.194832	0.291324	-1360
0.202927	0.293624	-1360
0.164268	0.311236	-1360
0.198266	0.318658	-1360
0.216818	0.402416	-1360
-0.12853	-0.281663	-1320
-0.0647716	-0.233839	-1320
-0.050629	-0.191285	-1320
-0.188009	-0.190492	-1320
-0.105602	-0.185677	-1320
-0.125185	-0.158952	-1320
0.224051	-0.0669785	-1320
0.259119	-0.0548715	-1320
-0.289271	-0.042301	-1320
0.162382	-0.0200248	-1320
0.264794	0.00743746	-1320
-0.128462	0.00861298	-1320
0.072222	0.0294221	-1320
0.230172	0.0337424	-1320
0.237278	0.0372066	-1320
0.272017	0.0429749	-1320
0.0467714	0.0561793	-1320
0.0757515	0.0717051	-1320
0.0758609	0.0938849	-1320
0.198126	0.101908	-1320
0.034086	0.104146	-1320
0.176189	0.108972	-1320
0.191482	0.110822	-1320
0.0599498	0.123545	-1320
0.262229	0.128947	-1320
0.140193	0.142296	-1320
0.154192	0.143572	-1320
0.295448	0.15275	-1320
0.272878	0.162878	-1320
0.0328717	0.17095	-1320
0.0592772	0.186838	-1320
0.118325	0.191644	-1320
0.0904397	0.194403	-1320
0.172288	0.199633	-1320
-0.188409	0.203272	-1320
0.0537611	0.206613	-1320
0.226406	0.223135	-1320
0.0952532	0.23133	-1320
0.0316896	0.233248	-1320
0.16357	0.237933	-1320
0.290093	0.238895	-1320
0.185977	0.240925	-1320
0.2112	0.254415	-1320
0.0826165	0.26116	-1320
0.093138	0.32089	-1320
0.197076	-0.307736	-1280
-0.115818	-0.281001	-1280
-0.102684	-0.262893	-1280
-0.128133	-0.244376	-1280
-0.0858549	-0.232956	-1280
-0.124311	-0.206994	-1280
-0.0920501	-0.194333	-1280
-0.0439586	-0.185044	-1280
0.0128847	-0.161613	-1280
0.257754	-0.147899	-1280
0.341227	-0.12283	-1280
-0.0906871	-0.10646	-1280
0.188542	-0.105518	-1280
0.198496	-0.0698872	-1280
-0.208943	-0.0267625	-1280
0.230405	-0.0226626	-1280
0.208413	-0.0129597	-1280
0.279764	-0.0114446	-1280
0.25267	-0.00588079	-1280
-0.0526183	-0.000447339	-1280
0.118739	0.00461715	-1280
0.175159	0.0500965	-1280
0.165394	0.0678781	-1280
0.226391	0.0698646	-1280
0.279166	0.0953067	-1280
0.064018	0.106988	-1280
0.115152	0.124655	-1280
0.0855209	0.13569	-1280
0.179133	0.13986	-1280
0.148057	0.155263	-1280
0.203833	0.164868	-1280
0.155087	0.166286	-1280
0.17978	0.168643	-1280
0.049681	0.179485	-1280
0.205029	0.186499	-1280
0.133436	0.207656	-1280
0.057111	0.21751	-1280
0.16241	0.236964	-1280
0.0914058	0.285184	-1280
-0.117802	-0.232146	-1240
-0.06522	-0.18598	-1240
-0.0357209	-0.14746	-1240
-0.204834	-0.101423	-1240
0.00430001	-0.0978982	-1240
-7.05021e-05	-0.0972914	-1240
0.00663518	-0.0746624	-1240
0.275897	-0.0685234	-1240
0.179984	-0.0591765	-1240
-0.0978255	-0.0555416	-1240
0.233647	-0.0526358	-1240
0.334612	-0.0504486	-1240
0.323095	-0.040933	-1240
0.167765	0.0139579	-1240
-0.0301747	0.0236017	-1240
-0.0471384	0.0289442	-1240
0.0586076	0.0491451	-1240
0.155852	0.0629811	-1240
0.229331	0.0695444	-1240
0.117159	0.0840987	-1240
0.183457	0.147106	-1240
0.242385	0.162986	-1240
0.172313	0.181912	-1240
0.182496	0.185112	-1240
0.154197	0.189293	-1240
0.147053	0.190911	-1240
0.176403	0.192534	-1240
0.0920047	0.199639	-1240
-0.126277	0.200543	-1240
0.138059	0.20312	-1240
0.161655	0.203967	-1240
0.0627059	0.209838	-1240
0.214477	0.217702	-1240
0.173676	0.223021	-1240
0.226543	0.225175	-1240
0.189889	0.226735	-1240
0.0642667	0.229537	-1240
0.199128	0.241553	-1240
0.0628322	0.256239	-1240
0.199283	0.269861	-1240
0.220834	0.29091	-1240
0.0590849	-0.353548	-1200
0.2973	-0.295429	-1200
-0.234939	-0.254942	-1200
-0.0826729	-0.206961	-1200
-0.232692	-0.17344	-1200
0.152828	-0.167715	-1200
0.248499	-0.138212	-1200
0.33548	-0.116403	-1200
0.310158	-0.114428	-1200
-0.0373427	-0.0849907	-1200
0.253992	-0.0767057	-1200
0.272763	-0.0632128	-1200
0.222462	-0.0614234	-1200
0.319426	-0.0571791	-1200
-0.207097	-0.0480589	-1200
0.358063	-0.0448961	-1200
0.211558	-0.0249976	-1200
0.243418	-0.0216636	-1200
0.220497	0.0306579	-1200
0.126046	0.0385973	-1200
0.063431	0.0444473	-1200
-0.215016	0.0587551	-1200
0.300198	0.0698768	-1200
0.118548	0.0888905	-1200
0.125267	0.103403	-1200
0.0953129	0.110501	-1200
0.255871	0.122124	-1200
0.163483	0.141413	-1200
0.189092	0.142541	-1200
0.142444	0.147222	-1200
0.175053	0.175776	-1200
0.110869	0.182554	-1200
0.0840287	0.20138	-1200
0.198588	0.204059	-1200
0.187463	0.218276	-1200
0.241755	0.221241	-1200
0.0567684	0.233118	-1200
0.173944	0.241241	-1200
0.219924	0.244977	-1200
0.0819477	0.25169	-1200
0.22246	0.265096	-1200
0.114118	0.299018	-1200
-0.214301	-0.212965	-1160
-0.147024	-0.202804	-1160
-0.13195	-0.169981	-1160
-0.158407	-0.169354	-1160
-0.100829	-0.136291	-1160
-0.00194301	-0.107489	-1160
-0.0506429	-0.0868677	-1160
0.155768	-0.0534029	-1160
0.237924	-0.0455952	-1160
0.232062	0.0247613	-1160
0.138146	0.0302314	-1160
0.074099	0.0304593	-1160
0.203115	0.0458068	-1160
0.301775	0.0492272	-1160
0.173294	0.0493512	-1160
0.185771	0.0685406	-1160
0.0855023	0.0762524	-1160
0.100857	0.0919228	-1160
0.135879	0.0935856	-1160
0.130309	0.109554	-1160
0.190939	0.141776	-1160
0.13561	0.164269	-1160
0.114283	0.167463	-1160
0.0636931	0.173036	-1160
0.0835642	0.17384	-1160
0.190983	0.174296	-1160
0.258211	0.190749	-1160
0.146977	0.191466	-1160
0.081228	0.191765	-1160
0.2167	0.19389	-1160
0.195337	0.24209	-1160
0.110717	0.309163	-1160
0.243245	0.37809	-1160
-0.108983	-0.242273	-1120
0.28353	-0.190438	-1120
0.289119	-0.165585	-1120
-0.0970623	-0.145086	-1120
0.288546	-0.143719	-1120
0.312024	-0.139274	-1120
0.300496	-0.120391	-1120
-0.0725698	-0.106134	-1120
0.268649	-0.0947086	-1120
0.238142	-0.0944217	-1120
-0.087324	-0.0812141	-1120
0.174967	-0.0689136	-1120
0.146272	-0.0606584	-1120
0.131178	-0.025917	-1120
0.254764	-0.0198885	-1120
0.136535	-0.0140373	-1120
0.0836386	-0.00165219	-1120
0.0545815	0.00792274	-1120
0.211672	0.011917	-1120
0.231328	0.0185368	-1120
0.115547	0.0203173	-1120
-0.138418	0.0248636	-1120
-0.0747083	0.0251591	-1120
0.134646	0.0690656	-1120
0.266979	0.0715693	-1120
0.147252	0.0748011	-1120
0.119307	0.0793741	-1120
0.00923607	0.0860581	-1120
0.093247	0.0902329	-1120
0.108171	0.0943745	-1120
0.153821	0.114358	-1120
0.211588	0.123939	-1120
0.0948113	0.129128	-1120
0.138234	0.141118	-1120
0.208197	0.167189	-1120
0.266521	0.180821	-1120
0.108321	0.188511	-1120
0.247695	0.190566	-1120
0.126677	0.192428	-1120
0.0929007	0.19596	-1120
0.214135	0.20808	-1120
0.243691	0.231348	-1120
0.123908	0.243188	-1120
0.228349	0.296543	-1120
0.25004	0.297686	-1120
0.236289	0.308058	-1120
0.235404	0.332657	-1120
0.292531	-0.187674	-1080
0.237671	-0.175216	-1080
-0.0845414	-0.150773	-1080
0.280752	-0.142999	-1080
0.299226	-0.132184	-1080
-0.0889098	-0.130607	-1080
0.177874	-0.098339	-1080
-0.0839145	-0.094323	-1080
0.247169	-0.09342	-1080
0.291789	-0.0907342	-1080
-0.102909	-0.0904443	-1080
-0.0974349	-0.0802824	-1080
0.177525	-0.0622872	-1080
0.189445	-0.0621413	-1080
0.156267	-0.0424726	-1080
-0.129471	-0.0391667	-1080
0.272254	-0.0355383	-1080
0.234987	-0.0233135	-1080
0.257328	-0.0105389	-1080
0.174142	-0.0092046	-1080
0.293501	-0.00562305	-1080
0.129729	0.0154681	-1080
0.292405	0.0217924	-1080
0.207219	0.0247483	-1080
0.240036	0.0268722	-1080
0.269485	0.0332915	-1080
0.0168659	0.0342113	-1080
0.0901995	0.0553624	-1080
0.166042	0.0563379	-1080
0.0149587	0.0653909	-1080
0.199671	0.0660512	-1080
0.0857792	0.0677133	-1080
0.233593	0.0765081	-1080
0.124985	0.0778701	-1080
0.18379	0.0795815	-1080
0.166241	0.0884807	-1080
0.207577	0.100431	-1080
0.325544	0.102713	-1080
0.193554	0.111735	-1080
0.18104	0.115101	-1080
0.230609	0.121878	-1080
0.26415	0.135022	-1080
0.228427	0.164114	-1080
0.153724	0.178623	-1080
0.184788	0.187201	-1080
0.0920079	0.187379	-1080
0.30109	0.207863	-1080
-0.162514	-0.269895	-1040
-0.0808397	-0.25304	-1040
-0.0977454	-0.175492	-1040
-0.0746653	-0.159256	-1040
-0.0694319	-0.147758	-1040
-0.0381891	-0.138275	-1040
-0.0979446	-0.133371	-1040
-0.0878102	-0.13016	-1040
-0.0425339	-0.120578	-1040
0.250616	-0.11342	-1040
-0.0491272	-0.091511	-1040
-0.001875	-0.0556403	-1040
-0.065361	-0.0440692	-1040
0.195211	-0.0182577	-1040
0.126841	-0.0178064	-1040
0.306336	0.00477934	-1040
0.282116	0.0199867	-1040
0.0933596	0.0261	-1040
0.26948	0.0446563	-1040
0.108578	0.0473956	-1040
0.11839	0.0518848	-1040
0.0126152	0.0525125	-1040
0.220295	0.0565521	-1040
0.0688358	0.0687829	-1040
0.198435	0.0737873	-1040
0.173211	0.0795799	-1040
0.136852	0.0897163	-1040
0.194136	0.108021	-1040
0.147798	0.108022	-1040
0.202675	0.109328	-1040
0.138208	0.115064	-1040
0.122394	0.1151	-1040
0.077497	0.125584	-1040
0.085542	0.134064	-1040
0.192157	0.137324	-1040
0.10022	0.16021	-1040
0.196794	0.161985	-1040
0.144391	0.190271	-1040
0.249708	0.190994	-1040
0.265943	0.195128	-1040
0.218601	0.19532	-1040
0.116944	0.207026	-1040
0.127525	0.207418	-1040
0.078179	0.210638	-1040
0.0887941	0.227968	-1040
0.210762	0.228589	-1040
0.103222	0.231865	-1040
0.214614	0.304533	-1040
0.279043	0.320605	-1040
0.265362	0.320783	-1040
-0.0901406	-0.233182	-960
-0.116991	-0.225948	-960
0.194489	-0.21909	-960
-0.1341	-0.208814	-960
-0.0667706	-0.192263	-960
-0.139719	-0.186701	-960
-0.157247	-0.17968	-960
-0.0355586	-0.160844	-960
-0.107008	-0.157082	-960
-0.03707	-0.125056	-960
-0.0664563	-0.104777	-960
0.108906	-0.0619788	-960
0.289502	0.00647385	-960
0.274807	0.0162132	-960
0.117765	0.0243921	-960
0.321188	0.0304946	-960
0.0483799	0.0306612	-960
0.14549	0.0490169	-960
0.0516282	0.0490943	-960
0.0752931	0.0607182	-960
0.206435	0.0764136	-960
0.146591	0.0766848	-960
0.0772496	0.0853234	-960
0.109008	0.102567	-960
0.0979899	0.109666	-960
0.0674816	0.116002	-960
0.0621532	0.125916	-960
0.163477	0.135614	-960
0.157117	0.140202	-960
0.26323	0.149914	-960
0.108414	0.157693	-960
0.19263	0.166359	-960
0.0470367	0.167962	-960
0.0882393	0.170041	-960
0.100262	0.171432	-960
0.30774	0.172355	-960
0.0587481	0.174482	-960
0.121849	0.175645	-960
0.156507	0.183907	-960
0.112209	0.185556	-960
0.225992	0.209635	-960
0.0642716	0.233396	-960
0.101432	0.240203	-960
0.170985	0.24674	-960
0.216539	0.275154	-960
0.210665	0.277306	-960
0.170565	0.343007	-960
0.20054	-0.337382	-920
-0.109357	-0.203074	-920
-0.127043	-0.198473	-920
-0.131111	-0.168416	-920
-0.0904837	-0.166008	-920
0.332955	0.0205447	-920
0.102742	0.0262123	-920
0.129876	0.0577381	-920
0.18962	0.0604448	-920
0.0992793	0.0713315	-920
0.109746	0.087426	-920
0.0994109	0.09966	-920
0.294584	0.104477	-920
0.188144	0.11284	-920
0.083689	0.114684	-920
-0.136833	0.131477	-920
0.129971	0.133887	-920
0.19049	0.136989	-920
0.131465	0.14791	-920
0.191746	0.162203	-920
0.216429	0.182368	-920
0.099564	0.19837	-920
0.192506	0.201296	-920
0.135726	0.202564	-920
0.0921502	0.207432	-920
-0.242425	0.20833	-920
0.267566	0.242464	-920
0.137305	0.247639	-920
0.124659	0.275441	-920
0.141968	-0.310637	-840
-0.137006	-0.261991	-840
-0.0990715	-0.245934	-840
-0.132123	-0.204504	-840
-0.039407	-0.160772	-840
-0.107706	-0.151606	-840
0.28741	-0.0991095	-840
-0.0691035	-0.0874782	-840
0.242993	-0.0692808	-840
-0.00640852	-0.0510767	-840
0.14562	0.0378236	-840
0.139202	0.0417055	-840
0.110726	0.0557617	-840
0.205709	0.0633136	-840
0.0991537	0.0652369	-840
0.0733068	0.0777424	-840
0.0563596	0.0953828	-840
0.124984	0.10065	-840
0.163166	0.111405	-840
0.0845301	0.116011	-840
0.205945	0.11962	-840
0.280279	0.123993	-840
0.0157615	0.128772	-840
0.189707	0.14478	-840
0.210337	0.150948	-840
0.285328	0.158114	-840
0.251833	0.159451	-840
0.192403	0.182111	-840
0.0768847	0.186269	-840
0.277347	0.190691	-840
0.20816	0.202731	-840
0.159995	0.203966	-840
0.226307	0.207897	-840
0.323677	0.231271	-840
0.15257	0.244608	-840
0.231698	0.256033	-840
0.251124	0.317699	-840
-0.119894	-0.271298	-800
-0.103177	-0.219024	-800
-0.129948	-0.200134	-800
-0.0423281	-0.181784	-800
-0.115484	-0.168408	-800
-0.076692	-0.155764	-800
-0.0896548	-0.155269	-800
-0.138517	-0.138605	-800
-0.150973	-0.118158	-800
-0.00567284	-0.0672517	-800
0.239307	-0.0666201	-800
0.230879	-0.0592491	-800
0.0036041	-0.0568488	-800
0.0915117	-0.00608667	-800
0.121584	0.0134031	-800
0.0639887	0.0252114	-800
0.172449	0.0302828	-800
0.116936	0.0398913	-800
0.129748	0.0617246	-800
0.0935757	0.0767558	-800
0.1264	0.0789944	-800
0.190842	0.0975843	-800
0.281178	0.107469	-800
0.208703	0.11899	-800
0.0542992	0.1216	-800
0.0803906	0.122157	-800
0.126194	0.12549	-800
0.198465	0.131449	-800
0.0666437	0.132485	-800
0.154958	0.136977	-800
0.232093	0.141037	-800
0.211029	0.145534	-800
0.171421	0.153133	-800
0.0664274	0.167935	-800
0.269466	0.168731	-800
0.133776	0.169839	-800
0.304778	0.175457	-800
0.199973	0.17682	-800
0.0784207	0.178228	-800
0.245435	0.181976	-800
0.0425342	0.182804	-800
0.172822	0.191895	-800
0.100193	0.198245	-800
0.0820458	0.201537	-800
0.218808	0.203159	-800
0.132423	0.222792	-800
0.171123	0.223885	-800
0.0616367	0.230375	-800
0.143034	0.237492	-800
0.123068	0.271276	-800
0.0981772	0.281203	-800
0.170921	-0.287423	-760
0.187458	-0.277794	-760
0.158834	-0.269693	-760
-0.168374	-0.237439	-760
0.288022	-0.188087	-760
0.282035	-0.110227	-760
0.268192	-0.0782767	-760
-0.141885	-0.0372622	-760
0.153073	-0.033626	-760
0.17762	-0.0215898	-760
-0.160039	-0.0145077	-760
0.171988	0.0200196	-760
0.156459	0.0575415	-760
0.188471	0.068001	-760
0.0982257	0.0943145	-760
0.0693286	0.10303	-760
0.0788738	0.106547	-760
0.350323	0.112466	-760
0.0429243	0.122352	-760
0.145109	0.1225	-760
0.334426	0.124209	-760
0.12222	0.126384	-760
-0.0995685	0.139455	-760
0.162862	0.146573	-760
0.123083	0.154726	-760
0.272428	0.165748	-760
0.0820129	0.172007	-760
0.0641054	0.17309	-760
0.138429	0.180084	-760
0.206273	0.181689	-760
0.160878	0.182546	-760
0.0787176	0.189541	-760
0.276944	0.195071	-760
0.0630136	0.20214	-760
0.204135	0.211828	-760
0.0844359	0.221603	-760
0.044114	0.228091	-760
0.27034	0.233895	-760
-0.191896	0.235512	-760
0.14547	0.236858	-760
0.156759	0.258489	-760
0.214953	0.271363	-760
0.226138	0.320233	-760
0.19291	0.327337	-760
0.259523	0.341319	-760
0.164618	-0.345028	-720
0.12389	-0.339696	-720
0.0978571	-0.33842	-720
0.130864	-0.321653	-720
0.0981162	-0.303348	-720
0.159163	-0.276742	-720
-0.106644	-0.254064	-720
0.156461	-0.246295	-720
0.188119	-0.239756	-720
0.144686	-0.224949	-720
-0.0977856	-0.220946	-720
-0.152933	-0.214641	-720
-0.0819168	-0.173427	-720
0.266256	-0.154824	-720
0.242706	-0.144225	-720
0.0909246	-0.132686	-720
0.173555	-0.0993573	-720
0.253233	-0.0940015	-720
0.18602	-0.0740834	-720
0.0609316	-0.0656799	-720
0.236141	-0.0523123	-720
0.183355	-0.0221533	-720
0.165488	-0.0162632	-720
0.123481	-0.00485097	-720
0.164636	-0.000247324	-720
0.188637	0.0191812	-720
0.157322	0.0512646	-720
0.105521	0.0609334	-720
0.0937364	0.0631528	-720
0.152323	0.0673481	-720
0.156728	0.0929799	-720
0.166275	0.109383	-720
0.0726386	0.114004	-720
-0.136985	0.12142	-720
0.225385	0.126504	-720
0.0987528	0.136673	-720
0.177916	0.163075	-720
0.207609	0.168945	-720
0.247476	0.169857	-720
0.0689634	0.172174	-720
0.218241	0.19184	-720
0.18479	0.198735	-720
0.221499	0.215759	-720
0.167633	0.228555	-720
0.131494	0.240231	-720
0.11508	0.240952	-720
0.217593	0.245146	-720
0.18256	0.260998	-720
0.214661	0.294919	-720
0.227678	-0.332546	-680
0.141946	-0.289795	-680
0.108496	-0.270288	-680
0.12954	-0.251106	-680
0.22493	-0.221009	-680
-0.187911	-0.191936	-680
-0.0909598	-0.191703	-680
-0.106967	-0.174779	-680
0.276816	-0.126347	-680
-0.121304	-0.104308	-680
-0.0956917	-0.0975913	-680
-0.0537076	-0.0946781	-680
0.121313	-0.0935493	-680
-0.00162246	-0.0756769	-680
0.163981	-0.0294563	-680
-0.117837	-0.0243962	-680
0.262804	-0.0111964	-680
0.284569	0.00782094	-680
0.0451295	0.0098522	-680
0.111511	0.0376096	-680
0.00727964	0.0569156	-680
0.124791	0.0608129	-680
0.165596	0.0633862	-680
0.146328	0.0699449	-680
0.177285	0.075545	-680
0.093205	0.0987357	-680
0.17549	0.11051	-680
0.231004	0.110659	-680
0.080554	0.122361	-680
-0.133282	0.126266	-680
0.109469	0.130594	-680
0.175615	0.160477	-680
0.105224	0.167533	-680
0.168859	0.172766	-680
0.135245	0.177542	-680
0.189176	0.181393	-680
0.20854	0.221654	-680
0.142391	0.235144	-680
0.2984	0.235785	-680
0.106418	0.236179	-680
0.206706	0.246331	-680
0.21469	0.247357	-680
0.271141	0.248799	-680
0.112851	0.27997	-680
0.226728	-0.463191	-600
0.2073	-0.459277	-600
-0.0987054	-0.274216	-600
-0.138755	-0.246794	-600
-0.153213	-0.245853	-600
-0.0837567	-0.231286	-600
0.201768	-0.210083	-600
0.041328	-0.166686	-600
-0.0684473	-0.131447	-600
-0.137068	-0.101522	-600
0.000981029	-0.0753537	-600
0.313715	-0.0509136	-600
0.289413	-0.0259336	-600
0.213949	-0.0148579	-600
0.301071	-0.0140572	-600
0.102052	-0.00846646	-600
0.158182	-0.0016888	-600
0.229731	0.0246287	-600
0.0523738	0.0306832	-600
0.141401	0.0361038	-600
0.155162	0.0363997	-600
0.0626067	0.0464813	-600
0.107427	0.0562987	-600
-0.0751649	0.0613739	-600
0.154829	0.0775267	-600
0.0162014	0.079221	-600
0.18873	0.0977381	-600
0.116113	0.10981	-600
0.16748	0.117135	-600
0.0758317	0.134449	-600
0.179629	0.141577	-600
0.187141	0.148503	-600
0.167687	0.163432	-600
-0.182838	0.176594	-600
0.0777694	0.180008	-600
0.183325	0.192415	-600
0.196648	0.200914	-600
0.0872068	0.201385	-600
0.192387	0.214295	-600
0.145629	0.232187	-600
0.0766131	0.238978	-600
0.141783	0.384211	-600
0.201751	-0.343665	-560
0.195706	-0.310768	-560
0.183545	-0.283068	-560
0.234661	-0.273763	-560
0.192562	-0.273179	-560
-0.0722408	-0.229568	-560
0.204284	-0.220758	-560
0.15298	-0.142215	-560
0.174555	-0.127968	-560
-0.0705306	-0.121658	-560
0.246745	-0.0611348	-560
0.285637	-0.051358	-560
0.150918	-0.0227711	-560
0.18522	-0.0225358	-560
0.200432	-0.00382739	-560
0.325954	0.00668211	-560
0.345145	0.0150428	-560
0.212571	0.018374	-560
-0.114486	0.0194668	-560
0.130136	0.0227495	-560
0.379327	0.0235159	-560
0.161188	0.0252647	-560
0.20613	0.0334304	-560
0.143032	0.0340817	-560
0.0516578	0.0610612	-560
0.119938	0.0681488	-560
0.368947	0.0723438	-560
0.150576	0.0783174	-560
0.136119	0.0836733	-560
0.184224	0.0888658	-560
0.108763	0.100413	-560
0.0156829	0.101832	-560
0.0657922	0.103718	-560
0.121046	0.108425	-560
0.136704	0.11584	-560
0.185118	0.124242	-560
0.088324	0.125278	-560
0.0809122	0.126131	-560
0.1315	0.139844	-560
0.129418	0.158552	-560
0.173112	0.175322	-560
0.0645364	0.177212	-560
0.0517441	0.178838	-560
0.161752	0.185245	-560
0.146689	0.198039	-560
0.117451	0.204356	-560
0.166955	0.217849	-560
0.0254669	0.225552	-560
0.195956	0.227579	-560
0.181814	0.239147	-560
0.209097	0.240936	-560
0.0625725	0.254295	-560
0.138665	0.254493	-560
0.117892	0.258072	-560
0.109227	0.277917	-560
0.0927796	0.282711	-560
0.250791	0.309171	-560
0.239677	0.312326	-560
0.23138	-0.335402	-520
0.216244	-0.332909	-520
0.168723	-0.314319	-520
0.228396	-0.313083	-520
0.202854	-0.293907	-520
0.252145	-0.204199	-520
0.247942	-0.135382	-520
-0.159533	-0.131831	-520
0.0884743	-0.130895	-520
0.203238	-0.0918633	-520
0.232591	-0.0692345	-520
-0.00532989	-0.0622791	-520
0.260703	-0.0574482	-520
0.231438	-0.0463258	-520
0.0484742	-0.0439724	-520
-0.100603	-0.0280961	-520
0.156869	-0.0274466	-520
0.172407	-0.0128791	-520
0.0731651	-0.00411262	-520
0.332156	-0.0011293	-520
0.313261	0.00393198	-520
0.0911448	0.00499695	-520
0.139422	0.00993274	-520
0.336342	0.0147145	-520
0.0479261	0.0217223	-520
0.196885	0.0237276	-520
0.0602686	0.0292359	-520
0.133473	0.0332862	-520
0.22042	0.0539938	-520
0.250045	0.0545083	-520
0.108127	0.0643935	-520
0.0613134	0.0939004	-520
0.102833	0.0948675	-520
0.21673	0.0949502	-520
0.325488	0.0963473	-520
0.138182	0.0981622	-520
0.0906926	0.103765	-520
0.106196	0.112836	-520
0.0807054	0.114875	-520
0.0661099	0.115236	-520
0.377274	0.124946	-520
0.178234	0.130957	-520
0.13848	0.139991	-520
0.0723626	0.144048	-520
0.0999579	0.15713	-520
0.0761272	0.158998	-520
0.0594282	0.165991	-520
0.161194	0.176884	-520
0.190807	0.177895	-520
0.159973	0.190371	-520
0.142074	0.194675	-520
0.185191	0.216508	-520
0.134581	0.221935	-520
0.0882507	0.228742	-520
0.213125	0.233577	-520
0.185284	0.242531	-520
0.214117	0.2462	-520
0.121953	0.266065	-520
0.281219	0.331504	-520
-0.155977	-0.297264	-480
-0.143588	-0.247378	-480
-0.13342	-0.218995	-480
-0.0620865	-0.192173	-480
-0.0644454	-0.169923	-480
-0.0756621	-0.160632	-480
0.0916048	-0.15321	-480
-0.0878733	-0.139037	-480
0.131008	-0.108358	-480
-0.104952	-0.103904	-480
-0.114825	-0.0510071	-480
0.0132178	-0.0116394	-480
0.143717	0.0159306	-480
0.12782	0.0237593	-480
0.400612	0.025288	-480
0.114142	0.0542833	-480
0.158008	0.0625935	-480
0.0641309	0.0630981	-480
0.124749	0.0732618	-480
0.189673	0.0844473	-480
0.413606	0.0883134	-480
0.360595	0.100336	-480
0.104336	0.123041	-480
0.056125	0.124543	-480
0.151074	0.130241	-480
0.172573	0.143708	-480
0.242843	0.147658	-480
0.137154	0.151062	-480
0.0934001	0.156136	-480
0.196972	0.17119	-480
0.351968	0.18221	-480
0.119194	0.18512	-480
0.154505	0.187176	-480
0.137778	0.187526	-480
0.0944374	0.187716	-480
0.348151	0.19542	-480
0.169804	0.197334	-480
0.143703	0.209014	-480
0.0533796	0.228482	-480
0.205299	0.236422	-480
0.132373	0.236683	-480
0.208755	0.255018	-480
0.25151	0.259818	-480
0.195176	0.271778	-480
0.29244	0.280121	-480
0.169411	0.285265	-480
0.240835	0.293237	-480
0.220695	0.307433	-480
0.171799	0.343608	-480
-0.109328	-0.240207	-440
0.208506	-0.229264	-440
0.307118	-0.218209	-440
-0.119601	-0.201323	-440
-0.045556	-0.183756	-440
0.0556395	-0.118401	-440
-0.100185	-0.0934582	-440
0.190596	0.0241376	-440
0.217778	0.0252172	-440
0.123326	0.0262133	-440
0.131992	0.0765457	-440
0.351553	0.0958185	-440
0.218473	0.105514	-440
0.151008	0.11304	-440
0.368233	0.120151	-440
0.101704	0.121125	-440
0.199766	0.131492	-440
0.169934	0.139786	-440
0.2921	0.158473	-440
0.103596	0.160411	-440
0.113937	0.162377	-440
0.350345	0.16643	-440
0.0558253	0.170496	-440
0.378792	0.177948	-440
0.129316	0.201144	-440
0.107243	0.213116	-440
0.357446	0.214861	-440
0.164467	0.221959	-440
0.345125	0.23057	-440
0.148479	0.237174	-440
0.053765	0.243964	-440
0.170257	0.246629	-440
0.137022	0.248223	-440
0.079066	0.255161	-440
0.200689	0.268998	-440
0.0488294	0.275383	-440
0.140744	0.27669	-440
0.184248	0.280543	-440
0.156618	0.291241	-440
0.0964876	0.301059	-440
0.32578	0.309355	-440
0.163489	0.32677	-440
0.210448	0.326783	-440
0.222278	0.409507	-440
-0.160643	-0.214051	-400
-0.151374	-0.186734	-400
-0.130399	-0.162732	-400
0.0554912	-0.146583	-400
-0.0467457	-0.125353	-400
-0.146853	-0.125181	-400
-0.0857823	-0.110754	-400
0.216285	-0.106073	-400
0.156345	-0.0369094	-400
0.335124	-0.0324976	-400
0.383457	-0.00539797	-400
0.259397	0.011513	-400
0.135024	0.0243455	-400
0.336998	0.0262398	-400
0.174114	0.039124	-400
0.182905	0.0497945	-400
0.311333	0.0604523	-400
0.29678	0.0613311	-400
0.362845	0.0659374	-400
0.313011	0.0766622	-400
0.339118	0.07958	-400
-0.134422	0.0856714	-400
0.353418	0.0859984	-400
0.113578	0.0929532	-400
0.13128	0.104654	-400
0.244773	0.105989	-400
0.351707	0.107925	-400
0.294891	0.111971	-400
0.198535	0.120224	-400
0.115629	0.120502	-400
0.181926	0.131729	-400
0.362025	0.133437	-400
0.108052	0.144408	-400
0.178173	0.150867	-400
0.16469	0.154389	-400
0.12468	0.154729	-400
0.195782	0.162264	-400
0.201897	0.170506	-400
0.132569	0.186477	-400
0.25157	0.187532	-400
0.0930137	0.187828	-400
0.196354	0.200998	-400
0.115626	0.221153	-400
0.234996	0.252162	-400
0.169052	0.279965	-400
0.0867335	0.287586	-400
0.246921	0.288463	-400
0.269663	0.324007	-400
0.146818	0.354138	-400
0.226299	-0.316121	-360
0.256698	-0.313312	-360
0.213675	-0.280977	-360
0.226051	-0.258948	-360
-0.156746	-0.22736	-360
-0.0825965	-0.2104	-360
-0.108067	-0.20863	-360
-0.140061	-0.151192	-360
-0.0675884	-0.0873768	-360
0.0405516	-0.0506706	-360
0.125639	-0.0289863	-360
0.0453397	0.0232805	-360
0.204664	0.0264054	-360
0.373802	0.0298368	-360
0.0548596	0.0408186	-360
0.371943	0.0623559	-360
0.239948	0.0631944	-360
0.0165307	0.0728427	-360
0.218062	0.0814719	-360
0.187905	0.0874421	-360
-0.0609734	0.0943142	-360
0.123263	0.0946627	-360
0.174951	0.100548	-360
0.347971	0.10123	-360
0.156087	0.101741	-360
0.357826	0.109226	-360
0.211622	0.127015	-360
0.330938	0.144236	-360
0.25211	0.170489	-360
0.188941	0.176247	-360
0.343249	0.178208	-360
0.181667	0.183323	-360
0.101227	0.196645	-360
0.0825702	0.19919	-360
0.0871305	0.228708	-360
0.237878	0.233622	-360
0.205494	0.237127	-360
0.187041	0.253193	-360
0.183603	0.343636	-360
0.16928	0.344979	-360
0.261215	-0.317776	-320
0.339971	-0.283769	-320
0.221748	-0.276066	-320
-0.1257	-0.260742	-320
-0.136637	-0.256158	-320
0.233676	-0.253435	-320
-0.215698	-0.24421	-320
-0.177419	-0.233221	-320
-0.19144	-0.206169	-320
-0.106214	-0.20375	-320
-0.104924	-0.185076	-320
-0.0834707	-0.152297	-320
-0.10691	-0.0875815	-320
0.243743	-0.0811869	-320
0.223432	-0.0602314	-320
-0.124003	-0.0456083	-320
0.171686	-0.0229368	-320
0.194191	-0.0022971	-320
0.0958088	0.0199949	-320
0.187029	0.0909157	-320
0.0938197	0.0991925	-320
0.253768	0.100611	-320
0.176954	0.114679	-320
0.116056	0.116041	-320
0.0902905	0.122506	-320
0.280865	0.150344	-320
0.154267	0.171549	-320
0.172068	0.172464	-320
0.19415	0.188914	-320
0.202225	0.21156	-320
0.213786	0.226543	-320
-0.209001	0.233131	-320
0.184084	0.365191	-320
0.201063	0.401759	-320
-0.122252	-0.312789	-280
-0.137456	-0.309173	-280
0.242075	-0.303179	-280
0.269359	-0.287271	-280
-0.128422	-0.274095	-280
-0.170178	-0.255336	-280
-0.110542	-0.220264	-280
-0.189081	-0.220106	-280
0.2302	-0.195107	-280
0.149262	-0.167115	-280
-0.207194	-0.110131	-280
-0.111493	-0.071491	-280
-0.149119	-0.0202687	-280
0.19612	-0.00969572	-280
-0.108912	0.00582999	-280
0.244852	0.0185617	-280
0.221469	0.0240471	-280
0.255468	0.0405348	-280
0.127469	0.0871314	-280
0.155193	0.0981873	-280
0.138664	0.100995	-280
0.293379	0.110787	-280
0.18031	0.116852	-280
0.12066	0.124509	-280
0.164224	0.131835	-280
0.112635	0.13816	-280
0.0460116	0.149316	-280
0.263931	0.166346	-280
0.265398	0.20383	-280
0.202822	0.216951	-280
0.164968	0.217222	-280
0.210374	0.224356	-280
0.115321	0.229891	-280
0.0827576	0.232042	-280
0.114694	0.263472	-280
0.210535	0.267001	-280
0.151382	0.273946	-280
0.184128	0.290335	-280
0.219462	0.313044	-280
-0.165724	-0.310466	-240
-0.273913	-0.299735	-240
-0.137162	-0.285685	-240
0.19382	-0.277475	-240
-0.132133	-0.2698	-240
-0.151785	-0.253135	-240
-0.10801	-0.23639	-240
-0.134889	-0.235989	-240
-0.0695506	-0.184546	-240
-0.0827224	-0.177777	-240
0.198225	-0.122248	-240
-0.142586	-0.0950846	-240
0.228305	-0.0949968	-240
-0.0660951	-0.0877913	-240
-0.180259	0.0139944	-240
0.215028	0.0196946	-240
0.143883	0.0303696	-240
-0.0980509	0.039544	-240
0.215223	0.0424387	-240
0.185986	0.0530766	-240
0.312702	0.0661743	-240
0.348092	0.0924202	-240
0.129481	0.102371	-240
0.158099	0.136678	-240
0.15717	0.147613	-240
0.22431	0.157146	-240
0.145978	0.197235	-240
0.206796	0.197326	-240
0.0801283	0.209722	-240
0.207353	0.243051	-240
0.244511	0.275619	-240
0.284418	-0.401635	-160
0.203371	-0.334483	-160
0.356668	-0.331876	-160
0.247017	-0.320127	-160
0.22608	-0.295158	-160
0.197549	-0.262606	-160
-0.275376	-0.240507	-160
0.230715	-0.223782	-160
-0.0809122	-0.187682	-160
0.0986029	-0.126887	-160
0.24292	-0.0976407	-160
0.184908	-0.0684327	-160
0.165788	-0.059515	-160
0.217972	-0.056576	-160
-0.179671	-0.0101307	-160
0.161219	0.00540371	-160
0.224192	0.0141311	-160
0.179519	0.0276053	-160
0.262691	0.0441643	-160
0.148212	0.0648297	-160
0.163998	0.0755065	-160
0.282373	0.0871532	-160
0.121257	0.120431	-160
0.215401	0.144972	-160
0.249589	0.165297	-160
0.226138	0.182897	-160
0.206188	0.189697	-160
0.105766	0.197474	-160
-0.243694	0.218344	-160
0.175838	0.244915	-160
0.135538	0.288027	-160
-0.29667	-0.373352	-120
-0.222741	-0.352176	-120
0.191458	-0.293672	-120
0.214346	-0.258101	-120
-0.138973	-0.234151	-120
-0.167985	-0.228339	-120
-0.207894	-0.20654	-120
-0.168403	-0.184855	-120
0.226379	-0.1805	-120
0.306789	-0.168659	-120
0.179124	-0.132796	-120
0.181371	-0.0831964	-120
0.252038	-0.0183065	-120
0.205341	0.00588694	-120
-0.0504499	0.0293776	-120
0.246165	0.0468817	-120
-0.233146	0.0934267	-120
0.236136	0.095706	-120
0.158685	0.114515	-120
0.288739	0.126344	-120
0.159397	0.142838	-120
0.228323	0.15422	-120
0.121346	0.156057	-120
0.153516	0.190802	-120
0.121052	0.207281	-120
0.294788	0.21671	-120
0.143507	0.225513	-120
0.170373	0.225737	-120
0.278187	0.238805	-120
0.0931436	0.243154	-120
0.0854554	0.254509	-120
0.120525	0.267507	-120
0.175103	0.308242	-120
-0.288411	-0.359796	-80
-0.149086	-0.347936	-80
-0.223919	-0.277411	-80
-0.0741936	-0.252327	-80
0.246662	-0.235153	-80
-0.159652	-0.232721	-80
-0.0704774	-0.222682	-80
-0.162424	-0.198627	-80
0.217592	-0.170266	-80
0.285576	-0.156929	-80
-0.0160847	-0.0965203	-80
0.0075016	-0.0457294	-80
0.246552	-0.0151587	-80
0.210788	-0.00630063	-80
0.0258498	-0.00326459	-80
0.205366	0.023509	-80
0.120886	0.0339674	-80
0.163958	0.102957	-80
0.23462	0.107861	-80
0.206418	0.115568	-80
0.156601	0.130287	-80
0.190322	0.154938	-80
0.134103	0.162546	-80
0.207537	0.172333	-80
0.0927523	0.183556	-80
0.222676	0.204385	-80
0.138812	0.215852	-80
-0.219752	0.226864	-80
0.173291	0.233848	-80
-0.166066	0.261481	-80
0.241863	0.295613	-80
0.14946	0.415553	-80
-0.180889	-0.346742	0
-0.205163	-0.334928	0
0.200655	-0.318328	0
-0.209739	-0.296584	0
-0.160515	-0.290417	0
-0.202819	-0.281842	0
-0.125296	-0.244372	0
0.135083	-0.238775	0
-0.174626	-0.220774	0
-0.123064	-0.215697	0
-0.168081	-0.170258	0
-0.155263	-0.153258	0
-0.172003	-0.130817	0
0.207418	-0.10027	0
0.0546794	-0.0695881	0
-0.198524	-0.0432311	0
0.151311	-0.00271288	0
0.179372	0.0296527	0
0.217404	0.0308914	0
0.053598	0.031444	0
0.28379	0.0431278	0
0.21708	0.0637526	0
0.233711	0.0889279	0
0.129233	0.109883	0
0.15906	0.110306	0
0.0940557	0.119437	0
0.20831	0.131376	0
0.0267047	0.144797	0
0.174418	0.147757	0
0.102166	0.157147	0
0.137165	0.168868	0
0.190344	0.197114	0
0.172135	0.203672	0
0.237274	0.262913	0
-0.2174	-0.330003	40
0.196642	-0.306201	40
-0.225445	-0.286792	40
0.233614	-0.286757	40
-0.167339	-0.277421	40
0.221659	-0.273652	40
0.0112246	-0.22124	40
-0.156712	-0.16489	40
-0.046321	-0.131126	40
-0.170936	-0.126716	40
-0.184814	-0.118446	40
0.340775	-0.109611	40
-0.131079	-0.109364	40
0.237056	0.00747712	40
-0.246167	0.0512841	40
0.222806	0.0793265	40
0.256088	0.0888313	40
0.11283	0.120025	40
0.281642	0.133454	40
0.158954	0.137538	40
0.153683	0.15233	40
0.119424	0.175765	40
0.0877328	0.179772	40
0.154188	0.186773	40
0.113333	0.260477	40
0.138678	0.261048	40
0.131307	0.280372	40
-0.114211	-0.30851	80
-0.0950327	-0.284873	80
-0.157474	-0.27082	80
0.21753	-0.216363	80
0.396649	-0.149936	80
0.268358	-0.0835546	80
0.163633	-0.0448941	80
0.273426	-0.0396289	80
0.266059	-0.00314731	80
0.220209	0.0427233	80
-0.0853663	0.108591	80
-0.113757	0.138244	80
0.193512	0.208593	80
0.176702	0.208611	80
0.148632	0.238139	80
0.181363	0.242954	80
0.0850963	0.297506	80
0.179706	0.305794	80
-0.167409	-0.442314	120
-0.0896269	-0.244046	120
-0.137381	-0.233489	120
-0.0959808	-0.22184	120
-0.0980198	-0.20166	120
-0.0934043	-0.171481	120
0.21951	-0.0720422	120
0.295159	-0.00329509	120
0.0940445	0.0654969	120
0.263655	0.0678774	120
-0.0494035	0.0722273	120
0.217633	0.0970916	120
0.275576	0.104067	120
0.0350807	0.152214	120
0.165846	0.162976	120
0.111393	0.195476	120
0.145697	0.253064	120
0.130162	0.274243	120
0.21509	0.330966	120
0.214865	0.364489	120
0.189801	-0.365892	160
0.288436	-0.240382	160
0.0756135	-0.175898	160
0.287733	-0.163925	160
-0.105077	-0.16038	160
-0.163398	-0.147915	160
-0.12883	-0.135123	160
-0.100049	-0.12419	160
0.194506	-0.0603387	160
0.173429	-0.0484743	160
0.0613104	-0.00161803	160
0.0932169	0.0214793	160
0.229382	0.0369006	160
-0.0550694	0.0403719	160
0.217677	0.0757663	160
0.136182	0.089165	160
0.167272	0.0960715	160
0.0691542	0.160617	160
-0.0894006	-0.224614	200
-0.122645	-0.209893	200
0.246085	-0.128514	200
0.355004	-0.127921	200
0.321438	-0.0770249	200
-0.0980619	-0.0681534	200
0.256532	-0.0276168	200
-0.0867889	-0.00842531	200
0.172827	0.0219196	200
0.119625	0.0268041	200
0.251346	0.0507619	200
-0.274923	0.0564175	200
0.15505	0.0564977	200
0.134493	0.116666	200
0.245319	0.130716	200
0.273004	0.148777	200
0.24759	0.14954	200
0.150637	0.153093	200
0.196319	0.30854	200
0.301585	-0.384139	280
0.143904	-0.321976	280
0.179263	-0.279172	280
-0.107669	-0.194022	280
-0.201428	-0.173954	280
-0.178479	-0.150001	280
-0.162968	-0.06643	280
0.212021	0.00264488	280
-0.10938	0.0147782	280
0.274493	0.0603068	280
0.164562	0.0706067	280
0.213388	0.0786986	280
0.25975	0.102024	280
-0.135437	0.121862	280
-0.0925664	0.204487	280
0.155115	0.219011	280
0.237249	0.220329	280
0.217902	-0.357327	320
0.195797	-0.326209	320
0.157175	-0.252161	320
-0.256923	-0.250728	320
0.345054	-0.215787	320
-0.107447	-0.173169	320
-0.20841	-0.1582	320
-0.171449	-0.141014	320
0.32977	-0.0697896	320
0.122717	0.0186521	320
0.213084	0.115203	320
0.168917	0.126956	320
0.206199	0.146155	320
-0.104194	0.193177	320
0.169106	0.213991	320
0.190936	0.232663	320
0.121689	0.289824	320
-0.0990335	0.380983	320
0.238753	-0.311677	360
0.332355	-0.232311	360
0.245171	-0.214851	360
-0.142089	-0.207988	360
-0.230168	-0.191772	360
-0.0737518	-0.176349	360
0.281153	-0.165652	360
0.373042	-0.149936	360
0.331592	-0.145604	360
-0.173254	-0.115235	360
0.297035	-0.0862103	360
0.227868	0.0067328	360
0.150748	0.0591386	360
0.127453	0.172172	360
0.152549	0.198724	360
-0.229996	-0.306128	400
-0.145662	-0.273916	400
-0.140408	-0.230987	400
0.256683	-0.215528	400
-0.137294	-0.197763	400
0.307891	-0.193591	400
0.255351	-0.180138	400
0.246145	-0.15193	400
-0.0920378	-0.130761	400
0.390477	-0.0926638	400
0.1719	0.0359303	400
0.178281	0.0662749	400
0.27298	0.091196	400
0.326699	0.103271	400
0.364521	0.113346	400
0.340898	0.149054	400
0.155288	0.151376	400
0.0840121	0.194748	400
0.128746	0.248905	400
0.228931	-0.26659	440
-0.264508	-0.159033	440
0.34045	-0.151759	440
0.348575	-0.134048	440
-0.0698858	-0.119106	440
0.298374	-0.0587085	440
0.313622	-0.0467797	440
0.243043	0.01613	440
0.319679	0.0544796	440
0.283586	0.0554226	440
0.294932	0.0685335	440
0.27367	0.0830092	440
0.143271	0.118253	440
0.133572	0.14856	440
-0.215116	0.174498	440
0.0753533	0.185292	440
0.160886	0.189178	440
-0.146561	-0.247162	480
0.17863	-0.214471	480
0.289267	-0.203197	480
-0.266509	-0.183541	480
-0.147166	-0.157821	480
0.251136	-0.0834865	480
0.205456	0.0925766	480
0.253576	0.103173	480
0.159385	0.202218	480
0.241819	0.223485	480
0.180899	0.324242	480
0.284114	0.412846	480
-0.228332	-0.328024	520
0.20168	-0.124961	520
-0.299636	-0.088204	520
0.307561	-0.00347178	520
-0.220961	0.115709	520
0.141558	0.117772	520
0.0371087	0.137255	520
-0.108827	0.190923	520
-0.220514	-0.260065	560
-0.131189	-0.225032	560
-0.159292	-0.210569	560
-0.185638	-0.201844	560
-0.125032	-0.175528	560
0.212819	0.0196304	560
0.254461	0.0981923	560
0.166843	0.144126	560
0.211727	0.235071	560
-0.145425	-0.235554	600
0.313578	-0.213204	600
0.2198	-0.209246	600
-0.293772	-0.192606	600
-0.229984	-0.161812	600
-0.138891	-0.157498	600
0.372347	-0.139521	600
-0.26876	-0.137856	600
-0.251308	-0.10942	600
-0.272252	-0.0894752	600
0.20272	-0.0761013	600
-0.0550933	-0.0739124	600
0.25608	0.0941149	600
0.0989482	0.159974	600
-0.13812	-0.161614	760
0.352658	-0.0430212	760
0.292826	-0.0228284	760
0.154211	0.106112	760
-0.271941	0.172082	760
-0.0896275	-0.200629	800
-0.237022	-0.200609	800
-0.270606	-0.161808	800
0.186701	-0.151077	800
0.342115	-0.145915	800
0.151397	-0.0901581	800
0.282968	0.0338916	800
0.0751459	0.125669	800
0.192975	0.171551	800
-0.214562	0.236872	800
-0.250151	-0.217693	880
-0.197856	-0.172284	880
-0.108094	-0.169289	880
-0.238614	-0.137985	880
0.111283	-0.0124764	880
0.18215	0.334445	880
-0.24226	-0.308774	920
0.195877	-0.256635	920
-0.165801	-0.212818	920
0.297749	-0.189315	920
-0.230918	-0.176572	920
-0.305541	-0.164809	920
0.184064	-0.0687203	920
-0.242861	-0.0664268	920
0.279398	0.131376	920
0.228941	0.132414	920
0.171335	-0.267907	960
-0.262282	-0.193595	960
0.3615	-0.144919	960
-0.122158	-0.136279	960
0.217134	0.0506333	960
0.168594	0.0543092	960
0.275795	0.11045	960
-0.193018	0.200985	960
0.214515	0.222198	960

## Sheet: Sheet2
0.346293	-0.282339	-1640
0.301937	-0.186398	440
0.27999	-0.186366	560
0.357836	-0.176858	-1320
0.365448	-0.16985	-960
0.217427	-0.169732	840
0.350349	-0.154611	-920
0.308406	-0.139661	-440
0.274652	-0.129136	840
0.325344	-0.119509	320
0.276046	-0.119501	280
0.29165	-0.109019	-880
0.326134	-0.107449	1200
0.318144	-0.104301	-920
0.323831	-0.0976841	840
0.287266	-0.0939464	-1120
0.327369	-0.092376	-1000
0.290753	-0.0902586	440
0.33706	-0.0893838	-1640
0.224409	-0.0818557	-1040
0.282848	-0.0783592	-440
0.354341	-0.0724398	-1400
0.365388	-0.0721053	-1520
0.285409	-0.0601896	-920
0.294185	-0.0498812	-880
0.339199	-0.0454875	280
0.305887	-0.043162	-920
0.371089	-0.0400313	-1000
0.28101	-0.0319426	-1040
0.260751	-0.0247606	-360
0.260942	-0.008242	760
