# Supplementary material for: Spinal premotor interneurons controlling antagonistic muscles are spatially intermingled
Source: eLife. 2022 Dec 13;11:e81976. doi: 10.7554/eLife.81976 (PMC9844990; doi:10.7554/eLife.81976)
Supplement: Figure 12—figure supplement 11—source data 2. [file elife-81976-fig12-figsupp11-data2.xlsx]

## Sheet: Sheet1
0.344189	-0.100051	-1500
0.00397627	-0.0695912	-1500
0.269338	0.0568925	-1500
0.190293	0.106099	-1500
0.172314	0.141347	-1500
0.22561	0.219187	-1500
0.303028	-0.19621	-1460
0.0792846	0.152552	-1460
0.349156	-0.376177	-1420
0.149072	0.126576	-1420
0.0638679	0.179011	-1420
0.192593	0.187656	-1420
0.200047	0.22329	-1420
0.207061	-0.231698	-1380
0.291105	-0.0221282	-1380
0.203996	0.0049519	-1380
0.187719	0.0675998	-1380
0.243207	0.0760573	-1380
0.137027	0.168573	-1380
0.273476	-0.400306	-1340
0.215491	-0.367448	-1340
0.199675	-0.361991	-1340
0.176552	0.133135	-1340
0.176712	0.198321	-1340
0.224487	-0.299991	-1300
0.339092	-0.0976738	-1300
0.368939	-0.172678	-1260
0.216414	-0.141558	-1260
0.235183	0.0108318	-1260
0.138219	0.0344247	-1260
0.213165	0.13816	-1260
0.239429	-0.430531	-1220
0.193989	-0.337137	-1220
0.210015	-0.252727	-1220
0.261676	-0.226376	-1220
0.239241	-0.202779	-1220
0.302398	-0.0722991	-1220
0.262167	-0.0128111	-1220
0.225613	0.129865	-1220
0.270517	0.163617	-1220
0.218602	-0.405664	-1180
0.253375	-0.203474	-1180
0.256601	-0.0552005	-1180
0.342535	0.0116307	-1180
0.18793	0.0906552	-1180
0.168545	0.219104	-1180
0.272572	-0.394086	-1140
0.234849	-0.337558	-1140
0.189666	-0.22463	-1140
0.36293	-0.197753	-1140
0.256841	-0.0580071	-1140
0.110682	-0.0317039	-1140
0.179657	0.0423799	-1140
0.112521	0.0504813	-1140
0.183948	0.071769	-1140
0.217644	-0.381982	-1100
0.195106	-0.282214	-1100
0.190517	-0.152401	-1100
0.287811	-0.00165913	-1100
0.115412	0.0340544	-1100
0.182587	0.062611	-1100
0.277179	-0.478922	-1060
0.257217	-0.420623	-1060
0.188248	-0.416097	-1060
0.180034	-0.301258	-1060
0.172464	-0.250591	-1060
0.206518	-0.106499	-1060
0.0758651	0.0167735	-1060
0.200054	0.0365604	-1060
0.0849435	0.0644177	-1060
0.239293	0.0789341	-1060
0.140655	0.194008	-1060
0.207091	-0.361987	-1020
0.208948	-0.298811	-1020
0.25156	-0.200808	-1020
0.212275	-0.0471961	-1020
0.213481	0.0475517	-1020
0.197893	0.103876	-1020
0.271172	0.134137	-1020
0.188111	0.144122	-1020
0.268309	0.160771	-1020
0.242439	-0.292354	-980
0.222756	-0.291762	-980
0.238238	-0.270905	-980
0.0559904	0.0280742	-980
0.208707	0.104766	-980
0.192159	0.151619	-980
0.177562	0.172141	-980
0.226705	0.208017	-980
0.212934	-0.233588	-900
0.283026	-0.0527451	-900
0.124238	-0.0217492	-900
0.180507	-0.011453	-900
0.155554	0.0486936	-900
0.163788	0.0504391	-900
0.200683	0.0845048	-900
0.196712	-0.154993	-860
0.297959	-0.0725368	-860
0.218964	-0.0234801	-860
0.319959	0.01154	-860
0.122266	0.0287828	-860
0.304145	0.0302721	-860
0.128961	0.0645139	-860
0.0835138	0.124304	-860
0.136341	0.177207	-860
0.226938	0.210786	-860
0.258162	-0.385435	-820
0.220758	-0.352526	-820
0.222142	-0.337123	-820
0.231087	-0.292494	-820
0.305878	-0.22946	-820
0.199697	-0.194872	-820
0.286645	-0.0668063	-820
0.191509	-0.0577463	-820
0.141253	0.0127978	-820
0.273312	0.0323036	-820
0.080017	0.133633	-820
0.246832	0.231428	-820
0.25898	-0.442641	-780
0.270649	-0.431836	-780
0.169954	-0.245948	-780
0.176346	-0.224086	-780
0.238574	-0.171041	-780
0.391593	-0.126227	-780
0.207449	0.086081	-780
0.212258	0.134961	-780
0.249922	0.16413	-780
0.265264	-0.434065	-740
0.205777	-0.391507	-740
0.331664	-0.305728	-740
0.371472	-0.302358	-740
0.070819	-0.0303391	-740
0.141669	-0.00985232	-740
0.106947	0.0510709	-740
0.0985667	0.155465	-740
0.178631	-0.291407	-700
0.213223	-0.271732	-700
0.326676	-0.261175	-700
0.231624	-0.237723	-700
0.0726134	-0.0193956	-700
0.088397	0.0459505	-700
0.0879252	0.0701847	-700
0.18304	0.102181	-700
0.292316	-0.485123	-660
0.237462	-0.45694	-660
0.227706	-0.386226	-660
0.314086	-0.370672	-660
0.247367	-0.340863	-660
0.250711	-0.309347	-660
0.392604	-0.291769	-660
0.284021	-0.291284	-660
0.177813	-0.0962731	-660
0.292438	-0.0593459	-660
0.14934	-0.0347753	-660
0.0392764	0.00190994	-660
0.0509195	0.00349264	-660
0.0963203	0.0565476	-660
0.255845	0.103963	-660
0.291777	0.154014	-660
0.247607	-0.158201	-580
0.308361	-0.0919996	-580
0.103164	-0.0135817	-580
0.112258	-0.00695739	-580
0.201936	0.0397826	-580
0.21818	0.0483323	-580
0.181692	0.0962707	-580
0.305176	-0.376942	-540
0.265191	-0.361389	-540
0.2694	-0.160189	-540
0.112727	0.0186372	-540
0.0981913	0.0230449	-540
0.230493	0.0524132	-540
0.191161	0.0903769	-540
0.112059	0.154407	-540
0.217316	0.162445	-540
0.261777	-0.397694	-500
0.223458	-0.353999	-500
0.321513	-0.325672	-500
0.199673	-0.29804	-500
0.243097	-0.25529	-500
0.324538	-0.251706	-500
0.234857	-0.0725975	-500
0.130742	-0.0618612	-500
0.175105	-0.0400737	-500
0.18724	-0.0283895	-500
0.172807	-0.00977269	-500
0.159402	0.0261312	-500
0.0459989	0.0300133	-500
0.0561738	0.0453717	-500
0.231467	0.0744283	-500
0.0978062	0.0858426	-500
0.227657	0.112655	-500
0.0767623	0.115753	-500
0.236703	0.17702	-500
0.185392	0.185791	-500
0.224038	-0.481225	-420
0.308995	-0.414345	-420
0.189593	-0.38431	-420
0.217856	-0.303676	-420
0.194106	-0.223191	-420
-0.0974867	-0.188829	-420
0.21182	-0.155376	-420
0.23225	-0.146164	-420
-0.0337256	-0.113765	-420
0.170883	-0.0970351	-420
0.235089	-0.0882455	-420
0.108176	-0.0807535	-420
0.264165	-0.0633954	-420
0.169917	-0.0549571	-420
-0.01014	-0.019232	-420
0.201306	-0.0178594	-420
0.143329	-0.0109108	-420
0.117706	-0.00894351	-420
0.200235	0.0150842	-420
0.235118	0.0191342	-420
0.145758	0.0319416	-420
0.0983765	0.0348012	-420
0.162974	0.161464	-420
0.118741	0.206689	-420
0.262933	-0.369916	-380
0.322816	-0.358492	-380
0.223195	-0.353665	-380
0.225107	-0.3308	-380
0.236536	-0.323959	-380
0.201303	-0.300264	-380
0.221769	-0.287331	-380
0.259516	-0.253191	-380
0.267915	-0.18979	-380
0.102128	-0.0304741	-380
0.0340831	0.0088697	-380
0.215485	0.0177187	-380
0.135777	0.0195341	-380
0.0966743	0.0341312	-380
0.270157	0.0409497	-380
0.147601	0.0496918	-380
0.210669	0.0528418	-380
0.125542	0.0548095	-380
0.221146	0.0760784	-380
0.243281	0.0811916	-380
0.254911	0.0996905	-380
0.118419	0.155065	-380
0.0745035	0.176956	-380
0.253283	0.182194	-380
0.215936	0.199197	-380
0.224532	0.218601	-380
0.255187	-0.378947	-340
0.227638	-0.360821	-340
0.194322	-0.344323	-340
0.214914	-0.315662	-340
0.253998	-0.176598	-340
0.229869	-0.145221	-340
0.220194	-0.118011	-340
0.106792	-0.114161	-340
0.327111	-0.0887598	-340
0.223373	-0.0837169	-340
0.186096	-0.0159375	-340
0.0548076	0.00723316	-340
0.0310809	0.0130043	-340
0.325153	0.0168268	-340
0.137734	0.0289364	-340
0.208119	0.0344313	-340
0.11755	0.0374371	-340
0.241812	0.049131	-340
0.160708	0.051933	-340
0.103856	0.0756035	-340
0.192243	0.0796573	-340
0.212185	0.0921991	-340
0.241554	0.0985777	-340
0.0774942	0.136483	-340
0.0857321	0.178734	-340
0.203102	0.186369	-340
0.283524	0.224257	-340
0.124661	0.231192	-340
0.305586	-0.309589	-300
0.278016	-0.309589	-300
0.343881	-0.303802	-300
0.226704	-0.284996	-300
0.173857	-0.280656	-300
0.320904	-0.271976	-300
0.35231	-0.177941	-300
0.226704	-0.144668	-300
0.176151	-0.134541	-300
0.242786	-0.101268	-300
0.245851	-0.0274866	-300
0.267292	-0.0245933	-300
0.230534	0.0188067	-300
0.176151	0.05642	-300
0.238957	0.0622067	-300
0.131734	0.0651	-300
0.104157	0.0868	-300
0.05591	0.09548	-300
0.0880747	0.0969267	-300
0.12101	0.118627	-300
0.137092	0.137433	-300
0.291804	0.144667	-300
0.333928	0.146113	-300
0.169263	0.149007	-300
0.198363	0.150453	-300
0.165434	0.208321	-300
0.137857	0.232914	-300
0.106457	0.240148	-300
0.101863	0.276314	-300
0.227469	0.328394	-300
0.357787	-0.232929	-260
0.208395	-0.16543	-260
0.0978937	-0.119917	-260
0.203692	-0.112465	-260
0.301498	-0.0667674	-260
0.169469	-0.0629233	-260
0.321278	-0.0544185	-260
0.141277	-0.0109514	-260
0.051849	-0.00247469	-260
0.175362	0.000347081	-260
0.116271	0.0360572	-260
0.187878	0.0505028	-260
0.209615	0.06015	-260
0.145157	0.0641682	-260
0.0602496	0.0851017	-260
0.211625	0.0862754	-260
0.258337	0.0914623	-260
0.274531	0.0968645	-260
0.22773	0.105402	-260
0.10521	0.136915	-260
0.193388	0.173242	-260
0.272342	0.212107	-260
0.374574	-0.44818	-180
0.325413	-0.429384	-180
0.195358	-0.402283	-180
0.210863	-0.383082	-180
0.189066	-0.373914	-180
0.236312	-0.303046	-180
0.370009	-0.277536	-180
0.242375	-0.26874	-180
0.407326	-0.198881	-180
0.215509	-0.192318	-180
0.245784	-0.18548	-180
0.201471	-0.143813	-180
0.167331	-0.117711	-180
0.191558	-0.0674053	-180
0.23758	-0.0628712	-180
0.263498	-0.0395588	-180
0.142163	-0.0316844	-180
0.336646	-0.0140002	-180
0.266421	0.0272297	-180
0.283374	0.0409421	-180
0.00558138	0.0498607	-180
0.0990743	0.0763186	-180
0.287268	0.104068	-180
0.0920635	0.141745	-180
0.206387	0.162693	-180
0.137849	0.181506	-180
0.272235	-0.428056	-140
0.260024	-0.336535	-140
0.301541	-0.326982	-140
0.232525	-0.3223	-140
0.168694	-0.288811	-140
0.231531	-0.220461	-140
0.152793	-0.199214	-140
0.269004	-0.0881339	-140
0.00270207	-0.0502264	-140
0.246471	-0.0184892	-140
0.126391	-0.0178128	-140
0.16862	-0.00878899	-140
0.0487967	0.00102722	-140
0.0919785	0.0264527	-140
0.0812591	0.0422038	-140
0.201882	0.0520112	-140
0.170129	0.0616356	-140
0.079206	0.0639511	-140
0.249921	0.0691567	-140
0.185029	0.0738813	-140
0.0955339	0.126462	-140
0.125951	0.138052	-140
0.0818406	0.13976	-140
0.137008	0.151602	-140
0.0960075	0.160328	-140
0.0950801	0.187459	-140
0.207446	0.197189	-140
0.125232	0.241242	-140
0.251434	-0.18407	-100
0.239528	-0.168613	-100
0.241763	-0.111003	-100
0.257381	-0.0196711	-100
0.156216	0.0224811	-100
0.264081	0.0379378	-100
-0.00595118	0.046369	-100
0.177786	0.0590145	-100
0.0848041	0.0730656	-100
0.200845	0.0814967	-100
0.305733	0.0927378	-100
0.0624859	0.0955478	-100
0.233581	0.125054	-100
0.0795953	0.144727	-100
0.158445	0.155968	-100
0.158445	0.210767	-100
0.231305	-0.425186	-60
0.204757	-0.324262	-60
0.291841	-0.120993	-60
0.231759	-0.0425963	-60
0.216941	-0.039831	-60
0.137761	-0.0275208	-60
0.0259054	0.00580925	-60
0.313178	0.0546646	-60
0.126606	0.0596584	-60
0.0864613	0.0745007	-60
0.0998551	0.0968937	-60
0.12707	0.120153	-60
0.333186	-0.475643	-20
0.226712	-0.421154	-20
0.21305	-0.416598	-20
0.220691	-0.259512	-20
0.387405	-0.157422	-20
0.251906	-0.1562	-20
0.289418	-0.140806	-20
0.193822	-0.0471164	-20
0.144199	-0.0377059	-20
0.139343	0.013231	-20
0.126415	0.0173808	-20
0.0468891	0.0192421	-20
0.0681044	0.037637	-20
0.230368	0.13164	-20
0.0278422	-0.258816	20
0.360174	-0.188623	20
0.220461	-0.181109	20
0.195873	-0.00976772	20
0.187049	0.0311546	20
0.283086	0.0656479	20
0.081004	0.0713065	20
0.220392	0.103058	20
0.177254	0.107186	20
0.23948	0.139186	20
0.135774	0.147987	20
0.0880199	0.153146	20
0.246586	-0.403591	60
0.195413	-0.368261	60
0.36554	-0.356571	60
0.176948	-0.329804	60
0.298469	-0.200738	60
0.259981	-0.176077	60
0.258321	-0.147722	60
0.191306	-0.134784	60
0.244449	-0.0390756	60
0.125899	0.0261266	60
0.0937541	0.0788897	60
0.097313	0.157299	60
0.233158	-0.282732	100
0.286379	-0.227283	100
0.20587	-0.142583	100
0.273286	-0.0465932	100
0.210616	-0.0123767	100
0.173227	0.00954624	100
0.194908	0.0520352	100
0.23848	-0.460803	140
0.200702	-0.404598	140
0.224347	-0.214205	140
0.407059	-0.0513864	140
0.186751	-0.0287862	140
0.0588006	0.0152977	140
0.189522	0.0644647	140
0.176987	0.0711402	140
0.120488	0.119273	140
0.0845243	0.16098	140
0.263352	-0.410709	180
0.279594	-0.369423	180
0.312759	-0.348788	180
0.285078	-0.34218	180
0.391535	-0.292835	180
0.402667	-0.259458	180
0.398859	-0.230478	180
0.396933	-0.199454	180
0.226386	-0.157528	180
0.297064	-0.0914359	180
0.156843	-0.0154098	180
0.262723	0.0132009	180
0.102234	0.0364774	180
0.290035	0.0818847	180
0.232443	0.0962397	180
0.213331	0.140536	180
0.132185	0.145874	180
0.33187	-0.385226	220
0.226763	-0.361899	220
0.2988	-0.343384	220
0.447952	-0.227248	220
0.425331	-0.215712	220
0.446723	-0.196647	220
0.0423348	0.00339108	220
0.185522	0.16812	220
0.227088	0.171608	220
0.126318	0.187142	220
0.339841	-0.31083	260
0.211868	-0.299401	260
0.384687	-0.255536	260
0.255745	-0.166023	260
0.128827	-0.0506555	260
0.248604	-0.0132366	260
0.156603	0.0579	260
0.288551	0.0579241	260
0.222331	0.132651	260
0.248624	0.15688	260
0.131691	-0.0613875	300
0.220693	-0.0222628	300
0.262257	-0.00382623	300
0.186506	0.0463441	300
0.273253	-0.129772	340
0.229107	0.0331159	340
0.259031	-0.478649	420
0.201064	-0.444208	420
0.342737	-0.301382	420
0.28131	-0.146729	420
0.206548	-0.113231	420
0.156163	-0.0518289	420
0.248153	-0.0408537	420
0.204738	-0.000578297	420
0.269916	-0.453862	460
0.25801	-0.384161	460
0.265518	-0.276943	460
0.242711	-0.242882	460
0.186097	-0.164163	460
0.25658	-0.149248	460
0.246401	-0.0237817	460
0.154158	0.0731399	460
0.193779	0.135318	460
0.335053	-0.403648	500
0.345203	-0.252735	500
0.19857	-0.0145013	500
0.198025	0.029761	500
0.164271	0.0850492	500
0.298102	-0.235504	540
0.285942	-0.10547	540
0.25095	0.000625322	540
0.296942	-0.265814	580
0.267108	-0.237695	580
0.183715	-0.133522	580
0.290189	-0.107503	580
0.165211	0.0249954	580
0.00581845	0.080702	580
0.107813	0.207808	580
0.29326	-0.291474	620
0.113243	0.171343	620
0.250219	-0.0587195	660
0.182144	0.00141393	660
0.0817915	0.0531566	660
0.127344	0.17797	660
0.273826	-0.195254	700
0.294452	-0.224826	740
0.230157	-0.181671	740
0.32091	-0.159975	740
0.118832	0.250386	780
0.0488598	0.000102785	820
0.243822	0.0768097	820
0.131759	0.278177	820
0.152256	0.091275	860
0.00834792	0.121025	900
0.147712	0.125666	900
0.236286	-0.0916263	940
0.310562	-0.0727654	940
0.264039	0.0623734	940
0.243462	-0.013497	980
0.196637	0.00605571	980
0.175578	-0.0202777	1020
0.134249	0.0843693	1020
0.160706	-0.0413797	1140
0.0297863	0.0337896	1140
0.132788	0.0792721	1260
0.125365	0.143563	1260
0.254257	-0.109897	1380
0.248549	-0.0672599	1420
0.0723925	0.256215	1460
0.229676	-0.0500355	1540
0.152761	0.0357774	1580
0.161284	-0.073423	1620
0.22818	-0.170705	1660
0.168242	0.0319246	1700
-0.124507	-0.216322	-1420
-0.0498627	-0.128684	-1380
-0.0871013	-0.156769	-1300
-0.0862137	-0.159224	-1260
-0.0973501	0.00116146	-1260
-0.120167	-0.164084	-1220
-0.134858	-0.0706088	-1220
-0.117909	-0.128078	-1180
-0.110056	-0.110027	-1180
-0.0892907	-0.0813911	-1060
-0.0604452	0.00597295	-1060
-0.174882	-0.157664	-1020
-0.123572	-0.133606	-900
-0.105423	-0.186009	-820
-0.0616944	-0.149279	-820
-0.0625371	-0.126239	-780
-0.0895862	-0.138543	-740
-0.087716	-0.184252	-700
-0.0482903	-0.114585	-700
-0.00933411	0.0198856	-660
-0.0997267	-0.227416	-540
-0.0874598	-0.203049	-540
-0.046644	-0.0960298	-540
-0.00593929	0.055214	-540
-0.0975204	-0.238925	-380
-0.0598532	-0.215014	-380
-0.084775	-0.132882	-380
-0.0125031	-0.0197029	-380
-0.095676	0.0798101	-380
-0.0974821	-0.126584	-340
-0.0732589	-0.111678	-340
-0.0868553	-0.186573	-300
-0.00659103	-0.107308	-300
-0.0715699	-0.132942	-260
-0.0982397	-0.0910036	-260
-0.104361	0.108508	-180
-0.122171	-0.115977	-140
-0.140019	0.00773261	-140
-0.180481	0.158077	-100
-0.130539	-0.140874	-60
-0.0355998	0.0804973	-60
-0.162054	-0.205687	-20
-0.00792962	-0.0664661	-20
-0.0117889	-0.0296511	-20
-0.121781	-0.134619	20
-0.00883595	-0.0522771	20
-0.00303426	-0.0404273	20
-0.0106318	-0.0122054	20
-0.00462045	-0.0656128	60
-0.0993285	-0.205326	100
-0.105493	-0.205445	140
-0.0614786	-0.161223	140
-0.0611019	-0.137366	140
-0.00859967	-0.0736073	140
-0.0758264	-0.246722	180
-0.106333	-0.243178	180
-0.120681	-0.0704099	220
-0.107254	-0.0853944	300
-0.0710815	-0.176062	340
-0.0814322	-0.210182	540
-0.00174948	-0.0539694	540
-0.0850461	-0.172356	580
-0.271795	0.110594	580
-0.211867	-0.228343	620
-0.132722	-0.199422	620
-0.0996921	-0.176532	620
-0.140637	-0.0824958	660
-0.142673	-0.102278	700
-0.109925	-0.174362	860
-0.110455	-0.1208	1020
-0.215959	-0.203112	1140
-0.15165	-0.21481	1380
-0.141626	-0.217302	1420

## Sheet: Sheet2
0.346356	-0.229322	-500
0.329159	-0.140052	-300
0.283319	-0.206749	-220
0.285	-0.270789	-220
0.288958	-0.494398	-220
0.307297	-0.126846	-180
0.281799	-0.153002	-140
0.305104	-0.167533	-140
0.311778	-0.199233	-140
0.301757	-0.219894	-100
0.288739	-0.109948	-100
0.287204	-0.0448467	-100
0.299463	0.0810134	-100
0.325498	-0.0462933	-100
0.289504	-0.0708877	-100
0.297928	-0.137434	-100
0.293334	-0.173601	-100
0.31631	-0.0795677	-100
0.309933	-0.135658	-60
0.297124	-0.140069	-60
0.293944	-0.211055	-60
0.332954	-0.251338	-60
0.265731	-0.23046	-60
0.279071	-0.384336	-60
0.345157	-0.378707	-60
0.308982	-0.243631	20
0.330771	-0.280247	20
0.26973	-0.31039	20
0.293951	-0.319562	20
0.282795	-0.382685	20
0.260733	-0.234409	60
0.297222	-0.256887	60
0.313745	-0.264514	60
0.329539	-0.0266966	100
0.310945	-0.0238867	100
0.342928	-0.148942	100
0.336233	-0.207957	100
0.343675	-0.234653	100
0.317141	-0.322014	180
0.339121	-0.15527	260
0.343323	-0.220647	300
