# Supplementary material for: Spinal premotor interneurons controlling antagonistic muscles are spatially intermingled
Source: eLife. 2022 Dec 13;11:e81976. doi: 10.7554/eLife.81976 (PMC9844990; doi:10.7554/eLife.81976)
Supplement: Figure 12—figure supplement 11—source data 3. [file elife-81976-fig12-figsupp11-data3.xlsx]

## Sheet: Sheet1
0.0492992	0.181767	1200
0.0612913	0.272465	1200
0.101434	0.108273	1200
0.144644	0.123999	1200
0.136367	0.25577	1200
0.17321	0.248428	1200
0.198524	0.263593	1200
0.205451	0.342389	1200
0.228521	0.179073	1200
0.271012	0.106278	1200
0.274684	0.134953	1200
0.295266	0.144703	1200
0.284167	0.101428	1200
0.290538	0.0801638	1200
0.3117	0.0717028	1200
0.317475	0.186904	1200
0.143935	0.00590537	1200
0.133814	-0.0474716	1200
0.171714	-0.0485022	1200
0.186497	-0.0356973	1200
0.215912	-0.0724515	1200
0.225069	-0.0976719	1200
0.234854	-0.0212287	1200
0.268595	-0.0606772	1200
0.237412	-0.148327	1200
0.234078	-0.214845	1200
0.23115	-0.288049	1200
0.237123	-0.332217	1200
0.271267	-0.319209	1200
0.284005	-0.287817	1200
0.281727	-0.333247	1200
0.318324	-0.345477	1200
0.133816	-0.44824	1200
0.0619688	0.255109	1160
0.0725759	0.117106	1160
0.111496	0.0485921	1160
0.175528	0.268498	1160
0.222523	0.279125	1160
0.242998	0.290916	1160
0.205737	0.443358	1160
0.235142	0.168761	1160
0.320999	0.173681	1160
0.188257	0.0324844	1160
0.206124	-0.0923201	1160
0.254561	-0.194442	1160
0.260405	-0.243746	1160
0.272119	-0.325797	1160
0.309144	-0.339316	1160
0.0572056	0.226878	1120
0.153961	0.224295	1120
0.187667	0.379653	1120
0.197154	0.396771	1120
0.214929	0.319877	1120
0.20407	0.304615	1120
0.131353	0.139854	1120
0.138544	0.0874364	1120
0.210154	0.0423221	1120
0.209186	0.0870977	1120
0.235924	0.132474	1120
0.20209	0.192026	1120
0.316345	-0.0449674	1120
0.370302	-0.010004	1120
0.382583	-0.0459797	1120
0.192739	-0.0734307	1120
0.249439	-0.260272	1120
0.281628	-0.3911	1120
0.0359437	0.0514538	1080
0.105152	0.317295	1080
0.146728	0.226752	1080
0.178993	0.239081	1080
0.200812	0.219664	1080
0.22519	0.193626	1080
0.244978	0.105649	1080
0.240681	0.281119	1080
0.160583	0.0786137	1080
0.205961	-0.288413	1080
0.306274	-0.357807	1080
0.389962	-0.136061	1080
0.062168	0.0194997	1040
0.0685549	0.111397	1040
0.0612455	0.270654	1040
0.124376	0.110707	1040
0.165386	0.117259	1040
0.159826	0.00566308	1040
0.213866	0.204118	1040
0.183275	0.327943	1040
0.180803	0.3642	1040
0.199714	0.326967	1040
0.252563	0.111587	1040
0.314326	0.188211	1040
0.372859	0.112108	1040
0.28166	-0.060895	1040
0.2468	-0.123837	1040
0.260854	-0.320028	1040
0.296469	-0.372935	1040
0.333543	-0.28427	1040
0.0511352	0.197542	1000
0.0607528	0.162583	1000
0.0714036	0.0772144	1000
0.0620709	-0.236449	1000
0.117803	-0.0039746	1000
0.140036	-0.0142552	1000
0.172073	0.0150591	1000
0.180484	0.0836236	1000
0.188812	0.122089	1000
0.206573	0.164367	1000
0.180783	0.231314	1000
0.167294	0.274234	1000
0.239407	-0.00300076	1000
0.245874	-0.0157864	1000
0.212199	-0.0777604	1000
0.211402	-0.235382	1000
0.270999	-0.251862	1000
0.347806	-0.322056	1000
0.402773	-0.189839	1000
0.364122	-0.0958894	1000
0.304688	-0.04788	1000
0.336002	-0.0471036	1000
0.384775	0.074898	1000
0.0447065	0.0819694	960
0.0662158	0.152353	960
0.0815393	0.187289	960
0.118831	-0.00663418	960
0.143123	-0.0265481	960
0.146637	-0.0395145	960
0.189219	0.119029	960
0.188036	0.18726	960
0.188036	-0.0819696	960
0.244173	-0.138331	960
0.253866	-0.14167	960
0.270248	-0.125978	960
0.325113	-0.0773763	960
0.407244	-0.148561	960
0.229034	-0.182825	960
0.264943	-0.260871	960
0.307969	-0.337661	960
0.0864744	0.0980141	920
0.0819463	0.224063	920
0.16519	0.317842	920
0.185945	0.270166	920
0.236525	0.156566	920
0.253864	0.0865056	920
0.288398	0.0815576	920
0.212355	-0.0195215	920
0.228657	-0.213982	920
0.208842	-0.252344	920
0.273923	-0.331219	920
0.406779	-0.12861	920
0.0365533	0.0037231	880
0.0791083	-0.042004	880
0.0955647	0.0498909	880
0.101968	0.0802081	880
0.100585	0.25408	880
0.1548	0.234151	880
0.196593	0.142614	880
0.23169	0.221349	880
0.242712	0.202661	880
0.254605	0.298837	880
0.268397	0.0909053	880
0.256476	0.0773899	880
0.213305	0.0637265	880
0.191591	-0.0236634	880
0.202225	-0.084191	880
0.198835	-0.127734	880
0.295646	0.0409326	880
0.300542	-0.0880867	880
0.316541	-0.0840788	880
0.349139	-0.28084	880
0.108283	-0.358162	880
0.0349	-0.0318749	840
0.0467294	0.163671	840
0.114824	0.0890854	840
0.134038	0.0619095	840
0.123921	-0.016962	840
0.135971	0.309556	840
0.157686	0.301791	840
0.184515	0.213111	840
0.199754	0.203509	840
0.198161	0.148554	840
0.207031	0.047612	840
0.250686	0.0269655	840
0.325379	0.182259	840
0.273647	-0.15631	840
0.262277	-0.157954	840
0.264212	-0.235385	840
0.279899	-0.224961	840
0.270232	-0.359413	840
0.306617	-0.390473	840
0.366646	-0.340418	840
0.316625	-0.131381	840
0.0684036	0.151887	800
0.108565	0.290448	800
0.113419	0.467928	800
0.122706	0.150713	800
0.196339	0.25359	800
0.221172	0.267926	800
0.259483	0.20507	800
0.24213	0.0638116	800
0.268437	-0.000900884	800
0.29307	0.0731199	800
0.319848	0.085527	800
0.225245	-0.0802773	800
0.24097	-0.15543	800
0.246667	-0.20727	800
0.240563	-0.240702	800
0.222855	-0.333041	800
0.248952	-0.320446	800
0.325894	-0.379834	800
0.345068	-0.366541	800
0.382613	-0.305818	800
0.0543778	0.108482	720
0.0652551	0.0755491	720
0.0903629	0.0735729	720
0.115008	0.0936335	720
0.12264	0.0736273	720
0.138823	0.0553545	720
0.14464	0.00162618	720
0.110161	-0.0186736	720
0.17897	0.0292572	720
0.200484	0.0731985	720
0.233744	0.0864484	720
0.256605	0.120326	720
0.151862	0.164601	720
0.164842	0.178755	720
0.157566	0.203555	720
0.290581	0.246812	720
0.259667	-0.0742303	720
0.258002	-0.153109	720
0.27107	-0.175556	720
0.242741	-0.254533	720
0.262542	-0.271182	720
0.291055	-0.293445	720
0.282075	-0.329225	720
0.380165	-0.378097	720
0.165572	-0.188419	720
0.0347759	-0.15696	680
0.094386	0.0631628	680
0.124524	0.122016	680
0.12227	0.0607759	680
0.0611051	0.229823	680
0.150247	0.118932	680
0.166161	0.0566245	680
0.212195	0.0784163	680
0.242379	0.120855	680
0.251798	0.149885	680
0.271675	0.288475	680
0.319853	0.0812375	680
0.303732	0.0135998	680
0.281827	0.0118692	680
0.210032	-0.0497462	680
0.197829	-0.155044	680
0.224403	-0.232817	680
0.264442	-0.14757	680
0.280507	-0.0975943	680
0.289831	-0.163186	680
0.337434	-0.0458916	680
0.301386	-0.303848	680
0.2824	-0.346741	680
0.307252	-0.343289	680
0.259247	-0.30396	680
0.432479	-0.280781	680
0.0828342	0.108942	640
0.0790925	0.196424	640
0.108224	0.106022	640
0.0960875	0.057076	640
0.161965	0.0194152	640
0.175437	-0.0376746	640
0.123926	-0.107616	640
0.20246	0.0374709	640
0.21648	0.0768099	640
0.223237	0.0824032	640
0.251082	0.121209	640
0.234847	0.148264	640
0.23383	0.197531	640
0.208514	0.231325	640
0.196644	0.200313	640
0.282607	0.0493782	640
0.255403	-0.00509328	640
0.269441	-0.0108349	640
0.233322	-0.132037	640
0.265268	-0.116421	640
0.294594	-0.21975	640
0.251353	-0.31292	640
0.266486	-0.329318	640
0.259118	-0.356604	640
0.387783	-0.254487	640
0.40474	-0.311384	640
0.0661301	0.155286	600
0.0882659	0.170961	600
0.0619297	-0.0199258	600
0.181559	0.0908935	600
0.202507	0.129583	600
0.207923	0.180288	600
0.174554	0.210226	600
0.170202	0.267438	600
0.228152	0.00412861	600
0.280831	-0.0628231	600
0.322385	0.0707384	600
0.21663	-0.158514	600
0.224891	-0.279487	600
0.249009	-0.356465	600
0.201954	-0.399135	600
0.126526	-0.357042	600
0.0616442	0.146189	560
0.0810087	0.0868474	560
0.0959201	0.110502	560
0.113645	-0.0393653	560
0.129226	0.00148789	560
0.147794	0.0454556	560
0.162094	0.043849	560
0.194225	0.164057	560
0.178259	0.266546	560
0.157667	0.275395	560
0.210458	-0.0134518	560
0.194053	-0.0473632	560
0.177545	-0.0825801	560
0.235447	-0.0972196	560
0.243206	-0.190558	560
0.264331	-0.314662	560
0.289679	-0.367763	560
0.321115	-0.413303	560
0.375349	-0.343874	560
0.395754	-0.154556	560
0.352541	-0.0318741	560
0.0459344	-0.0169608	520
0.0601099	-0.00752691	520
0.106785	-0.0233015	520
0.120375	-0.0413644	520
0.147553	0.0262944	520
0.174395	0.205663	520
0.198878	0.200212	520
0.214138	0.0399947	520
0.23403	-0.00540422	520
0.263413	0.124928	520
0.160952	-0.129674	520
0.162734	-0.165453	520
0.233565	-0.2234	520
0.248025	-0.148345	520
0.263154	-0.296709	520
0.313283	-0.252644	520
0.30796	-0.15979	520
0.314911	-0.365897	520
0.078063	0.184082	480
0.109558	0.158924	480
0.161928	0.292228	480
0.218045	0.27582	480
0.214747	0.230558	480
0.227652	0.215537	480
0.256259	0.251419	480
0.25292	0.37026	480
0.16716	0.0805624	480
0.203963	0.0642367	480
0.256137	0.066835	480
0.292542	0.136502	480
0.301555	0.0956151	480
0.318468	0.0166968	480
0.295179	-0.0193276	480
0.280342	-0.158919	480
0.234056	-0.236184	480
0.201357	-0.145316	480
0.202812	-0.116223	480
0.124414	-0.0579057	480
0.177839	0.053323	480
0.0409035	0.193633	400
0.0930869	0.209149	400
0.15565	0.204333	400
0.163797	0.230051	400
0.184435	0.249329	400
0.190038	0.21563	400
0.211619	0.127916	400
0.221426	0.146777	400
0.177836	0.0904516	400
0.186779	0.0560927	400
0.142049	0.053391	400
0.119121	0.054113	400
0.131595	-0.0148278	400
0.169259	-0.0302382	400
0.209109	0.056793	400
0.237735	0.0614427	400
0.243084	0.0356052	400
0.266827	0.0373357	400
0.281542	0.0968848	400
0.287114	0.0254182	400
0.234595	-0.0212819	400
0.230049	-0.105025	400
0.283837	-0.17189	400
0.309808	-0.352959	400
0.26055	-0.376888	400
0.242258	-0.365387	400
0.0514991	0.0937304	360
0.105044	0.172954	360
0.133024	0.182149	360
0.139096	0.0975169	360
0.170474	0.157524	360
0.193796	0.026135	360
0.156076	-0.0867474	360
0.184315	-0.15215	360
0.204434	-0.0785882	360
0.247642	-0.034805	360
0.288465	0.0569603	360
0.23087	-0.151393	360
0.246702	-0.145202	360
0.258815	-0.169197	360
0.20989	-0.214525	360
0.227554	-0.346198	360
0.299719	-0.380818	360
0.342601	-0.356274	360
0.153798	-0.315151	360
0.0989269	0.137585	280
0.100026	0.0833388	280
0.0784789	0.000322172	280
0.124685	0.0386756	280
0.136156	0.0698717	280
0.137969	0.115333	280
0.144536	-0.0588734	280
0.115549	-0.0948255	280
0.119898	-0.103009	280
0.166618	0.0701696	280
0.195723	0.0860623	280
0.207195	0.059736	280
0.228402	0.0616245	280
0.2027	-0.0483109	280
0.256931	0.0940302	280
0.218047	0.143717	280
0.206063	0.176531	280
0.187607	0.195933	280
0.218625	0.268516	280
0.251169	0.295386	280
0.272467	0.0258932	280
0.310668	0.0127608	280
0.408054	-0.0865478	280
0.314399	-0.225226	280
0.274378	-0.200029	280
0.273724	-0.168487	280
0.282374	-0.232331	280
0.345971	-0.279193	280
0.336912	-0.370214	280
0.24826	-0.433573	280
0.192417	-0.290102	280
0.294368	-0.0663132	280
0.0747836	0.183777	240
0.0724569	-0.0114938	240
0.0705038	-0.0540114	240
0.0939102	0.0370639	240
0.128466	0.0621735	240
0.155387	0.0676295	240
0.190699	0.0937362	240
0.188077	0.112286	240
0.163673	0.182639	240
0.211261	0.183113	240
0.138726	-0.0501549	240
0.199197	-0.180547	240
0.221173	-0.0903317	240
0.269328	-0.0911865	240
0.294818	-0.0865904	240
0.254383	0.0306279	240
0.28722	-0.00116601	240
0.29095	0.0815151	240
0.290628	0.0338236	240
0.421361	0.0118704	240
0.339103	-0.36354	240
0.310388	-0.400786	240
0.243558	-0.334536	240
0.00833525	0.0232717	200
0.0557138	0.0390397	200
0.0713109	-0.015912	200
0.0926854	0.00205909	200
0.101434	0.031229	200
0.123556	0.0406517	200
0.117119	-0.0321239	200
0.0745347	0.0779301	200
0.0816293	0.140969	200
0.137672	0.165576	200
0.14931	0.0923543	200
0.17217	0.121975	200
0.175554	0.0936841	200
0.18612	0.0817497	200
0.175138	0.0494914	200
0.198332	0.0455117	200
0.208242	0.0816082	200
0.201062	0.151432	200
0.189007	0.180449	200
0.222436	0.169403	200
0.271048	0.154969	200
0.296884	0.121669	200
0.266098	0.0268041	200
0.193795	-0.0576144	200
0.236134	-0.16161	200
0.224659	-0.258394	200
0.217564	-0.311881	200
0.215331	-0.391572	200
0.258497	-0.388041	200
0.256433	-0.417507	200
0.143608	-0.304943	200
0.118271	-0.216709	200
0.00831649	0.0195824	160
0.0571586	0.00651748	160
0.0530809	-0.0574727	160
0.078998	0.0616438	160
0.0965607	0.0278426	160
0.0975225	0.00725057	160
0.0986251	-0.012191	160
0.11994	0.0788394	160
0.0662874	0.160329	160
0.0914107	0.191637	160
0.142255	0.161167	160
0.172107	0.181223	160
0.203764	0.199431	160
0.197285	0.149411	160
0.190142	0.0936747	160
0.206167	0.0640151	160
0.18141	0.0242493	160
0.15551	0.0325171	160
0.149052	-0.0520338	160
0.168199	-0.0721311	160
0.150903	-0.117	160
0.190728	-0.00535243	160
0.206091	-0.0811977	160
0.241455	-0.111973	160
0.255191	-0.13246	160
0.226573	0.112517	160
0.255292	0.0996524	160
0.28257	0.161129	160
0.304789	0.132776	160
0.297017	0.0427461	160
0.266542	0.0288763	160
0.148272	-0.255346	160
0.136469	-0.356985	160
0.28756	-0.2931	160
0.291506	-0.270733	160
0.317207	-0.338461	160
0.364079	-0.322229	160
0.362179	-0.228681	160
0.441045	-0.20866	160
0.460351	-0.181186	160
0.00576142	-0.1287	120
0.0553242	0.0850025	120
0.0744982	0.06581	120
0.107231	0.0324382	120
0.130051	0.00871934	120
0.140644	0.0478799	120
0.143342	0.0680621	120
0.145012	0.0150129	120
0.153785	0.00806614	120
0.155127	-0.0497983	120
0.151698	-0.0710423	120
0.137468	-0.0762741	120
0.114309	-0.0671782	120
0.178697	-0.0528656	120
0.11286	0.182944	120
0.183843	0.100205	120
0.216304	0.256677	120
0.235982	0.157782	120
0.255056	0.117812	120
0.274377	0.0814562	120
0.260347	0.0112695	120
0.30097	-0.0129332	120
0.31579	0.0301166	120
0.238746	-0.0730531	120
0.234688	-0.181079	120
0.241338	-0.199778	120
0.284391	-0.236799	120
0.267387	-0.263428	120
0.215064	-0.343009	120
0.195578	-0.318851	120
0.184659	-0.35303	120
0.15761	-0.333226	120
0.204728	-0.368747	120
0.182356	-0.163931	120
0.2834	-0.377387	120
0.3574	-0.212269	120
0.319575	-0.253616	120
0.0627452	0.0771896	80
0.0775196	0.0920094	80
0.0769795	0.182385	80
0.118811	0.191905	80
0.121524	0.132957	80
0.142086	0.115265	80
0.168957	0.100521	80
0.149875	0.00857761	80
0.161656	0.005239	80
0.173782	-0.00176186	80
0.150256	-0.0687034	80
0.136053	-0.0919859	80
0.165141	-0.148911	80
0.171943	-0.192391	80
0.183803	-0.0615967	80
0.191141	-0.0399208	80
0.199478	0.133425	80
0.158268	0.256712	80
0.221127	0.238899	80
0.232345	0.118178	80
0.262516	0.125058	80
0.224464	0.157216	80
0.283858	-0.0840055	80
0.246143	-0.0555076	80
0.2403	-0.0977851	80
0.247258	-0.124696	80
0.270643	-0.170495	80
0.300858	-0.052019	80
0.188008	-0.296675	80
0.176893	-0.360005	80
0.344928	-0.277033	80
0.311558	-0.14885	80
0.0269352	-0.00699394	40
0.0433331	-0.011482	40
0.0612006	0.0704275	40
0.0613166	0.146164	40
0.0668977	0.168775	40
0.0824025	0.194664	40
0.0946445	0.0612177	40
0.0925305	0.00176295	40
0.0853662	-0.0225309	40
0.131941	0.0930214	40
0.153924	0.0843848	40
0.115845	0.131963	40
0.169382	0.206126	40
0.18607	0.129099	40
0.182573	0.106899	40
0.177692	0.0684513	40
0.159795	0.0077119	40
0.16885	-0.00652354	40
0.157276	-0.0281956	40
0.140357	-0.0491511	40
0.130613	0.0344218	40
0.201129	-0.014234	40
0.213053	-0.000480615	40
0.23707	0.00689717	40
0.243763	0.0436011	40
0.221652	0.10466	40
0.224423	0.163891	40
0.24418	0.180525	40
0.258165	0.162366	40
0.275308	0.0461773	40
0.323336	0.034201	40
0.361881	0.0544409	40
0.432691	-0.0132506	40
0.432932	-0.0434281	40
0.33886	-0.0680603	40
0.291104	-0.080686	40
0.27151	-0.063956	40
0.254969	-0.114012	40
0.176016	-0.190623	40
0.233795	-0.286175	40
0.227937	-0.33765	40
0.236662	-0.338412	40
0.243705	-0.363106	40
0.193081	-0.323495	40
0.29615	-0.324227	40
0.344534	-0.290644	40
0.392204	-0.348191	40
0.0211022	0.0404776	0
0.0715835	0.195279	0
0.0962634	0.145333	0
0.0987561	0.123406	0
0.114185	0.135088	0
0.117083	0.0249037	0
0.126872	-0.0380631	0
0.141932	-0.0497685	0
0.173969	-0.0150176	0
0.157308	0.053592	0
0.185322	0.161278	0
0.186675	0.200814	0
0.208664	0.157577	0
0.228567	0.19961	0
0.240452	0.255874	0
0.276921	0.313929	0
0.222224	0.118131	0
0.21509	0.134445	0
0.216203	0.0530049	0
0.210348	-0.00393866	0
0.231344	0.00249164	0
0.249954	0.0648967	0
0.26398	0.0958117	0
0.325682	0.155469	0
0.273624	0.0446532	0
0.269875	0.00820207	0
0.308743	0.0302623	0
0.393797	-0.0454023	0
0.410274	-0.0763449	0
0.295756	-0.0432873	0
0.28159	-0.0624083	0
0.260085	-0.0804321	0
0.245592	-0.0830105	0
0.229665	-0.0863059	0
0.245784	-0.120668	0
0.259694	-0.156704	0
0.28552	-0.14941	0
0.310803	-0.107868	0
0.213817	-0.161316	0
0.186511	-0.143478	0
0.181055	-0.189967	0
0.0606031	-0.142138	0
0.22052	-0.260938	0
0.222612	-0.326215	0
0.18814	-0.364916	0
0.29461	-0.252116	0
0.282694	-0.229632	0
0.277658	-0.278608	0
0.348113	-0.0547762	0
0.331505	-0.229446	0
0.333343	-0.316986	0
0.311047	-0.355922	0
0.0327177	-0.0890046	-80
0.0618554	-0.0419845	-80
0.0657945	-0.00353971	-80
0.0601999	0.037462	-80
0.0895988	0.135378	-80
0.0822416	0.188306	-80
0.150308	0.208385	-80
0.157742	0.109557	-80
0.146701	0.0526096	-80
0.115847	-0.0194355	-80
0.128019	-0.0494504	-80
0.100129	-0.163067	-80
0.157023	-0.0418903	-80
0.169542	0.00829179	-80
0.19374	0.0400605	-80
0.209648	0.0829679	-80
0.178065	0.1602	-80
0.196478	0.211353	-80
0.2159	0.183231	-80
0.227734	0.148221	-80
0.228012	0.246264	-80
0.286461	0.314775	-80
0.283904	0.221168	-80
0.273194	0.197257	-80
0.304084	0.185202	-80
0.30488	0.140381	-80
0.266418	0.089478	-80
0.265141	0.042681	-80
0.27786	0.0112484	-80
0.29816	0.0427857	-80
0.341864	-0.347328	-80
0.372605	-0.342788	-80
0.424517	-0.24705	-80
0.407384	-0.176216	-80
0.277911	-0.251276	-80
0.290151	-0.148769	-80
0.220462	-0.220652	-80
0.207682	-0.124225	-80
0.245354	-0.254047	-80
-0.00036977	0.0502665	-120
0.0359616	0.0375372	-120
0.0391293	0.00764866	-120
0.0340396	-0.00755679	-120
0.0527855	-0.107448	-120
0.07849	7.64898e-05	-120
0.11479	0.0422146	-120
0.106144	0.079149	-120
0.115893	0.0851586	-120
0.136443	0.0934341	-120
0.136583	0.0677279	-120
0.131899	0.233362	-120
0.124258	0.201196	-120
0.168361	0.185576	-120
0.159637	0.027595	-120
0.180841	0.0357253	-120
0.188022	0.00611172	-120
0.164151	-0.0481256	-120
0.174335	-0.109911	-120
0.199461	-0.111991	-120
0.234315	-0.0345167	-120
0.230299	0.0574287	-120
0.248307	0.0580946	-120
0.200965	0.121133	-120
0.227294	0.181833	-120
0.273332	0.026864	-120
0.282833	0.0387581	-120
0.307249	0.0636891	-120
0.276465	-0.0403638	-120
0.333044	-0.113627	-120
0.309979	-0.0921711	-120
0.226127	-0.231142	-120
0.197986	-0.307762	-120
0.0656712	0.226756	-160
0.09098	0.15088	-160
0.101022	0.147161	-160
0.0491125	-0.0510409	-160
0.110886	-0.0872504	-160
0.111532	-0.0534918	-160
0.133356	-0.01341	-160
0.131639	0.0258709	-160
0.165327	0.0273027	-160
0.172517	0.0414428	-160
0.184258	0.0962463	-160
0.1946	0.0528287	-160
0.218715	0.0643373	-160
0.212803	0.0386012	-160
0.196835	0.00889971	-160
0.220015	0.00766777	-160
0.166889	-0.0316871	-160
0.251437	0.195913	-160
0.282412	0.0502795	-160
0.303852	0.0542825	-160
0.245229	-0.0461852	-160
0.250362	-0.0134808	-160
0.242551	-0.0800666	-160
0.232506	-0.155478	-160
0.230552	-0.185318	-160
0.26583	-0.182455	-160
0.18531	-0.187791	-160
0.19132	-0.210457	-160
0.169209	-0.22952	-160
0.018811	0.0987775	-200
0.0345237	0.130393	-200
0.075334	0.195516	-200
0.0552134	0.0969865	-200
0.0765528	0.0515678	-200
0.0610365	-0.000270039	-200
0.116159	0.0123804	-200
0.127987	0.0102549	-200
0.126927	-0.0204276	-200
0.135407	-0.0231359	-200
0.151761	-0.027272	-200
0.139606	-0.0429057	-200
0.116533	-0.0755802	-200
0.135027	0.0529426	-200
0.133853	0.103042	-200
0.162974	0.172635	-200
0.172072	0.0154002	-200
0.195735	0.0705371	-200
0.221702	0.131208	-200
0.20657	0.0389017	-200
0.202821	0.0193883	-200
0.240842	0.235849	-200
0.298446	0.150671	-200
0.267864	0.00769993	-200
0.325284	0.0140023	-200
0.223823	-0.0912943	-200
0.262903	-0.151772	-200
0.223078	-0.175488	-200
0.267007	-0.291475	-200
0.238484	-0.338606	-200
0.291631	-0.373107	-200
0.0250236	-0.031765	-240
0.0517253	0.0730201	-240
0.0632125	-0.00481543	-240
0.0858775	0.0380989	-240
0.0960052	0.0392859	-240
0.112513	0.0538961	-240
0.109757	0.0704771	-240
0.11713	0.0882569	-240
0.121116	0.0702513	-240
0.112736	0.0127744	-240
0.12819	0.00479908	-240
0.130179	-0.0218807	-240
0.149479	-0.0409854	-240
0.171904	-0.0276693	-240
0.188646	0.0165527	-240
0.19553	0.0367101	-240
0.20741	0.0785948	-240
0.212538	0.119676	-240
0.191865	0.147058	-240
0.199285	0.183082	-240
0.162972	0.18083	-240
0.0911094	0.151046	-240
0.0771653	0.170097	-240
0.212582	-0.0560568	-240
0.200462	-0.12754	-240
0.186762	-0.202109	-240
0.262267	-0.0715888	-240
0.273441	-0.0478028	-240
0.246266	-0.0178446	-240
0.237398	0.0856656	-240
0.236943	0.132543	-240
0.302603	0.151146	-240
0.294946	0.0238902	-240
0.405645	0.203698	-240
0.273256	-0.182413	-240
0.390465	-0.190033	-240
0.289028	-0.353619	-240
0.284435	-0.378858	-240
0.349148	-0.407976	-240
0.229675	-0.289176	-240
0.278734	-0.101465	-240
0.0608822	-0.0341161	-280
0.10366	0.00793201	-280
0.120401	0.0945742	-280
0.11532	0.158511	-280
0.141984	0.0520867	-280
0.143285	-0.0502059	-280
0.16002	0.00560075	-280
0.163155	-0.00692438	-280
0.17932	-0.000816383	-280
0.18664	0.0415394	-280
0.20218	0.0584484	-280
0.196634	0.0845326	-280
0.178329	0.0859866	-280
0.227681	0.158691	-280
0.230211	0.187812	-280
0.216377	0.269009	-280
0.234499	0.305543	-280
0.263273	0.180881	-280
0.376534	0.246115	-280
0.296979	0.0919615	-280
0.285375	0.0137268	-280
0.290431	-0.00987102	-280
0.365285	-0.0208217	-280
0.2032	-0.0176907	-280
0.222773	-0.0811093	-280
0.239014	-0.0738315	-280
0.275092	-0.135968	-280
0.216813	-0.204418	-280
0.0233518	0.15881	-280
0.00556233	-0.0688062	-320
0.0869522	0.068554	-320
0.0926318	0.0265703	-320
0.0773616	-0.0231676	-320
0.108641	-0.00595574	-320
0.13119	-0.0271229	-320
0.157516	0.0280346	-320
0.133489	0.0658283	-320
0.138791	0.108378	-320
0.105807	0.241147	-320
0.207258	0.193595	-320
0.260967	0.162806	-320
0.289291	0.135064	-320
0.276304	0.0694996	-320
0.313553	0.0726959	-320
0.225949	0.0130339	-320
0.195008	0.00666546	-320
0.178213	-0.0484264	-320
0.19649	-0.0882076	-320
0.204691	-0.0923485	-320
0.193086	-0.170819	-320
0.188493	-0.208835	-320
0.227278	-0.169751	-320
0.275427	-0.0535032	-320
0.293644	-0.145811	-320
0.265972	-0.20518	-320
0.245321	-0.224087	-320
0.29426	-0.294024	-320
0.281844	-0.334201	-320
0.287333	-0.407861	-320
0.40483	-0.239847	-320
0.410154	0.0593659	-320
0.0250665	-0.170014	-360
0.0634867	-0.102022	-360
0.0881925	0.179768	-360
0.0878643	0.208668	-360
0.117619	0.215001	-360
0.139666	0.226072	-360
0.139653	0.187164	-360
0.133505	0.0837728	-360
0.168301	0.161012	-360
0.185877	0.195212	-360
0.208051	0.210031	-360
0.214402	0.223042	-360
0.201517	0.153113	-360
0.179203	0.0956503	-360
0.167014	0.0269024	-360
0.169902	-0.0424808	-360
0.185013	-0.0230314	-360
0.201209	0.0477404	-360
0.216005	-0.0381822	-360
0.221788	-0.0225772	-360
0.201973	-0.199564	-360
0.241908	-0.164384	-360
0.299134	-0.0648421	-360
0.3083	-0.0848042	-360
0.297018	0.0659272	-360
0.262554	0.171864	-360
0.257225	0.188839	-360
0.283376	-0.257391	-360
0.293463	-0.385389	-360
0.316156	-0.374411	-360
0.331701	-0.361276	-360
0.376284	-0.363075	-360
0.0194117	0.0865807	-440
0.0440641	0.169402	-440
0.0453891	0.0553457	-440
0.0601068	0.0492965	-440
0.0621496	0.0300624	-440
0.0667726	0.0839453	-440
0.0924014	0.114039	-440
0.116559	0.180737	-440
0.0596375	0.269409	-440
0.152961	0.150749	-440
0.162096	0.124797	-440
0.156557	0.0961295	-440
0.143276	0.01808	-440
0.123924	-0.011021	-440
0.112343	-0.0469902	-440
0.176259	-0.124838	-440
0.231046	-0.176747	-440
0.252143	-0.218064	-440
0.220345	-0.266671	-440
0.260615	-0.366336	-440
0.28441	-0.3708	-440
0.309951	-0.360692	-440
0.37208	-0.104373	-440
0.379654	0.0938006	-440
0.303459	0.0883427	-440
0.274563	0.089044	-440
0.254673	0.0525697	-440
0.208145	0.0287455	-440
0.215967	0.183107	-440
0.243444	-0.0634731	-440
0.257492	-0.0693481	-440
0.282008	-0.082739	-440
0.0516308	0.0391276	-480
0.0806404	0.188027	-480
0.0964086	0.033345	-480
0.119325	0.0456597	-480
0.136029	-0.0442728	-480
0.139072	0.0049446	-480
0.146197	0.0574499	-480
0.155282	0.0524615	-480
0.167227	0.0725427	-480
0.168553	0.110536	-480
0.141607	0.134373	-480
0.174448	-0.00471967	-480
0.192795	-0.00962354	-480
0.218128	0.0150917	-480
0.218032	-0.0256087	-480
0.217148	-0.0509333	-480
0.148746	-0.0968062	-480
0.203936	-0.240038	-480
0.264755	-0.127048	-480
0.25704	-0.10188	-480
0.291717	-0.0936322	-480
0.257895	-0.0205785	-480
0.249842	0.0707848	-480
0.227796	0.2161	-480
0.257998	0.228727	-480
0.347495	-0.163172	-480
0.407769	0.00967718	-480
0.122904	0.0664787	-560
0.168064	0.112244	-560
0.176158	0.108464	-560
0.188683	0.137301	-560
0.152862	0.16659	-560
0.143832	-0.0381946	-560
0.155105	-0.0202711	-560
0.141023	-0.0797278	-560
0.171299	-0.0414272	-560
0.176716	-0.0163771	-560
0.1756	0.00234116	-560
0.198393	0.0159145	-560
0.202942	-0.00334882	-560
0.219635	0.053219	-560
0.211667	0.073038	-560
0.161956	0.0329544	-560
0.243182	0.135849	-560
0.253898	0.224261	-560
0.216211	-0.0549025	-560
0.28504	0.0487617	-560
0.296879	0.0641286	-560
0.328898	0.0552269	-560
0.33936	-0.0106975	-560
0.37536	-0.0363188	-560
0.344032	-0.16337	-560
0.293886	-0.252793	-560
0.305217	-0.274391	-560
0.283416	-0.30914	-560
0.248785	-0.324499	-560
0.218385	-0.351676	-560
0.211164	-0.330733	-560
0.196459	-0.334517	-560
0.200139	-0.235076	-560
0.219821	-0.241986	-560
0.235705	-0.255685	-560
0.316932	-0.383741	-560
0.279804	-0.189977	-560
0.281492	-0.170496	-560
0.0298124	-0.0511722	-600
0.06029	-0.149064	-600
0.0823139	0.0738832	-600
0.0524197	0.123666	-600
0.093007	0.023242	-600
0.105629	-0.0179869	-600
0.129085	0.101645	-600
0.140251	0.0706457	-600
0.149713	0.103524	-600
0.13963	0.141314	-600
0.125189	0.163267	-600
0.195845	0.259801	-600
0.184745	0.152578	-600
0.226947	0.242131	-600
0.237924	0.173097	-600
0.205147	0.139011	-600
0.198769	0.123682	-600
0.177649	0.0669156	-600
0.172492	0.025897	-600
0.193713	0.0262339	-600
0.202237	0.0663943	-600
0.21756	0.117566	-600
0.154741	-0.0316978	-600
0.21266	-0.0236409	-600
0.218337	-0.0433996	-600
0.277071	0.129452	-600
0.292985	0.132512	-600
0.356229	0.0800129	-600
0.360624	0.119813	-600
0.393267	0.0354721	-600
0.32705	-0.0438374	-600
0.28291	-0.0849569	-600
0.265031	-0.167918	-600
0.251282	-0.157428	-600
0.239681	-0.168615	-600
0.232339	-0.258444	-600
0.249794	-0.322053	-600
0.336895	-0.341052	-600
0.424786	-0.230498	-600
0.302121	-0.141945	-600
0.0542434	-0.125915	-640
0.0325292	0.052585	-640
0.0893797	0.0224974	-640
0.0950142	0.088345	-640
0.122574	0.074848	-640
0.118705	0.0385306	-640
0.0838241	0.177706	-640
0.0960786	0.16962	-640
0.148107	0.152525	-640
0.134867	0.216233	-640
0.163244	0.0743198	-640
0.156073	0.0328935	-640
0.18279	-0.00793684	-640
0.199742	-0.0302534	-640
0.223367	-0.0611971	-640
0.208297	-0.086022	-640
0.217971	-0.118332	-640
0.263585	0.0376771	-640
0.248488	0.103308	-640
0.230123	0.19018	-640
0.245898	0.202196	-640
0.18883	0.217303	-640
0.286595	0.195385	-640
0.286043	0.0800118	-640
0.328216	0.0287117	-640
0.327606	-0.0288704	-640
0.25686	-0.181035	-640
0.259753	-0.212209	-640
0.272375	-0.210373	-640
0.232047	-0.31675	-640
0.235548	-0.290355	-640
0.257901	-0.378633	-640
0.298023	-0.371426	-640
0.320511	-0.380612	-640
0.0316816	0.119352	-680
0.0373391	0.186972	-680
0.0603495	0.342613	-680
0.0807546	0.139946	-680
0.104446	0.0512779	-680
0.0962008	0.0268284	-680
0.120725	0.00353648	-680
0.15243	0.0294919	-680
0.167759	0.168765	-680
0.174219	0.154265	-680
0.26843	0.125822	-680
0.222778	0.127433	-680
0.218568	0.0939268	-680
0.247616	0.0417997	-680
0.20867	0.0190417	-680
0.16388	-0.100786	-680
0.22029	-0.148966	-680
0.226971	-0.240526	-680
0.186984	-0.264701	-680
0.254554	-0.313639	-680
0.233653	-0.332086	-680
0.230946	-0.370838	-680
0.221668	-0.396693	-680
0.252575	-0.382036	-680
0.290506	-0.373812	-680
0.344197	-0.367322	-680
0.275552	-0.119872	-680
0.268722	-0.0839923	-680
0.283972	-0.0528591	-680
0.269547	-0.0186273	-680
0.276276	0.0241678	-680
0.290511	0.0407676	-680
0.293119	-0.0155053	-680
0.335487	0.0294712	-680
0.0490753	0.173314	-720
0.0699484	0.128943	-720
0.0872936	0.118285	-720
0.0877601	-0.0517833	-720
0.127977	0.116494	-720
0.154342	0.15767	-720
0.204871	0.235283	-720
0.157071	0.318388	-720
0.239382	0.285116	-720
0.211388	0.100342	-720
0.195269	0.0118794	-720
0.195602	-0.0124851	-720
0.18322	-0.0132975	-720
0.209697	-0.0293825	-720
0.261056	0.0463253	-720
0.306041	-0.00668736	-720
0.31927	-0.125725	-720
0.197277	-0.163729	-720
0.253618	-0.276414	-720
0.226269	-0.362468	-720
0.293058	-0.401088	-720
0.341277	-0.388881	-720
0.0318522	-0.000659524	-760
0.0109031	0.145204	-760
0.0789789	0.193888	-760
0.0934434	0.213283	-760
0.121487	0.0340212	-760
0.131813	0.0614481	-760
0.126043	0.00476567	-760
0.158034	0.0744752	-760
0.160873	0.0473992	-760
0.203359	0.174415	-760
0.255033	0.216497	-760
0.238804	0.0620173	-760
0.2686	0.0724161	-760
0.251404	0.0132117	-760
0.197611	0.00859342	-760
0.188567	-0.0138621	-760
0.248021	-0.0634197	-760
0.26523	-0.0587644	-760
0.275003	-0.135057	-760
0.301006	-0.180053	-760
0.405531	-0.0240054	-760
0.27137	-0.283782	-760
0.184231	-0.282098	-760
0.200681	-0.370551	-760
0.237297	-0.356518	-760
0.292282	-0.389154	-760
0.0531924	0.0698746	-800
0.0675815	-0.0700649	-800
0.125541	-0.0915304	-800
0.151514	-0.0374794	-800
0.131725	0.0253407	-800
0.186014	0.142175	-800
0.196188	0.127939	-800
0.220233	0.138806	-800
0.220206	0.182301	-800
0.212131	0.221592	-800
0.244833	0.0516859	-800
0.26521	-0.0420205	-800
0.239243	-0.096087	-800
0.351904	0.118846	-800
0.398671	0.0664331	-800
0.23376	-0.285564	-800
0.208684	-0.341583	-800
0.264767	-0.360947	-800
0.288114	-0.388056	-800
0.0752205	-0.00563412	-880
0.0982229	0.0356211	-880
0.10563	0.0500077	-880
0.125542	0.0143112	-880
0.162993	0.0430109	-880
0.150105	0.0799441	-880
0.203759	0.0657754	-880
0.204392	0.128541	-880
0.224975	0.0048557	-880
0.249474	-0.00569473	-880
0.224108	-0.0412823	-880
0.199292	-0.0621213	-880
0.189457	-0.0525881	-880
0.161943	-0.0709698	-880
0.193718	-0.125077	-880
0.248543	-0.128003	-880
0.268298	-0.0990397	-880
0.280115	-0.127378	-880
0.309174	-0.150862	-880
0.329794	-0.075773	-880
0.334884	-0.0458049	-880
0.307824	0.0251315	-880
0.384589	-0.0223688	-880
0.307193	-0.22648	-880
0.271388	-0.277208	-880
0.232046	-0.239088	-880
0.24458	-0.345501	-880
0.166902	-0.354052	-880
0.157198	-0.381011	-880
0.304345	-0.414485	-880
0.277929	-0.403382	-880
0.316602	-0.353487	-880
0.125879	0.107228	-920
0.123722	0.136639	-920
0.132059	0.173283	-920
0.155766	0.185305	-920
0.201627	0.0878263	-920
0.210084	0.031263	-920
0.183383	0.0082055	-920
0.16486	-0.0323715	-920
0.165377	-0.100291	-920
0.230432	-0.223444	-920
0.271702	-0.170564	-920
0.294169	-0.224259	-920
0.30377	-0.237103	-920
0.311707	-0.173238	-920
0.302181	-0.0757112	-920
0.308694	-0.0165472	-920
0.290085	0.025917	-920
0.290707	0.0850358	-920
0.345329	-0.118227	-920
0.415974	-0.139607	-920
0.33762	-0.315995	-920
0.247801	-0.331625	-920
0.0580974	0.18151	-1000
0.138048	0.203397	-1000
0.111345	-0.0147405	-1000
0.135084	0.00991007	-1000
0.189874	0.0792901	-1000
0.277411	0.0813449	-1000
0.265241	0.0117511	-1000
0.291225	0.0134162	-1000
0.250192	-0.0569671	-1000
0.23138	-0.0735487	-1000
0.201431	-0.142525	-1000
0.131065	-0.318695	-1000
0.285002	-0.148819	-1000
0.293259	-0.0955608	-1000
0.326359	-0.10085	-1000
0.31926	-0.186318	-1000
0.328781	-0.240206	-1000
0.274031	-0.435482	-1000
0.0365008	-0.113255	-1040
0.0777976	-0.0995597	-1040
0.0740539	0.0869487	-1040
0.076969	0.108527	-1040
0.103438	0.0857369	-1040
0.123529	0.0503549	-1040
0.143934	0.0391043	-1040
0.191348	0.153467	-1040
0.202123	-0.0616483	-1040
0.180907	-0.18352	-1040
0.204213	-0.156509	-1040
0.233339	-0.159135	-1040
0.253495	-0.0990058	-1040
0.271703	0.0119417	-1040
0.295028	-0.0672087	-1040
0.32505	-0.0929354	-1040
0.340844	-0.073517	-1040
0.29316	-0.172599	-1040
0.299575	-0.193378	-1040
0.27332	-0.208585	-1040
0.252448	-0.25023	-1040
0.244674	-0.332009	-1040
0.338818	-0.280442	-1040
0.139767	0.209501	-1080
0.198617	0.170537	-1080
0.208921	0.128032	-1080
0.217838	0.12701	-1080
0.170218	0.0509144	-1080
0.132153	0.00645891	-1080
0.147406	-0.0276649	-1080
0.157105	-0.0486323	-1080
0.176707	-0.0347846	-1080
0.21255	-0.0192385	-1080
0.191604	-0.0720938	-1080
0.248103	-0.0692844	-1080
0.260363	-0.076244	-1080
0.308104	-0.106946	-1080
0.319577	-0.112024	-1080
0.283646	-0.119341	-1080
0.281162	-0.141601	-1080
0.274354	-0.15763	-1080
0.260143	-0.168152	-1080
0.257462	-0.228131	-1080
0.263265	-0.265998	-1080
0.267268	-0.373958	-1080
0.0842837	0.141134	-1120
0.155505	0.240219	-1120
0.204615	0.263052	-1120
0.21161	0.2247	-1120
0.150327	0.131284	-1120
0.148989	0.0923162	-1120
0.139999	0.0769043	-1120
0.142081	0.0498197	-1120
0.0526461	-0.245374	-1120
0.176618	-0.363516	-1120
0.23286	-0.341501	-1120
0.297523	-0.245586	-1120
0.309871	-0.182583	-1120
0.270746	-0.190378	-1120
0.261941	-0.158874	-1120
0.28098	-0.109663	-1120
0.282654	-0.0858659	-1120
0.251709	-0.030973	-1120
0.217168	-0.0348684	-1120
0.26501	0.0222711	-1120
0.254596	0.0487539	-1120
0.277186	0.0928689	-1120
0.375079	0.108586	-1120
0.420689	-0.107822	-1120
0.033547	0.0437279	-1160
0.0679375	-0.0455287	-1160
0.0855572	-0.0554629	-1160
0.121168	0.0953542	-1160
0.243025	0.127305	-1160
0.275383	0.0858957	-1160
0.399955	0.00662238	-1160
0.324182	-0.0743026	-1160
0.226188	-0.0558138	-1160
0.243962	-0.15907	-1160
0.249546	-0.177604	-1160
0.273152	-0.177699	-1160
0.258165	-0.220476	-1160
0.315345	-0.271723	-1160
0.229398	-0.315782	-1160
0.250062	-0.397487	-1160
0.121533	0.0778444	-1200
0.135622	0.163654	-1200
0.236005	0.096863	-1200
0.198083	-0.0162805	-1200
0.17215	-0.0910092	-1200
0.153388	-0.121076	-1200
0.24844	-0.0629856	-1200
0.250415	-0.033271	-1200
0.307512	-0.152041	-1200
0.300917	-0.219793	-1200
0.26408	-0.253516	-1200
0.275309	-0.321125	-1200
0.294048	-0.338832	-1200
0.293684	-0.375916	-1200
0.318462	-0.302756	-1200
0.332951	-0.3055	-1200
0.339128	-0.370366	-1200
0.0716025	-0.0654463	-1240
0.0910329	-0.0916132	-1240
0.107609	0.0213651	-1240
0.105904	0.0470365	-1240
0.159572	0.0338622	-1240
0.199929	-2.33016e-06	-1240
0.180667	-0.0868589	-1240
0.22401	-0.0684953	-1240
0.217081	-0.118911	-1240
0.209684	-0.134653	-1240
0.247216	0.0241991	-1240
0.268636	0.0124496	-1240
0.261524	0.0520819	-1240
0.274978	-0.0708731	-1240
0.303576	-0.0227505	-1240
0.311364	-0.156497	-1240
0.290892	-0.206434	-1240
0.270703	-0.208647	-1240
0.309802	-0.274471	-1240
0.304617	-0.296976	-1240
0.301647	-0.326229	-1240
0.28563	-0.336104	-1240
0.358037	-0.311956	-1240
0.434519	-0.0905972	-1240
0.0691303	0.0953745	-1320
0.0197656	0.073466	-1320
0.156256	0.129044	-1320
0.144359	0.171361	-1320
0.189081	0.203306	-1320
0.203251	0.218333	-1320
0.231233	0.215933	-1320
0.239661	0.282801	-1320
0.276449	0.0579934	-1320
0.297598	0.0371778	-1320
0.329365	-0.000377269	-1320
0.323315	-0.190664	-1320
0.343186	-0.241925	-1320
0.384787	-0.236421	-1320
0.366332	-0.264981	-1320
0.382693	-0.277539	-1320
0.32765	-0.274733	-1320
0.360169	-0.162443	-1320
0.169435	0.207959	-1360
0.207979	0.21472	-1360
0.211461	0.0973977	-1360
0.334523	0.205435	-1360
0.289623	0.0505483	-1360
0.268163	0.00936	-1360
0.255208	-0.00441822	-1360
0.195169	-0.0377926	-1360
0.209528	-0.10994	-1360
0.201191	-0.270421	-1360
0.200869	-0.244854	-1360
0.224702	-0.246041	-1360
0.252792	-0.233524	-1360
0.0174318	0.0319296	-1400
0.0111401	0.0761909	-1400
0.172614	0.018965	-1400
0.180357	0.118977	-1400
0.21847	0.051229	-1400
0.259548	0.0644142	-1400
0.247961	0.0334534	-1400
0.295316	0.0200832	-1400
0.323631	-0.0455136	-1400
0.361338	-0.0262042	-1400
0.267579	-0.143061	-1400
0.264847	-0.187069	-1400
0.303327	-0.16967	-1400
0.281518	-0.23049	-1400
0.306412	-0.331787	-1400
0.363954	-0.279871	-1400
0.373224	-0.320448	-1400
0.266738	-0.397013	-1400
0.173024	0.146041	-1440
0.226566	0.216894	-1440
0.20529	0.132762	-1440
0.208828	-0.0566553	-1440
0.170707	-0.170367	-1440
0.251927	-0.0460898	-1440
0.310291	-0.0939383	-1440
0.343421	-0.069285	-1440
0.398516	0.0618545	-1440
0.38083	0.186546	-1440
0.422371	0.301307	-1440
0.351699	-0.145368	-1440
0.359198	-0.176279	-1440
0.368841	-0.263021	-1440
0.323019	-0.252284	-1440
0.283635	-0.244536	-1440
0.213086	-0.374357	-1440
0.0660385	-0.0702038	-1480
0.145264	-0.0705163	-1480
0.18384	-0.0185144	-1480
0.213809	-0.0567789	-1480
0.241645	-0.0319724	-1480
0.259771	-0.0363035	-1480
0.292859	0.0200614	-1480
0.312363	-0.0203366	-1480
0.326102	0.0189974	-1480
0.337503	-0.222942	-1480
0.33365	-0.310291	-1480
0.369637	-0.363752	-1480
0.160747	-0.361458	-1480
0.00972115	0.0209012	-1520
0.0192871	0.0660596	-1520
0.198677	0.102144	-1520
0.251703	0.0620579	-1520
0.288207	-0.0122632	-1520
0.303945	-0.03928	-1520
0.32245	-0.0474163	-1520
0.344803	0.00194291	-1520
0.372808	0.11655	-1520
0.352383	-0.0931045	-1520
0.223026	-0.086352	-1520
0.219994	-0.121356	-1520
0.180771	-0.117649	-1520
0.231152	-0.162113	-1520
0.251864	-0.144777	-1520
0.269694	-0.173785	-1520
0.286366	-0.150888	-1520
0.305746	-0.214104	-1520
0.319495	-0.185831	-1520
0.350568	-0.257583	-1520
0.150337	0.183432	-1560
0.172546	0.0720697	-1560
0.109834	0.0211055	-1560
0.336528	0.204108	-1560
0.304456	-0.22975	-1560
0.355371	-0.322647	-1560
0.30527	-0.399116	-1560
0.0655079	0.0785578	-1600
0.113166	0.025253	-1600
0.187549	-0.0943414	-1600
0.261789	0.0968761	-1600
0.324158	0.145535	-1600
0.354327	0.179592	-1600
0.418856	0.0791111	-1600
0.354577	0.00223351	-1600
0.34214	-0.0334429	-1600
0.41513	-0.124164	-1600
0.325869	-0.306681	-1600
0.32716	-0.238291	-1600
0.168449	-0.376562	-1600
0.0430616	0.0372883	-1680
0.189292	0.115	-1680
0.318358	0.225128	-1680
0.314195	-0.0301652	-1680
0.349949	-0.00929184	-1680
0.333071	-0.05582	-1680
0.401269	-0.174841	-1680
0.350301	-0.252998	-1680
0.308526	-0.23965	-1680
0.0339129	-0.0907218	-1760
0.262584	0.0207002	-1760
0.279514	0.0446903	-1760
0.367038	0.158671	-1760
0.329079	-0.0656234	-1760
0.292871	-0.0919747	-1760
0.318793	-0.13687	-1760
0.278722	-0.262356	-1760
0.326988	-0.298617	-1760
0.347082	-0.213943	-1760
0.395654	-0.204644	-1760
0.102901	0.106106	-1880
0.220212	0.0588729	-1880
0.342477	0.124936	-1880
0.368371	0.153728	-1880
0.40329	-0.203648	-1880
0.279587	-0.223446	-1880
0.232338	-0.351747	-1880
-0.0448211	-0.168799	1200
-0.0895126	-0.141861	1200
-0.0996759	-0.24758	1200
-0.133518	-0.267885	1200
-0.180205	-0.264316	1200
-0.250194	-0.320263	1200
-0.157456	0.0348896	1160
-0.214839	-0.256175	1160
-0.0580595	-0.0613068	1120
-0.246216	-0.0247126	1120
-0.22776	-0.154591	1120
-0.206831	-0.204105	1120
-0.165426	-0.205116	1120
-0.103107	0.0248497	1080
-0.120903	-0.0693042	1080
-0.136714	-0.167971	1080
-0.152219	-0.199997	1080
-0.0910942	-0.196717	1080
-0.0555925	-0.191774	1080
-0.117804	-0.0153749	1040
-0.148967	-0.0943796	1040
-0.165851	-0.162635	1040
-0.115516	-0.147756	1040
-0.110763	-0.0918838	1040
-0.084617	-0.211869	1040
-0.147321	-0.291373	1040
-0.229255	-0.286104	1040
-0.161093	0.0182419	1000
-0.14687	-0.116029	1000
-0.133794	-0.14202	1000
-0.113594	-0.114657	1000
-0.11693	-0.155043	1000
-0.131288	-0.24062	1000
-0.179529	-0.153538	1000
-0.0997155	-0.194176	960
-0.111114	-0.247127	960
-0.212202	0.207453	920
-0.0843376	-0.0541034	920
-0.142817	-0.101262	920
-0.136194	-0.149998	920
-0.115608	-0.248275	920
-0.147353	-0.254872	920
-0.209633	-0.230649	920
-0.241957	0.142522	880
-0.163218	-0.16613	880
-0.09682	-0.169492	880
-0.153716	-0.261023	880
-0.095827	-0.11369	840
-0.122989	-0.130182	840
-0.135151	-0.245074	840
-0.126375	-0.269612	840
-0.109103	-0.240459	840
-0.0758953	-0.189098	840
-0.0653221	-0.216601	840
-0.222402	0.128152	800
-0.13619	-0.222202	800
-0.292129	0.27258	720
-0.0550824	0.0161223	720
-0.128733	-0.0669817	720
-0.154271	-0.115908	720
-0.130805	-0.188659	720
-0.139171	-0.229963	720
-0.126108	-0.262076	720
-0.043233	-0.175966	720
-0.154709	-0.0931454	680
-0.109677	-0.215393	680
-0.061431	-0.187936	680
-0.132942	-0.0745057	680
-0.170604	-0.164788	640
-0.173197	-0.222754	640
-0.194762	-0.223512	640
-0.118848	-0.0551939	600
-0.0790872	-0.0578682	600
-0.137514	0.0216197	560
-0.109827	-0.199802	560
-0.126315	-0.288432	560
-0.100657	-0.298804	560
-0.0939333	-0.164648	560
-0.152635	-0.16665	520
-0.139942	-0.257107	520
-0.0833142	-0.198729	520
-0.0148603	-0.239088	480
-0.0824122	-0.269644	480
-0.101109	-0.260125	480
-0.181245	-0.246728	480
-0.247626	0.0456561	480
-0.120381	-0.134066	400
-0.113657	-0.157404	400
-0.12496	-0.205124	400
-0.167837	-0.211017	400
-0.0582747	0.132975	360
-0.0398885	-0.27669	360
-0.107156	-0.285426	360
-0.16317	-0.335658	360
-0.0957523	0.252287	280
-0.181695	0.073966	280
-0.112729	-0.175688	280
-0.118503	-0.198199	280
-0.059812	-0.218951	280
-0.0252858	0.210288	240
-0.100164	-0.189625	240
-0.104052	-0.194536	200
-0.252057	0.378998	160
-0.163436	0.267315	160
-0.234983	0.0568469	160
-0.10986	-0.198111	160
-0.0806235	-0.135565	160
-0.0826748	-0.219786	160
-0.0947554	-0.274004	160
-0.116876	0.0455171	120
-0.100809	-0.191459	120
-0.343001	0.351275	80
-0.119699	-0.196898	80
-0.0873335	-0.175178	80
-0.006552	0.0741264	40
-0.105634	-0.250428	40
-0.168796	0.165352	0
-0.20218	0.00840889	0
-0.104444	-0.156399	0
-0.140448	-0.267741	0
-0.0249886	-0.212252	-120
-0.177152	-0.354009	-120
-0.0863505	-0.177783	-160
-0.104493	-0.209236	-160
-0.116476	-0.214541	-160
-0.00731107	-0.133562	-200
-0.0409564	-0.0952403	-200
-0.100287	-0.145005	-200
-0.0881681	-0.254496	-200
-0.147802	-0.219555	-200
-0.00628822	0.0631393	-240
-0.0594608	-0.214171	-240
-0.0118579	0.064683	-280
-0.0735412	-0.127723	-280
-0.0458828	-0.248425	-280
-0.132872	-0.179237	-280
-0.0328682	-0.000712131	-320
-0.0780054	0.0663556	-320
-0.115111	-0.234427	-320
0.00813034	-0.0492357	-360
-0.0103259	-0.111737	-360
-0.0656395	0.0163631	-360
-0.0451168	-0.190157	-360
-0.0614797	-0.251552	-360
-0.145724	-0.25772	-360
-0.223496	-0.165444	-360
-0.00690943	-0.168168	-440
-0.0851323	-0.241762	-440
-0.114446	-0.296203	-440
-0.166874	-0.207758	-440
-0.108526	-0.00396439	-440
-0.229561	0.375952	-440
-0.03083	-0.0806588	-480
-0.0757816	-0.156715	-480
-0.103585	-0.172794	-480
-0.12637	-0.294349	-480
-0.170646	-0.239169	-480
-0.0253544	-0.0644213	-560
-0.063957	-0.268589	-560
-0.057427	-0.311354	-560
-0.105406	-0.254119	-560
-0.130876	-0.321399	-560
-0.102046	-0.272458	-600
-0.123768	-0.345095	-600
-0.0280158	-0.168636	-640
-0.118345	-0.190829	-640
-0.0479004	0.263677	-680
-0.416953	0.316026	-680
-0.0145048	-0.227194	-680
-0.111503	-0.279895	-680
-0.136925	-0.277872	-680
-0.160203	-0.258725	-680
-0.182057	-0.218791	-680
-0.203862	-0.279103	-680
-0.240937	-0.188359	-680
-0.297894	0.571277	-720
-0.235182	-0.17106	-720
-0.0485824	-0.140396	-720
-0.144963	-0.140522	-760
-0.127155	-0.103295	-760
-0.0459353	-0.35661	-760
-0.0290961	-0.00245757	-800
-0.0350566	-0.277047	-800
-0.0295204	-0.101285	-880
-0.116014	-0.102732	-880
-0.129961	-0.0928362	-880
-0.0659679	-0.243939	-880
-0.101652	-0.243444	-880
-0.117048	-0.31113	-880
-0.122796	-0.34015	-880
-0.133516	-0.327644	-880
-0.0679048	-0.325849	-920
-0.309695	0.0591867	-1000
-0.20111	-0.235315	-1000
-0.158053	-0.207716	-1000
-0.133397	-0.18299	-1000
-0.111917	-0.208904	-1000
-0.137155	-0.298132	-1000
-0.132885	-0.252263	-1040
-0.0404815	-0.246909	-1040
-0.00953993	0.0393037	-1080
-0.00823084	0.0825039	-1080
-0.149836	-0.0951531	-1080
-0.224787	-0.122722	-1080
-0.153796	-0.255621	-1080
-0.182411	-0.310304	-1080
-0.190013	-0.333387	-1080
-0.315799	0.145808	-1120
-0.23177	0.0679421	-1120
-0.179077	-0.106343	-1120
-0.189396	-0.151995	-1120
-0.170992	-0.158995	-1120
-0.165543	-0.234511	-1120
-0.0856972	-0.217146	-1120
-0.260482	0.00260757	-1160
-0.189163	-0.0555357	-1160
-0.152903	-0.0838298	-1160
-0.156953	-0.108439	-1160
-0.178789	-0.114432	-1160
-0.189701	-0.144779	-1160
-0.166535	-0.135448	-1160
-0.148264	-0.188841	-1160
-0.146214	-0.285983	-1160
-0.0965365	-0.251659	-1160
-0.0234152	0.0982359	-1200
-0.324566	0.0797124	-1200
-0.229992	-0.0227163	-1200
-0.134525	-0.174047	-1200
-0.106031	-0.308017	-1200
-0.0650042	-0.26324	-1200
-0.214505	-0.0107754	-1240
-0.208722	-0.212981	-1240
-0.194872	-0.259532	-1240
-0.140309	-0.307157	-1240
-0.119034	-0.286035	-1240
-0.0726153	-0.193724	-1240
0.0716981	-0.00521873	-1280
0.115545	-0.0304109	-1280
0.162225	-0.0813718	-1280
0.179257	-0.126892	-1280
0.215782	-0.0847346	-1280
0.187602	0.000630294	-1280
0.201432	0.0422175	-1280
0.152847	0.128229	-1280
0.208297	0.219952	-1280
0.173918	0.286209	-1280
0.24005	0.0186613	-1280
0.274536	0.0729309	-1280
0.30394	-0.0108994	-1280
0.28938	-0.0599282	-1280
0.44537	-0.0302637	-1280
0.376157	-0.184657	-1280
0.288188	-0.321708	-1280
0.320157	-0.314483	-1280
0.327299	-0.351171	-1280
0.325149	-0.394511	-1280
-0.110009	0.0535458	-1280
-0.24319	0.0473799	-1280
-0.239022	0.111135	-1280
-0.108793	-0.249179	-1280
-0.119548	-0.303219	-1280
-0.187745	-0.295291	-1280
-0.24904	-0.337338	-1280
-0.246499	0.00771773	-1320
-0.168078	-0.145035	-1320
-0.218882	-0.243732	-1320
-0.241515	-0.278976	-1320
-0.268731	-0.344322	-1320
-0.204421	-0.298137	-1320
-0.13313	-0.289445	-1320
-0.0724973	-0.233947	-1320
-0.0772702	0.10465	-1360
-0.140704	0.0176353	-1360
-0.185146	-0.0892319	-1360
-0.207887	-0.100697	-1360
-0.190551	-0.154073	-1360
-0.171152	-0.223907	-1360
-0.19142	-0.260805	-1360
-0.209342	-0.310651	-1360
-0.157242	-0.290851	-1360
-0.0781068	-0.235502	-1360
-0.0992139	-0.0375559	-1400
-0.232549	-0.0846416	-1400
-0.153325	-0.215915	-1400
-0.134921	-0.22402	-1400
-0.137441	-0.253138	-1400
-0.183565	-0.264945	-1400
-0.236617	-0.332277	-1400
-0.199218	0.0573291	-1440
-0.27012	-0.162877	-1440
-0.247082	-0.263273	-1440
-0.201617	-0.220649	-1440
-0.18496	-0.256147	-1440
-0.146129	-0.201461	-1440
-0.138546	-0.240184	-1440
-0.112012	-0.18801	-1440
-0.085966	-0.22915	-1440
-0.0874087	-0.182988	-1440
-0.215254	-0.0447906	-1480
-0.0969154	-0.214715	-1480
-0.265958	-0.344538	-1480
-0.068002	-0.0388019	-1520
-0.175734	-0.0967152	-1520
-0.17691	-0.260794	-1520
-0.149383	-0.249362	-1520
-0.107761	-0.272511	-1520
-0.0849894	-0.275242	-1520
-0.174557	-0.32327	-1520
-0.193207	-0.152514	-1560
-0.183271	-0.186493	-1560
-0.102602	-0.205568	-1560
-0.0782588	-0.208579	-1560
-0.107156	-0.272297	-1560
-0.377479	0.339445	-1600
-0.235756	0.0289964	-1600
-0.233211	-0.195788	-1600
-0.188609	-0.184807	-1600
-0.211176	-0.236367	-1600
-0.158565	-0.268568	-1600
-0.1073	-0.246259	-1600
-0.089011	-0.219162	-1600
-0.377828	0.0332741	-1680
-0.353572	-0.0777828	-1680
-0.323782	-0.105275	-1680
-0.303615	-0.13457	-1680
-0.233239	-0.320743	-1680
-0.227127	-0.289014	-1680
-0.192517	-0.315601	-1680
-0.317632	-0.323618	-1680
-0.394886	-0.296666	-1680
-0.0125083	-0.0258757	-1760
-0.0485674	-0.136132	-1760
-0.102836	-0.256621	-1760
-0.154038	-0.266558	-1760
-0.18191	-0.333812	-1760
-0.315078	-0.239099	-1760
-0.394022	0.181291	-1880
-0.129047	-0.0815658	-1880
-0.191895	-0.117558	-1880
-0.252623	-0.247939	-1880
-0.242309	-0.261236	-1880
-0.221256	-0.282838	-1880
-0.252324	-0.348764	-1880

## Sheet: Sheet2
0.300306	-0.225868	800
0.30626	-0.183467	720
0.271912	-0.225487	160
0.311955	-0.113465	120
0.303731	-0.136275	40
0.28416	-0.140713	40
0.269245	-0.231443	40
0.283198	-0.119315	0
0.347656	-0.169209	-80
0.321096	-0.150653	-80
0.297542	-0.16579	-160
0.307039	-0.225293	-160
0.299978	-0.253781	-160
0.282546	-0.144603	-200
0.307591	-0.124867	-360
0.293952	-0.178391	-360
0.286875	-0.156611	-480
0.331883	-0.103346	-560
