# Supplementary material for: Spinal premotor interneurons controlling antagonistic muscles are spatially intermingled
Source: eLife. 2022 Dec 13;11:e81976. doi: 10.7554/eLife.81976 (PMC9844990; doi:10.7554/eLife.81976)
Supplement: Figure 12—figure supplement 11—source data 4. [file elife-81976-fig12-figsupp11-data4.xlsx]

## Sheet: Sheet1
0.0380296	-0.00189897	1160
0.0823974	0.130603	1160
0.0966334	0.474335	1160
0.220198	0.292651	1160
0.16843	0.12073	1160
0.229845	0.0891211	1160
0.262628	0.135777	1160
0.18224	-0.0448453	1160
0.167823	-0.0831798	1160
0.205885	-0.0765741	1160
0.243996	-0.235401	1160
0.0304599	-0.013029	1120
0.0949924	0.10613	1120
0.127856	0.413237	1120
0.207356	0.282475	1120
0.254859	0.302964	1120
0.317618	0.132624	1120
0.290605	0.0566564	1120
0.245624	0.0732604	1120
0.179703	-0.105196	1120
0.165053	-0.14236	1120
0.156669	-0.237502	1120
0.218989	-0.161494	1120
0.230941	-0.114611	1120
0.314917	-0.138697	1120
0.354379	-0.0687024	1120
0.303041	-0.338307	1120
0.270565	-0.307289	1120
0.228042	-0.273956	1120
0.340187	-0.309444	1120
0.108854	0.198138	1080
0.132594	0.214462	1080
0.164328	0.239958	1080
0.194612	0.18357	1080
0.110651	-0.0424909	1080
0.112221	-0.0921996	1080
0.179691	-0.108922	1080
0.227312	-0.150402	1080
0.252067	-0.176488	1080
0.301952	-0.147013	1080
0.284585	-0.0748074	1080
0.269384	-0.0169567	1080
0.298457	0.0728384	1080
0.282215	0.115632	1080
0.323141	-0.0533808	1080
0.0255341	0.0617689	1040
0.0489371	0.110038	1040
0.0914873	0.167952	1040
0.0840415	0.102304	1040
0.139359	0.0540463	1040
0.158513	0.00578897	1040
0.130847	0.0193005	1040
0.215955	0.189186	1040
0.168083	0.384161	1040
0.251066	0.158296	1040
0.324471	-0.0849487	1040
0.332976	-0.113905	1040
0.332976	-0.125483	1040
0.276593	-0.115839	1040
0.228722	-0.202709	1040
0.25319	-0.229733	1040
0.224466	-0.291513	1040
0.311704	-0.355216	1040
0.389365	-0.306959	1040
0.039542	0.075553	1000
0.0963296	0.228103	1000
0.139885	0.284828	1000
0.18629	0.35535	1000
0.206511	0.288194	1000
0.182066	0.13336	1000
0.122508	0.0575569	1000
0.200071	-0.0265115	1000
0.205674	0.00298752	1000
0.225898	0.0282953	1000
0.252421	-0.0285477	1000
0.277005	-0.0624937	1000
0.257202	-0.0993152	1000
0.24626	-0.135166	1000
0.219805	-0.111065	1000
0.216068	-0.130732	1000
0.265996	-0.188898	1000
0.332269	-0.36089	1000
0.218624	-0.355846	1000
0.193279	-0.300792	1000
0.0884736	0.231043	960
0.134142	0.138469	960
0.131269	-0.0167734	960
0.0872612	-0.041488	960
0.152975	-0.146819	960
0.177855	-0.0637812	960
0.190661	-0.0613931	960
0.203192	-0.032248	960
0.169264	-0.0220664	960
0.171635	0.0794529	960
0.179196	0.142753	960
0.19469	0.155955	960
0.20157	0.190242	960
0.208364	0.162623	960
0.203205	0.136917	960
0.193711	0.302232	960
0.284068	0.263386	960
0.31453	0.215437	960
0.280014	-0.0591743	960
0.253806	-0.179582	960
0.277474	-0.199924	960
0.320717	-0.350697	960
0.261995	-0.361648	960
0.232025	-0.344545	960
0.196849	-0.309853	960
0.0245057	0.0145948	920
0.0753573	0.0223992	920
0.0956935	0.0933864	920
0.0883404	-0.0368957	920
0.0778705	-0.171478	920
0.145717	0.0324607	920
0.135941	0.0627185	920
0.131654	0.0916436	920
0.193856	0.147828	920
0.196067	0.177501	920
0.194565	0.281275	920
0.224582	0.263156	920
0.244271	0.19874	920
0.242266	0.16321	920
0.225435	0.116163	920
0.246693	0.0382	920
0.289918	0.107892	920
0.302758	-0.0396862	920
0.364676	0.0243237	920
0.408777	-0.176542	920
0.248627	-0.200853	920
0.203489	-0.0628727	920
0.187931	-0.176455	920
0.239523	-0.250927	920
0.223135	-0.341081	920
0.274864	-0.327282	920
0.317026	-0.381266	920
0.130423	0.041742	880
0.184559	0.0452139	880
0.203836	0.17581	880
0.214975	0.192229	880
0.236664	0.148635	880
0.245478	0.132442	880
0.250703	0.205835	880
0.246675	0.31944	880
0.285707	0.110862	880
0.26811	-0.0113572	880
0.215364	-0.104883	880
0.183113	-0.13784	880
0.19036	-0.266827	880
0.248178	-0.200334	880
0.253308	-0.313705	880
0.278722	-0.380594	880
0.349405	-0.34149	880
0.0680542	0.0341501	840
0.0694824	0.110897	840
0.089305	0.135211	840
0.0850814	0.214431	840
0.169941	0.0946105	840
0.199107	0.13814	840
0.201253	0.165581	840
0.233461	0.23886	840
0.215798	0.295629	840
0.265474	0.233688	840
0.249902	0.00845051	840
0.173318	-0.0550023	840
0.1832	-0.109902	840
0.198918	-0.115658	840
0.216607	-0.29413	840
0.341618	-0.344556	840
0.386917	-0.298428	840
0.0366827	-0.0601788	760
0.0420051	-0.00344459	760
0.0748415	0.100486	760
0.0882724	0.17362	760
0.115773	0.344716	760
0.147153	0.349437	760
0.132674	0.0915246	760
0.13183	-0.0436827	760
0.12516	-0.0216837	760
0.194372	0.224769	760
0.196589	0.278992	760
0.255942	0.303928	760
0.249406	0.195304	760
0.283622	0.033569	760
0.202794	-0.330922	760
0.0319905	0.0241533	720
0.043739	0.00644221	720
0.0611405	-0.0161715	720
0.090373	0.057395	720
0.135287	0.0620661	720
0.141507	-0.0106528	720
0.12698	-0.0394153	720
0.132053	0.23524	720
0.116005	0.272099	720
0.186897	0.177897	720
0.233842	0.280853	720
0.234161	0.0252063	720
0.275197	0.00316984	720
0.278376	-0.0921118	720
0.197982	-0.135594	720
0.205114	-0.186149	720
0.222412	-0.264722	720
0.202613	-0.314492	720
0.153794	-0.287951	720
0.0946026	-0.133567	720
0.0664417	0.00846146	680
0.115085	0.0685722	680
0.097386	0.199736	680
0.196624	0.159085	680
0.218917	0.179363	680
0.249767	0.201922	680
0.231886	-0.00435718	680
0.291091	-0.10673	680
0.283938	-0.136097	680
0.26848	-0.189079	680
0.0381988	-0.140052	680
0.178991	-0.332265	680
0.189907	-0.347342	680
0.232145	-0.37864	680
0.242927	-0.382081	680
0.272774	-0.365383	680
0.301854	-0.37393	680
0.332917	-0.368814	680
0.381926	-0.250511	680
0.0447485	0.187306	640
0.0497529	0.129061	640
0.0714534	0.0868362	640
0.088184	0.171777	640
0.0885142	0.196127	640
0.104461	-0.00888537	640
0.0104826	-0.0616955	640
0.145332	-0.115906	640
0.154688	0.06957	640
0.179269	0.108733	640
0.203905	0.145872	640
0.205939	0.18462	640
0.21724	0.236522	640
0.207334	0.314497	640
0.24501	0.241581	640
0.217123	0.135157	640
0.197491	0.0397733	640
0.253794	0.0601007	640
0.299107	0.0184209	640
0.307616	-0.0840205	640
0.252839	-0.189316	640
0.205657	-0.332296	640
0.305939	-0.38015	640
0.373584	-0.238986	640
0.0416266	0.113804	600
0.0690376	0.10313	600
0.0738774	0.152443	600
0.0937988	0.138999	600
0.127597	0.00219888	600
0.207896	-0.00465185	600
0.2061	0.0166151	600
0.199453	0.150515	600
0.208957	0.15741	600
0.195628	0.167666	600
0.190768	0.215909	600
0.201751	0.275646	600
0.218144	0.238402	600
0.22559	0.20995	600
0.246021	-0.0122046	600
0.266061	-0.222706	600
0.377945	-0.235869	600
0.24674	-0.324324	600
0.0872998	-0.248037	600
0.145432	0.296092	560
0.11914	0.198705	560
0.0943359	0.0615905	560
0.0436118	0.00512341	560
0.0158105	0.055398	560
0.13337	-0.0205379	560
0.140515	-0.0790327	560
0.0877498	-0.256777	560
0.182772	-0.15538	560
0.201645	-0.0790548	560
0.224208	-0.0442722	560
0.225094	-0.131368	560
0.215009	0.108847	560
0.202781	0.131201	560
0.196022	0.151828	560
0.219028	0.143062	560
0.230704	0.175606	560
0.27205	0.296193	560
0.260001	0.0856032	560
0.288489	0.0751116	560
0.343148	-0.0406301	560
0.328044	-0.0581385	560
0.296847	-0.102655	560
0.311258	-0.124942	560
0.381143	-0.234536	560
0.411409	-0.313145	560
0.301456	-0.341133	560
0.26219	-0.34423	560
0.0371998	0.00391059	520
0.0733043	-0.0468788	520
0.118164	-0.0527326	520
0.11379	0.121095	520
0.10066	0.230471	520
0.11926	0.226561	520
0.159739	0.154299	520
0.169583	-0.0410129	520
0.223199	-0.0566432	520
0.230852	0.117185	520
0.237418	0.162108	520
0.247268	0.253911	520
0.287747	0.285159	520
0.336982	0.0195288	520
0.296503	-0.0429682	520
0.254922	-0.0976561	520
0.241799	-0.208987	520
0.243983	-0.26563	520
0.0929995	-0.246089	520
0.171774	-0.220707	520
0.269148	-0.339847	520
0.264773	-0.367185	520
0.309627	-0.333981	520
0.320573	-0.0859364	520
0.330417	-0.171873	520
0.0573649	0.197914	480
0.0672695	-0.00790623	480
0.108917	0.00517496	480
0.089936	0.221257	480
0.125178	0.253332	480
0.121427	0.299418	480
0.134229	0.298104	480
0.150691	0.197672	480
0.176402	0.211378	480
0.216657	0.230263	480
0.19272	0.168018	480
0.19459	0.154149	480
0.20719	0.101818	480
0.235705	0.0855455	480
0.173947	0.0355124	480
0.161111	0.0918706	480
0.277442	0.351449	480
0.24112	0.374179	480
0.130067	-0.139101	480
0.114828	-0.150534	480
0.18829	-0.210116	480
0.221034	-0.280527	480
0.222455	-0.323025	480
0.235716	-0.314045	480
0.238729	-0.293005	480
0.277534	-0.194928	480
0.0884648	0.0326093	440
0.0892347	0.0549601	440
0.0841125	0.070877	440
0.0635583	0.132846	440
0.0926692	0.154667	440
0.113676	0.171957	440
0.105778	0.0743303	440
0.105963	0.0467373	440
0.12389	0.00738972	440
0.183222	0.116434	440
0.17166	0.175962	440
0.175376	0.0532734	440
0.192282	0.0502135	440
0.207114	0.0197295	440
0.200098	-0.0193593	440
0.196833	-0.0811588	440
0.22362	-0.0608778	440
0.234619	-0.00487062	440
0.220556	0.0807086	440
0.229001	0.128301	440
0.208935	0.138515	440
0.21274	0.183037	440
0.247446	0.169932	440
0.260199	0.112036	440
0.308836	0.108166	440
0.331285	0.101204	440
0.279859	0.0242856	440
0.28165	0.0103486	440
0.314099	-0.0353206	440
0.330656	-0.0487066	440
0.355718	-0.0455342	440
0.258623	-0.0653881	440
0.321264	-0.123802	440
0.306993	-0.241608	440
0.257757	-0.222171	440
0.26373	-0.312284	440
0.293085	-0.3491	440
0.284041	-0.381125	440
0.332981	-0.376401	440
0.195864	-0.306885	440
0.0854203	0.162539	400
0.105775	0.156588	400
0.109586	0.183732	400
0.127541	0.12691	400
0.119059	0.0786197	400
0.101247	0.0646637	400
0.160879	0.107885	400
0.15294	0.269842	400
0.245036	0.223373	400
0.254242	0.22246	400
0.261031	0.208033	400
0.219036	0.0962211	400
0.243338	0.0466487	400
0.254999	-0.0154376	400
0.279059	0.00183262	400
0.304401	0.0287971	400
0.336186	-0.00972885	400
0.321387	-0.139957	400
0.292356	-0.113492	400
0.145162	-0.0183193	400
0.152536	-0.125178	400
0.0472533	-0.187475	400
0.0863565	-0.220826	400
0.183494	-0.346426	400
0.216706	-0.218023	400
0.317037	-0.263342	400
0.312059	-0.219606	400
0.346701	-0.152287	400
0.343877	-0.104831	400
0.0635133	0.337449	360
0.0907518	0.374476	360
0.0980369	0.209378	360
0.0760437	0.178215	360
0.106587	0.190326	360
0.13188	0.198494	360
0.136937	0.237021	360
0.185201	0.289821	360
0.229436	0.307945	360
0.25144	0.337187	360
0.130067	0.146579	360
0.1376	0.121755	360
0.158892	0.0914171	360
0.144299	0.0584735	360
0.144543	0.0162052	360
0.170936	0.0167082	360
0.194155	0.0171507	360
0.181863	0.136049	360
0.188091	0.15345	360
0.198726	0.140202	360
0.193171	0.188133	360
0.230066	0.198444	360
0.246045	0.173769	360
0.232708	0.106274	360
0.232138	0.0217176	360
0.315727	0.173176	360
0.315534	0.023307	360
0.28117	-0.0599604	360
0.249339	-0.0317446	360
0.214832	-0.0900472	360
0.201418	-0.144105	360
0.168365	-0.0870897	360
0.148218	-0.0721017	360
0.154403	-0.229535	360
0.241756	-0.181754	360
0.248566	-0.264249	360
0.311659	-0.220773	360
0.288577	-0.246193	360
0.279523	-0.140695	360
0.29238	-0.173103	360
0.391246	-0.107821	360
0.394568	-0.134659	360
0.395999	-0.199951	360
0.378185	-0.223348	360
0.367191	-0.33115	360
0.31529	-0.301407	360
0.32996	-0.281912	360
0.33772	-0.162644	360
0.313732	-0.0305174	360
0.0879377	0.00298953	280
0.130831	0.0566814	280
0.12997	0.0756777	280
0.138362	0.088695	280
0.168362	0.0896703	280
0.163762	0.0385968	280
0.17146	-0.0242438	280
0.210851	-0.0140783	280
0.0926301	0.17737	280
0.0807247	0.232747	280
0.0556604	0.318888	280
0.168576	0.226249	280
0.213793	0.194511	280
0.225271	0.205535	280
0.24551	0.0436632	280
0.237916	0.11789	280
0.272574	0.175631	280
0.104397	0.106811	280
0.280145	-0.0143116	280
0.271106	-0.0974937	280
0.229836	-0.0867452	280
0.259981	-0.29634	280
0.291085	-0.287818	280
0.303059	-0.335605	280
0.322963	-0.307768	280
0.367492	-0.301546	280
0.383368	-0.262196	280
0.367995	-0.24655	280
0.217295	-0.327284	280
0.19924	-0.266023	280
0.18225	-0.314817	280
0.236587	-0.253885	280
0.248439	-0.201136	280
0.22634	-0.130272	280
0.332268	-0.0823034	280
0.0585894	0.297786	240
0.0832629	0.327992	240
0.0714042	0.260984	240
0.0983387	0.158011	240
0.0875024	0.0929981	240
0.0765578	0.0397383	240
0.0605439	-0.0274061	240
0.0650058	-0.0605703	240
0.124083	-0.0410074	240
0.143362	0.0105756	240
0.142105	0.034049	240
0.122928	0.0843615	240
0.135466	0.190575	240
0.17435	0.14483	240
0.174729	0.103686	240
0.196762	0.194542	240
0.244726	0.292119	240
0.216841	0.0462901	240
0.227124	0.0583838	240
0.232446	0.0448391	240
0.190075	0.0179766	240
0.186256	-0.0193695	240
0.231821	-0.000248821	240
0.203004	-0.144228	240
0.241256	-0.121424	240
0.250138	-0.0701809	240
0.283742	-0.106315	240
0.344081	0.00146285	240
0.321158	-0.21874	240
0.301777	-0.258557	240
0.295991	-0.307725	240
0.233908	-0.339155	240
0.241912	-0.305583	240
0.214821	-0.298635	240
0.189053	-0.322993	240
0.00701935	-0.0623407	200
0.0451816	-0.0452471	200
0.0616541	-0.0454252	200
0.063841	-0.00457672	200
0.0785045	0.076997	200
0.0281014	0.0969976	200
0.0337301	0.254566	200
0.063617	0.262027	200
0.113183	0.30625	200
0.140813	0.247572	200
0.125878	0.0764847	200
0.123727	0.0453695	200
0.148416	0.0373179	200
0.143129	-0.00933252	200
0.160569	-0.0309258	200
0.150219	-0.0483202	200
0.192884	0.0971647	200
0.220355	0.326495	200
0.239627	0.228985	200
0.26942	0.205309	200
0.281873	0.236313	200
0.351502	0.103234	200
0.316181	0.00241601	200
0.273876	-0.0243666	200
0.267788	0.00488853	200
0.248356	0.0498571	200
0.25768	0.0692238	200
0.277718	-0.115862	200
0.236586	-0.0959619	200
0.21571	-0.187202	200
0.193108	-0.169439	200
0.169233	-0.231458	200
0.15171	-0.235155	200
0.18953	-0.328967	200
0.216288	-0.337041	200
0.227492	-0.378034	200
0.242928	-0.382088	200
0.270964	-0.306506	200
0.278437	-0.219007	200
0.318656	-0.201936	200
0.359594	-0.28606	200
0.0244651	-0.02214	160
0.0466705	-0.0534618	160
0.061875	-0.0208658	160
0.0668946	0.0217311	160
0.0502532	0.0713477	160
0.0795417	0.132877	160
0.110716	0.0319022	160
0.140587	0.0709948	160
0.128706	-0.0532684	160
0.170287	-1.09366e-05	160
0.170895	0.0298091	160
0.166281	0.058116	160
0.167116	0.0991085	160
0.183821	0.103614	160
0.195607	0.121499	160
0.185732	0.146416	160
0.171395	0.207079	160
0.210381	0.183984	160
0.23672	0.202779	160
0.288024	0.0706197	160
0.274098	-0.00123948	160
0.259318	-0.0133339	160
0.241765	-0.00845307	160
0.226598	-0.0391831	160
0.189511	-0.0759323	160
0.171585	-0.140066	160
0.166768	-0.223735	160
0.172851	-0.281999	160
0.21204	-0.346167	160
0.238075	-0.342276	160
0.250912	-0.221812	160
0.2678	-0.157599	160
0.284315	-0.162423	160
0.214293	-0.133547	160
0.282909	-0.0783438	160
0.271079	-0.0477049	160
0.375459	-0.0209794	160
0.350386	-0.232097	160
0.370623	-0.207295	160
0.395272	-0.169727	160
0.055276	0.124549	80
0.0850512	0.0657063	80
0.0987834	0.183212	80
0.139168	0.184769	80
0.143739	0.203009	80
0.17168	0.221854	80
0.144248	0.110619	80
0.151162	0.0197294	80
0.193768	0.0876867	80
0.198687	0.00429935	80
0.211839	0.0276122	80
0.209393	0.131189	80
0.212258	0.173526	80
0.226795	0.154289	80
0.231971	0.207589	80
0.305022	0.0116109	80
0.30264	-0.00303506	80
0.332511	0.00462391	80
0.386403	-0.0111535	80
0.278362	-0.0553271	80
0.291064	-0.179764	80
0.360838	-0.198218	80
0.388714	-0.183068	80
0.402897	-0.100688	80
0.304436	-0.326406	80
0.261604	-0.285345	80
0.244627	-0.345419	80
0.228455	-0.359338	80
0.206457	-0.341556	80
0.186075	-0.231485	80
0.174532	-0.284449	80
0.412509	-0.280385	80
0.118683	0.0454614	80
0.314666	0.0776089	80
0.293543	0.0842714	80
0.343572	0.0299079	80
0.0790382	0.0253843	80
0.0878152	0.099209	40
0.0875205	0.195425	40
0.121295	0.127643	40
0.135739	0.205987	40
0.156974	0.124028	40
0.15286	0.0959228	40
0.188274	0.178515	40
0.203013	0.162637	40
0.306966	0.12972	40
0.197382	0.288873	40
0.249905	0.265402	40
0.251035	0.23935	40
0.298786	0.0594739	40
0.28306	0.057291	40
0.282126	0.0191867	40
0.326132	0.0377163	40
0.343376	-0.112435	40
0.399412	-0.256143	40
0.281782	-0.21135	40
0.301906	-0.273277	40
0.239527	-0.113597	40
0.176576	-0.112294	40
0.161819	-0.088401	40
0.193777	-0.246415	40
0.195195	-0.368684	40
0.198444	-0.400721	40
0.211002	-0.390558	40
0.235093	-0.378259	40
0.0233913	0.0870217	0
0.0827179	0.0286069	0
0.112951	0.0660918	0
0.124949	0.0834174	0
0.0909871	0.183991	0
0.174462	0.272465	0
0.163431	0.12336	0
0.180188	0.155371	0
0.19214	0.128199	0
0.178374	0.0511649	0
0.198335	0.0864978	0
0.212443	0.105404	0
0.226253	0.139851	0
0.261515	0.110666	0
0.262501	0.13179	0
0.299086	0.0656149	0
0.220858	0.0459259	0
0.162188	-0.0777166	0
0.154235	-0.182823	0
0.141986	-0.227209	0
0.205716	-0.365715	0
0.22395	-0.345568	0
0.260508	-0.303351	0
0.320885	-0.317425	0
0.338198	-0.295196	0
0.359278	-0.279393	0
0.356354	-0.124068	0
0.408216	-0.233466	0
0.408445	-0.272221	0
0.383015	-0.337597	0
0.360424	-0.233143	0
0.0459829	0.0816172	-80
0.0478272	0.135656	-80
0.0619233	0.127529	-80
0.0680585	0.0922864	-80
0.0791552	0.0778811	-80
0.100237	0.0843776	-80
0.120288	0.0991808	-80
0.125411	0.066005	-80
0.143525	0.0579293	-80
0.165638	0.0561318	-80
0.10785	0.22576	-80
0.202486	0.168794	-80
0.218601	0.156532	-80
0.263366	0.308777	-80
0.222842	0.0817969	-80
0.249134	0.0260373	-80
0.2813	0.0243683	-80
0.271445	-0.0422402	-80
0.221277	-0.0678154	-80
0.211292	-0.0887172	-80
0.227449	-0.115525	-80
0.238708	-0.183944	-80
0.253772	-0.179604	-80
0.219675	-0.202881	-80
0.21172	-0.232077	-80
0.135341	-0.228893	-80
0.19994	-0.325724	-80
0.274202	-0.291534	-80
0.27337	-0.34972	-80
0.265024	-0.245943	-80
0.334281	-0.220124	-80
0.335113	-0.161938	-80
0.357096	-0.120108	-80
0.395565	-0.215181	-80
0.408717	-0.244107	-80
0.41746	-0.144258	-80
0.341621	0.0147519	-80
0.0415252	-0.0221073	-120
0.0701303	0.121903	-120
0.0772996	0.152778	-120
0.104214	0.165401	-120
0.120593	0.235379	-120
0.128724	0.290901	-120
0.138629	0.091898	-120
0.140884	0.0303349	-120
0.20486	0.12959	-120
0.193335	0.172571	-120
0.193234	0.207466	-120
0.215133	0.162558	-120
0.237828	0.199768	-120
0.23362	0.220242	-120
0.288558	0.220865	-120
0.293187	0.0546404	-120
0.254937	0.0172662	-120
0.252932	-0.00534757	-120
0.229068	0.00259785	-120
0.234463	-0.0712474	-120
0.256332	-0.105895	-120
0.284071	-0.0193566	-120
0.374018	0.061716	-120
0.230688	-0.198556	-120
0.249359	-0.204504	-120
0.241169	-0.239492	-120
0.325133	-0.240597	-120
0.345804	-0.219829	-120
0.369567	-0.19288	-120
0.361507	-0.273024	-120
0.382202	-0.260471	-120
0.264243	-0.331614	-120
0.0692656	-0.00348154	-160
0.0684061	0.0241042	-160
0.0918156	0.0196506	-160
0.104054	0.0213555	-160
0.124741	0.0740548	-160
0.0890939	0.0768035	-160
0.0893123	0.114188	-160
0.0598272	0.124677	-160
0.107982	0.170874	-160
0.100955	0.188748	-160
0.103088	0.204439	-160
0.115366	0.214017	-160
0.177213	0.161491	-160
0.211102	0.206028	-160
0.247476	0.154056	-160
0.265859	0.16153	-160
0.278899	0.125804	-160
0.299058	0.0879637	-160
0.26619	0.0434045	-160
0.262939	0.0100176	-160
0.276878	-0.0454082	-160
0.324511	-0.0897505	-160
0.247094	-0.0860913	-160
0.225869	-0.0561021	-160
0.18892	-0.102544	-160
0.308206	-0.264583	-160
0.321838	-0.197952	-160
0.378872	-0.203139	-160
0.380447	-0.281907	-160
0.285449	-0.323152	-160
0.265771	-0.377833	-160
0.243341	-0.379316	-160
0.23644	-0.339792	-160
0.0728503	-0.0221737	-200
0.0771312	0.115643	-200
0.105121	0.0693699	-200
0.11882	0.126057	-200
0.125027	0.139653	-200
0.129378	0.0586937	-200
0.147756	0.0718795	-200
0.175441	0.104443	-200
0.162124	0.203434	-200
0.199768	0.101648	-200
0.24794	0.26952	-200
0.254193	0.174702	-200
0.271168	0.144568	-200
0.28105	0.114673	-200
0.310444	0.11172	-200
0.321811	0.134976	-200
0.316028	0.16868	-200
0.199533	-0.0382676	-200
0.198253	-0.0677858	-200
0.167984	-0.0490229	-200
0.186568	-0.126515	-200
0.270504	-0.156934	-200
0.323432	-0.251352	-200
0.363359	-0.211318	-200
0.370963	-0.268723	-200
0.364398	-0.321715	-200
0.292593	-0.409951	-200
0.275366	-0.407396	-200
0.271837	-0.348154	-200
0.222174	-0.34253	-200
0.21733	-0.316753	-200
0.216655	-0.279285	-200
0.218909	-0.253735	-200
0.213196	-0.212161	-200
0.190819	-0.331626	-200
0.195522	-0.373166	-200
0.162206	-0.354313	-200
0.159358	-0.332527	-200
0.0216478	0.00554654	-240
0.0385432	-0.0041772	-240
0.0017818	-0.0641387	-240
0.0248713	0.0635649	-240
0.068411	0.134631	-240
0.074149	0.229208	-240
0.0901119	0.135897	-240
0.0969053	0.0656251	-240
0.117428	0.0818153	-240
0.145822	0.100606	-240
0.172672	0.164274	-240
0.17036	0.271219	-240
0.198535	0.307132	-240
0.197151	0.339179	-240
0.179905	0.376727	-240
0.208134	0.329111	-240
0.205196	0.247562	-240
0.232523	0.272716	-240
0.283407	0.228564	-240
0.256961	0.132779	-240
0.259506	0.00657063	-240
0.218613	-0.0386521	-240
0.202539	-0.0160292	-240
0.136721	-0.0412873	-240
0.185441	-0.149809	-240
0.235005	-0.0869455	-240
0.299429	-0.188139	-240
0.314119	-0.178714	-240
0.329074	-0.190693	-240
0.36663	-0.194928	-240
0.286918	-0.293807	-240
0.208516	-0.339075	-240
0.191827	-0.346475	-240
0.177196	-0.360179	-240
0.158428	-0.359132	-240
0.152164	-0.331653	-240
0.176692	-0.319513	-240
0.263387	0.250956	-240
0.294518	0.128544	-240
0.0851109	-0.0978313	-240
0.089963	0.132882	-280
0.11195	0.123986	-280
0.0962251	0.174316	-280
0.118376	0.192462	-280
0.124638	0.233908	-280
0.199689	0.385891	-280
0.166898	0.0996649	-280
0.140614	0.0608221	-280
0.13737	0.0213774	-280
0.115837	-0.0612672	-280
0.169096	-0.0335315	-280
0.170337	0.00595266	-280
0.197112	0.125922	-280
0.207117	-0.0407662	-280
0.214752	-0.103381	-280
0.20442	-0.155123	-280
0.273555	0.0115782	-280
0.353161	-0.242216	-280
0.312243	-0.216181	-280
0.319652	-0.316238	-280
0.225374	-0.33458	-280
0.189168	-0.358588	-280
0.175434	-0.31039	-280
0.169638	-0.274871	-280
0.000727625	-0.106173	-320
0.0983139	-0.188046	-320
0.109078	-0.0671563	-320
0.134245	-0.00377507	-320
0.128235	0.0769711	-320
0.129408	0.121542	-320
0.119227	0.198103	-320
0.158734	0.182747	-320
0.206815	0.254344	-320
0.180181	0.396923	-320
0.242206	0.256033	-320
0.254507	0.192191	-320
0.256452	0.145458	-320
0.291059	0.236327	-320
0.3521	0.11243	-320
0.379004	0.0611547	-320
0.246534	-0.0391321	-320
0.226649	-0.0770994	-320
0.190317	-0.0469251	-320
0.194188	-0.14464	-320
0.269129	-0.141312	-320
0.293631	-0.302971	-320
0.251916	-0.332173	-320
0.234258	-0.321347	-320
0.231994	-0.382886	-320
0.168626	-0.343895	-320
0.06027	-0.0145595	-360
0.0465491	0.0204942	-360
0.0746763	-0.0233135	-360
0.0822005	-0.174532	-360
0.146473	-0.0764852	-360
0.168382	-0.0388271	-360
0.160272	0.0108002	-360
0.147454	0.0401354	-360
0.13434	0.0186639	-360
0.115494	0.136963	-360
0.130924	0.24671	-360
0.166667	0.134485	-360
0.199283	-0.0565247	-360
0.236699	-0.0653556	-360
0.242155	-0.0168848	-360
0.247251	0.137026	-360
0.324222	0.0420035	-360
0.340082	-0.0308738	-360
0.246446	-0.13207	-360
0.25589	-0.170517	-360
0.35964	-0.241476	-360
0.382085	-0.183158	-360
0.422994	-0.297708	-360
0.21666	-0.310235	-360
0.201612	-0.325888	-360
0.181291	-0.342977	-360
0.245289	-0.37479	-360
0.2831	-0.408129	-360
0.0337443	0.00667755	-400
0.00588257	-0.110767	-400
0.0500741	0.0148706	-400
0.0981066	0.0277316	-400
0.125301	-0.0552719	-400
0.146252	0.0250305	-400
0.10858	0.142798	-400
0.188412	-0.00116016	-400
0.204228	0.0809621	-400
0.195733	0.125499	-400
0.177724	0.212624	-400
0.21953	0.238961	-400
0.242327	0.19866	-400
0.246544	0.181253	-400
0.297026	0.135797	-400
0.307063	0.165229	-400
0.302508	0.0833976	-400
0.276912	0.0827633	-400
0.276275	0.0263055	-400
0.258277	-0.0364117	-400
0.240011	-0.0602056	-400
0.233188	-0.110975	-400
0.215296	-0.189255	-400
0.18923	-0.269684	-400
0.191806	-0.347456	-400
0.273803	-0.359054	-400
0.350905	-0.106111	-400
0.371592	-0.136728	-400
0.0931473	0.222745	-440
0.149293	0.138147	-440
0.167466	0.145413	-440
0.181896	0.131964	-440
0.214958	0.162652	-440
0.206644	0.242002	-440
0.218057	0.226319	-440
0.230486	0.210698	-440
0.192818	0.0814445	-440
0.180271	0.0376817	-440
0.198543	0.0388041	-440
0.174743	0.000498994	-440
0.127375	-0.0249317	-440
0.0964483	-0.196776	-440
0.132006	-0.196628	-440
0.164883	-0.153666	-440
0.208187	-0.128485	-440
0.222301	-0.121482	-440
0.263274	-0.143523	-440
0.267513	-0.0879848	-440
0.284212	-0.0501033	-440
0.328155	0.0672502	-440
0.348985	-0.302052	-440
0.218542	-0.342822	-440
0.200147	-0.335766	-440
0.205835	-0.308796	-440
0.0528947	-0.0289509	-480
0.103792	0.0772184	-480
0.12475	0.0695037	-480
0.143711	0.0984547	-480
0.148704	0.0810817	-480
0.159677	0.0289629	-480
0.169656	0.140927	-480
0.172652	0.175673	-480
0.205587	0.200773	-480
0.232531	-0.0501872	-480
0.264467	0.084945	-480
0.292416	-0.0598455	-480
0.255486	-0.14479	-480
0.244508	-0.111964	-480
0.211573	-0.0907281	-480
0.206586	-0.0559822	-480
0.174649	-0.10425	-480
0.190614	-0.175673	-480
0.264467	-0.189183	-480
0.26946	-0.227792	-480
0.22355	-0.310805	-480
0.209582	-0.312737	-480
0.115769	-0.287637	-480
0.242511	-0.362936	-480
0.275446	-0.39575	-480
0.294407	-0.411192	-480
0.0514524	0.00522989	-520
0.105456	0.120084	-520
0.0854522	0.236227	-520
0.11056	0.339306	-520
0.132719	0.0245316	-520
0.167636	0.086632	-520
0.176794	0.15894	-520
0.187729	0.139558	-520
0.204421	0.176888	-520
0.233368	0.334182	-520
0.233079	0.096588	-520
0.28213	0.0863924	-520
0.198463	0.0516653	-520
0.166304	-0.00350451	-520
0.170376	-0.0284216	-520
0.1724	-0.0772732	-520
0.209725	-0.0489717	-520
0.240293	-0.0775654	-520
0.26337	-0.218823	-520
0.221402	-0.233002	-520
0.19434	-0.240144	-520
0.146508	-0.210474	-520
0.182959	-0.332138	-520
0.353317	-0.31135	-520
0.102569	0.18275	-560
0.12032	0.302363	-560
0.152028	0.24279	-560
0.165572	0.241201	-560
0.182239	0.112564	-560
0.243936	0.203244	-560
0.21003	0.0226088	-560
0.189569	-0.0203982	-560
0.173966	-0.0208787	-560
0.214888	-0.0619954	-560
0.209848	-0.0823295	-560
0.240488	-0.0107535	-560
0.277296	0.196207	-560
0.305061	-0.0168415	-560
0.319474	-0.125369	-560
0.388623	-0.308887	-560
0.240439	-0.38609	-560
0.219994	-0.303985	-560
0.214376	-0.253717	-560
0.273584	-0.239779	-560
0.0998871	0.0558923	-600
0.124821	0.0593132	-600
0.151007	0.110418	-600
0.189	0.128392	-600
0.228119	0.159192	-600
0.254192	0.179126	-600
0.284832	0.266878	-600
0.227956	0.111509	-600
0.200701	0.0640683	-600
0.201451	-0.0331629	-600
0.235033	-0.0371556	-600
0.275216	-0.0118624	-600
0.285083	0.021056	-600
0.397766	0.0162903	-600
0.263997	-0.123658	-600
0.251076	-0.0996777	-600
0.219809	-0.369034	-600
0.317226	-0.404845	-600
0.171529	0.142829	-640
0.187378	0.0824587	-640
0.208391	0.0986748	-640
0.206649	0.0350834	-640
0.229354	0.217869	-640
0.243289	0.18563	-640
0.28607	0.0757875	-640
0.334446	0.0855938	-640
0.391701	-0.219382	-640
0.393558	-0.253124	-640
0.380047	-0.286434	-640
0.381955	-0.314564	-640
0.39909	-0.356252	-640
0.30197	-0.411423	-640
0.225748	-0.35301	-640
0.106442	0.000606299	-640
0.0223947	-0.279601	-640
0.0861461	0.0559033	-680
0.100007	0.139205	-680
0.137516	0.0750017	-680
0.148458	0.132983	-680
0.166183	0.100861	-680
0.187935	0.0832596	-680
0.175049	0.00719197	-680
0.163782	-0.00205632	-680
0.228212	-0.0873616	-680
0.258721	-0.0289907	-680
0.272847	0.0146054	-680
0.304945	-0.00999765	-680
0.176963	-0.279718	-680
0.313877	-0.267886	-680
0.312065	-0.30583	-680
0.338	-0.178963	-680
0.34707	-0.30331	-680
0.368539	-0.279402	-680
0.398705	-0.323906	-680
0.363935	-0.360711	-680
0.303049	-0.343911	-680
0.118222	0.211642	-720
0.117778	0.11682	-720
0.211454	0.298324	-720
0.203289	0.119031	-720
0.193378	0.055572	-720
0.146273	0.00799422	-720
0.220902	-0.0638189	-720
0.239408	-0.0570108	-720
0.240978	0.0230896	-720
0.259927	-0.0417287	-720
0.287504	-0.00310421	-720
0.32329	-0.124374	-720
0.365377	-0.0979934	-720
0.367254	-0.234891	-720
0.373653	-0.270545	-720
0.403412	-0.250813	-720
0.393423	-0.301641	-720
0.312649	-0.236304	-720
0.290976	-0.230548	-720
0.231217	-0.232093	-720
0.334074	-0.202049	-720
0.103776	0.213763	-760
0.132583	0.107036	-760
0.158081	0.0660587	-760
0.160247	-0.00760064	-760
0.0978206	-0.0841626	-760
0.169574	0.149018	-760
0.178704	0.130686	-760
0.188904	0.1143	-760
0.206885	0.0557928	-760
0.222157	0.0292306	-760
0.250276	0.0298816	-760
0.253188	0.0933643	-760
0.280169	0.00659525	-760
0.335426	0.0119254	-760
0.369744	-0.0712099	-760
0.324744	-0.168482	-760
0.311556	-0.142007	-760
0.279243	-0.144456	-760
0.261273	-0.165472	-760
0.30758	-0.207423	-760
0.366921	-0.208253	-760
0.392833	-0.217433	-760
0.352616	-0.267214	-760
0.306474	-0.372383	-760
0.244223	-0.355513	-760
0.221119	-0.290797	-760
0.19625	-0.361189	-760
0.115853	0.188221	-800
0.126076	0.102501	-800
0.115589	0.0581395	-800
0.143368	0.0496265	-800
0.165784	0.153966	-800
0.171186	0.0824932	-800
0.193705	0.190773	-800
0.161864	-0.0368693	-800
0.176924	-0.0560268	-800
0.185515	-0.0844341	-800
0.202771	-0.019025	-800
0.223514	-0.0190024	-800
0.237438	-0.0419912	-800
0.266278	0.0302066	-800
0.272538	-0.128076	-800
0.26334	-0.162702	-800
0.236669	-0.231153	-800
0.280394	-0.264826	-800
0.333426	-0.299372	-800
0.268477	-0.364244	-800
0.222448	-0.379638	-800
0.0610114	-0.0228737	-840
0.0876152	0.0365765	-840
0.0994639	0.027864	-840
0.0897347	0.158309	-840
0.142123	0.020825	-840
0.156225	0.00474776	-840
0.178781	0.0527532	-840
0.202863	0.134516	-840
0.245754	-0.00723261	-840
0.21129	-0.0427794	-840
0.185962	-0.0535111	-840
0.186749	-0.0983798	-840
0.221869	-0.10021	-840
0.243149	-0.100923	-840
0.209648	-0.130811	-840
0.292577	0.051447	-840
0.317476	-0.095017	-840
0.24221	-0.289952	-840
0.258473	-0.307781	-840
0.0527893	-0.009678	-880
0.0891206	0.0502361	-880
0.0876802	0.17854	-880
0.15756	0.14311	-880
0.16717	0.0889257	-880
0.262794	0.114629	-880
0.282981	0.114155	-880
0.297038	0.0649594	-880
0.314014	-0.101716	-880
0.243385	-0.168711	-880
0.20763	-0.296417	-880
0.0292411	0.0361733	-920
0.109298	0.142092	-920
0.128173	0.207856	-920
0.136772	0.0746321	-920
0.172252	-0.0117664	-920
0.208134	-0.0507065	-920
0.22318	-0.0239747	-920
0.220301	0.0211588	-920
0.216583	-0.0998271	-920
0.272585	-0.00822776	-920
0.2809	0.100081	-920
0.321957	0.00968267	-920
0.111021	0.188027	-960
0.13851	0.194522	-960
0.16921	0.0751655	-960
0.185446	0.0221737	-960
0.145802	-0.0175393	-960
0.201611	-0.0289414	-960
0.218437	-0.0348061	-960
0.315215	-0.173964	-960
0.333904	-0.266258	-960
0.276134	-0.326595	-960
0.242274	-0.341258	-960
0.240514	-0.386618	-960
0.256179	-0.358703	-960
0.226706	-0.243003	-960
0.100132	0.180169	-1000
0.121886	0.110049	-1000
0.171177	0.115668	-1000
0.2023	0.185924	-1000
0.23915	0.223479	-1000
0.226644	0.0768531	-1000
0.175839	0.0514388	-1000
0.179761	0.00676042	-1000
0.200977	0.0111387	-1000
0.213353	-0.0188448	-1000
0.23566	-0.0437765	-1000
0.310268	-0.143186	-1000
0.290597	-0.188594	-1000
0.211071	-0.168225	-1000
0.323754	-0.29274	-1000
0.337435	-0.267626	-1000
0.1555	0.0524574	-1040
0.241288	0.286189	-1040
0.224871	0.0744316	-1040
0.210688	0.019216	-1040
0.20867	-0.0113133	-1040
0.285285	-0.216796	-1040
0.113057	-0.281855	-1040
0.0748398	0.13561	-1080
0.104483	0.0784668	-1080
0.138767	0.241553	-1080
0.17931	0.170924	-1080
0.203332	-0.0263929	-1080
0.294768	-0.0291255	-1080
0.351303	-0.0409137	-1080
0.339552	-0.214463	-1080
0.123526	0.0367604	-1120
0.188275	-0.0223528	-1120
0.276207	-0.053943	-1120
0.346068	-0.0795804	-1120
0.348264	-0.105751	-1120
0.115576	0.0433316	-1160
0.155942	0.117787	-1160
0.152896	-0.0481171	-1160
0.178492	-0.0261139	-1160
0.292988	0.0556638	-1160
0.239014	-0.0854263	-1160
0.308246	-0.0881625	-1160
0.331298	-0.0964839	-1160
0.348274	-0.10678	-1160
0.136655	0.122927	-1200
0.176806	0.115645	-1200
0.218179	-0.00299106	-1200
0.297517	-0.0950588	-1200
0.105698	0.0476962	-1240
0.129822	0.0837475	-1240
0.179712	0.177317	-1240
0.179159	0.0225119	-1240
0.192857	0.0296829	-1240
0.319503	0.0136328	-1240
0.318726	-0.215644	-1240
0.299295	-0.263685	-1240
0.037401	-0.00373057	-1320
0.311996	-0.00642728	-1320
0.357441	-0.243602	-1320
0.145811	0.0604582	-1360
0.168433	-0.103218	-1360
0.2583	-0.261925	-1360
0.151537	-0.103196	-1400
0.246088	0.266956	-1400
0.239519	0.151519	-1400
0.253043	0.0553237	-1400
0.264543	-0.0298866	-1400
0.335562	-0.179917	-1400
0.338654	-0.29646	-1400
0.275974	-0.319495	-1400
0.251996	-0.278051	-1400
0.234772	-0.284724	-1400
0.181808	-0.341125	-1400
0.124008	0.112198	-1480
0.172552	0.0509268	-1480
0.371924	-0.00725591	-1480
0.331109	-0.251765	-1480
0.338325	-0.294124	-1480
0.283239	-0.266914	-1480
0.258564	-0.370986	-1480
0.236135	-0.346424	-1480
0.188601	-0.317351	-1480
0.135456	-0.0690842	-1520
0.253106	-0.13934	-1520
0.252877	-0.289026	-1520
0.23913	-0.353172	-1520
0.273834	-0.365641	-1520
0.318984	-0.282572	-1520
0.253396	0.359162	-1560
0.27102	-0.000151382	-1560
0.277557	-0.0991806	-1560
0.246498	-0.132548	-1560
0.196924	-0.10732	-1560
0.261291	-0.291988	-1560
0.349517	-0.178839	-1560
0.0824181	0.118646	-1600
0.106466	0.0580373	-1600
0.190338	-0.0853376	-1600
0.257405	0.011756	-1600
0.259114	-0.0273417	-1600
0.297776	-0.201989	-1600
0.2513	-0.283349	-1600
0.299038	-0.311661	-1600
0.198075	0.282865	-1640
0.283324	-0.18003	-1640
0.317405	-0.163725	-1640
0.303249	-0.30582	-1640
0.0300053	0.136852	-1680
0.288402	0.149	-1680
0.309251	0.00952232	-1680
0.33923	-0.189144	-1680
0.341784	-0.218705	-1680
0.33501	-0.237627	-1680
0.0210905	-0.0445964	-1720
0.230401	0.0795653	-1720
0.267886	-0.210728	-1720
0.335506	-0.244995	-1720
0.366914	-0.242108	-1720
0.0188523	0.186805	-1760
0.104878	0.0122056	-1760
0.213978	0.174665	-1760
0.224592	0.198217	-1760
0.19991	-0.0659864	-1760
0.232029	-0.097354	-1760
0.186085	0.113925	-1800
0.213223	-0.0719387	-1800
0.200902	-0.0960738	-1800
0.174502	-0.0683117	-1800
0.171939	-0.110366	-1800
0.0901969	-0.0731572	-1800
0.123078	0.162516	-1840
0.14441	0.0665597	-1840
0.136873	0.0365083	-1840
0.159366	0.0206058	-1840
0.154571	-0.016023	-1840
0.156193	-0.10048	-1840
0.181959	-0.0862014	-1840
0.224069	-0.0226849	-1840
0.27113	-0.0091226	-1840
0.0919668	-0.122139	-1840
0.0697254	-0.0889238	-1840
-0.151787	-0.00397605	1160
-0.0336	-0.207157	1160
-0.0831601	-0.311084	1160
-0.12561	0.215997	1120
-0.0309159	-0.147754	1120
-0.0841534	-0.234339	1120
-0.158982	-0.151115	1120
-0.184651	-0.313259	1120
-0.299558	-0.251679	1120
-0.0630079	-0.0914944	1080
-0.137442	-0.25351	1080
-0.312744	-0.112795	1080
-0.276261	0.0822986	1040
-0.293069	0.053496	1040
-0.298317	-0.00618289	1040
-0.347689	0.0205715	1040
-0.303571	-0.102883	1040
-0.175419	-0.185194	1040
-0.168067	-0.288064	1040
-0.117643	-0.283955	1040
-0.108194	-0.218106	1040
-0.226889	-0.308648	1040
-0.280524	-0.0178396	1000
-0.230928	-0.0139256	1000
-0.108596	0.0647378	1000
-0.115721	0.161514	1000
-0.106518	-0.176274	1000
-0.173446	-0.233779	1000
-0.232053	-0.282942	1000
-0.205039	0.154476	960
-0.103088	0.106266	960
-0.104722	0.059017	960
-0.109383	-0.0300795	960
-0.186903	-0.0133421	960
-0.19756	-0.129763	960
-0.189494	-0.196008	960
-0.178085	-0.225981	960
-0.0649728	-0.204652	960
-0.0551364	-0.187939	960
-0.227115	0.116521	920
-0.0101185	0.097474	920
-0.0877643	-0.0106861	920
-0.110178	-0.0280622	920
-0.0474001	-0.130019	920
-0.075415	-0.21886	920
-0.139115	-0.254335	920
-0.176862	-0.175004	920
-0.284535	-0.374318	920
-0.136374	0.158457	880
-0.132799	-0.113209	880
-0.11077	-0.153695	880
-0.0634009	-0.110426	880
-0.291986	-0.352186	880
-0.111299	0.166832	840
-0.157151	0.0840652	840
-0.0464663	-0.152909	840
-0.0895345	-0.190825	840
-0.126428	-0.313822	840
-0.0657885	0.0821216	760
-0.143996	0.299013	760
-0.210018	0.0834024	760
-0.131252	-0.0174704	760
-0.0988355	-0.0624215	760
-0.110383	-0.149928	760
-0.141394	-0.209313	760
-0.122112	-0.223925	760
-0.121851	-0.243246	760
-0.0500715	-0.218766	760
-0.2181	0.127314	720
-0.195614	0.121782	720
-0.202288	0.0670067	720
-0.172189	-0.00985863	720
-0.152805	-0.000638958	720
-0.0780395	0.0453103	720
-0.0762177	0.162348	720
-0.00693107	0.0599874	720
-0.0729447	-0.0762264	720
-0.111413	-0.0812177	720
-0.133407	-0.0469077	720
-0.136211	-0.0187087	720
-0.177298	-0.127486	720
-0.200951	-0.139386	720
-0.132127	-0.178696	720
-0.15531	-0.253645	720
-0.141334	-0.228186	720
-0.123873	-0.242262	720
-0.130063	-0.268248	720
-0.0918726	-0.240345	720
-0.0777407	-0.235895	720
-0.0626978	-0.246589	720
-0.0379202	-0.198143	720
-0.244137	-0.139484	720
-0.100269	0.0834052	720
-0.10414	0.147769	720
-0.227523	0.359178	680
-0.223278	0.286028	680
-0.0509814	0.22941	680
-0.0538374	0.0626856	680
-0.0637779	0.0185477	680
-0.335937	-0.0449736	680
-0.25783	0.0423159	680
-0.219884	-0.0191993	680
-0.246826	-0.131623	680
-0.240673	-0.335562	680
-0.138358	-0.165728	680
-0.161732	-0.232368	680
-0.158181	-0.257969	680
-0.148374	-0.277297	680
-0.133686	-0.268607	680
-0.104008	-0.271056	680
-0.115296	-0.295433	680
-0.0735969	-0.251652	680
-0.0854921	-0.234416	680
-0.0578624	-0.169542	680
-0.240409	0.317937	640
-0.14496	0.288365	640
-0.319167	0.198388	640
-0.102483	-0.0565534	640
-0.0783803	-0.131429	640
-0.0857061	-0.140149	640
-0.152393	-0.16113	640
-0.231288	-0.139731	640
-0.217351	-0.168031	640
-0.199083	-0.195872	640
-0.189743	-0.250477	640
-0.167585	-0.264007	640
-0.150198	-0.264137	640
-0.118111	-0.282567	640
-0.174511	-0.217088	640
-0.275909	0.306646	600
-0.177478	0.275259	600
-0.337894	0.0378955	600
-0.0590265	0.0241895	600
-0.0715667	-0.235374	600
-0.116877	-0.305323	600
-0.110886	-0.262597	600
-0.12565	-0.2642	600
-0.139913	-0.281043	600
-0.156704	-0.317296	600
-0.161028	-0.250821	600
-0.184262	-0.22083	600
-0.211262	-0.204639	600
-0.20715	-0.232877	600
-0.141498	-0.233407	600
-0.243754	-0.150786	600
-0.27395	0.328144	560
-0.188463	-0.0141606	560
-0.263844	-0.0876577	560
-0.231313	-0.224632	560
-0.220275	-0.291327	560
-0.178192	-0.222868	560
-0.152533	-0.293022	560
-0.133984	-0.27071	560
-0.144712	-0.237535	560
-0.114685	-0.216814	560
-0.0904942	-0.129238	560
-0.0578906	-0.161686	560
-0.0623864	-0.238746	560
-0.149567	0.075998	520
-0.168799	-0.109999	520
-0.100427	-0.160005	520
-0.145295	-0.185997	520
-0.147434	-0.216005	520
-0.178419	-0.272006	520
-0.224357	-0.224002	520
-0.14659	0.154089	480
-0.246304	-0.0501414	480
-0.140294	-0.0857767	480
-0.0967999	-0.250317	480
-0.0739067	-0.228336	480
-0.272804	0.231754	440
-0.240282	-0.243663	440
-0.100225	-0.173033	440
-0.0906916	-0.155264	440
-0.0861113	-0.0931028	440
-0.0670371	-0.218358	440
-0.146965	-0.145059	440
-0.00172108	0.0517846	400
-0.114999	-0.184467	400
-0.155035	-0.230496	400
-0.113555	-0.245793	400
-0.0745228	-0.234089	400
-0.128012	-0.0902223	360
-0.180526	-0.203003	360
-0.146607	-0.25	360
-0.110505	-0.25376	360
-0.284467	-0.394739	360
-0.0762548	-0.0373893	280
-0.0623066	-0.137688	280
-0.0958008	-0.164803	280
-0.0907651	-0.192691	280
-0.0943075	-0.259295	280
-0.152394	-0.0562589	280
-0.0810171	0.0522474	240
-0.27922	0.10072	240
-0.215314	-0.302018	240
-0.280963	0.137549	200
-0.123418	-0.0357366	200
-0.0899218	-0.110196	200
-0.101817	-0.207574	200
-0.114483	-0.213287	200
-0.0490435	-0.180839	200
-0.0816739	0.0377208	160
-0.0902869	-0.112012	160
-0.103287	-0.132471	160
-0.0934501	-0.205523	160
-0.0640157	-0.151201	160
-0.111597	-0.176744	160
-0.323917	-0.234162	160
-0.252749	0.23519	80
-0.168717	0.16456	80
-0.0309101	-0.135711	80
-0.109074	-0.210637	80
-0.142843	-0.14093	80
-0.127806	-0.290887	80
-0.164341	-0.329471	80
-0.226994	0.200744	40
-0.0777076	0.0795393	40
-0.0102237	-0.100384	40
-0.0337419	-0.109852	40
-0.0685075	-0.15909	40
-0.0807785	-0.270839	40
-0.138039	-0.272735	40
-0.153374	-0.316285	40
-0.169621	0.183471	0
-0.107743	0.115011	0
-0.117213	-0.183425	0
-0.100701	-0.282601	0
-0.0534159	-0.231411	0
-0.0778808	-0.264145	0
-0.157621	0.253278	-80
-0.144141	0.0787499	-80
-0.117219	-0.0974964	-80
-0.0608816	-0.182524	-80
-0.0656161	-0.252571	-80
-0.063782	-0.215508	-80
-0.103815	-0.259683	-80
-0.146267	-0.246318	-80
-0.222795	0.241244	-120
-0.0400445	-0.0642075	-120
-0.122178	-0.153701	-120
-0.108828	-0.256818	-120
-0.0626294	-0.237357	-120
-0.0995872	-0.309339	-120
-0.226927	0.163427	-160
-0.136094	0.14101	-160
-0.111562	-0.0238558	-160
-0.095523	-0.240836	-160
-0.116045	-0.253485	-160
-0.11616	-0.272167	-160
-0.15905	-0.26567	-160
-0.0037911	-0.117594	-160
-0.219463	0.145139	-200
-0.0290608	0.00639868	-200
-0.0628152	-0.241153	-200
-0.084644	-0.24069	-200
-0.0992993	-0.257692	-200
-0.122175	-0.259135	-200
-0.119623	-0.182216	-200
-0.0537482	-0.171235	-240
-0.0650838	-0.209929	-240
-0.0873104	-0.24313	-240
-0.13111	-0.0546732	-240
-0.00266022	-0.0981353	-280
-0.056463	-0.15319	-280
-0.0899025	-0.0729322	-280
-0.198479	0.184043	-320
-0.200031	0.00661812	-320
-0.111588	0.0786022	-320
-0.0241651	-0.193845	-320
-0.0939834	-0.211775	-320
-0.102084	-0.176192	-320
-0.126608	-0.142496	-320
-0.126719	-0.180067	-320
-0.107587	-0.301374	-320
-0.230751	-0.320738	-320
-0.0843307	0.149304	-360
-0.019488	0.00182149	-360
-0.0044747	-0.10613	-360
-0.111397	-0.127131	-360
-0.119096	0.0421264	-360
-0.0923505	-0.229654	-360
-0.118086	-0.285359	-360
-0.281199	-0.246876	-360
-0.126426	0.0486756	-400
-0.109694	0.119191	-400
-0.0696068	-0.121397	-400
-0.107833	-0.113827	-400
-0.110625	-0.226373	-400
-0.0660013	-0.243904	-400
-0.0715024	-0.187722	-400
-0.142247	-0.0137956	-440
-0.118066	-0.12525	-440
-0.084066	-0.0996676	-440
-0.149904	-0.246096	-440
-0.206431	0.270674	-480
-0.210583	0.227284	-480
-0.117219	-0.0537136	-480
-0.0632769	-0.192152	-480
-0.0943963	-0.237608	-480
-0.119294	-0.276863	-480
-0.0774103	-0.0126283	-520
-0.123238	-0.0779545	-520
-0.171899	-0.238202	-520
-0.150561	-0.271877	-520
-0.0790636	-0.199571	-520
-0.0623743	-0.20059	-520
-0.347848	0.306235	-560
-0.195002	-0.0951401	-560
-0.0877407	-0.133288	-560
-0.0688191	-0.237431	-560
-0.132441	0.124089	-600
-0.062625	-0.00182266	-600
-0.167352	-0.0510913	-600
-0.058523	-0.104017	-600
-0.0687843	-0.246355	-600
-0.145792	-0.222626	-600
-0.172486	-0.284676	-600
-0.226184	-0.0778998	-640
-0.173539	-0.0602219	-640
-0.0998538	-0.103343	-640
-0.0649106	-0.117324	-640
-0.128883	-0.240333	-640
-0.099537	-0.214598	-640
-0.0773335	-0.243368	-640
-0.127192	0.0670906	-680
-0.0540169	-0.172061	-680
-0.0711603	-0.216133	-680
-0.0936628	-0.249577	-680
-0.104412	-0.226518	-680
-0.132182	-0.256565	-680
-0.15951	-0.319122	-680
-0.281156	-0.352998	-680
-0.145729	-0.0516091	-720
-0.128194	-0.214471	-720
-0.0749865	-0.262293	-720
-0.00322922	0.134333	-760
-0.0646327	-0.119775	-760
-0.0931816	-0.235593	-760
-0.112661	-0.194997	-760
-0.134931	-0.214733	-760
-0.142386	-0.172806	-760
-0.20386	-0.205808	-760
-0.11267	-0.103776	-800
-0.10038	-0.166169	-800
-0.0912504	-0.198677	-800
-0.0985664	-0.243153	-800
-0.0960059	-0.259192	-800
-0.133814	-0.314091	-800
-0.152876	-0.311993	-800
-0.18529	-0.0723899	-840
-0.113574	0.0363463	-840
-0.110823	-0.192718	-840
-0.0967586	-0.164681	-840
-0.0979352	-0.238345	-840
-0.134436	-0.282224	-840
-0.163172	-0.20166	-840
-0.0311509	-0.146673	-840
-0.231367	-0.0983772	-880
-0.158606	-0.125941	-880
-0.106291	-0.140394	-880
-0.0848347	-0.186745	-880
-0.0920055	-0.202607	-880
-0.152103	-0.251835	-880
-0.0787016	-0.226526	-920
-0.179475	-0.135478	-920
-0.148633	-0.194828	-920
-0.165342	-0.219324	-920
-0.183178	-0.239954	-920
-0.104303	0.167394	-960
-0.031722	0.109789	-960
-0.0368119	0.0781022	-960
-0.0598768	0.0380914	-960
-0.114911	-0.0354292	-960
-0.154935	-0.10685	-960
-0.152784	-0.131726	-960
-0.149889	-0.148738	-960
-0.186463	-0.0512486	-960
-0.167927	-0.1803	-960
-0.149508	-0.231937	-960
-0.168438	-0.29266	-960
-0.155887	-0.333499	-960
-0.276238	-0.218691	-960
-0.248308	0.210969	-1000
-0.100858	0.155397	-1000
-0.0122337	-0.100556	-1000
-0.0691431	-0.215283	-1000
-0.0855223	-0.282444	-1000
-0.175548	-0.169735	-1000
-0.01795	-0.100753	-1040
-0.0694283	-0.16049	-1040
-0.119818	-0.224173	-1040
-0.172378	-0.281956	-1040
-0.193174	-0.187588	-1040
-0.0506277	-0.19438	-1080
-0.113999	-0.279478	-1080
-0.157883	-0.256662	-1080
-0.156303	-0.172993	-1120
-0.151211	-0.272082	-1120
-0.208669	-0.203472	-1120
-0.187797	-0.224234	-1160
-0.107795	0.0501417	-1200
-0.191586	-0.170707	-1200
-0.198645	-0.305674	-1200
-0.14377	-0.293632	-1240
-0.0586582	-0.163868	-1240
-0.192393	-0.235007	-1320
-0.106395	-0.185502	-1360
-0.137637	-0.291756	-1360
-0.157643	-0.23757	-1360
-0.233791	-0.36977	-1360
-0.176746	-0.320064	-1360
-0.128504	-0.238314	-1400
-0.142456	-0.293473	-1400
-0.177536	-0.315138	-1400
-0.240657	-0.359216	-1400
-0.303499	-0.274439	-1400
-0.221107	-0.192711	-1520
-0.17166	-0.270931	-1520
-0.166192	-0.202716	-1520
-0.114741	-0.16836	-1520
-0.102089	-0.345909	-1520
-0.310199	0.0343058	-1560
-0.226216	0.0665962	-1560
-0.292661	-0.0608988	-1560
-0.137585	-0.231689	-1560
-0.112476	-0.218898	-1560
-0.100851	0.173969	-1600
-0.140186	0.140605	-1600
-0.324327	-0.181141	-1600
-0.234985	-0.119284	-1600
-0.218992	-0.148896	-1600
-0.0863878	-0.215997	-1600
-0.0868066	-0.274701	-1600
-0.322677	-0.209771	-1640
-0.140321	-0.242844	-1640
-0.113119	-0.2183	-1640
-0.163287	-0.308977	-1640
-0.261738	-0.3681	-1640
-0.121172	-0.153842	-1680
-0.114799	-0.234809	-1680
-0.207912	-0.232786	-1680
-0.173473	-0.313766	-1680
-0.0773176	0.0896143	-1720
-0.11403	-0.161915	-1720
-0.156087	-0.140057	-1720
-0.174466	-0.305507	-1720
-0.202407	-0.310017	-1720
-0.302286	-0.267563	-1720
-0.339549	-0.24957	-1720
-0.393832	-0.234646	-1720
-0.0970052	0.222915	-1760
-0.179441	-0.0395261	-1760
-0.265679	-0.0140329	-1760
-0.0864208	-0.0215848	-1800
-0.162576	-0.269216	-1800
-0.0904174	0.129016	-1840
-0.167541	-0.254116	-1840
-0.217278	-0.238415	-1840

## Sheet: Sheet2
0.284581	-0.102168	-360
0.305712	-0.045445	-280
0.291062	-0.177783	-280
0.290785	-0.208133	-280
0.300475	-0.133626	-160
0.318268	-0.177725	-160
0.299456	-0.159035	-40
0.307781	-0.162306	0
0.322764	-0.190002	0
0.262627	-0.117155	80
0.283654	-0.0919526	80
0.312296	-0.103203	120
0.327798	-0.0866083	120
0.328107	-0.19335	120
0.295764	-0.126525	160
0.335315	-0.158885	160
0.319903	-0.19211	200
0.263976	-0.115242	240
