# Supplementary material for: Spinal premotor interneurons controlling antagonistic muscles are spatially intermingled
Source: eLife. 2022 Dec 13;11:e81976. doi: 10.7554/eLife.81976 (PMC9844990; doi:10.7554/eLife.81976)
Supplement: Figure 12—figure supplement 12—source data 1. — The x-y coordinates are normalized (between –0.5 and 0.5) and scaled to an idealized spinal cord of dimensions 1700 μm and 900 μm in the mediolateral and dorsoventral directions respectively, while z coordinates are in micron, with the axis origin taken at the border between L4 and L5 and negative values in the rostral direction. [file elife-81976-fig12-figsupp12-data1.xlsx]

## Sheet: Sheet1
0.110536	0.201884	-2000
0.109609	0.124585	-2000
0.215537	0.177891	-2000
0.236006	0.111166	-2000
0.246401	0.145709	-2000
0.251467	-0.016586	-2000
0.251228	-0.0723077	-2000
0.315488	0.039462	-2000
0.359882	-0.0517088	-2000
0.0515133	0.0309651	-1960
0.119722	0.0349084	-1960
0.131923	0.0816709	-1960
0.145108	-0.0137023	-1960
0.181945	-0.0498142	-1960
0.205234	0.0392371	-1960
0.19653	0.200534	-1960
0.257319	0.143444	-1960
0.249519	0.0183254	-1960
0.210722	-0.0827628	-1960
0.298115	0.102299	-1960
0.310835	0.126097	-1960
0.337653	0.143761	-1960
0.336977	-0.027942	-1960
0.299614	-0.156677	-1960
0.148333	0.342753	-1920
0.207325	0.33664	-1920
0.122349	-0.109422	-1920
0.26143	-0.109351	-1920
0.271007	-0.174342	-1920
0.28799	-0.179174	-1920
0.340112	-0.0125306	-1920
0.299549	0.0577335	-1920
0.22121	0.266625	-1880
0.198567	0.200248	-1880
0.170682	0.155246	-1880
0.211431	0.0271286	-1880
0.318181	0.041675	-1880
0.3226	-0.0692288	-1880
0.268231	-0.305206	-1880
0.193232	0.264705	-1840
0.268396	0.256944	-1840
0.207078	0.13831	-1840
0.162827	0.0833016	-1840
0.163876	0.0606688	-1840
0.192742	0.0674131	-1840
0.0814134	0.0416452	-1840
0.170542	-0.0665514	-1840
0.202564	-0.0342419	-1840
0.222811	-0.107786	-1840
0.296903	-0.0236564	-1840
0.291956	0.0496874	-1840
0.181351	0.376506	-1800
0.197631	0.257093	-1800
0.186627	0.19082	-1800
0.1934	0.148283	-1800
0.199928	0.116554	-1800
0.207975	0.102326	-1800
0.205995	0.0631141	-1800
0.217512	-0.0590229	-1800
0.0613913	0.0158526	-1800
0.255958	0.196766	-1800
0.307973	0.200685	-1800
0.305057	0.0768592	-1800
0.318123	0.0545638	-1800
0.408778	-0.151457	-1800
0.164244	0.331445	-1760
0.139463	0.218593	-1760
0.184705	0.168776	-1760
0.204994	0.185447	-1760
0.168285	0.114304	-1760
0.136459	0.00723335	-1760
0.0835401	0.145886	-1760
0.265584	-0.0420534	-1760
0.285817	0.18036	-1760
0.352404	-0.0623353	-1760
0.265745	-0.225145	-1760
0.21996	-0.29235	-1760
0.232855	-0.343531	-1760
0.160442	0.302309	-1720
0.131632	0.186417	-1720
0.199452	0.113962	-1720
0.22722	3.40623e-05	-1720
0.19715	-0.0340035	-1720
0.136538	-0.0436311	-1720
0.216763	-0.0600002	-1720
0.268685	-0.135794	-1720
0.25378	-0.250226	-1720
0.238366	-0.310091	-1720
0.274496	0.0724426	-1720
0.293988	0.032819	-1720
0.308902	0.0362046	-1720
0.350626	-0.0704109	-1720
0.02707	0.107279	-1680
0.0391263	-0.00182635	-1680
0.113918	0.216607	-1680
0.123987	0.146946	-1680
0.192386	0.181536	-1680
0.22732	0.168336	-1680
0.241756	0.0766694	-1680
0.228916	0.0720234	-1680
0.162787	0.00974207	-1680
0.216674	-0.0700528	-1680
0.231766	-0.0126315	-1680
0.214044	-0.138471	-1680
0.243355	-0.26299	-1680
0.31708	-0.170046	-1680
0.379601	-0.176102	-1680
0.38992	-0.194757	-1680
0.367417	-0.0316595	-1680
0.11139	0.224676	-1640
0.0986634	0.139853	-1640
0.121828	0.152038	-1640
0.142957	0.114522	-1640
0.100335	0.0279433	-1640
0.160081	0.01488	-1640
0.169592	-0.0411732	-1640
0.192749	-0.0352029	-1640
0.211283	0.059918	-1640
0.242204	0.0885961	-1640
0.221257	0.202795	-1640
0.283439	-0.00922924	-1640
0.31898	-0.0676162	-1640
0.256113	-0.151909	-1640
0.241378	-0.271932	-1640
0.125329	0.233703	-1600
0.177919	0.132573	-1600
0.195558	0.242677	-1600
0.233856	0.230668	-1600
0.291115	0.290329	-1600
0.24853	0.105088	-1600
0.203152	-0.0109281	-1600
0.338008	-0.0328942	-1600
0.325731	-0.058967	-1600
0.305953	-0.178533	-1600
0.414213	-0.256337	-1600
0.315529	-0.372825	-1600
0.198989	-0.376951	-1600
0.00441372	-0.059535	-1560
0.0951272	0.135679	-1560
0.116843	0.0538227	-1560
0.133701	0.102812	-1560
0.129966	0.122722	-1560
0.155421	0.153619	-1560
0.197194	0.290941	-1560
0.209834	0.294513	-1560
0.223064	0.246592	-1560
0.282818	0.321967	-1560
0.241737	0.147014	-1560
0.177171	-0.0549472	-1560
0.202831	0.0036623	-1560
0.254752	-0.0612964	-1560
0.312233	-0.162068	-1560
0.268177	-0.214182	-1560
0.254908	-0.302873	-1560
0.230701	-0.296185	-1560
0.20465	-0.275588	-1560
0.0465977	-0.0110542	-1520
0.0109898	-0.0670035	-1520
0.0616266	0.018562	-1520
0.0955831	0.101621	-1520
0.100141	0.157232	-1520
0.127675	0.091006	-1520
0.176507	0.130881	-1520
0.15868	0.114457	-1520
0.150633	0.205527	-1520
0.193915	0.248696	-1520
0.205378	0.163796	-1520
0.268994	0.135623	-1520
0.203899	0.062916	-1520
0.189381	-0.0077298	-1520
0.181182	-0.025016	-1520
0.210807	-0.0420631	-1520
0.232011	-0.303799	-1520
0.298823	-0.174699	-1520
0.368611	-0.11573	-1520
0.403218	-0.107493	-1520
0.0830157	0.0998883	-1480
0.0946002	0.199763	-1480
0.119694	0.119855	-1480
0.130313	0.0839041	-1480
0.142863	0.0859021	-1480
0.158302	0.147828	-1480
0.163129	0.0459416	-1480
0.176644	0.0898981	-1480
0.0666044	-0.00201109	-1480
0.195952	0.0139731	-1480
0.212357	0.0579297	-1480
0.194986	0.159816	-1480
0.204634	0.2637	-1480
0.230699	0.19578	-1480
0.254827	-0.0419586	-1480
0.288615	-0.117871	-1480
0.323362	-0.123865	-1480
0.381278	-0.173815	-1480
0.218149	-0.257719	-1480
0.197882	-0.245731	-1480
0.310812	-0.369596	-1480
0.315639	-0.333631	-1480
0.0817617	0.164773	-1440
0.0894722	0.0707065	-1440
0.0715361	-0.00867573	-1440
0.141971	-0.0329375	-1440
0.158909	0.0425766	-1440
0.154907	0.124788	-1440
0.233548	0.262333	-1440
0.221138	0.262822	-1440
0.225635	0.233339	-1440
0.23979	0.215212	-1440
0.235531	0.0669132	-1440
0.260088	-0.0629828	-1440
0.315836	-0.125727	-1440
0.252598	-0.351794	-1440
0.226113	-0.325354	-1440
0.0836438	0.0644086	-1400
0.0902227	0.132847	-1400
0.104321	0.167072	-1400
0.127821	0.0362273	-1400
0.140978	0.0422718	-1400
0.176689	0.00200166	-1400
0.16259	-0.0724679	-1400
0.20207	-0.0845436	-1400
0.217103	-0.148965	-1400
0.228385	-0.301947	-1400
0.291352	-0.0483163	-1400
0.31391	-0.0885733	-1400
0.343982	-0.11474	-1400
0.293233	0.0784992	-1400
0.311088	0.0845436	-1400
0.215227	0.150967	-1400
0.20207	0.148952	-1400
0.176689	0.193239	-1400
0.182327	0.229479	-1400
0.215227	0.269736	-1400
0.22932	0.0744827	-1400
0.174343	0.247816	-1320
0.231865	0.228819	-1320
0.226836	0.204204	-1320
0.186407	0.181841	-1320
0.237847	0.130632	-1320
0.268069	0.0941935	-1320
0.230148	0.0524928	-1320
0.189109	0.0512644	-1320
0.179064	0.0653236	-1320
0.164646	0.0988509	-1320
0.143226	0.100213	-1320
0.124568	0.0994804	-1320
0.108315	0.135031	-1320
0.222189	-0.0428886	-1320
0.254309	-0.138899	-1320
0.107015	0.112986	-1280
0.10506	0.0607811	-1280
0.113228	0.0362205	-1280
0.122622	0.0147001	-1280
0.150756	0.176632	-1280
0.176349	0.0838929	-1280
0.183589	0.0596184	-1280
0.192806	0.0670959	-1280
0.213838	0.0898007	-1280
0.22179	0.13512	-1280
0.226256	-0.0535044	-1280
0.286044	-0.0627337	-1280
0.267794	-0.106699	-1280
0.24459	-0.111729	-1280
0.202934	-0.101071	-1280
0.168465	-0.0431653	-1280
0.169707	-0.0605653	-1280
0.184283	-0.211318	-1280
0.197719	-0.291929	-1280
0.189294	-0.321779	-1280
0.207882	-0.31538	-1280
0.256128	-0.305855	-1280
0.282337	-0.226796	-1280
0.303579	-0.263745	-1280
0.313374	-0.218973	-1280
0.0656208	0.0422705	-1240
0.0713431	-0.0134015	-1240
0.123644	0.086188	-1240
0.173889	0.073436	-1240
0.189822	0.0291653	-1240
0.209974	-0.0626769	-1240
0.204225	-0.263676	-1240
0.216401	-0.324624	-1240
0.28917	-0.182774	-1240
0.287895	-0.133879	-1240
0.277525	-0.07525	-1240
0.277685	-0.0538969	-1240
0.32348	0.0315375	-1240
0.432725	-0.0833572	-1240
0.248327	0.137155	-1240
0.235789	0.172905	-1240
0.246261	0.207595	-1240
0.225029	0.352179	-1240
0.215609	0.410603	-1240
0.205776	0.241592	-1240
0.21772	0.231246	-1240
0.211658	0.207261	-1240
0.209194	0.178626	-1240
0.0263726	-0.000296137	-1200
0.0542104	0.108804	-1200
0.0727317	0.124561	-1200
0.0953591	0.148977	-1200
0.0945124	0.223432	-1200
0.0678837	0.024953	-1200
0.0832958	-0.0145606	-1200
0.114131	-0.0211203	-1200
0.15869	0.130033	-1200
0.151926	0.173799	-1200
0.179657	0.13612	-1200
0.210576	0.179721	-1200
0.215296	0.348092	-1200
0.210337	0.389726	-1200
0.267383	0.306699	-1200
0.208253	0.0723003	-1200
0.198151	0.00694259	-1200
0.225604	0.0101955	-1200
0.208219	-0.072633	-1200
0.225225	-0.0715127	-1200
0.283391	0.0181069	-1200
0.252081	-0.155506	-1200
0.232178	-0.23051	-1200
0.221145	-0.271574	-1200
0.273293	-0.359424	-1200
0.283017	-0.399927	-1200
0.0622383	0.00174502	-1160
0.0691152	0.0240234	-1160
0.127361	0.14145	-1160
0.138793	0.246656	-1160
0.212526	0.28614	-1160
0.217138	0.301591	-1160
0.261197	0.297978	-1160
0.208879	0.254077	-1160
0.234467	0.188643	-1160
0.245797	0.206356	-1160
0.273506	0.162368	-1160
0.210078	0.138984	-1160
0.159361	-0.0128093	-1160
0.20488	-0.0240185	-1160
0.279734	-0.0667962	-1160
0.301822	-0.0932231	-1160
0.254095	-0.156307	-1160
0.310388	0.0453769	-1160
0.260998	-0.321805	-1160
0.283838	-0.403074	-1160
0.184895	-0.318867	-1160
0.00859212	-0.0491761	-1160
0.0659395	-0.00971635	-1120
0.0951359	0.0840281	-1120
0.119487	0.0767316	-1120
0.127591	0.0903345	-1120
0.0986732	0.200047	-1120
0.114193	0.184799	-1120
0.151442	0.168222	-1120
0.148706	0.146423	-1120
0.180041	0.099263	-1120
0.182509	0.0896467	-1120
0.22524	0.11664	-1120
0.246035	0.115436	-1120
0.259294	0.115331	-1120
0.242213	0.188136	-1120
0.24335	0.217563	-1120
0.216139	0.175333	-1120
0.30474	-0.105952	-1120
0.285775	-0.130904	-1120
0.189302	-0.175876	-1120
0.246637	-0.310117	-1120
0.258942	-0.384067	-1120
0.0873914	0.285656	-1080
0.164536	0.29022	-1080
0.165161	0.257632	-1080
0.198834	0.239048	-1080
0.177343	0.15565	-1080
0.185523	0.1266	-1080
0.179718	0.109601	-1080
0.185061	0.0787504	-1080
0.19326	0.0516026	-1080
0.199417	0.104981	-1080
0.205334	0.133464	-1080
0.238455	0.155112	-1080
0.282998	0.0939682	-1080
0.395501	-0.134607	-1080
0.350754	-0.0945048	-1080
0.288795	-0.0843598	-1080
0.286008	-0.178083	-1080
0.188074	-0.0956365	-1080
0.175875	-0.0932323	-1080
0.18275	-0.0628724	-1080
0.103354	-0.00797637	-1080
0.0950256	0.00576096	-1080
0.0445237	0.128254	-1040
0.0528713	0.149583	-1040
0.0854487	0.117045	-1040
0.0973755	0.234298	-1040
0.112439	-0.00226623	-1040
0.135077	0.0336997	-1040
0.152314	0.310423	-1040
0.163658	0.344977	-1040
0.199803	0.364836	-1040
0.237531	0.251319	-1040
0.231377	0.266382	-1040
0.220295	0.256586	-1040
0.208533	0.238785	-1040
0.223532	0.207527	-1040
0.238192	0.172252	-1040
0.293592	0.221223	-1040
0.205423	0.159251	-1040
0.289525	0.0653839	-1040
0.21278	0.0171962	-1040
0.206612	-0.0112686	-1040
0.195359	-0.0230652	-1040
0.227448	-0.115517	-1040
0.2852	-0.0716956	-1040
0.289201	-0.133536	-1040
0.221716	-0.258218	-1040
0.224489	-0.280136	-1040
0.258969	-0.388121	-1040
0.197591	-0.279048	-1040
0.0934337	0.136682	-1000
0.0919867	0.0821891	-1000
0.105886	0.0741161	-1000
0.100596	0.0618139	-1000
0.0869798	0.0547427	-1000
0.0723288	0.00254158	-1000
0.135148	0.00484674	-1000
0.124028	-0.0536154	-1000
0.128078	0.124996	-1000
0.143415	0.128007	-1000
0.193166	0.157122	-1000
0.196369	0.186768	-1000
0.213591	0.18944	-1000
0.230292	0.245059	-1000
0.22695	0.147485	-1000
0.245645	0.140454	-1000
0.206973	0.103756	-1000
0.198024	0.0732196	-1000
0.205773	0.0548806	-1000
0.212491	0.0348459	-1000
0.180535	-0.0218994	-1000
0.315664	0.0471414	-1000
0.225632	-0.271344	-1000
0.23288	-0.300918	-1000
0.245105	-0.282272	-1000
0.314237	-0.309377	-1000
0.199013	-0.293153	-1000
0.0563645	0.00575876	-960
0.0570851	0.105315	-960
0.0658516	0.148984	-960
0.0812268	0.127159	-960
0.0959806	0.145386	-960
0.102985	0.121682	-960
0.132183	0.0145941	-960
0.113264	0.210859	-960
0.188582	0.0382984	-960
0.190264	0.0697962	-960
0.204483	0.163961	-960
0.222512	0.157429	-960
0.246759	0.181241	-960
0.256191	0.25467	-960
0.2748	0.190142	-960
0.239659	0.117205	-960
0.233981	0.0109092	-960
0.254518	-0.137881	-960
0.237216	-0.169433	-960
0.235048	-0.192822	-960
0.258949	-0.278629	-960
0.198224	-0.297258	-960
0.408694	-0.296378	-960
0.0435098	0.0185007	-920
0.0561136	0.0566955	-920
0.0606605	0.141908	-920
0.0874334	0.0959291	-920
0.0849237	0.0451043	-920
0.11439	0.0628192	-920
0.110837	0.0972519	-920
0.117524	0.120827	-920
0.122887	0.161459	-920
0.131099	0.191912	-920
0.216176	0.314475	-920
0.168053	0.101888	-920
0.189557	0.135215	-920
0.195494	0.160889	-920
0.206332	0.14615	-920
0.20673	0.118333	-920
0.226092	0.13762	-920
0.226882	0.157666	-920
0.245781	0.171573	-920
0.25141	0.19366	-920
0.239998	0.223357	-920
0.274437	0.158188	-920
0.300879	0.173235	-920
0.281455	0.120738	-920
0.285451	0.0806311	-920
0.198343	0.0750331	-920
0.157437	0.00027474	-920
0.17649	-0.211056	-920
0.302298	-0.102259	-920
0.307419	-0.032005	-920
0.351591	-0.0598658	-920
0.370441	-0.0680876	-920
0.25488	-0.339087	-920
0.0595342	-0.0141772	-880
0.0841892	0.132631	-880
0.114314	0.0712255	-880
0.127604	0.0625875	-880
0.158794	0.0463372	-880
0.162226	0.0831098	-880
0.188259	0.0323991	-880
0.186235	0.0485954	-880
0.201819	-0.0117995	-880
0.215015	0.0190289	-880
0.221776	-0.0139202	-880
0.198597	0.164402	-880
0.21594	0.123371	-880
0.222858	0.135763	-880
0.235532	0.196277	-880
0.245132	0.186425	-880
0.259581	0.183462	-880
0.250275	0.0749127	-880
0.275546	0.152568	-880
0.271656	0.042921	-880
0.332226	0.010779	-880
0.267789	-0.14958	-880
0.322119	-0.178472	-880
0.368413	-0.245163	-880
0.387862	-0.259019	-880
0.400326	-0.224098	-880
0.395324	-0.171786	-880
0.344947	-0.323188	-880
0.358974	-0.335933	-880
0.275952	-0.31694	-880
0.270886	-0.349422	-880
0.221887	-0.323607	-880
0.151382	-0.289428	-880
0.0991443	-0.191927	-880
0.00420579	0.081478	-840
0.0026857	-0.120935	-840
0.067456	0.0338064	-840
0.0797951	0.0902543	-840
0.0896599	0.117886	-840
0.104601	0.117585	-840
0.0611358	0.177749	-840
0.0776866	0.185279	-840
0.0855664	0.211664	-840
0.135616	0.206258	-840
0.137818	0.177479	-840
0.130509	0.125185	-840
0.105602	0.0423072	-840
0.14675	0.0964962	-840
0.153435	0.0763809	-840
0.16001	0.0114295	-840
0.183939	0.0177808	-840
0.183686	0.0691965	-840
0.19714	0.105909	-840
0.188016	0.195532	-840
0.190522	0.333368	-840
0.191336	0.266728	-840
0.234948	0.230011	-840
0.243982	0.204576	-840
0.254215	0.0952189	-840
0.227982	0.0621133	-840
0.256254	0.0536799	-840
0.25559	-0.11705	-840
0.230948	-0.00121525	-840
0.246919	-0.0981949	-840
0.292912	-0.0312127	-840
0.356673	0.068389	-840
0.387547	0.00320662	-840
0.4227	-0.164393	-840
0.364631	-0.219529	-840
0.295762	-0.400218	-840
0.2741	-0.358411	-840
0.271518	-0.442772	-840
0.0618572	0.0261051	-800
0.062482	0.0986672	-800
0.0601017	0.125444	-800
0.0699977	0.142424	-800
0.105521	0.0214733	-800
0.111393	-0.0518569	-800
0.154551	0.046566	-800
0.157745	0.0836828	-800
0.181515	0.109424	-800
0.181844	0.134984	-800
0.170778	0.180665	-800
0.188932	0.228208	-800
0.193232	0.245551	-800
0.211432	0.260937	-800
0.179241	0.322545	-800
0.205231	0.308708	-800
0.225811	0.297316	-800
0.244261	0.391863	-800
0.255609	0.273212	-800
0.259014	0.290958	-800
0.22124	0.211529	-800
0.231906	0.193888	-800
0.206861	0.17515	-800
0.228755	0.1246	-800
0.226125	0.0722301	-800
0.195085	0.0818943	-800
0.241556	0.00101857	-800
0.297864	0.110667	-800
0.304815	0.169677	-800
0.3426	-0.022981	-800
0.327779	-0.129866	-800
0.31029	-0.137002	-800
0.293807	-0.0888859	-800
0.293556	-0.168046	-800
0.415464	-0.015034	-800
0.371068	-0.127913	-800
0.370753	-0.164186	-800
0.346432	-0.185389	-800
0.275613	-0.234961	-800
0.25577	-0.236747	-800
0.236921	-0.172568	-800
0.220252	-0.246485	-800
0.258729	-0.289491	-800
0.233297	-0.290917	-800
0.253377	-0.329929	-800
0.282799	-0.347449	-800
0.304785	-0.331627	-800
0.0179049	0.114431	-800
0.108493	0.0886886	-800
0.522371	-0.101666	-800
0.354438	-0.495345	-800
0.017462	-0.34812	-800
0.185042	0.694846	-800
0.0122367	0.0377066	-800
0.00294087	-0.0612108	-760
0.012682	-0.0325066	-760
0.0527602	0.0858786	-760
0.0709549	0.16894	-760
0.0972303	0.185573	-760
0.100043	0.219955	-760
0.0938894	0.272247	-760
0.108599	0.0968451	-760
0.114966	0.0484051	-760
0.13156	0.102638	-760
0.152861	0.192699	-760
0.168959	0.0423001	-760
0.178603	0.02031	-760
0.193206	0.0224024	-760
0.188189	-0.067959	-760
0.190618	0.122523	-760
0.194572	0.144904	-760
0.203363	0.107546	-760
0.213109	0.136237	-760
0.176041	0.153583	-760
0.232088	0.217149	-760
0.234331	0.257531	-760
0.229244	0.329042	-760
0.274125	0.175123	-760
0.252504	0.0792909	-760
0.255044	0.0435302	-760
0.243665	0.00160737	-760
0.230653	-0.102295	-760
0.254542	-0.112354	-760
0.280508	-0.150241	-760
0.255695	-0.173104	-760
0.240312	-0.221796	-760
0.23814	-0.244637	-760
0.218819	-0.233807	-760
0.216743	-0.205966	-760
0.257632	-0.236003	-760
0.251435	-0.298767	-760
0.255438	-0.340745	-760
0.265863	-0.316123	-760
0.291754	-0.322791	-760
0.301735	-0.257108	-760
0.279515	-0.200692	-760
0.0356147	0.0666873	-720
0.0333914	0.131973	-720
0.0432472	0.156588	-720
0.0704231	0.161903	-720
0.107455	0.191845	-720
0.122958	0.223567	-720
0.13798	0.164121	-720
0.0805926	-0.0365859	-720
0.0833676	-0.0086926	-720
0.0891717	0.028809	-720
0.092769	0.0545328	-720
0.110582	0.0493518	-720
0.122509	0.0817072	-720
0.105178	-0.00241337	-720
0.109889	-0.0478632	-720
0.136281	0.0123506	-720
0.14698	0.0611401	-720
0.140392	0.0785374	-720
0.175552	0.183822	-720
0.181724	0.154343	-720
0.18715	0.0519963	-720
0.187339	0.0316857	-720
0.178917	-0.00331483	-720
0.198731	-0.00277942	-720
0.211481	0.0274066	-720
0.229131	-0.00816786	-720
0.217561	-0.0304416	-720
0.222359	0.132948	-720
0.223154	0.181469	-720
0.235482	0.199561	-720
0.251385	0.21702	-720
0.243417	0.143408	-720
0.250833	0.12384	-720
0.303032	0.201781	-720
0.309086	0.0141667	-720
0.282196	-0.0601515	-720
0.289942	-0.0959942	-720
0.289028	-0.122194	-720
0.258168	-0.181616	-720
0.228893	-0.143981	-720
0.215115	-0.0746229	-720
0.184412	-0.10365	-720
0.152665	-0.239963	-720
0.231143	-0.259957	-720
0.248042	-0.291338	-720
0.270085	-0.252667	-720
0.265363	-0.310624	-720
0.266444	-0.331093	-720
0.23962	-0.326338	-720
0.291624	-0.331509	-720
0.351462	0.0167874	-720
0.332642	-0.0325999	-720
0.374629	-0.273222	-720
0.32157	-0.11783	-720
0.0214677	-0.00461443	-680
0.0505239	-0.190655	-680
0.0798973	0.0590826	-680
0.0964565	0.0723566	-680
0.110327	0.0859807	-680
0.0952977	0.128182	-680
0.0958262	0.212595	-680
0.163962	0.269316	-680
0.139651	0.137979	-680
0.138121	0.0824912	-680
0.148987	0.0849652	-680
0.12657	0.0551419	-680
0.131003	0.0200284	-680
0.154468	-0.00979801	-680
0.168919	-0.00777402	-680
0.17145	0.0514263	-680
0.172768	0.0666264	-680
0.182844	0.105676	-680
0.188536	0.0512002	-680
0.196766	0.0559244	-680
0.215276	0.0420857	-680
0.216119	0.00742293	-680
0.208316	-0.0146396	-680
0.199717	-0.065389	-680
0.213375	0.201675	-680
0.225137	0.236674	-680
0.229881	0.213037	-680
0.22735	0.186474	-680
0.22735	0.153836	-680
0.294697	-0.0139575	-680
0.236788	-0.0911664	-680
0.267745	-0.110406	-680
0.229671	-0.153629	-680
0.201612	-0.224978	-680
0.224292	-0.250867	-680
0.239322	-0.260431	-680
0.255144	-0.208656	-680
0.393049	-0.133827	-680
0.388093	-0.150477	-680
0.382559	-0.0902641	-680
0.28241	-0.263921	-680
0.215217	-0.351479	-680
0.27845	-0.309496	-680
0.296489	-0.405836	-680
0.308563	-0.326723	-680
0.34195	-0.388501	-680
0.00696047	-0.0904171	-640
0.057594	0.0890286	-640
0.0669193	0.173785	-640
0.0780398	0.225727	-640
0.100006	0.209133	-640
0.0889923	0.153312	-640
0.106955	0.151748	-640
0.104923	0.0951322	-640
0.0805052	0.070616	-640
0.141907	0.0863078	-640
0.143265	0.102017	-640
0.170672	0.148298	-640
0.19568	0.151524	-640
0.213349	0.258724	-640
0.219301	0.20509	-640
0.225082	0.190289	-640
0.236828	0.252038	-640
0.247079	0.237813	-640
0.269867	0.256299	-640
0.237275	0.170494	-640
0.285125	0.190259	-640
0.189915	0.10026	-640
0.183271	0.0158614	-640
0.179301	-0.0681919	-640
0.186127	-0.0556578	-640
0.198724	-0.0248928	-640
0.217017	-0.0711014	-640
0.231827	-0.0555975	-640
0.251386	0.0479658	-640
0.258	0.0682458	-640
0.266781	0.0421777	-640
0.287503	0.136165	-640
0.309411	0.121503	-640
0.274681	-0.0170375	-640
0.254568	-0.035178	-640
0.27723	-0.109964	-640
0.210767	-0.235122	-640
0.225051	-0.23328	-640
0.240127	-0.227443	-640
0.247649	-0.273101	-640
0.273974	-0.285252	-640
0.260385	-0.345299	-640
0.261352	-0.413169	-640
0.343901	-0.318982	-640
0.346163	-0.336177	-640
0.361098	-0.227389	-640
0.357604	-0.132632	-640
0.00379485	0.066888	-560
0.0470411	-0.0868174	-560
0.0602814	0.0949336	-560
0.0621354	0.13763	-560
0.077584	0.103266	-560
0.103794	0.0705385	-560
0.104063	0.240908	-560
0.118186	0.237654	-560
0.126568	0.163859	-560
0.136013	0.0733839	-560
0.133894	0.0245952	-560
0.162134	0.0180891	-560
0.167519	0.0599588	-560
0.182258	0.0298739	-560
0.184821	0.0477688	-560
0.202474	0.0231652	-560
0.216681	0.0424796	-560
0.229746	0.0558906	-560
0.204411	-0.034775	-560
0.203616	-0.0530774	-560
0.189939	-0.0601946	-560
0.205559	-0.0904827	-560
0.142282	0.340924	-560
0.173439	0.380972	-560
0.215008	0.373459	-560
0.233452	0.408219	-560
0.232041	0.293556	-560
0.239985	0.271189	-560
0.214127	0.291516	-560
0.215447	0.239885	-560
0.223039	0.229918	-560
0.20627	0.213245	-560
0.193737	0.253103	-560
0.191441	0.179704	-560
0.174673	0.183567	-560
0.216772	0.106106	-560
0.278286	-0.0374249	-560
0.272729	-0.0833706	-560
0.310147	-0.0221779	-560
0.306352	-0.089066	-560
0.330364	-0.0288867	-560
0.263458	-0.3379	-560
0.314296	-0.316757	-560
0.325595	-0.364535	-560
0.343426	-0.0770709	-560
0.348893	-0.0536921	-560
0.381817	-0.0551111	-560
0.0563147	0.000254343	-520
0.0825127	0.126522	-520
0.0902598	0.117516	-520
0.0984985	0.225196	-520
0.119982	0.153308	-520
0.133883	0.0986176	-520
0.155269	0.157809	-520
0.166517	0.19349	-520
0.190173	0.234021	-520
0.22095	0.232845	-520
0.241541	0.25117	-520
0.230657	0.188821	-520
0.200605	0.181739	-520
0.198016	0.139003	-520
0.184185	0.0605844	-520
0.187061	0.0275161	-520
0.193212	0.0268721	-520
0.204981	0.0440758	-520
0.212894	-0.0018059	-520
0.187684	-0.0769873	-520
0.257858	0.0938209	-520
0.281506	0.179406	-520
0.29227	0.0533603	-520
0.323997	-0.12607	-520
0.339011	-0.168604	-520
0.351189	-0.176016	-520
0.241737	-0.330439	-520
0.203456	-0.307996	-520
0.242755	-0.414503	-520
0.272452	-0.425807	-520
0.290525	-0.401068	-520
0.324131	-0.3923	-520
0.37532	-0.110962	-520
0.378067	-0.0600596	-520
0.361853	-0.216035	-520
0.362484	-0.183348	-520
0.00405554	0.0502396	-480
0.00447138	-0.0952067	-480
0.0308349	0.136317	-480
0.0993676	-0.000530261	-480
0.124905	0.0487552	-480
0.119993	0.0974451	-480
0.119682	0.159516	-480
0.107411	0.187206	-480
0.127162	0.287156	-480
0.161233	0.198388	-480
0.143916	0.0711726	-480
0.161667	0.0548763	-480
0.164915	0.0198202	-480
0.20862	0.0023711	-480
0.21448	0.0544659	-480
0.225148	0.0462381	-480
0.205776	0.175083	-480
0.217685	0.203635	-480
0.2394	0.22788	-480
0.244929	0.15007	-480
0.277458	0.181588	-480
0.258918	0.114549	-480
0.300372	0.0487155	-480
0.255627	-0.0443179	-480
0.233797	-0.0801827	-480
0.231699	-0.113053	-480
0.194686	-0.334415	-480
0.209953	-0.329274	-480
0.246862	-0.307652	-480
0.250153	-0.338814	-480
0.295387	-0.383489	-480
0.305559	-0.349041	-480
0.350744	-0.304499	-480
0.385432	-0.139286	-480
0.034199	-0.00236885	-440
0.0541546	0.0764279	-440
0.0606038	0.0599711	-440
0.0924657	0.0185119	-440
0.101952	-0.0349808	-440
0.121492	-0.00820185	-440
0.0782596	0.192533	-440
0.0980575	0.191461	-440
0.114182	0.101087	-440
0.120803	0.0660586	-440
0.135136	0.0721997	-440
0.149347	0.0913393	-440
0.138955	0.0482101	-440
0.15038	-0.0200635	-440
0.166619	0.0715898	-440
0.181467	0.0220294	-440
0.19001	-0.025926	-440
0.189405	-0.0575192	-440
0.201764	-0.0328903	-440
0.209472	-0.0883075	-440
0.226609	0.0033813	-440
0.223589	0.0385516	-440
0.218677	0.0829301	-440
0.211976	0.12725	-440
0.220048	0.129423	-440
0.204365	0.171522	-440
0.180108	0.168697	-440
0.16331	0.234904	-440
0.206186	0.266314	-440
0.239765	0.330791	-440
0.27818	0.26173	-440
0.235384	0.221029	-440
0.224647	0.215042	-440
0.225929	0.174228	-440
0.248059	0.212247	-440
0.248282	0.188115	-440
0.256372	0.188435	-440
0.261284	0.144056	-440
0.294545	0.145371	-440
0.244907	0.0672551	-440
0.300283	0.0118676	-440
0.337553	-0.031232	-440
0.337794	-0.0572292	-440
0.296762	-0.190715	-440
0.277902	-0.193326	-440
0.249128	-0.194463	-440
0.253613	-0.0958459	-440
0.244207	-0.051645	-440
0.248245	-0.292926	-440
0.249469	-0.328168	-440
0.267051	-0.381341	-440
0.423392	-0.170852	-440
0.416312	-0.280722	-440
0.222497	-0.329234	-440
0.343429	-0.179587	-440
0.0601323	0.0481934	-400
0.0987975	0.089282	-400
0.0945308	0.116209	-400
0.0835009	0.215262	-400
0.132315	0.177985	-400
0.146111	0.0988976	-400
0.144345	0.0805894	-400
0.124354	0.0657594	-400
0.127712	0.0390176	-400
0.115493	0.0133877	-400
0.133112	-0.00303737	-400
0.150421	-0.00634093	-400
0.148708	-0.0432923	-400
0.143232	-0.101917	-400
0.171898	-0.0980712	-400
0.191754	-0.00676144	-400
0.20213	0.0583715	-400
0.186072	0.0689039	-400
0.187357	0.0966204	-400
0.183072	0.162703	-400
0.183105	0.183203	-400
0.189061	0.232407	-400
0.175394	0.235015	-400
0.225455	0.303776	-400
0.217323	0.187862	-400
0.220819	0.144309	-400
0.252423	0.171834	-400
0.251224	0.145962	-400
0.243924	0.0876977	-400
0.252776	0.0804134	-400
0.278794	0.0866254	-400
0.232655	-0.0760979	-400
0.200691	-0.230349	-400
0.2167	-0.321036	-400
0.219553	-0.299201	-400
0.280036	-0.183962	-400
0.356717	-0.254532	-400
0.311257	-0.402474	-400
0.173002	-0.351848	-400
0.360386	-0.0762353	-400
0.358971	-0.0274974	-400
0.350616	-0.128446	-400
0.0530182	0.0134271	-320
0.0611777	0.14207	-320
0.0777422	0.172826	-320
0.0784028	0.217707	-320
0.107533	0.189628	-320
0.113368	0.221074	-320
0.089482	0.0578853	-320
0.102277	0.0757814	-320
0.110136	0.0621733	-320
0.11886	0.046629	-320
0.109861	0.0434715	-320
0.0846943	-0.0241819	-320
0.108302	-0.00136454	-320
0.130845	0.0701942	-320
0.129522	0.102101	-320
0.140229	0.0995439	-320
0.138741	0.120227	-320
0.157415	0.233211	-320
0.18299	0.207228	-320
0.174902	0.144105	-320
0.173486	0.108638	-320
0.156338	0.0386002	-320
0.150833	0.0296008	-320
0.154085	0.00692335	-320
0.168143	-0.0108203	-320
0.154621	-0.139118	-320
0.193627	0.139164	-320
0.212964	0.175358	-320
0.226349	0.172616	-320
0.239575	0.158663	-320
0.2385	0.207405	-320
0.239778	0.233527	-320
0.256018	0.241848	-320
0.231029	0.125523	-320
0.21504	-0.109316	-320
0.246632	-0.030854	-320
0.259192	-0.0896889	-320
0.26657	-0.075193	-320
0.35122	-0.0413332	-320
0.368655	-0.0125017	-320
0.260419	-0.310652	-320
0.228483	-0.229983	-320
0.203096	-0.312581	-320
0.23734	-0.35784	-320
0.308616	-0.0161234	-320
0.331006	-0.0156959	-320
0.329783	-0.0380732	-320
0.322129	-0.071283	-320
0.317176	-0.164561	-320
0.343033	-0.17183	-320
0.283271	-0.278433	-320
0.284523	-0.375859	-320
0.175632	-0.353869	-320
0.416686	-0.33756	-320
0.0412895	0.00090677	-280
0.0822744	0.203035	-280
0.118095	0.206143	-280
0.117179	0.15133	-280
0.115008	0.131353	-280
0.111158	0.0657672	-280
0.115316	0.0398797	-280
0.11965	0.02496	-280
0.137424	0.0457255	-280
0.150863	0.0814227	-280
0.160723	0.122836	-280
0.218445	0.118998	-280
0.225188	0.138659	-280
0.235937	0.123313	-280
0.231937	0.103458	-280
0.263179	0.10687	-280
0.283824	0.134761	-280
0.266569	0.309672	-280
0.24855	0.0548067	-280
0.227666	0.0122887	-280
0.212086	-0.0415377	-280
0.168085	0.014424	-280
0.165242	-0.045739	-280
0.139376	-0.111699	-280
0.154954	-0.112735	-280
0.180849	-0.0998248	-280
0.00726926	0.050727	-280
0.236643	-0.109024	-280
0.260611	-0.101464	-280
0.274904	-0.0694993	-280
0.302143	-0.140816	-280
0.315584	-0.0502567	-280
0.272554	-0.155306	-280
0.233464	-0.189286	-280
0.235023	-0.260721	-280
0.25771	-0.275035	-280
0.304316	-0.28545	-280
0.301079	-0.259623	-280
0.372201	-0.284473	-280
0.404603	-0.211644	-280
0.389544	-0.179542	-280
0.278357	-0.192271	-280
0.351004	-0.180643	-280
0.327708	-0.367478	-280
0.00806702	0.0402291	-240
0.0287708	0.121713	-240
0.0494046	0.15976	-240
0.0918821	0.201257	-240
0.10378	0.204613	-240
0.110777	0.0947996	-240
0.125948	0.0903581	-240
0.128602	0.109803	-240
0.138665	0.0917651	-240
0.128108	-0.00595188	-240
0.149482	0.0283519	-240
0.151822	-0.00100835	-240
0.180435	-0.112767	-240
0.195243	-0.0212228	-240
0.200325	0.242156	-240
0.264139	0.296238	-240
0.216947	0.166867	-240
0.236806	0.145321	-240
0.257099	0.112832	-240
0.255661	0.0587883	-240
0.253209	0.0230184	-240
0.191522	0.12241	-240
0.274224	0.111678	-240
0.285561	-0.0857751	-240
0.296421	-0.210742	-240
0.280348	-0.206144	-240
0.258623	-0.227712	-240
0.228444	-0.34012	-240
0.234963	-0.377447	-240
0.186744	-0.363653	-240
0.294956	-0.369765	-240
0.322919	-0.329376	-240
0.335089	-0.298908	-240
0.425353	0.0528581	-240
0.318949	-0.379365	-240
0.333495	-0.356551	-240
0.0757391	0.0652421	-200
0.109222	0.155562	-200
0.114847	0.0949471	-200
0.121966	0.0268436	-200
0.125334	-0.000838333	-200
0.138391	0.00966633	-200
0.147332	0.0515916	-200
0.156699	0.147708	-200
0.142191	0.211611	-200
0.180479	0.221545	-200
0.101176	-0.0619604	-200
0.193019	0.044034	-200
0.205646	0.0220505	-200
0.211575	0.122351	-200
0.190151	0.127702	-200
0.191186	0.15286	-200
0.20954	0.160669	-200
0.214974	0.204994	-200
0.25837	0.317183	-200
0.281723	0.161393	-200
0.249585	0.0816962	-200
0.241622	-0.155722	-200
0.3919	-0.186016	-200
0.272003	-0.338004	-200
0.35345	-0.353285	-200
0.222406	-0.250221	-200
0.212143	-0.346189	-200
0.0880992	0.199238	-160
0.0941951	0.176291	-160
0.104224	0.18288	-160
0.114992	0.173723	-160
0.128961	0.124258	-160
0.163353	0.122917	-160
0.161783	0.145699	-160
0.20186	0.16859	-160
0.230773	0.249586	-160
0.22805	0.162333	-160
0.257715	0.141957	-160
0.294553	0.0286951	-160
0.252074	0.0355987	-160
0.198913	0.0603816	-160
0.171435	0.0300068	-160
0.13612	0.0296391	-160
0.206501	-0.0796843	-160
0.231969	-0.0684503	-160
0.242993	-0.0531513	-160
0.252821	-0.0657734	-160
0.250537	-0.111103	-160
0.234695	-0.154171	-160
0.237984	-0.0127724	-160
0.276398	-0.148805	-160
0.234392	-0.269463	-160
0.231901	-0.334015	-160
0.25963	-0.366543	-160
0.327405	-0.29231	-160
0.386135	-0.217723	-160
0.0755316	0.118102	-120
0.0851	0.235946	-120
0.103667	0.142534	-120
0.122146	0.0802159	-120
0.139959	0.129511	-120
0.155828	0.140616	-120
0.175888	0.171396	-120
0.182476	0.178005	-120
0.183779	0.19249	-120
0.185005	0.135676	-120
0.152387	0.0806378	-120
0.159926	0.0542349	-120
0.162553	0.0155574	-120
0.182286	0.0683089	-120
0.183215	0.102957	-120
0.200831	0.0425562	-120
0.20723	-0.060531	-120
0.237439	-0.0271837	-120
0.236537	0.00765949	-120
0.246437	0.00111574	-120
0.251908	-0.0342153	-120
0.289122	-0.0125781	-120
0.258355	0.104073	-120
0.260201	0.138623	-120
0.267815	0.183519	-120
0.242334	0.189901	-120
0.243137	0.151418	-120
0.254789	0.312912	-120
0.3444	0.0674642	-120
0.30712	-0.0931304	-120
0.361517	-0.148308	-120
0.381094	-0.135774	-120
0.258892	-0.217809	-120
0.256532	-0.23768	-120
0.336622	-0.359596	-120
0.232103	-0.363075	-120
0.040408	0.0363295	-80
0.0993853	0.204561	-80
0.1069	0.263111	-80
0.10747	0.0974986	-80
0.124683	0.122112	-80
0.1192	0.0666634	-80
0.132842	0.0559978	-80
0.170625	0.155871	-80
0.171064	0.0465975	-80
0.191169	0.0332167	-80
0.198478	0.107145	-80
0.220901	0.122412	-80
0.222497	0.0965702	-80
0.230885	0.0747773	-80
0.243684	0.164918	-80
0.290514	0.0790992	-80
0.333315	0.145769	-80
0.349421	0.0289315	-80
0.369333	-0.00831818	-80
0.269273	-0.108691	-80
0.222831	-0.113362	-80
0.231189	-0.15563	-80
0.260219	-0.199419	-80
0.211243	-0.316317	-80
0.197821	-0.360277	-80
0.237837	-0.371662	-80
0.243895	-0.343599	-80
0.33012	-0.256419	-80
0.339841	-0.230644	-80
0.331453	-0.208851	-80
0.366601	-0.144392	-80
0.388986	-0.14961	-80
0.40302	-0.112561	-80
0.0635398	0.0359373	-40
0.0739701	0.257672	-40
0.102123	0.0941719	-40
0.120921	0.1068	-40
0.1424	0.119385	-40
0.128299	0.19105	-40
0.137822	0.0772646	-40
0.164162	0.234644	-40
0.174973	0.267535	-40
0.155446	0.31726	-40
0.235719	0.261343	-40
0.19339	0.138977	-40
0.219229	0.111181	-40
0.271219	0.172922	-40
0.311452	0.179794	-40
0.242367	0.0779038	-40
0.249353	0.0173209	-40
0.254665	-0.00106993	-40
0.202778	-0.0224804	-40
0.166322	0.0421088	-40
0.169458	-0.119277	-40
0.173784	-0.1725	-40
0.223068	-0.119887	-40
0.259312	-0.265149	-40
0.259128	-0.332992	-40
0.279631	-0.351556	-40
0.305847	-0.240007	-40
0.336378	-0.183522	-40
0.347983	-0.189155	-40
0.355262	-0.141564	-40
0.367801	-0.128877	-40
0.367911	-0.0885346	-40
0.374452	0.0158966	-40
0.0050994	-0.0552508	0
0.0683596	0.0225292	0
0.0956319	0.0727933	0
0.109061	0.0897315	0
0.0834928	0.106836	0
0.118025	0.223925	0
0.146229	0.27411	0
0.174434	0.251268	0
0.174799	0.302339	0
0.179954	0.212404	0
0.22349	0.208149	0
0.235525	0.279976	0
0.213126	0.128844	0
0.289362	0.132341	0
0.150829	0.125808	0
0.157781	0.106878	0
0.176641	0.0448018	0
0.156633	0.0248494	0
0.185585	-0.00535659	0
0.206854	-0.0457716	0
0.21398	-0.0209147	0
0.221711	0.027614	0
0.246651	-0.124499	0
0.175833	-0.134005	0
0.33627	-0.105883	0
0.3604	-0.14292	0
0.374395	-0.177144	0
0.399712	-0.0573192	0
0.285124	-0.365544	0
0.0993241	0.171681	40
0.0808796	0.0785475	40
0.0950645	0.0745497	40
0.15382	0.00306855	40
0.170688	0.118091	40
0.155049	0.152362	40
0.171275	0.158337	40
0.175437	0.183317	40
0.191828	0.135583	40
0.187519	0.100545	40
0.218193	0.120954	40
0.22571	0.181026	40
0.230165	0.160692	40
0.235323	0.188978	40
0.231895	0.214314	40
0.286299	0.104434	40
0.32545	-0.00978885	40
0.281447	-0.0329533	40
0.209545	-0.0162605	40
0.233038	-0.0978764	40
0.242254	-0.116751	40
0.334586	-0.164593	40
0.363261	-0.150796	40
0.247479	-0.214325	40
0.187813	-0.204893	40
0.197707	-0.307718	40
0.24372	-0.341697	40
0.234767	-0.36981	40
0.227885	-0.386287	40
0.26571	-0.3964	40
0.19646	-0.393245	40
0.0998076	0.0453931	80
0.111718	0.0219289	80
0.143917	0.0820975	80
0.130578	0.154753	80
0.179436	0.106529	80
0.186271	0.0655845	80
0.205062	0.0577414	80
0.17274	0.00982022	80
0.128085	-0.00690479	80
0.122801	-0.0274	80
0.199413	-0.0238507	80
0.207184	-0.0511949	80
0.204266	-0.107262	80
0.271159	0.174743	80
0.270467	0.122867	80
0.273682	0.197242	80
0.247451	0.111567	80
0.24333	0.0939322	80
0.267579	0.0392707	80
0.285876	-0.0036592	80
0.313612	-0.0497503	80
0.304092	-0.0756343	80
0.36758	-0.108035	80
0.259762	-0.10159	80
0.241837	-0.220815	80
0.183888	-0.317818	80
0.171962	-0.378447	80
0.22587	-0.381675	80
0.246871	-0.371541	80
0.275589	-0.333706	80
0.0831396	0.0778221	120
0.0988634	0.18743	120
0.131991	0.21453	120
0.196618	0.184706	120
0.259832	0.232458	120
0.260712	0.261001	120
0.189487	0.138243	120
0.208457	0.0757891	120
0.148804	-0.0413582	120
0.199963	-0.0766208	120
0.212738	-0.0627038	120
0.23821	-0.0685418	120
0.22257	-0.144478	120
0.224912	-0.0992424	120
0.237151	-0.164415	120
0.242543	-0.205349	120
0.257952	-0.198418	120
0.211253	-0.234318	120
0.327663	-0.402184	120
0.365556	-0.220632	120
0.343283	0.0122187	120
0.00748176	0.0236887	160
0.0047127	-0.0404358	160
0.0903071	0.023256	160
0.0927374	0.11003	160
0.109212	0.176405	160
0.157773	0.100739	160
0.152716	0.0246344	160
0.15636	-0.0191806	160
0.157822	-0.036707	160
0.208905	0.0126695	160
0.188194	0.108458	160
0.222319	0.14369	160
0.234321	0.189594	160
0.228343	0.289291	160
0.255518	0.111147	160
0.230533	-0.050158	160
0.318558	-0.0388823	160
0.38106	-0.138402	160
0.265771	-0.218587	160
0.197335	-0.295983	160
0.225383	-0.338502	160
0.069022	-0.000476326	200
0.110028	0.214679	200
0.136998	0.188952	200
0.156156	0.0605475	200
0.149053	0.0306195	200
0.188804	0.118051	200
0.195447	0.101861	200
0.201109	0.0839198	200
0.205398	0.124607	200
0.205555	0.140574	200
0.219267	0.150769	200
0.266754	0.234391	200
0.248817	0.0912414	200
0.221394	0.0708393	200
0.222644	-0.000190105	200
0.230729	-0.0678875	200
0.216925	-0.18634	200
0.267434	-0.0921614	200
0.289341	-0.0396345	200
0.301129	-0.0276042	200
0.300849	0.0433934	200
0.334283	0.0813429	200
0.330539	0.195042	200
0.401596	-0.0929986	200
0.414034	-0.212311	200
0.28107	-0.287817	200
0.202981	-0.318977	200
0.228096	-0.335771	200
0.236408	-0.380416	200
0.269277	-0.399236	200
0.00544514	0.0437323	240
0.0885596	0.191519	240
0.104012	0.188135	240
0.170972	0.209822	240
0.203448	0.219924	240
0.198839	0.254517	240
0.194656	0.273726	240
0.259866	0.218899	240
0.297091	0.143249	240
0.299406	0.071398	240
0.198017	0.121643	240
0.172759	0.0681322	240
0.178884	0.0487232	240
0.158221	0.0151675	240
0.189807	-0.0547526	240
0.20428	0.0237907	240
0.248043	-0.0321052	240
0.275307	-0.00439576	240
0.270223	-0.0379343	240
0.279735	-0.0440862	240
0.29428	-0.0456695	240
0.324759	-0.0370522	240
0.283262	-0.0819657	240
0.294659	-0.117309	240
0.218191	-0.160118	240
0.262801	-0.219532	240
0.264691	-0.275987	240
0.261812	-0.412052	240
0.23895	-0.343082	240
0.430299	-0.217309	240
0.0818137	0.214435	280
0.182732	0.29515	280
0.166683	0.232224	280
0.162425	0.179777	280
0.16955	0.117316	280
0.191012	0.0748775	280
0.171957	-0.0162095	280
0.212839	0.129085	280
0.207568	0.154573	280
0.195082	0.209052	280
0.239109	0.228338	280
0.297847	0.141322	280
0.275508	-0.115466	280
0.281934	-0.150125	280
0.227498	-0.123985	280
0.275693	-0.271521	280
0.0819038	0.316426	320
0.0791768	0.224329	320
0.132792	0.127698	320
0.170265	0.226564	320
0.243509	0.245997	320
0.174875	0.110704	320
0.203327	0.0962818	320
0.144325	0.0480728	320
0.191335	0.0277564	320
0.204266	-0.0704977	320
0.203437	-0.16057	320
0.288673	-0.156966	320
0.300861	-0.054672	320
0.309157	0.00603983	320
0.334615	-0.00488074	320
0.00760473	-0.0626156	360
0.0756929	0.241248	360
0.0876434	0.230756	360
0.10286	0.105513	360
0.161476	0.19585	360
0.144281	0.0488826	360
0.171347	-0.0491372	360
0.196254	0.0312315	360
0.229233	0.0669176	360
0.207792	-0.169876	360
0.230445	-0.351813	360
0.354702	-0.418462	360
0.283698	-0.141018	360
0.297134	-0.135454	360
0.347821	0.0631144	360
0.369168	0.063663	360
0.186895	0.260444	400
0.231076	0.294523	400
0.287533	0.165501	400
0.213995	0.146031	400
0.203133	0.115618	400
0.22566	0.113305	400
0.193084	0.0281494	400
0.174246	-0.049018	400
0.238924	-0.0437093	400
0.248955	0.0376469	400
0.276097	-0.0645414	400
0.28864	-0.129887	400
0.304298	-0.136194	400
0.176007	0.184033	440
0.231439	0.183738	440
0.274892	0.0922398	440
0.333665	0.0969584	440
0.250935	-0.0118284	440
0.180716	-0.0780053	440
0.158007	0.0173582	440
0.27377	-0.280745	440
0.299453	-0.260945	440
0.323025	-0.418043	440
0.3457	-0.416386	440
0.283202	-0.394341	440
0.157051	0.242843	480
0.165411	0.17614	480
0.195147	0.139023	480
0.219792	0.193155	480
0.269974	0.291878	480
0.266723	0.16869	480
0.276008	0.0943633	480
0.277351	-0.0707288	480
0.287462	-0.0635044	480
0.261988	-0.10052	480
0.217206	-0.161502	480
0.187789	-0.0921435	480
0.283705	-0.236002	480
0.375943	-0.14827	480
0.0429151	0.0249994	520
0.0626343	0.0704527	520
0.0885056	0.193146	520
0.155033	0.179069	520
0.179123	0.206322	520
0.170201	0.120541	520
0.148321	0.170121	520
0.256171	0.0773444	520
0.279181	0.0216652	520
0.244387	-0.056367	520
0.253219	-0.14039	520
0.253402	-0.192135	520
0.268711	-0.256875	520
0.323837	-0.421181	520
0.161493	0.164903	560
0.171773	0.0312442	560
0.195264	0.0551524	560
0.244718	-0.0712024	560
0.336939	0.175866	560
0.309268	-0.0355755	560
0.338059	-0.0836619	560
0.296344	-0.170258	560
0.281369	-0.271969	560
0.150123	0.287407	600
0.154854	0.344559	600
0.167605	0.140671	600
0.161629	0.0637152	600
0.219116	0.133331	600
0.250868	0.080737	600
0.259049	0.00299377	600
0.232456	-0.105932	600
0.283028	-0.192702	600
0.307451	-0.180836	600
0.315261	-0.119452	600
0.313514	-0.0111382	600
0.313802	0.0131267	600
0.189368	0.279924	640
0.265665	0.315766	640
0.205105	0.215697	640
0.249743	0.115719	640
0.278192	-0.0467451	640
0.326297	-0.2073	640
0.34673	-0.214086	640
0.289085	-0.357476	640
0.356868	-0.404401	640
0.265978	0.299142	680
0.111338	0.131272	680
0.0969065	0.0430414	680
0.162885	0.109751	680
0.174223	0.049499	680
0.201029	-0.00645761	680
0.213403	-0.0129152	680
0.211338	-0.0581045	680
0.22577	-0.20444	680
0.202058	-0.363704	680
0.339173	-0.223812	680
0.0131816	0.1078	720
0.123777	0.100359	720
0.11678	0.321268	720
0.171597	0.410264	720
0.291869	0.108988	720
0.315126	-0.0130512	720
0.277639	0.00121628	720
0.278383	-0.0473674	720
0.251154	-0.062064	720
0.279472	-0.380699	720
0.155384	0.204134	760
0.131178	0.150784	760
0.132116	0.0902659	760
0.194708	-0.0443605	760
0.244233	-0.00939414	760
0.228088	-0.380816	760
0.108813	0.209194	800
0.181967	0.0797773	800
0.235288	0.239135	800
0.243687	0.0698176	800
0.246744	0.00804056	800
0.271825	-0.110336	800
0.278859	-0.183859	800
0.12072	0.281229	840
0.193557	0.278307	840
0.248485	0.305996	840
0.172102	0.170292	840
0.177731	0.0910821	840
0.264293	-0.0383631	840
0.320901	-0.269064	840
0.145353	0.148495	880
0.240024	-0.128211	880
0.285503	-0.145435	880
0.293504	-0.278059	880
0.321666	-0.288518	880
0.352071	-0.26962	880
0.367294	-0.386337	880
0.315587	-0.359741	880
0.18435	0.285329	920
0.156503	0.181849	920
0.159715	0.133194	920
0.134579	0.226665	960
0.241941	0.239858	960
0.271114	-0.0118683	960
0.398662	-0.198072	960
0.369453	-0.326057	960
0.260937	0.250007	1040
0.204475	0.231353	1040
0.0512677	0.0916927	1040
0.26066	0.274044	1080
0.28197	0.196926	1080
0.208728	0.220639	1080
0.235565	0.1022	1080
0.312146	-0.232567	1080
0.157472	0.0317164	1120
0.18161	0.148816	1120
0.214943	0.109782	1120
0.228732	0.056116	1120
0.2	-0.124416	1120
0.3	-0.104899	1120
0.351724	-0.121982	1120
0.340228	-0.056116	1120
0.359772	0.0658663	1120
0.332179	0.153699	1120
0.26958	0.121257	1160
-0.146728	-0.228202	-2000
-0.112193	-0.164323	-1960
-0.116212	-0.102025	-1920
-0.0918762	-0.221379	-1920
-0.170807	-0.211282	-1920
-0.189882	-0.24024	-1880
-0.181759	0.0802136	-1840
-0.185065	-0.232479	-1840
-0.124202	-0.229326	-1720
-0.127112	-0.0294871	-1680
-0.0881787	-0.133311	-1640
-0.128877	-0.158064	-1640
-0.13545	-0.150933	-1600
-0.106702	-0.145268	-1600
-0.11848	-0.271648	-1560
-0.187547	-0.187124	-1560
-0.0736947	-0.074711	-1520
-0.0700871	-0.227504	-1520
-0.116589	-0.271996	-1520
-0.188307	-0.0338091	-1520
-0.0673647	-0.233118	-1480
-0.100914	-0.280115	-1480
-0.117017	-0.144975	-1480
-0.115809	-0.156594	-1440
-0.101404	-0.172531	-1440
-0.0990079	-0.214597	-1440
-0.0936941	-0.226493	-1320
-0.134609	-0.22156	-1280
-0.00351225	-0.0472096	-1200
-0.104797	-0.0582071	-1200
-0.12398	-0.202495	-1200
-0.172543	-0.258825	-1200
-0.151858	-0.22047	-1160
-0.0451517	0.0119484	-1120
-0.183626	-0.184216	-1120
-0.00252244	-0.0951787	-1080
-0.0804978	-0.178075	-1080
-0.0915473	-0.157887	-1080
-0.137396	-0.180263	-1080
-0.180373	0.182056	-1040
-0.177094	-0.232503	-1040
-0.139419	-0.229164	-1000
-0.149469	-0.159801	-1000
-0.0942794	-0.22331	-960
-0.148851	-0.299312	-960
-0.167384	-0.256607	-960
-0.00384127	-0.0946625	-960
-0.134353	-0.266885	-920
-0.115253	-0.171914	-880
-0.133335	-0.224657	-880
-0.0566879	-0.119644	-800
-0.089946	-0.109643	-800
-0.278212	0.0462286	-800
-0.0707182	-0.0329623	-760
-0.0551365	-0.16019	-760
-0.221944	-0.167578	-720
-0.0736257	-0.185074	-720
-0.0615059	-0.134233	-720
-0.212159	-0.0397757	-680
-0.0961588	-0.130618	-680
-0.100304	-0.243508	-680
-0.0941456	-0.125641	-640
-0.0774605	-0.182283	-640
-0.0911737	-0.207416	-640
-0.00200481	-0.0560817	-560
-0.0519994	0.162287	-560
-0.00314562	-0.0517532	-520
-0.105609	-0.1905	-520
-0.212195	-0.0649942	-440
-0.126704	-0.197558	-440
-0.0573451	-0.19308	-440
-0.062954	0.00310781	-440
-0.149827	-0.215268	-400
-0.106521	-0.284199	-400
-0.0980412	-0.208676	-320
0.00526834	-0.0764288	-320
0.00205578	-0.108557	-320
-0.131585	-0.186794	-240
-0.132243	-0.246607	-240
-0.00641142	0.0951589	-200
-0.0129933	-0.00537886	-160
-0.150186	-0.209797	-160
-0.18477	-0.271258	-160
-0.00543124	-0.0565121	-120
-0.00675704	-0.102075	-120
-0.166851	-0.201342	-120
-0.149525	-0.224334	-120
-0.136802	-0.275366	-120
-0.123201	-0.296018	-120
-0.00381999	-0.115636	-80
-0.102343	-0.253377	-80
-0.100555	-0.131899	-40
-0.108935	-0.202476	-40
-0.0634939	0.0412561	0
-0.113183	0.127908	0
-0.104355	-0.15399	0
-0.190377	-0.277317	0
-0.101671	-0.170774	40
-0.133499	-0.270484	120
-0.146316	-0.250013	160
-0.204969	-0.213285	240
-0.115034	-0.188239	240
-0.104221	-0.223121	240
-0.0711278	-0.267818	240
0.117855	-0.145159	320
0.148535	-0.20218	320
-0.101585	-0.178731	360
-0.14794	-0.22861	360
-0.161263	-0.155907	360
-0.0981091	-0.0959336	400
-0.198791	-0.116009	400
-0.149249	-0.242152	400
-0.082753	-0.221244	400
-0.134302	-0.214519	480
-0.0486703	-0.105845	520
-0.180228	-0.25797	520
-0.170297	-0.312725	680
-0.216961	-0.179279	720
-0.28084	-0.358572	720
-0.00678087	0.117482	800
-0.00278554	0.0933783	800
-0.129304	-0.257872	800
-0.266268	-0.322344	800
-0.133228	-0.301087	840
-0.187002	-0.348645	880
-0.177121	-0.25698	1080

## Sheet: Sheet2
0.324526	-0.262448	-1200
0.308934	-0.258538	-680
0.329985	-0.255224	-720
0.295727	-0.250802	-1080
0.383295	-0.22131	-280
0.325962	-0.211594	-680
0.321579	-0.200948	-760
0.332612	-0.198786	-280
0.363594	-0.192957	-200
0.320383	-0.181269	-1160
0.319799	-0.172097	-240
0.367692	-0.165337	-520
0.364016	-0.152547	-800
0.353604	-0.15254	-640
0.369631	-0.150677	-720
0.361647	-0.146712	-680
0.372854	-0.139377	-480
0.358604	-0.128582	-440
0.361429	-0.127133	-520
0.313248	-0.124068	-720
0.301575	-0.122641	-280
0.360683	-0.120928	-280
0.368829	-0.120266	-800
0.325256	-0.115903	-800
0.364053	-0.109649	-360
0.330467	-0.106718	-280
0.383225	-0.104255	-720
0.421366	-0.10372	-760
0.354132	-0.103641	-640
0.392325	-0.103522	-760
0.335221	-0.102167	-840
0.389317	-0.100699	-800
0.376077	-0.0992894	-520
0.369862	-0.0883989	-800
0.352423	-0.0850084	-840
0.3434	-0.0809901	-280
0.369457	-0.0706091	-600
0.404981	-0.0697068	-680
0.392925	-0.0627801	-280
0.408493	-0.0598095	-760
0.364545	-0.05942	-840
0.371687	-0.0522737	-760
0.355038	-0.0457591	-800
0.365209	-0.0419355	-240
0.339329	-0.0329858	-360
0.393935	-0.0276328	-680
0.36781	-0.013922	-600
