# Supplementary material for: Spinal premotor interneurons controlling antagonistic muscles are spatially intermingled
Source: eLife. 2022 Dec 13;11:e81976. doi: 10.7554/eLife.81976 (PMC9844990; doi:10.7554/eLife.81976)
Supplement: Figure 12—figure supplement 12—source data 2. [file elife-81976-fig12-figsupp12-data2.xlsx]

## Sheet: Sheet1
0.115266	0.227988	-2000
0.184344	0.174145	-2000
0.207375	0.23714	-2000
0.187777	0.142041	-2000
0.230101	0.151337	-2000
0.258969	0.155697	-2000
0.251742	0.073892	-2000
0.265746	-0.026422	-2000
0.284984	-0.0773257	-2000
0.258746	-0.118035	-2000
0.182014	-0.167085	-2000
0.129481	-0.043575	-2000
0.136614	-0.0389787	-2000
0.137013	0.0242146	-2000
0.370547	-0.0993985	-2000
0.35239	-0.258995	-2000
0.3265	-0.355836	-2000
0.300325	-0.39935	-2000
0.273454	-0.412029	-2000
0.250101	-0.298174	-2000
0.071588	0.23328	-1920
0.0987775	0.220473	-1920
0.0704213	0.05807	-1920
0.121079	0.027491	-1920
0.159637	0.0917041	-1920
0.17939	0.0689382	-1920
0.18797	0.0312361	-1920
0.203196	0.0894635	-1920
0.242921	0.190049	-1920
0.218625	0.209774	-1920
0.1824	0.218319	-1920
0.14177	0.284088	-1920
0.175901	0.348899	-1920
0.311488	0.162533	-1920
0.388815	-0.0634589	-1920
0.326718	-0.0843099	-1920
0.295807	-0.076482	-1920
0.266331	-0.107205	-1920
0.248393	-0.166893	-1920
0.243318	-0.325131	-1920
0.270508	-0.337938	-1920
0.113298	0.228446	-1880
0.18457	0.242055	-1880
0.193619	0.261618	-1880
0.229409	0.279503	-1880
0.191487	0.0888901	-1880
0.277089	0.0552596	-1880
0.320454	0.0772515	-1880
0.321451	0.0594533	-1880
0.366048	-0.0748048	-1880
0.393795	-0.0942598	-1880
0.239182	-0.125813	-1880
0.193641	-0.142374	-1880
0.165493	-0.0989456	-1880
0.0551301	0.0136849	-1880
0.269288	-0.223916	-1880
0.251459	-0.288541	-1880
0.242368	-0.346255	-1880
0.290641	-0.348013	-1880
0.26928	-0.336828	-1880
0.316309	-0.398653	-1880
0.203009	-0.307419	-1880
0.215524	0.346478	-1800
0.191043	0.300626	-1800
0.203207	0.224803	-1800
0.171125	0.207971	-1800
0.189706	0.135522	-1800
0.202353	0.115286	-1800
0.126606	0.0677971	-1800
0.142914	-0.0361303	-1800
0.177885	-0.0892812	-1800
0.197613	-0.0725528	-1800
0.216672	-0.13837	-1800
0.283947	-0.269301	-1800
0.277106	-0.302943	-1800
0.325569	-0.364723	-1800
0.359353	-0.336524	-1800
0.332311	-0.185859	-1800
0.301963	-0.154193	-1800
0.283224	-0.120528	-1800
0.295383	-0.0376371	-1800
0.337553	-0.0521812	-1800
0.345807	0.0621362	-1800
0.282969	0.14461	-1800
0.412626	-0.136206	-1800
0.417776	-0.223664	-1800
0.260991	0.310244	-1760
0.201025	0.236972	-1760
0.168758	0.274974	-1760
0.19544	0.174039	-1760
0.233049	0.0958012	-1760
0.173472	0.026917	-1760
0.124624	0.0989954	-1760
0.072932	0.0386051	-1760
0.18028	-0.0570712	-1760
0.183168	-0.0847313	-1760
0.19583	-0.203103	-1760
0.201017	-0.285202	-1760
0.254878	-0.280724	-1760
0.265453	-0.251947	-1760
0.275394	-0.330738	-1760
0.307218	-0.353665	-1760
0.303528	-0.375182	-1760
0.320307	-0.386868	-1760
0.315204	-0.1432	-1760
0.318054	-0.181317	-1760
0.300289	-0.130496	-1760
0.277388	-0.0873618	-1760
0.268503	-0.026778	-1760
0.271751	0.00981367	-1760
0.334428	0.0734249	-1760
0.330217	0.0460458	-1760
0.340541	-0.0283552	-1760
0.414865	-0.295313	-1760
0.0955539	0.277955	-1720
0.10468	0.186311	-1720
0.0925628	0.133183	-1720
0.130882	0.184653	-1720
0.156102	0.181442	-1720
0.208481	0.0944354	-1720
0.310515	0.141336	-1720
0.333623	0.0349841	-1720
0.317343	-0.0424878	-1720
0.367455	-0.01242	-1720
0.262496	-0.105851	-1720
0.310426	-0.12432	-1720
0.213781	-0.252758	-1720
0.247542	-0.287398	-1720
0.236672	-0.320847	-1720
0.319006	-0.377768	-1720
0.333738	-0.352657	-1720
0.36919	-0.360464	-1720
0.211412	-0.0956185	-1720
0.0685973	0.191965	-1640
0.0728945	0.0932953	-1640
0.107165	-0.00358995	-1640
0.134117	0.072114	-1640
0.172954	0.179876	-1640
0.19678	0.237548	-1640
0.218573	0.229894	-1640
0.219855	0.205141	-1640
0.22671	0.0989265	-1640
0.179235	0.0690708	-1640
0.189993	-0.054954	-1640
0.203985	-0.0479868	-1640
0.201949	-0.0923135	-1640
0.197379	-0.296984	-1640
0.224852	-0.273152	-1640
0.239935	-0.271495	-1640
0.279986	-0.161002	-1640
0.271286	-0.0975835	-1640
0.312241	-0.0568867	-1640
0.323217	0.0239974	-1640
0.303976	0.0450931	-1640
0.391804	-0.0923236	-1640
0.378615	-0.323995	-1640
0.323408	-0.366702	-1640
0.032879	0.0398229	-1600
0.0602158	0.0304498	-1600
0.105581	0.120521	-1600
0.172262	0.236827	-1600
0.172081	0.163104	-1600
0.210217	0.159295	-1600
0.217955	0.195663	-1600
0.20167	0.0876055	-1600
0.140237	0.0533464	-1600
0.209466	0.00783874	-1600
0.189678	-0.0652245	-1600
0.162359	-0.0736096	-1600
0.269976	0.00542831	-1600
0.348981	-0.0451951	-1600
0.295783	-0.145647	-1600
0.262323	-0.245447	-1600
0.205377	-0.268492	-1600
0.241296	-0.304539	-1600
0.287936	-0.326803	-1600
0.323267	-0.359978	-1600
0.388677	-0.319861	-1600
0.295151	0.308101	-1560
0.283023	0.32156	-1560
0.206748	0.256295	-1560
0.197541	0.233403	-1560
0.183926	0.201234	-1560
0.152966	0.183856	-1560
0.208648	0.169743	-1560
0.268552	0.153076	-1560
0.196832	0.0792306	-1560
0.14985	0.0911381	-1560
0.129331	0.0711137	-1560
0.100443	0.115541	-1560
0.104865	-0.0117374	-1560
0.22191	-0.0948327	-1560
0.219141	-0.00804927	-1560
0.217047	-0.0505536	-1560
0.265638	-0.064354	-1560
0.299508	-0.015063	-1560
0.288402	0.0486085	-1560
0.348119	0.0201188	-1560
0.298454	-0.0949367	-1560
0.26724	-0.183492	-1560
0.27525	-0.290887	-1560
0.285503	-0.305367	-1560
0.346866	-0.374339	-1560
0.359766	-0.359798	-1560
0.0518963	0.0425686	-1520
0.069931	0.185413	-1520
0.08833	0.184003	-1520
0.087765	0.107453	-1520
0.1294	0.0558935	-1520
0.152494	0.130016	-1520
0.174082	0.126297	-1520
0.184167	0.160646	-1520
0.204384	0.172586	-1520
0.184895	0.227958	-1520
0.225322	0.205833	-1520
0.249728	0.206021	-1520
0.210495	0.129684	-1520
0.184595	0.0516407	-1520
0.269645	0.0646577	-1520
0.296915	0.0810147	-1520
0.310735	0.0745842	-1520
0.325217	0.0311738	-1520
0.294921	0.0308896	-1520
0.290837	-0.0248623	-1520
0.327186	-0.0567238	-1520
0.252975	-0.162874	-1520
0.253792	-0.186088	-1520
0.231764	-0.188387	-1520
0.215417	-0.0785762	-1520
0.287778	-0.192828	-1520
0.363469	-0.169874	-1520
0.409072	-0.21319	-1520
0.429549	-0.301004	-1520
0.347902	-0.38234	-1520
0.343765	-0.404335	-1520
0.328861	-0.274935	-1520
0.00414945	-0.241817	-1520
0.212986	0.280343	-1480
0.201157	0.221787	-1480
0.185852	0.175054	-1480
0.208755	0.146102	-1480
0.22124	0.152619	-1480
0.235641	0.161826	-1480
0.216039	0.139688	-1480
0.24122	0.0818938	-1480
0.253689	0.0758351	-1480
0.263489	0.0562409	-1480
0.255388	0.014111	-1480
0.254284	-0.0139392	-1480
0.238	-0.0132766	-1480
0.2102	-0.00518519	-1480
0.199809	0.0428443	-1480
0.21763	0.0764083	-1480
0.289968	0.017011	-1480
0.305857	0.0353096	-1480
0.31135	-0.0335922	-1480
0.270356	-0.0790291	-1480
0.236295	-0.0867826	-1480
0.226213	-0.107998	-1480
0.222555	-0.14803	-1480
0.254727	-0.130406	-1480
0.261264	-0.208992	-1480
0.334863	-0.139731	-1480
0.332888	-0.118831	-1480
0.401194	-0.186724	-1480
0.421283	-0.255893	-1480
0.316512	-0.242368	-1480
0.324765	-0.370092	-1480
0.349811	-0.380677	-1480
0.300851	-0.380221	-1480
0.284053	-0.436044	-1480
0.0870359	0.138438	-1480
0.0646471	0.223876	-1480
0.0483483	0.0154175	-1480
0.0473042	0.0274404	-1440
0.0280784	0.12637	-1440
0.105581	0.202225	-1440
0.150463	0.16007	-1440
0.121834	0.0748764	-1440
0.184849	0.192614	-1440
0.180604	0.260234	-1440
0.206329	0.23026	-1440
0.219633	0.215963	-1440
0.260222	0.169922	-1440
0.213398	0.099807	-1440
0.21416	0.0631683	-1440
0.227617	0.0169011	-1440
0.180183	-0.0485557	-1440
0.167348	-0.041945	-1440
0.168205	0.029432	-1440
0.203614	-0.11012	-1440
0.23323	-0.303505	-1440
0.264465	-0.373917	-1440
0.317415	-0.383895	-1440
0.316938	-0.129743	-1440
0.306431	-0.10828	-1440
0.318159	-0.0858088	-1440
0.298192	-0.0734988	-1440
0.29183	-0.051178	-1440
0.325146	0.116953	-1440
0.315781	0.12757	-1440
0.280664	-0.149813	-1440
0.39669	-0.305272	-1440
0.382712	-0.19958	-1440
0.395191	-0.178749	-1440
0.285031	-0.267662	-1440
0.0468526	0.0384027	-1400
0.0813214	0.24405	-1400
0.0953071	0.22588	-1400
0.123146	0.186366	-1400
0.139993	0.270984	-1400
0.155751	0.255685	-1400
0.182176	0.240237	-1400
0.192544	0.195641	-1400
0.243874	0.223767	-1400
0.294782	0.129632	-1400
0.253507	0.106216	-1400
0.198045	0.0962314	-1400
0.173565	-0.012556	-1400
0.200412	-0.0185423	-1400
0.225533	-0.0449068	-1400
0.187913	-0.191264	-1400
0.253649	-0.171845	-1400
0.268755	-0.145727	-1400
0.276456	-0.119983	-1400
0.307887	-0.077466	-1400
0.367466	-0.104706	-1400
0.281113	-0.257379	-1400
0.256031	-0.267559	-1400
0.238047	-0.321811	-1400
0.0476602	0.318115	-1360
0.132267	0.234179	-1360
0.169935	0.0612538	-1360
0.211699	0.138424	-1360
0.228647	0.138759	-1360
0.277415	0.0720389	-1360
0.200492	-0.0214558	-1360
0.260422	-0.00229643	-1360
0.287897	-0.0392868	-1360
0.296906	-0.0849641	-1360
0.267573	-0.154923	-1360
0.23062	-0.120029	-1360
0.251558	-0.196111	-1360
0.237485	-0.255174	-1360
0.253884	-0.272123	-1360
0.260767	-0.365181	-1360
0.295893	-0.380768	-1360
0.381914	-0.18495	-1360
0.0510714	0.427963	-1320
0.132835	0.246561	-1320
0.198385	0.353364	-1320
0.207244	0.361234	-1320
0.230478	0.30468	-1320
0.241505	0.321663	-1320
0.255842	0.288927	-1320
0.266505	0.331335	-1320
0.245708	0.224239	-1320
0.232057	0.237839	-1320
0.218063	0.261001	-1320
0.336793	0.237602	-1320
0.299	0.144721	-1320
0.305661	0.0943743	-1320
0.250014	0.112517	-1320
0.248651	0.0541467	-1320
0.212356	0.119437	-1320
0.187603	0.0336705	-1320
0.207028	0.017416	-1320
0.166291	0.0946268	-1320
0.121583	0.1282	-1320
0.0951752	0.026878	-1320
0.163393	-0.00942215	-1320
0.167953	-0.0514652	-1320
0.16758	-0.0910085	-1320
0.189137	-0.0664496	-1320
0.205672	-0.040956	-1320
0.236371	-0.116322	-1320
0.245179	-0.141718	-1320
0.238294	-0.192737	-1320
0.212377	-0.284639	-1320
0.147625	-0.359893	-1320
0.245454	-0.314482	-1320
0.259806	-0.363079	-1320
0.350488	-0.357559	-1320
0.0460965	-0.0951748	-1280
0.0340313	0.00729633	-1280
0.060718	0.0618031	-1280
0.119323	0.0603964	-1280
0.081588	-0.251748	-1280
0.0855174	0.215309	-1280
0.0942106	0.503823	-1280
0.199829	0.418561	-1280
0.214316	0.426326	-1280
0.22508	0.383894	-1280
0.229739	0.317281	-1280
0.225209	0.273596	-1280
0.188376	0.227434	-1280
0.15711	0.252511	-1280
0.159298	0.197311	-1280
0.188904	0.178767	-1280
0.212897	0.210631	-1280
0.287239	0.276968	-1280
0.285995	0.346751	-1280
0.272568	0.113498	-1280
0.30423	0.148419	-1280
0.29892	0.116106	-1280
0.315799	0.0994867	-1280
0.324919	0.0651949	-1280
0.341894	0.0631673	-1280
0.21803	0.0872272	-1280
0.201365	0.00653256	-1280
0.241196	-0.00740952	-1280
0.303252	-0.128927	-1280
0.290696	-0.101046	-1280
0.362973	-0.089807	-1280
0.389243	-0.0985507	-1280
0.369205	-0.304065	-1280
0.323979	-0.33542	-1280
0.286522	-0.347507	-1280
0.271037	-0.377943	-1280
0.252551	-0.346692	-1280
0.265523	-0.31131	-1280
0.231691	-0.289411	-1280
0.213296	-0.245176	-1280
0.201204	-0.275706	-1280
0.172009	-0.323672	-1280
0.0979441	0.457838	-1240
0.0824269	0.154608	-1240
0.123218	0.131576	-1240
0.127031	0.0889849	-1240
0.156885	0.0195607	-1240
0.185465	-0.00778157	-1240
0.180206	0.10705	-1240
0.20149	0.204974	-1240
0.197761	0.232486	-1240
0.167063	0.251876	-1240
0.229223	0.328422	-1240
0.304017	0.233485	-1240
0.306053	0.139358	-1240
0.216504	0.0798706	-1240
0.225406	0.00281887	-1240
0.232443	-0.0270102	-1240
0.260598	-0.0124234	-1240
0.274081	0.016738	-1240
0.190467	-0.161054	-1240
0.220321	-0.146812	-1240
0.207683	-0.192872	-1240
0.222863	-0.197509	-1240
0.279424	-0.180118	-1240
0.350918	-0.172328	-1240
0.16172	-0.254192	-1240
0.181989	-0.310022	-1240
0.224983	-0.323447	-1240
0.228887	-0.364373	-1240
0.260432	-0.367194	-1240
0.334554	-0.391713	-1240
0.0329226	0.0467483	-1200
0.0525439	0.026572	-1200
0.0921653	0.119084	-1200
0.103345	0.180019	-1200
0.11139	0.163029	-1200
0.0566998	0.327455	-1200
0.152335	0.215771	-1200
0.160154	0.18408	-1200
0.209165	0.196848	-1200
0.218883	0.318929	-1200
0.219753	0.261239	-1200
0.236201	0.220599	-1200
0.211097	0.14216	-1200
0.112168	0.0577692	-1200
0.11785	0.0430699	-1200
0.140324	0.00406446	-1200
0.191705	0.00304527	-1200
0.262438	0.0246111	-1200
0.292625	0.103304	-1200
0.292243	0.144443	-1200
0.30894	0.0840378	-1200
0.311332	0.0357713	-1200
0.327757	0.0296102	-1200
0.30391	0.0148368	-1200
0.269927	-0.0349003	-1200
0.293764	-0.171125	-1200
0.224085	-0.1897	-1200
0.19886	-0.0957678	-1200
0.184321	-0.0753499	-1200
0.137007	-0.157531	-1200
0.159277	-0.245729	-1200
0.202014	-0.214817	-1200
0.220941	-0.25614	-1200
0.243634	-0.268947	-1200
0.262841	-0.375998	-1200
0.154635	-0.35607	-1200
0.232795	0.341355	-1160
0.207593	0.355311	-1160
0.143479	0.308228	-1160
0.109243	0.269167	-1160
0.139198	0.250369	-1160
0.094842	0.22477	-1160
0.0917015	0.171977	-1160
0.124756	0.148757	-1160
0.0346369	0.0174861	-1160
0.0929922	-0.0322379	-1160
0.103863	-0.00476942	-1160
0.133655	0.0301166	-1160
0.140291	0.0569403	-1160
0.167751	0.151469	-1160
0.18791	0.165699	-1160
0.207483	0.212288	-1160
0.216596	0.23843	-1160
0.211734	0.100261	-1160
0.245126	0.110936	-1160
0.233458	0.126589	-1160
0.25762	0.0950466	-1160
0.284927	0.130589	-1160
0.306314	0.123035	-1160
0.288405	0.217278	-1160
0.177231	-0.0138215	-1160
0.175341	-0.0598053	-1160
0.218446	-0.0410295	-1160
0.341096	0.0582283	-1160
0.317721	0.0323455	-1160
0.29346	-0.0648323	-1160
0.274737	-0.224304	-1160
0.345517	-0.107484	-1160
0.247726	-0.268873	-1160
0.232207	-0.289728	-1160
0.207401	-0.297345	-1160
0.215537	-0.329939	-1160
0.243532	-0.353582	-1160
0.248208	-0.317296	-1160
0.276784	-0.387589	-1160
0.283636	-0.342944	-1160
0.295711	-0.365867	-1160
0.319366	-0.377606	-1160
0.256164	0.309618	-1120
0.187914	0.244593	-1120
0.130395	0.176479	-1120
0.123729	0.129101	-1120
0.111175	0.111166	-1120
0.109903	0.0868696	-1120
0.123657	0.0505496	-1120
0.137064	0.0297154	-1120
0.144563	0.106132	-1120
0.152999	0.125269	-1120
0.18695	0.116995	-1120
0.209947	0.0702874	-1120
0.251447	0.0321024	-1120
0.288661	0.0321287	-1120
0.301235	-0.0177328	-1120
0.268724	-0.0899857	-1120
0.232231	-0.130293	-1120
0.227722	-0.104338	-1120
0.235285	-0.202044	-1120
0.0829131	-0.184197	-1120
0.155335	-0.323773	-1120
0.184245	-0.341372	-1120
0.212062	-0.293941	-1120
0.229071	-0.32197	-1120
0.22891	-0.284951	-1120
0.259257	-0.315285	-1120
0.320292	-0.362205	-1120
0.37567	-0.338149	-1120
0.393814	-0.246323	-1120
0.0476093	0.264552	-1040
0.0566264	0.162543	-1040
0.0690335	0.141671	-1040
0.10138	0.204094	-1040
0.0924453	0.111076	-1040
0.0567904	0.025382	-1040
0.0938935	0.00242403	-1040
0.1212	0.0741303	-1040
0.11872	0.0505736	-1040
0.127128	0.0325605	-1040
0.150702	-0.020956	-1040
0.132697	0.10993	-1040
0.158107	0.122848	-1040
0.169065	0.0963645	-1040
0.192287	0.137431	-1040
0.218222	0.147118	-1040
0.228799	0.149707	-1040
0.23231	0.191208	-1040
0.20907	0.198904	-1040
0.215798	0.230191	-1040
0.263215	0.223627	-1040
0.28073	0.137091	-1040
0.214677	0.0645089	-1040
0.21772	-0.0126784	-1040
0.206991	-0.041118	-1040
0.231571	-0.142188	-1040
0.20701	-0.204132	-1040
0.214137	-0.250679	-1040
0.226481	-0.239526	-1040
0.181553	-0.34805	-1040
0.266851	-0.394581	-1040
0.265549	-0.260077	-1040
0.266544	-0.168998	-1040
0.396898	-0.285296	-1040
0.376967	-0.254319	-1040
0.378918	-0.203163	-1040
0.352143	-0.188205	-1040
0.312765	-0.170598	-1040
0.293219	-0.193072	-1040
0.412651	-0.127505	-1040
0.00516886	-0.0733108	-1040
0.103748	0.292594	-1000
0.0583743	0.18767	-1000
0.11313	0.206921	-1000
0.0596343	0.104786	-1000
0.0568956	0.0851106	-1000
0.081573	0.0100425	-1000
0.0585198	-0.0724266	-1000
0.123396	0.0606919	-1000
0.139428	0.00920856	-1000
0.168321	0.056363	-1000
0.189156	0.0285924	-1000
0.189526	0.00626748	-1000
0.1944	-0.100055	-1000
0.229055	-0.0976805	-1000
0.210283	-0.153082	-1000
0.25691	-0.218248	-1000
0.236812	-0.252565	-1000
0.203482	-0.345781	-1000
0.258386	-0.324986	-1000
0.252474	-0.386385	-1000
0.345793	-0.385134	-1000
0.299099	-0.259692	-1000
0.411111	-0.107882	-1000
0.31794	-0.05527	-1000
0.338264	-0.0273707	-1000
0.323706	0.0394762	-1000
0.281443	0.0539896	-1000
0.260755	-0.00391754	-1000
0.246643	0.0326431	-1000
0.2912	0.137848	-1000
0.29467	0.217525	-1000
0.256395	0.203713	-1000
0.245312	0.245562	-1000
0.231055	0.228272	-1000
0.231943	0.185154	-1000
0.259795	0.134358	-1000
0.190118	0.239154	-1000
0.181993	0.224505	-1000
0.197658	0.212785	-1000
0.198614	0.179148	-1000
0.192853	0.154182	-1000
0.185687	0.123334	-1000
0.167065	0.156685	-1000
0.0540913	0.224431	-960
0.0821652	0.190285	-960
0.0977769	0.216591	-960
0.0697583	0.152319	-960
0.0820119	0.148825	-960
0.055531	0.122548	-960
0.0746852	0.101701	-960
0.0889018	0.111486	-960
0.0718968	0.06868	-960
0.0868461	0.0474974	-960
0.102623	0.0460805	-960
0.107352	0.0724085	-960
0.0991444	0.0147792	-960
0.118696	0.0184257	-960
0.121822	-0.00399036	-960
0.132852	0.0374607	-960
0.149036	-0.0086688	-960
0.161577	0.030805	-960
0.171322	0.0372478	-960
0.179536	0.00569425	-960
0.208189	-0.0116977	-960
0.179525	0.0748885	-960
0.171802	0.092464	-960
0.136926	0.10549	-960
0.154995	0.151074	-960
0.149504	0.204911	-960
0.160942	0.290831	-960
0.184171	0.159663	-960
0.197367	0.157435	-960
0.196833	0.200649	-960
0.210587	0.264383	-960
0.220894	0.267584	-960
0.230331	0.280278	-960
0.262623	0.335645	-960
0.222107	0.202664	-960
0.229008	0.185323	-960
0.257353	0.0849892	-960
0.33135	0.0100714	-960
0.297951	-0.0188497	-960
0.267931	-0.0671776	-960
0.287219	-0.175697	-960
0.318264	-0.184549	-960
0.329758	-0.197048	-960
0.257409	-0.191791	-960
0.403254	-0.0996124	-960
0.19168	-0.246857	-960
0.193092	-0.299531	-960
0.204937	-0.347505	-960
0.256792	-0.357674	-960
0.246704	-0.397848	-960
0.275186	-0.387526	-960
0.278825	-0.403936	-960
0.296828	-0.36909	-960
0.331913	-0.349883	-960
0.274532	0.46498	-920
0.205281	0.401985	-920
0.143768	0.40495	-920
0.24064	0.344547	-920
0.218358	0.335494	-920
0.23388	0.293239	-920
0.219355	0.275513	-920
0.216912	0.226396	-920
0.214678	0.205425	-920
0.253699	0.165262	-920
0.273245	0.183323	-920
0.237159	0.104932	-920
0.210703	0.15836	-920
0.180858	0.235916	-920
0.163722	0.179062	-920
0.164167	0.135809	-920
0.180231	0.126589	-920
0.143784	0.167731	-920
0.107239	0.157479	-920
0.104411	0.302543	-920
0.0814785	0.258837	-920
0.0756547	0.18406	-920
0.0494998	0.154482	-920
0.076549	0.122446	-920
0.152125	0.0427728	-920
0.270617	0.0314013	-920
0.285694	0.0323991	-920
0.31051	0.166845	-920
0.239953	-0.10316	-920
0.411296	-0.0223388	-920
0.392697	-0.301084	-920
0.337005	-0.385915	-920
0.311554	-0.417352	-920
0.277618	-0.363596	-920
0.278697	-0.322418	-920
0.301849	-0.300331	-920
0.247347	-0.34234	-920
0.255396	-0.40915	-920
0.213555	-0.248806	-920
0.200394	-0.258607	-920
0.282337	-0.255362	-920
0.369336	-0.188756	-920
0.354578	-0.159978	-920
0.268483	-0.15051	-920
0.289675	-0.132884	-920
0.287241	-0.206883	-920
0.319201	-0.215322	-920
0.21779	0.384412	-880
0.191636	0.343888	-880
0.199452	0.291544	-880
0.206756	0.257431	-880
0.243679	0.279177	-880
0.22964	0.201364	-880
0.211741	0.225628	-880
0.204631	0.201036	-880
0.191217	0.196667	-880
0.184108	0.172075	-880
0.19272	0.172088	-880
0.209615	0.169222	-880
0.22437	0.140037	-880
0.153767	0.223217	-880
0.155292	0.153525	-880
0.169054	0.123181	-880
0.144385	0.103179	-880
0.125331	0.11732	-880
0.0877237	0.127386	-880
0.0651303	0.254029	-880
0.0678908	0.0440693	-880
0.0720459	0.0125432	-880
0.0940791	0.00187695	-880
0.116782	-0.0105256	-880
0.116086	0.0588895	-880
0.0715814	-0.0519464	-880
0.144785	-0.0367988	-880
0.155731	-0.0541355	-880
0.228122	-0.0687755	-880
0.259347	0.0917936	-880
0.230131	-0.111572	-880
0.231978	-0.163345	-880
0.258804	-0.154628	-880
0.253018	-0.175169	-880
0.284157	-0.166448	-880
0.370486	-0.232542	-880
0.309378	-0.262431	-880
0.262014	-0.270023	-880
0.23118	-0.223208	-880
0.215278	-0.219184	-880
0.197716	-0.207065	-880
0.174162	-0.149261	-880
0.169563	-0.22736	-880
0.191811	-0.32682	-880
0.222794	-0.349618	-880
0.236197	-0.322692	-880
0.0760492	0.20246	-840
0.0912455	0.212124	-840
0.107725	0.145102	-840
0.0706057	0.0650014	-840
0.0538711	0.057276	-840
0.0979995	0.03778	-840
0.122294	0.00377846	-840
0.112404	-0.0134112	-840
0.12284	-0.184158	-840
0.180913	-0.0761046	-840
0.19679	-0.00708103	-840
0.177925	0.0208863	-840
0.165688	0.0470724	-840
0.186197	0.0491972	-840
0.190558	0.112143	-840
0.176419	0.13579	-840
0.183814	0.184184	-840
0.203014	0.221781	-840
0.200358	0.240817	-840
0.210865	0.265466	-840
0.175656	0.259667	-840
0.269949	0.252648	-840
0.229703	0.124531	-840
0.215482	0.0550629	-840
0.254305	0.0431042	-840
0.280156	0.0483679	-840
0.279175	0.108174	-840
0.287713	0.180695	-840
0.298627	0.148753	-840
0.320592	0.127577	-840
0.294875	0.0215145	-840
0.246607	-0.0601646	-840
0.25909	-0.0833672	-840
0.400154	-0.170135	-840
0.411156	-0.139508	-840
0.382331	-0.324125	-840
0.283762	-0.389236	-840
0.274243	-0.401951	-840
0.263602	-0.3258	-840
0.239974	-0.304189	-840
0.253169	-0.257354	-840
0.275068	-0.228119	-840
0.197785	-0.271479	-840
0.182325	-0.253576	-840
0.21896	-0.281744	-840
0.00620046	-0.0581592	-840
0.068048	0.243282	-800
0.0746597	0.217905	-800
0.0819553	0.183079	-800
0.0869825	0.135217	-800
0.0827164	0.0722049	-800
0.0832513	0.0535879	-800
0.0979699	0.0637544	-800
0.0422164	0.0204408	-800
0.126867	0.102718	-800
0.122873	0.128706	-800
0.134824	0.19975	-800
0.116282	0.280028	-800
0.150854	0.277052	-800
0.190541	0.258435	-800
0.205767	0.194698	-800
0.194768	0.203182	-800
0.186787	0.1845	-800
0.16831	0.171043	-800
0.180822	0.14512	-800
0.207411	0.12345	-800
0.222914	0.148711	-800
0.190271	0.0987789	-800
0.196723	0.071924	-800
0.167149	0.042419	-800
0.159968	0.0311282	-800
0.143196	0.0570199	-800
0.144296	-0.0585775	-800
0.212364	-0.0272936	-800
0.228044	-0.00824634	-800
0.225688	0.017164	-800
0.273904	0.0616018	-800
0.292653	0.0304086	-800
0.242194	-0.0347473	-800
0.243097	-0.136451	-800
0.251728	-0.182503	-800
0.204058	-0.18258	-800
0.212634	-0.20558	-800
0.202106	-0.255628	-800
0.191461	-0.322529	-800
0.189752	-0.361864	-800
0.223184	-0.367519	-800
0.253815	-0.36757	-800
0.255332	-0.251361	-800
0.270343	-0.293525	-800
0.287294	-0.325618	-800
0.0769013	0.265421	-720
0.0689405	0.109532	-720
0.0348969	0.0322762	-720
0.0886158	-0.00755175	-720
0.1235	0.0545946	-720
0.11744	0.097373	-720
0.124482	0.207021	-720
0.152589	0.224169	-720
0.132839	0.279863	-720
0.152952	0.260586	-720
0.157411	0.279534	-720
0.191285	0.308704	-720
0.192417	0.268649	-720
0.206476	0.232413	-720
0.195601	0.189971	-720
0.193286	0.149003	-720
0.210038	0.160308	-720
0.226046	0.173443	-720
0.247875	0.319691	-720
0.225362	0.266495	-720
0.229228	0.109706	-720
0.237708	0.0796615	-720
0.259759	0.0948042	-720
0.273531	0.128322	-720
0.270002	0.0809759	-720
0.280814	0.0471131	-720
0.233077	-0.00229793	-720
0.236524	-0.031241	-720
0.141879	-0.0854344	-720
0.142973	-0.321271	-720
0.218155	-0.236315	-720
0.263314	-0.277606	-720
0.291708	-0.300344	-720
0.363641	-0.242896	-720
0.394013	-0.320812	-720
0.331798	-0.206142	-720
0.274718	-0.135732	-720
0.267174	-0.104233	-720
0.299567	-0.101283	-720
0.354907	0.0377305	-720
0.0454073	0.0361943	-640
0.0789255	0.277011	-640
0.108766	0.157832	-640
0.131939	0.232202	-640
0.161411	0.264616	-640
0.196826	0.284153	-640
0.159262	0.158838	-640
0.182997	0.173431	-640
0.202959	0.184213	-640
0.235098	0.206237	-640
0.270976	0.186964	-640
0.284322	0.135057	-640
0.254007	0.114157	-640
0.204758	0.151503	-640
0.186347	0.0935787	-640
0.218329	0.0689048	-640
0.167185	0.0149023	-640
0.14217	0.08444	-640
0.190938	0.219658	-640
0.226034	-0.0330658	-640
0.242197	-0.0599403	-640
0.255085	-0.0730645	-640
0.271291	-0.0435583	-640
0.265247	0.0128518	-640
0.315505	-0.145615	-640
0.386927	-0.143775	-640
0.39808	-0.357853	-640
0.267044	-0.355039	-640
0.231149	-0.358326	-640
0.21461	-0.347459	-640
0.171193	-0.324572	-640
0.197605	-0.309071	-640
0.24904	-0.184245	-640
0.281705	-0.278392	-640
0.254919	-0.298613	-640
0.26747	0.288422	-600
0.190322	0.214544	-600
0.126153	0.133255	-600
0.0946971	0.126606	-600
0.0591611	-0.0535786	-600
0.0479074	0.00566868	-600
0.136527	0.0154247	-600
0.161127	0.0490625	-600
0.20744	0.114421	-600
0.212697	0.0690274	-600
0.244116	0.0884435	-600
0.237642	0.0467071	-600
0.265344	0.0709709	-600
0.305639	0.0784535	-600
0.300413	0.111083	-600
0.315731	0.153639	-600
0.338869	0.0332938	-600
0.380232	0.0227464	-600
0.369384	-0.0776138	-600
0.333397	-0.0790383	-600
0.305731	-0.0379604	-600
0.305363	0.0243656	-600
0.293812	-0.0421932	-600
0.258496	0.0134543	-600
0.256561	-0.0334979	-600
0.251514	-0.0710961	-600
0.237448	-0.0393006	-600
0.22494	-0.0544161	-600
0.211697	-0.0229887	-600
0.169197	-0.0533937	-600
0.150384	-0.0959906	-600
0.159456	-0.18454	-600
0.170427	-0.213358	-600
0.1925	-0.237578	-600
0.166742	-0.299384	-600
0.241788	-0.20863	-600
0.238234	-0.10501	-600
0.23932	-0.129405	-600
0.250468	-0.14396	-600
0.255037	-0.161951	-600
0.344526	-0.249814	-600
0.282664	-0.430968	-600
0.258429	-0.364332	-600
0.215771	-0.330889	-600
0.285968	-0.354326	-600
0.202252	-0.353538	-600
0.224945	-0.37964	-600
0.275624	-0.249272	-600
0.293741	-0.257379	-600
0.0265743	0.38665	-600
0.0670471	0.233235	-560
0.0750076	0.206796	-560
0.0794267	0.0444754	-560
0.0998994	0.102419	-560
0.109777	0.119048	-560
0.107787	0.0884033	-560
0.120385	0.06568	-560
0.144507	0.112028	-560
0.164263	0.145286	-560
0.167216	0.122961	-560
0.192778	0.218678	-560
0.194	0.251029	-560
0.172476	0.298848	-560
0.261337	0.285539	-560
0.28243	0.31231	-560
0.295481	0.323644	-560
0.221578	0.188026	-560
0.247211	0.0679879	-560
0.201156	0.00899928	-560
0.196408	-0.0505718	-560
0.194718	-0.0766115	-560
0.21543	-0.0963217	-560
0.21548	-0.122725	-560
0.258611	-0.0274451	-560
0.36158	0.0138228	-560
0.221153	-0.184403	-560
0.155937	-0.118445	-560
0.177673	-0.257872	-560
0.187469	-0.283132	-560
0.214079	-0.347502	-560
0.0674509	-0.207659	-560
0.00348383	-0.095384	-560
0.00244829	0.0636186	-520
0.0394869	-0.00644399	-520
0.0574175	0.0202316	-520
0.0776132	0.0177128	-520
0.106132	0.0339409	-520
0.114054	0.0420915	-520
0.126297	0.05273	-520
0.13329	0.0807697	-520
0.0995605	-0.0489367	-520
0.135997	-0.0686965	-520
0.168235	0.00032207	-520
0.185473	0.00883003	-520
0.176298	0.143887	-520
0.17914	0.129837	-520
0.19815	0.162466	-520
0.185307	0.246246	-520
0.204595	0.198194	-520
0.235592	0.256721	-520
0.213026	0.131699	-520
0.215531	0.0431317	-520
0.190179	0.0432435	-520
0.297427	0.194224	-520
0.307884	0.0924759	-520
0.341736	0.0715191	-520
0.301837	0.0232292	-520
0.271103	-0.0505464	-520
0.253585	-0.0224881	-520
0.243575	-0.0410246	-520
0.231822	-0.0608628	-520
0.429444	-0.219435	-520
0.256512	-0.363742	-520
0.213899	-0.35082	-520
0.241986	-0.32388	-520
0.2115	-0.303343	-520
0.200528	-0.324798	-520
0.198538	-0.113028	-520
0.248732	-0.236466	-520
0.288349	-0.30532	-520
0.00661209	-0.0505257	-480
0.0786806	0.180574	-480
0.0937246	0.21823	-480
0.121091	0.235287	-480
0.0800776	0.258559	-480
0.0846771	0.0918426	-480
0.0947127	0.0576671	-480
0.107963	0.0863732	-480
0.121532	0.126177	-480
0.118486	0.0568252	-480
0.126697	0.0457625	-480
0.14912	0.0806723	-480
0.14999	0.19409	-480
0.174075	0.212356	-480
0.196544	0.207203	-480
0.203403	0.23188	-480
0.249562	0.30602	-480
0.240338	0.3479	-480
0.256296	0.297094	-480
0.223331	0.145958	-480
0.237473	0.102248	-480
0.185976	0.115007	-480
0.177623	0.108511	-480
0.18224	0.0795494	-480
0.174057	0.066582	-480
0.201591	0.077156	-480
0.139766	-0.0728556	-480
0.167119	-0.0397806	-480
0.191055	-0.0390722	-480
0.205476	-0.0316238	-480
0.220942	-0.0870439	-480
0.250289	-0.0835523	-480
0.237409	-0.157251	-480
0.231706	-0.187167	-480
0.250738	-0.200659	-480
0.263527	-0.200622	-480
0.273342	-0.180243	-480
0.292024	-0.17277	-480
0.267372	-0.115542	-480
0.273582	0.0647755	-480
0.284866	0.0990347	-480
0.317505	0.0852751	-480
0.31494	0.0285596	-480
0.320552	-0.0071674	-480
0.354063	-0.0693038	-480
0.382001	-0.135774	-480
0.405736	-0.0965434	-480
0.326365	-0.243234	-480
0.30897	-0.230352	-480
0.229416	0.333657	-440
0.127581	0.299971	-440
0.124243	0.233757	-440
0.11359	0.175144	-440
0.129874	0.147042	-440
0.107691	0.132734	-440
0.106827	0.110001	-440
0.116039	0.0699546	-440
0.0834623	0.103131	-440
0.060216	0.0749888	-440
0.043994	0.218114	-440
0.0576222	0.281114	-440
0.105385	0.0113284	-440
0.154564	0.0455249	-440
0.169859	0.0159778	-440
0.195962	-0.0328778	-440
0.231875	0.000145715	-440
0.18315	0.18881	-440
0.229679	0.211449	-440
0.248415	0.20383	-440
0.250288	0.125372	-440
0.247955	0.0836288	-440
0.258246	0.0804152	-440
0.31703	0.182403	-440
0.355098	0.163431	-440
0.403241	0.00150029	-440
0.430643	0.0265774	-440
0.310671	0.0197909	-440
0.270327	-0.0366331	-440
0.26727	-0.0763959	-440
0.310454	-0.142971	-440
0.364828	-0.144032	-440
0.282777	-0.194514	-440
0.255151	-0.279694	-440
0.250715	-0.303079	-440
0.25174	-0.35827	-440
0.288201	-0.295317	-440
0.221556	-0.293973	-440
0.3116	-0.345109	-440
0.322165	-0.321857	-440
0.325058	-0.352847	-440
0.342812	-0.338923	-440
0.334574	-0.320417	-440
0.338476	-0.429609	-440
0.357552	-0.4214	-440
0.312927	-0.453484	-440
0.291217	-0.450239	-440
0.064301	0.110492	-400
0.107758	0.0500501	-400
0.0968802	0.00909625	-400
0.0818744	0.0775449	-400
0.112941	0.103664	-400
0.116711	0.124787	-400
0.0957596	0.11385	-400
0.0885829	0.120128	-400
0.0885144	0.146237	-400
0.080968	0.166568	-400
0.0563349	0.224881	-400
0.0757539	0.246852	-400
0.116332	0.264032	-400
0.129043	0.24342	-400
0.150971	0.201823	-400
0.153867	0.178084	-400
0.162825	0.190231	-400
0.158777	0.148347	-400
0.179745	0.150592	-400
0.179335	0.119458	-400
0.193034	0.162784	-400
0.206919	0.199089	-400
0.191637	0.309375	-400
0.235206	0.330611	-400
0.239397	0.257688	-400
0.258779	0.17187	-400
0.255379	0.136694	-400
0.234149	0.104995	-400
0.172745	-0.0292369	-400
0.160826	-0.0541376	-400
0.198976	-0.0620785	-400
0.201918	-0.10322	-400
0.244648	-0.0816565	-400
0.252912	-0.0588153	-400
0.340211	-0.0772565	-400
0.351971	-0.116632	-400
0.382946	-0.0557084	-400
0.252574	-0.241233	-400
0.259127	-0.200327	-400
0.229703	-0.218389	-400
0.219242	-0.228213	-400
0.212903	-0.284849	-400
0.19471	-0.329894	-400
0.231308	-0.380708	-400
0.243857	-0.402994	-400
0.255203	-0.4109	-400
0.282151	-0.400569	-400
0.318945	-0.216732	-400
0.378693	-0.207041	-400
0.385783	-0.241103	-400
0.371807	-0.43038	-400
0.0496227	0.275512	-360
0.0323655	0.0505437	-360
0.0988542	0.17802	-360
0.11708	0.201702	-360
0.119794	0.158488	-360
0.143539	0.158186	-360
0.113593	0.0966061	-360
0.1394	0.0904727	-360
0.179734	0.141467	-360
0.184989	0.185132	-360
0.20106	0.19609	-360
0.200667	0.165839	-360
0.194827	0.142666	-360
0.20913	0.127265	-360
0.219258	0.140425	-360
0.199792	0.0868038	-360
0.18167	0.0377592	-360
0.177591	-0.00295293	-360
0.198536	0.276377	-360
0.229173	0.292115	-360
0.25772	0.278213	-360
0.256649	0.206009	-360
0.219024	0.199605	-360
0.292522	0.0982326	-360
0.290897	0.0380517	-360
0.248208	0.0250673	-360
0.241779	-0.065427	-360
0.234182	-0.158877	-360
0.117412	-0.181714	-360
0.195224	-0.257652	-360
0.26763	-0.211713	-360
0.291071	-0.0920299	-360
0.332149	0.0279153	-360
0.33048	0.0639988	-360
0.35354	0.0656237	-360
0.356368	-0.134661	-360
0.257351	-0.314307	-360
0.205069	-0.387911	-360
0.218687	-0.401373	-360
0.228618	-0.425295	-360
0.243117	-0.403626	-360
0.261212	-0.390027	-360
0.27301	-0.412938	-360
0.229135	-0.341056	-360
0.350604	-0.306444	-360
0.3474	-0.268121	-360
0.330969	-0.273887	-360
0.345828	-0.213509	-360
0.366049	-0.266546	-360
0.396104	-0.274244	-360
0.424212	-0.134316	-360
0.00698627	-0.0745086	-320
0.0300502	-0.0470686	-320
0.0652614	-0.0290201	-320
0.0846136	0.00470656	-320
0.0942394	-0.0119362	-320
0.135723	-0.0338034	-320
0.138068	-0.0199628	-320
0.136487	0.0476459	-320
0.14471	0.0838514	-320
0.139274	0.123458	-320
0.125487	0.0925896	-320
0.0853925	0.0697965	-320
0.0630955	0.115646	-320
0.0768576	0.179219	-320
0.076144	0.213812	-320
0.0774794	0.226392	-320
0.0814407	0.313208	-320
0.10497	0.212964	-320
0.116396	0.246339	-320
0.155623	0.293965	-320
0.17291	0.20093	-320
0.197334	0.216428	-320
0.174143	0.146535	-320
0.197943	0.114849	-320
0.289707	0.211718	-320
0.310906	0.0812742	-320
0.259191	0.0480809	-320
0.242421	-0.0356365	-320
0.222363	-0.0347605	-320
0.210118	-0.0923572	-320
0.219906	-0.107413	-320
0.166867	-0.161386	-320
0.115447	-0.150554	-320
0.25044	-0.133417	-320
0.241034	-0.16427	-320
0.246281	-0.1891	-320
0.230339	-0.256769	-320
0.286813	-0.0961758	-320
0.322746	-0.129077	-320
0.343123	-0.110449	-320
0.358195	-0.183043	-320
0.398326	-0.192971	-320
0.415254	-0.0995078	-320
0.385065	-0.251827	-320
0.227699	-0.314635	-320
0.240204	-0.345415	-320
0.0735418	0.302539	-280
0.0680422	0.267889	-280
0.0774861	0.242434	-280
0.0806337	0.161802	-280
0.0357137	0.122164	-280
0.00528867	0.0970439	-280
0.00837009	-0.0493651	-280
0.0443272	-5.14459e-07	-280
0.0873712	0.0817896	-280
0.10805	0.0961041	-280
0.115623	0.0694923	-280
0.114997	0.0402582	-280
0.10556	-0.0641428	-280
0.0835384	0.110689	-280
0.132462	-0.017146	-280
0.14477	-0.0400401	-280
0.143591	-0.11932	-280
0.18163	0.128515	-280
0.173918	0.153429	-280
0.17993	0.205225	-280
0.162195	0.259245	-280
0.137888	0.254717	-280
0.124026	0.226163	-280
0.147984	0.161533	-280
0.208216	0.355683	-280
0.215236	0.192465	-280
0.218449	0.00446254	-280
0.239648	-0.0506393	-280
0.242309	-0.0722468	-280
0.252509	-0.153355	-280
0.239438	-0.16138	-280
0.25164	-0.196363	-280
0.236328	-0.264302	-280
0.209533	-0.212635	-280
0.204758	-0.249239	-280
0.215031	-0.351146	-280
0.358997	-0.281857	-280
0.360452	-0.329061	-280
0.430575	-0.338851	-280
0.44862	-0.183464	-280
0.34202	-0.0670494	-280
0.0165647	0.141887	-240
0.0323319	-0.00276065	-240
0.00893085	-0.0502054	-240
0.0787599	0.0342189	-240
0.0918556	0.0460068	-240
0.108122	0.0918343	-240
0.0880282	0.119837	-240
0.0766863	0.134154	-240
0.119958	0.268006	-240
0.155948	0.123503	-240
0.16354	0.144892	-240
0.127894	0.072194	-240
0.117699	0.0381781	-240
0.176582	-0.0272706	-240
0.207297	-0.0279777	-240
0.212839	0.0021859	-240
0.191334	0.0222404	-240
0.239469	0.0322881	-240
0.253879	0.0636424	-240
0.254061	0.144813	-240
0.244356	0.183596	-240
0.262769	0.20903	-240
0.266359	0.236351	-240
0.293285	0.231573	-240
0.257487	-0.0134573	-240
0.238301	-0.0635636	-240
0.21847	-0.110207	-240
0.205786	-0.141986	-240
0.199945	-0.268209	-240
0.227662	-0.352723	-240
0.227629	-0.392501	-240
0.242254	-0.240198	-240
0.261737	-0.22496	-240
0.280987	-0.22625	-240
0.264682	-0.194176	-240
0.248255	-0.176989	-240
0.29208	-0.15265	-240
0.309525	-0.11539	-240
0.343785	-0.1418	-240
0.334466	-0.162776	-240
0.384869	-0.158247	-240
0.447368	-0.169869	-240
0.318726	-0.22698	-240
0.0296343	0.0317671	-200
0.0652227	0.00877125	-200
0.0349527	0.121351	-200
0.0708885	0.218422	-200
0.0721727	0.236972	-200
0.084618	0.199404	-200
0.101209	0.0938111	-200
0.118039	0.132338	-200
0.128916	0.0848851	-200
0.152035	0.0479643	-200
0.138108	0.0258399	-200
0.135489	0.000771768	-200
0.161727	0.0729046	-200
0.165722	0.0667119	-200
0.186298	0.0441978	-200
0.197459	-0.0119207	-200
0.142619	0.129379	-200
0.141359	0.162322	-200
0.137812	0.264519	-200
0.16411	0.209613	-200
0.187572	0.177755	-200
0.170057	0.154852	-200
0.180709	0.129755	-200
0.206863	0.136678	-200
0.202224	0.261483	-200
0.19504	0.400669	-200
0.205073	0.404923	-200
0.312077	0.109289	-200
0.319952	0.0952338	-200
0.230095	-0.0135508	-200
0.216941	-0.0118398	-200
0.213681	-0.0333146	-200
0.206426	-0.0485839	-200
0.214466	-0.0987374	-200
0.255408	-0.0699269	-200
0.292047	-0.0777386	-200
0.281407	-0.141913	-200
0.264885	-0.137612	-200
0.267479	-0.164038	-200
0.241082	-0.200087	-200
0.200984	-0.280617	-200
0.351969	-0.247824	-200
0.278308	-0.314477	-200
0.24387	-0.32611	-200
0.298566	-0.264825	-200
0.0518145	0.1831	-160
0.0650179	0.166959	-160
0.0701977	0.0485225	-160
0.0670971	0.0064696	-160
0.0284459	0.0230407	-160
0.0074081	-0.076163	-160
0.0940078	0.0670719	-160
0.0958534	0.118725	-160
0.114746	0.110542	-160
0.111647	0.0349911	-160
0.132757	0.0355869	-160
0.149243	0.0316882	-160
0.135539	-0.011587	-160
0.171096	-0.0702266	-160
0.145541	-0.105112	-160
0.115179	0.302062	-160
0.158353	0.237905	-160
0.167116	0.204208	-160
0.183215	0.192956	-160
0.178958	0.12884	-160
0.201042	0.164561	-160
0.194125	0.249911	-160
0.188155	0.286677	-160
0.190087	0.306685	-160
0.196168	0.338729	-160
0.220652	0.336655	-160
0.232241	0.406482	-160
0.225551	0.262943	-160
0.237103	0.198819	-160
0.282524	0.260632	-160
0.27237	0.117926	-160
0.31361	0.0504972	-160
0.218858	0.085922	-160
0.198217	0.0442872	-160
0.206883	0.00875496	-160
0.239844	-0.015788	-160
0.253533	-0.0394892	-160
0.282071	-0.0313468	-160
0.29431	-0.0323831	-160
0.292475	-0.0505555	-160
0.285521	-0.0991427	-160
0.268751	-0.10075	-160
0.266134	-0.133629	-160
0.301309	-0.199623	-160
0.271221	-0.220404	-160
0.251753	-0.206511	-160
0.277384	-0.253501	-160
0.257987	-0.338216	-160
0.248445	-0.335959	-160
0.22896	-0.37228	-160
0.214498	-0.380021	-160
0.17574	-0.398765	-160
0.266455	-0.410914	-160
0.405675	-0.335927	-160
0.127344	0.38513	-80
0.206444	0.381332	-80
0.211412	0.407134	-80
0.24694	0.374508	-80
0.202859	0.329329	-80
0.167681	0.29206	-80
0.186061	0.261762	-80
0.190571	0.239986	-80
0.231834	0.157616	-80
0.256766	0.266406	-80
0.187178	0.158541	-80
0.185598	0.12972	-80
0.1584	0.131893	-80
0.152426	0.157851	-80
0.139983	0.193413	-80
0.117174	0.183027	-80
0.095057	0.159553	-80
0.0859983	0.234329	-80
0.0890851	0.101045	-80
0.0556412	0.0943787	-80
0.0551406	0.0780387	-80
0.151349	0.0609027	-80
0.161169	0.0795021	-80
0.200819	0.0839976	-80
0.169337	0.0472708	-80
0.170729	0.0210799	-80
0.191496	-0.00271279	-80
0.23438	-0.00301855	-80
0.257768	0.00349525	-80
0.233144	-0.0595136	-80
0.247591	-0.0719065	-80
0.23388	-0.103839	-80
0.232604	-0.213563	-80
0.24717	-0.277406	-80
0.274179	-0.207906	-80
0.249711	-0.395819	-80
0.280652	-0.386443	-80
0.2993	-0.297489	-80
0.415349	-0.391323	-80
0.335284	-0.198056	-80
0.320261	-0.181791	-80
0.358905	-0.125535	-80
0.29861	0.0112297	-80
0.313482	0.035416	-80
0.318296	0.0594362	-80
0.306661	0.0726809	-80
0.316097	0.107944	-80
0.289131	0.133905	-80
0.34754	0.133674	-80
0.347038	0.11732	-80
0.378283	0.0457946	-80
0.1062	0.526056	0
0.0756193	0.274732	0
0.116978	0.26096	0
0.141112	0.275832	0
0.160565	0.190167	0
0.162725	0.169521	0
0.0639409	0.154388	0
0.00848516	0.0648747	0
0.0812821	0.114804	0
0.124671	0.078633	0
0.15153	0.105443	0
0.155362	0.0825099	0
0.126913	0.0343191	0
0.170059	0.0073069	0
0.192303	-0.028226	0
0.236299	0.0682313	0
0.199015	0.286408	0
0.21651	0.261335	0
0.242088	0.370394	0
0.278794	0.194233	0
0.277768	0.118116	0
0.281937	-0.0122553	0
0.324776	-0.0682897	0
0.37111	-0.114413	0
0.256111	-0.112141	0
0.253209	-0.151334	0
0.270881	-0.223747	0
0.292179	-0.209887	0
0.254938	-0.351961	0
0.252037	-0.391141	0
0.116109	0.388405	40
0.0617596	0.205851	40
0.057156	0.183433	40
0.124345	0.138195	40
0.162021	0.197248	40
0.162366	0.23405	40
0.154746	0.273588	40
0.183879	0.219283	40
0.19656	0.218614	40
0.218036	0.290609	40
0.20776	0.33106	40
0.236362	0.324935	40
0.272754	0.183203	40
0.26285	0.162607	40
0.23656	0.13103	40
0.182073	0.077753	40
0.16811	-0.00236873	40
0.176822	0.00385775	40
0.179143	-0.0227825	40
0.193014	-0.0201582	40
0.197273	-0.034543	40
0.211436	-0.0283313	40
0.219872	-0.00354283	40
0.234011	-0.0194782	40
0.254404	0.017826	40
0.277046	-0.0379511	40
0.2946	-0.0347483	40
0.322138	-0.0645207	40
0.334971	0.0565976	40
0.174801	-0.0748206	40
0.27816	-0.09002	40
0.25503	-0.0728535	40
0.283706	-0.132548	40
0.37071	-0.136596	40
0.346133	-0.213071	40
0.271922	-0.241105	40
0.237347	-0.175696	40
0.219307	-0.217482	40
0.214814	-0.271327	40
0.190575	-0.310997	40
0.390474	-0.368598	40
0.0566729	0.0283466	80
0.0840136	0.0792907	80
0.0642554	0.257065	80
0.0784901	0.197665	80
0.117646	0.160879	80
0.129044	0.218968	80
0.13775	0.267046	80
0.114189	0.26036	80
0.160481	0.328628	80
0.246749	0.305189	80
0.276479	0.114967	80
0.238072	0.0313268	80
0.231484	0.0080433	80
0.20629	0.00373686	80
0.19721	0.015872	80
0.156355	0.000428454	80
0.214246	-0.193769	80
0.205836	-0.367579	80
0.276126	-0.416612	80
0.256167	-0.284281	80
0.300313	-0.262651	80
0.269531	-0.203179	80
0.286293	-0.146887	80
0.282153	-0.12001	80
0.236454	0.372293	120
0.209856	0.251277	120
0.194762	0.232965	120
0.182958	0.154875	120
0.187223	0.122964	120
0.12203	0.14971	120
0.0945194	0.166652	120
0.135306	0.0952677	120
0.115222	0.111044	120
0.100341	0.103956	120
0.0617437	0.0406337	120
0.0244741	-0.000623171	120
0.119782	-0.0189934	120
0.161457	-0.026659	120
0.226051	-0.0041627	120
0.219143	-0.0804855	120
0.229955	-0.17727	120
0.274033	-0.0973475	120
0.277482	-0.164727	120
0.295479	-0.145724	120
0.314074	-0.175977	120
0.308511	-0.0832263	120
0.314402	0.0198993	120
0.274132	-0.408373	120
0.299669	-0.416969	120
0.0351128	0.0384147	160
0.126629	0.138594	160
0.176664	0.193526	160
0.192484	0.209643	160
0.254371	0.145379	160
0.393128	0.131814	160
0.212428	0.0424167	160
0.210009	0.0106707	160
0.20372	-0.030935	160
0.21126	-0.057479	160
0.238604	-0.0213863	160
0.270478	-0.00469671	160
0.268884	-0.0464666	160
0.309503	-0.018234	160
0.300055	-0.0719437	160
0.296543	-0.105131	160
0.261088	-0.253465	160
0.262814	-0.308314	160
0.28242	-0.291941	160
0.285752	-0.393842	160
0.183403	-0.338569	160
0.0862973	0.492985	200
0.0910832	0.368531	200
0.088823	0.231914	200
0.11418	0.153245	200
0.00524662	0.115387	200
0.162744	0.140327	200
0.197956	0.502817	200
0.233442	0.3922	200
0.197621	0.0641249	200
0.21268	0.037984	200
0.234264	0.110942	200
0.273058	0.0384688	200
0.294	-0.0323798	200
0.276742	-0.0651676	200
0.260325	-0.050151	200
0.24163	-0.121475	200
0.222693	-0.249854	200
0.217012	-0.326313	200
0.26582	-0.282159	200
0.27924	-0.225687	200
0.282412	-0.317773	200
0.303346	-0.388637	200
0.0435396	0.105405	240
0.110944	0.253549	240
0.141929	0.283944	240
0.1306	0.040901	240
0.174934	0.0486069	240
0.197402	0.112969	240
0.209754	0.0864703	240
0.190651	0.00618736	240
0.187696	-0.0950726	240
0.245503	-0.104201	240
0.261454	-0.0431648	240
0.284721	0.0152599	240
0.30108	0.050863	240
0.265215	0.143918	240
0.244864	0.0930453	240
0.236771	0.0566797	240
0.29001	-0.133609	240
0.29943	-0.214507	240
0.289103	-0.270202	240
0.257491	-0.331772	240
0.265977	-0.367672	240
0.306209	-0.381077	240
0.0733502	0.346642	280
0.0943107	0.31967	280
0.0720797	0.183385	280
0.0667443	0.139846	280
0.0885792	0.0505335	280
0.117052	0.070202	280
0.117359	-0.0239399	280
0.141048	0.0328903	280
0.169948	0.0336292	280
0.171038	0.0107317	280
0.141607	0.138065	280
0.129469	0.130416	280
0.157773	0.246063	280
0.167397	0.160416	280
0.185392	0.156891	280
0.198106	0.196337	280
0.218056	0.156486	280
0.184897	0.0893288	280
0.157223	0.0919906	280
0.175363	0.0658519	280
0.212721	0.088499	280
0.30375	0.194716	280
0.312545	-0.0975837	280
0.241871	-0.066966	280
0.249422	-0.264856	280
0.28115	-0.289428	280
0.092392	0.275678	320
0.111921	0.241421	320
0.120354	0.180739	320
0.0962134	0.229564	320
0.173157	0.248188	320
0.154768	0.216592	320
0.199378	0.144434	320
0.140521	0.131308	320
0.164168	0.121924	320
0.174813	0.0867487	320
0.158808	0.0263338	320
0.129428	0.0936606	320
0.000592887	0.0971021	320
0.241336	-0.0260416	320
0.221191	-0.0327549	320
0.279047	0.0929651	320
0.335013	0.208063	320
0.292254	0.0083253	320
0.298299	-0.0347586	320
0.291089	-0.242038	320
0.352303	-0.179125	320
0.220376	-0.380519	320
0.15046	0.236305	360
0.144463	0.103867	360
0.142217	0.0835942	360
0.155975	-0.00863789	360
0.268214	0.066477	360
0.271173	0.173677	360
0.282392	-0.0295244	360
0.26891	-0.094171	360
0.304207	-0.154185	360
0.323721	-0.172637	360
0.339822	-0.180515	360
0.389725	-0.194253	360
0.310606	-0.273092	360
0.0526314	0.0718921	400
0.0753809	0.0614045	400
0.13131	0.0245177	400
0.160963	0.138005	400
0.143006	0.282225	400
0.231117	0.241169	400
0.19799	0.110451	400
0.298854	-0.044058	400
0.397404	-0.168627	400
0.310708	-0.246729	400
0.225669	-0.283304	400
0.220658	-0.396889	400
0.181816	0.0495436	400
0.131943	0.262468	440
0.137231	0.188414	440
0.0988678	0.15656	440
0.103988	0.00192816	440
0.146476	-0.104885	440
0.0976375	-0.220684	440
0.217649	-0.391806	440
0.264554	-0.399412	440
0.329417	-0.254141	440
0.300604	-0.0916986	440
0.323318	-0.0835339	440
0.300153	-0.0207985	440
0.283966	0.0873921	440
0.0851768	0.40185	480
0.0737273	0.0119084	480
0.162058	0.231559	480
0.259175	0.200996	480
0.326962	0.155398	480
0.297083	0.0851694	480
0.281993	-0.0308344	480
0.290437	-0.0658053	480
0.301755	-0.225346	480
0.229791	-0.216581	480
0.21002	-0.326642	480
0.199348	-0.0863888	480
0.181483	-0.0522877	480
0.197145	-0.00253148	480
0.185678	0.0335235	480
0.255418	0.25729	560
0.186375	0.242059	560
0.103573	0.0521205	560
0.211087	0.0883766	560
0.31652	0.0682171	560
0.374513	-0.233797	560
0.361268	-0.205671	560
0.319318	-0.185529	560
0.29388	-0.246367	560
0.284504	-0.296511	560
0.248637	-0.29039	560
0.234399	-0.433855	560
0.124521	0.151769	600
0.203207	0.196475	600
0.261552	0.190232	600
0.22911	0.0419979	600
0.149574	-0.000764552	600
0.252234	-0.108259	600
0.280285	-0.0580007	600
0.300951	-0.0374504	600
0.371544	-0.175428	600
0.391554	-0.22539	600
0.395154	-0.239971	600
0.0290454	0.0152302	640
0.021725	0.168494	640
0.0317922	0.240446	640
0.0749078	0.38424	640
0.0998534	0.141857	640
0.162893	0.087506	640
0.22871	0.138508	640
0.255167	-1.75123e-05	640
0.362233	-0.152503	640
0.175911	0.357917	680
0.147842	0.104448	680
0.0799384	0.1311	680
0.028523	0.0301178	680
0.205851	-0.166821	680
0.278879	-0.169332	680
0.297555	-0.22542	680
0.251776	-0.352783	680
0.071963	0.126165	720
0.205563	-0.0431403	720
0.29279	-0.156121	720
0.346591	-0.0484146	720
0.344527	0.024356	720
0.363121	-0.273915	720
0.303533	-0.277641	720
0.312761	0.0860317	760
0.351978	0.0422908	760
0.322866	-0.0307855	760
0.269425	-0.0362663	760
0.36731	-0.269157	760
0.346136	-0.288596	760
0.130045	0.308766	800
0.144491	0.228703	800
0.139755	-0.010771	800
0.222562	-0.0468677	800
0.26749	0.135884	800
0.305367	0.0695137	800
0.293466	-0.162794	800
0.320666	-0.22267	800
0.316536	-0.295092	800
0.342276	-0.348013	800
0.224742	-0.371783	800
0.171573	0.260663	880
0.302164	0.253808	880
0.219925	0.0844981	880
0.183064	0.0701389	880
0.347867	-0.221598	880
0.0399902	0.238669	920
0.111241	0.223557	920
0.163393	0.250521	920
0.195027	0.201978	920
0.177926	0.139068	920
0.210271	0.0561715	920
0.289045	0.275204	920
0.353105	-0.027367	920
0.351207	-0.122013	920
0.340879	-0.361268	920
0.018818	0.11567	960
0.123336	0.260963	960
0.142069	0.0624517	960
0.285949	-0.119894	960
0.371061	-0.146397	960
0.344935	-0.22344	960
-0.154712	0.0179364	-2000
-0.0963773	-0.0727689	-2000
-0.0373666	-0.0666007	-2000
-0.0693518	-0.168136	-2000
-0.146912	-0.25601	-2000
-0.218078	-0.170411	-2000
-0.0790108	0.0320432	-1920
-0.0951977	-0.147005	-1920
-0.117789	-0.205902	-1920
-0.13984	-0.161809	-1920
-0.161119	-0.144685	-1920
-0.242476	-0.122846	-1920
-0.00613874	0.0931591	-1880
-0.0400903	-0.0251522	-1880
-0.0713065	0.0572298	-1880
-0.157664	-0.162201	-1880
-0.17825	-0.244182	-1880
-0.056431	-0.0257175	-1800
-0.0905418	-0.201832	-1800
-0.128383	-0.185642	-1800
-0.178754	-0.19124	-1800
-0.116986	-0.300014	-1800
-0.0585797	-0.0500373	-1760
-0.0718183	-0.123646	-1760
-0.103407	-0.188079	-1760
-0.134171	-0.204435	-1760
-0.155734	-0.239713	-1760
-0.181568	-0.202976	-1760
-0.124331	-0.00173893	-1720
-0.123644	-0.0283254	-1720
-0.05293	-0.0705776	-1720
-0.158296	-0.0750051	-1720
-0.167616	-0.136677	-1720
-0.0923921	-0.203274	-1720
-0.1539	-0.254825	-1720
-0.145015	-0.281703	-1720
-0.16013	-0.300092	-1720
-0.0670009	-0.180159	-1640
-0.111614	-0.119821	-1640
-0.168648	-0.14254	-1640
-0.176599	-0.20495	-1640
-0.309511	-0.00411369	-1600
-0.20321	-0.0869449	-1600
-0.165557	-0.0427681	-1600
-0.105048	-0.134938	-1600
-0.0717982	-0.0427056	-1600
-0.063043	-0.151378	-1600
-0.107199	-0.209733	-1600
-0.163	-0.0482711	-1560
-0.129935	-0.110596	-1560
-0.12595	-0.200695	-1560
-0.123337	-0.239317	-1560
-0.0568578	-0.118213	-1520
-0.0772371	-0.225597	-1520
-0.0960111	-0.21969	-1520
-0.161017	-0.175953	-1520
-0.167129	-0.240182	-1520
-0.171958	-0.272695	-1520
-0.200815	-0.235646	-1520
-0.0592171	-0.0815422	-1480
-0.0995327	-0.116194	-1480
-0.141919	-0.142884	-1480
-0.159471	-0.241131	-1480
-0.19483	-0.30391	-1480
-0.101846	-0.259846	-1480
-0.0594398	-0.198621	-1480
-0.0800581	-0.176055	-1480
-0.211198	0.220257	-1440
-0.127574	-0.0621274	-1440
-0.107323	-0.0939286	-1440
-0.067891	-0.162129	-1440
[truncated: 399 more rows]

## Sheet: Sheet2
0.351058	-0.267857	-560
0.361597	-0.0250603	-560
0.365112	-0.150414	-1160
0.365126	-0.229854	-520
0.370726	-0.185555	-1320
0.371819	-0.17067	-560
0.378233	-0.243723	-560
0.380798	-0.0480144	-1160
0.386584	-0.260156	-1000
0.388358	-0.138157	-1200
0.393937	-0.0401562	-640
0.394583	-0.17572	-1600
0.395654	-0.232035	-440
0.396651	-0.265178	-520
0.404314	-0.201167	-440
0.404435	-0.273373	-1120
0.406293	-0.297679	-400
0.407989	-0.242363	-440
0.413597	-0.260721	-1160
0.420083	-0.241262	-1120
0.430962	-0.219055	-440
0.433035	-0.24541	-1160
