# Supplementary material for: Spinal premotor interneurons controlling antagonistic muscles are spatially intermingled
Source: eLife. 2022 Dec 13;11:e81976. doi: 10.7554/eLife.81976 (PMC9844990; doi:10.7554/eLife.81976)
Supplement: Figure 12—figure supplement 12—source data 3. [file elife-81976-fig12-figsupp12-data3.xlsx]

## Sheet: Sheet1
0.0799369	-0.0494332	800
0.147923	0.0802167	800
0.152603	0.140194	800
0.198319	0.13816	800
0.206458	0.138128	800
0.195824	0.184251	800
0.220641	0.188535	800
0.233634	0.225829	800
0.21804	0.266281	800
0.240694	0.181042	800
0.217518	0.055716	800
0.232296	0.0471843	800
0.267084	0.0552663	800
0.286526	0.0901509	800
0.28383	-0.00519237	800
0.286299	-0.0843945	800
0.305198	-0.0718931	800
0.33101	-0.0484179	800
0.291057	-0.146393	800
0.381138	-0.214679	800
0.226563	-0.0982031	800
0.232001	-0.0626003	800
0.213892	-0.0663675	800
0.185853	-0.171805	800
0.216528	-0.241983	800
0.21955	-0.282252	800
0.0488127	-0.00682944	760
0.144003	-0.101747	760
0.186019	0.186894	760
0.183631	0.215454	760
0.158335	0.223944	760
0.157023	0.305847	760
0.18416	0.288591	760
0.201204	0.296985	760
0.209868	0.257503	760
0.212332	0.214833	760
0.227547	0.139039	760
0.284246	0.263259	760
0.310989	0.129181	760
0.335488	0.0109864	760
0.304331	-0.0076916	760
0.316064	-0.0308047	760
0.313277	-0.0725763	760
0.293097	-0.067764	760
0.231808	-0.084172	760
0.231153	-0.237562	760
0.274046	-0.303953	760
0.298516	-0.298219	760
0.0745159	0.157249	720
0.0527499	0.00300157	720
0.0367668	-0.00120103	720
0.148417	0.0256575	720
0.164594	-0.0306927	720
0.157268	-0.0646075	720
0.186898	0.019859	720
0.213027	0.0812735	720
0.178954	0.104454	720
0.174411	0.124749	720
0.08777	0.217477	720
0.159795	0.253199	720
0.188795	0.315015	720
0.179066	0.238862	720
0.188832	0.237031	720
0.196819	0.215605	720
0.217406	0.176648	720
0.225712	0.19007	720
0.206498	0.134485	720
0.228008	0.144957	720
0.260553	0.198909	720
0.291314	0.139149	720
0.276642	0.0632586	720
0.241403	0.0343968	720
0.251402	-0.0118756	720
0.2626	0.010019	720
0.323998	0.0223139	720
0.290441	-0.113308	720
0.239705	-0.0470614	720
0.258533	-0.144612	720
0.231798	-0.173559	720
0.200039	-0.281536	720
0.215825	-0.263815	720
0.223221	-0.291759	720
0.279161	-0.347604	720
0.299235	-0.360855	720
0.367845	-0.268907	720
0.0547514	0.0135082	640
0.0957177	0.0932738	640
0.100286	0.0707322	640
0.0807197	0.126796	640
0.098428	0.175914	640
0.0955181	0.213869	640
0.101022	0.244204	640
0.113894	0.237004	640
0.124226	0.286345	640
0.1185	-0.00798998	640
0.145174	0.129524	640
0.173114	0.151944	640
0.169368	0.213049	640
0.195167	0.323493	640
0.198697	0.308347	640
0.210027	0.300059	640
0.217335	0.236706	640
0.20196	0.214331	640
0.211739	0.167643	640
0.223091	0.134953	640
0.246288	0.139783	640
0.270928	0.205998	640
0.268579	0.104645	640
0.280238	0.0646977	640
0.250457	0.0857582	640
0.216568	0.050325	640
0.207202	0.0667697	640
0.251032	0.021036	640
0.275964	0.00539622	640
0.272647	-0.025443	640
0.218533	-0.0778427	640
0.160457	-0.159502	640
0.188796	-0.241935	640
0.206566	-0.303336	640
0.219446	-0.273225	640
0.225863	-0.301935	640
0.233762	-0.219039	640
0.2444	-0.176942	640
0.297295	-0.330913	640
0.315832	-0.342257	640
0.0287808	0.0441115	600
0.0899913	-0.0232871	600
0.115421	0.024641	600
0.118217	0.00569281	600
0.124418	0.0956661	600
0.144243	0.0951808	600
0.143248	0.0662616	600
0.156507	0.0663887	600
0.161481	0.12472	600
0.185146	0.160655	600
0.183687	0.212603	600
0.203656	0.205119	600
0.224243	0.187697	600
0.231833	0.207649	600
0.206433	0.151378	600
0.217395	0.116016	600
0.170387	0.0134326	600
0.184176	-0.00608815	600
0.219983	-0.000310279	600
0.231089	0.0436305	600
0.1934	-0.104953	600
0.157382	-0.164951	600
0.147899	-0.146745	600
0.19944	-0.301667	600
0.192451	-0.323194	600
0.245549	-0.261452	600
0.252004	-0.177121	600
0.265997	-0.185563	600
0.300489	-0.134837	600
0.341555	-0.04158	600
0.262853	-0.0843805	600
0.248925	-0.0578625	600
0.279441	0.0065965	600
0.290081	0.0882604	600
0.295541	0.143673	600
0.0300603	0.0471686	560
0.0761984	0.122511	560
0.0690869	0.163919	560
0.106977	0.263028	560
0.131349	0.209671	560
0.168103	0.337901	560
0.174259	0.281585	560
0.208825	0.246663	560
0.246598	0.308675	560
0.200335	0.196238	560
0.192196	0.174616	560
0.172978	0.167737	560
0.252989	0.150563	560
0.234218	0.127101	560
0.249126	0.0785239	560
0.242946	0.052347	560
0.201555	0.0158662	560
0.1804	0.0960233	560
0.170078	0.0638656	560
0.145929	0.0855487	560
0.16782	0.0286032	560
0.125514	-0.0104411	560
0.121111	-0.0204879	560
0.199516	-0.250438	560
0.245466	-0.30704	560
0.226751	-0.235662	560
0.227401	-0.213794	560
0.24644	-0.186256	560
0.233541	-0.176617	560
0.326163	-0.0438792	560
0.0494697	-0.00618424	520
0.0354372	0.104382	520
0.0911657	0.187991	520
0.116223	0.140858	520
0.130552	0.0548933	520
0.143099	0.0532851	520
0.150807	0.0917923	520
0.150578	0.0314772	520
0.151867	0.00768625	520
0.167868	0.0323421	520
0.187971	-0.0048442	520
0.197042	-0.00387318	520
0.177436	-0.0780483	520
0.165235	-0.0875452	520
0.155464	-0.117097	520
0.231336	-0.077543	520
0.258794	-0.115897	520
0.273196	-0.0632473	520
0.335173	-0.0641603	520
0.24649	-0.358697	520
0.333179	-0.344867	520
0.302791	0.0280584	520
0.281693	0.113626	520
0.250747	0.081811	520
0.232323	0.0264376	520
0.235292	0.0116875	520
0.220768	0.0812422	520
0.234373	0.0971056	520
0.24108	0.133214	520
0.223043	0.263009	520
0.199667	0.217594	520
0.186147	0.18797	520
0.164073	0.191511	520
0.200181	0.128185	520
0.0293263	0.00769842	480
0.121076	0.0216801	480
0.106283	0.0718052	480
0.13503	0.0714519	480
0.14769	0.0123081	480
0.165505	-0.0672468	480
0.135147	-0.22081	480
0.18899	-0.119529	480
0.199065	-0.274995	480
0.214808	-0.281655	480
0.237142	-0.0659944	480
0.168649	0.0671626	480
0.156879	0.0878578	480
0.159977	0.160817	480
0.0913499	0.251683	480
0.13385	0.298431	480
0.171668	0.230279	480
0.197239	0.247122	480
0.204728	0.187891	480
0.179498	0.16551	480
0.193303	0.152503	480
0.203707	0.113047	480
0.204345	0.0609891	480
0.229517	0.194001	480
0.213009	0.210414	480
0.22172	0.22872	480
0.249342	0.152183	480
0.260752	0.167095	480
0.266971	0.0904329	480
0.28162	0.0990611	480
0.301907	0.0939999	480
0.231729	0.112874	480
0.280356	0.0311083	480
0.266295	-0.0404938	480
0.284922	-0.0683524	480
0.295566	-0.0436982	480
0.297278	-0.0809975	480
0.31726	-0.03956	480
0.298484	-0.338025	480
0.372136	-0.299049	480
0.0287435	0.0131448	440
0.0444706	0.068142	440
0.0834273	0.182721	440
0.108426	0.0574769	440
0.112376	0.0966999	440
0.152159	0.110506	440
0.188288	0.126876	440
0.188188	0.149239	440
0.172615	0.189116	440
0.136817	0.238249	440
0.204842	0.229076	440
0.215379	0.193602	440
0.241219	0.317959	440
0.226553	0.141167	440
0.243468	0.130187	440
0.233853	0.0969644	440
0.248237	0.0686274	440
0.259471	0.0790016	440
0.207924	0.0884936	440
0.182082	0.073025	440
0.180603	-0.011662	440
0.182107	-0.0512194	440
0.222586	0.00842298	440
0.3087	-0.00792751	440
0.23982	-0.0850257	440
0.276649	-0.131696	440
0.238089	-0.187775	440
0.221139	-0.200499	440
0.22274	-0.262443	440
0.229243	-0.330131	440
0.256452	-0.355572	440
0.0341855	0.0229711	400
0.0536373	0.0157678	400
0.0787674	-0.00244905	400
0.0680708	0.0905946	400
0.110246	0.143263	400
0.0631993	0.214137	400
0.0765716	0.213647	400
0.100971	0.259538	400
0.126159	0.106201	400
0.138192	0.0913476	400
0.141551	-0.000466197	400
0.183676	0.227424	400
0.192823	0.213651	400
0.192793	0.197328	400
0.186007	0.180532	400
0.196144	0.169368	400
0.148889	0.166071	400
0.209104	0.228406	400
0.214564	0.270925	400
0.230338	0.128485	400
0.260912	0.0488769	400
0.29365	-0.0315457	400
0.32473	-0.12174	400
0.309424	-0.34174	400
0.266522	-0.330314	400
0.226672	-0.302185	400
0.240703	-0.231671	400
0.239839	-0.168988	400
0.225732	-0.0806303	400
0.175511	-0.0917266	400
0.206481	-0.0393451	400
0.00650597	-0.0326899	360
0.0468748	0.00808879	360
0.052291	0.027118	360
0.0762723	0.0330622	360
0.0744319	0.0766989	360
0.0849747	0.103738	360
0.0627502	0.180495	360
0.103732	0.196079	360
0.112644	0.141785	360
0.0939212	0.0577623	360
0.115986	0.0587826	360
0.112452	0.036358	360
0.167458	0.0292673	360
0.160345	0.119062	360
0.166595	0.139202	360
0.202285	0.137114	360
0.202382	0.162062	360
0.205606	0.197079	360
0.201478	0.231756	360
0.265488	0.370193	360
0.257202	0.168909	360
0.255589	0.151395	360
0.297241	0.126526	360
0.248002	0.0928406	360
0.223153	0.0774665	360
0.233339	0.0449576	360
0.196582	-0.0122787	360
0.197162	-0.133224	360
0.208727	-0.206444	360
0.145846	-0.300839	360
0.215241	-0.326567	360
0.237397	-0.332508	360
0.250938	-0.296744	360
0.263577	-0.31063	360
0.275365	-0.15076	360
0.298051	-0.143001	360
0.369916	-0.261147	360
0.387749	-0.250396	360
0.00689968	-0.0370531	320
0.0484201	0.0110213	320
0.0840338	0.079282	320
0.0921925	0.108997	320
0.0767448	0.207094	320
0.119189	0.231465	320
0.124373	0.111351	320
0.129457	0.053052	320
0.112961	0.00467452	320
0.168131	0.021259	320
0.203409	-0.000952451	320
0.217255	0.0443565	320
0.210454	0.119809	320
0.208557	0.148016	320
0.192633	0.242183	320
0.206698	0.251713	320
0.241974	0.329717	320
0.251911	0.305189	320
0.223275	0.250637	320
0.226462	0.220546	320
0.22145	0.185466	320
0.288165	0.178258	320
0.232622	-0.0042876	320
0.248454	0.00728735	320
0.225844	-0.0414136	320
0.248783	-0.0463822	320
0.288646	-0.0182432	320
0.28949	0.00750601	320
0.284965	-0.0799339	320
0.280401	-0.142647	320
0.298785	-0.166403	320
0.280998	-0.212897	320
0.150063	-0.296938	320
0.191813	-0.240705	320
0.208479	-0.247307	320
0.225463	-0.25129	320
0.237165	-0.273783	320
0.255759	-0.277018	320
0.25303	-0.33085	320
0.275335	-0.341058	320
0.284894	-0.331116	320
0.244215	-0.353453	320
0.00312559	-0.0715365	280
0.0477254	0.00618712	280
0.0517847	0.0224941	280
0.0617348	0.0289448	280
0.105044	0.116167	280
0.120908	0.120233	280
0.10285	0.160406	280
0.0874694	0.168103	280
0.120993	0.178518	280
0.133366	0.236325	280
0.147893	0.163186	280
0.163047	0.175021	280
0.16717	0.206252	280
0.174785	0.183743	280
0.182552	0.198568	280
0.191735	0.16196	280
0.218291	0.172192	280
0.234928	0.370343	280
0.233424	0.140667	280
0.204744	0.117837	280
0.184504	0.130485	280
0.16922	0.124688	280
0.148617	0.0836522	280
0.190459	0.0637931	280
0.232058	0.0559902	280
0.242249	0.0862723	280
0.244779	0.0523584	280
0.300705	0.034304	280
0.25152	-0.0789542	280
0.171346	-0.0496292	280
0.160468	-0.215698	280
0.220807	-0.2789	280
0.237824	-0.321646	280
0.257023	-0.336867	280
0.317095	-0.316217	280
0.0192047	0.086021	240
0.024428	0.0418622	240
0.0418499	0.00922088	240
0.0511447	0.0879751	240
0.076816	0.18429	240
0.117937	0.0246541	240
0.136825	0.0383082	240
0.149554	0.0576401	240
0.160724	0.0723666	240
0.136096	0.160877	240
0.136717	0.127002	240
0.15947	0.111923	240
0.179507	0.13711	240
0.195787	0.121144	240
0.195996	0.103578	240
0.190257	0.186946	240
0.188794	0.206452	240
0.173245	0.222064	240
0.222298	0.231817	240
0.203196	0.169915	240
0.208729	0.160511	240
0.166773	-0.0608345	240
0.113966	-0.0459384	240
0.109585	-0.0908067	240
0.166253	-0.096842	240
0.0598034	-0.175414	240
0.0986242	-0.254695	240
0.186185	-0.199181	240
0.190984	-0.264629	240
0.192446	-0.274742	240
0.234815	-0.323516	240
0.256417	-0.321928	240
0.324253	-0.369635	240
0.417659	-0.269952	240
0.289607	-0.115109	240
0.294515	-0.0342365	240
0.00577409	0.047057	160
0.0457957	0.0260011	160
0.0721054	0.0863489	160
0.0657911	0.112673	160
0.0502631	0.206595	160
0.0727463	0.202351	160
0.12928	0.223137	160
0.143238	0.208072	160
0.150283	0.198008	160
0.126493	0.153042	160
0.139137	0.153565	160
0.1494	0.133641	160
0.16087	0.144697	160
0.166793	0.121887	160
0.142227	0.0839478	160
0.17671	0.0821902	160
0.173685	0.0637167	160
0.162227	-0.0121409	160
0.183401	-0.0008107	160
0.141859	-0.0421508	160
0.176977	0.136892	160
0.182158	0.162623	160
0.185184	0.181096	160
0.18653	0.207022	160
0.177695	0.217954	160
0.186631	0.278419	160
0.203055	0.184063	160
0.216986	0.180637	160
0.209371	0.157749	160
0.194848	0.139859	160
0.206536	0.110931	160
0.261227	0.155874	160
0.229515	0.0566023	160
0.211802	0.0369333	160
0.216352	-0.000163068	160
0.2701	-0.0494611	160
0.212455	-0.147805	160
0.186944	-0.279997	160
0.200809	-0.313294	160
0.235962	-0.328666	160
0.24141	-0.248233	160
0.00955671	-0.0466461	120
0.0498761	0.00791604	120
0.0471848	0.0329924	120
0.0514961	0.0536104	120
0.0914522	-0.00666298	120
0.114552	0.0615038	120
0.136401	0.0632383	120
0.0554479	0.143006	120
0.0719217	0.194902	120
0.0737302	0.218215	120
0.131183	0.202568	120
0.150973	0.194813	120
0.151154	0.172423	120
0.164005	0.153662	120
0.163352	0.116171	120
0.16842	0.0953053	120
0.179012	0.0654185	120
0.187697	0.0911791	120
0.181695	0.199927	120
0.19789	0.19358	120
0.21409	0.211253	120
0.212503	0.261644	120
0.190169	0.359627	120
0.234043	0.292664	120
0.235643	0.266301	120
0.247766	0.201496	120
0.258494	0.188709	120
0.225752	0.110584	120
0.25762	0.0775141	120
0.213518	0.0467421	120
0.221671	0.00408619	120
0.211301	-0.051916	120
0.167324	-0.0895939	120
0.228242	-0.123763	120
0.253953	-0.113246	120
0.251286	-0.199717	120
0.278677	-0.182989	120
0.258967	-0.302254	120
0.19367	-0.297258	120
0.180335	-0.202802	120
0.0288704	0.0233776	80
0.0514709	0.0409931	80
0.067398	0.154956	80
0.0881642	0.0510818	80
0.0876532	0.0141599	80
0.104841	0.00103266	80
0.119793	0.000969289	80
0.115108	0.0333447	80
0.140926	0.0545865	80
0.156175	0.0976928	80
0.160943	0.114735	80
0.160209	0.148952	80
0.147101	0.140713	80
0.149287	0.200288	80
0.171973	0.202431	80
0.205531	0.225877	80
0.198786	0.175458	80
0.214898	0.193572	80
0.234022	0.189101	80
0.258856	0.161209	80
0.181221	0.128443	80
0.195245	0.00660465	80
0.185669	-0.0521992	80
0.129383	-0.0700416	80
0.158009	-0.130028	80
0.19853	-0.159768	80
0.21473	-0.189583	80
0.201718	-0.21331	80
0.250393	-0.188436	80
0.346127	-0.201539	80
0.345714	-0.318848	80
0.277012	-0.371411	80
0.274558	-0.319654	80
0.00589725	-0.0408204	40
0.00292783	-0.0761158	40
0.037305	0.0502998	40
0.0188732	0.0823502	40
0.0444935	0.117147	40
0.0638457	0.118112	40
0.0741235	0.123095	40
0.08647	0.123981	40
0.0962823	0.145094	40
0.113541	0.156534	40
0.110011	0.22815	40
0.0714329	0.0637964	40
0.0864372	0.07147	40
0.0897808	0.0572516	40
0.0995735	0.0847399	40
0.114979	0.0954135	40
0.122243	0.0778549	40
0.108166	0.0379448	40
0.123656	0.0231128	40
0.124808	-0.0140124	40
0.140046	0.0476724	40
0.140785	0.0728126	40
0.151108	0.0650411	40
0.158794	0.0441171	40
0.153927	0.0208093	40
0.136906	-0.0607744	40
0.174612	-0.00747467	40
0.177632	-0.0502065	40
0.186717	-0.119499	40
0.197369	-0.229291	40
0.208976	-0.253545	40
0.170881	0.0626308	40
0.174699	0.0911824	40
0.174992	0.126077	40
0.154112	0.152858	40
0.160962	0.197565	40
0.168286	0.22616	40
0.209561	0.195092	40
0.204019	0.127514	40
0.207064	0.0784043	40
0.216824	0.0533814	40
0.226319	0.0459884	40
0.237325	0.141387	40
0.267248	0.182229	40
0.260296	-0.0200422	40
0.251754	-0.0512639	40
0.235926	-0.0585721	40
0.276651	-0.172156	40
0.324181	-0.163009	40
0.00958836	0.0125495	0
0.0463154	0.0976801	0
0.0528699	0.132539	0
0.0735534	0.0961968	0
0.0549476	-0.00699576	0
0.0765424	0.0150636	0
0.0873994	0.0308064	0
0.100155	0.0722295	0
0.117085	0.00160149	0
0.110212	-0.0444992	0
0.0927662	-0.028666	0
0.13691	0.0909159	0
0.140499	0.0569517	0
0.150566	0.0654816	0
0.155195	0.141104	0
0.172486	0.14053	0
0.180458	0.163326	0
0.178413	0.194664	0
0.149011	0.259808	0
0.177512	0.261521	0
0.186669	0.253399	0
0.197138	0.307283	0
0.200324	0.227953	0
0.210512	0.245921	0
0.204543	0.174726	0
0.214926	0.152735	0
0.245919	0.227288	0
0.211404	0.0955551	0
0.195179	0.0557854	0
0.233377	-0.0457846	0
0.235111	-0.0883547	0
0.227165	-0.177608	0
0.283331	0.07674	0
0.300107	0.0631203	0
0.0331608	-0.006559	-40
0.0431743	-0.0232004	-40
0.0486265	0.01249	-40
0.0318953	0.0279137	-40
0.0395409	0.0447208	-40
0.0320039	0.064859	-40
0.0303976	0.0818102	-40
0.0170512	0.0954151	-40
0.0713009	0.12901	-40
0.0720559	0.159175	-40
0.0687163	0.2028	-40
0.0787547	0.0928283	-40
0.0859664	0.076087	-40
0.0824154	0.0458191	-40
0.104687	0.0354568	-40
0.112033	0.0765626	-40
0.116517	0.122417	-40
0.127079	0.0153743	-40
0.138667	0.00754198	-40
0.137912	-0.0226229	-40
0.139845	-0.0429608	-40
0.163857	-0.0124273	-40
0.169428	-0.1007	-40
0.193774	-0.00598256	-40
0.205591	0.0134103	-40
0.197146	0.038864	-40
0.179314	0.0532737	-40
0.193991	0.0679079	-40
0.18579	0.0739316	-40
0.181637	0.0922508	-40
0.162085	0.0866697	-40
0.172084	0.116683	-40
0.166127	0.145628	-40
0.15138	0.182517	-40
0.183487	0.170092	-40
0.188866	0.143063	-40
0.209226	0.173954	-40
0.205245	0.224357	-40
0.253596	0.282037	-40
0.234766	0.17149	-40
0.218254	0.146582	-40
0.223263	0.0811432	-40
0.241754	0.12752	-40
0.240359	0.104133	-40
0.320399	0.183393	-40
0.289061	0.132659	-40
0.261249	0.0237274	-40
0.262508	-0.0107422	-40
0.254869	-0.0275525	-40
0.220729	-0.0783866	-40
0.219897	-0.124598	-40
0.195975	-0.18575	-40
0.236788	-0.222164	-40
0.248535	-0.151248	-40
0.280986	-0.146165	-40
0.389165	-0.189814	-40
0.340424	-0.192587	-40
0.297953	-0.181026	-40
0.0152527	-0.0600982	-80
0.0791913	-0.0246775	-80
0.106641	0.00958766	-80
0.0980718	0.0876016	-80
0.0957453	0.120882	-80
0.071208	0.128803	-80
0.0400945	0.149364	-80
0.0740521	0.206463	-80
0.0812111	0.18548	-80
0.0970141	0.218597	-80
0.111442	0.0815319	-80
0.128711	0.0640271	-80
0.136693	0.0781242	-80
0.146358	0.0608426	-80
0.168189	0.029993	-80
0.133508	0.0102843	-80
0.119833	-0.033452	-80
0.130561	-0.0979431	-80
0.0935503	-0.168147	-80
0.166368	0.0904291	-80
0.167538	0.115686	-80
0.174253	0.157744	-80
0.174457	0.260781	-80
0.224728	0.294351	-80
0.19649	0.165381	-80
0.191382	0.127409	-80
0.193855	0.106957	-80
0.201358	0.118053	-80
0.208451	0.132554	-80
0.222363	0.135903	-80
0.231749	0.17676	-80
0.189914	0.0523537	-80
0.193269	0.0314898	-80
0.203994	0.0926886	-80
0.212904	0.00485517	-80
0.250152	0.0346719	-80
0.250015	0.0637397	-80
0.280894	0.0416655	-80
0.277022	-0.00653251	-80
0.308717	0.00647525	-80
0.206875	-0.140644	-80
0.25718	-0.166711	-80
0.268968	-0.152721	-80
0.208723	-0.260713	-80
0.00596702	-0.0440658	-120
0.00242365	-0.0730418	-120
0.0353882	0.0109433	-120
0.0460182	0.0208213	-120
0.0697465	0.145404	-120
0.0814429	0.132614	-120
0.0335511	0.158812	-120
0.0839258	0.184255	-120
0.0982672	0.129458	-120
0.0985966	0.202614	-120
0.118019	0.240025	-120
0.0906311	0.304792	-120
0.127768	0.202758	-120
0.144055	0.172426	-120
0.0935286	0.0572081	-120
0.108315	0.0644937	-120
0.113637	0.0813454	-120
0.131469	0.061052	-120
0.111054	-0.012408	-120
0.139853	-0.00286152	-120
0.164673	-0.0073424	-120
0.156921	0.0488513	-120
0.147286	0.0750335	-120
0.148939	0.127192	-120
0.153968	0.171737	-120
0.163303	0.0962286	-120
0.169159	0.0632212	-120
0.171664	0.138695	-120
0.172145	0.171413	-120
0.179292	0.223808	-120
0.189671	0.232011	-120
0.203341	0.214313	-120
0.212826	0.228569	-120
0.222368	0.237294	-120
0.200802	0.298429	-120
0.208106	0.310381	-120
0.199982	0.375978	-120
0.238769	0.195877	-120
0.268283	0.215979	-120
0.216537	0.163894	-120
0.222109	0.105398	-120
0.235571	0.133681	-120
0.247374	0.162999	-120
0.231113	0.0869353	-120
0.216478	0.0392118	-120
0.236312	0.037841	-120
0.264939	0.0640036	-120
0.277121	0.0307255	-120
0.283035	-0.00781289	-120
0.319246	0.0558068	-120
0.246498	-0.0143633	-120
0.231712	-0.021649	-120
0.239636	-0.0944588	-120
0.252389	-0.0767351	-120
0.213461	-0.169833	-120
0.207689	-0.11855	-120
0.315268	-0.348888	-120
0.00337035	0.059502	-160
0.0385432	0.060523	-160
0.0498972	0.0116782	-160
0.0792943	0.0478337	-160
0.111695	0.0712995	-160
0.10654	0.0963445	-160
0.086165	0.160226	-160
0.0573798	0.183023	-160
0.110591	0.222998	-160
0.125196	0.194248	-160
0.142627	0.197284	-160
0.15975	0.205369	-160
0.172331	0.251403	-160
0.158337	0.17797	-160
0.149994	0.145073	-160
0.138395	0.115096	-160
0.138761	0.0952141	-160
0.149928	0.0908362	-160
0.16362	0.0542301	-160
0.157603	0.0335762	-160
0.153428	-0.017407	-160
0.180559	0.129805	-160
0.186813	0.114199	-160
0.201054	0.128343	-160
0.214804	0.122953	-160
0.189578	0.183807	-160
0.20345	0.171797	-160
0.220205	0.176741	-160
0.221611	0.204131	-160
0.236404	0.199987	-160
0.245797	0.165066	-160
0.245426	0.138901	-160
0.296057	0.2029	-160
0.200993	0.0510911	-160
0.28323	0.0089836	-160
0.258623	0.0367255	-160
0.234873	0.0871321	-160
0.216462	-0.00100974	-160
0.183378	-0.045589	-160
0.202101	-0.0545716	-160
0.227448	-0.0529961	-160
0.250586	-0.0702924	-160
0.270224	-0.0483954	-160
0.231251	-0.212324	-160
0.203266	-0.221091	-160
0.209097	-0.248033	-160
0.214558	-0.278127	-160
0.215236	-0.326072	-160
0.252859	-0.342464	-160
0.311532	-0.332583	-160
0.328406	-0.288232	-160
0.330801	-0.336851	-160
0.167674	-0.348534	-160
0.19136	-0.176959	-160
0.222416	-0.103632	-160
0.200257	-0.116326	-160
-0.000119775	0.0460971	-200
0.0209518	0.0156672	-200
0.00651405	-0.0406099	-200
0.0421458	0.0197104	-200
0.0356821	0.0405778	-200
0.040491	0.0615283	-200
0.0674743	0.133789	-200
0.0725731	0.210515	-200
0.102345	0.228962	-200
0.0842033	0.0723418	-200
0.0776429	0.0455628	-200
0.0895998	0.0371395	-200
0.0891101	0.0537859	-200
0.0780027	-0.00556484	-200
0.0875129	-0.0112942	-200
0.103975	-0.054548	-200
0.0706003	-0.132274	-200
0.111693	0.034215	-200
0.10942	0.0582088	-200
0.123796	0.053685	-200
0.118278	0.134974	-200
0.160223	0.146547	-200
0.150899	0.0798483	-200
0.160481	0.0477859	-200
0.172543	0.080413	-200
0.159877	0.110516	-200
0.196571	0.185184	-200
0.226013	0.161023	-200
0.20669	0.116712	-200
0.195544	0.0705288	-200
0.188435	0.0867347	-200
0.166961	0.0203305	-200
0.16558	-0.0432002	-200
0.200499	-0.0483398	-200
0.222165	-0.0543658	-200
0.228132	0.0285688	-200
0.250065	0.00434971	-200
0.252442	-0.0591533	-200
0.336863	-0.240127	-200
0.322711	-0.234046	-200
0.375563	-0.17126	-200
0.247505	-0.282287	-200
0.188757	-0.286639	-200
0.170414	-0.283695	-200
0.122873	-0.268192	-200
0.0376154	0.0692837	-240
0.055299	0.0408785	-240
0.0763366	0.00425664	-240
0.0792708	0.0672392	-240
0.0727721	0.195904	-240
0.0540458	0.204988	-240
0.112037	0.190068	-240
0.0952241	0.0826146	-240
0.106187	0.0888594	-240
0.123662	0.0836819	-240
0.127963	0.063431	-240
0.134477	0.0520193	-240
0.11255	0.0147537	-240
0.103276	-0.0170757	-240
0.122163	-0.0311895	-240
0.144291	-0.0419247	-240
0.150953	-0.015429	-240
0.178442	0.0224271	-240
0.1543	0.0688183	-240
0.159372	0.109298	-240
0.158665	0.147632	-240
0.150729	0.167996	-240
0.146157	0.204893	-240
0.189344	0.114572	-240
0.203019	0.114551	-240
0.211714	0.130147	-240
0.212872	0.162613	-240
0.227034	0.215198	-240
0.213682	0.272868	-240
0.237337	0.173871	-240
0.244726	0.1868	-240
0.260999	0.167342	-240
0.275406	0.153751	-240
0.292715	0.153606	-240
0.220512	0.041658	-240
0.220659	0.0118589	-240
0.267374	0.0255242	-240
0.284806	0.038532	-240
0.206417	-0.0720646	-240
0.177282	-0.102521	-240
0.161142	-0.137632	-240
0.135821	-0.240946	-240
0.19457	-0.219906	-240
0.197823	-0.28424	-240
0.217061	-0.28366	-240
0.232669	-0.282981	-240
0.225705	-0.342358	-240
0.257026	-0.352603	-240
0.265494	-0.338535	-240
0.298257	-0.3082	-240
0.365931	-0.270013	-240
0.375662	-0.235093	-240
0.319328	-0.202812	-240
0.00160578	-0.051785	-280
0.0295527	-0.000227538	-280
0.0723355	0.0703585	-280
0.0983864	0.0589062	-280
0.106155	0.0363338	-280
0.109339	0.00780133	-280
0.119319	0.000217475	-280
0.120107	-0.0320506	-280
0.120673	-0.0658249	-280
0.106355	-0.0563336	-280
0.103473	0.0933809	-280
0.124551	0.0920896	-280
0.139983	0.0900952	-280
0.155831	0.0847206	-280
0.161332	0.109446	-280
0.172227	0.120617	-280
0.158208	0.163491	-280
0.143524	0.201868	-280
0.146829	0.217969	-280
0.133801	0.223696	-280
0.177708	0.138958	-280
0.195942	0.130942	-280
0.200528	0.224691	-280
0.223865	0.169745	-280
0.238299	0.2049	-280
0.248137	0.227708	-280
0.222828	0.106347	-280
0.215153	0.079392	-280
0.197977	0.0757714	-280
0.181937	0.0924015	-280
0.164228	0.0538972	-280
0.18065	0.0147561	-280
0.162773	-0.00612115	-280
0.186768	-0.0565661	-280
0.212209	-0.0533932	-280
0.219144	0.0249658	-280
0.244992	0.018392	-280
0.272628	0.0301896	-280
0.267272	-0.0249168	-280
0.24049	-0.0434723	-280
0.224459	-0.108254	-280
0.247751	-0.0945464	-280
0.321298	-0.0598388	-280
0.259945	-0.168551	-280
0.195718	-0.127541	-280
0.18389	-0.163841	-280
0.192449	-0.300091	-280
0.218112	-0.295412	-280
0.23401	-0.281651	-280
0.262234	-0.378652	-280
0.310899	-0.387281	-280
0.37153	-0.220791	-280
0.0013728	-0.0555098	-320
0.0240164	-0.00366689	-320
0.0272358	0.111601	-320
0.054987	0.00505691	-320
0.0688626	0.125953	-320
0.0725778	0.163792	-320
0.112798	0.144444	-320
0.102636	0.0390725	-320
0.123419	0.0608514	-320
0.136567	0.00532901	-320
0.132776	-0.0479284	-320
0.120067	-0.0629466	-320
0.155208	-0.0423122	-320
0.170024	-0.0470957	-320
0.160742	0.0770912	-320
0.149111	0.107932	-320
0.155399	0.122327	-320
0.160508	0.149266	-320
0.155365	0.196128	-320
0.187765	0.142465	-320
0.180988	0.250102	-320
0.190793	0.278408	-320
0.213821	0.288901	-320
0.240021	0.280851	-320
0.234844	0.238502	-320
0.217171	0.227374	-320
0.203343	0.217997	-320
0.211733	0.19029	-320
0.219663	0.166222	-320
0.237596	0.172086	-320
0.250559	0.159539	-320
0.213429	0.122625	-320
0.197007	0.0920817	-320
0.228548	0.038784	-320
0.243776	0.0595611	-320
0.233086	-0.0352782	-320
0.231938	-0.0965582	-320
0.249474	-0.0939458	-320
0.252118	-0.26498	-320
0.266006	-0.284808	-320
0.222924	-0.303661	-320
0.207579	-0.288356	-320
0.191315	-0.265773	-320
0.195955	-0.235215	-320
0.191754	-0.151	-320
0.215557	-0.363927	-320
0.344174	-0.216117	-320
0.0383545	-0.0454147	-360
0.0384256	0.00389138	-360
0.0475782	0.0190809	-360
0.0471486	0.0396645	-360
-0.00109968	-0.0744378	-360
0.0672644	0.0778432	-360
0.0520493	0.0581929	-360
0.0683641	0.152281	-360
0.063914	0.186323	-360
0.11433	0.100533	-360
0.117707	0.0328781	-360
0.112266	-0.0228671	-360
0.128651	-0.0172756	-360
0.135925	-0.123869	-360
0.151002	0.040459	-360
0.156527	0.145517	-360
0.186165	0.0320003	-360
0.186616	0.0845709	-360
0.184176	0.128047	-360
0.202012	0.138189	-360
0.19261	0.17754	-360
0.184755	0.206084	-360
0.209034	0.223952	-360
0.211287	0.178848	-360
0.222551	0.155786	-360
0.236225	0.18624	-360
0.255089	0.189176	-360
0.260491	0.236438	-360
0.241043	0.155467	-360
0.221343	0.129025	-360
0.243437	0.103499	-360
0.269391	0.136028	-360
0.294946	0.0921487	-360
0.222582	0.0587955	-360
0.234558	-0.0308929	-360
0.270152	-0.0599239	-360
0.263394	-0.0947551	-360
0.230734	-0.18594	-360
0.257356	-0.196204	-360
0.311665	-0.215444	-360
0.304038	-0.314593	-360
0.247584	-0.330252	-360
0.233114	-0.343391	-360
0.242068	-0.297498	-360
0.19472	-0.306471	-360
0.00368877	0.0459356	-400
0.0373588	0.00877658	-400
0.0551288	0.0602204	-400
0.0438664	0.0879097	-400
0.0674221	0.153296	-400
0.0565338	0.123498	-400
0.112597	0.170229	-400
0.126026	0.171107	-400
0.102314	0.0779499	-400
0.156501	0.158227	-400
0.168643	0.136719	-400
0.163368	0.0996423	-400
0.184425	0.0940143	-400
0.172165	0.0746305	-400
0.157874	0.0610227	-400
0.155676	0.0455749	-400
0.150385	0.0150575	-400
0.163506	-0.0396291	-400
0.179589	-0.0267671	-400
0.206361	0.0077778	-400
0.231813	0.0330455	-400
0.211347	0.0695422	-400
0.211786	0.159428	-400
0.195446	0.158145	-400
0.228796	0.158793	-400
0.235277	0.164242	-400
0.242836	0.183977	-400
0.261995	0.218457	-400
0.232865	-0.0263525	-400
0.246952	-0.0208469	-400
0.276055	-0.0233224	-400
0.280913	0.00410708	-400
0.219779	-0.0715988	-400
0.251825	-0.0867775	-400
0.252436	-0.149271	-400
0.330284	-0.21656	-400
0.362927	-0.200873	-400
0.381876	-0.0876915	-400
0.316117	-0.276079	-400
0.272447	-0.269094	-400
0.234718	-0.307197	-400
0.190594	-0.296738	-400
0.201214	-0.248814	-400
0.0466762	0.00599346	-440
0.0833975	0.0776825	-440
0.0981801	0.097994	-440
0.0949661	0.0622584	-440
0.110083	0.0654601	-440
0.122633	0.128308	-440
0.108088	0.135671	-440
0.0737524	0.22346	-440
0.11595	0.0291702	-440
0.136529	-0.00682614	-440
0.155989	-0.00536312	-440
0.150535	-0.0309494	-440
0.170078	-0.041853	-440
0.16102	0.049702	-440
0.155687	0.0703425	-440
0.165271	0.0927346	-440
0.179108	0.0933572	-440
0.191086	0.113251	-440
0.19827	0.138134	-440
0.170875	0.190754	-440
0.205625	0.105891	-440
0.229991	0.148584	-440
0.243746	0.161584	-440
0.247594	0.136906	-440
0.279941	0.119326	-440
0.211955	0.0339337	-440
0.230803	-0.0661611	-440
0.199622	-0.124643	-440
0.18612	-0.142375	-440
0.158699	-0.213156	-440
0.157469	-0.286708	-440
0.20989	-0.298439	-440
0.238594	-0.257482	-440
0.233671	-0.201513	-440
0.253536	-0.13234	-440
0.315966	-0.21595	-440
0.284784	-0.306822	-440
0.23935	-0.33645	-440
0.0101826	0.0570994	-480
0.0435461	0.00886402	-480
0.0567368	0.00557412	-480
0.0802882	0.0322192	-480
0.0915295	0.0394351	-480
0.075383	0.0696645	-480
0.110549	0.0269019	-480
0.113288	0.0494433	-480
0.124563	0.107606	-480
0.124962	0.155173	-480
0.160514	0.0979042	-480
0.153332	0.0536586	-480
0.165905	0.0634104	-480
0.172725	0.0377625	-480
0.172543	0.00282745	-480
0.143969	-0.0547965	-480
0.185741	0.134875	-480
0.186677	0.151933	-480
0.176966	0.171031	-480
0.223769	0.183075	-480
0.219722	0.146848	-480
0.201928	0.0823389	-480
0.230936	0.0298632	-480
0.267694	0.115312	-480
0.190533	-0.179588	-480
0.214899	-0.204296	-480
0.264374	-0.198345	-480
0.341602	-0.280867	-480
0.15999	-0.288787	-480
0.0762231	0.0495877	-520
0.0886284	0.0670099	-520
0.106496	0.0834359	-520
0.112892	0.0495402	-520
0.122353	0.0389646	-520
0.112053	0.0282833	-520
0.127833	0.109077	-520
0.108132	0.147616	-520
0.072418	0.175053	-520
0.143072	0.137555	-520
0.150988	0.161707	-520
0.170239	0.169759	-520
0.173507	0.145049	-520
0.180474	0.141809	-520
0.16993	0.129708	-520
0.197183	0.107749	-520
0.213922	0.133985	-520
0.216248	0.153006	-520
0.221402	0.193893	-520
0.237448	0.112226	-520
0.196403	0.0539994	-520
0.241296	0.0362213	-520
0.215366	0.0111716	-520
0.183642	0.0290123	-520
0.170583	0.0350852	-520
0.224732	-0.0163749	-520
0.256057	-0.0201236	-520
0.24736	-0.0980252	-520
0.205416	-0.0630594	-520
0.22067	-0.116535	-520
0.242581	-0.142185	-520
0.254923	-0.163385	-520
0.266178	-0.207282	-520
0.221287	-0.189494	-520
0.235288	-0.239299	-520
0.19192	-0.24541	-520
0.1926	-0.279746	-520
0.201604	-0.314855	-520
0.232039	-0.307361	-520
0.233704	-0.335969	-520
0.231504	-0.359681	-520
0.344214	-0.272948	-520
0.00727455	-0.0438656	-560
0.0379161	0.00903643	-560
0.0969394	0.0363563	-560
0.11658	0.0521156	-560
0.0945652	0.100771	-560
0.147013	0.0885254	-560
0.162283	0.214641	-560
0.181621	0.172448	-560
0.191717	0.153606	-560
0.197392	0.137208	-560
0.215163	0.173933	-560
0.221216	0.200487	-560
0.217468	0.303862	-560
0.197825	0.288092	-560
0.229664	0.157647	-560
0.237209	0.120282	-560
0.22116	0.0925779	-560
0.203764	0.0988176	-560
0.209199	0.0709228	-560
0.167355	0.0208641	-560
0.148939	-0.00387831	-560
0.17658	-0.0589477	-560
0.199871	-0.12656	-560
0.178568	-0.222792	-560
0.175944	-0.287788	-560
0.224042	-0.312577	-560
0.231908	-0.296978	-560
0.248879	-0.336209	-560
0.272395	-0.330879	-560
0.26637	-0.362438	-560
0.282282	-0.366213	-560
0.394613	-0.346633	-560
0.319929	-0.240768	-560
0.368028	-0.14766	-560
0.386786	-0.131404	-560
0.309905	0.0603646	-560
0.261116	-0.0722388	-560
0.250998	-0.109844	-560
0.22561	-0.0942181	-560
0.231816	-0.159081	-560
0.212825	-0.186838	-560
0.243975	-0.177398	-560
0.260646	-0.156675	-560
0.0797472	0.131077	-600
0.0405023	-0.0023054	-600
0.106812	-0.0098629	-600
0.109142	-0.0512185	-600
0.126568	-0.0366369	-600
0.135266	-0.0422665	-600
0.158031	-0.064748	-600
0.17006	-0.0475627	-600
0.169876	0.0157556	-600
0.165714	0.040752	-600
0.189126	0.0423902	-600
0.166115	0.0980339	-600
0.133106	0.0981579	-600
0.105861	0.135723	-600
0.116095	0.153774	-600
0.119466	0.193823	-600
0.200962	0.118587	-600
0.217769	0.121968	-600
0.233438	0.158962	-600
0.216246	0.106903	-600
0.233649	0.108563	-600
0.224826	0.036667	-600
0.247376	0.0602757	-600
0.265885	0.00679379	-600
0.271509	-0.0375848	-600
0.208756	-0.0576088	-600
0.324923	-0.0360538	-600
0.356075	-0.0697593	-600
0.376431	-0.0982663	-600
0.37118	-0.184819	-600
0.249273	-0.226593	-600
0.238712	-0.263163	-600
0.200349	-0.234601	-600
0.146925	-0.240438	-600
0.182591	-0.263398	-600
0.201166	-0.282415	-600
0.19808	-0.32978	-600
0.267931	-0.369222	-600
0.277245	-0.36366	-600
0.291004	-0.390418	-600
0.308097	-0.394353	-600
0.291152	-0.304271	-600
0.0581475	0.0415274	-640
0.0687279	0.103604	-640
0.0950839	0.0553221	-640
0.121972	0.0435005	-640
0.142885	0.040765	-640
0.138462	0.0720372	-640
0.137887	0.132004	-640
0.164061	0.10218	-640
0.166825	0.120705	-640
0.164032	0.13586	-640
0.178443	0.105747	-640
0.18866	0.0838469	-640
0.181533	0.121051	-640
0.212132	0.151771	-640
0.228562	0.155851	-640
0.217391	0.124673	-640
0.168134	0.0159897	-640
0.149391	-0.0236766	-640
0.198921	-0.0345028	-640
0.213614	-0.0632153	-640
0.228411	-0.0720921	-640
0.206549	-0.0933829	-640
0.262467	-0.0339104	-640
0.28344	-0.0121891	-640
0.294419	0.00837567	-640
0.296773	-0.0524746	-640
0.273272	-0.086719	-640
0.339179	-0.117915	-640
0.344253	-0.15563	-640
0.391274	-0.241729	-640
0.379125	-0.35506	-640
0.322339	-0.385015	-640
0.261986	-0.350458	-640
0.248152	-0.288496	-640
0.244424	-0.268277	-640
0.230987	-0.247837	-640
0.209187	-0.244662	-640
0.228018	-0.214228	-640
0.227851	-0.166701	-640
0.236914	-0.160493	-640
0.030671	0.025549	-680
0.0937455	0.0656298	-680
0.098659	0.0928053	-680
0.110926	0.10403	-680
0.146514	0.156741	-680
0.143869	0.18331	-680
0.123788	0.0465034	-680
0.150342	0.0544243	-680
0.156876	0.0339393	-680
0.142203	-0.000907785	-680
0.135675	-0.0421546	-680
0.169695	-0.0752694	-680
0.183731	-0.0233765	-680
0.182484	-0.0560156	-680
0.198755	-0.0638056	-680
0.222765	-0.0493949	-680
0.17854	0.0714002	-680
0.165044	0.0842551	-680
0.181176	0.106577	-680
0.178011	0.125093	-680
0.200995	0.118412	-680
0.259798	0.114268	-680
0.310713	-0.000405083	-680
0.362124	-0.0402942	-680
0.360308	-0.0709364	-680
0.260199	-0.0945046	-680
0.233511	-0.134045	-680
0.277841	-0.156476	-680
0.20812	-0.212715	-680
0.230359	-0.238983	-680
0.220576	-0.30337	-680
0.259086	-0.337428	-680
0.2186	-0.360605	-680
0.194958	-0.331855	-680
0.309081	-0.374828	-680
0.0767578	0.141621	-760
0.110233	0.161169	-760
0.112968	0.0710529	-760
0.137401	0.0217339	-760
0.151344	-0.0166054	-760
0.188738	-0.0100615	-760
0.217134	0.0100587	-760
0.200804	0.034869	-760
0.181483	0.101408	-760
0.169532	0.127572	-760
0.206367	0.113335	-760
0.233367	0.137295	-760
0.248923	0.172644	-760
0.269407	0.118548	-760
0.255971	0.0952171	-760
0.261789	0.0636124	-760
0.269339	-0.0285756	-760
0.350209	0.112889	-760
0.337223	-0.00765329	-760
0.328337	-0.0345554	-760
0.367979	-0.150257	-760
0.386988	-0.142268	-760
0.384306	-0.175078	-760
0.33713	-0.219456	-760
0.239354	-0.263082	-760
0.203887	-0.270455	-760
0.192201	-0.242791	-760
0.0767853	0.0759611	-800
0.0903561	0.0811605	-800
0.118722	0.0292575	-800
0.131815	-0.00758298	-800
0.143608	0.0302716	-800
0.167422	0.0688611	-800
0.161712	0.151164	-800
0.140617	0.144627	-800
0.129612	0.176839	-800
0.0644782	0.182857	-800
0.182307	0.0381421	-800
0.193319	0.0640653	-800
0.172205	-0.0393726	-800
0.162813	-0.0732101	-800
0.207631	-0.0738454	-800
0.213457	-0.0328558	-800
0.25146	0.00884837	-800
0.266387	0.152549	-800
0.301509	0.128818	-800
0.256559	-0.0713615	-800
0.224998	-0.0935393	-800
0.184953	-0.220524	-800
0.208123	-0.276748	-800
0.227451	-0.198802	-800
0.245451	-0.162437	-800
0.246677	-0.205371	-800
0.255435	-0.227593	-800
0.308639	-0.188584	-800
0.356103	-0.144799	-800
0.284635	-0.357477	-800
0.0259038	0.0348913	-840
0.0824667	-0.00976623	-840
0.0776309	0.127426	-840
0.0569448	0.165316	-840
0.0683292	0.188239	-840
0.125866	0.195961	-840
0.148406	0.0860481	-840
0.178763	-0.0022033	-840
0.192193	0.0536773	-840
0.209244	0.0127892	-840
0.200805	0.0979807	-840
0.187566	0.147081	-840
0.174969	0.164594	-840
0.206257	0.202239	-840
0.208979	0.254363	-840
0.21671	0.0992653	-840
0.227367	0.0767712	-840
0.240434	-0.00205603	-840
0.250634	0.0122625	-840
0.269349	0.0184065	-840
0.308775	0.161669	-840
0.345853	0.0392237	-840
0.389578	0.104883	-840
0.248109	-0.0591364	-840
0.268653	-0.0760128	-840
0.326923	-0.147154	-840
0.347257	-0.120242	-840
0.382303	-0.200391	-840
0.270846	-0.188337	-840
0.198402	-0.293734	-840
0.0709687	0.194255	-880
0.10715	0.229721	-880
0.0570128	0.0944469	-880
0.0502609	-0.0381687	-880
0.0463944	-0.0805245	-880
0.123095	0.12578	-880
0.12729	0.158167	-880
0.155247	0.123862	-880
0.158016	0.0571479	-880
0.158907	0.0387331	-880
0.176104	0.0928698	-880
0.189902	0.161672	-880
0.190598	0.274205	-880
0.211902	0.0598155	-880
0.193252	-0.00345951	-880
0.178078	-0.0568964	-880
0.193595	-0.0674103	-880
0.216126	-0.0337493	-880
0.19174	-0.0910729	-880
0.255069	-0.0470075	-880
0.261683	0.000606647	-880
0.294131	0.132684	-880
0.282771	-0.0108623	-880
0.337726	-0.0675764	-880
0.23159	-0.176728	-880
0.263834	-0.208125	-880
0.212529	-0.200548	-880
0.211333	-0.262149	-880
0.226129	-0.295223	-880
0.424943	-0.245658	-880
0.0434156	0.0109582	-920
0.0817557	0.0775267	-920
0.0943755	0.0420972	-920
0.10912	0.0115948	-920
0.14305	0.0121581	-920
0.122141	-0.0358526	-920
0.159227	0.0342523	-920
0.172913	0.0589877	-920
0.191336	0.0312254	-920
0.198644	0.00416647	-920
0.119421	0.113345	-920
0.16346	0.200938	-920
0.221087	0.0914066	-920
0.223856	0.131553	-920
0.256117	0.226078	-920
0.296961	0.0547932	-920
0.301818	0.0259138	-920
0.325024	-0.0218167	-920
0.257744	-0.0572303	-920
0.232242	-0.0705627	-920
0.261336	-0.0825581	-920
0.29157	-0.121711	-920
0.269826	-0.141227	-920
0.275783	-0.192803	-920
0.267322	-0.253977	-920
0.215359	-0.275775	-920
0.219708	-0.357668	-920
0.234241	-0.361442	-920
0.255269	-0.368225	-920
0.270134	-0.375109	-920
0.349095	-0.217876	-920
0.39282	-0.168598	-920
0.0441963	0.0166404	-960
0.0553304	0.108754	-960
0.0967211	0.0942601	-960
0.101314	0.0544928	-960
0.102747	0.0384343	-960
0.13598	0.116651	-960
0.152332	0.185784	-960
0.173585	0.109078	-960
0.184627	0.12435	-960
0.21398	0.177068	-960
0.157405	0.0347362	-960
0.141608	-0.024408	-960
0.183883	0.0495226	-960
0.190294	-0.0355282	-960
0.189363	-0.0607073	-960
0.220707	-0.0584807	-960
0.228926	0.0145085	-960
0.260755	0.0199151	-960
0.274123	0.0631264	-960
0.265886	0.0789886	-960
0.269773	0.104484	-960
0.286502	-0.128963	-960
0.298177	-0.141341	-960
0.268965	-0.180451	-960
0.257407	-0.22452	-960
0.221407	-0.238215	-960
0.242898	-0.313317	-960
0.384964	-0.201268	-960
0.213904	0.055798	-960
0.102966	0.0881441	-1000
0.152215	0.176637	-1000
0.186986	0.2662	-1000
0.20176	0.180243	-1000
0.21132	0.141169	-1000
0.249839	0.127041	-1000
0.234563	0.0641654	-1000
0.210265	-0.0107566	-1000
0.216206	-0.0427825	-1000
0.241747	-0.0854446	-1000
0.255737	-0.040517	-1000
0.271927	-0.0645433	-1000
0.281844	-0.052982	-1000
0.209097	-0.152441	-1000
0.21486	-0.223351	-1000
0.249488	-0.231975	-1000
0.215339	-0.296467	-1000
0.246062	-0.29959	-1000
0.296889	-0.164506	-1000
0.315146	-0.160864	-1000
0.34575	-0.0673258	-1000
0.39065	-0.12728	-1000
0.0796499	-0.0280239	-1040
0.0939303	0.0514253	-1040
0.122213	0.0791902	-1040
0.181719	0.147254	-1040
0.220279	0.118602	-1040
0.18609	0.0461579	-1040
0.196147	-0.0116858	-1040
0.209168	-0.0373935	-1040
0.211383	-0.068341	-1040
0.223082	-0.057373	-1040
0.242292	0.00224675	-1040
0.269443	-0.0420006	-1040
0.245014	-0.0771528	-1040
0.282287	-0.140046	-1040
0.323909	-0.123016	-1040
0.359579	-0.0344929	-1040
0.373411	-0.203791	-1040
0.268727	-0.176012	-1040
0.261369	-0.21717	-1040
0.201158	-0.218606	-1040
0.145597	-0.235269	-1040
0.184099	-0.30312	-1040
0.215832	-0.311264	-1040
0.222312	-0.275828	-1040
0.24927	-0.301913	-1040
0.0388385	0.15248	-1080
0.0941568	0.0770069	-1080
0.104263	0.143885	-1080
0.0990846	0.236597	-1080
0.0681754	-0.087541	-1080
0.147746	0.233122	-1080
0.166087	0.14779	-1080
0.157935	0.12261	-1080
0.14943	0.00967744	-1080
0.182837	0.0238857	-1080
0.201347	0.0247379	-1080
0.22018	0.0791976	-1080
0.238981	-0.0192982	-1080
0.198565	-0.0915661	-1080
0.185139	-0.245302	-1080
0.224325	-0.28493	-1080
0.278293	-0.286766	-1080
0.308545	-0.392007	-1080
0.349529	-0.153946	-1080
0.344627	-0.118273	-1080
0.288426	-0.143413	-1080
0.301674	-0.0335644	-1080
0.320892	0.0240252	-1080
0.358443	-0.00371502	-1080
0.3845	-0.0165558	-1080
0.403131	-0.0401409	-1080
0.382362	-0.102139	-1080
0.0393011	0.00254049	-1120
0.0702338	-0.00209982	-1120
0.0999971	0.0585164	-1120
0.116814	0.0885385	-1120
0.136092	0.136264	-1120
0.154591	0.0832817	-1120
0.162142	0.106651	-1120
0.179084	0.101694	-1120
0.187787	0.0546009	-1120
0.202692	0.0595951	-1120
0.172372	0.00629675	-1120
0.188093	-0.00490797	-1120
0.205342	-0.00829382	-1120
0.25029	0.053663	-1120
0.234318	-0.0483917	-1120
0.266339	-0.0118123	-1120
0.30114	-0.0170354	-1120
0.361714	-0.0482072	-1120
0.276443	-0.138267	-1120
0.301218	-0.184565	-1120
0.251057	-0.0950876	-1120
0.242077	-0.105398	-1120
0.233378	-0.119351	-1120
0.178579	-0.124799	-1120
0.200966	-0.234215	-1120
0.218673	-0.204728	-1120
0.262737	-0.32542	-1120
0.234267	-0.364134	-1120
0.288328	-0.387917	-1120
-0.0137519	0.0608936	-1160
0.0326532	0.0460669	-1160
0.0859832	0.107181	-1160
0.147199	0.0520053	-1160
0.14883	0.0755168	-1160
0.167308	0.064106	-1160
0.198681	0.078358	-1160
0.230567	0.105338	-1160
0.241225	0.0184494	-1160
0.217096	-0.0142622	-1160
0.216173	-0.0543837	-1160
0.216554	-0.0675847	-1160
0.194822	-0.0576979	-1160
0.234588	-0.147004	-1160
0.249494	-0.111031	-1160
0.265038	-0.127381	-1160
0.279237	-0.12029	-1160
0.260278	-0.0355105	-1160
0.271769	-0.0220926	-1160
0.307963	-0.0185224	-1160
0.320951	-0.0530242	-1160
0.361486	-0.0322489	-1160
0.319355	-0.126905	-1160
0.284346	-0.220475	-1160
0.225645	-0.324236	-1160
0.227595	-0.349633	-1160
0.24451	-0.348851	-1160
0.270713	-0.361106	-1160
0.305596	-0.384453	-1160
0.110418	0.0911705	-1200
0.0932648	0.141318	-1200
0.137264	0.194064	-1200
0.198802	0.252717	-1200
0.149399	0.10302	-1200
0.189035	0.146001	-1200
0.1877	0.110186	-1200
0.164021	0.0489621	-1200
0.200934	0.0600222	-1200
0.212054	0.0289207	-1200
0.224519	0.0270233	-1200
0.245947	0.0528146	-1200
0.28215	0.0724298	-1200
0.285482	0.00820566	-1200
0.23359	-0.0180999	-1200
0.22902	-0.0492619	-1200
0.177045	-0.0159909	-1200
0.254527	-0.129345	-1200
0.242993	-0.134454	-1200
0.220957	-0.217859	-1200
0.255872	-0.26054	-1200
0.224315	-0.301938	-1200
0.0342152	-0.0514324	-1240
0.00998772	0.00912684	-1240
0.00700524	0.0221172	-1240
0.136843	0.0319659	-1240
0.142728	0.0461925	-1240
0.148693	0.0202118	-1240
0.182683	-0.0327988	-1240
0.143795	0.0808879	-1240
0.161277	0.0951846	-1240
0.166304	0.082995	-1240
0.181279	0.100036	-1240
0.181822	0.0562837	-1240
0.167768	0.147663	-1240
0.217558	0.26701	-1240
0.270404	5.27429e-05	-1240
0.270288	-0.055135	-1240
0.312324	-0.0379305	-1240
0.324071	-0.111574	-1240
0.253722	-0.185319	-1240
0.307489	-0.235067	-1240
0.291223	-0.288382	-1240
0.242603	-0.311145	-1240
0.237418	-0.334039	-1240
0.214487	-0.352705	-1240
0.282953	-0.360175	-1240
0.00191154	-0.0526756	-1280
0.0819337	0.142261	-1280
0.109171	0.226739	-1280
0.12389	0.0711594	-1280
0.157831	0.0533191	-1280
0.193323	0.12946	-1280
0.155079	0.00675183	-1280
0.166563	-0.00520786	-1280
0.207146	-0.0255634	-1280
0.191205	-0.126717	-1280
0.247757	-0.0218103	-1280
0.270816	0.0266383	-1280
0.280517	0.0238429	-1280
0.276446	0.0762519	-1280
0.294518	0.0135464	-1280
0.286946	-0.00750983	-1280
0.294809	-0.0413488	-1280
0.304018	-0.150065	-1280
0.307927	-0.183068	-1280
0.320639	-0.218309	-1280
0.273433	-0.179358	-1280
0.249845	-0.217825	-1280
0.237768	-0.252166	-1280
0.276289	-0.340441	-1280
0.284855	-0.239554	-1280
0.140777	0.0101484	-1320
0.158866	0.0240189	-1320
0.192719	0.0180662	-1320
0.204608	0.118516	-1320
0.171582	0.198932	-1320
0.145075	0.182178	-1320
0.265496	0.0193772	-1320
0.300014	0.011353	-1320
0.317971	0.0810043	-1320
0.318203	-0.0496893	-1320
0.330719	-0.052266	-1320
0.27852	-0.061809	-1320
0.298852	-0.18483	-1320
0.243134	-0.147388	-1320
0.221014	-0.281176	-1320
0.327358	-0.256095	-1320
0.399406	-0.240508	-1320
0.421217	-0.177948	-1320
0.0527139	0.000166202	-1360
0.082175	0.0938857	-1360
0.136715	0.111052	-1360
0.163803	0.130526	-1360
0.214974	0.241252	-1360
0.218896	0.0970334	-1360
0.148485	-0.0158431	-1360
0.228475	-0.0430742	-1360
0.275537	0.0968633	-1360
0.302353	0.0247547	-1360
0.329438	-0.00973358	-1360
0.309736	-0.12855	-1360
0.296603	-0.207753	-1360
0.258574	-0.239268	-1360
0.254923	-0.29125	-1360
0.0616325	-0.021372	-1400
0.0983933	0.168682	-1400
0.168273	0.0285779	-1400
0.177523	0.0589572	-1400
0.246077	0.0118294	-1400
0.252671	-0.0503704	-1400
0.24442	-0.090787	-1400
0.252225	-0.112218	-1400
0.265266	-0.098066	-1400
0.321519	-0.0562578	-1400
0.23657	-0.303313	-1400
0.0265006	-0.0675094	-1440
0.0966785	0.0388161	-1440
0.112675	0.0247153	-1440
0.126995	0.0607554	-1440
0.184804	0.0485274	-1440
0.200634	0.0480972	-1440
0.177772	-0.0747288	-1440
0.213979	-0.0645986	-1440
0.235247	-0.0596157	-1440
0.273898	-0.0576451	-1440
0.302822	-0.0179763	-1440
0.29622	-0.0719311	-1440
0.336045	-0.0791	-1440
0.361673	-0.25638	-1440
0.381996	-0.250876	-1440
0.284701	-0.229975	-1440
0.244418	-0.119067	-1440
0.222577	-0.323882	-1440
0.111815	0.231395	-1480
0.147418	0.182199	-1480
0.165767	0.141772	-1480
0.183756	0.0998577	-1480
0.207744	0.191959	-1480
0.142638	0.107671	-1480
0.133646	0.0425796	-1480
0.15578	0.0136205	-1480
0.177283	0.00913958	-1480
0.18173	0.0460171	-1480
0.200397	-0.00664397	-1480
0.235175	-0.100089	-1480
0.243551	-0.132717	-1480
0.226939	-0.14842	-1480
0.21197	-0.161687	-1480
0.287075	-0.121337	-1480
0.29935	-0.101275	-1480
0.310154	-0.15087	-1480
0.316476	-0.115134	-1480
0.341757	-0.244102	-1480
0.287114	-0.193642	-1480
0.283214	-0.246342	-1480
0.0228545	0.0794148	-1520
0.0336373	0.151688	-1520
0.0893664	0.104281	-1520
0.13005	0.101564	-1520
0.163178	0.133749	-1520
0.237535	0.119979	-1520
0.198192	0.0324831	-1520
0.203713	-0.0172988	-1520
0.239393	-0.0492198	-1520
0.24987	-0.0751195	-1520
0.264199	-0.0621682	-1520
0.261958	-0.0983887	-1520
0.272647	-0.102951	-1520
0.313514	-0.0539123	-1520
0.29819	-0.203966	-1520
0.35702	-0.256802	-1520
0.394067	-0.277022	-1520
0.262826	-0.206209	-1520
0.253001	-0.309452	-1520
0.256795	-0.342107	-1520
0.294959	-0.377304	-1520
0.0712677	0.224579	-1600
0.117357	0.106773	-1600
0.154182	0.139058	-1600
0.1922	0.189992	-1600
0.164438	0.0940689	-1600
0.130458	0.0459683	-1600
0.153187	0.0339452	-1600
0.171503	0.0175535	-1600
0.161356	-0.0150495	-1600
0.188135	-0.0700474	-1600
0.226666	-0.0123798	-1600
0.271634	0.0396354	-1600
0.247538	-0.0549896	-1600
0.320097	-0.215266	-1600
0.344705	-0.265438	-1600
0.291424	-0.273642	-1600
0.257437	-0.298831	-1600
0.234957	-0.336294	-1600
0.278091	-0.360693	-1600
0.0731052	0.286126	-1640
0.137743	0.127217	-1640
0.194867	-0.00555193	-1640
0.217451	-0.00164058	-1640
0.271728	0.0111034	-1640
0.339924	-0.117731	-1640
0.391858	-0.195563	-1640
0.295327	-0.238148	-1640
0.00760656	0.0372125	-1680
0.143946	0.0851789	-1680
0.163562	0.0698826	-1680
0.207458	0.0496183	-1680
0.169445	0.151766	-1680
0.228542	0.21297	-1680
0.250859	-0.19893	-1680
0.276848	-0.248563	-1680
0.322462	-0.299434	-1680
0.330799	-0.200997	-1680
0.337667	-0.126566	-1680
0.193232	-0.327541	-1680
0.147927	0.0734801	-1720
0.224116	0.212952	-1720
0.230488	-0.158015	-1720
0.287783	-0.282645	-1720
0.307572	-0.358062	-1720
0.361331	-0.215495	-1720
0.253796	0.142121	-1760
0.152683	0.15138	-1760
0.162154	0.0964706	-1760
0.150013	0.0326338	-1760
0.138046	0.0511568	-1760
0.0628777	-0.000929022	-1760
0.178101	-0.15703	-1760
0.225014	-0.259321	-1760
0.282445	-0.277235	-1760
0.0407691	0.0856565	-1800
0.189827	0.0536341	-1800
0.216183	-0.0982939	-1800
0.307456	-0.0615376	-1800
0.211519	-0.232768	-1800
0.297924	-0.314178	-1800
0.0148696	0.147739	-1840
0.0390364	0.0668899	-1840
0.0133299	0.028783	-1840
0.203388	-0.240337	-1840
0.297053	-0.322381	-1840
0.333147	-0.324651	-1840
0.140831	-0.0873072	-1880
0.184868	-0.0117974	-1880
0.222873	-0.210099	-1880
0.278705	-0.2455	-1880
[truncated: 340 more rows]

## Sheet: Sheet2
0.331839	-0.132547	160
0.311934	-0.0844846	120
0.312179	-0.122339	120
0.350836	-0.192354	40
0.351926	-0.0809487	0
0.322706	-0.0975072	0
0.299849	-0.122763	0
0.317762	-0.152314	-80
0.324788	-0.186119	-80
0.321216	-0.156348	-120
0.300996	-0.0923776	-120
0.283457	-0.0997774	-120
0.269994	-0.12806	-120
0.28319	-0.17848	-120
0.269979	-0.127218	-160
0.29588	-0.18998	-160
0.338874	-0.241553	-280
