# Supplementary material for: Spinal premotor interneurons controlling antagonistic muscles are spatially intermingled
Source: eLife. 2022 Dec 13;11:e81976. doi: 10.7554/eLife.81976 (PMC9844990; doi:10.7554/eLife.81976)
Supplement: Figure 12—figure supplement 13—source data 1. — The x-y coordinates are normalized (between –0.5 and 0.5) and scaled to an idealized spinal cord of dimensions 1700 μm and 900 μm in the mediolateral and dorsoventral directions respectively, while z coordinates are in micron, with the axis origin taken at the border between L4 and L5 and negative values in the rostral direction. [file elife-81976-fig12-figsupp13-data1.xlsx]

## Sheet: Sheet 1
0.108086	0.006469	-3420
0.0734889	0.0324459	-3420
0.104924	0.0287494	-3420
0.0377752	0.0633698	-3420
0.156957	0.00833282	-3420
0.185773	0.0229327	-3420
0.23413	0.00217445	-3420
0.210963	0.0249286	-3420
0.0405063	0.112831	-3420
0.0970724	0.0922745	-3420
0.0166401	0.129978	-3420
0.141352	0.0712832	-3420
0.224865	0.0402429	-3420
0.0279965	0.133426	-3420
0.267812	0.0153765	-3420
0.0743001	0.113576	-3420
0.310797	0.0139398	-3420
0.0774331	0.139281	-3420
0.251708	0.0516122	-3420
0.101136	0.13049	-3420
0.0285249	0.164505	-3420
0.159964	0.110012	-3420
0.342603	0.0203234	-3420
0.138338	0.12625	-3420
0.120232	0.140151	-3420
0.374812	0.0191197	-3420
0.168745	0.131485	-3420
0.0505455	0.206286	-3420
0.350455	0.0510608	-3420
0.10505	0.186234	-3420
0.275373	0.093882	-3420
0.296173	0.0882983	-3420
0.0848527	0.202612	-3420
0.378771	0.0568387	-3420
0.22613	0.142675	-3420
0.123692	0.204422	-3420
0.114286	0.22007	-3420
0.288903	0.132051	-3420
0.253628	0.155132	-3420
0.305565	0.135057	-3420
0.107268	0.256764	-3420
0.314123	0.154161	-3420
0.0333621	0.302086	-3420
0.115	0.272521	-3420
0.174729	0.280621	-3420
0.194405	0.273795	-3420
0.218204	-0.312005	-3420
0.105214	-0.18694	-3420
0.201855	-0.240807	-3420
0.248873	-0.201791	-3420
0.151361	-0.0441973	-3420
0.267902	-0.122732	-3420
0.298242	-0.139772	-3420
0.27032	-0.0931627	-3420
0.144455	-0.00244548	-3420
0.197523	-0.0319364	-3420
0.23061	-0.0501156	-3420
0.242599	-0.0528961	-3420
0.327883	-0.0932744	-3420
0.271764	-0.0298482	-3420
0.343251	-0.0116914	-3420
-0.357251	0.0933659	-3420
-0.39075	0.158927	-3420
-0.142557	0.0708237	-3420
-0.060448	0.0236393	-3420
-0.21373	0.239307	-3420
-0.170166	-0.275414	-3420
-0.221236	-0.21698	-3420
-0.253601	-0.174672	-3420
-0.144684	-0.241096	-3420
-0.175532	-0.2078	-3420
-0.215927	-0.176847	-3420
-0.167189	-0.189018	-3420
-0.136058	-0.207456	-3420
-0.216005	-0.129157	-3420
-0.148334	-0.166358	-3420
-0.158874	-0.12041	-3420
-0.197051	-0.0778759	-3420
-0.173653	-0.0842418	-3420
-0.0925787	-0.0970424	-3420
-0.00276439	-0.150331	-3420
0.0474661	0.00747104	-3360
0.14005	0.0154707	-3360
0.120424	0.0404416	-3360
0.173843	0.0347664	-3360
0.165778	0.0301174	-3360
0.193169	0.0218456	-3360
0.0894941	0.0934463	-3360
0.171802	0.0649304	-3360
0.296979	0.00556635	-3360
0.0528258	0.134339	-3360
0.0400939	0.138381	-3360
0.136632	0.0964705	-3360
0.0685836	0.136904	-3360
0.228374	0.067045	-3360
0.132393	0.110456	-3360
0.273913	0.0442432	-3360
0.0655862	0.147586	-3360
0.114815	0.131385	-3360
0.153689	0.126798	-3360
0.0664069	0.189279	-3360
0.0203895	0.201594	-3360
0.18878	0.126557	-3360
0.296729	0.0742595	-3360
0.0727371	0.184934	-3360
0.201754	0.127109	-3360
0.101355	0.17464	-3360
0.158006	0.169175	-3360
0.242055	0.13245	-3360
0.147965	0.178131	-3360
0.235896	0.147345	-3360
0.223971	0.153339	-3360
0.0840131	0.216948	-3360
0.103924	0.213613	-3360
0.238522	0.160297	-3360
0.105495	0.254365	-3360
0.260111	0.209819	-3360
0.169332	0.264518	-3360
0.326946	0.201392	-3360
0.219075	0.266866	-3360
0.139793	0.308622	-3360
0.133527	0.315953	-3360
0.195146	0.305947	-3360
0.240392	0.333421	-3360
0.0524618	-0.158983	-3360
0.0262559	-0.014031	-3360
0.295423	-0.18049	-3360
0.0669636	-0.0326193	-3360
0.128275	-0.037832	-3360
0.196473	-0.0502876	-3360
0.309433	-0.12076	-3360
0.25099	-0.0768694	-3360
0.231493	-0.0352838	-3360
0.321472	-0.068971	-3360
-0.256496	0.219869	-3360
-0.00334556	0.167674	-3360
-0.21699	-0.274075	-3360
-0.187635	-0.28544	-3360
-0.1789	-0.249979	-3360
-0.243572	-0.201938	-3360
-0.176708	-0.229885	-3360
-0.134146	-0.215328	-3360
-0.164533	-0.157739	-3360
-0.122855	-0.181552	-3360
-0.191507	-0.115865	-3360
-0.0845227	-0.0770991	-3360
0.0282037	0.0117645	-3300
0.0521821	0.0504216	-3300
0.19341	0.00942213	-3300
0.175448	0.0271177	-3300
0.238029	0.00930952	-3300
0.077437	0.0906777	-3300
0.172821	0.0540628	-3300
0.0947042	0.0984256	-3300
0.208504	0.0536649	-3300
0.0675381	0.109912	-3300
0.274087	0.0310968	-3300
0.312391	0.0187467	-3300
0.325052	0.0143397	-3300
0.131329	0.0975322	-3300
0.227854	0.0612251	-3300
0.180271	0.083155	-3300
0.314041	0.0437172	-3300
0.132359	0.121564	-3300
0.0904938	0.140604	-3300
0.0683593	0.153892	-3300
0.129037	0.140116	-3300
0.182951	0.121887	-3300
0.0830434	0.169028	-3300
0.306844	0.0805649	-3300
0.12411	0.166858	-3300
0.192589	0.1489	-3300
0.146386	0.170507	-3300
0.0863356	0.205583	-3300
0.246144	0.140686	-3300
0.325485	0.112397	-3300
0.165841	0.17571	-3300
0.168715	0.205868	-3300
0.326575	0.144966	-3300
0.208318	0.196536	-3300
0.0972125	0.245328	-3300
0.112203	0.250261	-3300
0.12293	0.2515	-3300
0.1687	0.244938	-3300
0.37969	0.170109	-3300
0.0611553	0.303686	-3300
0.108776	0.297807	-3300
0.154643	0.295329	-3300
0.0338848	0.346892	-3300
0.184556	0.306298	-3300
0.144706	0.32997	-3300
0.0180286	-0.108832	-3300
0.215888	-0.21297	-3300
0.030085	-0.0676244	-3300
0.273698	-0.155258	-3300
0.228765	-0.104095	-3300
0.31154	-0.14599	-3300
0.243591	-0.10046	-3300
0.313988	-0.0838673	-3300
0.329762	-0.0930258	-3300
0.27275	-0.0560644	-3300
0.34108	-0.0834962	-3300
0.235917	-0.0114836	-3300
0.307964	-0.0271917	-3300
-0.368417	0.106781	-3300
-0.103168	0.0104323	-3300
-0.36364	0.163467	-3300
-0.0035422	0.0349427	-3300
-0.225564	0.254535	-3300
-0.0310754	0.163996	-3300
-0.215749	0.293554	-3300
-0.102561	0.265528	-3300
-0.223984	-0.235703	-3300
-0.133157	-0.234058	-3300
-0.196119	-0.164783	-3300
-0.215587	-0.146537	-3300
-0.155165	-0.171727	-3300
-0.125494	-0.129871	-3300
-0.171754	-0.0973896	-3300
-0.0662362	-0.109889	-3300
-0.0983065	-0.0385209	-3300
-0.0644934	-0.0436284	-3300
-0.0850127	-0.00860691	-3300
-0.0321267	-0.0097216	-3300
0.0515656	0.00137926	-3240
0.0864627	0.0203933	-3240
0.134669	0.0254102	-3240
0.131384	0.0475692	-3240
0.0515177	0.102543	-3240
0.08532	0.0971468	-3240
0.162511	0.0615058	-3240
0.065497	0.118207	-3240
0.189279	0.0516994	-3240
0.179405	0.0702967	-3240
0.0981498	0.112319	-3240
0.140615	0.0934713	-3240
0.273655	0.0251525	-3240
0.318966	0.0111629	-3240
0.251841	0.0366867	-3240
0.292205	0.0198401	-3240
0.0808997	0.143102	-3240
0.0465158	0.168808	-3240
0.0356156	0.171619	-3240
0.131706	0.133902	-3240
0.0933668	0.161669	-3240
0.0202745	0.213186	-3240
0.160184	0.135569	-3240
0.12372	0.168717	-3240
0.323113	0.0617559	-3240
0.172207	0.148475	-3240
0.116324	0.182486	-3240
0.313061	0.0716532	-3240
0.231067	0.116206	-3240
0.157228	0.159145	-3240
0.0547268	0.218802	-3240
0.219078	0.13425	-3240
0.0765546	0.216915	-3240
0.10983	0.204327	-3240
0.168615	0.171953	-3240
0.0961654	0.229889	-3240
0.191298	0.191747	-3240
0.143461	0.233223	-3240
0.0910061	0.265325	-3240
0.262837	0.183585	-3240
0.358167	0.148422	-3240
0.167465	0.255239	-3240
0.286977	0.194877	-3240
0.310735	0.188473	-3240
0.152671	0.29476	-3240
0.359064	0.184207	-3240
0.0349245	0.368611	-3240
0.160575	0.303528	-3240
0.0468442	0.369869	-3240
0.293881	0.239809	-3240
0.207378	0.290463	-3240
0.264123	0.296722	-3240
0.170989	0.362214	-3240
0.380542	0.269319	-3240
0.183237	-0.175948	-3240
0.216341	-0.151218	-3240
0.279033	-0.197071	-3240
0.0613231	-0.0405819	-3240
0.165905	-0.0739401	-3240
0.0852584	-0.00379614	-3240
0.219742	-0.0940467	-3240
0.211757	-0.090948	-3240
0.242131	-0.099447	-3240
0.289311	-0.124924	-3240
0.298623	-0.129398	-3240
0.220912	-0.0408708	-3240
0.183634	-0.0130822	-3240
0.224778	-0.0107707	-3240
0.282557	-0.0358093	-3240
0.306342	-0.0534848	-3240
0.340534	-0.0203557	-3240
-0.173943	0.0469167	-3240
-0.348083	0.160549	-3240
-0.281479	0.149917	-3240
-0.00821055	0.0282071	-3240
-0.0155018	0.0389745	-3240
-0.295472	0.210689	-3240
-0.0192235	0.150037	-3240
-0.104467	0.280335	-3240
-0.1753	-0.239065	-3240
-0.247787	-0.1613	-3240
-0.244186	-0.116912	-3240
-0.201028	-0.143789	-3240
-0.156508	-0.170715	-3240
-0.214565	-0.106089	-3240
-0.183815	-0.126936	-3240
-0.22185	-0.0903845	-3240
-0.199824	-0.104362	-3240
-0.149204	-0.116403	-3240
-0.157002	-0.102755	-3240
-0.17388	-0.0898953	-3240
-0.145812	-0.0805902	-3240
-0.0764437	-0.0631883	-3240
-0.0199716	-0.0992203	-3240
-0.0358284	-0.0753387	-3240
-0.0655195	-0.0320085	-3240
-0.0585009	-0.005591	-3240
0.245243	0.000506911	-3180
0.184552	0.0030793	-3180
0.304299	0.0313453	-3180
0.194474	0.00805006	-3180
0.346828	0.0402805	-3180
0.240652	0.0223949	-3180
0.106585	0.0055382	-3180
0.289084	0.0405756	-3180
0.273159	0.0374963	-3180
0.202028	0.0338269	-3180
0.224388	0.0337285	-3180
0.244279	0.0387068	-3180
0.230923	0.0554349	-3180
0.154738	0.0453497	-3180
0.183749	0.0565698	-3180
0.0510084	0.0387674	-3180
0.200778	0.0672301	-3180
0.223747	0.0767479	-3180
0.283737	0.0957003	-3180
0.312324	0.116953	-3180
0.233832	0.124897	-3180
0.0301915	0.0911154	-3180
0.319461	0.14593	-3180
0.12859	0.118905	-3180
0.14801	0.138614	-3180
0.0589865	0.125313	-3180
0.100852	0.144629	-3180
0.153373	0.166963	-3180
0.0726201	0.16551	-3180
0.332384	0.203067	-3180
0.291167	0.19821	-3180
0.109154	0.17126	-3180
0.241339	0.196409	-3180
0.0533617	0.171223	-3180
0.155124	0.190402	-3180
0.129724	0.190576	-3180
0.137054	0.205118	-3180
0.220268	0.214181	-3180
0.100096	0.200094	-3180
0.143126	0.219621	-3180
0.105651	0.215861	-3180
0.332168	0.260772	-3180
0.112387	0.227475	-3180
0.0903585	0.231424	-3180
0.21705	0.258124	-3180
0.11197	0.242485	-3180
0.118883	0.250066	-3180
0.0774193	0.246192	-3180
0.174575	0.267112	-3180
0.260289	0.283666	-3180
0.241825	0.281654	-3180
0.126429	0.275139	-3180
0.105551	0.271152	-3180
0.13646	0.289288	-3180
0.164715	0.305789	-3180
0.213061	0.327563	-3180
0.255042	0.339146	-3180
0.241949	0.339623	-3180
0.19111	0.337043	-3180
0.206896	-0.203877	-3180
0.275581	-0.156487	-3180
0.207189	-0.140065	-3180
0.181604	-0.136431	-3180
0.283775	-0.114595	-3180
0.319329	-0.0815425	-3180
0.193232	-0.0810398	-3180
0.333974	-0.0377027	-3180
0.208463	-0.0506472	-3180
0.338703	-0.00392736	-3180
0.279061	-0.00650371	-3180
0.254718	-0.00954087	-3180
-0.0807382	0.009537	-3180
-0.00185481	0.222758	-3180
-0.209066	-0.270696	-3180
-0.195909	-0.212497	-3180
-0.18359	-0.202948	-3180
-0.0912102	-0.175955	-3180
-0.111476	-0.174009	-3180
-0.131049	-0.176758	-3180
-0.182312	-0.180648	-3180
-0.0869449	-0.154395	-3180
-0.237899	-0.187939	-3180
-0.197519	-0.173893	-3180
-0.254159	-0.185387	-3180
-0.181215	-0.163997	-3180
-0.0151704	-0.122217	-3180
-0.20291	-0.157884	-3180
-0.0536234	-0.119629	-3180
-0.244668	-0.149764	-3180
-0.074618	-0.0818736	-3180
-0.0475177	-0.0619116	-3180
-0.127707	-0.0783756	-3180
-0.0403799	-0.0502574	-3180
0.118682	0.00362409	-3120
0.031219	0.0467558	-3120
0.047078	0.0518238	-3120
0.0462583	0.0741903	-3120
0.133672	0.0443755	-3120
0.100428	0.0618598	-3120
0.179738	0.0321665	-3120
0.239182	0.0113869	-3120
0.13839	0.0544543	-3120
0.0812622	0.0783505	-3120
0.104733	0.0744405	-3120
0.0808131	0.0909383	-3120
0.257571	0.0248254	-3120
0.19777	0.0521812	-3120
0.00868146	0.129946	-3120
0.0936215	0.0966068	-3120
0.279318	0.02529	-3120
0.316773	0.010329	-3120
0.0355313	0.1264	-3120
0.183722	0.0788938	-3120
0.306096	0.0218232	-3120
0.324015	0.0166408	-3120
0.0468072	0.138237	-3120
0.277386	0.0425742	-3120
0.314849	0.0326955	-3120
0.0696726	0.144113	-3120
0.196659	0.0808666	-3120
0.327615	0.0365483	-3120
0.0998724	0.1256	-3120
0.34192	0.0290928	-3120
0.17524	0.104963	-3120
0.0892451	0.151133	-3120
0.0645479	0.163413	-3120
0.122032	0.149145	-3120
0.142724	0.139996	-3120
0.272525	0.0924752	-3120
0.208662	0.118416	-3120
0.329204	0.0810954	-3120
0.162068	0.152884	-3120
0.121526	0.181905	-3120
0.0765864	0.199082	-3120
0.105881	0.201863	-3120
0.285027	0.124735	-3120
0.0769286	0.21681	-3120
0.233801	0.156251	-3120
0.0975203	0.21706	-3120
0.340573	0.115349	-3120
0.259282	0.158903	-3120
0.0816328	0.233307	-3120
0.088682	0.240598	-3120
0.118447	0.227868	-3120
0.12638	0.236781	-3120
0.174321	0.23235	-3120
0.112025	0.254959	-3120
0.0284393	0.29714	-3120
0.115411	0.271521	-3120
0.138141	0.26631	-3120
0.0272775	0.319306	-3120
0.217008	0.244737	-3120
0.0602998	0.313102	-3120
0.0861375	0.308984	-3120
0.195112	0.269327	-3120
0.152082	0.300986	-3120
0.164114	0.298048	-3120
0.110357	0.327226	-3120
0.215618	0.289041	-3120
0.0148896	-0.117241	-3120
0.183316	-0.204364	-3120
0.202304	-0.195912	-3120
0.213964	-0.109347	-3120
0.246809	-0.10892	-3120
0.147392	-0.0251144	-3120
0.315248	-0.112873	-3120
0.214193	-0.0502507	-3120
0.248042	-0.0667382	-3120
0.282825	-0.0770073	-3120
0.152973	-0.00320772	-3120
0.180942	-0.00691905	-3120
0.226623	-0.021425	-3120
0.19998	-0.00106194	-3120
0.320772	-0.0530972	-3120
0.255469	-0.0187646	-3120
0.273829	-0.0099954	-3120
-0.106522	0.0291711	-3120
-0.0874269	0.0267625	-3120
-0.0179834	0.0185391	-3120
-0.0053331	0.0458044	-3120
-0.248592	0.213638	-3120
-0.00804293	0.103814	-3120
-0.0908691	0.36684	-3120
-0.207352	-0.213822	-3120
-0.153774	-0.23752	-3120
-0.170573	-0.226119	-3120
-0.171631	-0.209626	-3120
-0.158701	-0.205731	-3120
-0.235356	-0.148671	-3120
-0.155912	-0.188698	-3120
-0.169874	-0.168657	-3120
-0.17522	-0.137343	-3120
-0.126144	-0.159633	-3120
-0.201806	-0.10762	-3120
-0.125624	-0.135011	-3120
-0.138954	-0.0876792	-3120
-0.123627	-0.0906232	-3120
-0.151671	-0.0776861	-3120
-0.0789978	-0.0955694	-3120
-0.104651	-0.0719811	-3120
0.113765	0.0162204	-3060
0.12767	0.01728	-3060
0.0943682	0.0510173	-3060
0.205759	0.0245293	-3060
0.196148	0.0385471	-3060
0.170648	0.0506967	-3060
0.161293	0.0604903	-3060
0.089036	0.097002	-3060
0.192041	0.062693	-3060
0.117493	0.100585	-3060
0.125116	0.109082	-3060
0.294879	0.0411192	-3060
0.0699468	0.142443	-3060
0.0553492	0.145113	-3060
0.0865272	0.137745	-3060
0.309092	0.0491283	-3060
0.263156	0.0718871	-3060
0.0950419	0.13893	-3060
0.0750223	0.157555	-3060
0.0908712	0.153254	-3060
0.0648072	0.168596	-3060
0.104346	0.161967	-3060
0.167145	0.139034	-3060
0.0613935	0.199741	-3060
0.07893	0.195036	-3060
0.0722054	0.216372	-3060
0.135691	0.1858	-3060
0.0858342	0.208287	-3060
0.241038	0.146395	-3060
0.064281	0.230042	-3060
0.113259	0.220004	-3060
0.270977	0.15002	-3060
0.216571	0.17526	-3060
0.111661	0.235151	-3060
0.0913075	0.245161	-3060
0.0755292	0.259597	-3060
0.12373	0.253951	-3060
0.164052	0.249218	-3060
0.0899857	0.279281	-3060
0.0984876	0.277706	-3060
0.125078	0.274548	-3060
0.11118	0.284969	-3060
0.0247871	0.330996	-3060
0.262373	0.238539	-3060
0.158303	0.281414	-3060
0.142531	0.287137	-3060
0.172361	0.280174	-3060
0.104648	0.320589	-3060
0.333532	0.229777	-3060
0.15691	0.300876	-3060
0.0633891	0.346749	-3060
0.14581	0.313075	-3060
0.166888	0.307749	-3060
0.287153	0.266121	-3060
0.0195769	-0.244333	-3060
0.0321533	-0.0586961	-3060
0.261628	-0.177523	-3060
0.25681	-0.106102	-3060
0.170655	-0.0518332	-3060
0.214043	-0.051015	-3060
0.258131	-0.0404559	-3060
0.336041	-0.100346	-3060
0.346417	-0.103406	-3060
0.204874	-0.0187023	-3060
0.304703	-0.0727397	-3060
0.340392	-0.0675227	-3060
0.3123	-0.0123014	-3060
0.349105	-0.00932708	-3060
-0.0227154	0.0840855	-3060
-0.0997174	0.152682	-3060
-0.244098	0.222188	-3060
-0.230922	-0.211024	-3060
-0.253709	-0.19615	-3060
-0.205183	-0.202263	-3060
-0.215418	-0.185192	-3060
-0.200587	-0.188049	-3060
-0.15509	-0.195629	-3060
-0.237996	-0.147256	-3060
-0.173215	-0.15639	-3060
-0.0966335	-0.174547	-3060
-0.076378	-0.185296	-3060
-0.136916	-0.126833	-3060
-0.148226	-0.119843	-3060
-0.123519	-0.121181	-3060
-0.0463188	-0.161018	-3060
-0.0660823	-0.10101	-3060
-0.108351	-0.0571778	-3060
-0.0427309	-0.0859274	-3060
-0.0747641	-0.0601388	-3060
0.178413	0.0145363	-3000
0.0777443	0.0546241	-3000
0.120748	0.0431009	-3000
0.271587	0.00169355	-3000
0.0634397	0.0940415	-3000
0.0130232	0.127447	-3000
0.191466	0.0560425	-3000
0.333693	0.00117843	-3000
0.224099	0.0428186	-3000
0.231564	0.0499809	-3000
0.0672319	0.120666	-3000
0.194357	0.0688923	-3000
0.297231	0.0376321	-3000
0.31246	0.0249164	-3000
0.207246	0.0749608	-3000
0.324939	0.0300535	-3000
0.347231	0.0197299	-3000
0.0694894	0.145709	-3000
0.358347	0.0312813	-3000
0.270962	0.0632965	-3000
0.232577	0.0979014	-3000
0.25437	0.0908379	-3000
0.311171	0.0686312	-3000
0.0353668	0.189593	-3000
0.0729761	0.18845	-3000
0.0696682	0.200206	-3000
0.13316	0.207961	-3000
0.14438	0.21065	-3000
0.0680067	0.257709	-3000
0.295652	0.17191	-3000
0.312974	0.169249	-3000
0.245064	0.205816	-3000
0.0844273	0.286104	-3000
0.234321	0.232292	-3000
0.103053	0.295327	-3000
0.261887	0.246694	-3000
0.190356	0.28204	-3000
0.0663453	0.340594	-3000
0.124175	0.320653	-3000
0.205406	0.290712	-3000
0.26939	0.268393	-3000
0.26676	0.278194	-3000
0.159922	0.384592	-3000
0.230976	0.358468	-3000
0.293491	0.389446	-3000
0.0542311	-0.143009	-3000
0.236951	-0.230853	-3000
0.183085	-0.176144	-3000
0.257186	-0.199949	-3000
0.180306	-0.0755229	-3000
0.337366	-0.179275	-3000
0.200474	-0.05694	-3000
0.182623	-0.00594499	-3000
0.222244	-0.0394093	-3000
0.361364	-0.114907	-3000
0.320916	-0.0734947	-3000
0.36503	-0.0811003	-3000
0.335698	-0.0394473	-3000
0.366505	-0.0452782	-3000
-0.114166	0.0460216	-3000
-0.0554753	0.0266173	-3000
-0.127471	0.232726	-3000
-0.227021	-0.26109	-3000
-0.21465	-0.257479	-3000
-0.189759	-0.211859	-3000
-0.21477	-0.178482	-3000
-0.292601	-0.11144	-3000
-0.242232	-0.141704	-3000
-0.145416	-0.21014	-3000
-0.169294	-0.192032	-3000
-0.217454	-0.143722	-3000
-0.105774	-0.213179	-3000
-0.188024	-0.109062	-3000
-0.0794103	-0.189553	-3000
-0.166808	-0.114977	-3000
-0.113295	-0.149451	-3000
-0.0854294	-0.080417	-3000
-0.018716	-0.0471766	-3000
-0.0322343	-0.0169502	-3000
0.122364	0.351452	-2940
0.177555	0.327771	-2940
0.237259	0.304696	-2940
0.164388	0.328625	-2940
0.146027	0.326069	-2940
0.222803	0.285787	-2940
0.065728	0.340868	-2940
0.281572	0.255346	-2940
0.119359	0.31611	-2940
0.159133	0.285972	-2940
0.210501	0.246278	-2940
0.265106	0.22027	-2940
0.0721276	0.285118	-2940
0.270579	0.208584	-2940
0.0822213	0.264346	-2940
0.298407	0.190937	-2940
0.113347	0.252679	-2940
0.179736	0.225135	-2940
0.118173	0.239513	-2940
0.0765713	0.247603	-2940
0.0522811	0.254313	-2940
0.242772	0.185199	-2940
0.227042	0.187669	-2940
0.119686	0.215832	-2940
0.180486	0.183423	-2940
0.153947	0.192745	-2940
0.0608686	0.224435	-2940
0.0865968	0.203886	-2940
0.178503	0.162675	-2940
0.0758489	0.198297	-2940
0.0990281	0.189266	-2940
0.24284	0.134779	-2940
0.136608	0.169707	-2940
0.341964	0.0931351	-2940
0.0374439	0.199206	-2940
0.132219	0.159166	-2940
0.298965	0.0986872	-2940
0.119904	0.161716	-2940
0.265161	0.10895	-2940
0.226109	0.118971	-2940
0.241893	0.101683	-2940
0.0363603	0.171985	-2940
0.05269	0.165374	-2940
0.335155	0.0565483	-2940
0.164354	0.122573	-2940
0.302503	0.0708154	-2940
0.234444	0.0867722	-2940
0.351574	0.0429683	-2940
0.00862151	0.165139	-2940
0.0942914	0.132557	-2940
0.20496	0.0870074	-2940
0.14388	0.113418	-2940
0.111112	0.124944	-2940
0.164831	0.0954067	-2940
0.195555	0.0777477	-2940
0.179341	0.0806197	-2940
0.0610867	0.119819	-2940
0.115351	0.0920086	-2940
0.21211	0.0471339	-2940
0.228603	0.0381156	-2940
0.239814	0.0336096	-2940
0.197	0.0459579	-2940
0.184405	0.0400344	-2940
0.027766	0.0890314	-2940
0.129064	0.0535525	-2940
0.10339	0.0490341	-2940
0.0866309	0.0543696	-2940
0.0729796	0.0588323	-2940
0.168845	0.00453699	-2940
0.327638	-0.00342119	-2940
0.299197	-0.00369357	-2940
0.244892	-0.0661357	-2940
0.228562	-0.10099	-2940
0.0196898	-0.0400192	-2940
0.212035	-0.164816	-2940
-0.0627599	0.289379	-2940
-0.0603602	0.140869	-2940
-0.215187	0.20703	-2940
-0.313324	0.201243	-2940
-0.180538	0.130504	-2940
-0.256462	0.162493	-2940
-0.292369	0.165321	-2940
-0.0842576	0.0551255	-2940
-0.0298316	0.0179646	-2940
-0.281198	0.126501	-2940
-0.185362	0.0659239	-2940
-0.0740423	0.00639644	-2940
-0.113435	0.00538869	-2940
-0.246493	0.0540408	-2940
-0.0535069	-0.0154986	-2940
-0.105108	-0.0315339	-2940
-0.212584	-0.00937827	-2940
-0.096891	-0.106042	-2940
-0.173228	-0.0579927	-2940
-0.161798	-0.0750638	-2940
-0.149941	-0.101212	-2940
-0.0624576	-0.152039	-2940
-0.17002	-0.102926	-2940
-0.122824	-0.137896	-2940
-0.15149	-0.133913	-2940
-0.187774	-0.111164	-2940
-0.207847	-0.12011	-2940
-0.159854	-0.154883	-2940
0.230255	0.412654	-2880
0.205558	0.349499	-2880
0.188785	0.343077	-2880
0.167929	0.341019	-2880
0.216235	0.321781	-2880
0.0952676	0.363438	-2880
0.202407	0.313745	-2880
0.0842847	0.350373	-2880
0.187861	0.310565	-2880
0.166421	0.318109	-2880
0.149876	0.310154	-2880
0.0588265	0.339257	-2880
0.130777	0.310699	-2880
0.38122	0.193352	-2880
0.0840571	0.273755	-2880
0.261653	0.207608	-2880
0.249803	0.206929	-2880
0.097181	0.25995	-2880
0.131545	0.239838	-2880
0.125463	0.22998	-2880
0.104017	0.232024	-2880
0.253793	0.178222	-2880
0.0750091	0.232481	-2880
0.0534986	0.228406	-2880
0.0959006	0.21294	-2880
0.133082	0.194099	-2880
0.319512	0.121429	-2880
0.0519693	0.1927	-2880
0.340119	0.0847539	-2880
0.158369	0.145737	-2880
0.176622	0.134057	-2880
0.292404	0.0751918	-2880
0.335204	0.0516767	-2880
0.252278	0.0755684	-2880
0.111649	0.127588	-2880
0.254085	0.0608689	-2880
0.0692118	0.128126	-2880
0.31279	0.0299436	-2880
0.0928562	0.116957	-2880
0.273625	0.0368697	-2880
0.206127	0.054037	-2880
0.127725	0.0795963	-2880
0.294452	0.0159435	-2880
0.233407	0.035202	-2880
0.00441732	0.119149	-2880
0.138815	0.0689247	-2880
0.171706	0.0499082	-2880
0.257172	0.016784	-2880
0.154457	0.0401915	-2880
0.224871	0.016784	-2880
0.00660108	0.094363	-2880
0.238962	0.00840545	-2880
0.00799528	0.0669208	-2880
0.0639338	0.0262317	-2880
0.272622	-0.00963127	-2880
0.298336	-0.0291743	-2880
0.225212	-0.000342861	-2880
0.301125	-0.0474395	-2880
0.291522	-0.0876373	-2880
0.315451	-0.125196	-2880
0.261234	-0.0923438	-2880
0.234381	-0.0779333	-2880
0.242554	-0.0970815	-2880
0.289103	-0.120718	-2880
0.220489	-0.17515	-2880
-0.0376941	0.117311	-2880
-0.109018	0.137463	-2880
-0.30276	0.161773	-2880
-0.0402292	0.0365268	-2880
-0.073589	0.0119953	-2880
-0.141158	0.0249732	-2880
-0.0788355	-0.0217742	-2880
-0.0550879	-0.0640667	-2880
-0.139113	-0.0690011	-2880
-0.230838	-0.018356	-2880
-0.104716	-0.0926773	-2880
-0.113372	-0.102026	-2880
-0.123279	-0.100833	-2880
-0.198322	-0.0667851	-2880
-0.183708	-0.089627	-2880
-0.119266	-0.136019	-2880
-0.106892	-0.148176	-2880
-0.203732	-0.104053	-2880
-0.13364	-0.137554	-2880
-0.176757	-0.114595	-2880
-0.134219	-0.153667	-2880
-0.154091	-0.13793	-2880
-0.10381	-0.174804	-2880
-0.0835095	-0.198453	-2880
-0.124475	-0.179765	-2880
-0.175971	-0.177908	-2880
-0.201649	-0.161373	-2880
-0.1882	-0.176042	-2880
-0.151217	-0.199153	-2880
-0.215659	-0.241939	-2880
0.239018	0.327651	-2820
0.108866	0.381036	-2820
0.199104	0.338881	-2820
0.0662025	0.393077	-2820
0.177951	0.33593	-2820
0.225233	0.2792	-2820
0.153663	0.308409	-2820
0.205101	0.275165	-2820
0.376573	0.198308	-2820
0.181478	0.270024	-2820
0.285277	0.226419	-2820
0.130474	0.280471	-2820
0.078483	0.300762	-2820
0.0905885	0.284556	-2820
0.210559	0.235695	-2820
0.276888	0.201819	-2820
0.128207	0.263526	-2820
0.0637044	0.281325	-2820
0.0853544	0.26517	-2820
0.341831	0.144012	-2820
0.234574	0.173063	-2820
0.138094	0.19209	-2820
0.0548387	0.21325	-2820
0.130558	0.168877	-2820
0.105227	0.1514	-2820
0.178042	0.120842	-2820
0.261738	0.0725625	-2820
0.0627948	0.154222	-2820
0.293898	0.0548706	-2820
0.251326	0.0718301	-2820
0.313939	0.034637	-2820
0.238535	0.0611389	-2820
0.268127	0.0503328	-2820
0.276839	0.0396775	-2820
0.304254	0.0202336	-2820
0.0462249	0.12138	-2820
0.125387	0.0718158	-2820
0.220348	0.0292375	-2820
0.157204	0.0478772	-2820
0.234392	0.011079	-2820
0.21678	0.00990142	-2820
0.0468057	0.0870449	-2820
0.051298	0.0749607	-2820
0.133266	0.0297042	-2820
0.176727	0.00651239	-2820
0.105661	0.0343211	-2820
0.0412078	0.0591357	-2820
0.112357	0.0189269	-2820
0.0128402	0.0446461	-2820
0.0200896	0.0161266	-2820
0.029662	0.00306592	-2820
0.309216	-0.0124674	-2820
0.252404	-0.0178647	-2820
0.306235	-0.0549528	-2820
0.34908	-0.0865603	-2820
0.213995	-0.0159701	-2820
0.253992	-0.0545646	-2820
0.219103	-0.0562559	-2820
0.317864	-0.128426	-2820
0.149521	-0.0519769	-2820
0.290225	-0.136033	-2820
0.228402	-0.205837	-2820
0.198342	-0.226438	-2820
0.0037926	-0.120783	-2820
-0.228188	0.248315	-2820
-0.0580672	0.0809794	-2820
-0.0488376	0.042532	-2820
-0.0628498	0.041874	-2820
-0.0770793	-0.0183702	-2820
-0.104979	-0.0407489	-2820
-0.0230741	-0.11632	-2820
-0.110054	-0.0878999	-2820
-0.128488	-0.101139	-2820
-0.196338	-0.0677591	-2820
-0.16045	-0.0988516	-2820
-0.0998677	-0.157684	-2820
-0.114588	-0.186489	-2820
-0.134171	-0.176423	-2820
-0.0888058	-0.204818	-2820
-0.12983	-0.190547	-2820
-0.158513	-0.179628	-2820
-0.172407	-0.212589	-2820
-0.206841	-0.201056	-2820
-0.150208	-0.239444	-2820
-0.178357	-0.250002	-2820
0.0469148	0.0507032	-2760
0.146931	0.00800612	-2760
0.136227	0.0402234	-2760
0.231167	0.00446188	-2760
0.084962	0.0709645	-2760
0.0694331	0.0906673	-2760
0.187715	0.050537	-2760
0.252135	0.0234731	-2760
0.149361	0.0889916	-2760
0.362059	0.00352429	-2760
0.325073	0.0254879	-2760
0.0782658	0.137667	-2760
0.233583	0.0734182	-2760
0.316715	0.0499252	-2760
0.343695	0.0387406	-2760
0.107257	0.177757	-2760
0.100554	0.187765	-2760
0.240418	0.151877	-2760
0.113583	0.218925	-2760
0.153145	0.292137	-2760
0.11447	0.314327	-2760
0.365501	0.227642	-2760
0.237193	0.292842	-2760
0.211609	0.310244	-2760
0.155184	0.338491	-2760
0.213487	0.327892	-2760
0.181487	0.343119	-2760
0.132638	-0.219892	-2760
0.223563	-0.264111	-2760
0.00652157	-0.10236	-2760
0.0564598	-0.133385	-2760
0.309614	-0.227499	-2760
0.0394506	-0.0543234	-2760
0.283255	-0.194085	-2760
0.0916092	-0.0707853	-2760
0.22091	-0.137982	-2760
0.271644	-0.153125	-2760
0.327084	-0.162031	-2760
0.245879	-0.107177	-2760
0.320102	-0.134954	-2760
0.252833	-0.0881768	-2760
0.220211	-0.0593809	-2760
0.276001	-0.0786814	-2760
0.250305	-0.0493358	-2760
0.254739	-0.0299853	-2760
0.333096	-0.0742936	-2760
0.323244	-0.0341133	-2760
0.296941	-0.00683665	-2760
-0.199949	0.0203613	-2760
-0.262493	0.227623	-2760
-0.0739826	0.272265	-2760
-0.15993	-0.360339	-2760
-0.217817	-0.2759	-2760
-0.17455	-0.250785	-2760
-0.142707	-0.242589	-2760
-0.193083	-0.216621	-2760
-0.119997	-0.25765	-2760
-0.293532	-0.144449	-2760
-0.214107	-0.172498	-2760
-0.141864	-0.214399	-2760
-0.216275	-0.136149	-2760
-0.135249	-0.189791	-2760
-0.344784	-0.0401846	-2760
-0.187859	-0.141495	-2760
-0.119522	-0.163702	-2760
-0.0978199	-0.113417	-2760
-0.0126895	-0.107293	-2760
-0.0812102	-0.051335	-2760
-0.0605749	-0.0492155	-2760
0.0560064	0.0151179	-2700
0.0306692	0.062378	-2700
0.180715	0.0143264	-2700
0.194824	0.023752	-2700
0.202656	0.0581038	-2700
0.089872	0.107158	-2700
0.29992	0.0415941	-2700
0.0911809	0.117164	-2700
0.0156101	0.152881	-2700
0.242109	0.0664147	-2700
0.219568	0.0862026	-2700
0.0569364	0.153692	-2700
0.368974	0.022202	-2700
0.263795	0.0706229	-2700
0.127079	0.130026	-2700
0.068427	0.154702	-2700
0.0321227	0.18536	-2700
0.171732	0.133555	-2700
0.370834	0.0478735	-2700
0.0885287	0.178276	-2700
0.167537	0.146246	-2700
0.134484	0.167095	-2700
0.129476	0.187879	-2700
0.0828798	0.213953	-2700
0.109836	0.222139	-2700
0.0906436	0.232099	-2700
0.19718	0.197654	-2700
0.124881	0.269049	-2700
0.31812	0.198479	-2700
0.306595	0.207608	-2700
0.399278	0.186098	-2700
0.129442	0.289147	-2700
0.383144	0.188664	-2700
0.32357	0.22824	-2700
0.181397	0.298045	-2700
0.270505	0.266932	-2700
0.343099	0.239011	-2700
0.197042	0.313229	-2700
0.189244	0.34049	-2700
0.345655	0.347957	-2700
0.15119	-0.189096	-2700
0.267901	-0.145545	-2700
0.213995	-0.109512	-2700
0.309571	-0.137149	-2700
0.294313	-0.0809388	-2700
0.314359	-0.0934841	-2700
0.333421	-0.0716466	-2700
0.354569	-0.0884087	-2700
0.243865	-0.0134898	-2700
0.284751	-0.0233639	-2700
-0.123662	0.0139307	-2700
-0.101254	0.0196013	-2700
-0.366185	0.186684	-2700
-0.277502	0.260425	-2700
-0.0800846	0.166147	-2700
-0.198966	-0.266655	-2700
-0.221381	-0.242887	-2700
-0.207934	-0.254002	-2700
-0.275495	-0.178905	-2700
-0.170323	-0.241643	-2700
-0.243075	-0.199058	-2700
-0.211032	-0.212956	-2700
-0.17946	-0.18944	-2700
-0.237554	-0.154464	-2700
-0.365343	-0.0786783	-2700
-0.108485	-0.210644	-2700
-0.130483	-0.200412	-2700
-0.189964	-0.150681	-2700
-0.13393	-0.171145	-2700
-0.104546	-0.172549	-2700
-0.162128	-0.129393	-2700
-0.139673	-0.145552	-2700
-0.189984	-0.117042	-2700
-0.129008	-0.149184	-2700
-0.129499	-0.126349	-2700
-0.0851547	-0.101396	-2700
-0.228067	-0.015512	-2700
-0.100951	-0.0654448	-2700
-0.0385071	-0.0990668	-2700
-0.120302	-0.0365394	-2700
-0.0402308	-0.0515638	-2700
0.0938766	0.0558114	-2640
0.0519916	0.0939985	-2640
0.184418	0.0223465	-2640
0.093566	0.0941959	-2640
0.133162	0.0757237	-2640
0.185843	0.0530921	-2640
0.298629	0.00127924	-2640
0.24073	0.0359576	-2640
0.140649	0.106126	-2640
0.0678841	0.157814	-2640
0.311254	0.0276681	-2640
0.307386	0.0380409	-2640
0.0920065	0.17636	-2640
0.116358	0.176272	-2640
0.0990413	0.194232	-2640
0.0682082	0.227895	-2640
0.114218	0.20405	-2640
0.149257	0.191776	-2640
0.195038	0.168063	-2640
0.295591	0.124284	-2640
0.0202336	0.286177	-2640
0.0870375	0.246484	-2640
0.236774	0.166513	-2640
0.0980151	0.24848	-2640
0.252971	0.161162	-2640
0.0830678	0.282449	-2640
0.0351674	0.313596	-2640
0.333777	0.155015	-2640
0.21332	0.225716	-2640
0.117148	0.300804	-2640
0.251911	0.225095	-2640
0.127444	0.314401	-2640
0.295375	0.233896	-2640
0.186146	0.331265	-2640
0.229415	0.328728	-2640
0.263489	0.353604	-2640
0.197941	0.399006	-2640
0.113638	-0.1396	-2640
0.203571	-0.186375	-2640
0.266912	-0.205922	-2640
0.20023	-0.133927	-2640
0.296037	-0.19546	-2640
0.127181	-0.0716142	-2640
0.0678571	-0.0321047	-2640
0.244032	-0.121248	-2640
0.337004	-0.183959	-2640
0.318269	-0.161805	-2640
0.185694	-0.0664178	-2640
0.199926	-0.0650148	-2640
0.210262	-0.0688601	-2640
0.165238	-0.0394662	-2640
0.185532	-0.0337156	-2640
0.295369	-0.100185	-2640
0.339434	-0.124461	-2640
0.211673	-0.0437531	-2640
0.22448	-0.0508635	-2640
0.214596	-0.0163511	-2640
0.262983	-0.0378553	-2640
0.293829	-0.0654478	-2640
0.283372	-0.0405661	-2640
0.253497	-0.00979509	-2640
0.333088	-0.0325897	-2640
0.285512	-0.006149	-2640
0.351776	-0.0486464	-2640
-0.356772	0.0835612	-2640
-0.316239	0.203025	-2640
-0.104777	0.286881	-2640
-0.176282	-0.336348	-2640
-0.136312	-0.306236	-2640
-0.183623	-0.260862	-2640
-0.154902	-0.266852	-2640
-0.167603	-0.24199	-2640
-0.20484	-0.206864	-2640
-0.160193	-0.221857	-2640
-0.292653	-0.11063	-2640
-0.188332	-0.176844	-2640
-0.19995	-0.156181	-2640
-0.11936	-0.2089	-2640
-0.155597	-0.184206	-2640
-0.148987	-0.170652	-2640
-0.175763	-0.144898	-2640
-0.189651	-0.13195	-2640
-0.119347	-0.160917	-2640
-0.10439	-0.162163	-2640
-0.163976	-0.0968399	-2640
-0.124787	-0.107836	-2640
-0.0201038	-0.162785	-2640
-0.0212544	-0.146168	-2640
-0.199844	-0.0144376	-2640
-0.0026013	-0.146488	-2640
-0.0734117	-0.0341926	-2640
0.227307	0.372504	-2580
0.235999	0.341693	-2580
0.191804	0.348807	-2580
0.145559	0.346604	-2580
0.171714	0.322425	-2580
0.123576	0.333246	-2580
0.242713	0.291706	-2580
0.342299	0.220787	-2580
0.0879799	0.284032	-2580
0.174924	0.239374	-2580
0.11928	0.248317	-2580
0.129484	0.240671	-2580
0.108192	0.244802	-2580
0.182644	0.216726	-2580
0.141565	0.227838	-2580
0.0950675	0.243087	-2580
0.264378	0.163948	-2580
0.143069	0.202185	-2580
0.147854	0.190238	-2580
0.309782	0.109575	-2580
0.0835402	0.191705	-2580
0.350833	0.085595	-2580
0.102795	0.169801	-2580
0.0935996	0.168185	-2580
0.311761	0.092575	-2580
0.344846	0.0649315	-2580
0.155395	0.127964	-2580
0.24159	0.0785442	-2580
0.320374	0.0543446	-2580
0.306372	0.0567681	-2580
0.16962	0.0907397	-2580
0.108681	0.109079	-2580
0.346444	0.0125994	-2580
0.219003	0.0531966	-2580
0.182616	0.0587239	-2580
0.329376	0.0030471	-2580
0.230941	0.0308465	-2580
0.100903	0.0592058	-2580
0.165346	0.0384855	-2580
0.191516	0.021436	-2580
0.374132	-0.00555587	-2580
0.377924	-0.0286448	-2580
0.326519	-0.0212742	-2580
0.345213	-0.029259	-2580
0.326469	-0.0398124	-2580
0.359137	-0.0655909	-2580
0.292506	-0.0318834	-2580
0.331045	-0.0556052	-2580
0.232718	-0.0117446	-2580
0.334564	-0.0657025	-2580
0.211074	-0.00565824	-2580
0.18984	-0.0156439	-2580
0.261997	-0.0682897	-2580
0.242008	-0.0552609	-2580
0.318496	-0.091025	-2580
0.136953	-0.0135128	-2580
0.209779	-0.050859	-2580
0.344163	-0.119102	-2580
0.103673	-0.00603049	-2580
0.335161	-0.136105	-2580
0.221299	-0.11953	-2580
0.124706	-0.0790106	-2580
0.0510236	-0.0620545	-2580
0.256593	-0.181538	-2580
0.224364	-0.207103	-2580
0.177197	-0.190249	-2580
0.0889944	-0.147998	-2580
0.00404389	-0.131014	-2580
-0.0843248	0.311269	-2580
-0.0981648	0.214185	-2580
-0.0751841	0.14839	-2580
-0.30685	0.186573	-2580
-0.0696843	0.0229478	-2580
-0.089547	-0.0223514	-2580
-0.0130073	-0.095106	-2580
-0.0110126	-0.115466	-2580
-0.0400096	-0.126817	-2580
-0.139504	-0.0845642	-2580
-0.0670634	-0.123719	-2580
-0.153254	-0.108549	-2580
-0.137548	-0.152912	-2580
-0.194393	-0.147679	-2580
-0.0878041	-0.208513	-2580
-0.158269	-0.180019	-2580
-0.233454	-0.148836	-2580
-0.26065	-0.139434	-2580
-0.134469	-0.203689	-2580
-0.15326	-0.20962	-2580
-0.135244	-0.224535	-2580
-0.195858	-0.210394	-2580
-0.199602	-0.264728	-2580
0.190351	0.376399	-2520
0.195158	0.359204	-2520
0.158975	0.359254	-2520
0.281635	0.309638	-2520
0.217118	0.330889	-2520
0.277701	0.299487	-2520
0.186556	0.322118	-2520
0.203596	0.31574	-2520
0.286357	0.283821	-2520
0.226825	0.296691	-2520
0.189399	0.286681	-2520
0.0147986	0.340098	-2520
0.19779	0.26788	-2520
0.010679	0.320193	-2520
0.0502278	0.302297	-2520
0.295627	0.21854	-2520
0.233094	0.236789	-2520
0.129253	0.256829	-2520
0.281252	0.203929	-2520
0.0954169	0.25038	-2520
0.124141	0.212565	-2520
0.255695	0.171784	-2520
0.260231	0.159395	-2520
0.110447	0.20264	-2520
0.221879	0.165462	-2520
0.0737547	0.201295	-2520
0.270183	0.134499	-2520
0.0553524	0.19685	-2520
0.0654562	0.192843	-2520
0.261044	0.130018	-2520
0.0890757	0.181036	-2520
0.108093	0.17688	-2520
0.255933	0.12272	-2520
0.273727	0.0976958	-2520
0.30915	0.0859802	-2520
0.205289	0.11443	-2520
0.0826219	0.148841	-2520
0.101143	0.144572	-2520
0.109521	0.134648	-2520
0.0937572	0.14019	-2520
0.348989	0.0493541	-2520
0.30794	0.0635826	-2520
0.0583148	0.140261	-2520
0.213858	0.0835026	-2520
0.403165	0.0298163	-2520
0.322745	0.0393091	-2520
0.268715	0.0644887	-2520
0.307166	0.0516193	-2520
0.280677	0.0598733	-2520
0.122594	0.0906311	-2520
0.083303	0.096457	-2520
0.236704	0.0217959	-2520
0.0897501	0.0649772	-2520
0.202994	0.010675	-2520
0.185603	0.0179308	-2520
0.145903	0.0243231	-2520
0.15602	0.0090893	-2520
0.179804	0.00121049	-2520
0.0253255	0.0229993	-2520
0.314188	-0.00358335	-2520
0.321839	-0.0281666	-2520
0.235673	-0.0117596	-2520
0.177021	-0.0103317	-2520
0.225132	-0.0349695	-2520
0.327598	-0.0815894	-2520
0.201586	-0.0409539	-2520
0.162262	-0.016789	-2520
0.288532	-0.0820351	-2520
0.132691	-0.0322865	-2520
0.315451	-0.101598	-2520
0.32902	-0.116695	-2520
0.276061	-0.124444	-2520
0.211418	-0.117032	-2520
0.288869	-0.150473	-2520
0.303225	-0.175393	-2520
0.108351	-0.11564	-2520
0.223235	-0.204915	-2520
0.254756	-0.222713	-2520
0.220557	-0.231335	-2520
0.295508	-0.33216	-2520
-0.00658587	0.0458106	-2520
-0.107454	-0.00804951	-2520
-0.0188898	-0.0489838	-2520
-0.015923	-0.101841	-2520
-0.0845146	-0.117644	-2520
-0.288646	-0.0463086	-2520
-0.0760391	-0.139645	-2520
-0.149567	-0.114035	-2520
-0.0410663	-0.160918	-2520
-0.0599868	-0.154514	-2520
-0.0915621	-0.144292	-2520
-0.145178	-0.126301	-2520
-0.123741	-0.154977	-2520
-0.0544473	-0.17308	-2520
-0.141227	-0.148125	-2520
-0.104229	-0.180874	-2520
-0.155999	-0.161613	-2520
-0.307369	-0.12543	-2520
-0.167657	-0.175388	-2520
-0.193255	-0.179333	-2520
-0.180434	-0.196854	-2520
-0.140021	-0.220827	-2520
-0.209271	-0.192989	-2520
-0.219747	-0.193787	-2520
-0.202956	-0.209782	-2520
-0.228942	-0.202332	-2520
-0.242914	-0.223142	-2520
-0.176403	-0.252857	-2520
-0.21582	-0.253328	-2520
-0.200924	-0.266153	-2520
-0.245136	-0.252561	-2520
0.35148	0.331447	-2460
0.226921	0.348738	-2460
0.314253	0.2859	-2460
0.11939	0.348759	-2460
0.168859	0.321533	-2460
0.381646	0.232295	-2460
0.270411	0.274852	-2460
0.195567	0.286966	-2460
0.0301261	0.334685	-2460
0.0852422	0.312314	-2460
0.108918	0.292899	-2460
0.306131	0.224492	-2460
0.0500265	0.307254	-2460
0.0994293	0.285075	-2460
0.189323	0.241178	-2460
0.118679	0.267928	-2460
0.336317	0.179769	-2460
0.264917	0.195286	-2460
0.130206	0.241233	-2460
0.0703251	0.26313	-2460
0.238308	0.203647	-2460
0.118719	0.240579	-2460
0.253271	0.19451	-2460
0.241188	0.181502	-2460
0.161473	0.173822	-2460
0.248162	0.136566	-2460
0.269429	0.123614	-2460
0.0978102	0.180505	-2460
0.111261	0.17407	-2460
0.341573	0.0874166	-2460
0.288427	0.0994273	-2460
0.0884738	0.166466	-2460
0.213378	0.121414	-2460
0.333981	0.0689982	-2460
0.1371	0.135549	-2460
0.313577	0.0699401	-2460
0.331208	0.0488543	-2460
0.285196	0.072422	-2460
0.125501	0.122328	-2460
0.214731	0.0860484	-2460
0.299025	0.0463792	-2460
0.277306	0.0512262	-2460
0.257359	0.0471836	-2460
0.0997678	0.0996129	-2460
0.302946	0.0251971	-2460
0.232183	0.0487511	-2460
0.186284	0.0622057	-2460
0.14795	0.0725733	-2460
0.203086	0.0436086	-2460
0.271427	0.0242621	-2460
0.238646	0.0311166	-2460
0.0970869	0.0799433	-2460
0.0888454	0.0669495	-2460
0.226078	0.0129183	-2460
0.194353	0.0194633	-2460
0.209064	0.00727383	-2460
0.165979	0.0161427	-2460
0.369303	-0.0061788	-2460
0.334167	-0.0234869	-2460
0.321367	-0.0287281	-2460
0.287923	-0.0159017	-2460
0.307027	-0.0296751	-2460
0.324459	-0.0656697	-2460
0.221128	-0.0278468	-2460
0.343743	-0.0972106	-2460
0.323597	-0.0943322	-2460
0.248281	-0.065154	-2460
0.295315	-0.091435	-2460
0.312303	-0.121054	-2460
0.172946	-0.0814589	-2460
0.263092	-0.144203	-2460
0.231818	-0.174057	-2460
0.17714	-0.164418	-2460
0.202747	-0.190015	-2460
0.00319841	-0.119985	-2460
-0.314328	0.147414	-2460
-0.0396242	-0.0231234	-2460
-0.0254268	-0.0690814	-2460
-0.0970439	-0.0545	-2460
-0.146246	-0.03894	-2460
-0.132345	-0.0588872	-2460
-0.0093263	-0.113852	-2460
-0.330712	-0.0045557	-2460
-0.139245	-0.0949157	-2460
-0.0602681	-0.125587	-2460
-0.0982286	-0.12148	-2460
-0.125017	-0.128177	-2460
-0.071907	-0.164318	-2460
-0.171591	-0.130062	-2460
-0.171547	-0.148734	-2460
-0.200931	-0.14547	-2460
-0.12029	-0.195221	-2460
-0.0989722	-0.20653	-2460
-0.302153	-0.15734	-2460
-0.192084	-0.220767	-2460
-0.174496	-0.242743	-2460
-0.152901	-0.25795	-2460
-0.16292	-0.266532	-2460
0.269826	0.381648	-2400
0.267359	0.328888	-2400
0.214923	0.339841	-2400
0.184889	0.344327	-2400
0.328971	0.268095	-2400
0.127745	0.348139	-2400
0.13936	0.326377	-2400
0.0227094	0.369576	-2400
0.178653	0.295674	-2400
0.0359416	0.349591	-2400
0.205049	0.266711	-2400
0.30095	0.219806	-2400
0.252242	0.239987	-2400
0.192687	0.25774	-2400
0.347555	0.192227	-2400
0.101294	0.287543	-2400
0.294228	0.188248	-2400
0.268195	0.200366	-2400
0.246384	0.211311	-2400
0.260651	0.197666	-2400
0.0782425	0.277399	-2400
0.0975941	0.264132	-2400
0.246596	0.189981	-2400
0.0850402	0.258065	-2400
0.235221	0.167916	-2400
0.302821	0.125928	-2400
0.090721	0.213717	-2400
0.188973	0.169406	-2400
0.0762141	0.213172	-2400
0.26135	0.131351	-2400
0.130493	0.186176	-2400
0.0983547	0.19694	-2400
0.265865	0.111329	-2400
0.103713	0.181259	-2400
0.148789	0.159611	-2400
0.0808807	0.184088	-2400
0.339332	0.0506569	-2400
0.0785782	0.166759	-2400
0.375198	0.021641	-2400
0.0720957	0.160881	-2400
0.213149	0.0837651	-2400
0.182401	0.100913	-2400
0.243135	0.0546811	-2400
0.21284	0.0617913	-2400
0.315012	0.00702707	-2400
0.181202	0.0669879	-2400
0.265269	0.0157485	-2400
0.245404	0.0168453	-2400
0.167634	0.0505435	-2400
0.208921	0.0166335	-2400
0.122524	0.0510049	-2400
0.187561	0.0136306	-2400
0.138901	0.0230403	-2400
0.0739665	0.0490912	-2400
0.341771	-0.00974454	-2400
0.345232	-0.0217393	-2400
0.295331	-0.00512505	-2400
0.247651	-0.0218087	-2400
0.294975	-0.048693	-2400
0.229012	-0.0374615	-2400
0.259266	-0.0573471	-2400
0.347294	-0.137008	-2400
0.322543	-0.108925	-2400
0.269484	-0.079701	-2400
0.169395	-0.0218583	-2400
0.198292	-0.0380364	-2400
0.228046	-0.0579022	-2400
0.336926	-0.128473	-2400
0.289349	-0.0998939	-2400
0.178098	-0.0339919	-2400
0.210504	-0.0959684	-2400
0.239415	-0.110451	-2400
0.231705	-0.131774	-2400
0.226388	-0.182341	-2400
0.158835	-0.159313	-2400
0.185081	-0.302358	-2400
-0.0154872	0.104156	-2400
-0.231475	0.198266	-2400
-0.0247744	-0.0718345	-2400
-0.0544806	-0.0654494	-2400
-0.00182541	-0.126472	-2400
-0.0207713	-0.134667	-2400
-0.0775705	-0.132128	-2400
-0.144765	-0.117593	-2400
-0.186929	-0.122994	-2400
-0.1568	-0.15607	-2400
-0.217557	-0.130161	-2400
-0.170084	-0.172643	-2400
-0.115449	-0.219789	-2400
-0.226095	-0.155499	-2400
-0.211876	-0.166539	-2400
-0.177558	-0.206765	-2400
-0.190086	-0.227896	-2400
-0.162846	-0.277273	-2400
-0.268598	-0.244733	-2400
0.286279	0.381475	-2340
0.254897	0.359271	-2340
0.337633	0.267514	-2340
0.310849	0.265603	-2340
0.24313	0.264462	-2340
0.166599	0.295689	-2340
0.0424199	0.342254	-2340
0.144022	0.268193	-2340
0.154812	0.262257	-2340
0.109885	0.280919	-2340
0.292452	0.201245	-2340
0.247916	0.218122	-2340
0.12683	0.272288	-2340
0.106961	0.265624	-2340
0.3073	0.170906	-2340
0.187809	0.221258	-2340
0.277292	0.178592	-2340
0.168279	0.228153	-2340
0.262575	0.184472	-2340
0.219973	0.201329	-2340
0.094888	0.236581	-2340
0.0845207	0.24538	-2340
0.254793	0.165208	-2340
0.103419	0.224625	-2340
0.110647	0.217674	-2340
0.21081	0.161267	-2340
0.0826387	0.216876	-2340
0.123072	0.19442	-2340
0.108453	0.194539	-2340
0.317531	0.0927017	-2340
0.31557	0.0549644	-2340
0.308446	0.0849737	-2340
0.0820005	0.174245	-2340
0.230711	0.0906787	-2340
0.12246	0.128367	-2340
0.105353	0.127478	-2340
0.309469	0.0345663	-2340
0.293963	0.0312833	-2340
0.168514	0.0835597	-2340
0.259221	0.0387663	-2340
0.298535	0.0167371	-2340
0.172297	0.0585135	-2340
0.19776	0.0435193	-2340
0.0167492	0.120758	-2340
0.24227	0.0115641	-2340
0.229988	0.0173531	-2340
0.171933	0.0392213	-2340
0.045168	0.0826637	-2340
0.0987627	0.0444644	-2340
0.189014	0.000868007	-2340
0.281154	-0.0149833	-2340
0.347597	-0.0892432	-2340
0.263272	-0.0373156	-2340
0.301302	-0.0690528	-2340
0.232502	-0.0176202	-2340
0.271132	-0.0626654	-2340
0.17485	-0.0100143	-2340
0.23652	-0.054793	-2340
0.194504	-0.0396192	-2340
0.253197	-0.0802856	-2340
0.152312	-0.0223989	-2340
0.235419	-0.0954498	-2340
0.155633	-0.0490433	-2340
0.12782	-0.0331461	-2340
0.138376	-0.0498715	-2340
0.178712	-0.0842837	-2340
0.291918	-0.160295	-2340
0.0713467	-0.0724893	-2340
0.206304	-0.185245	-2340
0.226745	-0.212089	-2340
0.0106603	-0.10158	-2340
-0.264184	0.222809	-2340
-0.279108	0.151051	-2340
-0.14513	0.0593208	-2340
-0.0487214	0.00376435	-2340
-0.0928246	0.0026358	-2340
-0.238666	0.0110583	-2340
-0.0304186	-0.00921606	-2340
-0.0817312	-0.00880393	-2340
-0.189263	-0.0616012	-2340
-0.131452	-0.1	-2340
-0.300696	-0.00576991	-2340
-0.130635	-0.124746	-2340
-0.185191	-0.0954139	-2340
-0.284308	-0.0363732	-2340
-0.20273	-0.0872852	-2340
-0.127497	-0.175614	-2340
-0.119935	-0.192266	-2340
-0.108096	-0.21866	-2340
-0.118842	-0.216854	-2340
-0.207947	-0.166836	-2340
-0.273045	-0.132138	-2340
-0.184856	-0.188495	-2340
-0.248296	-0.156059	-2340
-0.236791	-0.174562	-2340
-0.259495	-0.161549	-2340
-0.162105	-0.231173	-2340
-0.236556	-0.220063	-2340
-0.212155	-0.257304	-2340
-0.267075	-0.219905	-2340
-0.195033	-0.266933	-2340
0.0718665	0.03484	-2280
0.0183469	0.0632436	-2280
0.158392	0.015215	-2280
0.163825	0.0391743	-2280
0.221757	0.0136282	-2280
0.139393	0.0581192	-2280
0.265359	0.00247287	-2280
0.227914	0.03473	-2280
0.10937	0.0895041	-2280
0.121488	0.099368	-2280
0.332227	0.00173101	-2280
0.147217	0.087196	-2280
0.296593	0.0234167	-2280
0.190891	0.078438	-2280
0.307123	0.0256835	-2280
0.327025	0.0204012	-2280
0.0879481	0.138082	-2280
0.270054	0.0563127	-2280
0.24449	0.0700302	-2280
0.0287848	0.182134	-2280
0.215738	0.0923272	-2280
0.311582	0.0529674	-2280
0.331779	0.0447589	-2280
0.256771	0.0816733	-2280
0.213578	0.10125	-2280
0.290877	0.0684297	-2280
0.270693	0.095123	-2280
0.353946	0.0421899	-2280
0.281263	0.0783487	-2280
0.0811058	0.175814	-2280
0.371483	0.0383913	-2280
0.119097	0.162873	-2280
0.296751	0.085623	-2280
0.084708	0.18822	-2280
0.180644	0.154973	-2280
0.238089	0.128919	-2280
0.301269	0.109239	-2280
0.245392	0.159953	-2280
0.087138	0.242849	-2280
0.127599	0.219666	-2280
0.22877	0.174811	-2280
0.207506	0.188281	-2280
0.187565	0.198159	-2280
0.118649	0.235458	-2280
0.0663282	0.277401	-2280
0.300657	0.167207	-2280
0.106736	0.267654	-2280
0.0512278	0.29175	-2280
0.223555	0.222256	-2280
0.322092	0.175697	-2280
0.0835688	0.307082	-2280
0.343982	0.181598	-2280
0.149199	0.278472	-2280
0.0513398	0.338089	-2280
0.0303455	0.360159	-2280
0.168073	0.321232	-2280
0.17853	0.319646	-2280
0.228665	0.302638	-2280
0.193044	0.333782	-2280
0.208388	0.345157	-2280
0.0315046	-0.200551	-2280
0.22013	-0.292489	-2280
0.210496	-0.279613	-2280
0.220651	-0.228194	-2280
0.0386431	-0.0848742	-2280
0.0368058	-0.055774	-2280
0.248428	-0.132324	-2280
0.171938	-0.0549275	-2280
0.23527	-0.050996	-2280
0.230166	-0.0314704	-2280
0.270206	-0.0499614	-2280
0.312965	-0.0682831	-2280
0.363409	-0.0947499	-2280
0.233624	-0.00876582	-2280
0.347927	-0.0531969	-2280
0.361749	-0.0534979	-2280
0.305846	-0.00928312	-2280
0.350982	-0.0199394	-2280
-0.259789	0.229633	-2280
-0.0329176	0.210923	-2280
-0.0816772	-0.380357	-2280
-0.111334	-0.322363	-2280
-0.0423867	-0.227544	-2280
-0.0538909	-0.126584	-2280
-0.034505	-0.103966	-2280
-0.0660239	-0.00973057	-2280
0.0533391	0.0108198	-2220
0.0135266	0.0234816	-2220
0.118696	0.0201964	-2220
0.162603	0.00510065	-2220
0.114151	0.030411	-2220
0.184079	0.00459524	-2220
0.0307346	0.0952565	-2220
0.233859	0.00511395	-2220
0.169024	0.050142	-2220
0.244961	0.0175497	-2220
0.252776	0.0370745	-2220
0.170391	0.0672927	-2220
0.103197	0.102931	-2220
0.0424946	0.140451	-2220
0.300241	0.0222979	-2220
0.290319	0.0325923	-2220
0.18277	0.0901957	-2220
0.14172	0.11677	-2220
0.218946	0.0836786	-2220
0.174047	0.10718	-2220
0.239597	0.0789636	-2220
0.0241518	0.187906	-2220
0.310924	0.0479674	-2220
0.0274271	0.205955	-2220
0.254052	0.0960146	-2220
0.184678	0.128673	-2220
0.227405	0.117361	-2220
0.180301	0.145718	-2220
0.322375	0.0810052	-2220
0.0706825	0.207384	-2220
0.0808694	0.201273	-2220
0.187612	0.157495	-2220
0.104763	0.202649	-2220
0.254684	0.128181	-2220
0.0529265	0.234297	-2220
0.363948	0.0800343	-2220
0.339512	0.0954427	-2220
0.184272	0.179201	-2220
0.17141	0.186782	-2220
0.236844	0.154722	-2220
0.145072	0.209519	-2220
0.278481	0.138522	-2220
0.190384	0.195853	-2220
0.246883	0.167324	-2220
0.278378	0.152581	-2220
0.217064	0.213768	-2220
0.242569	0.199703	-2220
0.122313	0.260732	-2220
0.0953824	0.283927	-2220
0.259339	0.207923	-2220
0.305399	0.187195	-2220
0.335566	0.178496	-2220
0.168373	0.264542	-2220
0.10448	0.30445	-2220
0.298861	0.210497	-2220
0.21678	0.278734	-2220
0.380027	0.197635	-2220
0.219468	0.301031	-2220
0.250152	0.287758	-2220
0.156213	0.347569	-2220
0.19148	0.360045	-2220
0.295586	0.308413	-2220
0.211371	0.370638	-2220
0.341588	0.336703	-2220
0.116884	-0.295782	-2220
0.19787	-0.239278	-2220
0.221944	-0.246476	-2220
0.0855566	-0.131542	-2220
0.203492	-0.209169	-2220
0.266928	-0.221582	-2220
0.151797	-0.129011	-2220
0.0328751	-0.0236333	-2220
0.0347062	-0.00269435	-2220
0.234001	-0.124142	-2220
0.285999	-0.149046	-2220
0.179656	-0.0656172	-2220
0.197889	-0.0656556	-2220
0.282002	-0.103184	-2220
0.288932	-0.113808	-2220
0.180185	-0.0229597	-2220
0.334967	-0.116666	-2220
0.32006	-0.115732	-2220
0.258926	-0.0623069	-2220
0.30478	-0.0837944	-2220
0.200023	-0.00571588	-2220
0.2548	-0.0200248	-2220
0.355166	-0.0431867	-2220
0.355843	-0.0265009	-2220
0.32623	-0.00391644	-2220
0.378022	-0.00151076	-2220
-0.304938	0.00227473	-2220
-0.218868	0.0599708	-2220
-0.136667	0.0883489	-2220
-0.076191	0.0663997	-2220
-0.0569875	0.127683	-2220
-0.00320161	0.0993124	-2220
-0.313422	0.299048	-2220
-0.194115	-0.273307	-2220
-0.177073	-0.270434	-2220
-0.19125	-0.260213	-2220
-0.199752	-0.222263	-2220
-0.252896	-0.177914	-2220
-0.178456	-0.230194	-2220
-0.135888	-0.259437	-2220
-0.148626	-0.226324	-2220
-0.197821	-0.18164	-2220
-0.137763	-0.22779	-2220
-0.156561	-0.207607	-2220
-0.206392	-0.150001	-2220
-0.138049	-0.192866	-2220
-0.253139	-0.109714	-2220
-0.157651	-0.169762	-2220
-0.0772623	-0.21186	-2220
-0.191219	-0.126381	-2220
-0.101928	-0.193805	-2220
-0.236297	-0.0854989	-2220
-0.162398	-0.140576	-2220
-0.0748704	-0.16732	-2220
-0.0992563	-0.142434	-2220
-0.133048	-0.0947806	-2220
-0.0870852	-0.122425	-2220
-0.0722606	-0.123631	-2220
-0.0163444	-0.106658	-2220
-0.0379335	-0.0544162	-2220
-0.0411165	-0.0276152	-2220
0.148569	0.00299128	-2160
0.0618604	0.0423972	-2160
0.189059	0.00801828	-2160
0.0953551	0.0619651	-2160
0.0508204	0.136103	-2160
0.360258	0.0121798	-2160
0.239361	0.0678299	-2160
0.140935	0.11013	-2160
0.136332	0.124207	-2160
0.148912	0.12571	-2160
0.296044	0.0643886	-2160
0.130565	0.142646	-2160
0.215127	0.109112	-2160
0.229366	0.105318	-2160
0.20258	0.120842	-2160
0.277323	0.111557	-2160
0.311424	0.0994391	-2160
0.341951	0.0990514	-2160
0.2398	0.148511	-2160
0.257397	0.146995	-2160
0.0572817	0.237439	-2160
0.0854319	0.226714	-2160
0.224013	0.172068	-2160
0.204821	0.181748	-2160
0.157917	0.211183	-2160
0.0888619	0.235189	-2160
0.116502	0.227372	-2160
0.303798	0.174263	-2160
0.34432	0.183347	-2160
0.0899787	0.286325	-2160
0.264982	0.222338	-2160
0.277833	0.218792	-2160
0.12471	0.28055	-2160
0.146215	0.287079	-2160
0.308568	0.219007	-2160
0.131474	0.292702	-2160
0.360425	0.234268	-2160
0.212208	0.29813	-2160
0.135694	0.338478	-2160
0.203034	0.312436	-2160
0.177317	0.33719	-2160
0.314096	0.293865	-2160
0.363536	0.282579	-2160
0.286145	0.33512	-2160
0.280154	0.345589	-2160
0.247106	0.363613	-2160
0.314463	0.345458	-2160
0.230132	0.384469	-2160
0.255243	0.389717	-2160
0.234312	-0.231103	-2160
0.260316	-0.131628	-2160
0.110383	-0.0346343	-2160
0.301987	-0.151022	-2160
0.197116	-0.0413688	-2160
0.283058	-0.0904778	-2160
0.241754	-0.0626326	-2160
0.265118	-0.0505412	-2160
0.386589	-0.116749	-2160
0.254389	-0.0457855	-2160
0.405909	-0.129485	-2160
0.29196	-0.0487045	-2160
0.245176	-0.0109107	-2160
0.315133	-0.0459167	-2160
0.357434	-0.0571335	-2160
0.409842	-0.0853941	-2160
0.379139	-0.049754	-2160
0.403803	-0.0636165	-2160
-0.188467	0.0123186	-2160
-0.394395	0.150082	-2160
-0.211247	0.0809545	-2160
-0.340078	0.20314	-2160
-0.104466	0.0691693	-2160
-0.319458	0.207775	-2160
-0.0946442	0.0957485	-2160
-0.237155	0.233429	-2160
-0.0172742	0.107109	-2160
-0.257496	-0.217903	-2160
-0.248153	-0.210963	-2160
-0.207116	-0.211404	-2160
-0.321697	-0.0993181	-2160
[truncated: 9,920 more rows]
