# Supplementary material for: Spinal premotor interneurons controlling antagonistic muscles are spatially intermingled
Source: eLife. 2022 Dec 13;11:e81976. doi: 10.7554/eLife.81976 (PMC9844990; doi:10.7554/eLife.81976)
Supplement: Figure 12—figure supplement 13—source data 2. [file elife-81976-fig12-figsupp13-data2.xlsx]

## Sheet: Sheet1
0.259626	0.297707	-3420
0.352051	0.216796	-3420
0.280235	0.248511	-3420
0.158099	0.298309	-3420
0.364228	0.195839	-3420
0.283087	0.223739	-3420
0.215966	0.210605	-3420
0.170715	0.239175	-3420
0.249876	0.184893	-3420
0.122749	0.239348	-3420
0.355731	0.111761	-3420
0.0380502	0.263947	-3420
0.1132	0.210297	-3420
0.182863	0.175949	-3420
0.321281	0.0921571	-3420
0.133658	0.180342	-3420
0.27881	0.102079	-3420
0.167798	0.145739	-3420
0.101945	0.164794	-3420
0.243654	0.0904646	-3420
0.302234	0.0576744	-3420
0.155866	0.130281	-3420
0.0660263	0.171872	-3420
0.217954	0.0716661	-3420
0.253685	0.0517843	-3420
0.202651	0.0749684	-3420
0.182928	0.0859286	-3420
0.122986	0.110858	-3420
0.169167	0.0861317	-3420
0.135307	0.100469	-3420
0.258027	0.0349341	-3420
0.0622169	0.127859	-3420
0.167287	0.0683261	-3420
0.287501	0.00879371	-3420
0.0983013	0.101568	-3420
0.0290274	0.132786	-3420
0.240558	0.0199871	-3420
0.0465763	0.114905	-3420
0.106338	0.0836869	-3420
0.158034	0.0434344	-3420
0.219171	0.0102907	-3420
0.178391	0.0214314	-3420
0.0878598	0.0663853	-3420
0.0490174	0.0634065	-3420
0.0745019	0.0538906	-3420
0.113236	0.0216646	-3420
0.0926413	0.0135404	-3420
0.00902289	0.0302928	-3420
0.34166	-0.0400042	-3420
0.297928	-0.0379413	-3420
0.208715	-0.0101446	-3420
0.341905	-0.0922079	-3420
0.221799	-0.0311701	-3420
0.306764	-0.0912371	-3420
0.229022	-0.0484985	-3420
0.26008	-0.0727923	-3420
0.300312	-0.100184	-3420
0.226235	-0.0630926	-3420
0.114331	-0.0097078	-3420
0.169066	-0.0454891	-3420
0.199937	-0.079701	-3420
0.0958745	-0.063489	-3420
0.0221936	-0.0249733	-3420
0.261945	-0.159062	-3420
0.0745955	-0.0652768	-3420
0.328273	-0.216152	-3420
0.0398289	-0.066733	-3420
0.305828	-0.228368	-3420
0.245793	-0.337014	-3420
-0.0943024	0.141249	-3420
-0.211633	0.175654	-3420
-0.110842	0.100292	-3420
-0.0221378	0.00854788	-3420
-0.285241	0.139466	-3420
-0.252031	0.070655	-3420
-0.00693389	-0.0285954	-3420
-0.0211395	-0.0463976	-3420
-0.0598633	-0.0372578	-3420
-0.0584504	-0.103006	-3420
-0.105329	-0.0849828	-3420
-0.0805652	-0.109212	-3420
-0.0764033	-0.238846	-3420
-0.138002	-0.221218	-3420
-0.28885	-0.137761	-3420
-0.206396	-0.219798	-3420
-0.16411	-0.268722	-3420
-0.169462	-0.288597	-3420
-0.143961	-0.309834	-3420
-0.180243	-0.291123	-3420
-0.143669	-0.33234	-3420
-0.179444	-0.339815	-3420
-0.14327	-0.364219	-3420
-0.230922	-0.312663	-3420
-0.206481	-0.334831	-3420
-0.168417	-0.379238	-3420
-0.202357	-0.36572	-3420
-0.215749	-0.365953	-3420
0.295374	0.345866	-3360
0.225992	0.360236	-3360
0.291481	0.313356	-3360
0.192645	0.348112	-3360
0.179678	0.358207	-3360
0.330473	0.227621	-3360
0.315049	0.234039	-3360
0.227378	0.29123	-3360
0.3476	0.191516	-3360
0.252284	0.230093	-3360
0.320153	0.175488	-3360
0.0544582	0.361194	-3360
0.21011	0.236583	-3360
0.258986	0.190352	-3360
0.125706	0.27925	-3360
0.207048	0.215487	-3360
0.244632	0.183213	-3360
0.281013	0.145986	-3360
0.153667	0.23373	-3360
0.329741	0.0767115	-3360
0.201452	0.168112	-3360
0.0983218	0.242815	-3360
0.116104	0.212983	-3360
0.25208	0.103628	-3360
0.321406	0.0482705	-3360
0.306904	0.0617854	-3360
0.19368	0.142277	-3360
0.078984	0.225097	-3360
0.207935	0.118194	-3360
0.325545	0.0287192	-3360
0.121123	0.173819	-3360
0.321251	0.0110427	-3360
0.0463767	0.210903	-3360
0.160974	0.11019	-3360
0.212447	0.0661221	-3360
0.197193	0.0751458	-3360
0.123249	0.131503	-3360
0.0715573	0.167144	-3360
0.132809	0.108943	-3360
0.0772453	0.136169	-3360
0.147205	0.0744247	-3360
0.0693891	0.124189	-3360
0.081103	0.0917201	-3360
0.0532051	0.117534	-3360
0.120637	0.061703	-3360
0.0611035	0.0908548	-3360
0.158742	0.0146583	-3360
0.0411111	0.104967	-3360
0.0238571	0.116587	-3360
0.032192	0.103587	-3360
0.0835387	0.0556872	-3360
0.122404	0.0236717	-3360
0.0261872	0.0459733	-3360
0.348368	-0.00765323	-3360
0.25177	-0.00668287	-3360
0.360828	-0.0775196	-3360
0.276191	-0.0279381	-3360
0.247892	-0.0215759	-3360
0.26352	-0.0364858	-3360
0.28059	-0.0514125	-3360
0.284821	-0.0611668	-3360
0.252798	-0.0440715	-3360
0.31871	-0.097796	-3360
0.274529	-0.0861347	-3360
0.330177	-0.143859	-3360
0.294494	-0.132721	-3360
0.330177	-0.174041	-3360
0.171364	-0.0727943	-3360
0.0839047	-0.0210274	-3360
0.227294	-0.116883	-3360
0.304032	-0.170362	-3360
0.101398	-0.0460966	-3360
0.0606178	-0.0169434	-3360
0.0409563	-0.0166228	-3360
0.257522	-0.232854	-3360
-0.08452	0.265094	-3360
-0.124711	0.217522	-3360
-0.202641	0.131131	-3360
-0.191108	0.102893	-3360
-0.176489	0.0646837	-3360
-0.266245	0.115131	-3360
-0.231005	0.0659021	-3360
-0.309321	0.0745915	-3360
-0.292111	0.0358475	-3360
-0.316128	0.00271475	-3360
-0.0249453	-0.0116937	-3360
-0.0326261	-0.0372216	-3360
-0.033972	-0.066115	-3360
-0.055599	-0.0794914	-3360
-0.115166	-0.0712589	-3360
-0.17925	-0.0326848	-3360
-0.2189	-0.00769993	-3360
-0.0633881	-0.139632	-3360
-0.114694	-0.156267	-3360
-0.135393	-0.184308	-3360
-0.191673	-0.179537	-3360
-0.096602	-0.258187	-3360
-0.141148	-0.257601	-3360
-0.280091	-0.179303	-3360
-0.137868	-0.285696	-3360
-0.267847	-0.202701	-3360
-0.148171	-0.2987	-3360
-0.194032	-0.269497	-3360
-0.140119	-0.318722	-3360
-0.183141	-0.307475	-3360
-0.172443	-0.322854	-3360
-0.157817	-0.37047	-3360
-0.215342	-0.356859	-3360
-0.158954	-0.417756	-3360
0.364728	0.26513	-3300
0.413977	0.228608	-3300
0.355454	0.24428	-3300
0.239006	0.300293	-3300
0.132217	0.355759	-3300
0.25509	0.256458	-3300
0.21211	0.276414	-3300
0.164502	0.288274	-3300
0.319077	0.194172	-3300
0.163342	0.277641	-3300
0.175856	0.257859	-3300
0.195909	0.223977	-3300
0.223924	0.200604	-3300
0.0536281	0.282334	-3300
0.0924006	0.260458	-3300
0.262223	0.162266	-3300
0.135086	0.235588	-3300
0.161454	0.21758	-3300
0.250704	0.166709	-3300
0.141175	0.211591	-3300
0.241779	0.154649	-3300
0.325372	0.106606	-3300
0.305636	0.100673	-3300
0.161378	0.169503	-3300
0.0863596	0.204992	-3300
0.220533	0.123291	-3300
0.270323	0.0943654	-3300
0.27644	0.0878914	-3300
0.125221	0.169836	-3300
0.244347	0.097748	-3300
0.35623	0.026818	-3300
0.101751	0.170986	-3300
0.139885	0.148216	-3300
0.193863	0.115091	-3300
0.0612274	0.188578	-3300
0.0959635	0.161469	-3300
0.0613304	0.176795	-3300
0.193877	0.0883281	-3300
0.233651	0.0624666	-3300
0.185206	0.0864219	-3300
0.28706	0.0285508	-3300
0.169911	0.0933395	-3300
0.328111	0.00261317	-3300
0.157047	0.0995224	-3300
0.19295	0.0755949	-3300
0.201586	0.0681713	-3300
0.275465	0.0245652	-3300
0.0941237	0.117815	-3300
0.174978	0.0680604	-3300
0.140235	0.0818748	-3300
0.178273	0.0555213	-3300
0.244848	0.0181536	-3300
0.208938	0.0248563	-3300
0.126841	0.0669305	-3300
0.0373035	0.115902	-3300
0.0460493	0.0966389	-3300
0.0738656	0.0804331	-3300
0.177936	0.0191794	-3300
0.146928	0.0320304	-3300
0.0373653	0.0864288	-3300
0.10105	0.0440289	-3300
0.117636	0.0301728	-3300
0.125585	0.0184655	-3300
0.0688062	0.0487007	-3300
0.0475733	0.0595831	-3300
0.0961076	0.0237404	-3300
0.0375712	0.00346575	-3300
0.366939	-0.0278083	-3300
0.347759	-0.0240302	-3300
0.26836	-0.0133631	-3300
0.30208	-0.0408829	-3300
0.315926	-0.0545346	-3300
0.238992	-0.00710537	-3300
0.248781	-0.0256893	-3300
0.282234	-0.0512615	-3300
0.339905	-0.104101	-3300
0.295984	-0.0933347	-3300
0.203199	-0.0277813	-3300
0.320993	-0.119457	-3300
0.237345	-0.0720636	-3300
0.196526	-0.0452381	-3300
0.247958	-0.0859588	-3300
0.280456	-0.119403	-3300
0.305938	-0.146075	-3300
0.256765	-0.111603	-3300
0.366465	-0.19648	-3300
0.178019	-0.0757065	-3300
0.164461	-0.0979333	-3300
0.216386	-0.15951	-3300
0.21189	-0.17144	-3300
-0.0572811	0.0544565	-3300
-0.0790649	0.0268109	-3300
-0.304943	0.163028	-3300
-0.170076	0.0270891	-3300
-0.303949	0.109407	-3300
-0.281278	0.0352302	-3300
-0.0969805	-0.059686	-3300
-0.0519944	-0.104009	-3300
-0.0709112	-0.117086	-3300
-0.126964	-0.108252	-3300
-0.15188	-0.159243	-3300
-0.115457	-0.186125	-3300
-0.151614	-0.185726	-3300
-0.235496	-0.148054	-3300
-0.176265	-0.185934	-3300
-0.162696	-0.209386	-3300
-0.150067	-0.215292	-3300
-0.184457	-0.194534	-3300
-0.184821	-0.212209	-3300
-0.205543	-0.210953	-3300
-0.244954	-0.192152	-3300
-0.192065	-0.238891	-3300
-0.228085	-0.2367	-3300
-0.275847	-0.212071	-3300
-0.191632	-0.267132	-3300
-0.279496	-0.240389	-3300
-0.159882	-0.320851	-3300
-0.226591	-0.287024	-3300
-0.241685	-0.286375	-3300
-0.144234	-0.351162	-3300
0.346066	0.316681	-3240
0.284787	0.327068	-3240
0.312048	0.269358	-3240
0.214497	0.316884	-3240
0.184193	0.33177	-3240
0.215175	0.279786	-3240
0.177717	0.289198	-3240
0.152786	0.280295	-3240
0.300282	0.204236	-3240
0.153019	0.262623	-3240
0.295718	0.190874	-3240
0.198653	0.228263	-3240
0.129233	0.260963	-3240
0.148393	0.252771	-3240
0.278106	0.184668	-3240
0.33724	0.149278	-3240
0.261234	0.176428	-3240
0.145227	0.220295	-3240
0.166499	0.204216	-3240
0.133351	0.21108	-3240
0.144727	0.202651	-3240
0.177018	0.185881	-3240
0.300467	0.122893	-3240
0.023999	0.253794	-3240
0.0919389	0.215227	-3240
0.272424	0.123984	-3240
0.253003	0.130739	-3240
0.227565	0.139514	-3240
0.361163	0.0717083	-3240
0.219184	0.136756	-3240
0.258684	0.121761	-3240
0.216902	0.123442	-3240
0.377494	0.0411088	-3240
0.165752	0.142888	-3240
0.194541	0.126193	-3240
0.0754782	0.180792	-3240
0.205608	0.116374	-3240
0.102465	0.164564	-3240
0.129849	0.148702	-3240
0.156589	0.125027	-3240
0.185385	0.109422	-3240
0.0169404	0.191708	-3240
0.313686	0.0413256	-3240
0.0279188	0.174199	-3240
0.0719626	0.154231	-3240
0.293956	0.0311958	-3240
0.147324	0.104612	-3240
0.194616	0.0805914	-3240
0.037465	0.156589	-3240
0.237344	0.0558055	-3240
0.282231	0.030193	-3240
0.0450854	0.145002	-3240
0.14631	0.0943801	-3240
0.0721408	0.120609	-3240
0.10291	0.10407	-3240
0.160729	0.0721555	-3240
0.167314	0.0656643	-3240
0.213078	0.0429247	-3240
0.128671	0.0806049	-3240
0.200537	0.0405938	-3240
0.0262741	0.126457	-3240
0.0749848	0.0985676	-3240
0.0864566	0.0921712	-3240
0.0357997	0.109477	-3240
0.0516505	0.106773	-3240
0.101458	0.0837421	-3240
0.0638076	0.0897523	-3240
0.167952	0.0247723	-3240
0.116212	0.0474103	-3240
0.0803095	0.0619986	-3240
0.176045	0.0123116	-3240
0.0171392	0.0899827	-3240
0.165361	0.0146493	-3240
0.0302625	0.0740527	-3240
0.0844555	0.0398146	-3240
0.0906163	0.0326797	-3240
0.0638419	0.0402754	-3240
0.041049	0.0429518	-3240
0.0677686	0.0261072	-3240
0.0277544	0.0331066	-3240
0.0359847	0.00247994	-3240
0.311788	-0.0208248	-3240
0.32461	-0.0270678	-3240
0.297321	-0.0243654	-3240
0.317414	-0.06284	-3240
0.306662	-0.0823895	-3240
0.18235	-0.00313933	-3240
0.248624	-0.0510319	-3240
0.189353	-0.0129497	-3240
0.189093	-0.0364055	-3240
0.277475	-0.117136	-3240
0.116445	-0.0212261	-3240
0.310061	-0.144578	-3240
0.260219	-0.122853	-3240
0.304003	-0.199035	-3240
0.252469	-0.181715	-3240
0.258547	-0.196573	-3240
-0.116567	0.392018	-3240
-0.103097	0.217695	-3240
-0.134079	0.208405	-3240
-0.155186	0.211869	-3240
-0.0158344	0.118903	-3240
-0.163058	0.193669	-3240
-0.140848	0.158207	-3240
-0.0508121	0.0583063	-3240
-0.0667749	-0.0260201	-3240
-0.220118	-0.0115396	-3240
-0.0947042	-0.0854524	-3240
-0.111234	-0.092373	-3240
-0.220412	-0.0482762	-3240
-0.0430687	-0.159685	-3240
-0.0805621	-0.143502	-3240
-0.133731	-0.147498	-3240
-0.198111	-0.144293	-3240
-0.13951	-0.183419	-3240
-0.214414	-0.162602	-3240
-0.114429	-0.221051	-3240
-0.151333	-0.203334	-3240
-0.213349	-0.188494	-3240
-0.238581	-0.176171	-3240
-0.155375	-0.222585	-3240
-0.20173	-0.203014	-3240
-0.129251	-0.25603	-3240
-0.183448	-0.236842	-3240
-0.191562	-0.249317	-3240
-0.222739	-0.242564	-3240
-0.217126	-0.264772	-3240
-0.186024	-0.307854	-3240
-0.200144	-0.304378	-3240
-0.209443	-0.311818	-3240
-0.245033	-0.317811	-3240
0.251217	0.358858	-3180
0.299357	0.322734	-3180
0.415396	0.248683	-3180
0.287603	0.302541	-3180
0.184752	0.336284	-3180
0.300299	0.283619	-3180
0.359938	0.253811	-3180
0.203397	0.323767	-3180
0.251855	0.292175	-3180
0.332742	0.245383	-3180
0.1941	0.303491	-3180
0.226847	0.288157	-3180
0.314038	0.220717	-3180
0.144439	0.276328	-3180
0.305473	0.204818	-3180
0.124438	0.280384	-3180
0.143838	0.268131	-3180
0.340452	0.16863	-3180
0.26966	0.19933	-3180
0.178657	0.23218	-3180
0.309741	0.153398	-3180
0.239645	0.175324	-3180
0.1896	0.196371	-3180
0.257065	0.163867	-3180
0.291262	0.145901	-3180
0.229079	0.159605	-3180
0.12417	0.209285	-3180
0.240652	0.153193	-3180
0.287327	0.132737	-3180
0.133062	0.199439	-3180
0.0830024	0.211025	-3180
0.138258	0.175344	-3180
0.0851184	0.199625	-3180
0.15249	0.163745	-3180
0.222079	0.125683	-3180
0.270225	0.104508	-3180
0.0956767	0.177988	-3180
0.113605	0.170196	-3180
0.122083	0.155202	-3180
0.0899156	0.169625	-3180
0.306161	0.0716509	-3180
0.0533566	0.184907	-3180
0.330785	0.0548919	-3180
0.217014	0.106754	-3180
0.194933	0.109527	-3180
0.329821	0.0422601	-3180
0.137424	0.120066	-3180
0.115996	0.123918	-3180
0.091865	0.132416	-3180
0.126583	0.112634	-3180
0.0948796	0.118006	-3180
0.0146236	0.159387	-3180
0.297059	0.0302894	-3180
0.176324	0.0826845	-3180
0.00941332	0.152442	-3180
0.0648642	0.120131	-3180
0.241369	0.0409315	-3180
0.0925534	0.105862	-3180
0.137366	0.0850915	-3180
0.0412186	0.107197	-3180
0.140526	0.0591732	-3180
0.0789153	0.0807525	-3180
0.100039	0.0627483	-3180
0.134055	0.0481973	-3180
0.0197832	0.100182	-3180
0.0731615	0.0729218	-3180
0.146765	0.0396927	-3180
0.147649	0.031862	-3180
0.0683136	0.0589292	-3180
0.150359	0.0174458	-3180
0.0804009	0.0440188	-3180
0.0563495	0.050829	-3180
0.0284284	0.0469457	-3180
0.304306	-0.0308676	-3180
0.286552	-0.0214447	-3180
0.27616	-0.0250437	-3180
0.221014	-0.0134146	-3180
0.314263	-0.0825255	-3180
0.188585	-0.00550606	-3180
0.201687	-0.0190048	-3180
0.173157	-0.00172941	-3180
0.243116	-0.0654184	-3180
0.304581	-0.117609	-3180
0.276892	-0.124826	-3180
0.260008	-0.20006	-3180
0.203245	-0.196835	-3180
0.238224	-0.252765	-3180
0.211397	-0.232638	-3180
-0.119871	0.273085	-3180
-0.172991	0.260011	-3180
-0.0262917	0.156937	-3180
-0.0283188	0.112778	-3180
-0.0757815	0.0654488	-3180
-0.295767	0.180102	-3180
-0.0907654	0.0373038	-3180
-0.187385	0.0907612	-3180
-0.0550114	0.0122804	-3180
-0.12447	0.025395	-3180
-0.382629	0.0416973	-3180
-0.0501554	-0.0420019	-3180
-0.0625827	-0.046174	-3180
-0.0331142	-0.0758007	-3180
-0.0929967	-0.043904	-3180
-0.114848	-0.0590422	-3180
-0.129605	-0.0715896	-3180
-0.148167	-0.10279	-3180
-0.160345	-0.0978115	-3180
-0.0765833	-0.167687	-3180
-0.126141	-0.165511	-3180
-0.0989267	-0.184398	-3180
-0.161086	-0.170387	-3180
-0.140807	-0.208671	-3180
-0.191961	-0.186989	-3180
-0.165775	-0.210479	-3180
-0.104774	-0.245452	-3180
-0.139817	-0.234236	-3180
-0.184413	-0.217735	-3180
-0.216196	-0.21905	-3180
-0.240604	-0.211419	-3180
-0.196689	-0.24863	-3180
-0.222163	-0.238541	-3180
-0.233085	-0.272191	-3180
-0.200274	-0.292127	-3180
-0.293505	-0.270265	-3180
0.333119	0.329904	-3120
0.277689	0.369628	-3120
0.312169	0.329394	-3120
0.241525	0.388062	-3120
0.191523	0.41916	-3120
0.278517	0.339743	-3120
0.231034	0.356332	-3120
0.24928	0.324306	-3120
0.189887	0.376837	-3120
0.0600357	0.483345	-3120
0.243969	0.288977	-3120
0.160492	0.359452	-3120
0.206368	0.297246	-3120
0.374443	0.151371	-3120
0.28092	0.214423	-3120
0.235557	0.240668	-3120
0.336069	0.144621	-3120
0.113645	0.343638	-3120
0.204992	0.256941	-3120
0.243941	0.215219	-3120
0.169793	0.269197	-3120
0.206963	0.235856	-3120
0.28994	0.156683	-3120
0.255912	0.174975	-3120
0.239992	0.180736	-3120
0.207326	0.210039	-3120
0.245865	0.165808	-3120
0.346451	0.0441694	-3120
0.181763	0.179298	-3120
0.328547	0.0448525	-3120
0.347471	0.000295686	-3120
0.218618	0.116245	-3120
0.154114	0.162485	-3120
0.295949	0.0306188	-3120
0.133848	0.172222	-3120
0.0124493	0.279709	-3120
0.224415	0.0905411	-3120
0.253612	0.0260102	-3120
0.227687	0.0320259	-3120
0.250902	0.00425176	-3120
0.0224621	0.202892	-3120
0.205115	0.0365835	-3120
0.152546	0.0796415	-3120
0.129516	0.093345	-3120
0.074942	0.131325	-3120
0.195232	0.0226863	-3120
0.0285532	0.159619	-3120
0.0504473	0.135536	-3120
0.0408588	0.144947	-3120
0.185596	0.0117051	-3120
0.128195	0.0598	-3120
0.0748188	0.108027	-3120
0.140241	0.0485333	-3120
0.0480382	0.12478	-3120
0.169827	0.00774901	-3120
0.0604669	0.0924172	-3120
0.10986	0.0441796	-3120
0.0928117	0.0407333	-3120
0.0189442	0.0939976	-3120
0.0580441	0.0591678	-3120
0.0558061	0.0498894	-3120
0.0386413	0.0497568	-3120
0.0130721	0.0754509	-3120
0.0521788	0.0339733	-3120
0.289126	-0.0144505	-3120
0.341209	-0.0564899	-3120
0.301328	-0.0800805	-3120
0.303532	-0.0897792	-3120
0.331093	-0.112714	-3120
0.269073	-0.074912	-3120
0.187533	-0.049238	-3120
0.242963	-0.0958874	-3120
0.291685	-0.129505	-3120
0.129359	-0.0124381	-3120
0.152574	-0.0341936	-3120
0.0882947	-0.00617027	-3120
0.137873	-0.0443266	-3120
0.289057	-0.175197	-3120
0.173311	-0.0973058	-3120
0.105501	-0.0432273	-3120
0.137955	-0.096375	-3120
0.00990329	-0.00203903	-3120
0.239445	-0.183104	-3120
0.287504	-0.23135	-3120
0.170081	-0.146659	-3120
0.134369	-0.139398	-3120
0.255268	-0.235676	-3120
0.161827	-0.242777	-3120
-0.0836219	0.318018	-3120
-0.111425	0.286739	-3120
-0.0808852	0.258399	-3120
-0.113955	0.252749	-3120
-0.160532	0.257507	-3120
-0.0168253	0.0893675	-3120
-0.257547	0.238133	-3120
-0.19338	0.118796	-3120
-0.288476	0.154063	-3120
-0.316401	0.128344	-3120
-0.113068	-0.0280261	-3120
-0.0741964	-0.0519145	-3120
-0.178603	-0.000247615	-3120
-0.0989948	-0.044095	-3120
-0.0374728	-0.100623	-3120
-0.199656	-0.0470013	-3120
-0.125605	-0.0914677	-3120
-0.148607	-0.0830032	-3120
-0.120667	-0.102956	-3120
-0.0818484	-0.131705	-3120
-0.174796	-0.0882292	-3120
-0.202026	-0.0857009	-3120
-0.141796	-0.117161	-3120
-0.180109	-0.121716	-3120
-0.17034	-0.140144	-3120
-0.197837	-0.130461	-3120
-0.178435	-0.175533	-3120
-0.167618	-0.19632	-3120
-0.222054	-0.175403	-3120
-0.245094	-0.163602	-3120
-0.215212	-0.225336	-3120
-0.274387	-0.219081	-3120
-0.29265	-0.262127	-3120
0.319059	0.352469	-3060
0.278641	0.315262	-3060
0.262448	0.315063	-3060
0.326876	0.275474	-3060
0.217405	0.323766	-3060
0.264556	0.281696	-3060
0.365117	0.229226	-3060
0.189034	0.30169	-3060
0.163341	0.31093	-3060
0.262914	0.259945	-3060
0.338179	0.222844	-3060
0.314544	0.222181	-3060
0.208593	0.270539	-3060
0.240003	0.239985	-3060
0.2852	0.213703	-3060
0.18244	0.256781	-3060
0.326264	0.183196	-3060
0.218163	0.235076	-3060
0.300188	0.192576	-3060
0.265947	0.21032	-3060
0.126888	0.272589	-3060
0.26425	0.201259	-3060
0.131054	0.254287	-3060
0.235016	0.19568	-3060
0.114451	0.252211	-3060
0.302943	0.159966	-3060
0.262629	0.174122	-3060
0.122853	0.238022	-3060
0.304556	0.144178	-3060
0.273494	0.145777	-3060
0.174052	0.189352	-3060
0.264097	0.139017	-3060
0.127082	0.207388	-3060
0.304007	0.117452	-3060
0.327252	0.104663	-3060
0.180305	0.171734	-3060
0.349315	0.0835152	-3060
0.13545	0.18912	-3060
0.213489	0.149432	-3060
0.325882	0.0945201	-3060
0.111154	0.195249	-3060
0.382485	0.0537973	-3060
0.291272	0.095933	-3060
0.154097	0.160079	-3060
0.0995736	0.18583	-3060
0.219499	0.125558	-3060
0.112066	0.166301	-3060
0.200782	0.13123	-3060
0.332413	0.0621687	-3060
0.358795	0.0402518	-3060
0.250311	0.0907523	-3060
0.30471	0.0626596	-3060
0.277549	0.0743146	-3060
0.0974383	0.15787	-3060
0.121998	0.139601	-3060
0.150779	0.128802	-3060
0.183379	0.103243	-3060
0.225112	0.0817242	-3060
0.161463	0.108603	-3060
0.371391	0.00513429	-3060
0.171959	0.0959728	-3060
0.248614	0.0556282	-3060
0.150459	0.106732	-3060
0.0940719	0.130626	-3060
0.108602	0.106328	-3060
0.175965	0.0694655	-3060
0.290124	0.00666662	-3060
0.222191	0.0387062	-3060
0.121914	0.0849679	-3060
0.0438121	0.113837	-3060
0.201436	0.0395487	-3060
0.210756	0.0345736	-3060
0.0623761	0.107734	-3060
0.102676	0.0778038	-3060
0.0753062	0.0895516	-3060
0.0473802	0.100563	-3060
0.0515813	0.0910972	-3060
0.0583559	0.0887291	-3060
0.120593	0.056862	-3060
0.107983	0.053605	-3060
0.0977791	0.0594358	-3060
0.0463856	0.070308	-3060
0.0712999	0.0465204	-3060
0.12485	0.00698503	-3060
0.0830128	0.0230844	-3060
0.323093	-0.018465	-3060
0.277952	-0.00091879	-3060
0.298498	-0.0269214	-3060
0.363657	-0.0788464	-3060
0.274961	-0.0240848	-3060
0.298269	-0.0443428	-3060
0.277187	-0.0453507	-3060
0.294158	-0.066474	-3060
0.311477	-0.0803896	-3060
0.163195	-0.00137372	-3060
0.173343	-0.0156729	-3060
0.181272	-0.0212392	-3060
0.328539	-0.122583	-3060
0.1471	-0.0155481	-3060
0.189361	-0.0512025	-3060
0.187573	-0.0729055	-3060
0.281478	-0.136766	-3060
0.258456	-0.125214	-3060
0.283718	-0.151538	-3060
0.264347	-0.153482	-3060
0.229647	-0.131744	-3060
0.307241	-0.18093	-3060
0.0714599	-0.0287501	-3060
0.154633	-0.0811835	-3060
0.277173	-0.18985	-3060
0.0715433	-0.050694	-3060
0.134156	-0.10625	-3060
0.0519639	-0.0569828	-3060
0.165796	-0.268224	-3060
0.136848	-0.322094	-3060
-0.179718	0.307542	-3060
-0.121081	0.24987	-3060
-0.213524	0.281346	-3060
-0.0922631	0.190521	-3060
-0.020132	0.0957252	-3060
-0.262826	0.225261	-3060
-0.173284	0.16023	-3060
-0.163292	0.144755	-3060
-0.134247	0.121798	-3060
-0.166951	0.111315	-3060
-0.279635	0.168222	-3060
-0.000218911	0.0180399	-3060
-0.18265	0.013715	-3060
-0.00508186	-0.00900794	-3060
-0.0548919	-0.00168418	-3060
-0.056651	-0.0321952	-3060
-0.122668	-0.0251789	-3060
-0.123552	-0.0768994	-3060
-0.114889	-0.0857606	-3060
-0.109221	-0.118613	-3060
-0.0730458	-0.159977	-3060
-0.146569	-0.14275	-3060
-0.137679	-0.166168	-3060
-0.098932	-0.190739	-3060
-0.250457	-0.127914	-3060
-0.207746	-0.155099	-3060
-0.182775	-0.178922	-3060
-0.134654	-0.214786	-3060
-0.16871	-0.211809	-3060
-0.294959	-0.163617	-3060
-0.237198	-0.208531	-3060
-0.352587	-0.160892	-3060
-0.220631	-0.21886	-3060
-0.171313	-0.245926	-3060
-0.21153	-0.227057	-3060
-0.159562	-0.251104	-3060
-0.224298	-0.233745	-3060
-0.194666	-0.252642	-3060
-0.280519	-0.219	-3060
-0.189608	-0.265724	-3060
-0.252295	-0.266185	-3060
-0.215776	-0.290679	-3060
-0.232131	-0.293139	-3060
-0.197497	-0.31119	-3060
0.212909	0.38136	-3000
0.355241	0.313041	-3000
0.192025	0.373554	-3000
0.275366	0.321318	-3000
0.30663	0.302943	-3000
0.333373	0.261413	-3000
0.156393	0.328415	-3000
0.265694	0.273416	-3000
0.324096	0.24233	-3000
0.164755	0.299752	-3000
0.32698	0.225104	-3000
0.302907	0.235036	-3000
0.298164	0.227289	-3000
0.294413	0.211421	-3000
0.265895	0.214101	-3000
0.257825	0.217524	-3000
0.263448	0.19915	-3000
0.141965	0.247325	-3000
0.226402	0.20452	-3000
0.150313	0.236548	-3000
0.260452	0.187718	-3000
0.280622	0.177637	-3000
0.386068	0.123329	-3000
0.102873	0.245694	-3000
0.235235	0.185473	-3000
0.144676	0.225187	-3000
0.274527	0.161525	-3000
0.37876	0.109099	-3000
0.296299	0.14689	-3000
0.368484	0.0977678	-3000
0.306637	0.127866	-3000
0.386803	0.0913551	-3000
0.173408	0.180132	-3000
0.153863	0.187968	-3000
0.0992886	0.207188	-3000
0.121795	0.188926	-3000
0.316656	0.105842	-3000
0.349063	0.0850079	-3000
0.18799	0.152427	-3000
0.13673	0.174464	-3000
0.228821	0.137399	-3000
0.320213	0.0942191	-3000
0.204582	0.14552	-3000
0.0764911	0.201371	-3000
0.147123	0.166973	-3000
0.268287	0.10864	-3000
0.241732	0.117899	-3000
0.255536	0.111629	-3000
0.109342	0.166682	-3000
0.182256	0.136333	-3000
0.0850263	0.178745	-3000
0.0674012	0.17653	-3000
0.138283	0.142257	-3000
0.130691	0.144871	-3000
0.186319	0.118828	-3000
0.271116	0.0702177	-3000
0.0982971	0.147104	-3000
0.290135	0.060828	-3000
0.126524	0.130039	-3000
0.36119	0.0248706	-3000
0.161857	0.109128	-3000
0.037358	0.164764	-3000
0.290385	0.0455674	-3000
0.167515	0.102347	-3000
0.20929	0.0850079	-3000
0.0808037	0.140543	-3000
0.346699	0.0169039	-3000
0.0547682	0.148551	-3000
0.088292	0.132832	-3000
0.134976	0.106759	-3000
0.335321	0.0143258	-3000
0.196983	0.0759338	-3000
0.254587	0.0443289	-3000
0.268974	0.0381961	-3000
0.123771	0.100423	-3000
0.0705837	0.123371	-3000
0.0250648	0.141144	-3000
0.135281	0.0921708	-3000
0.283479	0.0235667	-3000
0.327715	0.000934808	-3000
0.211189	0.0504082	-3000
0.0198023	0.132987	-3000
0.0846657	0.10246	-3000
0.13854	0.0737783	-3000
0.0706807	0.102144	-3000
0.217471	0.0308606	-3000
0.16929	0.0467702	-3000
0.0400483	0.104442	-3000
0.228738	0.0190832	-3000
0.0210018	0.108878	-3000
0.0751598	0.0763089	-3000
0.215322	0.0044716	-3000
0.147969	0.031849	-3000
0.140023	0.0376126	-3000
0.0572712	0.0559456	-3000
0.0664929	0.0471155	-3000
0.0215148	0.0641385	-3000
0.0081816	0.0494912	-3000
0.354367	-0.00664618	-3000
0.318264	-0.0110271	-3000
0.294912	-0.0337099	-3000
0.256084	-0.00192599	-3000
0.315227	-0.0563029	-3000
0.246044	-0.0134919	-3000
0.232857	-0.0068757	-3000
0.241891	-0.0455552	-3000
0.223621	-0.0371527	-3000
0.188108	-0.0493074	-3000
0.241607	-0.108903	-3000
0.253838	-0.151275	-3000
0.111103	-0.101599	-3000
0.180467	-0.243134	-3000
-0.140586	0.400131	-3000
-0.108714	0.287944	-3000
-0.138338	0.267642	-3000
-0.195783	0.282254	-3000
-0.0771139	0.21395	-3000
-0.23184	0.275995	-3000
-0.2072	0.219994	-3000
-0.00425429	0.102494	-3000
-0.183697	0.150558	-3000
-0.198474	0.148195	-3000
-0.299092	0.161768	-3000
-0.0782106	0.0326661	-3000
-0.159104	0.0254292	-3000
-0.083227	-0.024571	-3000
-0.0968688	-0.0347566	-3000
-0.0487338	-0.0717054	-3000
-0.0612634	-0.0703251	-3000
-0.131284	-0.0393401	-3000
-0.0268713	-0.0906373	-3000
-0.0458173	-0.10289	-3000
-0.0918212	-0.093014	-3000
-0.106054	-0.0976492	-3000
-0.117526	-0.0946599	-3000
-0.12304	-0.114655	-3000
-0.303431	-0.0357826	-3000
-0.233566	-0.0803705	-3000
-0.0963788	-0.150017	-3000
-0.127963	-0.164439	-3000
-0.0872791	-0.190995	-3000
-0.190105	-0.153301	-3000
-0.0858403	-0.225973	-3000
-0.179124	-0.192722	-3000
-0.194679	-0.184375	-3000
-0.172637	-0.203794	-3000
-0.187679	-0.203417	-3000
-0.212411	-0.198295	-3000
-0.132186	-0.261911	-3000
-0.296525	-0.178514	-3000
-0.187134	-0.244551	-3000
-0.145696	-0.265911	-3000
-0.267282	-0.212577	-3000
-0.376307	-0.178086	-3000
-0.293842	-0.226365	-3000
-0.210444	-0.276916	-3000
-0.297147	-0.242566	-3000
-0.230113	-0.27764	-3000
-0.233838	-0.289456	-3000
0.0797701	0.00409356	-2940
0.0459981	0.0268723	-2940
0.0956613	0.0268843	-2940
0.0868322	0.0479703	-2940
0.192187	0.0108822	-2940
0.127732	0.0346632	-2940
0.0603119	0.0712712	-2940
0.157295	0.0361278	-2940
0.201422	0.0251796	-2940
0.158977	0.0457855	-2940
0.198758	0.0346452	-2940
0.143269	0.0556473	-2940
0.187972	0.0454914	-2940
0.0279209	0.110904	-2940
0.214426	0.047034	-2940
0.0690822	0.11031	-2940
0.0950919	0.101001	-2940
0.0490546	0.123497	-2940
0.259233	0.0429764	-2940
0.279274	0.0379105	-2940
0.0545982	0.139847	-2940
0.178423	0.0901905	-2940
0.0695665	0.138425	-2940
0.130166	0.115502	-2940
0.118464	0.121372	-2940
0.168808	0.104074	-2940
0.226999	0.0822074	-2940
0.16136	0.111162	-2940
0.0350156	0.159439	-2940
0.0657312	0.158178	-2940
0.205447	0.0981135	-2940
0.295506	0.0617756	-2940
0.127889	0.134277	-2940
0.154056	0.126516	-2940
0.31175	0.0651729	-2940
0.324343	0.062862	-2940
0.237661	0.099596	-2940
0.230691	0.106511	-2940
0.221083	0.114206	-2940
0.251962	0.101649	-2940
0.320625	0.0767093	-2940
0.347368	0.0687683	-2940
0.244867	0.11447	-2940
0.178868	0.143557	-2940
0.396468	0.0515957	-2940
0.0855494	0.181161	-2940
0.223367	0.127237	-2940
0.10987	0.177998	-2940
0.0544804	0.202793	-2940
0.149291	0.164979	-2940
0.204033	0.154505	-2940
0.0610581	0.215374	-2940
0.30569	0.117969	-2940
0.19235	0.175861	-2940
0.273816	0.144841	-2940
0.26015	0.161324	-2940
0.144644	0.20999	-2940
0.105178	0.22912	-2940
0.114426	0.226713	-2940
0.245299	0.175399	-2940
0.363024	0.125034	-2940
0.301573	0.154655	-2940
0.375164	0.126576	-2940
0.102246	0.241388	-2940
0.234742	0.186977	-2940
0.268344	0.173502	-2940
0.172015	0.220854	-2940
0.334298	0.157356	-2940
0.361656	0.152692	-2940
0.0973369	0.278026	-2940
0.1298	0.280511	-2940
0.268252	0.242613	-2940
0.288332	0.253729	-2940
0.304721	0.25526	-2940
0.328806	0.258237	-2940
0.35373	0.260379	-2940
0.208222	0.318524	-2940
0.139945	0.351476	-2940
0.429691	0.260872	-2940
0.396704	0.305253	-2940
0.305415	0.367058	-2940
0.25778	0.390887	-2940
0.000962111	-0.151796	-2940
0.134035	-0.225952	-2940
0.172493	-0.225382	-2940
0.190616	-0.204329	-2940
0.228151	-0.208645	-2940
0.122548	-0.123292	-2940
0.0122326	-0.0227419	-2940
0.238597	-0.183592	-2940
0.111644	-0.0875273	-2940
0.285361	-0.160449	-2940
0.0932266	-0.00894902	-2940
0.322163	-0.125413	-2940
0.196192	-0.0257706	-2940
0.190655	-0.0141411	-2940
0.319022	-0.0701253	-2940
0.323754	-0.0536308	-2940
0.265242	-0.000907566	-2940
0.29095	-0.000232168	-2940
-0.0192831	0.295953	-2940
-0.182507	0.817692	-2940
-0.200774	0.968708	-2940
-0.181384	1.0841	-2940
-0.170294	1.18679	-2940
-0.370059	-0.288803	-2940
-0.200918	-0.329316	-2940
-0.306952	-0.287687	-2940
-0.256029	-0.304032	-2940
-0.179753	-0.296492	-2940
-0.203224	-0.275772	-2940
-0.247555	-0.258696	-2940
-0.18124	-0.28438	-2940
-0.182757	-0.267548	-2940
-0.164483	-0.25894	-2940
-0.219625	-0.234866	-2940
-0.216006	-0.230024	-2940
-0.199939	-0.238984	-2940
-0.166402	-0.244225	-2940
-0.248397	-0.199262	-2940
-0.213268	-0.20998	-2940
-0.150085	-0.229219	-2940
-0.224616	-0.194048	-2940
-0.304138	-0.160418	-2940
-0.213032	-0.193642	-2940
-0.18737	-0.203745	-2940
-0.234576	-0.183992	-2940
-0.171637	-0.19918	-2940
-0.206046	-0.166579	-2940
-0.166987	-0.181618	-2940
-0.177303	-0.171536	-2940
-0.137129	-0.181071	-2940
-0.145352	-0.17349	-2940
-0.215824	-0.142931	-2940
-0.157095	-0.159897	-2940
-0.127472	-0.148401	-2940
-0.173571	-0.124943	-2940
-0.112687	-0.128101	-2940
-0.159924	-0.0973383	-2940
-0.130787	-0.105413	-2940
-0.204779	-0.0719995	-2940
-0.0239788	-0.129656	-2940
-0.24019	-0.0366726	-2940
-0.178388	-0.0565271	-2940
-0.155297	-0.0666842	-2940
-0.12528	-0.0720063	-2940
-0.0201934	-0.110403	-2940
-0.189759	-0.0412102	-2940
-0.0191921	-0.099367	-2940
-0.104563	-0.0582921	-2940
-0.0869183	-0.0656023	-2940
-0.0949365	-0.0583327	-2940
0.129557	0.0150252	-2880
0.145737	0.0284533	-2880
0.108425	0.047386	-2880
0.228623	0.00455777	-2880
0.203902	0.0308377	-2880
0.00850213	0.117749	-2880
0.26267	0.020336	-2880
0.133977	0.0751148	-2880
0.304552	0.00662845	-2880
0.127545	0.0806195	-2880
0.0718268	0.105051	-2880
0.292129	0.0160178	-2880
0.31615	0.00928667	-2880
0.268499	0.0298565	-2880
0.150436	0.0812356	-2880
0.0360205	0.127441	-2880
0.203954	0.0622287	-2880
0.161242	0.0808705	-2880
0.307102	0.0213514	-2880
0.0289072	0.138359	-2880
0.0556273	0.134902	-2880
0.225696	0.0690853	-2880
0.0324639	0.148011	-2880
0.101669	0.12104	-2880
0.11328	0.121634	-2880
0.148015	0.110693	-2880
0.129661	0.119928	-2880
0.108399	0.129243	-2880
0.11511	0.130955	-2880
0.326449	0.0441231	-2880
0.128012	0.12727	-2880
0.162177	0.116158	-2880
0.279285	0.0697698	-2880
0.185664	0.110573	-2880
0.171146	0.119569	-2880
0.110904	0.146122	-2880
0.15507	0.125992	-2880
0.206135	0.109061	-2880
0.224417	0.0995351	-2880
0.320576	0.0645161	-2880
0.289592	0.0815892	-2880
0.243369	0.102998	-2880
0.267311	0.0948689	-2880
0.223204	0.116192	-2880
0.12186	0.158147	-2880
0.34063	0.0757879	-2880
0.264267	0.109866	-2880
0.183776	0.151234	-2880
0.177889	0.163886	-2880
0.166408	0.168974	-2880
0.260081	0.136476	-2880
0.36417	0.0946978	-2880
0.071379	0.217712	-2880
0.0792386	0.218374	-2880
0.122846	0.204404	-2880
0.208938	0.17113	-2880
0.19111	0.18275	-2880
0.235853	0.168563	-2880
0.26846	0.162711	-2880
0.208873	0.196344	-2880
0.265877	0.179065	-2880
0.0125974	0.285052	-2880
0.335847	0.153589	-2880
0.157458	0.236205	-2880
0.025792	0.299244	-2880
0.246562	0.207946	-2880
0.164052	0.245133	-2880
0.0993387	0.273147	-2880
0.283102	0.204586	-2880
0.260237	0.224112	-2880
0.284646	0.215037	-2880
0.213339	0.259639	-2880
0.316442	0.221471	-2880
0.150987	0.294749	-2880
0.236418	0.260808	-2880
0.262197	0.266701	-2880
0.317344	0.242617	-2880
0.24958	0.278629	-2880
0.303104	0.258726	-2880
0.165863	0.332301	-2880
0.218803	0.316175	-2880
0.215831	0.321485	-2880
0.33159	0.274858	-2880
0.367636	0.265395	-2880
0.30202	0.293426	-2880
0.295803	0.315228	-2880
0.330428	0.315952	-2880
0.297575	0.337703	-2880
0.241856	0.372448	-2880
0.247555	0.388118	-2880
0.0699446	-0.204651	-2880
0.244128	-0.310108	-2880
0.125092	-0.185953	-2880
0.129486	-0.160263	-2880
0.232219	-0.18682	-2880
0.0725926	-0.0615541	-2880
0.215539	-0.16444	-2880
0.0564386	-0.023765	-2880
0.249599	-0.166534	-2880
0.196269	-0.114986	-2880
0.203461	-0.112267	-2880
0.113721	-0.0273926	-2880
0.252734	-0.130755	-2880
0.193018	-0.0279532	-2880
0.223366	-0.0565515	-2880
0.347873	-0.135768	-2880
0.229155	-0.0439974	-2880
0.188293	-0.00832355	-2880
0.200618	-0.00965616	-2880
0.305616	-0.0537276	-2880
0.272938	-0.019471	-2880
0.293823	-0.0131252	-2880
0.340267	-0.0496452	-2880
-0.423356	0.0441552	-2880
-0.324006	0.0232993	-2880
-0.327973	0.13224	-2880
-0.285159	0.152856	-2880
-0.0793159	0.067549	-2880
-0.12265	0.0963531	-2880
-0.258368	0.202865	-2880
-0.232686	0.211584	-2880
-0.19794	0.269112	-2880
-0.0484469	0.236527	-2880
-0.136708	0.332924	-2880
-0.03107	0.388474	-2880
-0.240128	-0.268217	-2880
-0.315619	-0.228594	-2880
-0.226018	-0.236261	-2880
-0.266473	-0.201473	-2880
-0.230558	-0.202255	-2880
-0.120433	-0.231941	-2880
-0.177237	-0.210662	-2880
-0.226353	-0.185941	-2880
-0.157218	-0.210895	-2880
-0.273736	-0.161967	-2880
-0.194547	-0.196021	-2880
-0.198312	-0.187353	-2880
-0.271838	-0.150282	-2880
-0.217118	-0.160465	-2880
-0.171454	-0.175079	-2880
-0.196571	-0.163551	-2880
-0.126684	-0.189884	-2880
-0.242837	-0.136951	-2880
-0.229129	-0.134352	-2880
-0.106888	-0.184748	-2880
-0.208984	-0.118607	-2880
-0.187402	-0.116207	-2880
-0.241252	-0.0889828	-2880
-0.113668	-0.137884	-2880
-0.124727	-0.120678	-2880
-0.248374	-0.0584669	-2880
-0.0964472	-0.120376	-2880
-0.123819	-0.091184	-2880
-0.186814	-0.053509	-2880
-0.0985161	-0.0568006	-2880
-0.0573846	-0.0611071	-2880
-0.0993942	-0.0239943	-2880
0.0593242	0.0401185	-2820
0.119937	0.0418688	-2820
0.201759	0.00798626	-2820
0.106253	0.065559	-2820
0.0677831	0.0899085	-2820
0.116565	0.0751001	-2820
0.0245946	0.13527	-2820
0.204697	0.0420398	-2820
0.232821	0.0394266	-2820
0.130952	0.111107	-2820
0.03051	0.172075	-2820
0.264336	0.0469325	-2820
0.174818	0.0979517	-2820
0.0791603	0.154352	-2820
0.107659	0.142735	-2820
0.209337	0.0863998	-2820
0.0972086	0.151218	-2820
0.252447	0.0885815	-2820
0.0592782	0.195309	-2820
0.136736	0.157503	-2820
0.079857	0.188967	-2820
0.321702	0.0648751	-2820
0.104024	0.180314	-2820
0.209219	0.124662	-2820
0.229627	0.114738	-2820
0.298928	0.0872953	-2820
0.135461	0.179939	-2820
0.307946	0.0923671	-2820
0.356425	0.0732928	-2820
0.137577	0.194308	-2820
0.223021	0.158846	-2820
0.202271	0.17779	-2820
0.313138	0.132591	-2820
0.187713	0.217241	-2820
0.293742	0.160694	-2820
0.0913853	0.281107	-2820
0.305948	0.169266	-2820
0.27181	0.189619	-2820
0.223199	0.222581	-2820
0.203639	0.236209	-2820
0.235549	0.220668	-2820
0.193918	0.255577	-2820
0.154988	0.284729	-2820
0.110268	0.323399	-2820
0.236068	0.255707	-2820
0.283634	0.25394	-2820
0.317476	0.237357	-2820
0.182034	0.314126	-2820
0.204749	0.309323	-2820
0.189567	0.324408	-2820
0.287571	0.271427	-2820
0.184131	0.337181	-2820
0.154186	0.354033	-2820
0.224612	0.317399	-2820
0.129782	0.37432	-2820
0.114449	0.384521	-2820
0.118655	0.394567	-2820
0.289891	0.299236	-2820
0.275122	0.308859	-2820
0.186109	0.360643	-2820
0.271211	0.317521	-2820
0.206386	0.365479	-2820
0.160299	0.387329	-2820
0.257402	0.337881	-2820
0.192432	0.392124	-2820
0.133042	0.426821	-2820
0.28222	0.346861	-2820
0.308695	0.331792	-2820
0.323417	0.335113	-2820
0.152721	0.434685	-2820
0.185216	0.425714	-2820
0.212952	-0.333927	-2820
0.0225308	-0.156896	-2820
0.166964	-0.20123	-2820
0.204394	-0.199002	-2820
0.224316	-0.160449	-2820
0.0752299	-0.0372926	-2820
0.152234	-0.0621326	-2820
0.20659	-0.0972411	-2820
0.23681	-0.111487	-2820
0.157295	-0.0418672	-2820
0.185939	-0.0505167	-2820
0.177526	-0.022808	-2820
0.299467	-0.116126	-2820
0.284948	-0.0852775	-2820
0.266012	-0.0273066	-2820
0.29043	-0.0305339	-2820
0.326526	-0.0421715	-2820
0.318245	-0.0356192	-2820
0.315333	-0.0147671	-2820
-0.397522	0.06833	-2820
-0.107448	0.0110967	-2820
-0.211379	0.106437	-2820
-0.252847	0.123945	-2820
-0.323457	0.162594	-2820
-0.0943572	0.0675479	-2820
-0.281927	0.219749	-2820
-0.0819074	0.126338	-2820
-0.17554	0.192492	-2820
-0.191812	0.242322	-2820
-0.0862786	0.198996	-2820
-0.129387	0.293182	-2820
-0.198601	-0.318841	-2820
-0.333527	-0.258497	-2820
-0.245921	-0.282234	-2820
-0.296887	-0.217829	-2820
-0.133034	-0.278991	-2820
-0.224408	-0.235638	-2820
-0.258874	-0.218051	-2820
-0.141936	-0.258038	-2820
-0.165135	-0.247297	-2820
-0.233669	-0.212916	-2820
-0.1472	-0.245482	-2820
-0.151693	-0.23216	-2820
-0.188013	-0.214521	-2820
-0.190728	-0.200321	-2820
-0.176104	-0.197662	-2820
-0.263268	-0.151492	-2820
-0.166042	-0.189487	-2820
-0.192574	-0.175772	-2820
-0.211203	-0.159659	-2820
-0.147558	-0.185951	-2820
-0.116144	-0.198487	-2820
-0.264153	-0.139892	-2820
-0.165745	-0.173434	-2820
-0.174029	-0.154079	-2820
-0.0685423	-0.192985	-2820
-0.0852106	-0.180855	-2820
-0.10326	-0.165253	-2820
-0.130776	-0.142846	-2820
-0.151052	-0.133873	-2820
-0.202011	-0.0798101	-2820
-0.0925492	-0.110136	-2820
-0.0479758	-0.0800589	-2820
-0.0199486	-0.0877026	-2820
-0.10908	-0.0365548	-2820
-0.0321008	-0.0583331	-2820
-0.0943343	-0.0304045	-2820
-0.0208259	-0.0447093	-2820
-0.0726235	-0.0243131	-2820
0.232328	0.404742	-2760
0.223329	0.404236	-2760
0.262335	0.367668	-2760
0.20563	0.402904	-2760
0.241755	0.345268	-2760
0.316378	0.276427	-2760
0.192435	0.363093	-2760
0.358005	0.216106	-2760
0.191968	0.341282	-2760
0.256611	0.289863	-2760
0.30457	0.248874	-2760
0.339426	0.222127	-2760
0.148886	0.362184	-2760
0.15477	0.337419	-2760
0.326838	0.200585	-2760
0.213676	0.283698	-2760
0.136778	0.340001	-2760
0.307738	0.196609	-2760
0.226898	0.258293	-2760
0.378406	0.141358	-2760
0.255237	0.228313	-2760
0.302615	0.183359	-2760
0.117792	0.323488	-2760
0.378426	0.118907	-2760
0.234723	0.22601	-2760
0.137118	0.293787	-2760
0.260934	0.198044	-2760
0.372462	0.0922009	-2760
0.194023	0.241718	-2760
0.165043	0.248854	-2760
0.0973783	0.300159	-2760
0.248085	0.185631	-2760
0.232001	0.19256	-2760
0.121241	0.271191	-2760
0.269193	0.147028	-2760
0.0894396	0.278214	-2760
0.224963	0.157624	-2760
0.0941628	0.248699	-2760
0.228579	0.14393	-2760
0.169093	0.180984	-2760
0.306638	0.0727652	-2760
0.108739	0.226217	-2760
0.194703	0.153472	-2760
0.308652	0.0613847	-2760
0.272168	0.0907758	-2760
0.11044	0.210395	-2760
0.315063	0.0463483	-2760
0.161401	0.167217	-2760
0.205377	0.131537	-2760
0.116458	0.190846	-2760
0.258579	0.0821629	-2760
0.182855	0.121881	-2760
0.216564	0.09154	-2760
0.0868579	0.186509	-2760
0.206704	0.0764417	-2760
0.0271381	0.210426	-2760
0.134163	0.125289	-2760
0.0323015	0.202516	-2760
0.223943	0.045171	-2760
0.0851301	0.141658	-2760
0.17988	0.063574	-2760
0.138666	0.0860356	-2760
0.023062	0.17139	-2760
0.147845	0.0437665	-2760
0.169833	0.0276355	-2760
0.106811	0.0692643	-2760
0.0913276	0.0578321	-2760
0.018559	0.102187	-2760
0.358492	-0.0253563	-2760
0.343242	-0.031896	-2760
0.278506	-0.00165498	-2760
0.320827	-0.0361087	-2760
0.277992	-0.0639926	-2760
0.232168	-0.0394387	-2760
0.20523	-0.036199	-2760
0.180754	-0.0173322	-2760
0.177105	-0.0458079	-2760
0.128212	-0.0484659	-2760
0.10962	-0.175137	-2760
-0.21625	0.360202	-2760
-0.135606	0.315676	-2760
-0.122337	0.295312	-2760
-0.141653	0.287317	-2760
-0.118341	0.262482	-2760
-0.114923	0.244194	-2760
-0.214716	0.249496	-2760
-0.195332	0.22985	-2760
-0.184075	0.202116	-2760
-0.228662	0.170423	-2760
-0.332184	0.215903	-2760
-0.260032	0.138882	-2760
-0.0872825	0.0170751	-2760
-0.156343	0.0443434	-2760
-0.1863	0.0497909	-2760
-0.199441	0.0319758	-2760
-0.343896	0.0959044	-2760
-0.320745	0.0232246	-2760
-0.0684907	-0.031669	-2760
-0.112789	-0.0155488	-2760
-0.0362696	-0.0563012	-2760
-0.105854	-0.0410515	-2760
-0.0382673	-0.0754914	-2760
-0.0442527	-0.0901564	-2760
-0.0810768	-0.0770662	-2760
-0.0905259	-0.106463	-2760
-0.105877	-0.101333	-2760
-0.0847835	-0.128311	-2760
-0.174633	-0.0965686	-2760
-0.137764	-0.120596	-2760
-0.105034	-0.147062	-2760
-0.0797171	-0.163216	-2760
-0.183376	-0.131826	-2760
-0.17136	-0.143634	-2760
-0.145777	-0.153734	-2760
-0.213197	-0.128085	-2760
-0.154019	-0.189562	-2760
-0.167645	-0.18638	-2760
-0.25931	-0.145893	-2760
-0.205085	-0.173063	-2760
-0.18368	-0.182997	-2760
-0.104578	-0.218593	-2760
-0.318937	-0.132078	-2760
-0.206908	-0.19535	-2760
-0.23511	-0.183024	-2760
-0.196182	-0.200234	-2760
-0.116078	-0.242309	-2760
-0.131041	-0.240129	-2760
-0.154398	-0.251166	-2760
-0.123666	-0.290809	-2760
-0.226041	-0.251312	-2760
-0.251016	-0.252442	-2760
-0.2051	-0.278157	-2760
-0.181014	-0.308185	-2760
-0.293917	-0.259818	-2760
0.344594	0.238289	-2700
0.297135	0.26722	-2700
0.25596	0.294956	-2700
0.359059	0.184997	-2700
0.191284	0.356915	-2700
0.0765274	0.471207	-2700
0.27458	0.258303	-2700
0.352878	0.174216	-2700
0.163129	0.356967	-2700
0.117412	0.400016	-2700
0.291022	0.210133	-2700
0.0915452	0.415499	-2700
0.156194	0.326237	-2700
0.170624	0.312934	-2700
0.180504	0.294614	-2700
0.343585	0.115382	-2700
0.254031	0.198629	-2700
0.121871	0.33828	-2700
0.206156	0.232905	-2700
0.170997	0.269531	-2700
0.180276	0.258067	-2700
0.265861	0.16023	-2700
0.0897959	0.333539	-2700
0.363816	0.0293905	-2700
0.099386	0.302783	-2700
0.179004	0.218354	-2700
0.286922	0.0907324	-2700
0.0463327	0.34637	-2700
0.0691706	0.32126	-2700
0.116368	0.268415	-2700
0.315292	0.0508096	-2700
0.13823	0.230699	-2700
0.046305	0.326185	-2700
0.184093	0.164379	-2700
0.16651	0.17285	-2700
0.147281	0.189712	-2700
0.286528	0.0257528	-2700
0.110663	0.21117	-2700
0.0640471	0.260483	-2700
0.193725	0.110996	-2700
0.0901347	0.218288	-2700
0.226256	0.0735814	-2700
0.118781	0.175056	-2700
0.25354	0.0252144	-2700
0.1666	0.106754	-2700
0.0431313	0.230226	-2700
0.142939	0.127136	-2700
0.129913	0.136801	-2700
0.23687	0.0153388	-2700
0.156602	0.088907	-2700
0.20496	0.0381762	-2700
0.0386163	0.211761	-2700
0.00294549	0.247127	-2700
0.167111	0.0561808	-2700
0.0845134	0.100713	-2700
0.0977128	0.039253	-2700
0.313722	-0.00696611	-2700
0.26667	-0.0456818	-2700
0.314358	-0.0854632	-2700
0.233641	-0.0403434	-2700
0.273993	-0.0764334	-2700
0.196525	-0.0357897	-2700
0.314711	-0.120449	-2700
0.268468	-0.108386	-2700
0.257523	-0.103465	-2700
0.123558	-0.0466603	-2700
0.0853362	-0.0137094	-2700
0.251784	-0.157701	-2700
0.0312941	-0.124324	-2700
-0.161897	0.348631	-2700
-0.127843	0.266289	-2700
-0.135488	0.250923	-2700
-0.170938	0.26689	-2700
-0.0848167	0.188701	-2700
-0.0657874	0.166169	-2700
-0.199273	0.199551	-2700
-0.085651	0.113348	-2700
-0.159652	0.144918	-2700
-0.314428	0.212664	-2700
-0.129997	0.029839	-2700
-0.364174	0.139458	-2700
-0.332744	0.0356796	-2700
-0.0302771	-0.00116864	-2700
-0.0544031	-0.0388379	-2700
-0.0861212	-0.0270086	-2700
-0.169065	-0.0204123	-2700
-0.139053	-0.0422789	-2700
-0.0794166	-0.0926343	-2700
-0.0401368	-0.115332	-2700
-0.190324	-0.0514332	-2700
-0.124688	-0.0831164	-2700
-0.155352	-0.082188	-2700
-0.115723	-0.101503	-2700
-0.150725	-0.100756	-2700
-0.162095	-0.0993994	-2700
-0.114699	-0.123233	-2700
-0.102291	-0.147801	-2700
-0.174685	-0.112904	-2700
-0.153668	-0.13614	-2700
-0.11269	-0.169693	-2700
-0.171704	-0.150196	-2700
-0.286487	-0.0985749	-2700
-0.107259	-0.193994	-2700
-0.180183	-0.163584	-2700
-0.151833	-0.186541	-2700
-0.1812	-0.182457	-2700
-0.188306	-0.192962	-2700
-0.146501	-0.214264	-2700
-0.192978	-0.203019	-2700
-0.166774	-0.230443	-2700
-0.158773	-0.245967	-2700
-0.189027	-0.239085	-2700
-0.174996	-0.247453	-2700
-0.23825	-0.218646	-2700
-0.32874	-0.186132	-2700
-0.230923	-0.253686	-2700
0.304256	0.328848	-2640
0.402281	0.26057	-2640
0.322213	0.28617	-2640
0.231806	0.343513	-2640
0.380937	0.230353	-2640
0.343045	0.251383	-2640
0.314688	0.267526	-2640
0.235965	0.304989	-2640
0.217927	0.313625	-2640
0.304222	0.245206	-2640
0.314761	0.236617	-2640
0.402394	0.165691	-2640
0.2183	0.286426	-2640
0.205598	0.280632	-2640
0.351947	0.175759	-2640
0.323797	0.194073	-2640
0.227508	0.247176	-2640
0.273623	0.217597	-2640
0.149743	0.296117	-2640
0.170182	0.271492	-2640
0.206756	0.233955	-2640
0.173815	0.258803	-2640
0.22315	0.222994	-2640
0.152198	0.272298	-2640
0.163489	0.261605	-2640
0.387497	0.0941535	-2640
0.150727	0.249293	-2640
0.342786	0.119169	-2640
0.197261	0.208161	-2640
0.105364	0.271579	-2640
0.294468	0.130735	-2640
0.13253	0.240481	-2640
0.334396	0.0949331	-2640
0.268067	0.139063	-2640
0.211047	0.178562	-2640
0.256936	0.145931	-2640
0.181852	0.196204	-2640
0.187913	0.189423	-2640
0.147514	0.217099	-2640
0.150388	0.203758	-2640
0.0958296	0.245804	-2640
0.334103	0.0607773	-2640
0.359532	0.041952	-2640
0.15953	0.183428	-2640
0.16275	0.172748	-2640
0.279458	0.0838906	-2640
0.288247	0.0676999	-2640
0.10054	0.197615	-2640
0.153355	0.157297	-2640
0.261534	0.0812022	-2640
0.0672398	0.21474	-2640
0.138545	0.159071	-2640
0.108072	0.177842	-2640
0.255472	0.0701866	-2640
0.246923	0.0767866	-2640
0.0848315	0.190693	-2640
0.173994	0.12429	-2640
0.288068	0.035883	-2640
0.141685	0.13913	-2640
0.12414	0.150435	-2640
0.206916	0.0892606	-2640
0.103634	0.152673	-2640
0.0502003	0.193032	-2640
0.222824	0.0678746	-2640
0.25359	0.044432	-2640
0.125278	0.132221	-2640
0.127427	0.120889	-2640
0.0463147	0.176021	-2640
0.0459753	0.159736	-2640
0.0848315	0.127536	-2640
0.100314	0.114148	-2640
0.198326	0.0400231	-2640
0.041757	0.150361	-2640
0.0861089	0.11599	-2640
0.161972	0.0523493	-2640
0.0727422	0.109343	-2640
0.105144	0.0823246	-2640
0.116183	0.0659256	-2640
0.141552	0.0419789	-2640
0.100128	0.054211	-2640
0.0437597	0.0703412	-2640
0.000419167	0.0688693	-2640
0.0669071	0.0101553	-2640
0.0546847	0.0132402	-2640
0.269551	-0.00190638	-2640
0.276045	-0.040251	-2640
0.231121	-0.00829558	-2640
0.306691	-0.119488	-2640
0.197361	-0.0122688	-2640
0.20822	-0.0275387	-2640
0.180654	-0.0498679	-2640
0.177008	-0.109447	-2640
0.0776391	-0.0346451	-2640
0.202391	-0.164345	-2640
0.207129	-0.195423	-2640
0.180967	-0.211391	-2640
0.0744388	-0.123452	-2640
0.0506261	-0.113184	-2640
-0.139259	0.340559	-2640
-0.19782	0.304332	-2640
-0.073536	0.169231	-2640
-0.0565604	0.0982926	-2640
-0.186515	0.205013	-2640
-0.205595	0.199809	-2640
-0.281757	0.238026	-2640
-0.279079	0.21325	-2640
-0.0946529	0.0489147	-2640
-0.29051	0.18041	-2640
-0.134581	0.043175	-2640
-0.338989	0.0959313	-2640
-0.3663	0.0254019	-2640
-0.109815	-0.000540072	-2640
-0.091795	-0.0275366	-2640
-0.12159	-0.00201816	-2640
-0.0810053	-0.0504754	-2640
-0.116203	-0.0549807	-2640
-0.141214	-0.0593013	-2640
-0.15384	-0.0937522	-2640
-0.160675	-0.116712	-2640
-0.142244	-0.132964	-2640
-0.156839	-0.139864	-2640
-0.213318	-0.110423	-2640
-0.203483	-0.123222	-2640
-0.172464	-0.142195	-2640
-0.16657	-0.166612	-2640
-0.215997	-0.140667	-2640
-0.198021	-0.152066	-2640
-0.155556	-0.189139	-2640
-0.197611	-0.167188	-2640
-0.170815	-0.188442	-2640
-0.250597	-0.137846	-2640
-0.197409	-0.184037	-2640
-0.323797	-0.101868	-2640
-0.163973	-0.211275	-2640
-0.235009	-0.167657	-2640
-0.248582	-0.168353	-2640
-0.335818	-0.174109	-2640
-0.253373	-0.241156	-2640
0.0528096	0.0172181	-2580
0.0939112	0.0058788	-2580
0.0252307	0.0372711	-2580
0.0826434	0.0277965	-2580
0.0560185	0.0351508	-2580
0.0326958	0.0430395	-2580
0.101016	0.0271517	-2580
0.164466	0.0218073	-2580
0.0221352	0.0711788	-2580
0.0866395	0.0589042	-2580
0.0451577	0.0922484	-2580
0.144533	0.0606759	-2580
0.308432	0.00736012	-2580
0.182939	0.0510212	-2580
0.174553	0.0540884	-2580
0.14558	0.0677863	-2580
0.215955	0.046252	-2580
0.306224	0.0228181	-2580
0.196875	0.0680651	-2580
0.0632034	0.108903	-2580
0.112324	0.0936483	-2580
0.187969	0.0727472	-2580
0.246496	0.0518752	-2580
0.179917	0.0760236	-2580
0.156981	0.0856725	-2580
0.0981874	0.104668	-2580
0.0708353	0.116617	-2580
0.110829	0.104808	-2580
0.193886	0.0825472	-2580
0.186528	0.0903081	-2580
0.259965	0.0666303	-2580
0.143805	0.104662	-2580
0.229504	0.0834011	-2580
0.156141	0.105627	-2580
0.38281	0.0357549	-2580
0.215748	0.0848999	-2580
0.117567	0.119592	-2580
0.253621	0.0746875	-2580
0.137221	0.115647	-2580
0.319639	0.0538967	-2580
0.297818	0.0636037	-2580
0.0920432	0.130745	-2580
0.112717	0.126162	-2580
0.274302	0.0730784	-2580
0.186748	0.112836	-2580
0.127287	0.13455	-2580
0.173919	0.120748	-2580
0.278264	0.0894658	-2580
0.118194	0.144205	-2580
0.349407	0.0680593	-2580
0.318946	0.0808683	-2580
0.226002	0.116699	-2580
0.240392	0.116461	-2580
0.249618	0.133563	-2580
0.251379	0.153801	-2580
0.347859	0.123007	-2580
0.295563	0.139058	-2580
0.281487	0.150996	-2580
0.121043	0.217638	-2580
0.321387	0.157211	-2580
0.206935	0.194024	-2580
0.195201	0.19906	-2580
0.223607	0.195336	-2580
0.311734	0.166337	-2580
0.186535	0.209389	-2580
0.385425	0.145053	-2580
0.0779669	0.247938	-2580
0.161718	0.220292	-2580
0.181905	0.214443	-2580
0.106233	0.247032	-2580
0.100109	0.253276	-2580
0.22344	0.209638	-2580
0.160937	0.230766	-2580
0.325103	0.17989	-2580
0.205081	0.219851	-2580
0.382656	0.163752	-2580
0.116393	0.256181	-2580
0.248344	0.216249	-2580
0.0804152	0.275217	-2580
0.317044	0.199554	-2580
0.211178	0.236349	-2580
0.120943	0.272801	-2580
0.175947	0.258423	-2580
0.31497	0.215448	-2580
0.273915	0.236703	-2580
0.115319	0.291878	-2580
0.131457	0.295282	-2580
0.154453	0.289165	-2580
0.277984	0.264389	-2580
0.391182	0.263111	-2580
0.32511	0.293504	-2580
0.272214	0.319088	-2580
0.289472	0.361262	-2580
0.0920098	-0.192889	-2580
0.220632	-0.247672	-2580
0.0335897	-0.0666536	-2580
0.0820096	-0.0659355	-2580
0.109362	-0.0818318	-2580
0.0984676	-0.069352	-2580
0.16512	-0.0757605	-2580
0.24769	-0.101101	-2580
0.201425	-0.0556317	-2580
0.272507	-0.0895678	-2580
0.214481	-0.0494951	-2580
0.254521	-0.0551312	-2580
0.316611	-0.0900466	-2580
0.214621	-0.00242634	-2580
0.328285	-0.0482113	-2580
0.307678	-0.00978152	-2580
0.338419	-0.0145472	-2580
-0.3511	0.126697	-2580
-0.212439	0.0324136	-2580
-0.13338	0.0331677	-2580
-0.308807	0.177417	-2580
-0.238881	0.140597	-2580
-0.359947	0.237645	-2580
-0.0709333	0.0709195	-2580
-0.0389872	0.0543874	-2580
-0.297554	0.248647	-2580
-0.321429	0.279064	-2580
-0.0203468	0.0789933	-2580
-0.29893	0.303877	-2580
-0.317363	0.320025	-2580
-0.268575	0.292595	-2580
-0.00092241	0.149868	-2580
-0.0514935	0.185417	-2580
-0.188756	-0.315973	-2580
-0.229357	-0.300972	-2580
-0.261795	-0.273129	-2580
-0.30448	-0.257309	-2580
-0.168793	-0.26882	-2580
-0.226344	-0.235376	-2580
-0.160845	-0.231375	-2580
-0.172191	-0.214344	-2580
-0.0831168	-0.240036	-2580
-0.222554	-0.192331	-2580
-0.157632	-0.201926	-2580
-0.113372	-0.196674	-2580
-0.162744	-0.182972	-2580
-0.189817	-0.161342	-2580
-0.167925	-0.166196	-2580
-0.320315	-0.114336	-2580
-0.2552	-0.135079	-2580
[truncated: 10,694 more rows]
