# Supplementary material for: Spinal premotor interneurons controlling antagonistic muscles are spatially intermingled
Source: eLife. 2022 Dec 13;11:e81976. doi: 10.7554/eLife.81976 (PMC9844990; doi:10.7554/eLife.81976)
Supplement: Figure 12—figure supplement 13—source data 3. [file elife-81976-fig12-figsupp13-data3.xlsx]

## Sheet: Sheet1
0.107671	0.0800102	-4800.35
0.0784305	0.150185	-4803.93
0.0550477	0.170525	-4805.11
0.133653	0.188624	-4805.22
-0.17121	-0.0872078	-4790.87
0.137361	0.0978778	-4796.14
0.16431	0.117444	-4796.8
0.0398762	0.148659	-4799.45
0.145322	0.153588	-4798.68
0.484553	-0.0635863	-4790.37
0.337782	-0.0356439	-4792.92
0.48137	-0.00883919	-4792.67
0.235113	0.0270893	-4796.65
0.46806	-0.105601	-4784.01
0.47245	-0.0404321	-4786.67
-0.128106	-0.118636	-4004.03
-0.0594905	-0.0759368	-4001.45
0.0583069	-0.0300813	-3997.26
0.261356	-0.111432	-3990.31
0.216147	-0.073042	-3992.35
0.242061	-0.0236589	-3990.97
0.205311	0.0518062	-3992.23
0.145135	0.0792734	-3994.78
0.0776011	0.112377	-3996.6
0.0372343	0.159614	-3998.48
0.0667456	0.176985	-3997.47
0.121703	0.275701	-3995.09
0.169113	0.238868	-3993.96
0.0959763	0.121029	-3995.97
0.112857	0.174813	-3995.89
0.193366	0.0647856	-3992.64
-0.155835	0.261712	-3197.61
-0.147059	0.0111655	-3192.85
-0.020213	0.0854427	-3192.85
0.122223	0.0392586	-3192.85
0.126045	0.0543253	-3192.85
0.135599	0.0254474	-3192.85
0.184327	0.0731589	-3192.85
0.195793	0.0580921	-3192.85
0.212991	-0.0826479	-3192.85
0.288471	-0.0865382	-3192.85
0.205948	0.132422	-3197.61
0.161396	0.114592	-3192.85
0.133688	0.102037	-3192.85
0.325815	-0.0363323	-3197.61
0.254853	0.0152287	-3197.61
0.111973	0.0429521	-3197.61
0.0639404	0.351894	-3192.85
0.15992	0.264738	-3197.61
0.109801	0.228849	-3192.85
0.0811385	0.269027	-3192.85
0.0515596	0.277339	-3197.61
0.075533	0.206771	-3197.61
0.00265392	0.184088	-3197.61
0.107177	0.201731	-3197.61
-0.320963	0.0610028	-2392.85
-0.142729	-0.151554	-2392.85
0.219047	-0.136552	-2397.61
0.238747	-0.132878	-2392.85
0.297555	-0.201867	-2392.85
0.307179	-0.247489	-2392.85
0.33284	-0.237474	-2392.85
0.373471	-0.155133	-2392.85
0.290908	-0.00595921	-2397.61
0.253717	-0.00825373	-2392.85
0.21583	-0.00261071	-2397.61
0.158555	-0.0460862	-2392.85
0.00351478	-0.0449735	-2392.85
0.1222	-0.0249446	-2392.85
0.147862	0.00510358	-2392.85
0.21583	0.0438158	-2397.61
0.157485	0.22592	-2392.85
0.102138	0.323908	-2397.61
0.11866	0.070705	-2392.85
0.120752	0.109266	-2392.85
0.0499669	0.0841781	-2392.85
0.0684129	0.0450945	-2397.61
0.0524077	0.105549	-2392.85
0.176458	0.0304727	-2392.85
-0.18569	-0.183628	-1592.85
-0.131394	-0.159764	-1592.85
-0.175887	-0.132116	-1597.61
-0.185157	-0.0842413	-1597.61
-0.0889743	-0.0498314	-1597.61
-0.0750679	-0.0513275	-1597.61
0.00674492	-0.078473	-1597.61
0.0251764	-0.0490334	-1597.61
0.187272	-0.233665	-1592.85
0.197564	-0.119432	-1597.61
0.217081	-0.0823128	-1597.61
0.220778	-0.0537457	-1592.85
0.214293	-0.0665059	-1592.85
0.36345	-0.112442	-1592.85
0.374259	-0.137963	-1592.85
0.393714	-0.0333294	-1592.85
0.313574	-0.078473	-1597.61
0.0717971	0.0621757	-1597.61
0.109745	0.0333082	-1597.61
0.101885	0.0694038	-1592.85
0.0858914	0.0886376	-1597.61
0.114855	0.10058	-1592.85
0.131068	0.108974	-1592.85
0.323459	0.128159	-1592.85
0.36237	0.191711	-1592.85
0.199733	0.231772	-1597.61
0.160251	0.225286	-1592.85
0.098382	0.216958	-1592.85
0.0567192	0.189498	-1597.61
0.0275581	0.164284	-1597.61
0.0434939	0.135296	-1592.85
0.0828788	0.14335	-1597.61
-0.109572	-0.221081	-797.615
-0.137423	-0.194144	-788.075
-0.192159	-0.119495	-797.615
-0.177437	-0.0362787	-788.075
-0.0936966	-0.109064	-792.845
-0.170479	-0.180447	-797.615
0.343528	-0.178265	-788.075
0.377875	-0.173061	-788.075
0.385161	-0.223368	-788.075
0.208262	-0.0954703	-797.615
0.193105	-0.0578252	-792.845
0.250528	-0.0108427	-792.845
0.285242	-0.0863252	-788.075
0.323752	-0.0047938	-788.075
0.372681	-0.0317238	-792.845
0.338324	0.0176624	-788.075
0.247773	0.0370329	-788.075
0.275585	0.0444655	-792.845
0.213986	0.00851917	-792.845
0.173702	0.0129652	-797.615
0.256099	0.0660885	-788.075
0.24465	0.0757734	-788.075
0.257836	0.11733	-792.845
0.270671	0.0854586	-788.075
0.265863	0.165966	-797.615
0.325557	0.185457	-797.615
0.329998	0.132916	-788.075
0.242823	0.187406	-797.615
0.20614	0.184248	-788.075
0.247012	0.217616	-797.615
0.202501	0.307749	-792.845
0.24361	0.308218	-788.075
0.224426	0.320378	-792.845
-0.157059	0.279755	-797.615
-0.0679678	0.148622	-792.845
-0.0176936	0.189791	-797.615
0.251572	0.164935	-792.845
0.111669	0.144533	-792.845
0.0886999	0.256258	-792.845
0.0292005	0.225894	-788.075
0.0427618	0.266945	-792.845
0.123915	0.237516	-788.075
0.115845	0.171736	-792.845
-0.115757	-0.14651	7.15503
-0.0673572	-0.0707542	2.38501
-0.18124	-0.0191403	7.15503
-0.175627	0.00218459	7.15503
-0.136337	0.0236853	7.15503
-0.230635	0.26651	2.38501
-0.0194028	-0.0749543	7.15503
0.0162892	-0.0456041	7.15503
-0.0371768	-0.0277271	7.15503
0.166166	-0.0481115	7.15503
0.222369	-0.0819626	7.15503
0.282982	-0.122351	2.38501
0.341107	-0.169759	6.7583
0.332201	-0.124866	2.38501
0.25181	-0.38913	7.15503
0.291036	-0.0858794	2.38501
0.294631	-0.0568876	7.15503
0.262515	-0.0217829	7.15503
0.265191	0.0147731	7.15503
0.289278	-0.0054842	7.15503
0.288387	0.0523117	7.15503
0.277612	0.0665427	2.38501
0.258947	0.0759472	7.15503
0.252702	0.127389	7.15503
0.299984	0.0874622	2.38501
0.291955	0.221931	7.15503
0.229507	0.245566	7.15503
0.180964	0.271554	2.38501
0.220585	0.120438	7.15503
0.191145	0.0954117	7.15503
0.129838	0.0985307	7.15503
0.0539989	0.141771	7.15503
0.0502994	0.181169	7.15503
0.0338135	0.128047	2.38501
0.0330351	0.311852	7.15503
0.0502994	0.293595	7.15503
0.176082	0.164834	7.15503
0.110108	0.180208	7.15503
0.139704	0.121593	7.15503
0.100242	0.125436	7.15503
0.0734522	0.136735	2.38501
0.209994	0.0841171	7.15503
0.076196	0.180208	7.15503
-0.0845415	-0.225799	807.155
-0.0653578	-0.172923	802.385
0.346903	-0.139718	807.155
0.357256	-0.0776374	807.155
0.397724	-0.0944511	807.155
0.39396	-0.160412	807.155
0.362902	-0.157825	807.155
0.437145	0.0132527	803.521
0.262203	0.0331903	807.155
0.328081	0.256385	807.155
0.264085	0.299985	807.155
0.0657294	0.507051	806.487
0.152699	0.434047	802.385
0.244901	0.474632	807.155
0.206412	0.510576	804.958
0.220384	0.474632	807.155
0.328825	0.422624	807.155
0.351455	0.162588	807.155
0.287334	0.0668949	807.155
0.306193	0.0367307	807.155
0.282619	-0.0553171	807.155
0.243015	-0.0643884	807.155
0.262817	-0.147325	807.155
0.34014	0.000325647	807.155
0.352399	0.0648147	807.155
0.377858	0.134504	807.155
0.363714	0.202114	807.155
0.290163	0.161548	807.155
0.27979	0.134504	807.155
0.269418	0.156347	807.155
0.285448	0.180271	807.155
0.284505	0.195873	807.155
0.277904	0.216676	807.155
0.240186	0.267643	807.155
0.243958	0.212515	807.155
-0.32679	0.250681	805.614
-0.202682	0.0695402	807.155
-0.172695	0.108111	807.155
-0.118343	0.117013	807.155
0.00821712	0.443427	807.155
0.147775	0.381019	807.155
0.233861	0.111965	807.155
0.197702	0.0417189	807.155
0.195003	0.124467	807.155
0.173956	0.23936	807.155
0.169638	0.297105	807.155
0.116749	0.317345	807.155
0.0250026	0.300677	807.155
0.0579234	0.216143	807.155
0.0832888	0.21912	807.155
0.107574	0.274483	807.155
0.121606	0.262577	807.155
0.142114	0.25722	807.155
0.154527	0.307821	807.155
0.131321	0.334609	807.155
0.0606218	0.338776	807.155
0.0384947	0.24948	807.155
0.0919234	0.259005	807.155
0.0368757	0.198879	807.155
0.056844	0.164947	807.155
0.0649393	0.145898	807.155
0.0973204	0.153041	807.155
0.165861	0.0821995	807.155
0.130781	0.110774	807.155
0.114051	0.123871	807.155
0.116749	0.154827	807.155
0.108114	0.210786	807.155
0.0954926	0.20081	807.155
0.129411	0.208862	807.155
0.143436	0.24154	807.155
0.154743	0.210914	807.155
0.0894818	0.182656	807.155
0.0979255	0.16829	807.155
0.151594	0.177762	807.155
0.185725	0.16875	804.411
0.178267	0.226226	805.405
0.187856	0.269862	802.726
0.197444	0.280357	804.849
0.266691	0.130724	806.844
0.246449	0.0858949	806.249
0.227273	0.146709	805.178
0.211293	0.114938	804.794
0.225142	0.0408986	805.818
0.193182	0.0930432	806.333
0.209162	0.224255	806.059
0.224077	0.169194	804.989
0.17081	0.256943	805.206
-0.1498	-0.141356	1607.16
-0.11651	-0.206281	1607.16
-0.0904195	-0.379412	1607.16
0.0375574	-0.246701	1607.16
0.288487	-0.326677	1607.16
0.319028	-0.307373	1607.16
0.338013	-0.294963	1607.16
0.373677	-0.281381	1606.33
0.303345	-0.174999	1607.16
0.207203	-0.137373	1607.16
0.281372	-0.179988	1607.16
0.287714	-0.0714764	1603.77
0.251137	-0.0166292	1607.16
0.19681	0.000599545	1607.16
0.166103	0.000599545	1607.16
0.144844	-0.00636983	1607.16
0.17933	-0.08292	1607.16
0.295189	0.0703608	1606.59
0.299861	0.0842051	1602.41
0.285846	0.0737518	1603.63
0.332564	0.106251	1602.68
0.203896	0.152979	1607.16
0.213816	0.156207	1607.16
0.146262	0.102616	1607.16
0.173189	0.142001	1607.16
0.225154	0.0787259	1607.16
0.235075	0.0541903	1607.16
0.217123	0.0315917	1607.16
0.176024	0.0419225	1607.16
0.169409	0.0348202	1607.16
0.141065	0.0354658	1607.16
0.146734	0.0645211	1607.16
0.186889	0.0716234	1607.16
0.183582	0.0890563	1607.16
0.204841	0.103907	1607.16
0.211927	0.127797	1607.16
0.218541	0.178159	1607.16
0.241689	0.174285	1607.16
0.198699	0.180742	1607.16
0.213816	0.206569	1607.16
0.126847	0.138989	1607.16
0.132342	0.234756	1607.16
0.159133	0.272312	1607.16
0.135777	0.288274	1607.16
0.133897	0.348219	1604.47
0.14759	0.332894	1605.42
0.284237	0.313738	1606.73
-0.00544417	0.570572	1603.16
0.0020516	0.580645	1602.87
0.00909507	0.533756	1602.39
0.0329784	0.497615	1607.16
0.00570528	0.492805	1607.16
-0.0455643	0.517751	1607.16
0.0743282	0.519259	1607.16
0.0892841	0.518056	1607.16
0.115678	0.512044	1607.16
0.149109	0.469958	1607.16
0.14823	0.444707	1607.16
0.170411	0.172636	1607.16
0.152772	0.157476	1607.16
0.149763	0.194674	1607.16
0.0938343	0.232561	1607.16
0.0802259	0.236004	1607.16
0.0474637	0.242197	1607.16
0.0333517	0.238057	1607.16
0.0388899	0.263569	1607.16
0.0625809	0.278059	1607.16
0.0529969	0.310477	1607.16
0.0469427	0.327726	1607.16
0.0267808	0.297361	1607.16
0.00306322	0.342206	1607.16
0.0191974	0.354635	1607.16
0.0253093	0.169142	1607.16
0.0434487	0.162948	1607.16
0.0676318	0.163646	1607.16
0.0983598	0.118896	1607.16
0.0666275	0.123704	1607.16
0.0741836	0.112003	1607.16
0.0842566	0.109253	1607.16
0.0903007	0.112697	1607.16
0.1044	0.0886113	1607.16
0.136625	0.0714195	1607.16
0.0751932	0.0555728	1607.16
0.109937	0.0686576	1607.16
0.111689	0.207891	1607.16
0.128114	0.195661	1607.16
0.0968831	0.162309	1607.16
0.0835462	0.189197	1607.16
0.067452	0.173631	1607.16
0.0883767	0.246025	1607.16
0.103718	0.246983	1607.16
0.113847	0.288491	1607.16
