# Supplementary material for: Spinal premotor interneurons controlling antagonistic muscles are spatially intermingled
Source: eLife. 2022 Dec 13;11:e81976. doi: 10.7554/eLife.81976 (PMC9844990; doi:10.7554/eLife.81976)
Supplement: Figure 12—figure supplement 13—source data 4. [file elife-81976-fig12-figsupp13-data4.xlsx]

## Sheet: Sheet1
-0.209119	-0.0342357	-4797.61
-0.119052	-0.15469	-4792.85
0.279667	-0.134395	-4792.85
0.296901	-0.090099	-4792.85
0.0691554	0.103724	-4792.85
0.168871	0.105036	-4792.85
0.0965571	0.169552	-4797.61
0.018682	0.279555	-4792.85
0.0137577	0.157523	-4792.85
-0.040037	0.0818532	-4797.61
-0.180627	0.246124	-3992.84
0.302317	-0.174891	-3997.61
0.313843	0.120789	-3997.61
0.296926	0.109772	-3988.07
0.219749	0.147825	-3992.84
0.199726	0.272389	-3997.61
0.227793	0.0753297	-3992.84
0.131716	0.105999	-3997.61
0.0440058	0.164005	-3997.61
0.0618219	0.139864	-3992.84
0.108112	0.174221	-3988.07
0.145766	0.202063	-3997.61
0.141203	0.164981	-3997.61
0.131164	0.214749	-3997.61
-0.170483	-0.118922	-3188.07
0.325201	-0.0973094	-3188.07
0.372145	0.0358998	-3188.07
0.269376	0.0246701	-3188.07
0.313783	0.0316886	-3188.07
0.202133	0.0134404	-3188.07
0.198327	0.0457258	-3188.07
0.219895	0.0569556	-3188.07
0.259227	0.0709927	-3188.07
0.282064	0.148197	-3188.07
0.274452	0.177675	-3188.07
0.166608	0.19452	-3188.07
0.0345324	0.132907	-3188.07
0.0439993	0.141727	-3188.07
0.0679155	0.122433	-3188.07
0.0365255	0.171496	-3188.07
-0.0887828	-0.173199	-2392.85
0.218116	-0.0731925	-2392.85
0.119268	0.0188548	-2392.85
0.195875	0.127161	-2392.85
0.321084	0.215777	-2392.85
0.148922	0.173111	-2392.85
0.125034	0.185144	-2392.85
0.0681953	0.303297	-2392.85
0.0277968	0.219202	-2392.85
0.025858	0.156376	-2392.85
0.0669593	0.111059	-2392.85
0.0661838	0.199634	-2392.85
0.0948775	0.212508	-2392.85
-0.155923	-0.0479148	-1595.97
-0.112425	-0.00665957	-1592.85
-0.0919006	-0.109805	-1592.85
0.369157	0.0493665	-1592.85
0.159948	0.0715148	-1592.85
-0.0212027	0.119971	-1592.85
-0.107631	-0.199202	-1595.71
0.154675	0.135085	-1592.85
0.128172	0.117481	-1592.85
0.180197	0.135713	-1592.85
0.220442	0.262084	-1592.85
0.162528	0.21053	-1592.85
0.316771	-0.130907	-1595.87
0.244	0.0319762	-1592.85
0.24989	0.0552386	-1592.85
0.328467	0.074001	-1595.31
0.323594	0.0487663	-1595.53
0.0363927	0.152688	-1592.85
0.0486626	0.175951	-1592.85
0.0736934	0.159604	-1592.85
0.0849818	0.270257	-1592.85
0.011672	0.221827	-1597.61
0.0957793	0.189782	-1592.85
-0.155933	-0.183988	-797.615
-0.134943	-0.108728	-797.615
-0.120995	-0.101226	-792.845
-0.198355	-0.0907532	-792.845
-0.0865767	-0.0247175	-797.615
-0.102091	0.0064724	-797.615
-0.0263459	0.168364	-797.615
0.0374412	0.0212095	-792.845
0.21983	0.0132595	-792.845
0.350622	0.0277978	-794.646
0.279483	-0.00520686	-792.845
0.300809	0.172395	-792.845
0.341601	0.156651	-793.849
0.394827	0.177139	-794.287
0.30757	0.267614	-792.845
0.209786	0.149723	-792.845
0.139568	0.093044	-792.845
0.1869	0.0514801	-792.845
0.156212	0.0280528	-792.845
0.0371019	0.180707	-792.845
0.0584275	0.187509	-792.845
0.242796	0.239762	-797.615
0.0799152	0.173415	-797.615
0.0838708	0.135279	-797.615
0.0911061	0.169828	-792.845
0.107889	0.169828	-792.845
0.0703947	0.230531	-792.845
0.155382	0.159971	-792.845
0.12253	0.225861	-792.845
0.0925345	0.195251	-792.845
0.115745	0.130917	-792.845
-0.135316	-0.143204	7.15497
-0.151457	-0.200686	7.15497
0.155919	-0.151274	7.15497
0.245662	-0.311586	5.26794
0.36189	-0.37696	5.70886
0.327452	-0.133304	4.47229
0.347254	-0.0877641	4.8158
0.26288	-0.0459086	6.09534
0.206054	-0.118579	7.15497
0.179249	-0.120396	7.15497
0.192155	-0.0540976	7.15497
0.161876	-0.00687187	7.15497
0.167832	0.00700594	7.15497
0.204565	0.0277406	7.15497
0.255993	0.0410773	5.77991
0.230165	0.170994	3.10803
0.224138	0.065925	3.35437
0.246523	-0.0195357	5.9054
0.171804	0.101254	7.15497
0.17776	0.122931	7.15497
0.170314	0.0692098	7.15497
0.128122	0.0371653	7.15497
0.106281	0.0465901	7.15497
0.0779873	0.0805195	7.15497
0.0571394	0.127644	7.15497
0.0248748	0.111622	7.15497
0.0109761	0.110679	7.15497
0.00487454	0.269645	2.38501
0.00548509	0.316529	6.12488
0.15989	0.219065	7.15497
0.174285	0.231317	7.15497
0.203075	0.211524	7.15497
0.16535	0.274672	7.15497
0.0715342	0.17571	7.15497
0.110252	0.17948	7.15497
0.12018	0.176653	7.15497
0.099332	0.163459	7.15497
0.0692117	0.227032	2.38501
0.11472	0.128586	7.15497
-0.080104	-0.222879	802.385
-0.107083	-0.197098	807.155
-0.0622478	0.0256898	802.385
0.271868	-0.132204	803.252
0.259688	-0.177436	806.584
0.215982	-0.17655	804.63
0.21025	-0.154242	806.108
0.214549	-0.204077	804.339
0.204519	-0.225156	804.929
0.195921	-0.265177	805.886
0.189473	-0.285241	805.923
0.215266	-0.31062	805.789
0.234611	-0.356635	803.299
0.299811	-0.401249	802.746
0.283332	-0.16171	805.098
0.29193	-0.104647	804.436
0.309125	-0.107745	806.914
0.302677	-0.14057	805.075
0.322022	-0.182856	805.055
0.324171	-0.145785	806.229
0.339934	-0.119371	806.536
0.336351	-0.217718	805.23
0.324171	-0.0665793	806.229
0.347099	-0.0359393	805.767
0.32847	0.0175751	803.301
0.319156	0.0372033	804.659
0.30411	0.0489465	803.401
0.246791	0.00455577	806.676
0.198787	-0.0496869	806.493
0.235327	0.00684856	807.031
0.293363	0.0940926	804.654
0.281899	0.0998647	804.875
0.248224	0.104197	806.917
0.276167	0.19061	803.962
0.346382	0.169175	806.504
0.299094	0.206508	805.503
0.246791	0.265341	806.676
0.250374	0.283564	803.889
0.235327	0.377634	807.031
0.210967	0.286736	804.924
0.151643	-0.0190966	807.155
0.204519	0.0905708	804.929
0.180158	0.0940002	805.297
0.180875	0.126201	806.996
0.168694	0.167691	802.42
0.174426	0.174852	807.074
0.172277	0.211278	804.965
0.146399	0.0597578	802.385
0.133068	0.0568994	807.155
0.125595	0.0815447	807.155
0.11121	0.0693531	802.385
0.108271	0.0465643	807.155
0.071246	0.0203291	807.155
0.0524471	0.106135	802.385
-0.0849098	0.351764	804.534
0.0563002	0.363772	807.155
0.0702126	0.228475	802.385
0.0858524	0.244522	807.155
0.139862	0.214311	807.155
0.147675	0.194436	807.155
0.147082	0.180498	802.385
0.137516	0.192492	802.385
0.125559	0.157309	802.385
0.10997	0.201591	807.155
0.100459	0.222261	807.155
0.0950238	0.208746	807.155
0.0957034	0.236572	807.155
0.0957034	0.271552	807.155
0.10929	0.256447	807.155
0.0851732	0.269167	807.155
0.0773606	0.277912	807.155
0.0715858	0.263602	807.155
0.0855865	0.183696	802.385
0.0903694	0.178899	802.385
0.0794368	0.15651	802.385
0.0780397	0.180126	807.155
0.0681892	0.14276	807.155
0.107932	0.141966	807.155
0.104195	0.153891	807.155
0.110989	0.174561	807.155
0.0984209	0.132425	807.155
0.13103	0.103805	807.155
0.14122	0.11732	807.155
0.15084	0.218079	802.385
0.139566	0.246865	802.385
0.128292	0.248464	802.385
0.130342	0.286046	802.385
0.179539	0.29724	802.385
0.172132	0.242137	807.155
0.178585	0.250882	807.155
0.223147	0.223839	806.806
0.269719	0.19202	806.741
0.155147	0.348668	807.155
0.132392	0.35881	802.385
0.122198	0.396368	807.155
0.137858	0.409984	802.385
0.165873	0.429175	802.385
0.169631	0.403587	802.385
0.229595	0.387963	805.056
0.101644	0.39799	802.385
0.0842196	0.445966	802.385
0.069529	0.457161	802.385
0.0623544	0.464358	802.385
0.078407	0.563228	803.135
0.0951527	0.465957	802.385
0.103694	0.445166	802.385
0.156871	0.146881	802.385
0.149443	0.165481	807.155
-0.132645	-0.301311	1602.39
-0.156365	-0.201673	1602.39
-0.130638	-0.158071	1607.15
-0.119995	-0.162683	1602.39
-0.0812515	-0.171347	1602.39
-0.177134	0.00763464	1607.15
0.0297816	-0.0463672	1607.15
0.289171	-0.199485	1605.6
0.323824	-0.174635	1606.38
0.381578	-0.20087	1606.43
0.367362	-0.0376215	1607
0.324712	-0.0157129	1605.72
0.335375	0.0223388	1604.47
0.308719	0.0664383	1604.28
0.259991	0.0441951	1607.15
0.205214	0.015594	1607.15
0.0919603	0.0386949	1607.15
0.0682733	0.00679373	1607.15
0.0171979	0.104697	1607.15
0.113427	0.111298	1607.15
0.121569	0.126698	1607.15
0.151178	0.122298	1607.15
0.234823	0.103598	1607.15
0.276731	0.120387	1604.77
0.270512	0.146617	1606.31
0.22372	0.135499	1607.15
0.300722	0.284861	1603.5
0.315827	0.311876	1605.69
0.187526	0.297831	1607.15
0.143212	0.317901	1607.15
0.137897	0.334989	1607.15
0.125472	0.294455	1607.15
0.105076	0.299887	1607.15
0.132157	0.269126	1602.39
0.0579899	0.25829	1607.15
0.0677245	0.230602	1607.15
0.118341	0.22491	1607.15
0.154734	0.225913	1607.15
0.136724	0.171335	1607.15
0.122895	0.176349	1602.39
0.0990206	0.160443	1607.15
0.0783214	0.217259	1602.39
0.109187	0.25333	1607.15
0.190653	0.185799	1607.15
0.179314	0.249001	1607.15
0.209203	0.191983	1606.17
0.289171	0.182129	1605.49
0.280286	0.179661	1605.95
0.161813	0.202763	1607.15
0.105667	0.207059	1602.39
0.202978	0.0569205	1607.15
