# Supplementary material for: Spinal premotor interneurons controlling antagonistic muscles are spatially intermingled
Source: eLife. 2022 Dec 13;11:e81976. doi: 10.7554/eLife.81976 (PMC9844990; doi:10.7554/eLife.81976)
Supplement: Figure 12—figure supplement 13—source data 5. [file elife-81976-fig12-figsupp13-data5.xlsx]

## Sheet: Sheet1
0.272992	0.0221251	-3420
0.315649	0.0132875	-3420
0.252095	0.0838096	-3420
0.16844	0.132424	-3420
0.141813	0.259637	-3420
0.182528	0.350522	-3420
0.251872	-0.120632	-3420
-0.178339	0.227745	-3420
-0.151836	-0.233431	-3420
-0.185717	-0.181825	-3420
-0.120903	-0.173305	-3420
-0.132591	-0.129905	-3420
-0.0432024	-0.102031	-3420
-0.123214	-0.0140009	-3420
0.0842272	0.101119	-3360
0.273806	0.335567	-3360
0.0514056	-0.158581	-3360
0.2391	-0.162874	-3360
-0.132116	-0.184716	-3360
0.14711	0.103155	-3300
0.258798	0.119117	-3300
0.283605	0.146362	-3300
0.30123	0.204306	-3300
0.169566	0.277146	-3300
0.190804	-0.190014	-3300
0.312637	-0.0495475	-3300
0.291645	-0.0398432	-3300
-0.0831569	0.0570036	-3300
-0.17143	-0.207735	-3300
-0.148321	-0.106316	-3300
-0.0873836	-0.0565296	-3300
-0.0678944	-0.00795819	-3300
0.0873933	0.0288962	-3240
0.15458	0.0402561	-3240
0.283009	0.00550188	-3240
0.192912	0.0690766	-3240
0.263452	0.0735554	-3240
0.235836	0.0889167	-3240
0.279731	0.06747	-3240
0.17231	0.140063	-3240
0.256507	0.0947596	-3240
0.108147	0.201432	-3240
0.121134	0.196597	-3240
0.107866	0.22197	-3240
0.12929	0.238271	-3240
0.273491	0.174491	-3240
0.175717	0.271168	-3240
0.415159	0.187769	-3240
0.126321	-0.173517	-3240
0.168074	-0.17533	-3240
0.0572449	-0.0486126	-3240
0.283316	-0.0572211	-3240
0.327225	-0.0774672	-3240
0.302482	-0.0213122	-3240
-0.153496	-0.226246	-3240
-0.18916	-0.11801	-3240
-0.134076	-0.145496	-3240
0.288706	0.00688492	-3180
0.326165	0.0148669	-3180
0.223084	0.0040099	-3180
0.209604	0.02959	-3180
0.0721417	0.0296278	-3180
0.31757	0.073487	-3180
0.278058	0.0737443	-3180
0.169552	0.0588547	-3180
0.243029	0.100822	-3180
0.206727	0.0990217	-3180
0.294469	0.172789	-3180
0.323288	0.18581	-3180
0.141583	0.182291	-3180
0.105358	0.237469	-3180
0.0942935	0.260431	-3180
0.13737	0.280761	-3180
0.175763	0.295514	-3180
0.293281	-0.0470445	-3180
-0.307039	0.00599364	-3180
-0.189666	-0.269464	-3180
-0.134239	-0.253036	-3180
-0.16069	-0.2569	-3180
-0.178913	-0.243979	-3180
-0.0935197	-0.2128	-3180
-0.0969262	-0.192749	-3180
-0.205797	-0.193828	-3180
-0.212393	-0.171582	-3180
-0.224424	-0.16596	-3180
-0.108777	-0.0856929	-3180
0.177435	0.0326383	-3120
0.115289	0.0819889	-3120
0.0304564	0.129581	-3120
0.249995	0.0489146	-3120
0.24204	0.0612308	-3120
0.0627517	0.143741	-3120
0.314265	0.050866	-3120
0.0639064	0.183299	-3120
0.0879408	0.231477	-3120
0.236481	0.178832	-3120
0.20112	-0.199667	-3120
0.331371	-0.0815507	-3120
0.275034	-0.0220928	-3120
0.281763	-0.00389744	-3120
-0.18305	-0.251088	-3120
-0.139093	-0.212743	-3120
-0.208257	-0.175048	-3120
-0.123487	-0.124643	-3120
-0.08764	-0.125265	-3120
0.0592504	0.0295272	-3060
0.0255764	0.0594029	-3060
0.1984	0.0094869	-3060
0.0570175	0.0869574	-3060
0.197193	0.0781118	-3060
0.319666	0.0363513	-3060
0.131263	0.138958	-3060
0.241333	0.114477	-3060
0.0997581	0.183381	-3060
0.227242	0.155192	-3060
0.0724493	0.24438	-3060
0.141876	0.242505	-3060
0.297818	0.195517	-3060
0.35162	0.215118	-3060
0.146599	0.36642	-3060
0.246011	-0.180815	-3060
0.274898	-0.167887	-3060
0.298479	-0.0238615	-3060
-0.0956915	0.0179365	-3060
-0.3103	0.151036	-3060
-0.166292	0.143635	-3060
-0.176959	-0.219221	-3060
-0.198445	-0.176848	-3060
-0.105681	-0.204902	-3060
-0.174169	-0.143331	-3060
-0.078016	-0.188683	-3060
-0.112851	-0.136506	-3060
-0.117507	-0.119548	-3060
0.169793	0.0726393	-3000
0.350755	0.0047984	-3000
0.125941	0.103229	-3000
0.227422	0.0698943	-3000
0.391463	0.032248	-3000
0.309301	0.0632542	-3000
0.155019	0.143169	-3000
0.231586	0.200552	-3000
0.279418	0.240745	-3000
0.120107	-0.00848016	-3000
-0.277263	0.0340305	-3000
-0.326769	0.203632	-3000
-0.213	-0.237614	-3000
-0.0806637	-0.160672	-3000
0.133698	0.404398	-2940
0.251223	0.327604	-2940
0.247345	0.244131	-2940
0.308882	0.20729	-2940
0.0719436	0.261684	-2940
0.321204	0.102017	-2940
0.261644	0.11868	-2940
0.105864	0.164111	-2940
0.216322	0.120611	-2940
0.180452	0.1249	-2940
0.303423	0.0629855	-2940
0.176186	0.0978454	-2940
0.254713	0.0632331	-2940
0.146341	0.0882763	-2940
0.0933168	0.103175	-2940
0.162234	0.0755071	-2940
0.190212	0.0545614	-2940
0.153879	0.049554	-2940
0.246309	0.0148241	-2940
0.0686109	0.0586528	-2940
0.0421738	0.0434263	-2940
0.0268051	0.00162168	-2940
0.252041	-0.129831	-2940
0.213929	-0.162387	-2940
-0.0515823	0.0406531	-2940
-0.145056	0.0440892	-2940
-0.0907285	-0.0851859	-2940
-0.137475	-0.0644144	-2940
-0.00132626	-0.147256	-2940
-0.162661	-0.0488969	-2940
-0.10174	-0.103914	-2940
-0.115126	-0.101636	-2940
-0.0427673	-0.144685	-2940
-0.072932	-0.135137	-2940
-0.121886	-0.136051	-2940
-0.14265	-0.154958	-2940
-0.104515	-0.195654	-2940
-0.131522	-0.188432	-2940
0.0745894	0.285073	-2880
0.0751869	0.233429	-2880
0.132989	0.173576	-2880
0.349601	0.0782312	-2880
0.305855	0.0878605	-2880
0.0358223	0.186305	-2880
0.341229	0.0580447	-2880
0.257705	0.0769603	-2880
0.0569486	0.138085	-2880
0.0609106	0.129128	-2880
0.227666	0.0496392	-2880
0.251858	0.04079	-2880
0.271662	0.00915858	-2880
0.0444933	0.0612522	-2880
0.041584	0.0311943	-2880
0.341841	-0.0406134	-2880
0.304482	-0.124074	-2880
-0.084516	-0.157462	-2880
-0.116429	-0.171583	-2880
-0.164018	-0.15879	-2880
-0.137616	-0.205056	-2880
0.125967	0.298644	-2820
0.195151	0.243414	-2820
0.361997	0.170162	-2820
0.235778	0.21735	-2820
0.279722	0.0641689	-2820
0.13237	0.121423	-2820
0.314135	0.0219569	-2820
0.158169	-0.250716	-2820
-0.187823	-0.143093	-2820
-0.17881	-0.14938	-2820
-0.17868	-0.23373	-2820
0.0622063	0.0247698	-2760
0.32184	0.0140307	-2760
0.280937	0.0444792	-2760
0.259843	0.0945108	-2760
0.254942	0.212441	-2760
0.257665	-0.109316	-2760
-0.15827	-0.224912	-2760
-0.109475	-0.25389	-2760
0.0309723	0.02643	-2700
0.0712101	0.0495159	-2700
0.309757	0.022268	-2700
0.311535	0.114783	-2700
0.306347	0.156548	-2700
0.118998	0.324805	-2700
0.200163	0.298183	-2700
0.207575	-0.281416	-2700
0.176341	-0.0341252	-2700
0.338587	-0.0612288	-2700
-0.165576	-0.227442	-2700
-0.115892	-0.174601	-2700
-0.117723	-0.150614	-2700
0.367135	0.11538	-2640
0.318026	0.16201	-2640
0.164157	0.26367	-2640
0.0157035	0.360402	-2640
0.184911	-0.266572	-2640
0.0413381	-0.0392496	-2640
0.200081	-0.112033	-2640
0.102019	-0.040159	-2640
0.250466	-0.0851333	-2640
0.277451	-0.0156323	-2640
-0.246298	-0.241073	-2640
-0.0729865	-0.149416	-2640
-0.0917521	-0.106196	-2640
0.185386	0.349566	-2580
0.320439	0.295228	-2580
0.308689	0.0653283	-2580
0.323317	0.0552375	-2580
0.373916	0.00786576	-2580
0.223587	0.0546918	-2580
0.258586	0.0167023	-2580
0.156251	0.0343471	-2580
0.233862	0.000623592	-2580
0.368081	-0.0556424	-2580
0.346976	-0.0588345	-2580
0.270344	-0.0293428	-2580
0.156913	-0.0124891	-2580
0.145652	-0.0280027	-2580
0.201072	-0.0903922	-2580
0.327901	-0.157249	-2580
0.301982	-0.212044	-2580
-0.0839762	-0.0305279	-2580
-0.176796	-0.142114	-2580
-0.135037	-0.206863	-2580
-0.172361	-0.211534	-2580
-0.206613	-0.205238	-2580
-0.359492	-0.150827	-2580
-0.171483	-0.264115	-2580
0.237908	0.28792	-2520
0.0848702	0.292167	-2520
0.0341134	0.28254	-2520
0.241227	0.146774	-2520
0.255027	0.123236	-2520
0.335745	0.0559233	-2520
0.188896	0.0951828	-2520
0.243019	0.0857891	-2520
0.322857	0.0473861	-2520
0.277992	0.0573603	-2520
0.234172	0.0645666	-2520
0.288241	0.0343468	-2520
0.194312	0.0611829	-2520
0.275499	0.0274944	-2520
0.318466	0.0138463	-2520
0.221072	0.0373199	-2520
0.308528	0.000559233	-2520
0.255206	0.0140587	-2520
0.037737	0.0647365	-2520
0.134258	0.00356068	-2520
0.0176485	0.0168761	-2520
0.33876	-0.00723036	-2520
0.361645	-0.0583158	-2520
0.272431	-0.0327867	-2520
0.297737	-0.0681382	-2520
0.281873	-0.063991	-2520
0.230654	-0.0465563	-2520
-0.0117622	-0.123194	-2520
-0.15574	-0.174949	-2520
-0.0923007	-0.206588	-2520
-0.111603	-0.21245	-2520
-0.162653	-0.215835	-2520
-0.205153	-0.200687	-2520
-0.232044	-0.221649	-2520
0.11223	0.385272	-2460
0.0301128	0.38266	-2460
0.35438	0.245997	-2460
0.104771	0.268444	-2460
0.272409	0.130984	-2460
0.241553	0.1315	-2460
0.324287	0.095096	-2460
0.305255	0.0853815	-2460
0.297452	0.0689707	-2460
0.324831	0.0447567	-2460
0.309834	0.0315497	-2460
0.31568	0.0236915	-2460
0.299204	0.0290953	-2460
0.277565	0.027789	-2460
0.255196	0.0243859	-2460
0.0497744	0.00547256	-2460
0.316058	-0.0294876	-2460
0.290664	-0.0417139	-2460
0.200133	-0.00983545	-2460
0.207266	-0.155398	-2460
-0.0712517	-0.0196104	-2460
-0.0257671	-0.0686964	-2460
-0.22828	-0.0637718	-2460
-0.0932756	-0.149047	-2460
-0.159259	-0.129886	-2460
-0.123271	-0.159802	-2460
-0.0750263	-0.181859	-2460
-0.269259	-0.117373	-2460
-0.112413	-0.206651	-2460
-0.156461	-0.197259	-2460
-0.221197	-0.237642	-2460
0.0354003	0.38015	-2400
0.188103	0.166623	-2400
0.363151	0.0378963	-2400
0.302561	0.0485239	-2400
0.232151	0.0816093	-2400
0.260205	0.0336982	-2400
0.183176	0.0619124	-2400
0.0901933	0.1044	-2400
0.0304185	0.0437585	-2400
0.0635711	0.0283201	-2400
0.243677	-0.0365495	-2400
-0.0791589	0.13623	-2400
-0.0680655	-0.0160813	-2400
-0.169808	-0.163729	-2400
-0.14251	-0.2125	-2400
-0.313843	-0.121958	-2400
-0.190042	-0.230039	-2400
-0.288383	-0.185703	-2400
0.280724	0.302479	-2340
0.0471998	0.370674	-2340
0.307372	0.240004	-2340
0.0775462	0.279673	-2340
0.284664	0.184171	-2340
0.195962	0.218423	-2340
0.217062	0.173104	-2340
0.0835439	0.221776	-2340
0.20773	0.143102	-2340
0.219406	0.125987	-2340
0.331349	0.0384723	-2340
0.0563558	0.151985	-2340
0.299459	0.0172971	-2340
0.2649	-0.072613	-2340
0.181766	-0.0320514	-2340
0.305561	-0.127454	-2340
0.0630893	-0.0436649	-2340
0.161025	-0.20475	-2340
-0.0793104	-0.0335496	-2340
-0.0623296	-0.061382	-2340
-0.132162	-0.0737987	-2340
-0.151846	-0.121054	-2340
-0.151535	-0.149974	-2340
-0.179327	-0.159207	-2340
-0.158362	-0.213408	-2340
-0.206584	-0.201447	-2340
0.150226	0.0187594	-2280
0.0338226	0.0981453	-2280
0.144536	0.097589	-2280
0.304851	0.027545	-2280
0.326294	0.0205454	-2280
0.190424	0.147342	-2280
0.345589	0.0689724	-2280
0.330357	0.204561	-2280
0.147072	-0.115376	-2280
0.307288	-0.172373	-2280
0.193216	-0.0940727	-2280
0.23043	-0.0755065	-2280
-0.0577414	0.0208573	-2280
-0.175094	-0.307248	-2280
0.0468208	0.0329248	-2220
0.114106	0.0233952	-2220
0.0655117	0.0862655	-2220
0.0912432	0.0823619	-2220
0.19914	0.0433921	-2220
0.179682	0.0736169	-2220
0.314948	0.00392358	-2220
0.269448	0.0347469	-2220
0.0442354	0.150758	-2220
0.326031	0.0352723	-2220
0.308694	0.0408451	-2220
0.228901	0.105431	-2220
0.19375	0.142419	-2220
0.359699	0.0599177	-2220
0.35975	0.0811648	-2220
0.316966	0.166446	-2220
0.0340357	-0.00288681	-2220
0.146246	-0.00511927	-2220
0.274439	-0.0102385	-2220
0.30126	-0.00900684	-2220
-0.0133484	0.0485971	-2220
-0.228604	-0.263757	-2220
-0.243323	-0.125863	-2220
-0.029263	-0.0910066	-2220
0.063017	0.0163758	-2160
0.305664	0.190424	-2160
0.128347	0.336428	-2160
0.362938	0.251343	-2160
0.309725	0.281789	-2160
0.197227	-0.100853	-2160
0.182414	-0.0060457	-2160
0.37937	-0.0693342	-2160
0.40618	-0.0595824	-2160
-0.0356556	0.00239205	-2160
-0.109866	0.231045	-2160
-0.185544	-0.216063	-2160
-0.208199	-0.176142	-2160
-0.234766	-0.151951	-2160
-0.157048	-0.217903	-2160
-0.145503	-0.193955	-2160
-0.286209	-0.0731887	-2160
-0.267168	-0.0863746	-2160
-0.158105	-0.173652	-2160
-0.212963	-0.123465	-2160
-0.170478	-0.114465	-2160
-0.0726922	-0.154044	-2160
-0.0159368	-0.136662	-2160
0.136571	0.0498471	-2100
0.190561	0.0255717	-2100
0.0478597	0.0906541	-2100
0.267425	0.0346185	-2100
0.287301	0.0296264	-2100
0.303287	0.0274395	-2100
0.317275	0.0336214	-2100
0.052727	0.158249	-2100
0.238792	0.0757179	-2100
0.341034	0.0672162	-2100
0.358555	0.0651954	-2100
0.279743	0.108987	-2100
0.114197	0.266312	-2100
0.300518	0.18525	-2100
0.144899	0.279095	-2100
0.301474	0.214391	-2100
0.250068	0.354374	-2100
0.101129	-0.0441901	-2100
0.315134	-0.103464	-2100
0.206255	-0.00583625	-2100
0.347857	-0.0861152	-2100
0.348378	-0.0187681	-2100
-0.194327	0.183166	-2100
-0.174151	-0.251529	-2100
-0.175268	-0.177791	-2100
-0.151236	-0.15072	-2100
-0.132151	-0.11332	-2100
-0.0817711	-0.022108	-2100
0.0571812	0.0163731	-2040
0.183486	0.032261	-2040
0.253271	0.0277008	-2040
0.241608	0.0636003	-2040
0.305957	0.0405749	-2040
0.333039	0.0380461	-2040
0.0657698	0.15398	-2040
0.0833425	0.146933	-2040
0.114641	0.139917	-2040
0.321363	0.055814	-2040
0.303706	0.068967	-2040
0.277168	0.109797	-2040
0.141951	0.196689	-2040
0.275767	0.14344	-2040
0.350781	0.1262	-2040
0.0774655	0.260344	-2040
0.137832	0.244426	-2040
0.125909	0.256214	-2040
0.258071	0.20268	-2040
0.176727	0.251066	-2040
0.149125	0.282866	-2040
0.178751	0.292944	-2040
0.389877	0.220575	-2040
0.200079	0.314496	-2040
0.320799	-0.0962535	-2040
0.287268	-0.0337644	-2040
0.248386	-0.00521339	-2040
-0.0222149	0.0768312	-2040
-0.0385665	0.0940986	-2040
-0.244282	-0.260227	-2040
-0.222355	-0.154876	-2040
-0.188765	-0.175084	-2040
-0.147851	-0.199958	-2040
-0.159349	-0.157136	-2040
-0.188853	-0.109766	-2040
-0.318445	-8.65659e-05	-2040
-0.123758	-0.123703	-2040
0.233104	0.0181189	-1980
0.285619	0.0302271	-1980
0.108459	0.123791	-1980
0.0377317	0.161343	-1980
0.156259	0.100427	-1980
0.12954	0.121378	-1980
0.0859621	0.143116	-1980
0.256886	0.0558738	-1980
0.262656	0.06856	-1980
0.303409	0.0535259	-1980
0.0667143	0.210441	-1980
0.0771923	0.240892	-1980
0.110445	0.262226	-1980
0.241458	0.217846	-1980
0.264899	0.217983	-1980
0.229883	0.26211	-1980
0.320691	0.222014	-1980
0.322885	0.281862	-1980
0.149156	0.374103	-1980
0.195081	0.3529	-1980
0.0504107	-0.127785	-1980
0.021803	-0.0737765	-1980
0.0567641	-0.0374834	-1980
0.327927	-0.169632	-1980
0.320622	-0.155448	-1980
0.242527	-0.0840227	-1980
0.306915	-0.111339	-1980
0.175146	-0.00981968	-1980
0.323392	-0.0899145	-1980
0.371651	-0.0880299	-1980
0.300499	-0.0108016	-1980
-0.105078	0.287237	-1980
-0.0443506	0.276482	-1980
-0.110938	0.368921	-1980
-0.232927	-0.266636	-1980
-0.197201	-0.270872	-1980
-0.133936	-0.290299	-1980
-0.18896	-0.224858	-1980
-0.170443	-0.223701	-1980
-0.0960183	-0.248921	-1980
-0.121956	-0.198103	-1980
-0.133319	-0.053654	-1980
0.0252857	0.00609822	-1920
0.0210122	0.0132331	-1920
0.0753882	0.0172918	-1920
0.112623	0.0298135	-1920
0.127333	0.0438462	-1920
0.193692	0.0278282	-1920
0.154326	0.0470783	-1920
0.115906	0.0716609	-1920
0.239065	0.034787	-1920
0.138432	0.0742628	-1920
0.316289	0.00226312	-1920
0.207135	0.0539896	-1920
0.0815974	0.110283	-1920
0.051623	0.125257	-1920
0.257894	0.0548095	-1920
0.0663255	0.142692	-1920
0.114117	0.12437	-1920
0.24782	0.0717693	-1920
0.286522	0.0821431	-1920
0.274264	0.0989335	-1920
0.371207	0.0648377	-1920
0.13517	0.168853	-1920
0.280346	0.136959	-1920
0.243841	0.153214	-1920
0.0816041	0.225756	-1920
0.319457	0.136465	-1920
0.105704	0.235418	-1920
0.0963535	0.263619	-1920
0.225662	0.22785	-1920
0.170228	0.346033	-1920
0.182057	0.352254	-1920
0.160234	0.361557	-1920
0.26701	-0.33532	-1920
0.256239	-0.0877466	-1920
0.182532	-0.0280349	-1920
0.130179	-0.00197455	-1920
0.272677	-0.0415215	-1920
0.22102	-0.0116238	-1920
-0.309187	0.227236	-1920
-0.146073	0.238242	-1920
-0.176729	-0.300558	-1920
-0.180424	-0.269017	-1920
-0.158127	-0.289458	-1920
-0.246205	-0.215391	-1920
-0.178905	-0.233425	-1920
-0.120776	-0.240106	-1920
-0.112679	-0.176279	-1920
-0.136391	-0.162994	-1920
-0.176637	-0.0200153	-1920
-0.0444108	-0.0736407	-1920
-0.0268758	-0.0398372	-1920
0.048913	0.00354482	-1860
0.145474	0.0134523	-1860
0.0862403	0.0499529	-1860
0.109552	0.0388546	-1860
0.148444	0.0358082	-1860
0.136758	0.0378991	-1860
0.24627	0.00586419	-1860
0.291054	0.00863358	-1860
0.224949	0.0575895	-1860
0.299877	0.0267039	-1860
0.332849	0.0255061	-1860
0.0796817	0.166177	-1860
0.146466	0.134821	-1860
0.319366	0.0611897	-1860
0.17587	0.168365	-1860
0.226834	0.148052	-1860
0.0607184	0.270113	-1860
0.0839831	0.259804	-1860
0.0631288	0.288619	-1860
0.182575	0.225159	-1860
0.345234	0.226432	-1860
0.225722	0.290447	-1860
0.436135	0.200442	-1860
0.20556	0.331268	-1860
0.224763	0.37501	-1860
0.105523	-0.279383	-1860
0.178813	-0.158788	-1860
0.0189167	-0.0282159	-1860
0.205886	-0.142057	-1860
0.194274	-0.128485	-1860
0.105869	-0.0587698	-1860
0.214862	-0.121154	-1860
0.230403	-0.127637	-1860
0.341486	-0.169127	-1860
0.244365	-0.0895008	-1860
0.278257	-0.0944472	-1860
0.200526	-0.0325195	-1860
0.253294	-0.0135164	-1860
0.341605	-0.0313923	-1860
-0.121874	0.0245044	-1860
-0.00915654	0.0870179	-1860
-0.00789299	0.157923	-1860
-0.257803	-0.293238	-1860
-0.233005	-0.268079	-1860
-0.27606	-0.232083	-1860
-0.190417	-0.25455	-1860
-0.148915	-0.255573	-1860
-0.232704	-0.139187	-1860
-0.130624	-0.181546	-1860
-0.088131	-0.208582	-1860
-0.0389362	-0.0518301	-1860
0.0606807	0.0185687	-1800
0.121471	0.0408467	-1800
0.153714	0.0487954	-1800
0.261846	0.0072155	-1800
0.054651	0.115223	-1800
0.301364	0.0104313	-1800
0.296758	0.0179444	-1800
0.191473	0.067923	-1800
0.0772232	0.125415	-1800
0.287956	0.0384439	-1800
0.138698	0.0984981	-1800
0.229295	0.0777372	-1800
0.118815	0.135577	-1800
0.317386	0.0430607	-1800
0.0984128	0.149899	-1800
0.0665462	0.172867	-1800
0.319433	0.0629142	-1800
0.281694	0.0835517	-1800
0.320637	0.0780131	-1800
0.226003	0.117894	-1800
0.161557	0.151787	-1800
0.0918903	0.199501	-1800
0.20317	0.155329	-1800
0.335503	0.10461	-1800
0.11297	0.210963	-1800
0.315867	0.136739	-1800
0.187928	0.20382	-1800
0.185594	0.258364	-1800
0.167081	0.351723	-1800
0.228405	0.345792	-1800
0.200946	0.364963	-1800
0.111848	-0.215532	-1800
0.225352	-0.236034	-1800
0.26201	-0.238713	-1800
0.372619	-0.00253601	-1800
-0.0415752	0.351662	-1800
-0.164429	-0.248409	-1800
-0.125111	-0.237107	-1800
-0.0640859	-0.203282	-1800
-0.0964166	-0.145235	-1800
0.0586518	0.00167562	-1740
0.0734749	0.0116282	-1740
0.0379238	0.0385394	-1740
0.0530839	0.0495479	-1740
0.0842872	0.0618969	-1740
0.18428	0.00667088	-1740
0.17632	0.0153272	-1740
0.086397	0.0759659	-1740
0.0354971	0.11068	-1740
0.107846	0.0780715	-1740
0.22149	0.0205122	-1740
0.0717829	0.103813	-1740
0.255693	0.0183939	-1740
0.0939265	0.114436	-1740
0.307705	0.0116345	-1740
0.246518	0.0418084	-1740
0.198551	0.0732785	-1740
0.161483	0.0950111	-1740
0.275099	0.0366045	-1740
0.211062	0.0831489	-1740
0.29425	0.0450269	-1740
0.113731	0.153146	-1740
0.246673	0.0894151	-1740
0.100142	0.19171	-1740
0.284125	0.110813	-1740
0.346053	0.0859627	-1740
0.22368	0.158331	-1740
0.290394	0.131527	-1740
0.180175	0.196674	-1740
0.248595	0.165672	-1740
0.121341	0.242694	-1740
0.105891	0.248018	-1740
0.289565	0.18595	-1740
0.307031	0.220051	-1740
0.327071	0.214701	-1740
0.206525	0.292779	-1740
0.260317	0.269769	-1740
0.198079	-0.290024	-1740
0.269275	-0.331352	-1740
0.215248	-0.245819	-1740
0.250583	-0.266991	-1740
0.176117	-0.191939	-1740
0.352612	-0.320335	-1740
0.302427	-0.244884	-1740
0.387078	-0.285867	-1740
0.272929	-0.185587	-1740
0.295086	-0.184216	-1740
0.329437	-0.198319	-1740
0.111898	-0.00991914	-1740
0.21243	-0.0528537	-1740
0.353509	-0.148297	-1740
0.16761	-0.0122152	-1740
0.291911	-0.0980116	-1740
0.345966	-0.102359	-1740
0.261867	-0.038043	-1740
0.306067	-0.0492236	-1740
0.350927	-0.0840087	-1740
0.302386	-0.0170885	-1740
0.335133	-0.0293127	-1740
0.359211	-0.0239493	-1740
-0.123941	0.0566691	-1740
-0.026634	0.0907806	-1740
-0.0922726	0.265383	-1740
-0.0805035	0.352048	-1740
-0.175083	-0.258912	-1740
-0.250342	-0.171227	-1740
-0.202932	-0.194305	-1740
-0.232095	-0.143078	-1740
-0.252649	-0.124973	-1740
-0.145202	-0.218506	-1740
-0.190544	-0.14721	-1740
-0.133912	-0.17974	-1740
-0.153548	-0.16621	-1740
-0.116459	-0.106642	-1740
-0.12935	-0.0681347	-1740
-0.116261	-0.0663761	-1740
0.0539294	0.0600461	-1680
0.120552	0.0286447	-1680
0.00798906	0.0853099	-1680
0.17101	0.0185317	-1680
0.219467	0.0102467	-1680
0.221435	0.0272775	-1680
0.095275	0.0943305	-1680
0.247906	0.0337792	-1680
0.0868342	0.114438	-1680
0.235935	0.0461064	-1680
0.262387	0.0348417	-1680
0.176559	0.0903477	-1680
0.141073	0.11501	-1680
0.341051	0.0146679	-1680
0.0466179	0.171125	-1680
0.270195	0.0621786	-1680
0.321911	0.0450884	-1680
0.219209	0.105892	-1680
0.0479343	0.191581	-1680
0.0610795	0.20697	-1680
0.309211	0.089092	-1680
0.270337	0.121719	-1680
0.206547	0.167127	-1680
0.256172	0.146968	-1680
0.295531	0.134307	-1680
0.0747667	0.254421	-1680
0.0980047	0.264081	-1680
0.217686	0.210693	-1680
0.256282	0.187925	-1680
0.143396	0.258515	-1680
0.253243	0.209764	-1680
0.128115	0.275175	-1680
0.185704	0.2537	-1680
0.274519	0.206457	-1680
0.326803	0.182338	-1680
0.316226	0.21582	-1680
0.298641	0.231595	-1680
0.315942	0.236239	-1680
0.158658	0.330829	-1680
0.153799	0.354637	-1680
0.175701	0.365032	-1680
0.00457532	-0.0720242	-1680
0.283715	-0.174035	-1680
0.210084	-0.0954285	-1680
0.277294	-0.115865	-1680
0.237871	-0.0760326	-1680
0.16304	-0.0269374	-1680
0.264994	-0.0723291	-1680
0.200172	-0.0138363	-1680
0.23631	-0.00646532	-1680
0.326422	-0.0169569	-1680
0.379861	-0.0427106	-1680
0.346653	-0.0180868	-1680
-0.273893	0.0236545	-1680
-0.205399	0.261488	-1680
-0.183249	-0.278173	-1680
-0.163165	-0.275603	-1680
-0.177144	-0.182832	-1680
-0.121489	-0.0770406	-1680
-0.0159329	-0.0952762	-1680
0.0648252	0.0270667	-1620
0.101997	0.0447571	-1620
0.141558	0.0385741	-1620
0.103389	0.0682743	-1620
0.186261	0.061786	-1620
0.168816	0.0701445	-1620
0.180442	0.0722055	-1620
0.127769	0.111212	-1620
0.214146	0.0778161	-1620
0.289117	0.0481413	-1620
0.243712	0.0702527	-1620
0.335545	0.0454569	-1620
0.113297	0.145594	-1620
0.126992	0.14151	-1620
0.271372	0.106098	-1620
0.312168	0.0885664	-1620
0.166252	0.155467	-1620
0.362515	0.0713023	-1620
0.29752	0.0981972	-1620
0.178072	0.164735	-1620
0.150676	0.18899	-1620
0.15652	0.179124	-1620
0.129563	0.194505	-1620
0.27862	0.146758	-1620
0.285343	0.141599	-1620
0.213099	0.225713	-1620
0.222549	0.254567	-1620
0.269459	0.232539	-1620
0.317918	0.237214	-1620
0.334435	0.239364	-1620
0.188744	0.302887	-1620
0.371331	0.230847	-1620
0.138216	0.341124	-1620
0.147446	0.35057	-1620
0.36496	0.261959	-1620
0.23973	0.328459	-1620
0.295162	0.34022	-1620
0.341577	0.375595	-1620
0.328597	-0.34732	-1620
0.246641	-0.269379	-1620
0.277335	-0.291993	-1620
0.0408528	-0.0269793	-1620
0.0931369	-0.0134312	-1620
0.231008	-0.0696314	-1620
0.218555	-0.055264	-1620
0.291544	-0.0740424	-1620
0.302486	-0.07226	-1620
0.308983	-0.00132331	-1620
-0.119619	0.0820205	-1620
-0.312665	0.273505	-1620
-0.210746	-0.285351	-1620
-0.103459	-0.21834	-1620
-0.109586	-0.144484	-1620
-0.12363	-0.113896	-1620
-0.214602	-0.0278077	-1620
-0.0854392	-0.103054	-1620
0.107187	0.0199526	-1560
0.0646285	0.0869391	-1560
0.0704562	0.118245	-1560
0.0877156	0.112874	-1560
0.12171	0.147159	-1560
0.0877696	0.175545	-1560
0.379107	0.000844875	-1560
0.222754	0.121398	-1560
0.346376	0.049908	-1560
0.0657694	0.251577	-1560
0.165934	0.201774	-1560
0.145306	0.221772	-1560
0.235427	0.182787	-1560
0.203305	0.222564	-1560
0.345312	0.172634	-1560
0.170043	0.337693	-1560
0.00512619	-0.0861517	-1560
0.389251	-0.181077	-1560
0.171477	-0.0186714	-1560
0.357014	-0.146234	-1560
0.326843	-0.104815	-1560
0.337026	-0.0896997	-1560
0.306615	-0.0616675	-1560
0.310516	-0.0290891	-1560
-0.222239	-0.29434	-1560
-0.13197	-0.218931	-1560
-0.147267	-0.184875	-1560
-0.174727	-0.15818	-1560
-0.0138652	-0.0925246	-1560
-0.00919242	-0.0767088	-1560
0.335203	0.263105	-1500
0.312688	0.190058	-1500
0.244639	0.211585	-1500
0.306277	0.0841526	-1500
0.252286	0.100065	-1500
0.219248	0.0917478	-1500
0.151798	0.106635	-1500
0.29652	0.0115015	-1500
0.257475	0.0231738	-1500
0.267919	0.00191044	-1500
0.137328	0.0278179	-1500
0.362762	-0.0924166	-1500
0.134683	-0.011337	-1500
0.264689	-0.0878667	-1500
0.319396	-0.113568	-1500
0.228745	-0.0980663	-1500
0.222861	-0.228029	-1500
-0.137185	-0.0733702	-1500
-0.119976	-0.216949	-1500
0.155448	0.00150807	-1440
0.175514	0.017503	-1440
0.161234	0.0259442	-1440
0.0805215	0.0839917	-1440
0.183524	0.0469705	-1440
0.0941858	0.0917923	-1440
0.237303	0.0373482	-1440
0.290149	0.0198252	-1440
0.160744	0.0770119	-1440
0.110922	0.101895	-1440
0.334244	0.0148739	-1440
0.108801	0.112412	-1440
0.106075	0.120573	-1440
0.159333	0.120699	-1440
0.317627	0.061771	-1440
0.301075	0.0763446	-1440
0.201384	0.11821	-1440
0.116715	0.164941	-1440
0.219651	0.120479	-1440
0.25123	0.11398	-1440
0.165956	0.150394	-1440
0.117796	0.182824	-1440
0.34691	0.10004	-1440
0.0995176	0.213319	-1440
0.311888	0.1211	-1440
0.24426	0.161644	-1440
0.215019	0.187695	-1440
0.293072	0.169498	-1440
0.184116	0.237915	-1440
0.230351	0.227225	-1440
0.10268	0.282384	-1440
0.344113	0.224449	-1440
0.309725	0.244702	-1440
0.346378	0.242593	-1440
0.235641	-0.332411	-1440
0.245886	-0.297761	-1440
0.182699	-0.220716	-1440
0.273292	-0.217307	-1440
0.133565	-0.0201343	-1440
0.222777	-0.0679347	-1440
0.353886	-0.0955543	-1440
0.333455	-0.0656686	-1440
0.323795	-0.0385598	-1440
0.392063	-0.0511251	-1440
0.341028	-0.0155001	-1440
-0.0228001	0.136288	-1440
-0.146865	-0.243744	-1440
-0.165103	-0.148385	-1440
-0.145782	-0.141653	-1440
-0.107275	-0.156216	-1440
-0.146492	-0.124502	-1440
-0.0821023	-0.108807	-1440
-0.00374804	-0.12456	-1440
-0.103313	-0.0466018	-1440
-0.0454595	-0.0155201	-1440
0.0733969	0.0214119	-1380
0.0612594	0.0842385	-1380
0.206416	0.0446977	-1380
0.229836	0.0255138	-1380
0.188558	0.0513191	-1380
0.113452	0.0874867	-1380
0.127733	0.0899437	-1380
0.279698	0.0265896	-1380
0.154344	0.0873618	-1380
0.104602	0.110384	-1380
0.304172	0.0196906	-1380
0.172791	0.0810944	-1380
0.0759315	0.141297	-1380
0.138756	0.122273	-1380
0.225103	0.0919981	-1380
0.317808	0.0618827	-1380
0.298843	0.0742232	-1380
0.218541	0.122495	-1380
0.268265	0.102145	-1380
0.337959	0.092248	-1380
0.283268	0.124557	-1380
0.316502	0.115485	-1380
0.219835	0.165395	-1380
0.212189	0.171274	-1380
0.24821	0.156727	-1380
0.152495	0.203909	-1380
0.297236	0.138493	-1380
0.100803	0.252834	-1380
0.344401	0.142901	-1380
0.255989	0.18501	-1380
0.113109	0.257262	-1380
0.250769	0.198141	-1380
0.192267	0.223558	-1380
0.214483	0.21845	-1380
0.192767	0.236585	-1380
0.267904	0.209913	-1380
0.121917	0.285094	-1380
0.18662	0.257512	-1380
0.215651	0.249328	-1380
0.123663	0.296442	-1380
0.308434	0.215264	-1380
0.338585	0.259726	-1380
0.210016	0.336322	-1380
0.34947	0.322101	-1380
0.238758	-0.153304	-1380
0.0326616	-0.00300043	-1380
0.277446	-0.0123239	-1380
0.340903	-0.0369617	-1380
0.363119	-0.00586997	-1380
-0.0221188	0.0142664	-1380
-0.066544	0.0636305	-1380
-0.0231887	0.116338	-1380
-0.276776	-0.219664	-1380
-0.152416	-0.196892	-1380
-0.134909	-0.204496	-1380
-0.211883	-0.14689	-1380
-0.155151	-0.17353	-1380
-0.317885	-0.0612365	-1380
-0.0403582	-0.135988	-1380
0.234639	0.346672	-1320
0.196784	0.33976	-1320
0.210322	0.332662	-1320
0.199345	0.312316	-1320
0.272802	0.24787	-1320
0.289364	0.240894	-1320
0.390244	0.194227	-1320
0.143379	0.278173	-1320
0.144653	0.263274	-1320
0.2618	0.206331	-1320
0.224636	0.21468	-1320
0.285476	0.184391	-1320
0.25049	0.201509	-1320
0.228779	0.200762	-1320
0.207844	0.20557	-1320
0.323396	0.145227	-1320
0.288839	0.16002	-1320
0.219781	0.186105	-1320
0.226954	0.175118	-1320
0.212423	0.175516	-1320
0.303786	0.137326	-1320
0.106855	0.212902	-1320
0.129827	0.18565	-1320
0.211302	0.151443	-1320
0.255005	0.126253	-1320
0.171455	0.156592	-1320
0.243048	0.102628	-1320
0.372369	0.0466668	-1320
0.202567	0.114818	-1320
0.222561	0.101199	-1320
0.33819	0.0483451	-1320
0.35821	0.0122321	-1320
0.142764	0.0873526	-1320
0.295301	0.0245779	-1320
0.214453	0.0470863	-1320
0.302422	3.55583e-05	-1320
0.160773	0.042222	-1320
0.211392	0.0112791	-1320
0.166005	0.00696943	-1320
0.0998617	0.0253958	-1320
0.0867457	0.0307864	-1320
0.285086	-0.00154426	-1320
0.324587	-0.0269853	-1320
0.371671	-0.0812874	-1320
0.271957	-0.0390602	-1320
0.156072	-0.00430124	-1320
0.3303	-0.0998447	-1320
0.270215	-0.0936415	-1320
0.316287	-0.142168	-1320
0.192999	-0.0761137	-1320
0.409642	-0.184317	-1320
0.156648	-0.0849169	-1320
0.153958	-0.117285	-1320
0.0773507	-0.130337	-1320
0.276831	-0.278237	-1320
0.240595	-0.297117	-1320
-0.116169	0.202932	-1320
-0.204598	0.237312	-1320
-0.0538754	0.0284274	-1320
-0.03995	0.0217734	-1320
-0.0587764	-0.100091	-1320
-0.120887	-0.185549	-1320
-0.0830869	-0.217377	-1320
-0.152796	-0.212666	-1320
-0.165108	-0.214855	-1320
-0.173637	-0.233208	-1320
-0.178968	-0.25946	-1320
-0.16711	-0.287655	-1320
0.277773	0.342046	-1260
0.175916	0.358899	-1260
0.241838	0.30818	-1260
0.157477	0.33557	-1260
0.170423	0.316764	-1260
0.137188	0.31538	-1260
0.105106	0.320613	-1260
0.344373	0.197155	-1260
0.111727	0.308363	-1260
0.12328	0.286549	-1260
0.218898	0.240666	-1260
0.255746	0.213634	-1260
0.189707	0.238434	-1260
0.273501	0.169099	-1260
0.212536	0.19646	-1260
0.128933	0.200953	-1260
0.177396	0.166311	-1260
0.156515	0.174287	-1260
0.343041	0.0865251	-1260
0.394956	0.060108	-1260
0.260363	0.113374	-1260
0.309115	0.0871251	-1260
0.173925	0.144072	-1260
0.250697	0.100268	-1260
0.139771	0.152934	-1260
0.234045	0.101124	-1260
0.340797	0.0441846	-1260
0.292809	0.0616301	-1260
0.306082	0.0477117	-1260
0.118971	0.130439	-1260
0.351697	0.00901547	-1260
0.168981	0.0979701	-1260
0.249211	0.059464	-1260
0.243632	0.0491167	-1260
0.332518	0.000629327	-1260
0.312808	0.000387841	-1260
0.150319	0.0565223	-1260
0.237997	0.0073397	-1260
0.132256	0.0539684	-1260
0.222369	0.00166845	-1260
0.171533	0.0104644	-1260
0.142391	0.0260512	-1260
0.111986	0.040716	-1260
0.0692876	0.0187261	-1260
0.107584	0.000234168	-1260
0.346795	-0.0120937	-1260
0.251948	-0.00578762	-1260
0.21277	-0.00397739	-1260
0.285146	-0.0861939	-1260
0.163303	-0.0259465	-1260
0.137644	-0.0260825	-1260
0.103793	-0.0503123	-1260
0.102227	-0.0845961	-1260
0.278648	-0.197969	-1260
0.253126	-0.224289	-1260
0.34272	-0.345591	-1260
0.241844	-0.304288	-1260
-0.31625	0.237121	-1260
-0.098945	-0.144098	-1260
-0.235132	-0.122638	-1260
-0.149718	-0.197314	-1260
-0.11855	-0.257234	-1260
-0.19132	-0.278771	-1260
0.169633	0.360496	-1200
0.153101	0.329056	-1200
0.240961	0.271209	-1200
0.317155	0.23717	-1200
0.146845	0.269232	-1200
0.244967	0.218816	-1200
0.206574	0.191676	-1200
0.0822144	0.243777	-1200
0.0756673	0.225086	-1200
0.333523	0.108816	-1200
0.312556	0.109326	-1200
0.245584	0.133028	-1200
0.0527523	0.208194	-1200
0.331774	0.0668659	-1200
0.266956	0.0961338	-1200
0.183713	0.122435	-1200
0.213968	0.102441	-1200
0.304648	0.0573747	-1200
0.236284	0.0877063	-1200
0.349969	0.0324966	-1200
0.331363	0.0375156	-1200
0.24156	0.078627	-1200
0.293012	0.0523181	-1200
0.335919	0.0110944	-1200
0.154705	0.0898862	-1200
0.134235	0.0942311	-1200
0.126895	0.0814437	-1200
0.179774	0.0489022	-1200
0.0695376	0.0665438	-1200
0.122211	0.0413511	-1200
0.184143	0.00679447	-1200
0.133321	0.0259418	-1200
0.36068	-0.0680587	-1200
0.295317	-0.0331101	-1200
0.207984	-0.0164199	-1200
0.398002	-0.126655	-1200
0.236411	-0.0431135	-1200
0.154572	-0.023251	-1200
0.155219	-0.0376161	-1200
0.287088	-0.112948	-1200
0.299577	-0.124177	-1200
0.30705	-0.149437	-1200
0.389924	-0.19794	-1200
0.0521774	-0.0219983	-1200
0.242946	-0.125664	-1200
0.260663	-0.194497	-1200
0.0137962	-0.0833791	-1200
0.0113092	-0.103782	-1200
-0.0192967	-0.01035	-1200
-0.00687541	-0.110372	-1200
-0.0948093	-0.151172	-1200
-0.177733	-0.251457	-1200
-0.174741	-0.276366	-1200
-0.226359	-0.268384	-1200
0.186442	0.369195	-1140
0.292163	0.266117	-1140
0.264512	0.258553	-1140
0.315291	0.228977	-1140
0.0905242	0.319087	-1140
0.174688	0.276198	-1140
0.189517	0.269909	-1140
0.127569	0.288411	-1140
0.136907	0.276664	-1140
0.132558	0.270328	-1140
0.354522	0.173599	-1140
0.274484	0.203343	-1140
0.279962	0.189051	-1140
0.0942087	0.253222	-1140
0.306962	0.163497	-1140
0.213774	0.198066	-1140
0.240049	0.186568	-1140
0.0960751	0.237952	-1140
0.153541	0.205043	-1140
0.181145	0.188801	-1140
0.293112	0.133922	-1140
0.321778	0.119975	-1140
0.282022	0.134219	-1140
0.23416	0.156628	-1140
0.0427463	0.216629	-1140
0.252359	0.131426	-1140
0.190211	0.157559	-1140
0.165712	0.16928	-1140
0.341475	0.0849404	-1140
0.185482	0.147951	-1140
0.275064	0.0970391	-1140
0.0751519	0.165387	-1140
0.171577	0.124887	-1140
0.217755	0.10764	-1140
0.307499	0.056384	-1140
0.27423	0.0678822	-1140
0.222641	0.0771603	-1140
0.316602	0.029744	-1140
0.267091	0.0469777	-1140
0.0535462	0.131533	-1140
0.356014	4.72341e-05	-1140
0.202219	0.0626797	-1140
0.343463	0.00550615	-1140
0.177479	0.070588	-1140
0.0879933	0.103193	-1140
0.066599	0.113692	-1140
0.0500187	0.11185	-1140
0.270244	0.0216872	-1140
0.135626	0.0686177	-1140
0.0533227	0.0966207	-1140
0.112903	0.0705812	-1140
0.266583	0.00571533	-1140
0.0887242	0.0689753	-1140
0.114159	0.0565662	-1140
0.216806	0.00430505	-1140
0.149259	0.0228276	-1140
0.0154689	0.0669982	-1140
0.0689668	0.0338938	-1140
0.0543495	0.0202094	-1140
0.027809	0.0152026	-1140
0.02706	0.00262487	-1140
0.279799	-0.0106296	-1140
0.27028	-0.0624989	-1140
0.194149	-0.0380561	-1140
0.186521	-0.0713627	-1140
0.122132	-0.0443016	-1140
0.169536	-0.0912649	-1140
0.223245	-0.12906	-1140
0.17345	-0.100746	-1140
0.226839	-0.160488	-1140
0.276266	-0.279118	-1140
0.264222	-0.331309	-1140
-0.276307	0.252401	-1140
-0.101008	0.130049	-1140
-0.301402	0.0680114	-1140
-0.0557007	-0.00852585	-1140
-0.0903008	-0.11797	-1140
-0.314632	-0.0375912	-1140
-0.0880088	-0.15795	-1140
-0.102452	-0.178244	-1140
-0.164445	-0.172036	-1140
-0.188658	-0.173823	-1140
-0.198152	-0.209192	-1140
-0.188674	-0.286407	-1140
-0.260032	-0.360925	-1140
0.182595	0.342475	-1080
0.179681	0.316588	-1080
0.354267	0.220165	-1080
0.144344	0.305529	-1080
0.21641	0.272424	-1080
0.390568	0.172346	-1080
0.21912	0.236469	-1080
0.185653	0.22717	-1080
0.320496	0.145646	-1080
0.217243	0.184865	-1080
0.338926	0.128616	-1080
0.343642	0.117108	-1080
0.294162	0.138963	-1080
0.250225	0.153392	-1080
0.105198	0.212007	-1080
0.265952	0.130832	-1080
0.306863	0.111387	-1080
0.163874	0.160589	-1080
0.263342	0.114807	-1080
0.307634	0.091371	-1080
0.243316	0.0954681	-1080
0.167403	0.127975	-1080
0.329816	0.0472282	-1080
0.337639	0.0441143	-1080
0.0507845	0.160688	-1080
0.147793	0.104396	-1080
0.288731	0.03354	-1080
0.0623171	0.101347	-1080
0.24454	0.0032065	-1080
0.048591	0.0781887	-1080
0.0761363	0.0494941	-1080
0.060919	0.0519738	-1080
0.154025	0.0083654	-1080
0.0676174	0.0182414	-1080
0.327064	-0.043977	-1080
0.153925	-0.0150191	-1080
0.310299	-0.10891	-1080
0.181769	-0.0527952	-1080
0.270575	-0.108682	-1080
0.290776	-0.143173	-1080
0.240271	-0.120302	-1080
0.017504	-0.00669272	-1080
0.328443	-0.188406	-1080
0.295865	-0.178437	-1080
0.156672	-0.102674	-1080
0.184012	-0.125291	-1080
0.246826	-0.213342	-1080
0.226787	-0.205744	-1080
0.256184	-0.281981	-1080
-0.126146	0.21911	-1080
-0.06066	0.0113056	-1080
-0.374497	0.0925014	-1080
-0.118935	-0.135914	-1080
-0.0943049	-0.152191	-1080
-0.0859839	-0.160747	-1080
-0.124641	-0.22243	-1080
-0.167345	-0.289091	-1080
0.252498	0.330054	-1020
0.234874	0.321076	-1020
0.1304	0.349344	-1020
0.145666	0.33009	-1020
0.147488	0.300402	-1020
0.34173	0.197995	-1020
0.355436	0.179544	-1020
0.122304	0.265867	-1020
0.128884	0.243552	-1020
0.191184	0.215234	-1020
0.0295146	0.275641	-1020
0.0742586	0.243953	-1020
0.11458	0.207884	-1020
0.169418	0.162198	-1020
0.342784	0.0685751	-1020
0.23513	0.106523	-1020
0.350502	0.0292141	-1020
0.332818	0.0312435	-1020
0.264639	0.0596043	-1020
0.186487	0.0857637	-1020
0.293124	0.0383498	-1020
0.0838593	0.123375	-1020
0.0382624	0.142435	-1020
0.294933	0.0238073	-1020
0.173603	0.0715438	-1020
0.150302	0.0791378	-1020
0.161883	0.0575821	-1020
0.247783	0.0109643	-1020
0.0736251	0.0728489	-1020
0.0751419	0.0325845	-1020
0.0246899	0.0312363	-1020
0.0325422	0.0209031	-1020
0.322413	-0.0325389	-1020
0.305606	-0.031163	-1020
0.374382	-0.0735545	-1020
0.216952	-0.00985261	-1020
0.247545	-0.0303565	-1020
0.204872	-0.02203	-1020
0.196356	-0.0188196	-1020
0.363691	-0.126012	-1020
0.0567204	-0.0136323	-1020
0.434404	-0.208067	-1020
0.176807	-0.1018	-1020
0.256147	-0.195692	-1020
0.257998	-0.25888	-1020
0.270414	-0.321064	-1020
-0.0820431	-0.0425928	-1020
-0.156824	-0.115715	-1020
-0.17055	-0.117077	-1020
-0.078217	-0.179525	-1020
-0.124983	-0.186005	-1020
-0.118731	-0.203768	-1020
-0.0948432	-0.236683	-1020
-0.135898	-0.250425	-1020
-0.142195	-0.240626	-1020
-0.197205	-0.230626	-1020
0.0579985	0.0484147	-960
0.125412	0.0678056	-960
0.14251	0.0823019	-960
0.23397	0.0701826	-960
0.175222	0.117667	-960
0.324681	0.0312209	-960
0.150769	0.161836	-960
0.139043	0.2195	-960
0.115713	0.242355	-960
0.211499	0.181391	-960
0.273578	0.143102	-960
0.247143	0.169811	-960
0.276052	0.151867	-960
0.372354	0.130122	-960
0.35798	0.168388	-960
0.281747	0.257868	-960
0.248092	0.281676	-960
0.273482	0.278963	-960
0.253374	0.304375	-960
0.11612	-0.287004	-960
0.251437	-0.305627	-960
0.253923	-0.275175	-960
0.0124366	-0.0358255	-960
0.198397	-0.157908	-960
0.307053	-0.175386	-960
0.130603	-0.0255415	-960
0.375589	-0.152802	-960
0.326921	-0.100095	-960
0.341779	-0.0150064	-960
-0.0516898	0.0137892	-960
-0.264454	0.202198	-960
-0.191962	0.215957	-960
-0.293664	-0.119442	-960
-0.141923	-0.208193	-960
-0.140611	-0.1806	-960
0.107203	0.0186086	-900
0.0692982	0.0829899	-900
0.0898772	0.101807	-900
0.14474	0.0783605	-900
0.147369	0.100843	-900
0.280889	0.0903864	-900
0.0658579	0.208972	-900
0.321847	0.0887587	-900
0.272067	0.164398	-900
0.208413	0.217046	-900
0.324626	0.172211	-900
0.342139	0.228141	-900
0.324419	0.244184	-900
0.126733	0.34506	-900
0.367345	0.235804	-900
0.173873	-0.260495	-900
0.214762	-0.258225	-900
0.159887	-0.202205	-900
0.278622	-0.0506455	-900
0.380812	-0.11029	-900
-0.425497	0.253799	-900
0.192491	0.383428	-840
0.20712	0.319154	-840
0.220576	0.29168	-840
0.123989	0.320197	-840
0.331287	0.237196	-840
0.12182	0.272281	-840
0.303067	0.17611	-840
0.234375	0.192262	-840
0.0931333	0.243996	-840
0.289476	0.145196	-840
0.364355	0.113378	-840
0.24584	0.139112	-840
0.239457	0.134278	-840
0.105815	0.181616	-840
0.280782	0.108689	-840
0.202628	0.125365	-840
0.258676	0.104758	-840
0.341413	0.0438782	-840
0.314188	0.0602553	-840
0.270589	0.0666972	-840
0.351944	0.0311205	-840
0.193271	0.0773364	-840
0.270583	0.0397872	-840
0.196165	0.0701241	-840
0.197105	0.0529699	-840
0.18921	0.0421714	-840
0.144154	0.0533418	-840
0.130711	0.0570875	-840
0.0682003	0.0650967	-840
0.177056	0.0146106	-840
0.108463	0.0427359	-840
0.133623	0.0188343	-840
0.0784917	0.00827489	-840
0.280106	-0.0172573	-840
0.288032	-0.0377896	-840
0.343668	-0.0878562	-840
0.228563	-0.0548433	-840
0.321235	-0.134741	-840
0.262202	-0.114226	-840
0.254448	-0.114896	-840
0.0559119	-0.0458074	-840
0.223838	-0.140248	-840
0.255413	-0.226882	-840
0.0529136	-0.16772	-840
0.186863	-0.285739	-840
-0.229577	0.13953	-840
-0.125109	0.0833083	-840
-0.0391835	0.00253159	-840
-0.382078	0.0728454	-840
-0.0791497	-0.147143	-840
-0.132644	-0.21452	-840
-0.132632	-0.251059	-840
0.0977182	0.0823524	-780
0.264952	0.000787396	-780
0.0864172	0.0949309	-780
0.0422051	0.118209	-780
0.129054	0.0762319	-780
0.0965572	0.0928929	-780
0.223289	0.0361938	-780
0.220092	0.0663332	-780
0.151388	0.0937994	-780
0.241434	0.0540392	-780
0.322723	0.0184277	-780
0.0826833	0.148679	-780
0.151078	0.132474	-780
0.281445	0.0799505	-780
0.116639	0.168337	-780
0.316212	0.0760069	-780
0.288184	0.0884861	-780
0.104235	0.184734	-780
0.145437	0.176827	-780
0.220495	0.173015	-780
0.0998711	0.238111	-780
0.21644	0.17987	-780
0.196387	0.201124	-780
0.246772	0.176185	-780
0.335838	0.146363	-780
0.071744	0.285474	-780
0.160723	0.249009	-780
0.335978	0.16759	-780
0.305949	0.176886	-780
0.124976	0.275642	-780
0.33424	0.188624	-780
0.398953	0.163871	-780
0.15773	0.292607	-780
0.11469	0.321231	-780
0.366806	0.194791	-780
0.202957	0.298079	-780
0.222817	0.288564	-780
0.155682	0.330098	-780
0.290004	0.273041	-780
0.162922	0.350008	-780
0.243534	0.332811	-780
0.234864	-0.300982	-780
0.210676	-0.286944	-780
0.194147	-0.252914	-780
0.235419	-0.18495	-780
0.143745	-0.0795495	-780
0.160168	-0.0515268	-780
0.288977	-0.120165	-780
0.244182	-0.0892699	-780
0.292641	-0.0978957	-780
0.218762	-0.0232063	-780
0.374729	-0.0886569	-780
0.275494	-0.0169888	-780
-0.0860414	0.0715691	-780
-0.0313463	0.186093	-780
-0.356567	-0.158217	-780
-0.132608	-0.259293	-780
-0.150027	-0.242843	-780
-0.120683	-0.262951	-780
-0.0950639	-0.208786	-780
-0.298576	-0.0775905	-780
-0.0345763	-0.0668345	-780
-0.0477107	-0.0281358	-780
0.264386	0.348044	-720
0.217871	0.342507	-720
0.148237	0.360259	-720
0.168152	0.312195	-720
0.160908	0.302842	-720
0.183463	0.290788	-720
0.380135	0.21273	-720
0.255428	0.248728	-720
0.182669	0.266824	-720
0.201263	0.26685	-720
0.163088	0.268992	-720
0.302065	0.208796	-720
0.375042	0.181145	-720
0.346963	0.186403	-720
0.150333	0.262281	-720
0.293573	0.207213	-720
0.169423	0.251934	-720
0.0610392	0.286894	-720
0.109105	0.267188	-720
0.128559	0.258425	-720
0.238997	0.202059	-720
0.0639464	0.263339	-720
0.258378	0.186195	-720
0.315504	0.159908	-720
0.354509	0.14037	-720
0.175656	0.20411	-720
0.243042	0.174966	-720
0.0956289	0.22218	-720
0.228337	0.166457	-720
0.220172	0.162017	-720
0.22463	0.156208	-720
0.229851	0.15293	-720
0.15215	0.18036	-720
0.277462	0.132244	-720
0.177497	0.162088	-720
0.110964	0.182853	-720
0.273259	0.119658	-720
0.211681	0.13338	-720
0.0601307	0.184982	-720
0.0848965	0.165587	-720
0.20898	0.116121	-720
0.118681	0.151093	-720
0.170211	0.125883	-720
0.0954835	0.150171	-720
0.281854	0.0780585	-720
0.151326	0.121138	-720
0.0843453	0.14568	-720
0.22463	0.0910531	-720
0.252878	0.0741705	-720
0.0646429	0.145115	-720
0.269177	0.0620197	-720
0.212517	0.0754297	-720
0.189259	0.0856073	-720
0.226023	0.0652002	-720
0.0474359	0.125922	-720
0.200355	0.0631556	-720
0.0773196	0.11024	-720
0.185171	0.0564765	-720
0.133665	0.0709121	-720
0.0755752	0.0895602	-720
0.174378	0.048006	-720
0.176516	0.0336419	-720
0.211093	0.0189077	-720
0.222322	0.0144485	-720
0.17829	0.0131374	-720
0.038787	0.058638	-720
0.121473	0.0232825	-720
0.0444076	0.0482462	-720
0.10191	0.0249377	-720
0.364897	-0.0154411	-720
0.314705	-0.00263891	-720
0.322088	-0.0111173	-720
0.281999	-0.000584714	-720
0.348223	-0.0458693	-720
0.382903	-0.07252	-720
0.20534	-0.000707812	-720
0.299085	-0.0458308	-720
0.388397	-0.0947237	-720
0.258772	-0.0489929	-720
0.178842	-0.052055	-720
0.159176	-0.0618643	-720
0.258735	-0.116404	-720
0.292005	-0.154765	-720
0.231983	-0.138747	-720
0.344183	-0.204373	-720
0.196067	-0.202827	-720
0.239899	-0.253058	-720
0.292192	-0.310214	-720
-0.112154	0.239693	-720
-0.0197502	0.0282992	-720
-0.0231117	0.0202894	-720
-0.0626829	0.000489578	-720
-0.356674	0.109866	-720
-0.0402076	-0.0850709	-720
-0.109042	-0.131466	-720
-0.172911	-0.102338	-720
-0.11137	-0.156556	-720
-0.159373	-0.150933	-720
-0.207973	-0.147329	-720
-0.0736649	-0.211479	-720
-0.323341	-0.114031	-720
-0.127933	-0.229724	-720
-0.182267	-0.217591	-720
-0.182038	-0.2542	-720
0.255809	0.341463	-660
0.2819	0.319979	-660
0.33328	0.288451	-660
0.277295	0.289075	-660
0.336475	0.258152	-660
0.183377	0.320773	-660
0.297641	0.253239	-660
0.236842	0.281455	-660
0.336475	0.206293	-660
0.245231	0.241764	-660
0.295495	0.21825	-660
0.337585	0.196902	-660
0.382471	0.147737	-660
0.16202	0.242049	-660
0.300591	0.171902	-660
0.198548	0.221202	-660
0.180379	0.224093	-660
0.30018	0.157224	-660
0.259874	0.176252	-660
0.261278	0.167315	-660
0.185358	0.200688	-660
0.362039	0.114608	-660
0.315792	0.12421	-660
0.249891	0.151951	-660
0.247917	0.142213	-660
0.121039	0.19055	-660
0.316528	0.100378	-660
0.326682	0.0925538	-660
0.241282	0.129951	-660
0.305784	0.0811194	-660
0.318079	0.0633063	-660
0.370158	0.0360945	-660
0.232268	0.0849738	-660
0.136511	0.135848	-660
0.305557	0.0510712	-660
0.152938	0.0922145	-660
0.144752	0.0962725	-660
0.0991667	0.107496	-660
0.235033	0.0437695	-660
0.101221	0.0800404	-660
0.131721	0.0638763	-660
0.138252	0.0369631	-660
0.106372	0.0467553	-660
0.131482	0.018261	-660
0.115061	0.0232623	-660
0.111799	0.00863853	-660
0.0447697	0.00651453	-660
0.359078	-0.0332538	-660
0.339216	-0.0409	-660
0.326909	-0.055737	-660
0.28309	-0.0305062	-660
0.342834	-0.0677244	-660
0.25644	-0.0322489	-660
0.404197	-0.122582	-660
0.1806	-0.0108883	-660
0.24734	-0.053798	-660
0.170672	-0.00984425	-660
0.192759	-0.0410491	-660
0.326185	-0.119379	-660
0.111584	-0.00804654	-660
0.251406	-0.0972414	-660
0.236247	-0.0885983	-660
0.11365	-0.056051	-660
0.0535385	-0.0292501	-660
0.289363	-0.172321	-660
0.373923	-0.281833	-660
0.226608	-0.195009	-660
0.220114	-0.222964	-660
0.238866	-0.304764	-660
0.227969	-0.362102	-660
0.238069	-0.384044	-660
-0.210511	0.201256	-660
-0.0730646	-0.00265341	-660
-0.0541054	-0.0232005	-660
-0.0885303	-0.0885567	-660
-0.134976	-0.10888	-660
-0.0645432	-0.154376	-660
-0.0917709	-0.147231	-660
-0.214694	-0.254743	-660
0.124765	0.393058	-600
0.143	0.370779	-600
0.204021	0.343284	-600
0.14931	0.33866	-600
0.126205	0.344266	-600
0.162475	0.320655	-600
0.223502	0.287304	-600
0.135982	0.307207	-600
0.114812	0.316912	-600
0.320473	0.23617	-600
0.142522	0.288482	-600
0.127651	0.288078	-600
0.378421	0.182963	-600
0.278086	0.22044	-600
0.260589	0.224647	-600
0.149969	0.265866	-600
0.33535	0.183192	-600
0.207324	0.228093	-600
0.300725	0.188994	-600
0.192774	0.222971	-600
0.12586	0.245162	-600
0.349247	0.158288	-600
0.261678	0.183306	-600
0.276676	0.172887	-600
0.264715	0.160731	-600
0.266984	0.143783	-600
0.167835	0.175364	-600
0.0970312	0.200308	-600
0.333783	0.0936791	-600
0.12612	0.1644	-600
0.269646	0.105411	-600
0.238621	0.10811	-600
0.341933	0.060779	-600
0.17028	0.116503	-600
0.351697	0.041603	-600
0.277433	0.0640165	-600
0.171423	0.107046	-600
0.231797	0.0731839	-600
0.0823537	0.130523	-600
0.185931	0.0870156	-600
0.143635	0.095907	-600
0.124601	0.090731	-600
0.256058	0.0319107	-600
0.0868429	0.0939012	-600
0.119023	0.0750954	-600
0.122024	0.0534088	-600
0.209073	0.0161808	-600
0.153079	0.0216799	-600
0.162148	0.020327	-600
0.130325	0.00483944	-600
0.0538639	0.0288549	-600
0.28099	-0.0056839	-600
0.312584	-0.0303913	-600
0.250927	-0.0260246	-600
0.281891	-0.0457746	-600
0.347541	-0.0932256	-600
0.289484	-0.0851628	-600
0.118237	-0.00978717	-600
0.144827	-0.0398512	-600
0.312874	-0.124647	-600
0.0384362	-0.0856737	-600
0.204015	-0.165472	-600
0.314556	-0.218152	-600
0.248047	-0.291843	-600
0.226243	-0.282112	-600
0.193663	-0.268804	-600
0.22908	-0.317564	-600
0.255289	-0.366117	-600
-0.134625	0.228003	-600
-0.111814	0.190446	-600
-0.0976187	0.0823979	-600
-0.167065	0.099623	-600
-0.0234864	0.0194293	-600
-0.14141	-0.142505	-600
-0.100273	-0.2075	-600
-0.169463	-0.204208	-600
0.0514916	0.0183726	-540
0.107764	0.00758052	-540
0.141286	0.0129397	-540
0.0757492	0.0517657	-540
0.0888329	0.052796	-540
0.0296833	0.0929868	-540
0.170634	0.0124781	-540
0.103622	0.055111	-540
0.0387365	0.0910733	-540
0.0990271	0.0632	-540
0.115776	0.0595937	-540
0.0483664	0.103505	-540
0.169028	0.0397425	-540
0.0776901	0.106442	-540
0.160992	0.0668732	-540
0.0949656	0.112477	-540
0.0883865	0.130849	-540
0.059317	0.149162	-540
0.204447	0.0708407	-540
0.272737	0.0313391	-540
0.198823	0.0794316	-540
0.179619	0.0991222	-540
0.0416137	0.184321	-540
0.141186	0.127263	-540
0.324166	0.016071	-540
0.0647924	0.175362	-540
0.0532898	0.187372	-540
0.255988	0.074815	-540
0.206326	0.11245	-540
0.213513	0.112122	-540
0.239885	0.0966266	-540
0.336301	0.0457307	-540
0.0749679	0.201744	-540
0.381853	0.0202727	-540
0.286583	0.0855468	-540
0.246985	0.122299	-540
0.12933	0.18135	-540
0.105805	0.196364	-540
0.301341	0.0989215	-540
0.283545	0.109787	-540
0.0976815	0.223047	-540
0.106871	0.220411	-540
0.0755694	0.245193	-540
0.295854	0.121168	-540
0.178398	0.198766	-540
0.0823779	0.255376	-540
0.242576	0.17486	-540
0.258983	0.167748	-540
0.339017	0.125972	-540
0.139029	0.241694	-540
0.136908	0.250806	-540
0.332023	0.139106	-540
0.0646435	0.300504	-540
0.34763	0.136101	-540
0.289895	0.181484	-540
0.312962	0.166939	-540
0.326641	0.172853	-540
0.317755	0.180186	-540
0.268787	0.215888	-540
0.260087	0.222237	-540
0.105259	0.318877	-540
0.38623	0.165781	-540
0.399637	0.163259	-540
0.20978	0.295259	-540
0.158214	0.327548	-540
0.165382	0.34101	-540
0.256348	0.291439	-540
0.151424	0.360319	-540
0.299072	0.270959	-540
0.243469	0.299802	-540
0.180053	0.354157	-540
0.272594	-0.370646	-540
0.200479	-0.298847	-540
0.317984	-0.342334	-540
0.250116	-0.294456	-540
0.30797	-0.294659	-540
0.250098	-0.245928	-540
0.219937	-0.230376	-540
0.00703173	-0.0832634	-540
0.238707	-0.1918	-540
0.216012	-0.171417	-540
0.376743	-0.243041	-540
0.239302	-0.155785	-540
0.060613	-0.0345538	-540
0.251524	-0.122056	-540
0.362171	-0.18307	-540
0.374244	-0.161478	-540
0.13976	-0.0127597	-540
0.302085	-0.104566	-540
0.38713	-0.153398	-540
0.191996	-0.0123691	-540
0.231886	-0.0353061	-540
0.248151	-0.039053	-540
0.258221	-0.0201956	-540
0.386894	-0.0759143	-540
0.309855	-0.00195301	-540
-0.00815014	0.0219428	-540
-0.126094	0.197572	-540
-0.104197	0.241805	-540
-0.163939	-0.217607	-540
-0.18954	-0.18617	-540
-0.126779	-0.227785	-540
-0.202132	-0.1709	-540
-0.217362	-0.146303	-540
-0.194051	-0.112474	-540
-0.169328	-0.134077	-540
-0.190691	-0.0768261	-540
-0.0863283	-0.142385	-540
-0.134624	-0.0782013	-540
-0.119972	-0.0802212	-540
-0.0757112	-0.0848339	-540
-0.0685511	-0.0253986	-540
-0.00880836	-0.0596788	-540
0.0124827	0.0324673	-480
0.131413	0.00916657	-480
0.138336	0.0146965	-480
0.15467	0.0219573	-480
0.213473	0.00173709	-480
0.162258	0.0361352	-480
0.175985	0.0427398	-480
0.048458	0.0978455	-480
0.120047	0.0767755	-480
0.0917235	0.0956335	-480
0.244726	0.0238506	-480
0.11031	0.0898912	-480
0.18837	0.0631413	-480
0.0671878	0.125758	-480
0.322304	0.010385	-480
0.185281	0.0760319	-480
0.269319	0.0443832	-480
0.0428012	0.153763	-480
0.283257	0.0415651	-480
0.143053	0.107325	-480
0.330334	0.034598	-480
0.294857	0.0513378	-480
0.304916	0.0624977	-480
0.244348	0.112423	-480
0.336713	0.0765006	-480
[truncated: 2,061 more rows]
