# Supplementary material for: Spinal premotor interneurons controlling antagonistic muscles are spatially intermingled
Source: eLife. 2022 Dec 13;11:e81976. doi: 10.7554/eLife.81976 (PMC9844990; doi:10.7554/eLife.81976)
Supplement: Figure 12—figure supplement 13—source data 6. [file elife-81976-fig12-figsupp13-data6.xlsx]

## Sheet: Sheet1
0.153188	0.220903	-3420
0.142559	0.193431	-3420
0.00241955	0.200818	-3420
0.150242	0.0724258	-3420
0.318977	-0.0184691	-3420
0.299188	-0.00863994	-3420
0.146332	-0.00156943	-3420
0.281884	-0.0800003	-3420
0.315441	-0.165704	-3420
0.060287	-0.0526891	-3420
0.27801	-0.171367	-3420
-0.0556784	-0.0885455	-3420
-0.191538	-0.350503	-3420
0.240852	0.336255	-3360
0.304898	0.260121	-3360
0.260992	0.259451	-3360
0.304525	0.153784	-3360
0.225006	0.0676672	-3360
0.0479747	0.184068	-3360
0.0604559	0.119007	-3360
0.141622	0.0469313	-3360
0.153033	0.0352397	-3360
0.10508	0.0618575	-3360
0.354802	-0.116604	-3360
0.231855	-0.0425189	-3360
0.165198	-0.0294907	-3360
0.0847213	-0.00957709	-3360
0.240366	-0.306863	-3360
-0.111917	0.178457	-3360
-0.209014	0.0568387	-3360
-0.102163	-0.0606835	-3360
-0.130899	-0.163349	-3360
-0.105404	-0.188643	-3360
-0.177378	-0.334505	-3360
0.196403	0.277884	-3300
0.175589	0.251717	-3300
0.177758	0.216055	-3300
0.148781	0.204583	-3300
0.174497	0.163847	-3300
0.202993	0.128413	-3300
0.195874	0.108499	-3300
0.107874	0.117815	-3300
0.129539	0.0993491	-3300
0.256436	0.0241077	-3300
0.23151	0.0339851	-3300
0.107915	0.0761563	-3300
0.104435	0.0603595	-3300
0.0590032	0.0433842	-3300
0.335697	-0.0280608	-3300
0.281561	-0.0275018	-3300
0.257109	-0.0499179	-3300
0.226066	-0.0443635	-3300
-0.102131	0.24137	-3300
-0.0996807	-0.174113	-3300
-0.202866	-0.17898	-3300
-0.192937	-0.185207	-3300
-0.170395	-0.232907	-3300
-0.253768	-0.200076	-3300
-0.267466	-0.212374	-3300
0.146392	0.322257	-3240
0.34486	0.20734	-3240
0.24184	0.160559	-3240
0.133379	0.207434	-3240
0.166211	0.110933	-3240
0.379844	0.00290682	-3240
0.326275	-0.0146175	-3240
0.27666	-0.0496763	-3240
0.197501	-0.0732301	-3240
0.225393	-0.349018	-3240
-0.0757271	0.243633	-3240
-0.162189	0.0690115	-3240
-0.0508197	-0.0142727	-3240
-0.10655	-0.0608468	-3240
-0.0993201	-0.0697412	-3240
-0.223457	-0.278278	-3240
0.1946	0.303324	-3180
0.348075	0.222033	-3180
0.322205	0.156261	-3180
0.196796	0.139027	-3180
0.166961	0.142532	-3180
0.121467	0.0770426	-3180
0.0609148	0.0930698	-3180
0.0954955	0.0561564	-3180
0.0291385	0.04692	-3180
0.299096	-0.123171	-3180
0.263848	-0.197844	-3180
0.260066	-0.224748	-3180
0.256116	-0.251456	-3180
0.174222	-0.202537	-3180
0.243253	-0.272293	-3180
0.222767	-0.311789	-3180
0.212941	-0.312312	-3180
0.205499	-0.315827	-3180
-0.168778	0.231503	-3180
-0.0882618	0.146358	-3180
-0.258696	0.150115	-3180
0.224833	0.383117	-3120
0.220624	0.363184	-3120
0.158733	0.411524	-3120
0.178834	0.306596	-3120
0.263372	0.13675	-3120
0.17019	0.199088	-3120
0.151253	0.20956	-3120
0.0602547	0.275753	-3120
0.11036	0.229972	-3120
0.254536	0.0371545	-3120
0.225825	0.0486658	-3120
0.112735	0.143724	-3120
0.139577	0.0880023	-3120
0.0372931	0.165605	-3120
0.143273	0.0165788	-3120
0.0462177	0.0874823	-3120
0.100655	0.0307004	-3120
0.275971	-0.0396103	-3120
0.161834	-0.0523498	-3120
-0.0434736	0.0723521	-3120
-0.238168	0.145122	-3120
-0.0798609	-0.113857	-3120
-0.210771	-0.112202	-3120
-0.242304	-0.174862	-3120
0.260264	0.354605	-3060
0.197833	0.346047	-3060
0.184353	0.279156	-3060
0.194508	0.256887	-3060
0.227275	0.157856	-3060
0.286424	0.123263	-3060
0.261245	0.13572	-3060
0.299222	0.08189	-3060
0.169893	0.140404	-3060
0.138357	0.15322	-3060
0.129746	0.144298	-3060
0.16156	0.123687	-3060
0.109304	0.133744	-3060
0.245519	0.0591505	-3060
0.159884	0.0774522	-3060
0.0575769	0.0967688	-3060
0.323538	-0.124643	-3060
0.260035	-0.122984	-3060
-0.27858	0.162137	-3060
-0.238972	0.115056	-3060
-0.0264413	-0.0176455	-3060
-0.145662	-0.141457	-3060
-0.118454	-0.174093	-3060
-0.171446	-0.153995	-3060
-0.170993	-0.25522	-3060
0.2681	0.306927	-3000
0.160151	0.301603	-3000
0.228066	0.237828	-3000
0.274791	0.203729	-3000
0.191283	0.242734	-3000
0.288804	0.150075	-3000
0.184821	0.190808	-3000
0.0845409	0.231564	-3000
0.346831	0.110212	-3000
0.315921	0.119221	-3000
0.376201	0.0795718	-3000
0.307067	0.111153	-3000
0.277086	0.100239	-3000
0.181999	0.135494	-3000
0.280345	0.0888424	-3000
0.125477	0.132844	-3000
0.322931	0.0341949	-3000
0.210226	0.0853414	-3000
0.277086	0.0482587	-3000
0.104496	0.110462	-3000
0.207688	0.0631799	-3000
0.318507	-0.0304866	-3000
0.297124	-0.12504	-3000
0.270922	-0.141645	-3000
0.230673	-0.167292	-3000
0.262616	-0.36055	-3000
-0.0131829	0.0747017	-3000
-0.255748	0.113134	-3000
-0.115931	-0.0499834	-3000
-0.0804738	-0.0838764	-3000
-0.0757451	-0.142975	-3000
-0.226038	-0.214533	-3000
0.00893389	0.0839901	-2940
0.0515613	0.0783059	-2940
0.098816	0.0658031	-2940
0.220114	0.0195615	-2940
0.0695142	0.0802867	-2940
0.296972	0.0151198	-2940
0.0978146	0.0957906	-2940
0.120683	0.0963788	-2940
0.211357	0.0641105	-2940
0.218956	0.0674958	-2940
0.315108	0.0284269	-2940
0.129918	0.108257	-2940
0.208189	0.0813551	-2940
0.109569	0.121636	-2940
0.0442571	0.179505	-2940
0.168553	0.140478	-2940
0.153689	0.15313	-2940
0.138557	0.167836	-2940
0.16011	0.170375	-2940
0.162126	0.181161	-2940
0.0812231	0.218898	-2940
0.184961	0.184024	-2940
0.330678	0.132525	-2940
0.0907133	0.237859	-2940
0.076838	0.250944	-2940
0.201598	0.201149	-2940
0.304485	0.163881	-2940
0.182546	0.240452	-2940
0.146575	0.261658	-2940
0.305768	0.231472	-2940
0.318511	0.244665	-2940
0.262925	0.276232	-2940
0.133629	0.331657	-2940
0.290859	0.275451	-2940
0.171851	0.325042	-2940
0.183259	0.35701	-2940
0.29025	0.333788	-2940
0.322471	0.347725	-2940
0.260523	0.409614	-2940
0.166164	-0.251533	-2940
0.107612	-0.0289577	-2940
0.342976	-0.0217605	-2940
-0.0871686	0.978426	-2940
-0.262879	-0.293875	-2940
-0.290719	-0.214274	-2940
-0.230821	-0.230957	-2940
-0.330476	-0.135898	-2940
-0.166258	-0.182011	-2940
-0.186945	-0.167708	-2940
-0.326281	-0.106386	-2940
-0.31821	-0.0863967	-2940
-0.169558	-0.142532	-2940
-0.110032	-0.100111	-2940
-0.126562	-0.0873637	-2940
0.0372017	0.026953	-2880
0.288716	0.00659993	-2880
0.0372731	0.121531	-2880
0.0306077	0.134103	-2880
0.0602353	0.137777	-2880
0.276378	0.0753544	-2880
0.0592813	0.169624	-2880
0.0867931	0.159916	-2880
0.174073	0.12946	-2880
0.226838	0.121052	-2880
0.124572	0.16639	-2880
0.114156	0.179213	-2880
0.187482	0.171085	-2880
0.172476	0.182687	-2880
0.16121	0.197479	-2880
0.184457	0.195248	-2880
0.0675043	0.243541	-2880
0.291578	0.154685	-2880
0.0936208	0.238191	-2880
0.131394	0.246964	-2880
0.319998	0.196344	-2880
0.32044	0.250529	-2880
0.297451	0.279912	-2880
0.367007	0.286387	-2880
0.266902	0.341382	-2880
0.0223392	-0.09176	-2880
-0.307426	0.081882	-2880
-0.242606	0.218136	-2880
-0.166431	0.292143	-2880
-0.129928	-0.193724	-2880
-0.175681	-0.160157	-2880
-0.0881718	-0.00584944	-2880
0.174502	0.00593474	-2820
0.145833	0.0525172	-2820
0.27035	0.00448566	-2820
0.0598303	0.151487	-2820
0.0958941	0.174827	-2820
0.27574	0.115732	-2820
0.136638	0.196807	-2820
0.260406	0.130108	-2820
0.304981	0.11701	-2820
0.216462	0.17227	-2820
0.144498	0.249976	-2820
0.336089	0.155972	-2820
0.224585	0.222459	-2820
0.269088	0.209059	-2820
0.131406	0.301117	-2820
0.20005	0.274854	-2820
0.323989	0.260787	-2820
0.19213	0.339461	-2820
0.302273	0.279804	-2820
0.292329	0.288368	-2820
0.216475	0.331426	-2820
0.289398	0.300287	-2820
0.130703	0.405948	-2820
0.156073	0.393191	-2820
0.153141	0.439016	-2820
0.00963542	-0.186593	-2820
0.0141968	-0.155331	-2820
0.0183704	-0.139836	-2820
0.125497	-0.0215367	-2820
0.312159	-0.149974	-2820
0.297949	-0.116018	-2820
0.221168	-0.0319356	-2820
0.304909	-0.00857338	-2820
-0.280302	0.16003	-2820
-0.23817	0.201018	-2820
-0.211104	0.252606	-2820
-0.25435	0.309313	-2820
-0.160557	-0.251475	-2820
-0.165615	-0.209687	-2820
-0.114535	-0.185341	-2820
-0.0868736	-0.139158	-2820
-0.0856378	-0.0936041	-2820
-0.0453821	-0.0514295	-2820
0.179106	0.411847	-2760
0.313269	0.301553	-2760
0.268306	0.318965	-2760
0.377905	0.226155	-2760
0.211901	0.295739	-2760
0.180133	0.271202	-2760
0.117792	0.296121	-2760
0.221087	0.179486	-2760
0.272328	0.0721456	-2760
0.0707538	0.171999	-2760
0.098926	0.0946794	-2760
0.113783	0.0386339	-2760
0.284023	-0.0617057	-2760
0.107225	-0.0450857	-2760
-0.193607	0.229621	-2760
-0.188594	0.208663	-2760
-0.0902828	0.094203	-2760
-0.0814793	-0.163468	-2760
-0.176282	-0.159229	-2760
-0.234237	-0.198779	-2760
0.388431	0.153493	-2700
0.23465	0.306171	-2700
0.161138	0.381302	-2700
0.148906	0.389011	-2700
0.0857856	0.442696	-2700
0.305349	0.205221	-2700
0.176868	0.325765	-2700
0.136239	0.35526	-2700
0.141134	0.31388	-2700
0.322303	0.116275	-2700
0.166939	0.204775	-2700
0.116063	0.238828	-2700
0.184383	0.150144	-2700
0.100071	0.208859	-2700
0.110947	0.152954	-2700
0.122424	0.090496	-2700
0.178382	0.0176107	-2700
0.300018	-0.0606507	-2700
0.267943	-0.0911795	-2700
0.0178389	-0.061978	-2700
0.0827295	-0.163418	-2700
0.0537794	-0.228893	-2700
-0.188223	0.346705	-2700
-0.106933	0.0800714	-2700
-0.115966	0.077129	-2700
-0.0977861	-0.0361565	-2700
-0.0864929	-0.0816556	-2700
-0.197976	-0.0633209	-2700
-0.230006	-0.254134	-2700
0.211047	0.353044	-2640
0.183416	0.348635	-2640
0.313471	0.242531	-2640
0.173642	0.314008	-2640
0.262006	0.224634	-2640
0.175458	0.269173	-2640
0.213735	0.229446	-2640
0.232598	0.215305	-2640
0.188625	0.22786	-2640
0.301035	0.10812	-2640
0.182384	0.1685	-2640
0.234541	0.0835344	-2640
0.309918	0.0217892	-2640
0.218998	0.0798581	-2640
0.222817	0.0255395	-2640
0.103474	0.064662	-2640
0.314662	-0.00628539	-2640
-0.224354	0.362601	-2640
-0.116344	0.194451	-2640
-0.18403	0.217292	-2640
-0.0858181	0.111779	-2640
-0.0662533	-0.0645457	-2640
-0.0841168	-0.0758872	-2640
-0.113755	-0.0922954	-2640
-0.108442	-0.135807	-2640
-0.196365	-0.178906	-2640
-0.161921	-0.22661	-2640
-0.258499	-0.26919	-2640
0.0338032	0.0444512	-2580
0.0678866	0.0644693	-2580
0.0426893	0.0804966	-2580
0.242026	0.0172298	-2580
0.214981	0.0330421	-2580
0.325537	0.0314969	-2580
0.118955	0.0998466	-2580
0.102944	0.109257	-2580
0.311928	0.042418	-2580
0.210805	0.0801538	-2580
0.336438	0.0535075	-2580
0.140857	0.119632	-2580
0.150497	0.120068	-2580
0.130556	0.180994	-2580
0.3013	0.131779	-2580
0.268798	0.143002	-2580
0.159229	0.192008	-2580
0.203353	0.18183	-2580
0.193006	0.200042	-2580
0.365718	0.148823	-2580
0.0856922	0.242454	-2580
0.078187	0.254392	-2580
0.13107	0.23679	-2580
0.0981407	0.252109	-2580
0.124105	0.25607	-2580
0.167041	0.241832	-2580
0.273081	0.214547	-2580
0.128161	0.267654	-2580
0.293989	0.215697	-2580
0.285182	0.234896	-2580
0.159389	0.339623	-2580
0.200464	0.350788	-2580
0.394531	0.437204	-2580
0.404364	0.448142	-2580
0.137081	-0.0213039	-2580
0.219604	-0.0671106	-2580
0.266156	-0.0378531	-2580
-0.273994	0.104812	-2580
-0.122381	0.0292047	-2580
-0.245077	-0.26145	-2580
-0.184482	-0.27668	-2580
-0.235822	-0.226803	-2580
-0.153535	-0.24249	-2580
-0.140806	-0.186192	-2580
-0.143158	-0.154934	-2580
-0.14418	-0.129343	-2580
-0.111873	-0.0618444	-2580
-0.12514	-0.0582943	-2580
-0.132227	-0.0123783	-2580
0.178515	0.0888528	-2520
0.195354	0.10566	-2520
0.175865	0.12085	-2520
0.104462	0.142427	-2520
0.119428	0.139984	-2520
0.151546	0.134225	-2520
0.362255	0.0796435	-2520
0.258413	0.108656	-2520
0.225034	0.118453	-2520
0.141035	0.156047	-2520
0.220586	0.140927	-2520
0.114346	0.181103	-2520
0.129108	0.174099	-2520
0.27389	0.138989	-2520
0.393249	0.122077	-2520
0.178474	0.183186	-2520
0.235402	0.174483	-2520
0.221471	0.180167	-2520
0.0911785	0.219756	-2520
0.361935	0.149496	-2520
0.222405	0.189574	-2520
0.172813	0.199464	-2520
0.291396	0.180103	-2520
0.181512	0.20833	-2520
0.186076	0.21591	-2520
0.288699	0.21146	-2520
0.144782	0.251305	-2520
0.0818869	0.278101	-2520
0.243018	0.24718	-2520
0.178277	0.291237	-2520
0.231131	0.306398	-2520
0.237268	0.358692	-2520
0.0859877	-0.0836419	-2520
0.161553	-0.115998	-2520
-0.387682	0.193751	-2520
-0.282364	-0.267862	-2520
-0.149427	-0.271889	-2520
-0.222881	-0.217471	-2520
-0.177671	-0.227787	-2520
-0.106879	-0.213176	-2520
-0.154996	-0.169028	-2520
-0.0692529	-0.0983702	-2520
-0.195521	-0.0520322	-2520
-0.239705	-0.000738741	-2520
-0.0525028	-0.0468806	-2520
0.182003	0.400594	-2460
0.290479	0.330756	-2460
0.269855	0.335777	-2460
0.153742	0.385024	-2460
0.366803	0.28221	-2460
0.23354	0.334455	-2460
0.375672	0.260157	-2460
0.302904	0.28868	-2460
0.1735	0.335884	-2460
0.181838	0.328653	-2460
0.346855	0.244607	-2460
0.325587	0.23586	-2460
0.211704	0.284747	-2460
0.1415	0.313317	-2460
0.132278	0.306453	-2460
0.170828	0.283098	-2460
0.186835	0.267695	-2460
0.141961	0.287298	-2460
0.259761	0.227434	-2460
0.203252	0.242624	-2460
0.120863	0.274972	-2460
0.154651	0.256011	-2460
0.152851	0.242117	-2460
0.315259	0.1686	-2460
0.324576	0.15745	-2460
0.118286	0.22903	-2460
0.22543	0.180344	-2460
0.19679	0.193337	-2460
0.215487	0.138588	-2460
0.369166	0.0717209	-2460
0.128892	0.162604	-2460
0.17458	0.131898	-2460
0.0807651	0.177046	-2460
0.262054	0.0865966	-2460
0.0531043	0.159032	-2460
0.320174	0.0276348	-2460
0.346906	0.0120047	-2460
0.0322909	0.148389	-2460
0.204768	0.0741512	-2460
0.130231	0.10005	-2460
0.053098	0.135283	-2460
0.231191	0.048673	-2460
0.109329	0.10453	-2460
0.0716375	0.0995961	-2460
0.0535023	0.0985278	-2460
0.128627	0.0317409	-2460
0.0920025	0.0194091	-2460
0.0721491	0.0107161	-2460
0.328531	-0.103724	-2460
0.116429	-0.0290745	-2460
0.295444	-0.160798	-2460
0.0468698	-0.0606657	-2460
0.0238455	-0.11987	-2460
-0.123516	0.21545	-2460
-0.327762	0.25333	-2460
-0.123516	0.133506	-2460
-0.0864661	0.0594248	-2460
-0.347202	0.155946	-2460
-0.00107287	-0.0619901	-2460
-0.106793	-0.0966947	-2460
-0.0431437	-0.129232	-2460
-0.13212	-0.144758	-2460
-0.190084	-0.277802	-2460
0.0442875	0.0629331	-2400
0.117622	0.0467334	-2400
0.103984	0.0802639	-2400
0.253513	0.0221413	-2400
0.239144	0.0397192	-2400
0.213037	0.0542547	-2400
0.275687	0.0398622	-2400
0.0995641	0.125704	-2400
0.146001	0.114503	-2400
0.253614	0.0640902	-2400
0.106059	0.134811	-2400
0.137756	0.137717	-2400
0.107039	0.187733	-2400
0.327936	0.0903335	-2400
0.203866	0.164084	-2400
0.0959484	0.219067	-2400
0.266272	0.151206	-2400
0.326638	0.139888	-2400
0.223262	0.215355	-2400
0.123617	0.284392	-2400
0.28329	0.217363	-2400
0.158105	0.28055	-2400
0.160491	0.292856	-2400
0.375062	0.24401	-2400
0.327942	0.290912	-2400
0.426912	0.278788	-2400
0.403068	0.313385	-2400
0.409002	0.371599	-2400
0.238766	-0.269428	-2400
0.023634	-0.0769083	-2400
0.215808	-0.227616	-2400
0.0680228	-0.110898	-2400
0.0851553	-0.0260091	-2400
0.242679	-0.136387	-2400
0.244443	-0.0964406	-2400
-0.375426	0.216114	-2400
-0.383175	-0.285308	-2400
-0.244975	-0.295208	-2400
-0.186176	-0.234904	-2400
-0.313367	-0.148209	-2400
-0.153158	-0.169912	-2400
0.0175249	0.0227286	-2340
0.113331	0.0311735	-2340
0.0434124	0.0861376	-2340
0.106	0.068563	-2340
0.178627	0.0394152	-2340
0.038409	0.10171	-2340
0.307684	0.0221076	-2340
0.13693	0.0927891	-2340
0.116323	0.104026	-2340
0.346699	0.0371864	-2340
0.291875	0.0586904	-2340
0.0259778	0.16083	-2340
0.136685	0.124555	-2340
0.233349	0.0896723	-2340
0.149355	0.133168	-2340
0.279211	0.0926556	-2340
0.0666241	0.183477	-2340
0.162914	0.14697	-2340
0.402175	0.058731	-2340
0.267586	0.114142	-2340
0.105536	0.181045	-2340
0.0884818	0.190976	-2340
0.120127	0.179327	-2340
0.301108	0.123376	-2340
0.167724	0.191179	-2340
0.0897456	0.224599	-2340
0.129302	0.211981	-2340
0.345403	0.131165	-2340
0.23627	0.198794	-2340
0.285614	0.178474	-2340
0.137007	0.235673	-2340
0.172109	0.228232	-2340
0.27965	0.19826	-2340
0.148755	0.245702	-2340
0.149445	0.257148	-2340
0.164004	0.260839	-2340
0.274272	0.237681	-2340
0.343605	0.222492	-2340
0.279579	0.276876	-2340
0.157982	0.344707	-2340
0.386456	0.301839	-2340
0.181567	-0.214779	-2340
0.19071	-0.032514	-2340
0.26963	-0.069548	-2340
-0.351807	0.0931827	-2340
-0.400679	0.132962	-2340
-0.239694	0.107649	-2340
-0.00756339	0.0386487	-2340
-0.160917	0.193142	-2340
-0.18236	0.256933	-2340
-0.195968	0.429066	-2340
-0.320745	-0.266116	-2340
-0.160222	-0.223695	-2340
-0.121052	-0.181138	-2340
-0.171026	-0.151384	-2340
-0.117879	-0.139742	-2340
-0.139738	-0.0913055	-2340
-0.0108653	-0.103084	-2340
-0.0137894	-0.0812016	-2340
0.360285	0.28621	-2280
0.273734	0.309587	-2280
0.207067	0.308284	-2280
0.191034	0.290628	-2280
0.320984	0.22291	-2280
0.218072	0.237309	-2280
0.170882	0.239326	-2280
0.330559	0.152327	-2280
0.181333	0.225929	-2280
0.391769	0.11703	-2280
0.160833	0.226372	-2280
0.372962	0.108456	-2280
0.152529	0.216507	-2280
0.159349	0.214304	-2280
0.171511	0.203868	-2280
0.143249	0.21722	-2280
0.212583	0.179295	-2280
0.172427	0.194908	-2280
0.294019	0.109869	-2280
0.36439	0.0731709	-2280
0.175054	0.151904	-2280
0.18501	0.144845	-2280
0.148852	0.146072	-2280
0.110688	0.161557	-2280
0.40357	0.00872168	-2280
0.114726	0.148924	-2280
0.111243	0.128173	-2280
0.126728	0.10168	-2280
0.121439	0.108032	-2280
0.0717481	0.128064	-2280
0.10919	0.105424	-2280
0.112125	0.0731902	-2280
0.107518	0.0641795	-2280
0.247364	-0.18229	-2280
-0.182654	0.32853	-2280
-0.0124721	0.145029	-2280
-0.0291795	0.059304	-2280
-0.121478	-0.080831	-2280
-0.172509	-0.175522	-2280
-0.21509	-0.17444	-2280
-0.265539	-0.255113	-2280
0.190378	0.418067	-2220
0.192165	0.379815	-2220
0.197954	0.363318	-2220
0.345169	0.275465	-2220
0.191239	0.350512	-2220
0.375913	0.239314	-2220
0.182329	0.32982	-2220
0.167039	0.334651	-2220
0.258818	0.284987	-2220
0.141098	0.343759	-2220
0.3207	0.214771	-2220
0.195431	0.266975	-2220
0.311679	0.17025	-2220
0.353475	0.131667	-2220
0.118475	0.254659	-2220
0.20122	0.204282	-2220
0.133765	0.23174	-2220
0.0968908	0.232599	-2220
0.241866	0.153173	-2220
0.183124	0.18361	-2220
0.322744	0.100066	-2220
0.137451	0.170059	-2220
0.163576	0.142347	-2220
0.116123	0.161505	-2220
0.139679	0.145657	-2220
0.180088	0.114393	-2220
0.108324	0.150729	-2220
0.111504	0.120427	-2220
0.190647	0.0703811	-2220
0.0651348	0.135982	-2220
0.101398	0.0982013	-2220
0.092403	0.064411	-2220
0.119474	0.0435538	-2220
-0.243272	0.304265	-2220
-0.146259	0.00174946	-2220
-0.0370945	-0.0499513	-2220
-0.10204	-0.0805191	-2220
-0.155636	-0.135226	-2220
-0.192388	-0.113952	-2220
-0.171859	-0.233675	-2220
-0.193682	-0.240097	-2220
-0.225931	-0.248571	-2220
-0.261669	-0.30814	-2220
0.250955	0.408394	-2160
0.233541	0.378347	-2160
0.205435	0.352734	-2160
0.190372	0.347593	-2160
0.194879	0.340783	-2160
0.194049	0.303819	-2160
0.171403	0.299565	-2160
0.263327	0.246684	-2160
0.258304	0.239886	-2160
0.240008	0.198458	-2160
0.350462	0.1284	-2160
0.335935	0.130811	-2160
0.315432	0.131453	-2160
0.242144	0.159478	-2160
0.171351	0.181395	-2160
0.286881	0.105259	-2160
0.0836866	0.197234	-2160
0.111134	0.15871	-2160
0.276051	0.0747143	-2160
0.279049	0.0664287	-2160
0.160756	0.1158	-2160
0.0777948	0.156334	-2160
0.112564	0.127104	-2160
0.0574676	0.146423	-2160
0.0870636	0.129996	-2160
0.0261472	0.0942013	-2160
0.318469	-0.177411	-2160
0.0532806	-0.0557877	-2160
0.0287403	-0.0373161	-2160
0.00683236	-0.134413	-2160
-0.122198	0.249992	-2160
-0.0407846	0.196834	-2160
-0.0506769	0.0927209	-2160
-0.25065	0.164955	-2160
-0.0134343	0.0387075	-2160
-0.0143531	0.0289257	-2160
-0.104236	0.00643217	-2160
-0.380777	0.10528	-2160
-0.328996	0.0616969	-2160
-0.0690611	-0.0629732	-2160
-0.0920172	-0.0562331	-2160
-0.118575	-0.131709	-2160
-0.110527	-0.157455	-2160
-0.0899128	-0.198368	-2160
-0.213415	-0.151252	-2160
-0.168385	-0.174571	-2160
-0.102991	-0.241562	-2160
-0.277111	-0.198809	-2160
-0.253814	-0.27539	-2160
0.169266	0.527578	-2100
0.14156	0.566261	-2100
0.176927	0.456507	-2100
0.35579	0.146286	-2100
0.0920704	0.499749	-2100
0.182618	0.337563	-2100
0.0632772	0.527894	-2100
0.29864	0.0866991	-2100
0.0355598	0.540554	-2100
0.173716	0.283281	-2100
0.0721784	0.444277	-2100
0.26517	0.0983555	-2100
0.280803	0.0642178	-2100
0.216173	0.171032	-2100
0.0703551	0.419832	-2100
0.0757967	0.383801	-2100
0.0437929	0.426241	-2100
0.107036	0.308114	-2100
0.130818	0.268083	-2100
0.173898	0.19218	-2100
0.15246	0.214633	-2100
0.227124	0.0733078	-2100
0.240867	0.0482888	-2100
0.109969	0.253875	-2100
0.0561539	0.324889	-2100
0.158666	0.029564	-2100
0.0509445	0.200381	-2100
0.0560689	0.143533	-2100
0.019422	0.119088	-2100
0.301783	-0.0836565	-2100
0.221932	-0.159007	-2100
0.0722747	-0.0369283	-2100
0.111243	-0.108255	-2100
0.0100337	-0.0655501	-2100
0.0100337	-0.121995	-2100
-0.179051	0.238682	-2100
-0.0994018	0.0840177	-2100
-0.37485	0.144286	-2100
-0.0758315	-0.0800015	-2100
-0.0778577	-0.112508	-2100
-0.170878	-0.0523106	-2100
-0.225985	-0.124682	-2100
-0.165137	-0.179587	-2100
-0.231292	-0.196592	-2100
0.376181	0.26178	-2040
0.205776	0.434133	-2040
0.134513	0.496358	-2040
0.205865	0.404828	-2040
0.143737	0.4666	-2040
0.0923328	0.507589	-2040
0.203893	0.372711	-2040
0.130498	0.428095	-2040
0.191846	0.353525	-2040
0.108105	0.445467	-2040
0.200598	0.33809	-2040
0.100978	0.409568	-2040
0.187913	0.308735	-2040
0.20097	0.291414	-2040
0.363934	0.0955065	-2040
0.291354	0.1587	-2040
0.122213	0.334772	-2040
0.285147	0.127376	-2040
0.190825	0.221183	-2040
0.107078	0.272063	-2040
0.0981907	0.277071	-2040
0.150144	0.174918	-2040
0.106517	0.219421	-2040
0.181494	0.102946	-2040
0.0287403	0.188107	-2040
0.137968	0.0650895	-2040
0.158701	0.0061308	-2040
0.279484	-0.0536394	-2040
0.261113	-0.0446331	-2040
0.258923	-0.0630343	-2040
0.284025	-0.0915875	-2040
0.278675	-0.142736	-2040
0.227897	-0.138143	-2040
0.213559	-0.148176	-2040
0.0801032	-0.0327176	-2040
0.214351	-0.242443	-2040
0.0179044	-0.0746807	-2040
-0.122905	0.253659	-2040
-0.111058	0.207609	-2040
-0.112088	0.180704	-2040
-0.0483729	0.13677	-2040
-0.235045	0.179723	-2040
-0.00344304	0.0254786	-2040
-0.24975	0.172393	-2040
-0.329703	0.216902	-2040
-0.220177	0.0555884	-2040
-0.384206	0.149682	-2040
-0.402132	0.0905132	-2040
-0.113213	-0.055187	-2040
-0.0457962	-0.130676	-2040
-0.0872756	-0.109515	-2040
-0.195831	-0.0511661	-2040
-0.133649	-0.140922	-2040
-0.105165	-0.214319	-2040
-0.196898	-0.189215	-2040
-0.175847	-0.263119	-2040
-0.332679	-0.223149	-2040
0.214151	0.389074	-1980
0.183999	0.353739	-1980
0.156074	0.335114	-1980
0.288018	0.260229	-1980
0.263002	0.271157	-1980
0.152022	0.28623	-1980
0.207815	0.242687	-1980
0.215708	0.236628	-1980
0.170225	0.258258	-1980
0.226987	0.228635	-1980
0.0921207	0.28635	-1980
0.243824	0.201097	-1980
0.361152	0.138646	-1980
0.11142	0.255234	-1980
0.125099	0.247978	-1980
0.186245	0.213707	-1980
0.290098	0.159507	-1980
0.0936072	0.253811	-1980
0.36796	0.0968859	-1980
0.0918527	0.235797	-1980
0.312543	0.119051	-1980
0.223721	0.157586	-1980
0.392338	0.0703623	-1980
0.202482	0.153479	-1980
0.301684	0.0956892	-1980
0.399126	0.0324444	-1980
0.110527	0.169787	-1980
0.175794	0.131579	-1980
0.146402	0.129834	-1980
0.131326	0.133544	-1980
0.303675	0.0399209	-1980
0.153381	0.115152	-1980
0.318898	0.0305548	-1980
0.332487	0.0170127	-1980
0.0858683	0.0938752	-1980
0.00975501	0.116569	-1980
0.158855	-0.146827	-1980
-0.162446	0.368262	-1980
-0.155552	0.246937	-1980
-0.333956	0.197906	-1980
-0.103826	0.00547535	-1980
-0.0156142	-0.10242	-1980
-0.101577	-0.0921886	-1980
-0.0766939	-0.10772	-1980
-0.158447	-0.137932	-1980
-0.188875	-0.182855	-1980
-0.165264	-0.216345	-1980
0.145083	0.402453	-1920
0.263408	0.341548	-1920
0.369429	0.284054	-1920
0.216469	0.326764	-1920
0.165487	0.331582	-1920
0.196901	0.293495	-1920
0.288915	0.229539	-1920
0.380997	0.187817	-1920
0.263873	0.218922	-1920
0.151734	0.252801	-1920
0.258646	0.204274	-1920
0.148334	0.242952	-1920
0.116344	0.244507	-1920
0.122146	0.239417	-1920
0.352437	0.157367	-1920
0.217008	0.197511	-1920
0.166986	0.212727	-1920
0.161072	0.20467	-1920
0.15252	0.198197	-1920
0.331612	0.123377	-1920
0.295479	0.136269	-1920
0.282623	0.138912	-1920
0.375467	0.105347	-1920
0.148204	0.185541	-1920
0.15631	0.180108	-1920
0.211868	0.158301	-1920
0.131627	0.184122	-1920
0.312397	0.109644	-1920
0.122227	0.164384	-1920
0.0770279	0.175988	-1920
0.149108	0.150699	-1920
0.156979	0.144823	-1920
0.332225	0.0756303	-1920
0.0593918	0.175586	-1920
0.0881743	0.160624	-1920
0.333593	0.0609523	-1920
0.0770526	0.132758	-1920
0.02233	0.126858	-1920
0.0885025	0.0851476	-1920
0.0275812	0.0942216	-1920
0.1735	0.0430349	-1920
0.138395	0.0279727	-1920
0.346077	-0.0320663	-1920
0.297467	-0.0304071	-1920
0.0612309	-0.0577193	-1920
0.0273397	-0.0851272	-1920
0.138853	-0.22139	-1920
-0.133833	0.259224	-1920
-0.20058	0.229406	-1920
-0.0631502	0.181682	-1920
-0.127499	0.19251	-1920
-0.124199	0.175563	-1920
-0.133268	0.0400845	-1920
-0.0425491	-0.0820277	-1920
-0.0821502	-0.0937984	-1920
-0.125623	-0.0874813	-1920
-0.309798	-0.0410173	-1920
-0.171163	-0.171345	-1920
-0.0936039	-0.219713	-1920
-0.306293	-0.192336	-1920
-0.145061	-0.257147	-1920
-0.171008	-0.264457	-1920
0.0148067	0.0283821	-1860
0.0507568	0.0244673	-1860
0.0354553	0.0915296	-1860
0.111255	0.065161	-1860
0.202352	0.0287561	-1860
0.0716395	0.0928449	-1860
0.192238	0.0468962	-1860
0.0505547	0.111415	-1860
0.093283	0.106621	-1860
0.135261	0.0969654	-1860
0.175473	0.0843172	-1860
0.282961	0.0442594	-1860
0.0589875	0.150476	-1860
0.049049	0.164601	-1860
0.171775	0.115268	-1860
0.168163	0.14312	-1860
0.106217	0.1699	-1860
0.220223	0.125273	-1860
0.250246	0.117462	-1860
0.111548	0.21035	-1860
0.154053	0.197833	-1860
0.121087	0.219383	-1860
0.321114	0.142821	-1860
0.123721	0.239194	-1860
0.144849	0.258094	-1860
0.244559	0.246213	-1860
0.169663	0.289787	-1860
0.314607	0.233203	-1860
0.0931819	0.327014	-1860
0.33159	0.226901	-1860
0.33516	0.248364	-1860
0.291964	0.290971	-1860
0.256434	0.318755	-1860
0.139815	0.404462	-1860
0.180245	0.391783	-1860
0.0085446	-0.191571	-1860
0.0554973	-0.192127	-1860
0.0140778	-0.132729	-1860
0.0535341	-0.126529	-1860
0.0191322	-0.0809845	-1860
0.120114	-0.140285	-1860
0.139954	-0.0716998	-1860
0.243558	-0.126588	-1860
0.292097	-0.119744	-1860
0.235407	-0.0476535	-1860
0.302509	-0.00671698	-1860
-0.392387	0.0089736	-1860
-0.409715	0.0487988	-1860
-0.405021	0.0603131	-1860
-0.317145	0.180723	-1860
-0.279013	0.211258	-1860
-0.035498	0.105274	-1860
-0.189992	-0.281372	-1860
-0.0761376	-0.28422	-1860
-0.151597	-0.243577	-1860
-0.160189	-0.234408	-1860
-0.15853	-0.184529	-1860
-0.176476	-0.169779	-1860
-0.115487	-0.165995	-1860
-0.0894691	-0.137492	-1860
-0.0292042	-0.00852104	-1860
0.305051	0.314913	-1800
0.223983	0.335473	-1800
0.211836	0.324173	-1800
0.234938	0.307676	-1800
0.313007	0.246238	-1800
0.300992	0.249875	-1800
0.353033	0.216189	-1800
0.19081	0.282618	-1800
0.142111	0.292122	-1800
0.231062	0.243345	-1800
0.200742	0.240636	-1800
0.34131	0.160861	-1800
0.277494	0.187789	-1800
0.189699	0.230721	-1800
0.23058	0.196196	-1800
0.258721	0.156444	-1800
0.162669	0.190446	-1800
0.0848557	0.225442	-1800
0.273457	0.127772	-1800
0.169602	0.151483	-1800
0.374863	0.0368953	-1800
0.0889073	0.168664	-1800
0.201663	0.101911	-1800
0.330727	0.0356217	-1800
0.144642	0.126645	-1800
0.121897	0.123068	-1800
0.194284	0.0838462	-1800
0.0521801	0.147861	-1800
0.103775	0.061313	-1800
0.0664336	0.0798342	-1800
0.321264	-0.00305171	-1800
0.186166	-0.0172846	-1800
0.245945	-0.0841058	-1800
0.141994	-0.00549562	-1800
0.103102	-0.0611609	-1800
0.233885	-0.28562	-1800
-0.138972	0.300802	-1800
-0.262226	0.258254	-1800
-0.0476092	0.0747724	-1800
-0.412107	0.0907115	-1800
-0.119406	-0.0129871	-1800
-0.02408	-0.0931702	-1800
-0.0395181	-0.0887346	-1800
-0.149588	-0.0764085	-1800
-0.19822	-0.0772971	-1800
-0.160347	-0.200579	-1800
-0.225891	-0.26046	-1800
-0.22376	-0.297452	-1800
0.401743	0.275811	-1740
0.299078	0.310881	-1740
0.255718	0.303207	-1740
0.162019	0.350056	-1740
0.196288	0.324757	-1740
0.237182	0.291944	-1740
0.157136	0.336921	-1740
0.189473	0.304018	-1740
0.139655	0.332205	-1740
0.123708	0.338394	-1740
0.138576	0.302191	-1740
0.159068	0.291596	-1740
0.172828	0.277946	-1740
0.101119	0.319327	-1740
0.19947	0.251573	-1740
0.161651	0.267564	-1740
0.114867	0.279394	-1740
0.201823	0.224511	-1740
0.117314	0.271115	-1740
0.103951	0.275901	-1740
0.236465	0.197294	-1740
0.133047	0.255381	-1740
0.208205	0.20318	-1740
0.0946655	0.264682	-1740
0.146695	0.229303	-1740
0.165906	0.212874	-1740
0.147998	0.216862	-1740
0.14052	0.215422	-1740
0.243262	0.150472	-1740
0.110328	0.223289	-1740
0.31445	0.0930798	-1740
0.0959574	0.222086	-1740
0.236531	0.132119	-1740
0.322076	0.08199	-1740
0.143335	0.187723	-1740
0.178582	0.152015	-1740
0.205123	0.132235	-1740
0.10404	0.179669	-1740
0.186682	0.131103	-1740
0.189355	0.122766	-1740
0.230302	0.0980586	-1740
0.140775	0.139234	-1740
0.102375	0.157811	-1740
0.199932	0.0964441	-1740
0.0959574	0.142849	-1740
0.160128	0.101732	-1740
0.126244	0.12139	-1740
0.0912048	0.133052	-1740
0.0633652	0.150208	-1740
0.0537831	0.147146	-1740
0.150742	0.0795263	-1740
0.0986596	0.066719	-1740
0.072811	0.0783234	-1740
0.14036	0.0124535	-1740
0.125018	0.0206808	-1740
0.362621	-0.0144037	-1740
0.178682	-0.0600371	-1740
0.19825	-0.101169	-1740
0.265336	-0.177174	-1740
0.0981322	-0.0791747	-1740
-0.318496	0.20542	-1740
-0.178144	-0.0572815	-1740
-0.0675266	-0.136251	-1740
-0.0870528	-0.160368	-1740
-0.0401926	-0.194461	-1740
-0.181638	-0.170649	-1740
-0.266343	-0.144943	-1740
-0.188333	-0.192108	-1740
-0.161817	-0.228414	-1740
-0.138266	-0.275993	-1740
0.262491	0.417213	-1680
0.201182	0.397652	-1680
0.258601	0.30423	-1680
0.347497	0.253187	-1680
0.207099	0.284335	-1680
0.187165	0.285562	-1680
0.24737	0.254948	-1680
0.234029	0.25428	-1680
0.164077	0.279072	-1680
0.190193	0.258791	-1680
0.134976	0.283898	-1680
0.154916	0.272408	-1680
0.116749	0.287284	-1680
0.183577	0.231621	-1680
0.119897	0.259318	-1680
0.214608	0.197705	-1680
0.0703257	0.256555	-1680
0.266978	0.158416	-1680
0.107431	0.232977	-1680
0.081725	0.242109	-1680
0.117244	0.222182	-1680
0.153963	0.185881	-1680
0.121936	0.200654	-1680
0.16275	0.172932	-1680
0.143462	0.173857	-1680
0.0664294	0.194749	-1680
0.418172	0.010044	-1680
0.0533836	0.195025	-1680
0.0852232	0.173144	-1680
0.272587	0.0827743	-1680
0.164946	0.135976	-1680
0.123335	0.143912	-1680
0.173305	0.118381	-1680
0.21146	0.0943798	-1680
0.138474	0.125546	-1680
0.343577	0.0255051	-1680
0.346182	0.0134305	-1680
0.138317	0.114313	-1680
0.269162	0.0500655	-1680
0.157147	0.0986659	-1680
0.0753317	0.129312	-1680
0.080392	0.119377	-1680
0.108444	0.101352	-1680
0.239071	0.0374769	-1680
0.0941134	0.097702	-1680
0.0554584	0.0677565	-1680
0.0656031	0.0554699	-1680
0.0443727	0.015127	-1680
0.342793	-0.122309	-1680
0.263353	-0.0636587	-1680
0.089813	-0.00770891	-1680
-0.103452	0.291248	-1680
-0.187359	0.312321	-1680
-0.213987	0.154308	-1680
-0.0976553	0.038018	-1680
-0.315686	0.146642	-1680
-0.407884	0.0669728	-1680
-0.0487495	-0.0440027	-1680
-0.00938562	-0.0652081	-1680
-0.0292511	-0.0560569	-1680
-0.0175207	-0.116181	-1680
-0.0793054	-0.186824	-1680
-0.10855	-0.208906	-1680
-0.151774	-0.225588	-1680
-0.17115	-0.248925	-1680
-0.223406	-0.229704	-1680
-0.160969	-0.268883	-1680
0.182044	0.39146	-1620
0.170995	0.375374	-1620
0.313659	0.300214	-1620
0.136919	0.387742	-1620
0.245247	0.329845	-1620
0.316433	0.288334	-1620
0.282391	0.296711	-1620
0.379637	0.246152	-1620
0.172022	0.344755	-1620
0.224925	0.287099	-1620
0.157601	0.320044	-1620
0.161348	0.313194	-1620
0.333553	0.20351	-1620
0.147919	0.277077	-1620
0.256099	0.216125	-1620
0.0926979	0.285305	-1620
0.126605	0.255167	-1620
0.151523	0.218231	-1620
0.0793174	0.247511	-1620
0.297029	0.136059	-1620
0.19316	0.181594	-1620
0.134294	0.145437	-1620
0.338285	0.0228584	-1620
0.221138	0.0629988	-1620
0.141943	0.0882231	-1620
0.0699891	0.127343	-1620
0.215733	0.0455089	-1620
0.104426	0.0996295	-1620
0.0827169	0.0929286	-1620
0.091338	0.061049	-1620
0.0739937	0.0367217	-1620
0.0992113	0.0137723	-1620
0.335158	-0.0834564	-1620
0.165203	-0.146974	-1620
0.0201863	-0.0761638	-1620
0.00953223	-0.11116	-1620
-0.181949	0.191321	-1620
-0.246631	0.199998	-1620
-0.126323	0.103074	-1620
-0.0437788	0.0369167	-1620
-0.0905457	-0.025285	-1620
-0.0828546	-0.0453149	-1620
-0.0300852	-0.0768324	-1620
-0.0924652	-0.0514403	-1620
-0.111205	-0.0465667	-1620
-0.114668	-0.179271	-1620
-0.194435	-0.224573	-1620
-0.21962	-0.277252	-1620
0.198705	0.424189	-1560
0.212874	0.389911	-1560
0.240615	0.354389	-1560
0.257305	0.347804	-1560
0.181129	0.353083	-1560
0.298174	0.301216	-1560
0.20159	0.336125	-1560
0.139697	0.349729	-1560
0.20763	0.319915	-1560
0.252133	0.275509	-1560
0.272097	0.266871	-1560
0.233216	0.249686	-1560
0.0948416	0.295526	-1560
0.14706	0.26253	-1560
0.264016	0.185943	-1560
0.357744	0.14841	-1560
0.283238	0.1753	-1560
0.0970625	0.248349	-1560
0.0918125	0.24166	-1560
0.119691	0.228841	-1560
0.218016	0.184318	-1560
0.204697	0.188346	-1560
0.143876	0.205697	-1560
0.15088	0.199701	-1560
0.255509	0.149575	-1560
0.148485	0.176189	-1560
0.166732	0.163106	-1560
0.332541	0.0854827	-1560
0.120415	0.16042	-1560
0.217621	0.104844	-1560
0.0323861	0.174534	-1560
0.0813484	0.154486	-1560
0.123043	0.115634	-1560
0.0957994	0.120999	-1560
0.296881	0.0321932	-1560
0.0735541	0.116511	-1560
0.170275	0.0715656	-1560
0.114632	0.0903751	-1560
0.0758768	0.102594	-1560
0.268637	0.0178347	-1560
0.175687	0.0561036	-1560
0.105132	0.0338117	-1560
0.114896	0.014849	-1560
0.139967	-0.0278446	-1560
0.0612822	-0.051009	-1560
0.0078421	-0.124667	-1560
0.0419343	-0.209693	-1560
-0.209015	0.234798	-1560
-0.26631	0.142881	-1560
-0.335851	0.160024	-1560
-0.0282793	0.0209639	-1560
-0.100249	-0.0773534	-1560
-0.0628461	-0.107787	-1560
-0.0704839	-0.141429	-1560
-0.207451	-0.106402	-1560
-0.11849	-0.175748	-1560
-0.163946	-0.179201	-1560
-0.122027	-0.234689	-1560
-0.230014	-0.205303	-1560
-0.280342	-0.211641	-1560
-0.257422	-0.333685	-1560
0.241042	0.415704	-1500
0.259278	0.359238	-1500
0.231689	0.36765	-1500
0.173589	0.364516	-1500
0.184021	0.351716	-1500
0.371944	0.248742	-1500
0.141991	0.346389	-1500
0.14945	0.33807	-1500
0.282998	0.247797	-1500
0.219939	0.26831	-1500
0.232407	0.244478	-1500
0.267036	0.22143	-1500
0.154635	0.279361	-1500
0.306861	0.189081	-1500
0.168692	0.246888	-1500
0.203603	0.227222	-1500
0.212209	0.221653	-1500
0.245249	0.197926	-1500
0.285108	0.158914	-1500
0.156665	0.223964	-1500
0.270632	0.149273	-1500
0.149427	0.202895	-1500
0.104066	0.226233	-1500
0.257129	0.140916	-1500
0.271299	0.115638	-1500
0.133849	0.189026	-1500
0.177049	0.131751	-1500
0.18548	0.123629	-1500
0.271356	0.0729799	-1500
0.150021	0.126664	-1500
0.086916	0.158964	-1500
0.307036	0.0419165	-1500
0.140787	0.12926	-1500
0.115064	0.136164	-1500
0.130586	0.121664	-1500
0.103399	0.118487	-1500
0.126741	0.0946921	-1500
0.250903	0.0174415	-1500
0.117575	0.0835054	-1500
0.129297	0.0748093	-1500
0.0738427	0.066515	-1500
0.0354653	0.0562368	-1500
0.346951	-0.0200657	-1500
0.178746	-0.189623	-1500
0.0237434	-0.0899264	-1500
0.00657623	-0.13877	-1500
-0.10404	0.244795	-1500
-0.0666011	0.16486	-1500
-0.132966	0.126049	-1500
-0.2305	0.129548	-1500
-0.316316	0.164052	-1500
-0.428041	0.0473616	-1500
-0.00216408	-0.0808206	-1500
-0.0988721	-0.0879534	-1500
-0.162286	-0.131225	-1500
-0.0736179	-0.199368	-1500
-0.334868	-0.0878743	-1500
-0.174182	-0.199902	-1500
-0.180609	-0.218578	-1500
-0.202623	-0.258112	-1500
-0.200715	-0.300276	-1500
0.324589	0.350243	-1440
0.357406	0.260429	-1440
0.332329	0.273442	-1440
0.302903	0.285097	-1440
0.248896	0.338468	-1440
0.184521	0.389042	-1440
0.394793	0.17702	-1440
0.318856	0.231225	-1440
0.320575	0.202712	-1440
0.300304	0.21626	-1440
0.197823	0.277894	-1440
0.336091	0.139376	-1440
0.130862	0.329063	-1440
0.192875	0.263239	-1440
0.202081	0.244631	-1440
0.320575	0.130816	-1440
0.251474	0.16371	-1440
0.258532	0.146626	-1440
0.111835	0.263429	-1440
0.350844	0.0128697	-1440
0.22513	0.117041	-1440
0.098141	0.223392	-1440
0.253348	0.0727297	-1440
0.228633	0.0761822	-1440
0.28084	0.0207867	-1440
0.0935935	0.170437	-1440
0.196423	0.0690152	-1440
0.1241	0.112077	-1440
0.0899793	0.136495	-1440
0.183928	0.0465617	-1440
0.126544	0.0207748	-1440
0.0863576	0.0404067	-1440
0.0224411	0.0521334	-1440
0.391446	-0.0140575	-1440
0.283284	-0.00440043	-1440
0.269212	-0.0159735	-1440
0.220901	-0.0278343	-1440
0.162065	-0.0296169	-1440
0.157273	-0.0706034	-1440
0.159813	-0.142428	-1440
0.0112354	-0.0763514	-1440
0.209599	-0.179274	-1440
0.317086	-0.250558	-1440
0.148874	-0.173392	-1440
0.104503	-0.150864	-1440
0.418649	-0.328966	-1440
0.38221	-0.327134	-1440
0.21642	-0.308451	-1440
-0.0523094	0.47055	-1440
-0.153807	0.289651	-1440
-0.19382	0.239352	-1440
-0.264674	0.133733	-1440
-0.345217	0.17707	-1440
-0.119472	0.0179435	-1440
-0.335834	-0.0617051	-1440
-0.176177	-0.185552	-1440
-0.154505	-0.201093	-1440
-0.13317	-0.21352	-1440
-0.095947	-0.239588	-1440
-0.196675	-0.188832	-1440
-0.204696	-0.216162	-1440
-0.192751	-0.220059	-1440
-0.282815	-0.214463	-1440
-0.224669	-0.257923	-1440
0.23052	0.401805	-1380
0.210324	0.405118	-1380
0.268738	0.321627	-1380
0.342014	0.250365	-1380
0.221268	0.302398	-1380
0.377607	0.201836	-1380
0.264067	0.267788	-1380
0.185091	0.307728	-1380
0.158481	0.319998	-1380
0.204815	0.276785	-1380
0.260615	0.226355	-1380
0.321576	0.187774	-1380
0.197659	0.253719	-1380
0.107346	0.301033	-1380
0.150617	0.26918	-1380
0.258137	0.201055	-1380
0.211156	0.224705	-1380
0.275359	0.183184	-1380
0.250413	0.190639	-1380
0.205405	0.207696	-1380
0.21694	0.201157	-1380
0.250514	0.177086	-1380
0.224511	0.193267	-1380
0.232622	0.182668	-1380
0.308136	0.132937	-1380
0.167542	0.220801	-1380
0.234528	0.172781	-1380
0.14825	0.225921	-1380
0.389085	0.0541715	-1380
0.0885544	0.241843	-1380
0.171673	0.183564	-1380
0.131409	0.174553	-1380
0.197333	0.131667	-1380
0.137047	0.164192	-1380
0.247546	0.0819363	-1380
0.373295	0.00194876	-1380
0.17961	0.107549	-1380
0.120319	0.128618	-1380
0.147469	0.100989	-1380
0.17843	0.0689128	-1380
0.0881159	0.126602	-1380
0.225793	0.00524197	-1380
0.181825	0.010579	-1380
0.042692	0.0963245	-1380
0.0505166	0.0872733	-1380
0.0367562	0.0837289	-1380
0.0582456	0.0460777	-1380
0.0170768	0.0626116	-1380
0.00260256	0.0530987	-1380
0.29211	-0.0330029	-1380
0.285815	-0.131004	-1380
0.170689	-0.217212	-1380
0.000916235	-0.127412	-1380
0.13042	-0.240604	-1380
-0.164739	0.363805	-1380
-0.0284564	0.0725475	-1380
-0.220321	0.182839	-1380
-0.380933	0.0165015	-1380
-0.014018	-0.0672026	-1380
-0.118609	-0.02148	-1380
-0.0704596	-0.130562	-1380
-0.0983173	-0.125862	-1380
-0.111533	-0.172455	-1380
-0.143002	-0.182832	-1380
-0.131219	-0.199696	-1380
-0.131105	-0.211101	-1380
-0.21199	-0.173706	-1380
-0.194654	-0.261478	-1380
-0.299525	-0.234577	-1380
-0.226123	-0.336013	-1380
0.067101	0.0689107	-1320
0.04247	0.0961068	-1320
0.204205	0.0393336	-1320
0.173216	0.057301	-1320
0.124753	0.084717	-1320
0.0951064	0.10952	-1320
0.144689	0.0967414	-1320
0.0782075	0.127594	-1320
0.109734	0.12182	-1320
0.0835543	0.137733	-1320
0.0538101	0.152667	-1320
0.123791	0.124647	-1320
0.228901	0.0881723	-1320
0.0842553	0.14759	-1320
0.1811	0.111184	-1320
0.141782	0.133361	-1320
0.0748006	0.162995	-1320
0.119917	0.160589	-1320
0.0854615	0.175365	-1320
0.299056	0.0990281	-1320
0.0855485	0.191026	-1320
0.107115	0.18301	-1320
0.124861	0.185994	-1320
0.316003	0.115098	-1320
0.177884	0.19124	-1320
0.077023	0.252568	-1320
0.225793	0.194362	-1320
0.157529	0.223462	-1320
0.206188	0.204979	-1320
0.168516	0.22899	-1320
0.243588	0.213417	-1320
0.203286	0.230806	-1320
0.309711	0.207128	-1320
0.207693	0.251739	-1320
0.1365	0.28545	-1320
0.154714	0.2917	-1320
0.291285	0.24283	-1320
0.327784	0.239325	-1320
0.128035	0.320769	-1320
0.370542	0.22764	-1320
0.126818	0.333597	-1320
0.173064	0.318048	-1320
0.237013	0.300533	-1320
0.35912	0.262262	-1320
0.251179	0.310698	-1320
0.169125	0.34985	-1320
0.223554	-0.258134	-1320
0.208535	-0.171092	-1320
0.0529788	-0.0688664	-1320
0.275299	-0.172367	-1320
0.27819	-0.117276	-1320
0.175721	-0.0281543	-1320
0.319997	-0.0144941	-1320
-0.400689	0.010829	-1320
-0.286388	0.0722631	-1320
-0.027091	0.0198415	-1320
-0.0446814	0.0305695	-1320
-0.0939092	0.0739709	-1320
-0.330735	0.170384	-1320
-0.0586481	0.0984544	-1320
-0.1185	0.164732	-1320
-0.18616	0.256907	-1320
-0.165474	0.266494	-1320
-0.191984	-0.312122	-1320
-0.168724	-0.293721	-1320
-0.132379	-0.248402	-1320
-0.177689	-0.2253	-1320
-0.150298	-0.222786	-1320
-0.113592	-0.223119	-1320
-0.13127	-0.208208	-1320
-0.121248	-0.164507	-1320
-0.287631	-0.108209	-1320
-0.100408	-0.125579	-1320
-0.131403	-0.060042	-1320
-0.0920439	-0.0191819	-1320
0.0192388	0.0202003	-1260
0.0775652	0.0107464	-1260
0.0800469	0.0209499	-1260
0.117383	0.0408724	-1260
0.159254	0.0466236	-1260
0.0658133	0.0860743	-1260
0.257591	0.0143069	-1260
0.147086	0.0611826	-1260
0.281893	0.00425848	-1260
0.226184	0.0409176	-1260
0.109353	0.091063	-1260
0.196324	0.0550307	-1260
0.076903	0.106488	-1260
0.175824	0.0783586	-1260
0.293306	0.032336	-1260
0.0501616	0.154565	-1260
0.140855	0.117758	-1260
0.293603	0.0745137	-1260
0.0704901	0.169376	-1260
0.138624	0.153215	-1260
0.190912	0.134255	-1260
0.177716	0.141396	-1260
0.222023	0.180304	-1260
0.192925	0.189053	-1260
0.213311	0.193027	-1260
0.177784	0.219832	-1260
0.12025	0.254785	-1260
0.0748175	0.278798	-1260
0.344301	0.184291	-1260
0.22793	0.236478	-1260
0.291131	0.215296	-1260
0.105219	0.294281	-1260
0.266095	0.230733	-1260
0.141215	0.295057	-1260
0.285772	0.246701	-1260
0.294463	0.259115	-1260
0.15573	0.317784	-1260
0.275224	0.267302	-1260
0.20769	0.299716	-1260
0.348738	0.243567	-1260
0.162842	0.323561	-1260
0.23804	0.299031	-1260
0.339025	0.279108	-1260
0.268999	0.322255	-1260
0.311173	0.361279	-1260
0.298504	0.377803	-1260
0.0222211	-0.102636	-1260
0.0421324	-0.0794593	-1260
0.0645099	-0.0370887	-1260
0.282315	-0.0817106	-1260
0.365641	-0.028959	-1260
0.378139	-0.0386858	-1260
-0.048531	0.123536	-1260
-0.116922	-0.328293	-1260
-0.183095	-0.287121	-1260
-0.134213	-0.264659	-1260
-0.109619	-0.260016	-1260
-0.114977	-0.218651	-1260
-0.063169	-0.15	-1260
-0.179766	-0.113968	-1260
-0.185761	-0.084832	-1260
-0.0689045	-0.0912715	-1260
-0.00488366	-0.107054	-1260
-0.0397131	-0.0494907	-1260
-0.06776	-0.0249502	-1260
0.0448147	0.00717699	-1200
0.0428581	0.0293699	-1200
0.029024	0.0492558	-1200
0.0617353	0.0501209	-1200
0.0828557	0.0431602	-1200
0.0620329	0.060929	-1200
0.150152	0.023471	-1200
0.208095	0.0137051	-1200
0.151971	0.0501078	-1200
0.0424557	0.111673	-1200
0.144376	0.0793401	-1200
0.0687901	0.117021	-1200
0.0460162	0.133328	-1200
0.248754	0.0417576	-1200
0.0950087	0.115035	-1200
0.290108	0.0650648	-1200
0.119916	0.158156	-1200
0.156694	0.15069	-1200
0.334234	0.0775639	-1200
0.218804	0.146771	-1200
0.268271	0.129376	-1200
0.182753	0.177603	-1200
0.129748	0.203197	-1200
0.240426	0.154656	-1200
0.124	0.225842	-1200
0.140386	0.221595	-1200
0.171752	0.209306	-1200
0.122947	0.23359	-1200
0.246307	0.177688	-1200
0.287986	0.164009	-1200
0.294732	0.177675	-1200
0.261166	0.203708	-1200
0.233724	0.221366	-1200
0.282557	0.199907	-1200
0.201245	0.248186	-1200
0.0939229	0.304652	-1200
0.285952	0.23492	-1200
0.206894	0.277687	-1200
0.330899	0.233439	-1200
0.18439	0.304691	-1200
0.20163	0.303164	-1200
0.248021	0.284228	-1200
0.319716	0.259315	-1200
0.188309	0.32906	-1200
0.235912	0.317708	-1200
0.157912	0.386915	-1200
0.141273	0.401584	-1200
0.202551	0.373112	-1200
0.0217212	-0.249425	-1200
0.0333671	-0.192275	-1200
0.280077	-0.327832	-1200
0.0440817	-0.101788	-1200
0.22845	-0.208309	-1200
0.242829	-0.0969734	-1200
0.400362	-0.124857	-1200
-0.432274	0.0458819	-1200
-0.0835266	0.0208033	-1200
-0.0876605	0.0757601	-1200
-0.276741	0.221113	-1200
-0.304069	0.235069	-1200
-0.229267	0.233038	-1200
-0.181151	0.235577	-1200
-0.119016	0.210916	-1200
-0.22773	-0.280914	-1200
-0.198694	-0.247359	-1200
-0.149954	-0.15849	-1200
-0.0910856	-0.106687	-1200
-0.00131173	-0.109758	-1200
-0.0404184	-0.0737663	-1200
-0.0492428	-0.0563456	-1200
-0.137294	-0.0223555	-1200
-0.103785	-0.0270354	-1200
0.0828741	0.0246942	-1140
0.0851916	0.0474413	-1140
0.112088	0.0586046	-1140
0.183984	0.0372236	-1140
0.228988	0.0366488	-1140
0.145136	0.0831381	-1140
0.120087	0.0951978	-1140
0.280672	0.0410746	-1140
0.15384	0.0944189	-1140
0.049858	0.134047	-1140
0.0858164	0.130604	-1140
0.18062	0.0983069	-1140
0.0158166	0.161826	-1140
0.0501623	0.149562	-1140
0.156195	0.121295	-1140
0.0969446	0.148023	-1140
0.12531	0.150081	-1140
0.151261	0.140599	-1140
0.260434	0.102943	-1140
0.248777	0.107597	-1140
0.134078	0.153778	-1140
0.142755	0.152807	-1140
0.152943	0.159192	-1140
0.144042	0.181915	-1140
0.311146	0.132607	-1140
0.296179	0.149667	-1140
0.120216	0.25062	-1140
0.107667	0.261307	-1140
0.228699	0.219998	-1140
0.235139	0.229548	-1140
0.337392	0.186767	-1140
0.134884	0.267773	-1140
0.0872795	0.31187	-1140
0.223066	0.259558	-1140
0.239416	0.255015	-1140
0.23806	0.279839	-1140
0.282728	0.263477	-1140
0.164659	0.312414	-1140
0.139663	0.324059	-1140
0.106839	0.354972	-1140
0.215339	0.316518	-1140
0.200986	0.328244	-1140
0.234029	0.323775	-1140
0.205717	0.343858	-1140
0.244078	0.352425	-1140
0.23649	0.362754	-1140
5.33983e-06	-0.259688	-1140
0.184432	-0.224365	-1140
0.149462	-0.134288	-1140
0.247837	-0.169811	-1140
0.192458	-0.0929881	-1140
0.261155	-0.0336311	-1140
-0.400988	0.0857154	-1140
-0.0330103	0.020705	-1140
-0.0347178	0.0345475	-1140
-0.303304	0.144411	-1140
-0.212985	0.203427	-1140
-0.267588	-0.333369	-1140
-0.231781	-0.31059	-1140
-0.16288	-0.275758	-1140
-0.154813	-0.260645	-1140
-0.0874325	-0.243543	-1140
-0.140798	-0.187029	-1140
-0.0976649	-0.198026	-1140
-0.136004	-0.173616	-1140
-0.0856734	-0.177223	-1140
-0.0347758	-0.129014	-1140
-0.0464322	-0.118311	-1140
-0.377096	-0.0101989	-1140
-0.0440932	-0.10732	-1140
-0.0604018	-0.0954501	-1140
-0.0884892	-0.0460448	-1140
0.106965	0.027937	-1080
0.0268272	0.0629271	-1080
0.137333	0.0280623	-1080
0.249625	0.00903254	-1080
0.0986219	0.0783551	-1080
0.165518	0.0497792	-1080
0.185275	0.0576592	-1080
0.0941833	0.0986376	-1080
0.109216	0.09917	-1080
0.147267	0.0860848	-1080
0.165423	0.102058	-1080
0.230597	0.0941714	-1080
0.137798	0.140831	-1080
0.272621	0.0832785	-1080
0.154385	0.134849	-1080
0.138474	0.15361	-1080
0.191151	0.135432	-1080
0.0617761	0.228895	-1080
0.24461	0.15651	-1080
0.148467	0.217194	-1080
0.244261	0.192082	-1080
0.1914	0.226609	-1080
0.155674	0.252786	-1080
0.134855	0.261768	-1080
0.0871026	0.291553	-1080
0.0951767	0.287901	-1080
0.137613	0.309706	-1080
0.316717	0.240834	-1080
0.29529	0.25065	-1080
0.118247	0.334649	-1080
0.164778	0.316991	-1080
0.207934	0.302195	-1080
0.139848	0.353879	-1080
0.206882	0.330702	-1080
0.191447	0.352019	-1080
0.298735	-0.300567	-1080
0.019308	-0.0982979	-1080
0.268843	-0.203015	-1080
0.0787908	-0.0317942	-1080
0.219437	-0.0155388	-1080
0.375143	-0.10301	-1080
0.424248	-0.109086	-1080
0.281128	-0.0113375	-1080
-0.0161859	0.0451844	-1080
-0.320518	0.181413	-1080
-0.0406223	0.0816442	-1080
-0.0342738	0.0896774	-1080
-0.17274	0.197317	-1080
-0.200947	0.356464	-1080
-0.156101	-0.27681	-1080
-0.2034	-0.235171	-1080
-0.209473	-0.208443	-1080
-0.133331	-0.195837	-1080
-0.14768	-0.178604	-1080
-0.256352	-0.139039	-1080
-0.135324	-0.159606	-1080
-0.238152	-0.0390145	-1080
-0.041265	-0.0932119	-1080
-0.144231	-0.038902	-1080
-0.00759454	-0.072739	-1080
-0.00497777	-0.0616969	-1080
0.00174987	0.0216151	-1020
0.0539273	0.0305277	-1020
0.0284419	0.0419859	-1020
0.015075	0.0506206	-1020
0.0922729	0.0376465	-1020
0.124888	0.0285949	-1020
0.052658	0.080542	-1020
0.0929519	0.064258	-1020
0.0868875	0.0736254	-1020
0.213698	0.0476013	-1020
0.17073	0.0616177	-1020
0.115873	0.103888	-1020
0.0621334	0.144333	-1020
0.14316	0.117626	-1020
0.17074	0.1104	-1020
0.211974	0.0973755	-1020
0.253945	0.0859363	-1020
0.138689	0.129204	-1020
0.173441	0.1395	-1020
0.245525	0.142968	-1020
0.0863599	0.211142	-1020
0.146644	0.196179	-1020
0.0988493	0.233326	-1020
0.151936	0.213063	-1020
0.241868	0.183779	-1020
0.225451	0.201118	-1020
0.260015	0.204718	-1020
0.303375	0.195717	-1020
0.141233	0.253229	-1020
0.121305	0.26465	-1020
0.083346	0.283378	-1020
0.321203	0.194587	-1020
0.218613	0.240603	-1020
0.296041	0.227868	-1020
0.171816	0.278805	-1020
0.204426	0.279114	-1020
0.23899	0.268098	-1020
0.281515	0.253899	-1020
0.27053	0.269103	-1020
0.0871173	0.336544	-1020
0.192381	0.294672	-1020
0.352157	0.250248	-1020
0.196873	0.327101	-1020
0.221653	0.317708	-1020
0.131256	0.356416	-1020
0.171895	0.348306	-1020
0.112676	0.382137	-1020
0.219836	0.374469	-1020
0.0181986	-0.151524	-1020
0.0084516	-0.139107	-1020
0.186343	-0.106859	-1020
0.0406283	-0.0181585	-1020
0.231975	-0.114094	-1020
0.29274	-0.0988829	-1020
0.283562	-0.0680705	-1020
0.26283	-0.0192138	-1020
-0.336632	0.0676622	-1020
-0.26542	0.117124	-1020
-0.174207	0.183361	-1020
-0.259686	0.246275	-1020
-0.177028	-0.266934	-1020
-0.119682	-0.284098	-1020
-0.212104	-0.245203	-1020
-0.0876952	-0.256938	-1020
-0.15679	-0.233966	-1020
-0.114027	-0.193957	-1020
-0.0447944	-0.205354	-1020
-0.0547027	-0.134403	-1020
-0.193267	-0.0771778	-1020
-0.267997	-0.0539252	-1020
-0.053243	-0.0193734	-1020
0.237391	0.427814	-960
0.274177	0.382672	-960
0.225526	0.391808	-960
0.290508	0.338717	-960
0.203998	0.354954	-960
0.28489	0.294755	-960
0.188666	0.361497	-960
0.142358	0.394013	-960
0.262154	0.28675	-960
0.184841	0.31976	-960
0.231301	0.288933	-960
0.153206	0.330239	-960
0.338625	0.184758	-960
0.197082	0.266627	-960
0.099673	0.331835	-960
0.240233	0.193067	-960
0.142066	0.249076	-960
0.189914	0.203977	-960
0.217784	0.183613	-960
0.206486	0.14016	-960
0.298789	0.0508722	-960
0.298126	0.0383662	-960
0.214048	0.099646	-960
0.313637	0.0149367	-960
0.254739	0.0509712	-960
0.0970101	0.16171	-960
0.140291	0.0805831	-960
0.0799148	0.120949	-960
0.168431	0.0552317	-960
0.124139	0.0717864	-960
0.144335	0.0534088	-960
0.0847631	0.0782443	-960
0.152212	0.00890264	-960
0.0808362	0.0582982	-960
0.280901	-0.0682466	-960
0.0213649	-0.0771685	-960
0.0218312	-0.156227	-960
-0.0631498	0.185215	-960
-0.132502	0.140599	-960
-0.0469817	0.0152415	-960
-0.0830038	-0.0623333	-960
-0.0637184	-0.107669	-960
-0.144396	-0.103109	-960
-0.10325	-0.150468	-960
-0.268447	-0.0805513	-960
-0.195285	-0.15945	-960
-0.2824	-0.106435	-960
-0.175634	-0.179917	-960
-0.195024	-0.19843	-960
-0.178098	-0.223134	-960
-0.220688	-0.280407	-960
[truncated: 2,330 more rows]
