# Supplementary material for: Spinal premotor interneurons controlling antagonistic muscles are spatially intermingled
Source: eLife. 2022 Dec 13;11:e81976. doi: 10.7554/eLife.81976 (PMC9844990; doi:10.7554/eLife.81976)
Supplement: Figure 12—figure supplement 14—source data 1. — The x-y coordinates are normalized (between –0.5 and 0.5) and scaled to an idealized spinal cord of dimensions 1700 μm and 900 μm in the mediolateral and dorsoventral directions respectively, while z coordinates are in micron, with the axis origin taken at the border between L4 and L5 and negative values in the rostral direction. [file elife-81976-fig12-figsupp14-data1.xlsx]

## Sheet: Sheet1
-0.145131	-0.144957	-2580
-0.211234	-0.354945	-2520
-0.293435	-0.281939	-2520
-0.137991	-0.185103	-2520
0.190256	0.153832	-2400
0.228199	-0.012838	-2400
-0.177963	-0.266138	-2400
0.333405	0.0573865	-2340
0.252667	0.045035	-2340
-0.301935	0.05639	-2340
0.235839	0.0741785	-2280
0.28799	0.121923	-2280
0.258777	-0.137882	-2280
0.191374	-0.031748	-2280
0.167915	0.0664263	-2220
0.288642	0.215358	-2220
0.240624	0.116805	-2160
0.210244	0.174075	-2160
0.29257	-0.284151	-2160
0.280903	-0.130856	-2100
-0.152641	-0.211488	-2100
0.137236	0.0712326	-2040
0.233288	0.17625	-2040
0.473005	0.301428	-2040
0.465257	0.324668	-2040
0.168632	0.181695	-2040
0.173004	0.235101	-2040
0.0824351	0.18525	-2040
0.110061	0.218711	-2040
0.0865665	0.267838	-2040
0.389003	-0.0552946	-2040
-0.151339	0.101968	-2040
-0.145559	0.144431	-2040
-0.0936426	0.216528	-2040
0.299033	0.147551	-1980
0.245969	0.193779	-1980
0.320882	-0.0662751	-1980
-0.150799	-0.264022	-1980
-0.212148	-0.223762	-1980
-0.138478	-0.220292	-1980
-0.0307775	-0.133347	-1980
0.368055	-0.172299	-1920
-0.0962188	-0.191132	-1920
-0.432288	-0.336614	-1920
0.279354	0.0756543	-1860
0.340593	0.11718	-1860
0.336347	-0.138668	-1860
-0.283325	0.426555	-1860
0.199446	0.0691688	-1800
0.289353	0.14589	-1800
-0.116883	-0.215031	-1800
0.271789	0.0948324	-1740
0.290462	0.136852	-1740
0.213406	0.128207	-1740
0.334069	-0.120105	-1740
0.348416	-0.110648	-1740
0.35401	-0.0557802	-1740
0.171712	-0.0667415	-1740
0.161669	-0.0187414	-1740
0.275982	0.044135	-1680
0.0589895	0.00881081	-1680
0.199664	0.147608	-1680
0.049203	0.0837207	-1680
0.405362	-0.170934	-1680
0.371822	-0.161797	-1620
0.203072	-0.15834	-1620
-0.076854	-0.271806	-1620
-0.168679	-0.27401	-1620
-0.109707	-0.153461	-1620
0.274988	0.0497309	-1560
0.329154	0.113789	-1560
0.228291	0.0816771	-1560
0.366047	-0.239003	-1560
0.298424	-0.0347501	-1560
0.172747	0.02131	-1500
0.259407	0.0741172	-1500
0.173383	0.04053	-1500
0.254599	0.116256	-1500
0.146608	0.0625398	-1500
0.260821	-0.200321	-1500
0.21133	0.0289391	-1440
0.304814	0.0713077	-1440
0.268349	0.104009	-1440
0.157156	-0.262019	-1440
-0.22288	-0.324235	-1440
0.0485232	0.0207432	-1380
0.327633	0.191859	-1380
0.0894859	0.373038	-1380
-0.375882	0.295448	-1380
-0.141612	-0.288356	-1380
-0.108063	-0.215655	-1380
0.251853	0.0460136	-1320
0.310114	0.155552	-1320
0.0508072	0.130136	-1320
0.293991	-0.242938	-1320
0.359798	-0.0826897	-1320
0.213085	-0.0923152	-1320
0.323454	-0.0295768	-1320
0.0676864	-0.00907162	-1320
-0.114809	-0.299922	-1320
0.278821	0.0617186	-1260
0.329222	0.113016	-1260
0.320456	0.144572	-1260
0.224149	0.137154	-1260
0.163678	0.125017	-1260
-0.0858898	-0.103943	-1260
0.202962	0.0997936	-1200
0.156817	0.0853437	-1200
0.308521	0.162328	-1200
0.11354	0.08064	-1200
0.365499	0.0199251	-1140
0.352936	0.0402335	-1140
0.148807	0.0506512	-1140
0.240104	0.115563	-1140
0.317175	0.168304	-1140
0.313217	-0.100616	-1140
0.326318	-0.0124113	-1140
0.214491	-0.00245532	-1140
0.100863	-0.014618	-1140
-0.12998	-0.227918	-1140
-0.101983	-0.17596	-1140
0.217913	0.0420343	-1080
0.0986635	0.00912113	-1080
0.236397	0.107287	-1080
0.305779	0.165555	-1080
0.224402	0.128833	-1080
0.26987	-0.0878448	-1080
0.0485397	-0.0338019	-1080
0.301999	0.182764	-1020
0.435771	-0.162476	-1020
0.160504	-0.00816273	-1020
-0.22276	-0.25339	-1020
-0.0837971	-0.172686	-1020
0.376884	0.00266066	-960
0.28113	0.0171636	-960
0.169199	0.0258616	-960
0.25352	0.0565123	-960
0.284148	0.105197	-960
0.226006	0.126705	-960
0.213102	0.145359	-960
0.302277	-0.256309	-960
0.354334	-0.173325	-960
0.373769	-0.0812683	-960
0.31503	-0.0876246	-960
0.295127	-0.040655	-960
0.217681	-0.0540332	-960
0.318896	0.00729158	-900
0.273767	0.0438644	-900
0.36006	0.11336	-900
0.261563	0.121034	-900
0.230253	0.164592	-900
0.184174	0.151283	-900
0.185651	0.225521	-900
0.406714	-0.26806	-900
0.34119	-0.00265827	-900
0.252713	-0.017853	-900
0.345926	0.000398293	-840
0.289493	0.0527549	-840
0.283703	0.13174	-840
0.235385	0.107767	-840
0.320358	-0.255295	-840
0.268554	-0.0828064	-840
-0.0502915	-0.19168	-840
0.33698	0.023944	-780
0.234169	0.0512344	-780
0.237273	0.105668	-780
0.130467	0.0505188	-780
0.214538	0.107667	-780
0.289425	0.149697	-780
0.253962	0.134053	-780
0.229681	0.437671	-780
0.222709	-0.268812	-780
0.280484	-0.174602	-780
0.268092	-0.184076	-780
0.235333	-0.0643725	-780
0.180002	-0.0451687	-780
0.136831	-0.0209042	-780
0.114699	-0.0126316	-780
0.320088	0.0264659	-720
0.26243	0.0511833	-720
0.168408	0.0236378	-720
0.246832	0.0958792	-720
0.270665	0.12095	-720
0.125531	0.122498	-720
0.254176	-0.288383	-720
0.289982	-0.239503	-720
0.261878	-0.250506	-720
0.321857	-0.193192	-720
0.275135	-0.189156	-720
0.260102	-0.14604	-720
0.188483	-0.0844936	-720
0.146052	-0.0743872	-720
-0.0795199	-0.170111	-720
0.329536	0.0636541	-660
0.224994	0.0628927	-660
0.248269	0.152177	-660
0.31884	0.212896	-660
0.17472	0.134592	-660
0.220371	0.180872	-660
0.149321	0.142646	-660
0.355854	-0.162435	-660
0.198309	-0.203463	-660
0.255614	-0.12691	-660
0.223112	-0.113608	-660
-0.272003	-0.383726	-660
0.322415	0.094615	-600
0.287616	0.109419	-600
0.291471	0.129862	-600
0.198905	0.0566091	-600
0.258973	0.111871	-600
0.301781	0.155133	-600
0.285342	0.161199	-600
0.235285	0.169116	-600
0.402567	-0.289795	-600
0.132049	-0.0353355	-600
-0.143379	-0.254149	-600
0.278004	0.138994	-540
0.238678	0.118581	-540
0.203077	0.0975961	-540
0.353747	-0.279788	-540
0.200265	-0.301074	-540
0.347784	-0.129805	-540
0.305501	0.161406	-480
0.120233	0.0676309	-480
0.204366	0.132795	-480
0.469065	-0.203259	-480
0.280211	-0.231963	-480
0.239707	-0.26265	-480
0.288453	-0.153098	-480
0.208846	-0.197246	-480
0.27512	-0.0611451	-480
-0.0212065	-0.132132	-480
-0.11477	-0.114164	-480
0.289679	0.0056807	-420
0.354632	0.0373172	-420
0.277467	0.0769901	-420
0.387091	0.0817015	-420
0.399023	0.110252	-420
0.278105	0.161949	-420
0.3697	-0.374576	-420
0.398997	-0.224271	-420
0.378881	-0.160164	-420
0.407531	-0.0123543	-420
0.333765	0.0363822	-360
0.322816	0.0229356	-360
0.177563	0.00656119	-360
0.207985	0.0468629	-360
0.282059	0.16793	-360
0.261246	0.185935	-360
0.193709	-0.331816	-360
0.250663	-0.276377	-360
0.437829	-0.0968566	-360
0.326529	-0.0822562	-360
0.175635	-0.0769206	-360
-0.0853235	-0.223257	-360
0.303405	0.0513818	-300
0.230416	0.0270127	-300
0.143534	0.0148613	-300
0.227255	0.0624286	-300
0.294281	0.112583	-300
0.296461	0.132269	-300
0.271661	0.123715	-300
0.250144	0.125782	-300
0.20895	0.130248	-300
0.127108	0.0981938	-300
0.151003	0.180356	-300
0.355158	-0.346405	-300
0.29012	-0.303051	-300
0.256011	-0.206244	-300
0.349106	-0.0956717	-300
0.210374	-0.0437086	-300
0.247081	0.0610355	-240
0.260722	0.07301	-240
0.409027	-0.242309	-240
0.229477	-0.277976	-240
0.361592	-0.163704	-240
0.293565	-0.17002	-240
0.37069	-0.123458	-240
0.384754	-0.0330101	-240
0.210826	-0.0880331	-240
0.153105	-0.0437751	-240
0.121996	-0.0479455	-240
0.116907	-0.0262576	-240
-0.201341	-0.209344	-240
-0.393706	-0.211046	-240
0.326404	0.0114434	-180
0.174789	0.0224865	-180
0.21839	0.0715551	-180
0.230748	0.0806825	-180
0.248154	0.103782	-180
0.0931388	0.0333254	-180
0.0489168	0.0146192	-180
0.292389	0.136035	-180
0.320402	0.147844	-180
0.0785704	0.0577021	-180
0.343896	0.191174	-180
0.220378	0.158053	-180
0.2738	-0.268459	-180
0.245303	-0.286797	-180
0.358876	-0.109824	-180
0.410526	-0.0578697	-180
0.327863	-0.0640139	-180
0.263488	-0.0324808	-180
0.213015	-0.0247016	-180
0.125022	-0.0408119	-180
0.0507673	-0.00988274	-180
-0.103505	-0.12178	-180
0.267758	0.0547058	-120
0.22025	0.0362497	-120
0.187928	0.0297645	-120
0.112859	0.0182389	-120
0.12384	0.0328278	-120
0.150539	0.0589207	-120
0.275546	0.128237	-120
0.24965	0.166562	-120
0.115224	0.103991	-120
0.123866	0.140067	-120
0.205446	0.194414	-120
0.362911	-0.40419	-120
0.268834	-0.400784	-120
0.260981	-0.388053	-120
0.250531	-0.340507	-120
0.260431	-0.310155	-120
0.336154	-0.255982	-120
0.264804	-0.277446	-120
0.204876	-0.268441	-120
0.315668	-0.213152	-120
0.383941	-0.133304	-120
0.355408	-0.151817	-120
0.275455	-0.167187	-120
0.327226	-0.14291	-120
0.278811	-0.106882	-120
0.203548	-0.0825069	-120
0.337676	-0.0233073	-120
0.172806	-0.041889	-120
0.159538	-0.0289352	-120
-0.133574	-0.270034	-120
-0.113039	-0.0113521	-120
0.131472	0.0238322	-60
0.246652	0.0866245	-60
0.280014	0.134582	-60
0.21774	0.105822	-60
0.226129	0.130073	-60
0.195758	0.127018	-60
0.223517	0.178951	-60
0.284639	-0.38635	-60
0.319181	-0.362557	-60
0.378463	-0.32964	-60
0.407255	-0.295361	-60
0.368921	-0.312272	-60
0.301557	-0.340447	-60
0.39013	-0.237413	-60
0.416537	-0.204471	-60
0.330848	-0.249137	-60
0.330408	-0.223783	-60
0.402517	-0.174922	-60
0.397067	-0.109707	-60
0.259758	-0.0573416	-60
-0.214855	0.0351949	-60
0.157587	0.0158296	0
0.295718	0.103807	0
0.316535	0.143872	0
0.282161	0.124085	0
0.279195	0.167578	0
0.269802	0.167203	0
0.387808	-0.395343	0
0.32525	-0.402865	0
0.376702	-0.377254	0
0.348186	-0.356211	0
0.276825	-0.341884	0
0.413927	-0.271544	0
0.343033	-0.269837	0
0.38858	-0.26001	0
0.303594	-0.287138	0
0.361513	-0.22025	0
0.336126	-0.18518	0
0.278145	-0.208826	0
0.406051	-0.122003	0
0.379783	-0.11468	0
0.267784	-0.134066	0
0.344739	-0.0647331	0
0.161203	-0.0712882	0
-0.219337	0.0748366	0
0.259829	0.113867	60
0.243551	0.120708	60
0.204702	0.113722	60
0.245306	0.14996	60
0.314453	0.181208	60
0.291263	0.19303	60
0.215685	0.15339	60
0.256675	0.204889	60
0.100275	0.135888	60
0.146487	0.15613	60
0.391924	-0.279069	60
0.386812	-0.238521	60
0.300695	-0.289048	60
0.357227	-0.204854	60
0.406148	-0.163361	60
0.308714	-0.168527	60
0.404386	-0.107857	60
0.339325	-0.133889	60
0.259902	-0.0837281	60
0.222123	-0.101595	60
0.271467	0.0440962	120
0.164935	0.00984927	120
0.32263	0.0833292	120
0.210723	0.16542	120
0.427539	-0.468815	120
0.41098	-0.471592	120
0.423284	-0.432187	120
0.453687	-0.419885	120
0.44119	-0.374528	120
0.389026	-0.387108	120
0.446088	-0.339288	120
0.261216	-0.3953	120
0.485465	-0.263274	120
0.384874	-0.294839	120
0.446295	-0.148039	120
0.357082	-0.113124	120
-0.203339	-0.156403	120
0.335734	0.0487324	180
0.310478	0.0385413	180
0.276414	0.0181501	180
0.215413	0.00573647	180
0.223494	0.0926044	180
0.17062	0.12813	180
0.107859	0.132926	180
0.12999	0.191618	180
0.391089	-0.276326	180
0.35815	-0.326302	180
0.377091	-0.257615	180
0.4316	-0.121759	180
0.392863	-0.0331698	180
0.307983	-0.0588881	180
0.267558	-0.11683	180
0.174664	-0.0286849	180
-0.167786	-0.320252	180
0.253431	0.128232	240
0.275605	0.19571	240
0.154462	0.387963	240
0.353182	-0.101263	240
-0.0868838	-0.221033	240
-0.122932	-0.218758	240
0.216929	0.0579148	300
0.0907075	0.0377313	300
0.169703	0.0867283	300
0.199677	0.169989	300
0.277641	-0.40935	300
0.381492	-0.129641	300
0.220267	-0.35948	300
0.198764	-0.079755	300
-0.14468	-0.262336	300
-0.130729	-0.211722	300
0.248428	0.0211334	360
0.169731	0.0764177	360
0.132008	0.0948633	360
0.288859	-0.0741251	360
0.222956	-0.0803698	360
0.241828	0.00684944	420
0.281702	0.0876184	420
0.180468	0.0758882	420
0.130232	0.109319	420
0.207682	0.157873	420
0.316196	-0.220359	420
-0.11854	-0.298283	420
-0.104075	-0.243938	420
-0.0770682	-0.205983	420
0.20461	0.0121251	480
0.0442254	0.0237431	480
0.200398	0.134888	480
0.3011	-0.157323	480
0.40551	-0.0544173	480
0.202979	-0.111936	480
0.13095	0.0106315	540
0.0572339	0.0570186	540
0.177007	0.141154	540
0.195214	0.159908	540
0.350963	-0.212144	540
0.243132	-0.0703183	540
0.159433	0.0010025	600
0.256206	0.0970053	600
0.188436	0.102929	600
0.517515	0.365921	600
0.358338	-0.00654393	600
0.214402	0.0807381	660
0.202045	0.135502	660
0.257541	-0.234109	660
0.293292	-0.115583	660
0.247613	-0.0296104	660
0.145558	0.146762	720
0.255428	0.101217	780
0.162494	0.0779413	780
0.517946	0.416858	780
0.368173	-0.180616	780
-0.177704	-0.27713	780
0.317832	0.0149524	840
0.306611	0.0484151	840
0.309745	0.185573	840
0.278218	0.0700599	900
0.234351	0.136913	900
0.351536	-0.281305	900
0.335807	-0.202162	900
0.244814	0.154197	960
0.171654	0.140289	960
0.38966	-0.241501	960
0.323609	-0.101779	960
0.313677	0.0421325	1020
0.16568	0.129616	1020
0.340692	-0.123097	1080
0.403824	-0.112234	1080
0.34489	-0.0228457	1080
-0.114221	-0.191031	1140
-0.0382701	-0.110373	1140
0.247105	0.129405	1200
0.346491	-0.0417545	1200
0.31422	-0.168601	1320
0.0204599	0.132388	1380
0.178678	0.177905	1380
0.245724	0.235914	1500
0.259749	-0.15946	1560
-0.00832414	0.109553	1560
0.446324	-0.234935	1620
