# Supplementary material for: Spinal premotor interneurons controlling antagonistic muscles are spatially intermingled
Source: eLife. 2022 Dec 13;11:e81976. doi: 10.7554/eLife.81976 (PMC9844990; doi:10.7554/eLife.81976)
Supplement: Figure 12—figure supplement 14—source data 2. [file elife-81976-fig12-figsupp14-data2.xlsx]

## Sheet: Sheet1
0.21709	0.0998215	-2940
0.207615	-0.0194015	-2940
0.386611	-0.359825	-2940
0.199853	-0.0595406	-2880
0.108814	0.0939191	-2820
-0.142834	-0.219246	-2760
0.197825	0.489679	-2640
0.173265	0.480301	-2640
0.0621428	0.0154836	-2640
0.159206	-0.0361659	-2640
0.235856	-0.0548197	-2640
0.253166	-0.102248	-2640
0.312372	0.176655	-2580
0.228885	-0.0751359	-2580
-0.23687	0.326441	-2580
0.328572	0.24561	-2520
0.365509	-0.111489	-2520
-0.106003	-0.182272	-2520
-0.162335	-0.187772	-2520
0.323164	0.101962	-2460
0.372041	0.000548485	-2460
0.202866	-0.0139341	-2460
-0.102155	-0.187265	-2460
0.298835	0.160504	-2400
0.274388	-0.0674095	-2400
0.385868	-0.136371	-2400
0.268135	-0.121834	-2400
0.323152	-0.145258	-2400
0.314413	0.0718728	-2340
0.374059	-0.0414214	-2340
0.264702	-0.122714	-2340
0.318529	-0.25057	-2340
0.32766	0.300163	-2280
0.240212	-0.074197	-2280
0.23417	-0.199722	-2280
0.234895	-0.232092	-2280
-0.137929	-0.151749	-2280
0.211806	0.114937	-2220
0.226157	0.106471	-2220
0.205199	-0.015166	-2220
0.272648	-0.109663	-2220
0.267585	-0.23929	-2220
-0.0854421	-0.180719	-2220
0.241152	0.112936	-2160
-0.0886011	-0.137799	-2160
0.306682	0.190718	-2100
0.32304	-0.0439456	-2100
-0.128275	-0.195728	-2100
-0.200283	-0.236246	-2100
0.216639	0.150564	-2040
0.332078	0.110433	-2040
0.291415	0.0284998	-2040
0.374541	-0.0901723	-2040
0.370682	-0.124776	-2040
0.291052	-0.243703	-2040
-0.160306	-0.181623	-2040
0.215666	0.0802563	-1980
0.121374	0.0739098	-1980
0.39577	-0.13332	-1980
0.385273	-0.17703	-1980
-0.123681	-0.144223	-1980
-0.161362	-0.193569	-1980
-0.126015	-0.220495	-1980
-0.0902193	-0.241619	-1980
0.143782	0.134258	-1920
0.404489	0.0875076	-1920
0.259266	0.0429818	-1920
0.306065	0.0279421	-1920
0.2198	-0.0215698	-1920
0.27478	-0.0679955	-1920
0.389023	-0.116477	-1920
0.3237	-0.190322	-1920
-0.127689	-0.174885	-1920
-0.138557	-0.227129	-1920
-0.0974429	-0.236079	-1920
-0.207183	-0.237453	-1920
-0.101185	-0.268737	-1920
0.28185	0.112324	-1860
0.301092	0.0935275	-1860
0.318623	0.0356209	-1860
0.222064	0.0570115	-1860
0.253469	0.0165735	-1860
0.34965	-0.0582689	-1860
0.362362	-0.16278	-1860
0.191847	-0.144891	-1860
0.392513	-0.250857	-1860
0.339947	-0.26686	-1860
-0.074587	-0.129899	-1860
-0.145141	-0.187181	-1860
-0.125315	-0.208047	-1860
-0.14775	-0.270152	-1860
0.316071	0.158702	-1800
0.358732	0.117508	-1800
0.0680898	0.0257511	-1800
0.0828209	0.00667063	-1800
0.397486	-0.150585	-1800
0.354975	-0.266362	-1800
0.23981	-0.326571	-1800
-0.123477	-0.285778	-1800
0.332428	0.18004	-1740
0.0632275	0.0139734	-1740
0.36982	-0.072975	-1740
0.181556	-0.0566079	-1740
0.327769	-0.19996	-1740
0.307965	-0.234114	-1740
-0.166461	-0.154241	-1740
-0.198639	-0.154964	-1740
-0.0769219	-0.262006	-1740
0.0315728	0.293164	-1680
0.31949	0.195545	-1680
0.2675	0.174482	-1680
0.208063	0.124418	-1680
0.24129	0.105324	-1680
0.375574	0.0424136	-1680
0.49413	-0.028733	-1680
0.403188	-0.0086032	-1680
0.501085	-0.0961864	-1680
0.413298	-0.145288	-1680
0.490717	-0.185941	-1680
0.266696	-0.132246	-1680
0.485727	-0.216428	-1680
0.472432	-0.26417	-1680
0.431439	-0.368792	-1680
-0.0959448	-0.282675	-1680
-0.141429	-0.28199	-1680
0.286767	0.248696	-1620
0.33841	0.237161	-1620
0.193731	0.211847	-1620
0.3661	-0.047257	-1620
0.241203	-0.0162477	-1620
0.345909	-0.232141	-1620
-0.173042	-0.284818	-1620
0.346791	0.171955	-1560
0.196222	0.163925	-1560
0.175762	0.098704	-1560
0.36913	0.0302382	-1560
0.118112	0.0743511	-1560
0.395747	-0.0367435	-1560
0.17356	-0.04614	-1560
-0.19811	-0.0287947	-1560
-0.132751	-0.196418	-1560
-0.158343	-0.228748	-1560
-0.121629	-0.270828	-1560
-0.188482	-0.343788	-1560
0.270204	0.00114293	-1500
0.359055	-0.24423	-1500
0.317801	-0.297969	-1500
-0.074746	-0.180081	-1500
-0.169293	-0.220816	-1500
-0.133375	-0.229518	-1500
-0.0799942	-0.267218	-1500
0.413043	-0.218713	-1440
0.320911	-0.224201	-1440
-0.0601394	-0.161744	-1440
-0.263974	-0.301272	-1440
0.319519	0.392592	-1380
0.0337033	0.324395	-1380
0.0471366	0.0130197	-1380
0.365347	-0.0215009	-1380
0.251124	-0.156083	-1380
-0.0832223	-0.217748	-1380
-0.0814643	-0.280443	-1380
-0.12519	-0.297835	-1380
0.0790202	-0.00278064	-1320
0.224899	-0.065973	-1320
0.453199	-0.289355	-1320
0.409849	-0.288245	-1320
0.415166	-0.322095	-1320
0.360043	-0.364343	-1320
0.176002	0.364856	-1260
0.0276398	0.287198	-1260
0.0880225	0.112379	-1260
0.211846	0.0159897	-1260
0.318634	-0.0568871	-1260
0.244909	-0.083445	-1260
0.263462	-0.195879	-1260
-0.0579613	-0.138493	-1260
-0.134781	-0.22435	-1260
-0.09993	-0.252564	-1260
0.3218	0.00836882	-1200
0.392917	-0.0677229	-1200
0.244935	-0.0757667	-1200
0.300133	-0.0975236	-1200
0.329399	-0.111548	-1200
0.20037	-0.155516	-1200
0.214234	-0.152288	-1200
0.43055	-0.22436	-1200
0.277555	-0.216305	-1200
0.232663	-0.314583	-1200
-0.127932	-0.242239	-1200
0.147853	0.235352	-1140
0.192125	0.148773	-1140
0.301245	0.00414017	-1140
0.355043	-0.000292557	-1140
0.310574	-0.0533602	-1140
0.340659	-0.0635057	-1140
0.329765	-0.095363	-1140
0.250451	-0.13258	-1140
0.312237	-0.214642	-1140
0.246324	-0.236135	-1140
0.350053	0.0786292	-1080
0.133585	0.057904	-1080
0.272973	0.0325294	-1080
0.35667	0.0142275	-1080
0.35132	-0.0153148	-1080
0.341251	-0.0539336	-1080
0.367406	-0.0669137	-1080
0.0546197	-0.013205	-1080
0.25052	-0.0557543	-1080
0.248579	-0.10806	-1080
0.047961	-0.160837	-1080
0.0513495	-0.1728	-1080
0.0600469	-0.189132	-1080
0.250562	-0.303832	-1080
0.179626	-0.307345	-1080
0.116824	0.230842	-1020
0.172115	0.185041	-1020
0.181527	0.17962	-1020
0.215601	0.137921	-1020
0.201101	0.120152	-1020
0.29254	0.0258278	-1020
0.154727	0.00902059	-1020
0.0560269	0.00682501	-1020
0.169793	-0.000179474	-1020
0.331725	-0.042905	-1020
0.377717	-0.0712302	-1020
0.296242	-0.0540746	-1020
0.205928	-0.0406774	-1020
0.19217	-0.295658	-1020
0.264106	-0.323624	-1020
0.116594	0.121012	-960
0.350747	0.00526755	-960
0.387738	-0.0581448	-960
0.245775	-0.0592465	-960
0.383193	-0.158663	-960
0.25583	-0.180824	-960
0.274577	-0.325525	-960
0.257264	-0.348463	-960
-0.191994	0.141948	-960
0.251787	0.162165	-900
0.0305987	0.12843	-900
0.141815	0.104915	-900
0.339103	0.0505086	-900
0.351632	0.0337253	-900
0.252043	0.0193475	-900
0.19849	0.0130724	-900
0.362683	-0.0280525	-900
0.25611	-0.0415963	-900
0.225263	-0.0411742	-900
0.274933	-0.106964	-900
0.344784	-0.204858	-900
0.390281	-0.240388	-900
0.418447	-0.263315	-900
0.239584	-0.364646	-900
0.166352	0.199157	-780
0.12784	0.198722	-780
0.222346	0.117342	-780
0.204223	0.104459	-780
0.165948	0.0879086	-780
0.310503	0.0681502	-780
0.251239	0.039169	-780
0.148096	0.0380389	-780
0.149393	0.0128216	-780
0.190811	0.00166898	-780
0.218889	-0.0650884	-780
0.336677	-0.188257	-780
0.405148	-0.212856	-780
0.263417	-0.303729	-780
0.350967	0.143192	-720
0.242308	0.131802	-720
0.276622	0.0888999	-720
0.337667	0.070946	-720
0.236022	0.0794883	-720
0.0526469	0.126698	-720
0.130248	0.0950493	-720
0.252899	0.0638395	-720
0.358491	0.0172759	-720
0.236416	0.0352377	-720
0.140205	0.0298779	-720
0.154437	0.00889318	-720
0.399994	-0.0748051	-720
0.380153	-0.0988022	-720
0.269717	-0.0813543	-720
0.389564	-0.14116	-720
0.374873	-0.136653	-720
0.149419	-0.0836287	-720
0.301707	-0.15049	-720
0.161787	-0.0983706	-720
0.200893	-0.126742	-720
0.412814	-0.195396	-720
0.181445	-0.131332	-720
0.257546	-0.191603	-720
0.34227	-0.277357	-720
0.0998404	0.238493	-660
0.312179	0.182648	-660
0.296489	0.141168	-660
0.205392	0.124316	-660
0.340369	0.0753932	-660
0.315537	0.0746461	-660
0.266465	0.0782966	-660
0.204627	0.091688	-660
0.102043	0.107425	-660
0.250298	0.0556937	-660
0.0694991	0.0821267	-660
0.205602	0.048998	-660
0.161751	0.0304523	-660
0.209963	-0.00468673	-660
0.286835	-0.0582917	-660
0.15045	-0.066046	-660
0.281643	-0.0881033	-660
0.258782	-0.123519	-660
0.20454	-0.117303	-660
0.350153	-0.158224	-660
0.356384	-0.217155	-660
0.161	0.217786	-600
0.303503	0.125915	-600
0.270559	0.120869	-600
0.22917	0.112517	-600
0.257233	0.114005	-600
0.250317	0.0790255	-600
0.213201	0.0686136	-600
0.191062	0.0505799	-600
0.124173	0.0599667	-600
0.176773	0.00865581	-600
0.111536	0.0257891	-600
0.32788	-0.00755203	-600
0.339685	-0.0400761	-600
0.19511	-0.0463695	-600
0.216214	-0.0761648	-600
0.391089	-0.119131	-600
0.365264	-0.122846	-600
0.241612	-0.145059	-600
0.404791	-0.238151	-600
0.232081	-0.291448	-600
0.275947	-0.350968	-600
0.220211	0.22782	-480
0.244216	0.212951	-480
0.283146	0.146557	-480
0.236656	0.125445	-480
0.168527	0.127194	-480
0.214216	0.101518	-480
0.304223	0.0831594	-480
0.393281	0.0636317	-480
0.329116	0.0723434	-480
0.136785	0.0892039	-480
0.219285	0.074924	-480
0.207301	0.0663855	-480
0.337068	0.0276765	-480
0.378993	-0.026697	-480
0.223969	-0.0119781	-480
0.291698	-0.0367173	-480
0.35524	-0.118428	-480
0.253754	-0.111745	-480
0.344983	-0.143728	-480
0.414484	-0.229167	-480
0.0600738	-0.267068	-480
0.27177	-0.319377	-480
0.224295	-0.317428	-480
0.128808	0.220622	-420
0.29451	0.138391	-420
0.320385	0.130796	-420
0.279617	0.123452	-420
0.248376	0.104416	-420
0.296967	0.0710333	-420
0.235834	0.0733621	-420
0.137747	0.091376	-420
0.322246	0.0397523	-420
0.338737	0.0157906	-420
0.238917	0.0131291	-420
0.164873	0.0238563	-420
0.353834	-0.00451377	-420
0.375827	-0.0216523	-420
0.182419	-0.00612213	-420
0.158798	-0.0300832	-420
0.134348	-0.0545371	-420
0.185117	-0.127985	-420
0.331751	-0.161778	-420
0.114608	-0.128029	-420
0.180995	0.299666	-300
0.327384	0.205523	-300
0.266263	0.153712	-300
0.218769	0.123563	-300
0.241238	0.123607	-300
0.352024	0.082618	-300
0.20164	0.107977	-300
0.240991	0.0957687	-300
0.353971	0.0706936	-300
0.235898	0.0493594	-300
0.20443	0.0433349	-300
0.187308	0.0194416	-300
0.127226	0.0020348	-300
0.291165	-0.0659918	-300
0.36948	-0.0994991	-300
0.331256	-0.0948089	-300
0.31996	-0.125595	-300
0.294419	-0.144134	-300
0.238935	-0.142541	-300
0.187228	-0.134087	-300
0.275532	-0.170673	-300
0.44683	-0.233615	-300
0.201735	-0.226619	-300
0.230603	-0.242002	-300
0.246054	-0.314189	-300
0.195647	-0.328723	-300
0.287832	0.186447	-180
0.305838	0.152487	-180
0.355776	0.084525	-180
0.347569	0.0675537	-180
0.277587	0.0862434	-180
0.256761	0.0854353	-180
0.313342	0.0616158	-180
0.370052	-0.0140754	-180
0.323292	-0.0118021	-180
0.342533	-0.0292449	-180
0.317862	-0.0485043	-180
0.117222	-0.0204491	-180
0.237291	-0.0663296	-180
0.311778	-0.0864919	-180
0.382972	-0.129249	-180
0.278484	-0.148912	-180
0.173343	-0.139097	-180
0.30124	-0.240099	-180
0.252364	-0.244986	-180
0.23176	-0.31241	-180
0.209651	0.224871	0
0.308149	0.202068	0
0.273702	0.104106	0
0.302691	0.0876599	0
0.314686	0.0626664	0
0.408167	-0.0304317	0
0.278666	-0.0354986	0
0.306047	-0.0962708	0
0.259917	-0.167106	0
0.418494	-0.197092	0
0.209732	-0.196352	0
0.265138	-0.225456	0
0.312882	-0.241538	0
0.263986	-0.262252	0
0.226148	-0.269477	0
0.267532	-0.306151	0
0.240822	-0.316214	0
0.25081	-0.378425	0
0.184804	0.180414	120
0.0974805	0.181241	120
0.294017	0.137577	120
0.278979	0.137163	120
0.172184	0.14842	120
0.230306	0.127171	120
0.1901	0.123251	120
0.243721	0.104971	120
0.367412	0.0857899	120
0.226613	0.108544	120
0.149967	0.120447	120
0.227087	0.0738544	120
0.314177	0.0425724	120
0.213765	0.0572374	120
0.335172	0.027775	120
0.116231	0.0555335	120
0.304188	0.0223325	120
0.180203	0.0345161	120
0.139109	0.0278825	120
0.292548	0.0106617	120
0.184364	0.00116625	120
0.210981	-0.0141821	120
0.445253	-0.0616421	120
0.299774	-0.0522026	120
0.262766	-0.0789594	120
0.225411	-0.0718797	120
0.433287	-0.133887	120
0.23066	-0.0921041	120
0.213839	-0.0923891	120
0.26527	-0.13595	120
0.199061	-0.115167	120
0.205392	-0.135391	120
0.424279	-0.218512	120
0.0563194	-0.153769	120
0.348961	-0.217668	120
0.368534	-0.259953	120
0.334063	-0.271627	120
0.225291	-0.26783	120
0.277858	-0.279732	120
0.20047	-0.318015	120
0.262866	-0.321332	120
0.180457	-0.326474	120
-0.627667	0.152368	120
0.330005	0.230032	180
0.277875	0.202071	180
0.294844	0.183817	180
0.179833	0.14373	180
0.138069	0.149563	180
0.166663	0.142611	180
0.233432	0.118024	180
0.236412	0.0948333	180
0.302669	0.0723016	180
0.32598	0.0257063	180
0.312681	-0.0368966	180
0.142443	-0.0078513	180
0.272271	-0.0487854	180
0.231061	-0.117098	180
0.302641	-0.149018	180
0.372998	-0.208507	180
0.380632	-0.252718	180
0.404415	-0.24452	180
0.347104	-0.255134	180
0.334645	-0.261609	180
0.208331	-0.22563	180
0.306783	-0.282658	180
0.294222	-0.345435	180
0.222086	0.282679	240
0.289085	0.188217	240
0.169514	0.197481	240
0.315219	0.174322	240
0.291706	0.119599	240
0.0916325	0.107843	240
0.153554	0.0949909	240
0.278569	0.0835361	240
0.14452	0.0778161	240
0.136727	0.0701992	240
0.225555	0.0539728	240
0.145628	0.0510098	240
0.37966	0.0268136	240
0.131897	0.029306	240
0.164564	0.0201304	240
0.276854	0.0102711	240
0.155036	-0.00604798	240
0.184056	-0.00895953	240
0.293947	-0.063995	240
0.262546	-0.105266	240
0.374602	-0.209904	240
0.350849	-0.22	240
0.303697	-0.251672	240
0.376818	-0.260915	240
0.322733	-0.279994	240
0.334876	-0.387852	240
0.285521	-0.386455	240
0.14047	0.303998	300
0.332483	0.205472	300
0.296778	0.165086	300
0.132343	0.190262	300
0.188029	0.173668	300
0.173612	0.157869	300
0.195725	0.146949	300
0.244996	0.108963	300
0.227778	0.107027	300
0.174622	0.105716	300
0.319017	0.0462116	300
0.302655	0.0448199	300
0.125915	0.0816465	300
0.350897	0.0266208	300
0.20866	0.0531255	300
0.31994	0.0182795	300
0.164329	0.0465328	300
0.175472	0.0349799	300
0.184808	0.0267635	300
0.107826	0.0398598	300
0.183228	0.00641432	300
0.16907	0.00053527	300
0.310271	-0.0149163	300
0.32565	-0.0444781	300
0.282534	-0.0426475	300
0.304501	-0.0569897	300
0.100124	-0.012674	300
0.11185	-0.00825435	300
0.296373	-0.106158	300
0.36538	-0.172843	300
0.298106	-0.150431	300
0.456187	-0.193457	300
0.235932	-0.159227	300
0.217306	-0.206998	300
0.314787	-0.236679	300
0.244904	-0.234751	300
0.249432	-0.252018	300
0.269699	-0.26194	300
0.180791	-0.346368	300
0.318167	-0.394757	300
0.300348	0.242061	360
0.266589	0.219088	360
0.279877	0.203729	360
0.105454	0.193175	360
0.223966	0.162443	360
0.249284	0.161276	360
0.26696	0.154911	360
0.203585	0.149592	360
0.20872	0.118185	360
0.315766	0.105252	360
0.289994	0.10216	360
0.249322	0.0725797	360
0.316694	0.0712538	360
0.19114	0.0718296	360
0.173138	0.0583426	360
0.274295	0.0547208	360
0.0046044	0.0689655	360
0.252117	0.0501898	360
0.222374	0.0557286	360
0.313924	0.0398624	360
0.146554	0.0405974	360
0.0651523	0.0345888	360
0.159312	0.0269361	360
0.0532129	0.0165178	360
0.0793173	0.00773608	360
0.174635	-0.00213526	360
0.298832	-0.0128228	360
0.125662	-0.00536063	360
0.386086	-0.0878829	360
0.186216	-0.0754197	360
0.375412	-0.109505	360
0.301582	-0.131465	360
0.366095	-0.1365	360
0.240868	-0.138421	360
0.229645	-0.141523	360
0.314065	-0.24306	360
0.362693	-0.262255	360
0.243356	-0.311917	360
0.266736	-0.343912	360
-0.437799	0.245592	360
0.257862	0.224408	420
0.280848	0.212468	420
0.185729	0.210144	420
0.102205	0.177121	420
0.237832	0.170532	420
0.199497	0.173483	420
0.272775	0.148311	420
0.286871	0.135813	420
0.246921	0.133955	420
0.278661	0.114875	420
0.142018	0.120379	420
0.191588	0.111596	420
0.206044	0.10399	420
0.160774	0.101728	420
0.0928916	0.107522	420
0.223376	0.0935866	420
0.333967	0.0687586	420
0.0631676	0.0934184	420
0.346291	0.0572695	420
0.157108	0.0723437	420
0.249925	0.0636753	420
0.325356	0.0522703	420
0.136364	0.0650589	420
0.343498	0.0450543	420
0.180224	0.0472481	420
0.15828	0.0521098	420
0.309584	0.0257224	420
0.227777	0.0180477	420
0.226632	-0.0287402	420
0.168636	-0.0199336	420
0.292402	-0.0432321	420
0.237158	-0.0436034	420
0.41091	-0.119242	420
0.285549	-0.0950154	420
0.290454	-0.13175	420
0.310947	-0.151776	420
0.283069	-0.18206	420
0.371744	-0.218829	420
0.343205	-0.249402	420
0.423091	-0.260193	420
0.240973	-0.233541	420
0.243978	-0.270079	420
0.182257	0.202866	480
0.264681	0.18083	480
0.288285	0.155013	480
0.33689	0.142687	480
0.0926198	0.166673	480
0.123152	0.128245	480
0.335168	0.0803443	480
0.117295	0.103974	480
0.156267	0.0897691	480
0.342645	0.0312468	480
0.147054	0.0706501	480
0.120291	0.0701665	480
0.137123	0.0646655	480
0.356359	0.0150289	480
0.0940976	0.052506	480
0.330518	0.0025286	480
0.162395	0.0146405	480
0.0523194	0.0144978	480
0.207305	-0.00216996	480
0.187178	-0.0187405	480
0.235119	-0.0369879	480
0.272721	-0.0528023	480
0.24989	-0.053701	480
0.179586	-0.0351139	480
0.356372	-0.105122	480
0.258743	-0.0983934	480
0.261922	-0.133474	480
0.337283	-0.229216	480
0.27085	-0.23875	480
0.176081	-0.216875	480
0.23156	-0.238849	480
0.287289	-0.263255	480
0.390423	-0.366372	480
0.207183	-0.406418	480
0.279785	0.211306	540
0.26835	0.194408	540
0.279729	0.189176	540
0.26752	0.159832	540
0.245683	0.12459	540
0.125229	0.138206	540
0.36615	0.101281	540
0.343621	0.0961484	540
0.324428	0.0825932	540
0.232816	0.0730388	540
0.208577	0.077621	540
0.0376802	0.0956512	540
0.19054	0.079847	540
0.267541	0.0511838	540
0.380062	0.0319296	540
0.106971	0.0510614	540
0.246119	0.0224441	540
0.267464	-0.028823	540
0.266973	-0.0684513	540
0.2458	-0.0871929	540
0.271334	-0.0984325	540
0.392348	-0.137232	540
0.394646	-0.190627	540
0.366662	-0.191956	540
0.0682798	-0.132151	540
0.360966	-0.285216	540
0.190159	-0.251616	540
0.267478	-0.28186	540
0.239274	-0.332623	540
-7.77147e-05	-0.056067	540
-0.120824	-0.0898205	540
-0.253295	-0.240049	540
0.128664	0.275097	660
0.115065	0.2448	660
0.229969	0.21507	660
0.319656	0.173331	660
0.131662	0.157005	660
0.302115	0.0947604	660
0.148267	0.102247	660
0.274689	0.0656637	660
0.215661	0.0685301	660
0.153212	0.0407385	660
0.232265	0.00631736	660
0.439171	-0.0151446	660
0.323357	-0.0216661	660
0.222052	-0.0714234	660
0.38624	-0.166578	660
0.354303	-0.14025	660
0.310822	-0.185153	660
0.265614	-0.168003	660
0.415232	-0.209403	660
0.393328	-0.223111	660
0.416096	-0.242712	660
0.227861	-0.23962	660
0.202048	-0.28672	660
0.416678	-0.341055	660
0.119449	-0.276708	660
0.324816	-0.322698	660
0.305675	-0.324364	660
0.268652	-0.333676	660
0.267113	-0.359496	660
0.246861	-0.379085	660
-0.179385	-0.145701	660
-0.213831	-0.171081	660
-0.229812	-0.183036	660
-0.258804	-0.259767	660
0.288384	0.145525	720
0.310626	0.135848	720
0.19507	0.106799	720
0.102178	0.0934045	720
0.207084	0.0315807	720
0.199855	0.0171958	720
0.318797	-0.0964311	720
0.290905	-0.157786	720
0.34119	-0.186053	720
0.399585	-0.216258	720
0.382488	-0.211645	720
0.301672	-0.376118	720
0.369054	-0.406483	720
0.247447	-0.40306	720
0.274195	0.174303	780
0.231237	0.180685	780
0.225608	0.171079	780
0.128674	0.162354	780
0.246083	0.120282	780
0.191387	0.13342	780
0.276421	0.108183	780
0.295782	0.103979	780
0.0765155	0.150106	780
0.266444	0.0984361	780
0.21201	0.106015	780
0.273117	0.0889631	780
0.347969	0.0667182	780
0.162965	0.100705	780
0.130069	0.0843014	780
0.194516	0.0510296	780
0.239643	0.0462681	780
0.14545	0.053323	780
0.183489	0.0426534	780
0.33695	0.00149574	780
0.147423	0.0326486	780
0.165917	0.0143175	780
0.0478187	0.0133453	780
0.194812	-0.00176027	780
0.273244	-0.0493116	780
0.2474	-0.0512165	780
0.237931	-0.0529888	780
0.279218	-0.0820573	780
0.321119	-0.115985	780
0.310945	-0.135336	780
0.364801	-0.194702	780
0.198088	-0.333269	780
0.182003	-0.364351	780
-0.239302	-0.265903	780
-0.213358	-0.277262	780
0.247162	0.147801	840
0.317401	0.0920253	840
0.26725	0.101973	840
0.24853	0.108533	840
0.278713	0.0766569	840
0.357457	0.0104817	840
0.195698	0.121058	840
0.330655	0.0296896	840
0.187909	0.112814	840
0.243455	0.0665346	840
0.116198	0.119651	840
0.217734	0.0316914	840
0.218212	0.0147524	840
0.355667	-0.0218578	840
0.222492	-0.0234235	840
0.462144	-0.188042	840
0.278873	-0.108307	840
0.286924	-0.13794	840
0.247265	-0.140718	840
0.126071	-0.117489	840
0.377139	-0.300976	840
0.207368	-0.193208	840
0.222134	-0.352201	840
0.296343	-0.411883	840
0.203104	-0.362241	840
0.169763	-0.360799	840
0.183414	-0.383091	840
0.133629	-0.355642	840
-0.15687	-0.187407	840
-0.15171	-0.239699	840
0.275241	0.155514	900
0.185539	0.165399	900
0.227544	0.148981	900
0.203898	0.148826	900
0.210395	0.120904	900
0.138755	0.120086	900
0.209518	0.0950255	900
0.190201	0.0804716	900
0.179448	0.0715103	900
0.136225	0.0743312	900
0.204688	0.0541847	900
0.175859	0.0427459	900
0.153779	0.0300971	900
0.35395	-0.0230201	900
0.334438	-0.0804163	900
0.296979	-0.084961	900
0.331226	-0.12616	900
0.207741	-0.0691198	900
0.397369	-0.245568	900
0.217827	-0.150201	900
0.417165	-0.264245	900
0.253546	-0.249757	900
0.318058	-0.294693	900
0.221953	-0.269454	900
0.234135	-0.286933	900
0.220365	-0.345029	900
0.203101	-0.355768	900
0.159	-0.362864	900
-0.0504071	0.0690896	900
-0.144101	0.0327385	900
-0.0813999	-0.21222	900
-0.182182	-0.217266	900
0.289378	0.177817	960
0.241084	0.181627	960
0.249839	0.176894	960
0.238584	0.153016	960
0.17721	0.126885	960
0.187095	0.105547	960
0.159679	0.104641	960
0.13862	0.096199	960
0.195443	0.0696026	960
0.153469	0.0578074	960
0.345709	0.00414906	960
0.226004	0.0321595	960
0.235809	0.0211263	960
0.0177261	0.0736077	960
0.0134069	0.0245472	960
0.279464	-0.000998602	960
0.273544	-0.0540119	960
0.247686	-0.110071	960
0.265014	-0.176678	960
0.342281	-0.232113	960
0.181022	-0.179748	960
0.284986	-0.249139	960
0.379537	-0.386459	960
0.242592	-0.374363	960
0.208872	-0.371917	960
-0.113665	-0.248643	960
-0.187521	-0.329711	960
0.210457	0.155154	1020
0.239988	0.135407	1020
0.304143	0.0985644	1020
0.122863	0.09559	1020
0.167178	0.0602884	1020
0.190885	0.0499071	1020
0.235246	0.0173717	1020
0.0201473	0.019313	1020
0.286267	-0.0111389	1020
0.370853	-0.0587662	1020
0.386865	-0.058991	1020
0.217853	-0.0193432	1020
0.244269	-0.0370005	1020
0.282714	-0.0574426	1020
0.348021	-0.100924	1020
0.225518	-0.0524226	1020
0.294499	-0.083991	1020
0.312652	-0.105919	1020
0.130344	-0.0275225	1020
0.204028	-0.0850774	1020
0.410994	-0.236089	1020
0.205877	-0.126111	1020
0.280513	-0.190634	1020
0.374927	-0.275549	1020
0.230006	-0.245692	1020
0.348136	-0.353172	1020
0.252693	-0.39965	1020
-0.0901764	-0.190925	1020
0.220807	0.115235	1080
0.205767	0.120873	1080
0.261233	0.0984043	1080
0.196627	0.107757	1080
0.21719	-0.00296526	1080
0.244784	-0.0169209	1080
0.295246	-0.0295769	1080
0.200169	-0.0173373	1080
0.219504	-0.0726552	1080
0.287402	-0.144263	1080
0.316337	-0.168339	1080
0.401664	-0.212073	1080
0.245703	-0.166042	1080
0.300212	-0.187745	1080
0.378463	-0.312198	1080
0.358292	-0.362153	1080
0.260012	-0.398178	1080
-0.170429	-0.133931	1080
-0.216098	-0.156225	1080
0.208046	0.173333	1140
0.234617	0.152555	1140
0.184181	0.140851	1140
0.245625	0.115914	1140
0.187183	0.115895	1140
0.24998	0.0802912	1140
0.164855	0.0779795	1140
0.23898	0.0146257	1140
0.220078	0.0105392	1140
0.0451045	0.0212423	1140
0.377856	-0.00516289	1140
0.300128	-0.0017343	1140
0.250572	-0.0882761	1140
0.386014	-0.220844	1140
0.262173	-0.181502	1140
0.2334	-0.234878	1140
0.346217	-0.278876	1140
0.344832	-0.360002	1140
0.301977	-0.366899	1140
0.214322	-0.385509	1140
-0.188947	-0.224745	1140
-0.201828	-0.229226	1140
0.275392	0.279633	1200
0.212586	0.189498	1200
0.124796	0.201858	1200
0.266368	0.150626	1200
0.206172	0.110265	1200
0.0293424	0.125177	1200
0.175019	0.0747761	1200
0.172772	0.00461969	1200
0.305391	-0.0559878	1200
0.21488	-0.0628524	1200
0.282376	-0.0866592	1200
0.328817	-0.0948141	1200
0.39636	-0.14306	1200
0.374057	-0.215603	1200
0.223105	-0.213667	1200
0.30891	-0.320133	1200
0.321826	-0.361876	1200
0.219459	-0.396495	1200
0.195954	-0.419567	1200
-0.0781082	0.00774328	1200
-0.165201	0.0114416	1200
-0.0778374	-0.108332	1200
-0.0870576	-0.125171	1200
-0.154182	-0.179265	1200
-0.126778	-0.210308	1200
-0.0890433	-0.225108	1200
-0.111115	-0.235156	1200
-0.213537	-0.215011	1200
0.269859	0.219798	1260
0.303424	0.205494	1260
0.211687	0.165754	1260
0.197395	0.120754	1260
0.320463	0.0902704	1260
0.253189	0.0889971	1260
0.303552	0.0542384	1260
0.245887	0.0357531	1260
0.332867	0.0157622	1260
0.375285	0.000278813	1260
0.373936	-0.131204	1260
0.382861	-0.231675	1260
0.37972	-0.282536	1260
0.324689	-0.349364	1260
-0.443188	0.440635	1260
-0.325542	0.144808	1260
-0.278805	0.106402	1260
-0.0823024	-0.0766486	1260
-0.217832	-0.284176	1260
0.225137	0.298587	1320
0.118194	0.244749	1320
0.212925	0.202695	1320
0.218775	0.168601	1320
0.238536	0.13718	1320
0.180075	0.0898898	1320
0.326217	0.0198865	1320
0.262068	0.0195029	1320
0.264814	0.00096909	1320
0.232054	0.00128539	1320
0.336049	-0.0134392	1320
0.334953	-0.0358629	1320
0.233368	-0.0424693	1320
0.424987	-0.143707	1320
0.37451	-0.152285	1320
0.386174	-0.253211	1320
0.287861	-0.247011	1320
0.303149	-0.381289	1320
-0.10829	-0.186912	1320
-0.10929	-0.207973	1320
-0.20845	-0.184655	1320
