# Supplementary material for: Spinal premotor interneurons controlling antagonistic muscles are spatially intermingled
Source: eLife. 2022 Dec 13;11:e81976. doi: 10.7554/eLife.81976 (PMC9844990; doi:10.7554/eLife.81976)
Supplement: Figure 12—figure supplement 14—source data 3. [file elife-81976-fig12-figsupp14-data3.xlsx]

## Sheet: Sheet1
0.233995	0.0551466	-4680
0.222101	0.0671336	-4680
0.263255	0.120974	-4680
0.204721	-0.434296	-4680
0.204018	-0.409648	-4680
0.0278349	-0.353763	-4680
0.347568	-0.325102	-4680
0.505852	-0.155634	-4680
0.392409	-0.143879	-4680
0.445332	-0.116819	-4680
0.220833	-0.0988293	-4680
0.164322	-0.00943113	-4680
-0.066151	-0.159818	-4680
-0.0557693	-0.16127	-4680
-0.0543315	-0.118223	-4680
0.314348	0.0532802	-4560
0.365547	-0.349225	-4560
0.53842	-0.161574	-4560
0.223118	-0.138074	-4560
0.325263	-0.138509	-4560
0.21913	-0.121576	-4560
-0.083872	-0.18773	-4560
0.15031	-0.469454	-4440
0.0295993	-0.369445	-4440
0.325417	-0.351596	-4440
0.33151	-0.309378	-4440
0.289058	-0.288095	-4440
0.129717	-0.244211	-4440
0.268398	-0.216396	-4440
0.198401	-0.205132	-4440
0.194126	-0.155499	-4440
0.214523	-0.0982023	-4440
0.42871	-0.0962414	-4440
0.456275	-0.0811426	-4440
0.117478	-0.0439043	-4440
-0.162025	0.137858	-4440
-0.11909	-0.361643	-4440
-0.134445	-0.193381	-4440
0.141919	0.0257346	-4320
0.291082	0.071462	-4320
0.214336	0.0863804	-4320
0.142175	-0.461623	-4320
0.333621	-0.355749	-4320
0.338338	-0.143587	-4320
0.460032	-0.139605	-4320
0.196369	-0.12047	-4320
0.264276	-0.08721	-4320
0.211283	-0.0402898	-4320
0.281285	-0.0224681	-4320
0.156057	-0.00855042	-4320
-0.201541	0.129778	-4320
-0.0911214	-0.225162	-4320
-0.252736	-0.198376	-4320
0.0871613	0.0501892	-4200
0.120905	-0.460697	-4200
0.331595	-0.343327	-4200
0.191283	-0.200103	-4200
0.018873	-0.144547	-4200
0.450243	-0.148013	-4200
0.135074	-0.0623203	-4200
0.0483998	-0.0383569	-4200
-0.119235	-0.263123	-4200
-0.0916162	-0.229072	-4200
-0.16425	-0.143308	-4200
0.298012	-0.395413	-4080
0.19169	-0.202769	-4080
0.234487	-0.185186	-4080
0.193323	-0.172692	-4080
0.422427	-0.161505	-4080
0.136338	-0.0301928	-4080
0.149274	-0.0102719	-4080
-0.110169	-0.216812	-4080
-0.0912497	-0.217894	-4080
-0.203693	-0.16481	-4080
-0.148419	-0.15176	-4080
-0.15447	-0.134389	-4080
0.134293	0.00284601	-3960
0.0517877	0.0361981	-3960
0.290965	0.0794392	-3960
0.262735	0.0893937	-3960
0.256928	-0.232116	-3960
0.163528	-0.14022	-3960
0.329067	-0.132895	-3960
0.182459	-0.116458	-3960
0.242889	-0.0986694	-3960
0.205214	-0.0669108	-3960
0.142717	-0.0429717	-3960
-0.129964	-0.222126	-3960
-0.112462	-0.19781	-3960
-0.185201	-0.188588	-3960
-0.115636	-0.148614	-3960
0.138447	0.0151855	-3840
0.0644341	0.0131842	-3840
0.0344594	0.0209086	-3840
0.215227	0.0835172	-3840
0.24151	0.0864314	-3840
0.236174	0.102003	-3840
0.217711	0.189447	-3840
0.0603748	-0.419208	-3840
0.314598	-0.406394	-3840
0.171467	-0.22699	-3840
0.243621	-0.126021	-3840
0.458071	-0.126182	-3840
0.236395	-0.0804772	-3840
0.123339	-0.0666114	-3840
-0.0372494	-0.270498	-3840
-0.134414	-0.230298	-3840
-0.117464	-0.202822	-3840
-0.198331	-0.192606	-3840
-0.159304	-0.188187	-3840
-0.13912	-0.152195	-3840
0.182827	0.0152596	-3720
0.294623	0.0422396	-3720
0.268196	0.070952	-3720
0.112114	0.0947921	-3720
0.29864	-0.380741	-3720
0.276041	-0.167988	-3720
0.299869	-0.121744	-3720
0.275693	-0.0922518	-3720
0.0261391	-0.0379782	-3720
0.155893	-0.0397398	-3720
0.195025	-0.0220052	-3720
0.0808753	-0.0134327	-3720
-0.0150748	0.050336	-3720
-0.202189	0.163102	-3720
-0.115514	-0.328883	-3720
-0.113548	-0.213727	-3720
-0.235058	-0.158945	-3720
-0.183164	-0.125902	-3720
0.131298	0.0083141	-3600
0.10996	0.0334465	-3600
0.154381	0.056597	-3600
0.132382	0.0524094	-3600
0.129884	0.0626307	-3600
0.226847	0.111687	-3600
0.287577	0.220578	-3600
0.296799	-0.346968	-3600
0.0614893	-0.318103	-3600
0.18794	-0.14055	-3600
0.269084	-0.137415	-3600
0.225604	-0.137387	-3600
0.258827	-0.127576	-3600
0.528373	-0.0951407	-3600
0.23449	-0.100911	-3600
0.170233	-0.0842611	-3600
0.274058	-0.0856948	-3600
0.324944	-0.0555649	-3600
0.181981	-0.0670912	-3600
0.216057	-0.0524163	-3600
0.198543	-0.0501181	-3600
0.217499	-0.000534143	-3600
-0.233974	-0.382378	-3600
-0.103944	-0.206548	-3600
-0.162828	-0.203113	-3600
-0.185929	-0.194201	-3600
-0.0494316	-0.0601101	-3600
0.159104	0.00163623	-3480
0.147139	0.0231945	-3480
0.169295	0.0559726	-3480
0.137456	0.0662508	-3480
0.281849	0.0919097	-3480
0.268834	0.0795344	-3480
0.163581	0.0929248	-3480
0.291162	-0.391717	-3480
0.33675	-0.393331	-3480
0.0483937	-0.339114	-3480
0.339246	-0.245318	-3480
0.224775	-0.165422	-3480
0.262757	-0.155332	-3480
0.276852	-0.148559	-3480
0.263748	-0.139722	-3480
0.159247	-0.124995	-3480
0.2433	-0.129779	-3480
0.337365	-0.104476	-3480
0.27773	-0.105464	-3480
0.301127	-0.100231	-3480
0.245163	-0.0877083	-3480
0.380607	-0.0613811	-3480
0.194124	-0.0535905	-3480
-0.093263	-0.257833	-3480
-0.0637246	-0.24027	-3480
-0.162656	-0.20182	-3480
-0.136143	-0.19494	-3480
-0.16895	-0.130277	-3480
-0.0951099	-0.091595	-3480
0.129234	0.00338684	-3360
0.217297	0.0354049	-3360
0.210713	0.0611658	-3360
0.315246	0.0891039	-3360
0.223646	0.103567	-3360
0.240467	0.123567	-3360
0.26363	0.196339	-3360
0.25899	-0.16769	-3360
0.222718	-0.156207	-3360
0.316597	-0.13716	-3360
0.212498	-0.12094	-3360
0.339013	-0.118719	-3360
0.18571	-0.0868723	-3360
0.310616	-0.0767899	-3360
0.167505	-0.0688799	-3360
0.28318	-0.0600527	-3360
0.0655643	-0.0468325	-3360
0.0393858	-0.0521151	-3360
0.234124	-0.0153718	-3360
0.297074	-0.0146822	-3360
0.309765	-0.000834448	-3360
-0.169697	-0.203424	-3360
-0.133421	-0.167216	-3360
-0.0613376	-0.0813214	-3360
-0.363534	-0.0382463	-3360
0.107067	0.00275159	-3240
0.277646	0.00767233	-3240
0.196041	0.0463888	-3240
0.137707	0.0559758	-3240
0.119984	0.0476273	-3240
0.225364	0.0689505	-3240
0.213615	0.103014	-3240
0.215749	0.125937	-3240
0.331033	-0.15878	-3240
0.199928	-0.140875	-3240
0.206258	-0.109812	-3240
0.296187	-0.108676	-3240
0.173294	-0.098178	-3240
0.337507	-0.0743313	-3240
0.158074	-0.0425138	-3240
-0.10741	-0.345625	-3240
-0.113493	-0.23783	-3240
-0.109985	-0.218809	-3240
-0.101183	-0.203904	-3240
-0.169174	-0.172036	-3240
-0.133166	-0.137672	-3240
-0.0670405	-0.0254109	-3240
0.306781	0.00737444	-3120
0.176646	0.0243484	-3120
0.114849	0.0282899	-3120
0.189831	0.0436321	-3120
0.135649	0.0376351	-3120
0.284159	0.0668644	-3120
0.255059	0.0992936	-3120
0.32044	0.129328	-3120
0.235691	0.158148	-3120
0.160097	0.179261	-3120
0.242335	-0.416384	-3120
0.31858	-0.220909	-3120
0.225742	-0.18593	-3120
0.347805	-0.111473	-3120
0.229549	-0.125274	-3120
0.191898	-0.126028	-3120
0.374046	-0.082311	-3120
0.329305	-0.0853819	-3120
0.312095	-0.0790061	-3120
0.190693	-0.0691747	-3120
0.307574	-0.0255406	-3120
0.202173	-0.0368434	-3120
0.241325	-0.0243334	-3120
0.25676	-0.0151508	-3120
0.132573	-0.0120045	-3120
-0.130549	-0.279363	-3120
-0.117613	-0.21917	-3120
-0.102039	-0.168176	-3120
0.182644	0.00665112	-3000
0.0937248	0.023692	-3000
0.202197	0.035433	-3000
0.164906	0.02986	-3000
0.248522	0.0466419	-3000
0.266898	0.07681	-3000
0.420538	0.0998299	-3000
0.216453	0.0898812	-3000
0.230526	0.0984856	-3000
0.270096	0.124453	-3000
0.143921	0.122787	-3000
0.130523	-0.240026	-3000
0.273054	-0.179027	-3000
0.295141	-0.171022	-3000
0.324647	-0.150036	-3000
0.22099	-0.161461	-3000
0.245715	-0.142236	-3000
0.331711	-0.13197	-3000
0.279368	-0.125645	-3000
0.17428	-0.123011	-3000
0.331676	-0.107931	-3000
0.204542	-0.110133	-3000
0.149829	-0.117918	-3000
0.186242	-0.090284	-3000
0.148205	-0.0992875	-3000
0.319364	-0.0635305	-3000
0.109868	-0.0749848	-3000
0.0315258	-0.0658199	-3000
0.213667	-0.0451347	-3000
0.194793	-0.0225417	-3000
0.270969	-0.00857053	-3000
0.0951762	-0.00981795	-3000
-0.0868429	-0.243447	-3000
-0.133387	-0.150304	-3000
-0.122942	-0.146106	-3000
0.270824	0.0225727	-2880
0.135009	0.0113137	-2880
0.180194	0.0288536	-2880
0.336747	0.0457524	-2880
0.133521	0.0424518	-2880
0.0991513	0.0476687	-2880
0.261718	0.0648949	-2880
0.171667	0.0791956	-2880
0.245098	0.105185	-2880
0.231259	0.112059	-2880
0.307157	0.120222	-2880
0.278766	0.122998	-2880
0.228704	0.152922	-2880
0.199658	0.168218	-2880
0.192788	0.175999	-2880
0.186364	0.192687	-2880
0.195904	0.193375	-2880
0.262951	0.211856	-2880
0.282653	-0.162626	-2880
0.328191	-0.138939	-2880
0.213608	-0.148316	-2880
0.364107	-0.125747	-2880
0.250271	-0.12559	-2880
0.218607	-0.119611	-2880
0.292322	-0.119517	-2880
0.200713	-0.119446	-2880
0.243794	-0.11556	-2880
0.386694	-0.0879658	-2880
0.323203	-0.0885178	-2880
0.224573	-0.0970348	-2880
0.264834	-0.0901596	-2880
0.284084	-0.0838077	-2880
0.205776	-0.0864746	-2880
0.169599	-0.0731041	-2880
0.0348154	-0.0731758	-2880
0.213677	-0.0478471	-2880
0.373422	-0.0458182	-2880
0.297599	-0.0318742	-2880
0.18579	-0.0317093	-2880
0.247919	-0.00548442	-2880
0.266375	-0.00903316	-2880
0.14524	-0.00434452	-2880
-0.144652	-0.278386	-2880
-0.116081	-0.279095	-2880
-0.202357	-0.241177	-2880
-0.181157	-0.17934	-2880
0.297313	0.00338202	-2760
0.164005	0.0134414	-2760
0.221492	0.0209363	-2760
0.292101	0.0244794	-2760
0.0991806	0.0213823	-2760
0.276662	0.0394631	-2760
0.113322	0.0292799	-2760
0.214323	0.0416558	-2760
0.0911886	0.0532204	-2760
0.220778	0.0558343	-2760
0.194496	0.0624373	-2760
0.163482	0.0639301	-2760
0.217791	0.0699818	-2760
0.151761	0.0916676	-2760
0.260831	0.103697	-2760
0.228999	0.120954	-2760
0.0920172	0.115013	-2760
0.164687	0.131558	-2760
0.178926	0.150469	-2760
0.145165	-0.455933	-2760
0.293175	-0.22571	-2760
0.0216264	-0.226589	-2760
0.314747	-0.193019	-2760
0.349081	-0.146516	-2760
0.393163	-0.14538	-2760
0.234772	-0.13866	-2760
0.164561	-0.127397	-2760
0.141316	-0.125345	-2760
0.301516	-0.117651	-2760
0.272339	-0.0664063	-2760
0.144734	-0.0591149	-2760
0.256355	-0.038384	-2760
0.239025	-0.00857375	-2760
0.205955	-0.000571584	-2760
-0.126101	-0.289579	-2760
-0.135243	-0.27528	-2760
-0.110569	-0.264989	-2760
-0.0772968	-0.207867	-2760
-0.148869	-0.192219	-2760
0.266468	0.00770287	-2640
0.147931	0.00333929	-2640
0.312005	0.0313621	-2640
0.260577	0.0204739	-2640
0.280611	0.029278	-2640
0.272304	0.0364184	-2640
0.120458	0.0273775	-2640
0.136536	0.0442456	-2640
0.298723	0.0674845	-2640
0.174053	0.0690831	-2640
0.257058	0.0841869	-2640
0.0898754	0.0639262	-2640
0.122631	0.0708416	-2640
0.220169	0.092097	-2640
0.190879	0.117136	-2640
0.157228	0.108545	-2640
0.163935	0.125466	-2640
0.113527	0.126011	-2640
0.212467	0.144495	-2640
0.196131	0.156734	-2640
0.118933	0.157249	-2640
0.261968	0.179647	-2640
0.0571448	0.164543	-2640
0.176716	0.181192	-2640
0.151322	0.19912	-2640
0.169756	-0.436717	-2640
0.311267	-0.209126	-2640
0.198131	-0.136396	-2640
0.262721	-0.0929605	-2640
0.275151	-0.0914205	-2640
0.25883	-0.0826518	-2640
0.205482	-0.0853731	-2640
0.269116	-0.0652341	-2640
0.327538	-0.0560927	-2640
0.233188	-0.0669639	-2640
0.129259	-0.0763865	-2640
0.349017	-0.038253	-2640
0.153451	-0.0618869	-2640
0.322628	-0.0290554	-2640
0.218699	-0.0244636	-2640
0.28809	-0.0210603	-2640
0.336582	-0.0183319	-2640
0.0700252	-0.0409392	-2640
0.250231	-0.0116517	-2640
0.133635	-0.0220939	-2640
0.189399	-0.0093734	-2640
0.126299	-0.00470428	-2640
-0.0584372	-0.462606	-2640
-0.0661479	-0.40922	-2640
-0.111903	-0.256976	-2640
-0.179216	-0.214824	-2640
-0.108736	-0.194413	-2640
0.289483	0.0116413	-2520
0.349353	0.0167755	-2520
0.155022	0.0252859	-2520
0.18161	0.0267187	-2520
0.115103	0.0184205	-2520
0.254976	0.0358195	-2520
0.210078	0.0405556	-2520
0.170364	0.0337167	-2520
0.30045	0.0500544	-2520
0.0915285	0.0386187	-2520
0.301646	0.068329	-2520
0.282214	0.0730518	-2520
0.196679	0.0991072	-2520
0.223289	0.101064	-2520
0.0961545	0.11102	-2520
0.206102	0.128579	-2520
0.193044	0.12897	-2520
0.115861	0.125527	-2520
0.218231	0.144711	-2520
0.114567	0.173247	-2520
0.253131	0.221822	-2520
0.268718	-0.25279	-2520
0.247399	-0.215532	-2520
0.252424	-0.187984	-2520
0.221871	-0.187109	-2520
0.33261	-0.179763	-2520
0.243104	-0.16927	-2520
0.205315	-0.150897	-2520
0.244545	-0.138979	-2520
0.295727	-0.139405	-2520
0.225722	-0.118847	-2520
0.360725	-0.108851	-2520
0.163117	-0.118553	-2520
0.321381	-0.0976691	-2520
0.25431	-0.0987307	-2520
0.198952	-0.0931049	-2520
0.273389	-0.0714773	-2520
0.356116	-0.0547703	-2520
0.173264	-0.0583194	-2520
0.206181	-0.0414419	-2520
0.293551	-0.0450298	-2520
0.14185	-0.0494545	-2520
0.228007	-0.0421006	-2520
0.280744	-0.035018	-2520
0.346887	-0.0147077	-2520
0.344169	-0.00677267	-2520
-0.204384	-0.241342	-2520
-0.104638	-0.230101	-2520
-0.143957	-0.213864	-2520
-0.162865	-0.21718	-2520
-0.18599	-0.200456	-2520
-0.156505	-0.182835	-2520
0.165975	0.00476258	-2400
0.156562	0.00825342	-2400
0.133179	0.00838968	-2400
0.238759	0.0282446	-2400
0.173471	0.017253	-2400
0.209919	0.0216328	-2400
0.178902	0.0299057	-2400
0.128098	0.0331759	-2400
0.244388	0.0423766	-2400
0.285011	0.0579686	-2400
0.265005	0.064217	-2400
0.239796	0.0686292	-2400
0.19958	0.0739693	-2400
0.21415	0.0809769	-2400
0.251498	0.0861223	-2400
0.125098	0.127422	-2400
0.113818	0.127617	-2400
0.043486	0.122789	-2400
0.210417	0.136726	-2400
0.304814	-0.216684	-2400
0.284401	-0.198633	-2400
0.21922	-0.188172	-2400
0.255581	-0.179641	-2400
0.319053	-0.152147	-2400
0.189338	-0.156554	-2400
0.173802	-0.149795	-2400
0.201197	-0.132719	-2400
0.288637	-0.121781	-2400
0.225796	-0.118218	-2400
0.173995	-0.120494	-2400
0.251076	-0.108186	-2400
0.298803	-0.104291	-2400
0.255912	-0.083293	-2400
0.303873	-0.0807469	-2400
0.221086	-0.0729843	-2400
0.274799	-0.0664254	-2400
0.182274	-0.0750944	-2400
0.125896	-0.0653185	-2400
0.137664	-0.0514536	-2400
0.0461813	-0.0640316	-2400
0.225765	-0.046147	-2400
0.274611	-0.0359975	-2400
0.254544	-0.0174072	-2400
0.0523653	-0.0345515	-2400
0.117785	-0.0273354	-2400
-0.271445	0.221018	-2400
-0.0837286	-0.297691	-2400
-0.082887	-0.221507	-2400
-0.126429	-0.212154	-2400
-0.104045	-0.201041	-2400
-0.156668	-0.175849	-2400
-0.139432	-0.173129	-2400
-0.108513	-0.167796	-2400
-0.221082	-0.164461	-2400
-0.0731313	-0.105854	-2400
0.232691	0.0239738	-2280
0.298777	0.0279169	-2280
0.340879	0.0330231	-2280
0.121056	0.0197022	-2280
0.181306	0.0413627	-2280
0.278304	0.064101	-2280
0.170196	0.0581273	-2280
0.211102	0.0730321	-2280
0.284323	0.0830672	-2280
0.187714	0.0771854	-2280
0.231849	0.0883772	-2280
0.24458	0.0889686	-2280
0.165621	0.0887058	-2280
0.244648	0.111898	-2280
0.223282	0.0980705	-2280
0.126078	0.0958821	-2280
0.331419	0.137219	-2280
0.205289	0.132763	-2280
0.0985042	0.127722	-2280
0.229364	0.155344	-2280
0.191963	0.159365	-2280
0.308999	0.193657	-2280
0.372256	-0.271535	-2280
0.248331	-0.263236	-2280
0.262561	-0.223949	-2280
0.304125	-0.21187	-2280
0.198944	-0.198102	-2280
0.272703	-0.184801	-2280
0.208387	-0.165191	-2280
0.221009	-0.169468	-2280
0.221433	-0.15366	-2280
0.266072	-0.127578	-2280
0.208118	-0.0986451	-2280
0.276941	-0.0990984	-2280
0.126055	-0.115419	-2280
0.23028	-0.105248	-2280
0.24399	-0.0907336	-2280
0.262401	-0.0867925	-2280
0.160942	-0.0692658	-2280
0.324667	-0.0620197	-2280
0.232382	-0.0698873	-2280
0.316432	-0.0181921	-2280
0.2222	-0.0314193	-2280
0.174256	-0.0249483	-2280
0.155381	-0.0211168	-2280
0.251967	-0.00223014	-2280
0.141151	-0.00333424	-2280
-0.293025	-0.443216	-2280
-0.162298	-0.290134	-2280
-0.120892	-0.274825	-2280
-0.0859332	-0.258573	-2280
-0.136053	-0.241916	-2280
-0.159033	-0.232424	-2280
-0.169168	-0.240286	-2280
-0.261393	-0.20799	-2280
-0.129938	-0.193377	-2280
-0.117654	-0.176613	-2280
-0.16026	-0.16409	-2280
-0.0452824	-0.131472	-2280
-0.0822236	-0.0852522	-2280
0.158754	0.00121032	-2160
0.295604	0.00659756	-2160
0.1233	0.00745267	-2160
0.254534	0.00914317	-2160
0.3104	0.0206083	-2160
0.0874628	0.0215161	-2160
0.259253	0.0283241	-2160
0.189654	0.0320735	-2160
0.10283	0.0342376	-2160
0.126379	0.0413877	-2160
0.258609	0.0444924	-2160
0.286207	0.0439267	-2160
0.326349	0.0635286	-2160
0.219355	0.0609106	-2160
0.230637	0.0606738	-2160
0.158115	0.0680739	-2160
0.221074	0.0726323	-2160
0.186051	0.0943128	-2160
0.281628	0.110731	-2160
0.243107	0.120328	-2160
0.212409	0.121861	-2160
0.187126	0.13622	-2160
0.117283	0.138851	-2160
0.240755	0.154553	-2160
0.202991	0.154079	-2160
0.152638	0.248813	-2160
0.201787	-0.332683	-2160
0.188226	-0.324926	-2160
0.238216	-0.300688	-2160
0.196798	-0.272485	-2160
0.204019	-0.259478	-2160
0.241679	-0.249727	-2160
0.253267	-0.244047	-2160
0.187593	-0.22815	-2160
0.320524	-0.227629	-2160
0.273623	-0.227837	-2160
0.221572	-0.215413	-2160
0.186586	-0.190301	-2160
0.253485	-0.18228	-2160
0.283684	-0.181828	-2160
0.190682	-0.176411	-2160
0.140048	-0.170133	-2160
0.325155	-0.168362	-2160
0.339437	-0.164432	-2160
0.172247	-0.142979	-2160
0.295594	-0.13618	-2160
0.33966	-0.122242	-2160
0.18195	-0.1222	-2160
0.197878	-0.115728	-2160
0.167128	-0.111735	-2160
0.250515	-0.0982617	-2160
0.0772094	-0.100199	-2160
0.320732	-0.0743161	-2160
0.136321	-0.0749967	-2160
0.283487	-0.0730522	-2160
0.0398143	-0.0720382	-2160
0.188517	-0.0724132	-2160
0.244903	-0.06842	-2160
0.158743	-0.0678991	-2160
0.0745617	-0.0640726	-2160
0.234878	-0.0577181	-2160
0.178555	-0.0556485	-2160
0.133689	-0.0505302	-2160
0.221759	-0.041877	-2160
0.256667	-0.0438424	-2160
0.0951671	-0.0414117	-2160
0.305754	-0.0352795	-2160
0.195946	-0.0325432	-2160
0.252639	-0.0257443	-2160
0.272792	-0.024647	-2160
0.11056	-0.0156952	-2160
0.317783	-0.00793789	-2160
-0.215868	0.17187	-2160
-0.0926175	-0.261662	-2160
-0.208023	-0.263695	-2160
-0.15733	-0.2591	-2160
-0.101806	-0.239354	-2160
-0.168497	-0.228582	-2160
-0.162415	-0.219158	-2160
-0.0719166	-0.208717	-2160
-0.120528	-0.202776	-2160
-0.185591	-0.192851	-2160
-0.116759	-0.182278	-2160
-0.0584791	-0.175549	-2160
-0.254267	-0.147614	-2160
-0.150169	-0.0889192	-2160
0.200254	0.00409029	-2040
0.225803	0.00938669	-2040
0.296458	0.0149569	-2040
0.149523	0.0128419	-2040
0.245346	0.042511	-2040
0.228881	0.0422896	-2040
0.215828	0.0743361	-2040
0.192429	0.0839791	-2040
0.227505	0.0798131	-2040
0.18259	0.0797432	-2040
0.150582	0.115367	-2040
0.16593	0.119609	-2040
0.0225844	-0.442447	-2040
0.194905	-0.282743	-2040
0.354186	-0.250222	-2040
0.290832	-0.238545	-2040
0.202327	-0.227261	-2040
0.182694	-0.206879	-2040
0.127387	-0.205625	-2040
0.221495	-0.199061	-2040
0.287428	-0.190863	-2040
0.299857	-0.182854	-2040
0.144078	-0.17816	-2040
0.1232	-0.167307	-2040
0.300798	-0.14868	-2040
0.239277	-0.144618	-2040
0.198544	-0.136762	-2040
0.157258	-0.123159	-2040
0.222382	-0.119181	-2040
0.203418	-0.110247	-2040
0.228003	-0.110026	-2040
0.177647	-0.110121	-2040
0.111075	-0.100161	-2040
0.186405	-0.0999962	-2040
0.196778	-0.0954662	-2040
0.058389	-0.088687	-2040
0.257132	-0.0855635	-2040
0.27572	-0.0713209	-2040
0.256041	-0.0662523	-2040
0.324903	-0.0564953	-2040
0.1117	-0.0494944	-2040
0.224142	-0.0422084	-2040
0.13313	-0.0400289	-2040
0.162621	-0.0335918	-2040
0.207663	-0.018025	-2040
0.0876039	-0.00741276	-2040
0.261024	-0.00141919	-2040
0.122802	-0.000475177	-2040
-0.305354	0.221038	-2040
-0.0819219	-0.34857	-2040
-0.131789	-0.288218	-2040
-0.204176	-0.268984	-2040
-0.11411	-0.25741	-2040
-0.119193	-0.241917	-2040
-0.151658	-0.230082	-2040
-0.0735335	-0.211923	-2040
-0.118915	-0.202846	-2040
-0.188492	-0.176728	-2040
-0.187612	-0.164242	-2040
-0.0926994	-0.117712	-2040
0.144444	0.00610052	-1920
0.244228	0.015899	-1920
0.11199	0.0132142	-1920
0.264343	0.0279191	-1920
0.218625	0.0329052	-1920
0.196045	0.0306184	-1920
0.126294	0.0273546	-1920
0.18577	0.0326519	-1920
0.229629	0.0375656	-1920
0.362135	0.051062	-1920
0.204021	0.0443536	-1920
0.183611	0.0614828	-1920
0.235429	0.0682491	-1920
0.260464	0.0733075	-1920
0.217718	0.0769042	-1920
0.25034	0.0840902	-1920
0.172635	0.0924775	-1920
0.301946	0.108782	-1920
0.200904	0.106379	-1920
0.322851	0.169056	-1920
0.149882	0.157861	-1920
0.17898	-0.29304	-1920
0.388166	-0.259446	-1920
0.165244	-0.255865	-1920
0.25113	-0.245799	-1920
0.227047	-0.235423	-1920
0.244885	-0.222594	-1920
0.388578	-0.193393	-1920
0.369693	-0.18559	-1920
0.383635	-0.181831	-1920
0.258594	-0.190876	-1920
0.164181	-0.189533	-1920
0.270109	-0.155761	-1920
0.324972	-0.143186	-1920
0.140871	-0.151115	-1920
0.286868	-0.124177	-1920
0.305486	-0.111988	-1920
0.24966	-0.0947156	-1920
0.330215	-0.081595	-1920
0.189616	-0.089873	-1920
0.240171	-0.0819563	-1920
0.218854	-0.0808597	-1920
0.347257	-0.0622817	-1920
0.359508	-0.0558038	-1920
0.183817	-0.0603041	-1920
0.260586	-0.0463975	-1920
0.19059	-0.0455292	-1920
0.245314	-0.039159	-1920
0.278837	-0.0343545	-1920
0.14032	-0.0431903	-1920
0.216477	-0.0344686	-1920
0.270838	-0.0205873	-1920
0.346172	-0.0120367	-1920
0.211562	-0.00579969	-1920
0.164242	-0.00869003	-1920
-0.0942587	-0.275103	-1920
-0.132846	-0.280135	-1920
-0.153174	-0.277962	-1920
-0.0901941	-0.234938	-1920
-0.163558	-0.240751	-1920
-0.1274	-0.210232	-1920
-0.0826894	-0.209886	-1920
-0.115508	-0.20507	-1920
-0.198049	-0.188433	-1920
-0.111258	-0.178461	-1920
-0.086066	-0.169755	-1920
-0.144505	-0.168593	-1920
-0.138054	-0.131389	-1920
-0.146395	-0.0773346	-1920
-0.183326	-0.0654109	-1920
0.254661	0.00194643	-1800
0.310196	0.00458899	-1800
0.185223	0.00745457	-1800
0.204184	0.0154228	-1800
0.214886	0.0132195	-1800
0.170519	0.0179707	-1800
0.234504	0.0275136	-1800
0.147177	0.0293654	-1800
0.247458	0.040848	-1800
0.305609	0.0509046	-1800
0.146992	0.0474578	-1800
0.101702	0.0489379	-1800
0.227234	0.0604475	-1800
0.180318	0.0646986	-1800
0.250977	0.0768097	-1800
0.23494	0.0713219	-1800
0.111542	0.0694768	-1800
0.281995	0.0801484	-1800
0.213188	0.0820813	-1800
0.314541	0.0823517	-1800
0.224885	0.091604	-1800
0.198156	0.104594	-1800
0.240553	0.112055	-1800
0.20226	0.114867	-1800
0.20715	0.134189	-1800
0.293661	0.140664	-1800
0.269128	0.141806	-1800
0.307472	0.156032	-1800
0.270267	0.165278	-1800
0.193241	-0.247231	-1800
0.20775	-0.204871	-1800
0.229317	-0.199113	-1800
0.132222	-0.179936	-1800
0.210243	-0.178716	-1800
0.160095	-0.161189	-1800
0.193775	-0.154809	-1800
0.187808	-0.134029	-1800
0.12288	-0.138628	-1800
0.179215	-0.120336	-1800
0.342014	-0.100429	-1800
0.0994346	-0.0836802	-1800
0.28041	-0.0953167	-1800
0.130904	-0.092853	-1800
0.249854	-0.0848582	-1800
0.117329	-0.0825081	-1800
0.0494352	-0.0781011	-1800
0.0602805	-0.0750155	-1800
0.327931	-0.0574352	-1800
0.13431	-0.0605686	-1800
0.293235	-0.0477839	-1800
0.194739	-0.0542121	-1800
0.254435	-0.04718	-1800
0.1083	-0.0442858	-1800
0.10397	-0.0336359	-1800
0.204733	-0.0293903	-1800
0.259119	-0.0238949	-1800
0.193416	-0.0235063	-1800
0.188604	-0.0139686	-1800
0.110424	-0.000173412	-1800
-0.178884	-0.254707	-1800
-0.141773	-0.240875	-1800
-0.156759	-0.239865	-1800
-0.111673	-0.223874	-1800
-0.0735822	-0.223211	-1800
-0.0422587	-0.215583	-1800
-0.0954578	-0.197104	-1800
-0.174614	-0.193933	-1800
-0.0441422	-0.185124	-1800
-0.0836951	-0.18196	-1800
-0.065429	-0.144293	-1800
0.323515	0.00786694	-1680
0.302603	0.00425516	-1680
0.33261	0.0117909	-1680
0.281056	0.0124151	-1680
0.181969	0.00475202	-1680
0.19065	0.0140331	-1680
0.114986	0.00460551	-1680
0.143485	0.0100773	-1680
0.244659	0.0279452	-1680
0.268835	0.0262699	-1680
0.289788	0.0386276	-1680
0.177196	0.0252825	-1680
0.310179	0.0436854	-1680
0.164934	0.030009	-1680
0.0867744	0.0304422	-1680
0.138983	0.0429274	-1680
0.188829	0.051323	-1680
0.220182	0.0596423	-1680
0.199643	0.0553489	-1680
0.208073	0.0637382	-1680
0.154253	0.0623113	-1680
0.279639	0.0807588	-1680
0.253663	0.0834406	-1680
0.100443	0.0664327	-1680
0.207945	0.0880015	-1680
0.268989	0.0974737	-1680
0.113176	0.0801664	-1680
0.193924	0.0980406	-1680
0.22389	0.108341	-1680
0.247089	0.113666	-1680
0.140267	0.102066	-1680
0.287788	0.125119	-1680
0.244209	0.133846	-1680
0.100059	0.117444	-1680
0.121974	0.133248	-1680
0.192537	0.149988	-1680
0.0740981	0.137859	-1680
0.207685	-0.307449	-1680
0.231211	-0.281807	-1680
0.196973	-0.291982	-1680
0.198103	-0.25585	-1680
0.263725	-0.234063	-1680
0.184102	-0.242565	-1680
0.20925	-0.238831	-1680
0.224008	-0.217877	-1680
0.345588	-0.201234	-1680
0.280315	-0.205264	-1680
0.215445	-0.178615	-1680
0.266385	-0.169239	-1680
0.199464	-0.167674	-1680
0.231518	-0.140595	-1680
0.189657	-0.144329	-1680
0.30313	-0.108949	-1680
0.244347	-0.115121	-1680
0.35476	-0.0934814	-1680
0.141689	-0.110869	-1680
0.357692	-0.0708615	-1680
0.184066	-0.096967	-1680
0.205782	-0.0913926	-1680
0.195397	-0.089989	-1680
0.239257	-0.0770739	-1680
0.181954	-0.0750725	-1680
0.117324	-0.08379	-1680
0.159941	-0.0748106	-1680
0.054828	-0.0794111	-1680
0.29562	-0.0364684	-1680
0.339097	-0.0268913	-1680
0.0836283	-0.0615463	-1680
0.389884	-0.0165552	-1680
0.28763	-0.0270256	-1680
0.103589	-0.0526676	-1680
0.282443	-0.0198326	-1680
0.314599	-0.0126128	-1680
0.147854	-0.0260182	-1680
0.242787	-0.00411025	-1680
0.214468	-0.0082608	-1680
-0.0840224	-0.362711	-1680
-0.0960357	-0.352941	-1680
-0.0740574	-0.317518	-1680
-0.138052	-0.320101	-1680
-0.167091	-0.292357	-1680
-0.106418	-0.280853	-1680
-0.216136	-0.274951	-1680
-0.0832313	-0.251446	-1680
-0.108959	-0.245859	-1680
-0.129713	-0.242378	-1680
-0.163303	-0.234924	-1680
-0.101796	-0.210079	-1680
-0.174228	-0.193648	-1680
-0.0491097	-0.17441	-1680
-0.196	-0.191248	-1680
-0.107496	-0.179401	-1680
-0.0470669	-0.160219	-1680
-0.0421629	-0.141606	-1680
-0.166029	-0.138237	-1680
-0.138638	-0.0737437	-1680
0.130417	0.00321235	-1560
0.195532	0.0289356	-1560
0.215779	0.0370214	-1560
0.119847	0.0385177	-1560
0.159503	0.0372963	-1560
0.313167	0.0515442	-1560
0.189111	0.0457791	-1560
0.245141	0.0516541	-1560
0.25517	0.0662685	-1560
0.0852773	0.0616881	-1560
0.103673	0.0699755	-1560
0.297334	0.0888527	-1560
0.25692	0.0874236	-1560
0.24326	0.0873259	-1560
0.219341	0.0929322	-1560
0.232565	0.0962972	-1560
0.0833459	0.0983737	-1560
0.206519	0.109128	-1560
0.151707	0.111522	-1560
0.158771	0.119291	-1560
0.195311	0.124671	-1560
0.0810332	0.119407	-1560
0.212574	0.140965	-1560
0.168979	0.145478	-1560
0.248056	0.165387	-1560
0.224037	-0.372703	-1560
0.44109	-0.298311	-1560
0.127251	-0.315072	-1560
0.251904	-0.253825	-1560
0.187491	-0.24335	-1560
0.183828	-0.222737	-1560
0.237576	-0.200878	-1560
0.189698	-0.197529	-1560
0.226294	-0.179147	-1560
0.218428	-0.125972	-1560
0.272723	-0.0995748	-1560
0.328668	-0.06904	-1560
0.0205079	-0.0905491	-1560
0.153578	-0.0818412	-1560
0.163536	-0.0765085	-1560
0.143008	-0.0647687	-1560
0.19945	-0.0598237	-1560
0.0477681	-0.0602495	-1560
0.153879	-0.0580185	-1560
0.283875	-0.049298	-1560
0.315349	-0.0466856	-1560
0.254989	-0.0383591	-1560
0.117103	-0.0481984	-1560
0.281306	-0.0226977	-1560
0.310613	-0.00695994	-1560
0.189798	-0.00896847	-1560
0.129453	-0.0129474	-1560
0.0677543	-0.00903838	-1560
0.072515	-0.00188141	-1560
-0.106123	-0.308301	-1560
-0.150915	-0.293493	-1560
-0.141761	-0.281264	-1560
-0.10711	-0.266041	-1560
-0.183218	-0.264607	-1560
-0.146179	-0.248774	-1560
-0.12364	-0.243233	-1560
-0.0887625	-0.227661	-1560
-0.0693767	-0.22027	-1560
-0.143106	-0.213885	-1560
-0.105906	-0.20445	-1560
-0.223672	-0.126457	-1560
-0.0673011	-0.052451	-1560
0.221122	0.00222717	-1440
0.143952	0.0157875	-1440
0.299575	0.00687241	-1440
0.180177	0.0199809	-1440
0.228007	0.0206491	-1440
0.249343	0.0418136	-1440
0.160392	0.0364938	-1440
0.196017	0.035622	-1440
0.211117	0.03993	-1440
0.221735	0.0389246	-1440
0.324252	0.0474897	-1440
0.203986	0.0562202	-1440
0.221748	0.0729367	-1440
0.195162	0.0655807	-1440
0.241807	0.0834362	-1440
0.196009	0.0894114	-1440
0.0554503	0.0866942	-1440
0.0773818	0.0894623	-1440
0.213339	0.0966529	-1440
0.0523783	0.109354	-1440
0.19533	0.111785	-1440
0.11202	0.118282	-1440
0.155698	0.128686	-1440
0.17268	-0.2795	-1440
0.180644	-0.253847	-1440
0.200623	-0.24103	-1440
0.223714	-0.205515	-1440
0.0025431	-0.191672	-1440
0.25528	-0.184468	-1440
0.29917	-0.157226	-1440
0.247818	-0.140648	-1440
0.169604	-0.114651	-1440
0.199856	-0.115308	-1440
0.220179	-0.10067	-1440
0.108974	-0.108036	-1440
0.130699	-0.101208	-1440
0.275405	-0.0826966	-1440
0.188304	-0.0836541	-1440
0.0492975	-0.0752868	-1440
0.0650453	-0.0745546	-1440
0.0991194	-0.0744044	-1440
0.161551	-0.0643286	-1440
0.126811	-0.0591843	-1440
0.120134	-0.0569689	-1440
0.207336	-0.0470683	-1440
0.122898	-0.0472373	-1440
0.138844	-0.0449343	-1440
0.187798	-0.035259	-1440
0.123762	-0.0341826	-1440
0.277595	-0.031867	-1440
0.133907	-0.0309658	-1440
0.295961	-0.0186684	-1440
0.215922	-0.0203831	-1440
0.147579	-0.0150949	-1440
0.104655	-0.0059516	-1440
0.0821947	-0.00053821	-1440
0.279984	-0.000168973	-1440
-0.0648741	-0.314941	-1440
-0.121023	-0.310798	-1440
-0.0937816	-0.304541	-1440
-0.0824811	-0.300596	-1440
-0.111852	-0.287676	-1440
-0.117254	-0.255275	-1440
-0.0580948	-0.250114	-1440
-0.136982	-0.245576	-1440
-0.108777	-0.234109	-1440
-0.0758441	-0.201176	-1440
-0.0854233	-0.176743	-1440
-0.143789	-0.152316	-1440
-0.192277	-0.146031	-1440
-0.0867635	-0.131336	-1440
-0.133104	-0.128154	-1440
-0.0408183	-0.085506	-1440
0.271839	0.00968792	-1320
0.201985	0.00110565	-1320
0.167133	0.00465182	-1320
0.283589	0.0154184	-1320
0.300909	0.0160252	-1320
0.181813	0.0104632	-1320
0.221572	0.0183106	-1320
0.125246	0.00746314	-1320
0.248499	0.0266098	-1320
0.256212	0.0371134	-1320
0.0764851	0.0164432	-1320
0.131763	0.0223085	-1320
0.295153	0.0560039	-1320
0.233513	0.0501992	-1320
0.332277	0.0647345	-1320
0.0857765	0.0356977	-1320
0.21226	0.0572444	-1320
0.144657	0.0584849	-1320
0.0941259	0.0450485	-1320
0.23122	0.0646333	-1320
0.220956	0.0763708	-1320
0.16338	0.0768831	-1320
0.277761	0.0901644	-1320
0.281591	0.120752	-1320
0.102977	0.115689	-1320
0.269447	0.13495	-1320
0.201322	0.147705	-1320
0.119257	0.165773	-1320
0.0711276	0.170054	-1320
0.0619811	0.258796	-1320
0.217907	-0.421641	-1320
0.142581	-0.434761	-1320
0.161853	-0.402784	-1320
0.167655	-0.385264	-1320
0.275157	-0.362608	-1320
0.21947	-0.31478	-1320
0.234585	-0.293466	-1320
0.209775	-0.289333	-1320
0.274365	-0.280219	-1320
0.171771	-0.276239	-1320
0.345461	-0.245505	-1320
0.265938	-0.245344	-1320
0.302736	-0.23838	-1320
0.291141	-0.23854	-1320
0.222483	-0.228905	-1320
0.27804	-0.214336	-1320
0.135246	-0.223276	-1320
0.17984	-0.220232	-1320
0.226334	-0.213575	-1320
0.238509	-0.196788	-1320
0.2735	-0.166648	-1320
0.176108	-0.172303	-1320
0.211965	-0.154429	-1320
0.232773	-0.13823	-1320
0.260353	-0.117511	-1320
0.27027	-0.103135	-1320
0.233508	-0.103288	-1320
0.258851	-0.0954362	-1320
0.197838	-0.0839782	-1320
0.259675	-0.0696424	-1320
0.290624	-0.0626849	-1320
0.127762	-0.0739024	-1320
0.276249	-0.0531499	-1320
0.0870033	-0.0682336	-1320
0.207943	-0.0525557	-1320
0.0914964	-0.0519213	-1320
0.121529	-0.0456782	-1320
0.241956	-0.0218142	-1320
0.165528	-0.0369112	-1320
0.111063	-0.0354889	-1320
0.14385	-0.0226288	-1320
0.156076	-0.00428672	-1320
0.114277	-0.00497446	-1320
-0.0778882	-0.275016	-1320
-0.164956	-0.26609	-1320
-0.0593747	-0.253935	-1320
-0.119387	-0.235497	-1320
-0.117444	-0.218437	-1320
-0.0772406	-0.209193	-1320
-0.12521	-0.176748	-1320
-0.0634917	-0.141582	-1320
-0.168605	-0.141547	-1320
-0.137854	-0.0759641	-1320
0.330715	0.00317951	-1200
0.285887	0.0179804	-1200
0.266563	0.0114421	-1200
0.192919	0.00962818	-1200
0.20653	0.0161596	-1200
0.147494	0.0172907	-1200
0.0818545	0.00879365	-1200
0.198088	0.0349539	-1200
0.255584	0.0430165	-1200
0.178114	0.034347	-1200
0.095355	0.0201392	-1200
0.320329	0.057107	-1200
0.243797	0.0513687	-1200
0.167006	0.0397473	-1200
0.203517	0.0837155	-1200
0.0763822	0.0819568	-1200
0.150358	0.0970957	-1200
0.278253	0.130229	-1200
0.212335	0.127753	-1200
0.139331	0.121635	-1200
0.0726088	0.122366	-1200
0.222538	-0.433326	-1200
0.193415	-0.413554	-1200
0.1718	-0.338742	-1200
0.213591	-0.3361	-1200
0.169995	-0.323681	-1200
0.20614	-0.296488	-1200
0.235408	-0.274847	-1200
0.172661	-0.267394	-1200
0.222851	-0.242476	-1200
0.270779	-0.216373	-1200
0.204937	-0.220099	-1200
0.210443	-0.211899	-1200
0.244976	-0.205855	-1200
0.373286	-0.175758	-1200
0.124762	-0.216055	-1200
0.234292	-0.17425	-1200
0.19484	-0.187716	-1200
0.178827	-0.183491	-1200
0.262303	-0.157831	-1200
0.157447	-0.183703	-1200
0.300696	-0.160224	-1200
0.219424	-0.158198	-1200
0.111416	-0.175309	-1200
0.235529	-0.154927	-1200
0.150098	-0.157444	-1200
0.228073	-0.143754	-1200
0.280029	-0.13594	-1200
0.234648	-0.105607	-1200
0.0464983	-0.125777	-1200
0.177585	-0.096584	-1200
0.265672	-0.0777096	-1200
0.240163	-0.0787191	-1200
0.129667	-0.0906893	-1200
0.324222	-0.0501053	-1200
0.280347	-0.0545856	-1200
0.204788	-0.0633716	-1200
0.110468	-0.0746813	-1200
0.261119	-0.0508032	-1200
0.189146	-0.0523485	-1200
0.204851	-0.0403784	-1200
0.253813	-0.0267444	-1200
0.18621	-0.0324335	-1200
0.145121	-0.0341284	-1200
0.22675	-0.0214604	-1200
0.238643	-0.0130357	-1200
0.181474	-0.0203637	-1200
0.1122	-0.0184881	-1200
0.140973	-0.00510961	-1200
0.0802037	-0.0180456	-1200
0.11788	-0.00611284	-1200
-0.257297	0.155312	-1200
-0.0423751	-0.309419	-1200
-0.0932362	-0.302367	-1200
-0.0700507	-0.284803	-1200
-0.126611	-0.288935	-1200
-0.0677831	-0.251769	-1200
-0.0862636	-0.236715	-1200
-0.082083	-0.207453	-1200
-0.0883563	-0.212846	-1200
-0.0579985	-0.2055	-1200
-0.124933	-0.203002	-1200
-0.0962929	-0.190042	-1200
-0.0553813	-0.183308	-1200
0.118945	0.000619268	-1080
0.199204	0.0114122	-1080
0.155854	0.00861815	-1080
0.255915	0.0247191	-1080
0.239491	0.0242989	-1080
0.344135	0.0468948	-1080
0.105674	0.0161083	-1080
0.234603	0.041808	-1080
0.0479387	0.0206791	-1080
0.268385	0.0594866	-1080
0.339754	0.0621701	-1080
0.179082	0.0436289	-1080
0.15921	0.0448306	-1080
0.233205	0.054643	-1080
0.217869	0.0706261	-1080
0.340891	0.104413	-1080
0.180442	0.0868818	-1080
0.102868	0.0807481	-1080
0.237495	0.108114	-1080
0.343655	0.152591	-1080
0.206365	-0.396467	-1080
0.262185	-0.382012	-1080
0.202251	-0.344565	-1080
0.218963	-0.32703	-1080
0.302482	-0.281729	-1080
0.34525	-0.261616	-1080
0.246161	-0.268284	-1080
0.281667	-0.237243	-1080
0.254954	-0.248454	-1080
0.177721	-0.245254	-1080
0.299105	-0.225222	-1080
0.263172	-0.231609	-1080
0.146756	-0.240681	-1080
0.212352	-0.207305	-1080
0.152418	-0.207537	-1080
0.231257	-0.198133	-1080
0.273828	-0.182976	-1080
0.250163	-0.161169	-1080
0.292926	-0.154764	-1080
0.268177	-0.144506	-1080
0.217128	-0.150341	-1080
0.22963	-0.137398	-1080
0.152199	-0.147235	-1080
0.209641	-0.133854	-1080
0.187283	-0.114418	-1080
0.208222	-0.0893612	-1080
0.220361	-0.0826798	-1080
0.133293	-0.0908481	-1080
0.279425	-0.0722029	-1080
0.159926	-0.0769771	-1080
0.269853	-0.0468325	-1080
0.127525	-0.061519	-1080
0.177812	-0.0542855	-1080
0.143154	-0.052485	-1080
0.340101	-0.0257092	-1080
0.30483	-0.0337269	-1080
0.172326	-0.0446555	-1080
0.10679	-0.0474222	-1080
0.190677	-0.0339967	-1080
0.275786	-0.0210605	-1080
0.206301	-0.0265436	-1080
0.172145	-0.0296177	-1080
0.115866	-0.032698	-1080
0.14245	-0.0279175	-1080
0.274095	-0.00384572	-1080
0.168687	-0.0053953	-1080
-0.112608	-0.327125	-1080
-0.112875	-0.316675	-1080
-0.0896878	-0.28657	-1080
-0.143379	-0.290775	-1080
-0.116974	-0.283014	-1080
-0.172642	-0.266034	-1080
-0.135502	-0.255805	-1080
-0.0870639	-0.224151	-1080
-0.114366	-0.221443	-1080
-0.0780219	-0.209867	-1080
-0.116937	-0.199644	-1080
-0.099184	-0.189337	-1080
-0.108782	-0.183772	-1080
0.300351	0.0100441	-960
0.285009	0.0109421	-960
0.175156	0.0124622	-960
0.26992	0.0217623	-960
0.280196	0.0344617	-960
0.3212	0.0438003	-960
0.225872	0.0350967	-960
0.181234	0.02681	-960
0.198925	0.064081	-960
0.279735	0.0759788	-960
0.13204	0.0592514	-960
0.0963496	0.0569103	-960
0.235473	0.0782878	-960
0.2411	0.0858625	-960
0.0350164	0.0584689	-960
0.177194	0.0839384	-960
0.243127	0.0988763	-960
0.284424	0.115969	-960
0.191827	0.0997999	-960
0.111558	0.104559	-960
0.179836	0.115174	-960
0.146505	0.136115	-960
0.255896	-0.485727	-960
0.229005	-0.348129	-960
0.218952	-0.299905	-960
0.134667	-0.308238	-960
0.27971	-0.256372	-960
0.240341	-0.26002	-960
0.235221	-0.250549	-960
0.278307	-0.228361	-960
0.311475	-0.197614	-960
0.135768	-0.228059	-960
0.164667	-0.218519	-960
0.178621	-0.189702	-960
0.235102	-0.181753	-960
0.186106	-0.174458	-960
0.171716	-0.14595	-960
0.241744	-0.131856	-960
0.285445	-0.122938	-960
0.182825	-0.124548	-960
0.274446	-0.10014	-960
0.182736	-0.114819	-960
0.246012	-0.0958511	-960
0.137121	-0.10109	-960
0.096305	-0.105744	-960
0.249125	-0.0835435	-960
0.243687	-0.0719465	-960
0.294675	-0.068714	-960
0.208795	-0.0779651	-960
0.314816	-0.0598842	-960
0.218104	-0.0666826	-960
0.113546	-0.0732798	-960
0.174457	-0.0656009	-960
0.313507	-0.042734	-960
0.0966223	-0.0702296	-960
0.284285	-0.0452873	-960
0.340022	-0.0315269	-960
0.132982	-0.0543498	-960
0.22661	-0.0402687	-960
0.256823	-0.0271435	-960
0.112961	-0.0512745	-960
0.121244	-0.0503374	-960
0.327337	-0.0182005	-960
0.149876	-0.0438283	-960
0.232787	-0.0264014	-960
0.139471	-0.0338161	-960
0.293134	-0.00713805	-960
0.200492	-0.0171313	-960
0.0919379	-0.0338853	-960
0.265107	-0.00325143	-960
0.104335	-0.0189426	-960
0.0885275	-0.00794305	-960
0.129021	-0.00147163	-960
-0.290263	0.172284	-960
-0.0723002	-0.265638	-960
-0.0965859	-0.268473	-960
-0.129319	-0.258551	-960
-0.0482259	-0.235808	-960
-0.158448	-0.24845	-960
-0.135962	-0.225682	-960
-0.128494	-0.212083	-960
-0.110346	-0.181595	-960
-0.0682671	-0.171405	-960
-0.105193	-0.170064	-960
-0.0753378	-0.121381	-960
-0.0958793	-0.0956692	-960
0.206523	0.0126533	-840
0.236052	0.0332256	-840
0.190726	0.0354636	-840
0.246493	0.0380393	-840
0.221771	0.0434886	-840
0.234456	0.0471634	-840
0.269394	0.0632201	-840
0.226782	0.065862	-840
0.168327	0.0736155	-840
0.111477	0.0859907	-840
0.111817	0.0987499	-840
0.226641	0.099657	-840
0.166899	0.101286	-840
0.192143	0.10463	-840
0.313297	0.120885	-840
0.304933	0.125215	-840
0.284783	-0.350061	-840
0.183224	-0.29222	-840
0.293299	-0.288962	-840
0.281723	-0.278186	-840
0.210321	-0.267315	-840
0.322603	-0.259487	-840
0.299775	-0.26089	-840
0.239991	-0.256088	-840
0.255621	-0.229228	-840
0.321379	-0.232322	-840
0.342371	-0.202705	-840
0.171847	-0.200592	-840
0.229926	-0.181514	-840
0.348815	-0.182365	-840
0.202547	-0.181909	-840
0.188586	-0.177998	-840
0.196909	-0.173895	-840
0.264843	-0.167143	-840
0.370775	-0.164246	-840
0.24099	-0.159117	-840
0.192865	-0.138169	-840
0.265366	-0.139285	-840
0.252932	-0.136935	-840
0.289156	-0.115146	-840
0.235523	-0.113625	-840
0.194827	-0.108254	-840
0.170293	-0.104669	-840
0.181237	-0.101784	-840
0.143553	-0.0962944	-840
0.156834	-0.0941133	-840
0.355689	-0.0925522	-840
0.0495475	-0.0859751	-840
0.0325522	-0.084104	-840
0.143113	-0.0826049	-840
0.167526	-0.0799391	-840
0.303819	-0.0800744	-840
0.0554376	-0.0771212	-840
0.305184	-0.0627047	-840
0.328132	-0.0591766	-840
0.216749	-0.0594302	-840
0.132301	-0.052515	-840
0.077622	-0.0537718	-840
0.185024	-0.0533209	-840
0.151525	-0.0431989	-840
0.161866	-0.0413785	-840
0.250688	-0.0398456	-840
0.106816	-0.0371798	-840
0.201831	-0.0362499	-840
0.293362	-0.032812	-840
0.333258	-0.027024	-840
0.146398	-0.0158481	-840
0.120108	-0.00998112	-840
0.205754	-0.00543861	-840
0.156489	-0.00422126	-840
0.0929748	-0.000986277	-840
-0.13247	-0.337114	-840
-0.0566733	-0.320146	-840
-0.147599	-0.299646	-840
-0.0906754	-0.270922	-840
-0.0621847	-0.263183	-840
-0.0643941	-0.210775	-840
-0.120124	-0.207459	-840
-0.0541078	-0.20036	-840
-0.0482932	-0.195416	-840
-0.0972506	-0.187246	-840
-0.116745	-0.162569	-840
-0.0690968	-0.107156	-840
0.221951	0.0033008	-720
0.265393	0.0120479	-720
0.310646	0.0102475	-720
0.146186	0.0109602	-720
0.196248	0.0205175	-720
0.149966	0.0188671	-720
0.333251	0.0343583	-720
0.278792	0.0361963	-720
0.195715	0.0340958	-720
0.0932132	0.0366689	-720
0.243955	0.0425728	-720
0.116863	0.0403973	-720
0.269845	0.0552059	-720
0.297902	0.0624301	-720
0.0835507	0.0550183	-720
0.318999	0.0842454	-720
0.0988533	0.102317	-720
0.273708	0.110322	-720
0.177639	0.117253	-720
0.147204	0.114988	-720
0.225516	0.141934	-720
0.0835947	0.192129	-720
0.0913203	-0.371655	-720
0.216921	-0.348429	-720
0.251483	-0.325605	-720
0.273466	-0.305349	-720
0.30872	-0.300998	-720
0.218193	-0.293323	-720
0.175641	-0.288172	-720
0.188875	-0.27207	-720
0.30308	-0.26676	-720
0.332431	-0.242464	-720
0.286749	-0.241932	-720
0.23629	-0.240814	-720
0.325756	-0.225012	-720
0.336882	-0.21265	-720
0.240296	-0.221101	-720
0.276211	-0.212363	-720
0.420571	-0.202427	-720
0.243174	-0.200301	-720
0.216377	-0.164566	-720
0.0877766	-0.15909	-720
0.251197	-0.157312	-720
0.208778	-0.139622	-720
0.163844	-0.143954	-720
0.254983	-0.13664	-720
0.153262	-0.135992	-720
0.276613	-0.130273	-720
0.187065	-0.12602	-720
0.166188	-0.122323	-720
0.257305	-0.120593	-720
0.176252	-0.122653	-720
0.215463	-0.110401	-720
0.30757	-0.106875	-720
0.169803	-0.108097	-720
0.180896	-0.103178	-720
0.0368561	-0.0941344	-720
0.155783	-0.0976663	-720
0.308077	-0.0955582	-720
0.270192	-0.0947821	-720
0.240098	-0.0825975	-720
0.0624924	-0.0784178	-720
0.301259	-0.0794444	-720
0.319968	-0.0693008	-720
0.270005	-0.0701013	-720
0.223233	-0.0701746	-720
0.33932	-0.0673331	-720
0.1678	-0.0585094	-720
0.393564	-0.0509138	-720
0.284014	-0.0505105	-720
0.24088	-0.0458787	-720
0.15066	-0.051751	-720
0.121001	-0.0506022	-720
0.0975327	-0.0430372	-720
0.120148	-0.0344823	-720
0.218055	-0.0246075	-720
0.240489	-0.016181	-720
0.273009	-0.0102842	-720
0.0770412	-0.0126551	-720
0.163007	-0.00636729	-720
0.147793	-0.00696002	-720
0.0965037	-0.00588455	-720
0.170463	-0.00408802	-720
0.0793412	-0.000427745	-720
-0.166413	0.161916	-720
-0.0869775	-0.312813	-720
-0.0985398	-0.306659	-720
-0.105888	-0.283434	-720
-0.0760852	-0.275259	-720
-0.0464984	-0.233274	-720
-0.117373	-0.224445	-720
-0.0519417	-0.201329	-720
0.336331	0.0128745	-600
0.285373	0.0144754	-600
0.323283	0.0236264	-600
0.117017	0.00915706	-600
0.149318	0.0107216	-600
0.137512	0.015185	-600
0.19309	0.0290237	-600
0.105545	0.0214797	-600
0.152865	0.0283202	-600
0.181967	0.03906	-600
0.209505	0.0392238	-600
0.254735	0.0450697	-600
0.296326	0.0516252	-600
0.195492	0.0446634	-600
0.102589	0.0433293	-600
0.194584	0.0626925	-600
0.251224	0.0766889	-600
0.260715	0.0814069	-600
0.329166	0.0967132	-600
0.177404	0.081789	-600
0.107614	0.0774166	-600
0.222727	0.0953911	-600
0.228968	0.0984475	-600
0.260894	0.10222	-600
0.0861076	0.0845967	-600
0.243592	0.104748	-600
0.244187	0.114942	-600
0.0881607	0.100497	-600
0.302249	0.123099	-600
0.249525	0.118545	-600
0.228491	0.118636	-600
0.212636	0.125512	-600
0.0912455	0.11507	-600
0.188804	0.126301	-600
0.234394	0.150212	-600
0.124152	0.141377	-600
0.280548	0.174973	-600
0.504815	-0.191527	-600
0.222455	-0.346057	-600
0.335078	-0.31138	-600
0.353962	-0.300086	-600
0.399336	-0.281431	-600
0.406111	-0.266513	-600
0.213165	-0.280935	-600
0.275754	-0.267329	-600
0.25938	-0.245963	-600
0.322329	-0.215048	-600
0.310308	-0.206949	-600
0.296839	-0.197157	-600
0.309209	-0.180926	-600
0.331172	-0.169384	-600
0.336541	-0.153544	-600
0.254612	-0.161147	-600
0.369781	-0.124673	-600
0.256988	-0.140735	-600
0.299195	-0.105241	-600
0.235544	-0.104954	-600
0.377301	-0.069832	-600
0.247893	-0.0872198	-600
0.237504	-0.0851492	-600
0.00510199	-0.113145	-600
0.366614	-0.062033	-600
0.255967	-0.0759981	-600
0.163941	-0.0786827	-600
0.195333	-0.0735421	-600
0.144555	-0.0696687	-600
0.242765	-0.0581922	-600
0.0674859	-0.0724513	-600
0.116088	-0.0625359	-600
0.177245	-0.0446648	-600
0.423732	-0.00838689	-600
0.151895	-0.036598	-600
0.26516	-0.0073418	-600
0.137256	-0.0162186	-600
0.22128	-0.00346188	-600
0.205799	-0.00485316	-600
-0.31118	0.0856575	-600
-0.115162	-0.313293	-600
-0.0516483	-0.274537	-600
-0.0801413	-0.278099	-600
-0.0893492	-0.270968	-600
-0.00360453	-0.226031	-600
-0.139868	-0.188485	-600
-0.112012	-0.17697	-600
-0.0648151	-0.091332	-600
-0.107959	-0.0234378	-600
0.36654	0.0239726	-480
0.183323	0.0054695	-480
0.246291	0.0175247	-480
0.296743	0.0319897	-480
0.179474	0.0121143	-480
0.309276	0.0335721	-480
0.189913	0.0176035	-480
0.281214	0.0337231	-480
0.145691	0.0142811	-480
0.192377	0.0318256	-480
0.334912	0.0594685	-480
0.282189	0.0540319	-480
0.104205	0.0277743	-480
0.203725	0.0453187	-480
0.31925	0.063743	-480
0.220101	0.048871	-480
0.338949	0.0739532	-480
0.219287	0.0582998	-480
0.132461	0.0456864	-480
0.0921874	0.0359096	-480
0.201355	0.0609131	-480
0.257777	0.0659624	-480
0.142069	0.0485689	-480
0.292706	0.0756801	-480
0.237003	0.0710707	-480
0.0400793	0.0465991	-480
0.274314	0.0975712	-480
0.15319	0.075923	-480
0.256841	0.103074	-480
0.184718	0.0912087	-480
0.260557	0.117939	-480
0.245394	0.115753	-480
0.287649	0.123645	-480
0.0973434	0.099935	-480
0.122331	0.120441	-480
0.33145	0.162155	-480
0.120227	0.144919	-480
0.10498	0.146377	-480
0.335587	0.188163	-480
0.0407107	0.155274	-480
0.222422	0.186062	-480
0.192466	0.192523	-480
0.252859	0.209916	-480
0.23928	-0.450871	-480
0.286293	-0.446071	-480
0.29774	-0.438138	-480
0.274679	-0.379841	-480
0.243328	-0.359254	-480
0.269939	-0.335417	-480
0.346182	-0.321629	-480
0.314559	-0.319387	-480
0.21129	-0.314659	-480
0.30186	-0.288534	-480
0.23203	-0.295992	-480
0.306944	-0.279282	-480
0.298665	-0.264597	-480
0.468142	-0.224493	-480
0.307648	-0.25228	-480
0.367758	-0.234463	-480
0.327297	-0.237061	-480
0.387308	-0.228574	-480
0.37447	-0.197556	-480
0.242824	-0.204605	-480
0.370483	-0.175407	-480
0.310444	-0.183867	-480
0.375578	-0.177425	-480
0.390791	-0.160379	-480
0.26234	-0.179911	-480
0.257201	-0.156766	-480
0.337587	-0.143189	-480
0.291836	-0.125049	-480
0.254188	-0.141764	-480
0.36083	-0.102992	-480
0.400666	-0.0940898	-480
0.237314	-0.106203	-480
0.188207	-0.104007	-480
0.214746	-0.0935755	-480
0.145879	-0.0944195	-480
0.365172	-0.0541697	-480
0.240326	-0.0760948	-480
0.2206	-0.0774729	-480
0.250871	-0.0620693	-480
0.131176	-0.0757057	-480
0.205597	-0.058469	-480
0.185316	-0.0530355	-480
0.134022	-0.0622606	-480
0.223679	-0.0477801	-480
0.219791	-0.032548	-480
0.127919	-0.0517497	-480
0.0931012	-0.0584492	-480
0.0453405	-0.0582514	-480
0.252654	-0.0220108	-480
0.168768	-0.0268178	-480
0.336329	-0.000738528	-480
0.0712423	-0.0406256	-480
0.134892	-0.0253407	-480
0.218661	-0.00654784	-480
0.288995	-0.000303324	-480
0.264788	-0.0014309	-480
0.144938	-0.0200985	-480
0.157925	-0.020204	-480
0.142141	-0.0038443	-480
-0.0504393	0.0264598	-480
-0.0896749	-0.317356	-480
-0.094885	-0.303092	-480
-0.0667077	-0.241677	-480
-0.123437	-0.249535	-480
-0.127791	-0.225796	-480
-0.109793	-0.200112	-480
-0.166557	-0.191278	-480
-0.00907717	-0.161997	-480
-0.0767307	-0.14723	-480
-0.0912642	-0.0567086	-480
0.128197	0.0124306	-360
0.0990828	0.0327549	-360
0.0209008	0.0300218	-360
0.182843	0.041523	-360
0.106394	0.0571392	-360
0.39424	0.0814746	-360
0.160759	0.0771089	-360
0.213808	0.0879436	-360
0.164538	0.109662	-360
0.2552	-0.496256	-360
0.243976	-0.446103	-360
0.326368	-0.399691	-360
0.277267	-0.346083	-360
0.367604	-0.296397	-360
0.236183	-0.27025	-360
0.330427	-0.24447	-360
0.319657	-0.238069	-360
0.346888	-0.223665	-360
0.216022	-0.159455	-360
0.387983	-0.112469	-360
0.374819	-0.108555	-360
0.147046	-0.103987	-360
0.388353	-0.0496329	-360
0.191494	-0.057815	-360
0.158685	-0.0550476	-360
0.176054	-0.0289142	-360
-0.126976	0.00632452	-360
-0.392196	0.174147	-360
0.230533	0.0218497	-240
0.311189	0.021612	-240
0.163446	0.0223252	-240
0.239762	0.0245223	-240
0.28399	0.0320647	-240
0.19303	0.0289424	-240
0.111153	0.02936	-240
0.326914	0.0504324	-240
0.174511	0.0431341	-240
0.159201	0.0469246	-240
0.145431	0.0603133	-240
0.169135	0.0616046	-240
0.135664	0.0607887	-240
0.296075	0.0703419	-240
0.194492	0.0716589	-240
0.276738	0.0746463	-240
0.258018	0.0772611	-240
0.178028	0.0822658	-240
0.161766	0.0778457	-240
0.0337565	0.0730723	-240
0.275165	0.0890886	-240
0.190891	0.0878744	-240
0.202349	0.0950763	-240
0.168139	0.100621	-240
0.248274	0.106923	-240
0.267532	0.113617	-240
0.289338	0.12231	-240
0.0727154	0.113444	-240
0.0964144	0.125149	-240
0.124459	0.138744	-240
0.101634	0.143819	-240
0.293387	0.157914	-240
0.202914	0.162784	-240
0.316733	0.171656	-240
0.150913	0.165418	-240
0.229755	0.188964	-240
0.13077	0.209882	-240
0.266054	-0.488144	-240
0.26499	-0.471834	-240
0.30844	-0.374223	-240
0.38937	-0.321289	-240
0.30303	-0.319025	-240
0.294837	-0.319467	-240
0.200775	-0.310395	-240
0.378977	-0.296748	-240
0.316459	-0.269204	-240
0.215262	-0.275891	-240
0.308568	-0.257834	-240
0.220968	-0.246084	-240
0.300454	-0.244786	-240
0.240081	-0.22734	-240
0.309369	-0.224445	-240
0.310164	-0.204234	-240
0.282898	-0.192953	-240
0.423149	-0.181236	-240
0.278346	-0.179524	-240
0.231407	-0.167284	-240
0.276542	-0.15624	-240
0.00593595	-0.152972	-240
0.311021	-0.137497	-240
0.239353	-0.137144	-240
0.272074	-0.131884	-240
0.258494	-0.11259	-240
0.236307	-0.11244	-240
0.376373	-0.0929695	-240
0.381989	-0.0882667	-240
0.161508	-0.0803969	-240
0.26765	-0.0751368	-240
0.193557	-0.0774134	-240
0.240428	-0.0696048	-240
0.215783	-0.0763668	-240
0.320681	-0.0694145	-240
0.303982	-0.0639437	-240
0.337739	-0.0613205	-240
0.225684	-0.0496313	-240
0.0351453	-0.0516905	-240
0.0439148	-0.0235958	-240
0.133816	-0.0177308	-240
0.299877	-0.0083659	-240
0.121704	-0.00823677	-240
0.252793	-0.00080193	-240
-0.191433	0.0922138	-240
-0.0567947	-0.346232	-240
-0.0835565	-0.268795	-240
-0.0856758	-0.255637	-240
-0.0619029	-0.211471	-240
-0.0029313	-0.168961	-240
-0.152099	-0.100534	-240
0.277275	0.0133202	-120
0.0960063	0.0111069	-120
0.249877	0.0282066	-120
0.21022	0.0305628	-120
0.312222	0.0353093	-120
0.166113	0.030413	-120
0.188346	0.0348463	-120
0.136764	0.0382308	-120
0.172606	0.0408866	-120
0.146787	0.0479485	-120
0.0967147	0.0485342	-120
0.239562	0.0653751	-120
0.198258	0.0616841	-120
0.189272	0.0819504	-120
0.267071	0.0788246	-120
0.176552	0.0840069	-120
0.24764	0.0943239	-120
0.201706	0.109735	-120
0.190844	0.116368	-120
0.33015	0.122524	-120
0.152255	0.125098	-120
0.244645	0.127297	-120
0.163329	0.137506	-120
0.228663	0.140815	-120
0.115145	0.14343	-120
0.112281	0.157663	-120
0.288336	0.214948	-120
0.130488	0.248023	-120
0.286863	-0.435901	-120
0.274025	-0.376422	-120
0.29693	-0.345677	-120
0.31738	-0.320565	-120
0.323171	-0.306506	-120
0.210555	-0.298009	-120
0.306679	-0.278703	-120
0.35111	-0.261223	-120
0.280562	-0.223784	-120
0.266879	-0.226397	-120
0.331113	-0.217893	-120
0.217863	-0.215624	-120
0.34205	-0.198472	-120
0.310576	-0.200534	-120
0.333058	-0.182159	-120
0.239233	-0.167477	-120
0.319555	-0.158994	-120
0.280978	-0.15689	-120
0.303237	-0.138979	-120
0.259254	-0.138564	-120
0.249399	-0.122193	-120
0.334444	-0.10716	-120
0.257409	-0.0999306	-120
0.329249	-0.0890284	-120
0.0803656	-0.0931444	-120
0.174607	-0.0842609	-120
0.299763	-0.0775894	-120
0.370435	-0.0733874	-120
0.210164	-0.0731798	-120
[truncated: 311 more rows]
