# Supplementary material for: Spinal premotor interneurons controlling antagonistic muscles are spatially intermingled
Source: eLife. 2022 Dec 13;11:e81976. doi: 10.7554/eLife.81976 (PMC9844990; doi:10.7554/eLife.81976)
Supplement: Figure 12—figure supplement 14—source data 4. [file elife-81976-fig12-figsupp14-data4.xlsx]

## Sheet: Sheet1
0.389498	-0.181514	-5280
0.330166	-0.375364	-5280
-0.0979482	-0.234686	-5280
-0.105488	-0.292703	-5280
0.216218	0.0739587	-5160
0.278465	0.0490794	-5160
0.239435	0.0566934	-4800
0.381134	-0.0544494	-4800
0.373757	-0.284796	-4800
0.349865	-0.420825	-4800
-0.201163	0.430754	-4800
-0.05228	-0.236616	-4800
0.282096	0.047989	-4680
0.234939	0.0320308	-4680
0.403833	-0.0835048	-4680
0.38589	-0.11778	-4680
0.405703	-0.123847	-4680
0.340171	-0.305377	-4680
0.427234	-0.336326	-4680
0.369208	-0.387206	-4680
0.282377	-0.45069	-4680
-0.0650142	-0.167709	-4680
0.202287	0.156839	-4560
0.264655	0.10917	-4560
0.282234	0.070991	-4560
0.273845	-0.239478	-4560
0.352099	0.164582	-4440
0.281369	0.126009	-4320
-0.0384862	-0.239183	-4320
0.280861	0.0969551	-4200
0.141277	0.00587966	-4200
0.237762	-0.212103	-4200
0.262905	0.189292	-4080
0.158707	0.190156	-4080
0.17401	0.187999	-4080
0.110244	0.0773185	-4080
-0.0696621	-0.251883	-4080
0.154197	0.181902	-3960
0.201814	0.131221	-3960
0.226539	0.111058	-3960
0.244429	0.109744	-3960
0.079959	-0.0187565	-3960
0.199227	-0.0123046	-3960
0.0473334	-0.032355	-3960
0.418972	-0.0518843	-3960
0.43422	-0.106929	-3960
0.476883	-0.117593	-3960
0.405662	-0.257381	-3960
0.365938	-0.304429	-3960
0.40957	-0.415405	-3960
-0.50914	0.215495	-3960
0.128034	0.0410633	-3840
0.0357455	-0.0555169	-3840
0.422972	-0.0853629	-3840
0.0864078	-0.114404	-3840
0.424932	-0.11339	-3840
0.34824	-0.117045	-3840
0.417708	-0.117372	-3840
0.393458	-0.278498	-3840
0.130354	-0.506225	-3840
-0.0613003	-0.0851673	-3840
-0.45683	-0.150857	-3840
-0.458426	-0.226821	-3840
-0.0801925	-0.259996	-3840
-0.407414	-0.375971	-3840
0.216647	0.168286	-3720
0.220716	0.110581	-3720
0.246627	0.0899746	-3720
-0.0763918	-0.070019	-3720
-0.139788	-0.122839	-3720
-0.0541089	-0.149893	-3720
-0.307274	-0.369653	-3720
0.204388	0.166186	-3600
0.261151	-0.00587611	-3600
0.418538	-0.0792256	-3600
0.442007	-0.268136	-3600
-0.0772603	-0.0432545	-3600
-0.0727905	-0.166901	-3600
0.0120421	0.464024	-3480
0.164699	0.177253	-3480
0.23923	0.0850367	-3480
0.216197	-0.143313	-3480
0.350168	-0.369374	-3480
-0.342795	0.327726	-3480
-0.131556	-0.181166	-3480
-0.140621	-0.196881	-3480
-0.153006	-0.207492	-3480
-0.27029	-0.436732	-3480
0.303045	0.0337166	-3360
0.216024	-0.0430515	-3360
0.216387	-0.0704282	-3360
0.207594	-0.165086	-3360
-0.0570816	-0.212434	-3360
-0.0718058	-0.238658	-3360
0.213078	0.168936	-3240
0.212509	0.113823	-3240
0.246341	0.113466	-3240
0.224688	-0.000633703	-3240
0.447531	-0.0889134	-3240
-0.220797	0.167752	-3240
-0.0595458	-0.173138	-3240
-0.0818182	-0.231272	-3240
-0.050374	-0.340266	-3240
0.224368	0.0973256	-3120
0.232236	0.0768533	-3120
0.17885	-0.00683884	-3120
0.150182	-0.0156316	-3120
0.249664	-0.0728488	-3120
-0.0672697	-0.0495085	-3120
-0.207999	-0.0835904	-3120
-0.131638	-0.214957	-3120
-0.0183099	-0.356737	-3120
-0.0208179	-0.390988	-3120
0.245401	0.1684	-3000
0.266514	0.119889	-3000
0.247859	0.0818907	-3000
0.175343	0.0108068	-3000
0.227082	0.00129935	-3000
0.0727161	-0.0105476	-3000
0.397072	-0.119995	-3000
0.193483	-0.249467	-3000
-0.163841	-0.107972	-3000
-0.120508	-0.109314	-3000
-0.207468	-0.135835	-3000
-0.237262	-0.155716	-3000
-0.0895349	-0.161814	-3000
-0.161442	-0.17539	-3000
-0.0221483	-0.443275	-3000
0.304347	0.189401	-2880
0.297794	0.142053	-2880
0.540419	0.129301	-2880
0.238572	-0.185286	-2880
-0.0611393	-0.0509103	-2880
-0.0709237	-0.142015	-2880
-0.0610862	-0.171144	-2880
-0.0493579	-0.211205	-2880
-0.137476	-0.285835	-2880
0.227283	0.129978	-2760
0.226472	0.071025	-2760
0.0523373	-0.0382407	-2760
0.247131	-0.096728	-2760
0.178433	-0.17017	-2760
0.215397	-0.182573	-2760
0.124842	-0.39852	-2760
-0.0918149	-0.127413	-2760
-0.223951	-0.157827	-2760
-0.0606295	-0.1903	-2760
-0.109318	-0.219149	-2760
0.321575	0.208546	-2640
0.262678	0.152994	-2640
0.246809	0.145403	-2640
0.209483	0.13138	-2640
0.280052	0.114715	-2640
0.311736	0.11669	-2640
0.161259	0.0583885	-2640
0.262624	-0.0489923	-2640
0.474206	-0.0596633	-2640
0.213928	-0.205289	-2640
0.344604	-0.388023	-2640
-0.0970189	-0.151965	-2640
0.242595	0.139739	-2520
0.314798	0.116557	-2520
0.260737	0.103905	-2520
0.129923	0.0479361	-2520
0.283011	0.0347684	-2520
0.108736	-0.0420783	-2520
0.19985	-0.0342734	-2520
0.188244	-0.0379202	-2520
0.197582	-0.111989	-2520
0.159353	-0.11995	-2520
0.229152	-0.131876	-2520
0.24196	-0.167609	-2520
-0.136741	-0.129982	-2520
-0.0744114	-0.125307	-2520
-0.148006	-0.15882	-2520
-0.0723747	-0.170998	-2520
0.259663	0.111918	-2400
0.295881	0.125423	-2400
0.175979	0.0911046	-2400
0.292821	0.106369	-2400
0.257979	0.0841266	-2400
0.161361	0.0162719	-2400
0.293025	0.00366945	-2400
0.261551	0.00081961	-2400
0.100891	-0.0284157	-2400
0.159811	-0.00530549	-2400
0.315039	-0.045777	-2400
0.284147	-0.0601951	-2400
0.286028	-0.106714	-2400
0.148442	-0.171121	-2400
0.145902	-0.186678	-2400
0.297418	-0.175104	-2400
0.234428	-0.204429	-2400
0.293867	-0.204598	-2400
0.437425	-0.178063	-2400
-0.108682	0.0990034	-2400
-0.110987	-0.150165	-2400
-0.20918	-0.191061	-2400
-0.055469	-0.213061	-2400
0.218863	0.12247	-2280
0.311096	0.11405	-2280
0.0924551	0.0129439	-2280
0.282814	-0.0174039	-2280
0.254095	-0.0581975	-2280
0.165686	-0.0878498	-2280
0.185282	-0.0964168	-2280
0.318672	-0.093974	-2280
0.260216	-0.11171	-2280
0.246643	-0.117191	-2280
0.278129	-0.121647	-2280
-0.121886	-0.118255	-2280
-0.116778	-0.132749	-2280
-0.124461	-0.149295	-2280
-0.0693823	-0.183369	-2280
-0.0783897	-0.194419	-2280
-0.130496	-0.287085	-2280
0.237179	0.156671	-2160
0.297856	0.133855	-2160
0.273745	0.118139	-2160
0.14085	0.067945	-2160
0.319697	0.0948092	-2160
0.094736	0.0528945	-2160
0.11903	0.0303151	-2160
0.265159	0.0052336	-2160
0.198166	-0.0529549	-2160
0.275331	-0.096752	-2160
0.245114	-0.128616	-2160
0.252101	-0.162495	-2160
0.190387	-0.224579	-2160
-0.179823	-0.0732835	-2160
-0.176745	-0.0907626	-2160
-0.212589	-0.166946	-2160
-0.106374	-0.216798	-2160
0.235008	0.191192	-2040
0.316821	0.203046	-2040
0.259757	0.160895	-2040
0.177368	0.123253	-2040
0.313588	0.15027	-2040
0.27784	0.146219	-2040
0.267119	0.124416	-2040
0.156091	0.0779675	-2040
0.185843	0.0108213	-2040
0.0660557	-0.00683039	-2040
0.164354	-0.0200487	-2040
0.123524	-0.0477894	-2040
0.26633	-0.0294793	-2040
0.178435	-0.0566845	-2040
0.28866	-0.0361312	-2040
0.253959	-0.0817396	-2040
0.33717	-0.0792092	-2040
0.242039	-0.167213	-2040
-0.128046	-0.114369	-2040
-0.164978	-0.139851	-2040
-0.116308	-0.141562	-2040
-0.134063	-0.159063	-2040
-0.107902	-0.177224	-2040
-0.0811079	-0.187277	-2040
-0.0985469	-0.217547	-2040
0.257285	0.175276	-1920
0.123472	0.147099	-1920
0.312977	0.155179	-1920
0.18304	0.106102	-1920
0.282766	0.117135	-1920
0.321545	0.109165	-1920
0.335507	0.0794709	-1920
0.246634	0.0690284	-1920
0.127424	0.0643759	-1920
0.242854	0.0284325	-1920
0.294297	0.0101071	-1920
0.241309	-0.0107423	-1920
0.25398	-0.0266942	-1920
0.202328	-0.0421367	-1920
0.287078	-0.0455093	-1920
0.284311	-0.0701584	-1920
0.187048	-0.0830678	-1920
0.241879	-0.103196	-1920
0.266017	-0.151468	-1920
0.30308	-0.18983	-1920
0.239903	-0.193992	-1920
0.301763	-0.275812	-1920
-0.131729	-0.10345	-1920
-0.148161	-0.105773	-1920
-0.0451145	-0.126464	-1920
-0.157936	-0.144188	-1920
-0.104326	-0.172204	-1920
-0.146598	-0.188208	-1920
-0.0831363	-0.197517	-1920
-0.106342	-0.216381	-1920
0.307225	0.157968	-1800
0.260254	0.133184	-1800
0.173714	0.112814	-1800
0.313758	0.137147	-1800
0.282993	0.121759	-1800
0.161758	0.0677727	-1800
0.22751	0.0551246	-1800
0.167519	0.00800343	-1800
0.273054	0.0187473	-1800
0.0610103	-0.00918576	-1800
0.23612	-0.0513326	-1800
0.192827	-0.0605184	-1800
0.34593	-0.110471	-1800
0.317092	-0.134714	-1800
0.30884	-0.15105	-1800
0.320083	-0.197455	-1800
0.19515	-0.227398	-1800
-0.136319	-0.135668	-1800
-0.0867616	-0.14202	-1800
-0.0580572	-0.17319	-1800
-0.0828202	-0.196348	-1800
-0.043746	-0.190132	-1800
-0.116656	-0.214471	-1800
-0.0940715	-0.223488	-1800
-0.0469508	-0.228476	-1800
-0.0953056	-0.290896	-1800
0.194443	0.234306	-1680
0.233936	0.147179	-1680
0.281831	0.142396	-1680
0.306067	0.124628	-1680
0.261632	0.0891554	-1680
0.127382	0.0688721	-1680
0.181188	0.0712345	-1680
0.290169	0.0737056	-1680
0.134206	0.0456031	-1680
0.156731	0.0486974	-1680
0.185522	0.0335302	-1680
0.128091	0.0252545	-1680
0.200646	0.027443	-1680
0.270838	0.0104786	-1680
0.29335	0.00493496	-1680
0.160177	-0.00459122	-1680
0.0750008	-0.0127158	-1680
0.0341137	-0.0256979	-1680
0.162021	-0.0200632	-1680
0.234513	-0.0589878	-1680
0.225547	-0.0799721	-1680
0.184267	-0.0964515	-1680
0.262018	-0.0844625	-1680
0.228025	-0.123869	-1680
0.301467	-0.116839	-1680
0.328655	-0.142213	-1680
0.235039	-0.187887	-1680
0.326837	-0.189586	-1680
0.271902	-0.198955	-1680
0.334389	-0.206209	-1680
0.292774	-0.218018	-1680
0.310306	-0.21958	-1680
0.276775	-0.277639	-1680
-0.388624	-0.00172966	-1680
-0.0848977	-0.127926	-1680
-0.063988	-0.12974	-1680
-0.0687543	-0.181661	-1680
-0.0979904	-0.199673	-1680
-0.11072	-0.25127	-1680
-0.159396	-0.258527	-1680
0.210654	0.20318	-1560
0.336937	0.200687	-1560
0.290455	0.165824	-1560
0.276572	0.151721	-1560
0.374806	0.153819	-1560
0.207415	0.134081	-1560
0.322951	0.109868	-1560
0.220398	0.10709	-1560
0.258556	0.0999837	-1560
0.151806	0.0791619	-1560
0.115254	0.0744944	-1560
0.275807	0.0856793	-1560
0.271449	0.0537499	-1560
0.151664	0.0277264	-1560
0.297454	0.018879	-1560
0.263415	0.00212863	-1560
0.0666315	-0.011299	-1560
0.286881	-0.00555222	-1560
0.128365	-0.014225	-1560
0.158034	-0.0594939	-1560
0.281894	-0.0519477	-1560
0.21399	-0.064495	-1560
0.296053	-0.0599154	-1560
0.329565	-0.0519802	-1560
0.312815	-0.0672427	-1560
0.279394	-0.0784606	-1560
0.323311	-0.0852368	-1560
0.371432	-0.103109	-1560
0.336603	-0.14255	-1560
0.347008	-0.154149	-1560
0.236337	-0.191086	-1560
-0.220071	0.16497	-1560
-0.110095	-0.0866781	-1560
-0.194927	-0.1406	-1560
-0.147757	-0.172163	-1560
-0.0230112	-0.172414	-1560
-0.21087	-0.208437	-1560
0.164464	0.187322	-1440
0.342021	0.211412	-1440
0.208346	0.16777	-1440
0.315781	0.170251	-1440
0.279591	0.152756	-1440
0.257459	0.118371	-1440
0.269857	0.11223	-1440
0.240729	0.0927381	-1440
0.197963	0.0496857	-1440
0.209127	0.0280763	-1440
0.0650359	-0.0319319	-1440
0.22587	-0.0153785	-1440
0.281205	-0.0169342	-1440
0.219385	-0.0588969	-1440
0.314849	-0.0430404	-1440
0.228797	-0.0796474	-1440
0.225076	-0.103687	-1440
0.326735	-0.0957632	-1440
0.363398	-0.099304	-1440
0.29191	-0.128902	-1440
0.318951	-0.126391	-1440
0.277097	-0.160534	-1440
0.328573	-0.181301	-1440
0.298329	-0.194727	-1440
0.319456	-0.214424	-1440
0.360024	-0.218548	-1440
0.342861	-0.22862	-1440
0.320106	-0.25774	-1440
0.399667	-0.396033	-1440
-0.124764	-0.0390564	-1440
-0.20105	-0.101443	-1440
-0.133717	-0.115568	-1440
-0.176205	-0.138076	-1440
-0.120517	-0.197231	-1440
-0.0903667	-0.20737	-1440
-0.148459	-0.262115	-1440
-0.0750863	-0.267992	-1440
0.144882	0.198248	-1320
0.252879	0.152009	-1320
0.292787	0.144242	-1320
0.27879	0.142516	-1320
0.286932	0.134756	-1320
0.206098	0.123107	-1320
0.289752	0.120513	-1320
0.21081	0.0986729	-1320
0.295804	0.108096	-1320
0.333274	0.0950434	-1320
0.227062	0.0676848	-1320
0.195784	0.0486846	-1320
0.16142	0.0351039	-1320
0.144698	0.0221928	-1320
0.263402	0.0308331	-1320
0.313961	0.0357664	-1320
0.143313	-0.000775063	-1320
0.283325	-0.0674598	-1320
0.333509	-0.0540643	-1320
0.31861	-0.0563676	-1320
0.0608666	-0.103573	-1320
0.148896	-0.0996688	-1320
0.27047	-0.122891	-1320
0.310328	-0.122804	-1320
0.212074	-0.14308	-1320
0.335338	-0.131629	-1320
0.368236	-0.150048	-1320
0.3361	-0.1622	-1320
0.248782	-0.198387	-1320
0.299316	-0.201758	-1320
0.284849	-0.205735	-1320
0.246559	-0.21236	-1320
0.242952	-0.252422	-1320
-0.0051906	0.0758082	-1320
-0.18673	-0.116717	-1320
-0.113889	-0.161208	-1320
-0.190645	-0.18982	-1320
-0.150814	-0.186554	-1320
-0.196594	-0.209235	-1320
-0.163211	-0.218447	-1320
-0.0877981	-0.202872	-1320
-0.143	-0.239498	-1320
-0.141656	-0.291528	-1320
-0.0940854	-0.295963	-1320
0.13324	0.206179	-1200
0.34836	0.252357	-1200
0.324807	0.22039	-1200
0.168107	0.15687	-1200
0.235724	0.168754	-1200
0.262872	0.167819	-1200
0.13846	0.130558	-1200
0.180665	0.132317	-1200
0.224471	0.12759	-1200
0.323188	0.158922	-1200
0.299789	0.147332	-1200
0.199632	0.107489	-1200
0.217798	0.110712	-1200
0.249526	0.112437	-1200
0.289958	0.120249	-1200
0.275289	0.11283	-1200
0.136743	0.0525645	-1200
0.184014	0.0750847	-1200
0.242902	0.09482	-1200
0.256655	0.0941336	-1200
0.217423	0.0771831	-1200
0.14943	0.0522246	-1200
0.174435	0.0467334	-1200
0.322751	0.0763005	-1200
0.291559	0.0582256	-1200
0.235823	0.0296913	-1200
0.223763	0.0272399	-1200
0.255436	0.0245205	-1200
0.297229	0.0375031	-1200
0.378691	0.0590362	-1200
0.318362	0.017637	-1200
0.342814	0.0234223	-1200
0.268831	-0.00373715	-1200
0.217367	-0.0471076	-1200
0.218623	-0.075732	-1200
0.281685	-0.0504151	-1200
0.225967	-0.103076	-1200
0.341835	-0.0557654	-1200
0.29806	-0.0901942	-1200
0.324506	-0.103408	-1200
0.306253	-0.129187	-1200
0.217176	-0.183842	-1200
0.294003	-0.155428	-1200
0.269773	-0.179813	-1200
0.339262	-0.163202	-1200
0.304579	-0.192524	-1200
-0.356293	0.456797	-1200
-0.0853737	-0.165826	-1200
-0.109659	-0.190256	-1200
-0.154633	-0.213062	-1200
-0.0678322	-0.180396	-1200
-0.0869471	-0.200439	-1200
-0.134881	-0.243678	-1200
-0.0758162	-0.248252	-1200
0.246878	0.257881	-1080
0.250711	0.173276	-1080
0.272952	0.164215	-1080
0.201729	0.126962	-1080
0.140011	0.106883	-1080
0.104918	0.0967329	-1080
0.294326	0.112406	-1080
0.190919	0.0992851	-1080
0.109079	0.0665774	-1080
0.240995	0.0882158	-1080
0.269575	0.0858107	-1080
0.205129	0.0776467	-1080
0.177814	0.0651211	-1080
0.0573107	0.00877451	-1080
0.267866	0.0406731	-1080
0.290305	0.044255	-1080
0.317866	0.0167841	-1080
0.102729	-0.00112545	-1080
0.181566	-0.00540355	-1080
0.0380784	-0.035581	-1080
0.151541	-0.0336027	-1080
0.270833	-0.007983	-1080
0.0581653	-0.0888196	-1080
0.299266	-0.0591245	-1080
0.314466	-0.0656745	-1080
0.332709	-0.076922	-1080
0.194161	-0.111902	-1080
0.267766	-0.108553	-1080
0.22085	-0.120081	-1080
0.226837	-0.136326	-1080
0.305107	-0.124191	-1080
0.230788	-0.145491	-1080
0.21179	-0.155312	-1080
0.251993	-0.170565	-1080
0.368604	-0.158094	-1080
0.235658	-0.186342	-1080
0.300044	-0.176059	-1080
0.344971	-0.20414	-1080
0.324094	-0.217351	-1080
0.342436	-0.228962	-1080
0.316895	-0.235366	-1080
0.299289	-0.2541	-1080
0.264067	-0.269807	-1080
0.346182	-0.27268	-1080
-0.237709	0.117469	-1080
-0.104436	0.0154298	-1080
-0.200059	-0.0976631	-1080
-0.0544865	-0.151345	-1080
-0.125099	-0.171257	-1080
-0.0795182	-0.183575	-1080
-0.136287	-0.217317	-1080
-0.0882289	-0.207091	-1080
-0.0869985	-0.229411	-1080
-0.111407	-0.25565	-1080
-0.13904	-0.278788	-1080
-0.0922509	-0.275905	-1080
0.198749	0.319293	-960
0.223538	0.165494	-960
0.363466	0.147426	-960
0.187389	0.115307	-960
0.235177	0.119194	-960
0.203534	0.112284	-960
0.0739925	0.0872642	-960
0.306677	0.123429	-960
0.226557	0.105591	-960
0.164783	0.0947452	-960
0.154107	0.0888036	-960
0.301783	0.09983	-960
0.346184	0.113552	-960
0.321473	0.106775	-960
0.17318	0.0399055	-960
0.112725	0.0318255	-960
0.188611	0.0306901	-960
0.198876	0.0300563	-960
0.282674	0.0316444	-960
0.184231	0.012538	-960
0.14738	0.0055585	-960
0.283733	0.00643615	-960
0.249791	0.00561422	-960
0.326058	-0.0110978	-960
0.0630679	-0.0405238	-960
0.329476	-0.00139303	-960
0.299025	-0.0109054	-960
0.174825	-0.0494988	-960
0.206498	-0.0485967	-960
0.201949	-0.0596679	-960
0.228474	-0.0596679	-960
0.257552	-0.0613462	-960
0.323651	-0.0509715	-960
0.0234826	-0.0955483	-960
0.340304	-0.0848021	-960
0.222964	-0.104159	-960
0.328853	-0.0907324	-960
0.310427	-0.094341	-960
0.365916	-0.119482	-960
0.266166	-0.134175	-960
0.317009	-0.139986	-960
0.34726	-0.18847	-960
0.284344	-0.203514	-960
0.305776	-0.21241	-960
0.290665	-0.220715	-960
0.327093	-0.22898	-960
0.364107	-0.228065	-960
0.245708	-0.256284	-960
0.344339	-0.256867	-960
0.451517	-0.243906	-960
0.262779	-0.369596	-960
-0.0656201	-0.143334	-960
-0.0701695	-0.17175	-960
-0.166066	-0.194257	-960
-0.118494	-0.192344	-960
-0.0511334	-0.181407	-960
-0.0741476	-0.200362	-960
-0.131438	-0.215908	-960
-0.110463	-0.219891	-960
-0.122616	-0.240126	-960
0.152293	0.186594	-840
0.251287	0.144419	-840
0.278662	0.145178	-840
0.33167	0.141932	-840
0.224676	0.100414	-840
0.101562	0.0810543	-840
0.313771	0.115364	-840
0.207755	0.0583762	-840
0.302876	0.0777433	-840
0.0696702	0.02917	-840
0.261602	0.0337606	-840
0.186803	0.00772084	-840
0.257243	0.00207479	-840
0.293097	0.00318087	-840
0.339846	6.50632e-05	-840
0.0733231	-0.000177895	-840
0.180935	-0.0161387	-840
0.063828	-0.0267484	-840
0.122767	-0.0175618	-840
0.160135	-0.017021	-840
0.1972	-0.0123886	-840
0.251678	-0.0172203	-840
0.106799	-0.0501167	-840
0.190809	-0.0447514	-840
0.21342	-0.0416418	-840
0.267022	-0.0295591	-840
0.274504	-0.0344406	-840
0.184159	-0.0576879	-840
0.28099	-0.0624128	-840
0.276996	-0.0755059	-840
0.167169	-0.108445	-840
0.341947	-0.0854538	-840
0.363909	-0.0761037	-840
0.196096	-0.113746	-840
0.308775	-0.109107	-840
0.339323	-0.108196	-840
0.234638	-0.134517	-840
0.336244	-0.125004	-840
0.285595	-0.159771	-840
0.359568	-0.152207	-840
0.296958	-0.179767	-840
0.363738	-0.180286	-840
0.347827	-0.183609	-840
0.322528	-0.202829	-840
0.280113	-0.208728	-840
0.238675	-0.225778	-840
0.368041	-0.219751	-840
0.274725	-0.261335	-840
0.401599	-0.265605	-840
-0.144991	0.0378377	-840
-0.0102736	-0.0387883	-840
-0.199302	-0.138782	-840
-0.0334521	-0.104146	-840
-0.0560786	-0.110185	-840
-0.107057	-0.152067	-840
-0.0612405	-0.159327	-840
-0.133691	-0.19144	-840
-0.0527061	-0.172405	-840
-0.0653935	-0.187651	-840
-0.145364	-0.209846	-840
-0.0793016	-0.211045	-840
-0.144768	-0.22433	-840
-0.132431	-0.249841	-840
-0.131991	-0.263503	-840
0.280803	0.397228	-720
0.0994441	0.190755	-720
0.335397	0.163685	-720
0.21256	0.111971	-720
0.301529	0.127884	-720
0.292695	0.116873	-720
0.15433	0.0774337	-720
0.168556	0.0780221	-720
0.0639211	0.0575687	-720
0.312243	0.0787048	-720
0.217614	0.0681222	-720
0.266119	0.0816246	-720
0.279767	0.0693497	-720
0.204156	0.0561814	-720
0.230548	0.0398536	-720
0.0805338	0.00137276	-720
0.154806	0.0026293	-720
0.225477	0.00445239	-720
0.261113	0.00586872	-720
0.284969	0.00138728	-720
0.0671532	-0.00339118	-720
0.048475	-0.0130887	-720
0.0387431	-0.0377194	-720
0.323772	-0.000661048	-720
0.222149	-0.0123682	-720
0.0636413	-0.0417782	-720
0.281243	-0.0248157	-720
0.0475703	-0.0613585	-720
0.119467	-0.0569691	-720
0.153353	-0.0495455	-720
0.384122	-0.0210412	-720
0.297011	-0.0387705	-720
0.225655	-0.0574384	-720
0.212626	-0.0786647	-720
0.294076	-0.0746125	-720
0.170115	-0.0888713	-720
0.153359	-0.098701	-720
0.1999	-0.098311	-720
0.237982	-0.0999438	-720
0.327623	-0.100188	-720
0.266869	-0.0988994	-720
0.272749	-0.111453	-720
0.22028	-0.133294	-720
0.252786	-0.137511	-720
0.299326	-0.134933	-720
0.192317	-0.165738	-720
0.225941	-0.165368	-720
0.321683	-0.152715	-720
0.281023	-0.15727	-720
0.347944	-0.159683	-720
0.298011	-0.164687	-720
0.238637	-0.176546	-720
0.323611	-0.189079	-720
0.244	-0.199068	-720
0.282291	-0.20039	-720
0.254762	-0.203907	-720
0.353182	-0.188465	-720
0.310362	-0.201864	-720
0.244536	-0.232299	-720
0.255827	-0.239392	-720
0.207245	-0.246128	-720
0.349676	-0.229747	-720
0.19215	-0.254973	-720
0.352307	-0.248323	-720
0.302034	-0.270679	-720
0.259934	-0.299157	-720
0.276779	-0.307473	-720
0.385943	-0.304697	-720
0.365813	-0.313621	-720
0.218828	-0.335191	-720
0.261178	-0.36868	-720
-0.181188	0.0442107	-720
-0.15346	-0.0366466	-720
-0.0893106	-0.113398	-720
-0.135828	-0.129972	-720
-0.0964241	-0.14803	-720
-0.0816848	-0.151043	-720
-0.0599442	-0.158638	-720
-0.0498476	-0.156822	-720
-0.119504	-0.173543	-720
-0.0518808	-0.172339	-720
-0.16298	-0.19851	-720
-0.0588929	-0.191879	-720
-0.0716577	-0.191148	-720
-0.0941027	-0.196442	-720
-0.115891	-0.212983	-720
-0.105368	-0.227382	-720
-0.151347	-0.290479	-720
0.214579	0.226027	-600
0.226393	0.228088	-600
0.268296	0.224804	-600
0.192245	0.19906	-600
0.27325	0.215721	-600
0.0996002	0.139431	-600
0.192263	0.15783	-600
0.273917	0.153034	-600
0.243863	0.151324	-600
0.0861635	0.101746	-600
0.248931	0.128122	-600
0.125097	0.0964555	-600
0.109845	0.0898941	-600
0.146109	0.0666167	-600
0.232639	0.084329	-600
0.287456	0.09526	-600
0.190904	0.0747308	-600
0.0634984	0.04426	-600
0.117251	0.0242805	-600
0.187832	0.0342222	-600
0.337981	0.0688359	-600
0.268795	0.0474273	-600
0.101975	0.0101684	-600
0.201539	0.0302098	-600
0.129167	0.00719345	-600
0.30239	0.00966685	-600
0.0817507	-0.0153829	-600
0.156546	-0.0112943	-600
0.0677849	-0.044003	-600
0.244392	-0.00770492	-600
0.233811	-0.0128528	-600
0.258935	-0.00776564	-600
0.151646	-0.0370605	-600
0.209806	-0.0273518	-600
0.332287	-0.0169684	-600
0.25807	-0.0391521	-600
0.209433	-0.043497	-600
0.21117	-0.059703	-600
0.274109	-0.0483548	-600
0.325512	-0.0444011	-600
0.149584	-0.0935925	-600
0.32479	-0.0622398	-600
0.292903	-0.0683795	-600
0.232068	-0.0994555	-600
0.31775	-0.0969524	-600
0.287594	-0.0973168	-600
0.338522	-0.113725	-600
0.267677	-0.131571	-600
0.198635	-0.156291	-600
0.265765	-0.141205	-600
0.187333	-0.177685	-600
0.314035	-0.167572	-600
0.231845	-0.17836	-600
0.363153	-0.165352	-600
0.284871	-0.184979	-600
0.190748	-0.200038	-600
0.23811	-0.193844	-600
0.163369	-0.212054	-600
0.180936	-0.216244	-600
0.150263	-0.217924	-600
0.247038	-0.201866	-600
0.298969	-0.209902	-600
0.201762	-0.228854	-600
0.273364	-0.223058	-600
0.245583	-0.229495	-600
0.324568	-0.221027	-600
0.190032	-0.245228	-600
0.305504	-0.236167	-600
0.269023	-0.255645	-600
0.204437	-0.272249	-600
0.24732	-0.266204	-600
0.2382	-0.27397	-600
0.265188	-0.281918	-600
0.204407	-0.306692	-600
0.358049	-0.27704	-600
0.250206	-0.307097	-600
0.372086	-0.354858	-600
-0.283821	0.187133	-600
-0.1537	-0.0101942	-600
-0.220665	-0.114745	-600
-0.184395	-0.111846	-600
-0.157659	-0.114296	-600
-0.0801271	-0.143747	-600
-0.140501	-0.156971	-600
-0.0558739	-0.150331	-600
-0.0944394	-0.168593	-600
-0.104231	-0.179022	-600
-0.142181	-0.191784	-600
-0.149254	-0.211517	-600
-0.1537	-0.23978	-600
0.25309	0.188273	-480
0.291261	0.123132	-480
0.210189	0.0386589	-480
0.180969	0.0374548	-480
0.137027	0.018252	-480
0.127734	0.00302375	-480
0.253448	0.0400613	-480
0.227167	0.000670425	-480
0.118509	-0.0172396	-480
0.135012	-0.0101833	-480
0.15626	-0.0123862	-480
0.0474631	-0.0478302	-480
0.121846	-0.0260802	-480
0.0780211	-0.0421399	-480
0.191924	-0.0327296	-480
0.306324	-0.00698069	-480
0.128837	-0.0576648	-480
0.199391	-0.0508236	-480
0.320246	-0.0223487	-480
0.283127	-0.0400939	-480
0.0247363	-0.105431	-480
0.232753	-0.0569034	-480
0.328027	-0.0384258	-480
0.321864	-0.0444823	-480
0.160476	-0.0849889	-480
0.311597	-0.0651686	-480
0.24541	-0.0859363	-480
0.214656	-0.0893017	-480
0.172701	-0.104309	-480
0.184036	-0.105803	-480
0.310287	-0.0814666	-480
0.267375	-0.0923939	-480
0.0924184	-0.139021	-480
0.20772	-0.11018	-480
0.210015	-0.132058	-480
0.326504	-0.101862	-480
0.352819	-0.110075	-480
0.124404	-0.159992	-480
0.0750991	-0.176895	-480
0.272279	-0.135388	-480
0.187792	-0.157632	-480
0.114166	-0.189013	-480
0.321567	-0.144368	-480
0.267095	-0.158184	-480
0.247414	-0.159574	-480
0.298991	-0.153215	-480
0.271691	-0.166432	-480
0.137603	-0.203201	-480
0.169678	-0.193512	-480
0.303335	-0.169216	-480
0.246054	-0.194465	-480
0.182178	-0.20988	-480
0.298376	-0.189118	-480
0.229809	-0.204986	-480
0.3621	-0.186694	-480
0.238771	-0.205067	-480
0.266306	-0.203225	-480
0.258956	-0.219482	-480
0.184137	-0.240941	-480
0.234987	-0.238971	-480
0.253431	-0.237326	-480
0.356698	-0.216616	-480
0.272424	-0.255118	-480
0.245701	-0.268103	-480
0.214298	-0.287807	-480
0.269027	-0.278809	-480
0.308211	-0.281361	-480
0.233218	-0.307214	-480
0.296987	-0.303965	-480
0.364591	-0.279664	-480
0.377354	-0.279524	-480
0.46376	-0.283	-480
0.241122	-0.354458	-480
0.291524	-0.345623	-480
0.283849	-0.441498	-480
-0.273685	0.133428	-480
-0.211682	0.0090467	-480
-0.151788	-0.170109	-480
-0.0735069	-0.204233	-480
-0.0790163	-0.234494	-480
-0.0937197	-0.246462	-480
0.229875	0.203096	-360
0.215439	0.0615225	-360
0.129962	0.00114525	-360
0.24476	0.010103	-360
0.284356	0.00445699	-360
0.143504	-0.00515407	-360
0.0549654	-0.0323547	-360
0.0440646	-0.046625	-360
0.341138	-0.0215505	-360
0.282438	-0.0596391	-360
0.326588	-0.0517856	-360
0.127646	-0.0714484	-360
0.348424	-0.0761192	-360
0.210896	-0.102353	-360
0.270376	-0.114929	-360
0.207595	-0.141415	-360
0.258712	-0.143251	-360
0.368501	-0.146163	-360
0.236802	-0.163532	-360
0.344137	-0.160556	-360
0.393291	-0.15066	-360
0.277292	-0.16542	-360
0.22815	-0.172352	-360
0.229544	-0.180644	-360
0.309477	-0.182763	-360
0.331091	-0.177867	-360
0.377774	-0.1846	-360
0.274867	-0.198329	-360
0.238408	-0.198032	-360
0.292809	-0.195887	-360
0.323081	-0.20624	-360
0.243849	-0.225027	-360
0.403549	-0.20425	-360
0.35649	-0.217399	-360
0.195533	-0.232771	-360
0.333811	-0.23319	-360
0.383921	-0.229859	-360
0.189476	-0.250623	-360
0.198441	-0.252073	-360
0.13475	-0.255951	-360
0.478648	-0.229073	-360
0.233159	-0.2536	-360
0.219076	-0.255938	-360
0.270609	-0.256853	-360
0.184512	-0.269545	-360
0.225645	-0.278365	-360
0.219976	-0.287346	-360
0.184968	-0.295444	-360
0.332349	-0.292036	-360
0.314429	-0.288841	-360
0.269818	-0.294484	-360
0.284094	-0.303246	-360
0.293561	-0.308297	-360
0.344433	-0.300959	-360
0.270433	-0.308916	-360
0.361926	-0.30315	-360
0.341661	-0.311751	-360
0.132689	-0.335356	-360
0.369753	-0.31791	-360
0.236973	-0.327696	-360
0.389158	-0.316918	-360
0.242147	-0.352629	-360
0.2834	-0.34435	-360
0.342805	-0.344711	-360
0.055973	-0.372987	-360
0.30116	-0.378882	-360
-0.101595	-0.27029	-360
0.158313	0.265782	-240
0.243316	0.215087	-240
0.105969	0.156324	-240
0.121626	0.15271	-240
0.123703	0.105171	-240
0.119844	0.0889395	-240
0.221976	0.105582	-240
0.230272	0.0904503	-240
0.265141	0.0930922	-240
0.297997	0.101255	-240
0.159922	0.0644266	-240
0.221399	0.0751999	-240
0.335889	0.10597	-240
0.206324	0.0630661	-240
0.126525	0.0345823	-240
0.207155	0.0365598	-240
0.120375	0.00292668	-240
0.247534	0.0290216	-240
0.202967	0.017038	-240
0.28831	0.0391147	-240
0.217315	0.0077122	-240
0.288512	0.00940493	-240
0.0672574	-0.00802825	-240
0.0452537	-0.0395357	-240
0.191192	-0.00669474	-240
0.156899	-0.0188664	-240
0.0504806	-0.051789	-240
0.229643	-0.0277587	-240
0.0617132	-0.0689885	-240
0.192617	-0.0563678	-240
0.128567	-0.072227	-240
0.235638	-0.0584225	-240
0.0945862	-0.106789	-240
0.279882	-0.0714446	-240
0.252876	-0.0880998	-240
0.280949	-0.0977065	-240
0.327974	-0.0932501	-240
0.315449	-0.0958219	-240
0.265834	-0.122084	-240
0.376077	-0.0999857	-240
0.354702	-0.109735	-240
0.207011	-0.180445	-240
0.27436	-0.173281	-240
0.348489	-0.163096	-240
0.348178	-0.178445	-240
0.275318	-0.198257	-240
0.303582	-0.209483	-240
0.33196	-0.211748	-240
0.203849	-0.243365	-240
0.35142	-0.220267	-240
0.262187	-0.240881	-240
0.139119	-0.276131	-240
0.188849	-0.277424	-240
0.27387	-0.271797	-240
0.35607	-0.262843	-240
0.272093	-0.285826	-240
0.250268	-0.294038	-240
0.138986	-0.316878	-240
0.10144	-0.339316	-240
0.148315	-0.336241	-240
0.197411	-0.336921	-240
0.439971	-0.284819	-240
0.120219	-0.359094	-240
0.233705	-0.340996	-240
0.164036	-0.357216	-240
0.281203	-0.326682	-240
0.141421	-0.362496	-240
0.234963	-0.357522	-240
0.264074	-0.37147	-240
0.22729	-0.400133	-240
0.359358	-0.36851	-240
0.25238	-0.418564	-240
0.359635	-0.391758	-240
0.222905	-0.442316	-240
0.262857	-0.426647	-240
0.274984	-0.445717	-240
-0.125083	-0.12294	-240
-0.106044	-0.16322	-240
-0.170275	-0.202896	-240
-0.0474153	-0.172269	-240
-0.155913	-0.223966	-240
-0.114295	-0.221405	-240
-0.181085	-0.244672	-240
-0.136443	-0.254984	-240
0.250107	0.258269	-120
0.284338	0.197951	-120
0.24131	0.178531	-120
0.187504	0.156779	-120
0.101607	0.126854	-120
0.27131	0.164421	-120
0.205328	0.131005	-120
0.150146	0.114226	-120
0.225777	0.133574	-120
0.358835	0.169673	-120
0.146409	0.103987	-120
0.114734	0.0894596	-120
0.166271	0.100835	-120
0.238575	0.116622	-120
0.279514	0.118464	-120
0.359192	0.141014	-120
0.198747	0.0911792	-120
0.289549	0.107081	-120
0.223796	0.0844372	-120
0.217619	0.0507199	-120
0.171672	0.0431576	-120
0.0908991	0.0187582	-120
0.287827	0.0645061	-120
0.236491	0.0410278	-120
0.281575	0.0476979	-120
0.163709	0.00995114	-120
0.337321	0.0524468	-120
0.301604	0.0364012	-120
0.234597	0.00105771	-120
0.0703577	-0.0125768	-120
0.146732	-0.00726103	-120
0.136939	-0.0156456	-120
0.153088	-0.0219179	-120
0.286261	-0.00280554	-120
0.178638	-0.0409853	-120
0.0991836	-0.0658308	-120
0.2561	-0.0243896	-120
0.231425	-0.0317919	-120
0.209283	-0.0459609	-120
0.337108	-0.0175523	-120
0.196295	-0.0649577	-120
0.26823	-0.050166	-120
0.294206	-0.0459416	-120
0.350931	-0.028935	-120
0.346285	-0.045428	-120
0.266687	-0.0749344	-120
0.352583	-0.0559375	-120
0.23789	-0.0894051	-120
0.191775	-0.104197	-120
0.235397	-0.105917	-120
0.329733	-0.0878578	-120
0.269617	-0.109082	-120
0.27059	-0.121659	-120
0.357989	-0.100852	-120
0.229721	-0.140155	-120
0.346832	-0.119618	-120
0.373505	-0.109416	-120
0.322594	-0.132092	-120
0.226813	-0.156539	-120
0.246451	-0.160096	-120
0.227556	-0.170663	-120
0.177705	-0.189018	-120
0.246491	-0.170239	-120
0.261062	-0.179131	-120
0.345433	-0.158664	-120
0.33275	-0.165919	-120
0.230095	-0.18982	-120
0.324068	-0.179638	-120
0.163686	-0.222376	-120
0.110635	-0.252512	-120
0.171372	-0.239036	-120
0.20793	-0.226819	-120
0.256146	-0.227159	-120
0.254516	-0.255709	-120
0.392152	-0.226838	-120
0.185189	-0.285947	-120
0.196007	-0.290672	-120
0.359296	-0.254836	-120
0.384979	-0.263445	-120
0.247556	-0.329558	-120
0.272317	-0.431585	-120
-0.218724	0.175287	-120
-0.0630508	-0.0476296	-120
-0.115133	-0.0744825	-120
-0.165851	-0.11094	-120
-0.204149	-0.130243	-120
-0.0338591	-0.11517	-120
-0.0280705	-0.142965	-120
-0.0743946	-0.154618	-120
-0.142681	-0.179618	-120
-0.15404	-0.193471	-120
-0.0523817	-0.164962	-120
-0.160554	-0.240165	-120
-0.0712746	-0.233298	-120
-0.0818828	-0.233096	-120
-0.115417	-0.256592	-120
-0.0513873	-0.243503	-120
-0.100177	-0.291594	-120
0.169244	0.177127	0
0.186198	0.143832	0
0.242169	0.143839	0
0.116307	0.108927	0
0.251237	0.12296	0
0.263008	0.117858	0
0.162552	0.0950454	0
0.170667	0.0918704	0
0.333133	0.120498	0
0.35291	0.111389	0
0.111747	0.063071	0
0.307082	0.101019	0
0.235786	0.0707147	0
0.184541	0.0601666	0
0.149221	0.0521664	0
0.223672	0.053612	0
0.129661	0.0260997	0
0.289797	0.0500013	0
0.126061	0.00774938	0
0.242717	0.0239544	0
0.199003	0.0108254	0
0.153844	0.00335322	0
0.263283	0.0207794	0
0.223226	0.0144888	0
0.0546108	-0.0121621	0
0.0491194	-0.0308513	0
0.171758	-0.0065271	0
0.123433	-0.0171681	0
0.139398	-0.0283418	0
0.174855	-0.0312299	0
0.184124	-0.0401895	0
0.322659	-0.0220265	0
0.150158	-0.062723	0
0.169495	-0.0774844	0
0.231329	-0.0725361	0
0.140187	-0.0864311	0
0.25386	-0.0703797	0
0.298848	-0.079981	0
0.0570622	-0.129213	0
0.192575	-0.10754	0
0.181712	-0.109876	0
0.0845476	-0.137615	0
0.203358	-0.116326	0
0.16305	-0.125645	0
0.344385	-0.0969438	0
0.304077	-0.112745	0
0.156815	-0.149045	0
0.267626	-0.130998	0
0.111462	-0.173228	0
0.179227	-0.159051	0
0.346567	-0.127243	0
0.194038	-0.166996	0
0.234352	-0.154988	0
0.303717	-0.149892	0
0.296631	-0.158313	0
0.182706	-0.194715	0
0.276454	-0.176944	0
0.181615	-0.205844	0
0.297705	-0.205838	0
0.2101	-0.243576	0
0.356973	-0.22599	0
0.161764	-0.27107	0
0.35527	-0.237209	0
0.197123	-0.272553	0
0.175227	-0.284298	0
0.16537	-0.301183	0
0.250546	-0.469604	0
-0.0870292	-0.127711	0
-0.169171	-0.147741	0
-0.0476805	-0.127146	0
-0.146774	-0.149018	0
-0.0764655	-0.141214	0
-0.133298	-0.191717	0
-0.159109	-0.208956	0
-0.132206	-0.202095	0
-0.120341	-0.204046	0
-0.0982254	-0.211985	0
-0.197183	-0.248619	0
0.132877	0.185303	120
0.103078	0.148056	120
0.0994562	0.122385	120
0.34875	0.170938	120
0.231209	0.116423	120
0.191908	0.0936167	120
0.219471	0.100109	120
0.266253	0.104689	120
0.251138	0.10091	120
0.147198	0.0681038	120
0.28268	0.106733	120
0.344935	0.125041	120
0.22051	0.0872385	120
0.170328	0.0697315	120
0.137792	0.0519595	120
0.172473	0.0565271	120
0.155797	0.0411525	120
0.222939	0.0604134	120
0.246643	0.0640662	120
0.260969	0.0562054	120
0.127036	0.0134378	120
0.242442	0.0480796	120
0.18626	0.0271469	120
0.314324	0.0592273	120
0.369433	0.0721604	120
0.134603	0.00287052	120
0.276255	0.0395816	120
0.338748	0.0417897	120
0.327935	0.0338343	120
0.315823	0.029866	120
0.30409	0.00996164	120
0.352711	0.0212608	120
0.162279	-0.0022563	120
0.0680164	-0.0335437	120
0.144712	-0.0115763	120
0.115871	-0.0283632	120
0.196727	-0.0167087	120
0.144854	-0.0561729	120
0.254328	-0.0310648	120
0.218092	-0.055132	120
0.30514	-0.0389408	120
0.191738	-0.0692956	120
0.33507	-0.0307579	120
0.244474	-0.0755711	120
0.349459	-0.0413415	120
0.301451	-0.0565279	120
0.16531	-0.102388	120
0.218075	-0.0989705	120
0.146681	-0.119662	120
0.404636	-0.0628336	120
0.337511	-0.0838503	120
0.23323	-0.112942	120
0.255838	-0.120673	120
0.287005	-0.107827	120
0.189581	-0.142496	120
0.347949	-0.101263	120
0.215135	-0.149716	120
0.274211	-0.135499	120
0.180874	-0.168435	120
0.218257	-0.160516	120
0.272236	-0.188916	120
0.19948	-0.229	120
0.18508	-0.265558	120
0.202557	-0.301045	120
-0.24798	0.0954969	120
-0.1271	-0.0703092	120
-0.182268	-0.138304	120
-0.110383	-0.116372	120
-0.162971	-0.136363	120
-0.0703853	-0.121012	120
-0.08199	-0.143322	120
-0.171477	-0.182901	120
-0.0187788	-0.138304	120
-0.112607	-0.175827	120
-0.105812	-0.180536	120
-0.0807141	-0.175856	120
-0.0953754	-0.221043	120
-0.100526	-0.235282	120
0.138305	0.189386	240
0.0903082	0.163685	240
0.102488	0.11063	240
0.287051	0.111296	240
0.136861	0.0795782	240
0.276604	0.1001	240
0.139299	0.0634075	240
0.201579	0.0764745	240
0.312456	0.0921634	240
0.198019	0.0641586	240
0.231358	0.0551733	240
0.150161	0.0382727	240
0.173926	0.0368767	240
0.311942	0.0584542	240
0.165727	0.0243057	240
0.144805	0.0197351	240
0.280412	0.0449124	240
0.254469	0.0383435	240
0.125917	0.0106364	240
0.155182	0.00402497	240
0.227227	0.016766	240
0.358338	0.0416174	240
0.338422	0.0347933	240
0.316333	0.0213224	240
0.289547	0.0154338	240
0.254937	0.00443597	240
0.102881	-0.0163723	240
0.187671	-0.00403198	240
0.149549	-0.0105832	240
0.173088	-0.0091694	240
0.134035	-0.0172741	240
0.0719692	-0.0321278	240
0.121965	-0.0261118	240
0.186059	-0.0233482	240
0.165709	-0.0254369	240
0.331292	-0.00570179	240
0.192068	-0.0399649	240
0.104181	-0.0561626	240
0.319453	-0.021469	240
0.245201	-0.0472317	240
0.272069	-0.0500884	240
0.137987	-0.0783006	240
0.197453	-0.0691021	240
0.166264	-0.0770148	240
0.276939	-0.0674498	240
0.320649	-0.0622833	240
0.214665	-0.0865682	240
0.195471	-0.0966045	240
0.331217	-0.0741581	240
0.225031	-0.0919151	240
0.260524	-0.0960285	240
0.201648	-0.112692	240
0.297237	-0.101975	240
0.236748	-0.122396	240
0.238048	-0.144011	240
0.13151	-0.164159	240
0.224309	-0.148834	240
0.1197	-0.175022	240
0.273114	-0.163926	240
0.242428	-0.186699	240
0.212718	-0.190742	240
0.203139	-0.249505	240
0.194512	-0.253095	240
0.184626	-0.259012	240
0.212649	-0.281639	240
0.21444	-0.296743	240
0.223794	-0.295923	240
-0.266349	0.0750337	240
-0.219075	0.0586491	240
-0.111554	0.0381684	240
-0.214792	-0.101225	240
-0.18386	-0.117559	240
-0.105012	-0.146238	240
-0.113135	-0.159586	240
-0.171342	-0.179452	240
-0.0763394	-0.173512	240
-0.0982964	-0.176161	240
-0.183427	-0.213526	240
-0.0656312	-0.193075	240
-0.113094	-0.205316	240
-0.0950176	-0.201836	240
-0.105787	-0.211428	240
-0.111626	-0.222901	240
-0.179526	-0.248547	240
-0.144332	-0.253701	240
0.172475	0.197177	360
0.253141	0.208196	360
0.116271	0.154058	360
0.299561	0.181093	360
0.219365	0.149343	360
0.255457	0.137335	360
0.357867	0.144217	360
0.0920938	0.0862156	360
0.202181	0.104535	360
0.156659	0.0950067	360
0.142046	0.0883981	360
0.247386	0.0991133	360
0.303122	0.100444	360
0.169697	0.0711885	360
0.219365	0.0660552	360
0.274087	0.0767324	360
0.287195	0.0749985	360
0.327716	0.0808846	360
0.152334	0.0396666	360
0.156027	0.0335904	360
0.207213	0.0374992	360
0.245724	0.0446097	360
0.260378	0.044374	360
0.30571	0.0505567	360
0.161319	0.0189283	360
0.276507	0.0294914	360
0.247195	0.0226623	360
0.233063	0.0216356	360
0.313282	0.0279856	360
0.28507	0.028594	360
0.309004	0.00668461	360
0.135394	-0.00625725	360
0.0929449	-0.0233457	360
0.15146	-0.00283689	360
0.258172	-0.000261557	360
0.151286	-0.0278324	360
0.291438	-0.00349414	360
0.247253	-0.0168335	360
0.205238	-0.0308101	360
0.34975	-0.00800097	360
0.167612	-0.0389653	360
0.194314	-0.0374764	360
0.27814	-0.0248211	360
0.16437	-0.0436733	360
0.153162	-0.0570597	360
0.109213	-0.0638803	360
0.172533	-0.0623378	360
0.230903	-0.064115	360
0.285087	-0.0562482	360
0.351186	-0.047429	360
0.210987	-0.077877	360
0.273607	-0.0722032	360
0.142115	-0.0964743	360
0.206223	-0.0886075	360
0.257935	-0.0832087	360
0.356426	-0.0757644	360
0.338855	-0.0911694	360
0.262068	-0.11037	360
0.128846	-0.149544	360
0.379167	-0.111812	360
0.372225	-0.124448	360
0.211763	-0.153514	360
0.252255	-0.170636	360
0.18259	-0.184163	360
0.240624	-0.184143	360
0.253077	-0.192955	360
0.244034	-0.206523	360
0.225739	-0.236904	360
0.18391	-0.273803	360
0.221582	-0.298812	360
0.213344	-0.304506	360
-0.105337	0.00227915	360
-0.0416938	-0.0261701	360
-0.110829	-0.124897	360
-0.0846336	-0.156634	360
-0.146044	-0.178289	360
-0.112268	-0.201146	360
-0.137206	-0.225948	360
-0.100816	-0.228058	360
-0.0780724	-0.24125	360
0.162419	0.186923	480
0.281197	0.20235	480
0.204813	0.188648	480
0.239648	0.177758	480
0.282337	0.165842	480
0.11375	0.124121	480
0.28341	0.141319	480
0.232692	0.111362	480
0.217036	0.10988	480
0.271709	0.117806	480
0.200177	0.0727872	480
0.228674	0.0688203	480
0.161023	0.0512277	480
0.258034	0.0619429	480
0.116961	0.0224259	480
0.159429	0.0284902	480
0.224884	0.0405809	480
0.215237	0.0304813	480
0.309404	0.03707	480
0.33873	0.0439094	480
0.331217	0.0156092	480
0.306107	0.00764502	480
0.164417	-0.00933987	480
0.129088	-0.00804741	480
0.122046	-0.0154669	480
0.0541625	-0.0194967	480
0.211883	-0.00815714	480
0.231211	-0.00459068	480
0.0853719	-0.0228802	480
0.0595589	-0.0368169	480
0.109505	-0.0365486	480
0.126659	-0.0320738	480
0.322972	-0.0172897	480
0.156126	-0.0437547	480
0.223499	-0.0467908	480
0.072525	-0.0704392	480
0.207764	-0.0615322	480
0.290872	-0.0518143	480
0.329645	-0.0691589	480
0.231245	-0.0807179	480
0.199377	-0.0944168	480
0.332879	-0.0856317	480
0.203962	-0.109122	480
0.139472	-0.128813	480
0.190848	-0.129886	480
0.201164	-0.132398	480
0.214965	-0.133715	480
0.161188	-0.144561	480
0.200597	-0.151468	480
0.139154	-0.161747	480
0.198917	-0.175141	480
0.217717	-0.183115	480
0.225417	-0.194284	480
0.110606	-0.240556	480
0.139296	-0.266631	480
0.168014	-0.284342	480
0.133281	-0.287939	480
0.381691	-0.256127	480
0.363056	-0.260736	480
0.151468	-0.307057	480
0.165711	-0.332846	480
0.199893	-0.336321	480
0.282729	-0.378911	480
-0.12905	-0.0801774	480
-0.0756924	-0.108296	480
-0.0717912	-0.134244	480
-0.151608	-0.151599	480
-0.128993	-0.165109	480
-0.0784124	-0.156065	480
-0.136262	-0.183919	480
-0.107664	-0.183599	480
-0.123683	-0.215487	480
-0.197484	-0.228421	480
-0.135464	-0.239503	480
-0.120445	-0.24688	480
-0.10985	-0.274948	480
0.193688	0.205315	600
0.241681	0.205748	600
0.139976	0.142737	600
0.248345	0.164288	600
0.204212	0.143806	600
0.330008	0.173586	600
0.131818	0.0986092	600
0.329034	0.155605	600
0.101976	0.0819135	600
0.228845	0.124065	600
0.0767959	0.0642259	600
0.0993657	0.0654414	600
0.224957	0.101704	600
0.166351	0.0756125	600
0.110598	0.0564439	600
0.330008	0.130911	600
0.266883	0.0846169	600
0.189103	0.0493884	600
0.311138	0.0898143	600
0.136713	0.0295143	600
0.250469	0.0618578	600
0.219548	0.0466011	600
0.135386	0.0162276	600
0.163436	0.0182255	600
0.185917	0.0292209	600
0.29719	0.0579318	600
0.239043	0.0366885	600
0.223978	0.0255255	600
0.27613	0.0392662	600
0.212651	0.0169192	600
0.18871	0.00341597	600
0.247659	0.0121061	600
0.26174	0.0125741	600
0.0557027	-0.0122588	600
0.0883711	-0.0167044	600
0.12787	-0.00489843	600
0.167871	-0.00305514	600
0.161965	-0.0128265	600
0.182029	-0.0140638	600
0.147315	-0.0262908	600
0.21185	-0.016883	600
0.175725	-0.0273496	600
0.206861	-0.0293013	600
0.164824	-0.0426954	600
0.230382	-0.0321459	600
0.241863	-0.0406799	600
0.213829	-0.0549287	600
0.170603	-0.0637115	600
0.199594	-0.0576139	600
0.290896	-0.0344867	600
0.25653	-0.0456676	600
0.233778	-0.0554517	600
0.176554	-0.0739484	600
0.15305	-0.0846765	600
0.1433	-0.103256	600
0.273509	-0.0714737	600
0.318526	-0.0618235	600
0.33676	-0.0577925	600
0.221533	-0.0975348	600
0.168939	-0.127614	600
0.332568	-0.0789234	600
0.251282	-0.127735	600
0.24605	-0.165137	600
0.193029	-0.190286	600
0.231239	-0.180228	600
0.220344	-0.192691	600
0.156346	-0.222636	600
0.20247	-0.218286	600
0.21326	-0.214746	600
0.239253	-0.20641	600
0.171881	-0.233581	600
0.203333	-0.238881	600
0.20383	-0.256625	600
0.272165	-0.243939	600
0.206181	-0.281577	600
-0.165491	-0.0477467	600
-0.0515066	-0.130744	600
-0.143421	-0.153067	600
-0.0895568	-0.14872	600
-0.176734	-0.196004	600
-0.098259	-0.18043	600
-0.0781213	-0.195868	600
-0.122163	-0.207835	600
-0.0344169	-0.180543	600
-0.0871935	-0.230282	600
-0.103676	-0.241503	600
0.198104	0.18794	840
0.147852	0.127245	840
0.241727	0.13218	840
0.233982	0.114155	840
0.300957	0.10774	840
0.272793	0.0968799	840
0.0795541	0.0717467	840
0.246377	0.0915488	840
0.185567	0.06432	840
0.224646	0.0669324	840
0.154708	0.0556401	840
0.0962828	0.0473072	840
0.146559	0.0424292	840
0.176356	0.0406947	840
0.315712	0.0547551	840
0.154398	0.0350804	840
0.196107	0.0358804	840
0.132614	0.011179	840
0.306549	0.0404964	840
0.301231	0.0347618	840
0.184952	0.0129773	840
0.290947	0.0265209	840
0.268853	0.0219615	840
0.24708	0.0103861	840
0.138152	-0.0054769	840
0.22436	-0.00633927	840
0.176922	-0.0155455	840
0.199982	-0.0167562	840
0.0639461	-0.0331298	840
0.181513	-0.0245118	840
0.0947805	-0.0437238	840
0.130474	-0.0390979	840
0.285188	-0.024923	840
0.181769	-0.0469734	840
0.282601	-0.0487267	840
0.21661	-0.0676018	840
0.203893	-0.0683156	840
0.175163	-0.0828389	840
0.230119	-0.0961399	840
0.265902	-0.0996465	840
0.204883	-0.107956	840
0.248255	-0.113233	840
0.178502	-0.132394	840
0.25427	-0.146883	840
0.175479	-0.169356	840
0.242955	-0.184404	840
0.309113	-0.188807	840
0.295949	-0.18421	840
0.413658	-0.180618	840
0.31071	-0.205535	840
0.351388	-0.220093	840
0.385388	-0.250938	840
0.409712	-0.28605	840
0.288986	-0.320613	840
0.377876	-0.312583	840
0.312702	-0.330225	840
0.316404	-0.338591	840
0.383945	-0.349768	840
-0.308839	0.188954	840
-0.0717995	0.0378788	840
-0.252185	-0.0890161	840
-0.162736	-0.0926182	840
-0.0847137	-0.108223	840
-0.0780159	-0.118419	840
-0.136127	-0.152962	840
-0.154496	-0.170367	840
-0.113663	-0.167615	840
-0.186602	-0.187474	840
-0.160846	-0.188581	840
-0.128424	-0.188222	840
-0.0828488	-0.186301	840
-0.131191	-0.21291	840
-0.127948	-0.242133	840
0.146459	0.222697	960
0.15177	0.178648	960
0.254586	0.178538	960
0.11583	0.157328	960
0.110044	0.133853	960
0.261665	0.137617	960
0.250289	0.133411	960
0.295366	0.127948	960
0.0564778	0.0851146	960
0.177767	0.0888717	960
0.0911991	0.0729731	960
0.0416891	0.0527926	960
0.136029	0.0495328	960
0.202312	0.0485383	960
0.25751	0.049146	960
0.220433	0.0371081	960
0.0531639	0.00164373	960
0.322508	0.0258576	960
0.358286	0.00160919	960
0.172401	-0.0091628	960
0.177137	-0.0179853	960
0.258778	-0.00760786	960
0.28127	-0.027742	960
0.16202	-0.0498248	960
0.192476	-0.0743635	960
0.204161	-0.0783943	960
0.268756	-0.080283	960
0.184822	-0.10314	960
0.225046	-0.104415	960
0.195097	-0.122533	960
0.237256	-0.173413	960
0.338026	-0.16465	960
0.269319	-0.194274	960
0.410362	-0.190143	960
0.335293	-0.230732	960
0.365118	-0.240141	960
0.269814	-0.258581	960
0.402059	-0.23551	960
0.407481	-0.244393	960
0.218424	-0.27084	960
0.236533	-0.270993	960
0.353087	-0.268257	960
0.267099	-0.290106	960
0.339071	-0.278401	960
0.368772	-0.282525	960
0.404124	-0.295205	960
0.366762	-0.309033	960
0.338644	-0.305522	960
0.326903	-0.318776	960
0.276231	-0.339831	960
0.270741	-0.356108	960
0.314575	-0.356875	960
0.358329	-0.36174	960
0.321364	-0.366619	960
0.281319	-0.377837	960
0.230375	-0.396289	960
0.376154	-0.378251	960
0.258809	-0.403257	960
0.362027	-0.401228	960
0.406244	-0.394855	960
0.41767	-0.430939	960
-0.0660986	-0.00402912	960
-0.158428	-0.20896	960
-0.125011	-0.221945	960
0.2293	0.230776	1080
0.0310773	0.171348	1080
0.285339	0.127877	1080
0.225709	0.101016	1080
0.115906	0.0649236	1080
0.147207	0.0734338	1080
0.0328228	0.0460445	1080
0.0613468	0.0488978	1080
0.163542	0.0667947	1080
0.14742	0.0434523	1080
0.257523	0.0411647	1080
0.23183	0.0350789	1080
0.276299	0.0392563	1080
0.0740843	-0.0017044	1080
0.0673381	-0.0206024	1080
0.156719	-0.0202186	1080
0.063912	-0.0483346	1080
0.190515	-0.0229313	1080
0.10288	-0.0977687	1080
0.164014	-0.0846734	1080
0.253301	-0.0755985	1080
0.206632	-0.0980874	1080
0.308609	-0.0928767	1080
0.249427	-0.109751	1080
0.244001	-0.112737	1080
0.214752	-0.151802	1080
0.180195	-0.185695	1080
0.236506	-0.179489	1080
0.370964	-0.17474	1080
0.436787	-0.152583	1080
0.414885	-0.162276	1080
0.279035	-0.196923	1080
0.186729	-0.241452	1080
0.312613	-0.220648	1080
0.280982	-0.226867	1080
0.325946	-0.221539	1080
0.343431	-0.219152	1080
0.292734	-0.232429	1080
0.356316	-0.224258	1080
0.328411	-0.230907	1080
0.240439	-0.261482	1080
0.254268	-0.250436	1080
0.380329	-0.226952	1080
0.274854	-0.264617	1080
0.343531	-0.242096	1080
0.352754	-0.252557	1080
0.303314	-0.258125	1080
0.393279	-0.238512	1080
0.369054	-0.248992	1080
0.30306	-0.279326	1080
0.249875	-0.283002	1080
0.214487	-0.297658	1080
0.276972	-0.280341	1080
0.345359	-0.266836	1080
0.245588	-0.292864	1080
0.320167	-0.281707	1080
0.292652	-0.285402	1080
0.282143	-0.296279	1080
0.162186	-0.324818	1080
0.366872	-0.282507	1080
0.182301	-0.33053	1080
0.348951	-0.294483	1080
0.207988	-0.320667	1080
0.393261	-0.28373	1080
0.268515	-0.307325	1080
0.329325	-0.298165	1080
0.341556	-0.305165	1080
0.325233	-0.307676	1080
0.455746	-0.284472	1080
0.275397	-0.322743	1080
0.346008	-0.312868	1080
0.363711	-0.315034	1080
0.253106	-0.332663	1080
0.378011	-0.317011	1080
0.29777	-0.339136	1080
0.154077	-0.391218	1080
0.264464	-0.36638	1080
0.198205	-0.383307	1080
0.202321	-0.389969	1080
0.368729	-0.363557	1080
0.140874	-0.41478	1080
0.271375	-0.389143	1080
0.430394	-0.352693	1080
0.412839	-0.357871	1080
0.196247	-0.410018	1080
0.28715	-0.403337	1080
0.384905	-0.403129	1080
0.126361	-0.471656	1080
-0.0647213	-0.146504	1080
-0.00962758	-0.183457	1080
-0.105491	-0.34179	1080
0.126383	0.279412	1200
0.238995	0.238218	1200
0.281263	0.199805	1200
0.172848	0.159553	1200
0.23789	0.171041	1200
0.104825	0.124883	1200
0.0428818	0.0992653	1200
0.267082	0.146758	1200
0.0346281	0.0810077	1200
0.156662	0.105437	1200
0.115932	0.0857862	1200
0.214888	0.102497	1200
0.157428	0.0742781	1200
0.151507	0.0596441	1200
0.242964	0.0820298	1200
0.0354406	0.0249408	1200
0.184632	0.0508638	1200
0.0789244	0.0241311	1200
0.244431	0.06352	1200
0.139179	0.03619	1200
0.0732135	0.0156826	1200
0.216829	0.0470277	1200
0.212176	0.0396544	1200
0.305661	0.0592393	1200
0.18676	0.0258566	1200
0.325442	0.0593322	1200
0.236329	0.0113554	1200
0.228637	0.000318562	1200
0.0581616	-0.00654427	1200
0.130972	-0.0170221	1200
0.213637	-0.0201535	1200
0.174602	-0.0399552	1200
0.336957	-0.0130393	1200
0.197931	-0.0749847	1200
0.209996	-0.0880944	1200
0.228455	-0.0926331	1200
0.394383	-0.0845196	1200
0.388309	-0.0892695	1200
0.299103	-0.116017	1200
0.232243	-0.136318	1200
0.445337	-0.078292	1200
0.427088	-0.128577	1200
0.295619	-0.16322	1200
0.396633	-0.156725	1200
0.362537	-0.180812	1200
0.397685	-0.175661	1200
0.179337	-0.257471	1200
0.39129	-0.190051	1200
0.483291	-0.179792	1200
0.351401	-0.220394	1200
0.323712	-0.222449	1200
0.211323	-0.260356	1200
0.372918	-0.222118	1200
0.39056	-0.230021	1200
0.299623	-0.260821	1200
0.351711	-0.242427	1200
0.350057	-0.254685	1200
0.284326	-0.273867	1200
0.399591	-0.257077	1200
0.253696	-0.292916	1200
0.163595	-0.325476	1200
0.269712	-0.30566	1200
0.324571	-0.293887	1200
0.396838	-0.2793	1200
0.349291	-0.285992	1200
0.211591	-0.326285	1200
0.271396	-0.3144	1200
0.362496	-0.306012	1200
0.2363	-0.335777	1200
0.463802	-0.280609	1200
0.304884	-0.320507	1200
0.25794	-0.354791	1200
0.237902	-0.350935	1200
0.311717	-0.335222	1200
0.353932	-0.322583	1200
[truncated: 315 more rows]
