# Supplementary material for: Spinal premotor interneurons controlling antagonistic muscles are spatially intermingled
Source: eLife. 2022 Dec 13;11:e81976. doi: 10.7554/eLife.81976 (PMC9844990; doi:10.7554/eLife.81976)
Supplement: Figure 12—figure supplement 15—source data 1. — The x-y coordinates are normalized (between –0.5 and 0.5) and scaled to an idealized spinal cord of dimensions 1700 μm and 900 μm in the mediolateral and dorsoventral directions respectively, while z coordinates are in micron, with the axis origin taken at the border between L4 and L5 and negative values in the rostral direction. [file elife-81976-fig12-figsupp15-data1.xlsx]

## Sheet: Sheet1
0.104111	-0.234019	-5760
0.267522	-0.223956	-5760
-0.144625	-0.183266	-5760
0.270546	-0.127066	-5760
-0.0909428	-0.123832	-5760
0.227972	-0.0396578	-5760
-0.145915	0.0261159	-5760
-0.183059	-0.266773	-5640
-0.114271	-0.182398	-5640
-0.17555	-0.174614	-5640
0.355909	-0.0846165	-5640
0.173596	-0.0110613	-5640
0.209641	0.102623	-5640
0.184881	0.111137	-5640
-0.125575	-0.160965	-5520
0.237095	-0.115652	-5520
0.263104	-0.268389	-5400
-0.222527	-0.258199	-5400
-0.21761	-0.222402	-5400
0.282817	-0.134354	-5400
0.299706	-0.121049	-5280
0.228492	0.121435	-5280
0.255324	-0.323053	-5160
-0.178807	-0.289517	-5160
-0.125513	-0.270983	-5160
0.202573	0.0625386	-5160
0.28633	0.0732521	-5160
-0.127817	-0.19071	-5040
0.262182	-0.173649	-5040
-0.070671	-0.154701	-5040
-0.0922046	-0.115721	-5040
0.30035	-0.112192	-5040
0.183689	-0.10328	-5040
0.246685	0.0993441	-5040
0.26425	0.144619	-5040
0.216119	-0.198066	-4920
0.268091	-0.146165	-4920
-0.222717	-0.113286	-4920
-0.131737	-0.0888087	-4920
0.275576	-0.0182881	-4920
0.34437	-0.23287	-4800
0.153438	-0.222152	-4800
0.350505	-0.169753	-4800
-0.178251	-0.168504	-4800
0.315181	-0.161542	-4800
0.27899	-0.130433	-4800
0.296961	-0.0869521	-4800
0.204452	-0.0860796	-4800
0.248735	0.0311984	-4800
0.00747367	0.351754	-4800
0.428806	-0.306435	-4680
0.448654	-0.296988	-4680
-0.163515	-0.171404	-4680
0.23241	-0.159849	-4680
0.297236	-0.134837	-4680
-0.25371	-0.130937	-4680
0.35757	-0.119387	-4680
0.286341	-0.101572	-4680
-0.179703	-0.100453	-4680
0.274315	0.0173202	-4680
0.250298	0.023788	-4680
0.317406	0.0613492	-4680
0.189436	0.154127	-4680
-0.151377	-0.205691	-4560
0.331521	-0.0937102	-4560
0.328217	-0.0668219	-4560
0.284859	0.143469	-4560
0.294871	-0.285008	-4440
0.166625	-0.221057	-4440
-0.139663	-0.181578	-4440
0.374669	-0.152299	-4440
0.212921	-0.132363	-4440
-0.165223	-0.113343	-4440
0.315977	-0.0926008	-4440
0.214668	-0.0827329	-4440
-0.163783	-0.0751083	-4440
-0.207444	-0.048183	-4440
0.298875	-0.038854	-4440
0.407206	-0.245417	-4320
0.272816	-0.237044	-4320
-0.14602	-0.212535	-4320
-0.092833	-0.194672	-4320
0.228196	-0.164608	-4320
-0.161502	-0.158763	-4320
0.255709	-0.139284	-4320
0.349737	-0.0996083	-4320
0.423774	-0.0907395	-4320
0.303271	-0.0773965	-4320
0.317847	-0.0323451	-4320
0.272272	-0.0291088	-4320
0.260758	-0.0249706	-4320
0.102708	-0.0228308	-4320
0.162846	-0.0130247	-4320
0.107048	0.0105705	-4320
0.318435	0.0138205	-4320
0.195072	0.0149125	-4320
0.281211	0.0165988	-4320
0.173366	0.0380759	-4320
0.234871	0.0900433	-4320
0.148852	0.099496	-4320
0.0550642	0.117671	-4320
0.156429	-0.250352	-4200
0.154052	-0.235539	-4200
-0.188296	-0.229988	-4200
-0.145756	-0.166784	-4200
0.290515	-0.163385	-4200
0.210632	-0.147527	-4200
0.358625	-0.143147	-4200
-0.194541	-0.134886	-4200
-0.128167	-0.116882	-4200
0.281348	-0.116284	-4200
0.434399	-0.0250089	-4200
0.285404	-0.010587	-4200
0.245154	0.00127551	-4200
0.14322	0.006661	-4200
0.173653	0.016507	-4200
0.301192	0.103883	-4200
0.224538	0.113483	-4200
0.229752	0.12277	-4200
0.224647	0.145468	-4200
0.265953	0.145893	-4200
0.16404	-0.24725	-4080
0.303037	-0.190349	-4080
-0.173957	-0.181328	-4080
-0.115844	-0.125581	-4080
0.417043	-0.120402	-4080
0.270112	-0.114375	-4080
0.286601	-0.109938	-4080
0.370181	-0.0957472	-4080
-0.110954	-0.0953715	-4080
0.184728	-0.0854197	-4080
0.271875	-0.0822469	-4080
0.217243	0.00586152	-4080
0.200296	0.04119	-4080
0.166039	0.0819019	-4080
0.402879	0.0898412	-4080
0.210928	0.0939909	-4080
0.253623	0.117827	-4080
0.236468	0.139986	-4080
0.227809	0.180733	-4080
0.23172	0.209539	-4080
0.211055	-0.189078	-3960
0.280045	-0.12182	-3960
0.259542	-0.0805555	-3960
0.300716	-0.0468053	-3960
-0.291076	-0.043451	-3960
0.248643	-0.00773642	-3960
0.258712	0.00561969	-3960
0.313803	0.0113922	-3960
0.229423	0.0129798	-3960
0.313905	0.0441206	-3960
0.204828	0.0612653	-3960
0.240728	0.0898952	-3960
0.190606	0.111384	-3960
0.238844	0.112261	-3960
0.213614	0.126317	-3960
0.184029	0.152296	-3960
0.0367639	0.154841	-3960
0.252269	0.159916	-3960
0.325115	-0.0660444	-3840
0.36412	-0.0585036	-3840
0.184157	-0.0275305	-3840
0.124808	-0.0202984	-3840
0.335469	-0.0160844	-3840
0.348877	-0.0118608	-3840
0.308268	-0.00230466	-3840
0.329839	0.0100431	-3840
0.187727	0.0215539	-3840
0.263829	0.0397392	-3840
0.132883	0.0419896	-3840
0.277164	0.0557998	-3840
0.212308	0.063271	-3840
0.199343	0.0669332	-3840
0.141343	0.102423	-3840
0.0765011	0.108448	-3840
0.254963	0.118798	-3840
-0.128533	-0.236453	-3720
0.19908	-0.217782	-3720
-0.178016	-0.174567	-3720
0.329792	-0.161789	-3720
0.308848	-0.139216	-3720
0.237903	-0.120938	-3720
0.156637	-0.11964	-3720
0.274419	-0.101026	-3720
0.254049	-0.0911773	-3720
0.255543	-0.0721614	-3720
0.187668	-0.0466015	-3720
0.23837	-0.0353339	-3720
0.301958	-0.0352405	-3720
0.320386	-0.027959	-3720
0.309592	-0.016234	-3720
0.24139	0.0217252	-3720
0.273587	0.0282957	-3720
0.263834	0.0680184	-3720
0.280207	0.0826644	-3720
0.205554	0.102341	-3720
-0.153483	0.106435	-3720
0.232582	0.129557	-3720
0.231907	0.146237	-3720
-0.181423	0.231361	-3720
0.199699	-0.210613	-3600
-0.137674	-0.189386	-3600
0.395171	-0.137953	-3600
0.255873	-0.112186	-3600
0.303318	-0.097904	-3600
0.305509	-0.081475	-3600
-0.097058	-0.0792834	-3600
0.338692	-0.0598083	-3600
0.280277	-0.0583956	-3600
0.347427	-0.0534514	-3600
0.357684	-0.0518002	-3600
-0.154014	-0.0392898	-3600
0.266576	-0.0283172	-3600
0.280977	-0.0279686	-3600
0.180879	-0.00702656	-3600
0.295551	0	-3600
0.304547	0.00851266	-3600
0.174035	0.0139046	-3600
0.254886	0.0143926	-3600
0.230947	0.0227968	-3600
0.355029	0.028978	-3600
0.329931	0.0301227	-3600
0.138279	0.0408403	-3600
0.167898	0.0413343	-3600
0.277998	0.0427501	-3600
0.162932	0.0547088	-3600
0.42803	0.0614623	-3600
0.233278	0.0663602	-3600
0.120777	0.0737101	-3600
0.262921	0.0811504	-3600
0.174646	0.101128	-3600
0.201482	0.110104	-3600
0.232947	0.123527	-3600
0.245757	0.136558	-3600
0.266773	0.138588	-3600
0.198464	0.145354	-3600
0.148969	0.146703	-3600
0.211987	0.163735	-3600
-0.210943	0.172212	-3600
0.439529	0.252271	-3600
-0.0893974	-0.122253	-3480
0.283559	-0.0865684	-3480
0.107598	-0.0293182	-3480
0.309465	0.0128825	-3480
0.192872	0.0519727	-3480
0.108324	0.0530435	-3480
0.189743	0.151939	-3480
0.22487	0.158165	-3480
-0.0910034	-0.21526	-3360
-0.329952	-0.133566	-3360
0.255656	-0.0600688	-3360
0.244533	-0.0111848	-3360
0.228686	-0.0081903	-3360
0.187722	0.0126065	-3360
0.265316	0.0138628	-3360
0.242849	0.0365631	-3360
0.281652	0.0411819	-3360
0.146746	0.0416746	-3360
0.182339	0.0607968	-3360
0.274599	0.0621085	-3360
0.137293	0.0646766	-3360
0.268569	0.0673864	-3360
0.116416	0.0764948	-3360
0.174181	0.0788782	-3360
0.0622244	0.0896494	-3360
0.188457	0.0908749	-3360
0.22255	0.12248	-3360
0.161349	0.125818	-3360
0.262559	0.136682	-3360
0.0781024	0.269355	-3360
0.117795	-0.351511	-3240
-0.13074	-0.170829	-3240
0.229316	-0.161862	-3240
0.263157	-0.0430815	-3240
0.179341	-0.0336269	-3240
0.256772	-0.0143983	-3240
0.285883	-0.00921778	-3240
0.250589	0.0146459	-3240
0.24151	0.0205143	-3240
0.269964	0.0302425	-3240
0.3205	0.0459085	-3240
0.244204	0.0460596	-3240
0.261993	0.056449	-3240
0.253199	0.0874597	-3240
0.0804158	0.0880264	-3240
0.166925	0.0913447	-3240
0.0417348	0.0923459	-3240
0.181585	0.0950723	-3240
0.262042	0.095979	-3240
0.239848	0.100802	-3240
0.156303	0.109044	-3240
0.193987	0.159625	-3240
0.273711	-0.119455	-3120
0.301048	-0.0848965	-3120
0.256556	-0.0805619	-3120
0.253097	-0.0373553	-3120
0.155605	-0.0298369	-3120
0.206552	0.00606365	-3120
0.226924	0.0284484	-3120
0.160412	0.0289263	-3120
0.292827	0.0568549	-3120
0.245373	0.0770173	-3120
0.14316	0.0802014	-3120
0.215355	0.0865518	-3120
0.0973408	0.101726	-3120
0.233189	0.130353	-3120
0.230652	0.141626	-3120
0.157639	0.156054	-3120
0.213595	0.158264	-3120
0.26135	0.172136	-3120
0.0806705	0.196074	-3120
0.213295	-0.173445	-3000
0.269183	-0.134522	-3000
0.197227	-0.0139672	-3000
0.261118	-0.0123305	-3000
0.298189	0.00922907	-3000
0.274638	0.0200137	-3000
0.258203	0.034762	-3000
0.290757	0.0436916	-3000
0.13366	0.052745	-3000
0.180032	0.0561034	-3000
0.302586	0.0659703	-3000
0.221544	0.0716327	-3000
0.338123	0.0728042	-3000
0.17516	0.0846822	-3000
0.136416	0.0865632	-3000
0.295642	0.100862	-3000
0.260243	0.101891	-3000
0.305475	0.111738	-3000
0.261745	0.129734	-3000
0.214188	0.135696	-3000
0.307971	0.176862	-3000
0.228197	0.180741	-3000
0.177618	0.271066	-3000
0.2984	-0.138996	-2880
0.291624	-0.125871	-2880
0.271029	-0.100598	-2880
0.310864	-0.0972329	-2880
0.321388	-0.0621509	-2880
0.283923	-0.0591312	-2880
0.294501	-0.0473385	-2880
0.336282	-0.0105295	-2880
0.293242	-0.00844731	-2880
0.164127	-0.00438155	-2880
0.27827	0.0196714	-2880
0.200792	0.020174	-2880
0.32737	0.0224326	-2880
0.292794	0.0276239	-2880
0.0333757	0.0278545	-2880
0.277381	0.031609	-2880
0.334282	0.036552	-2880
0.14423	0.0548221	-2880
0.29917	0.0552241	-2880
0.21054	0.0615152	-2880
0.194834	0.0676702	-2880
0.171004	0.0682674	-2880
0.245486	0.0708808	-2880
0.0766728	0.0817778	-2880
0.242334	0.0906941	-2880
0.139317	0.093207	-2880
0.164694	0.117668	-2880
0.144726	0.117928	-2880
0.104067	0.128984	-2880
0.292627	0.139633	-2880
0.194547	0.143506	-2880
0.232275	0.171555	-2880
0.243695	0.178361	-2880
0.199639	0.184599	-2880
0.1309	0.228754	-2880
0.314758	-0.140514	-2760
0.333345	-0.124648	-2760
0.226095	-0.0987808	-2760
0.334941	-0.056259	-2760
0.294656	-0.0458691	-2760
0.253934	-0.0366769	-2760
0.344342	-0.0206365	-2760
0.202483	-0.0146278	-2760
0.277606	-0.00214964	-2760
0.034039	0.0188525	-2760
0.314376	0.0255233	-2760
0.260825	0.0261736	-2760
0.357802	0.0348422	-2760
0.339524	0.0513616	-2760
0.207797	0.052079	-2760
0.29526	0.0539026	-2760
0.190687	0.0577508	-2760
0.282095	0.0651993	-2760
0.239695	0.0879135	-2760
0.271674	0.0884431	-2760
0.19892	0.0889594	-2760
0.195404	0.0988817	-2760
0.235945	0.102717	-2760
0.19378	0.111821	-2760
0.133687	0.116729	-2760
0.212125	0.129728	-2760
0.183239	0.130975	-2760
0.109236	0.153676	-2760
0.270722	0.15731	-2760
-0.0294029	0.37699	-2760
0.2809	-0.1316	-2640
0.248441	-0.112098	-2640
0.17605	-0.0978877	-2640
0.330979	-0.0712512	-2640
0.30857	-0.0680583	-2640
0.292189	-0.0219286	-2640
0.229812	-0.0184288	-2640
0.34147	-0.00554208	-2640
0.154929	0.000624447	-2640
0.203968	0.0098813	-2640
0.291391	0.0104653	-2640
0.319732	0.0135991	-2640
0.300407	0.015033	-2640
0.165952	0.0179297	-2640
0.13648	0.0192943	-2640
0.266944	0.0207918	-2640
0.287636	0.0242436	-2640
0.110111	0.0269322	-2640
0.178741	0.033246	-2640
0.0284438	0.0352639	-2640
0.319986	0.0370563	-2640
0.329014	0.040167	-2640
0.17703	0.0430984	-2640
0.259731	0.044885	-2640
0.291742	0.0515342	-2640
0.247958	0.0573451	-2640
0.197038	0.0623233	-2640
0.146917	0.0727192	-2640
0.249185	0.0862315	-2640
0.0922729	0.0931756	-2640
0.308854	0.0994895	-2640
0.287902	0.103884	-2640
0.242479	0.104242	-2640
0.28081	0.104959	-2640
0.249554	0.115794	-2640
0.276637	0.127214	-2640
0.250207	0.15806	-2640
0.237074	0.161755	-2640
0.259501	0.220811	-2640
0.108103	0.235006	-2640
0.432562	-0.112869	-2520
0.313568	-0.0833937	-2520
0.344848	-0.0769828	-2520
0.303861	-0.040568	-2520
0.168639	-0.0103983	-2520
0.236099	0.00319337	-2520
0.255495	0.00598679	-2520
0.358465	0.0145045	-2520
0.301077	0.0206288	-2520
0.126237	0.0256032	-2520
0.192866	0.0280779	-2520
0.261453	0.0300464	-2520
0.0643698	0.0374643	-2520
0.275154	0.048038	-2520
0.191311	0.0565308	-2520
0.356251	0.0601679	-2520
0.240054	0.063305	-2520
0.305121	0.0663609	-2520
0.284484	0.0775095	-2520
0.201537	0.0778908	-2520
0.352872	0.0786469	-2520
0.10249	0.101588	-2520
0.221816	0.116667	-2520
0.242454	0.121873	-2520
0.108294	0.124404	-2520
0.174507	0.143245	-2520
0.264877	0.166424	-2520
0.291107	0.201214	-2520
0.293692	0.211706	-2520
0.198126	0.223461	-2520
0.330306	-0.155628	-2400
0.271216	-0.139489	-2400
0.264783	-0.123179	-2400
0.313826	-0.10546	-2400
0.317138	-0.0762982	-2400
0.333543	-0.0162246	-2400
0.270412	0.00391479	-2400
0.18542	0.010841	-2400
0.295128	0.0139178	-2400
0.166012	0.0209225	-2400
0.315754	0.029158	-2400
0.266143	0.0326145	-2400
0.391231	0.0345326	-2400
0.190487	0.0370269	-2400
0.230916	0.0409416	-2400
0.153419	0.0470888	-2400
0.335403	0.0547351	-2400
0.205273	0.0606334	-2400
0.321266	0.0610721	-2400
0.232183	0.064378	-2400
0.191333	0.0815232	-2400
0.256497	0.0861647	-2400
0.205316	0.0960106	-2400
0.236483	0.0966521	-2400
0.281423	0.104547	-2400
0.154927	0.106616	-2400
0.158411	0.117634	-2400
0.180582	0.135172	-2400
0.18597	0.144507	-2400
0.263127	0.158654	-2400
0.24603	0.179308	-2400
0.174996	0.185874	-2400
0.222235	0.18916	-2400
0.439077	-0.156551	-2280
0.321827	-0.146513	-2280
0.283367	-0.0816283	-2280
0.308581	-0.0424754	-2280
0.340126	-0.0409808	-2280
0.349468	0.00465147	-2280
0.299929	0.00539622	-2280
0.215517	0.00597112	-2280
0.114423	0.0273078	-2280
0.0603205	0.0313647	-2280
0.375664	0.0342327	-2280
0.357125	0.0386751	-2280
0.315749	0.0445678	-2280
0.185753	0.0466519	-2280
0.0970122	0.0605409	-2280
0.222584	0.0612857	-2280
0.180955	0.0690207	-2280
0.246428	0.0723787	-2280
0.267718	0.0726204	-2280
0.333528	0.0736068	-2280
0.301507	0.0828967	-2280
0.122618	0.0831384	-2280
0.221158	0.0938329	-2280
0.297704	0.0967727	-2280
0.15005	0.0991115	-2280
0.204197	0.103286	-2280
0.15519	0.112321	-2280
0.183636	0.112458	-2280
0.251778	0.117737	-2280
0.0917071	0.118723	-2280
0.238423	0.13533	-2280
0.304638	0.135337	-2280
0.124596	0.139172	-2280
0.183085	0.140008	-2280
0.153777	0.141778	-2280
0.271623	0.15898	-2280
0.244337	0.161155	-2280
0.298154	0.161325	-2280
0.227661	0.176847	-2280
0.120489	0.179284	-2280
0.283684	0.203031	-2280
0.299561	0.206709	-2280
0.24665	0.236016	-2280
0.174915	0.257078	-2280
0.196959	0.294499	-2280
0.384552	-0.258128	-2160
0.187918	-0.208579	-2160
0.194154	-0.166026	-2160
0.311902	-0.128859	-2160
0.295137	-0.0858963	-2160
0.293201	-0.0701183	-2160
0.170822	-0.0650833	-2160
0.2627	-0.0613852	-2160
0.283442	-0.0598923	-2160
0.175336	-0.0281019	-2160
0.266375	-0.018276	-2160
0.344953	-0.015661	-2160
0.25111	-0.00141486	-2160
0.178112	0.0141604	-2160
0.296881	0.0220364	-2160
0.188422	0.0259832	-2160
0.148012	0.0348165	-2160
0.316249	0.0368663	-2160
0.0797953	0.0436322	-2160
0.254691	0.0439318	-2160
0.372226	0.0482427	-2160
0.166481	0.0483308	-2160
0.362947	0.0536872	-2160
0.32125	0.0563772	-2160
0.288605	0.06134	-2160
0.358004	0.0617747	-2160
0.271527	0.0621388	-2160
0.210786	0.0664321	-2160
0.23351	0.0738383	-2160
0.269921	0.0804457	-2160
0.244897	0.0867653	-2160
0.142199	0.0871	-2160
0.174716	0.0932845	-2160
0.219705	0.105383	-2160
0.180952	0.105389	-2160
0.287736	0.105795	-2160
0.202893	0.108367	-2160
0.137766	0.111339	-2160
0.329294	0.122756	-2160
0.17219	0.129	-2160
0.298046	0.134896	-2160
0.281529	0.138221	-2160
0.176588	0.149204	-2160
0.16811	0.150466	-2160
0.277467	0.166747	-2160
0.12814	0.168168	-2160
0.231939	0.17733	-2160
0.267389	0.181859	-2160
0.193018	0.186181	-2160
0.153604	0.188913	-2160
0.304374	0.219412	-2160
0.108575	0.260084	-2160
0.227777	-0.166135	-2040
0.342663	-0.140176	-2040
0.342516	-0.123843	-2040
0.335911	-0.0934097	-2040
0.351594	-0.0930107	-2040
0.240354	-0.0690953	-2040
0.359678	-0.0609619	-2040
0.303662	-0.0592042	-2040
0.219178	-0.0544059	-2040
0.322892	-0.0509568	-2040
0.194988	-0.0495126	-2040
0.169257	-0.0354408	-2040
0.314256	-0.0350987	-2040
0.334794	-0.033588	-2040
0.199567	-0.00419018	-2040
0.282455	-0.00414268	-2040
0.272346	3.295e-05	-2040
0.297358	0.0029655	-2040
0.332376	0.013292	-2040
0.252489	0.0136677	-2040
0.354344	0.0158292	-2040
0.218404	0.0275528	-2040
0.155459	0.0294441	-2040
0.252575	0.0332927	-2040
0.283345	0.0367261	-2040
0.172277	0.0393423	-2040
0.338913	0.0417543	-2040
0.388244	0.0505585	-2040
0.342479	0.0515734	-2040
0.159448	0.0524103	-2040
0.0673345	0.058651	-2040
0.225887	0.0596922	-2040
0.293375	0.0769053	-2040
0.336807	0.0833372	-2040
0.193134	0.0860325	-2040
0.227476	0.101967	-2040
0.154955	0.10685	-2040
0.1717	0.107338	-2040
0.282381	0.110112	-2040
0.242054	0.126337	-2040
0.283572	0.129164	-2040
0.147019	0.13412	-2040
0.210769	0.139174	-2040
0.257344	0.140209	-2040
0.193287	0.145053	-2040
0.3581	0.153837	-2040
0.179446	0.15841	-2040
0.206564	0.160163	-2040
0.280742	0.169554	-2040
0.123976	0.172823	-2040
0.182178	0.180632	-2040
0.300243	0.184177	-2040
0.254699	0.232416	-2040
0.3091	-0.170684	-1920
0.260536	-0.154737	-1920
0.291891	-0.140096	-1920
0.298435	-0.101588	-1920
0.291542	-0.0712906	-1920
0.343693	-0.0685329	-1920
0.281856	-0.067145	-1920
0.322863	-0.0572393	-1920
0.192409	-0.0367746	-1920
0.16918	-0.0199657	-1920
0.356217	-0.0150219	-1920
0.288614	-0.00392783	-1920
0.245039	0.00224879	-1920
0.311448	0.00486934	-1920
0.214382	0.00546048	-1920
0.375206	0.00701453	-1920
0.146126	0.0117437	-1920
0.265385	0.0158513	-1920
0.24371	0.0204037	-1920
0.0591226	0.0234874	-1920
0.151216	0.027662	-1920
0.197995	0.0293989	-1920
0.275059	0.0316477	-1920
0.276929	0.0449332	-1920
0.289616	0.0496868	-1920
0.115221	0.0563905	-1920
0.19554	0.060882	-1920
0.272165	0.0612354	-1920
0.212462	0.0665009	-1920
0.238822	0.0761604	-1920
0.229542	0.0865877	-1920
0.160784	0.0877151	-1920
0.200208	0.0905063	-1920
0.283039	0.107266	-1920
0.177176	0.116157	-1920
0.320132	0.117407	-1920
0.155727	0.123617	-1920
0.168623	0.1277	-1920
0.19692	0.128449	-1920
0.253441	0.129595	-1920
0.269794	0.138097	-1920
0.220464	0.143374	-1920
0.16628	0.144112	-1920
0.22761	0.144282	-1920
0.244014	0.170969	-1920
0.307698	0.174595	-1920
0.172018	0.204969	-1920
0.311803	0.212039	-1920
0.31265	-0.189459	-1800
0.306595	-0.166479	-1800
0.361509	-0.153069	-1800
0.280024	-0.121716	-1800
0.285698	-0.106552	-1800
0.364516	-0.106408	-1800
0.249188	-0.102496	-1800
0.302137	-0.101471	-1800
0.249463	-0.0770608	-1800
0.341081	-0.0613932	-1800
0.332809	-0.0467059	-1800
0.303085	-0.0234564	-1800
0.315733	-0.00723119	-1800
0.231024	-0.00647569	-1800
0.131415	-0.00214058	-1800
0.206413	0.00836097	-1800
0.28282	0.0115538	-1800
0.152633	0.0221297	-1800
0.179596	0.024513	-1800
0.262129	0.029992	-1800
0.310304	0.032032	-1800
0.327234	0.0360927	-1800
0.175659	0.0431066	-1800
0.299276	0.0461246	-1800
0.146561	0.0532291	-1800
0.350031	0.0544143	-1800
0.200364	0.0561629	-1800
0.253225	0.0573351	-1800
0.232328	0.0592197	-1800
0.186646	0.0711233	-1800
0.20715	0.0735389	-1800
0.189208	0.0832599	-1800
0.274297	0.0873854	-1800
0.223056	0.0948526	-1800
0.15426	0.0955974	-1800
0.208425	0.102721	-1800
0.227812	0.10548	-1800
0.130994	0.123782	-1800
0.176344	0.125246	-1800
0.265925	0.126664	-1800
0.268435	0.138905	-1800
0.184265	0.146709	-1800
0.198767	0.154798	-1800
0.230065	0.162938	-1800
0.156085	0.167148	-1800
0.329445	0.168793	-1800
0.207214	0.1688	-1800
0.285283	0.170328	-1800
0.245538	0.197691	-1800
0.213006	0.20782	-1800
0.240881	0.212366	-1800
0.176484	0.228447	-1800
0.156623	0.256904	-1800
0.0941154	0.300593	-1800
0.28213	-0.291914	-1680
0.314321	-0.288347	-1680
0.32187	-0.279162	-1680
0.279003	-0.246844	-1680
0.329072	-0.244608	-1680
0.289258	-0.242888	-1680
0.264581	-0.224984	-1680
0.350541	-0.203192	-1680
0.244936	-0.19182	-1680
0.186579	-0.156041	-1680
0.209421	-0.147682	-1680
0.22558	-0.134075	-1680
0.281934	-0.126513	-1680
0.346195	-0.0813448	-1680
0.356595	-0.0748423	-1680
0.218504	-0.0729858	-1680
0.324548	-0.0639756	-1680
0.299703	-0.0492404	-1680
0.204908	-0.0367991	-1680
0.249876	-0.0282262	-1680
0.263323	-0.0279346	-1680
0.316128	-0.0184287	-1680
0.248093	-0.0097781	-1680
0.30383	-0.00603598	-1680
0.334382	-5.83187e-05	-1680
0.176999	0.00940559	-1680
0.351707	0.0143392	-1680
0.339149	0.0256114	-1680
0.117851	0.0330449	-1680
0.137005	0.0351489	-1680
0.268972	0.0363362	-1680
0.354609	0.0397132	-1680
0.305232	0.0424703	-1680
0.241554	0.050128	-1680
0.351308	0.0542701	-1680
0.166444	0.0543954	-1680
0.32288	0.0567831	-1680
0.301891	0.0717621	-1680
0.276844	0.0747434	-1680
0.254643	0.0819328	-1680
0.136798	0.0850658	-1680
0.192304	0.0861343	-1680
0.312786	0.0868797	-1680
0.185055	0.0884758	-1680
0.280734	0.0903556	-1680
0.234773	0.0965755	-1680
0.158635	0.0985476	-1680
0.251475	0.10701	-1680
0.299651	0.112484	-1680
0.200995	0.120333	-1680
0.323699	0.123354	-1680
0.263311	0.125722	-1680
0.29122	0.128763	-1680
0.197942	0.134442	-1680
0.324075	0.139033	-1680
0.170414	0.144091	-1680
0.214684	0.151433	-1680
0.233134	0.156313	-1680
0.15261	0.162118	-1680
0.121296	0.162553	-1680
0.249945	0.171048	-1680
0.217875	0.176272	-1680
0.270115	0.18178	-1680
0.22753	0.190691	-1680
0.24665	0.193421	-1680
0.135487	0.202867	-1680
0.218193	0.203988	-1680
0.104208	0.207451	-1680
0.116293	0.212727	-1680
0.140364	0.268356	-1680
0.226976	0.282056	-1680
0.141841	0.298228	-1680
0.205905	-0.367146	-1560
0.134302	-0.35367	-1560
0.203638	-0.34656	-1560
0.210075	-0.331432	-1560
0.158492	-0.328635	-1560
0.176267	-0.311559	-1560
0.150703	-0.311023	-1560
0.220645	-0.29049	-1560
0.185404	-0.288477	-1560
0.259749	-0.274694	-1560
0.221045	-0.262716	-1560
0.301801	-0.245097	-1560
0.273088	-0.242797	-1560
0.231804	-0.235915	-1560
0.154479	-0.234831	-1560
0.1993	-0.226368	-1560
0.210092	-0.225309	-1560
0.104756	-0.220362	-1560
0.167877	-0.206142	-1560
0.258223	-0.195568	-1560
0.135573	-0.193764	-1560
0.159996	-0.181851	-1560
0.188898	-0.181308	-1560
0.185928	-0.16882	-1560
0.249958	-0.166507	-1560
0.193772	-0.157442	-1560
0.179486	-0.150006	-1560
0.187995	-0.138242	-1560
0.106363	-0.135661	-1560
0.257336	-0.126329	-1560
0.195411	-0.122493	-1560
0.126215	-0.120827	-1560
0.15972	-0.11982	-1560
0.171118	-0.114501	-1560
0.21952	-0.1119	-1560
0.200571	-0.106482	-1560
0.12767	-0.0959999	-1560
0.24959	-0.093412	-1560
0.200176	-0.0903732	-1560
0.218552	-0.0854785	-1560
0.238182	-0.0836094	-1560
0.262172	-0.0811065	-1560
0.285654	-0.0796688	-1560
0.272363	-0.0783553	-1560
0.206824	-0.0661347	-1560
0.220283	-0.0658602	-1560
0.172178	-0.0658537	-1560
0.335111	-0.0644617	-1560
0.275182	-0.0611223	-1560
0.179453	-0.0552212	-1560
0.222971	-0.0441051	-1560
0.256135	-0.038119	-1560
0.242737	-0.0374066	-1560
0.142762	-0.0361323	-1560
0.209599	-0.0354853	-1560
0.145975	-0.0265846	-1560
0.275328	-0.0253756	-1560
0.198164	-0.0253299	-1560
0.172156	-0.0202979	-1560
0.28454	-0.0188928	-1560
0.229868	-0.00325446	-1560
0.147403	0.00284296	-1560
0.245879	0.0393389	-1560
0.189915	0.0975068	-1560
0.180714	0.285041	-1560
0.294575	-0.281637	-1440
0.317184	-0.273973	-1440
0.19359	-0.227249	-1440
0.333362	-0.223181	-1440
0.336099	-0.199518	-1440
0.257389	-0.191881	-1440
0.262581	-0.181398	-1440
0.27513	-0.165337	-1440
0.238127	-0.147758	-1440
0.341037	-0.144563	-1440
0.33545	-0.133102	-1440
0.288452	-0.12598	-1440
0.348832	-0.101199	-1440
0.240345	-0.100684	-1440
0.340832	-0.0727877	-1440
0.180723	-0.0641988	-1440
0.213895	-0.0476145	-1440
0.383568	-0.0361887	-1440
0.334487	-0.0332996	-1440
0.349643	-0.0283592	-1440
0.257551	-0.0275387	-1440
0.18221	-0.0150743	-1440
0.225233	-0.0134769	-1440
0.301179	-0.00696542	-1440
0.238987	0.00199372	-1440
0.289842	0.00200003	-1440
0.214101	0.0104102	-1440
0.118883	0.0127194	-1440
0.159985	0.0134134	-1440
0.334006	0.0201012	-1440
0.148913	0.0203157	-1440
0.190816	0.0210413	-1440
0.0286564	0.0221517	-1440
0.175963	0.0323096	-1440
0.266292	0.0387323	-1440
0.0395932	0.04154	-1440
0.205241	0.0449028	-1440
0.151011	0.0455905	-1440
0.311402	0.0473949	-1440
0.125303	0.0497924	-1440
0.164112	0.0534076	-1440
0.248513	0.0591869	-1440
0.188382	0.0601333	-1440
0.265075	0.0613636	-1440
0.311862	0.0643478	-1440
0.195873	0.0669157	-1440
0.219364	0.0708779	-1440
0.143661	0.071717	-1440
0.308725	0.0801461	-1440
0.231199	0.0895973	-1440
0.138035	0.0930611	-1440
0.301682	0.0934018	-1440
0.0633222	0.0942851	-1440
0.316156	0.0973577	-1440
0.132946	0.103673	-1440
0.122058	0.111282	-1440
0.197701	0.111957	-1440
0.169283	0.119907	-1440
0.250617	0.124891	-1440
0.283432	0.12961	-1440
0.243726	0.130342	-1440
0.125947	0.139529	-1440
0.2119	0.142664	-1440
0.225952	0.143756	-1440
0.250276	0.144317	-1440
0.265486	0.153302	-1440
0.168661	0.154936	-1440
0.0698561	0.158198	-1440
0.18029	0.164923	-1440
0.217904	0.165163	-1440
0.0932226	0.174273	-1440
0.19372	0.175643	-1440
0.251563	0.176444	-1440
0.215172	0.182286	-1440
0.278445	0.191636	-1440
0.316286	0.195939	-1440
0.291189	0.201763	-1440
0.202207	0.201845	-1440
0.222788	0.208703	-1440
0.20675	0.213271	-1440
0.187614	0.22069	-1440
0.223837	0.221694	-1440
0.13763	0.226962	-1440
0.237944	0.249227	-1440
0.0250649	0.295524	-1440
0.235447	-0.279909	-1320
0.195423	-0.268333	-1320
0.2642	-0.224079	-1320
0.219026	-0.214554	-1320
0.304544	-0.153053	-1320
0.28613	-0.133356	-1320
0.310963	-0.122356	-1320
0.251708	-0.117999	-1320
0.286936	-0.106764	-1320
0.33344	-0.0999406	-1320
0.228746	-0.0942333	-1320
0.244339	-0.0763913	-1320
0.255346	-0.0740327	-1320
0.327423	-0.0683614	-1320
0.352815	-0.0598635	-1320
0.175513	-0.0536431	-1320
0.112091	-0.048503	-1320
0.257846	-0.0380246	-1320
0.350689	-0.0347389	-1320
0.262803	-0.0252687	-1320
0.289834	-0.0224241	-1320
0.204387	-0.0209837	-1320
0.347035	-0.017806	-1320
0.278656	-0.00648146	-1320
0.241221	0.0034661	-1320
0.263438	0.00605764	-1320
0.285661	0.00772961	-1320
0.150729	0.0122053	-1320
0.339964	0.0169768	-1320
0.237103	0.0236454	-1320
0.176584	0.025491	-1320
0.285473	0.0306162	-1320
0.22889	0.0315808	-1320
0.249959	0.037587	-1320
0.323742	0.0483004	-1320
0.311698	0.0507955	-1320
0.167653	0.0591939	-1320
0.330559	0.0644412	-1320
0.305653	0.0679909	-1320
0.193016	0.0691292	-1320
0.106438	0.0747817	-1320
0.412666	0.0755276	-1320
0.216117	0.0795468	-1320
0.252945	0.086434	-1320
0.178847	0.0865369	-1320
0.280571	0.0882731	-1320
0.219561	0.0911862	-1320
0.0817262	0.09181	-1320
0.0530232	0.104581	-1320
0.136753	0.110935	-1320
0.190212	0.115841	-1320
0.223243	0.117983	-1320
0.141594	0.12678	-1320
0.112643	0.130979	-1320
0.12286	0.132857	-1320
0.270525	0.133705	-1320
0.219103	0.136901	-1320
0.254198	0.139223	-1320
0.121855	0.146657	-1320
0.206987	0.158888	-1320
0.23967	0.168534	-1320
0.197018	0.170071	-1320
0.262174	0.171736	-1320
0.278474	0.175595	-1320
0.222415	0.177582	-1320
0.210851	0.18971	-1320
0.262306	0.195054	-1320
0.226671	0.199278	-1320
0.231451	0.207497	-1320
0.181635	0.211799	-1320
0.254247	0.214461	-1320
0.162624	0.224165	-1320
0.110269	0.265224	-1320
0.21007	-0.295805	-1200
0.288577	-0.285786	-1200
0.260941	-0.244399	-1200
0.266275	-0.203588	-1200
0.173173	-0.173331	-1200
0.367031	-0.1686	-1200
0.377239	-0.166295	-1200
0.318983	-0.153962	-1200
0.402246	-0.149292	-1200
0.382376	-0.148311	-1200
0.236459	-0.123292	-1200
0.27259	-0.120428	-1200
0.305615	-0.115912	-1200
0.344906	-0.0953479	-1200
0.269376	-0.0688834	-1200
0.245473	-0.066501	-1200
0.235131	-0.0618566	-1200
0.295631	-0.0396838	-1200
0.244573	-0.0310573	-1200
0.039816	-0.0173993	-1200
0.184694	-0.00883296	-1200
0.287196	-0.00733644	-1200
0.194045	0.0105786	-1200
0.269409	0.0116462	-1200
0.249763	0.0125237	-1200
0.302005	0.0126157	-1200
0.131424	0.0139166	-1200
0.0723372	0.0166778	-1200
0.142612	0.0179357	-1200
0.327413	0.0189236	-1200
0.305368	0.0327972	-1200
0.329743	0.0390315	-1200
0.226438	0.0396942	-1200
0.16522	0.0418602	-1200
0.0736708	0.0505427	-1200
0.310435	0.0513895	-1200
0.098608	0.0544575	-1200
0.210858	0.0599186	-1200
0.323455	0.0601395	-1200
0.119282	0.0606856	-1200
0.230487	0.0717796	-1200
0.174555	0.0745041	-1200
0.317794	0.0750195	-1200
0.188186	0.0751238	-1200
0.251771	0.075222	-1200
0.282868	0.0783882	-1200
0.204484	0.0798056	-1200
0.138863	0.087985	-1200
0.187747	0.0912862	-1200
0.236614	0.0917648	-1200
0.16703	0.0993858	-1200
0.0955658	0.100773	-1200
0.239324	0.106185	-1200
0.159392	0.109872	-1200
0.0956569	0.113315	-1200
0.297495	0.115002	-1200
0.243181	0.116278	-1200
0.120953	0.116653	-1200
0.173495	0.12158	-1200
0.237498	0.128827	-1200
0.129812	0.13179	-1200
0.170115	0.135276	-1200
0.324623	0.136441	-1200
0.196664	0.137491	-1200
0.106963	0.13792	-1200
0.208346	0.141025	-1200
0.232769	0.141473	-1200
0.225217	0.14421	-1200
0.198405	0.147726	-1200
0.213177	0.149462	-1200
0.161396	0.149861	-1200
0.206514	0.152745	-1200
0.235377	0.156991	-1200
0.172723	0.160305	-1200
0.313718	0.167619	-1200
0.0789999	0.16865	-1200
0.259998	0.169048	-1200
0.163522	0.169742	-1200
0.300494	0.172564	-1200
0.140266	0.179326	-1200
0.234729	0.180057	-1200
0.264433	0.187831	-1200
0.172022	0.189126	-1200
0.211002	0.195777	-1200
0.247149	0.200171	-1200
0.256335	0.201692	-1200
0.113996	0.21359	-1200
0.12617	0.22593	-1200
0.185395	0.229022	-1200
0.15476	0.240638	-1200
0.129533	0.25083	-1200
0.252403	0.277381	-1200
0.116727	0.277841	-1200
0.265118	-0.292365	-1080
0.319618	-0.28381	-1080
0.35623	-0.281947	-1080
0.258689	-0.232038	-1080
0.393622	-0.204857	-1080
0.26294	-0.193086	-1080
0.287808	-0.155818	-1080
0.358773	-0.155773	-1080
0.262891	-0.127222	-1080
0.363111	-0.126828	-1080
0.382587	-0.125206	-1080
0.180079	-0.123997	-1080
0.225324	-0.0983928	-1080
0.336382	-0.0941016	-1080
0.227534	-0.0742224	-1080
0.212647	-0.0597094	-1080
0.242018	-0.0484842	-1080
0.194235	-0.0365602	-1080
0.262935	-0.031185	-1080
0.316949	-0.0237762	-1080
0.162922	-0.021241	-1080
0.130583	-0.0136799	-1080
0.167517	-0.00324303	-1080
0.257772	0.000407015	-1080
0.323776	0.00235704	-1080
0.249619	0.0120464	-1080
0.118119	0.0134376	-1080
0.288108	0.0206667	-1080
0.333648	0.0229144	-1080
0.369534	0.0280233	-1080
0.129721	0.0292383	-1080
0.204402	0.0345963	-1080
0.247011	0.0356047	-1080
0.108891	0.036036	-1080
0.164259	0.0382959	-1080
0.230732	0.0407258	-1080
0.263573	0.0424632	-1080
0.148177	0.0429188	-1080
0.0919251	0.0484105	-1080
0.303487	0.0490848	-1080
0.319105	0.0491152	-1080
0.206639	0.0541999	-1080
0.190655	0.054534	-1080
0.225319	0.0561377	-1080
0.18588	0.0637374	-1080
0.283383	0.0676739	-1080
0.0962199	0.0706688	-1080
0.258875	0.0732141	-1080
0.234809	0.0822171	-1080
0.155964	0.0865485	-1080
0.26013	0.0915541	-1080
0.174366	0.0924411	-1080
0.202273	0.0984369	-1080
0.316731	0.0998402	-1080
0.105753	0.101559	-1080
0.264381	0.110842	-1080
0.298084	0.111935	-1080
0.119298	0.112397	-1080
0.225766	0.114645	-1080
0.125006	0.123149	-1080
0.225886	0.126327	-1080
0.258143	0.131685	-1080
0.205804	0.137377	-1080
0.334085	0.14005	-1080
0.221663	0.143591	-1080
0.0837667	0.145511	-1080
0.204958	0.149921	-1080
0.232528	0.152339	-1080
0.0550514	0.155407	-1080
0.255311	0.159015	-1080
0.0851201	0.163322	-1080
0.140024	0.169695	-1080
0.167271	0.175168	-1080
0.241079	0.175703	-1080
0.205177	0.179202	-1080
0.130081	0.181298	-1080
0.20295	0.197639	-1080
0.238181	0.197755	-1080
0.0955923	0.204158	-1080
0.178442	0.206721	-1080
0.157842	0.207705	-1080
0.213073	0.212049	-1080
0.302766	0.212104	-1080
0.251404	0.213549	-1080
0.14409	0.220007	-1080
0.198683	0.220335	-1080
0.265489	0.225268	-1080
0.215218	0.229812	-1080
0.159413	0.231598	-1080
0.179474	0.246487	-1080
0.243318	-0.247905	-960
0.148066	-0.240252	-960
0.355361	-0.225478	-960
0.269409	-0.221465	-960
0.212023	-0.214149	-960
0.256481	-0.188746	-960
0.18245	-0.185043	-960
0.232443	-0.183218	-960
0.282605	-0.15491	-960
0.312031	-0.13669	-960
0.327989	-0.134777	-960
0.321315	-0.10312	-960
0.214415	-0.0965562	-960
0.258938	-0.0960159	-960
0.238518	-0.0540134	-960
0.18415	-0.0469362	-960
0.151341	-0.030904	-960
0.197307	-0.0301334	-960
0.341092	-0.0232511	-960
0.377573	-0.0222945	-960
0.299968	-0.0166522	-960
0.201257	-0.0121083	-960
0.316106	-0.010257	-960
0.357376	-0.00701518	-960
0.17667	0.00618364	-960
0.128033	0.00854797	-960
0.244604	0.0176039	-960
0.183921	0.0273059	-960
0.224995	0.0280584	-960
0.273354	0.0286291	-960
0.146999	0.0306485	-960
0.321631	0.0428026	-960
0.141452	0.0502342	-960
0.176201	0.0529121	-960
0.14325	0.0618928	-960
0.196632	0.0631032	-960
0.259003	0.0797853	-960
0.275931	0.0798292	-960
0.188176	0.0803811	-960
0.331018	0.0922717	-960
0.255151	0.0945671	-960
0.216169	0.0963481	-960
0.289633	0.101227	-960
0.230296	0.104093	-960
0.15322	0.112058	-960
0.195815	0.114241	-960
0.16969	0.114448	-960
0.235271	0.116028	-960
0.0816362	0.117332	-960
0.0928813	0.118831	-960
0.263493	0.121547	-960
0.138439	0.123021	-960
0.110441	0.12309	-960
0.193793	0.12541	-960
0.286778	0.127561	-960
0.2081	0.128539	-960
0.128104	0.130258	-960
0.0965698	0.134899	-960
0.147625	0.139006	-960
0.2676	0.139696	-960
0.107477	0.148094	-960
0.204919	0.155689	-960
0.259902	0.15752	-960
0.327847	0.164757	-960
0.213434	0.166638	-960
0.251937	0.168194	-960
0.178462	0.170727	-960
0.256742	0.175337	-960
0.307078	0.18137	-960
0.215352	0.181502	-960
0.12258	0.18258	-960
0.0622133	0.194929	-960
0.256399	0.202555	-960
0.0936223	0.206694	-960
0.110419	0.213116	-960
0.142978	0.216233	-960
0.151771	0.232438	-960
0.156157	0.245427	-960
0.109907	0.246066	-960
0.191843	0.247691	-960
0.239114	-0.317186	-840
0.384909	-0.291288	-840
0.237582	-0.23594	-840
0.37429	-0.231914	-840
0.306216	-0.220898	-840
0.256481	-0.201031	-840
0.196699	-0.200483	-840
0.384156	-0.192356	-840
0.244298	-0.185358	-840
0.225068	-0.184229	-840
0.260458	-0.182595	-840
0.299564	-0.155005	-840
0.352519	-0.144604	-840
0.278978	-0.141033	-840
0.230044	-0.140452	-840
0.235543	-0.122236	-840
0.230044	-0.105493	-840
0.296708	-0.103135	-840
0.255958	-0.101913	-840
0.37658	-0.0787448	-840
0.307679	-0.0710809	-840
0.173155	-0.0681753	-840
0.285935	-0.062819	-840
0.216767	-0.0516431	-840
0.191205	-0.0509357	-840
0.334613	-0.0460257	-840
0.240502	-0.0440971	-840
0.14715	-0.020002	-840
0.269182	-0.0161785	-840
0.211983	-0.00581111	-840
0.22312	-0.00147383	-840
0.283927	0.00298715	-840
0.157865	0.00978549	-840
0.232815	0.0182577	-840
0.279272	0.0188628	-840
0.19372	0.0188757	-840
0.245323	0.0195388	-840
0.248575	0.0333801	-840
0.314118	0.0392192	-840
0.261863	0.0434939	-840
0.132447	0.0484768	-840
0.0463932	0.0551206	-840
0.287558	0.0579533	-840
0.196085	0.0598074	-840
0.202747	0.0672431	-840
0.223141	0.068904	-840
0.240129	0.0724963	-840
0.171441	0.0736229	-840
0.152345	0.0769577	-840
0.27065	0.0826617	-840
0.243481	0.0845093	-840
0.224417	0.0848956	-840
0.119175	0.0931489	-840
0.21509	0.0954279	-840
0.185151	0.0971274	-840
0.13202	0.099812	-840
0.159152	0.107969	-840
0.300093	0.108458	-840
0.133435	0.109713	-840
0.0925621	0.118102	-840
0.0835878	0.129123	-840
0.228357	0.13072	-840
0.177303	0.131164	-840
0.117147	0.131892	-840
0.252499	0.140093	-840
0.238538	0.15987	-840
0.224983	0.162014	-840
0.147487	0.163521	-840
0.197686	0.171755	-840
0.208219	0.180208	-840
0.189315	0.180658	-840
0.215181	0.188944	-840
0.233402	0.189381	-840
0.0871541	0.190102	-840
0.133141	0.195826	-840
0.199752	0.196096	-840
0.185866	0.197738	-840
0.215806	0.201852	-840
0.157433	0.204633	-840
0.182588	0.223264	-840
0.219521	0.228826	-840
0.105717	0.233429	-840
0.147358	0.249318	-840
0.11475	0.255659	-840
0.15582	0.266191	-840
0.318829	-0.29075	-720
0.190209	-0.264061	-720
0.210892	-0.224863	-720
0.312154	-0.18927	-720
0.220134	-0.179201	-720
0.212941	-0.164325	-720
0.225275	-0.150409	-720
0.345861	-0.147178	-720
0.237117	-0.143873	-720
0.356882	-0.137299	-720
0.308485	-0.118891	-720
0.254284	-0.0959029	-720
0.226082	-0.093807	-720
0.200295	-0.0877687	-720
0.339485	-0.0871311	-720
0.239323	-0.0781542	-720
0.196224	-0.0725995	-720
0.230424	-0.0652348	-720
0.227369	-0.0567561	-720
0.320683	-0.0522054	-720
0.269903	-0.0465847	-720
0.165789	-0.0458226	-720
0.231408	-0.0152571	-720
0.311093	-0.00270407	-720
0.145088	0.00444086	-720
0.226164	0.00700418	-720
0.0388297	0.0151935	-720
0.19854	0.0162987	-720
0.294671	0.0222443	-720
0.130917	0.0235359	-720
0.0351832	0.0242883	-720
0.32692	0.0256731	-720
0.19719	0.0286226	-720
0.281863	0.0366654	-720
0.228366	0.0388093	-720
0.154651	0.0500213	-720
0.209077	0.0520919	-720
0.265783	0.0527844	-720
0.0831201	0.0531838	-720
0.338189	0.0542291	-720
0.108952	0.056646	-720
0.280784	0.060947	-720
0.249135	0.0638699	-720
0.0518316	0.0741764	-720
0.187203	0.0785906	-720
0.289882	0.0798623	-720
0.125515	0.0855882	-720
0.226358	0.0897028	-720
0.04624	0.0901222	-720
0.302072	0.0902953	-720
0.183159	0.0930717	-720
0.332345	0.100023	-720
0.259375	0.100296	-720
0.275378	0.103052	-720
0.250222	0.103152	-720
0.203779	0.10714	-720
0.281064	0.110249	-720
0.310019	0.111874	-720
0.236611	0.113958	-720
0.369676	0.114777	-720
0.096456	0.115576	-720
0.0628839	0.117393	-720
0.225988	0.127074	-720
0.0628974	0.128479	-720
0.176688	0.129198	-720
0.0909591	0.129537	-720
0.391731	0.138406	-720
0.210124	0.138672	-720
0.246549	0.1477	-720
0.151031	0.148726	-720
0.177541	0.154305	-720
0.220725	0.154365	-720
0.23018	0.164458	-720
0.189121	0.165424	-720
0.15521	0.167728	-720
0.102079	0.167741	-720
0.20678	0.172055	-720
0.189595	0.18874	-720
0.163356	0.188773	-720
0.126824	0.191357	-720
0.0538715	0.192235	-720
0.148346	0.194366	-720
0.119815	0.205112	-720
0.0470839	0.20659	-720
0.140128	0.210991	-720
0.0609253	0.212576	-720
0.152485	0.215592	-720
0.126039	0.222057	-720
0.0541061	0.223428	-720
0.0969659	0.233362	-720
0.0701588	0.239887	-720
0.0962303	0.271492	-720
0.0525807	0.331107	-720
0.394211	-0.205181	-600
0.247367	-0.189004	-600
0.359808	-0.152709	-600
0.313784	-0.124475	-600
0.302631	-0.119878	-600
0.252208	-0.117798	-600
0.320834	-0.0999163	-600
0.36814	-0.0968357	-600
0.176801	-0.0940757	-600
0.343746	-0.0630038	-600
0.191682	-0.0407985	-600
0.328285	-0.0398993	-600
0.245306	-0.0351064	-600
0.282012	-0.0229716	-600
0.260498	-0.0189997	-600
0.280578	0.00243025	-600
0.263772	0.0043921	-600
0.213508	0.00561401	-600
0.205029	0.00659833	-600
0.0333163	0.0120902	-600
0.190743	0.0133935	-600
0.230525	0.014534	-600
0.183498	0.0159799	-600
0.254022	0.0175888	-600
0.195252	0.034519	-600
0.32114	0.0351232	-600
0.231711	0.0470029	-600
0.190195	0.0485303	-600
0.29808	0.0497251	-600
0.321388	0.0585772	-600
0.0800424	0.0588826	-600
0.172071	0.0610142	-600
0.28331	0.0815084	-600
0.266114	0.0857783	-600
0.292833	0.0858258	-600
0.144402	0.0927093	-600
0.295164	0.0973525	-600
0.178805	0.104494	-600
0.319658	0.105254	-600
0.091923	0.108418	-600
0.31149	0.108839	-600
0.242569	0.110536	-600
0.157596	0.112844	-600
0.274604	0.117046	-600
0.214842	0.119992	-600
0.167931	0.129136	-600
0.2592	0.13623	-600
0.215079	0.140187	-600
0.0982087	0.144654	-600
0.228769	0.144885	-600
0.205181	0.153038	-600
0.240233	0.155135	-600
0.366099	0.156459	-600
0.16887	0.161679	-600
0.214969	0.172263	-600
0.231105	0.172487	-600
0.201617	0.176363	-600
0.262269	0.192994	-600
0.28061	0.222388	-600
0.168939	0.226468	-600
0.2616	0.23754	-600
0.198411	0.243514	-600
0.22729	-0.131446	-480
0.365579	-0.131228	-480
0.2583	-0.131048	-480
0.28704	-0.130589	-480
0.21008	-0.106008	-480
0.276613	-0.0827184	-480
0.339346	-0.067072	-480
0.257383	-0.0508695	-480
0.16565	-0.0478409	-480
0.271048	-0.0347948	-480
0.178959	-0.0305262	-480
0.167329	-0.00523049	-480
0.137021	0.000801001	-480
0.211454	0.001602	-480
0.34495	0.00201712	-480
0.230037	0.00533806	-480
0.142395	0.00701022	-480
0.190946	0.00701022	-480
0.273936	0.00895718	-480
0.320041	0.0172011	-480
0.186058	0.0179261	-480
0.0651641	0.023077	-480
0.0910212	0.0284735	-480
0.313047	0.0319757	-480
0.174984	0.0321219	-480
0.347602	0.0341156	-480
0.26968	0.0389158	-480
0.134248	0.0440317	-480
0.103774	0.0441194	-480
0.213334	0.044973	-480
0.118362	0.0466744	-480
0.153283	0.0473	-480
0.304676	0.0509191	-480
0.166768	0.0577188	-480
0.217419	0.0597652	-480
0.119124	0.0616186	-480
0.139382	0.0638345	-480
0.280292	0.066372	-480
0.202305	0.0735868	-480
0.242665	0.0751187	-480
0.225716	0.0770247	-480
0.0890461	0.0777789	-480
0.187903	0.0785039	-480
0.288629	0.0788431	-480
0.0376377	0.0828013	-480
0.319424	0.0868764	-480
0.133938	0.0904488	-480
0.217555	0.0919046	-480
0.0467563	0.0933663	-480
0.242845	0.093682	-480
0.233641	0.0958395	-480
0.222267	0.0990493	-480
0.0788496	0.100938	-480
0.121049	0.101423	-480
0.207609	0.105276	-480
0.175641	0.112064	-480
0.246775	0.122495	-480
0.209063	0.122992	-480
0.256932	0.12864	-480
0.182032	0.12885	-480
0.110923	0.129669	-480
0.158817	0.130148	-480
0.215058	0.132498	-480
0.0779774	0.132954	-480
0.100746	0.134182	-480
0.265935	0.13503	-480
0.12143	0.139725	-480
0.170653	0.145537	-480
0.0133296	0.14808	-480
0.222522	0.151185	-480
0.0760373	0.152968	-480
0.17133	0.153126	-480
0.232473	0.15699	-480
0.170768	0.17287	-480
0.0826194	0.175022	-480
0.191061	0.175022	-480
0.247176	0.175589	-480
0.165154	0.184832	-480
0.215399	0.195023	-480
0.231075	0.198163	-480
0.307944	0.205594	-480
0.269925	0.207909	-480
0.238038	0.212254	-480
0.0871111	0.225075	-480
0.185917	0.23885	-480
0.200993	-0.240565	-360
0.277088	-0.237619	-360
0.243394	-0.227712	-360
0.351695	-0.196749	-360
0.212305	-0.193589	-360
-0.0870752	-0.160725	-360
0.337129	-0.155543	-360
0.218769	-0.153062	-360
0.255937	-0.125831	-360
0.286601	-0.115123	-360
0.26822	-0.0957756	-360
0.231577	-0.0940279	-360
0.355695	-0.0906774	-360
0.207353	-0.0818546	-360
0.156074	-0.0722915	-360
0.406578	-0.0665446	-360
0.246108	-0.056287	-360
0.347213	-0.0549361	-360
0.171251	-0.0480443	-360
0.188861	-0.046182	-360
0.227817	-0.036535	-360
0.2785	-0.035436	-360
0.185481	-0.0286358	-360
0.24406	-0.0268804	-360
0.26836	-0.0213165	-360
0.324791	-0.0207899	-360
0.228969	-0.0102957	-360
0.315923	-0.0100134	-360
0.153841	-0.00493799	-360
0.108871	-0.00418241	-360
0.256198	-0.00057241	-360
0.17091	0.0064946	-360
0.33071	0.0141318	-360
0.0472077	0.0146369	-360
0.0996931	0.0267842	-360
0.183654	0.0272713	-360
0.237531	0.0283958	-360
0.158182	0.0302059	-360
0.1465	0.031144	-360
0.0266482	0.0329721	-360
0.170229	0.0332006	-360
0.193748	0.0368569	-360
0.282781	0.0371575	-360
0.205114	0.0380114	-360
0.24772	0.0426298	-360
0.158122	0.0427561	-360
0.097555	0.0450052	-360
0.21588	0.0629976	-360
0.0053677	0.064068	-360
0.0778417	0.0724509	-360
0.199712	0.076089	-360
0.235218	0.0782299	-360
0.218644	0.0822469	-360
0.11171	0.0861316	-360
0.14622	0.0868352	-360
0.259923	0.0878154	-360
0.173975	0.0913393	-360
0.104645	0.100648	-360
0.248296	0.101851	-360
0.210808	0.103601	-360
0.221808	0.10846	-360
0.126707	0.11217	-360
0.279281	0.113265	-360
0.137347	0.115231	-360
0.202115	0.119074	-360
0.217542	0.124799	-360
0.190849	0.126152	-360
0.109117	0.127655	-360
0.253253	0.131552	-360
0.227992	0.133446	-360
0.0862988	0.134937	-360
0.213276	0.147012	-360
0.103198	0.148131	-360
0.176293	0.167573	-360
0.219605	0.168336	-360
-0.100727	0.175303	-360
0.0846965	0.186094	-360
0.241451	0.186467	-360
0.134248	0.187928	-360
0.200508	0.206673	-360
0.114314	0.21526	-360
0.0898189	0.216499	-360
0.0730799	0.23392	-360
0.177595	0.251022	-360
0.190058	0.255136	-360
0.129421	0.337106	-360
0.292763	-0.359207	-240
0.242498	-0.309138	-240
0.222625	-0.298672	-240
0.351729	-0.293928	-240
0.394543	-0.270589	-240
0.360912	-0.212094	-240
0.211504	-0.196423	-240
0.375204	-0.195665	-240
0.359275	-0.183027	-240
0.329006	-0.145956	-240
0.376375	-0.126939	-240
0.342179	-0.126048	-240
0.166296	-0.107986	-240
0.399176	-0.0842641	-240
0.173339	-0.0807782	-240
0.344521	-0.0777456	-240
0.357466	-0.0756509	-240
0.39345	-0.0641692	-240
0.289851	-0.0560953	-240
0.352149	-0.0552121	-240
0.290167	-0.0291771	-240
0.19444	-0.0260897	-240
0.388335	-0.0156945	-240
0.109081	-0.0147253	-240
0.359834	-0.0078238	-240
0.304055	-0.0032749	-240
0.0419433	0.000920947	-240
0.120425	0.00949284	-240
0.100744	0.0103751	-240
0.221806	0.0138335	-240
0.189356	0.0181162	-240
0.156481	0.0201835	-240
0.171354	0.0214329	-240
0.25836	0.0221864	-240
0.121902	0.0276606	-240
0.111045	0.0375012	-240
0.0944423	0.0446949	-240
0.16741	0.0457962	-240
0.0238321	0.0479923	-240
0.263982	0.048559	-240
0.197684	0.049641	-240
0.151517	0.0498406	-240
0.220687	0.0530993	-240
0.18392	0.0537434	-240
0.171266	0.0608984	-240
0.125933	0.0609757	-240
-0.017753	0.0614346	-240
0.106371	0.0651554	-240
0.0791761	0.0690517	-240
0.137101	0.0750668	-240
0.225568	0.0879665	-240
0.172499	0.0881275	-240
0.138339	0.0939881	-240
0.293209	0.0970214	-240
0.116253	0.100866	-240
0.29111	0.103964	-240
0.202005	0.105123	-240
0.151242	0.106166	-240
0.221718	0.107622	-240
0.0233968	0.107731	-240
0.0999611	0.122087	-240
0.305983	0.125597	-240
0.218578	0.126833	-240
0.21964	0.137917	-240
0.315543	0.140222	-240
0.13894	0.143256	-240
0.1768	0.144872	-240
0.102557	0.149245	-240
0.227066	0.157321	-240
0.044384	0.173441	-240
0.1072	0.182483	-240
0.128592	0.18274	-240
0.162674	0.188517	-240
0.0750149	0.19137	-240
0.309631	0.202364	-240
0.163177	0.208823	-240
0.118813	0.211489	-240
0.0759269	0.21411	-240
0.197673	0.21554	-240
0.256002	0.219713	-240
0.166742	0.225123	-240
0.240653	0.23072	-240
0.15517	0.235582	-240
0.26064	0.240316	-240
0.131074	0.269986	-240
0.274594	-0.328071	-120
0.320731	-0.300866	-120
0.201752	-0.299633	-120
0.338091	-0.286039	-120
0.377872	-0.263274	-120
0.215046	-0.262073	-120
0.245946	-0.246279	-120
0.201334	-0.242596	-120
0.360277	-0.242484	-120
0.350059	-0.221129	-120
0.292077	-0.211225	-120
0.381082	-0.201459	-120
0.334764	-0.188033	-120
0.269282	-0.17099	-120
0.39022	-0.165954	-120
0.325428	-0.161981	-120
0.194866	-0.16194	-120
0.210081	-0.158306	-120
0.335079	-0.149506	-120
0.250927	-0.132189	-120
0.362213	-0.130497	-120
0.335432	-0.125364	-120
0.296978	-0.114437	-120
0.352605	-0.10633	-120
0.0583663	-0.0995447	-120
0.275793	-0.0962811	-120
0.245695	-0.0747895	-120
0.013337	-0.0669648	-120
0.214623	-0.0643297	-120
0.195241	-0.0617188	-120
0.350048	-0.0569402	-120
0.311075	-0.0263991	-120
0.216576	-0.0144486	-120
0.27545	-0.0111366	-120
0.186911	-0.0111286	-120
0.108296	-0.00751038	-120
0.173216	-0.00561666	-120
0.249279	0.0101248	-120
0.163731	0.0140895	-120
0.122751	0.016001	-120
0.301734	0.0279022	-120
0.190859	0.0333934	-120
0.204571	0.0354062	-120
0.154293	0.0358588	-120
0.170124	0.0417418	-120
0.0868165	0.0466117	-120
0.220428	0.0491851	-120
0.0358383	0.0504954	-120
0.0673753	0.0547507	-120
0.115598	0.0552235	-120
0.193117	0.0592963	-120
0.108285	0.0620251	-120
0.263082	0.0634367	-120
0.258764	0.0728523	-120
0.106081	0.0748178	-120
0.293335	0.0776546	-120
0.310984	0.0779653	-120
0.0622074	0.0874822	-120
0.173109	0.0889006	-120
0.0944667	0.0897044	-120
0.266019	0.0905622	-120
0.126624	0.096148	-120
0.235231	0.0967491	-120
0.0552901	0.0995725	-120
0.136965	0.102045	-120
0.117118	0.105584	-120
0.329317	0.107536	-120
0.223177	0.10969	-120
0.304543	0.110339	-120
0.211146	0.11148	-120
0.122821	0.118626	-120
0.134959	0.118653	-120
0.322518	0.120592	-120
0.19874	0.12503	-120
0.0402251	0.126428	-120
0.182915	0.128359	-120
0.203517	0.132041	-120
0.0989873	0.132858	-120
0.22398	0.133499	-120
0.311454	0.13354	-120
0.167031	0.13408	-120
0.251537	0.136755	-120
0.270149	0.141834	-120
0.237526	0.146529	-120
0.204287	0.149933	-120
0.0820284	0.168183	-120
0.234615	0.168818	-120
0.327985	0.170804	-120
0.337224	0.172033	-120
0.281624	0.172918	-120
0.195278	0.174897	-120
0.0604955	0.178017	-120
0.130235	0.194207	-120
0.122451	0.201475	-120
-0.118588	0.204236	-120
0.241859	0.209189	-120
0.134002	0.210344	-120
0.190506	0.211681	-120
0.136976	0.229121	-120
0.157391	0.23193	-120
0.148671	0.233524	-120
0.17726	0.235983	-120
0.0747046	0.236746	-120
0.308961	0.244102	-120
0.251061	0.249654	-120
0.174489	0.26581	-120
0.156631	0.327335	-120
0.145894	-0.328763	0
0.209337	-0.298955	0
0.31896	-0.296332	0
0.199157	-0.296148	0
0.155752	-0.244169	0
0.20737	-0.200852	0
0.309123	-0.196391	0
0.169908	-0.185847	0
0.323694	-0.180822	0
0.233008	-0.178243	0
0.267105	-0.174022	0
0.262269	-0.169378	0
0.330619	-0.167325	0
0.254301	-0.163098	0
0.247278	-0.162724	0
0.180322	-0.158048	0
0.293005	-0.157896	0
0.140923	-0.15218	0
0.319235	-0.14879	0
0.261591	-0.142327	0
0.168938	-0.111898	0
0.137074	-0.107361	0
0.326525	-0.0985787	0
0.126195	-0.0951062	0
0.287872	-0.0850183	0
0.344144	-0.0837067	0
0.121316	-0.0711412	0
0.0185848	-0.0707039	0
0.137617	-0.0694113	0
0.203081	-0.0671618	0
0.147212	-0.0661162	0
0.106703	-0.0660909	0
0.0845367	-0.0640251	0
0.245646	-0.0351365	0
0.10705	-0.0349021	0
0.30074	-0.0198209	0
0.0346352	-0.0155627	0
0.224086	-0.0155247	0
0.132082	-0.0105631	0
0.142351	-0.00701463	0
0.121037	-0.00441662	0
0.0368306	-0.00351048	0
0.0731908	-0.00326336	0
0.199474	-0.000487919	0
0.157744	0.000912213	0
0.188438	0.0022698	0
0.269177	0.00343958	0
0.111077	0.00764649	0
0.238378	0.00923481	0
0.150361	0.0140695	0
-0.0711305	0.0141857	0
0.0937379	0.0154647	0
0.244595	0.0157276	0
0.0372968	0.0188238	0
0.126114	0.0193389	0
0.15304	0.0216624	0
0.261506	0.0224512	0
0.0663672	0.0225853	0
0.11014	0.0257727	0
0.0792219	0.0309294	0
-0.213217	0.0310884	0
-0.0079847	0.0328805	0
0.196944	0.0363383	0
0.102825	0.0370627	0
0.169531	0.0419886	0
0.150734	0.0439472	0
0.238297	0.0468985	0
0.137714	0.0483097	0
0.204692	0.0492756	0
0.22512	0.0503327	0
0.155668	0.0505205	0
0.305762	0.0507673	0
0.0648032	0.0535576	0
0.18918	0.0544162	0
0.121808	0.0558274	0
0.0854225	0.056525	0
0.329679	0.0582582	0
0.0471805	0.062288	0
0.224794	0.0628568	0
0.127848	0.0646974	0
0.235199	0.0647135	0
0.245193	0.0669135	0
0.100723	0.0679491	0
0.176321	0.0704926	0
0.293687	0.0706643	0
[truncated: 1,499 more rows]
