# Supplementary material for: Spinal premotor interneurons controlling antagonistic muscles are spatially intermingled
Source: eLife. 2022 Dec 13;11:e81976. doi: 10.7554/eLife.81976 (PMC9844990; doi:10.7554/eLife.81976)
Supplement: Figure 12—figure supplement 15—source data 2. [file elife-81976-fig12-figsupp15-data2.xlsx]

## Sheet: Sheet1
0.209283	0.0754253	-5760
0.210767	0.118922	-5760
0.222344	0.124669	-5760
0.167884	0.370558	-5760
0.392239	-0.15524	-5760
0.30973	-0.0948515	-5760
-0.171924	0.284137	-5760
-0.305194	0.345337	-5760
-0.188103	-0.254673	-5760
-0.16476	-0.188371	-5760
-0.153981	-0.172621	-5760
-0.0425459	-0.11284	-5760
-0.289532	-0.085875	-5760
0.180701	0.0152305	-5640
0.245532	0.0732272	-5640
0.200168	0.120981	-5640
0.160415	0.132012	-5640
0.112615	0.136915	-5640
0.154365	-0.472633	-5640
0.214823	-0.0384335	-5640
-0.153977	-0.256178	-5640
0.244929	0.0823846	-5520
0.232478	0.115347	-5520
-0.136205	-0.264054	-5520
-0.0560585	-0.185901	-5520
0.220453	0.0819749	-5400
0.275035	0.103525	-5400
0.18427	0.16522	-5400
0.163163	0.203354	-5400
-0.219561	-0.202039	-5400
-0.096027	-0.158389	-5400
0.282245	0.066195	-5280
0.236748	0.0734113	-5280
0.246246	0.099567	-5280
0.201853	0.143821	-5280
-0.151583	-0.21786	-5280
-0.118797	-0.193625	-5280
-0.238499	-0.111077	-5280
0.289929	0.0141299	-5160
0.263919	0.100866	-5160
0.227196	0.111049	-5160
0.200215	-0.109726	-5160
0.0816478	-0.112221	-5160
0.210124	-0.0590891	-5160
-0.125983	-0.253331	-5160
-0.136387	-0.22877	-5160
-0.102725	-0.152886	-5160
0.165617	0.00963815	-5040
0.22661	0.0474091	-5040
0.441355	0.481915	-5040
0.359737	-0.231417	-5040
-0.445396	0.392747	-5040
-0.153294	-0.160953	-5040
-0.0743303	-0.154154	-5040
0.237674	0.0487354	-4920
0.216284	0.0840605	-4920
0.192274	0.139846	-4920
0.304729	-0.414631	-4920
-0.276697	0.173599	-4920
-0.355847	0.481722	-4920
-0.117438	-0.199	-4920
-0.127283	-0.178148	-4920
0.21531	0.0517049	-4800
0.20303	0.0654273	-4800
0.262639	-0.140109	-4800
0.260802	-0.0698877	-4800
-0.145852	-0.241867	-4800
-0.182938	-0.218397	-4800
-0.132085	-0.141415	-4800
-0.119513	-0.124305	-4800
0.248691	0.019576	-4680
0.264573	0.0601053	-4680
0.224839	0.0762257	-4680
0.270069	0.115091	-4680
0.285935	-0.243633	-4680
-0.110861	-0.213686	-4680
-0.220747	-0.234534	-4680
-0.152559	-0.205051	-4680
-0.110534	-0.162982	-4680
0.324048	0.00661478	-4560
0.275649	0.0357844	-4560
0.338218	-0.429197	-4560
0.0685599	-0.35808	-4560
0.198114	-0.113467	-4560
0.171306	-0.0673173	-4560
0.224106	-0.0514479	-4560
-0.455935	0.357049	-4560
-0.125755	-0.299218	-4560
-0.0983991	-0.248215	-4560
-0.0987489	-0.22529	-4560
-0.189807	-0.130111	-4560
0.258078	0.0157135	-4440
0.288354	0.0599685	-4440
0.200657	0.131172	-4440
0.3956	0.450616	-4440
0.321038	-0.414142	-4440
0.271286	-0.172329	-4440
-0.145514	-0.276038	-4440
-0.156283	-0.217508	-4440
-0.105023	-0.19444	-4440
-0.176562	-0.183124	-4440
-0.158101	-0.178549	-4440
-0.130351	-0.115135	-4440
0.134706	0.0153127	-4320
0.292334	0.0194614	-4320
0.238592	0.0508143	-4320
0.270504	0.111554	-4320
0.293844	-0.253665	-4320
0.350547	-0.170284	-4320
0.277997	-0.16134	-4320
0.326134	-0.160909	-4320
0.312493	-0.131052	-4320
0.275314	-0.115962	-4320
0.217604	-0.0988625	-4320
-0.210152	0.104713	-4320
-0.0900781	-0.214404	-4320
-0.179936	-0.202525	-4320
-0.0870715	-0.180977	-4320
-0.0914113	-0.0481832	-4320
0.174791	0.0164723	-4200
0.0377905	0.0281247	-4200
0.284227	0.187765	-4200
0.0860858	-0.450886	-4200
0.247214	-0.201665	-4200
0.286421	-0.158809	-4200
0.254189	-0.073462	-4200
-0.15905	-0.293032	-4200
-0.148188	-0.204242	-4200
0.0543241	-0.424938	-4080
0.259758	-0.223396	-4080
0.281878	-0.117621	-4080
0.246583	-0.0991577	-4080
0.275737	-0.0862751	-4080
0.246243	-0.0300452	-4080
0.33108	-0.0331781	-4080
0.259658	-0.0256711	-4080
0.252424	-0.013225	-4080
-0.199139	-0.204644	-4080
-0.152766	-0.183196	-4080
-0.123761	-0.105886	-4080
0.123218	0.0206396	-3960
0.240206	0.0433276	-3960
0.205528	0.083397	-3960
0.285042	0.073593	-3960
0.228241	0.0790999	-3960
0.252172	0.199175	-3960
0.106194	-0.507176	-3960
0.133992	-0.163092	-3960
0.274546	-0.0928403	-3960
0.293195	-0.0267735	-3960
-0.344207	0.484309	-3960
-0.165411	-0.323664	-3960
-0.0703398	-0.186566	-3960
-0.151279	-0.181361	-3960
-0.101013	-0.165056	-3960
0.260484	0.0181638	-3840
0.239073	0.0700663	-3840
0.212312	0.106354	-3840
0.12017	0.0857285	-3840
0.18065	0.106824	-3840
0.074697	-0.591479	-3840
0.244611	-0.214338	-3840
0.202831	-0.207674	-3840
0.287306	-0.126822	-3840
0.312357	-0.123945	-3840
0.144693	-0.101188	-3840
0.189239	-0.0316281	-3840
-0.149097	-0.176469	-3840
-0.210042	-0.171925	-3840
-0.136154	-0.112464	-3840
0.191842	0.0189851	-3720
0.254673	0.0265037	-3720
0.257704	0.0697306	-3720
0.180172	0.0797032	-3720
0.206195	0.0793049	-3720
0.137621	0.0918952	-3720
0.218844	0.100829	-3720
0.24486	0.107544	-3720
0.299886	0.118612	-3720
0.287934	0.171065	-3720
0.244026	-0.260829	-3720
0.260417	-0.235687	-3720
0.277598	-0.114098	-3720
0.309445	-0.104822	-3720
0.263108	-0.0730156	-3720
-0.104985	-0.218854	-3720
-0.118569	-0.153195	-3720
-0.208306	-0.128819	-3720
0.173699	0.0141751	-3600
0.242622	0.0879606	-3600
0.224593	0.0849566	-3600
0.248133	0.104402	-3600
0.222842	0.107627	-3600
0.232386	-0.208282	-3600
0.00690994	-0.106503	-3600
0.0993524	-0.0559205	-3600
0.0946417	-0.0391459	-3600
0.038249	-0.0238216	-3600
-0.185508	0.130468	-3600
-0.155164	-0.264937	-3600
-0.107808	-0.227715	-3600
0.174942	0.0245499	-3480
0.280536	0.054242	-3480
0.240126	0.0583909	-3480
0.303276	0.0611154	-3480
0.187404	0.156327	-3480
0.227448	-0.212701	-3480
0.307377	-0.138169	-3480
0.279762	-0.104309	-3480
0.257589	-0.0837495	-3480
0.160342	-0.0718572	-3480
0.246205	-0.0689077	-3480
0.304383	-0.0401444	-3480
-0.129067	-0.240348	-3480
-0.140667	-0.161026	-3480
-0.067593	-0.135234	-3480
0.246159	0.0174684	-3240
0.237134	0.0948703	-3240
0.157797	0.0936435	-3240
0.244011	0.135105	-3240
0.281906	0.143463	-3240
0.0913127	-0.260399	-3240
0.247325	-0.148537	-3240
0.235995	-0.140075	-3240
0.199123	-0.105379	-3240
0.219498	-0.0386948	-3240
0.239701	-0.0368518	-3240
0.187971	-0.039416	-3240
0.209822	-0.0374368	-3240
0.145396	-0.0103769	-3240
0.22903	-0.0110419	-3240
0.25775	-0.0131333	-3240
0.318874	-0.00556103	-3240
0.247023	-0.00235583	-3240
-0.150925	-0.240479	-3240
-0.0828245	-0.197353	-3240
-0.114225	-0.1549	-3240
0.185348	0.0297842	-3120
0.195731	0.0395986	-3120
0.273135	0.0966398	-3120
0.245548	0.100885	-3120
0.0683351	0.0849334	-3120
0.280758	-0.277279	-3120
0.26529	-0.259398	-3120
0.17743	-0.139361	-3120
0.315727	-0.0772538	-3120
0.272207	-0.0704185	-3120
0.224783	-0.0725959	-3120
0.184119	-0.0643569	-3120
0.287905	-0.0624028	-3120
0.24121	-0.0503513	-3120
0.144317	-0.0323738	-3120
-0.0617237	-0.321154	-3120
-0.0892578	-0.244425	-3120
-0.0911609	-0.182286	-3120
-0.150767	-0.173892	-3120
-0.107524	-0.169264	-3120
-0.0766844	-0.150106	-3120
0.195775	0.025138	-3000
0.315068	0.031578	-3000
0.19285	0.0974587	-3000
0.235771	0.103176	-3000
0.256814	0.142834	-3000
0.320297	0.212994	-3000
0.170419	-0.510031	-3000
0.299461	-0.325663	-3000
0.235291	-0.233383	-3000
0.272553	-0.153201	-3000
0.339028	-0.117657	-3000
0.199549	-0.135683	-3000
0.275567	-0.122955	-3000
0.297356	-0.121404	-3000
0.198685	-0.0973122	-3000
0.243711	-0.0933628	-3000
0.166076	-0.0681888	-3000
0.168454	-0.047699	-3000
0.241303	-0.027177	-3000
0.0942758	-0.0340419	-3000
0.310835	-0.0101843	-3000
-0.164846	-0.261114	-3000
-0.124216	-0.251483	-3000
-0.152979	-0.239755	-3000
-0.171835	-0.195667	-3000
-0.172036	-0.175498	-3000
-0.0918236	-0.0979083	-3000
0.251426	0.0100954	-2880
0.144807	0.0122308	-2880
0.105091	0.0246217	-2880
0.313743	0.0275222	-2880
0.238964	0.0303575	-2880
0.285371	0.0450083	-2880
0.275708	0.0621267	-2880
0.17443	0.0593211	-2880
0.202319	0.0712078	-2880
0.273227	0.186368	-2880
0.215191	-0.241191	-2880
0.219679	-0.233407	-2880
0.280679	-0.22421	-2880
0.327589	-0.0819101	-2880
0.16445	-0.0595071	-2880
0.328972	-0.0478046	-2880
0.121226	-0.0507283	-2880
0.205324	-0.0440807	-2880
-0.0658688	0.0280773	-2880
-0.146902	-0.309958	-2880
-0.154024	-0.290711	-2880
-0.111343	-0.265527	-2880
-0.125683	-0.206954	-2880
-0.208078	-0.172819	-2880
-0.105449	-0.151614	-2880
-0.250273	-0.12483	-2880
0.235699	0.0201879	-2760
0.248651	0.0171974	-2760
0.214685	0.0445967	-2760
0.200655	0.0519848	-2760
0.230136	0.123052	-2760
0.132209	0.179552	-2760
0.158476	-0.196126	-2760
0.233364	-0.160936	-2760
0.0464572	-0.143769	-2760
0.31411	-0.0787114	-2760
0.229388	-0.0878248	-2760
0.26095	-0.0631093	-2760
0.0445893	-0.0735026	-2760
0.131536	-0.0671525	-2760
0.1732	-0.0628648	-2760
0.284429	-0.0439532	-2760
0.145037	-0.0358424	-2760
0.204741	-0.0361032	-2760
0.0544576	-0.0257589	-2760
-0.191319	-0.249174	-2760
-0.116514	-0.241853	-2760
-0.147258	-0.199344	-2760
-0.203939	-0.196294	-2760
-0.143954	-0.149032	-2760
-0.239258	-0.149387	-2760
-0.129113	-0.120037	-2760
0.280791	0.0072934	-2640
0.214662	0.0218178	-2640
0.162162	0.0402353	-2640
0.144869	0.0528756	-2640
0.182702	0.0613856	-2640
0.316635	0.0838085	-2640
0.244558	0.0976966	-2640
0.304446	0.0989319	-2640
0.201113	0.108016	-2640
0.278366	0.137058	-2640
0.24056	0.138238	-2640
0.299429	0.180482	-2640
0.283296	-0.197151	-2640
0.30466	-0.192067	-2640
0.208185	-0.173131	-2640
0.257069	-0.158178	-2640
0.178315	-0.125373	-2640
0.25431	-0.100591	-2640
0.337838	-0.0757771	-2640
0.273806	-0.0693733	-2640
0.298746	-0.0713298	-2640
0.311886	-0.0448974	-2640
0.248061	-0.041998	-2640
0.0534913	-0.0478753	-2640
0.260538	-0.0271946	-2640
0.209163	-0.00851746	-2640
0.0520849	-0.00492661	-2640
-0.147251	0.17038	-2640
-0.150341	0.182721	-2640
-0.144894	0.200965	-2640
-0.141447	-0.238111	-2640
-0.182319	-0.230005	-2640
-0.152119	-0.135998	-2640
0.150908	0.0277483	-2400
0.201073	0.0319877	-2400
0.0920636	0.0414043	-2400
0.260186	0.0447646	-2400
0.19025	0.047695	-2400
0.235621	0.063194	-2400
0.283112	0.0739195	-2400
0.107783	0.0642945	-2400
0.236896	0.0732617	-2400
0.25903	0.0910464	-2400
0.0963999	0.0925898	-2400
0.260388	0.105445	-2400
0.223059	0.112823	-2400
0.205207	0.122214	-2400
0.216632	0.130478	-2400
0.225316	0.136684	-2400
0.208072	0.164712	-2400
0.205642	0.199832	-2400
0.185348	-0.274872	-2400
0.238564	-0.20136	-2400
0.317666	-0.154072	-2400
0.278591	-0.145541	-2400
0.248296	-0.122141	-2400
0.0943509	-0.118083	-2400
0.135391	-0.120799	-2400
0.201163	-0.103968	-2400
0.278686	-0.0780343	-2400
0.306462	-0.0748619	-2400
0.24732	-0.061344	-2400
0.209103	-0.0589751	-2400
0.357425	-0.0209643	-2400
0.16671	-0.0305312	-2400
0.124473	-0.0209643	-2400
0.17938	-0.013286	-2400
0.295037	-0.0112152	-2400
-0.342057	0.128249	-2400
-0.112886	-0.255374	-2400
-0.143194	-0.263089	-2400
-0.1966	-0.211126	-2400
-0.0775918	-0.185874	-2400
-0.111866	-0.195159	-2400
-0.176677	-0.177512	-2400
-0.147251	-0.171738	-2400
-0.167119	-0.151472	-2400
-0.154827	-0.109819	-2400
0.268899	0.00232748	-2280
0.253723	0.00282224	-2280
0.328753	0.00662704	-2280
0.128225	0.00660613	-2280
0.178118	0.0143412	-2280
0.211861	0.0258461	-2280
0.0586826	0.0213515	-2280
0.25128	0.0322154	-2280
0.300335	0.0340481	-2280
0.229832	0.0499362	-2280
0.259961	0.0668488	-2280
0.176413	0.0682982	-2280
0.21086	0.0742005	-2280
0.0635475	0.0757057	-2280
0.207612	0.106959	-2280
0.282411	0.152722	-2280
0.144619	0.164087	-2280
0.324409	0.203125	-2280
0.193193	-0.279034	-2280
0.256172	-0.222347	-2280
0.312223	-0.187918	-2280
0.315335	-0.164507	-2280
0.312805	-0.0662536	-2280
0.296248	-0.046337	-2280
0.336297	-0.0579015	-2280
0.205528	-0.0424206	-2280
0.2517	-0.0413029	-2280
0.237748	-0.032722	-2280
0.250915	-0.00650391	-2280
0.0705775	-0.0136503	-2280
-0.144311	-0.27667	-2280
-0.19193	-0.255783	-2280
-0.154658	-0.206586	-2280
-0.0609834	-0.149112	-2280
-0.131366	-0.126786	-2280
0.301112	0.00547867	-2160
0.157175	0.00519886	-2160
0.31902	0.0259663	-2160
0.297542	0.0536227	-2160
0.250721	0.0621625	-2160
0.16622	0.0527217	-2160
0.281124	0.080837	-2160
0.24616	0.0825438	-2160
0.110937	0.0891809	-2160
0.186316	0.0956165	-2160
0.264291	0.108566	-2160
0.223173	0.15056	-2160
0.261214	-0.230075	-2160
0.292187	-0.220593	-2160
0.311514	-0.212077	-2160
0.259826	-0.202054	-2160
0.204856	-0.182807	-2160
0.273798	-0.169471	-2160
0.274429	-0.136095	-2160
0.308335	-0.130156	-2160
0.33369	-0.121987	-2160
0.261316	-0.11008	-2160
0.29905	-0.0943336	-2160
0.080631	-0.0936697	-2160
0.299321	-0.0709739	-2160
0.126046	-0.0590812	-2160
0.180925	-0.0620544	-2160
0.237746	-0.0596729	-2160
0.25021	-0.055408	-2160
0.299002	-0.0428297	-2160
0.0501502	-0.0391349	-2160
0.301124	-0.0224937	-2160
0.252716	-0.0145845	-2160
0.125919	-0.0245143	-2160
-0.0915883	-0.186969	-2160
-0.0920691	-0.168081	-2160
-0.137183	-0.162401	-2160
-0.111889	-0.15544	-2160
-0.0971776	-0.124763	-2160
0.0976951	0.0131111	-2040
0.245131	0.0146313	-2040
0.176565	0.0502019	-2040
0.23576	0.0707353	-2040
0.0732505	0.0716502	-2040
0.220097	0.0885034	-2040
0.273403	0.106911	-2040
0.35605	0.118578	-2040
0.178134	0.117298	-2040
0.259321	0.123888	-2040
0.307007	0.143465	-2040
0.143832	0.13583	-2040
0.228757	0.151314	-2040
0.2335	0.17356	-2040
0.33567	0.20706	-2040
0.267188	-0.15544	-2040
0.319303	-0.149407	-2040
0.282556	-0.111874	-2040
0.341155	-0.0877348	-2040
0.3274	-0.089698	-2040
0.234179	-0.0801838	-2040
0.273768	-0.0719095	-2040
0.322791	-0.0492564	-2040
0.126607	-0.0706774	-2040
0.353681	-0.0463632	-2040
0.251019	-0.0280023	-2040
0.338928	-0.0219695	-2040
0.209312	-0.0225656	-2040
0.303013	-0.00883071	-2040
-0.189301	0.221172	-2040
-0.154843	-0.256582	-2040
-0.188918	-0.180352	-2040
-0.11949	-0.114772	-2040
-0.136192	-0.0982323	-2040
0.28798	0.00947355	-1920
0.18912	0.0372617	-1920
0.265802	0.0708578	-1920
0.0863	0.057671	-1920
0.243681	0.08939	-1920
0.214007	0.0890024	-1920
0.289988	0.106032	-1920
0.300564	0.115845	-1920
0.252855	0.12032	-1920
0.191592	0.137234	-1920
0.266178	0.151924	-1920
0.123264	0.154127	-1920
0.205847	0.16492	-1920
0.139034	0.176964	-1920
0.218832	-0.29501	-1920
0.323955	-0.206909	-1920
0.2541	-0.195833	-1920
0.268412	-0.194796	-1920
0.322434	-0.177277	-1920
0.225772	-0.169608	-1920
0.345407	-0.12647	-1920
0.237899	-0.122662	-1920
0.284087	-0.114364	-1920
0.212355	-0.106294	-1920
0.327009	-0.0901073	-1920
0.312028	-0.0923407	-1920
0.146305	-0.0930977	-1920
0.189802	-0.0824078	-1920
0.134403	-0.0646316	-1920
0.152995	-0.0697343	-1920
0.169678	-0.0629358	-1920
0.244194	-0.0508983	-1920
0.139096	-0.0524578	-1920
0.280552	-0.0316231	-1920
0.301089	-0.0336596	-1920
0.263168	-0.027921	-1920
-0.237254	0.199819	-1920
-0.197973	-0.24666	-1920
-0.153337	-0.217878	-1920
-0.142773	-0.193273	-1920
-0.103353	-0.185896	-1920
-0.17738	-0.113041	-1920
-0.08523	-0.107241	-1920
-0.0646016	-0.0287509	-1920
0.303652	0.000958112	-1800
0.323472	0.00530753	-1800
0.158361	0.00428049	-1800
0.314211	0.0163017	-1800
0.184493	0.0140891	-1800
0.267906	0.034685	-1800
0.0812483	0.0295429	-1800
0.106083	0.0411643	-1800
0.175535	0.0466787	-1800
0.29559	0.0523102	-1800
0.202725	0.057597	-1800
0.283572	0.0789167	-1800
0.190163	0.077931	-1800
0.267164	0.105165	-1800
0.0918758	0.102711	-1800
0.141359	0.110004	-1800
0.31865	0.118441	-1800
0.250274	0.120309	-1800
0.154806	0.186025	-1800
0.255053	0.197281	-1800
0.287374	-0.217984	-1800
0.286199	-0.177349	-1800
0.316122	-0.145883	-1800
0.301105	-0.108539	-1800
0.322792	-0.0938975	-1800
0.206911	-0.10178	-1800
0.33185	-0.102314	-1800
0.257427	-0.0956439	-1800
0.350193	-0.074979	-1800
0.0147449	-0.0834923	-1800
0.27797	-0.0760462	-1800
0.171368	-0.0480483	-1800
0.344214	-0.042203	-1800
0.178194	-0.0342475	-1800
0.191238	-0.0297442	-1800
0.253884	-0.0211662	-1800
0.0507261	-0.02858	-1800
0.286545	-0.00870739	-1800
-0.244298	0.0588423	-1800
-0.17105	-0.249213	-1800
-0.1134	-0.236453	-1800
-0.0926261	-0.221994	-1800
-0.179793	-0.178507	-1800
-0.129035	-0.157352	-1800
-0.110492	-0.152947	-1800
-0.0960321	-0.145273	-1800
-0.159719	-0.150175	-1800
-0.129539	-0.141284	-1800
-0.194517	-0.130126	-1800
-0.214345	-0.0673977	-1800
-0.0579697	-0.026714	-1800
0.292284	0.047226	-1680
0.309961	0.0505968	-1680
0.0965455	0.0414993	-1680
0.137054	0.0772435	-1680
0.189343	0.09106	-1680
0.303474	0.0953746	-1680
0.276036	0.0984118	-1680
0.205955	0.108084	-1680
0.12464	0.124455	-1680
0.147836	0.128855	-1680
0.137833	0.138946	-1680
0.338098	0.146064	-1680
0.242167	0.202692	-1680
0.181663	0.199655	-1680
0.224782	-0.289211	-1680
0.220729	-0.23822	-1680
0.245599	-0.22946	-1680
0.218898	-0.222349	-1680
0.328417	-0.209899	-1680
0.299732	-0.203399	-1680
0.295655	-0.182944	-1680
0.337203	-0.180691	-1680
0.303291	-0.155547	-1680
0.279754	-0.142333	-1680
0.263021	-0.132603	-1680
0.180477	-0.123154	-1680
0.201951	-0.105602	-1680
0.169469	-0.0777926	-1680
0.284257	-0.0652282	-1680
0.141027	-0.0684285	-1680
0.333905	-0.0534657	-1680
0.354564	-0.0532748	-1680
0.301222	-0.0480199	-1680
0.278635	-0.0452931	-1680
0.20186	-0.0449876	-1680
0.327626	-0.0267099	-1680
0.127884	-0.0357915	-1680
0.306486	-0.0275578	-1680
0.0614043	-0.023059	-1680
0.154907	-0.0193393	-1680
-0.177778	-0.273755	-1680
-0.195351	-0.244198	-1680
-0.10066	-0.223097	-1680
-0.0963541	-0.159355	-1680
-0.179482	-0.158202	-1680
-0.121949	-0.142013	-1680
0.342391	0.000381148	-1560
0.285009	0.000923551	-1560
0.255465	0.000586381	-1560
0.187903	0.0267756	-1560
0.224102	0.0359965	-1560
0.27947	0.0429451	-1560
0.149037	0.0516968	-1560
0.285592	0.0821447	-1560
0.151685	0.0716998	-1560
0.258739	0.0895331	-1560
0.198867	0.0757898	-1560
0.255735	0.117525	-1560
0.126688	0.132874	-1560
0.218795	0.139595	-1560
0.23745	0.171399	-1560
0.223136	-0.321665	-1560
0.330887	-0.258689	-1560
0.31673	-0.234579	-1560
0.339669	-0.232182	-1560
0.260207	-0.228932	-1560
0.294612	-0.217563	-1560
0.262986	-0.205537	-1560
0.228311	-0.20778	-1560
0.421815	-0.19603	-1560
0.266122	-0.174488	-1560
0.348839	-0.168515	-1560
0.166927	-0.140286	-1560
0.305753	-0.132127	-1560
0.325047	-0.127983	-1560
0.31673	-0.100396	-1560
0.233084	-0.0879549	-1560
0.247762	-0.079569	-1560
0.335911	-0.0874999	-1560
0.279866	-0.0862241	-1560
0.305728	-0.0778951	-1560
0.351775	-0.078017	-1560
0.179478	-0.0723451	-1560
0.17165	-0.0661125	-1560
0.215985	-0.0591079	-1560
0.292166	-0.0426692	-1560
0.166181	-0.0429211	-1560
0.368498	-0.0174057	-1560
0.257253	-0.0265311	-1560
0.229396	-0.023622	-1560
0.314998	-0.0191365	-1560
0.294525	-0.0168775	-1560
0.0546157	-0.0147323	-1560
-0.138755	-0.244869	-1560
-0.109171	-0.217283	-1560
-0.162016	-0.213404	-1560
-0.0943507	-0.201662	-1560
-0.0888947	-0.181507	-1560
-0.0753381	-0.152667	-1560
-0.0657142	-0.0182792	-1560
0.243183	0.000507736	-1440
0.203222	0.00928246	-1440
0.158202	0.0121271	-1440
0.1827	0.0158114	-1440
0.122244	0.0221191	-1440
0.15124	0.0281208	-1440
0.0976976	0.0341876	-1440
0.168809	0.0337189	-1440
0.312402	0.0401893	-1440
0.217217	0.0346498	-1440
0.243309	0.0374228	-1440
0.252055	0.043099	-1440
0.225827	0.0433334	-1440
0.115326	0.0515027	-1440
0.200552	0.0557664	-1440
0.24005	0.0772215	-1440
0.183402	0.0717731	-1440
0.209716	0.0737585	-1440
0.252512	0.0907416	-1440
0.233067	0.111461	-1440
0.213018	0.104437	-1440
0.145312	0.104926	-1440
0.184463	0.105258	-1440
0.146307	0.169382	-1440
0.263335	-0.355055	-1440
0.232441	-0.257937	-1440
0.21044	-0.225528	-1440
0.273626	-0.200198	-1440
0.301991	-0.194845	-1440
0.346108	-0.169111	-1440
0.301148	-0.160383	-1440
0.240105	-0.157463	-1440
0.308415	-0.133345	-1440
0.292723	-0.0923945	-1440
0.263025	-0.096213	-1440
0.319837	-0.0906425	-1440
0.1186	-0.0878316	-1440
0.191267	-0.0737834	-1440
0.343149	-0.070966	-1440
0.16591	-0.0683156	-1440
0.131877	-0.0629889	-1440
0.286898	-0.0574826	-1440
0.361789	-0.0583298	-1440
0.263292	-0.0537026	-1440
0.121581	-0.0577522	-1440
0.252424	-0.0447436	-1440
0.160345	-0.0479974	-1440
0.329633	-0.0411498	-1440
0.150561	-0.0429467	-1440
0.312211	-0.0325373	-1440
0.284091	-0.0278653	-1440
0.0860579	-0.0301243	-1440
0.0655578	-0.0285263	-1440
0.183745	-0.0172121	-1440
-0.0239153	-0.482781	-1440
-0.099358	-0.240494	-1440
-0.109732	-0.219607	-1440
-0.0830328	-0.207711	-1440
-0.143648	-0.199381	-1440
-0.128639	-0.193878	-1440
-0.158748	-0.190128	-1440
-0.176914	-0.188172	-1440
-0.0927412	-0.166977	-1440
-0.120404	-0.16809	-1440
-0.0799867	-0.125106	-1440
-0.144173	-0.0139115	-1440
-0.118472	-0.00731565	-1440
0.231879	0.00842373	-1320
0.192904	0.0278207	-1320
0.155753	0.0282048	-1320
0.123314	0.0305378	-1320
0.277878	0.0431664	-1320
0.366721	0.0495016	-1320
0.186395	0.0559207	-1320
0.290034	0.0497601	-1320
0.233502	0.0535109	-1320
0.242413	0.0489568	-1320
0.0630808	0.0480558	-1320
0.297767	0.0906773	-1320
0.191373	0.0854387	-1320
0.184056	0.0967751	-1320
0.261378	0.119483	-1320
0.227502	0.120153	-1320
0.185899	0.139648	-1320
0.149585	0.132545	-1320
0.214312	0.144139	-1320
0.337124	0.1863	-1320
0.222541	-0.278123	-1320
0.275706	-0.242514	-1320
0.233924	-0.225685	-1320
0.292234	-0.202875	-1320
0.265715	-0.133231	-1320
0.301752	-0.115769	-1320
0.265357	-0.112349	-1320
0.33538	-0.0833164	-1320
0.334022	-0.0652293	-1320
0.322842	-0.0682577	-1320
0.215536	-0.0755347	-1320
0.101704	-0.0593987	-1320
0.171755	-0.0536811	-1320
0.2257	-0.0370705	-1320
0.281273	-0.036724	-1320
0.183023	-0.0461555	-1320
0.130418	-0.0353906	-1320
0.0515422	-0.0379519	-1320
0.268707	-0.0149081	-1320
0.323824	-0.0101622	-1320
0.294758	-0.0061169	-1320
0.21266	-0.00264413	-1320
-0.105737	-0.237961	-1320
-0.115123	-0.22452	-1320
-0.170721	-0.19865	-1320
-0.330894	-0.168295	-1320
-0.236521	-0.134984	-1320
0.232938	0.0016402	-1200
0.090608	0.00814	-1200
0.304224	0.0120033	-1200
0.180498	0.00914987	-1200
0.334622	0.0128302	-1200
0.225268	0.0140027	-1200
0.105894	0.0257281	-1200
0.249486	0.0358878	-1200
0.0801971	0.0269006	-1200
0.157051	0.0348237	-1200
0.16818	0.0392225	-1200
0.109285	0.0470439	-1200
0.173467	0.0479928	-1200
0.209211	0.0578882	-1200
0.123594	0.0517341	-1200
0.241003	0.0558481	-1200
0.255048	0.0904482	-1200
0.213743	0.081339	-1200
0.211075	0.112008	-1200
0.239398	0.118657	-1200
0.126996	0.125014	-1200
0.103665	0.122276	-1200
0.215644	0.128851	-1200
0.197363	0.140671	-1200
0.211741	0.146601	-1200
0.121487	0.153833	-1200
0.225353	0.161838	-1200
0.122881	0.171848	-1200
0.197559	0.175549	-1200
0.199455	-0.292781	-1200
0.179684	-0.237838	-1200
0.244505	-0.252807	-1200
0.417117	-0.187367	-1200
0.20133	-0.161157	-1200
0.161107	-0.143835	-1200
0.294769	-0.126407	-1200
0.247749	-0.124096	-1200
0.18457	-0.124543	-1200
0.299069	-0.101161	-1200
0.207373	-0.0833853	-1200
0.286101	-0.0774388	-1200
0.1797	-0.0804581	-1200
0.221692	-0.0780342	-1200
0.251002	-0.0680265	-1200
0.0380359	-0.0453463	-1200
0.165655	-0.0338644	-1200
0.276726	-0.0145295	-1200
0.226393	-0.0112267	-1200
0.26547	-0.012382	-1200
0.0933124	-0.0143452	-1200
0.181565	-0.00811527	-1200
0.203717	-0.00258696	-1200
-0.173101	-0.277886	-1200
-0.188203	-0.268462	-1200
-0.186495	-0.248673	-1200
-0.11824	-0.238287	-1200
-0.104202	-0.197114	-1200
-0.207369	-0.185534	-1200
-0.162959	-0.181243	-1200
-0.219014	-0.185527	-1200
-0.0318468	-0.0647331	-1200
0.346996	0.00251265	-1080
0.0453908	0.00125633	-1080
0.196078	0.0161051	-1080
0.22295	0.0242677	-1080
0.0979289	0.0279586	-1080
0.151631	0.023927	-1080
0.164577	0.0280012	-1080
0.292652	0.0394997	-1080
0.373209	0.0565631	-1080
0.183548	0.0640726	-1080
0.275904	0.0746059	-1080
0.135465	0.0872827	-1080
0.207354	0.0961196	-1080
0.180779	0.0948136	-1080
0.293121	0.102699	-1080
0.243934	0.103033	-1080
0.0597626	0.0938767	-1080
0.261995	0.110266	-1080
0.174137	0.111707	-1080
0.20269	0.127939	-1080
0.162569	0.134661	-1080
0.338399	0.142795	-1080
0.217121	0.150326	-1080
0.162391	0.15313	-1080
0.294411	0.164039	-1080
0.240363	-0.328455	-1080
0.263635	-0.318623	-1080
0.155832	-0.293534	-1080
0.376013	-0.215473	-1080
0.362354	-0.212196	-1080
0.309846	-0.207371	-1080
0.37284	-0.121795	-1080
0.31606	-0.128819	-1080
0.349058	-0.115578	-1080
0.273569	-0.117191	-1080
0.288166	-0.106406	-1080
0.167025	-0.107586	-1080
0.349884	-0.0961926	-1080
0.315133	-0.0903859	-1080
0.34661	-0.0718585	-1080
0.149047	-0.0601424	-1080
0.237559	-0.0538077	-1080
0.11356	-0.0644681	-1080
0.30031	-0.055758	-1080
0.316702	-0.043492	-1080
0.337977	-0.0373406	-1080
0.357779	-0.0421063	-1080
0.257884	-0.0427075	-1080
0.220128	-0.0325017	-1080
0.194218	-0.0351484	-1080
0.293834	-0.0238942	-1080
0.167013	-0.0206462	-1080
0.312739	-0.0088201	-1080
0.200807	-0.00406912	-1080
-0.259933	0.120295	-1080
-0.154701	0.179882	-1080
-0.0805781	-0.137093	-1080
-0.273817	-0.134535	-1080
0.203691	0.000439781	-960
0.112074	0.0014499	-960
0.178067	0.0155847	-960
0.207074	0.0190824	-960
0.33968	0.0343991	-960
0.178475	0.0346396	-960
0.155295	0.0486095	-960
0.213782	0.0517224	-960
0.182138	0.051207	-960
0.130091	0.0489531	-960
0.29686	0.0593223	-960
0.284057	0.0589032	-960
0.330697	0.0637751	-960
0.266033	0.0810915	-960
0.168629	0.0848159	-960
0.381012	0.0973428	-960
0.219918	0.106537	-960
0.238799	0.115195	-960
0.296551	0.116336	-960
0.0437118	0.108392	-960
0.254799	0.115752	-960
0.287026	0.119414	-960
0.196242	0.12364	-960
0.228446	0.140757	-960
0.257173	0.183189	-960
0.220052	0.205982	-960
0.349572	-0.260797	-960
0.244411	-0.232723	-960
0.100781	-0.123039	-960
0.197281	-0.0868901	-960
0.263099	-0.0950561	-960
0.16457	-0.0935848	-960
0.352092	-0.0768375	-960
0.137674	-0.0842362	-960
0.222018	-0.0793507	-960
0.330831	-0.0692277	-960
0.233567	-0.049038	-960
0.175751	-0.0473485	-960
0.190736	-0.0451874	-960
0.133387	-0.0233645	-960
0.277378	-0.0189507	-960
0.294877	-0.0202741	-960
0.0428661	-0.0271166	-960
0.221604	-0.0136076	-960
0.348505	-0.0086165	-960
0.284296	-0.00432233	-960
0.0612981	-0.00668061	-960
0.087727	-0.00323823	-960
-0.236664	0.143882	-960
-0.155338	-0.275206	-960
-0.130369	-0.277217	-960
-0.118315	-0.226926	-960
-0.104598	-0.230745	-960
-0.175821	-0.138989	-960
-0.125369	-0.0283252	-960
0.338187	0.0112151	-840
0.19266	0.0155117	-840
0.360124	0.0210836	-840
0.130471	0.0427087	-840
0.290956	0.0313511	-840
0.232436	0.0346002	-840
0.101666	0.0345432	-840
0.211776	0.0592821	-840
0.10083	0.0877474	-840
0.253195	0.0945235	-840
0.172683	0.100665	-840
0.296451	0.108596	-840
0.242052	0.107149	-840
0.264587	0.12331	-840
0.202203	0.120331	-840
0.281688	0.170835	-840
0.155582	0.167878	-840
0.252352	0.180062	-840
0.230641	0.218852	-840
0.143121	0.305894	-840
0.215122	-0.368235	-840
0.268385	-0.252042	-840
0.299925	-0.217753	-840
0.221404	-0.218084	-840
0.363237	-0.14809	-840
0.201305	-0.14408	-840
0.279826	-0.129809	-840
0.332381	-0.0973925	-840
0.203503	-0.0611919	-840
0.116765	-0.0640507	-840
0.355447	-0.0535937	-840
0.0586968	-0.0490423	-840
0.3614	-0.0382393	-840
0.0673724	-0.0426403	-840
0.211019	-0.0212374	-840
0.136741	-0.0146924	-840
0.359727	-0.00215157	-840
-0.132394	-0.29084	-840
-0.159127	-0.235236	-840
-0.109133	-0.200587	-840
-0.066185	-0.129449	-840
0.222721	0.00146749	-720
0.289893	0.00930002	-720
0.173441	0.00944147	-720
0.150036	0.00885211	-720
0.159064	0.0142624	-720
0.196068	0.0176924	-720
0.261144	0.0156061	-720
0.119479	0.0137025	-720
0.256993	0.0337759	-720
0.229416	0.0332337	-720
0.30178	0.0440779	-720
0.314423	0.0395693	-720
0.149516	0.0371706	-720
0.273498	0.0387737	-720
0.178953	0.0446024	-720
0.225049	0.0502484	-720
0.0857116	0.0503604	-720
0.216683	0.0504959	-720
0.253893	0.068153	-720
0.114939	0.0747538	-720
0.230903	0.0743766	-720
0.0903358	0.0723551	-720
0.241439	0.0900947	-720
0.264781	0.0826924	-720
0.255579	0.0832405	-720
0.141649	0.0911968	-720
0.22054	0.0953459	-720
0.216725	0.101905	-720
0.354896	0.111883	-720
0.287471	0.122945	-720
0.221139	0.138669	-720
0.102496	0.133454	-720
0.151118	0.149932	-720
0.270519	0.172168	-720
0.0484338	0.165933	-720
0.348306	-0.330568	-720
0.217713	-0.239177	-720
0.206631	-0.220226	-720
0.222999	-0.199067	-720
0.287198	-0.152578	-720
0.333519	-0.138801	-720
0.274013	-0.134954	-720
0.353367	-0.0981692	-720
0.177697	-0.105429	-720
0.3092	-0.0984647	-720
0.148302	-0.102016	-720
0.315721	-0.084832	-720
0.194071	-0.0754519	-720
0.331512	-0.0728737	-720
0.143478	-0.0772306	-720
0.14693	-0.0631518	-720
0.260345	-0.0478042	-720
0.0361375	-0.0536037	-720
0.19064	-0.0411645	-720
0.268081	-0.0424681	-720
0.106043	-0.0305968	-720
0.0930789	-0.0294844	-720
0.121649	-0.0216512	-720
0.188974	-0.0212572	-720
0.155806	-0.0205504	-720
0.248244	-0.0137428	-720
0.336977	-5.21437e-05	-720
0.105706	-0.000776362	-720
0.0729476	-0.0011066	-720
-0.157816	-0.300827	-720
-0.123341	-0.289168	-720
-0.0982998	-0.24276	-720
-0.072637	-0.199612	-720
-0.112346	-0.188376	-720
-0.125169	-0.185243	-720
-0.143973	-0.182632	-720
-0.0769725	-0.177755	-720
-0.155204	-0.18066	-720
-0.0465721	-0.155398	-720
-0.333871	-0.160475	-720
-0.115511	-0.149405	-720
-0.0803468	-0.120366	-720
-0.236888	-0.0350212	-720
0.353637	0.0246947	-600
0.0994405	0.0173005	-600
0.151002	0.0160551	-600
0.2061	0.0287014	-600
0.314562	0.036003	-600
0.235737	0.0282744	-600
0.145352	0.0279043	-600
0.158548	0.0379743	-600
0.0919939	0.0376256	-600
0.262108	0.0525563	-600
0.340296	0.0535384	-600
0.226971	0.0523641	-600
0.0900975	0.0521079	-600
0.230353	0.070476	-600
0.24533	0.0706325	-600
0.408968	0.0926229	-600
0.251335	0.116798	-600
0.295616	0.114201	-600
0.218177	0.119353	-600
0.288158	0.120264	-600
0.100411	0.111816	-600
0.192477	0.160039	-600
0.255477	0.184392	-600
0.204598	0.19143	-600
0.283123	0.378861	-600
0.173059	-0.324489	-600
0.290271	-0.201421	-600
0.332505	-0.141707	-600
0.285408	-0.141727	-600
0.295372	-0.126999	-600
0.325297	-0.119645	-600
0.217861	-0.123043	-600
0.280689	-0.10475	-600
0.180278	-0.10809	-600
0.33418	-0.0893355	-600
0.141448	-0.0975054	-600
0.0287997	-0.09071	-600
0.203827	-0.0733811	-600
0.289733	-0.0684098	-600
0.18248	-0.0696559	-600
0.160045	-0.0657443	-600
0.239979	-0.0445746	-600
0.317568	-0.0394556	-600
0.179652	-0.0457243	-600
0.190536	-0.0453646	-600
0.26991	-0.0384151	-600
0.169017	-0.038049	-600
0.0688609	-0.0446966	-600
0.0483174	-0.0438617	-600
0.229755	-0.0183886	-600
0.11216	-0.0131797	-600
0.126061	-0.0141817	-600
0.242713	-0.00190117	-600
-0.161882	-0.303701	-600
-0.19486	-0.291341	-600
-0.122129	-0.274672	-600
-0.107841	-0.263403	-600
-0.272832	-0.247653	-600
-0.108812	-0.235811	-600
-0.147243	-0.234683	-600
-0.13535	-0.219555	-600
-0.143671	-0.209119	-600
-0.20413	-0.188135	-600
-0.308143	-0.182063	-600
0.20526	0.0122032	-480
0.152451	0.00439135	-480
0.0810716	0.00798544	-480
0.351268	0.021526	-480
0.255851	0.0227347	-480
0.102781	0.0285341	-480
0.177209	0.0433606	-480
0.114628	0.0378698	-480
0.215614	0.0454502	-480
0.200215	0.0534035	-480
0.239181	0.0540464	-480
0.328638	0.0614275	-480
0.208002	0.0594472	-480
0.0687587	0.0576791	-480
0.284997	0.0765368	-480
0.242633	0.0834485	-480
0.226487	0.0919676	-480
0.210193	0.093395	-480
0.276014	0.105881	-480
0.328744	0.105	-480
0.241267	0.113185	-480
0.0952797	0.127439	-480
0.223989	0.140697	-480
0.125686	0.14494	-480
0.23538	0.168029	-480
0.211935	0.182431	-480
0.366942	-0.334543	-480
0.171127	-0.340432	-480
0.163615	-0.269613	-480
0.243125	-0.192419	-480
0.242379	-0.156192	-480
0.34878	-0.134731	-480
0.215762	-0.124817	-480
0.136681	-0.122822	-480
0.098747	-0.095485	-480
0.238207	-0.083897	-480
0.191671	-0.0725686	-480
0.232961	-0.073983	-480
0.249694	-0.0652236	-480
0.0798912	-0.0642261	-480
0.0594631	-0.0340398	-480
0.137412	-0.0320994	-480
0.186584	-0.0286968	-480
0.083872	-0.0259432	-480
0.158766	-0.0198828	-480
0.186171	-0.0096954	-480
0.122468	-0.00377157	-480
-0.205165	-0.263419	-480
-0.0975241	-0.227815	-480
-0.0664428	-0.189351	-480
-0.165987	-0.194373	-480
-0.104885	-0.13258	-480
-0.0490659	-0.125372	-480
-0.0659844	-0.112913	-480
0.193411	0.00176979	-360
0.109231	0.00568232	-360
0.132212	0.0134531	-360
0.180504	0.0188439	-360
0.36138	0.03703	-360
0.225867	0.02713	-360
0.156823	0.0273131	-360
0.248204	0.0355043	-360
0.262443	0.0435938	-360
0.130067	0.0334497	-360
0.284814	0.0456213	-360
0.0965049	0.0387184	-360
0.237148	0.0646821	-360
0.251731	0.0609391	-360
0.0523553	0.0485913	-360
0.151857	0.0625733	-360
0.298432	0.0727717	-360
0.181283	0.0751314	-360
0.355262	0.0904085	-360
0.142731	0.0723512	-360
0.30929	0.0884692	-360
0.295452	0.0936701	-360
0.302585	0.107625	-360
0.284921	0.104194	-360
0.351368	0.111992	-360
0.221888	0.105042	-360
0.258413	0.117518	-360
0.304803	0.12872	-360
0.175103	0.121031	-360
0.229778	0.142058	-360
0.0928479	0.132239	-360
0.288042	0.16196	-360
0.349624	0.171121	-360
0.255546	0.171541	-360
0.114372	0.170293	-360
0.183563	0.188785	-360
0.122725	0.187266	-360
0.115208	0.197362	-360
0.249953	0.212253	-360
0.273826	0.229802	-360
0.220703	0.228283	-360
0.27772	-0.273304	-360
0.255033	-0.269571	-360
0.276642	-0.214761	-360
0.372712	-0.204695	-360
0.367898	-0.186775	-360
0.169561	-0.181148	-360
0.148527	-0.160318	-360
0.242256	-0.139192	-360
0.288702	-0.110709	-360
0.316164	-0.103439	-360
0.213423	-0.0960609	-360
0.0881694	-0.104981	-360
0.18477	-0.0805479	-360
0.382724	-0.0626139	-360
0.164284	-0.062931	-360
0.227735	-0.05837	-360
0.240771	-0.0405513	-360
0.159594	-0.0383537	-360
0.18183	-0.0269406	-360
0.225991	-0.0205855	-360
0.060832	-0.0319915	-360
0.29219	-0.00631904	-360
0.156208	-0.0203045	-360
0.0674011	-0.0251897	-360
0.223767	-0.0120761	-360
0.181853	-0.00143385	-360
-0.143548	-0.258772	-360
-0.125381	-0.234081	-360
-0.167433	-0.221409	-360
-0.0954653	-0.215436	-360
-0.114074	-0.211908	-360
-0.103849	-0.151437	-360
-0.104431	-0.135211	-360
-0.165527	-0.133418	-360
-0.00958359	-0.108661	-360
-0.272747	-0.118768	-360
-0.068956	-0.0925801	-360
-0.159485	-0.0883672	-360
-0.103319	-0.0532128	-360
-0.193631	-0.0449715	-360
0.387102	0.00342091	-240
0.245834	0.00671564	-240
0.130275	0.0087766	-240
0.373627	0.0169714	-240
0.059217	0.0164807	-240
0.188524	0.029281	-240
0.073267	0.0340829	-240
0.133588	0.0315383	-240
0.0916719	0.0386745	-240
0.344178	0.0478087	-240
0.316927	0.047388	-240
0.121087	0.0446962	-240
0.168668	0.0523512	-240
0.343706	0.0706334	-240
0.192538	0.0715447	-240
0.218332	0.0814079	-240
0.151367	0.0961991	-240
0.301226	0.100433	-240
0.276211	0.107443	-240
0.244326	0.109105	-240
0.232627	0.120293	-240
0.298875	0.129812	-240
0.127907	0.128109	-240
0.318281	0.137692	-240
0.415601	0.142641	-240
0.0900779	0.139753	-240
0.166954	0.143047	-240
0.0993459	0.179325	-240
0.11179	0.221062	-240
0.21515	-0.300268	-240
0.228915	-0.277953	-240
0.177019	-0.282114	-240
0.253895	-0.276524	-240
0.176137	-0.263151	-240
0.25948	-0.255105	-240
0.352678	-0.219331	-240
0.325585	-0.212845	-240
0.369819	-0.207222	-240
0.26067	-0.200255	-240
0.276063	-0.16917	-240
0.307619	-0.14137	-240
0.174144	-0.135753	-240
0.158796	-0.129491	-240
0.163755	-0.101231	-240
0.338924	-0.0954428	-240
0.00413301	-0.100513	-240
0.263972	-0.0909588	-240
0.252962	-0.0762818	-240
0.310573	-0.0772103	-240
0.156468	-0.0624016	-240
0.337461	-0.040857	-240
0.161165	-0.0343713	-240
0.186651	-0.0303086	-240
0.132996	-0.0304074	-240
0.11035	-0.0283398	-240
0.0282422	-0.0176597	-240
-0.23047	-0.301132	-240
-0.131599	-0.238825	-240
-0.0882949	-0.230065	-240
-0.0781135	-0.204248	-240
-0.105511	-0.176336	-240
-0.0972261	-0.113145	-240
-0.00852441	-0.0950842	-240
0.215767	0.00401313	-120
0.211475	0.0125939	-120
0.0944386	0.0205327	-120
0.139916	0.0160525	-120
0.320683	0.0350821	-120
0.337585	0.0347391	-120
0.0804471	0.021846	-120
0.153334	0.02556	-120
0.129331	0.0258008	-120
0.352108	0.0444363	-120
0.286197	0.0475666	-120
0.0973194	0.0401167	-120
0.0557392	0.0480628	-120
0.226644	0.0570157	-120
0.0999133	0.0579934	-120
0.0321489	0.0692521	-120
0.205564	0.0839985	-120
0.307785	0.0954031	-120
0.0426023	0.0894783	-120
0.246457	0.114155	-120
0.333664	0.106691	-120
0.354224	0.115659	-120
0.269557	0.117869	-120
0.313445	0.115622	-120
0.147518	0.12251	-120
0.260293	0.123152	-120
0.250994	0.129026	-120
0.282455	0.139475	-120
0.12455	0.132806	-120
0.0986522	0.136571	-120
0.150345	0.149668	-120
0.210746	0.166713	-120
0.121095	0.176235	-120
0.260801	-0.367551	-120
0.331345	-0.323363	-120
0.154822	-0.326875	-120
0.160249	-0.3091	-120
0.320085	-0.297798	-120
0.297445	-0.273357	-120
0.287111	-0.265537	-120
0.388453	-0.252643	-120
0.376762	-0.211565	-120
0.358778	-0.203917	-120
0.404202	-0.199862	-120
0.378424	-0.178947	-120
0.192547	-0.156537	-120
0.411691	-0.129335	-120
0.256994	-0.126366	-120
0.348427	-0.11432	-120
0.271924	-0.11223	-120
0.25091	-0.0942985	-120
0.22616	-0.0885695	-120
0.365454	-0.066814	-120
0.221648	-0.0436225	-120
0.0514778	-0.0451404	-120
0.195589	-0.034523	-120
0.340083	-0.0286601	-120
0.0364582	-0.0240545	-120
0.055279	-0.0230054	-120
0.135869	-0.00904742	-120
0.0915519	-0.00145086	-120
-0.284624	0.0590221	-120
-0.172053	-0.315943	-120
-0.177728	-0.27189	-120
-0.143951	-0.270477	-120
-0.105523	-0.194302	-120
-0.0651564	-0.138877	-120
-0.0435792	-0.132955	-120
-0.00346329	-0.113444	-120
-0.28367	-0.0915772	-120
-0.291848	-0.0152423	-120
0.189224	0.0027772	0
0.132321	0.01101	0
0.255821	0.0124041	0
0.288191	0.018425	0
0.233113	0.0218114	0
0.211974	0.0208125	0
0.0874482	0.0293527	0
0.185359	0.0298631	0
0.138176	0.0345064	0
0.180633	0.039995	0
0.375164	0.0430411	0
0.172252	0.0434527	0
0.156511	0.0415976	0
0.0611351	0.0438095	0
0.0903759	0.0444132	0
0.275259	0.0507744	0
0.307894	0.0519325	0
0.263561	0.0545066	0
0.316613	0.0540072	0
0.0389894	0.0566856	0
0.321115	0.0739635	0
0.249092	0.0731347	0
0.0376856	0.0735464	0
0.24115	0.0775695	0
0.0470773	0.0765376	0
0.251754	0.0885904	0
0.0772422	0.0846716	0
0.161671	0.0891777	0
0.359399	0.105868	0
0.307903	0.122334	0
0.12587	0.122877	0
0.0870731	0.127768	0
0.131698	0.143443	0
0.0382849	0.140408	0
0.089031	0.151374	0
0.109594	0.349839	0
0.0607233	-0.507423	0
0.244796	-0.453825	0
0.175207	-0.35753	0
0.251434	-0.279125	0
0.210043	-0.251308	0
0.276992	-0.24293	0
0.141438	-0.232612	0
0.300085	-0.22454	0
0.285844	-0.207369	0
0.248653	-0.200091	0
0.288822	-0.198271	0
0.294687	-0.195136	0
0.320657	-0.186151	0
0.207115	-0.179207	0
0.287025	-0.180652	0
0.162563	-0.144044	0
0.29611	-0.13706	0
0.105436	-0.139072	0
0.00768534	-0.129101	0
0.171081	-0.119175	0
0.10781	-0.0972705	0
0.165628	-0.0845894	0
0.153579	-0.0768912	0
0.0264275	-0.0757518	0
0.162595	-0.0772881	0
0.0858928	-0.072617	0
0.350026	-0.0630991	0
0.153949	-0.0599019	0
0.129439	-0.0571809	0
0.206356	-0.0523455	0
0.0364733	-0.049273	0
0.195313	-0.0498625	0
0.1555	-0.0445452	0
0.199297	-0.0409115	0
0.11555	-0.0400782	0
0.0608377	-0.0429466	0
0.101236	-0.0356566	0
0.0745752	-0.03149	0
0.0404395	-0.0263428	0
0.160802	-0.0159859	0
0.0943376	-0.0214903	0
0.217779	-0.014257	0
0.211955	-0.0109351	0
0.188181	-0.00886029	0
0.241855	-0.00480145	0
-0.0555434	0.0400704	0
-0.305829	0.067978	0
-0.198955	-0.3716	0
-0.0916235	-0.369554	0
-0.0839882	-0.36036	0
-0.0562041	-0.314805	0
-0.0855381	-0.308633	0
-0.101147	-0.306651	0
-0.087247	-0.291934	0
-0.10984	-0.252452	0
-0.129273	-0.248711	0
-0.0592294	-0.23732	0
-0.0903319	-0.227453	0
-0.264602	-0.170361	0
-0.0798204	-0.159542	0
0.127743	0.000236566	120
0.235413	0.0106316	120
0.130942	0.0137139	120
0.0432475	0.0052462	120
0.254718	0.029696	120
0.165018	0.0262519	120
0.240996	0.0442935	120
0.225804	0.0503399	120
0.12316	0.0461861	120
0.171217	0.0481969	120
0.141038	0.0454625	120
0.175309	0.0557183	120
0.208179	0.0643182	120
0.339857	0.0710046	120
0.3222	0.0715056	120
0.352557	0.074247	120
0.275769	0.0817823	120
0.367588	0.079688	120
0.2498	0.0819493	120
0.321292	0.0945012	120
0.253697	0.0894985	120
0.204596	0.0921982	120
0.359205	0.115472	120
0.126305	0.108361	120
0.222745	0.159599	120
0.0482359	0.152036	120
0.141454	0.188968	120
0.081993	0.305365	120
0.132791	0.380099	120
0.241153	-0.48077	120
0.23117	-0.475343	120
0.205958	-0.450079	120
0.293404	-0.31276	120
0.234754	-0.269386	120
0.337549	-0.2497	120
0.196878	-0.236359	120
0.349536	-0.227199	120
0.331847	-0.211752	120
0.350979	-0.193065	120
0.246109	-0.199033	120
0.243179	-0.171555	120
0.332452	-0.15244	120
0.171666	-0.158648	120
0.245666	-0.120838	120
0.139325	-0.107475	120
0.176481	-0.101224	120
0.27972	-0.0904513	120
0.223155	-0.0931717	120
0.163759	-0.0583643	120
0.329042	-0.0428888	120
0.200099	-0.0359939	120
0.232095	-0.0358709	120
0.0573859	-0.0448639	120
0.147048	-0.0364931	120
0.226717	-0.0308571	120
0.184723	-0.0246495	120
0.374781	-0.00425415	120
0.120079	-0.0256696	120
0.305094	-0.0118581	120
0.20959	-0.00994805	120
0.095699	-0.0175665	120
0.15128	-0.0067068	120
0.19396	-0.00127335	120
-0.257044	-0.347215	120
-0.137407	-0.293194	120
-0.121414	-0.274625	120
-0.158751	-0.268458	120
-0.0932225	-0.240645	120
-0.0955261	-0.202711	120
-0.137122	-0.193461	120
-0.0533762	-0.17554	120
-0.14234	-0.170845	120
0.161318	0.0169425	240
0.115518	0.0168949	240
0.253046	0.0219132	240
0.0952499	0.0212205	240
0.103699	0.0276784	240
0.244169	0.0317188	240
0.26122	0.0357252	240
0.11867	0.0318138	240
0.214623	0.039915	240
0.352621	0.045653	240
0.135875	0.0429436	240
0.173475	0.0445937	240
0.343379	0.0512009	240
0.213984	0.0595126	240
0.130473	0.0575365	240
0.234352	0.0667649	240
0.323719	0.0799454	240
0.278969	0.0804547	240
0.0738679	0.0763396	240
0.354226	0.101118	240
0.115956	0.108126	240
0.180773	0.118149	240
0.0766773	0.111786	240
0.0751987	0.139648	240
0.120001	0.140409	240
0.0573865	0.144578	240
0.294695	0.151796	240
0.310865	0.160828	240
0.239574	0.185641	240
0.0897315	0.208416	240
0.251562	0.210419	240
0.154263	-0.330351	240
0.196409	-0.259903	240
0.343928	-0.25026	240
0.320503	-0.230595	240
0.309804	-0.225133	240
0.28961	-0.194082	240
0.411206	-0.156394	240
0.26921	-0.150011	240
0.226351	-0.141183	240
0.15129	-0.144735	240
0.36079	-0.130719	240
0.306213	-0.122439	240
0.30136	-0.110693	240
0.221039	-0.0788282	240
0.213635	-0.0672828	240
0.167549	-0.0742408	240
0.328144	-0.067837	240
0.0366752	-0.069493	240
0.339588	-0.0484388	240
0.116199	-0.0426561	240
0.134222	-0.0368533	240
0.20065	-0.0316582	240
0.33258	-0.0205735	240
0.143031	-0.0280256	240
0.156719	-0.0238922	240
0.111103	-0.0131414	240
0.186143	-0.00598974	240
-0.181707	0.0902628	240
-0.0622765	-0.225115	240
-0.130874	-0.205314	240
-0.146358	-0.179041	240
-0.0702023	-0.158541	240
-0.100887	-0.160899	240
0.143559	0.000270291	360
0.323071	0.0303722	360
0.294892	0.0342345	360
0.309742	0.0369446	360
0.177573	0.0370015	360
0.281923	0.068277	360
0.168554	0.0454587	360
0.0471948	0.0303651	360
0.0999081	0.0409207	360
0.143771	0.0518533	360
0.334013	0.0789251	360
0.189614	0.0642298	360
0.362841	0.0866071	360
0.219683	0.0778724	360
0.202668	0.0721251	360
0.162755	0.0790958	360
0.183092	0.0946233	360
0.201284	0.097625	360
0.216863	0.110009	360
0.162153	0.109582	360
0.256353	0.13134	360
0.287108	0.1544	360
0.294449	0.157978	360
0.135702	0.160795	360
0.229146	0.219633	360
0.266281	-0.452278	360
0.256886	-0.417098	360
0.250908	-0.395097	360
0.253543	-0.370918	360
0.37853	-0.276176	360
0.165802	-0.293052	360
0.221161	-0.282059	360
0.180161	-0.241873	360
0.23571	-0.229446	360
0.352274	-0.191418	360
0.235758	-0.203741	360
0.238725	-0.189365	360
0.198343	-0.182813	360
0.256659	-0.156607	360
0.224314	-0.166445	360
0.366321	-0.137141	360
0.169837	-0.149722	360
0.259226	-0.134788	360
0.357597	-0.112405	360
0.215321	-0.0927224	360
0.337171	-0.0563311	360
0.26984	-0.0654028	360
0.242776	-0.0644002	360
0.309415	-0.0424067	360
0.156915	-0.0527107	360
0.143523	-0.0416617	360
0.343001	-0.0181922	360
0.185505	-0.03369	360
0.21202	-0.0219866	360
0.192075	-0.020984	360
0.238979	-0.00657927	360
-0.156433	-0.262806	360
-0.106994	-0.257288	360
-0.0996635	-0.228175	360
-0.124549	-0.226844	360
-0.123695	-0.209596	360
-0.104584	-0.181416	360
-0.119712	-0.15157	360
-0.0960347	-0.136676	360
0.183878	0.00177049	480
0.105061	0.0216847	480
0.271219	0.0336695	480
0.332623	0.0320655	480
0.217447	0.0303177	480
0.177327	0.0307868	480
0.321702	0.0372786	480
0.200689	0.0438082	480
0.025623	0.0343656	480
0.285261	0.0446405	480
0.0806824	0.0417124	480
0.335652	0.0481436	480
0.358073	0.05487	480
0.215575	0.0562319	480
0.143493	0.0547565	480
0.292341	0.0619444	480
0.0483737	0.0605824	480
0.187718	0.0701839	480
0.240316	0.0769708	480
0.274545	0.0842873	480
0.205033	0.118986	480
0.234155	0.118267	480
0.223645	0.140981	480
0.228292	0.16119	480
0.2247	0.20835	480
0.198872	0.22837	480
0.123982	0.271051	480
0.189108	-0.333957	480
0.210339	-0.329883	480
0.197633	-0.298679	480
0.292006	-0.270424	480
0.227735	-0.222474	480
0.242058	-0.177107	480
0.20004	-0.167907	480
0.329442	-0.153914	480
0.233928	-0.157588	480
0.269536	-0.152168	480
0.233863	-0.126084	480
0.181546	-0.109671	480
0.349905	-0.0807297	480
0.156956	-0.067848	480
0.125767	-0.065409	480
0.135223	-0.0608383	480
0.290426	-0.0536847	480
0.28519	-0.0443144	480
0.186009	-0.0347087	480
0.222012	-0.0352841	480
0.057434	-0.0308049	480
0.168997	-0.0279736	480
0.225165	-0.0247303	480
0.102752	-0.0165239	480
0.234967	-0.0119728	480
0.126406	-0.0019486	480
0.142752	-0.00340025	480
-0.170914	-0.274566	480
-0.187612	-0.232691	480
-0.116398	-0.2274	480
-0.140548	-0.210478	480
-0.0164077	-0.110814	480
-0.172879	-6.76604e-05	480
0.244611	0.00280208	600
0.166639	0.0254839	600
0.286842	0.0313031	600
0.328672	0.0418163	600
0.255485	0.0410925	600
0.142927	0.0468901	600
0.356285	0.0526806	600
0.248077	0.0562638	600
0.374008	0.0768316	600
0.209282	0.0706541	600
0.254077	0.084944	600
0.0789322	0.0805725	600
0.183338	0.0872444	600
0.236768	0.0899892	600
0.35414	0.114728	600
0.352988	0.134335	600
0.133345	0.134271	600
0.254246	0.143085	600
0.173476	0.146289	600
0.110011	0.147292	600
0.260293	0.150553	600
0.344697	0.160091	600
0.222266	0.195028	600
0.229028	-0.284288	600
0.311118	-0.276569	600
0.221411	-0.278104	600
0.228773	-0.25367	600
0.342243	-0.243967	600
0.366094	-0.243466	600
0.233215	-0.222952	600
0.202183	-0.218842	600
0.382038	-0.184676	600
0.227453	-0.181029	600
0.413994	-0.166472	600
0.282912	-0.161609	600
0.211253	-0.15971	600
0.363681	-0.155007	600
0.266393	-0.126516	600
0.417704	-0.107286	600
0.20991	-0.105615	600
0.236372	-0.097508	600
0.134019	-0.0899711	600
0.186524	-0.0889986	600
0.198409	-0.0724206	600
0.121117	-0.0823355	600
0.207695	-0.0689485	600
0.38794	-0.0532366	600
0.158114	-0.0479562	600
0.186989	-0.041088	600
0.242006	-0.0420833	600
0.338132	-0.030702	600
0.228633	-0.0255964	600
0.259915	-0.0202933	600
0.27769	-0.0180368	600
0.218917	-0.0164641	600
0.205718	-0.00822823	600
0.14388	-0.0041787	600
0.234953	-0.000395077	600
-0.330248	0.19094	600
-0.201146	-0.32256	600
-0.154172	-0.304498	600
-0.130084	-0.269902	600
-0.135759	-0.25823	600
-0.189201	-0.253396	600
-0.195291	-0.219373	600
-0.157343	-0.197329	600
-0.227794	-0.146808	600
-0.230977	-0.130568	600
-0.124846	-0.0842722	600
0.207935	0.0190591	720
0.317767	0.0199329	720
0.179274	0.0276328	720
0.270617	0.0437891	720
0.194567	0.0509377	720
0.177237	0.0471669	720
0.1295	0.045261	720
0.259128	0.0588428	720
0.32224	0.0667304	720
0.251903	0.0752513	720
0.281253	0.0785177	720
0.22024	0.0841064	720
0.201823	0.0962574	720
0.0964181	0.095929	720
0.0386888	0.270405	720
0.160336	-0.407246	720
0.205969	-0.337308	720
0.156333	-0.273812	720
0.192504	-0.232001	720
0.178973	-0.229438	720
0.282923	-0.207875	720
0.171789	-0.204904	720
0.220098	-0.184757	720
0.229151	-0.183574	720
0.197881	-0.17115	720
0.266527	-0.14396	720
0.214001	-0.141461	720
0.170686	-0.124185	720
0.223605	-0.1226	720
0.154632	-0.119018	720
0.334438	-0.110723	720
0.232291	-0.101718	720
0.254068	-0.0980603	720
0.368301	-0.0978798	720
0.291251	-0.093983	720
0.381664	-0.0928646	720
0.15837	-0.0912978	720
0.339059	-0.0851992	720
0.209313	-0.0807549	720
0.258444	-0.075932	720
0.219429	-0.0718255	720
0.245643	-0.0607467	720
0.162746	-0.0690121	720
0.378468	-0.0669094	720
0.175767	-0.0655755	720
0.322628	-0.0628961	720
0.371717	-0.0645387	720
0.212244	-0.0600419	720
0.27123	-0.0609797	720
0.284056	-0.0518756	720
0.195481	-0.0536347	720
0.168674	-0.0383854	720
0.147208	-0.0380708	720
0.244836	-0.0337139	720
0.206944	-0.032479	720
0.0787153	-0.0208527	720
0.116383	-0.0182898	720
0.324644	-0.0109797	720
0.247293	-0.0115564	720
0.0579693	-0.0105603	720
0.0952233	-0.0089061	720
0.194378	-0.00750815	720
0.173709	-0.00139212	720
0.228778	-0.00353565	720
0.219332	-0.00118243	720
-0.205287	-0.286314	720
-0.147662	-0.263674	720
-0.178942	-0.233826	720
-0.125229	-0.214883	720
-0.0879094	-0.210499	720
-0.130053	-0.195186	720
-0.0839179	-0.171646	720
-0.0951764	-0.144963	720
-0.0163665	-0.136524	720
-0.0587362	-0.138476	720
-0.0841285	-0.115518	720
-0.0804739	-0.0862956	720
0.155779	0.00280927	840
0.176818	0.0099553	840
0.109026	0.0131896	840
0.136381	0.0371581	840
0.228353	0.0522272	840
0.354595	0.0623751	840
0.296798	0.0489464	840
0.275425	0.0489729	840
0.199145	0.0459445	840
0.107798	0.0424312	840
0.148725	0.0455261	840
0.0933894	0.0502613	840
0.329131	0.0908131	840
0.283996	0.0917827	840
0.210674	0.0905806	840
0.239514	0.0971622	840
0.256546	0.112995	840
0.290609	0.126078	840
0.228443	0.124225	840
0.103769	0.119889	840
0.186293	0.173198	840
0.209084	0.182901	840
0.251507	0.19283	840
0.275341	-0.342476	840
0.22693	-0.333395	840
0.21179	-0.300914	840
0.202019	-0.286323	840
0.271993	-0.261288	840
0.254386	-0.254885	840
0.395578	-0.211582	840
0.406097	-0.187096	840
0.265184	-0.182292	840
0.244364	-0.175839	840
0.292451	-0.156136	840
0.230279	-0.135184	840
0.336598	-0.123734	840
0.308294	-0.121785	840
0.262249	-0.124169	840
0.294968	-0.121178	840
0.278137	-0.097842	840
[truncated: 543 more rows]
