# Supplementary material for: Spinal premotor interneurons controlling antagonistic muscles are spatially intermingled
Source: eLife. 2022 Dec 13;11:e81976. doi: 10.7554/eLife.81976 (PMC9844990; doi:10.7554/eLife.81976)
Supplement: Figure 12—figure supplement 15—source data 3. [file elife-81976-fig12-figsupp15-data3.xlsx]

## Sheet: Sheet1
0.0562067	-0.133139	-5760
0.183208	-0.113153	-5760
0.214187	-0.452833	-5760
-0.0457835	0.213284	-5760
-0.154428	-0.0545933	-5760
-0.150269	-0.181593	-5760
0.256258	0.0941058	-5640
0.236522	0.0835262	-5640
0.233181	0.0302301	-5640
0.265024	-0.097163	-5640
0.280204	-0.139354	-5640
0.311113	-0.138352	-5640
0.235073	-0.146179	-5640
0.305108	-0.186546	-5640
0.208873	-0.449239	-5640
-0.200984	0.367861	-5640
0.256191	0.16088	-5520
0.268025	0.0514343	-5520
0.187917	-0.0383297	-5520
0.261515	-0.0252886	-5520
0.26154	-0.0736111	-5520
0.336209	-0.0828373	-5520
0.312034	-0.156349	-5520
0.403265	-0.133685	-5520
0.503116	-0.129735	-5520
0.297574	-0.172565	-5520
0.378002	-0.162716	-5520
0.275239	-0.192316	-5520
0.285854	-0.189159	-5520
0.360189	-0.215251	-5520
0.158532	-0.265602	-5520
0.287678	-0.256124	-5520
0.322535	-0.32831	-5520
0.200087	-0.462689	-5520
-0.419531	0.465038	-5520
-0.0866753	-0.100934	-5520
-0.440463	-0.191702	-5520
0.286528	-0.1688	-5400
0.28773	-0.225104	-5400
0.248718	-0.323952	-5400
-0.160147	-0.262956	-5400
0.260883	0.0454129	-5280
0.325284	0.021716	-5280
0.280379	-0.000981268	-5280
0.188604	-0.0498325	-5280
0.226238	-0.128475	-5280
0.202216	-0.463689	-5280
-0.456832	-0.196849	-5280
-0.152743	-0.154901	-5280
-0.225869	-0.210092	-5280
-0.189437	-0.216407	-5280
-0.167659	-0.227581	-5280
-0.103898	-0.244262	-5280
-0.178303	-0.313963	-5280
0.250839	0.10116	-5160
0.251978	-0.00803125	-5160
0.22026	-0.104625	-5160
0.29295	-0.124812	-5160
0.392446	-0.134775	-5160
0.31332	-0.226891	-5160
0.287533	-0.29756	-5160
0.184513	-0.469131	-5160
-0.203222	-0.199263	-5160
-0.110646	-0.210251	-5160
0.0294177	0.11242	-5040
0.243677	0.0925549	-5040
0.246892	0.0611558	-5040
0.130695	0.029883	-5040
0.242297	0.0305593	-5040
0.182863	0.0191367	-5040
0.256687	0.00976531	-5040
0.261705	-0.0489096	-5040
0.22219	-0.0651337	-5040
0.28153	-0.0896404	-5040
-0.15878	-0.176683	-5040
-0.0965829	-0.188897	-5040
-0.0924225	-0.222528	-5040
-0.128299	-0.285383	-5040
0.236053	0.0879242	-4920
0.245618	0.0691813	-4920
0.312876	0.0266486	-4920
0.386785	-0.0321647	-4920
0.302013	-0.127348	-4920
0.311751	-0.167388	-4920
0.249693	-0.207352	-4920
0.177754	-0.466795	-4920
-0.463375	-0.151614	-4920
-0.161471	-0.159736	-4920
-0.121761	-0.156219	-4920
-0.200417	-0.209627	-4920
-0.0562056	-0.227375	-4920
-0.138701	-0.261662	-4920
-0.136151	-0.30507	-4920
0.357217	0.450011	-4800
0.300921	0.108126	-4800
0.178404	0.0841165	-4800
0.283578	0.0715524	-4800
0.261156	0.0544102	-4800
0.227523	-0.0391375	-4800
0.0413944	-0.117011	-4800
0.329065	-0.0588146	-4800
0.269933	-0.0794546	-4800
0.0484835	-0.143301	-4800
0.24901	-0.111618	-4800
0.218717	-0.270536	-4800
0.200153	-0.452172	-4800
-0.156998	-0.131212	-4800
-0.0911069	-0.165822	-4800
-0.0613276	-0.167691	-4800
-0.149318	-0.204009	-4800
-0.0793272	-0.196645	-4800
-0.0791657	-0.221386	-4800
-0.0754521	-0.244564	-4800
-0.109851	-0.301385	-4800
0.171961	-0.476827	-4680
-0.146028	-0.184584	-4680
-0.0679276	-0.21837	-4680
-0.137516	-0.228583	-4680
0.208431	0.0949774	-4560
0.300368	0.0707296	-4560
0.33832	0.0334862	-4560
0.156104	0.00436833	-4560
0.200455	-0.000970603	-4560
0.0423816	-0.0336181	-4560
0.286697	-0.0158385	-4560
0.21844	-0.0359344	-4560
0.190151	-0.044133	-4560
0.187581	-0.0701996	-4560
0.220653	-0.0733173	-4560
0.283168	-0.0707216	-4560
0.241526	-0.0828174	-4560
0.210932	-0.0873101	-4560
0.289775	-0.0944132	-4560
0.147417	-0.115958	-4560
0.113301	-0.131046	-4560
0.287049	-0.174885	-4560
-0.0591881	-0.0982426	-4560
-0.0901584	-0.130016	-4560
-0.177236	-0.177268	-4560
-0.08067	-0.197072	-4560
-0.132596	-0.215323	-4560
-0.0458895	-0.25436	-4560
0.22482	0.151541	-4440
0.248773	0.122626	-4440
0.180442	0.0270582	-4440
0.0789371	0.0142589	-4440
0.175312	0.000980532	-4440
0.254661	-0.267497	-4440
-0.387786	0.461362	-4440
-0.173072	0.0378361	-4440
-0.135888	-0.130265	-4440
-0.126969	-0.17849	-4440
-0.102391	-0.195811	-4440
-0.141659	-0.258055	-4440
0.155097	0.0996348	-4320
0.136779	0.0432356	-4320
0.166535	-0.0224392	-4320
0.22193	-0.0237977	-4320
0.17963	-0.127284	-4320
0.204464	-0.160673	-4320
0.1852	-0.179423	-4320
-0.125778	-0.100082	-4320
-0.0799521	-0.148271	-4320
-0.126809	-0.176228	-4320
-0.117755	-0.217235	-4320
-0.107388	-0.292183	-4320
0.259348	0.128877	-4080
0.238423	0.113281	-4080
0.223941	0.0682589	-4080
0.181145	0.0508247	-4080
0.149603	0.0456558	-4080
0.221857	0.0311023	-4080
0.0595795	-0.00257193	-4080
0.14838	-0.00446354	-4080
0.230903	-0.00679488	-4080
0.272851	-0.0438888	-4080
0.228779	-0.0369528	-4080
0.252787	-0.0511234	-4080
0.292132	-0.0475475	-4080
0.219346	-0.0826585	-4080
0.221009	-0.113812	-4080
0.168595	-0.152482	-4080
0.154704	-0.196479	-4080
0.23064	-0.20972	-4080
0.266376	-0.249278	-4080
-0.226317	-0.13569	-4080
-0.0814054	-0.12865	-4080
-0.167466	-0.147509	-4080
0.234445	0.11944	-3960
0.0895264	0.0334569	-3960
0.239865	-0.0040488	-3960
0.168523	-0.0211701	-3960
0.137116	-0.0267343	-3960
0.273788	-0.0210859	-3960
0.194869	-0.0616581	-3960
0.245489	-0.0668549	-3960
0.272371	-0.0726105	-3960
0.200381	-0.0835859	-3960
0.28646	-0.0942705	-3960
0.252058	-0.0960767	-3960
0.194686	-0.11443	-3960
0.232365	-0.143851	-3960
0.304638	-0.140682	-3960
0.272991	-0.177971	-3960
0.235861	-0.225355	-3960
-0.157129	-0.10801	-3960
-0.142712	-0.120639	-3960
-0.191477	-0.137898	-3960
-0.0955154	-0.19519	-3960
-0.125233	-0.238923	-3960
-0.137039	-0.244653	-3960
-0.109853	-0.26772	-3960
0.0620785	0.0886673	-3840
0.261241	0.106943	-3840
0.146825	0.0794118	-3840
0.244345	0.0907636	-3840
0.201895	0.0798183	-3840
0.275089	0.0813111	-3840
0.108421	0.0495236	-3840
0.263679	0.0688032	-3840
0.160952	0.0486596	-3840
0.291522	0.0644327	-3840
0.274142	0.051118	-3840
0.0722214	0.00618727	-3840
0.156545	0.00594588	-3840
0.228843	-0.00743533	-3840
0.240151	-0.0184185	-3840
0.267989	-0.0174749	-3840
0.0405053	-0.0537996	-3840
0.277593	-0.026118	-3840
0.252187	-0.046677	-3840
0.158606	-0.0617148	-3840
0.285369	-0.0589866	-3840
0.125078	-0.0748385	-3840
0.203865	-0.0603129	-3840
0.311187	-0.0429243	-3840
0.276987	-0.0544035	-3840
0.245597	-0.0591537	-3840
0.0782878	-0.088868	-3840
0.198898	-0.0788231	-3840
0.275791	-0.0778148	-3840
0.244334	-0.0823224	-3840
0.183559	-0.0983307	-3840
0.237866	-0.0930629	-3840
0.282061	-0.113449	-3840
0.280666	-0.127662	-3840
0.298469	-0.134984	-3840
0.301466	-0.153149	-3840
0.227224	-0.16486	-3840
0.265251	-0.167971	-3840
0.196236	-0.230829	-3840
-0.355083	0.130659	-3840
-0.135755	-0.043242	-3840
-0.111827	-0.0568162	-3840
-0.102586	-0.0832162	-3840
-0.141147	-0.0951108	-3840
-0.120571	-0.101081	-3840
-0.0368248	-0.108594	-3840
-0.157858	-0.148985	-3840
-0.0532378	-0.177641	-3840
-0.0874863	-0.189627	-3840
-0.123431	-0.206595	-3840
-0.0727942	-0.206218	-3840
-0.00387447	-0.204104	-3840
-0.0717448	-0.242564	-3840
0.230554	0.174176	-3720
0.236702	0.129609	-3720
0.254397	0.113033	-3720
0.290123	0.107366	-3720
0.125986	0.0662889	-3720
0.241402	0.0732925	-3720
0.272349	0.0663494	-3720
0.0152276	0.0295104	-3720
0.101422	0.0349879	-3720
0.0225311	0.0167044	-3720
0.270481	0.0272212	-3720
0.215504	0.0294802	-3720
0.108333	0.0234134	-3720
0.228642	0.0185101	-3720
0.163809	0.00738894	-3720
0.181939	-0.00834821	-3720
0.221952	-0.0284587	-3720
0.242415	-0.0433935	-3720
0.264033	-0.0608149	-3720
0.255517	-0.091994	-3720
0.309174	-0.123921	-3720
0.360149	-0.115643	-3720
0.27854	-0.144998	-3720
0.273512	-0.176349	-3720
0.228977	-0.197457	-3720
-0.0765311	-0.0847362	-3720
-0.006224	-0.10399	-3720
-0.0886902	-0.116773	-3720
-0.163976	-0.142895	-3720
-0.161686	-0.170831	-3720
-0.104371	-0.171146	-3720
-0.0721089	-0.196249	-3720
-0.121915	-0.214765	-3720
-0.109419	-0.226007	-3720
-0.135669	-0.241301	-3720
0.282599	0.11872	-3600
0.315497	0.10568	-3600
0.329238	0.089947	-3600
0.0832227	0.0518516	-3600
0.204479	0.0484272	-3600
0.258558	0.050062	-3600
0.292994	0.0461034	-3600
0.20103	0.0419097	-3600
0.129848	0.0253275	-3600
0.30267	0.029628	-3600
0.268532	0.0237782	-3600
0.301044	0.0086544	-3600
0.33781	0.00746843	-3600
0.275864	-0.0015864	-3600
0.216242	-0.0150674	-3600
0.167489	-0.0160447	-3600
0.288759	-0.0403226	-3600
0.344925	-0.0562469	-3600
0.226514	-0.0654306	-3600
0.275518	-0.0639513	-3600
0.275552	-0.0840858	-3600
0.306085	-0.0787041	-3600
0.333507	-0.108718	-3600
0.307088	-0.108223	-3600
0.252656	-0.120841	-3600
0.324719	-0.138177	-3600
0.299526	-0.167824	-3600
0.225999	-0.161324	-3600
0.318532	-0.165421	-3600
0.283826	-0.21393	-3600
-0.112001	-0.141743	-3600
-0.0906864	-0.15226	-3600
-0.0796395	-0.16472	-3600
-0.0855756	-0.186618	-3600
-0.11659	-0.194296	-3600
0.213463	0.200271	-3480
0.172414	0.100345	-3480
0.219424	0.105299	-3480
0.153584	0.0710726	-3480
0.179072	0.0400336	-3480
0.0497129	-0.039792	-3480
0.202382	-0.00931981	-3480
0.0556394	-0.0546588	-3480
0.263039	-0.00692287	-3480
0.198258	-0.057664	-3480
0.315306	-0.0617048	-3480
0.264992	-0.0917715	-3480
0.321027	-0.111548	-3480
0.22888	-0.187931	-3480
-0.21631	-0.0210673	-3480
-0.123624	-0.0483879	-3480
-0.0677117	-0.0821105	-3480
-0.111475	-0.0942282	-3480
0.238938	0.126978	-3360
0.120911	0.113641	-3360
0.254567	0.105107	-3360
0.319902	0.103989	-3360
0.111132	0.0826661	-3360
0.207569	0.0879031	-3360
0.278605	0.0867345	-3360
0.137086	0.0583351	-3360
0.245695	0.0151987	-3360
0.147158	-0.0025679	-3360
0.067019	-0.00859751	-3360
0.227236	-0.0110803	-3360
0.15723	-0.0409588	-3360
0.252317	-0.0451653	-3360
0.29465	-0.056501	-3360
0.248566	-0.0791227	-3360
0.283978	-0.0740365	-3360
0.173276	-0.100092	-3360
0.239974	-0.102432	-3360
0.323161	-0.123139	-3360
0.304293	-0.130871	-3360
0.218494	-0.131722	-3360
0.276048	-0.150896	-3360
0.310512	-0.228621	-3360
-0.12932	-0.0893149	-3360
-0.118135	-0.0914492	-3360
-0.18411	-0.116889	-3360
-0.119609	-0.151196	-3360
-0.0825867	-0.149317	-3360
-0.0961762	-0.160261	-3360
-0.125959	-0.181844	-3360
-0.0703919	-0.190093	-3360
-0.0504062	-0.191741	-3360
-0.094064	-0.226724	-3360
0.194832	0.159084	-3240
0.291615	0.183985	-3240
0.274088	0.146553	-3240
0.0716102	0.0672296	-3240
0.287461	0.0916211	-3240
0.0891179	0.0551286	-3240
0.161454	0.0570519	-3240
0.280874	0.0718704	-3240
0.267572	0.06645	-3240
0.153775	0.0429474	-3240
0.114908	0.0225337	-3240
0.11858	0.00668799	-3240
0.0639638	-0.00205061	-3240
0.127035	-0.0187529	-3240
0.204205	-0.0167649	-3240
0.256606	-0.00028959	-3240
0.154622	-0.0238246	-3240
0.176265	-0.0364257	-3240
0.212417	-0.0422488	-3240
0.327773	-0.043188	-3240
0.236903	-0.0622305	-3240
0.301849	-0.0513122	-3240
0.220223	-0.0744558	-3240
0.275873	-0.0863212	-3240
0.327112	-0.0885127	-3240
0.289985	-0.125103	-3240
0.27916	-0.164119	-3240
0.292039	-0.168432	-3240
0.293984	-0.258901	-3240
-0.0983001	-0.0861153	-3240
-0.144884	-0.115111	-3240
-0.212889	-0.189154	-3240
-0.101218	-0.232934	-3240
0.120837	0.214144	-3120
0.072257	0.190685	-3120
0.125423	0.206076	-3120
0.123549	0.175952	-3120
0.241837	0.212346	-3120
0.201502	0.182558	-3120
0.218869	0.192125	-3120
0.246925	0.187806	-3120
0.141362	0.144519	-3120
0.247031	0.166458	-3120
0.0972892	0.104675	-3120
0.161094	0.0956787	-3120
0.17103	0.101306	-3120
0.281564	0.129764	-3120
0.197864	0.0980538	-3120
0.18129	0.0766409	-3120
0.208676	0.0831598	-3120
0.12322	0.0410427	-3120
0.255934	0.0831671	-3120
0.166701	0.0482559	-3120
0.233887	0.0453838	-3120
0.263488	0.0489429	-3120
0.232247	0.0228527	-3120
0.190885	0.0166188	-3120
0.191237	-0.0156835	-3120
0.223951	-0.0122148	-3120
0.115677	-0.0543005	-3120
0.245028	-0.0174774	-3120
0.259103	-0.0106368	-3120
0.29738	-0.00823998	-3120
0.265117	-0.0288958	-3120
0.223231	-0.043619	-3120
0.196732	-0.06458	-3120
0.28635	-0.0379471	-3120
0.184782	-0.0771	-3120
0.303143	-0.0430682	-3120
0.23348	-0.091533	-3120
0.303405	-0.0867096	-3120
0.285039	-0.10738	-3120
0.239605	-0.153895	-3120
0.140481	-0.216711	-3120
0.317302	-0.156299	-3120
0.296275	-0.25669	-3120
-0.00206524	0.16022	-3120
-0.254595	-0.0908116	-3120
-0.111952	-0.167822	-3120
-0.0924456	-0.182187	-3120
-0.0800051	-0.177915	-3120
-0.0594569	-0.191692	-3120
-0.14749	-0.21677	-3120
-0.0787059	-0.199132	-3120
-0.0736562	-0.213234	-3120
-0.105971	-0.254534	-3120
0.0211221	0.165049	-3000
0.257256	0.153179	-3000
0.241989	0.146651	-3000
0.140969	0.0984081	-3000
0.24785	0.0980158	-3000
0.157869	0.0875811	-3000
0.264504	0.0862787	-3000
0.28579	0.0861532	-3000
0.114409	0.0618395	-3000
0.144842	0.0610392	-3000
0.311428	0.0614472	-3000
0.290552	0.0519618	-3000
0.13879	0.0337363	-3000
0.204137	0.0337677	-3000
0.282744	0.0325595	-3000
0.0730598	0.0127414	-3000
0.246197	0.0163974	-3000
0.258636	0.00258122	-3000
0.100084	-0.0228546	-3000
0.335979	-0.0105807	-3000
0.0552713	-0.0464009	-3000
0.268323	-0.0293732	-3000
0.279547	-0.042617	-3000
0.323936	-0.0483485	-3000
0.24024	-0.0732621	-3000
0.34361	-0.0691363	-3000
0.266813	-0.0819746	-3000
0.319926	-0.0754323	-3000
0.302868	-0.0829365	-3000
0.312364	-0.0897492	-3000
0.269874	-0.116125	-3000
0.344798	-0.118995	-3000
0.3017	-0.193521	-3000
0.300942	-0.222306	-3000
0.226038	-0.246433	-3000
0.186697	-0.243261	-3000
-0.278884	0.0282237	-3000
-0.056398	-0.0234755	-3000
-0.0393877	-0.0699732	-3000
-0.105633	-0.134758	-3000
-0.106262	-0.155934	-3000
-0.0879354	-0.176932	-3000
-0.130479	-0.198732	-3000
-0.158224	-0.242243	-3000
0.16875	0.231742	-2880
0.0959841	0.188752	-2880
0.0492537	0.152271	-2880
0.253869	0.144861	-2880
0.361478	0.121536	-2880
0.19955	0.0963969	-2880
0.280272	0.104536	-2880
0.242422	0.0929137	-2880
0.263191	0.0919799	-2880
0.158694	0.0808624	-2880
0.178029	0.0823893	-2880
0.0872627	0.0715785	-2880
0.143076	0.07104	-2880
0.319561	0.0761387	-2880
0.202925	0.0625809	-2880
0.089143	0.00140417	-2880
0.211408	0.00680272	-2880
0.237927	0.013176	-2880
0.141245	-0.0111434	-2880
0.252791	-0.00963484	-2880
0.265322	-0.0228021	-2880
0.232831	-0.0335233	-2880
0.302345	-0.029277	-2880
0.134593	-0.0426118	-2880
0.356639	-0.0300592	-2880
0.270559	-0.0401473	-2880
0.249343	-0.0504091	-2880
0.170208	-0.0616642	-2880
0.330794	-0.0505953	-2880
0.266541	-0.0750115	-2880
0.284455	-0.0785066	-2880
0.346099	-0.0806173	-2880
0.304421	-0.088694	-2880
0.197505	-0.102376	-2880
0.29818	-0.121261	-2880
0.326807	-0.12421	-2880
0.239342	-0.200891	-2880
0.290647	-0.204523	-2880
-0.0128011	-0.0104148	-2880
-0.413229	-0.0980266	-2880
-0.0998729	-0.0845177	-2880
-0.135923	-0.0992405	-2880
-0.124925	-0.103045	-2880
-0.0875208	-0.109226	-2880
-0.0829291	-0.149819	-2880
-0.145619	-0.192922	-2880
0.264381	0.182523	-2760
0.164627	0.166516	-2760
0.115814	0.160078	-2760
0.187621	0.14865	-2760
0.128586	0.150472	-2760
0.0918122	0.140661	-2760
0.143694	0.124911	-2760
0.186399	0.125984	-2760
0.223436	0.128497	-2760
0.079404	0.107713	-2760
0.276025	0.121912	-2760
0.248384	0.119399	-2760
0.294541	0.106515	-2760
0.173089	0.100165	-2760
0.262746	0.091934	-2760
0.185009	0.0747804	-2760
0.212681	0.0681366	-2760
0.079786	0.0557675	-2760
0.120424	0.052225	-2760
0.160198	0.0516885	-2760
0.149563	0.0398045	-2760
0.304274	0.0562599	-2760
0.294603	0.0441995	-2760
0.215231	0.0323742	-2760
0.210188	0.0170727	-2760
0.357634	0.0308749	-2760
0.270538	0.0197185	-2760
0.254084	0.0191894	-2760
0.331202	0.00565906	-2760
0.163781	-0.00607537	-2760
0.146362	-0.0115067	-2760
0.279176	-0.000287087	-2760
0.230883	-0.0112584	-2760
0.300604	-0.0110102	-2760
0.109538	-0.029213	-2760
0.204651	-0.0218806	-2760
0.256614	-0.0368014	-2760
0.152645	-0.0491384	-2760
0.183443	-0.053949	-2760
0.305583	-0.0477262	-2760
0.287118	-0.0519937	-2760
0.340347	-0.0578751	-2760
0.228848	-0.0869717	-2760
0.306899	-0.0784445	-2760
0.0611768	-0.108751	-2760
0.179553	-0.104282	-2760
0.214404	-0.106269	-2760
0.270069	-0.106757	-2760
0.336469	-0.132362	-2760
0.315254	-0.126559	-2760
0.273326	-0.144886	-2760
0.22658	-0.1716	-2760
0.32854	-0.170553	-2760
0.306442	-0.185667	-2760
0.27952	-0.190765	-2760
0.249324	-0.199649	-2760
-0.128067	0.0548644	-2760
-0.170399	0.0483917	-2760
-0.270704	-0.105643	-2760
-0.185944	-0.104129	-2760
-0.113721	-0.128704	-2760
-0.245918	-0.146398	-2760
-0.171413	-0.141702	-2760
-0.123599	-0.157812	-2760
-0.078463	-0.163489	-2760
0.280473	0.208128	-2640
0.143004	0.16804	-2640
0.176673	0.132678	-2640
0.0623134	0.0957476	-2640
0.194133	0.111144	-2640
0.0336935	0.086538	-2640
0.246818	0.110551	-2640
0.217686	0.0947023	-2640
0.103877	0.0742773	-2640
0.2002	0.0766998	-2640
0.0839681	0.0595942	-2640
0.118155	0.0459987	-2640
0.144187	0.0368526	-2640
0.287192	0.0517406	-2640
0.243471	0.0189419	-2640
0.284668	0.0102337	-2640
0.243016	-0.0039168	-2640
0.0643504	-0.0417302	-2640
0.15412	-0.0288032	-2640
0.323498	-0.00945142	-2640
0.283573	-0.0224016	-2640
0.305968	-0.0309629	-2640
0.271781	-0.047141	-2640
0.163622	-0.0773452	-2640
0.36243	-0.0615464	-2640
0.297162	-0.0710985	-2640
0.185276	-0.103609	-2640
0.263551	-0.104894	-2640
0.305095	-0.0957682	-2640
0.357793	-0.118472	-2640
0.32384	-0.147693	-2640
0.29961	-0.192101	-2640
0.278051	-0.222762	-2640
0.253549	-0.263556	-2640
-0.289179	-0.0633521	-2640
-0.143161	-0.0971947	-2640
-0.21307	-0.15014	-2640
-0.197345	-0.172541	-2640
-0.149022	-0.174573	-2640
-0.116303	-0.192984	-2640
-0.138936	-0.202291	-2640
-0.159454	-0.214038	-2640
-0.0867485	-0.212349	-2640
-0.0951316	-0.22738	-2640
-0.177829	-0.235784	-2640
-0.126128	-0.246147	-2640
0.220839	0.185145	-2520
0.104563	0.157817	-2520
0.252847	0.166702	-2520
0.27171	0.150308	-2520
0.105155	0.135033	-2520
0.265923	0.140606	-2520
0.15206	0.128439	-2520
0.273301	0.106388	-2520
0.163773	0.0829615	-2520
0.262129	0.0901151	-2520
0.108427	0.0619773	-2520
0.306666	0.0681478	-2520
0.143115	0.0426264	-2520
0.129581	0.0262171	-2520
0.311313	0.0432389	-2520
0.236455	0.0224815	-2520
0.157585	0.00831052	-2520
0.27297	0.00548994	-2520
0.196991	-0.0163092	-2520
0.312548	-0.013479	-2520
0.259901	-0.0100733	-2520
0.332894	-0.00264624	-2520
0.0612797	-0.0330501	-2520
0.155943	-0.0385744	-2520
0.207578	-0.0528209	-2520
0.265592	-0.0531007	-2520
0.330227	-0.054164	-2520
0.304966	-0.0597203	-2520
0.265847	-0.0710968	-2520
0.19102	-0.0797391	-2520
0.273671	-0.0896844	-2520
0.324236	-0.088781	-2520
0.298441	-0.10274	-2520
0.285709	-0.0983667	-2520
0.375661	-0.112453	-2520
0.318755	-0.133367	-2520
0.354265	-0.145224	-2520
0.285779	-0.185589	-2520
0.269475	-0.223268	-2520
0.253121	-0.303662	-2520
0.258437	-0.436462	-2520
0.258589	-0.45529	-2520
-0.275513	0.158578	-2520
-0.0455571	-0.122197	-2520
-0.14042	-0.170334	-2520
-0.102206	-0.179339	-2520
-0.121432	-0.19615	-2520
-0.211022	-0.222125	-2520
-0.205436	-0.239743	-2520
-0.158954	-0.287216	-2520
0.217092	0.260533	-2400
0.116841	0.206919	-2400
0.19511	0.224839	-2400
0.165543	0.168392	-2400
0.131558	0.160206	-2400
0.262875	0.191471	-2400
0.20562	0.167345	-2400
0.199557	0.129584	-2400
0.232094	0.143948	-2400
0.180383	0.12204	-2400
0.268692	0.14811	-2400
0.286071	0.154028	-2400
0.249098	0.143435	-2400
0.157864	0.104735	-2400
0.100095	0.0881594	-2400
0.256487	0.122813	-2400
0.232581	0.114974	-2400
0.206135	0.108463	-2400
0.239723	0.10032	-2400
0.0841476	0.0574796	-2400
0.209955	0.0931884	-2400
0.0927112	0.0466484	-2400
0.253506	0.0778485	-2400
0.236647	0.0856883	-2400
0.110163	0.043209	-2400
0.145239	0.0516052	-2400
0.272266	0.0836868	-2400
0.228173	0.0675015	-2400
0.206465	0.0531225	-2400
0.289035	0.0784627	-2400
0.168441	0.0347623	-2400
0.236893	0.046634	-2400
0.217165	0.0381656	-2400
0.108451	0.000838168	-2400
0.30228	0.0591776	-2400
0.198449	0.0219297	-2400
0.256795	0.0288012	-2400
0.269542	0.0393217	-2400
0.192739	0.0136491	-2400
0.276886	0.0232447	-2400
0.313137	0.00596111	-2400
0.131155	-0.0187106	-2400
0.120264	-0.0337597	-2400
0.103283	-0.0350242	-2400
0.0795051	-0.0521716	-2400
0.240081	-0.00152853	-2400
0.219559	-0.0189468	-2400
0.185937	-0.0275205	-2400
0.274162	-0.00499552	-2400
0.335668	-0.000778161	-2400
0.12465	-0.0613358	-2400
0.30063	-0.0201697	-2400
0.244058	-0.0388664	-2400
0.350597	-0.0134789	-2400
0.324302	-0.0291394	-2400
0.336445	-0.0236644	-2400
0.173945	-0.0775313	-2400
0.18856	-0.0734876	-2400
0.315783	-0.0432088	-2400
0.284566	-0.0633368	-2400
0.300843	-0.0757457	-2400
0.29629	-0.091691	-2400
0.21495	-0.120261	-2400
0.350356	-0.0965476	-2400
0.230908	-0.143967	-2400
0.361515	-0.112479	-2400
0.273334	-0.184362	-2400
0.254322	-0.236165	-2400
0.228453	-0.290866	-2400
-0.119793	-0.0121357	-2400
-0.102043	-0.154043	-2400
-0.0382306	-0.155109	-2400
-0.0690643	-0.185065	-2400
-0.116025	-0.211591	-2400
-0.159345	-0.273139	-2400
-0.12828	-0.271102	-2400
-0.157455	-0.286192	-2400
0.220585	0.161042	-2280
0.229593	0.161715	-2280
0.180943	0.150705	-2280
0.148779	0.143638	-2280
0.152862	0.126029	-2280
0.250417	0.134947	-2280
0.275	0.12597	-2280
0.0879805	0.105098	-2280
0.235326	0.112041	-2280
0.312165	0.119752	-2280
0.255017	0.108295	-2280
0.160436	0.0691267	-2280
0.221961	0.0705387	-2280
0.244002	0.0631278	-2280
0.311063	0.066237	-2280
0.103836	0.0352328	-2280
0.125521	0.0317724	-2280
0.287537	0.0452993	-2280
0.257093	0.0356571	-2280
0.154633	0.024003	-2280
0.202194	0.0233519	-2280
0.337232	0.025693	-2280
0.298844	0.0111419	-2280
0.323001	0.00744745	-2280
0.35398	0.0115223	-2280
0.0654741	-0.00839397	-2280
0.283651	-0.0152482	-2280
0.212151	-0.021879	-2280
0.344895	-0.0261091	-2280
0.20564	-0.0394533	-2280
0.239492	-0.0448755	-2280
0.22356	-0.0626568	-2280
0.347864	-0.0523423	-2280
0.281925	-0.0772013	-2280
0.318535	-0.0723835	-2280
0.33548	-0.0786997	-2280
0.292391	-0.0990637	-2280
0.290378	-0.1323	-2280
0.339264	-0.145694	-2280
0.327498	-0.160669	-2280
0.358108	-0.174245	-2280
0.332416	-0.185354	-2280
0.283804	-0.19177	-2280
0.218031	-0.214179	-2280
-0.256691	0.172907	-2280
-0.156609	-0.122545	-2280
-0.1789	-0.152016	-2280
-0.0582256	-0.150011	-2280
-0.136637	-0.16552	-2280
-0.190398	-0.179047	-2280
-0.0906199	-0.16986	-2280
-0.112014	-0.18724	-2280
-0.0915998	-0.184675	-2280
-0.277988	-0.230837	-2280
-0.136133	-0.230466	-2280
0.0973441	0.160302	-2160
0.246217	0.151955	-2160
0.159473	0.146408	-2160
0.0746928	0.134575	-2160
0.218912	0.141416	-2160
0.244732	0.139324	-2160
0.178706	0.132997	-2160
0.20724	0.130924	-2160
0.23543	0.132259	-2160
0.18905	0.121123	-2160
0.118376	0.107683	-2160
0.245262	0.124124	-2160
0.255862	0.121365	-2160
0.271483	0.118831	-2160
0.229594	0.102142	-2160
0.203273	0.0951003	-2160
0.166643	0.077218	-2160
0.237649	0.0788662	-2160
0.0637428	0.0492988	-2160
0.102074	0.0543793	-2160
0.205353	0.0559862	-2160
0.125861	0.0402484	-2160
0.231225	0.0362194	-2160
0.19156	0.0351265	-2160
0.348162	0.051266	-2160
0.328348	0.0382161	-2160
0.149339	0.0105628	-2160
0.186516	0.0156078	-2160
0.293599	0.0181304	-2160
0.269136	0.0154601	-2160
0.0470091	-0.00596046	-2160
0.106238	-0.0108033	-2160
0.224492	-0.00606589	-2160
0.284787	-0.00353551	-2160
0.312627	-0.00149714	-2160
0.188957	-0.0255217	-2160
0.228167	-0.0250578	-2160
0.322284	-0.0149293	-2160
0.13345	-0.0426088	-2160
0.281129	-0.0233498	-2160
0.295894	-0.0306036	-2160
0.296296	-0.0428408	-2160
0.209552	-0.059471	-2160
0.185491	-0.0619381	-2160
0.347207	-0.0510153	-2160
0.269049	-0.0792291	-2160
0.23271	-0.0834112	-2160
0.186429	-0.100126	-2160
0.251506	-0.107668	-2160
0.352636	-0.0998376	-2160
0.301794	-0.121683	-2160
0.242955	-0.170934	-2160
0.314538	-0.171595	-2160
0.252764	-0.178793	-2160
0.344109	-0.189905	-2160
0.298352	-0.202424	-2160
0.228254	-0.218302	-2160
0.349671	-0.212116	-2160
0.226612	-0.291423	-2160
-0.156178	0.216857	-2160
-0.224285	-0.115844	-2160
-0.108218	-0.118737	-2160
-0.0829945	-0.136758	-2160
-0.0617775	-0.170867	-2160
-0.117615	-0.174894	-2160
-0.239055	-0.216427	-2160
-0.161917	-0.216252	-2160
-0.0761389	-0.204394	-2160
-0.286902	-0.249023	-2160
0.284156	0.233345	-2040
0.13332	0.193168	-2040
0.304008	0.211596	-2040
0.217934	0.174739	-2040
0.257296	0.180067	-2040
0.239925	0.162972	-2040
0.200058	0.160875	-2040
0.143278	0.144558	-2040
0.191306	0.151435	-2040
0.223376	0.139765	-2040
0.186756	0.121719	-2040
0.0965773	0.107812	-2040
0.257661	0.124518	-2040
0.175934	0.113237	-2040
0.152604	0.104041	-2040
0.206161	0.112571	-2040
0.135453	0.0965387	-2040
0.177331	0.0981363	-2040
0.224327	0.0967193	-2040
0.259278	0.101728	-2040
0.145857	0.0618701	-2040
0.0782379	0.0446295	-2040
0.214891	0.0603002	-2040
0.270541	0.061488	-2040
0.184733	0.0413162	-2040
0.0869149	0.00696012	-2040
0.335731	0.0537985	-2040
0.239496	0.0252495	-2040
0.23221	0.0115724	-2040
0.313618	0.00245202	-2040
0.149178	-7.85367e-06	-2040
0.225689	-0.00984065	-2040
0.282823	-0.0157466	-2040
0.243976	-0.0345561	-2040
0.338531	-0.0221159	-2040
0.297029	-0.0410668	-2040
0.238794	-0.058824	-2040
0.305898	-0.0619419	-2040
0.248654	-0.0772801	-2040
0.347967	-0.0550778	-2040
0.176264	-0.0996317	-2040
0.268976	-0.080885	-2040
0.358377	-0.0783089	-2040
0.197148	-0.115308	-2040
0.230732	-0.107666	-2040
0.270633	-0.0954928	-2040
0.213766	-0.117279	-2040
0.288167	-0.133976	-2040
0.244538	-0.142371	-2040
0.268912	-0.144123	-2040
0.287668	-0.162657	-2040
0.0649587	-0.230097	-2040
0.281577	-0.20286	-2040
0.302263	-0.20707	-2040
-0.0195009	0.048294	-2040
-0.0456843	0.0182202	-2040
-0.165135	-0.0222641	-2040
-0.126404	-0.0940905	-2040
-0.0794938	-0.104496	-2040
-0.0348972	-0.103197	-2040
-0.167401	-0.143667	-2040
-0.0450653	-0.132132	-2040
-0.093574	-0.161712	-2040
-0.0766573	-0.19323	-2040
-0.110929	-0.206747	-2040
-0.166313	-0.226296	-2040
0.118625	0.210346	-1920
0.14492	0.190004	-1920
0.164097	0.180007	-1920
0.249171	0.170656	-1920
0.219863	0.164079	-1920
0.123632	0.133788	-1920
0.0530261	0.108045	-1920
0.229527	0.149864	-1920
0.133425	0.125854	-1920
0.194297	0.136609	-1920
0.18117	0.126727	-1920
0.209732	0.135179	-1920
0.228356	0.13849	-1920
0.286115	0.141057	-1920
0.166487	0.114736	-1920
0.219618	0.119257	-1920
0.180412	0.100306	-1920
0.0931119	0.0746297	-1920
0.189354	0.0891404	-1920
0.243278	0.0955829	-1920
0.146021	0.0578012	-1920
0.232966	0.0741393	-1920
0.205366	0.0686776	-1920
0.129112	0.0441839	-1920
0.182505	0.0494777	-1920
0.260467	0.0594471	-1920
0.132475	0.0282019	-1920
0.216983	0.0469719	-1920
0.0964752	0.000450102	-1920
0.384671	0.0712976	-1920
0.110651	0.00390313	-1920
0.324306	0.0414161	-1920
0.302599	0.0333613	-1920
0.229108	0.0173525	-1920
0.193306	0.00652984	-1920
0.249159	0.00742333	-1920
0.385744	0.0424977	-1920
0.293401	0.0098082	-1920
0.0673595	-0.00541002	-1920
0.206975	-0.0029874	-1920
0.311354	-0.00413926	-1920
0.189838	-0.0522498	-1920
0.212238	-0.0449894	-1920
0.342906	-0.0350834	-1920
0.1606	-0.0804593	-1920
0.157114	-0.100085	-1920
0.355037	-0.054509	-1920
0.280641	-0.0858396	-1920
0.262508	-0.0966299	-1920
0.311762	-0.0829488	-1920
0.251893	-0.107257	-1920
0.218091	-0.13751	-1920
0.29199	-0.14969	-1920
0.377991	-0.124349	-1920
0.250902	-0.216386	-1920
0.324335	-0.209824	-1920
0.290947	-0.232549	-1920
0.249305	-0.292193	-1920
-0.149614	0.0297707	-1920
-0.147869	-0.110172	-1920
-0.100159	-0.162606	-1920
-0.0955211	-0.178015	-1920
-0.0659624	-0.183109	-1920
-0.143899	-0.208222	-1920
-0.126075	-0.250671	-1920
-0.242225	-0.279897	-1920
0.146151	0.191201	-1800
0.208638	0.196495	-1800
0.148872	0.181845	-1800
0.184666	0.187306	-1800
0.250131	0.196858	-1800
0.33525	0.215592	-1800
0.24485	0.188822	-1800
0.271776	0.170943	-1800
0.256497	0.16575	-1800
0.23528	0.157613	-1800
0.266234	0.157692	-1800
0.200578	0.126099	-1800
0.280661	0.141576	-1800
0.22068	0.12517	-1800
0.251465	0.125772	-1800
0.0951126	0.095963	-1800
0.235193	0.0974209	-1800
0.274254	0.0964272	-1800
0.259311	0.100924	-1800
0.22426	0.089624	-1800
0.0730609	0.0556515	-1800
0.287137	0.0912632	-1800
0.0596442	0.0424657	-1800
0.124598	0.0408918	-1800
0.239581	0.0606342	-1800
0.25009	0.0534756	-1800
0.182037	0.0385564	-1800
0.196388	0.0398619	-1800
0.279976	0.0492109	-1800
0.290891	0.0290986	-1800
0.335993	0.0294395	-1800
0.311313	0.0116481	-1800
0.359536	0.00536714	-1800
0.0864776	-0.00308105	-1800
0.0461636	-0.0413401	-1800
0.221579	-0.0081235	-1800
0.142849	-0.0417133	-1800
0.242383	-0.020146	-1800
0.168922	-0.0378144	-1800
0.282407	-0.018661	-1800
0.31205	-0.01369	-1800
0.252225	-0.0332166	-1800
0.295395	-0.0261651	-1800
0.194926	-0.0559116	-1800
0.322333	-0.0447705	-1800
0.198843	-0.0902002	-1800
0.313013	-0.0685772	-1800
0.335181	-0.070618	-1800
0.249208	-0.101683	-1800
0.320667	-0.0921219	-1800
0.208633	-0.115095	-1800
0.174511	-0.13077	-1800
0.281525	-0.124108	-1800
0.347454	-0.131334	-1800
0.324253	-0.16374	-1800
0.292545	-0.198132	-1800
0.24178	-0.252996	-1800
-0.094941	-0.0877874	-1800
-0.21995	-0.124419	-1800
-0.275736	-0.142422	-1800
-0.238957	-0.152978	-1800
-0.145338	-0.165332	-1800
-0.21905	-0.211202	-1800
-0.0602297	-0.180627	-1800
-0.178349	-0.248344	-1800
-0.19874	-0.282559	-1800
0.28514	0.206873	-1680
0.132967	0.180838	-1680
0.160396	0.182222	-1680
0.12864	0.171168	-1680
0.189393	0.170465	-1680
0.243517	0.17251	-1680
0.338063	0.180738	-1680
0.257366	0.152155	-1680
0.289074	0.150259	-1680
0.219225	0.142769	-1680
0.111331	0.111743	-1680
0.246411	0.124515	-1680
0.338898	0.129294	-1680
0.253055	0.125446	-1680
0.250803	0.10864	-1680
0.234718	0.084629	-1680
0.27641	0.101491	-1680
0.138081	0.0849272	-1680
0.125348	0.0769826	-1680
0.289494	0.0969826	-1680
0.0734324	0.0600426	-1680
0.305423	0.0946681	-1680
0.117044	0.0657295	-1680
0.247936	0.0757472	-1680
0.266285	0.075946	-1680
0.127719	0.048044	-1680
0.278469	0.070252	-1680
0.114872	0.0434789	-1680
0.211298	0.0549521	-1680
0.169196	0.0486617	-1680
0.246659	0.0561093	-1680
0.296516	0.0507632	-1680
0.240995	0.0341072	-1680
0.253099	0.0216684	-1680
0.153245	0.00873979	-1680
0.292447	0.0237345	-1680
0.187986	0.00541001	-1680
0.279487	0.0193823	-1680
0.214731	-0.00164291	-1680
0.169271	-0.00995766	-1680
0.146838	-0.0131233	-1680
0.157588	-0.0126558	-1680
0.0879497	-0.0347283	-1680
0.239648	-0.0216851	-1680
0.221957	-0.0263133	-1680
0.101836	-0.042502	-1680
0.283141	-0.0188735	-1680
0.175016	-0.0363778	-1680
0.252296	-0.0299999	-1680
0.265563	-0.0337599	-1680
0.123499	-0.0523796	-1680
0.27412	-0.0435973	-1680
0.130979	-0.0642539	-1680
0.253562	-0.0522326	-1680
0.172138	-0.0639801	-1680
0.103383	-0.0756742	-1680
0.247774	-0.0638866	-1680
0.153956	-0.0743318	-1680
0.299954	-0.100472	-1680
0.32014	-0.157366	-1680
0.168382	-0.22572	-1680
0.20952	-0.285847	-1680
-0.290072	0.0432179	-1680
-0.17916	-0.0274839	-1680
-0.0688739	-0.0253165	-1680
-0.0377948	-0.0989189	-1680
-0.0453851	-0.107883	-1680
-0.104218	-0.170899	-1680
-0.0795629	-0.162191	-1680
-0.163277	-0.177844	-1680
-0.138245	-0.209419	-1680
-0.109762	-0.220435	-1680
-0.181184	-0.233459	-1680
-0.0496445	-0.226687	-1680
-0.134671	-0.244732	-1680
-0.0940309	-0.245072	-1680
-0.116985	-0.262161	-1680
-0.0897229	-0.375483	-1680
0.302635	0.235892	-1560
0.200586	0.18604	-1560
0.273457	0.193828	-1560
0.174341	0.173749	-1560
0.231162	0.169644	-1560
0.113845	0.139566	-1560
0.271843	0.178029	-1560
0.254395	0.165287	-1560
0.146675	0.12755	-1560
0.261697	0.145857	-1560
0.0673021	0.10679	-1560
0.252776	0.133168	-1560
0.225886	0.133038	-1560
0.135937	0.109863	-1560
0.0363012	0.0867481	-1560
0.10968	0.0986723	-1560
0.21513	0.118018	-1560
0.240472	0.118699	-1560
0.168754	0.0967232	-1560
0.210684	0.0941625	-1560
0.337616	0.126564	-1560
0.230684	0.0985118	-1560
0.13069	0.0663472	-1560
0.328282	0.103113	-1560
0.240526	0.0779808	-1560
0.145175	0.0507846	-1560
0.367272	0.0984736	-1560
0.290224	0.0727526	-1560
0.0377652	0.0152339	-1560
0.166872	0.0355966	-1560
0.303245	0.0701308	-1560
0.108748	0.026042	-1560
0.183992	0.041123	-1560
0.258393	0.0471309	-1560
0.271814	0.0510904	-1560
0.328611	0.0568537	-1560
0.245187	0.0304983	-1560
0.361996	0.0496151	-1560
0.232776	0.0149663	-1560
0.210015	0.00953167	-1560
0.353624	0.0358947	-1560
0.298434	0.0183143	-1560
0.27326	0.00250713	-1560
0.0546818	-0.0245718	-1560
0.157765	-0.00342723	-1560
0.134712	-0.0174118	-1560
0.203484	-0.0190808	-1560
0.269393	-0.0111609	-1560
0.339618	-0.00962606	-1560
0.246238	-0.0234095	-1560
0.120305	-0.0565792	-1560
0.349734	-0.0249816	-1560
0.320956	-0.0415142	-1560
0.157915	-0.0848017	-1560
0.353791	-0.0725084	-1560
0.372029	-0.0810839	-1560
0.344362	-0.109433	-1560
0.293164	-0.132142	-1560
0.273122	-0.15319	-1560
0.19173	-0.230139	-1560
0.206119	-0.243356	-1560
0.251975	-0.24653	-1560
0.21703	-0.257795	-1560
-0.158877	0.142767	-1560
-0.231058	0.0995313	-1560
-0.182558	0.0236426	-1560
-0.0692831	0.0122239	-1560
-0.0769073	-0.0138824	-1560
-0.0832815	-0.099824	-1560
-0.143317	-0.182682	-1560
-0.077865	-0.170392	-1560
-0.101851	-0.201568	-1560
-0.0860489	-0.245477	-1560
-0.134281	-0.271984	-1560
-0.0953894	-0.287655	-1560
-0.136271	-0.295072	-1560
0.221922	0.207692	-1440
0.149455	0.174766	-1440
0.165492	0.156668	-1440
0.359636	0.18568	-1440
0.161653	0.135244	-1440
0.076306	0.106212	-1440
0.252269	0.143474	-1440
0.197633	0.132798	-1440
0.136127	0.1147	-1440
0.22371	0.123894	-1440
0.247742	0.126889	-1440
0.167875	0.102458	-1440
0.145348	0.0973744	-1440
0.25566	0.101585	-1440
0.0900371	0.0770085	-1440
0.219997	0.106701	-1440
0.187272	0.0903016	-1440
0.139644	0.0755477	-1440
0.111495	0.0689838	-1440
0.299307	0.105472	-1440
0.204199	0.0829907	-1440
0.219484	0.0861504	-1440
0.0591395	0.0458482	-1440
0.230423	0.0812126	-1440
0.227571	0.0707421	-1440
0.0921093	0.0338573	-1440
0.204924	0.0600997	-1440
0.237949	0.063927	-1440
0.113916	0.0332426	-1440
0.31318	0.0748536	-1440
0.168841	0.0420275	-1440
0.0740484	0.0208287	-1440
0.303654	0.0636626	-1440
0.0573727	0.00889729	-1440
0.135816	0.0237834	-1440
0.178547	0.0255351	-1440
0.117308	0.0103449	-1440
0.141657	0.00865271	-1440
0.161953	0.01092	-1440
0.22665	0.0224746	-1440
0.247475	0.00957153	-1440
0.294661	0.0162148	-1440
0.27317	0.0115942	-1440
0.0824736	-0.0106012	-1440
0.164734	-0.0038901	-1440
0.173781	-0.00305927	-1440
0.110683	-0.0191929	-1440
0.162302	-0.0206227	-1440
0.20307	-0.00816663	-1440
0.0712619	-0.0378383	-1440
0.107542	-0.0367563	-1440
0.144863	-0.0336262	-1440
0.242742	-0.0108717	-1440
0.278176	-0.0129777	-1440
0.130074	-0.0562068	-1440
0.274365	-0.0322543	-1440
0.227473	-0.0472866	-1440
0.326786	-0.0263741	-1440
0.298958	-0.0397061	-1440
0.379981	-0.0550153	-1440
0.226742	-0.106488	-1440
0.208905	-0.134357	-1440
0.145523	-0.225194	-1440
-0.0856901	-0.0466139	-1440
-0.0172085	-0.111132	-1440
-0.0988732	-0.140259	-1440
-0.0799069	-0.134964	-1440
-0.0622915	-0.13849	-1440
-0.0716444	-0.148313	-1440
-0.0965784	-0.168485	-1440
-0.0715847	-0.163897	-1440
-0.128815	-0.188085	-1440
-0.144743	-0.197752	-1440
-0.122966	-0.213748	-1440
-0.185279	-0.22778	-1440
-0.0659643	-0.223615	-1440
-0.0907952	-0.232413	-1440
-0.116239	-0.264589	-1440
-0.0950647	-0.264188	-1440
0.222127	0.237947	-1320
0.0869229	0.198899	-1320
0.142933	0.180997	-1320
0.226488	0.187589	-1320
0.197084	0.175392	-1320
0.184702	0.171998	-1320
0.100478	0.131477	-1320
0.255327	0.168455	-1320
0.12387	0.125787	-1320
0.0704599	0.110555	-1320
0.202175	0.144104	-1320
0.222681	0.142336	-1320
0.119015	0.118407	-1320
0.286261	0.164533	-1320
0.181268	0.116428	-1320
0.195575	0.115083	-1320
0.0712115	0.0630977	-1320
0.204451	0.102308	-1320
0.222516	0.105801	-1320
0.263929	0.10859	-1320
0.215823	0.0976817	-1320
0.240164	0.0903931	-1320
0.220755	0.0852594	-1320
0.140388	0.0613794	-1320
0.163626	0.0641118	-1320
0.259233	0.0941818	-1320
0.0826933	0.0313446	-1320
0.279969	0.0848439	-1320
0.190523	0.0568231	-1320
0.1486	0.0418938	-1320
0.254871	0.0693652	-1320
0.23781	0.058295	-1320
0.15984	0.035922	-1320
0.205669	0.0488726	-1320
0.113041	0.015042	-1320
0.187363	0.0294432	-1320
0.15187	0.0127393	-1320
0.234119	0.0348446	-1320
0.214238	0.0104153	-1320
0.161179	0.00452106	-1320
0.243082	0.00389431	-1320
0.308353	0.00375347	-1320
0.325441	0.00370417	-1320
0.0681394	-0.0178635	-1320
0.110419	-0.0131778	-1320
0.136652	-9.39831e-05	-1320
0.197325	-0.00745823	-1320
0.138106	-0.0229386	-1320
0.122663	-0.0415539	-1320
0.191049	-0.0238247	-1320
0.137003	-0.0391842	-1320
0.113343	-0.055403	-1320
0.259348	-0.0173265	-1320
0.225928	-0.0295577	-1320
0.17005	-0.0511201	-1320
0.194379	-0.0471057	-1320
0.161552	-0.0678759	-1320
0.16977	-0.0731792	-1320
0.302423	-0.0547921	-1320
0.351587	-0.0446487	-1320
0.0617375	-0.206944	-1320
-0.280477	0.10864	-1320
-0.159916	-0.0777903	-1320
-0.0697981	-0.121966	-1320
-0.0431764	-0.134539	-1320
-0.0444606	-0.159547	-1320
-0.0654764	-0.167738	-1320
-0.048999	-0.179182	-1320
-0.233046	-0.233598	-1320
-0.119792	-0.221838	-1320
-0.0769409	-0.231744	-1320
-0.13036	-0.259778	-1320
-0.0694836	-0.258353	-1320
-0.0810048	-0.277957	-1320
0.211343	0.271652	-1200
0.293912	0.256279	-1200
0.145081	0.188604	-1200
0.16634	0.171419	-1200
0.196304	0.181907	-1200
0.226416	0.181054	-1200
0.324108	0.194391	-1200
0.23502	0.182859	-1200
0.216824	0.1728	-1200
0.28758	0.178341	-1200
0.213164	0.167105	-1200
0.123761	0.134688	-1200
0.2393	0.142237	-1200
0.289497	0.135125	-1200
0.249044	0.126582	-1200
0.218352	0.120978	-1200
0.329708	0.140228	-1200
0.300814	0.126434	-1200
0.0909655	0.0873482	-1200
0.205185	0.0957926	-1200
0.267331	0.103144	-1200
0.234857	0.0923458	-1200
0.280588	0.0946507	-1200
0.114942	0.0743362	-1200
0.258534	0.07908	-1200
0.296698	0.0751397	-1200
0.0798288	0.0487703	-1200
0.288493	0.0722779	-1200
0.258602	0.058406	-1200
0.0828061	0.0308242	-1200
0.190592	0.0357865	-1200
0.121432	0.0289492	-1200
0.286238	0.0423701	-1200
0.256121	0.0286602	-1200
0.2227	0.0216749	-1200
0.315047	0.032093	-1200
0.20518	0.0164377	-1200
0.301209	0.00957926	-1200
0.322964	0.0105026	-1200
0.0708405	-0.0174627	-1200
0.168443	-0.0113441	-1200
0.208366	-0.00809481	-1200
0.0900464	-0.0323666	-1200
0.198836	-0.0235307	-1200
0.280452	-0.0134723	-1200
0.158383	-0.0339501	-1200
0.233797	-0.0307831	-1200
0.375326	-0.0189322	-1200
0.251559	-0.0446354	-1200
0.155586	-0.0605337	-1200
0.187998	-0.0604704	-1200
0.258613	-0.0699333	-1200
0.21132	-0.0761406	-1200
0.298694	-0.07685	-1200
0.269355	-0.0787755	-1200
0.371362	-0.0717195	-1200
0.0708292	-0.16042	-1200
-0.288707	0.11491	-1200
-0.0813864	-0.127969	-1200
-0.0890851	-0.143121	-1200
-0.0740631	-0.143605	-1200
-0.113371	-0.162464	-1200
-0.12911	-0.164538	-1200
-0.0784161	-0.171332	-1200
-0.11625	-0.182311	-1200
-0.202001	-0.198895	-1200
-0.141332	-0.193836	-1200
-0.154471	-0.195118	-1200
-0.128404	-0.191109	-1200
-0.0834405	-0.198147	-1200
-0.158511	-0.207863	-1200
-0.101848	-0.223895	-1200
-0.167535	-0.241541	-1200
-0.147938	-0.245035	-1200
-0.136592	-0.288699	-1200
0.106411	0.324573	-1080
0.227082	0.253619	-1080
0.101061	0.222702	-1080
0.287502	0.246005	-1080
0.200213	0.201194	-1080
0.166885	0.18426	-1080
0.23658	0.194735	-1080
0.243599	0.178372	-1080
0.184397	0.170882	-1080
0.196929	0.158952	-1080
0.0996091	0.137417	-1080
0.083592	0.119822	-1080
0.234672	0.154957	-1080
0.284854	0.164068	-1080
0.290808	0.155277	-1080
0.229545	0.143807	-1080
0.265129	0.149514	-1080
0.117975	0.111393	-1080
0.243425	0.135949	-1080
0.265004	0.135691	-1080
0.237178	0.128083	-1080
0.143082	0.111462	-1080
0.301491	0.144419	-1080
0.272556	0.133095	-1080
0.178955	0.102936	-1080
0.124695	0.0895025	-1080
0.235493	0.111942	-1080
0.245274	0.110056	-1080
0.149726	0.0931358	-1080
0.191525	0.0996576	-1080
0.267495	0.109325	-1080
0.0905349	0.0710855	-1080
0.228083	0.0924815	-1080
0.213854	0.0878529	-1080
0.158425	0.0730205	-1080
0.0910949	0.0572137	-1080
0.134987	0.0649465	-1080
0.14716	0.0634988	-1080
0.305612	0.0942703	-1080
0.19881	0.0651623	-1080
0.257844	0.0768278	-1080
0.155984	0.0557033	-1080
0.220645	0.0672504	-1080
0.0833746	0.0258088	-1080
0.259377	0.0579584	-1080
0.253125	0.0546731	-1080
0.160448	0.0321218	-1080
0.136553	0.0214934	-1080
0.341458	0.0709185	-1080
0.239185	0.0208322	-1080
0.294032	0.0373559	-1080
0.249955	0.0192522	-1080
0.205269	0.00556128	-1080
0.174078	0.000765633	-1080
0.32524	0.0211871	-1080
0.0641443	-0.0128572	-1080
0.120302	-0.00512566	-1080
0.0615509	-0.0348028	-1080
0.168065	-0.0094473	-1080
0.150014	-0.0306104	-1080
0.106258	-0.0443363	-1080
0.168935	-0.0277102	-1080
0.206036	-0.022685	-1080
0.241892	-0.0167697	-1080
0.29083	-0.00903811	-1080
0.208934	-0.0393973	-1080
0.3207	-0.018349	-1080
0.233367	-0.061429	-1080
0.320983	-0.0629366	-1080
0.178384	-0.251603	-1080
-0.170547	0.170955	-1080
-0.299035	0.0746857	-1080
-0.0222517	0.0311509	-1080
-0.13668	-0.109717	-1080
-0.000802865	-0.0917105	-1080
-0.064276	-0.148797	-1080
-0.110971	-0.167985	-1080
-0.155721	-0.179921	-1080
-0.090794	-0.168831	-1080
-0.0945798	-0.182995	-1080
-0.0402839	-0.185888	-1080
-0.0774149	-0.190739	-1080
-0.131822	-0.228275	-1080
-0.108563	-0.2337	-1080
-0.0612111	-0.233145	-1080
-0.159823	-0.271592	-1080
-0.218696	-0.300649	-1080
-0.121192	-0.304473	-1080
0.144597	0.407655	-960
0.293996	0.221903	-960
0.226876	0.218611	-960
0.148728	0.203368	-960
0.224499	0.197827	-960
0.357858	0.199746	-960
0.203208	0.18479	-960
0.109031	0.17163	-960
0.176408	0.167354	-960
0.26637	0.167268	-960
0.211656	0.165766	-960
0.0928354	0.158277	-960
0.0783099	0.124039	-960
0.300414	0.125246	-960
0.235654	0.130399	-960
0.267561	0.113151	-960
0.334896	0.114725	-960
0.326077	0.103247	-960
0.290996	0.100437	-960
0.281751	0.0892901	-960
0.340578	0.0947377	-960
0.315048	0.0949749	-960
0.357199	0.087594	-960
0.255904	0.0812911	-960
0.314904	0.0846833	-960
0.276255	0.0807377	-960
0.189461	0.0733567	-960
0.347284	0.081751	-960
0.0760526	0.0677509	-960
0.312904	0.0688649	-960
0.243635	0.0579696	-960
0.137598	0.0556482	-960
0.294002	0.0574665	-960
0.156165	0.0508114	-960
0.126527	0.0504017	-960
0.283494	0.0432292	-960
0.187365	0.0395208	-960
0.0766992	0.0264262	-960
0.130526	0.0191243	-960
0.251796	0.0230628	-960
0.262939	0.0185278	-960
0.255898	0.0117506	-960
0.220823	0.0067485	-960
0.198622	0.00558422	-960
0.377563	0.00344253	-960
0.143693	-5.7432e-05	-960
0.157302	-0.00844889	-960
0.231744	-0.0139305	-960
0.159769	-0.0278035	-960
0.211722	-0.0413	-960
0.0359786	-0.0446502	-960
0.0916319	-0.042053	-960
0.165888	-0.0507125	-960
0.195903	-0.0508018	-960
0.11924	-0.0537691	-960
0.193616	-0.0746808	-960
0.156662	-0.0801368	-960
0.252018	-0.0793136	-960
0.438341	-0.197821	-960
0.157296	-0.263766	-960
0.122809	-0.295494	-960
0.221619	-0.477586	-960
-0.261689	0.143184	-960
-0.153962	-0.0542657	-960
-0.0285824	-0.0506016	-960
-0.0465982	-0.120969	-960
-0.0379346	-0.137503	-960
-0.0454942	-0.14996	-960
-0.100903	-0.171822	-960
-0.107511	-0.214315	-960
-0.0846117	-0.212515	-960
-0.109682	-0.254408	-960
-0.138223	-0.273657	-960
0.195353	0.296397	-840
0.154009	0.22302	-840
0.217235	0.224858	-840
0.181974	0.205604	-840
0.1408	0.199662	-840
0.230211	0.191268	-840
0.194565	0.190066	-840
0.143249	0.180586	-840
0.120534	0.169159	-840
0.411227	0.169788	-840
0.155211	0.163954	-840
0.251815	0.167267	-840
0.205863	0.14688	-840
0.118289	0.137548	-840
0.27668	0.137711	-840
0.240427	0.144025	-840
0.117603	0.126617	-840
0.153805	0.123289	-840
0.134355	0.101716	-840
0.265279	0.119473	-840
0.158567	0.104284	-840
0.113056	0.097108	-840
0.148141	0.0908089	-840
0.316334	0.105409	-840
0.2202	0.091864	-840
0.14063	0.0781643	-840
0.129235	0.0751078	-840
0.306929	0.0956962	-840
0.217116	0.077311	-840
0.249854	0.0761628	-840
0.214871	0.0614857	-840
0.344855	0.0781798	-840
0.259009	0.0637121	-840
0.19728	0.0473981	-840
0.120936	0.0418748	-840
0.103793	0.0367704	-840
0.213318	0.0471421	-840
0.252082	0.0470956	-840
0.230812	0.0279424	-840
0.24766	0.0237379	-840
0.173295	0.000589568	-840
0.274457	0.00989077	-840
0.302677	0.0136066	-840
0.0407939	-0.00680038	-840
0.148039	-0.000512408	-840
0.076429	-0.0143108	-840
0.109575	-0.0134544	-840
0.0563665	-0.0208843	-840
0.128	-0.0193397	-840
0.209083	-0.0211405	-840
0.043549	-0.0344924	-840
0.279134	-0.0105995	-840
0.07648	-0.0348437	-840
0.0925459	-0.0365273	-840
0.155681	-0.0295293	-840
0.334911	-0.0146256	-840
0.324237	-0.0250421	-840
0.303284	-0.029727	-840
0.15868	-0.056094	-840
0.282813	-0.0355098	-840
0.0978634	-0.0624112	-840
0.22787	-0.0463948	-840
0.265806	-0.0583779	-840
0.00321997	-0.0977747	-840
0.356963	-0.0508748	-840
0.254219	-0.0733987	-840
0.192439	-0.0939609	-840
0.232785	-0.0953151	-840
0.214791	-0.130847	-840
0.266266	-0.249777	-840
0.225784	-0.322985	-840
-0.0516045	-0.0720722	-840
-0.182643	-0.150915	-840
-0.140986	-0.14524	-840
-0.24649	-0.165045	-840
-0.165375	-0.173112	-840
-0.0479533	-0.165447	-840
-0.0520925	-0.206457	-840
-0.0867666	-0.225498	-840
-0.106125	-0.243346	-840
0.079381	0.300477	-720
0.0894037	0.291316	-720
0.0857303	0.169176	-720
0.128598	0.165345	-720
0.0477494	0.144086	-720
0.0203668	0.147491	-720
0.0523532	0.128371	-720
0.0466033	0.123708	-720
0.106725	0.12562	-720
0.170856	0.128426	-720
0.0755397	0.114375	-720
0.189228	0.126019	-720
0.218817	0.127023	-720
0.0500082	0.111473	-720
0.224974	0.125517	-720
0.306931	0.13333	-720
0.124656	0.11128	-720
0.0983427	0.105709	-720
0.248578	0.110503	-720
0.225219	0.104526	-720
0.0384892	0.084134	-720
0.239342	0.0980337	-720
0.0440425	0.0787282	-720
0.231242	0.0861354	-720
0.0511543	0.06064	-720
0.197453	0.0677377	-720
0.158632	0.0677171	-720
0.273798	0.0768781	-720
0.224375	0.0750349	-720
0.299071	0.0711284	-720
0.257623	0.0643952	-720
0.188845	0.0583291	-720
0.173201	0.0529165	-720
0.240239	0.0589275	-720
0.193324	0.0483703	-720
0.08562	0.0380402	-720
0.124344	0.0403785	-720
0.0506939	0.0303854	-720
0.151885	0.0412314	-720
0.205346	0.0426413	-720
0.0861379	0.0249864	-720
0.107939	0.0197663	-720
0.183848	0.0251652	-720
0.130391	0.0193399	-720
0.299344	0.0327169	-720
0.319653	0.0250002	-720
0.218155	0.0128474	-720
0.184648	0.00646497	-720
0.249278	0.00226274	-720
0.229118	0.000639619	-720
0.0325235	-0.00475983	-720
0.039832	-0.0149522	-720
0.128334	-0.0097797	-720
0.169576	-0.00617874	-720
0.209029	-0.00399102	-720
0.105963	-0.01489	-720
0.199064	-0.0104411	-720
0.189147	-0.0207861	-720
0.121074	-0.0240253	-720
0.232259	-0.0135107	-720
0.214832	-0.0190619	-720
0.158978	-0.022499	-720
0.111459	-0.0414252	-720
0.158743	-0.0348056	-720
0.145991	-0.037666	-720
0.203783	-0.0345964	-720
0.165169	-0.0395767	-720
0.0980981	-0.053811	-720
0.15307	-0.052279	-720
0.181718	-0.0541162	-720
0.133696	-0.0637263	-720
0.0653108	-0.0736756	-720
0.08738	-0.0730425	-720
0.186883	-0.0689554	-720
0.232638	-0.0673443	-720
0.180155	-0.0790686	-720
0.151832	-0.0864684	-720
0.169523	-0.0912904	-720
0.175158	-0.124881	-720
0.266096	-0.163886	-720
0.340663	-0.194808	-720
0.132506	-0.263396	-720
0.170353	-0.28005	-720
0.222836	-0.367146	-720
0.210592	-0.37601	-720
-0.0120713	0.228909	-720
-0.279696	0.20215	-720
-0.0959696	0.151859	-720
-0.159882	0.130196	-720
-0.159593	-0.0197645	-720
-0.197334	-0.024515	-720
-0.139257	-0.096911	-720
-0.0317172	-0.103943	-720
-0.0788438	-0.113345	-720
-0.152624	-0.139997	-720
-0.0456751	-0.167423	-720
-0.122888	-0.182233	-720
-0.0960595	-0.193955	-720
-0.114131	-0.203202	-720
-0.123956	-0.233235	-720
-0.131209	-0.24188	-720
-0.1753	-0.253138	-720
0.0625203	0.3555	-600
0.244832	0.218841	-600
0.162423	0.189446	-600
0.26751	0.152558	-600
0.0998865	0.127025	-600
0.220656	0.140452	-600
0.247675	0.129385	-600
0.0677803	0.109062	-600
0.323203	0.142923	-600
0.156379	0.116794	-600
0.339307	0.128296	-600
0.0860201	0.0908606	-600
0.289237	0.116049	-600
0.1506	0.0908325	-600
0.291453	0.100565	-600
0.303541	0.101759	-600
0.257877	0.0909519	-600
0.118618	0.0691198	-600
0.314461	0.0864155	-600
0.270851	0.0667392	-600
0.284917	0.0781223	-600
0.23355	0.0698992	-600
0.205628	0.0577508	-600
0.162737	0.0482076	-600
0.109882	0.0425126	-600
0.225711	0.0523788	-600
0.257682	0.0518591	-600
0.0187155	0.0141849	-600
0.0366959	0.00958534	-600
0.165434	0.0262772	-600
0.222797	0.0303009	-600
0.199578	0.0239037	-600
0.179571	0.014859	-600
0.231679	0.0169938	-600
0.251627	0.0133773	-600
0.24407	0.00959938	-600
0.317272	0.0140936	-600
0.330101	0.0119448	-600
0.0551033	-0.00142854	-600
0.255244	-0.00581882	-600
0.176522	-0.00935322	-600
0.11644	-0.0141745	-600
0.0692994	-0.026508	-600
0.215299	-0.00870052	-600
0.0454914	-0.0275671	-600
0.184274	-0.0208616	-600
0.199432	-0.0222839	-600
0.214672	-0.0233553	-600
0.115829	-0.0395618	-600
0.174246	-0.0387183	-600
0.247616	-0.0347344	-600
0.165331	-0.046723	-600
0.10606	-0.0565873	-600
0.211855	-0.0756324	-600
0.197913	-0.100749	-600
0.155163	-0.102584	-600
0.184106	-0.099819	-600
0.372765	-0.114234	-600
0.143918	-0.150784	-600
0.343464	-0.146068	-600
0.177306	-0.181849	-600
0.198578	-0.183308	-600
0.253184	-0.350053	-600
0.221678	-0.379966	-600
-0.00158258	-0.0892219	-600
-0.146795	-0.107727	-600
-0.182696	-0.146672	-600
-0.0597315	-0.141253	-600
-0.121918	-0.177284	-600
-0.114195	-0.259717	-600
0.218364	0.161701	-480
0.0222341	0.134611	-480
0.0997368	0.139939	-480
0.256615	0.14614	-480
0.141231	0.113652	-480
0.258471	0.102144	-480
0.104146	0.0885354	-480
0.168701	0.0729468	-480
0.228158	0.0851668	-480
0.0777981	0.0698178	-480
0.287587	0.0710863	-480
0.223295	0.0530945	-480
0.246658	0.0551523	-480
0.257411	0.0520444	-480
0.308012	0.0527421	-480
0.273396	0.0497188	-480
0.298161	0.0447786	-480
0.109361	0.0329392	-480
0.267958	0.0359413	-480
0.0871906	0.023242	-480
0.307105	0.0337989	-480
0.27868	0.0303387	-480
0.245113	0.0190278	-480
0.29477	0.025166	-480
0.0840897	0.00854839	-480
0.212806	0.0121989	-480
0.264451	0.0139466	-480
0.279497	0.0130587	-480
0.187112	0.00353775	-480
0.231164	0.00257932	-480
0.12523	-0.00365088	-480
0.196832	-0.000405011	-480
0.234233	-0.0109006	-480
0.0537604	-0.0245379	-480
0.303667	-0.0115254	-480
0.0939727	-0.0277548	-480
0.233389	-0.0259207	-480
0.175188	-0.0376139	-480
0.157257	-0.0371221	-480
0.144089	-0.0388174	-480
0.200729	-0.04226	-480
0.190503	-0.048555	-480
0.177561	-0.0532647	-480
0.217663	-0.0538548	-480
0.148529	-0.0768884	-480
0.18756	-0.0869211	-480
0.164799	-0.086545	-480
0.207859	-0.0820841	-480
0.0553795	-0.0875806	-480
0.0790216	-0.0947435	-480
0.139216	-0.0921225	-480
0.201641	-0.0930136	-480
0.214699	-0.0922845	-480
0.156018	-0.12023	-480
0.101762	-0.141083	-480
0.145239	-0.181074	-480
0.362263	-0.185061	-480
0.33514	-0.206833	-480
0.228395	-0.21178	-480
0.19016	-0.312095	-480
0.274234	-0.354743	-480
-0.195372	0.135903	-480
-0.295799	0.0261477	-480
-0.141422	-0.077497	-480
-0.0786827	-0.0957133	-480
-0.1387	-0.204234	-480
-0.101013	-0.224763	-480
-0.0777509	-0.23946	-480
-0.113552	-0.254152	-480
-0.0957511	-0.271609	-480
-0.15457	-0.285579	-480
-0.0730917	-0.28364	-480
-0.0682621	-0.312786	-480
-0.0951545	-0.35924	-480
-0.103518	-0.380652	-480
0.126166	0.356637	-360
0.251579	0.204411	-360
0.0450991	0.186946	-360
0.0405643	0.172063	-360
0.209556	0.182016	-360
0.0991094	0.171396	-360
0.107896	0.150785	-360
[truncated: 1,091 more rows]
