# Supplementary material for: Spinal premotor interneurons controlling antagonistic muscles are spatially intermingled
Source: eLife. 2022 Dec 13;11:e81976. doi: 10.7554/eLife.81976 (PMC9844990; doi:10.7554/eLife.81976)
Supplement: Figure 12—figure supplement 16—source data 1. — The x-y coordinates are normalized (between –0.5 and 0.5) and scaled to an idealized spinal cord of dimensions 1700 μm and 900 μm in the mediolateral and dorsoventral directions respectively, while z coordinates are in micron, with the axis origin taken at the border between L4 and L5 and negative values in the rostral direction. [file elife-81976-fig12-figsupp16-data1.xlsx]

## Sheet: Sheet1
0.129448	0.245806	-2160
0.241243	0.175338	-2160
0.373317	0.176321	-2160
0.0739694	0.117078	-2160
0.237218	0.132893	-2160
0.183392	0.114323	-2160
0.319403	0.134553	-2160
0.393449	0.137025	-2160
0.319485	0.119251	-2160
0.01096	0.0461763	-2160
0.319084	0.0818515	-2160
0.285366	0.0797575	-2160
0.245941	0.0593931	-2160
0.352106	0.0688944	-2160
0.400248	0.0672807	-2160
0.031304	0.0026292	-2160
0.409178	0.0627307	-2160
0.157895	0.0167355	-2160
0.313666	0.0295667	-2160
0.181326	-0.0054971	-2160
0.338295	-0.0185577	-2160
0.231823	-0.0534262	-2160
0.166607	-0.0780026	-2160
0.201157	-0.107825	-2160
0.280763	-0.114546	-2160
-0.136925	-0.115678	-2160
0.106838	0.183288	-1920
0.186163	0.206774	-1920
0.186748	0.191025	-1920
0.163121	0.124237	-1920
0.227381	0.137738	-1920
0.327809	0.166164	-1920
0.0769899	0.0883775	-1920
0.00047302	0.0668544	-1920
0.0128484	0.053182	-1920
0.326153	0.134629	-1920
0.203552	0.0904161	-1920
0.0562598	0.0469147	-1920
0.318538	0.105444	-1920
0.30521	0.103501	-1920
0.344406	0.102989	-1920
0.0756714	0.0312701	-1920
0.0276244	0.0168582	-1920
0.345311	0.0832764	-1920
0.327371	0.0734725	-1920
0.266689	0.0340103	-1920
0.350526	0.0502427	-1920
0.18064	-0.00183116	-1920
0.196221	-0.0309438	-1920
0.345175	-0.0365768	-1920
-0.149859	-0.117868	-1920
-0.243466	-0.184211	-1920
0.190564	0.198451	-1680
0.00182339	0.0764234	-1680
0.295371	0.0690557	-1680
0.0669815	0.0410645	-1680
0.282695	-0.0452533	-1680
0.317962	-0.0461769	-1680
0.134667	-0.0746568	-1680
0.233923	-0.122556	-1680
-0.123397	-0.0679994	-1680
-0.0245189	-0.0592123	-1680
-0.0958704	-0.138655	-1680
-0.18662	-0.186091	-1680
0.192308	0.182098	-1440
0.2089	0.147088	-1440
0.240922	0.136895	-1440
0.135131	0.0731646	-1440
0.256236	0.0757877	-1440
0.0597662	0.0221469	-1440
0.269371	0.0581682	-1440
0.312539	0.0156206	-1440
0.167107	-0.0362412	-1440
0.282176	-0.0790868	-1440
0.232392	-0.140342	-1440
0.394627	-0.106522	-1440
0.380539	-0.114547	-1440
-0.0580715	0.0336492	-1440
-0.0852494	-0.113352	-1440
-0.13884	-0.140831	-1440
0.121985	0.30662	-1200
0.168055	0.240081	-1200
0.0705025	0.196506	-1200
0.102732	0.190753	-1200
0.200761	0.213573	-1200
0.209655	0.180399	-1200
0.213898	0.151096	-1200
0.0352457	0.0219172	-1200
0.077423	0.0247409	-1200
0.136524	-0.0247996	-1200
0.265729	-0.0343701	-1200
0.176644	-0.0960081	-1200
0.233217	-0.116753	-1200
0.0793916	-0.198816	-1200
0.0141903	-0.235898	-1200
0.349047	-0.310431	-1200
-0.0532607	0.0990436	-1200
-0.0763768	0.0425848	-1200
-0.0583378	0.00185231	-1200
-0.0743154	-0.0610744	-1200
-0.163556	-0.210269	-1200
0.172606	0.279704	-960
0.136421	0.160576	-960
0.0433055	0.134595	-960
0.0518239	0.0306724	-960
0.0364653	0.00223989	-960
0.161201	-0.0534686	-960
0.223338	-0.121587	-960
0.348501	-0.116602	-960
-0.141502	-0.139634	-960
-0.161411	-0.156364	-960
0.0657397	0.272185	-720
0.0863826	0.250348	-720
0.153711	0.242183	-720
0.207982	0.221152	-720
0.100596	0.19827	-720
0.186785	0.217061	-720
0.182953	0.191159	-720
0.203403	0.191407	-720
0.250805	0.135132	-720
0.106905	0.0943707	-720
0.0563147	0.0146909	-720
0.312347	0.0439842	-720
0.176137	-0.0580582	-720
0.215494	-0.0564608	-720
0.266367	-0.0611048	-720
0.215029	-0.0987921	-720
0.161406	-0.126738	-720
0.316111	-0.0819452	-720
0.263748	-0.105239	-720
0.292206	-0.0988168	-720
0.198808	-0.285137	-720
-0.101488	-0.172293	-720
0.0736798	0.208643	-480
0.136074	0.171963	-480
0.172967	0.164772	-480
0.210959	0.172441	-480
0.311225	0.19128	-480
0.223528	0.16126	-480
0.231872	0.156709	-480
0.149522	0.141974	-480
0.318596	0.141111	-480
0.0808571	0.0730808	-480
0.223229	0.0942163	-480
0.254565	0.100118	-480
0.122726	0.0415333	-480
0.315206	0.078692	-480
0.333707	0.0558523	-480
0.225878	0.0123862	-480
0.0279513	-0.00599412	-480
0.1258	-0.0221775	-480
0.254592	-0.00887252	-480
0.282394	-0.0371513	-480
0.236743	-0.0597728	-480
0.238678	-0.0764384	-480
0.243649	-0.109923	-480
0.221769	-0.105023	-480
0.102234	-0.150634	-480
0.259917	-0.133409	-480
0.228786	-0.179571	-480
0.246105	-0.232776	-480
0.295051	-0.215474	-480
0.178236	-0.259439	-480
0.3695	-0.266643	-480
0.248786	-0.338863	-480
-0.139728	-0.0917248	-480
-0.0968821	-0.166174	-480
0.148693	0.221766	-240
0.247161	0.214798	-240
0.128169	0.148833	-240
0.191525	0.125647	-240
0.213545	0.11833	-240
0.180402	0.109888	-240
0.0846933	0.0794142	-240
0.0991908	0.0619624	-240
0.0214611	0.0112596	-240
0.0314722	0.0215335	-240
0.280428	0.0464818	-240
0.0992867	0.0100848	-240
0.273718	0.024102	-240
0.195001	-0.0394778	-240
0.333689	-0.0401698	-240
0.186723	-0.0705587	-240
0.282223	-0.0708626	-240
0.287161	-0.0864663	-240
0.340828	-0.0869473	-240
0.299598	-0.0960193	-240
0.275603	-0.11521	-240
0.327041	-0.0980109	-240
0.311889	-0.118045	-240
0.352994	-0.130788	-240
0.32418	-0.142637	-240
0.302307	-0.152924	-240
0.375657	-0.14424	-240
0.244825	-0.170713	-240
0.368208	-0.157844	-240
0.327921	-0.158814	-240
0.328717	-0.176519	-240
0.30698	-0.173878	-240
0.303165	-0.195473	-240
0.401944	-0.185566	-240
0.321635	-0.216605	-240
0.337442	-0.218529	-240
0.352814	-0.237879	-240
0.377192	-0.301079	-240
0.374416	-0.352684	-240
-0.200547	-0.0894808	-240
-0.0875187	-0.141007	-240
0.144527	0.223907	0
0.03564	0.198706	0
0.261219	0.233989	0
0.261979	0.199549	0
0.24478	0.136245	0
0.183157	0.101988	0
0.0988004	0.0721175	0
0.133806	0.0675283	0
0.228449	0.062797	0
0.282552	0.0595074	0
0.124777	0.0198798	0
0.140764	0.00937132	0
0.258205	0.0208646	0
0.272071	0.0118588	0
0.0348452	-0.00124415	0
0.00200128	-0.0207636	0
0.21356	-0.0156657	0
0.303514	-0.0213326	0
0.289643	-0.0261954	0
0.172064	-0.0814387	0
0.199316	-0.0823794	0
0.259395	-0.0814311	0
0.290414	-0.0786393	0
0.363484	-0.0814159	0
0.266273	-0.107088	0
0.239033	-0.124089	0
0.321366	-0.125743	0
0.316179	-0.13018	0
0.136007	-0.158978	0
0.274724	-0.152029	0
0.264203	-0.167907	0
0.271357	-0.176214	0
0.18099	-0.217787	0
0.36457	-0.17343	0
0.361649	-0.187867	0
0.288608	-0.21278	0
0.240137	-0.218674	0
0.216859	-0.230941	0
0.14085	-0.264382	0
0.254723	-0.250719	0
0.317918	-0.260596	0
0.432219	-0.240652	0
0.264341	-0.300105	0
0.430476	-0.323934	0
0.270933	-0.350858	0
0.303846	-0.348127	0
0.387322	-0.334851	0
0.326043	-0.348885	0
0.322921	-0.367274	0
-0.28084	0.247108	0
-0.051728	-0.00575545	0
-0.0029196	-0.0518403	0
-0.149796	-0.157159	0
-0.168204	-0.177176	0
-0.118434	-0.213141	0
0.0790992	0.185257	240
0.192158	0.216108	240
0.180927	0.220957	240
0.120571	0.171781	240
0.230464	0.206976	240
0.235269	0.146975	240
0.0669014	0.0896057	240
0.182865	0.0946223	240
0.202784	0.110078	240
0.0861534	0.0726958	240
0.213569	0.103715	240
0.0426358	0.0436353	240
0.0593273	0.0280611	240
0.0321168	0.0194627	240
0.167774	0.0513135	240
0.233855	0.0547074	240
0.206899	0.0200465	240
0.226796	0.0145748	240
0.275496	-0.00197467	240
0.21691	-0.0389771	240
0.234963	-0.0328974	240
0.247008	-0.05738	240
0.258986	-0.0650329	240
0.305296	-0.0929158	240
0.334892	-0.0673107	240
0.328985	-0.0769956	240
0.34857	-0.0844108	240
0.198268	-0.132581	240
0.157096	-0.148518	240
0.240751	-0.123961	240
0.213795	-0.131639	240
0.258658	-0.145396	240
0.275745	-0.144339	240
0.241266	-0.175131	240
0.271839	-0.171124	240
0.337367	-0.144339	240
0.206046	-0.192034	240
0.282031	-0.203333	240
0.196335	-0.233732	240
0.254227	-0.221679	240
0.242153	-0.229831	240
0.285976	-0.22757	240
0.276429	-0.247587	240
0.191423	-0.274708	240
0.320789	-0.232511	240
0.34627	-0.232937	240
0.334191	-0.245481	240
0.210172	-0.295749	240
0.288406	-0.288612	240
0.362272	-0.263499	240
0.274762	-0.295266	240
0.332122	-0.283016	240
0.354754	-0.283991	240
0.38054	-0.317216	240
0.266193	-0.376792	240
0.35957	-0.37358	240
-0.106273	-0.100459	240
-0.0918805	-0.119452	240
-0.0984039	-0.139869	240
0.222793	0.243204	480
0.241778	0.239778	480
0.163008	0.218154	480
0.252075	0.222549	480
0.0728255	0.175022	480
0.220945	0.193416	480
0.18015	0.182827	480
0.112446	0.170517	480
0.232405	0.14421	480
0.249231	0.176035	480
0.247216	0.165556	480
0.206707	0.15139	480
0.227891	0.13341	480
0.121318	0.113962	480
0.176185	0.0842038	480
0.132474	0.0961762	480
0.158506	0.0886333	480
0.159359	0.0442703	480
0.308808	0.065954	480
0.267416	0.0395707	480
0.221118	0.0234809	480
0.292369	-0.0287854	480
0.317716	-0.0654641	480
0.269927	-0.0722226	480
0.286293	-0.0717046	480
0.277964	-0.0775998	480
0.373322	-0.0881734	480
0.337302	-0.165379	480
0.237604	-0.181995	480
0.267571	-0.222966	480
0.355416	-0.218773	480
0.314031	-0.229634	480
0.367902	-0.252828	480
0.29321	-0.271772	480
0.294456	-0.285782	480
0.337714	-0.317618	480
0.437138	-0.334457	480
0.373268	-0.380542	480
-0.0891111	0.116705	480
-0.112935	0.061076	480
-0.0173541	-0.00906973	480
-0.00477667	-0.0258499	480
-0.170059	-0.11802	480
0.183014	0.28639	720
0.194471	0.245065	720
0.181743	0.236004	720
0.0698948	0.218034	720
0.280183	0.200134	720
0.0859967	0.188791	720
0.130313	0.179017	720
0.256364	0.184808	720
0.208558	0.15404	720
0.229015	0.158887	720
0.246742	0.116451	720
0.333337	0.0734947	720
0.26364	0.0369545	720
0.173149	0.0184376	720
0.317113	0.0094303	720
0.245993	0.00913946	720
0.20411	-0.010803	720
0.223916	-0.0109061	720
0.229781	-0.101403	720
0.300442	-0.105675	720
0.224155	-0.275497	720
0.22074	-0.306359	720
-0.102367	0.0563414	720
-0.140118	-0.11075	720
-0.161921	-0.204285	720
0.0751692	0.209725	960
0.289084	0.188308	960
0.265603	0.179479	960
0.163054	0.109816	960
0.091096	0.109071	960
0.24327	-0.0338832	960
0.349252	-0.0819126	960
0.289387	-0.328204	960
0.472808	-0.349357	960
-0.170228	-0.103788	960
0.256888	0.195332	1200
0.097607	0.149286	1200
0.0449986	0.139722	1200
0.114545	0.107632	1200
0.154915	0.00252366	1200
0.338501	-0.059912	1200
0.263354	-0.231923	1200
0.391649	-0.228118	1200
0.381583	-0.304115	1200
-0.0878124	0.113221	1200
-0.231185	-0.269039	1200
-0.119114	-0.259443	1200
0.241243	0.175338	-2160
0.373317	0.176321	-2160
0.0739694	0.117078	-2160
0.319485	0.119251	-2160
0.285366	0.0797575	-2160
0.352106	0.0688944	-2160
0.157895	0.0167355	-2160
0.338295	-0.0185577	-2160
-0.136925	-0.115678	-2160
0.106838	0.183288	-1920
0.227381	0.137738	-1920
0.0769899	0.0883775	-1920
0.326153	0.134629	-1920
0.203552	0.0904161	-1920
0.0562598	0.0469147	-1920
0.0756714	0.0312701	-1920
0.0276244	0.0168582	-1920
0.266689	0.0340103	-1920
0.190564	0.198451	-1680
0.295371	0.0690557	-1680
-0.0245189	-0.0592123	-1680
0.0597662	0.0221469	-1440
-0.0580715	0.0336492	-1440
0.0705025	0.196506	-1200
0.102732	0.190753	-1200
0.176644	-0.0960081	-1200
0.349047	-0.310431	-1200
0.0518239	0.0306724	-960
0.0364653	0.00223989	-960
-0.161411	-0.156364	-960
0.207982	0.221152	-720
0.203403	0.191407	-720
0.333707	0.0558523	-480
0.0279513	-0.00599412	-480
0.213545	0.11833	-240
0.0314722	0.0215335	-240
0.340828	-0.0869473	-240
0.375657	-0.14424	-240
0.374416	-0.352684	-240
0.183157	0.101988	0
0.228449	0.062797	0
0.303514	-0.0213326	0
0.172064	-0.0814387	0
-0.0029196	-0.0518403	0
0.202784	0.110078	240
0.0426358	0.0436353	240
0.0593273	0.0280611	240
0.0321168	0.0194627	240
0.226796	0.0145748	240
0.275496	-0.00197467	240
0.234963	-0.0328974	240
0.247008	-0.05738	240
0.258986	-0.0650329	240
0.252075	0.222549	480
0.176185	0.0842038	480
0.267416	0.0395707	480
0.286293	-0.0717046	480
0.277964	-0.0775998	480
-0.0891111	0.116705	480
-0.112935	0.061076	480
0.183014	0.28639	720
0.130313	0.179017	720
0.229015	0.158887	720
-0.102367	0.0563414	720
-0.140118	-0.11075	720
0.0751692	0.209725	960
0.091096	0.109071	960
0.289387	-0.328204	960
0.0449986	0.139722	1200
0.114545	0.107632	1200
-0.0878124	0.113221	1200
-0.119114	-0.259443	1200
