# Supplementary material for: Spinal premotor interneurons controlling antagonistic muscles are spatially intermingled
Source: eLife. 2022 Dec 13;11:e81976. doi: 10.7554/eLife.81976 (PMC9844990; doi:10.7554/eLife.81976)
Supplement: Figure 12—figure supplement 16—source data 2. [file elife-81976-fig12-figsupp16-data2.xlsx]

## Sheet: Sheet1
0.273498	0.231039	-1680
0.227171	0.184421	-1680
0.200862	0.154039	-1680
0.274588	0.0748609	-1680
0.365738	0.0210245	-1680
0.0455543	0.0965582	-1680
0.241181	0.0208538	-1680
0.247782	-0.030568	-1680
0.338394	-0.102741	-1680
0.302945	-0.163806	-1680
0.283859	-0.19751	-1680
-0.149152	-0.0526615	-1680
0.149642	0.247007	-1440
0.182757	0.169123	-1440
0.219706	0.0153475	-1440
0.367801	-0.0226885	-1440
0.214758	-0.0802903	-1440
0.34465	-0.163043	-1440
-0.0500888	-0.0158317	-1440
-0.173203	-0.00710284	-1440
0.187404	0.215873	-1200
0.221492	0.152234	-1200
0.306212	0.0865971	-1200
0.379185	0.0457038	-1200
0.364203	0.0405957	-1200
0.169073	0.0432649	-1200
0.0318184	-0.00295743	-1200
0.168842	-0.029006	-1200
-0.124361	-0.130798	-1200
0.116679	0.170635	-960
0.271963	0.0576819	-960
0.246918	0.0372659	-960
0.203329	0.0489911	-960
0.386575	0.00350198	-960
0.108611	0.0227904	-960
0.0691164	0.023918	-960
0.331674	-0.0035459	-960
0.252731	-0.0219808	-960
0.200011	-0.0086525	-960
0.400122	-0.0557043	-960
0.144273	-0.0536505	-960
0.233191	-0.0874926	-960
0.276292	-0.098174	-960
0.343889	-0.143153	-960
0.274378	-0.164541	-960
0.144554	-0.259225	-960
0.276472	-0.303106	-960
0.377404	-0.31478	-960
-0.0926153	-0.0718269	-960
-0.229608	-0.111625	-960
-0.205365	-0.1766	-960
0.354516	0.124334	-720
0.215552	0.115985	-720
0.26194	0.0946043	-720
0.244001	0.0994078	-720
0.111574	0.0899404	-720
0.19304	0.0685252	-720
0.256997	0.061346	-720
0.222453	0.0496166	-720
0.360168	0.0365596	-720
0.269232	0.00611364	-720
0.346684	0.0146465	-720
0.337644	0.00262013	-720
0.0496992	-0.00351969	-720
0.357839	-0.142189	-720
0.329422	-0.193405	-720
0.316225	-0.191622	-720
0.297499	-0.194938	-720
0.360239	-0.216563	-720
0.311054	-0.213629	-720
0.328596	-0.226576	-720
0.296842	-0.23476	-720
0.42592	-0.246819	-720
0.298358	-0.256128	-720
0.28505	-0.270602	-720
0.276731	-0.280246	-720
0.320596	-0.28318	-720
0.338418	-0.298739	-720
0.214797	-0.328548	-720
0.237081	-0.330318	-720
0.210082	-0.346732	-720
0.396813	-0.38489	-720
-0.119997	-0.166029	-720
0.270656	0.224139	-480
0.351505	0.107939	-480
0.0751218	0.0066199	-480
0.273754	-0.126054	-480
0.337685	-0.155531	-480
0.320851	-0.156011	-480
0.347719	-0.16396	-480
0.322657	-0.186307	-480
0.377345	-0.197368	-480
0.361011	-0.193336	-480
0.322959	-0.215818	-480
0.331836	-0.243488	-480
0.373751	-0.238861	-480
0.289419	-0.246567	-480
0.363917	-0.246215	-480
0.385341	-0.250179	-480
0.424737	-0.261153	-480
0.425977	-0.299675	-480
0.436474	-0.314539	-480
0.247708	-0.316744	-480
0.314821	-0.316501	-480
0.319218	-0.339348	-480
0.296875	-0.395494	-480
0.315541	-0.398079	-480
-0.122668	-0.0422071	-480
-0.173108	-0.174346	-480
0.124834	0.0367792	-240
0.20555	0.0297322	-240
0.05164	0.0235649	-240
0.188724	-0.0310304	-240
0.327478	-0.0428605	-240
0.28087	-0.119472	-240
0.407362	-0.159191	-240
0.376457	-0.176681	-240
0.357485	-0.213202	-240
0.314046	-0.194001	-240
0.290624	-0.222823	-240
0.325563	-0.219801	-240
0.272668	-0.226589	-240
0.29409	-0.237809	-240
0.414705	-0.2594	-240
0.313023	-0.248755	-240
0.389037	-0.277429	-240
0.338559	-0.274639	-240
0.364947	-0.283376	-240
0.277931	-0.327057	-240
0.276868	-0.340079	-240
0.267537	-0.358656	-240
0.232663	0.103556	0
0.205195	0.10857	0
0.220651	0.0640762	0
0.3018	0.0422537	0
0.302205	0.0210622	0
0.0737958	0.00318683	0
0.373366	-0.150852	0
0.357299	-0.201207	0
0.339793	-0.202681	0
0.391012	-0.204411	0
0.281539	-0.298202	0
0.300698	-0.314403	0
0.29231	-0.338762	0
0.265083	0.173441	240
0.300405	0.137281	240
0.213074	0.119691	240
0.12673	0.117926	240
0.255222	0.0941102	240
0.116153	0.10389	240
0.166366	0.037582	240
0.286759	-0.0179903	240
0.314731	-0.0889181	240
0.314268	-0.148242	240
0.337074	-0.159236	240
0.376942	-0.185629	240
0.325232	-0.293593	240
-0.0546667	0.065316	240
0.254124	0.211242	480
0.187534	0.186059	480
0.260908	0.101342	480
0.317183	0.0928328	480
0.243592	0.0423303	480
0.228158	0.0387419	480
0.184659	0.0113031	480
0.377942	-0.030563	480
0.321456	-0.168863	480
0.251838	-0.271378	480
-0.0801688	0.278269	480
-0.248907	0.168478	480
-0.0376745	-0.007743	480
-0.142379	-0.170175	480
-0.201171	-0.229095	480
0.2355	0.284874	720
0.279797	0.25124	720
0.250196	0.16668	720
0.0882495	0.098449	720
0.0941438	0.0862759	720
0.155556	0.071306	720
0.232204	0.0541271	720
0.0345527	0.0480485	720
0.0923877	0.0439326	720
0.222452	-0.00069127	720
0.343541	-0.0638482	720
0.265396	-0.274308	720
0.364887	-0.328919	720
-0.0764122	0.153984	720
0.224798	0.117957	960
0.0507027	0.10398	960
0.0184506	0.110773	960
0.13164	0.103197	960
0.109913	0.0855563	960
0.218699	0.0795832	960
0.176988	0.0755736	960
0.0532881	0.078688	960
0.180187	0.016189	960
0.148387	0.0172948	960
0.00898313	0.23028	1200
0.194086	0.0984858	1200
0.238361	-0.244513	1200
0.365738	0.0210245	-1680
0.302945	-0.163806	-1680
0.149642	0.247007	-1440
0.182757	0.169123	-1440
0.34465	-0.163043	-1440
-0.173203	-0.00710284	-1440
0.187404	0.215873	-1200
0.306212	0.0865971	-1200
0.379185	0.0457038	-1200
0.0318184	-0.00295743	-1200
0.203329	0.0489911	-960
0.386575	0.00350198	-960
0.331674	-0.0035459	-960
0.144273	-0.0536505	-960
0.343889	-0.143153	-960
-0.0926153	-0.0718269	-960
0.354516	0.124334	-720
0.111574	0.0899404	-720
0.19304	0.0685252	-720
0.360168	0.0365596	-720
0.346684	0.0146465	-720
0.337644	0.00262013	-720
0.357839	-0.142189	-720
0.270656	0.224139	-480
0.0751218	0.0066199	-480
0.331836	-0.243488	-480
0.247708	-0.316744	-480
0.124834	0.0367792	-240
0.20555	0.0297322	-240
0.188724	-0.0310304	-240
0.28087	-0.119472	-240
0.0737958	0.00318683	0
0.12673	0.117926	240
0.314731	-0.0889181	240
0.314268	-0.148242	240
0.337074	-0.159236	240
0.184659	0.0113031	480
0.377942	-0.030563	480
0.321456	-0.168863	480
0.251838	-0.271378	480
-0.0801688	0.278269	480
-0.248907	0.168478	480
-0.0376745	-0.007743	480
-0.201171	-0.229095	480
0.2355	0.284874	720
0.279797	0.25124	720
0.250196	0.16668	720
0.0941438	0.0862759	720
0.0345527	0.0480485	720
0.0923877	0.0439326	720
0.265396	-0.274308	720
0.364887	-0.328919	720
0.224798	0.117957	960
0.0184506	0.110773	960
0.13164	0.103197	960
0.109913	0.0855563	960
0.218699	0.0795832	960
0.176988	0.0755736	960
0.180187	0.016189	960
0.00898313	0.23028	1200
0.194086	0.0984858	1200
