# Supplementary material for: Spinal premotor interneurons controlling antagonistic muscles are spatially intermingled
Source: eLife. 2022 Dec 13;11:e81976. doi: 10.7554/eLife.81976 (PMC9844990; doi:10.7554/eLife.81976)
Supplement: Figure 12—figure supplement 16—source data 3. [file elife-81976-fig12-figsupp16-data3.xlsx]

## Sheet: Sheet1
0.301776	0.00449843	-1920
0.0489457	0.018126	-1920
0.279351	0.0241377	-1920
0.22031	0.0296615	-1920
0.330278	0.0377736	-1920
0.343653	0.0541548	-1920
0.369597	0.0940206	-1920
0.281044	0.107995	-1920
0.22109	0.13578	-1920
0.295146	-0.191905	-1920
0.233048	-0.0922801	-1920
0.366282	-0.117843	-1920
0.276528	-0.112331	-1920
0.169562	-0.108133	-1920
0.311181	-0.0956871	-1920
0.342872	-0.07282	-1920
0.194666	-0.0613865	-1920
0.363916	-0.0521975	-1920
0.301746	-0.0463254	-1920
0.193333	-0.0248813	-1920
0.362018	-0.0233982	-1920
0.157891	0.0104618	-1680
0.209772	0.0135777	-1680
0.0680207	0.0217337	-1680
0.39189	0.015089	-1680
0.312326	0.0514988	-1680
0.0604951	0.0544355	-1680
0.156636	0.0594756	-1680
0.386115	0.0639548	-1680
0.267788	0.06591	-1680
0.110642	0.0840682	-1680
0.207257	0.110935	-1680
0.369757	0.101432	-1680
0.400486	0.10595	-1680
0.10572	0.121218	-1680
0.0845748	0.12491	-1680
0.125185	0.135886	-1680
0.260315	0.145195	-1680
0.384246	0.158064	-1680
0.2792	-0.237149	-1680
0.193004	-0.208662	-1680
0.386648	-0.204786	-1680
0.19036	-0.179637	-1680
0.244465	-0.169123	-1680
0.377756	-0.104719	-1680
0.18752	-0.0954911	-1680
0.408503	-0.081262	-1680
0.158612	-0.0543732	-1680
-0.00211363	0.012937	-1680
-0.181146	-0.162134	-1680
-0.251335	-0.137555	-1680
0.0503381	0.0172809	-1440
0.0158201	0.0277905	-1440
0.0321039	0.044555	-1440
0.167298	0.0912265	-1440
0.293462	0.117264	-1440
0.27169	0.13029	-1440
0.303051	0.132174	-1440
0.203448	-0.123414	-1440
0.40342	-0.0745815	-1440
0.338877	-0.0368825	-1440
0.366287	-0.0191276	-1440
-0.242851	-0.391029	-1440
-0.170733	-0.163938	-1440
-0.0927022	-0.151931	-1440
-0.408745	-0.15138	-1440
-0.078228	-0.0981683	-1440
0.0348112	0.0060381	-1200
0.0575414	0.0129585	-1200
0.255206	0.0018567	-1200
0.290571	0.0290473	-1200
0.316797	0.0429572	-1200
0.109149	0.0475913	-1200
0.168413	0.0943309	-1200
0.187876	0.0924512	-1200
0.316953	0.10574	-1200
0.100619	0.118483	-1200
0.320538	0.123685	-1200
0.230675	-0.265676	-1200
0.183318	-0.182742	-1200
0.350237	-0.131751	-1200
0.306712	-0.109494	-1200
0.265312	-0.094618	-1200
0.16094	-0.0688421	-1200
0.357967	-0.0604082	-1200
0.235222	-0.0372022	-1200
0.318637	-0.0263796	-1200
0.1557	-0.0146946	-1200
0.114887	-0.00790783	-1200
0.302154	-0.0124266	-1200
0.326461	-0.0085546	-1200
-0.134987	-0.122024	-1200
-0.410846	-0.0377325	-1200
0.293778	0.000538603	-960
0.172439	0.0540934	-960
0.203389	0.0562156	-960
0.249569	0.0684508	-960
0.160541	0.0710634	-960
0.264805	0.11637	-960
0.247395	0.131885	-960
0.231912	0.145382	-960
0.227151	0.16027	-960
0.21062	-0.24361	-960
0.308108	-0.158681	-960
0.31081	-0.0705481	-960
0.223539	-0.0484107	-960
0.186571	-0.0517142	-960
0.346756	-0.0348442	-960
0.122783	-0.031052	-960
0.32067	-0.0251602	-960
-0.346852	0.0384218	-960
-0.360865	0.0459952	-960
-0.388005	0.0908633	-960
-0.327342	0.0970279	-960
-0.375184	0.154857	-960
-0.131817	-0.207212	-960
-0.211827	-0.0980228	-960
-0.36928	-0.0412301	-960
0.105252	0.012721	-720
0.162239	0.0209892	-720
0.0771747	0.104448	-720
0.203727	0.0960842	-720
0.285926	0.0924608	-720
0.11957	0.120513	-720
0.228687	0.240354	-720
0.359441	-0.176825	-720
0.330119	-0.130569	-720
0.200821	-0.0877557	-720
0.255833	-0.105471	-720
0.251563	-0.0931361	-720
0.269284	-0.0732049	-720
0.117755	-0.0346085	-720
0.069302	-0.0102227	-720
0.0612865	-0.0227242	-720
0.0325586	-0.0127863	-720
-0.323548	0.132746	-720
-0.37173	0.147068	-720
-0.0150938	0.0956571	-720
-0.150431	-0.178465	-720
-0.423979	-0.125335	-720
-0.179328	-0.165745	-720
-0.117642	-0.17284	-720
-0.106344	-0.155999	-720
-0.159825	-0.109803	-720
-0.185284	-0.0344201	-720
0.247572	0.0213664	-480
0.142295	0.0282775	-480
0.248576	0.0821419	-480
0.214502	0.0877869	-480
0.228994	0.0911897	-480
0.193404	0.13132	-480
0.185534	0.145564	-480
0.238391	-0.372784	-480
0.206401	-0.174726	-480
0.334491	-0.149898	-480
0.35436	-0.132488	-480
0.201129	-0.11803	-480
0.279054	-0.100653	-480
0.323617	-0.0782427	-480
0.322084	-0.0525017	-480
0.262792	-0.0350258	-480
0.0547311	-0.00279614	-480
-0.211328	-0.351872	-480
-0.222338	-0.218664	-480
-0.169468	-0.194317	-480
0.31858	0.00822128	-240
0.257936	0.0149571	-240
0.21404	0.0359329	-240
0.305619	0.0688351	-240
0.217715	0.0992615	-240
0.271892	0.107304	-240
0.193248	0.114774	-240
0.239679	0.13802	-240
0.105608	0.127041	-240
0.188921	0.134537	-240
0.0873616	0.140778	-240
0.103363	0.142519	-240
0.249234	0.169053	-240
0.234153	0.179366	-240
0.224304	0.181671	-240
0.166426	0.196389	-240
0.277613	0.255995	-240
0.417952	-0.244287	-240
0.411889	-0.227801	-240
0.255996	-0.229986	-240
0.371989	-0.131124	-240
0.28183	-0.138986	-240
0.190503	-0.108583	-240
0.349804	-0.115491	-240
0.323518	-0.0741026	-240
0.398133	-0.0748897	-240
0.222027	-0.0774854	-240
0.126825	-0.0573311	-240
0.261228	-0.0330657	-240
0.340518	-0.0226411	-240
0.217005	-0.0310729	-240
0.25161	-0.0223564	-240
0.414802	-0.0159593	-240
0.202792	-0.0235119	-240
0.259908	-0.00886719	-240
0.235946	-0.00723442	-240
0.337189	-0.00705859	-240
-0.0753429	-0.130436	-240
-0.238986	-0.133974	-240
-0.0693844	-0.109466	-240
-0.0971498	-0.0938777	-240
-0.155055	-0.0680652	-240
-0.111483	-0.0824799	-240
-0.385308	-0.0177618	-240
0.138813	0.0166525	0
0.130149	0.0147501	0
0.103968	0.0275792	0
0.0335169	0.030859	0
0.158072	0.0621679	0
0.131798	0.0596377	0
0.109252	0.0817535	0
0.203039	0.0729072	0
0.157865	0.105575	0
0.105236	0.144643	0
0.15269	0.141569	0
0.172373	0.138233	0
0.097291	0.152487	0
0.12979	0.186073	0
0.309897	-0.349639	0
0.20151	-0.332571	0
0.323551	-0.326147	0
0.330658	-0.311284	0
0.224202	-0.29656	0
0.259581	-0.288203	0
0.269044	-0.261915	0
0.326783	-0.255688	0
0.293429	-0.234466	0
0.42015	-0.23658	0
0.318212	-0.220064	0
0.364909	-0.222095	0
0.33407	-0.189679	0
0.302768	-0.1906	0
0.430256	-0.174717	0
0.284989	-0.157797	0
0.351147	-0.167264	0
0.40223	-0.159491	0
0.378639	-0.150336	0
0.301097	-0.140482	0
0.368218	-0.142794	0
0.332688	-0.138048	0
0.431949	-0.141264	0
0.390165	-0.130653	0
0.219424	-0.122872	0
0.43153	-0.127379	0
0.324503	-0.115345	0
0.378993	-0.111348	0
0.350787	-0.0918535	0
0.327833	-0.0923306	0
0.095887	-0.036776	0
0.0418812	-0.0119598	0
-0.123124	-0.186142	0
-0.113148	-0.183389	0
-0.157956	-0.16882	0
0.141763	0.0285913	240
0.203329	0.0132626	240
0.232859	0.0255869	240
0.095531	0.0112507	240
0.182394	0.050867	240
0.119886	0.0533301	240
0.138136	0.0543045	240
0.194802	0.0637236	240
0.261615	0.0685054	240
0.102562	0.111433	240
0.194415	0.113779	240
0.134138	0.114022	240
0.274017	0.172675	240
0.17681	0.183078	240
0.285197	0.191108	240
0.220093	0.221296	240
0.208712	0.274283	240
0.303744	-0.392584	240
0.378844	-0.3465	240
0.398585	-0.342243	240
0.315764	-0.25014	240
0.308801	-0.222661	240
0.338381	-0.213237	240
0.283111	-0.208688	240
0.315254	-0.201751	240
0.339413	-0.19115	240
0.278744	-0.154281	240
0.367676	-0.167979	240
0.243035	-0.147912	240
0.193534	-0.145817	240
0.102646	-0.135817	240
0.320081	-0.140399	240
0.337742	-0.127219	240
0.393124	-0.124598	240
0.266751	-0.120859	240
0.349286	-0.106093	240
0.427627	-0.108655	240
0.260236	-0.107453	240
0.391235	-0.0787222	240
0.207943	-0.0910093	240
0.406053	-0.075759	240
0.28532	-0.083622	240
0.37784	-0.0526373	240
0.19996	-0.0428627	240
0.0436755	-0.0170199	240
0.168148	-0.0137645	240
-0.126873	-0.210906	240
-0.10803	-0.186623	240
-0.130567	-0.168389	240
-0.115673	-0.129195	240
-0.0680753	-0.0774703	240
0.0683799	0.00121256	480
0.189996	0.042197	480
0.35756	0.0368283	480
0.269017	0.0412771	480
0.188348	0.060285	480
0.314616	0.0621833	480
0.242526	0.0924219	480
0.0386033	0.0950979	480
0.249015	0.113094	480
0.15949	0.119391	480
0.255344	0.132754	480
0.190415	0.148467	480
0.214208	0.166931	480
0.194458	0.174073	480
0.286074	0.174065	480
0.241492	0.215885	480
0.235014	-0.392357	480
0.215908	-0.364903	480
0.228255	-0.355089	480
0.214392	-0.344176	480
0.216557	-0.333475	480
0.190409	-0.325427	480
0.158072	-0.250456	480
0.202469	-0.258368	480
0.179355	-0.253176	480
0.314771	-0.246509	480
0.288371	-0.236789	480
0.321197	-0.191037	480
0.256004	-0.186305	480
0.277792	-0.156762	480
0.166255	-0.152269	480
0.327014	-0.157299	480
0.354534	-0.148108	480
0.18999	-0.126145	480
0.418251	-0.129436	480
0.261006	-0.120279	480
0.221541	-0.097599	480
0.31415	-0.0999267	480
0.307414	-0.0921679	480
0.345943	-0.0874358	480
0.289439	-0.0805723	480
0.257187	-0.0801289	480
0.381359	-0.0709803	480
0.269551	-0.0511911	480
-0.398608	0.0209981	480
-0.341172	-0.224005	480
-0.111258	-0.181943	480
-0.115998	-0.134378	480
-0.0261856	-0.0298628	480
0.115518	0.0339789	720
0.275187	0.0288352	720
0.228763	0.0400504	720
0.25681	0.0429871	720
0.124449	0.0561301	720
0.239955	0.0647689	720
0.220208	0.0743987	720
0.219923	0.0914332	720
0.25273	0.082443	720
0.267542	0.101351	720
0.291503	0.215422	720
0.236663	-0.376488	720
0.351199	-0.373395	720
0.290369	-0.354161	720
0.299451	-0.33478	720
0.35731	-0.32854	720
0.428896	-0.32921	720
0.404487	-0.306922	720
0.168636	-0.270215	720
0.231594	-0.263804	720
0.373577	-0.275949	720
0.403814	-0.260337	720
0.302665	-0.244672	720
0.312529	-0.242257	720
0.212617	-0.232667	720
0.166302	-0.227284	720
0.219341	-0.217679	720
0.227126	-0.216799	720
0.159742	-0.204817	720
0.241356	-0.203602	720
0.312044	-0.162198	720
0.39059	-0.165166	720
0.357335	-0.160834	720
0.302216	-0.149219	720
0.339097	-0.141772	720
0.248953	-0.134083	720
0.40921	-0.145753	720
0.360105	-0.131925	720
0.354249	-0.112832	720
0.263449	-0.101606	720
0.323467	-0.0845382	720
0.264195	-0.0773012	720
0.347319	-0.0704225	720
0.287701	-0.0240091	720
0.171771	-0.0140923	720
-0.172138	-0.219038	720
-0.208841	-0.169721	720
-0.140327	-0.169914	720
-0.110547	-0.141537	720
0.155322	0.0502602	960
0.352522	0.0381165	960
0.237156	0.078648	960
0.27725	0.133058	960
0.255918	0.170218	960
0.288572	0.175472	960
0.277493	0.243711	960
0.405235	-0.329855	960
0.422136	-0.306907	960
0.393488	-0.285591	960
0.319796	-0.22417	960
0.417809	-0.218734	960
0.336565	-0.156299	960
0.355203	-0.156192	960
0.373552	-0.144809	960
0.390295	-0.140057	960
0.283609	-0.0604985	960
0.375807	-0.0510263	960
0.326548	-0.044404	960
0.0662773	-0.015905	960
-0.164919	-0.29048	960
-0.145377	-0.229794	960
-0.174404	-0.190736	960
-0.143393	-0.163005	960
0.171631	0.0528264	1200
0.196949	0.0670271	1200
0.163737	0.137022	1200
0.243222	0.159909	1200
0.249178	0.191464	1200
0.358883	-0.263383	1200
0.386463	-0.143525	1200
0.286665	-0.125294	1200
0.39901	-0.0857009	1200
0.353392	-0.084173	1200
0.287711	-0.0806955	1200
0.0699964	-0.0667385	1200
0.247827	-0.0316727	1200
0.390832	-0.000562403	1200
0.22927	-0.00773305	1200
-0.0996204	0.117905	1200
-0.1625	-0.205331	1200
-0.102995	-0.131369	1200
-0.00815566	-0.0409292	1200
0.368461	0.0898033	1440
0.281135	0.137743	1440
0.267881	-0.352508	1440
0.33543	-0.268607	1440
0.371339	-0.235268	1440
0.371206	-0.201441	1440
0.286204	-0.164199	1440
0.276796	-0.118982	1440
0.346852	-0.0572258	1440
0.237251	-0.0456664	1440
0.282757	-0.0162112	1440
-0.156234	-0.167215	1440
0.279351	0.0241377	-1920
0.22031	0.0296615	-1920
0.330278	0.0377736	-1920
0.233048	-0.0922801	-1920
0.366282	-0.117843	-1920
0.276528	-0.112331	-1920
0.363916	-0.0521975	-1920
0.362018	-0.0233982	-1920
0.0604951	0.0544355	-1680
0.10572	0.121218	-1680
0.0845748	0.12491	-1680
0.125185	0.135886	-1680
0.260315	0.145195	-1680
0.244465	-0.169123	-1680
-0.181146	-0.162134	-1680
0.0503381	0.0172809	-1440
0.338877	-0.0368825	-1440
0.0575414	0.0129585	-1200
0.290571	0.0290473	-1200
0.316797	0.0429572	-1200
0.100619	0.118483	-1200
0.265312	-0.094618	-1200
0.1557	-0.0146946	-1200
0.302154	-0.0124266	-1200
0.326461	-0.0085546	-1200
-0.134987	-0.122024	-1200
0.293778	0.000538603	-960
0.172439	0.0540934	-960
0.203389	0.0562156	-960
0.249569	0.0684508	-960
0.160541	0.0710634	-960
0.264805	0.11637	-960
0.231912	0.145382	-960
0.308108	-0.158681	-960
0.223539	-0.0484107	-960
0.105252	0.012721	-720
0.203727	0.0960842	-720
0.11957	0.120513	-720
0.228687	0.240354	-720
0.359441	-0.176825	-720
0.117755	-0.0346085	-720
-0.159825	-0.109803	-720
0.247572	0.0213664	-480
0.248576	0.0821419	-480
0.238391	-0.372784	-480
0.323617	-0.0782427	-480
0.322084	-0.0525017	-480
0.262792	-0.0350258	-480
0.31858	0.00822128	-240
0.257936	0.0149571	-240
0.305619	0.0688351	-240
0.217715	0.0992615	-240
0.271892	0.107304	-240
0.193248	0.114774	-240
0.234153	0.179366	-240
0.277613	0.255995	-240
0.417952	-0.244287	-240
0.398133	-0.0748897	-240
0.222027	-0.0774854	-240
0.202792	-0.0235119	-240
0.259908	-0.00886719	-240
0.235946	-0.00723442	-240
-0.238986	-0.133974	-240
-0.155055	-0.0680652	-240
0.138813	0.0166525	0
0.130149	0.0147501	0
0.103968	0.0275792	0
0.0335169	0.030859	0
0.158072	0.0621679	0
0.109252	0.0817535	0
0.203039	0.0729072	0
0.105236	0.144643	0
0.309897	-0.349639	0
0.20151	-0.332571	0
0.269044	-0.261915	0
0.378993	-0.111348	0
0.350787	-0.0918535	0
0.327833	-0.0923306	0
-0.113148	-0.183389	0
0.095531	0.0112507	240
0.182394	0.050867	240
0.119886	0.0533301	240
0.220093	0.221296	240
0.378844	-0.3465	240
0.193534	-0.145817	240
0.337742	-0.127219	240
0.427627	-0.108655	240
0.260236	-0.107453	240
0.391235	-0.0787222	240
0.207943	-0.0910093	240
0.406053	-0.075759	240
0.28532	-0.083622	240
-0.126873	-0.210906	240
-0.130567	-0.168389	240
0.0683799	0.00121256	480
0.188348	0.060285	480
0.242526	0.0924219	480
0.0386033	0.0950979	480
0.249015	0.113094	480
0.202469	-0.258368	480
0.327014	-0.157299	480
0.221541	-0.097599	480
0.345943	-0.0874358	480
0.289439	-0.0805723	480
0.257187	-0.0801289	480
0.269551	-0.0511911	480
-0.111258	-0.181943	480
0.115518	0.0339789	720
0.124449	0.0561301	720
0.159742	-0.204817	720
0.357335	-0.160834	720
0.248953	-0.134083	720
-0.172138	-0.219038	720
-0.208841	-0.169721	720
-0.140327	-0.169914	720
0.352522	0.0381165	960
0.27725	0.133058	960
0.319796	-0.22417	960
0.373552	-0.144809	960
0.283609	-0.0604985	960
0.0662773	-0.015905	960
-0.164919	-0.29048	960
-0.145377	-0.229794	960
-0.174404	-0.190736	960
-0.143393	-0.163005	960
0.286665	-0.125294	1200
0.353392	-0.084173	1200
0.287711	-0.0806955	1200
0.22927	-0.00773305	1200
-0.1625	-0.205331	1200
-0.102995	-0.131369	1200
0.281135	0.137743	1440
0.267881	-0.352508	1440
0.286204	-0.164199	1440
0.237251	-0.0456664	1440
