# Supplementary material for: Spinal premotor interneurons controlling antagonistic muscles are spatially intermingled
Source: eLife. 2022 Dec 13;11:e81976. doi: 10.7554/eLife.81976 (PMC9844990; doi:10.7554/eLife.81976)
Supplement: Figure 12—figure supplement 16—source data 5. [file elife-81976-fig12-figsupp16-data5.xlsx]

## Sheet: Sheet1
0.241863	0.175267	-2160
0.318388	0.173377	-2160
0.374344	0.176707	-2160
0.344946	0.143016	-2160
0.0747425	0.118928	-2160
0.206864	0.116614	-2160
0.31919	0.140985	-2160
0.402302	0.137899	-2160
0.320678	0.118818	-2160
0.388574	0.0986579	-2160
0.282539	0.0787263	-2160
0.349007	0.0903373	-2160
0.0696786	0.0187744	-2160
0.354484	0.0711694	-2160
0.285856	0.042752	-2160
0.377165	0.0639588	-2160
0.158509	0.0153816	-2160
0.218249	0.018121	-2160
0.292307	-0.00226705	-2160
0.337722	-0.0197815	-2160
-0.125848	-0.0572692	-2160
-0.114841	-0.0820035	-2160
-0.135929	-0.114635	-2160
0.106861	0.184729	-1920
0.186991	0.198894	-1920
0.226157	0.138658	-1920
0.135727	0.125384	-1920
0.0773684	0.0886714	-1920
0.325615	0.132855	-1920
0.363634	0.123412	-1920
0.203594	0.0914969	-1920
0.0570994	0.0473888	-1920
0.126917	0.0520158	-1920
0.0783144	0.0330053	-1920
0.0286709	0.0175503	-1920
0.149533	0.0215326	-1920
0.268936	0.0316779	-1920
0.338954	0.0572591	-1920
0.365	0.037509	-1920
0.329009	0.00498729	-1920
0.242074	-0.0317897	-1920
0.276876	-0.198825	-1920
0.210476	0.225449	-1680
0.191048	0.19913	-1680
0.213136	0.133227	-1680
0.0564624	0.075035	-1680
0.0345628	0.0615461	-1680
0.295377	0.0668261	-1680
0.0965959	0.0511888	-1680
0.1705	0.0113708	-1680
0.143048	-0.0252933	-1680
0.319836	-0.0108911	-1680
0.181767	-0.0270904	-1680
0.335385	-0.0193527	-1680
0.176385	-0.0387803	-1680
0.204572	-0.0680506	-1680
0.348765	-0.165663	-1680
-0.0681665	0.0379059	-1680
-0.0245127	-0.0583242	-1680
-0.100519	-0.139637	-1680
0.185318	0.164992	-1440
0.112633	0.158094	-1440
0.226793	0.140261	-1440
0.100379	0.106318	-1440
0.0919519	0.0917955	-1440
0.277326	0.119457	-1440
0.116756	0.0465851	-1440
0.0600728	0.0231977	-1440
0.0935646	0.023261	-1440
0.036155	0.0034765	-1440
0.22693	0.027417	-1440
0.345093	0.0607677	-1440
0.194205	-0.0512306	-1440
0.371953	-0.111434	-1440
0.383355	-0.112135	-1440
-0.0568128	0.0333144	-1440
-0.0728076	-0.0993558	-1440
0.169214	0.27435	-1200
0.0958998	0.219556	-1200
0.0710404	0.196708	-1200
0.103203	0.191713	-1200
0.133447	0.19131	-1200
0.216548	0.204074	-1200
0.221517	0.190378	-1200
0.149328	0.160297	-1200
0.228376	0.167894	-1200
0.0798796	0.0877169	-1200
0.177022	-0.0955631	-1200
0.349812	-0.310188	-1200
-0.0976884	-0.0662473	-1200
-0.123955	-0.0918439	-1200
-0.146374	-0.115378	-1200
0.293388	0.266456	-960
0.228463	0.199643	-960
0.0523608	0.0307934	-960
0.0360015	0.00316813	-960
0.195336	0.00446969	-960
0.166595	-0.0182128	-960
0.242199	-0.126588	-960
0.327504	-0.119828	-960
0.337133	-0.18797	-960
0.417245	-0.338726	-960
-0.112278	-0.0883228	-960
-0.108392	-0.115428	-960
-0.161214	-0.155119	-960
0.209556	0.219319	-720
0.226681	0.206319	-720
0.202279	0.192018	-720
0.112039	0.134485	-720
0.172211	0.146998	-720
0.288395	0.159891	-720
0.21838	0.156809	-720
0.0879456	0.10861	-720
0.253837	0.135698	-720
0.243994	0.0913599	-720
0.226712	0.0561248	-720
0.28322	0.0669016	-720
0.309864	0.0124594	-720
0.146027	-0.0101443	-720
0.12884	-0.029272	-720
0.221066	-0.00797056	-720
0.248359	-0.00602732	-720
0.169059	-0.0855847	-720
0.298129	-0.0537848	-720
0.234161	-0.0781164	-720
0.162859	-0.122045	-720
0.348808	-0.0844072	-720
0.348557	-0.113177	-720
0.334809	-0.120999	-720
0.367721	-0.134454	-720
0.357067	-0.164277	-720
0.265802	-0.19499	-720
0.268813	-0.213904	-720
0.190972	-0.23262	-720
0.206116	-0.231492	-720
0.227669	-0.235749	-720
0.253544	-0.238804	-720
0.330418	-0.220351	-720
0.356163	-0.263959	-720
0.36253	-0.24353	-720
0.264762	-0.315133	-720
0.306597	-0.333232	-720
-0.0813947	-0.0998392	-720
-0.0918735	-0.13758	-720
0.167503	0.239089	-480
0.218839	0.162133	-480
0.123345	0.0971778	-480
0.282936	0.12939	-480
0.0888803	0.0677085	-480
0.226381	0.088044	-480
0.203677	0.0809988	-480
0.334277	0.0561952	-480
0.0297926	-0.00611661	-480
0.0830135	-0.005175	-480
0.173293	-0.0261276	-480
0.232602	-0.0151269	-480
0.365784	-0.0555088	-480
0.187951	-0.0863291	-480
0.263019	-0.0851502	-480
0.401493	-0.0580503	-480
0.238955	-0.0879827	-480
0.304009	-0.0853645	-480
0.359923	-0.081001	-480
0.272469	-0.10154	-480
0.343727	-0.0968552	-480
0.20747	-0.126497	-480
0.27655	-0.11176	-480
0.335659	-0.104028	-480
0.225375	-0.130164	-480
0.332104	-0.127178	-480
0.320382	-0.147235	-480
0.366879	-0.141685	-480
0.352928	-0.141601	-480
0.233304	-0.162569	-480
0.115267	-0.187716	-480
0.318463	-0.160984	-480
0.244081	-0.176861	-480
0.281941	-0.182603	-480
0.429798	-0.162301	-480
0.337733	-0.182786	-480
0.350489	-0.190296	-480
0.361504	-0.18888	-480
0.309234	-0.199911	-480
0.20339	-0.232148	-480
0.275527	-0.211563	-480
0.345762	-0.20661	-480
0.394802	-0.207689	-480
0.278883	-0.243271	-480
0.240006	-0.240546	-480
0.264827	-0.245568	-480
0.20747	-0.254876	-480
0.324711	-0.247604	-480
0.21676	-0.27713	-480
0.278772	-0.269689	-480
0.348654	-0.267638	-480
0.195588	-0.293046	-480
0.324949	-0.280897	-480
0.304927	-0.303059	-480
0.294377	-0.307201	-480
0.327011	-0.316425	-480
-0.10687	-0.0922634	-480
0.188952	0.232558	-240
0.221457	0.186972	-240
0.24241	0.138211	-240
0.25908	0.155115	-240
0.290863	0.130923	-240
0.214104	0.117842	-240
0.0889145	0.071649	-240
0.152491	0.0861242	-240
0.102543	0.0607578	-240
0.326161	0.110087	-240
0.249887	0.06919	-240
0.0164048	0.0234848	-240
0.0309982	0.0223797	-240
0.213929	0.0607379	-240
0.138535	0.0378007	-240
0.186898	0.0330619	-240
0.000411955	-0.0306252	-240
0.090788	-0.0190891	-240
0.287657	-0.0287096	-240
0.350506	-0.0354017	-240
0.301968	-0.0626176	-240
0.34151	-0.0854368	-240
0.397395	-0.0853439	-240
0.235773	-0.132408	-240
0.365438	-0.121775	-240
0.338756	-0.140274	-240
0.375624	-0.146848	-240
0.273216	-0.205912	-240
0.380883	-0.200511	-240
0.264136	-0.262859	-240
0.430177	-0.243458	-240
0.223906	-0.295299	-240
0.448088	-0.289898	-240
0.412175	-0.324017	-240
0.374958	-0.352195	-240
0.257536	0.236324	0
0.181865	0.171456	0
0.243104	0.141138	0
0.292582	0.145677	0
0.183397	0.102485	0
0.0795309	0.0813772	0
0.237072	0.103775	0
0.109167	0.0751635	0
0.321749	0.10807	0
0.282364	0.0852658	0
0.22806	0.0647667	0
0.198922	0.0443082	0
0.260624	0.0455265	0
0.312423	0.0207225	0
0.164237	-0.00127449	0
0.19803	-0.00135036	0
0.214497	-0.0113491	0
0.269046	-0.000280692	0
0.304246	-0.0217119	0
0.1692	-0.0521556	0
0.15347	-0.0569122	0
0.192306	-0.0697406	0
0.209025	-0.0609405	0
0.224692	-0.0601743	0
0.172322	-0.0809228	0
0.269938	-0.0914374	0
0.334517	-0.0933339	0
0.207247	-0.115653	0
0.244562	-0.114211	0
0.265221	-0.116093	0
0.243905	-0.143297	0
0.250863	-0.170001	0
0.235025	-0.218212	0
0.270161	-0.221868	0
0.249571	-0.237754	0
0.272935	-0.235539	0
-0.0023974	-0.0515356	0
0.217972	0.308415	240
0.163563	0.205214	240
0.271755	0.192826	240
0.15977	0.140721	240
0.231928	0.165864	240
0.309541	0.164132	240
0.203225	0.111265	240
0.062973	0.0679958	240
0.219725	0.0890516	240
0.0437041	0.0439915	240
0.292097	0.132875	240
0.129688	0.0638401	240
0.0598586	0.0287142	240
0.0325068	0.0194924	240
0.143463	0.0488992	240
0.163404	0.0501954	240
0.115127	0.0159007	240
0.32262	0.0750903	240
0.149974	0.0118439	240
0.267091	0.0445555	240
0.249405	0.0229061	240
0.175026	0.00183051	240
0.227293	0.0152179	240
0.25863	-0.0057929	240
0.276565	-0.00162234	240
0.262287	-0.0300379	240
0.236037	-0.034487	240
0.308489	-0.0423775	240
0.24793	-0.0582321	240
0.25937	-0.0637874	240
0.354777	-0.0451223	240
0.357625	-0.0624027	240
0.261739	-0.364223	240
-0.0109769	0.0278743	240
-0.0694707	-0.128958	240
0.252683	0.221917	480
0.257298	0.197035	480
0.236847	0.162113	480
0.229614	0.153035	480
0.256839	0.134169	480
0.327029	0.134338	480
0.176024	0.0850391	480
0.233311	0.0679958	480
0.20453	0.0499485	480
0.266224	0.0395707	480
0.139504	0.00915442	480
0.0520105	0.0193804	480
0.165542	0.020106	480
0.261048	0.0233628	480
0.233806	-0.0101954	480
0.22138	-0.0812833	480
0.285584	-0.0721157	480
0.278256	-0.0785207	480
-0.091945	0.117956	480
-0.126101	0.0989491	480
-0.110642	0.0595811	480
-0.0703787	-0.13802	480
0.185505	0.285483	720
0.0827682	0.250969	720
0.175332	0.243822	720
0.131387	0.179096	720
0.228637	0.160509	720
0.0553549	0.143138	720
0.239316	0.109312	720
0.280514	0.123334	720
0.183903	0.0710269	720
0.142734	0.0562557	720
0.347889	0.0828633	720
0.333273	0.0782451	720
-0.101896	0.0567305	720
-0.139146	-0.110441	720
0.266078	0.233506	960
0.076054	0.21039	960
0.44197	0.157904	960
0.0910715	0.108861	960
0.363286	-0.00162081	960
0.365228	-0.0978232	960
0.29055	-0.328461	960
-0.10161	0.125385	960
-0.180521	0.0586132	960
-0.0537561	-0.0188981	960
-0.115923	-0.136849	960
-0.113296	-0.169759	960
-0.210904	-0.216102	960
-0.278994	-0.245605	960
-0.192781	-0.317183	960
0.0458008	0.13974	1200
0.0893087	0.123872	1200
0.115269	0.108146	1200
0.0458647	0.0142653	1200
0.15133	0.00374565	1200
-0.075657	0.15077	1200
-0.0913527	0.113767	1200
-0.118672	-0.25902	1200
0.241243	0.175338	-2160
0.373317	0.176321	-2160
0.0739694	0.117078	-2160
0.319485	0.119251	-2160
0.285366	0.0797575	-2160
0.352106	0.0688944	-2160
0.157895	0.0167355	-2160
0.338295	-0.0185577	-2160
-0.136925	-0.115678	-2160
0.106838	0.183288	-1920
0.227381	0.137738	-1920
0.0769899	0.0883775	-1920
0.326153	0.134629	-1920
0.203552	0.0904161	-1920
0.0562598	0.0469147	-1920
0.0756714	0.0312701	-1920
0.0276244	0.0168582	-1920
0.266689	0.0340103	-1920
0.190564	0.198451	-1680
0.295371	0.0690557	-1680
-0.0245189	-0.0592123	-1680
0.0597662	0.0221469	-1440
-0.0580715	0.0336492	-1440
0.0705025	0.196506	-1200
0.102732	0.190753	-1200
0.176644	-0.0960081	-1200
0.349047	-0.310431	-1200
0.0518239	0.0306724	-960
0.0364653	0.00223989	-960
-0.161411	-0.156364	-960
0.207982	0.221152	-720
0.203403	0.191407	-720
0.333707	0.0558523	-480
0.0279513	-0.00599412	-480
0.213545	0.11833	-240
0.0314722	0.0215335	-240
0.340828	-0.0869473	-240
0.375657	-0.14424	-240
0.374416	-0.352684	-240
0.183157	0.101988	0
0.228449	0.062797	0
0.303514	-0.0213326	0
0.172064	-0.0814387	0
-0.0029196	-0.0518403	0
0.202784	0.110078	240
0.0426358	0.0436353	240
0.0593273	0.0280611	240
0.0321168	0.0194627	240
0.226796	0.0145748	240
0.275496	-0.00197467	240
0.234963	-0.0328974	240
0.247008	-0.05738	240
0.258986	-0.0650329	240
0.252075	0.222549	480
0.176185	0.0842038	480
0.267416	0.0395707	480
0.286293	-0.0717046	480
0.277964	-0.0775998	480
-0.0891111	0.116705	480
-0.112935	0.061076	480
0.183014	0.28639	720
0.130313	0.179017	720
0.229015	0.158887	720
-0.102367	0.0563414	720
-0.140118	-0.11075	720
0.0751692	0.209725	960
0.091096	0.109071	960
0.289387	-0.328204	960
0.0449986	0.139722	1200
0.114545	0.107632	1200
-0.0878124	0.113221	1200
-0.119114	-0.259443	1200
