# Supplementary material for: Spinal premotor interneurons controlling antagonistic muscles are spatially intermingled
Source: eLife. 2022 Dec 13;11:e81976. doi: 10.7554/eLife.81976 (PMC9844990; doi:10.7554/eLife.81976)
Supplement: Figure 12—figure supplement 16—source data 6. [file elife-81976-fig12-figsupp16-data6.xlsx]

## Sheet: Sheet1
0.209988	0.28114	-1680
0.186232	0.158668	-1680
0.255515	0.121057	-1680
0.285245	0.0972409	-1680
0.366772	0.0209542	-1680
0.294557	0.0282636	-1680
0.133614	0.0543184	-1680
0.0949714	0.0143176	-1680
0.0587363	0.0233338	-1680
0.0675864	0.00702825	-1680
0.322412	-0.000228599	-1680
0.339781	-0.0241315	-1680
0.29771	-0.0200096	-1680
0.350707	-0.032904	-1680
0.266717	-0.0176093	-1680
0.3336	-0.0894037	-1680
0.290232	-0.0930899	-1680
0.219611	-0.0721373	-1680
0.303739	-0.162963	-1680
-0.0802699	-0.060774	-1680
-0.132994	-0.122134	-1680
0.231047	0.250337	-1440
0.150185	0.247039	-1440
0.254999	0.16652	-1440
0.182845	0.170654	-1440
0.20626	0.14464	-1440
0.18991	0.1457	-1440
0.279738	0.123434	-1440
0.315859	0.0624933	-1440
0.149398	0.149363	-1440
0.260028	0.107208	-1440
0.11253	0.10257	-1440
0.177225	0.0442326	-1440
0.222054	-0.00557925	-1440
0.268159	-0.0311296	-1440
0.0723099	-0.00327463	-1440
0.130625	-0.0249862	-1440
0.260815	-0.075117	-1440
0.290516	-0.0795748	-1440
0.223059	-0.0863236	-1440
0.356575	-0.12899	-1440
0.243671	-0.120425	-1440
0.19103	-0.103247	-1440
0.346591	-0.163738	-1440
-0.0665612	0.00485753	-1440
-0.0519865	-0.0194055	-1440
-0.173039	-0.00587883	-1440
-0.0582228	-0.0775773	-1440
-0.133549	-0.0717789	-1440
0.188159	0.216209	-1200
0.250321	0.153732	-1200
0.225392	0.144418	-1200
0.288995	0.137457	-1200
0.29441	0.0965156	-1200
0.276221	0.100471	-1200
0.16537	0.106079	-1200
0.307299	0.0876629	-1200
0.259398	0.0657135	-1200
0.231915	0.0737981	-1200
0.380346	0.0457038	-1200
0.206103	0.0246858	-1200
0.31531	0.011714	-1200
0.0332113	-0.00327234	-1200
0.256273	-0.0338256	-1200
0.177471	-0.042335	-1200
0.333254	-0.0964039	-1200
0.259806	-0.127703	-1200
0.406974	-0.180369	-1200
0.246475	-0.201817	-1200
0.390443	-0.22894	-1200
0.430415	-0.235512	-1200
0.421833	-0.243816	-1200
0.312239	-0.254571	-1200
0.374605	-0.254434	-1200
0.380842	-0.266819	-1200
0.410201	-0.278908	-1200
0.263536	-0.274349	-1200
0.445057	-0.285672	-1200
0.435191	-0.290458	-1200
0.397353	-0.29818	-1200
0.444574	-0.325009	-1200
0.464856	-0.325858	-1200
0.249614	-0.369384	-1200
0.373722	-0.386635	-1200
0.426902	-0.388148	-1200
0.36281	-0.401416	-1200
0.446307	-0.414354	-1200
-0.181252	-0.120907	-1200
0.275302	0.167142	-960
0.283824	0.136568	-960
0.158924	0.161091	-960
0.257956	0.104198	-960
0.168282	0.12301	-960
0.206319	0.0801423	-960
0.278298	0.0532815	-960
0.306522	0.0426105	-960
0.33322	0.0267966	-960
0.219604	0.0541799	-960
0.201061	0.0503571	-960
0.387873	0.00421705	-960
0.0391271	0.0563251	-960
0.297451	-0.00325873	-960
0.332437	-0.0033711	-960
0.368674	-0.00937042	-960
0.356018	-0.0121485	-960
0.139437	-0.000599307	-960
0.310843	-0.0311015	-960
0.126058	-0.0223242	-960
0.0489608	-0.0128851	-960
0.354633	-0.0725162	-960
0.275368	-0.0595749	-960
0.143196	-0.0526579	-960
0.255802	-0.0996535	-960
0.286353	-0.127671	-960
0.344659	-0.143347	-960
0.362466	-0.150083	-960
0.167259	-0.149864	-960
0.337086	-0.172532	-960
0.335989	-0.181409	-960
0.394048	-0.200125	-960
0.358774	-0.212542	-960
0.374875	-0.216849	-960
0.433844	-0.229759	-960
0.225063	-0.195836	-960
0.446561	-0.238999	-960
0.362426	-0.228867	-960
0.383023	-0.235777	-960
0.334223	-0.231738	-960
0.211202	-0.214596	-960
0.370166	-0.245579	-960
0.432004	-0.266055	-960
0.317466	-0.251665	-960
0.463084	-0.276474	-960
0.360366	-0.258382	-960
0.339782	-0.264632	-960
0.392295	-0.2755	-960
0.369831	-0.291794	-960
0.274245	-0.284877	-960
0.238516	-0.278085	-960
0.38972	-0.303999	-960
0.197482	-0.281069	-960
0.211523	-0.291251	-960
0.332363	-0.344133	-960
0.315332	-0.356806	-960
0.369985	-0.380029	-960
0.279917	-0.371002	-960
0.290748	-0.389806	-960
-0.0923287	-0.071444	-960
-0.185206	-0.0723055	-960
0.355088	0.124378	-720
0.295203	0.126832	-720
0.277772	0.0940278	-720
0.319093	0.0731017	-720
0.111535	0.0901064	-720
0.0754171	0.0823158	-720
0.191609	0.070534	-720
0.360779	0.0364635	-720
0.374861	0.0125854	-720
0.347432	0.014795	-720
0.153059	0.0251271	-720
0.33806	0.00312669	-720
0.0617581	0.0064892	-720
0.27839	-0.00527625	-720
0.249595	-0.00907883	-720
0.330645	-0.0310851	-720
0.298806	-0.0367035	-720
0.00130086	-0.0279009	-720
0.357273	-0.140827	-720
0.349833	-0.158504	-720
0.384734	-0.180077	-720
0.378198	-0.192425	-720
0.374939	-0.207912	-720
0.32081	-0.206866	-720
0.200559	-0.211412	-720
0.442401	-0.230207	-720
0.429087	-0.242786	-720
0.361235	-0.272246	-720
0.443962	-0.264529	-720
0.207434	-0.258345	-720
0.277622	-0.262418	-720
0.38545	-0.272194	-720
0.429204	-0.281681	-720
0.224443	-0.27797	-720
0.369755	-0.299121	-720
0.283977	-0.294562	-720
0.329845	-0.317766	-720
0.235936	-0.324022	-720
0.308348	-0.329969	-720
0.371544	-0.357824	-720
0.408774	-0.382877	-720
0.367589	-0.395778	-720
0.414999	-0.40881	-720
-0.10028	-0.0510493	-720
-0.145187	-0.11806	-720
0.269679	0.223658	-480
0.232179	0.20293	-480
0.235341	0.16395	-480
0.215319	0.142388	-480
0.311247	0.101671	-480
0.0731806	0.00514117	-480
0.156948	-0.0120763	-480
0.192899	-0.0616738	-480
0.279751	-0.125012	-480
0.328185	-0.151059	-480
0.336689	-0.159516	-480
0.381465	-0.164481	-480
0.38921	-0.202368	-480
0.213583	-0.22489	-480
0.379016	-0.221345	-480
0.394044	-0.236351	-480
0.379549	-0.237778	-480
0.209784	-0.244192	-480
0.33127	-0.245153	-480
0.219002	-0.299283	-480
0.249489	-0.317495	-480
0.356531	-0.317333	-480
-0.152308	-0.202286	-480
0.245581	0.058136	-240
0.126254	0.037038	-240
0.205404	0.0299133	-240
0.194436	0.0193125	-240
0.328772	-0.0303572	-240
0.251715	-0.019025	-240
0.189001	-0.0303432	-240
0.293536	-0.0521171	-240
0.30527	-0.103168	-240
0.282422	-0.118084	-240
0.280745	-0.144065	-240
0.26448	-0.165355	-240
0.298297	-0.190348	-240
0.297082	-0.227374	-240
0.347269	-0.242472	-240
0.309946	-0.26149	-240
0.385715	-0.316349	-240
0.359142	-0.347625	-240
-0.137853	-0.210428	-240
0.19903	0.143901	0
0.313712	0.0997865	0
0.246951	0.0958151	0
0.32502	0.0505201	0
0.272985	0.0447207	0
0.182738	0.00823398	0
0.265864	0.000889723	0
0.0869225	0.0119466	0
0.111795	0.000461038	0
0.0743732	0.00328389	0
0.296152	-0.0294984	0
0.277982	-0.0677026	0
0.310686	-0.0833488	0
0.405406	-0.119239	0
0.321968	-0.117681	0
0.366557	-0.174734	0
0.30547	-0.187668	0
0.354273	-0.202823	0
0.424127	-0.259015	0
-0.0419175	-0.0478316	0
-0.162587	-0.200311	0
0.260973	0.203539	240
0.184354	0.133825	240
0.127145	0.118375	240
0.254704	0.0897475	240
0.191513	0.0885546	240
0.017552	0.0810873	240
0.385184	0.0281783	240
0.116228	0.0333499	240
0.314765	0.0174348	240
0.194426	-0.00121992	240
0.274393	-0.0240038	240
0.142573	-0.0320266	240
0.302535	-0.0421161	240
0.291653	-0.0550042	240
0.333236	-0.0787425	240
0.282873	-0.0833782	240
0.316841	-0.0886597	240
0.253636	-0.102136	240
0.332712	-0.11783	240
0.394174	-0.127905	240
0.280403	-0.130948	240
0.349971	-0.136624	240
0.31452	-0.147977	240
0.411543	-0.160477	240
0.337653	-0.159214	240
0.395665	-0.164582	240
0.384109	-0.1886	240
0.337006	-0.194269	240
0.325668	-0.211061	240
0.279552	-0.27721	240
0.388008	-0.299262	240
0.29362	-0.319161	240
0.247497	-0.332128	240
0.251935	0.200429	480
0.0765072	0.1272	480
0.268482	0.0946632	480
0.208947	0.0767934	480
0.185778	0.00779494	480
0.355101	0.00352418	480
0.333429	-0.0338312	480
0.378179	-0.0303977	480
0.255327	-0.0585265	480
0.291336	-0.0394284	480
0.325247	-0.135227	480
0.322463	-0.170914	480
0.336506	-0.200463	480
0.39688	-0.262708	480
0.253012	-0.271018	480
0.394691	-0.341993	480
0.414405	-0.397913	480
-0.0797059	0.278514	480
-0.248349	0.169032	480
-0.0369664	-0.00753662	480
-0.200415	-0.228988	480
0.236486	0.282594	720
0.280632	0.251756	720
0.250621	0.167196	720
0.294688	0.0873566	720
0.0949283	0.0862839	720
0.228281	0.0359073	720
0.0328615	0.0481041	720
0.0931722	0.0439246	720
0.1643	0.0253234	720
0.342685	-0.12585	720
0.451841	-0.23119	720
0.206079	-0.245495	720
0.26613	-0.274167	720
0.365233	-0.328958	720
-0.138104	-0.101044	720
0.225458	0.120394	960
0.13276	0.103837	960
0.0179519	0.109388	960
0.0464909	0.0997743	960
0.109983	0.0863913	960
0.0905729	0.0857293	960
0.219413	0.0797939	960
0.179819	0.075536	960
0.140478	0.0334612	960
0.18054	0.0160837	960
0.217433	0.0134657	960
0.269594	0.00451365	960
0.373324	-0.0202066	960
0.405775	-0.0755785	960
0.348252	-0.0858264	960
0.345176	-0.213785	960
0.39604	-0.248727	960
0.00975579	0.230575	1200
0.194811	0.0987025	1200
0.36002	0.0721548	1200
0.295148	-0.0935396	1200
0.375239	-0.104457	1200
0.39301	-0.179995	1200
0.3223	-0.225217	1200
0.290488	-0.293543	1200
-0.0277175	-0.0612701	1200
0.365738	0.0210245	-1680
0.302945	-0.163806	-1680
0.149642	0.247007	-1440
0.182757	0.169123	-1440
0.34465	-0.163043	-1440
-0.173203	-0.00710284	-1440
0.187404	0.215873	-1200
0.306212	0.0865971	-1200
0.379185	0.0457038	-1200
0.0318184	-0.00295743	-1200
0.203329	0.0489911	-960
0.386575	0.00350198	-960
0.331674	-0.0035459	-960
0.144273	-0.0536505	-960
0.343889	-0.143153	-960
-0.0926153	-0.0718269	-960
0.354516	0.124334	-720
0.111574	0.0899404	-720
0.19304	0.0685252	-720
0.360168	0.0365596	-720
0.346684	0.0146465	-720
0.337644	0.00262013	-720
0.357839	-0.142189	-720
0.270656	0.224139	-480
0.0751218	0.0066199	-480
0.331836	-0.243488	-480
0.247708	-0.316744	-480
0.124834	0.0367792	-240
0.20555	0.0297322	-240
0.188724	-0.0310304	-240
0.28087	-0.119472	-240
0.0737958	0.00318683	0
0.12673	0.117926	240
0.314731	-0.0889181	240
0.314268	-0.148242	240
0.337074	-0.159236	240
0.184659	0.0113031	480
0.377942	-0.030563	480
0.321456	-0.168863	480
0.251838	-0.271378	480
-0.0801688	0.278269	480
-0.248907	0.168478	480
-0.0376745	-0.007743	480
-0.201171	-0.229095	480
0.2355	0.284874	720
0.279797	0.25124	720
0.250196	0.16668	720
0.0941438	0.0862759	720
0.0345527	0.0480485	720
0.0923877	0.0439326	720
0.265396	-0.274308	720
0.364887	-0.328919	720
0.224798	0.117957	960
0.0184506	0.110773	960
0.13164	0.103197	960
0.109913	0.0855563	960
0.218699	0.0795832	960
0.176988	0.0755736	960
0.180187	0.016189	960
0.00898313	0.23028	1200
0.194086	0.0984858	1200
