# Supplementary material for: Spinal premotor interneurons controlling antagonistic muscles are spatially intermingled
Source: eLife. 2022 Dec 13;11:e81976. doi: 10.7554/eLife.81976 (PMC9844990; doi:10.7554/eLife.81976)
Supplement: Figure 12—figure supplement 16—source data 7. [file elife-81976-fig12-figsupp16-data7.xlsx]

## Sheet: Sheet1
0.150633	0.0166293	-1920
0.35316	0.017357	-1920
0.278258	0.0229966	-1920
0.325624	0.0230545	-1920
0.330687	0.0352184	-1920
0.180421	0.0323573	-1920
0.220742	0.0300337	-1920
0.288792	0.054006	-1920
0.364589	0.0982626	-1920
0.228934	0.121301	-1920
0.24002	0.222094	-1920
0.219865	0.262323	-1920
0.293554	-0.181454	-1920
0.255731	-0.153266	-1920
0.154638	-0.149418	-1920
0.366078	-0.117342	-1920
0.235684	-0.0911377	-1920
0.276072	-0.112562	-1920
0.29992	-0.0523078	-1920
0.362156	-0.0532697	-1920
0.28684	-0.0435096	-1920
0.339191	-0.0312143	-1920
0.361291	-0.023769	-1920
0.335419	-0.00577189	-1920
-0.0875613	0.0846813	-1920
-0.109378	0.11132	-1920
-0.287071	0.156491	-1920
-0.250677	-0.178811	-1920
-0.106971	-0.148509	-1920
-0.124745	-0.139166	-1920
-0.0589956	-0.0341969	-1920
0.158228	0.000467392	-1680
0.213457	0.0414343	-1680
0.409953	0.0403047	-1680
0.315462	0.0497616	-1680
0.341311	0.0520285	-1680
0.0601224	0.0543109	-1680
0.0839181	0.0559	-1680
0.268367	0.0557053	-1680
0.357788	0.063464	-1680
0.281502	0.0841227	-1680
0.376034	0.101961	-1680
0.204222	0.10683	-1680
0.105608	0.120797	-1680
0.0842612	0.124505	-1680
0.124463	0.135489	-1680
0.358178	0.141487	-1680
0.261049	0.145483	-1680
0.241247	0.186707	-1680
0.250831	0.202404	-1680
0.242347	-0.171619	-1680
0.197566	-0.155632	-1680
0.302215	-0.125784	-1680
0.303742	-0.0587318	-1680
0.252494	-0.0330815	-1680
-0.103346	-0.176754	-1680
-0.181901	-0.161072	-1680
-0.10848	-0.117628	-1680
0.228963	0.00454569	-1440
0.192031	0.00607304	-1440
0.212439	0.00295288	-1440
0.140905	0.014568	-1440
0.269902	0.0189901	-1440
0.0498966	0.0171791	-1440
0.0198771	0.0303506	-1440
0.0200503	0.044315	-1440
0.369422	0.0763239	-1440
0.134943	0.0750075	-1440
0.289064	0.0815605	-1440
0.287885	0.0986159	-1440
0.302727	0.128385	-1440
0.228243	0.119752	-1440
0.171562	0.131905	-1440
0.360833	0.146415	-1440
0.237044	0.174693	-1440
0.28812	0.20049	-1440
0.36907	-0.0624069	-1440
0.289802	-0.0463566	-1440
0.31753	-0.0376541	-1440
0.33824	-0.0349267	-1440
0.367902	-0.0134665	-1440
0.189897	-0.0253808	-1440
-0.0164022	0.0603606	-1440
-0.226635	0.057477	-1440
-0.149908	-0.201751	-1440
-0.124939	-0.184915	-1440
-0.146692	-0.188624	-1440
-0.194331	-0.169894	-1440
0.0563613	0.0106031	-1200
0.21634	0.00301521	-1200
0.179593	0.0119381	-1200
0.28915	0.031349	-1200
0.316327	0.0425659	-1200
0.227112	0.0489416	-1200
0.276169	0.110274	-1200
0.0998361	0.119826	-1200
0.131929	0.150569	-1200
0.247834	0.162637	-1200
0.258897	0.17822	-1200
0.283518	0.208825	-1200
0.212676	-0.269254	-1200
0.212419	-0.223316	-1200
0.167988	-0.125741	-1200
0.378499	-0.126887	-1200
0.328615	-0.128793	-1200
0.346574	-0.121825	-1200
0.311466	-0.120911	-1200
0.265038	-0.0963945	-1200
0.340399	-0.0764999	-1200
0.318547	-0.0635903	-1200
0.198721	-0.0437561	-1200
0.155084	-0.0157812	-1200
0.301376	-0.0129354	-1200
0.325952	-0.00889092	-1200
-0.134976	-0.120634	-1200
0.311194	0.000426059	-960
0.293399	0.000522525	-960
0.172917	0.0275009	-960
0.294388	0.0332245	-960
0.23296	0.0400978	-960
0.172093	0.0541738	-960
0.202933	0.0569713	-960
0.250497	0.0681614	-960
0.159948	0.0709991	-960
0.085805	0.08153	-960
0.186182	0.0871973	-960
0.264053	0.116443	-960
0.248729	0.139522	-960
0.231017	0.145776	-960
0.0663303	0.145093	-960
0.206968	0.16023	-960
0.245555	0.176107	-960
0.244754	0.208126	-960
0.307702	-0.159387	-960
0.239626	-0.0817073	-960
0.244024	-0.0597147	-960
0.320001	-0.0406364	-960
0.224335	-0.0477772	-960
0.268506	-0.0396952	-960
0.127154	-0.0326177	-960
0.0890443	-0.0122995	-960
0.175717	-0.0155848	-960
-0.0894448	-0.0711725	-960
0.10439	0.0124416	-720
0.151261	0.0190422	-720
0.144912	0.0506832	-720
0.269974	0.0426071	-720
0.295694	0.0365303	-720
0.164603	0.0606627	-720
0.107513	0.0740123	-720
0.279235	0.0574497	-720
0.21627	0.0779063	-720
0.203202	0.0942943	-720
0.120872	0.119815	-720
0.269712	0.115039	-720
0.271425	0.161479	-720
0.20657	0.176915	-720
0.221476	0.194011	-720
0.230063	0.238032	-720
0.218519	0.263081	-720
0.353355	-0.357376	-720
0.278327	-0.330862	-720
0.196768	-0.273189	-720
0.365127	-0.295486	-720
0.393541	-0.284773	-720
0.244432	-0.247949	-720
0.338192	-0.223001	-720
0.358784	-0.17741	-720
0.251237	-0.105297	-720
0.210892	-0.10203	-720
0.293028	-0.106096	-720
0.409577	-0.125347	-720
0.121734	-0.0856589	-720
0.350346	-0.102053	-720
0.230205	-0.0888555	-720
0.198201	-0.0800649	-720
0.311799	-0.0659968	-720
0.117657	-0.0347668	-720
0.255845	-0.0132769	-720
0.291931	-0.0141235	-720
-0.159889	-0.110479	-720
-0.0748077	-0.0970564	-720
-0.0976909	-0.0840966	-720
0.227108	0.0103579	-480
0.248493	0.0189044	-480
0.29584	0.0165304	-480
0.12466	0.0378001	-480
0.214844	0.040561	-480
0.203517	0.0451948	-480
0.29412	0.0563616	-480
0.0890312	0.0522729	-480
0.232738	0.0612855	-480
0.247479	0.0834872	-480
0.172509	0.0810076	-480
0.211855	0.103922	-480
0.268202	0.116821	-480
0.293574	0.119977	-480
0.241749	0.145098	-480
0.115286	0.131909	-480
0.300351	0.148826	-480
0.201278	0.170782	-480
0.204206	0.182318	-480
0.0969996	0.209971	-480
0.229661	0.192113	-480
0.322189	-0.379223	-480
0.238005	-0.373491	-480
0.364926	-0.331795	-480
0.318808	-0.333144	-480
0.411258	-0.321557	-480
0.407464	-0.305109	-480
0.107769	-0.287065	-480
0.254758	-0.287493	-480
0.191793	-0.263734	-480
0.375514	-0.274532	-480
0.183042	-0.226545	-480
0.375078	-0.221389	-480
0.400886	-0.209678	-480
0.385362	-0.210525	-480
0.364904	-0.21018	-480
0.410398	-0.179586	-480
0.378927	-0.161963	-480
0.348708	-0.154701	-480
0.395597	-0.146386	-480
0.350925	-0.135802	-480
0.192698	-0.126065	-480
0.376506	-0.134766	-480
0.351774	-0.0862035	-480
0.321433	-0.0767213	-480
0.321742	-0.0528883	-480
0.263879	-0.03797	-480
0.114442	-0.0216783	-480
0.232391	-0.0223198	-480
0.137189	-0.0136435	-480
0.183615	-0.011826	-480
0.256594	-0.0122784	-480
-0.0726308	0.0268898	-480
-0.140255	-0.1478	-480
-0.0790574	-0.104158	-480
-0.132854	-0.0926948	-480
0.317713	0.00883596	-240
0.221191	0.00742733	-240
0.280868	0.0155291	-240
0.256311	0.0153327	-240
0.176969	0.0238187	-240
0.366173	0.0287019	-240
0.305145	0.0681948	-240
0.130306	0.0646946	-240
0.244764	0.0725488	-240
0.196303	0.0716438	-240
0.076987	0.0764844	-240
0.217416	0.0979041	-240
0.271103	0.10522	-240
0.194468	0.112298	-240
0.244785	0.119691	-240
0.304078	0.121219	-240
0.103794	0.121629	-240
0.253193	0.149221	-240
0.234132	0.178213	-240
0.212909	0.181987	-240
0.161725	0.198036	-240
0.279185	0.255406	-240
0.342632	-0.362843	-240
0.244243	-0.364669	-240
0.373908	-0.347545	-240
0.318896	-0.324787	-240
0.206447	-0.324871	-240
0.291984	-0.321965	-240
0.306129	-0.310352	-240
0.246505	-0.310636	-240
0.255186	-0.305144	-240
0.330059	-0.300773	-240
0.38596	-0.264257	-240
0.320116	-0.264609	-240
0.289875	-0.269114	-240
0.361152	-0.266686	-240
0.418472	-0.246263	-240
0.387832	-0.240712	-240
0.368219	-0.234926	-240
0.33273	-0.213658	-240
0.353233	-0.223388	-240
0.370553	-0.216279	-240
0.350041	-0.21406	-240
0.176317	-0.216715	-240
0.34931	-0.202907	-240
0.201635	-0.203862	-240
0.265219	-0.197774	-240
0.340008	-0.187576	-240
0.39868	-0.180576	-240
0.354048	-0.183565	-240
0.329649	-0.175502	-240
0.363754	-0.176691	-240
0.301322	-0.168217	-240
0.401083	-0.165923	-240
0.409013	-0.149704	-240
0.290511	-0.119192	-240
0.346817	-0.106498	-240
0.394994	-0.106582	-240
0.333708	-0.103986	-240
0.162203	-0.109806	-240
0.411305	-0.100051	-240
0.34535	-0.07916	-240
0.222127	-0.0772928	-240
0.399122	-0.0757521	-240
0.227827	-0.0463958	-240
0.158517	-0.0278994	-240
0.203397	-0.0234365	-240
0.259561	-0.00923561	-240
0.235467	-0.00567701	-240
0.334392	-0.00525835	-240
0.126741	-3.34927e-05	-240
0.16478	-0.00183373	-240
-0.239189	-0.134426	-240
-0.152974	-0.0685347	-240
0.128762	0.0142722	0
0.0802958	0.0114702	0
0.137795	0.0183018	0
0.10368	0.027448	0
0.034589	0.0308216	0
0.0975304	0.0453936	0
0.107843	0.0493764	0
0.156151	0.0616244	0
0.201727	0.0734976	0
0.109465	0.0829062	0
0.323083	0.0997648	0
0.28894	0.101124	0
0.147672	0.142816	0
0.105715	0.148063	0
0.131842	0.165719	0
0.238096	0.164154	0
0.351054	-0.396754	0
0.300226	-0.383495	0
0.276423	-0.383141	0
0.405533	-0.362043	0
0.309793	-0.350157	0
0.359086	-0.352822	0
0.411411	-0.345304	0
0.201613	-0.3342	0
0.40358	-0.341529	0
0.329281	-0.315569	0
0.299443	-0.323013	0
0.419541	-0.312345	0
0.373371	-0.303379	0
0.117502	-0.286632	0
0.208067	-0.285283	0
0.310528	-0.282528	0
0.354455	-0.275684	0
0.430479	-0.273628	0
0.271253	-0.26226	0
0.444247	-0.271366	0
0.223446	-0.258271	0
0.362803	-0.258106	0
0.304428	-0.254454	0
0.370792	-0.256938	0
0.420091	-0.253056	0
0.409936	-0.246039	0
0.353677	-0.239533	0
0.416249	-0.228207	0
0.179372	-0.214133	0
0.360409	-0.221659	0
0.326272	-0.21563	0
0.391646	-0.207232	0
0.405267	-0.208622	0
0.419568	-0.207618	0
0.354863	-0.202741	0
0.232632	-0.193791	0
0.436912	-0.198373	0
0.373295	-0.191497	0
0.432275	-0.18184	0
0.361116	-0.172594	0
0.434158	-0.165282	0
0.33389	-0.142193	0
0.429859	-0.137184	0
0.376593	-0.138303	0
0.346635	-0.13201	0
0.356229	-0.123168	0
0.400532	-0.133302	0
0.378465	-0.110821	0
0.350613	-0.0931367	0
0.327142	-0.0944116	0
0.161947	-0.0573396	0
0.065842	-0.0208762	0
-0.113491	-0.181629	0
0.217884	0.00634259	240
0.0951161	0.0109439	240
0.233706	0.0148776	240
0.199685	0.0318032	240
0.181744	0.0500009	240
0.11863	0.0536098	240
0.189896	0.11441	240
0.105701	0.123225	240
0.123463	0.153061	240
0.191959	0.159981	240
0.219717	0.222081	240
0.293461	-0.395923	240
0.416492	-0.364588	240
0.377762	-0.346216	240
0.33005	-0.337026	240
0.270973	-0.319697	240
0.314284	-0.306258	240
0.20297	-0.305114	240
0.225313	-0.259814	240
0.356143	-0.258596	240
0.398271	-0.25408	240
0.42151	-0.242377	240
0.432707	-0.229305	240
0.387871	-0.233212	240
0.298428	-0.225816	240
0.245984	-0.230574	240
0.392429	-0.212469	240
0.425682	-0.213638	240
0.333627	-0.208613	240
0.347133	-0.199523	240
0.288544	-0.173963	240
0.24548	-0.161727	240
0.356406	-0.171918	240
0.404775	-0.147929	240
0.434148	-0.156134	240
0.194589	-0.147987	240
0.437147	-0.137762	240
0.335757	-0.126819	240
0.388801	-0.122921	240
0.428384	-0.10934	240
0.259642	-0.108981	240
0.231833	-0.112737	240
0.322913	-0.1055	240
0.208033	-0.0924867	240
0.284608	-0.0828123	240
0.405335	-0.0749076	240
0.392339	-0.0792314	240
0.338813	-0.0747406	240
0.251922	-0.0759092	240
0.375519	-0.0497659	240
0.199836	-0.0527792	240
0.127791	-0.0156343	240
-0.127431	-0.211321	240
-0.131837	-0.166303	240
-0.0952181	-0.158627	240
0.0355654	0.00734224	480
0.294854	0.00444047	480
0.173836	0.0123012	480
0.216545	0.0155458	480
0.312399	0.0398889	480
0.344093	0.0374471	480
0.189726	0.0612885	480
0.334204	0.0658293	480
0.34275	0.0746099	480
0.0938781	0.0737569	480
0.241325	0.0934171	480
0.323431	0.0931829	480
0.0384885	0.0956331	480
0.145592	0.104924	480
0.215431	0.105676	480
0.248854	0.111706	480
0.301252	0.138474	480
0.189921	0.134059	480
0.314346	0.147146	480
0.263453	0.151177	480
0.24921	0.177058	480
0.285224	0.202999	480
0.331413	0.198868	480
0.264825	0.236716	480
0.21542	-0.313831	480
0.318521	-0.305953	480
0.343083	-0.274244	480
0.251318	-0.284024	480
0.201993	-0.258377	480
0.248699	-0.249271	480
0.361437	-0.220555	480
0.396623	-0.219813	480
0.338092	-0.218023	480
0.378183	-0.196878	480
0.316585	-0.188667	480
0.27781	-0.170438	480
0.326239	-0.158007	480
0.34059	-0.151527	480
0.38659	-0.13635	480
0.370189	-0.143683	480
0.197031	-0.13086	480
0.218251	-0.123416	480
0.149727	-0.0991678	480
0.22107	-0.0979998	480
0.199173	-0.0929949	480
0.287957	-0.080308	480
0.22876	-0.0844261	480
0.344622	-0.0867623	480
0.25771	-0.0820473	480
0.00768391	-0.0536978	480
0.300356	-0.0663677	480
0.320209	-0.0590437	480
0.394154	-0.0463568	480
0.267737	-0.0495115	480
0.333733	-0.0396381	480
0.151186	-0.0279147	480
0.190978	-0.0269427	480
0.179515	-0.011732	480
0.37584	-0.0178026	480
0.0683283	-0.0023788	480
0.197634	-0.000272837	480
-0.31071	0.237622	480
-0.111442	-0.182077	480
-0.139353	-0.153892	480
-0.0976126	-0.0772943	480
0.236457	0.0429331	720
0.147519	0.0298442	720
0.114797	0.0336186	720
0.289138	0.0304747	720
0.171516	0.0533195	720
0.122097	0.0553464	720
0.376603	0.0377804	720
0.221875	0.0649401	720
0.276212	0.0672012	720
0.0975111	0.0841996	720
0.346512	0.0709396	720
0.364671	0.080191	720
0.321327	0.113242	720
0.25675	0.145473	720
0.306133	0.155202	720
0.301889	0.213747	720
0.196496	-0.30249	720
0.159742	-0.205853	720
0.396635	-0.185919	720
0.358038	-0.163577	720
0.301701	-0.141476	720
0.350435	-0.147817	720
0.248686	-0.134255	720
0.329803	-0.124587	720
0.309037	-0.117685	720
0.281602	-0.115278	720
0.260024	-0.10156	720
0.251499	-0.083728	720
0.37302	-0.0862131	720
0.29374	-0.0788203	720
0.253463	-0.0703914	720
0.280086	-0.055707	720
0.190463	-0.0415446	720
0.155746	-0.0233391	720
0.226307	-0.0179796	720
0.354697	-0.0336766	720
0.160633	-0.0034666	720
0.0674448	-0.00793033	720
0.249601	-0.0192727	720
0.340152	-0.0107114	720
0.202965	-0.00303814	720
0.251366	-0.000950393	720
-0.12086	-0.236844	720
-0.173151	-0.220794	720
-0.209301	-0.16948	720
-0.140538	-0.17029	720
-0.0993993	-0.127204	720
-0.111765	-0.0916702	720
-0.0315027	-0.0302867	720
0.324024	0.000729409	960
0.370969	0.00968931	960
0.274064	0.0330107	960
0.235753	0.0591117	960
0.352679	0.0381757	960
0.223874	0.0719355	960
0.176569	0.0735126	960
0.274562	0.132131	960
0.283307	0.140313	960
0.293141	0.220893	960
0.320373	-0.223898	960
0.349971	-0.143458	960
0.302863	-0.143673	960
0.25386	-0.13425	960
0.373375	-0.145435	960
0.29103	-0.11916	960
0.266709	-0.0825975	960
0.412709	-0.0836848	960
0.282927	-0.0605891	960
0.321035	-0.0648804	960
0.116965	-0.0356154	960
0.242584	-0.0374522	960
0.297592	-0.0521382	960
0.322818	-0.045796	960
0.0838856	-0.0228733	960
0.0641664	-0.0139365	960
0.120079	-0.0155591	960
0.198248	-0.0209294	960
0.31128	-0.0302781	960
0.192119	-0.00636696	960
0.359398	-0.0222802	960
0.304993	-0.00169676	960
-0.118086	0.0683562	960
-0.210995	0.264065	960
-0.166302	-0.291605	960
-0.147752	-0.230443	960
-0.203946	-0.244203	960
-0.174981	-0.191213	960
-0.143573	-0.163299	960
0.172584	0.0586438	1200
0.118092	0.10008	1200
0.0583472	0.160369	1200
0.0436456	0.222598	1200
0.323908	-0.3258	1200
0.312934	-0.231382	1200
0.28503	-0.128425	1200
0.31752	-0.126203	1200
0.400935	-0.0796269	1200
0.351968	-0.0829545	1200
0.305513	-0.0956367	1200
0.286388	-0.0796269	1200
0.283524	-0.0155598	1200
0.230249	-0.009439	1200
0.3238	-0.00580213	1200
0.120834	-0.00977644	1200
-0.205954	-0.263592	1200
-0.315445	-0.227738	1200
-0.216543	-0.207596	1200
-0.30345	-0.199223	1200
-0.162729	-0.205838	1200
-0.141086	-0.133852	1200
-0.102933	-0.12978	1200
-0.188094	-0.0743301	1200
0.13156	0.129352	1440
0.279619	0.138737	1440
0.266807	-0.3522	1440
0.178793	-0.303435	1440
0.290037	-0.247005	1440
0.400501	-0.244721	1440
0.407781	-0.223961	1440
0.286337	-0.166988	1440
0.288633	-0.104343	1440
0.344016	-0.10702	1440
0.237111	-0.0459753	1440
0.345244	-0.0510483	1440
0.345567	-0.0135811	1440
0.257568	-0.0194684	1440
-0.27118	-0.268434	1440
0.279351	0.0241377	-1920
0.22031	0.0296615	-1920
0.330278	0.0377736	-1920
0.233048	-0.0922801	-1920
0.366282	-0.117843	-1920
0.276528	-0.112331	-1920
0.363916	-0.0521975	-1920
0.362018	-0.0233982	-1920
0.0604951	0.0544355	-1680
0.10572	0.121218	-1680
0.0845748	0.12491	-1680
0.125185	0.135886	-1680
0.260315	0.145195	-1680
0.244465	-0.169123	-1680
-0.181146	-0.162134	-1680
0.0503381	0.0172809	-1440
0.338877	-0.0368825	-1440
0.0575414	0.0129585	-1200
0.290571	0.0290473	-1200
0.316797	0.0429572	-1200
0.100619	0.118483	-1200
0.265312	-0.094618	-1200
0.1557	-0.0146946	-1200
0.302154	-0.0124266	-1200
0.326461	-0.0085546	-1200
-0.134987	-0.122024	-1200
0.293778	0.000538603	-960
0.172439	0.0540934	-960
0.203389	0.0562156	-960
0.249569	0.0684508	-960
0.160541	0.0710634	-960
0.264805	0.11637	-960
0.231912	0.145382	-960
0.308108	-0.158681	-960
0.223539	-0.0484107	-960
0.105252	0.012721	-720
0.203727	0.0960842	-720
0.11957	0.120513	-720
0.228687	0.240354	-720
0.359441	-0.176825	-720
0.117755	-0.0346085	-720
-0.159825	-0.109803	-720
0.247572	0.0213664	-480
0.248576	0.0821419	-480
0.238391	-0.372784	-480
0.323617	-0.0782427	-480
0.322084	-0.0525017	-480
0.262792	-0.0350258	-480
0.31858	0.00822128	-240
0.257936	0.0149571	-240
0.305619	0.0688351	-240
0.217715	0.0992615	-240
0.271892	0.107304	-240
0.193248	0.114774	-240
0.234153	0.179366	-240
0.277613	0.255995	-240
0.417952	-0.244287	-240
0.398133	-0.0748897	-240
0.222027	-0.0774854	-240
0.202792	-0.0235119	-240
0.259908	-0.00886719	-240
0.235946	-0.00723442	-240
-0.238986	-0.133974	-240
-0.155055	-0.0680652	-240
0.138813	0.0166525	0
0.130149	0.0147501	0
0.103968	0.0275792	0
0.0335169	0.030859	0
0.158072	0.0621679	0
0.109252	0.0817535	0
0.203039	0.0729072	0
0.105236	0.144643	0
0.309897	-0.349639	0
0.20151	-0.332571	0
0.269044	-0.261915	0
0.378993	-0.111348	0
0.350787	-0.0918535	0
0.327833	-0.0923306	0
-0.113148	-0.183389	0
0.095531	0.0112507	240
0.182394	0.050867	240
0.119886	0.0533301	240
0.220093	0.221296	240
0.378844	-0.3465	240
0.193534	-0.145817	240
0.337742	-0.127219	240
0.427627	-0.108655	240
0.260236	-0.107453	240
0.391235	-0.0787222	240
0.207943	-0.0910093	240
0.406053	-0.075759	240
0.28532	-0.083622	240
-0.126873	-0.210906	240
-0.130567	-0.168389	240
0.0683799	0.00121256	480
0.188348	0.060285	480
0.242526	0.0924219	480
0.0386033	0.0950979	480
0.249015	0.113094	480
0.202469	-0.258368	480
0.327014	-0.157299	480
0.221541	-0.097599	480
0.345943	-0.0874358	480
0.289439	-0.0805723	480
0.257187	-0.0801289	480
0.269551	-0.0511911	480
-0.111258	-0.181943	480
0.115518	0.0339789	720
0.124449	0.0561301	720
0.159742	-0.204817	720
0.357335	-0.160834	720
0.248953	-0.134083	720
-0.172138	-0.219038	720
-0.208841	-0.169721	720
-0.140327	-0.169914	720
0.352522	0.0381165	960
0.27725	0.133058	960
0.319796	-0.22417	960
0.373552	-0.144809	960
0.283609	-0.0604985	960
0.0662773	-0.015905	960
-0.164919	-0.29048	960
-0.145377	-0.229794	960
-0.174404	-0.190736	960
-0.143393	-0.163005	960
0.286665	-0.125294	1200
0.353392	-0.084173	1200
0.287711	-0.0806955	1200
0.22927	-0.00773305	1200
-0.1625	-0.205331	1200
-0.102995	-0.131369	1200
0.281135	0.137743	1440
0.267881	-0.352508	1440
0.286204	-0.164199	1440
0.237251	-0.0456664	1440
