# Supplementary material for: Spinal premotor interneurons controlling antagonistic muscles are spatially intermingled
Source: eLife. 2022 Dec 13;11:e81976. doi: 10.7554/eLife.81976 (PMC9844990; doi:10.7554/eLife.81976)
Supplement: Figure 12—figure supplement 16—source data 8. [file elife-81976-fig12-figsupp16-data8.xlsx]

## Sheet: Sheet1
0.2	0.323032	-1920
0.315704	0.173574	-1920
0.347895	0.100869	-1920
0.342596	0.0820416	-1920
0.255411	0.126505	-1920
0.222496	0.145842	-1920
0.124092	0.201517	-1920
0.267976	0.0799646	-1920
0.265951	0.0505596	-1920
0.284411	0.0256452	-1920
0.25058	0.0177988	-1920
0.134549	0.0988307	-1920
0.211899	0.0223086	-1920
0.168354	0.0162025	-1920
0.0711476	0.0669833	-1920
0.0455565	0.0727624	-1920
0.0873326	0.028203	-1920
0.300295	-0.0203765	-1920
0.251727	-0.0636717	-1920
0.374608	-0.174914	-1920
0.349997	-0.155582	-1920
0.299109	-0.109472	-1920
0.266047	-0.0912232	-1920
0.279496	-0.106007	-1920
0.256513	-0.1153	-1920
0.397988	-0.270468	-1920
0.298424	-0.205168	-1920
0.313763	-0.211627	-1920
0.302089	-0.23496	-1920
-0.145926	-0.115368	-1920
-0.191679	-0.0921448	-1920
0.171009	0.30945	-1680
0.238945	0.185411	-1680
0.241584	0.157429	-1680
0.22535	0.169494	-1680
0.323438	0.0510528	-1680
0.226377	0.1333	-1680
0.248546	0.12837	-1680
0.244534	0.0470911	-1680
0.186539	0.106506	-1680
0.268721	0.0195489	-1680
0.137507	0.0965273	-1680
0.0888454	0.0110069	-1680
0.0545133	0.029977	-1680
0.315891	-0.012099	-1680
0.263097	-0.00968119	-1680
0.245746	-0.029643	-1680
0.339553	-0.143939	-1680
0.269002	-0.0998292	-1680
0.290133	-0.12137	-1680
0.190719	-0.0190627	-1680
0.158298	-0.0026376	-1680
0.310206	-0.183713	-1680
0.138672	-0.0196421	-1680
0.11809	-0.0216303	-1680
0.129895	-0.0347784	-1680
0.298343	-0.268236	-1680
0.339225	-0.322826	-1680
0.071948	-0.017604	-1680
0.0552238	-0.00353678	-1680
0.0601617	-0.101178	-1680
0.23556	-0.405771	-1680
0.224967	0.345711	-1440
0.243632	0.311497	-1440
0.225839	0.244854	-1440
0.215271	0.255289	-1440
0.182122	0.28147	-1440
0.297917	0.151302	-1440
0.203169	0.233681	-1440
0.133768	0.320081	-1440
0.242068	0.19442	-1440
0.214423	0.219213	-1440
0.232209	0.192789	-1440
0.275986	0.133363	-1440
0.243987	0.138267	-1440
0.322103	0.0613099	-1440
0.177509	0.220105	-1440
0.228684	0.168569	-1440
0.21349	0.127986	-1440
0.22119	0.00859485	-1440
0.207758	0.0166057	-1440
0.0833018	0.0141815	-1440
0.0423877	0.0534203	-1440
0.0133172	0.0382361	-1440
0.300245	-0.0100485	-1440
0.228281	-0.0199666	-1440
0.259968	-0.0293887	-1440
0.314825	-0.0926989	-1440
0.344046	-0.122827	-1440
0.215572	-0.0698265	-1440
0.118423	-0.0108663	-1440
0.114694	-0.0266221	-1440
0.0919213	-0.00963094	-1440
0.162838	-0.0779524	-1440
0.0702733	-0.0163996	-1440
0.114375	-0.0855127	-1440
0.191181	-0.152346	-1440
0.121822	-0.327156	-1440
-0.120156	-0.0654245	-1440
-0.182176	-0.0922631	-1440
-0.224422	-0.0596062	-1440
0.228855	0.187817	-1200
0.250071	0.147885	-1200
0.201124	0.145544	-1200
0.211601	0.11332	-1200
0.291557	0.0392043	-1200
0.150964	0.138555	-1200
0.214116	0.0696249	-1200
0.189078	0.0528431	-1200
0.158053	0.077441	-1200
0.108054	0.107597	-1200
0.150129	0.0171209	-1200
0.286449	-0.0502586	-1200
0.248085	-0.0176077	-1200
0.22757	-0.057422	-1200
0.277596	-0.153741	-1200
0.293198	-0.174315	-1200
0.250221	-0.129629	-1200
0.208023	-0.0751443	-1200
0.188282	-0.0577659	-1200
0.232767	-0.157925	-1200
0.279822	-0.242611	-1200
0.245319	-0.187653	-1200
0.341984	-0.365564	-1200
0.284863	-0.307469	-1200
0.139018	-0.107824	-1200
0.0736681	-0.0101004	-1200
0.338779	-0.432943	-1200
0.306813	-0.372871	-1200
0.232338	-0.276566	-1200
0.288023	-0.455107	-1200
0.195315	-0.564908	-1200
0.191264	-0.61233	-1200
-0.167998	0.0586286	-1200
-0.109532	0.00266493	-1200
-0.379489	0.103999	-1200
-0.148337	-0.0168156	-1200
0.240875	0.346993	-960
0.225208	0.307675	-960
0.250155	0.260523	-960
0.259107	0.22986	-960
0.237836	0.232699	-960
0.171947	0.285834	-960
0.218641	0.214286	-960
0.172435	0.254877	-960
0.262783	0.144242	-960
0.178561	0.217052	-960
0.221752	0.182561	-960
0.22422	0.158764	-960
0.195657	0.172266	-960
0.264103	0.101949	-960
0.246342	0.112538	-960
0.315556	0.0241438	-960
0.193783	0.145041	-960
0.26339	0.0713377	-960
0.300507	0.0295383	-960
0.20512	0.0923478	-960
0.146994	0.0982996	-960
0.138404	0.0883203	-960
0.182083	0.0397699	-960
0.0911573	0.0456797	-960
0.0611483	0.0299273	-960
0.0469914	0.0110308	-960
0.0255597	0.0175715	-960
0.293113	-0.00805259	-960
0.340771	-0.0635801	-960
0.316424	-0.0500471	-960
0.29692	-0.0449112	-960
0.260665	-0.0471808	-960
0.279367	-0.0930754	-960
0.196311	-0.0345051	-960
0.320089	-0.113694	-960
0.199957	-0.0897552	-960
0.297479	-0.213217	-960
0.161299	-0.121394	-960
0.340099	-0.257935	-960
-0.0497233	0.0042414	-960
-0.128354	-0.0897957	-960
-0.155495	-0.0922562	-960
-0.136669	-0.193626	-960
-0.164581	-0.191949	-960
-0.219662	-0.168017	-960
0.21415	0.261088	-720
0.24084	0.209803	-720
0.253991	0.166279	-720
0.309945	0.0684619	-720
0.241181	0.14569	-720
0.269601	0.0664997	-720
0.280414	0.0196225	-720
0.201583	0.0146429	-720
0.184827	0.0277378	-720
0.189363	0.00182421	-720
0.0726812	0.0109354	-720
0.0534955	0.00634035	-720
0.307631	-0.010628	-720
0.280796	-0.00485522	-720
0.282445	-0.0512742	-720
0.260934	-0.0283667	-720
0.242298	-0.0230145	-720
0.2312	-0.0289325	-720
0.297963	-0.103818	-720
0.385456	-0.205517	-720
0.193072	-0.0205525	-720
0.374017	-0.223088	-720
0.288821	-0.150336	-720
0.364066	-0.234182	-720
0.259892	-0.143378	-720
0.40872	-0.289111	-720
0.387353	-0.2847	-720
0.153353	-0.068149	-720
0.394863	-0.308685	-720
0.31753	-0.248167	-720
0.388071	-0.322119	-720
0.12907	-0.0735471	-720
0.330629	-0.271426	-720
0.375545	-0.322242	-720
0.145987	-0.117412	-720
0.353564	-0.336486	-720
0.329096	-0.306957	-720
0.24618	-0.238426	-720
0.399428	-0.377713	-720
0.365425	-0.34326	-720
0.335374	-0.324963	-720
0.363175	-0.361802	-720
0.263179	-0.263405	-720
0.301249	-0.321485	-720
0.38074	-0.394741	-720
0.256432	-0.268284	-720
0.270434	-0.285556	-720
0.329553	-0.37766	-720
0.263011	-0.309618	-720
0.359674	-0.408366	-720
0.270694	-0.338734	-720
0.179117	-0.259414	-720
0.357418	-0.43658	-720
0.312103	-0.399887	-720
0.274073	-0.36564	-720
0.241505	-0.357566	-720
0.246099	-0.374273	-720
0.202289	-0.368408	-720
0.183948	-0.366382	-720
0.201456	-0.409743	-720
-0.00320241	0.0419583	-720
-0.254031	0.108024	-720
-0.0717194	-0.0570959	-720
-0.13783	-0.117715	-720
-0.206426	-0.196677	-720
0.20749	0.278124	-480
0.224429	0.249798	-480
0.283189	0.160945	-480
0.206519	0.224212	-480
0.209957	0.166469	-480
0.220938	0.146616	-480
0.29311	0.0347123	-480
0.232378	0.0967852	-480
0.264637	0.0561024	-480
0.235351	0.0563101	-480
0.142272	0.0764854	-480
0.113551	0.0837331	-480
0.0413791	0.0259485	-480
0.285391	-0.0247577	-480
0.185264	-0.0193868	-480
0.379743	-0.18501	-480
0.378	-0.201579	-480
0.252938	-0.0964326	-480
0.305092	-0.144117	-480
0.308536	-0.183377	-480
0.408528	-0.249278	-480
0.391277	-0.235278	-480
0.362321	-0.217585	-480
0.350351	-0.208636	-480
0.32398	-0.189902	-480
0.121865	-0.0330837	-480
0.354472	-0.239722	-480
0.430636	-0.291896	-480
0.29974	-0.198889	-480
0.40705	-0.302167	-480
0.30697	-0.23451	-480
0.388757	-0.291326	-480
0.192353	-0.135966	-480
0.328496	-0.242836	-480
0.366801	-0.277865	-480
0.410659	-0.33048	-480
0.263983	-0.208644	-480
0.352241	-0.279088	-480
0.225001	-0.198753	-480
0.32037	-0.273337	-480
0.255452	-0.229025	-480
0.411236	-0.356415	-480
0.381373	-0.340279	-480
0.241074	-0.242434	-480
0.379018	-0.352176	-480
0.30067	-0.289761	-480
0.376916	-0.369306	-480
0.258949	-0.282126	-480
0.284826	-0.301278	-480
0.135948	-0.176403	-480
0.395351	-0.375756	-480
0.304738	-0.317299	-480
0.308089	-0.342672	-480
0.36742	-0.39629	-480
0.211482	-0.268855	-480
0.29762	-0.352738	-480
0.204064	-0.281633	-480
0.345299	-0.408505	-480
0.281682	-0.355062	-480
0.203899	-0.298801	-480
0.21004	-0.327828	-480
0.155908	-0.29081	-480
0.145351	-0.298938	-480
-0.0501315	-0.0797288	-480
0.345444	0.19333	-240
0.202715	0.31777	-240
0.32397	0.117593	-240
0.263653	0.184681	-240
0.220018	0.188024	-240
0.243266	0.160687	-240
0.180775	0.220023	-240
0.284666	0.104896	-240
0.228058	0.115771	-240
0.219084	0.0473736	-240
0.241006	0.00315152	-240
0.160843	0.0765126	-240
0.0950032	0.0879608	-240
0.120082	0.0612987	-240
0.158859	0.00154052	-240
0.0653973	0.0340526	-240
0.0358527	0.0115489	-240
0.28875	-0.0388255	-240
0.264765	-0.0235742	-240
0.251958	-0.0274598	-240
0.339179	-0.108437	-240
0.20223	-0.00376621	-240
0.213175	-0.0137896	-240
0.258868	-0.0516232	-240
0.380609	-0.169606	-240
0.401271	-0.193136	-240
0.294358	-0.128156	-240
0.330094	-0.150581	-240
0.224373	-0.0742876	-240
0.391118	-0.200489	-240
0.250054	-0.14454	-240
0.424281	-0.278506	-240
0.257738	-0.170278	-240
0.249446	-0.163886	-240
0.371107	-0.261084	-240
0.37844	-0.26048	-240
0.311207	-0.229515	-240
0.405878	-0.302803	-240
0.369725	-0.277976	-240
0.385461	-0.302699	-240
0.395203	-0.325058	-240
0.00885108	-0.0255953	-240
0.228543	-0.197797	-240
0.338829	-0.282071	-240
0.361482	-0.303385	-240
0.430859	-0.354993	-240
0.328903	-0.280251	-240
0.298953	-0.265596	-240
0.254077	-0.237413	-240
0.26654	-0.244192	-240
0.393852	-0.357604	-240
0.263155	-0.267796	-240
0.375062	-0.356612	-240
0.397887	-0.421443	-240
0.205989	-0.263225	-240
0.279426	-0.324528	-240
0.368901	-0.408257	-240
0.184374	-0.274329	-240
0.275882	-0.361362	-240
0.242941	-0.360758	-240
0.336507	-0.452229	-240
0.206621	-0.355143	-240
0.250146	-0.397496	-240
0.226234	-0.389456	-240
-0.0941967	-0.0346806	-240
-0.0650444	-0.0673488	-240
-0.143502	-0.0861951	-240
0.274475	0.29748	0
0.317791	0.234302	0
0.253901	0.265064	0
0.27944	0.122916	0
0.336737	0.0380794	0
0.200054	0.186297	0
0.318148	0.0442196	0
0.278501	0.0889872	0
0.34581	0.000903269	0
0.196635	0.0744842	0
0.224667	0.00559215	0
0.339035	-0.0494582	0
0.354857	-0.097252	0
0.234234	-0.0211206	0
0.274807	-0.0627512	0
0.201312	-0.0060251	0
0.391448	-0.194962	0
0.157271	-0.01378	0
0.281557	-0.134137	0
0.416218	-0.247538	0
0.414903	-0.263513	0
0.2673	-0.151514	0
0.395437	-0.264414	0
0.440831	-0.303646	0
0.201607	-0.119019	0
0.391336	-0.297033	0
0.0654866	-0.0149719	0
0.257251	-0.196306	0
0.272309	-0.228089	0
0.369221	-0.319854	0
0.213829	-0.217238	0
0.337232	-0.330479	0
0.2222	-0.284532	0
0.25603	-0.309199	0
0.283097	-0.353432	0
0.201713	-0.307622	0
0.277581	-0.451265	0
-0.150167	-0.0926274	0
0.333809	0.236759	240
0.360077	0.157724	240
0.386516	0.130104	240
0.312822	0.200833	240
0.372859	0.135519	240
0.294894	0.197262	240
0.395108	0.048583	240
0.291849	0.136565	240
0.332634	0.108629	240
0.258423	0.17331	240
0.404494	0.00296923	240
0.298298	0.0942559	240
0.275347	0.108421	240
0.349508	0.0236651	240
0.225549	0.128555	240
0.256194	0.0725144	240
0.290996	0.0400008	240
0.135696	0.172719	240
0.272345	0.00473499	240
0.176201	0.0974717	240
0.157199	0.0135934	240
0.348311	-0.0104518	240
0.319292	-0.0145707	240
0.365035	-0.0585328	240
0.427616	-0.114168	240
0.30744	-0.0275968	240
0.332469	-0.0656232	240
0.346835	-0.0772959	240
0.41904	-0.142485	240
0.330119	-0.0938084	240
0.198277	-0.00581797	240
0.221271	-0.0468895	240
0.474004	-0.230924	240
0.389261	-0.176165	240
0.335213	-0.136778	240
0.311639	-0.134586	240
0.350891	-0.159527	240
0.418144	-0.218773	240
0.292601	-0.1487	240
0.211254	-0.0916607	240
0.456965	-0.283367	240
0.282964	-0.161954	240
0.219315	-0.115543	240
0.292451	-0.198267	240
0.297072	-0.218288	240
0.26748	-0.231895	240
0.2511	-0.211845	240
0.257649	-0.24131	240
0.325733	-0.313979	240
0.346355	-0.374991	240
-0.275257	0.105171	240
-0.126868	-0.0871515	240
-0.171071	-0.169209	240
-0.183284	-0.211159	240
0.302691	0.175413	480
0.255605	0.212091	480
0.309254	0.098115	480
0.25215	0.07214	480
0.318952	0.00436774	480
0.299923	0.00984428	480
0.25768	0.0162368	480
0.21106	0.0115509	480
0.195323	0.00130164	480
0.345117	-0.0247383	480
0.258423	-0.00487982	480
0.278448	-0.0358084	480
0.276557	-0.0575017	480
0.230454	-0.0248693	480
0.247459	-0.0568618	480
0.214433	-0.0275212	480
0.27302	-0.0855317	480
0.290976	-0.12686	480
0.195739	-0.049253	480
0.239937	-0.0818005	480
0.22664	-0.0898796	480
0.339437	-0.18864	480
0.152878	-0.0404724	480
0.268158	-0.151166	480
0.282616	-0.171372	480
0.225612	-0.122026	480
0.303775	-0.195686	480
0.399788	-0.283561	480
0.0712214	-0.0013645	480
0.242283	-0.147566	480
0.310427	-0.211058	480
0.158382	-0.0975809	480
0.242863	-0.175257	480
0.302111	-0.231232	480
0.250586	-0.195802	480
0.272692	-0.223847	480
0.308744	-0.249333	480
0.388849	-0.317072	480
0.218418	-0.295171	480
0.162663	-0.369602	480
0.357071	0.00343288	720
0.247916	0.112595	720
0.294878	0.0639508	720
0.295765	0.0330938	720
0.195702	0.0538759	720
0.209014	0.028455	720
0.299474	-0.0150733	720
0.272697	-0.00992159	720
0.277167	-0.0405964	720
0.310108	-0.0575956	720
0.29608	-0.0574737	720
0.369504	-0.129354	720
0.305172	-0.0751879	720
0.373876	-0.150319	720
0.300662	-0.0859139	720
0.221513	-0.0244099	720
0.249491	-0.0470727	720
0.21164	-0.0282859	720
0.185034	-0.0261082	720
0.270432	-0.113127	720
0.197783	-0.0419372	720
0.293992	-0.145655	720
0.223049	-0.084882	720
0.161061	-0.0171535	720
0.343686	-0.198082	720
0.256542	-0.109544	720
0.171524	-0.0360216	720
0.324294	-0.209938	720
0.303294	-0.192378	720
0.222367	-0.124471	720
0.247115	-0.179556	720
0.260717	-0.199423	720
0.253915	0.12539	960
0.289372	0.0853208	960
0.248649	0.0789616	960
0.187323	0.137772	960
0.186201	0.110701	960
0.232906	0.0362592	960
0.173769	0.061397	960
0.049493	0.0200579	960
0.348193	-0.0261081	960
0.300565	-0.0156047	960
0.223028	-0.00135693	960
0.297447	-0.0628398	960
0.217253	-0.0128308	960
0.297702	-0.0940922	960
0.308612	-0.132876	960
0.25673	-0.0929242	960
0.273616	-0.120406	960
0.320775	-0.213674	960
0.242495	-0.112402	960
0.28549	-0.206683	960
0.358683	-0.306916	960
0.338335	-0.307251	960
0.313885	-0.296765	960
0.283687	-0.27064	960
0.249571	-0.293407	960
0.217404	0.177576	1200
0.238961	0.149316	1200
0.226246	0.151083	1200
0.113654	0.23293	1200
0.130371	0.179963	1200
0.266789	0.0184545	1200
0.228406	0.0171561	1200
0.216573	0.0124208	1200
0.0334561	0.0232185	1200
0.31231	-0.056867	1200
0.25458	-0.00410304	1200
0.277828	-0.0441632	1200
0.29857	-0.069316	1200
0.313264	-0.124168	1200
0.203446	-0.0385637	1200
0.258127	-0.0999038	1200
0.346438	-0.163152	1200
0.331722	-0.231357	1200
0.213423	-0.183034	1200
0.372222	-0.336746	1200
0.245045	0.164956	1440
0.348256	0.0761118	1440
0.15323	0.140304	1440
0.181358	0.0641725	1440
0.229399	0.0050464	1440
0.168569	0.0242846	1440
0.0554093	0.0979988	1440
0.0717641	0.054331	1440
0.312166	-0.0409193	1440
0.365981	-0.0993963	1440
0.286787	-0.0513712	1440
0.347286	-0.120774	1440
0.384869	-0.156304	1440
0.33589	-0.163608	1440
0.291122	-0.142894	1440
0.393031	-0.296335	1440
0.334981	-0.287065	1440
0.267198	-0.248051	1440
0.29816	-0.298042	1440
0.367768	-0.366971	1440
0.250604	-0.371818	1440
-0.0387405	0.0725352	1440
0.315083	0.174074	-1920
0.347588	0.102292	-1920
0.341988	0.0842917	-1920
0.223009	0.143986	-1920
0.0870315	0.0271934	-1920
0.374813	-0.175582	-1920
0.350086	-0.155262	-1920
0.278894	-0.107315	-1920
0.313878	-0.211627	-1920
0.297315	-0.208341	-1920
0.303325	-0.235478	-1920
0.224997	0.168875	-1680
0.136988	0.0957489	-1680
0.339589	-0.145827	-1680
0.190146	-0.0189428	-1680
0.116681	-0.0201217	-1680
0.0548596	-0.00295731	-1680
0.33846	-0.322437	-1680
0.243469	0.311663	-1440
0.135217	0.321425	-1440
0.208035	0.0174101	-1440
0.258585	-0.0280924	-1440
0.163181	-0.0768214	-1440
0.113798	-0.085069	-1440
0.121274	-0.327156	-1440
0.227186	0.188933	-1200
0.107798	0.105579	-1200
0.147642	0.0182292	-1200
0.28469	-0.0449433	-1200
0.29258	-0.174057	-1200
0.232889	-0.155862	-1200
0.340782	-0.365664	-1200
0.28424	-0.307913	-1200
0.240483	0.347277	-960
0.223768	0.310788	-960
0.171447	0.286087	-960
0.0899082	0.0470362	-960
0.0601727	0.0307896	-960
0.0454746	0.0107259	-960
0.0257501	0.0184128	-960
0.294178	-0.00996907	-960
0.316002	-0.049963	-960
0.260618	-0.0442808	-960
0.193807	-0.0326138	-960
0.200879	-0.0867964	-960
0.296046	-0.213847	-960
0.161287	-0.122815	-960
-0.220398	-0.167606	-960
0.26996	0.0664504	-720
0.200657	0.0192478	-720
0.281751	-0.0493398	-720
0.194906	-0.0212712	-720
0.288457	-0.150045	-720
0.130099	-0.0727289	-720
0.281912	0.161828	-480
0.139699	0.078614	-480
0.0415558	0.0258136	-480
0.251024	-0.0954374	-480
0.119521	-0.0328254	-480
0.306634	-0.235354	-480
0.210081	-0.330229	-480
-0.0489288	-0.0786287	-480
0.119339	0.062084	-240
0.212807	-0.0129841	-240
0.425128	-0.275843	-240
0.249575	-0.160858	-240
0.257001	-0.169517	-240
0.00872209	-0.0254536	-240
0.338098	-0.452087	-240
-0.0942166	-0.0345039	-240
-0.144284	-0.0863854	-240
0.318592	0.239092	0
0.253218	0.265328	0
0.336011	0.038323	0
0.200743	0.187281	0
0.202277	-0.119899	0
0.221862	-0.284532	0
0.35969	0.158139	240
0.372379	0.135766	240
0.334848	0.110453	240
0.275648	0.109911	240
0.136979	0.170637	240
0.333615	-0.136792	240
0.210716	-0.0916901	240
0.298935	-0.216324	240
0.298738	0.0102107	480
0.278669	-0.0383216	480
0.276317	-0.0576173	480
0.230328	-0.0252162	480
0.153023	-0.0396938	480
0.225587	-0.122034	480
0.0703198	-0.000840284	480
0.156093	-0.0961239	480
0.242964	-0.175766	480
0.311272	-0.250605	480
0.250826	-0.197675	480
0.247509	0.112663	720
0.294399	0.0643301	720
0.298863	-0.0146102	720
0.304948	-0.0749441	720
0.220548	-0.0242636	720
0.270019	-0.113452	720
0.183859	-0.0265794	720
0.29348	-0.146272	720
0.323467	-0.210515	720
0.246977	-0.179783	720
0.259673	-0.200138	720
0.25364	0.129648	960
0.247472	0.0824073	960
0.296827	-0.0943756	960
0.25545	-0.0891969	960
0.242247	-0.112686	960
0.337509	-0.306143	960
0.249083	-0.292101	960
0.347571	0.0764404	1440
0.228575	0.00517208	1440
0.167968	0.024652	1440
0.0546624	0.0984242	1440
0.0722261	0.0544664	1440
0.384484	-0.155899	1440
0.392131	-0.29593	1440
0.33214	-0.287556	1440
