# Supplementary material for: Spinal premotor interneurons controlling antagonistic muscles are spatially intermingled
Source: eLife. 2022 Dec 13;11:e81976. doi: 10.7554/eLife.81976 (PMC9844990; doi:10.7554/eLife.81976)
Supplement: Figure 12—source data 1. [file elife-81976-fig12-data1.xlsx]

## Sheet: Sheet1
LG_ChAT_high	TA_ChAT_high	LG_ChAT_low	TA_ChAT_low	GS_Olig2	TA_Olig2	GS_AAV-G_WT	TA_AAV-G_WT	GS_AAV-G-FLEX_ChAT	TA_AAV-G-FLEX_ChAT	GS_PRV	TA_PRV
328.81	312.44	321.89	332.1	316.85	317.86	328.1	348.6	403.36	348.02	317.53	345.63
330.31	345.67	340.61	365.17	304.7	309.81	303.15	294.32	383.44	366.7	349.43	356.1
322.43	363.1	344.45	340.96	286.27	291.84	248.64		350.66	349.63	356.61	376.27
316.04	342.75	260.94	296.32	282.67		237.26		382.36		377.61	383.43
350.7	297.58	307.09	305.23
365.09	276.38	310.88	312.38
330.75	314.8	320.94
285.45
267
294.1
352.39
