# Supplementary material for: Spinal premotor interneurons controlling antagonistic muscles are spatially intermingled
Source: eLife. 2022 Dec 13;11:e81976. doi: 10.7554/eLife.81976 (PMC9844990; doi:10.7554/eLife.81976)
Supplement: Figure 13—source data 1. [file elife-81976-fig13-data1.xlsx]

## Sheet: Sheet1
ID	Section	n	area	mean	min	max	Xpos	Ypos	perim	feret	chan	feretx	ferety	ferang	minfer		count
443ChAT_ChATcreTdTOM_211020	1	1	0	248	248	248	1034.86	733.872	0	0	2	4930	6952	0	0	0	1
443ChAT_ChATcreTdTOM_211020	1	2	0	105	105	105	1430.45	825.792	0	0	2	5547.5	9609.5	0	0	1	2
443ChAT_ChATcreTdTOM_211020	1	3	0	37	37	37	1391.16	874.022	0	0	2	5871.5	9345.5	0	0	1	2
443ChAT_ChATcreTdTOM_211020	1	4	0	36	36	36	927.611	584.641	0	0	1	3927.5	6231.5	0	0	2	10
443ChAT_ChATcreTdTOM_211020	1	5	0	13	13	13	878.785	677.529	0	0	1	4551.5	5903.5	0	0	2	10
443ChAT_ChATcreTdTOM_211020	1	6	0	14	14	14	788.279	737.072	0	0	1	4951.5	5295.5	0	0	2	10
443ChAT_ChATcreTdTOM_211020	1	7	0	50	50	50	1083.61	731.118	0	0	1	4911.5	7279.5	0	0	2	10
443ChAT_ChATcreTdTOM_211020	1	8	0	24	24	24	525.396	1004.12	0	0	1	6745.5	3529.5	0	0	2	10
443ChAT_ChATcreTdTOM_211020	1	9	0	45	45	45	662.047	1242	0	0	2	8343.5	4447.5	0	0	2	10
443ChAT_ChATcreTdTOM_211020	1	10	0	26	26	26	1490.3	1168.17	0	0	1	7847.5	10011.5	0	0	2	10
443ChAT_ChATcreTdTOM_211020	1	11	0	41	41	41	1223.69	727.545	0	0	1	4887.5	8220.5	0	0	2	10
443ChAT_ChATcreTdTOM_211020	1	12	0	41	41	41	1310.33	677.082	0	0	1	4548.5	8802.5	0	0	2	10
443ChAT_ChATcreTdTOM_211020	1	13	0	15	15	15	1332.65	615.008	0	0	1	4131.5	8952.5	0	0	2	10
443ChAT_ChATcreTdTOM_211020	1	14	0	17	17	17	1619.5	271.443	0	0	1	1823.5	10879.5	0	0	3	49
443ChAT_ChATcreTdTOM_211020	1	15	0	60	60	60	1633.8	372.667	0	0	1	2503.5	10975.5	0	0	3	49
443ChAT_ChATcreTdTOM_211020	1	16	0	54	54	54	1692.15	366.713	0	0	1	2463.5	11367.5	0	0	3	49
443ChAT_ChATcreTdTOM_211020	1	17	0	44	44	44	1569.49	369.094	0	0	1	2479.5	10543.5	0	0	3	49
443ChAT_ChATcreTdTOM_211020	1	18	0	66	66	66	1551.62	408.393	0	0	1	2743.5	10423.5	0	0	3	49
443ChAT_ChATcreTdTOM_211020	1	19	0	65	65	65	1482.56	426.256	0	0	1	2863.5	9959.5	0	0	3	49
443ChAT_ChATcreTdTOM_211020	1	20	0	70	70	70	1459.93	457.218	0	0	1	3071.5	9807.5	0	0	3	49
443ChAT_ChATcreTdTOM_211020	1	21	0	27	27	27	1540.91	428.638	0	0	1	2879.5	10351.5	0	0	3	49
443ChAT_ChATcreTdTOM_211020	1	22	0	57	57	57	1552.82	466.745	0	0	1	3135.5	10431.5	0	0	3	49
443ChAT_ChATcreTdTOM_211020	1	23	0	54	54	54	1567.11	502.471	0	0	1	3375.5	10527.5	0	0	3	49
443ChAT_ChATcreTdTOM_211020	1	24	0	50	50	50	1613.55	510.807	0	0	1	3431.5	10839.5	0	0	3	49
443ChAT_ChATcreTdTOM_211020	1	25	0	45	45	45	1496.85	528.67	0	0	1	3551.5	10055.5	0	0	3	49
443ChAT_ChATcreTdTOM_211020	1	26	0	60	60	60	1468.26	569.16	0	0	1	3823.5	9863.5	0	0	3	49
443ChAT_ChATcreTdTOM_211020	1	27	0	71	71	71	1542.1	614.413	0	0	1	4127.5	10359.5	0	0	3	49
443ChAT_ChATcreTdTOM_211020	1	28	0	47	47	47	1570.68	659.666	0	0	1	4431.5	10551.5	0	0	3	49
443ChAT_ChATcreTdTOM_211020	1	29	0	65	65	65	1518.28	675.147	0	0	1	4535.5	10199.5	0	0	3	49
443ChAT_ChATcreTdTOM_211020	1	30	0	33	33	33	1537.34	701.346	0	0	1	4711.5	10327.5	0	0	3	49
443ChAT_ChATcreTdTOM_211020	1	31	0	59	59	59	1546.86	728.736	0	0	1	4895.5	10391.5	0	0	3	49
443ChAT_ChATcreTdTOM_211020	1	32	0	103	103	103	1249.14	419.111	0	0	1	2815.5	8391.5	0	0	3	49
443ChAT_ChATcreTdTOM_211020	1	33	0	20	20	20	1534.95	925.229	0	0	1	6215.5	10311.5	0	0	3	49
443ChAT_ChATcreTdTOM_211020	1	34	0	33	33	33	995.49	780.539	0	0	1	5243.5	6687.5	0	0	3	49
443ChAT_ChATcreTdTOM_211020	1	35	0	16	16	16	974.055	805.547	0	0	1	5411.5	6543.5	0	0	3	49
443ChAT_ChATcreTdTOM_211020	1	36	0	40	40	40	1086.59	751.958	0	0	1	5051.5	7299.5	0	0	3	49
443ChAT_ChATcreTdTOM_211020	1	37	0	8	8	8	807.929	410.775	0	0	1	2759.5	5427.5	0	0	3	49
443ChAT_ChATcreTdTOM_211020	1	38	0	36	36	36	888.312	491.158	0	0	1	3299.5	5967.5	0	0	3	49
443ChAT_ChATcreTdTOM_211020	1	39	0	98	98	98	553.679	396.484	0	0	1	2663.5	3719.5	0	0	3	49
443ChAT_ChATcreTdTOM_211020	1	40	0	84	84	84	560.824	433.996	0	0	1	2915.5	3767.5	0	0	3	49
443ChAT_ChATcreTdTOM_211020	1	41	0	81	81	81	466.15	339.323	0	0	1	2279.5	3131.5	0	0	3	49
443ChAT_ChATcreTdTOM_211020	1	42	0	80	80	80	417.92	403.629	0	0	1	2711.5	2807.5	0	0	3	49
443ChAT_ChATcreTdTOM_211020	1	43	0	40	40	40	339.323	344.681	0	0	1	2315.5	2279.5	0	0	3	49
443ChAT_ChATcreTdTOM_211020	1	44	0	29	29	29	346.468	310.742	0	0	1	2087.5	2327.5	0	0	3	49
443ChAT_ChATcreTdTOM_211020	1	45	0	57	57	57	475.081	546.533	0	0	1	3671.5	3191.5	0	0	3	49
443ChAT_ChATcreTdTOM_211020	1	46	0	55	55	55	571.542	601.909	0	0	1	4043.5	3839.5	0	0	3	49
443ChAT_ChATcreTdTOM_211020	1	47	0	84	84	84	485.799	675.147	0	0	1	4535.5	3263.5	0	0	3	49
443ChAT_ChATcreTdTOM_211020	1	48	0	15	15	15	494.731	626.917	0	0	1	4211.5	3323.5	0	0	3	49
443ChAT_ChATcreTdTOM_211020	1	49	0	88	88	88	444.714	660.857	0	0	1	4439.5	2987.5	0	0	3	49
443ChAT_ChATcreTdTOM_211020	1	50	0	47	47	47	385.766	617.985	0	0	1	4151.5	2591.5	0	0	3	49
443ChAT_ChATcreTdTOM_211020	1	51	0	82	82	82	512.594	755.531	0	0	1	5075.5	3443.5	0	0	3	49
443ChAT_ChATcreTdTOM_211020	1	52	0	34	34	34	528.67	714.446	0	0	1	4799.5	3551.5	0	0	3	49
443ChAT_ChATcreTdTOM_211020	1	53	0	79	79	79	548.32	753.744	0	0	1	5063.5	3683.5	0	0	3	49
443ChAT_ChATcreTdTOM_211020	1	54	0	34	34	34	575.114	712.659	0	0	1	4787.5	3863.5	0	0	3	49
443ChAT_ChATcreTdTOM_211020	1	55	0	61	61	61	467.936	743.026	0	0	1	4991.5	3143.5	0	0	3	49
443ChAT_ChATcreTdTOM_211020	1	56	0	74	74	74	403.629	723.377	0	0	1	4859.5	2711.5	0	0	3	49
443ChAT_ChATcreTdTOM_211020	1	57	0	11	11	11	521.525	978.818	0	0	1	6575.5	3503.5	0	0	3	49
443ChAT_ChATcreTdTOM_211020	1	58	0	14	14	14	505.448	946.665	0	0	1	6359.5	3395.5	0	0	3	49
443ChAT_ChATcreTdTOM_211020	1	59	0	21	21	21	923.889	683.036	0	0	1	4588.5	6206.5	0	0	3	49
443ChAT_ChATcreTdTOM_211020	1	60	0	20	20	20	1580.21	1039.55	0	0	1	6983.5	10615.5	0	0	3	49
443ChAT_ChATcreTdTOM_211020	1	61	0	9	9	9	1512.92	1090.76	0	0	1	7327.5	10163.5	0	0	3	49
443ChAT_ChATcreTdTOM_211020	1	62	0	22	22	22	1400.98	1136.01	0	0	1	7631.5	9411.5	0	0	3	49
443ChAT_ChATcreTdTOM_211020	2	1	0	23	23	23	462.755	938.207	0	0	2	3108.69	6302.69	0	0	3	25
443ChAT_ChATcreTdTOM_211020	2	2	0	3	3	3	911.559	617.032	0	0	2	6123.67	4145.09	0	0	0	1
443ChAT_ChATcreTdTOM_211020	2	3	0	12	12	12	1231.28	513.338	0	0	2	8271.5	3448.5	0	0	1	3				911.559	617.032
443ChAT_ChATcreTdTOM_211020	2	4	0	31	31	31	1316.43	568.118	0	0	2	8843.5	3816.5	0	0	1	3
443ChAT_ChATcreTdTOM_211020	2	5	0	15	15	15	939.966	586.279	0	0	2	6314.5	3938.5	0	0	1	3
443ChAT_ChATcreTdTOM_211020	2	6	0	10	10	10	587.172	691.224	0	0	1	3944.5	4643.5	0	0	2	6
443ChAT_ChATcreTdTOM_211020	2	7	0	10	10	10	703.728	628.703	0	0	1	4727.5	4223.5	0	0	2	6
443ChAT_ChATcreTdTOM_211020	2	8	0	15	15	15	738.561	646.12	0	0	2	4961.5	4340.5	0	0	2	6
443ChAT_ChATcreTdTOM_211020	2	9	0	38	38	38	837.7	636.146	0	0	1	5627.5	4273.5	0	0	2	6
443ChAT_ChATcreTdTOM_211020	2	10	0	9	9	9	1179.48	768.928	0	0	2	7923.5	5165.5	0	0	2	6
443ChAT_ChATcreTdTOM_211020	2	11	0	42	42	42	452.455	197.609	0	0	1	3039.5	1327.5	0	0	2	6
443ChAT_ChATcreTdTOM_211020	2	12	0	54	54	54	392.912	999.658	0	0	1	2639.5	6715.5	0	0	3	25
443ChAT_ChATcreTdTOM_211020	2	13	0	20	20	20	410.775	1033.6	0	0	1	2759.5	6943.5	0	0	3	25
443ChAT_ChATcreTdTOM_211020	2	14	0	68	68	68	432.21	972.864	0	0	1	2903.5	6535.5	0	0	3	25
443ChAT_ChATcreTdTOM_211020	2	15	0	57	57	57	416.133	921.061	0	0	1	2795.5	6187.5	0	0	3	25
443ChAT_ChATcreTdTOM_211020	2	16	0	10	10	10	413.454	896.946	0	0	1	2777.5	6025.5	0	0	3	25
443ChAT_ChATcreTdTOM_211020	2	17	0	21	21	21	426.851	863.899	0	0	1	2867.5	5803.5	0	0	3	25
443ChAT_ChATcreTdTOM_211020	2	18	0	75	75	75	455.432	877.297	0	0	1	3059.5	5893.5	0	0	3	25
443ChAT_ChATcreTdTOM_211020	2	19	0	44	44	44	452.753	896.053	0	0	1	3041.5	6019.5	0	0	3	25
443ChAT_ChATcreTdTOM_211020	2	20	0	54	54	54	481.333	904.091	0	0	1	3233.5	6073.5	0	0	3	25
443ChAT_ChATcreTdTOM_211020	2	21	0	43	43	43	743.026	913.023	0	0	1	4991.5	6133.5	0	0	3	25
443ChAT_ChATcreTdTOM_211020	2	22	0	20	20	20	526.289	684.376	0	0	1	3535.5	4597.5	0	0	3	25
443ChAT_ChATcreTdTOM_211020	2	23	0	24	24	24	844.25	552.19	0	0	1	5671.5	3709.5	0	0	3	25
443ChAT_ChATcreTdTOM_211020	2	24	0	64	64	64	1153.43	927.313	0	0	1	7748.5	6229.5	0	0	3	25
443ChAT_ChATcreTdTOM_211020	2	25	0	67	67	67	1187.37	920.168	0	0	1	7976.5	6181.5	0	0	3	25
443ChAT_ChATcreTdTOM_211020	2	26	0	49	49	49	1198.09	939.817	0	0	1	8048.5	6313.5	0	0	3	25
443ChAT_ChATcreTdTOM_211020	2	27	0	54	54	54	1188.71	958.127	0	0	1	7985.5	6436.5	0	0	3	25
443ChAT_ChATcreTdTOM_211020	2	28	0	11	11	11	1521.85	933.565	0	0	1	10223.5	6271.5	0	0	3	25
443ChAT_ChATcreTdTOM_211020	2	29	0	55	55	55	1465.88	909.152	0	0	1	9847.5	6107.5	0	0	3	25
443ChAT_ChATcreTdTOM_211020	2	30	0	58	58	58	1428.37	876.999	0	0	1	9595.5	5891.5	0	0	3	25
443ChAT_ChATcreTdTOM_211020	2	31	0	20	20	20	1448.62	931.183	0	0	1	9731.5	6255.5	0	0	3	25
443ChAT_ChATcreTdTOM_211020	2	32	0	15	15	15	1372.4	832.341	0	0	1	9219.5	5591.5	0	0	3	25
443ChAT_ChATcreTdTOM_211020	2	33	0	19	19	19	1349.47	330.838	0	0	1	9065.5	2222.5	0	0	3	25
443ChAT_ChATcreTdTOM_211020	2	34	0	7	7	7	1269.54	315.654	0	0	1	8528.5	2120.5	0	0	3	25
443ChAT_ChATcreTdTOM_211020	2	35	0	48	48	48	1175.76	269.657	0	0	1	7898.5	1811.5	0	0	3	25
443ChAT_ChATcreTdTOM_211020	3	1	0	19	19	19	226.786	436.676	0	0	2	1523.5	2933.5	0	0	3	26
443ChAT_ChATcreTdTOM_211020	3	2	0	20	20	20	616.497	256.26	0	0	2	4141.5	1721.5	0	0	1	5
443ChAT_ChATcreTdTOM_211020	3	3	0	17	17	17	658.475	284.84	0	0	2	4423.5	1913.5	0	0	1	5
443ChAT_ChATcreTdTOM_211020	3	4	0	13	13	13	470.02	292.333	0	0	2	3157.5	1963.83	0	0	1	5
443ChAT_ChATcreTdTOM_211020	3	5	0	12	12	12	494.83	281.218	0	0	2	3324.17	1889.17	0	0	1	5
443ChAT_ChATcreTdTOM_211020	3	6	0	18	18	18	258.244	325.776	0	0	2	1734.83	2188.5	0	0	1	5
443ChAT_ChATcreTdTOM_211020	3	7	0	21	21	21	263.107	343.639	0	0	1	1767.5	2308.5	0	0	2	7
443ChAT_ChATcreTdTOM_211020	3	8	0	11	11	11	293.077	346.617	0	0	1	1968.83	2328.5	0	0	2	7
443ChAT_ChATcreTdTOM_211020	3	9	0	26	26	26	369.491	320.418	0	0	1	2482.17	2152.5	0	0	2	7
443ChAT_ChATcreTdTOM_211020	3	10	0	11	11	11	351.43	313.471	0	0	1	2360.83	2105.83	0	0	2	7
443ChAT_ChATcreTdTOM_211020	3	11	0	29	29	29	420.103	317.639	0	0	1	2822.17	2133.83	0	0	2	7
443ChAT_ChATcreTdTOM_211020	3	12	0	51	51	51	225.297	99.214	0	0	1	1513.5	666.5	0	0	2	7
443ChAT_ChATcreTdTOM_211020	3	13	0	31	31	31	238.595	94.054	0	0	1	1602.83	631.833	0	0	2	7
443ChAT_ChATcreTdTOM_211020	3	14	0	10	10	10	455.631	306.127	0	0	2	3060.83	2056.5	0	0	0	1
443ChAT_ChATcreTdTOM_211020	3	15	0	58	58	58	240.481	452.455	0	0	1	1615.5	3039.5	0	0	3	26
443ChAT_ChATcreTdTOM_211020	3	16	0	44	44	44	225.297	449.18	0	0	1	1513.5	3017.5	0	0	3	26
443ChAT_ChATcreTdTOM_211020	3	17	0	66	66	66	233.038	470.616	0	0	1	1565.5	3161.5	0	0	3	26
443ChAT_ChATcreTdTOM_211020	3	18	0	25	25	25	213.091	432.21	0	0	1	1431.5	2903.5	0	0	3	26
443ChAT_ChATcreTdTOM_211020	3	19	0	18	18	18	208.03	450.371	0	0	1	1397.5	3025.5	0	0	3	26
443ChAT_ChATcreTdTOM_211020	3	20	0	51	51	51	208.923	461.386	0	0	1	1403.5	3099.5	0	0	3	26
443ChAT_ChATcreTdTOM_211020	3	21	0	69	69	69	215.472	488.776	0	0	1	1447.5	3283.5	0	0	3	26
443ChAT_ChATcreTdTOM_211020	3	22	0	62	62	62	196.121	498.899	0	0	1	1317.5	3351.5	0	0	3	26
443ChAT_ChATcreTdTOM_211020	3	23	0	15	15	15	204.457	516.464	0	0	1	1373.5	3469.5	0	0	3	26
443ChAT_ChATcreTdTOM_211020	3	24	0	12	12	12	370.434	455.134	0	0	2	2488.5	3057.5	0	0	3	26
443ChAT_ChATcreTdTOM_211020	3	25	0	16	16	16	594.168	460.642	0	0	2	3991.5	3094.5	0	0	3	26
443ChAT_ChATcreTdTOM_211020	3	26	0	17	17	17	599.527	468.68	0	0	2	4027.5	3148.5	0	0	3	26
443ChAT_ChATcreTdTOM_211020	3	27	0	11	11	11	592.977	479.696	0	0	2	3983.5	3222.5	0	0	3	26
443ChAT_ChATcreTdTOM_211020	3	28	0	12	12	12	578.091	464.81	0	0	2	3883.5	3122.5	0	0	3	26
443ChAT_ChATcreTdTOM_211020	3	29	0	31	31	31	686.46	415.091	0	0	2	4611.5	2788.5	0	0	3	26
443ChAT_ChATcreTdTOM_211020	3	30	0	10	10	10	713.85	438.016	0	0	2	4795.5	2942.5	0	0	3	26
443ChAT_ChATcreTdTOM_211020	3	31	0	10	10	10	733.202	454.092	0	0	2	4925.5	3050.5	0	0	3	26
443ChAT_ChATcreTdTOM_211020	3	32	0	13	13	13	723.079	467.192	0	0	2	4857.5	3138.5	0	0	3	26
443ChAT_ChATcreTdTOM_211020	3	33	0	17	17	17	760.79	466.696	0	0	2	5110.83	3135.17	0	0	3	26
443ChAT_ChATcreTdTOM_211020	3	34	0	30	30	30	743.324	479.597	0	0	2	4993.5	3221.83	0	0	3	26
443ChAT_ChATcreTdTOM_211020	3	35	0	23	23	23	420.599	275.909	0	0	1	2825.5	1853.5	0	0	3	26
443ChAT_ChATcreTdTOM_211020	3	36	0	48	48	48	467.49	260.725	0	0	1	3140.5	1751.5	0	0	3	26
443ChAT_ChATcreTdTOM_211020	3	37	0	12	12	12	674.7	166.051	0	0	2	4532.5	1115.5	0	0	3	26
443ChAT_ChATcreTdTOM_211020	3	38	0	38	38	38	587.172	133.303	0	0	2	3944.5	895.5	0	0	3	26
443ChAT_ChATcreTdTOM_211020	3	39	0	16	16	16	619.027	141.639	0	0	2	4158.5	951.5	0	0	3	26
443ChAT_ChATcreTdTOM_211020	4	1	0	19	19	19	226.786	436.676	0	0	2	1523.5	2933.5	0	0	3	26
443ChAT_ChATcreTdTOM_211020	4	2	0	20	20	20	616.497	256.26	0	0	2	4141.5	1721.5	0	0	1	5
443ChAT_ChATcreTdTOM_211020	4	3	0	17	17	17	658.475	284.84	0	0	2	4423.5	1913.5	0	0	1	5
443ChAT_ChATcreTdTOM_211020	4	4	0	13	13	13	470.02	292.333	0	0	2	3157.5	1963.83	0	0	1	5
443ChAT_ChATcreTdTOM_211020	4	5	0	12	12	12	494.83	281.218	0	0	2	3324.17	1889.17	0	0	1	5
443ChAT_ChATcreTdTOM_211020	4	6	0	18	18	18	258.244	325.776	0	0	2	1734.83	2188.5	0	0	1	5
443ChAT_ChATcreTdTOM_211020	4	7	0	21	21	21	263.107	343.639	0	0	1	1767.5	2308.5	0	0	2	7
443ChAT_ChATcreTdTOM_211020	4	8	0	11	11	11	293.077	346.617	0	0	1	1968.83	2328.5	0	0	2	7
443ChAT_ChATcreTdTOM_211020	4	9	0	26	26	26	369.491	320.418	0	0	1	2482.17	2152.5	0	0	2	7
443ChAT_ChATcreTdTOM_211020	4	10	0	11	11	11	351.43	313.471	0	0	1	2360.83	2105.83	0	0	2	7
443ChAT_ChATcreTdTOM_211020	4	11	0	29	29	29	420.103	317.639	0	0	1	2822.17	2133.83	0	0	2	7
443ChAT_ChATcreTdTOM_211020	4	12	0	51	51	51	225.297	99.214	0	0	1	1513.5	666.5	0	0	2	7
443ChAT_ChATcreTdTOM_211020	4	13	0	31	31	31	238.595	94.054	0	0	1	1602.83	631.833	0	0	2	7
443ChAT_ChATcreTdTOM_211020	4	14	0	10	10	10	455.631	306.127	0	0	2	3060.83	2056.5	0	0	0	1
443ChAT_ChATcreTdTOM_211020	4	15	0	58	58	58	240.481	452.455	0	0	1	1615.5	3039.5	0	0	3	26
443ChAT_ChATcreTdTOM_211020	4	16	0	44	44	44	225.297	449.18	0	0	1	1513.5	3017.5	0	0	3	26
443ChAT_ChATcreTdTOM_211020	4	17	0	66	66	66	233.038	470.616	0	0	1	1565.5	3161.5	0	0	3	26
443ChAT_ChATcreTdTOM_211020	4	18	0	25	25	25	213.091	432.21	0	0	1	1431.5	2903.5	0	0	3	26
443ChAT_ChATcreTdTOM_211020	4	19	0	18	18	18	208.03	450.371	0	0	1	1397.5	3025.5	0	0	3	26
443ChAT_ChATcreTdTOM_211020	4	20	0	51	51	51	208.923	461.386	0	0	1	1403.5	3099.5	0	0	3	26
443ChAT_ChATcreTdTOM_211020	4	21	0	69	69	69	215.472	488.776	0	0	1	1447.5	3283.5	0	0	3	26
443ChAT_ChATcreTdTOM_211020	4	22	0	62	62	62	196.121	498.899	0	0	1	1317.5	3351.5	0	0	3	26
443ChAT_ChATcreTdTOM_211020	4	23	0	15	15	15	204.457	516.464	0	0	1	1373.5	3469.5	0	0	3	26
443ChAT_ChATcreTdTOM_211020	4	24	0	12	12	12	370.434	455.134	0	0	2	2488.5	3057.5	0	0	3	26
443ChAT_ChATcreTdTOM_211020	4	25	0	16	16	16	594.168	460.642	0	0	2	3991.5	3094.5	0	0	3	26
443ChAT_ChATcreTdTOM_211020	4	26	0	17	17	17	599.527	468.68	0	0	2	4027.5	3148.5	0	0	3	26
443ChAT_ChATcreTdTOM_211020	4	27	0	11	11	11	592.977	479.696	0	0	2	3983.5	3222.5	0	0	3	26
443ChAT_ChATcreTdTOM_211020	4	28	0	12	12	12	578.091	464.81	0	0	2	3883.5	3122.5	0	0	3	26
443ChAT_ChATcreTdTOM_211020	4	29	0	31	31	31	686.46	415.091	0	0	2	4611.5	2788.5	0	0	3	26
443ChAT_ChATcreTdTOM_211020	4	30	0	10	10	10	713.85	438.016	0	0	2	4795.5	2942.5	0	0	3	26
443ChAT_ChATcreTdTOM_211020	4	31	0	10	10	10	733.202	454.092	0	0	2	4925.5	3050.5	0	0	3	26
443ChAT_ChATcreTdTOM_211020	4	32	0	13	13	13	723.079	467.192	0	0	2	4857.5	3138.5	0	0	3	26
443ChAT_ChATcreTdTOM_211020	4	33	0	17	17	17	760.79	466.696	0	0	2	5110.83	3135.17	0	0	3	26
443ChAT_ChATcreTdTOM_211020	4	34	0	30	30	30	743.324	479.597	0	0	2	4993.5	3221.83	0	0	3	26
443ChAT_ChATcreTdTOM_211020	4	35	0	23	23	23	420.599	275.909	0	0	1	2825.5	1853.5	0	0	3	26
443ChAT_ChATcreTdTOM_211020	4	36	0	48	48	48	467.49	260.725	0	0	1	3140.5	1751.5	0	0	3	26
443ChAT_ChATcreTdTOM_211020	4	37	0	12	12	12	674.7	166.051	0	0	2	4532.5	1115.5	0	0	3	26
443ChAT_ChATcreTdTOM_211020	4	38	0	38	38	38	587.172	133.303	0	0	2	3944.5	895.5	0	0	3	26
443ChAT_ChATcreTdTOM_211020	4	39	0	16	16	16	619.027	141.639	0	0	2	4158.5	951.5	0	0	3	26
443ChAT_ChATcreTdTOM_211020	5	1	0	2	2	2	1062.25	733.276	0	0	1	7136	4926	0	0	0	1
443ChAT_ChATcreTdTOM_211020	5	2	0	12	12	12	999.212	579.878	0	0	2	6712.5	3895.5	0	0	1	1
443ChAT_ChATcreTdTOM_211020	5	3	0	17	17	17	621.26	690.331	0	0	1	4173.5	4637.5	0	0	2	13
443ChAT_ChATcreTdTOM_211020	5	4	0	9	9	9	583.748	625.428	0	0	1	3921.5	4201.5	0	0	2	13
443ChAT_ChATcreTdTOM_211020	5	5	0	18	18	18	705.216	646.268	0	0	1	4737.5	4341.5	0	0	2	13
443ChAT_ChATcreTdTOM_211020	5	6	0	18	18	18	865.388	620.665	0	0	1	5813.5	4169.5	0	0	2	13
443ChAT_ChATcreTdTOM_211020	5	7	0	20	20	20	855.861	848.716	0	0	1	5749.5	5701.5	0	0	2	13
443ChAT_ChATcreTdTOM_211020	5	8	0	24	24	24	887.717	731.862	0	0	1	5963.5	4916.5	0	0	2	13
443ChAT_ChATcreTdTOM_211020	5	9	0	15	15	15	1121.72	639.57	0	0	2	7535.5	4296.5	0	0	2	13
443ChAT_ChATcreTdTOM_211020	5	10	0	31	31	31	1071.71	652.669	0	0	1	7199.5	4384.5	0	0	2	13
443ChAT_ChATcreTdTOM_211020	5	11	0	13	13	13	1216.4	815.223	0	0	2	8171.5	5476.5	0	0	2	13
443ChAT_ChATcreTdTOM_211020	5	12	0	117	117	117	1482.7	314.314	0	0	1	9960.5	2111.5	0	0	2	13
443ChAT_ChATcreTdTOM_211020	5	13	0	121	121	121	1431.35	288.86	0	0	1	9615.5	1940.5	0	0	2	13
443ChAT_ChATcreTdTOM_211020	5	14	0	6	6	6	651.33	247.626	0	0	1	4375.5	1663.5	0	0	2	13
443ChAT_ChATcreTdTOM_211020	5	15	0	84	84	84	566.778	390.53	0	0	1	3807.5	2623.5	0	0	2	13
443ChAT_ChATcreTdTOM_211020	5	16	0	64	64	64	858.243	1009.04	0	0	1	5765.5	6778.5	0	0	3	17
443ChAT_ChATcreTdTOM_211020	5	17	0	19	19	19	801.081	1072.45	0	0	1	5381.5	7204.5	0	0	3	17
443ChAT_ChATcreTdTOM_211020	5	18	0	9	9	9	786.791	1035.83	0	0	1	5285.5	6958.5	0	0	3	17
443ChAT_ChATcreTdTOM_211020	5	19	0	69	69	69	787.684	991.173	0	0	1	5291.5	6658.5	0	0	3	17
443ChAT_ChATcreTdTOM_211020	5	20	0	70	70	70	776.073	949.195	0	0	1	5213.5	6376.5	0	0	3	17
443ChAT_ChATcreTdTOM_211020	5	21	0	11	11	11	606.374	1004.57	0	0	1	4073.5	6748.5	0	0	3	17
443ChAT_ChATcreTdTOM_211020	5	22	0	24	24	24	627.81	980.455	0	0	1	4217.5	6586.5	0	0	3	17
443ChAT_ChATcreTdTOM_211020	5	23	0	55	55	55	561.717	953.661	0	0	1	3773.5	6406.5	0	0	3	17
443ChAT_ChATcreTdTOM_211020	5	24	0	53	53	53	583.153	1007.25	0	0	1	3917.5	6766.5	0	0	3	17
443ChAT_ChATcreTdTOM_211020	5	25	0	29	29	29	598.336	1042.08	0	0	1	4019.5	7000.5	0	0	3	17
443ChAT_ChATcreTdTOM_211020	5	26	0	22	22	22	564.396	1023.33	0	0	1	3791.5	6874.5	0	0	3	17
443ChAT_ChATcreTdTOM_211020	5	27	0	16	16	16	980.604	675.891	0	0	1	6587.5	4540.5	0	0	3	17
443ChAT_ChATcreTdTOM_211020	5	28	0	28	28	28	982.391	659.219	0	0	1	6599.5	4428.5	0	0	3	17
443ChAT_ChATcreTdTOM_211020	5	29	0	19	19	19	1093.74	684.227	0	0	1	7347.5	4596.5	0	0	3	17
443ChAT_ChATcreTdTOM_211020	5	30	0	24	24	24	1153.88	580.027	0	0	1	7751.5	3896.5	0	0	3	17
443ChAT_ChATcreTdTOM_211020	5	31	0	17	17	17	1559.37	759.55	0	0	1	10475.5	5102.5	0	0	3	17
443ChAT_ChATcreTdTOM_211020	5	32	0	35	35	35	1372.4	610.096	0	0	1	9219.5	4098.5	0	0	3	17

## Sheet: Sheet2
ID	File	Section	n	area	mean	min	max	Xpos	Ypos	perim	feret	chan	feretx	ferety	ferang	minfer	Label	count	Xscaled	Yscaled
443ChAT_ChATcreTdTOM_211020	443_good_Section1_ChAT_ChATcreTdTOM_211020	1	1	0	14	14	14	755.531	671.574	0	0	2	5075.5	4511.5	0	0	1	4	-280.449	-60.735
443ChAT_ChATcreTdTOM_211020	443_good_Section1_ChAT_ChATcreTdTOM_211020	1	2	0	20	20	20	1423.01	630.49	0	0	2	9559.5	4235.5	0	0	1	4	387.031	-101.819
443ChAT_ChATcreTdTOM_211020	443_good_Section1_ChAT_ChATcreTdTOM_211020	1	3	0	8	8	8	1386.09	581.664	0	0	2	9311.5	3907.5	0	0	1	4	350.114	-150.645
443ChAT_ChATcreTdTOM_211020	443_good_Section1_ChAT_ChATcreTdTOM_211020	1	4	0	16	16	16	1268.2	662.643	0	0	2	8519.5	4451.5	0	0	1	4	232.219	-69.666
443ChAT_ChATcreTdTOM_211020	443_good_Section1_ChAT_ChATcreTdTOM_211020	1	5	0	13	13	13	1035.98	732.309	0	0	2	6959.5	4919.5	0	0	0	1	0	0
443ChAT_ChATcreTdTOM_211020	443_good_Section1_ChAT_ChATcreTdTOM_211020	1	6	0	9	9	9	878.339	795.573	0	0	1	5900.5	5344.5	0	0	2	12	-157.641	63.264
443ChAT_ChATcreTdTOM_211020	443_good_Section1_ChAT_ChATcreTdTOM_211020	1	7	0	21	21	21	789.024	734.393	0	0	2	5300.5	4933.5	0	0	2	12	-246.956	2.084
443ChAT_ChATcreTdTOM_211020	443_good_Section1_ChAT_ChATcreTdTOM_211020	1	8	0	22	22	22	1084.81	741.836	0	0	1	7287.5	4983.5	0	0	2	12	48.825	9.527
443ChAT_ChATcreTdTOM_211020	443_good_Section1_ChAT_ChATcreTdTOM_211020	1	9	0	17	17	17	655.944	567.076	0	0	1	4406.5	3809.5	0	0	2	12	-380.036	-165.233
443ChAT_ChATcreTdTOM_211020	443_good_Section1_ChAT_ChATcreTdTOM_211020	1	10	0	21	21	21	513.04	484.311	0	0	1	3446.5	3253.5	0	0	2	12	-522.94	-247.998
443ChAT_ChATcreTdTOM_211020	443_good_Section1_ChAT_ChATcreTdTOM_211020	1	11	0	71	71	71	641.058	243.756	0	0	1	4306.5	1637.5	0	0	2	12	-394.922	-488.553
443ChAT_ChATcreTdTOM_211020	443_good_Section1_ChAT_ChATcreTdTOM_211020	1	12	0	27	27	27	1222.2	733.499	0	0	1	8210.5	4927.5	0	0	2	12	186.221	1.19
443ChAT_ChATcreTdTOM_211020	443_good_Section1_ChAT_ChATcreTdTOM_211020	1	13	0	11	11	11	1310.92	781.134	0	0	2	8806.5	5247.5	0	0	2	12	274.941	48.825
443ChAT_ChATcreTdTOM_211020	443_good_Section1_ChAT_ChATcreTdTOM_211020	1	14	0	7	7	7	1310.33	679.315	0	0	1	8802.5	4563.5	0	0	2	12	274.346	-52.994
443ChAT_ChATcreTdTOM_211020	443_good_Section1_ChAT_ChATcreTdTOM_211020	1	15	0	8	8	8	1280.11	483.417	0	0	1	8599.5	3247.5	0	0	2	12	244.127	-248.892
443ChAT_ChATcreTdTOM_211020	443_good_Section1_ChAT_ChATcreTdTOM_211020	1	16	0	14	14	14	1296.78	466.745	0	0	1	8711.5	3135.5	0	0	2	12	260.799	-265.564
443ChAT_ChATcreTdTOM_211020	443_good_Section1_ChAT_ChATcreTdTOM_211020	1	17	0	34	34	34	1470.65	280.97	0	0	1	9879.5	1887.5	0	0	2	12	434.666	-451.339
443ChAT_ChATcreTdTOM_211020	443_good_Section1_ChAT_ChATcreTdTOM_211020	1	18	0	26	26	26	1386.09	316.696	0	0	1	9311.5	2127.5	0	0	3	10	350.114	-415.613
443ChAT_ChATcreTdTOM_211020	443_good_Section1_ChAT_ChATcreTdTOM_211020	1	19	0	11	11	11	1498.04	358.376	0	0	1	10063.5	2407.5	0	0	3	10	462.056	-373.933
443ChAT_ChATcreTdTOM_211020	443_good_Section1_ChAT_ChATcreTdTOM_211020	1	20	0	5	5	5	1563.53	401.248	0	0	1	10503.5	2695.5	0	0	3	10	527.554	-331.061
443ChAT_ChATcreTdTOM_211020	443_good_Section1_ChAT_ChATcreTdTOM_211020	1	21	0	14	14	14	1529	531.052	0	0	1	10271.5	3567.5	0	0	3	10	493.018	-201.257
443ChAT_ChATcreTdTOM_211020	443_good_Section1_ChAT_ChATcreTdTOM_211020	1	22	0	32	32	32	1084.81	718.018	0	0	1	7287.5	4823.5	0	0	3	10	48.825	-14.291
443ChAT_ChATcreTdTOM_211020	443_good_Section1_ChAT_ChATcreTdTOM_211020	1	23	0	30	30	30	991.918	689.437	0	0	1	6663.5	4631.5	0	0	3	10	-44.062	-42.872
443ChAT_ChATcreTdTOM_211020	443_good_Section1_ChAT_ChATcreTdTOM_211020	1	24	0	16	16	16	971.673	673.956	0	0	1	6527.5	4527.5	0	0	3	10	-64.307	-58.353
443ChAT_ChATcreTdTOM_211020	443_good_Section1_ChAT_ChATcreTdTOM_211020	1	25	0	2	2	2	809.715	210.114	0	0	1	5439.5	1411.5	0	0	3	10	-226.265	-522.195
443ChAT_ChATcreTdTOM_211020	443_good_Section1_ChAT_ChATcreTdTOM_211020	1	26	0	12	12	12	924.038	885.335	0	0	1	6207.5	5947.5	0	0	3	10	-111.942	153.026
443ChAT_ChATcreTdTOM_211020	443_good_Section1_ChAT_ChATcreTdTOM_211020	1	27	0	37	37	37	895.457	980.009	0	0	1	6015.5	6583.5	0	0	3	10	-140.523	247.7
443ChAT_ChATcreTdTOM_211020	443_good_Section1_ChAT_ChATcreTdTOM_211020	1	28	0	64	64	64	1547.46	720.995	0	0	1	10395.5	4843.5	0	0	4	39	511.477	-11.314
443ChAT_ChATcreTdTOM_211020	443_good_Section1_ChAT_ChATcreTdTOM_211020	1	29	0	71	71	71	1524.23	778.157	0	0	1	10239.5	5227.5	0	0	4	39	488.255	45.848
443ChAT_ChATcreTdTOM_211020	443_good_Section1_ChAT_ChATcreTdTOM_211020	1	30	0	40	40	40	1583.18	796.02	0	0	1	10635.5	5347.5	0	0	4	39	547.203	63.711
443ChAT_ChATcreTdTOM_211020	443_good_Section1_ChAT_ChATcreTdTOM_211020	1	31	0	37	37	37	1540.31	837.105	0	0	1	10347.5	5623.5	0	0	4	39	504.332	104.796
443ChAT_ChATcreTdTOM_211020	443_good_Section1_ChAT_ChATcreTdTOM_211020	1	32	0	74	74	74	1477.79	878.19	0	0	1	9927.5	5899.5	0	0	4	39	441.811	145.881
443ChAT_ChATcreTdTOM_211020	443_good_Section1_ChAT_ChATcreTdTOM_211020	1	33	0	34	34	34	1495.65	929.992	0	0	1	10047.5	6247.5	0	0	4	39	459.674	197.683
443ChAT_ChATcreTdTOM_211020	443_good_Section1_ChAT_ChATcreTdTOM_211020	1	34	0	39	39	39	1547.46	890.694	0	0	1	10395.5	5983.5	0	0	4	39	511.477	158.385
443ChAT_ChATcreTdTOM_211020	443_good_Section1_ChAT_ChATcreTdTOM_211020	1	35	0	46	46	46	1567.11	940.71	0	0	1	10527.5	6319.5	0	0	4	39	531.126	208.401
443ChAT_ChATcreTdTOM_211020	443_good_Section1_ChAT_ChATcreTdTOM_211020	1	36	0	10	10	10	1631.41	937.138	0	0	1	10959.5	6295.5	0	0	4	39	595.433	204.829
443ChAT_ChATcreTdTOM_211020	443_good_Section1_ChAT_ChATcreTdTOM_211020	1	37	0	67	67	67	1565.32	980.009	0	0	1	10515.5	6583.5	0	0	4	39	529.34	247.7
443ChAT_ChATcreTdTOM_211020	443_good_Section1_ChAT_ChATcreTdTOM_211020	1	38	0	40	40	40	1476.01	994.299	0	0	1	9915.5	6679.5	0	0	4	39	440.025	261.99
443ChAT_ChATcreTdTOM_211020	443_good_Section1_ChAT_ChATcreTdTOM_211020	1	39	0	51	51	51	1493.87	1030.03	0	0	1	10035.5	6919.5	0	0	4	39	457.888	297.716
443ChAT_ChATcreTdTOM_211020	443_good_Section1_ChAT_ChATcreTdTOM_211020	1	40	0	64	64	64	1254.5	1040.74	0	0	1	8427.5	6991.5	0	0	4	39	218.524	308.434
443ChAT_ChATcreTdTOM_211020	443_good_Section1_ChAT_ChATcreTdTOM_211020	1	41	0	45	45	45	1547.46	1013.95	0	0	1	10395.5	6811.5	0	0	4	39	511.477	281.64
443ChAT_ChATcreTdTOM_211020	443_good_Section1_ChAT_ChATcreTdTOM_211020	1	42	0	68	68	68	1568.89	1038.96	0	0	1	10539.5	6979.5	0	0	4	39	532.912	306.648
443ChAT_ChATcreTdTOM_211020	443_good_Section1_ChAT_ChATcreTdTOM_211020	1	43	0	40	40	40	1595.69	1074.68	0	0	1	10719.5	7219.5	0	0	4	39	559.707	342.374
443ChAT_ChATcreTdTOM_211020	443_good_Section1_ChAT_ChATcreTdTOM_211020	1	44	0	64	64	64	1649.28	1072.9	0	0	1	11079.5	7207.5	0	0	4	39	613.296	340.587
443ChAT_ChATcreTdTOM_211020	443_good_Section1_ChAT_ChATcreTdTOM_211020	1	45	0	43	43	43	1704.65	1067.54	0	0	1	11451.5	7171.5	0	0	4	39	668.671	335.229
443ChAT_ChATcreTdTOM_211020	443_good_Section1_ChAT_ChATcreTdTOM_211020	1	46	0	11	11	11	1677.86	1181.86	0	0	1	11271.5	7939.5	0	0	4	39	641.877	449.552
443ChAT_ChATcreTdTOM_211020	443_good_Section1_ChAT_ChATcreTdTOM_211020	1	47	0	18	18	18	1633.2	1180.07	0	0	1	10971.5	7927.5	0	0	4	39	597.219	447.765
443ChAT_ChATcreTdTOM_211020	443_good_Section1_ChAT_ChATcreTdTOM_211020	1	48	0	36	36	36	806.142	1060.39	0	0	1	5415.5	7123.5	0	0	4	39	-229.838	328.083
443ChAT_ChATcreTdTOM_211020	443_good_Section1_ChAT_ChATcreTdTOM_211020	1	49	0	17	17	17	829.364	1053.25	0	0	1	5571.5	7075.5	0	0	4	39	-206.616	320.938
443ChAT_ChATcreTdTOM_211020	443_good_Section1_ChAT_ChATcreTdTOM_211020	1	50	0	82	82	82	579.282	1047.89	0	0	1	3891.5	7039.5	0	0	4	39	-456.698	315.579
443ChAT_ChATcreTdTOM_211020	443_good_Section1_ChAT_ChATcreTdTOM_211020	1	51	0	6	6	6	582.855	1097.9	0	0	1	3915.5	7375.5	0	0	4	39	-453.125	365.596
443ChAT_ChATcreTdTOM_211020	443_good_Section1_ChAT_ChATcreTdTOM_211020	1	52	0	64	64	64	482.822	1153.28	0	0	1	3243.5	7747.5	0	0	4	39	-553.158	420.971
443ChAT_ChATcreTdTOM_211020	443_good_Section1_ChAT_ChATcreTdTOM_211020	1	53	0	75	75	75	420.302	1092.55	0	0	1	2823.5	7339.5	0	0	4	39	-615.678	360.237
443ChAT_ChATcreTdTOM_211020	443_good_Section1_ChAT_ChATcreTdTOM_211020	1	54	0	34	34	34	361.354	1155.07	0	0	1	2427.5	7759.5	0	0	4	39	-674.626	422.757
443ChAT_ChATcreTdTOM_211020	443_good_Section1_ChAT_ChATcreTdTOM_211020	1	55	0	70	70	70	482.822	946.069	0	0	1	3243.5	6355.5	0	0	4	39	-553.158	213.76
443ChAT_ChATcreTdTOM_211020	443_good_Section1_ChAT_ChATcreTdTOM_211020	1	56	0	55	55	55	573.923	887.121	0	0	1	3855.5	5959.5	0	0	4	39	-462.057	154.812
443ChAT_ChATcreTdTOM_211020	443_good_Section1_ChAT_ChATcreTdTOM_211020	1	57	0	40	40	40	543.556	735.286	0	0	1	3651.5	4939.5	0	0	4	39	-492.424	2.977
443ChAT_ChATcreTdTOM_211020	443_good_Section1_ChAT_ChATcreTdTOM_211020	1	58	0	20	20	20	579.282	781.73	0	0	1	3891.5	5251.5	0	0	4	39	-456.698	49.421
443ChAT_ChATcreTdTOM_211020	443_good_Section1_ChAT_ChATcreTdTOM_211020	1	59	0	17	17	17	500.685	740.645	0	0	1	3363.5	4975.5	0	0	4	39	-535.295	8.336
443ChAT_ChATcreTdTOM_211020	443_good_Section1_ChAT_ChATcreTdTOM_211020	1	60	0	3	3	3	531.052	779.943	0	0	1	3567.5	5239.5	0	0	4	39	-504.928	47.634
443ChAT_ChATcreTdTOM_211020	443_good_Section1_ChAT_ChATcreTdTOM_211020	1	61	0	8	8	8	468.532	758.508	0	0	1	3147.5	5095.5	0	0	4	39	-567.448	26.199
443ChAT_ChATcreTdTOM_211020	443_good_Section1_ChAT_ChATcreTdTOM_211020	1	62	0	69	69	69	488.181	815.669	0	0	1	3279.5	5479.5	0	0	4	39	-547.799	83.36
443ChAT_ChATcreTdTOM_211020	443_good_Section1_ChAT_ChATcreTdTOM_211020	1	63	0	72	72	72	443.523	826.387	0	0	1	2979.5	5551.5	0	0	4	39	-592.457	94.078
443ChAT_ChATcreTdTOM_211020	443_good_Section1_ChAT_ChATcreTdTOM_211020	1	64	0	11	11	11	406.011	781.73	0	0	1	2727.5	5251.5	0	0	4	39	-629.969	49.421
443ChAT_ChATcreTdTOM_211020	443_good_Section1_ChAT_ChATcreTdTOM_211020	1	65	0	38	38	38	386.362	878.19	0	0	1	2595.5	5899.5	0	0	4	39	-649.618	145.881
443ChAT_ChATcreTdTOM_211020	443_good_Section1_ChAT_ChATcreTdTOM_211020	1	66	0	22	22	22	489.967	869.258	0	0	1	3291.5	5839.5	0	0	4	39	-546.013	136.949
443ChAT_ChATcreTdTOM_211020	443_goodSection2_5_ChAT_ChATcreTdTOM_211020	2	1	0	7	7	7	911.013	619.846	0	0	2	6120	4164	0	0	0	1	0	0
443ChAT_ChATcreTdTOM_211020	443_goodSection2_5_ChAT_ChATcreTdTOM_211020	2	2	0	22	22	22	1318.21	588.214	0	0	2	8855.5	3951.5	0	0	1	4	407.202	-31.632
443ChAT_ChATcreTdTOM_211020	443_goodSection2_5_ChAT_ChATcreTdTOM_211020	2	3	0	12	12	12	1233.07	529.861	0	0	2	8283.5	3559.5	0	0	1	4	322.055	-89.985
443ChAT_ChATcreTdTOM_211020	443_goodSection2_5_ChAT_ChATcreTdTOM_211020	2	4	0	9	9	9	940.71	589.405	0	0	2	6319.5	3959.5	0	0	1	4	29.697	-30.441
443ChAT_ChATcreTdTOM_211020	443_goodSection2_5_ChAT_ChATcreTdTOM_211020	2	5	0	14	14	14	991.322	567.374	0	0	2	6659.5	3811.5	0	0	1	4	80.309	-52.472
443ChAT_ChATcreTdTOM_211020	443_goodSection2_5_ChAT_ChATcreTdTOM_211020	2	6	0	10	10	10	581.664	679.613	0	0	1	3907.5	4565.5	0	0	2	7	-329.349	59.767
443ChAT_ChATcreTdTOM_211020	443_goodSection2_5_ChAT_ChATcreTdTOM_211020	2	7	0	34	34	34	736.626	635.848	0	0	1	4948.5	4271.5	0	0	2	7	-174.387	16.002
443ChAT_ChATcreTdTOM_211020	443_goodSection2_5_ChAT_ChATcreTdTOM_211020	2	8	0	31	31	31	699.113	621.111	0	0	1	4696.5	4172.5	0	0	2	7	-211.9	1.265
443ChAT_ChATcreTdTOM_211020	443_goodSection2_5_ChAT_ChATcreTdTOM_211020	2	9	0	39	39	39	470.616	177.811	0	0	1	3161.5	1194.5	0	0	2	7	-440.397	-442.035
443ChAT_ChATcreTdTOM_211020	443_goodSection2_5_ChAT_ChATcreTdTOM_211020	2	10	0	69	69	69	493.391	172.899	0	0	1	3314.5	1161.5	0	0	2	7	-417.622	-446.947
443ChAT_ChATcreTdTOM_211020	443_goodSection2_5_ChAT_ChATcreTdTOM_211020	2	11	0	13	13	13	1170.85	782.92	0	0	1	7865.5	5259.5	0	0	2	7	259.832	163.074
443ChAT_ChATcreTdTOM_211020	443_goodSection2_5_ChAT_ChATcreTdTOM_211020	2	12	0	18	18	18	1133.78	731.564	0	0	1	7616.5	4914.5	0	0	2	7	222.767	111.718
443ChAT_ChATcreTdTOM_211020	443_goodSection2_5_ChAT_ChATcreTdTOM_211020	2	13	0	11	11	11	1361.09	353.613	0	0	1	9143.5	2375.5	0	0	3	6	450.073	-266.233
443ChAT_ChATcreTdTOM_211020	443_goodSection2_5_ChAT_ChATcreTdTOM_211020	2	14	0	8	8	8	1280.7	333.964	0	0	1	8603.5	2243.5	0	0	3	6	369.69	-285.882
443ChAT_ChATcreTdTOM_211020	443_goodSection2_5_ChAT_ChATcreTdTOM_211020	2	15	0	44	44	44	1189.6	283.947	0	0	1	7991.5	1907.5	0	0	3	6	278.588	-335.899
443ChAT_ChATcreTdTOM_211020	443_goodSection2_5_ChAT_ChATcreTdTOM_211020	2	16	0	32	32	32	937.733	520.632	0	0	1	6299.5	3497.5	0	0	3	6	26.72	-99.214
443ChAT_ChATcreTdTOM_211020	443_goodSection2_5_ChAT_ChATcreTdTOM_211020	2	17	0	24	24	24	842.166	550.106	0	0	1	5657.5	3695.5	0	0	3	6	-68.847	-69.74
443ChAT_ChATcreTdTOM_211020	443_goodSection2_5_ChAT_ChATcreTdTOM_211020	2	18	0	25	25	25	523.311	669.788	0	0	1	3515.5	4499.5	0	0	3	6	-387.702	49.942
443ChAT_ChATcreTdTOM_211020	443_goodSection2_5_ChAT_ChATcreTdTOM_211020	2	19	0	14	14	14	408.988	841.273	0	0	1	2747.5	5651.5	0	0	4	21	-502.025	221.427
443ChAT_ChATcreTdTOM_211020	443_goodSection2_5_ChAT_ChATcreTdTOM_211020	2	20	0	73	73	73	441.142	860.922	0	0	1	2963.5	5783.5	0	0	4	21	-469.871	241.076
443ChAT_ChATcreTdTOM_211020	443_goodSection2_5_ChAT_ChATcreTdTOM_211020	2	21	0	71	71	71	466.15	891.289	0	0	1	3131.5	5987.5	0	0	4	21	-444.863	271.443
443ChAT_ChATcreTdTOM_211020	443_goodSection2_5_ChAT_ChATcreTdTOM_211020	2	22	0	44	44	44	433.996	882.358	0	0	1	2915.5	5927.5	0	0	4	21	-477.017	262.512
443ChAT_ChATcreTdTOM_211020	443_goodSection2_5_ChAT_ChATcreTdTOM_211020	2	23	0	62	62	62	450.073	923.443	0	0	1	3023.5	6203.5	0	0	4	21	-460.94	303.597
443ChAT_ChATcreTdTOM_211020	443_goodSection2_5_ChAT_ChATcreTdTOM_211020	2	24	0	45	45	45	401.843	902.007	0	0	1	2699.5	6059.5	0	0	4	21	-509.17	282.161
443ChAT_ChATcreTdTOM_211020	443_goodSection2_5_ChAT_ChATcreTdTOM_211020	2	25	0	67	67	67	414.347	957.382	0	0	1	2783.5	6431.5	0	0	4	21	-496.666	337.536
443ChAT_ChATcreTdTOM_211020	443_goodSection2_5_ChAT_ChATcreTdTOM_211020	2	26	0	72	72	72	373.262	975.245	0	0	1	2507.5	6551.5	0	0	4	21	-537.751	355.399
443ChAT_ChATcreTdTOM_211020	443_goodSection2_5_ChAT_ChATcreTdTOM_211020	2	27	0	16	16	16	389.339	1014.54	0	0	1	2615.5	6815.5	0	0	4	21	-521.674	394.698
443ChAT_ChATcreTdTOM_211020	443_goodSection2_5_ChAT_ChATcreTdTOM_211020	2	28	0	52	52	52	723.377	907.366	0	0	1	4859.5	6095.5	0	0	4	21	-187.636	287.52
443ChAT_ChATcreTdTOM_211020	443_goodSection2_5_ChAT_ChATcreTdTOM_211020	2	29	0	3	3	3	701.942	939.519	0	0	1	4715.5	6311.5	0	0	4	21	-209.071	319.673
443ChAT_ChATcreTdTOM_211020	443_goodSection2_5_ChAT_ChATcreTdTOM_211020	2	30	0	63	63	63	1141.37	941.306	0	0	1	7667.5	6323.5	0	0	4	21	230.358	321.46
443ChAT_ChATcreTdTOM_211020	443_goodSection2_5_ChAT_ChATcreTdTOM_211020	2	31	0	48	48	48	1166.38	932.374	0	0	1	7835.5	6263.5	0	0	4	21	255.367	312.528
443ChAT_ChATcreTdTOM_211020	443_goodSection2_5_ChAT_ChATcreTdTOM_211020	2	32	0	9	9	9	1189.6	946.665	0	0	1	7991.5	6359.5	0	0	4	21	278.588	326.819
443ChAT_ChATcreTdTOM_211020	443_goodSection2_5_ChAT_ChATcreTdTOM_211020	2	33	0	70	70	70	1168.17	971.673	0	0	1	7847.5	6527.5	0	0	4	21	257.153	351.827
443ChAT_ChATcreTdTOM_211020	443_goodSection2_5_ChAT_ChATcreTdTOM_211020	2	34	0	15	15	15	1361.09	853.777	0	0	1	9143.5	5735.5	0	0	4	21	450.073	233.931
443ChAT_ChATcreTdTOM_211020	443_goodSection2_5_ChAT_ChATcreTdTOM_211020	2	35	0	47	47	47	1409.32	900.221	0	0	1	9467.5	6047.5	0	0	4	21	498.303	280.375
443ChAT_ChATcreTdTOM_211020	443_goodSection2_5_ChAT_ChATcreTdTOM_211020	2	36	0	46	46	46	1455.76	934.161	0	0	1	9779.5	6275.5	0	0	4	21	544.747	314.315
443ChAT_ChATcreTdTOM_211020	443_goodSection2_5_ChAT_ChATcreTdTOM_211020	2	37	0	11	11	11	1361.09	919.87	0	0	1	9143.5	6179.5	0	0	4	21	450.073	300.024
443ChAT_ChATcreTdTOM_211020	443_goodSection2_5_ChAT_ChATcreTdTOM_211020	2	38	0	6	6	6	1420.03	962.741	0	0	1	9539.5	6467.5	0	0	4	21	509.021	342.895
443ChAT_ChATcreTdTOM_211020	443_goodSection2_5_ChAT_ChATcreTdTOM_211020	2	39	0	1	1	1	1377.16	993.108	0	0	1	9251.5	6671.5	0	0	4	21	466.15	373.262
443ChAT_ChATcreTdTOM_211020	443_goodSection2_5_ChAT_ChATcreTdTOM_211020	3	1	0	10	10	10	571.229	969.147	0	0	2	4508.4	7648.53	0	0	4	27	364.468	293.635
443ChAT_ChATcreTdTOM_211020	443_goodSection2_5_ChAT_ChATcreTdTOM_211020	3	2	0	22	22	22	1012.7	699.473	0	0	2	7474.08	5836.92	0	0	0	1	0	0
443ChAT_ChATcreTdTOM_211020	443_goodSection2_5_ChAT_ChATcreTdTOM_211020	3	3	0	28	28	28	1028.39	654.158	0	0	2	7579.5	5532.5	0	0	1	3	15.693	-45.315
443ChAT_ChATcreTdTOM_211020	443_goodSection2_5_ChAT_ChATcreTdTOM_211020	3	4	0	51	51	51	996.234	614.859	0	0	2	7363.5	5268.5	0	0	1	3	-16.461	-84.614
443ChAT_ChATcreTdTOM_211020	443_goodSection2_5_ChAT_ChATcreTdTOM_211020	3	5	0	44	44	44	677.678	562.312	0	0	2	5223.5	4915.5	0	0	1	3	-335.017	-137.161
443ChAT_ChATcreTdTOM_211020	443_goodSection2_5_ChAT_ChATcreTdTOM_211020	3	6	0	10	10	10	683.632	836.212	0	0	1	5263.5	6755.5	0	0	2	13	-329.063	136.739
443ChAT_ChATcreTdTOM_211020	443_goodSection2_5_ChAT_ChATcreTdTOM_211020	3	7	0	10	10	10	884.293	697.625	0	0	2	6611.5	5824.5	0	0	2	13	-128.402	-1.848
443ChAT_ChATcreTdTOM_211020	443_goodSection2_5_ChAT_ChATcreTdTOM_211020	3	8	0	12	12	12	961.997	731.564	0	0	2	7133.5	6052.5	0	0	2	13	-50.698	32.091
443ChAT_ChATcreTdTOM_211020	443_goodSection2_5_ChAT_ChATcreTdTOM_211020	3	9	0	20	20	20	1062.92	748.534	0	0	2	7811.5	6166.5	0	0	2	13	50.228	49.061
443ChAT_ChATcreTdTOM_211020	443_goodSection2_5_ChAT_ChATcreTdTOM_211020	3	10	0	21	21	21	1066.5	651.181	0	0	2	7835.5	5512.5	0	0	2	13	53.801	-48.292
443ChAT_ChATcreTdTOM_211020	443_goodSection2_5_ChAT_ChATcreTdTOM_211020	3	11	0	7	7	7	1307.35	698.667	0	0	1	9453.5	5831.5	0	0	2	13	294.653	-0.806
443ChAT_ChATcreTdTOM_211020	443_goodSection2_5_ChAT_ChATcreTdTOM_211020	3	12	0	10	10	10	1321.64	881.762	0	0	2	9549.5	7061.5	0	0	2	13	308.944	182.289
443ChAT_ChATcreTdTOM_211020	443_goodSection2_5_ChAT_ChATcreTdTOM_211020	3	13	0	1	1	1	1484.19	281.863	0	0	1	10641.5	3031.5	0	0	2	13	471.497	-417.61
443ChAT_ChATcreTdTOM_211020	443_goodSection2_5_ChAT_ChATcreTdTOM_211020	3	14	0	152	152	152	1477.05	289.008	0	0	1	10593.5	3079.5	0	0	2	13	464.352	-410.465
443ChAT_ChATcreTdTOM_211020	443_goodSection2_5_ChAT_ChATcreTdTOM_211020	3	15	0	2	2	2	1399.64	255.664	0	0	1	10073.5	2855.5	0	0	2	13	386.946	-443.809
443ChAT_ChATcreTdTOM_211020	443_goodSection2_5_ChAT_ChATcreTdTOM_211020	3	16	0	47	47	47	584.195	245.393	0	0	1	4595.5	2786.5	0	0	2	13	-428.5	-454.08
443ChAT_ChATcreTdTOM_211020	443_goodSection2_5_ChAT_ChATcreTdTOM_211020	3	17	0	40	40	40	617.241	232.889	0	0	1	4817.5	2702.5	0	0	2	13	-395.454	-466.584
443ChAT_ChATcreTdTOM_211020	443_goodSection2_5_ChAT_ChATcreTdTOM_211020	3	18	0	7	7	7	970.631	657.731	0	0	1	7191.5	5556.5	0	0	3	8	-42.064	-41.742
443ChAT_ChATcreTdTOM_211020	443_goodSection2_5_ChAT_ChATcreTdTOM_211020	3	19	0	34	34	34	927.164	571.393	0	0	1	6899.5	4976.5	0	0	3	8	-85.531	-128.08
443ChAT_ChATcreTdTOM_211020	443_goodSection2_5_ChAT_ChATcreTdTOM_211020	3	20	0	51	51	51	1074.24	552.934	0	0	1	7887.5	4852.5	0	0	3	8	61.541	-146.539
443ChAT_ChATcreTdTOM_211020	443_goodSection2_5_ChAT_ChATcreTdTOM_211020	3	21	0	34	34	34	1096.27	602.355	0	0	1	8035.5	5184.5	0	0	3	8	83.572	-97.118
443ChAT_ChATcreTdTOM_211020	443_goodSection2_5_ChAT_ChATcreTdTOM_211020	3	22	0	17	17	17	1508.01	523.014	0	0	1	10801.5	4651.5	0	0	3	8	495.314	-176.459
443ChAT_ChATcreTdTOM_211020	443_goodSection2_5_ChAT_ChATcreTdTOM_211020	3	23	0	1	1	1	1271.33	265.787	0	0	1	9211.5	2923.5	0	0	3	8	258.63	-433.686
443ChAT_ChATcreTdTOM_211020	443_goodSection2_5_ChAT_ChATcreTdTOM_211020	3	24	0	19	19	19	1294.55	265.787	0	0	1	9367.5	2923.5	0	0	3	8	281.852	-433.686
443ChAT_ChATcreTdTOM_211020	443_goodSection2_5_ChAT_ChATcreTdTOM_211020	3	25	0	3	3	3	503.513	485.501	0	0	1	4053.5	4399.5	0	0	3	8	-509.182	-213.972
443ChAT_ChATcreTdTOM_211020	443_goodSection2_5_ChAT_ChATcreTdTOM_211020	3	26	0	11	11	11	528.224	535.667	0	0	1	4219.5	4736.5	0	0	2	13	-484.471	-163.806
443ChAT_ChATcreTdTOM_211020	443_goodSection2_5_ChAT_ChATcreTdTOM_211020	3	27	0	25	25	25	541.323	733.053	0	0	1	4307.5	6062.5	0	0	4	27	-471.372	33.58
443ChAT_ChATcreTdTOM_211020	443_goodSection2_5_ChAT_ChATcreTdTOM_211020	3	28	0	30	30	30	537.751	779.497	0	0	1	4283.5	6374.5	0	0	4	27	-474.944	80.024
443ChAT_ChATcreTdTOM_211020	443_goodSection2_5_ChAT_ChATcreTdTOM_211020	3	29	0	20	20	20	432.359	881.316	0	0	1	3575.5	7058.5	0	0	4	27	-580.336	181.843
443ChAT_ChATcreTdTOM_211020	443_goodSection2_5_ChAT_ChATcreTdTOM_211020	3	30	0	27	27	27	466.299	908.11	0	0	1	3803.5	7238.5	0	0	4	27	-546.396	208.637
443ChAT_ChATcreTdTOM_211020	443_goodSection2_5_ChAT_ChATcreTdTOM_211020	3	31	0	6	6	6	514.529	975.99	0	0	2	4127.5	7694.5	0	0	4	27	-498.166	276.517
443ChAT_ChATcreTdTOM_211020	443_goodSection2_5_ChAT_ChATcreTdTOM_211020	3	32	0	11	11	11	478.803	981.349	0	0	2	3887.5	7730.5	0	0	4	27	-533.892	281.876
443ChAT_ChATcreTdTOM_211020	443_goodSection2_5_ChAT_ChATcreTdTOM_211020	3	33	0	12	12	12	398.419	1084.95	0	0	2	3347.5	8426.5	0	0	4	27	-614.276	385.481
443ChAT_ChATcreTdTOM_211020	443_goodSection2_5_ChAT_ChATcreTdTOM_211020	3	34	0	16	16	16	335.899	992.066	0	0	2	2927.5	7802.5	0	0	4	27	-676.796	292.593
443ChAT_ChATcreTdTOM_211020	443_goodSection2_5_ChAT_ChATcreTdTOM_211020	3	35	0	25	25	25	485.948	875.957	0	0	2	3935.5	7022.5	0	0	4	27	-526.747	176.484
443ChAT_ChATcreTdTOM_211020	443_goodSection2_5_ChAT_ChATcreTdTOM_211020	3	36	0	15	15	15	464.512	840.231	0	0	2	3791.5	6782.5	0	0	4	27	-548.183	140.758
443ChAT_ChATcreTdTOM_211020	443_goodSection2_5_ChAT_ChATcreTdTOM_211020	3	37	0	14	14	14	394.847	1120.68	0	0	2	3323.5	8666.5	0	0	4	27	-617.848	421.207
443ChAT_ChATcreTdTOM_211020	443_goodSection2_5_ChAT_ChATcreTdTOM_211020	3	38	0	16	16	16	791.405	1033.15	0	0	2	5987.5	8078.5	0	0	4	27	-221.29	333.678
443ChAT_ChATcreTdTOM_211020	443_goodSection2_5_ChAT_ChATcreTdTOM_211020	3	39	0	37	37	37	800.337	990.28	0	0	2	6047.5	7790.5	0	0	4	27	-212.358	290.807
443ChAT_ChATcreTdTOM_211020	443_goodSection2_5_ChAT_ChATcreTdTOM_211020	3	40	0	17	17	17	1241.55	1024.22	0	0	2	9011.5	8018.5	0	0	4	27	228.858	324.747
443ChAT_ChATcreTdTOM_211020	443_goodSection2_5_ChAT_ChATcreTdTOM_211020	3	41	0	17	17	17	1546.71	759.996	0	0	2	11061.5	6243.5	0	0	4	27	534.018	60.523
443ChAT_ChATcreTdTOM_211020	443_goodSection2_5_ChAT_ChATcreTdTOM_211020	3	42	0	27	27	27	1485.98	861.22	0	0	2	10653.5	6923.5	0	0	4	27	473.283	161.747
443ChAT_ChATcreTdTOM_211020	443_goodSection2_5_ChAT_ChATcreTdTOM_211020	3	43	0	24	24	24	1593.16	880.274	0	0	2	11373.5	7051.5	0	0	4	27	580.461	180.801
443ChAT_ChATcreTdTOM_211020	443_goodSection2_5_ChAT_ChATcreTdTOM_211020	3	44	0	31	31	31	1665.8	913.618	0	0	2	11861.5	7275.5	0	0	4	27	653.104	214.145
443ChAT_ChATcreTdTOM_211020	443_goodSection2_5_ChAT_ChATcreTdTOM_211020	3	45	0	31	31	31	1584.82	918.382	0	0	2	11317.5	7307.5	0	0	4	27	572.125	218.909
443ChAT_ChATcreTdTOM_211020	443_goodSection2_5_ChAT_ChATcreTdTOM_211020	3	46	0	31	31	31	1484.79	998.17	0	0	2	10645.5	7843.5	0	0	4	27	472.093	298.697
443ChAT_ChATcreTdTOM_211020	443_goodSection2_5_ChAT_ChATcreTdTOM_211020	3	47	0	29	29	29	1485.98	1024.37	0	0	2	10653.5	8019.5	0	0	4	27	473.283	324.896
443ChAT_ChATcreTdTOM_211020	443_goodSection2_5_ChAT_ChATcreTdTOM_211020	3	48	0	11	11	11	1520.51	1046.99	0	0	2	10885.5	8171.5	0	0	4	27	507.819	347.522
443ChAT_ChATcreTdTOM_211020	443_goodSection2_5_ChAT_ChATcreTdTOM_211020	3	49	0	19	19	19	1576.48	1031.51	0	0	2	11261.5	8067.5	0	0	4	27	563.789	332.041
443ChAT_ChATcreTdTOM_211020	443_goodSection2_5_ChAT_ChATcreTdTOM_211020	3	50	0	52	52	52	1619.36	1037.47	0	0	2	11549.5	8107.5	0	0	4	27	606.66	337.995
443ChAT_ChATcreTdTOM_211020	443_goodSection2_5_ChAT_ChATcreTdTOM_211020	3	51	0	10	10	10	403.433	965.152	0	0	2	3381.18	7621.69	0	0	4	27	-609.262	265.679
443ChAT_ChATcreTdTOM_211020	443_goodSection2_5_ChAT_ChATcreTdTOM_211020	3	52	0	13	13	13	1282.37	1037.07	0	0	2	9285.69	8104.79	0	0	4	27	269.674	337.592
443ChAT_ChATcreTdTOM_211020	443_goodSection2_5_ChAT_ChATcreTdTOM_211020	4	1	0	19	19	19	888.759	604.923	0	0	2	5970.5	4063.75	0	0	0	3	0	0
443ChAT_ChATcreTdTOM_211020	443_goodSection2_5_ChAT_ChATcreTdTOM_211020	4	2	0	33	33	33	904.984	517.357	0	0	2	6079.5	3475.5	0	0	1	2	16.225	-87.566
443ChAT_ChATcreTdTOM_211020	443_goodSection2_5_ChAT_ChATcreTdTOM_211020	4	3	0	26	26	26	904.835	517.804	0	0	2	6078.5	3478.5	0	0	1	2	16.076	-87.119
443ChAT_ChATcreTdTOM_211020	443_goodSection2_5_ChAT_ChATcreTdTOM_211020	4	4	0	36	36	36	432.657	745.855	0	0	1	2906.5	5010.5	0	0	2	22	-456.102	140.932
443ChAT_ChATcreTdTOM_211020	443_goodSection2_5_ChAT_ChATcreTdTOM_211020	4	5	0	7	7	7	561.866	819.688	0	0	1	3774.5	5506.5	0	0	2	22	-326.893	214.765
443ChAT_ChATcreTdTOM_211020	443_goodSection2_5_ChAT_ChATcreTdTOM_211020	4	6	0	13	13	13	639.272	792.894	0	0	1	4294.5	5326.5	0	0	2	22	-249.487	187.971
443ChAT_ChATcreTdTOM_211020	443_goodSection2_5_ChAT_ChATcreTdTOM_211020	4	7	0	44	44	44	515.273	545.789	0	0	1	3461.5	3666.5	0	0	2	22	-373.486	-59.134
443ChAT_ChATcreTdTOM_211020	443_goodSection2_5_ChAT_ChATcreTdTOM_211020	4	8	0	35	35	35	835.914	378.77	0	0	1	5615.5	2544.5	0	0	2	22	-52.845	-226.153
443ChAT_ChATcreTdTOM_211020	443_goodSection2_5_ChAT_ChATcreTdTOM_211020	4	9	0	24	24	24	901.114	688.247	0	0	1	6053.5	4623.5	0	0	2	22	12.355	83.324
443ChAT_ChATcreTdTOM_211020	443_goodSection2_5_ChAT_ChATcreTdTOM_211020	4	10	0	15	15	15	906.473	661.005	0	0	1	6089.5	4440.5	0	0	2	22	17.714	56.082
443ChAT_ChATcreTdTOM_211020	443_goodSection2_5_ChAT_ChATcreTdTOM_211020	4	11	0	16	16	16	771.607	690.479	0	0	1	5183.5	4638.5	0	0	2	22	-117.152	85.556
443ChAT_ChATcreTdTOM_211020	443_goodSection2_5_ChAT_ChATcreTdTOM_211020	4	12	0	10	10	10	1019.01	643.142	0	0	1	6845.5	4320.5	0	0	2	22	130.251	38.219
443ChAT_ChATcreTdTOM_211020	443_goodSection2_5_ChAT_ChATcreTdTOM_211020	4	13	0	18	18	18	844.846	610.096	0	0	2	5675.5	4098.5	0	0	2	22	-43.913	5.173
443ChAT_ChATcreTdTOM_211020	443_goodSection2_5_ChAT_ChATcreTdTOM_211020	4	14	0	16	16	16	829.662	592.679	0	0	2	5573.5	3981.5	0	0	2	22	-59.097	-12.244
443ChAT_ChATcreTdTOM_211020	443_goodSection2_5_ChAT_ChATcreTdTOM_211020	4	15	0	28	28	28	1236.19	550.85	0	0	1	8304.5	3700.5	0	0	2	22	347.435	-54.073
443ChAT_ChATcreTdTOM_211020	443_goodSection2_5_ChAT_ChATcreTdTOM_211020	4	16	0	6	6	6	1293.36	528.819	0	0	1	8688.5	3552.5	0	0	2	22	404.597	-76.104
443ChAT_ChATcreTdTOM_211020	443_goodSection2_5_ChAT_ChATcreTdTOM_211020	4	17	0	32	32	32	1198.68	452.008	0	0	1	8052.5	3036.5	0	0	2	22	309.923	-152.915
443ChAT_ChATcreTdTOM_211020	443_goodSection2_5_ChAT_ChATcreTdTOM_211020	4	18	0	132	132	132	1159.83	142.83	0	0	1	7791.5	959.5	0	0	2	22	271.071	-462.093
443ChAT_ChATcreTdTOM_211020	443_goodSection2_5_ChAT_ChATcreTdTOM_211020	4	19	0	6	6	6	1175.31	373.262	0	0	1	7895.5	2507.5	0	0	2	22	286.552	-231.661
443ChAT_ChATcreTdTOM_211020	443_goodSection2_5_ChAT_ChATcreTdTOM_211020	4	20	0	19	19	19	697.327	90.58	0	0	1	4684.5	608.5	0	0	2	22	-191.432	-514.343
443ChAT_ChATcreTdTOM_211020	443_goodSection2_5_ChAT_ChATcreTdTOM_211020	4	21	0	83	83	83	724.568	139.257	0	0	1	4867.5	935.5	0	0	2	22	-164.191	-465.666
443ChAT_ChATcreTdTOM_211020	443_goodSection2_5_ChAT_ChATcreTdTOM_211020	4	22	0	46	46	46	757.615	139.257	0	0	1	5089.5	935.5	0	0	2	22	-131.144	-465.666
443ChAT_ChATcreTdTOM_211020	443_goodSection2_5_ChAT_ChATcreTdTOM_211020	4	23	0	17	17	17	405.416	467.787	0	0	1	2723.5	3142.5	0	0	3	8	-483.343	-137.136
443ChAT_ChATcreTdTOM_211020	443_goodSection2_5_ChAT_ChATcreTdTOM_211020	4	24	0	33	33	33	617.837	737.816	0	0	1	4150.5	4956.5	0	0	3	8	-270.922	132.893
443ChAT_ChATcreTdTOM_211020	443_goodSection2_5_ChAT_ChATcreTdTOM_211020	4	25	0	8	8	8	954.108	561.419	0	0	1	6409.5	3771.5	0	0	3	8	65.349	-43.504
443ChAT_ChATcreTdTOM_211020	443_goodSection2_5_ChAT_ChATcreTdTOM_211020	4	26	0	15	15	15	1023.77	537.602	0	0	1	6877.5	3611.5	0	0	2	22	135.014	-67.321
443ChAT_ChATcreTdTOM_211020	443_goodSection2_5_ChAT_ChATcreTdTOM_211020	4	27	0	8	8	8	940.413	453.05	0	0	1	6317.5	3043.5	0	0	2	22	51.654	-151.873
443ChAT_ChATcreTdTOM_211020	443_goodSection2_5_ChAT_ChATcreTdTOM_211020	4	28	0	4	4	4	1199.13	603.695	0	0	1	8055.5	4055.5	0	0	3	8	310.369	-1.228
443ChAT_ChATcreTdTOM_211020	443_goodSection2_5_ChAT_ChATcreTdTOM_211020	4	29	0	16	16	16	1328.93	287.52	0	0	1	8927.5	1931.5	0	0	3	8	440.174	-317.403
443ChAT_ChATcreTdTOM_211020	443_goodSection2_5_ChAT_ChATcreTdTOM_211020	4	30	0	8	8	8	1277.13	189.273	0	0	1	8579.5	1271.5	0	0	3	8	388.371	-415.65
443ChAT_ChATcreTdTOM_211020	443_goodSection2_5_ChAT_ChATcreTdTOM_211020	4	31	0	7	7	7	1162.81	96.386	0	0	1	7811.5	647.5	0	0	3	8	274.048	-508.537
443ChAT_ChATcreTdTOM_211020	443_goodSection2_5_ChAT_ChATcreTdTOM_211020	4	32	0	11	11	11	689.437	141.043	0	0	1	4631.5	947.5	0	0	3	8	-199.322	-463.88
443ChAT_ChATcreTdTOM_211020	443_goodSection2_5_ChAT_ChATcreTdTOM_211020	4	33	0	46	46	46	358.079	683.93	0	0	1	2405.5	4594.5	0	0	4	26	-530.68	79.007
443ChAT_ChATcreTdTOM_211020	443_goodSection2_5_ChAT_ChATcreTdTOM_211020	4	34	0	21	21	21	364.629	648.204	0	0	1	2449.5	4354.5	0	0	4	26	-524.13	43.281
443ChAT_ChATcreTdTOM_211020	443_goodSection2_5_ChAT_ChATcreTdTOM_211020	4	35	0	33	33	33	336.048	639.868	0	0	1	2257.5	4298.5	0	0	4	26	-552.711	34.945
443ChAT_ChATcreTdTOM_211020	443_goodSection2_5_ChAT_ChATcreTdTOM_211020	4	36	0	17	17	17	297.345	670.83	0	0	1	1997.5	4506.5	0	0	4	26	-591.414	65.907
443ChAT_ChATcreTdTOM_211020	443_goodSection2_5_ChAT_ChATcreTdTOM_211020	4	37	0	77	77	77	281.863	740.496	0	0	1	1893.5	4974.5	0	0	4	26	-606.896	135.573
443ChAT_ChATcreTdTOM_211020	443_goodSection2_5_ChAT_ChATcreTdTOM_211020	4	38	0	5	5	5	343.193	720.847	0	0	1	2305.5	4842.5	0	0	4	26	-545.566	115.924
443ChAT_ChATcreTdTOM_211020	443_goodSection2_5_ChAT_ChATcreTdTOM_211020	4	39	0	36	36	36	405.416	908.557	0	0	1	2723.5	6103.5	0	0	4	26	-483.343	303.634
443ChAT_ChATcreTdTOM_211020	443_goodSection2_5_ChAT_ChATcreTdTOM_211020	4	40	0	67	67	67	377.728	919.275	0	0	1	2537.5	6175.5	0	0	4	26	-511.031	314.352
443ChAT_ChATcreTdTOM_211020	443_goodSection2_5_ChAT_ChATcreTdTOM_211020	4	41	0	5	5	5	346.468	877.297	0	0	1	2327.5	5893.5	0	0	4	26	-542.291	272.374
443ChAT_ChATcreTdTOM_211020	443_goodSection2_5_ChAT_ChATcreTdTOM_211020	4	42	0	3	3	3	820.879	693.605	0	0	1	5514.5	4659.5	0	0	4	26	-67.88	88.682
443ChAT_ChATcreTdTOM_211020	443_goodSection2_5_ChAT_ChATcreTdTOM_211020	4	43	0	6	6	6	943.539	719.805	0	0	1	6338.5	4835.5	0	0	4	26	54.78	114.882
443ChAT_ChATcreTdTOM_211020	443_goodSection2_5_ChAT_ChATcreTdTOM_211020	4	44	0	54	54	54	960.211	744.813	0	0	1	6450.5	5003.5	0	0	4	26	71.452	139.89
443ChAT_ChATcreTdTOM_211020	443_goodSection2_5_ChAT_ChATcreTdTOM_211020	4	45	0	9	9	9	1044.76	720.995	0	0	1	7018.5	4843.5	0	0	4	26	156.003	116.072
443ChAT_ChATcreTdTOM_211020	443_goodSection2_5_ChAT_ChATcreTdTOM_211020	4	46	0	13	13	13	1140.03	861.518	0	0	1	7658.5	5787.5	0	0	4	26	251.273	256.595
443ChAT_ChATcreTdTOM_211020	443_goodSection2_5_ChAT_ChATcreTdTOM_211020	4	47	0	16	16	16	1170.99	906.771	0	0	1	7866.5	6091.5	0	0	4	26	282.235	301.848
443ChAT_ChATcreTdTOM_211020	443_goodSection2_5_ChAT_ChATcreTdTOM_211020	4	48	0	13	13	13	1384.16	921.061	0	0	1	9298.5	6187.5	0	0	4	26	495.4	316.138
443ChAT_ChATcreTdTOM_211020	443_goodSection2_5_ChAT_ChATcreTdTOM_211020	4	49	0	5	5	5	1406.79	847.227	0	0	1	9450.5	5691.5	0	0	4	26	518.027	242.304
443ChAT_ChATcreTdTOM_211020	443_goodSection2_5_ChAT_ChATcreTdTOM_211020	4	50	0	12	12	12	1452.04	743.622	0	0	1	9754.5	4995.5	0	0	4	26	563.28	138.699
443ChAT_ChATcreTdTOM_211020	443_goodSection2_5_ChAT_ChATcreTdTOM_211020	4	51	0	72	72	72	1465.14	717.423	0	0	1	9842.5	4819.5	0	0	4	26	576.379	112.5
443ChAT_ChATcreTdTOM_211020	443_goodSection2_5_ChAT_ChATcreTdTOM_211020	4	52	0	35	35	35	1466.33	675.742	0	0	1	9850.5	4539.5	0	0	4	26	577.57	70.819
443ChAT_ChATcreTdTOM_211020	443_goodSection2_5_ChAT_ChATcreTdTOM_211020	4	53	0	17	17	17	1508.01	719.805	0	0	1	10130.5	4835.5	0	0	4	26	619.25	114.882
443ChAT_ChATcreTdTOM_211020	443_goodSection2_5_ChAT_ChATcreTdTOM_211020	4	54	0	4	4	4	1535.4	667.406	0	0	1	10314.5	4483.5	0	0	4	26	646.64	62.483
443ChAT_ChATcreTdTOM_211020	443_goodSection2_5_ChAT_ChATcreTdTOM_211020	4	55	0	70	70	70	1499.67	670.979	0	0	1	10074.5	4507.5	0	0	4	26	610.914	66.056
443ChAT_ChATcreTdTOM_211020	443_goodSection2_5_ChAT_ChATcreTdTOM_211020	4	56	0	12	12	12	1428.22	660.261	0	0	1	9594.5	4435.5	0	0	4	26	539.462	55.338
443ChAT_ChATcreTdTOM_211020	443_goodSection2_5_ChAT_ChATcreTdTOM_211020	4	57	0	84	84	84	1409.17	631.68	0	0	1	9466.5	4243.5	0	0	4	26	520.408	26.757
443ChAT_ChATcreTdTOM_211020	443_goodSection2_5_ChAT_ChATcreTdTOM_211020	4	58	0	89	89	89	1455.61	604.29	0	0	1	9778.5	4059.5	0	0	4	26	566.852	-0.633
443ChAT_ChATcreTdTOM_211020	443_goodSection2_5_ChAT_ChATcreTdTOM_211020	4	59	0	17	17	17	589.851	399.908	0	0	1	3962.5	2686.5	0	0	2	22	-298.908	-205.015
443ChAT_ChATcreTdTOM_211020	443_goodSection2_5_ChAT_ChATcreTdTOM_211020	5	1	0	13	13	13	900.37	762.825	0	0	2	6048.5	5124.5	0	0	2	10	-197.684	-47.634
443ChAT_ChATcreTdTOM_211020	443_goodSection2_5_ChAT_ChATcreTdTOM_211020	5	2	0	10	10	10	1098.05	810.459	0	0	2	7376.5	5444.5	0	0	0	1	0	0
443ChAT_ChATcreTdTOM_211020	443_goodSection2_5_ChAT_ChATcreTdTOM_211020	5	3	0	23	23	23	1028.24	808.078	0	0	1	6907.5	5428.5	0	0	2	10	-69.815	-2.381
443ChAT_ChATcreTdTOM_211020	443_goodSection2_5_ChAT_ChATcreTdTOM_211020	5	4	0	13	13	13	1066.64	833.979	0	0	1	7165.5	5602.5	0	0	2	10	-31.41	23.52
443ChAT_ChATcreTdTOM_211020	443_goodSection2_5_ChAT_ChATcreTdTOM_211020	5	5	0	12	12	12	1190.2	796.913	0	0	2	7995.5	5353.5	0	0	2	10	92.143	-13.546
443ChAT_ChATcreTdTOM_211020	443_goodSection2_5_ChAT_ChATcreTdTOM_211020	5	6	0	8	8	8	1364.66	543.854	0	0	1	9167.5	3653.5	0	0	2	10	266.605	-266.605
443ChAT_ChATcreTdTOM_211020	443_goodSection2_5_ChAT_ChATcreTdTOM_211020	5	7	0	10	10	10	1287.7	813.436	0	0	1	8650.5	5464.5	0	0	2	10	189.645	2.977
443ChAT_ChATcreTdTOM_211020	443_goodSection2_5_ChAT_ChATcreTdTOM_211020	5	8	0	36	36	36	1360.49	347.361	0	0	1	9139.5	2333.5	0	0	2	10	262.437	-463.098
443ChAT_ChATcreTdTOM_211020	443_goodSection2_5_ChAT_ChATcreTdTOM_211020	5	9	0	37	37	37	1508.75	358.079	0	0	1	10135.5	2405.5	0	0	2	10	410.7	-452.38
443ChAT_ChATcreTdTOM_211020	443_goodSection2_5_ChAT_ChATcreTdTOM_211020	5	10	0	38	38	38	573.328	398.27	0	0	1	3851.5	2675.5	0	0	2	10	-524.726	-412.189
443ChAT_ChATcreTdTOM_211020	443_goodSection2_5_ChAT_ChATcreTdTOM_211020	5	11	0	51	51	51	922.55	330.838	0	0	1	6197.5	2222.5	0	0	3	7	-175.504	-479.621
443ChAT_ChATcreTdTOM_211020	443_goodSection2_5_ChAT_ChATcreTdTOM_211020	5	12	0	20	20	20	701.048	721.591	0	0	1	4709.5	4847.5	0	0	3	7	-397.006	-88.868
443ChAT_ChATcreTdTOM_211020	443_goodSection2_5_ChAT_ChATcreTdTOM_211020	5	13	0	20	20	20	1051.46	778.306	0	0	1	7063.5	5228.5	0	0	2	10	-46.593	-32.153
443ChAT_ChATcreTdTOM_211020	443_goodSection2_5_ChAT_ChATcreTdTOM_211020	5	14	0	45	45	45	1080.04	709.831	0	0	1	7255.5	4768.5	0	0	3	7	-18.012	-100.628
443ChAT_ChATcreTdTOM_211020	443_goodSection2_5_ChAT_ChATcreTdTOM_211020	5	15	0	7	7	7	1137.8	677.678	0	0	1	7643.5	4552.5	0	0	3	7	39.745	-132.781
443ChAT_ChATcreTdTOM_211020	443_goodSection2_5_ChAT_ChATcreTdTOM_211020	5	16	0	18	18	18	1144.35	715.19	0	0	1	7687.5	4804.5	0	0	3	7	46.294	-95.269
443ChAT_ChATcreTdTOM_211020	443_goodSection2_5_ChAT_ChATcreTdTOM_211020	5	17	0	0	0	0	1043.72	709.831	0	0	1	7011.5	4768.5	0	0	1	1	-54.334	-100.628
443ChAT_ChATcreTdTOM_211020	443_goodSection2_5_ChAT_ChATcreTdTOM_211020	5	18	0	11	11	11	528.075	910.939	0	0	1	3547.5	6119.5	0	0	4	34	-569.979	100.48
443ChAT_ChATcreTdTOM_211020	443_goodSection2_5_ChAT_ChATcreTdTOM_211020	5	19	0	32	32	32	555.465	940.71	0	0	1	3731.5	6319.5	0	0	4	34	-542.589	130.251
443ChAT_ChATcreTdTOM_211020	443_goodSection2_5_ChAT_ChATcreTdTOM_211020	5	20	0	35	35	35	495.922	962.146	0	0	1	3331.5	6463.5	0	0	4	34	-602.132	151.687
443ChAT_ChATcreTdTOM_211020	443_goodSection2_5_ChAT_ChATcreTdTOM_211020	5	21	0	16	16	16	534.029	976.436	0	0	1	3587.5	6559.5	0	0	4	34	-564.025	165.977
443ChAT_ChATcreTdTOM_211020	443_goodSection2_5_ChAT_ChATcreTdTOM_211020	5	22	0	24	24	24	561.419	1047.89	0	0	1	3771.5	7039.5	0	0	4	34	-536.635	237.429
443ChAT_ChATcreTdTOM_211020	443_goodSection2_5_ChAT_ChATcreTdTOM_211020	5	23	0	38	38	38	610.245	1032.41	0	0	1	4099.5	6935.5	0	0	4	34	-487.809	221.948
443ChAT_ChATcreTdTOM_211020	443_goodSection2_5_ChAT_ChATcreTdTOM_211020	5	24	0	42	42	42	609.054	1069.32	0	0	1	4091.5	7183.5	0	0	4	34	-489	258.865
443ChAT_ChATcreTdTOM_211020	443_goodSection2_5_ChAT_ChATcreTdTOM_211020	5	25	0	16	16	16	604.29	1121.72	0	0	1	4059.5	7535.5	0	0	4	34	-493.764	311.263
443ChAT_ChATcreTdTOM_211020	443_goodSection2_5_ChAT_ChATcreTdTOM_211020	5	26	0	33	33	33	473.295	1050.27	0	0	1	3179.5	7055.5	0	0	4	34	-624.759	239.811
443ChAT_ChATcreTdTOM_211020	443_goodSection2_5_ChAT_ChATcreTdTOM_211020	5	27	0	16	16	16	413.752	1147.92	0	0	1	2779.5	7711.5	0	0	4	34	-684.302	337.462
443ChAT_ChATcreTdTOM_211020	443_goodSection2_5_ChAT_ChATcreTdTOM_211020	5	28	0	39	39	39	438.76	1218.18	0	0	1	2947.5	8183.5	0	0	4	34	-659.294	407.723
443ChAT_ChATcreTdTOM_211020	443_goodSection2_5_ChAT_ChATcreTdTOM_211020	5	29	0	29	29	29	492.349	1222.95	0	0	1	3307.5	8215.5	0	0	4	34	-605.705	412.487
443ChAT_ChATcreTdTOM_211020	443_goodSection2_5_ChAT_ChATcreTdTOM_211020	5	30	0	26	26	26	529.266	1222.95	0	0	1	3555.5	8215.5	0	0	4	34	-568.788	412.487
443ChAT_ChATcreTdTOM_211020	443_goodSection2_5_ChAT_ChATcreTdTOM_211020	5	31	0	8	8	8	599.527	1158.64	0	0	1	4027.5	7783.5	0	0	4	34	-498.527	348.18
443ChAT_ChATcreTdTOM_211020	443_goodSection2_5_ChAT_ChATcreTdTOM_211020	5	32	0	12	12	12	849.609	1136.01	0	0	1	5707.5	7631.5	0	0	4	34	-248.445	325.553
443ChAT_ChATcreTdTOM_211020	443_goodSection2_5_ChAT_ChATcreTdTOM_211020	5	33	0	33	33	33	866.281	1136.01	0	0	1	5819.5	7631.5	0	0	4	34	-231.773	325.553
443ChAT_ChATcreTdTOM_211020	443_goodSection2_5_ChAT_ChATcreTdTOM_211020	5	34	0	0	0	0	907.961	1130.06	0	0	1	6099.5	7591.5	0	0	4	34	-190.093	319.599
443ChAT_ChATcreTdTOM_211020	443_goodSection2_5_ChAT_ChATcreTdTOM_211020	5	35	0	7	7	7	869.854	1153.88	0	0	1	5843.5	7751.5	0	0	4	34	-228.2	343.416
443ChAT_ChATcreTdTOM_211020	443_goodSection2_5_ChAT_ChATcreTdTOM_211020	5	36	0	15	15	15	1688.28	1162.96	0	0	1	11341.5	7812.5	0	0	4	34	590.223	352.497
443ChAT_ChATcreTdTOM_211020	443_goodSection2_5_ChAT_ChATcreTdTOM_211020	5	37	0	16	16	16	1669.22	1129.61	0	0	1	11213.5	7588.5	0	0	4	34	571.169	319.153
443ChAT_ChATcreTdTOM_211020	443_goodSection2_5_ChAT_ChATcreTdTOM_211020	5	38	0	7	7	7	1638.86	1107.58	0	0	1	11009.5	7440.5	0	0	4	34	540.802	297.121
443ChAT_ChATcreTdTOM_211020	443_goodSection2_5_ChAT_ChATcreTdTOM_211020	5	39	0	16	16	16	1585.27	1097.46	0	0	1	10649.5	7372.5	0	0	4	34	487.213	286.999
443ChAT_ChATcreTdTOM_211020	443_goodSection2_5_ChAT_ChATcreTdTOM_211020	5	40	0	21	21	21	1620.99	1123.06	0	0	1	10889.5	7544.5	0	0	4	34	522.939	312.603
443ChAT_ChATcreTdTOM_211020	443_goodSection2_5_ChAT_ChATcreTdTOM_211020	5	41	0	14	14	14	1620.4	1155.81	0	0	1	10885.5	7764.5	0	0	4	34	522.343	345.352
443ChAT_ChATcreTdTOM_211020	443_goodSection2_5_ChAT_ChATcreTdTOM_211020	5	42	0	6	6	6	1591.82	1159.98	0	0	1	10693.5	7792.5	0	0	4	34	493.763	349.52
443ChAT_ChATcreTdTOM_211020	443_goodSection2_5_ChAT_ChATcreTdTOM_211020	5	43	0	16	16	16	1683.51	1023.18	0	0	1	11309.5	6873.5	0	0	4	34	585.459	212.719
443ChAT_ChATcreTdTOM_211020	443_goodSection2_5_ChAT_ChATcreTdTOM_211020	5	44	0	6	6	6	1690.66	992.215	0	0	1	11357.5	6665.5	0	0	4	34	592.605	181.756
443ChAT_ChATcreTdTOM_211020	443_goodSection2_5_ChAT_ChATcreTdTOM_211020	5	45	0	9	9	9	1622.78	955.298	0	0	1	10901.5	6417.5	0	0	4	34	524.725	144.839
443ChAT_ChATcreTdTOM_211020	443_goodSection2_5_ChAT_ChATcreTdTOM_211020	5	46	0	10	10	10	1323.87	1110.11	0	0	1	8893.5	7457.5	0	0	4	34	225.818	299.652
443ChAT_ChATcreTdTOM_211020	443_goodSection2_5_ChAT_ChATcreTdTOM_211020	5	47	0	6	6	6	1346.5	1126.78	0	0	1	9045.5	7569.5	0	0	4	34	248.444	316.324
443ChAT_ChATcreTdTOM_211020	443_goodSection2_5_ChAT_ChATcreTdTOM_211020	5	48	0	3	3	3	1689.47	1232.92	0	0	1	11349.5	8282.5	0	0	4	34	591.414	422.46
443ChAT_ChATcreTdTOM_211020	443_goodSection2_5_ChAT_ChATcreTdTOM_211020	5	49	0	2	2	2	1815.7	1190.05	0	0	1	12197.5	7994.5	0	0	4	34	717.646	379.589
443ChAT_ChATcreTdTOM_211020	443_goodSection2_5_ChAT_ChATcreTdTOM_211020	5	50	0	3	3	3	1794.26	1151.94	0	0	1	12053.5	7738.5	0	0	4	34	696.21	341.481
443ChAT_ChATcreTdTOM_211020	443_goodSection2_5_ChAT_ChATcreTdTOM_211020	5	51	0	2	2	2	1768.07	1147.18	0	0	1	11877.5	7706.5	0	0	4	34	670.011	336.718
443ChAT_ChATcreTdTOM_211020	443_goodSection2_5_ChAT_ChATcreTdTOM_211020	5	52	0	5	5	5	1476.6	504.853	0	0	1	9919.5	3391.5	0	0	3	7	378.546	-305.606
443ChAT_ChATcreTdTOM_211020	443_goodSection2_5_ChAT_ChATcreTdTOM_211020	5	53	0	1	1	1	1574.25	581.069	0	0	1	10575.5	3903.5	0	0	3	7	476.197	-229.39
446_ChAT_ChATcreTdTOM_211020	446_Section1_2_ChAT_ChATcreTdTOM_211020	1	1	0	110	110	110	983.879	858.987	0	0	2	6609.5	5770.5	0	0	3	4	-114.175	48.528
446_ChAT_ChATcreTdTOM_211020	446_Section1_2_ChAT_ChATcreTdTOM_211020	1	2	0	22	22	22	953.512	891.14	0	0	2	6405.5	5986.5	0	0	0	1	0	0
446_ChAT_ChATcreTdTOM_211020	446_Section1_2_ChAT_ChATcreTdTOM_211020	1	3	0	53	53	53	1055.03	825.792	0	0	2	7087.5	5547.5	0	0	1	2	101.521	-65.348
446_ChAT_ChATcreTdTOM_211020	446_Section1_2_ChAT_ChATcreTdTOM_211020	1	4	0	77	77	77	531.052	863.155	0	0	2	3567.5	5798.5	0	0	1	2	-422.46	-27.985
446_ChAT_ChATcreTdTOM_211020	446_Section1_2_ChAT_ChATcreTdTOM_211020	1	5	0	36	36	36	900.221	903.198	0	0	1	6047.5	6067.5	0	0	2	12	-53.291	12.058
446_ChAT_ChATcreTdTOM_211020	446_Section1_2_ChAT_ChATcreTdTOM_211020	1	6	0	20	20	20	1093.14	854.224	0	0	1	7343.5	5738.5	0	0	2	12	139.629	-36.916
446_ChAT_ChATcreTdTOM_211020	446_Section1_2_ChAT_ChATcreTdTOM_211020	1	7	0	18	18	18	1007.4	916.744	0	0	1	6767.5	6158.5	0	0	2	12	53.887	25.604
446_ChAT_ChATcreTdTOM_211020	446_Section1_2_ChAT_ChATcreTdTOM_211020	1	8	0	20	20	20	1020.8	947.111	0	0	1	6857.5	6362.5	0	0	2	12	67.284	55.971
446_ChAT_ChATcreTdTOM_211020	446_Section1_2_ChAT_ChATcreTdTOM_211020	1	9	0	33	33	33	1201.21	1081.08	0	0	1	8069.5	7262.5	0	0	2	12	247.7	189.944
446_ChAT_ChATcreTdTOM_211020	446_Section1_2_ChAT_ChATcreTdTOM_211020	1	10	0	18	18	18	1211.04	1046.25	0	0	1	8135.5	7028.5	0	0	2	12	257.525	155.111
446_ChAT_ChATcreTdTOM_211020	446_Section1_2_ChAT_ChATcreTdTOM_211020	1	11	0	44	44	44	668.895	726.354	0	0	1	4493.5	4879.5	0	0	2	12	-284.617	-164.786
446_ChAT_ChATcreTdTOM_211020	446_Section1_2_ChAT_ChATcreTdTOM_211020	1	12	0	27	27	27	690.331	721.889	0	0	1	4637.5	4849.5	0	0	2	12	-263.181	-169.251
446_ChAT_ChATcreTdTOM_211020	446_Section1_2_ChAT_ChATcreTdTOM_211020	1	13	0	29	29	29	888.61	776.371	0	0	1	5969.5	5215.5	0	0	2	12	-64.902	-114.769
446_ChAT_ChATcreTdTOM_211020	446_Section1_2_ChAT_ChATcreTdTOM_211020	1	14	0	6	6	6	1485.98	449.627	0	0	2	9982.5	3020.5	0	0	2	12	532.466	-441.513
446_ChAT_ChATcreTdTOM_211020	446_Section1_2_ChAT_ChATcreTdTOM_211020	1	15	0	15	15	15	632.127	410.179	0	0	2	4246.5	2755.5	0	0	2	12	-321.385	-480.961
446_ChAT_ChATcreTdTOM_211020	446_Section1_2_ChAT_ChATcreTdTOM_211020	1	16	0	22	22	22	484.459	436.378	0	0	2	3254.5	2931.5	0	0	2	12	-469.053	-454.762
446_ChAT_ChATcreTdTOM_211020	446_Section1_2_ChAT_ChATcreTdTOM_211020	1	17	0	28	28	28	1277.13	746.748	0	0	1	8579.5	5016.5	0	0	3	4	323.618	-144.392
446_ChAT_ChATcreTdTOM_211020	446_Section1_2_ChAT_ChATcreTdTOM_211020	1	18	0	23	23	23	1201.36	400.057	0	0	1	8070.5	2687.5	0	0	3	4	247.849	-491.083
446_ChAT_ChATcreTdTOM_211020	446_Section1_2_ChAT_ChATcreTdTOM_211020	1	19	0	48	48	48	404.225	1146.28	0	0	1	2715.5	7700.5	0	0	4	23	-549.287	255.144
446_ChAT_ChATcreTdTOM_211020	446_Section1_2_ChAT_ChATcreTdTOM_211020	1	20	0	9	9	9	370.285	1164.15	0	0	1	2487.5	7820.5	0	0	4	23	-583.227	273.007
446_ChAT_ChATcreTdTOM_211020	446_Section1_2_ChAT_ChATcreTdTOM_211020	1	21	0	80	80	80	357.781	1196.3	0	0	1	2403.5	8036.5	0	0	4	23	-595.731	305.16
446_ChAT_ChATcreTdTOM_211020	446_Section1_2_ChAT_ChATcreTdTOM_211020	1	22	0	48	48	48	409.584	1210.59	0	0	1	2751.5	8132.5	0	0	4	23	-543.928	319.45
446_ChAT_ChATcreTdTOM_211020	446_Section1_2_ChAT_ChATcreTdTOM_211020	1	23	0	79	79	79	431.019	1176.65	0	0	1	2895.5	7904.5	0	0	4	23	-522.493	285.511
446_ChAT_ChATcreTdTOM_211020	446_Section1_2_ChAT_ChATcreTdTOM_211020	1	24	0	14	14	14	445.31	1212.38	0	0	1	2991.5	8144.5	0	0	4	23	-508.202	321.237
446_ChAT_ChATcreTdTOM_211020	446_Section1_2_ChAT_ChATcreTdTOM_211020	1	25	0	38	38	38	363.14	1271.33	0	0	1	2439.5	8540.5	0	0	4	23	-590.372	380.185
446_ChAT_ChATcreTdTOM_211020	446_Section1_2_ChAT_ChATcreTdTOM_211020	1	26	0	49	49	49	450.669	1269.54	0	0	1	3027.5	8528.5	0	0	4	23	-502.843	378.398
446_ChAT_ChATcreTdTOM_211020	446_Section1_2_ChAT_ChATcreTdTOM_211020	1	27	0	35	35	35	486.395	1117.7	0	0	1	3267.5	7508.5	0	0	4	23	-467.117	226.563
446_ChAT_ChATcreTdTOM_211020	446_Section1_2_ChAT_ChATcreTdTOM_211020	1	28	0	47	47	47	677.529	1228.45	0	0	1	4551.5	8252.5	0	0	4	23	-275.983	337.313
446_ChAT_ChATcreTdTOM_211020	446_Section1_2_ChAT_ChATcreTdTOM_211020	1	29	0	67	67	67	731.118	1178.44	0	0	1	4911.5	7916.5	0	0	4	23	-222.394	287.297
446_ChAT_ChATcreTdTOM_211020	446_Section1_2_ChAT_ChATcreTdTOM_211020	1	30	0	45	45	45	720.4	1146.28	0	0	1	4839.5	7700.5	0	0	4	23	-233.112	255.144
446_ChAT_ChATcreTdTOM_211020	446_Section1_2_ChAT_ChATcreTdTOM_211020	1	31	0	44	44	44	1129.46	1189.15	0	0	1	7587.5	7988.5	0	0	4	23	175.951	298.015
446_ChAT_ChATcreTdTOM_211020	446_Section1_2_ChAT_ChATcreTdTOM_211020	1	32	0	37	37	37	1172.33	1208.8	0	0	1	7875.5	8120.5	0	0	4	23	218.822	317.664
446_ChAT_ChATcreTdTOM_211020	446_Section1_2_ChAT_ChATcreTdTOM_211020	1	33	0	17	17	17	1424.05	1075.13	0	0	1	9566.5	7222.5	0	0	4	23	470.541	183.989
446_ChAT_ChATcreTdTOM_211020	446_Section1_2_ChAT_ChATcreTdTOM_211020	1	34	0	64	64	64	1468.12	1109.66	0	0	1	9862.5	7454.5	0	0	4	23	514.603	218.525
446_ChAT_ChATcreTdTOM_211020	446_Section1_2_ChAT_ChATcreTdTOM_211020	1	35	0	34	34	34	1455.02	1141.82	0	0	1	9774.5	7670.5	0	0	4	23	501.504	250.678
446_ChAT_ChATcreTdTOM_211020	446_Section1_2_ChAT_ChATcreTdTOM_211020	1	36	0	22	22	22	1415.72	1154.92	0	0	1	9510.5	7758.5	0	0	4	23	462.205	263.777
446_ChAT_ChATcreTdTOM_211020	446_Section1_2_ChAT_ChATcreTdTOM_211020	1	37	0	59	59	59	1459.78	1166.83	0	0	1	9806.5	7838.5	0	0	4	23	506.267	275.686
446_ChAT_ChATcreTdTOM_211020	446_Section1_2_ChAT_ChATcreTdTOM_211020	1	38	0	61	61	61	1444.3	1212.08	0	0	1	9702.5	8142.5	0	0	4	23	490.786	320.939
446_ChAT_ChATcreTdTOM_211020	446_Section1_2_ChAT_ChATcreTdTOM_211020	1	39	0	56	56	56	1480.02	1262.1	0	0	1	9942.5	8478.5	0	0	4	23	526.512	370.955
446_ChAT_ChATcreTdTOM_211020	446_Section1_2_ChAT_ChATcreTdTOM_211020	1	40	0	16	16	16	1519.32	1235.9	0	0	1	10206.5	8302.5	0	0	4	23	565.811	344.756
446_ChAT_ChATcreTdTOM_211020	446_Section1_2_ChAT_ChATcreTdTOM_211020	1	41	0	36	36	36	1565.77	1181.12	0	0	1	10518.5	7934.5	0	0	4	23	612.254	289.977
446_ChAT_ChATcreTdTOM_211020	446_Section1_2_ChAT_ChATcreTdTOM_211020	1	42	0	33	33	33	1440.72	872.682	0	0	1	9678.5	5862.5	0	0	3	4	487.213	-18.458
446_ChAT_ChATcreTdTOM_211020	446_Section1_2_ChAT_ChATcreTdTOM_211020	2	1	0	16	16	16	984.921	788.428	0	0	2	6616.5	5296.5	0	0	3	7	36.619	-52.696
446_ChAT_ChATcreTdTOM_211020	446_Section1_2_ChAT_ChATcreTdTOM_211020	2	2	0	16	16	16	948.302	841.124	0	0	2	6370.5	5650.5	0	0	0	1	0	0
446_ChAT_ChATcreTdTOM_211020	446_Section1_2_ChAT_ChATcreTdTOM_211020	2	3	0	55	55	55	1164.44	753.595	0	0	2	7822.5	5062.5	0	0	1	4	216.142	-87.529
446_ChAT_ChATcreTdTOM_211020	446_Section1_2_ChAT_ChATcreTdTOM_211020	2	4	0	31	31	31	710.724	789.321	0	0	2	4774.5	5302.5	0	0	1	4	-237.578	-51.803
446_ChAT_ChATcreTdTOM_211020	446_Section1_2_ChAT_ChATcreTdTOM_211020	2	5	0	40	40	40	1421.67	757.019	0	0	2	9550.5	5085.5	0	0	1	4	473.37	-84.105
446_ChAT_ChATcreTdTOM_211020	446_Section1_2_ChAT_ChATcreTdTOM_211020	2	6	0	50	50	50	1329.68	676.636	0	0	2	8932.5	4545.5	0	0	1	4	381.375	-164.488
446_ChAT_ChATcreTdTOM_211020	446_Section1_2_ChAT_ChATcreTdTOM_211020	2	7	0	24	24	24	1036.28	859.136	0	0	2	6961.5	5771.5	0	0	2	7	87.975	18.012
446_ChAT_ChATcreTdTOM_211020	446_Section1_2_ChAT_ChATcreTdTOM_211020	2	8	0	17	17	17	722.484	748.385	0	0	2	4853.5	5027.5	0	0	2	7	-225.818	-92.739
446_ChAT_ChATcreTdTOM_211020	446_Section1_2_ChAT_ChATcreTdTOM_211020	2	9	0	25	25	25	682.888	753.744	0	0	2	4587.5	5063.5	0	0	2	7	-265.414	-87.38
446_ChAT_ChATcreTdTOM_211020	446_Section1_2_ChAT_ChATcreTdTOM_211020	2	10	0	21	21	21	1354.83	900.072	0	0	2	9101.5	6046.5	0	0	2	7	406.532	58.948
446_ChAT_ChATcreTdTOM_211020	446_Section1_2_ChAT_ChATcreTdTOM_211020	2	11	0	9	9	9	1423.61	535.22	0	0	1	9563.5	3595.5	0	0	2	7	475.305	-305.904
446_ChAT_ChATcreTdTOM_211020	446_Section1_2_ChAT_ChATcreTdTOM_211020	2	12	0	34	34	34	1471.24	410.775	0	0	1	9883.5	2759.5	0	0	2	7	522.939	-430.349
446_ChAT_ChATcreTdTOM_211020	446_Section1_2_ChAT_ChATcreTdTOM_211020	2	13	0	215	215	215	1433.13	366.713	0	0	1	9627.5	2463.5	0	0	2	7	484.832	-474.411
446_ChAT_ChATcreTdTOM_211020	446_Section1_2_ChAT_ChATcreTdTOM_211020	2	14	0	15	15	15	436.081	465.703	0	0	1	2929.5	3128.5	0	0	3	7	-512.221	-375.421
446_ChAT_ChATcreTdTOM_211020	446_Section1_2_ChAT_ChATcreTdTOM_211020	2	15	0	29	29	29	827.876	377.579	0	0	1	5561.5	2536.5	0	0	3	7	-120.426	-463.545
446_ChAT_ChATcreTdTOM_211020	446_Section1_2_ChAT_ChATcreTdTOM_211020	2	16	0	36	36	36	842.166	374.007	0	0	1	5657.5	2512.5	0	0	3	7	-106.136	-467.117
446_ChAT_ChATcreTdTOM_211020	446_Section1_2_ChAT_ChATcreTdTOM_211020	2	17	0	16	16	16	929.695	810.757	0	0	1	6245.5	5446.5	0	0	3	7	-18.607	-30.367
446_ChAT_ChATcreTdTOM_211020	446_Section1_2_ChAT_ChATcreTdTOM_211020	2	18	0	45	45	45	959.169	756.721	0	0	1	6443.5	5083.5	0	0	3	7	10.867	-84.403
446_ChAT_ChATcreTdTOM_211020	446_Section1_2_ChAT_ChATcreTdTOM_211020	2	19	0	6	6	6	1014.54	693.754	0	0	1	6815.5	4660.5	0	0	3	7	66.242	-147.37
446_ChAT_ChATcreTdTOM_211020	446_Section1_2_ChAT_ChATcreTdTOM_211020	2	20	0	26	26	26	383.385	948.004	0	0	1	2575.5	6368.5	0	0	4	30	-564.917	106.88
446_ChAT_ChATcreTdTOM_211020	446_Section1_2_ChAT_ChATcreTdTOM_211020	2	21	0	31	31	31	307.169	976.585	0	0	1	2063.5	6560.5	0	0	4	30	-641.133	135.461
446_ChAT_ChATcreTdTOM_211020	446_Section1_2_ChAT_ChATcreTdTOM_211020	2	22	0	55	55	55	310.742	989.685	0	0	1	2087.5	6648.5	0	0	4	30	-637.56	148.561
446_ChAT_ChATcreTdTOM_211020	446_Section1_2_ChAT_ChATcreTdTOM_211020	2	23	0	19	19	19	285.734	1044.46	0	0	1	1919.5	7016.5	0	0	4	30	-662.568	203.341
446_ChAT_ChATcreTdTOM_211020	446_Section1_2_ChAT_ChATcreTdTOM_211020	2	24	0	48	48	48	361.949	1071.85	0	0	1	2431.5	7200.5	0	0	4	30	-586.353	230.73
446_ChAT_ChATcreTdTOM_211020	446_Section1_2_ChAT_ChATcreTdTOM_211020	2	25	0	73	73	73	384.576	1095.67	0	0	1	2583.5	7360.5	0	0	4	30	-563.726	254.548
446_ChAT_ChATcreTdTOM_211020	446_Section1_2_ChAT_ChATcreTdTOM_211020	2	26	0	43	43	43	440.546	1065.9	0	0	1	2959.5	7160.5	0	0	4	30	-507.756	224.776
446_ChAT_ChATcreTdTOM_211020	446_Section1_2_ChAT_ChATcreTdTOM_211020	2	27	0	45	45	45	438.165	1096.86	0	0	1	2943.5	7368.5	0	0	4	30	-510.137	255.739
446_ChAT_ChATcreTdTOM_211020	446_Section1_2_ChAT_ChATcreTdTOM_211020	2	28	0	49	49	49	378.621	1181.41	0	0	1	2543.5	7936.5	0	0	4	30	-569.681	340.29
446_ChAT_ChATcreTdTOM_211020	446_Section1_2_ChAT_ChATcreTdTOM_211020	2	29	0	48	48	48	333.368	1179.03	0	0	1	2239.5	7920.5	0	0	4	30	-614.934	337.908
446_ChAT_ChATcreTdTOM_211020	446_Section1_2_ChAT_ChATcreTdTOM_211020	2	30	0	21	21	21	301.215	1207.61	0	0	1	2023.5	8112.5	0	0	4	30	-647.087	366.489
446_ChAT_ChATcreTdTOM_211020	446_Section1_2_ChAT_ChATcreTdTOM_211020	2	31	0	8	8	8	194.037	1164.74	0	0	1	1303.5	7824.5	0	0	4	30	-754.265	323.618
446_ChAT_ChATcreTdTOM_211020	446_Section1_2_ChAT_ChATcreTdTOM_211020	2	32	0	15	15	15	209.518	1207.61	0	0	1	1407.5	8112.5	0	0	4	30	-738.784	366.489
446_ChAT_ChATcreTdTOM_211020	446_Section1_2_ChAT_ChATcreTdTOM_211020	2	33	0	32	32	32	217.854	1262.39	0	0	1	1463.5	8480.5	0	0	4	30	-730.448	421.269
446_ChAT_ChATcreTdTOM_211020	446_Section1_2_ChAT_ChATcreTdTOM_211020	2	34	0	4	4	4	258.344	1250.48	0	0	1	1735.5	8400.5	0	0	4	30	-689.958	409.36
446_ChAT_ChATcreTdTOM_211020	446_Section1_2_ChAT_ChATcreTdTOM_211020	2	35	0	2	2	2	251.198	1288.59	0	0	1	1687.5	8656.5	0	0	4	30	-697.104	447.468
446_ChAT_ChATcreTdTOM_211020	446_Section1_2_ChAT_ChATcreTdTOM_211020	2	36	0	41	41	41	631.085	1198.09	0	0	1	4239.5	8048.5	0	0	4	30	-317.217	356.962
446_ChAT_ChATcreTdTOM_211020	446_Section1_2_ChAT_ChATcreTdTOM_211020	2	37	0	13	13	13	627.512	1170.7	0	0	1	4215.5	7864.5	0	0	4	30	-320.79	329.572
446_ChAT_ChATcreTdTOM_211020	446_Section1_2_ChAT_ChATcreTdTOM_211020	2	38	0	47	47	47	637.039	1150.45	0	0	1	4279.5	7728.5	0	0	4	30	-311.263	309.328
446_ChAT_ChATcreTdTOM_211020	446_Section1_2_ChAT_ChATcreTdTOM_211020	2	39	0	7	7	7	658.475	1150.45	0	0	1	4423.5	7728.5	0	0	4	30	-289.827	309.328
446_ChAT_ChATcreTdTOM_211020	446_Section1_2_ChAT_ChATcreTdTOM_211020	2	40	0	3	3	3	694.201	1174.27	0	0	1	4663.5	7888.5	0	0	4	30	-254.101	333.145
446_ChAT_ChATcreTdTOM_211020	446_Section1_2_ChAT_ChATcreTdTOM_211020	2	41	0	42	42	42	1214.61	1165.63	0	0	1	8159.5	7830.5	0	0	4	30	266.308	324.511
446_ChAT_ChATcreTdTOM_211020	446_Section1_2_ChAT_ChATcreTdTOM_211020	2	42	0	21	21	21	1216.99	1121.57	0	0	1	8175.5	7534.5	0	0	4	30	268.689	280.449
446_ChAT_ChATcreTdTOM_211020	446_Section1_2_ChAT_ChATcreTdTOM_211020	2	43	0	58	58	58	1507.56	1143.01	0	0	1	10127.5	7678.5	0	0	4	30	559.261	301.885
446_ChAT_ChATcreTdTOM_211020	446_Section1_2_ChAT_ChATcreTdTOM_211020	2	44	0	3	3	3	1549.24	1153.73	0	0	1	10407.5	7750.5	0	0	4	30	600.941	312.603
446_ChAT_ChATcreTdTOM_211020	446_Section1_2_ChAT_ChATcreTdTOM_211020	2	45	0	29	29	29	1640.94	1132.29	0	0	1	11023.5	7606.5	0	0	4	30	692.638	291.167
446_ChAT_ChATcreTdTOM_211020	446_Section1_2_ChAT_ChATcreTdTOM_211020	2	46	0	66	66	66	1484.94	889.354	0	0	1	9975.5	5974.5	0	0	4	30	536.634	48.23
446_ChAT_ChATcreTdTOM_211020	446_Section1_2_ChAT_ChATcreTdTOM_211020	2	47	0	97	97	97	1546.86	940.561	0	0	1	10391.5	6318.5	0	0	4	30	598.559	99.437
446_ChAT_ChATcreTdTOM_211020	446_Section1_2_ChAT_ChATcreTdTOM_211020	2	48	0	12	12	12	1608.79	995.341	0	0	1	10807.5	6686.5	0	0	4	30	660.485	154.217
446_ChAT_ChATcreTdTOM_211020	446_Section1_2_ChAT_ChATcreTdTOM_211020	2	49	0	13	13	13	1538.53	982.242	0	0	1	10335.5	6598.5	0	0	4	30	590.223	141.118
446_ChAT_ChATcreTdTOM_211020	446_Section3ChAT_ChATcreTdTOM_211020	3	1	0	21	21	21	1701.38	1061.43	0	0	2	11429.5	7130.5	0	0	4	40	683.259	231.623
446_ChAT_ChATcreTdTOM_211020	446_Section3ChAT_ChATcreTdTOM_211020	3	2	0	16	16	16	1018.12	829.811	0	0	2	6839.5	5574.5	0	0	0	1	0	0
446_ChAT_ChATcreTdTOM_211020	446_Section3ChAT_ChATcreTdTOM_211020	3	3	0	14	14	14	1068.58	860.178	0	0	2	7178.5	5778.5	0	0	2	11	50.463	30.367
446_ChAT_ChATcreTdTOM_211020	446_Section3ChAT_ChATcreTdTOM_211020	3	4	0	18	18	18	838.593	839.189	0	0	2	5633.5	5637.5	0	0	2	11	-179.524	9.378
446_ChAT_ChATcreTdTOM_211020	446_Section3ChAT_ChATcreTdTOM_211020	3	5	0	52	52	52	657.135	638.677	0	0	1	4414.5	4290.5	0	0	2	11	-360.982	-191.134
446_ChAT_ChATcreTdTOM_211020	446_Section3ChAT_ChATcreTdTOM_211020	3	6	0	142	142	142	679.166	530.606	0	0	1	4562.5	3564.5	0	0	2	11	-338.951	-299.205
446_ChAT_ChATcreTdTOM_211020	446_Section3ChAT_ChATcreTdTOM_211020	3	7	0	255	255	255	536.411	380.705	0	0	1	3603.5	2557.5	0	0	2	11	-481.706	-449.106
446_ChAT_ChATcreTdTOM_211020	446_Section3ChAT_ChATcreTdTOM_211020	3	8	0	76	76	76	1351.56	1042.08	0	0	1	9079.5	7000.5	0	0	2	11	333.442	212.272
446_ChAT_ChATcreTdTOM_211020	446_Section3ChAT_ChATcreTdTOM_211020	3	9	0	86	86	86	1257.78	939.371	0	0	1	8449.5	6310.5	0	0	2	11	239.662	109.56
446_ChAT_ChATcreTdTOM_211020	446_Section3ChAT_ChATcreTdTOM_211020	3	10	0	8	8	8	1357.81	762.527	0	0	1	9121.5	5122.5	0	0	2	11	339.694	-67.284
446_ChAT_ChATcreTdTOM_211020	446_Section3ChAT_ChATcreTdTOM_211020	3	11	0	44	44	44	1464.99	650.883	0	0	1	9841.5	4372.5	0	0	2	11	446.872	-178.928
446_ChAT_ChATcreTdTOM_211020	446_Section3ChAT_ChATcreTdTOM_211020	3	12	0	6	6	6	1105.2	458.707	0	0	2	7424.5	3081.5	0	0	2	11	87.082	-371.104
446_ChAT_ChATcreTdTOM_211020	446_Section3ChAT_ChATcreTdTOM_211020	3	13	0	89	89	89	1529.44	290.199	0	0	1	10274.5	1949.5	0	0	2	11	511.328	-539.612
446_ChAT_ChATcreTdTOM_211020	446_Section3ChAT_ChATcreTdTOM_211020	3	14	0	48	48	48	968.993	807.333	0	0	1	6509.5	5423.5	0	0	3	3	-49.124	-22.478
446_ChAT_ChATcreTdTOM_211020	446_Section3ChAT_ChATcreTdTOM_211020	3	15	0	85	85	85	1000.7	796.615	0	0	1	6722.5	5351.5	0	0	3	3	-17.417	-33.196
446_ChAT_ChATcreTdTOM_211020	446_Section3ChAT_ChATcreTdTOM_211020	3	16	0	30	30	30	1310.33	951.726	0	0	1	8802.5	6393.5	0	0	3	3	292.209	121.915
446_ChAT_ChATcreTdTOM_211020	446_Section3ChAT_ChATcreTdTOM_211020	3	17	0	111	111	111	479.845	853.182	0	0	1	3223.5	5731.5	0	0	4	40	-538.272	23.371
446_ChAT_ChATcreTdTOM_211020	446_Section3ChAT_ChATcreTdTOM_211020	3	18	0	78	78	78	481.036	881.762	0	0	1	3231.5	5923.5	0	0	4	40	-537.081	51.951
446_ChAT_ChATcreTdTOM_211020	446_Section3ChAT_ChATcreTdTOM_211020	3	19	0	57	57	57	484.608	907.961	0	0	1	3255.5	6099.5	0	0	4	40	-533.509	78.15
446_ChAT_ChATcreTdTOM_211020	446_Section3ChAT_ChATcreTdTOM_211020	3	20	0	99	99	99	507.235	932.97	0	0	1	3407.5	6267.5	0	0	4	40	-510.882	103.159
446_ChAT_ChATcreTdTOM_211020	446_Section3ChAT_ChATcreTdTOM_211020	3	21	0	62	62	62	465.554	977.032	0	0	1	3127.5	6563.5	0	0	4	40	-552.563	147.221
446_ChAT_ChATcreTdTOM_211020	446_Section3ChAT_ChATcreTdTOM_211020	3	22	0	64	64	64	414.347	967.505	0	0	1	2783.5	6499.5	0	0	4	40	-603.77	137.694
446_ChAT_ChATcreTdTOM_211020	446_Section3ChAT_ChATcreTdTOM_211020	3	23	0	89	89	89	371.476	960.36	0	0	1	2495.5	6451.5	0	0	4	40	-646.641	130.549
446_ChAT_ChATcreTdTOM_211020	446_Section3ChAT_ChATcreTdTOM_211020	3	24	0	101	101	101	401.248	998.467	0	0	1	2695.5	6707.5	0	0	4	40	-616.869	168.656
446_ChAT_ChATcreTdTOM_211020	446_Section3ChAT_ChATcreTdTOM_211020	3	25	0	104	104	104	359.567	994.895	0	0	1	2415.5	6683.5	0	0	4	40	-658.55	165.084
446_ChAT_ChATcreTdTOM_211020	446_Section3ChAT_ChATcreTdTOM_211020	3	26	0	105	105	105	338.132	1043.72	0	0	1	2271.5	7011.5	0	0	4	40	-679.985	213.909
446_ChAT_ChATcreTdTOM_211020	446_Section3ChAT_ChATcreTdTOM_211020	3	27	0	33	33	33	311.933	1169.95	0	0	1	2095.5	7859.5	0	0	4	40	-706.184	340.141
446_ChAT_ChATcreTdTOM_211020	446_Section3ChAT_ChATcreTdTOM_211020	3	28	0	73	73	73	323.841	1239.02	0	0	1	2175.5	8323.5	0	0	4	40	-694.276	409.211
446_ChAT_ChATcreTdTOM_211020	446_Section3ChAT_ChATcreTdTOM_211020	3	29	0	45	45	45	446.501	1184.24	0	0	1	2999.5	7955.5	0	0	4	40	-571.616	354.432
446_ChAT_ChATcreTdTOM_211020	446_Section3ChAT_ChATcreTdTOM_211020	3	30	0	31	31	31	484.608	1203.3	0	0	1	3255.5	8083.5	0	0	4	40	-533.509	373.485
446_ChAT_ChATcreTdTOM_211020	446_Section3ChAT_ChATcreTdTOM_211020	3	31	0	73	73	73	531.052	1175.91	0	0	1	3567.5	7899.5	0	0	4	40	-487.065	346.095
446_ChAT_ChATcreTdTOM_211020	446_Section3ChAT_ChATcreTdTOM_211020	3	32	0	60	60	60	738.263	1168.76	0	0	1	4959.5	7851.5	0	0	4	40	-279.854	338.95
446_ChAT_ChATcreTdTOM_211020	446_Section3ChAT_ChATcreTdTOM_211020	3	33	0	85	85	85	790.661	1143.75	0	0	1	5311.5	7683.5	0	0	4	40	-227.456	313.942
446_ChAT_ChATcreTdTOM_211020	446_Section3ChAT_ChATcreTdTOM_211020	3	34	0	55	55	55	1541.5	831.151	0	0	1	10355.5	5583.5	0	0	4	40	523.386	1.34
446_ChAT_ChATcreTdTOM_211020	446_Section3ChAT_ChATcreTdTOM_211020	3	35	0	41	41	41	1514.11	910.939	0	0	1	10171.5	6119.5	0	0	4	40	495.996	81.128
446_ChAT_ChATcreTdTOM_211020	446_Section3ChAT_ChATcreTdTOM_211020	3	36	0	39	39	39	1553.41	924.038	0	0	1	10435.5	6207.5	0	0	4	40	535.294	94.227
446_ChAT_ChATcreTdTOM_211020	446_Section3ChAT_ChATcreTdTOM_211020	3	37	0	19	19	19	1524.83	950.237	0	0	1	10243.5	6383.5	0	0	4	40	506.713	120.426
446_ChAT_ChATcreTdTOM_211020	446_Section3ChAT_ChATcreTdTOM_211020	3	38	0	51	51	51	1573.66	952.619	0	0	1	10571.5	6399.5	0	0	4	40	555.539	122.808
446_ChAT_ChATcreTdTOM_211020	446_Section3ChAT_ChATcreTdTOM_211020	3	39	0	56	56	56	1549.84	983.581	0	0	1	10411.5	6607.5	0	0	4	40	531.722	153.77
446_ChAT_ChATcreTdTOM_211020	446_Section3ChAT_ChATcreTdTOM_211020	3	40	0	53	53	53	1503.39	1007.4	0	0	1	10099.5	6767.5	0	0	4	40	485.278	177.588
446_ChAT_ChATcreTdTOM_211020	446_Section3ChAT_ChATcreTdTOM_211020	3	41	0	79	79	79	1593.9	1006.21	0	0	1	10707.5	6759.5	0	0	4	40	575.784	176.397
446_ChAT_ChATcreTdTOM_211020	446_Section3ChAT_ChATcreTdTOM_211020	3	42	0	89	89	89	1591.52	1047.89	0	0	1	10691.5	7039.5	0	0	4	40	573.402	218.077
446_ChAT_ChATcreTdTOM_211020	446_Section3ChAT_ChATcreTdTOM_211020	3	43	0	99	99	99	1543.88	1172.93	0	0	1	10371.5	7879.5	0	0	4	40	525.767	343.118
446_ChAT_ChATcreTdTOM_211020	446_Section3ChAT_ChATcreTdTOM_211020	3	44	0	43	43	43	1651.06	1080.04	0	0	1	11091.5	7255.5	0	0	4	40	632.945	250.231
446_ChAT_ChATcreTdTOM_211020	446_Section3ChAT_ChATcreTdTOM_211020	3	45	0	60	60	60	1664.16	1105.05	0	0	1	11179.5	7423.5	0	0	4	40	646.045	275.239
446_ChAT_ChATcreTdTOM_211020	446_Section3ChAT_ChATcreTdTOM_211020	3	46	0	87	87	87	1602.24	1152.68	0	0	1	10763.5	7743.5	0	0	4	40	584.12	322.874
446_ChAT_ChATcreTdTOM_211020	446_Section3ChAT_ChATcreTdTOM_211020	3	47	0	112	112	112	1592.71	1170.55	0	0	1	10699.5	7863.5	0	0	4	40	574.593	340.737
446_ChAT_ChATcreTdTOM_211020	446_Section3ChAT_ChATcreTdTOM_211020	3	48	0	34	34	34	1599.86	1191.98	0	0	1	10747.5	8007.5	0	0	4	40	581.738	362.172
446_ChAT_ChATcreTdTOM_211020	446_Section3ChAT_ChATcreTdTOM_211020	3	49	0	101	101	101	1651.06	1152.68	0	0	1	11091.5	7743.5	0	0	4	40	632.945	322.874
446_ChAT_ChATcreTdTOM_211020	446_Section3ChAT_ChATcreTdTOM_211020	3	50	0	101	101	101	1628.44	1216.99	0	0	1	10939.5	8175.5	0	0	4	40	610.319	387.18
446_ChAT_ChATcreTdTOM_211020	446_Section3ChAT_ChATcreTdTOM_211020	3	51	0	102	102	102	1690.36	1191.98	0	0	1	11355.5	8007.5	0	0	4	40	672.244	362.172
446_ChAT_ChATcreTdTOM_211020	446_Section3ChAT_ChATcreTdTOM_211020	3	52	0	74	74	74	1721.32	1191.98	0	0	1	11563.5	8007.5	0	0	4	40	703.206	362.172
446_ChAT_ChATcreTdTOM_211020	446_Section3ChAT_ChATcreTdTOM_211020	3	53	0	34	34	34	1662.97	1239.62	0	0	1	11171.5	8327.5	0	0	4	40	644.854	409.807
446_ChAT_ChATcreTdTOM_211020	446_Section3ChAT_ChATcreTdTOM_211020	3	54	0	58	58	58	1267.6	1152.68	0	0	1	8515.5	7743.5	0	0	4	40	249.486	322.874
446_ChAT_ChATcreTdTOM_211020	446_Section3ChAT_ChATcreTdTOM_211020	3	55	0	67	67	67	1279.51	1137.2	0	0	1	8595.5	7639.5	0	0	4	40	261.395	307.392
446_ChAT_ChATcreTdTOM_211020	446_Section4ChAT_ChATcreTdTOM_211020	4	1	0	35	35	35	1240.88	805.026	0	0	2	8336	5408	0	0	0	1	0	0
446_ChAT_ChATcreTdTOM_211020	446_Section4ChAT_ChATcreTdTOM_211020	4	2	0	16	16	16	1550.14	908.259	0	0	2	10413.5	6101.5	0	0	2	10	309.253	103.233
446_ChAT_ChATcreTdTOM_211020	446_Section4ChAT_ChATcreTdTOM_211020	4	3	0	9	9	9	1515.6	876.106	0	0	2	10181.5	5885.5	0	0	2	10	274.718	71.08
446_ChAT_ChATcreTdTOM_211020	446_Section4ChAT_ChATcreTdTOM_211020	4	4	0	71	71	71	1510.84	826.685	0	0	1	10149.5	5553.5	0	0	2	10	269.955	21.659
446_ChAT_ChATcreTdTOM_211020	446_Section4ChAT_ChATcreTdTOM_211020	4	5	0	169	169	169	1803.49	435.187	0	0	1	12115.5	2923.5	0	0	2	10	562.61	-369.839
446_ChAT_ChATcreTdTOM_211020	446_Section4ChAT_ChATcreTdTOM_211020	4	6	0	54	54	54	1824.93	411.072	0	0	1	12259.5	2761.5	0	0	2	10	584.046	-393.954
446_ChAT_ChATcreTdTOM_211020	446_Section4ChAT_ChATcreTdTOM_211020	4	7	0	85	85	85	1683.81	326.223	0	0	1	11311.5	2191.5	0	0	2	10	442.928	-478.803
446_ChAT_ChATcreTdTOM_211020	446_Section4ChAT_ChATcreTdTOM_211020	4	8	0	51	51	51	1694.53	474.486	0	0	1	11383.5	3187.5	0	0	2	10	453.646	-330.54
446_ChAT_ChATcreTdTOM_211020	446_Section4ChAT_ChATcreTdTOM_211020	4	9	0	134	134	134	729.034	385.171	0	0	1	4897.5	2587.5	0	0	2	10	-511.849	-419.855
446_ChAT_ChATcreTdTOM_211020	446_Section4ChAT_ChATcreTdTOM_211020	4	10	0	20	20	20	713.552	347.659	0	0	1	4793.5	2335.5	0	0	2	10	-527.331	-457.367
446_ChAT_ChATcreTdTOM_211020	446_Section4ChAT_ChATcreTdTOM_211020	4	11	0	19	19	19	850.502	308.955	0	0	1	5713.5	2075.5	0	0	2	10	-390.381	-496.071
446_ChAT_ChATcreTdTOM_211020	446_Section4ChAT_ChATcreTdTOM_211020	4	12	0	202	202	202	1349.77	370.285	0	0	1	9067.5	2487.5	0	0	3	4	108.89	-434.741
446_ChAT_ChATcreTdTOM_211020	446_Section4ChAT_ChATcreTdTOM_211020	4	13	0	32	32	32	1790.1	604.29	0	0	1	12025.5	4059.5	0	0	3	4	549.213	-200.736
446_ChAT_ChATcreTdTOM_211020	446_Section4ChAT_ChATcreTdTOM_211020	4	14	0	6	6	6	1185.43	805.026	0	0	1	7963.5	5408	0	0	3	4	-55.45	0
446_ChAT_ChATcreTdTOM_211020	446_Section4ChAT_ChATcreTdTOM_211020	4	15	0	27	27	27	639.421	650.139	0	0	1	4295.5	4367.5	0	0	3	4	-601.462	-154.887
446_ChAT_ChATcreTdTOM_211020	446_Section4ChAT_ChATcreTdTOM_211020	4	16	0	23	23	23	603.695	984.177	0	0	1	4055.5	6611.5	0	0	4	31	-637.188	179.151
446_ChAT_ChATcreTdTOM_211020	446_Section4ChAT_ChATcreTdTOM_211020	4	17	0	21	21	21	589.405	1041.34	0	0	1	3959.5	6995.5	0	0	4	31	-651.478	236.313
446_ChAT_ChATcreTdTOM_211020	446_Section4ChAT_ChATcreTdTOM_211020	4	18	0	21	21	21	566.183	1193.17	0	0	1	3803.5	8015.5	0	0	4	31	-674.7	388.148
446_ChAT_ChATcreTdTOM_211020	446_Section4ChAT_ChATcreTdTOM_211020	4	19	0	53	53	53	625.131	1198.53	0	0	1	4199.5	8051.5	0	0	4	31	-615.752	393.507
446_ChAT_ChATcreTdTOM_211020	446_Section4ChAT_ChATcreTdTOM_211020	4	20	0	37	37	37	626.917	1157.45	0	0	1	4211.5	7775.5	0	0	4	31	-613.966	352.422
446_ChAT_ChATcreTdTOM_211020	446_Section4ChAT_ChATcreTdTOM_211020	4	21	0	41	41	41	687.651	1157.45	0	0	1	4619.5	7775.5	0	0	4	31	-553.232	352.422
446_ChAT_ChATcreTdTOM_211020	446_Section4ChAT_ChATcreTdTOM_211020	4	22	0	79	79	79	669.788	1111	0	0	1	4499.5	7463.5	0	0	4	31	-571.095	305.978
446_ChAT_ChATcreTdTOM_211020	446_Section4ChAT_ChATcreTdTOM_211020	4	23	0	70	70	70	712.659	1087.78	0	0	1	4787.5	7307.5	0	0	4	31	-528.224	282.756
446_ChAT_ChATcreTdTOM_211020	446_Section4ChAT_ChATcreTdTOM_211020	4	24	0	54	54	54	735.881	1128.87	0	0	1	4943.5	7583.5	0	0	4	31	-505.002	323.841
446_ChAT_ChATcreTdTOM_211020	446_Section4ChAT_ChATcreTdTOM_211020	4	25	0	11	11	11	482.227	1189.6	0	0	1	3239.5	7991.5	0	0	4	31	-758.656	384.575
446_ChAT_ChATcreTdTOM_211020	446_Section4ChAT_ChATcreTdTOM_211020	4	26	0	107	107	107	950.237	1136.01	0	0	1	6383.5	7631.5	0	0	4	31	-290.646	330.986
446_ChAT_ChATcreTdTOM_211020	446_Section4ChAT_ChATcreTdTOM_211020	4	27	0	45	45	45	993.108	1164.59	0	0	1	6671.5	7823.5	0	0	4	31	-247.775	359.567
446_ChAT_ChATcreTdTOM_211020	446_Section4ChAT_ChATcreTdTOM_211020	4	28	0	22	22	22	987.75	1123.51	0	0	1	6635.5	7547.5	0	0	4	31	-253.133	318.482
446_ChAT_ChATcreTdTOM_211020	446_Section4ChAT_ChATcreTdTOM_211020	4	29	0	35	35	35	1019.9	1161.02	0	0	1	6851.5	7799.5	0	0	4	31	-220.98	355.995
446_ChAT_ChATcreTdTOM_211020	446_Section4ChAT_ChATcreTdTOM_211020	4	30	0	140	140	140	1493.27	1136.01	0	0	1	10031.5	7631.5	0	0	4	31	252.389	330.986
446_ChAT_ChATcreTdTOM_211020	446_Section4ChAT_ChATcreTdTOM_211020	4	31	0	75	75	75	1509.35	1125.3	0	0	1	10139.5	7559.5	0	0	4	31	268.466	320.269
446_ChAT_ChATcreTdTOM_211020	446_Section4ChAT_ChATcreTdTOM_211020	4	32	0	6	6	6	1689.77	1091.36	0	0	1	11351.5	7331.5	0	0	4	31	448.882	286.329
446_ChAT_ChATcreTdTOM_211020	446_Section4ChAT_ChATcreTdTOM_211020	4	33	0	28	28	28	1700.48	1066.35	0	0	1	11423.5	7163.5	0	0	4	31	459.6	261.321
446_ChAT_ChATcreTdTOM_211020	446_Section4ChAT_ChATcreTdTOM_211020	4	34	0	7	7	7	1716.56	1094.93	0	0	1	11531.5	7355.5	0	0	4	31	475.677	289.902
446_ChAT_ChATcreTdTOM_211020	446_Section4ChAT_ChATcreTdTOM_211020	4	35	0	30	30	30	1780.87	1132.44	0	0	1	11963.5	7607.5	0	0	4	31	539.984	327.414
446_ChAT_ChATcreTdTOM_211020	446_Section4ChAT_ChATcreTdTOM_211020	4	36	0	65	65	65	1805.88	1137.8	0	0	1	12131.5	7643.5	0	0	4	31	564.992	332.773
446_ChAT_ChATcreTdTOM_211020	446_Section4ChAT_ChATcreTdTOM_211020	4	37	0	13	13	13	1932.7	1132.44	0	0	1	12983.5	7607.5	0	0	4	31	691.819	327.414
446_ChAT_ChATcreTdTOM_211020	446_Section4ChAT_ChATcreTdTOM_211020	4	38	0	64	64	64	1977.36	1112.79	0	0	1	13283.5	7475.5	0	0	4	31	736.477	307.765
446_ChAT_ChATcreTdTOM_211020	446_Section4ChAT_ChATcreTdTOM_211020	4	39	0	72	72	72	1970.21	1150.3	0	0	1	13235.5	7727.5	0	0	4	31	729.332	345.277
446_ChAT_ChATcreTdTOM_211020	446_Section4ChAT_ChATcreTdTOM_211020	4	40	0	5	5	5	1945.21	1012.76	0	0	1	13067.5	6803.5	0	0	4	31	704.323	207.732
446_ChAT_ChATcreTdTOM_211020	446_Section4ChAT_ChATcreTdTOM_211020	4	41	0	22	22	22	1864.82	994.895	0	0	1	12527.5	6683.5	0	0	4	31	623.94	189.869
446_ChAT_ChATcreTdTOM_211020	446_Section4ChAT_ChATcreTdTOM_211020	4	42	0	112	112	112	1820.16	987.75	0	0	1	12227.5	6635.5	0	0	4	31	579.282	182.724
446_ChAT_ChATcreTdTOM_211020	446_Section4ChAT_ChATcreTdTOM_211020	4	43	0	126	126	126	1782.65	946.665	0	0	1	11975.5	6359.5	0	0	4	31	541.77	141.639
446_ChAT_ChATcreTdTOM_211020	446_Section4ChAT_ChATcreTdTOM_211020	4	44	0	60	60	60	1782.65	916.298	0	0	1	11975.5	6155.5	0	0	4	31	541.77	111.272
446_ChAT_ChATcreTdTOM_211020	446_Section4ChAT_ChATcreTdTOM_211020	4	45	0	75	75	75	1807.66	927.015	0	0	1	12143.5	6227.5	0	0	4	31	566.778	121.989
446_ChAT_ChATcreTdTOM_211020	446_Section4ChAT_ChATcreTdTOM_211020	4	46	0	22	22	22	1905.91	964.528	0	0	1	12803.5	6479.5	0	0	4	31	665.025	159.502
446_ChAT_ChATcreTdTOM_211020	446_Section5ChAT_ChATcreTdTOM_211020	5	1	0	27	27	27	967.877	828.397	0	0	2	6502	5565	0	0	0	1	0	0
446_ChAT_ChATcreTdTOM_211020	446_Section5ChAT_ChATcreTdTOM_211021	5	2	0	1	1	1	354.06	521.525	0	0	1	2378.5	3503.5	0	0	2	11	-613.817	-306.872
446_ChAT_ChATcreTdTOM_211020	446_Section5ChAT_ChATcreTdTOM_211022	5	3	0	117	117	117	494.284	419.706	0	0	1	3320.5	2819.5	0	0	2	11	-473.593	-408.691
446_ChAT_ChATcreTdTOM_211020	446_Section5ChAT_ChATcreTdTOM_211023	5	4	0	254	254	254	454.986	450.073	0	0	1	3056.5	3023.5	0	0	2	11	-512.891	-378.324
446_ChAT_ChATcreTdTOM_211020	446_Section5ChAT_ChATcreTdTOM_211024	5	5	0	46	46	46	691.67	400.057	0	0	1	4646.5	2687.5	0	0	2	11	-276.207	-428.34
446_ChAT_ChATcreTdTOM_211020	446_Section5ChAT_ChATcreTdTOM_211025	5	6	0	25	25	25	904.687	869.407	0	0	1	6077.5	5840.5	0	0	2	11	-63.19	41.01
446_ChAT_ChATcreTdTOM_211020	446_Section5ChAT_ChATcreTdTOM_211026	5	7	0	62	62	62	1010.08	842.613	0	0	1	6785.5	5660.5	0	0	2	11	42.201	14.216
446_ChAT_ChATcreTdTOM_211020	446_Section5ChAT_ChATcreTdTOM_211027	5	8	0	15	15	15	1131.55	790.363	0	0	1	7601.5	5309.5	0	0	2	11	163.67	-38.034
446_ChAT_ChATcreTdTOM_211020	446_Section5ChAT_ChATcreTdTOM_211028	5	9	0	46	46	46	1331.76	1124.4	0	0	1	8946.5	7553.5	0	0	2	11	363.884	296.004
446_ChAT_ChATcreTdTOM_211020	446_Section5ChAT_ChATcreTdTOM_211029	5	10	0	81	81	81	1531.68	473.146	0	0	1	10289.5	3178.5	0	0	2	11	563.801	-355.251
446_ChAT_ChATcreTdTOM_211020	446_Section5ChAT_ChATcreTdTOM_211030	5	11	0	25	25	25	1500.42	391.87	0	0	1	10079.5	2632.5	0	0	2	11	532.541	-436.527
446_ChAT_ChATcreTdTOM_211020	446_Section5ChAT_ChATcreTdTOM_211031	5	12	0	10	10	10	1490	476.57	0	0	1	10009.5	3201.5	0	0	3	10	522.121	-351.827
446_ChAT_ChATcreTdTOM_211020	446_Section5ChAT_ChATcreTdTOM_211032	5	13	0	52	52	52	1410.81	655.795	0	0	1	9477.5	4405.5	0	0	3	10	442.928	-172.602
446_ChAT_ChATcreTdTOM_211020	446_Section5ChAT_ChATcreTdTOM_211033	5	14	0	27	27	27	1317.47	712.957	0	0	1	8850.5	4789.5	0	0	3	10	349.594	-115.44
446_ChAT_ChATcreTdTOM_211020	446_Section5ChAT_ChATcreTdTOM_211034	5	15	0	41	41	41	1063.82	631.978	0	0	1	7146.5	4245.5	0	0	3	10	95.939	-196.419
446_ChAT_ChATcreTdTOM_211020	446_Section5ChAT_ChATcreTdTOM_211035	5	16	0	20	20	20	872.831	797.806	0	0	1	5863.5	5359.5	0	0	3	10	-95.046	-30.591
446_ChAT_ChATcreTdTOM_211020	446_Section5ChAT_ChATcreTdTOM_211036	5	17	0	31	31	31	904.091	800.486	0	0	1	6073.5	5377.5	0	0	3	10	-63.786	-27.911
446_ChAT_ChATcreTdTOM_211020	446_Section5ChAT_ChATcreTdTOM_211037	5	18	0	7	7	7	788.875	806.738	0	0	1	5299.5	5419.5	0	0	3	10	-179.002	-21.659
446_ChAT_ChATcreTdTOM_211020	446_Section5ChAT_ChATcreTdTOM_211038	5	19	0	32	32	32	493.242	679.91	0	0	1	3313.5	4567.5	0	0	3	10	-474.635	-148.487
446_ChAT_ChATcreTdTOM_211020	446_Section5ChAT_ChATcreTdTOM_211039	5	20	0	17	17	17	437.42	471.807	0	0	1	2938.5	3169.5	0	0	3	10	-530.457	-356.59
446_ChAT_ChATcreTdTOM_211020	446_Section5ChAT_ChATcreTdTOM_211040	5	21	0	27	27	27	502.62	446.798	0	0	1	3376.5	3001.5	0	0	3	10	-465.257	-381.599
446_ChAT_ChATcreTdTOM_211020	446_Section5ChAT_ChATcreTdTOM_211041	5	22	0	86	86	86	361.949	878.785	0	0	1	2431.5	5903.5	0	0	4	48	-605.928	50.388
446_ChAT_ChATcreTdTOM_211020	446_Section5ChAT_ChATcreTdTOM_211042	5	23	0	61	61	61	441.737	872.831	0	0	1	2967.5	5863.5	0	0	4	48	-526.14	44.434
446_ChAT_ChATcreTdTOM_211020	446_Section5ChAT_ChATcreTdTOM_211043	5	24	0	51	51	51	422.683	906.175	0	0	1	2839.5	6087.5	0	0	4	48	-545.194	77.778
446_ChAT_ChATcreTdTOM_211020	446_Section5ChAT_ChATcreTdTOM_211044	5	25	0	37	37	37	419.111	974.055	0	0	1	2815.5	6543.5	0	0	4	48	-548.766	145.658
446_ChAT_ChATcreTdTOM_211020	446_Section5ChAT_ChATcreTdTOM_211045	5	26	0	20	20	20	367.903	1010.97	0	0	1	2471.5	6791.5	0	0	4	48	-599.974	182.574
446_ChAT_ChATcreTdTOM_211020	446_Section5ChAT_ChATcreTdTOM_211046	5	27	0	80	80	80	319.078	997.872	0	0	1	2143.5	6703.5	0	0	4	48	-648.799	169.475
446_ChAT_ChATcreTdTOM_211020	446_Section5ChAT_ChATcreTdTOM_211047	5	28	0	42	42	42	269.061	1063.37	0	0	1	1807.5	7143.5	0	0	4	48	-698.816	234.973
446_ChAT_ChATcreTdTOM_211020	446_Section5ChAT_ChATcreTdTOM_211048	5	29	0	75	75	75	379.812	1050.27	0	0	1	2551.5	7055.5	0	0	4	48	-588.065	221.873
446_ChAT_ChATcreTdTOM_211020	446_Section5ChAT_ChATcreTdTOM_211049	5	30	0	31	31	31	314.314	1078.85	0	0	1	2111.5	7247.5	0	0	4	48	-653.563	250.454
446_ChAT_ChATcreTdTOM_211020	446_Section5ChAT_ChATcreTdTOM_211050	5	31	0	86	86	86	352.422	1155.07	0	0	1	2367.5	7759.5	0	0	4	48	-615.455	326.669
446_ChAT_ChATcreTdTOM_211020	446_Section5ChAT_ChATcreTdTOM_211051	5	32	0	55	55	55	332.177	1178.88	0	0	1	2231.5	7919.5	0	0	4	48	-635.7	350.487
446_ChAT_ChATcreTdTOM_211020	446_Section5ChAT_ChATcreTdTOM_211052	5	33	0	24	24	24	297.642	1200.32	0	0	1	1999.5	8063.5	0	0	4	48	-670.235	371.922
446_ChAT_ChATcreTdTOM_211020	446_Section5ChAT_ChATcreTdTOM_211053	5	34	0	77	77	77	334.559	1250.34	0	0	1	2247.5	8399.5	0	0	4	48	-633.318	421.939
446_ChAT_ChATcreTdTOM_211020	446_Section5ChAT_ChATcreTdTOM_211054	5	35	0	70	70	70	409.584	1137.2	0	0	1	2751.5	7639.5	0	0	4	48	-558.293	308.806
446_ChAT_ChATcreTdTOM_211020	446_Section5ChAT_ChATcreTdTOM_211055	5	36	0	68	68	68	438.165	1119.34	0	0	1	2943.5	7519.5	0	0	4	48	-529.712	290.943
446_ChAT_ChATcreTdTOM_211020	446_Section5ChAT_ChATcreTdTOM_211056	5	37	0	52	52	52	481.036	1137.2	0	0	1	3231.5	7639.5	0	0	4	48	-486.841	308.806
446_ChAT_ChATcreTdTOM_211020	446_Section5ChAT_ChATcreTdTOM_211057	5	38	0	39	39	39	452.455	1155.07	0	0	1	3039.5	7759.5	0	0	4	48	-515.422	326.669
446_ChAT_ChATcreTdTOM_211020	446_Section5ChAT_ChATcreTdTOM_211058	5	39	0	7	7	7	447.691	1214.61	0	0	1	3007.5	8159.5	0	0	4	48	-520.186	386.213
446_ChAT_ChATcreTdTOM_211020	446_Section5ChAT_ChATcreTdTOM_211059	5	40	0	101	101	101	511.998	1144.35	0	0	1	3439.5	7687.5	0	0	4	48	-455.879	315.951
446_ChAT_ChATcreTdTOM_211020	446_Section5ChAT_ChATcreTdTOM_211060	5	41	0	35	35	35	720.4	1161.02	0	0	1	4839.5	7799.5	0	0	4	48	-247.477	332.624
446_ChAT_ChATcreTdTOM_211020	446_Section5ChAT_ChATcreTdTOM_211061	5	42	0	7	7	7	712.064	1196.75	0	0	1	4783.5	8039.5	0	0	4	48	-255.813	368.35
446_ChAT_ChATcreTdTOM_211020	446_Section5ChAT_ChATcreTdTOM_211062	5	43	0	24	24	24	702.984	1103.86	0	0	1	4722.5	7415.5	0	0	2	11	-264.893	275.462
446_ChAT_ChATcreTdTOM_211020	446_Section5ChAT_ChATcreTdTOM_211063	5	44	0	49	49	49	1159.38	1117.26	0	0	1	7788.5	7505.5	0	0	4	48	191.506	288.859
446_ChAT_ChATcreTdTOM_211020	446_Section5ChAT_ChATcreTdTOM_211064	5	45	0	80	80	80	1170.1	1141.37	0	0	1	7860.5	7667.5	0	0	4	48	202.224	312.974
446_ChAT_ChATcreTdTOM_211020	446_Section5ChAT_ChATcreTdTOM_211065	5	46	0	33	33	33	1196.89	1168.17	0	0	1	8040.5	7847.5	0	0	4	48	229.018	339.769
446_ChAT_ChATcreTdTOM_211020	446_Section5ChAT_ChATcreTdTOM_211066	5	47	0	64	64	64	1426.43	1152.09	0	0	1	9582.5	7739.5	0	0	4	48	458.558	323.692
446_ChAT_ChATcreTdTOM_211020	446_Section5ChAT_ChATcreTdTOM_211067	5	48	0	38	38	38	1445.19	1137.8	0	0	1	9708.5	7643.5	0	0	4	48	477.314	309.402
446_ChAT_ChATcreTdTOM_211020	446_Section5ChAT_ChATcreTdTOM_211068	5	49	0	78	78	78	1489.85	1166.38	0	0	1	10008.5	7835.5	0	0	4	48	521.972	337.983
446_ChAT_ChATcreTdTOM_211020	446_Section5ChAT_ChATcreTdTOM_211069	5	50	0	7	7	7	1488.06	1208.36	0	0	1	9996.5	8117.5	0	0	4	48	520.185	379.961
446_ChAT_ChATcreTdTOM_211020	446_Section5ChAT_ChATcreTdTOM_211070	5	51	0	44	44	44	1522	1243.19	0	0	1	10224.5	8351.5	0	0	4	48	554.125	414.793
446_ChAT_ChATcreTdTOM_211020	446_Section5ChAT_ChATcreTdTOM_211071	5	52	0	64	64	64	1646.45	1255.1	0	0	1	11060.5	8431.5	0	0	4	48	678.571	426.702
446_ChAT_ChATcreTdTOM_211020	446_Section5ChAT_ChATcreTdTOM_211072	5	53	0	20	20	20	1647.64	1227.71	0	0	1	11068.5	8247.5	0	0	4	48	679.762	399.312
446_ChAT_ChATcreTdTOM_211020	446_Section5ChAT_ChATcreTdTOM_211073	5	54	0	39	39	39	1665.5	1157.45	0	0	1	11188.5	7775.5	0	0	4	48	697.625	329.051
446_ChAT_ChATcreTdTOM_211020	446_Section5ChAT_ChATcreTdTOM_211074	5	55	0	33	33	33	1627.39	1181.27	0	0	1	10932.5	7935.5	0	0	4	48	659.517	352.868
446_ChAT_ChATcreTdTOM_211020	446_Section5ChAT_ChATcreTdTOM_211075	5	56	0	39	39	39	1622.63	1034.79	0	0	1	10900.5	6951.5	0	0	4	48	654.753	206.392
446_ChAT_ChATcreTdTOM_211020	446_Section5ChAT_ChATcreTdTOM_211076	5	57	0	59	59	59	1671.46	970.482	0	0	1	11228.5	6519.5	0	0	4	48	703.579	142.085
446_ChAT_ChATcreTdTOM_211020	446_Section5ChAT_ChATcreTdTOM_211077	5	58	0	3	3	3	1673.84	910.939	0	0	1	11244.5	6119.5	0	0	4	48	705.961	82.542
446_ChAT_ChATcreTdTOM_211020	446_Section5ChAT_ChATcreTdTOM_211078	5	59	0	44	44	44	1620.25	920.466	0	0	1	10884.5	6183.5	0	0	4	48	652.372	92.069
446_ChAT_ChATcreTdTOM_211020	446_Section5ChAT_ChATcreTdTOM_211079	5	60	0	9	9	9	1634.54	972.864	0	0	1	10980.5	6535.5	0	0	4	48	666.662	144.467
446_ChAT_ChATcreTdTOM_211020	446_Section5ChAT_ChATcreTdTOM_211080	5	61	0	13	13	13	1609.53	993.108	0	0	1	10812.5	6671.5	0	0	4	48	641.654	164.711
446_ChAT_ChATcreTdTOM_211020	446_Section5ChAT_ChATcreTdTOM_211081	5	62	0	6	6	6	1545.22	981.2	0	0	1	10380.5	6591.5	0	0	4	48	577.347	152.803
446_ChAT_ChATcreTdTOM_211020	446_Section5ChAT_ChATcreTdTOM_211082	5	63	0	27	27	27	1558.32	921.656	0	0	1	10468.5	6191.5	0	0	4	48	590.447	93.259
446_ChAT_ChATcreTdTOM_211020	446_Section5ChAT_ChATcreTdTOM_211083	5	64	0	25	25	25	1583.33	912.129	0	0	1	10636.5	6127.5	0	0	4	48	615.455	83.732
446_ChAT_ChATcreTdTOM_211020	446_Section5ChAT_ChATcreTdTOM_211084	5	65	0	22	22	22	1471.39	928.802	0	0	1	9884.5	6239.5	0	0	4	48	503.513	100.405
446_ChAT_ChATcreTdTOM_211020	446_Section5ChAT_ChATcreTdTOM_211085	5	66	0	45	45	45	1478.54	878.785	0	0	1	9932.5	5903.5	0	0	4	48	510.658	50.388
446_ChAT_ChATcreTdTOM_211020	446_Section5ChAT_ChATcreTdTOM_211086	5	67	0	37	37	37	1509.5	888.312	0	0	1	10140.5	5967.5	0	0	4	48	541.621	59.915
446_ChAT_ChATcreTdTOM_211020	446_Section5ChAT_ChATcreTdTOM_211087	5	68	0	44	44	44	1502.35	869.258	0	0	1	10092.5	5839.5	0	0	4	48	534.476	40.861
446_ChAT_ChATcreTdTOM_211020	446_Section5ChAT_ChATcreTdTOM_211088	5	69	0	40	40	40	1479.73	828.769	0	0	1	9940.5	5567.5	0	0	4	48	511.849	0.372
446_ChAT_ChATcreTdTOM_211020	446_Section5ChAT_ChATcreTdTOM_211089	5	70	0	6	6	6	1434.47	884.74	0	0	1	9636.5	5943.5	0	0	4	48	466.596	56.343
445_ChAT_ChATcreTdTOM_171020	445_Section2_ChAT_ChATcreTdTOM_171020	1	1	0	24	24	24	923.517	557.326	0	0	2	6204	3744	0	0	0	1	0	0
445_ChAT_ChATcreTdTOM_171020	445_Section2_ChAT_ChATcreTdTOM_171020	1	2	0	30	30	30	680.357	853.33	0	0	1	4570.5	5732.5	0	0	2	18	-243.16	296.004
445_ChAT_ChATcreTdTOM_171020	445_Section2_ChAT_ChATcreTdTOM_171020	1	3	0	29	29	29	680.357	813.436	0	0	1	4570.5	5464.5	0	0	2	18	-243.16	256.11
445_ChAT_ChATcreTdTOM_171020	445_Section2_ChAT_ChATcreTdTOM_171020	1	4	0	59	59	59	633.913	758.657	0	0	1	4258.5	5096.5	0	0	2	18	-289.604	201.331
445_ChAT_ChATcreTdTOM_171020	445_Section2_ChAT_ChATcreTdTOM_171020	1	5	0	30	30	30	639.57	540.579	0	0	1	4296.5	3631.5	0	0	2	18	-283.947	-16.747
445_ChAT_ChATcreTdTOM_171020	445_Section2_ChAT_ChATcreTdTOM_171020	1	6	0	19	19	19	454.837	404.82	0	0	1	3055.5	2719.5	0	0	2	18	-468.68	-152.506
445_ChAT_ChATcreTdTOM_171020	445_Section2_ChAT_ChATcreTdTOM_171020	1	7	0	64	64	64	594.764	258.344	0	0	1	3995.5	1735.5	0	0	2	18	-328.753	-298.982
445_ChAT_ChATcreTdTOM_171020	445_Section2_ChAT_ChATcreTdTOM_171020	1	8	0	22	22	22	457.218	125.562	0	0	1	3071.5	843.5	0	0	2	18	-466.299	-431.764
445_ChAT_ChATcreTdTOM_171020	445_Section2_ChAT_ChATcreTdTOM_171020	1	9	0	3	3	3	503.067	133.303	0	0	1	3379.5	895.5	0	0	2	18	-420.45	-424.023
445_ChAT_ChATcreTdTOM_171020	445_Section2_ChAT_ChATcreTdTOM_171020	1	10	0	9	9	9	579.878	78.523	0	0	1	3895.5	527.5	0	0	2	18	-343.639	-478.803
445_ChAT_ChATcreTdTOM_171020	445_Section2_ChAT_ChATcreTdTOM_171020	1	11	0	24	24	24	1060.69	80.905	0	0	1	7125.5	543.5	0	0	2	18	137.173	-476.421
445_ChAT_ChATcreTdTOM_171020	445_Section2_ChAT_ChATcreTdTOM_171020	1	12	0	32	32	32	1151.79	42.201	0	0	1	7737.5	283.5	0	0	2	18	228.274	-515.125
445_ChAT_ChATcreTdTOM_171020	445_Section2_ChAT_ChATcreTdTOM_171020	1	13	0	255	255	255	1399.79	163.372	0	0	1	9403.5	1097.5	0	0	2	18	476.272	-393.954
445_ChAT_ChATcreTdTOM_171020	445_Section2_ChAT_ChATcreTdTOM_171020	1	14	0	180	180	180	1444.45	173.494	0	0	1	9703.5	1165.5	0	0	2	18	520.93	-383.832
445_ChAT_ChATcreTdTOM_171020	445_Section2_ChAT_ChATcreTdTOM_171020	1	15	0	53	53	53	1147.92	351.231	0	0	1	7711.5	2359.5	0	0	2	18	224.404	-206.095
445_ChAT_ChATcreTdTOM_171020	445_Section2_ChAT_ChATcreTdTOM_171020	1	16	0	5	5	5	1092.25	718.911	0	0	1	7337.5	4829.5	0	0	2	18	168.731	161.585
445_ChAT_ChATcreTdTOM_171020	445_Section2_ChAT_ChATcreTdTOM_171020	1	17	0	22	22	22	1117.7	723.824	0	0	1	7508.5	4862.5	0	0	2	18	194.186	166.498
445_ChAT_ChATcreTdTOM_171020	445_Section2_ChAT_ChATcreTdTOM_171020	1	18	0	21	21	21	1412.59	594.764	0	0	1	9489.5	3995.5	0	0	2	18	489.074	37.438
445_ChAT_ChATcreTdTOM_171020	445_Section2_ChAT_ChATcreTdTOM_171020	1	19	0	24	24	24	1278.02	662.643	0	0	1	8585.5	4451.5	0	0	2	18	354.506	105.317
445_ChAT_ChATcreTdTOM_171020	445_Section2_ChAT_ChATcreTdTOM_171020	1	20	0	21	21	21	856.903	477.761	0	0	1	5756.5	3209.5	0	0	3	11	-66.614	-79.565
445_ChAT_ChATcreTdTOM_171020	445_Section2_ChAT_ChATcreTdTOM_171020	1	21	0	9	9	9	873.426	547.873	0	0	1	5867.5	3680.5	0	0	3	11	-50.091	-9.453
445_ChAT_ChATcreTdTOM_171020	445_Section2_ChAT_ChATcreTdTOM_171020	1	22	0	11	11	11	539.984	411.072	0	0	1	3627.5	2761.5	0	0	3	11	-383.533	-146.254
445_ChAT_ChATcreTdTOM_171020	445_Section2_ChAT_ChATcreTdTOM_171020	1	23	0	14	14	14	385.766	396.782	0	0	1	2591.5	2665.5	0	0	3	11	-537.751	-160.544
445_ChAT_ChATcreTdTOM_171020	445_Section2_ChAT_ChATcreTdTOM_171020	1	24	0	49	49	49	1232.47	388.148	0	0	1	8279.5	2607.5	0	0	3	11	308.956	-169.178
445_ChAT_ChATcreTdTOM_171020	445_Section2_ChAT_ChATcreTdTOM_171020	1	25	0	31	31	31	1322.38	250.603	0	0	1	8883.5	1683.5	0	0	3	11	398.866	-306.723
445_ChAT_ChATcreTdTOM_171020	445_Section2_ChAT_ChATcreTdTOM_171020	1	26	0	20	20	20	447.245	245.095	0	0	1	3004.5	1646.5	0	0	3	11	-476.272	-312.231
445_ChAT_ChATcreTdTOM_171020	445_Section2_ChAT_ChATcreTdTOM_171020	1	27	0	36	36	36	1545.08	274.569	0	0	1	10379.5	1844.5	0	0	3	11	621.558	-282.757
445_ChAT_ChATcreTdTOM_171020	445_Section2_ChAT_ChATcreTdTOM_171020	1	28	0	16	16	16	1570.53	214.728	0	0	1	10550.5	1442.5	0	0	3	11	647.013	-342.598
445_ChAT_ChATcreTdTOM_171020	445_Section2_ChAT_ChATcreTdTOM_171020	1	29	0	93	93	93	261.916	538.197	0	0	1	1759.5	3615.5	0	0	4	28	-661.601	-19.129
445_ChAT_ChATcreTdTOM_171020	445_Section2_ChAT_ChATcreTdTOM_171020	1	30	0	29	29	29	216.663	557.251	0	0	1	1455.5	3743.5	0	0	4	28	-706.854	-0.075
445_ChAT_ChATcreTdTOM_171020	445_Section2_ChAT_ChATcreTdTOM_171020	1	31	0	34	34	34	230.954	583.45	0	0	1	1551.5	3919.5	0	0	4	28	-692.563	26.124
445_ChAT_ChATcreTdTOM_171020	445_Section2_ChAT_ChATcreTdTOM_171020	1	32	0	76	76	76	261.916	607.268	0	0	1	1759.5	4079.5	0	0	4	28	-661.601	49.942
445_ChAT_ChATcreTdTOM_171020	445_Section2_ChAT_ChATcreTdTOM_171020	1	33	0	7	7	7	266.68	681.101	0	0	1	1791.5	4575.5	0	0	4	28	-656.837	123.775
445_ChAT_ChATcreTdTOM_171020	445_Section2_ChAT_ChATcreTdTOM_171020	1	34	0	46	46	46	199.991	650.139	0	0	1	1343.5	4367.5	0	0	4	28	-723.526	92.813
445_ChAT_ChATcreTdTOM_171020	445_Section2_ChAT_ChATcreTdTOM_171020	1	35	0	49	49	49	173.792	642.994	0	0	1	1167.5	4319.5	0	0	4	28	-749.725	85.668
445_ChAT_ChATcreTdTOM_171020	445_Section2_ChAT_ChATcreTdTOM_171020	1	36	0	46	46	46	330.987	843.059	0	0	1	2223.5	5663.5	0	0	4	28	-592.53	285.733
445_ChAT_ChATcreTdTOM_171020	445_Section2_ChAT_ChATcreTdTOM_171020	1	37	0	55	55	55	307.169	921.656	0	0	1	2063.5	6191.5	0	0	4	28	-616.348	364.33
445_ChAT_ChATcreTdTOM_171020	445_Section2_ChAT_ChATcreTdTOM_171020	1	38	0	61	61	61	1438.49	907.366	0	0	1	9663.5	6095.5	0	0	4	28	514.976	350.04
445_ChAT_ChATcreTdTOM_171020	445_Section2_ChAT_ChATcreTdTOM_171020	1	39	0	10	10	10	1481.36	914.511	0	0	1	9951.5	6143.5	0	0	4	28	557.847	357.185
445_ChAT_ChATcreTdTOM_171020	445_Section2_ChAT_ChATcreTdTOM_171020	1	40	0	73	73	73	1509.94	938.329	0	0	1	10143.5	6303.5	0	0	4	28	586.428	381.003
445_ChAT_ChATcreTdTOM_171020	445_Section2_ChAT_ChATcreTdTOM_171020	1	41	0	10	10	10	1436.11	950.237	0	0	1	9647.5	6383.5	0	0	4	28	512.594	392.911
445_ChAT_ChATcreTdTOM_171020	445_Section2_ChAT_ChATcreTdTOM_171020	1	42	0	16	16	16	1495.65	964.528	0	0	1	10047.5	6479.5	0	0	4	28	572.137	407.202
445_ChAT_ChATcreTdTOM_171020	445_Section2_ChAT_ChATcreTdTOM_171020	1	43	0	62	62	62	1502.8	985.963	0	0	1	10095.5	6623.5	0	0	4	28	579.282	428.637
445_ChAT_ChATcreTdTOM_171020	445_Section2_ChAT_ChATcreTdTOM_171020	1	44	0	15	15	15	1540.91	988.345	0	0	1	10351.5	6639.5	0	0	4	28	617.39	431.019
445_ChAT_ChATcreTdTOM_171020	445_Section2_ChAT_ChATcreTdTOM_171020	1	45	0	14	14	14	1569.49	950.237	0	0	1	10543.5	6383.5	0	0	4	28	645.971	392.911
445_ChAT_ChATcreTdTOM_171020	445_Section2_ChAT_ChATcreTdTOM_171020	1	46	0	29	29	29	1588.54	907.366	0	0	1	10671.5	6095.5	0	0	4	28	665.025	350.04
445_ChAT_ChATcreTdTOM_171020	445_Section2_ChAT_ChATcreTdTOM_171020	1	47	0	32	32	32	1581.4	781.134	0	0	1	10623.5	5247.5	0	0	4	28	657.88	223.808
445_ChAT_ChATcreTdTOM_171020	445_Section2_ChAT_ChATcreTdTOM_171020	1	48	0	61	61	61	1543.29	766.844	0	0	1	10367.5	5151.5	0	0	4	28	619.772	209.518
445_ChAT_ChATcreTdTOM_171020	445_Section2_ChAT_ChATcreTdTOM_171020	1	49	0	25	25	25	1490.89	738.263	0	0	1	10015.5	4959.5	0	0	4	28	567.374	180.937
445_ChAT_ChATcreTdTOM_171020	445_Section2_ChAT_ChATcreTdTOM_171020	1	50	0	23	23	23	1583.78	735.881	0	0	1	10639.5	4943.5	0	0	4	28	660.261	178.555
445_ChAT_ChATcreTdTOM_171020	445_Section2_ChAT_ChATcreTdTOM_171020	1	51	0	11	11	11	1574.25	700.155	0	0	1	10575.5	4703.5	0	0	4	28	650.734	142.829
445_ChAT_ChATcreTdTOM_171020	445_Section2_ChAT_ChATcreTdTOM_171020	1	52	0	20	20	20	1559.96	676.338	0	0	1	10479.5	4543.5	0	0	4	28	636.444	119.012
445_ChAT_ChATcreTdTOM_171020	445_Section2_ChAT_ChATcreTdTOM_171020	1	53	0	32	32	32	1598.07	607.268	0	0	1	10735.5	4079.5	0	0	4	28	674.552	49.942
445_ChAT_ChATcreTdTOM_171020	445_Section2_ChAT_ChATcreTdTOM_171020	1	54	0	83	83	83	1624.27	631.085	0	0	1	10911.5	4239.5	0	0	4	28	700.751	73.759
445_ChAT_ChATcreTdTOM_171020	445_Section2_ChAT_ChATcreTdTOM_171020	1	55	0	16	16	16	1645.7	721.591	0	0	1	11055.5	4847.5	0	0	4	28	722.186	164.265
445_ChAT_ChATcreTdTOM_171020	445_Section2_ChAT_ChATcreTdTOM_171020	1	56	0	102	102	102	1545.67	659.666	0	0	1	10383.5	4431.5	0	0	4	28	622.154	102.34
445_ChAT_ChATcreTdTOM_171020	445_Section2_ChAT_ChATcreTdTOM_171020	1	57	0	58	58	58	514.38	807.333	0	0	1	3455.5	5423.5	0	0	3	11	-409.137	250.007
445_ChAT_ChATcreTdTOM_171020	445_Section2_ChAT_ChATcreTdTOM_171020	1	58	0	45	45	45	1336.08	835.914	0	0	1	8975.5	5615.5	0	0	3	11	412.561	278.588
445_ChAT_ChATcreTdTOM_171020	445_Section3_ChAT_ChATcreTdTOM_171020	2	1	0	17	17	17	1277.5	918.158	0	0	2	8582	6168	0	0	0	1	0	0
445_ChAT_ChATcreTdTOM_171020	445_Section3_ChAT_ChATcreTdTOM_171020	2	2	0	60	60	60	1240.51	952.47	0	0	2	8333.5	6398.5	0	0	1	1	-36.991	34.312
445_ChAT_ChATcreTdTOM_171020	445_Section3_ChAT_ChATcreTdTOM_171020	2	3	0	52	52	52	1076.32	1005.91	0	0	1	7230.5	6757.5	0	0	2	8	-201.182	87.752
445_ChAT_ChATcreTdTOM_171020	445_Section3_ChAT_ChATcreTdTOM_171020	2	4	0	62	62	62	1137.05	994.002	0	0	1	7638.5	6677.5	0	0	2	8	-140.448	75.844
445_ChAT_ChATcreTdTOM_171020	445_Section3_ChAT_ChATcreTdTOM_171020	2	5	0	61	61	61	929.248	867.174	0	0	1	6242.5	5825.5	0	0	2	8	-348.254	-50.984
445_ChAT_ChATcreTdTOM_171020	445_Section3_ChAT_ChATcreTdTOM_171020	2	6	0	18	18	18	740.942	667.704	0	0	1	4977.5	4485.5	0	0	2	8	-536.56	-250.454
445_ChAT_ChATcreTdTOM_171020	445_Section3_ChAT_ChATcreTdTOM_171020	2	7	0	1	1	1	701.644	518.846	0	0	1	4713.5	3485.5	0	0	2	8	-575.858	-399.312
445_ChAT_ChATcreTdTOM_171020	445_Section3_ChAT_ChATcreTdTOM_171020	2	8	0	117	117	117	794.531	493.242	0	0	1	5337.5	3313.5	0	0	2	8	-482.971	-424.916
445_ChAT_ChATcreTdTOM_171020	445_Section3_ChAT_ChATcreTdTOM_171020	2	9	0	74	74	74	900.519	468.234	0	0	1	6049.5	3145.5	0	0	2	8	-376.983	-449.924
445_ChAT_ChATcreTdTOM_171020	445_Section3_ChAT_ChATcreTdTOM_171020	2	10	0	46	46	46	1492.53	591.637	0	0	1	10026.5	3974.5	0	0	2	8	215.026	-326.521
445_ChAT_ChATcreTdTOM_171020	445_Section3_ChAT_ChATcreTdTOM_171020	2	11	0	28	28	28	1336.82	867.919	0	0	1	8980.5	5830.5	0	0	3	6	59.32	-50.239
445_ChAT_ChATcreTdTOM_171020	445_Section3_ChAT_ChATcreTdTOM_171020	2	12	0	28	28	28	1279.66	846.483	0	0	1	8596.5	5686.5	0	0	3	6	2.159	-71.675
445_ChAT_ChATcreTdTOM_171020	445_Section3_ChAT_ChATcreTdTOM_171020	2	13	0	38	38	38	1190.35	873.277	0	0	1	7996.5	5866.5	0	0	3	6	-87.156	-44.881
445_ChAT_ChATcreTdTOM_171020	445_Section3_ChAT_ChATcreTdTOM_171020	2	14	0	44	44	44	1759.43	562.164	0	0	1	11819.5	3776.5	0	0	3	6	481.929	-355.994
445_ChAT_ChATcreTdTOM_171020	445_Section3_ChAT_ChATcreTdTOM_171020	2	15	0	38	38	38	1855.89	612.18	0	0	1	12467.5	4112.5	0	0	3	6	578.389	-305.978
445_ChAT_ChATcreTdTOM_171020	445_Section3_ChAT_ChATcreTdTOM_171020	2	16	0	0	0	0	801.974	588.958	0	0	1	5387.5	3956.5	0	0	3	6	-475.528	-329.2
445_ChAT_ChATcreTdTOM_171020	445_Section3_ChAT_ChATcreTdTOM_171020	2	17	0	117	117	117	709.087	976.585	0	0	1	4763.5	6560.5	0	0	4	29	-568.415	58.427
445_ChAT_ChATcreTdTOM_171020	445_Section3_ChAT_ChATcreTdTOM_171020	2	18	0	69	69	69	719.805	1017.67	0	0	1	4835.5	6836.5	0	0	4	29	-557.697	99.512
445_ChAT_ChATcreTdTOM_171020	445_Section3_ChAT_ChATcreTdTOM_171020	2	19	0	3	3	3	659.07	1089.12	0	0	1	4427.5	7316.5	0	0	4	29	-618.432	170.964
445_ChAT_ChATcreTdTOM_171020	445_Section3_ChAT_ChATcreTdTOM_171020	2	20	0	73	73	73	743.026	1096.27	0	0	1	4991.5	7364.5	0	0	4	29	-534.476	178.109
445_ChAT_ChATcreTdTOM_171020	445_Section3_ChAT_ChATcreTdTOM_171020	2	21	0	72	72	72	693.01	1131.99	0	0	1	4655.5	7604.5	0	0	4	29	-584.492	213.835
445_ChAT_ChATcreTdTOM_171020	445_Section3_ChAT_ChATcreTdTOM_171020	2	22	0	16	16	16	664.429	1178.44	0	0	1	4463.5	7916.5	0	0	4	29	-613.073	260.279
445_ChAT_ChATcreTdTOM_171020	445_Section3_ChAT_ChATcreTdTOM_171020	2	23	0	35	35	35	639.421	1053.4	0	0	1	4295.5	7076.5	0	0	4	29	-638.081	135.238
445_ChAT_ChATcreTdTOM_171020	445_Section3_ChAT_ChATcreTdTOM_171020	2	24	0	3	3	3	601.909	1049.82	0	0	1	4043.5	7052.5	0	0	4	29	-675.593	131.665
445_ChAT_ChATcreTdTOM_171020	445_Section3_ChAT_ChATcreTdTOM_171020	2	25	0	85	85	85	557.251	1090.91	0	0	1	3743.5	7328.5	0	0	4	29	-720.251	172.75
445_ChAT_ChATcreTdTOM_171020	445_Section3_ChAT_ChATcreTdTOM_171020	2	26	0	81	81	81	521.525	1121.28	0	0	1	3503.5	7532.5	0	0	4	29	-755.977	203.117
445_ChAT_ChATcreTdTOM_171020	445_Section3_ChAT_ChATcreTdTOM_171020	2	27	0	61	61	61	571.542	1321.34	0	0	1	3839.5	8876.5	0	0	4	29	-705.96	403.183
445_ChAT_ChATcreTdTOM_171020	445_Section3_ChAT_ChATcreTdTOM_171020	2	28	0	62	62	62	589.405	1362.43	0	0	1	3959.5	9152.5	0	0	4	29	-688.097	444.268
445_ChAT_ChATcreTdTOM_171020	445_Section3_ChAT_ChATcreTdTOM_171020	2	29	0	17	17	17	707.3	1269.54	0	0	1	4751.5	8528.5	0	0	4	29	-570.202	351.38
445_ChAT_ChATcreTdTOM_171020	445_Section3_ChAT_ChATcreTdTOM_171020	2	30	0	75	75	75	730.522	1294.55	0	0	1	4907.5	8696.5	0	0	4	29	-546.98	376.389
445_ChAT_ChATcreTdTOM_171020	445_Section3_ChAT_ChATcreTdTOM_171020	2	31	0	1	1	1	741.24	1244.53	0	0	1	4979.5	8360.5	0	0	4	29	-536.262	326.372
445_ChAT_ChATcreTdTOM_171020	445_Section3_ChAT_ChATcreTdTOM_171020	2	32	0	28	28	28	768.035	1265.97	0	0	1	5159.5	8504.5	0	0	4	29	-509.467	347.808
445_ChAT_ChATcreTdTOM_171020	445_Section3_ChAT_ChATcreTdTOM_171020	2	33	0	151	151	151	1059.2	1221.31	0	0	1	7115.5	8204.5	0	0	4	29	-218.3	303.15
445_ChAT_ChATcreTdTOM_171020	445_Section3_ChAT_ChATcreTdTOM_171020	2	34	0	70	70	70	1782.65	1083.76	0	0	1	11975.5	7280.5	0	0	4	29	505.151	165.605
445_ChAT_ChATcreTdTOM_171020	445_Section3_ChAT_ChATcreTdTOM_171020	2	35	0	94	94	94	1852.32	1074.83	0	0	1	12443.5	7220.5	0	0	4	29	574.817	156.674
445_ChAT_ChATcreTdTOM_171020	445_Section3_ChAT_ChATcreTdTOM_171020	2	36	0	76	76	76	1918.41	1096.27	0	0	1	12887.5	7364.5	0	0	4	29	640.91	178.109
445_ChAT_ChATcreTdTOM_171020	445_Section3_ChAT_ChATcreTdTOM_171020	2	37	0	15	15	15	1943.42	1062.33	0	0	1	13055.5	7136.5	0	0	4	29	665.918	144.17
445_ChAT_ChATcreTdTOM_171020	445_Section3_ChAT_ChATcreTdTOM_171020	2	38	0	8	8	8	2016.66	1089.12	0	0	1	13547.5	7316.5	0	0	4	29	739.156	170.964
445_ChAT_ChATcreTdTOM_171020	445_Section3_ChAT_ChATcreTdTOM_171020	2	39	0	50	50	50	1789.8	1140.92	0	0	1	12023.5	7664.5	0	0	4	29	512.296	222.767
445_ChAT_ChATcreTdTOM_171020	445_Section3_ChAT_ChATcreTdTOM_171020	2	40	0	64	64	64	1791.59	1183.8	0	0	1	12035.5	7952.5	0	0	4	29	514.083	265.638
445_ChAT_ChATcreTdTOM_171020	445_Section3_ChAT_ChATcreTdTOM_171020	2	41	0	100	100	100	1798.73	1221.31	0	0	1	12083.5	8204.5	0	0	4	29	521.228	303.15
445_ChAT_ChATcreTdTOM_171020	445_Section3_ChAT_ChATcreTdTOM_171020	2	42	0	74	74	74	1809.45	1253.46	0	0	1	12155.5	8420.5	0	0	4	29	531.946	335.304
445_ChAT_ChATcreTdTOM_171020	445_Section3_ChAT_ChATcreTdTOM_171020	2	43	0	61	61	61	1923.77	1276.68	0	0	1	12923.5	8576.5	0	0	4	29	646.269	358.526
445_ChAT_ChATcreTdTOM_171020	445_Section3_ChAT_ChATcreTdTOM_171020	2	44	0	92	92	92	1916.63	1305.26	0	0	1	12875.5	8768.5	0	0	4	29	639.124	387.106
445_ChAT_ChATcreTdTOM_171020	445_Section3_ChAT_ChATcreTdTOM_171020	2	45	0	32	32	32	1972	1301.69	0	0	1	13247.5	8744.5	0	0	4	29	694.499	383.534
445_ChAT_ChATcreTdTOM_171020	445_Section4_ChAT_ChATcreTdTOM_171020	3	1	0	33	33	33	1350.02	940.493	0	0	2	3402	2370	0	0	0	1	0	0
445_ChAT_ChATcreTdTOM_171020	445_Section4_ChAT_ChATcreTdTOM_171020	3	2	0	25	25	25	1837.93	640.289	0	0	2	4631.5	1613.5	0	0	1	1	487.906	-300.204
445_ChAT_ChATcreTdTOM_171020	445_Section4_ChAT_ChATcreTdTOM_171020	3	3	0	15	15	15	1074.82	890.69	0	0	1	2708.5	2244.5	0	0	2	27	-275.203	-49.803
445_ChAT_ChATcreTdTOM_171020	445_Section4_ChAT_ChATcreTdTOM_171020	3	4	0	6	6	6	1049.42	943.469	0	0	1	2644.5	2377.5	0	0	2	27	-300.6	2.976
445_ChAT_ChATcreTdTOM_171020	445_Section4_ChAT_ChATcreTdTOM_171020	3	5	0	8	8	8	1160.54	939.104	0	0	1	2924.5	2366.5	0	0	2	27	-189.487	-1.389
445_ChAT_ChATcreTdTOM_171020	445_Section4_ChAT_ChATcreTdTOM_171020	3	6	0	16	16	16	1176.01	944.659	0	0	1	2963.5	2380.5	0	0	2	27	-174.01	4.166
445_ChAT_ChATcreTdTOM_171020	445_Section4_ChAT_ChATcreTdTOM_171020	3	7	0	16	16	16	1396.12	982.094	0	0	1	3518.17	2474.83	0	0	2	27	46.099	41.601
445_ChAT_ChATcreTdTOM_171020	445_Section4_ChAT_ChATcreTdTOM_171020	3	8	0	27	27	27	1314.64	754.577	0	0	1	3312.83	1901.5	0	0	2	27	-35.384	-185.916
445_ChAT_ChATcreTdTOM_171020	445_Section4_ChAT_ChATcreTdTOM_171020	3	9	0	10	10	10	1543.74	876.801	0	0	1	3890.17	2209.5	0	0	2	27	193.721	-63.692
445_ChAT_ChATcreTdTOM_171020	445_Section4_ChAT_ChATcreTdTOM_171020	3	10	0	17	17	17	1621.79	992.411	0	0	1	4086.83	2500.83	0	0	2	27	271.765	51.918
445_ChAT_ChATcreTdTOM_171020	445_Section4_ChAT_ChATcreTdTOM_171020	3	11	0	21	21	21	1639.78	993.999	0	0	1	4132.17	2504.83	0	0	2	27	289.754	53.506
445_ChAT_ChATcreTdTOM_171020	445_Section4_ChAT_ChATcreTdTOM_171020	3	12	0	7	7	7	1635.54	1013.05	0	0	1	4121.5	2552.83	0	0	2	27	285.521	72.554
445_ChAT_ChATcreTdTOM_171020	445_Section4_ChAT_ChATcreTdTOM_171020	3	13	0	14	14	14	1708.56	852.726	0	0	1	4305.5	2148.83	0	0	2	27	358.538	-87.767
445_ChAT_ChATcreTdTOM_171020	445_Section4_ChAT_ChATcreTdTOM_171020	3	14	0	10	10	10	1755.12	883.944	0	0	1	4422.83	2227.5	0	0	2	27	405.1	-56.549
445_ChAT_ChATcreTdTOM_171020	445_Section4_ChAT_ChATcreTdTOM_171020	3	15	0	14	14	14	1942.03	800.874	0	0	1	4893.83	2018.17	0	0	2	27	592.008	-139.619
445_ChAT_ChATcreTdTOM_171020	445_Section4_ChAT_ChATcreTdTOM_171020	3	16	0	14	14	14	1870.6	723.624	0	0	1	4713.83	1823.5	0	0	2	27	520.578	-216.869
445_ChAT_ChATcreTdTOM_171020	445_Section4_ChAT_ChATcreTdTOM_171020	3	17	0	14	14	14	1775.36	779.18	0	0	1	4473.83	1963.5	0	0	2	27	425.339	-161.313
445_ChAT_ChATcreTdTOM_171020	445_Section4_ChAT_ChATcreTdTOM_171020	3	18	0	137	137	137	1756.58	495.048	0	0	1	4426.5	1247.5	0	0	2	27	406.555	-445.445
445_ChAT_ChATcreTdTOM_171020	445_Section4_ChAT_ChATcreTdTOM_171020	3	19	0	33	33	33	1610.54	470.445	0	0	1	4058.5	1185.5	0	0	2	27	260.521	-470.048
445_ChAT_ChATcreTdTOM_171020	445_Section4_ChAT_ChATcreTdTOM_171020	3	20	0	37	37	37	1531.97	423.618	0	0	1	3860.5	1067.5	0	0	2	27	181.948	-516.875
445_ChAT_ChATcreTdTOM_171020	445_Section4_ChAT_ChATcreTdTOM_171020	3	21	0	255	255	255	868.335	469.916	0	0	1	2188.17	1184.17	0	0	2	27	-481.688	-470.577
445_ChAT_ChATcreTdTOM_171020	445_Section4_ChAT_ChATcreTdTOM_171020	3	22	0	41	41	41	870.187	692.935	0	0	1	2192.83	1746.17	0	0	2	27	-479.836	-247.558
445_ChAT_ChATcreTdTOM_171020	445_Section4_ChAT_ChATcreTdTOM_171020	3	23	0	9	9	9	871.774	763.836	0	0	1	2196.83	1924.83	0	0	2	27	-478.249	-176.657
445_ChAT_ChATcreTdTOM_171020	445_Section4_ChAT_ChATcreTdTOM_171020	3	24	0	7	7	7	908.812	759.074	0	0	1	2290.17	1912.83	0	0	2	27	-441.211	-181.419
445_ChAT_ChATcreTdTOM_171020	445_Section4_ChAT_ChATcreTdTOM_171020	3	25	0	13	13	13	889.764	779.18	0	0	1	2242.17	1963.5	0	0	2	27	-460.259	-161.313
445_ChAT_ChATcreTdTOM_171020	445_Section4_ChAT_ChATcreTdTOM_171020	3	26	0	16	16	16	764.365	835.266	0	0	1	1926.17	2104.83	0	0	2	27	-585.658	-105.227
445_ChAT_ChATcreTdTOM_171020	445_Section4_ChAT_ChATcreTdTOM_171020	3	27	0	12	12	12	773.36	742.143	0	0	1	1948.83	1870.17	0	0	2	27	-576.663	-198.35
445_ChAT_ChATcreTdTOM_171020	445_Section4_ChAT_ChATcreTdTOM_171020	3	28	0	5	5	5	972.834	1042.68	0	0	1	2451.5	2627.5	0	0	2	27	-377.189	102.184
445_ChAT_ChATcreTdTOM_171020	445_Section4_ChAT_ChATcreTdTOM_171020	3	29	0	18	18	18	1209.35	1042.28	0	0	1	3047.5	2626.5	0	0	2	27	-140.677	101.787
445_ChAT_ChATcreTdTOM_171020	445_Section4_ChAT_ChATcreTdTOM_171020	3	30	0	7	7	7	1411.73	780.768	0	0	1	3557.5	1967.5	0	0	3	9	61.708	-159.725
445_ChAT_ChATcreTdTOM_171020	445_Section4_ChAT_ChATcreTdTOM_171020	3	31	0	2	2	2	1418.87	897.436	0	0	1	3575.5	2261.5	0	0	3	9	68.851	-43.057
445_ChAT_ChATcreTdTOM_171020	445_Section4_ChAT_ChATcreTdTOM_171020	3	32	0	2	2	2	1349.83	868.864	0	0	1	3401.5	2189.5	0	0	3	9	-0.198	-71.629
445_ChAT_ChATcreTdTOM_171020	445_Section4_ChAT_ChATcreTdTOM_171020	3	33	0	5	5	5	1773.64	745.053	0	0	1	4469.5	1877.5	0	0	3	9	423.619	-195.44
445_ChAT_ChATcreTdTOM_171020	445_Section4_ChAT_ChATcreTdTOM_171020	3	34	0	30	30	30	780.768	547.43	0	0	1	1967.5	1379.5	0	0	3	9	-569.255	-393.063
445_ChAT_ChATcreTdTOM_171020	445_Section4_ChAT_ChATcreTdTOM_171020	3	35	0	4	4	4	887.912	523.62	0	0	1	2237.5	1319.5	0	0	3	9	-462.111	-416.873
445_ChAT_ChATcreTdTOM_171020	445_Section4_ChAT_ChATcreTdTOM_171020	3	36	0	1	1	1	985.533	471.238	0	0	1	2483.5	1187.5	0	0	3	9	-364.49	-469.255
445_ChAT_ChATcreTdTOM_171020	445_Section4_ChAT_ChATcreTdTOM_171020	3	37	0	11	11	11	1028.39	1159.35	0	0	1	2591.5	2921.5	0	0	3	9	-321.632	218.853
445_ChAT_ChATcreTdTOM_171020	445_Section4_ChAT_ChATcreTdTOM_171020	3	38	0	2	2	2	1083.15	1195.06	0	0	1	2729.5	3011.5	0	0	3	9	-266.869	254.567
445_ChAT_ChATcreTdTOM_171020	445_Section4_ChAT_ChATcreTdTOM_171020	3	39	0	20	20	20	1871.26	923.627	0	0	1	4715.5	2327.5	0	0	4	34	521.24	-16.866
445_ChAT_ChATcreTdTOM_171020	445_Section4_ChAT_ChATcreTdTOM_171020	3	40	0	39	39	39	1961.74	1040.3	0	0	1	4943.5	2621.5	0	0	4	34	611.717	99.803
445_ChAT_ChATcreTdTOM_171020	445_Section4_ChAT_ChATcreTdTOM_171020	3	41	0	24	24	24	1935.55	1056.96	0	0	1	4877.5	2663.5	0	0	4	34	585.527	116.47
445_ChAT_ChATcreTdTOM_171020	445_Section4_ChAT_ChATcreTdTOM_171020	3	42	0	8	8	8	1873.64	1092.68	0	0	1	4721.5	2753.5	0	0	4	34	523.621	152.185
445_ChAT_ChATcreTdTOM_171020	445_Section4_ChAT_ChATcreTdTOM_171020	3	43	0	27	27	27	1992.69	1097.44	0	0	1	5021.5	2765.5	0	0	4	34	642.67	156.947
445_ChAT_ChATcreTdTOM_171020	445_Section4_ChAT_ChATcreTdTOM_171020	3	44	0	25	25	25	1928.41	1164.11	0	0	1	4859.5	2933.5	0	0	4	34	578.384	223.615
445_ChAT_ChATcreTdTOM_171020	445_Section4_ChAT_ChATcreTdTOM_171020	3	45	0	15	15	15	1954.6	1276.01	0	0	1	4925.5	3215.5	0	0	4	34	604.574	335.521
445_ChAT_ChATcreTdTOM_171020	445_Section4_ChAT_ChATcreTdTOM_171020	3	46	0	8	8	8	1861.74	1233.16	0	0	1	4691.5	3107.5	0	0	4	34	511.716	292.663
445_ChAT_ChATcreTdTOM_171020	445_Section4_ChAT_ChATcreTdTOM_171020	3	47	0	33	33	33	1852.21	1273.63	0	0	1	4667.5	3209.5	0	0	4	34	502.192	333.14
445_ChAT_ChATcreTdTOM_171020	445_Section4_ChAT_ChATcreTdTOM_171020	3	48	0	32	32	32	1873.64	1304.59	0	0	1	4721.5	3287.5	0	0	4	34	523.621	364.093
445_ChAT_ChATcreTdTOM_171020	445_Section4_ChAT_ChATcreTdTOM_171020	3	49	0	27	27	27	1914.12	1302.2	0	0	1	4823.5	3281.5	0	0	4	34	564.098	361.712
445_ChAT_ChATcreTdTOM_171020	445_Section4_ChAT_ChATcreTdTOM_171020	3	50	0	13	13	13	1606.97	1276.01	0	0	1	4049.5	3215.5	0	0	4	34	256.949	335.521
445_ChAT_ChATcreTdTOM_171020	445_Section4_ChAT_ChATcreTdTOM_171020	3	51	0	38	38	38	1842.69	1364.11	0	0	1	4643.5	3437.5	0	0	4	34	492.668	423.618
445_ChAT_ChATcreTdTOM_171020	445_Section4_ChAT_ChATcreTdTOM_171020	3	52	0	21	21	21	1964.12	1352.21	0	0	1	4949.5	3407.5	0	0	4	34	614.098	411.713
445_ChAT_ChATcreTdTOM_171020	445_Section4_ChAT_ChATcreTdTOM_171020	3	53	0	40	40	40	1995.07	1373.63	0	0	1	5027.5	3461.5	0	0	4	34	645.051	433.142
445_ChAT_ChATcreTdTOM_171020	445_Section4_ChAT_ChATcreTdTOM_171020	3	54	0	37	37	37	2047.46	1359.35	0	0	1	5159.5	3425.5	0	0	4	34	697.433	418.856
445_ChAT_ChATcreTdTOM_171020	445_Section4_ChAT_ChATcreTdTOM_171020	3	55	0	6	6	6	2023.65	1397.44	0	0	1	5099.5	3521.5	0	0	4	34	673.623	456.952
445_ChAT_ChATcreTdTOM_171020	445_Section4_ChAT_ChATcreTdTOM_171020	3	56	0	57	57	57	692.671	1385.54	0	0	1	1745.5	3491.5	0	0	4	34	-657.352	445.047
445_ChAT_ChATcreTdTOM_171020	445_Section4_ChAT_ChATcreTdTOM_171020	3	57	0	16	16	16	759.339	1299.82	0	0	1	1913.5	3275.5	0	0	4	34	-590.684	359.331
445_ChAT_ChATcreTdTOM_171020	445_Section4_ChAT_ChATcreTdTOM_171020	3	58	0	18	18	18	802.196	1330.78	0	0	1	2021.5	3353.5	0	0	4	34	-547.827	390.284
445_ChAT_ChATcreTdTOM_171020	445_Section4_ChAT_ChATcreTdTOM_171020	3	59	0	9	9	9	861.721	1321.25	0	0	1	2171.5	3329.5	0	0	4	34	-488.302	380.76
445_ChAT_ChATcreTdTOM_171020	445_Section4_ChAT_ChATcreTdTOM_171020	3	60	0	10	10	10	833.943	1272.44	0	0	1	2101.5	3206.5	0	0	4	34	-516.08	331.95
445_ChAT_ChATcreTdTOM_171020	445_Section4_ChAT_ChATcreTdTOM_171020	3	61	0	8	8	8	857.753	1231.97	0	0	1	2161.5	3104.5	0	0	4	34	-492.27	291.473
445_ChAT_ChATcreTdTOM_171020	445_Section4_ChAT_ChATcreTdTOM_171020	3	62	0	15	15	15	664.893	1201.01	0	0	1	1675.5	3026.5	0	0	4	34	-685.13	260.52
445_ChAT_ChATcreTdTOM_171020	445_Section4_ChAT_ChATcreTdTOM_171020	3	63	0	9	9	9	693.464	1179.58	0	0	1	1747.5	2972.5	0	0	4	34	-656.559	239.091
445_ChAT_ChATcreTdTOM_171020	445_Section4_ChAT_ChATcreTdTOM_171020	3	64	0	40	40	40	931.564	1151.01	0	0	2	2347.5	2900.5	0	0	4	34	-418.459	210.519
445_ChAT_ChATcreTdTOM_171020	445_Section4_ChAT_ChATcreTdTOM_171020	3	65	0	57	57	57	942.278	1185.54	0	0	2	2374.5	2987.5	0	0	4	34	-407.745	245.043
445_ChAT_ChATcreTdTOM_171020	445_Section4_ChAT_ChATcreTdTOM_171020	3	66	0	41	41	41	848.229	1186.73	0	0	2	2137.5	2990.5	0	0	4	34	-501.794	246.234
445_ChAT_ChATcreTdTOM_171020	445_Section4_ChAT_ChATcreTdTOM_171020	3	67	0	41	41	41	757.751	1115.3	0	0	2	1909.5	2810.5	0	0	4	34	-592.272	174.804
445_ChAT_ChATcreTdTOM_171020	445_Section4_ChAT_ChATcreTdTOM_171020	3	68	0	51	51	51	756.561	1062.91	0	0	2	1906.5	2678.5	0	0	4	34	-593.462	122.422
445_ChAT_ChATcreTdTOM_171020	445_Section4_ChAT_ChATcreTdTOM_171020	3	69	0	63	63	63	693.464	1076.01	0	0	2	1747.5	2711.5	0	0	4	34	-656.559	135.518
445_ChAT_ChATcreTdTOM_171020	445_Section4_ChAT_ChATcreTdTOM_171020	3	70	0	57	57	57	685.131	1036.72	0	0	2	1726.5	2612.5	0	0	4	34	-664.892	96.231
445_ChAT_ChATcreTdTOM_171020	445_Section4_ChAT_ChATcreTdTOM_171020	3	71	0	20	20	20	626.797	1026.01	0	0	2	1579.5	2585.5	0	0	4	34	-723.226	85.517
445_ChAT_ChATcreTdTOM_171020	445_Section4_ChAT_ChATcreTdTOM_171020	3	72	0	50	50	50	770.847	974.819	0	0	2	1942.5	2456.5	0	0	4	34	-579.176	34.326

## Sheet: Sheet3
			MN int	mn vent	mn tot		intermediate					dorsal					Ventral
			26	382	408		TdTom only	ChAT only	Dual			TdTom only	ChAT only	Dual			TdTom only	ChAT only	Dual
							70	21	48			62	1	37			35		8		total percent
			percent	59.1304		percent	10.1449	3.04348	6.95652		percent	8.98551	0.144928	5.36232		percent	5.07246		1.15942		100
				total cells
				690
					ChAt only	Td Tom	Dual	MN	total
				D	1	62	37		100
				I	21	70	48	26	165
				V		35	8	382	425
				total	22	167	93	408	690
